# Supplementary material for: Nucleophilic Substitution at a Coordinatively Saturated Five-Membered NHC∙Haloborane Centre
Source: MDPI journal article supplement (doi:10.3390/inorganics10070097), 2022-07-07
Supplement: s1 [file s1]

**Supporting Information**  
*for*  
**Nucleophilic Substitution at a Coordinatively Saturated  
Five-Membered NHC·Haloborane Centre**

Gargi Kundu <sup>1,2</sup>, Srinu Tothadi <sup>3</sup> and Sakya S. Sen <sup>1,2,\*</sup>

<sup>1</sup> Inorganic Chemistry and Catalysis Division, CSIR-National Chemical Laboratory,  
Dr. Homi Bhabha Road, Pashan, Pune 411008, India; g.kundu@ncl.res.in

<sup>2</sup> Academy of Scientific and Innovative Research (AcSIR), Ghaziabad 201002, India

<sup>3</sup> Analytical and Environmental Sciences Division and Centralized Instrumentation Facility,  
CSIR-Central Salt and Marine Chemicals Research Institute, Gijubhai Badheka Marg,  
Bhavnagar 364002, India; srinut@csmeri.res.in

\* Correspondence: ss.sen@ncl.res.in

**Table of Contents**

|           |                                                                           |
|-----------|---------------------------------------------------------------------------|
| <b>S1</b> | Spectroscopic characterization of <b>1-8</b>                              |
| <b>S2</b> | Molecular Structure of <b>5b</b>                                          |
| <b>S3</b> | Crystallographic data for the structural analysis of compounds <b>1-8</b> |
| <b>S4</b> | References                                                                |

## S1. Spectroscopic characterization of **1**-8

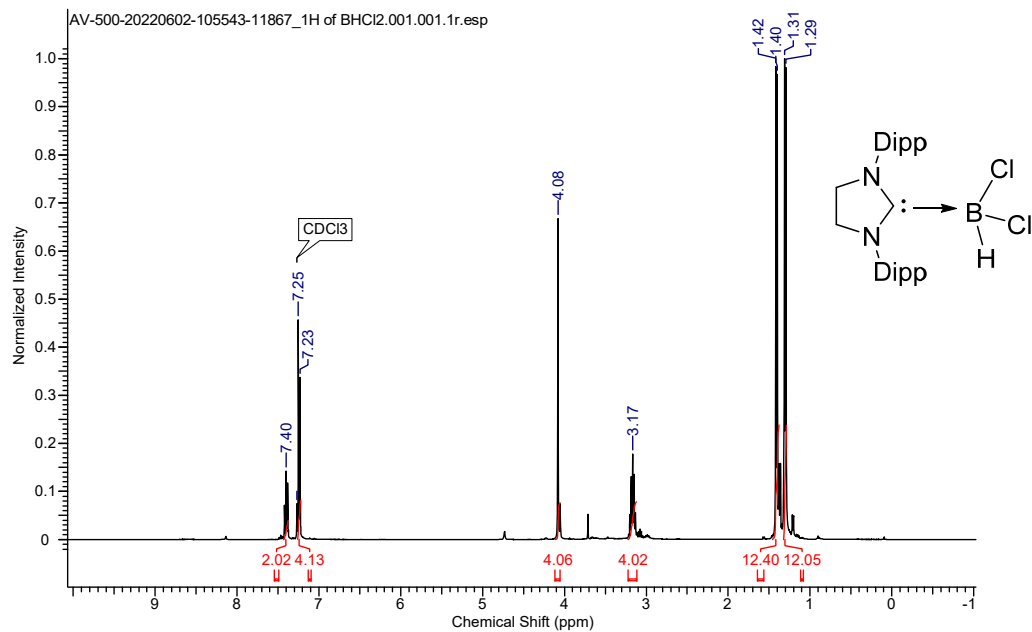

Figure S1. <sup>1</sup>H NMR spectrum of **1**.

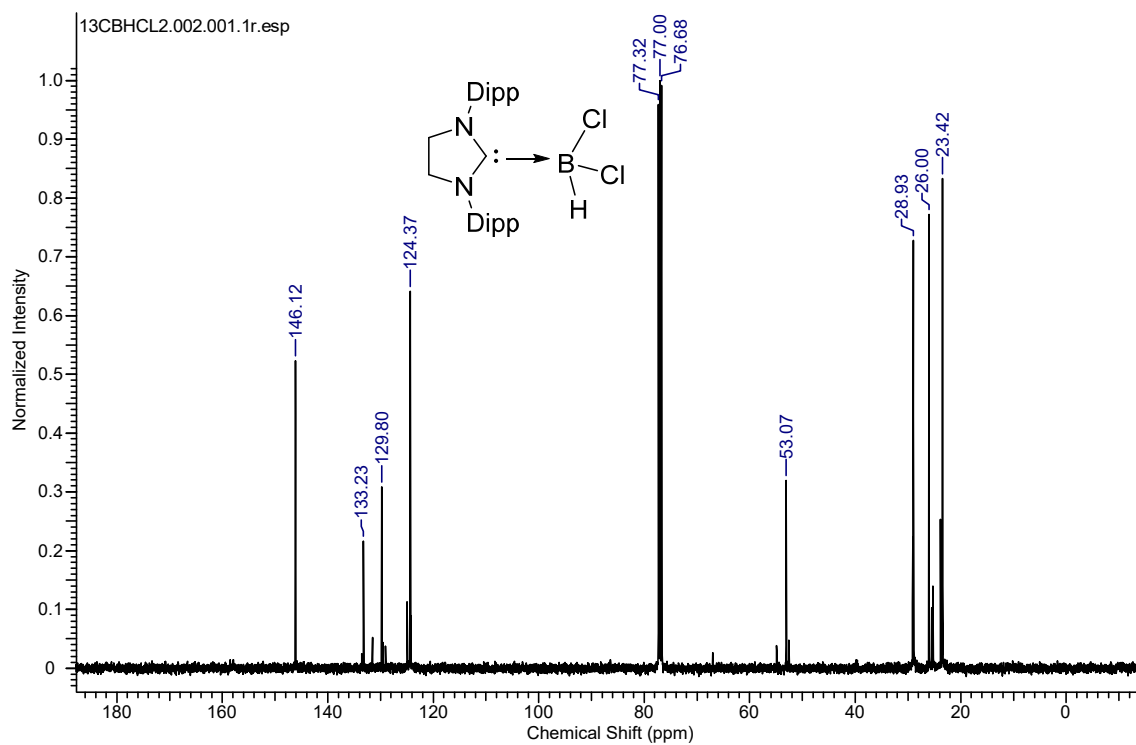

Figure S2. <sup>13</sup>C NMR spectrum of **1**.

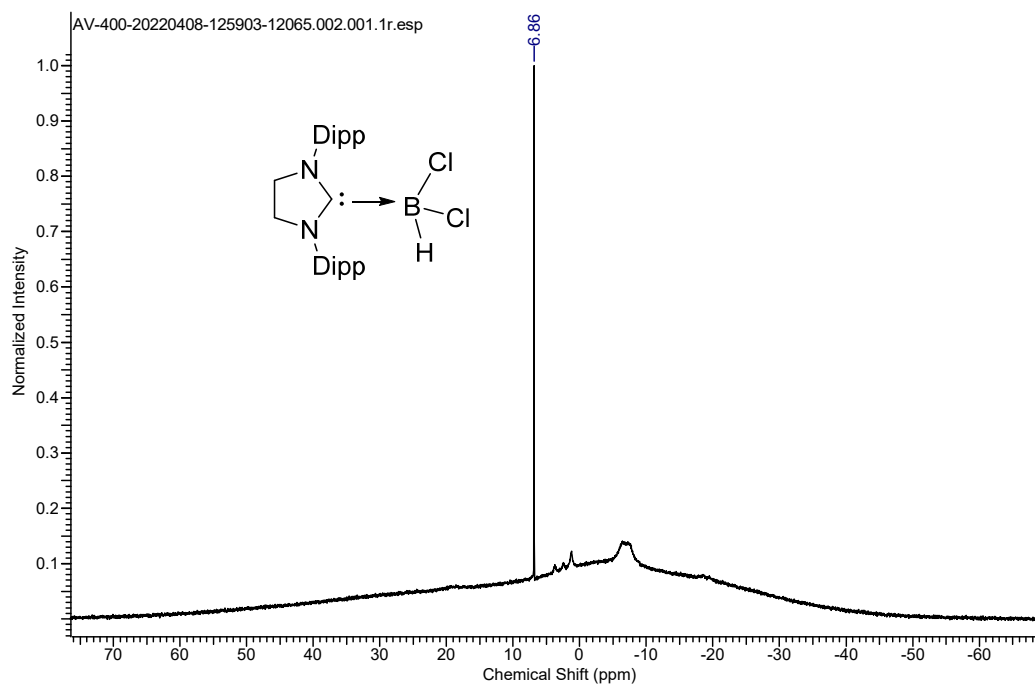

Figure S3.  $^{11}\text{B}$  NMR spectrum of **1**.

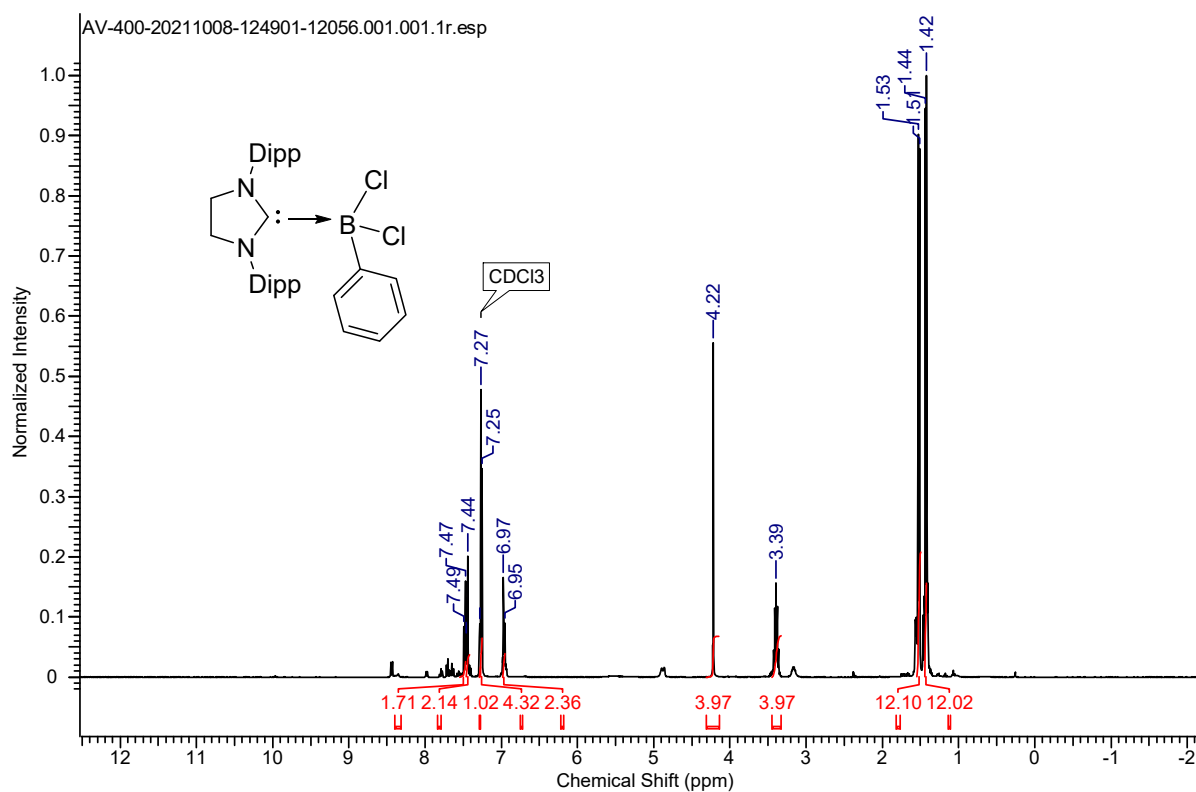

Figure S4.  $^1\text{H}$  NMR spectrum of **2**.

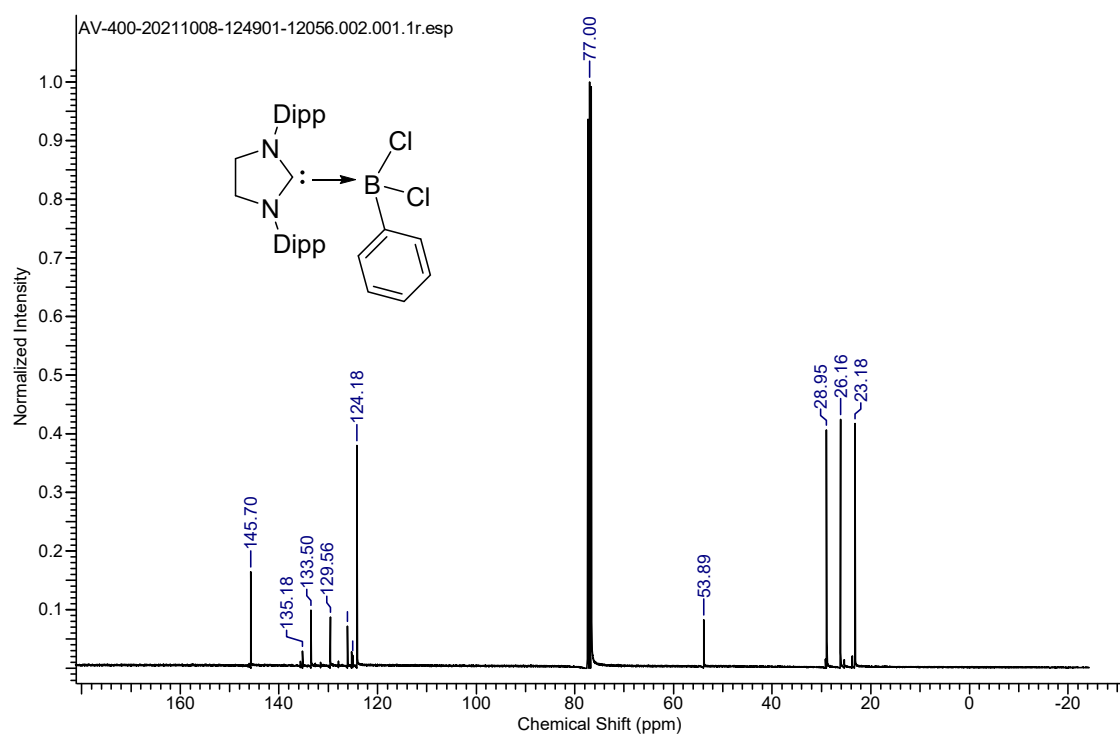

Figure S5.  $^{13}\text{C}$  NMR spectrum of **2**.

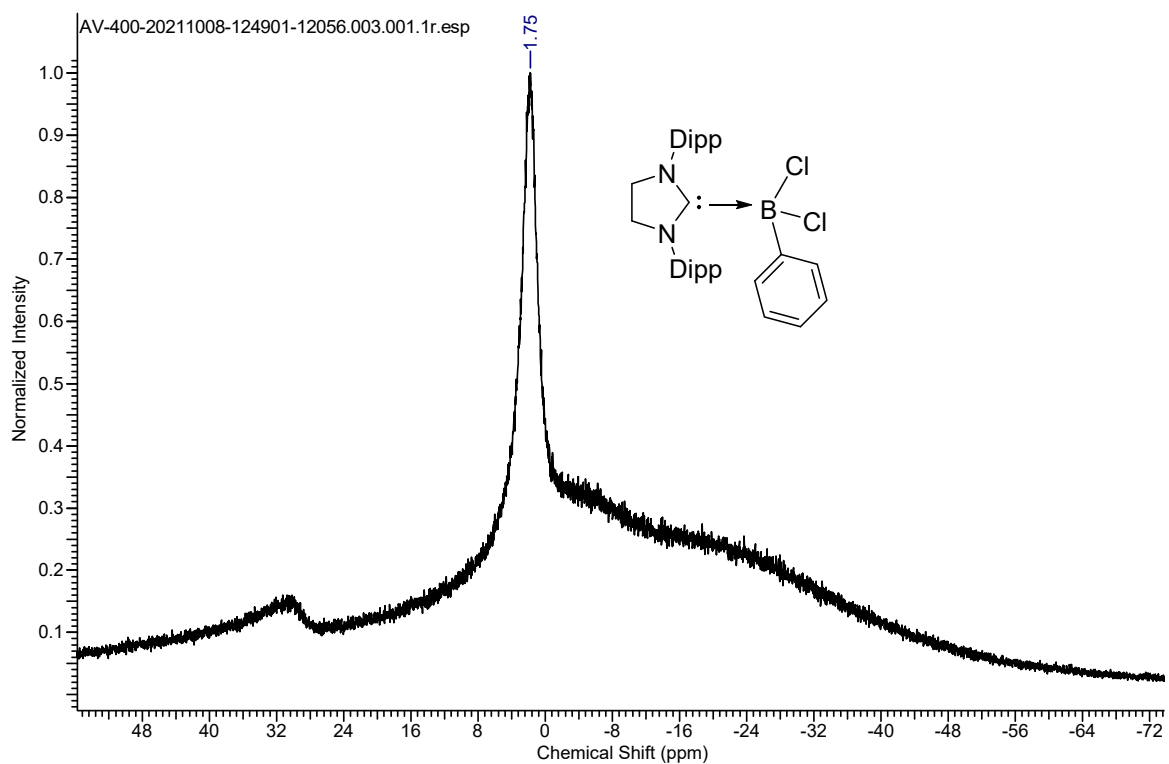

Figure S6.  $^{11}\text{B}$  NMR spectrum of **2**.

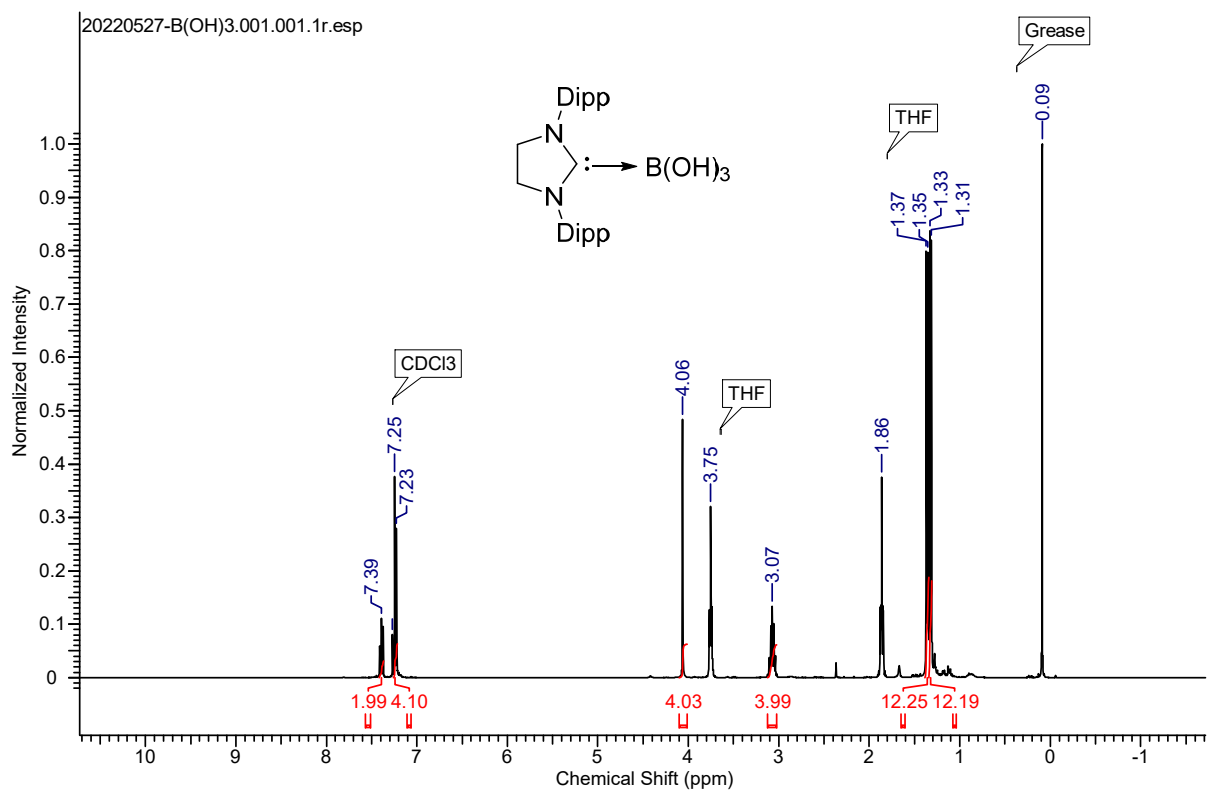

Figure S7. <sup>1</sup>H NMR spectrum of **3**.

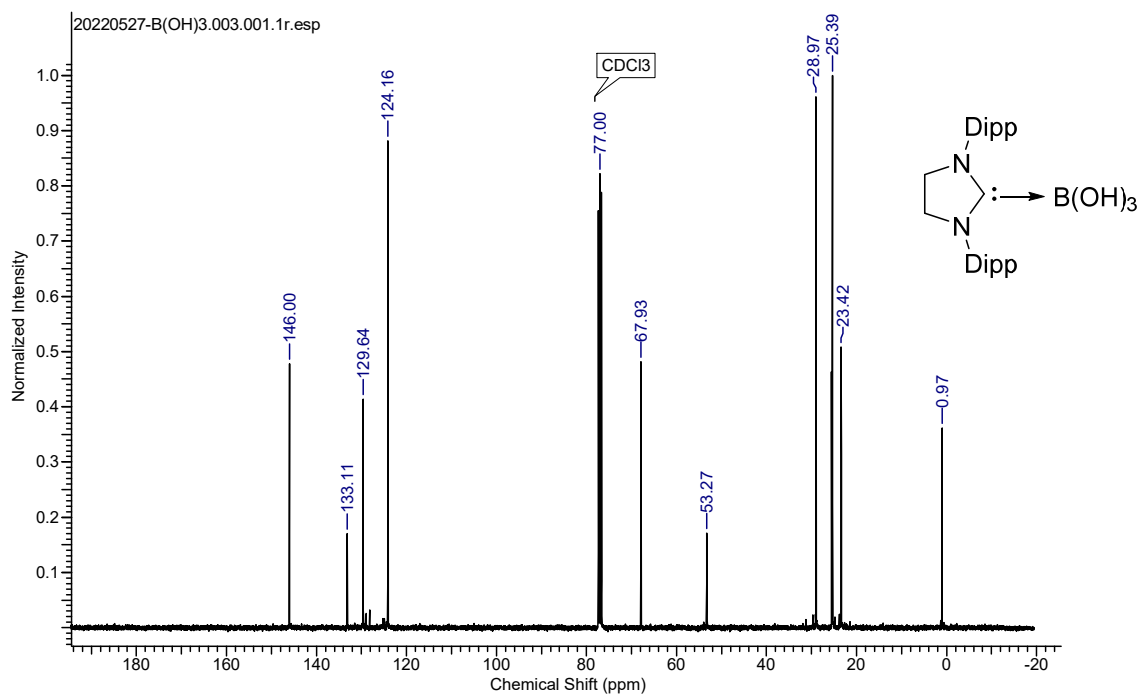

Figure S8. <sup>13</sup>C NMR spectrum of **3**.

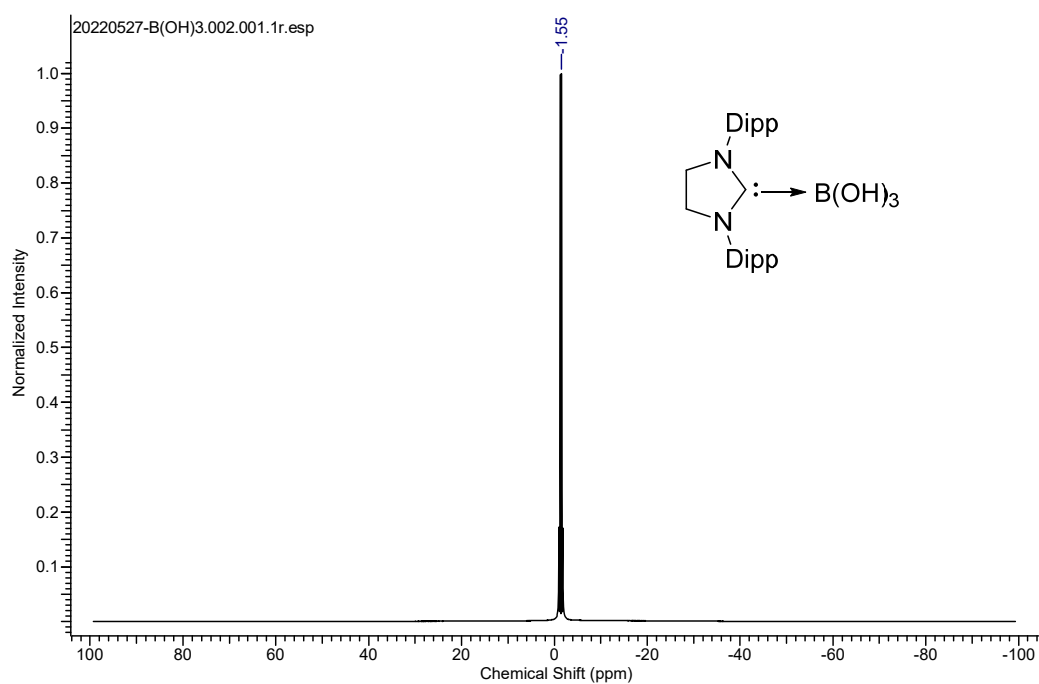

Figure S9. <sup>11</sup>B NMR spectrum of **3**.

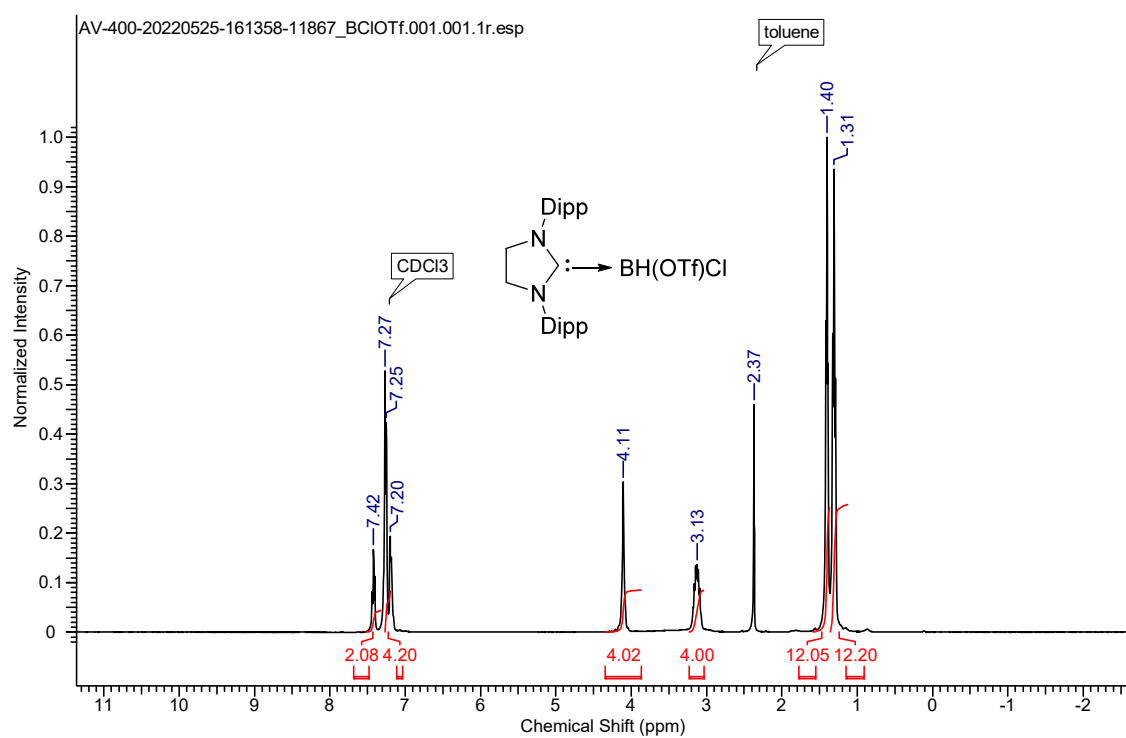

Figure S10. <sup>1</sup>H NMR spectrum of **4**.

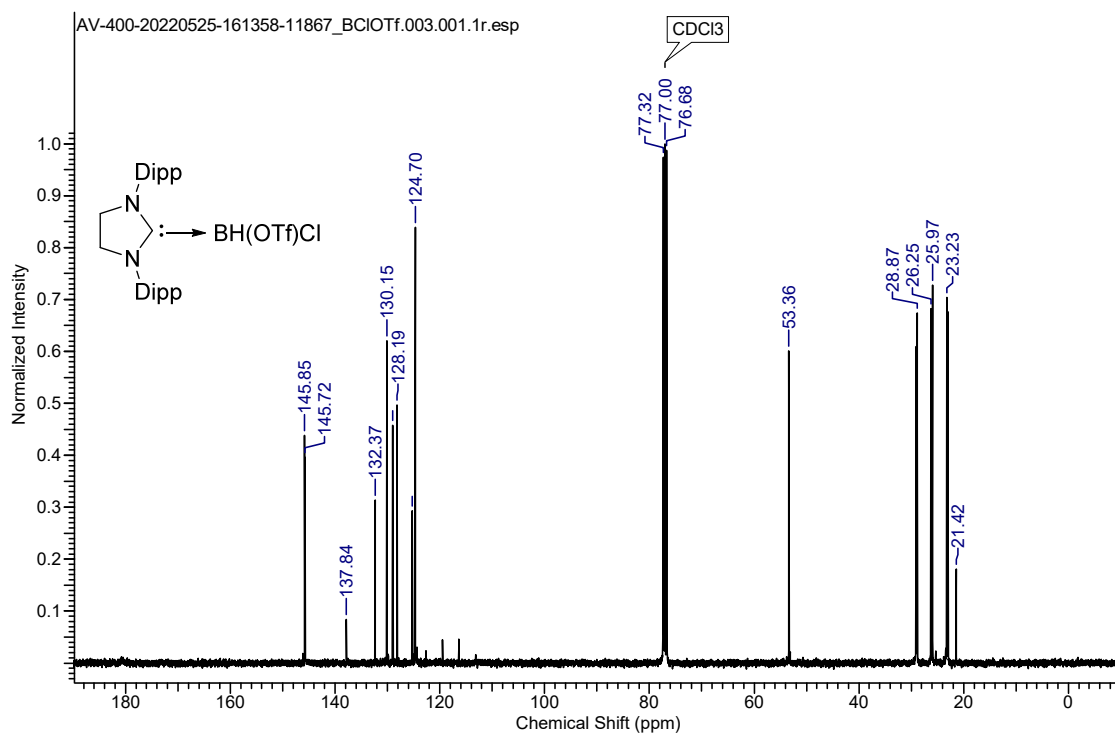

Figure S11. <sup>13</sup>C NMR spectrum of **4**.

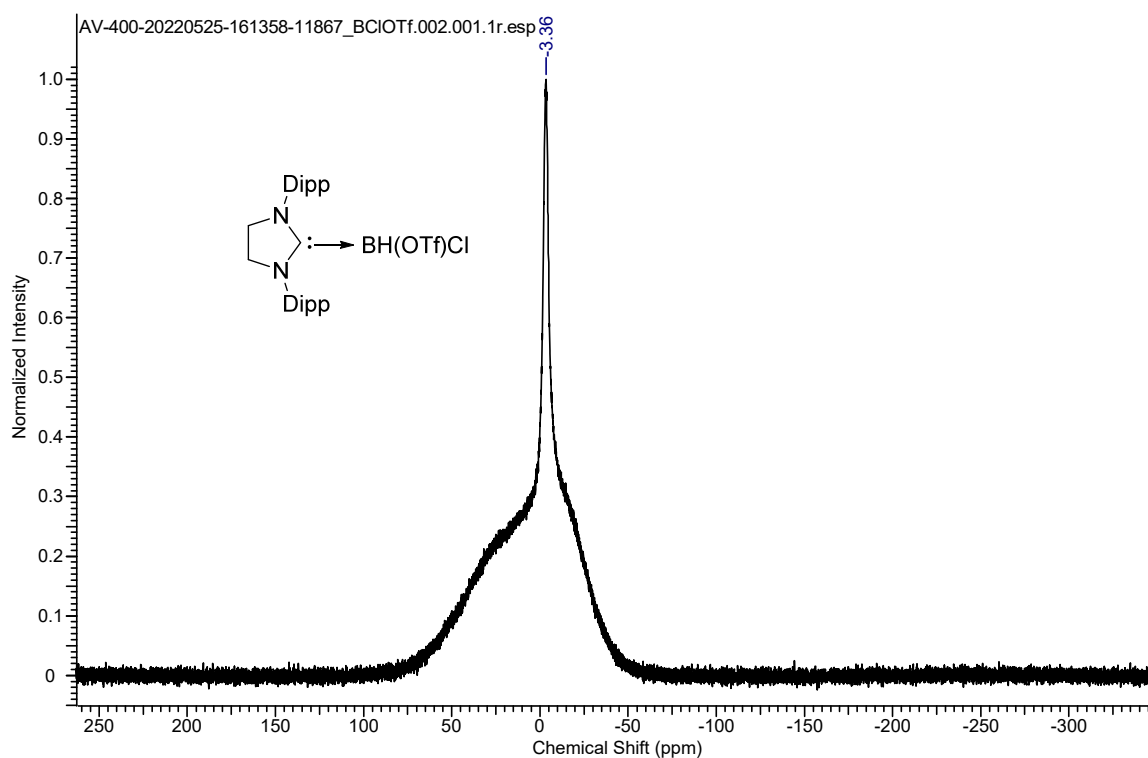

Figure S12. <sup>11</sup>B NMR spectrum of **4**.

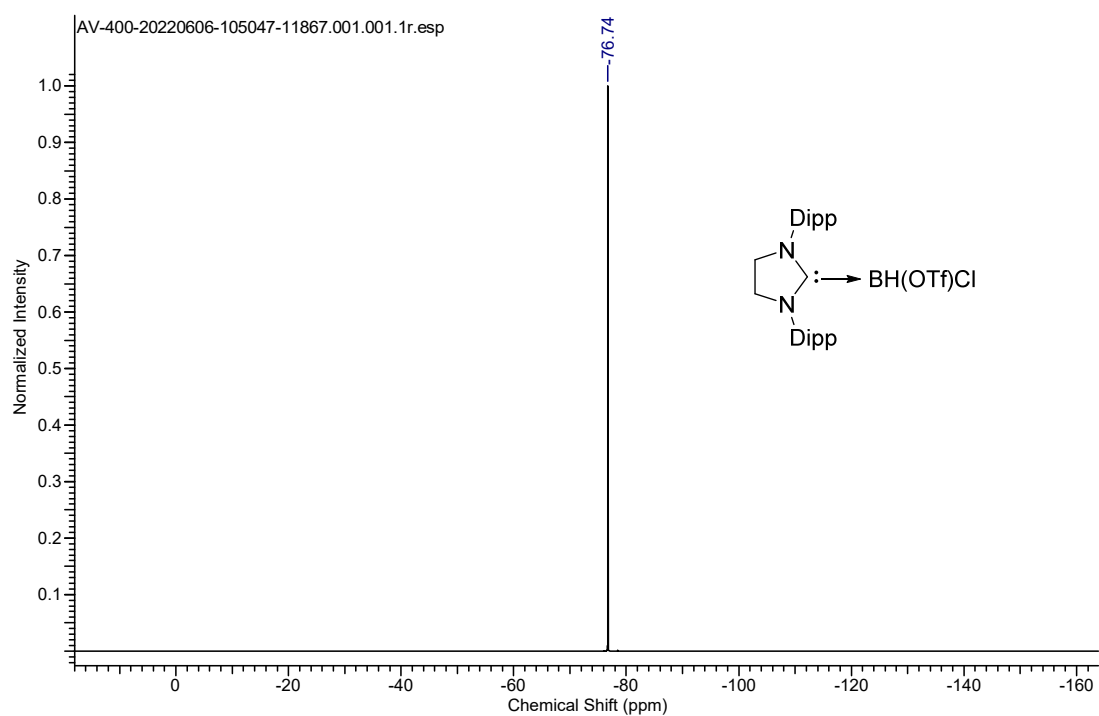

Figure S13.  $^{19}\text{F}$  NMR spectrum of **4**.

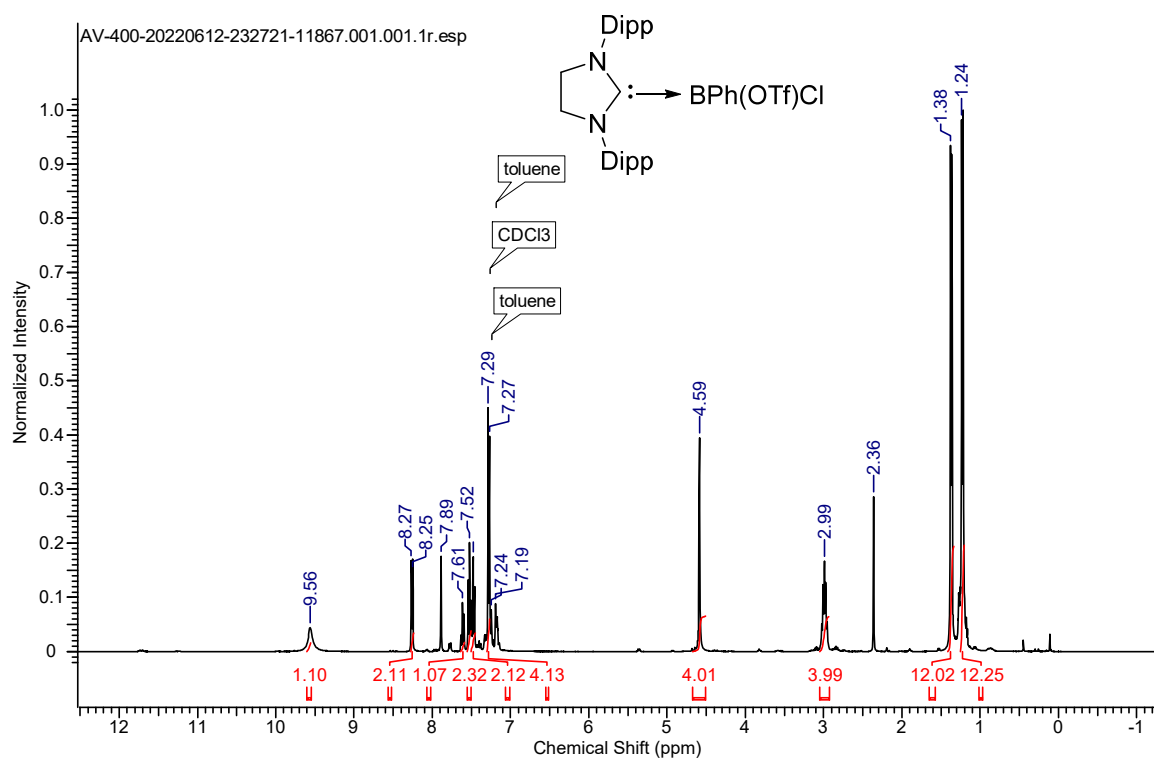

Figure S14.  $^1\text{H}$  NMR spectrum of **5b**.

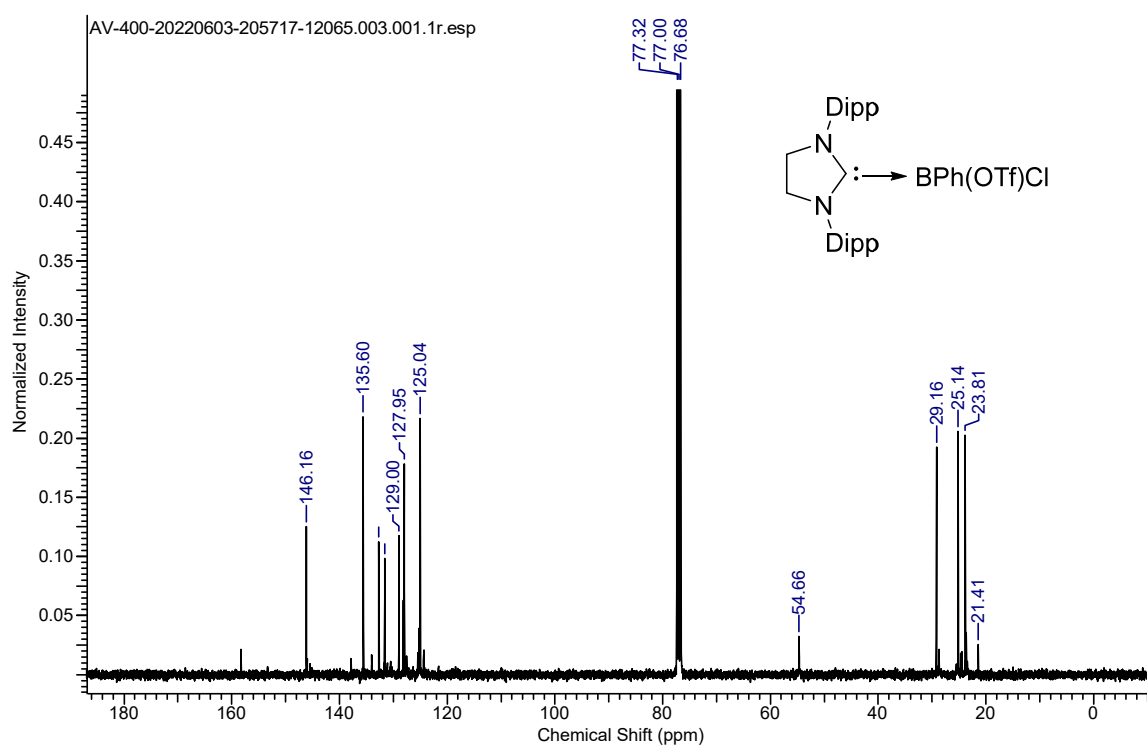

Figure S15.  $^{13}\text{C}$  NMR spectrum of **5b**.

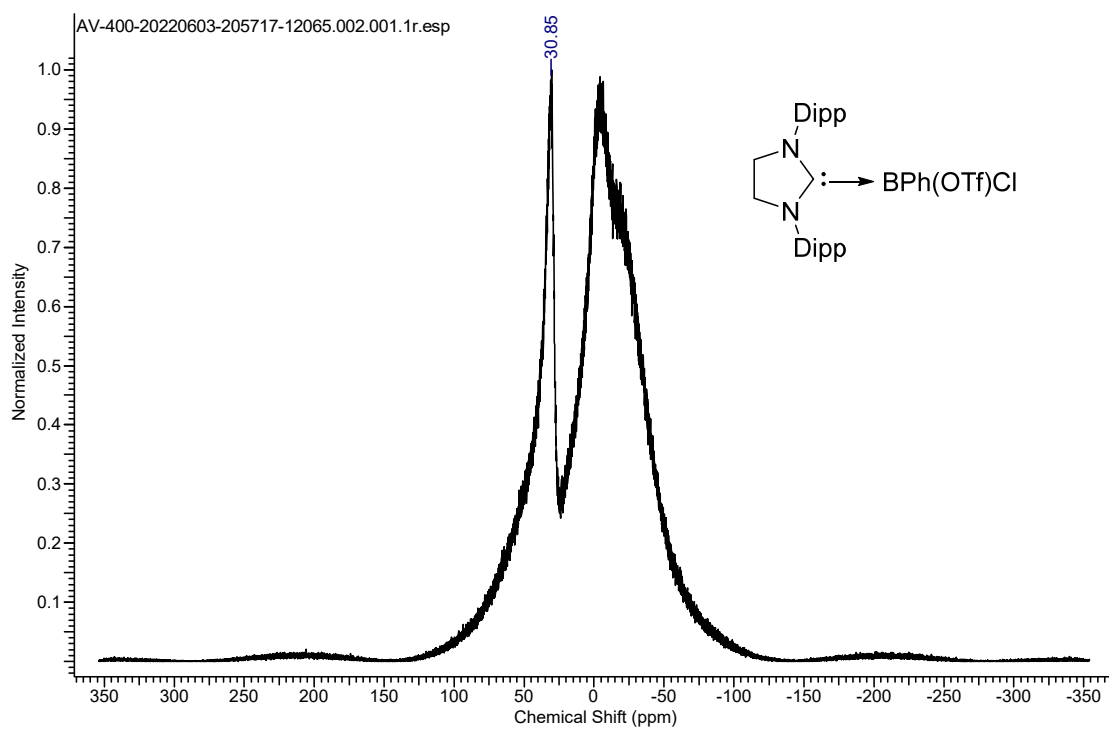

Figure S16.  $^{11}\text{B}$  NMR spectrum of **5b**.

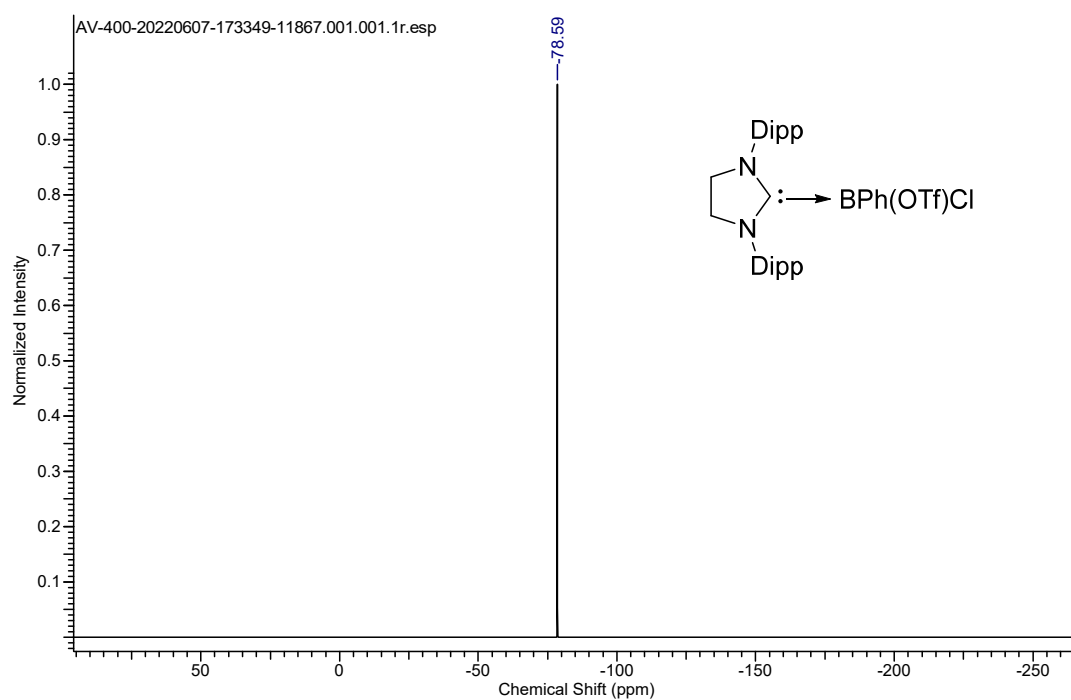

Figure S17.  $^{19}\text{F}$  NMR spectrum of **5b**.

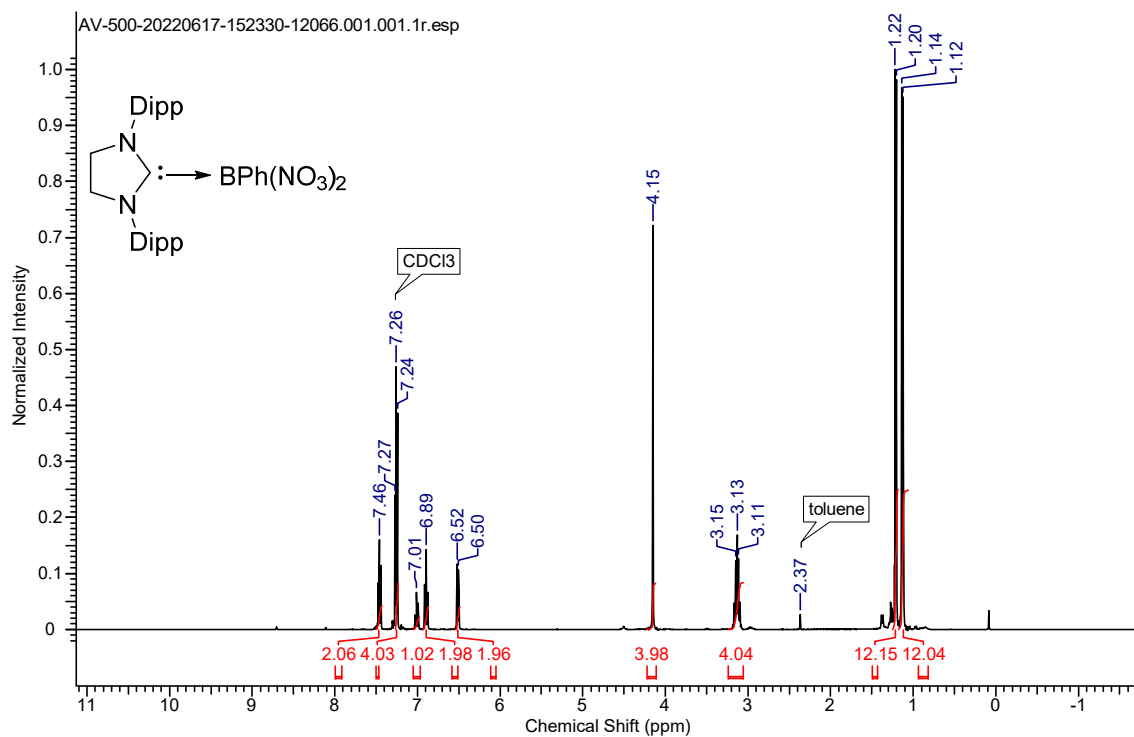

Figure S18.  $^1\text{H}$  NMR spectrum of **6**.

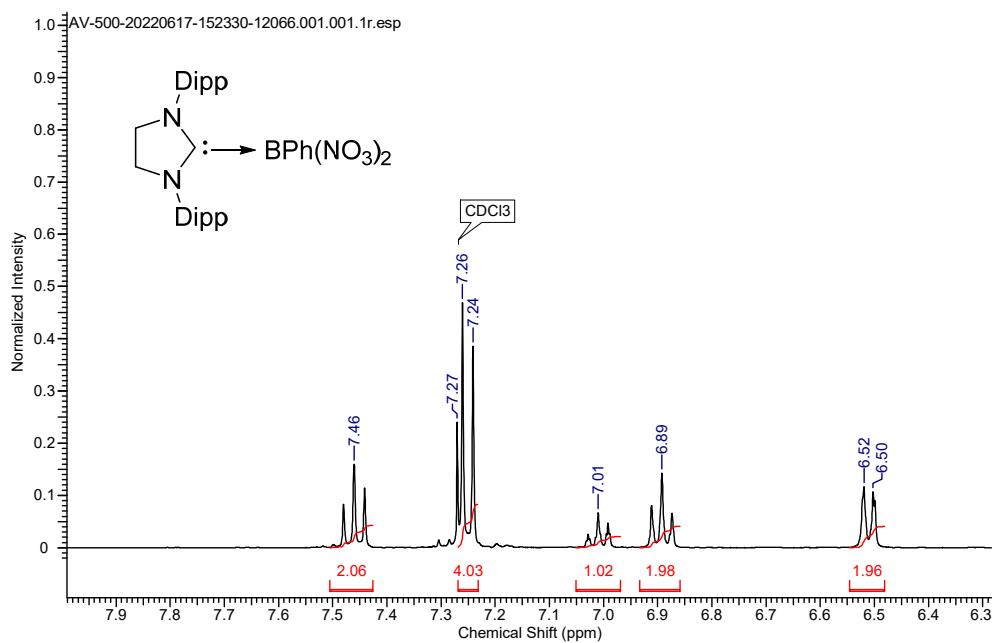

Figure S19. Enlarged version of the aromatic region of <sup>1</sup>H NMR spectrum of **6**.

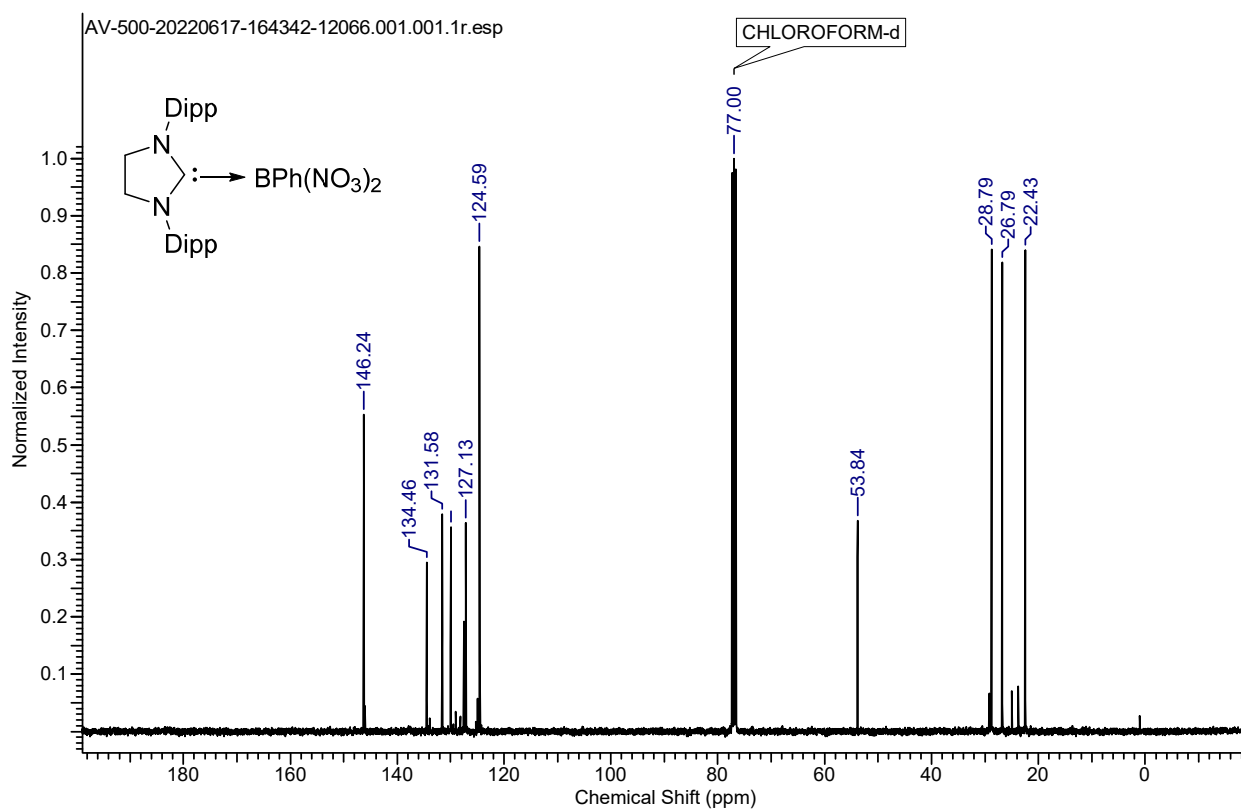

Figure S20. <sup>13</sup>C NMR spectrum of **6**.

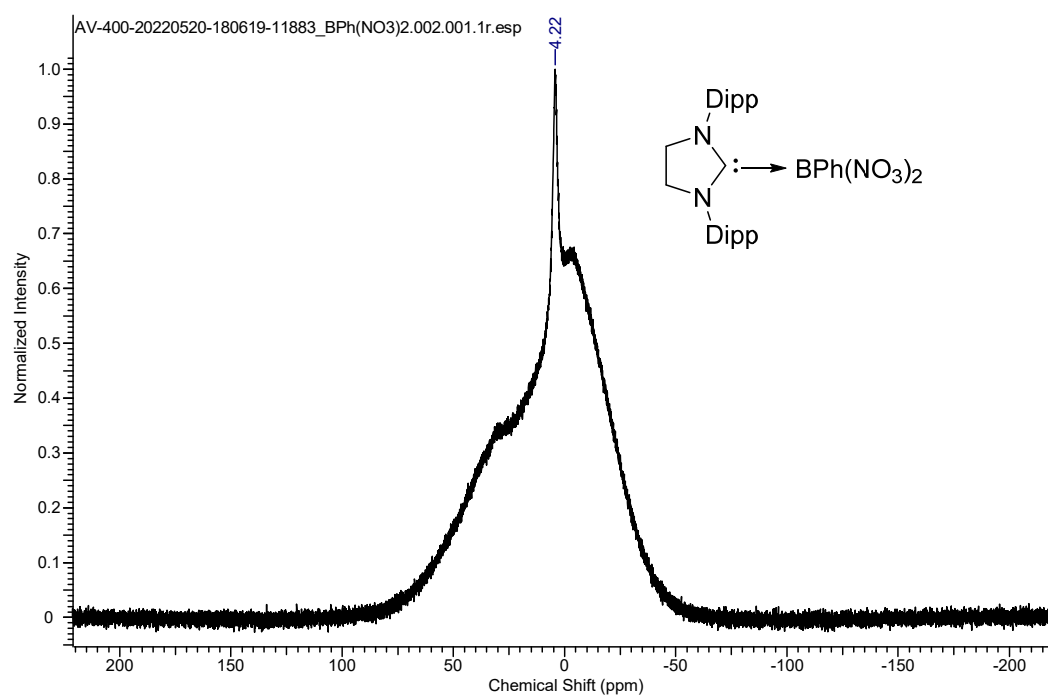

Figure S21. <sup>11</sup>B NMR spectrum of **6**.

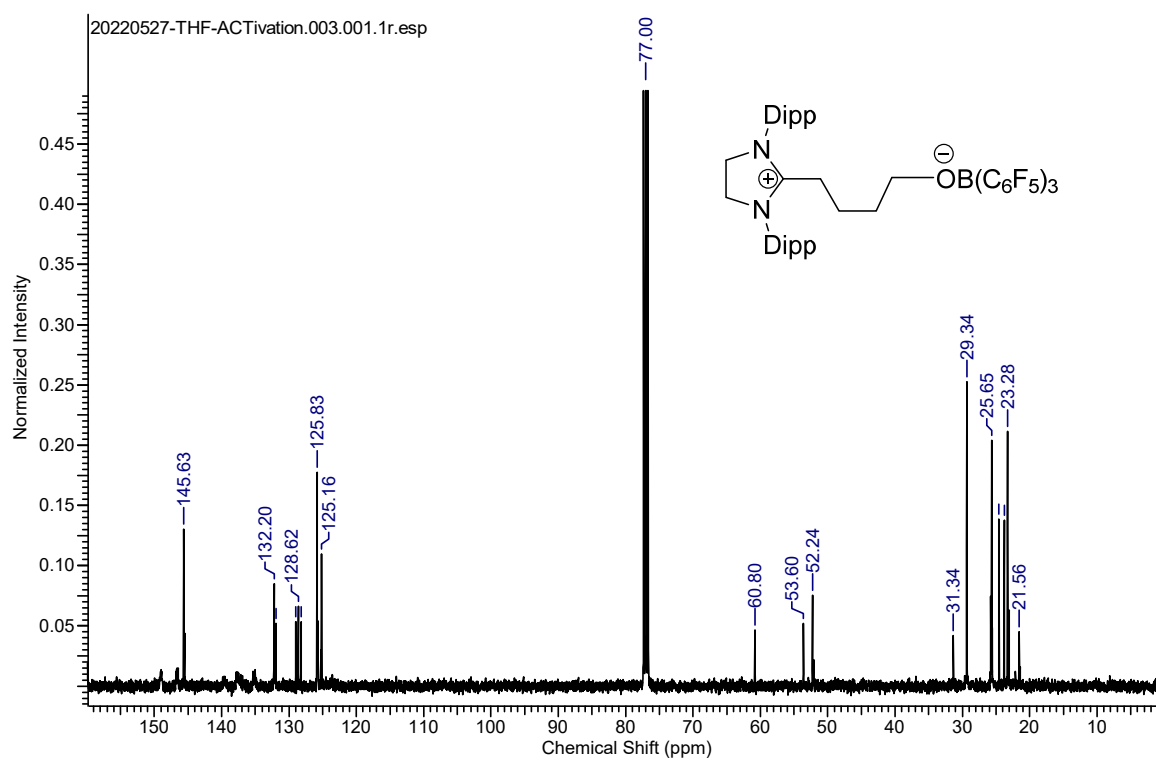

Figure S22. <sup>13</sup>C NMR spectrum of **7**.

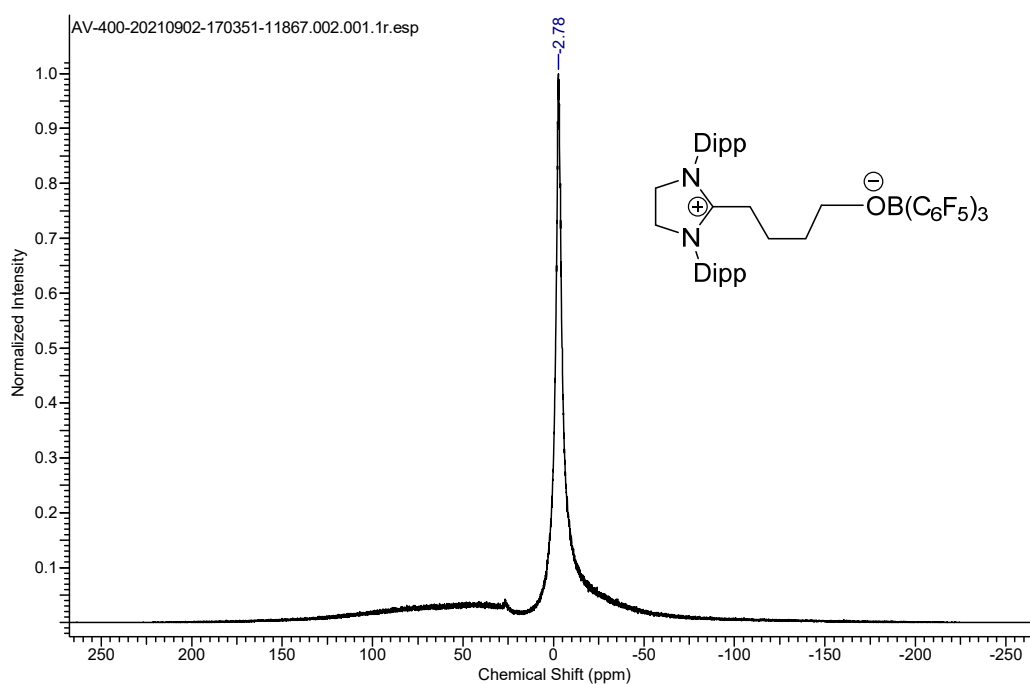

Figure S23.  $^{11}\text{B}$  NMR spectrum of **7**.

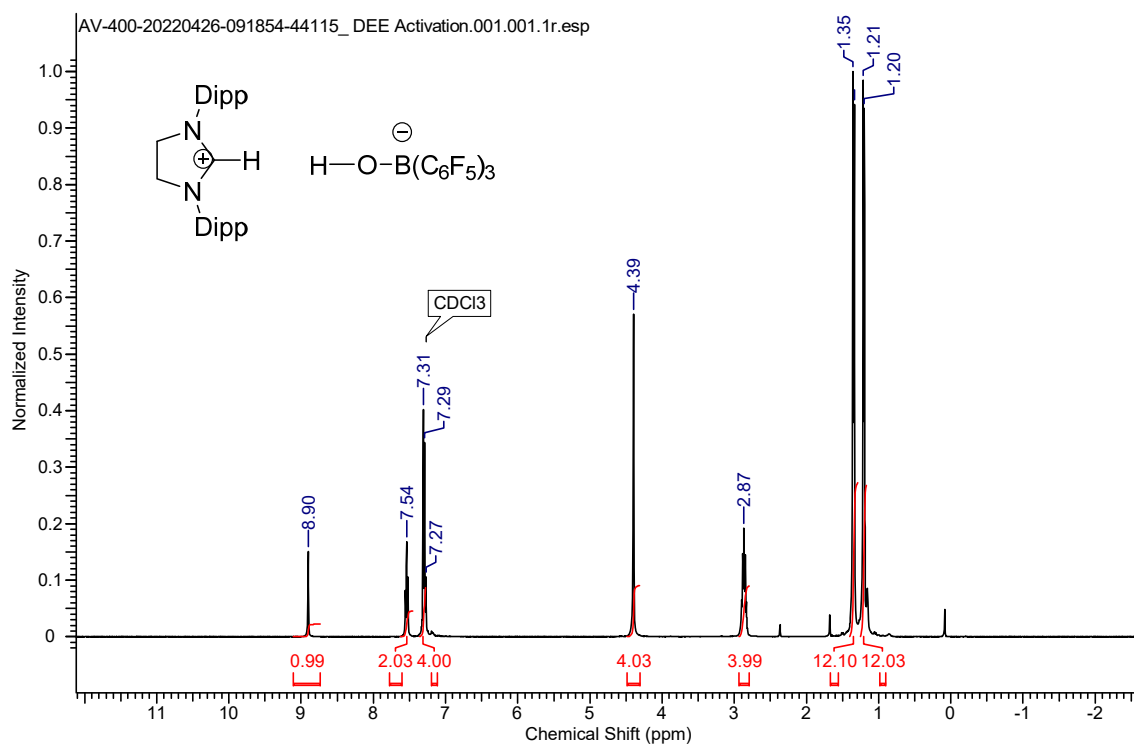

Figure S24.  $^1\text{H}$  NMR spectrum of **8**.

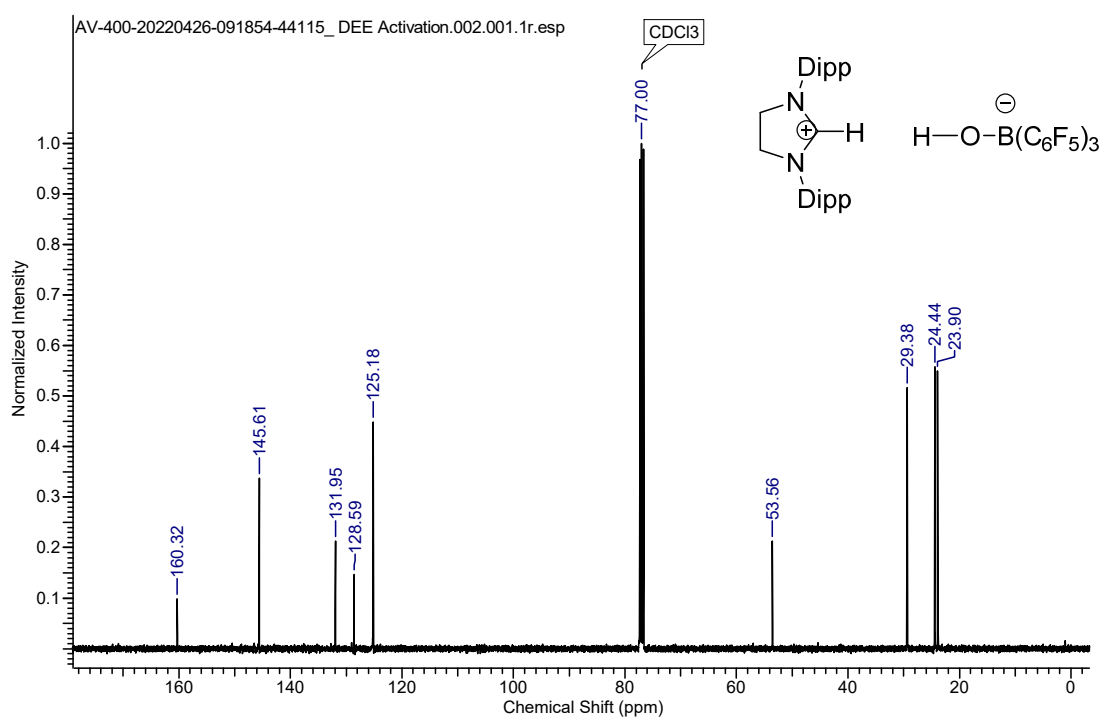

Figure S25. <sup>13</sup>C NMR spectrum of **8**.

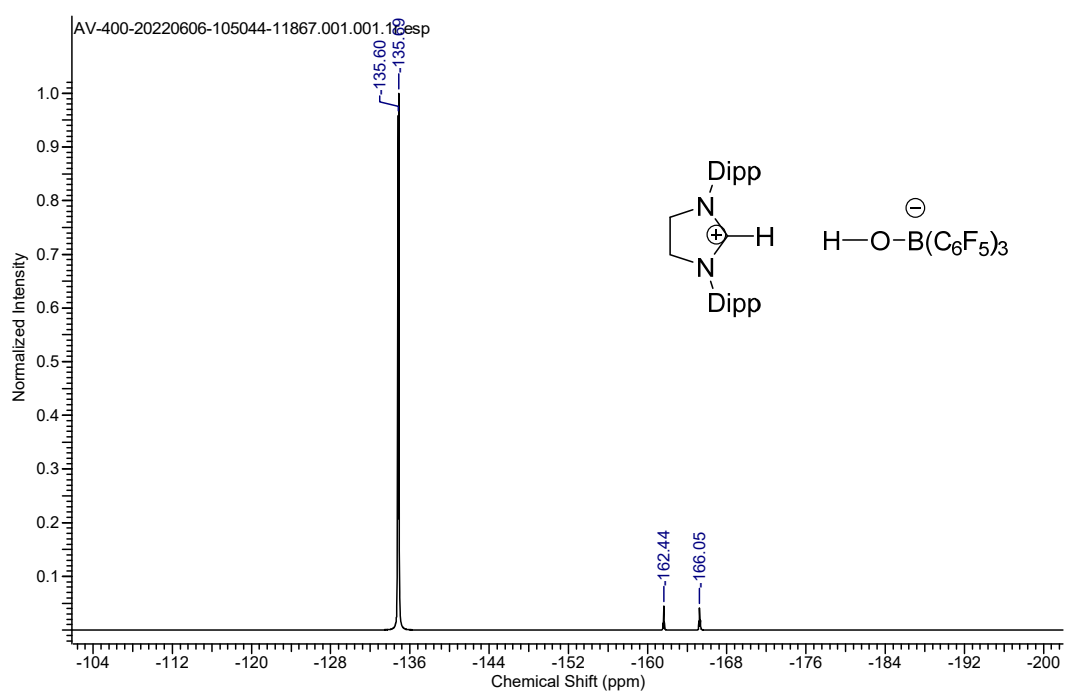

Figure S26. <sup>19</sup>F NMR spectrum of **8**.

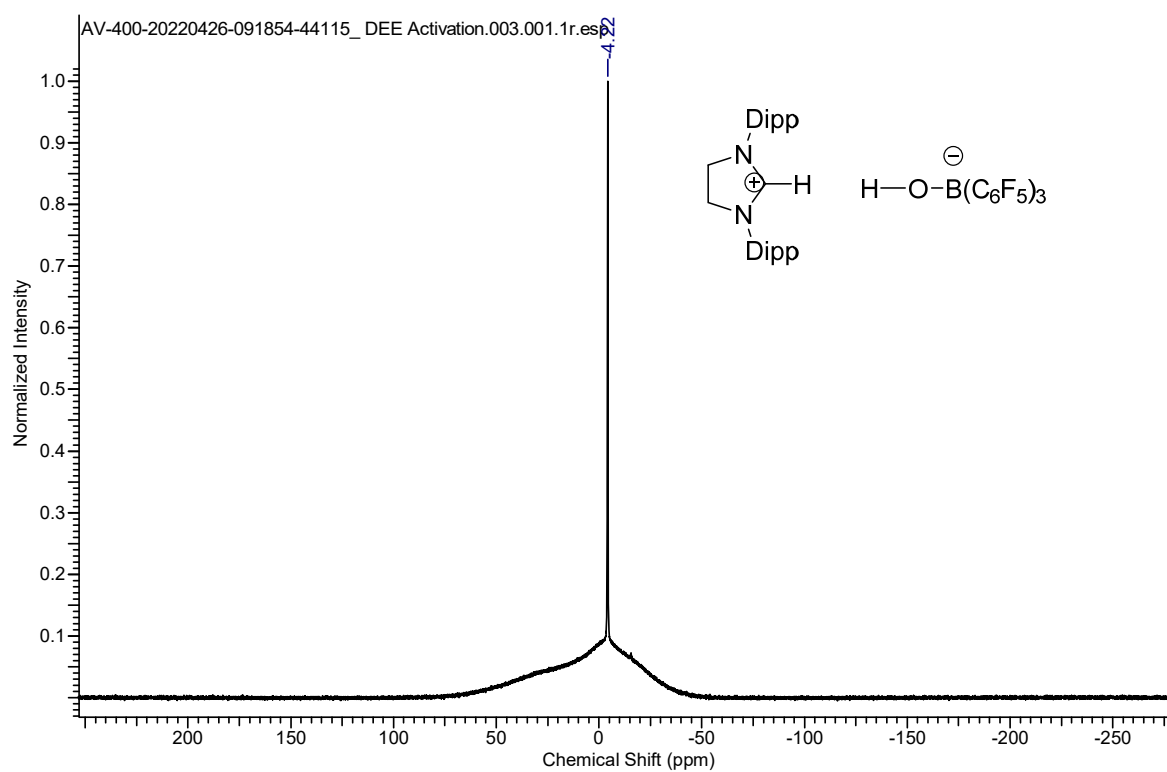

Figure S27. <sup>11</sup>B NMR spectrum of **8**.

## S2. Molecular Structure of **5b**

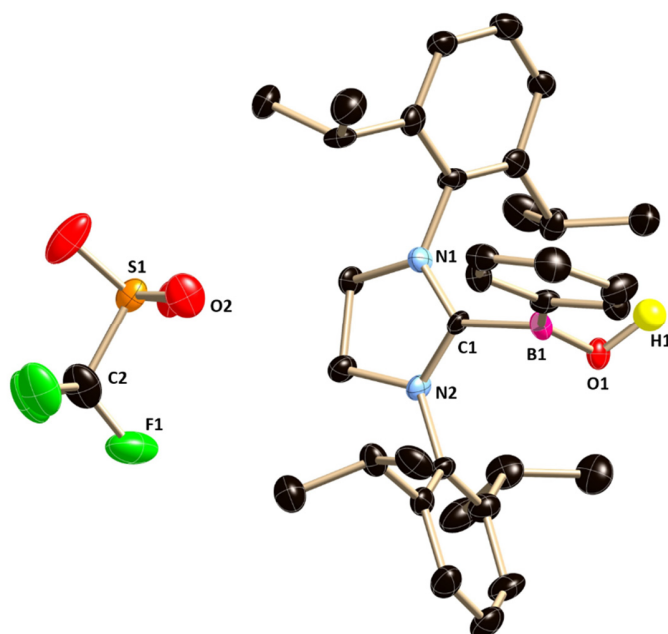

### S3. Crystallographic data for the structural analysis of compounds 1-8

Single crystals of **1-8** were mounted on a Bruker SMART APEX II single crystal X-ray CCD diffractometer having graphite monochromatised (Mo-K $\alpha$  = 0.71073 Å) radiation at low temperature 100 K and 298 K. The X-ray generator was operated at 50 kV and 30 mA. The X-ray data acquisition was monitored by APEX2 program suit. The data were corrected for Lorentz-polarization and absorption effects using SAINT and SADABS programs which are an integral part of APEX2 package.<sup>1,2</sup> The structures were solved by direct methods and refined by full matrix least squares, based on  $F^2$ , using SHELXL Crystal structures were refined using Olex2-1.0 software. Anisotropic refinement was performed for all non-H atom. The C-H hydrogen atoms were calculated using the riding model.<sup>3-5</sup> The structures were examined using the ADSYM subroutine of PLATON to assure that no additional symmetry could be applied to the models. The molecular weight of each structure mentioned herein has been calculated considering the solvent molecules trapped in the crystal. Crystallographic information is available at [www.ccdc.cam.ac.uk/data](http://www.ccdc.cam.ac.uk/data) or as part of Supporting Information.

|                       | <b>1</b>                                                        | <b>2</b>                                                        | <b>3</b>                                                       | <b>4</b>                                                                          |
|-----------------------|-----------------------------------------------------------------|-----------------------------------------------------------------|----------------------------------------------------------------|-----------------------------------------------------------------------------------|
| Empirical formula     | C <sub>39</sub> H <sub>51</sub> BCl <sub>2</sub> N <sub>2</sub> | C <sub>33</sub> H <sub>43</sub> BCl <sub>2</sub> N <sub>2</sub> | C <sub>27</sub> H <sub>42</sub> BN <sub>2</sub> O <sub>3</sub> | C <sub>35</sub> H <sub>47</sub> BClF <sub>3</sub> N <sub>2</sub> O <sub>3</sub> S |
| Formula weight        | 629.53                                                          | 549.40                                                          | 452.43                                                         | 679.06                                                                            |
| Temperature/K         | 100.0                                                           | 100.0                                                           | 296.15                                                         | 100.0                                                                             |
| Crystal system        | monoclinic                                                      | monoclinic                                                      | monoclinic                                                     | monoclinic                                                                        |
| Space group           | $P2_1/n$                                                        | $P2_1/n$                                                        | $P2_1/c$                                                       | $P2_1/n$                                                                          |
| a/Å                   | 12.3193(19)                                                     | 11.8231(7)                                                      | 12.8167(19)                                                    | 12.286(3)                                                                         |
| b/Å                   | 14.797(3)                                                       | 18.7331(11)                                                     | 15.081(2)                                                      | 14.731(3)                                                                         |
| c/Å                   | 20.094(3)                                                       | 14.2604(8)                                                      | 14.264(2)                                                      | 20.644(4)                                                                         |
| $\alpha/^\circ$       | 90                                                              | 90                                                              | 90.00                                                          | 90                                                                                |
| $\beta/^\circ$        | 94.984(5)                                                       | 106.906(2)                                                      | 108.660(3)                                                     | 104.789(9)                                                                        |
| $\gamma/^\circ$       | 90                                                              | 90                                                              | 90.00                                                          | 90                                                                                |
| Volume/Å <sup>3</sup> | 3649.0(10)                                                      | 3021.9(3)                                                       | 2612.1(6)                                                      | 3612.8(13)                                                                        |
| Z                     | 4                                                               | 4                                                               | 4                                                              | 4                                                                                 |

|                                                |                                                                    |                                                                    |                                                                    |                                                                    |
|------------------------------------------------|--------------------------------------------------------------------|--------------------------------------------------------------------|--------------------------------------------------------------------|--------------------------------------------------------------------|
| $\rho_{\text{calc}}/\text{cm}^3$               | 1.146                                                              | 1.208                                                              | 1.153                                                              | 1.248                                                              |
| $\mu/\text{mm}^{-1}$                           | 0.206                                                              | 0.239                                                              | 0.074                                                              | 0.215                                                              |
| F(000)                                         | 1352.0                                                             | 1176.0                                                             | 988.0                                                              | 1440.0                                                             |
| Crystal size/ $\text{mm}^3$                    | $0.14 \times 0.13 \times 0.06$                                     | $0.12 \times 0.12 \times 0.08$                                     | $0.2 \times 0.2 \times 0.2$                                        | $0.15 \times 0.12 \times 0.09$                                     |
| Radiation                                      | MoK $\alpha$ ( $\lambda = 0.71073$ )                               |
| 2 $\theta$ range for data collection/ $^\circ$ | 3.738 to 49.996                                                    | 3.952 to 72.752                                                    | 4.04 to 56.96                                                      | 4.082 to 52.998                                                    |
| Index ranges                                   | $-14 \leq h \leq 14$ , $-17 \leq k \leq 17$ , $-23 \leq l \leq 23$ | $-19 \leq h \leq 19$ , $-31 \leq k \leq 31$ , $-23 \leq l \leq 23$ | $-17 \leq h \leq 17$ , $-20 \leq k \leq 20$ , $-19 \leq l \leq 19$ | $-15 \leq h \leq 15$ , $-18 \leq k \leq 18$ , $-25 \leq l \leq 25$ |
| Reflections collected                          | 156159                                                             | 134803                                                             | 113995                                                             | 53931                                                              |
| Independent reflections                        | 6392 [ $R_{\text{int}} = 0.1716$ , $R_{\text{sigma}} = 0.0535$ ]   | 14650 [ $R_{\text{int}} = 0.0564$ , $R_{\text{sigma}} = 0.0270$ ]  | 6560 [ $R_{\text{int}} = 0.3107$ , $R_{\text{sigma}} = 0.1569$ ]   | 7489 [ $R_{\text{int}} = 0.0481$ , $R_{\text{sigma}} = 0.0288$ ]   |
| Data/restraints/parameters                     | 6392/0/405                                                         | 14650/0/351                                                        | 6560/0/310                                                         | 7489/0/424                                                         |
| Goodness-of-fit on $F^2$                       | 1.151                                                              | 1.107                                                              | 1.043                                                              | 1.058                                                              |
| Final R indexes [ $I \geq 2\sigma(I)$ ]        | $R_1 = 0.0933$ , $wR_2 = 0.2291$                                   | $R_1 = 0.0349$ , $wR_2 = 0.0984$                                   | $R_1 = 0.0985$ , $wR_2 = 0.1721$                                   | $R_1 = 0.0541$ , $wR_2 = 0.1529$                                   |
| Final R indexes [all data]                     | $R_1 = 0.1166$ , $wR_2 = 0.2441$                                   | $R_1 = 0.0424$ , $wR_2 = 0.1074$                                   | $R_1 = 0.2309$ , $wR_2 = 0.2185$                                   | $R_1 = 0.0580$ , $wR_2 = 0.1580$                                   |
| Largest diff. peak/hole / $e \text{ \AA}^{-3}$ | 0.42/-0.52                                                         | 0.61/-0.53                                                         | 0.32/-0.42                                                         | 1.35/-0.84                                                         |
| CCDC No                                        | 2180189                                                            | 2180190                                                            | 2180191                                                            | 2180197                                                            |

| Identification code              | <b>5a</b>                                                             | <b>6</b>                                          | <b>7</b>                                                     | <b>8</b>                                                     |
|----------------------------------|-----------------------------------------------------------------------|---------------------------------------------------|--------------------------------------------------------------|--------------------------------------------------------------|
| Empirical formula                | $\text{C}_{41}\text{H}_{51}\text{BClF}_3\text{N}_2\text{O}_3\text{S}$ | $\text{C}_{33}\text{H}_{43}\text{BN}_4\text{O}_6$ | $\text{C}_{52}\text{H}_{49}\text{BF}_{15}\text{N}_2\text{O}$ | $\text{C}_{45}\text{H}_{40}\text{BF}_{15}\text{N}_2\text{O}$ |
| Formula weight                   | 755.15                                                                | 602.52                                            | 1013.74                                                      | 920.60                                                       |
| Temperature/K                    | 100.0                                                                 | 160.0                                             | 100.0                                                        | 100.0                                                        |
| Crystal system                   | monoclinic                                                            | monoclinic                                        | triclinic                                                    | monoclinic                                                   |
| Space group                      | $P2_1/n$                                                              | $P2_1/c$                                          | $P-1$                                                        | $P2_1/n$                                                     |
| $a/\text{\AA}$                   | 16.0556(5)                                                            | 10.1256(5)                                        | 9.4393(13)                                                   | 10.0450(7)                                                   |
| $b/\text{\AA}$                   | 22.2837(7)                                                            | 16.8204(13)                                       | 14.568(2)                                                    | 22.3914(17)                                                  |
| $c/\text{\AA}$                   | 23.3059(7)                                                            | 18.9207(16)                                       | 17.814(3)                                                    | 18.9077(15)                                                  |
| $\alpha/^\circ$                  | 90                                                                    | 90                                                | 97.195(6)                                                    | 90                                                           |
| $\beta/^\circ$                   | 107.6690(10)                                                          | 98.178(2)                                         | 97.145(5)                                                    | 90.037(3)                                                    |
| $\gamma/^\circ$                  | 90                                                                    | 90                                                | 99.872(5)                                                    | 90                                                           |
| Volume/ $\text{\AA}^3$           | 7945.0(4)                                                             | 3189.7(4)                                         | 2367.6(6)                                                    | 4252.7(6)                                                    |
| Z                                | 8                                                                     | 4                                                 | 2                                                            | 4                                                            |
| $\rho_{\text{calc}}/\text{cm}^3$ | 1.263                                                                 | 1.255                                             | 1.422                                                        | 1.438                                                        |
| $\mu/\text{mm}^{-1}$             | 0.203                                                                 | 0.086                                             | 0.125                                                        | 0.131                                                        |
| F(000)                           | 3200.0                                                                | 1288.0                                            | 1046.0                                                       | 1888.0                                                       |

|                                             |                                                                |                                                               |                                                                |                                                                |
|---------------------------------------------|----------------------------------------------------------------|---------------------------------------------------------------|----------------------------------------------------------------|----------------------------------------------------------------|
| Crystal size/mm <sup>3</sup>                | 0.26 × 0.22 × 0.2                                              | 0.19 × 0.12 × 0.08                                            | 0.3 × 0.15 × 0.1                                               | 0.26 × 0.12 × 0.08                                             |
| Radiation                                   | MoK $\alpha$ ( $\lambda$ = 0.71073)                            | MoK $\alpha$ ( $\lambda$ = 0.71073)                           | MoK $\alpha$ ( $\lambda$ = 0.71073)                            | MoK $\alpha$ ( $\lambda$ = 0.71073)                            |
| 2 $\Theta$ range for data collection/°      | 4.094 to 49.998                                                | 4.35 to 59.156                                                | 4.43 to 62.2                                                   | 4.228 to 66.4                                                  |
| Index ranges                                | -19 ≤ h ≤ 19, -26 ≤ k ≤ 26, -27 ≤ l ≤ 27                       | -13 ≤ h ≤ 13, -21 ≤ k ≤ 21, -25 ≤ l ≤ 26                      | -13 ≤ h ≤ 13, -21 ≤ k ≤ 21, -25 ≤ l ≤ 25                       | -15 ≤ h ≤ 15, -34 ≤ k ≤ 34, -29 ≤ l ≤ 29                       |
| Reflections collected                       | 196375                                                         | 21918                                                         | 155747                                                         | 334120                                                         |
| Independent reflections                     | 13881 [R <sub>int</sub> = 0.0508, R <sub>sigma</sub> = 0.0187] | 7552 [R <sub>int</sub> = 0.1113, R <sub>sigma</sub> = 0.1409] | 15134 [R <sub>int</sub> = 0.0813, R <sub>sigma</sub> = 0.0392] | 16241 [R <sub>int</sub> = 0.0606, R <sub>sigma</sub> = 0.0200] |
| Data/restraints/parameters                  | 13881/0/975                                                    | 7552/0/405                                                    | 15134/0/648                                                    | 16241/0/589                                                    |
| Goodness-of-fit on F <sup>2</sup>           | 1.136                                                          | 0.995                                                         | 1.090                                                          | 1.166                                                          |
| Final R indexes [I>=2 $\sigma$ (I)]         | R <sub>1</sub> = 0.0463, wR <sub>2</sub> = 0.1329              | R <sub>1</sub> = 0.0693, wR <sub>2</sub> = 0.1688             | R <sub>1</sub> = 0.0572, wR <sub>2</sub> = 0.1425              | R <sub>1</sub> = 0.0478, wR <sub>2</sub> = 0.1324              |
| Final R indexes [all data]                  | R <sub>1</sub> = 0.0508, wR <sub>2</sub> = 0.1386              | R <sub>1</sub> = 0.1607, wR <sub>2</sub> = 0.2175             | R <sub>1</sub> = 0.0841, wR <sub>2</sub> = 0.1643              | R <sub>1</sub> = 0.0573, wR <sub>2</sub> = 0.1463              |
| Largest diff. peak/hole / e Å <sup>-3</sup> | 1.11/-0.43                                                     | 0.51/-0.76                                                    | 0.53/-0.54                                                     | 0.56/-0.54                                                     |
| CCDC No:                                    | 2180198                                                        | 2180199                                                       | 2180200                                                        | 2180457                                                        |

#### S4. References

1. APEX3, SAINT-Plus and SADABS; Bruker AXS Inc.: Madison, WI, USA, 2006.
2. Apex CCD and SAINT v8.30C; Bruker AXS Inc.: Madison, WI, USA, 2013.
3. Sheldrick, G.M. A short history of SHELX. *Acta Crystallogr.* **2008**, A64, 112–122.
4. Krause, L.; Herbst-Irmer, R.; Sheldrick, G.M.; Stalke, D. Comparison of silver and molybdenum microfocus X-ray sources for single-crystal structure determination. *J. Appl. Crystallogr.* **2015**, 48, 3–10.
5. Krause, L.; Herbst-Irmer, R.; Stalke, D. An empirical correction for the influence of low-energy contamination. *J. Appl. Crystallogr.* **2015**, 48, 1907–1913.
