# Supplementary material for: Nucleophilic Substitution at a Coordinatively Saturated Five-Membered NHC∙Haloborane Centre
Source: MDPI journal article supplement (doi:10.3390/inorganics10070097), 2022-07-07
Supplement: s1 [file s1]

Archive with 17 entries (17 files):
- checkcif_1.pdf
- checkcif_2.pdf
- checkcif_3.pdf
- checkcif_4.pdf
- checkcif_5a.pdf
- checkcif_6.pdf
- Checkcif_7.pdf
- checkcif_8.pdf
- cif_1.cif
- cif_2.cif
- Cif_3.cif
- Cif_4.cif
- Cif_5a.cif
- Cif_6.cif
- Cif_7.cif
- Cif_8.cif
- Supporting Information_Inorganics.pdf
