# Supplementary material for: Nucleophilic Substitution at a Coordinatively Saturated Five-Membered NHC∙Haloborane Centre
Source: MDPI journal article supplement (doi:10.3390/inorganics10070097), 2022-07-07
Supplement: s1 [file s1 › cif_1.cif]

data_mo_gk_12112021_0m_a
_audit_creation_date               2022-06-05
_audit_creation_method
;
Olex2 1.5
(compiled 2021.08.20 svn.r13c46975 for OlexSys, GUI svn.r6405)
;
_shelx_SHELXL_version_number       '2018/3'
_audit_contact_author_address      ?
_audit_contact_author_email        ?
_audit_contact_author_name         ''
_audit_contact_author_phone        ?
_publ_contact_author_id_orcid      ?
_publ_section_references
;
Dolomanov, O.V., Bourhis, L.J., Gildea, R.J, Howard, J.A.K. & Puschmann, H.
 (2009), J. Appl. Cryst. 42, 339-341.

Sheldrick, G.M. (2015). Acta Cryst. C71, 3-8.
;
_chemical_name_common              ?
_chemical_name_systematic          ?
_chemical_formula_moiety           'C27 H39 B Cl2 N2, 2(C6 H6)'
_chemical_formula_sum              'C39 H51 B Cl2 N2'
_chemical_formula_weight           629.53
_chemical_melting_point            ?
loop_
  _atom_type_symbol
  _atom_type_description
  _atom_type_scat_dispersion_real
  _atom_type_scat_dispersion_imag
  _atom_type_scat_source
 'C' 'C' 0.0033 0.0016 'International Tables Vol C Tables 4.2.6.8 and 6.1.1.4'
 'H' 'H' 0.0000 0.0000 'International Tables Vol C Tables 4.2.6.8 and 6.1.1.4'
 'B' 'B' 0.0013 0.0007 'International Tables Vol C Tables 4.2.6.8 and 6.1.1.4'
 'Cl' 'Cl' 0.1484 0.1585 'International Tables Vol C Tables 4.2.6.8 and 6.1.1.4'
 'N' 'N' 0.0061 0.0033 'International Tables Vol C Tables 4.2.6.8 and 6.1.1.4'

_shelx_space_group_comment
;
The symmetry employed for this shelxl refinement is uniquely defined
by the following loop, which should always be used as a source of
symmetry information in preference to the above space-group names.
They are only intended as comments.
;
_space_group_crystal_system        'monoclinic'
_space_group_IT_number             14
_space_group_name_H-M_alt          'P 1 21/n 1'
_space_group_name_Hall             '-P 2yn'
loop_
  _space_group_symop_operation_xyz
 'x, y, z'
 '-x+1/2, y+1/2, -z+1/2'
 '-x, -y, -z'
 'x-1/2, -y-1/2, z-1/2'

_cell_length_a                     12.3193(19)
_cell_length_b                     14.797(3)
_cell_length_c                     20.094(3)
_cell_angle_alpha                  90
_cell_angle_beta                   94.984(5)
_cell_angle_gamma                  90
_cell_volume                       3649.0(10)
_cell_formula_units_Z              4
_cell_measurement_reflns_used      9962
_cell_measurement_temperature      100(2)
_cell_measurement_theta_max        28.22
_cell_measurement_theta_min        2.44
_shelx_estimated_absorpt_T_max     0.988
_shelx_estimated_absorpt_T_min     0.972
_exptl_absorpt_coefficient_mu      0.206
_exptl_absorpt_correction_T_max    0.7457
_exptl_absorpt_correction_T_min    0.6292
_exptl_absorpt_correction_type     multi-scan
_exptl_absorpt_process_details    
 'SADABS-2016/2 (Bruker,2016/2) was used for absorption correction. wR2(int) was 0.1573 before and 0.0960 after correction. The Ratio of minimum to maximum transmission is 0.8438. The \l/2 correction factor is Not present.'
_exptl_absorpt_special_details     ?
_exptl_crystal_colour              colourless
_exptl_crystal_colour_primary      colourless
_exptl_crystal_density_diffrn      1.146
_exptl_crystal_density_meas        ?
_exptl_crystal_density_method      ?
_exptl_crystal_description         block
_exptl_crystal_F_000               1352
_exptl_crystal_size_max            0.14
_exptl_crystal_size_mid            0.13
_exptl_crystal_size_min            0.06
_exptl_transmission_factor_max     ?
_exptl_transmission_factor_min     ?
_diffrn_reflns_av_R_equivalents    0.1716
_diffrn_reflns_av_unetI/netI       0.0535
_diffrn_reflns_Laue_measured_fraction_full  0.995
_diffrn_reflns_Laue_measured_fraction_max  0.995
_diffrn_reflns_limit_h_max         14
_diffrn_reflns_limit_h_min         -14
_diffrn_reflns_limit_k_max         17
_diffrn_reflns_limit_k_min         -17
_diffrn_reflns_limit_l_max         23
_diffrn_reflns_limit_l_min         -23
_diffrn_reflns_number              156159
_diffrn_reflns_point_group_measured_fraction_full  0.995
_diffrn_reflns_point_group_measured_fraction_max  0.995
_diffrn_reflns_theta_full          24.998
_diffrn_reflns_theta_max           24.998
_diffrn_reflns_theta_min           1.869
_diffrn_ambient_temperature        100.0
_diffrn_detector_area_resol_mean   ?
_diffrn_measured_fraction_theta_full  0.995
_diffrn_measured_fraction_theta_max  0.995
_diffrn_measurement_device_type    'Bruker D8 VENTURE Kappa Duo PHOTON II CPAD'
_diffrn_measurement_method         '\f and \w scans'
_diffrn_radiation_type             MoK\a
_diffrn_radiation_wavelength       0.71073
_diffrn_source                     ?
_diffrn_standards_number           0
_reflns_Friedel_coverage           0.000
_reflns_Friedel_fraction_full      .
_reflns_Friedel_fraction_max       .
_reflns_number_gt                  5083
_reflns_number_total               6392
_reflns_special_details
;
 Reflections were merged by SHELXL according to the crystal
 class for the calculation of statistics and refinement.
 
 _reflns_Friedel_fraction is defined as the number of unique
 Friedel pairs measured divided by the number that would be
 possible theoretically, ignoring centric projections and
 systematic absences.
;
_reflns_threshold_expression       'I > 2\s(I)'
_computing_cell_refinement         ?
_computing_data_collection         ?
_computing_data_reduction          ?
_computing_molecular_graphics      'Olex2 1.5 (Dolomanov et al., 2009)'
_computing_publication_material    'Olex2 1.5 (Dolomanov et al., 2009)'
_computing_structure_refinement    'ShelXL (Sheldrick, 2015)'
_computing_structure_solution      'SHELXT 2014/5 (Sheldrick, 2014)'
_refine_diff_density_max           0.419
_refine_diff_density_min           -0.517
_refine_diff_density_rms           0.099
_refine_ls_extinction_coef         .
_refine_ls_extinction_method       none
_refine_ls_goodness_of_fit_ref     1.151
_refine_ls_hydrogen_treatment      constr
_refine_ls_matrix_type             full
_refine_ls_number_parameters       405
_refine_ls_number_reflns           6392
_refine_ls_number_restraints       0
_refine_ls_R_factor_all            0.1166
_refine_ls_R_factor_gt             0.0933
_refine_ls_restrained_S_all        1.151
_refine_ls_shift/su_max            0.000
_refine_ls_shift/su_mean           0.000
_refine_ls_structure_factor_coef   Fsqd
_refine_ls_weighting_details      
 'w=1/[\s^2^(Fo^2^)+(0.0894P)^2^+11.8128P] where P=(Fo^2^+2Fc^2^)/3'
_refine_ls_weighting_scheme        calc
_refine_ls_wR_factor_gt            0.2291
_refine_ls_wR_factor_ref           0.2441
_refine_special_details            ?
_olex2_refinement_description
;
1.a Ternary CH refined with riding coordinates:
 C2(H2), C8(H8), C14(H14), C18(H18), B1(H1)
1.b Secondary CH2 refined with riding coordinates:
 C25(H25A,H25B), C26(H26A,H26B)
1.c Aromatic/amide H refined with riding coordinates:
 C10(H10), C11(H11), C13(H13), C21(H21), C22(H22), C23(H23), C28(H28),
 C29(H29), C30(H30), C31(H31), C32(H32), C33(H33), C34(H34), C35(H35), C36(H36),
  C37(H37), C38(H38), C39(H39)
1.d Idealised Me refined as rotating group:
 C1(H1A,H1B,H1C), C9(H9A,H9B,H9C), C15(H15A,H15B,H15C), C16(H16A,H16B,H16C),
 C19(H19A,H19B,H19C), C20(H20A,H20B,H20C), C24(H24A,H24B,H24C), C27(H27A,H27B,
 H27C)
;
_atom_sites_solution_hydrogens     geom
_atom_sites_solution_primary       ?
_atom_sites_solution_secondary     ?
loop_
  _atom_site_label
  _atom_site_type_symbol
  _atom_site_fract_x
  _atom_site_fract_y
  _atom_site_fract_z
  _atom_site_U_iso_or_equiv
  _atom_site_adp_type
  _atom_site_occupancy
  _atom_site_site_symmetry_order
  _atom_site_calc_flag
  _atom_site_refinement_flags_posn
  _atom_site_refinement_flags_adp
  _atom_site_refinement_flags_occupancy
  _atom_site_disorder_assembly
  _atom_site_disorder_group
 Cl1 Cl 0.39029(10) 0.34125(8) 0.24838(6) 0.0307(3) Uani 1 1 d . . . . .
 Cl2 Cl 0.20128(10) 0.33737(9) 0.13900(6) 0.0360(3) Uani 1 1 d . . . . .
 N1 N 0.2265(3) 0.5236(2) 0.25135(17) 0.0203(8) Uani 1 1 d . . . . .
 N2 N 0.3051(3) 0.5773(3) 0.16712(18) 0.0231(8) Uani 1 1 d . . . . .
 C1 C -0.0728(4) 0.5234(4) 0.2399(3) 0.0383(13) Uani 1 1 d . . . . .
 H1A H -0.121872 0.500531 0.271829 0.057 Uiso 1 1 calc GR . . . .
 H1B H -0.115460 0.541887 0.198684 0.057 Uiso 1 1 calc GR . . . .
 H1C H -0.032206 0.575425 0.259220 0.057 Uiso 1 1 calc GR . . . .
 C2 C 0.0076(4) 0.4485(3) 0.2239(2) 0.0273(10) Uani 1 1 d . . . . .
 H2 H 0.054290 0.472347 0.189582 0.033 Uiso 1 1 calc R . . . .
 C3 C 0.0814(4) 0.4251(3) 0.2862(2) 0.0224(10) Uani 1 1 d . . . . .
 C4 C 0.1844(4) 0.4631(3) 0.2997(2) 0.0227(10) Uani 1 1 d . . . . .
 C5 C 0.2828(3) 0.5023(3) 0.1996(2) 0.0210(9) Uani 1 1 d . . . . .
 C6 C 0.3724(4) 0.5872(3) 0.1120(2) 0.0250(10) Uani 1 1 d . . . . .
 C7 C 0.3208(4) 0.6048(3) 0.0490(2) 0.0278(11) Uani 1 1 d . . . . .
 C8 C 0.1978(4) 0.5993(4) 0.0334(2) 0.0349(12) Uani 1 1 d . . . . .
 H8 H 0.164649 0.588221 0.076355 0.042 Uiso 1 1 calc R . . . .
 C9 C 0.1500(4) 0.6869(4) 0.0036(3) 0.0396(13) Uani 1 1 d . . . . .
 H9A H 0.161771 0.735721 0.036413 0.059 Uiso 1 1 calc GR . . . .
 H9B H 0.071648 0.679132 -0.008095 0.059 Uiso 1 1 calc GR . . . .
 H9C H 0.185785 0.702177 -0.036590 0.059 Uiso 1 1 calc GR . . . .
 C10 C 0.4986(5) 0.6246(4) 0.0094(3) 0.0415(14) Uani 1 1 d . . . . .
 H10 H 0.542191 0.638134 -0.026045 0.050 Uiso 1 1 calc R . . . .
 C11 C 0.3871(5) 0.6247(4) -0.0022(2) 0.0367(12) Uani 1 1 d . . . . .
 H11 H 0.354556 0.638484 -0.045619 0.044 Uiso 1 1 calc R . . . .
 C12 C 0.4860(4) 0.5852(3) 0.1247(2) 0.0289(11) Uani 1 1 d . . . . .
 C13 C 0.5476(4) 0.6053(4) 0.0718(3) 0.0387(13) Uani 1 1 d . . . . .
 H13 H 0.624859 0.605567 0.078865 0.046 Uiso 1 1 calc R . . . .
 C14 C 0.5417(4) 0.5615(3) 0.1926(3) 0.0346(12) Uani 1 1 d . . . . .
 H14 H 0.485428 0.536839 0.220691 0.042 Uiso 1 1 calc R . . . .
 C15 C 0.5915(10) 0.6454(5) 0.2270(5) 0.128(5) Uani 1 1 d . . . . .
 H15A H 0.632613 0.679132 0.195637 0.191 Uiso 1 1 calc GR . . . .
 H15B H 0.640463 0.627191 0.265748 0.191 Uiso 1 1 calc GR . . . .
 H15C H 0.533315 0.683670 0.241861 0.191 Uiso 1 1 calc GR . . . .
 C16 C 0.6292(5) 0.4891(6) 0.1872(4) 0.068(2) Uani 1 1 d . . . . .
 H16A H 0.596172 0.435173 0.165663 0.101 Uiso 1 1 calc GR . . . .
 H16B H 0.661482 0.473489 0.232036 0.101 Uiso 1 1 calc GR . . . .
 H16C H 0.685968 0.512440 0.160563 0.101 Uiso 1 1 calc GR . . . .
 C17 C 0.2466(4) 0.4506(3) 0.3609(2) 0.0236(10) Uani 1 1 d . . . . .
 C18 C 0.3557(4) 0.4982(4) 0.3786(2) 0.0320(11) Uani 1 1 d . . . . .
 H18 H 0.382210 0.522647 0.336477 0.038 Uiso 1 1 calc R . . . .
 C19 C 0.3400(5) 0.5780(4) 0.4260(3) 0.0422(13) Uani 1 1 d . . . . .
 H19A H 0.283916 0.618686 0.405544 0.063 Uiso 1 1 calc GR . . . .
 H19B H 0.408854 0.610934 0.434276 0.063 Uiso 1 1 calc GR . . . .
 H19C H 0.317296 0.555007 0.468383 0.063 Uiso 1 1 calc GR . . . .
 C20 C 0.4439(4) 0.4346(4) 0.4116(3) 0.0455(14) Uani 1 1 d . . . . .
 H20A H 0.423250 0.415736 0.455514 0.068 Uiso 1 1 calc GR . . . .
 H20B H 0.513854 0.466496 0.416940 0.068 Uiso 1 1 calc GR . . . .
 H20C H 0.450593 0.381294 0.383344 0.068 Uiso 1 1 calc GR . . . .
 C21 C 0.2028(4) 0.3952(3) 0.4080(2) 0.0296(11) Uani 1 1 d . . . . .
 H21 H 0.242387 0.386161 0.450169 0.036 Uiso 1 1 calc R . . . .
 C22 C 0.1030(4) 0.3532(3) 0.3947(2) 0.0304(11) Uani 1 1 d . . . . .
 H22 H 0.075656 0.314342 0.426914 0.037 Uiso 1 1 calc R . . . .
 C23 C 0.0435(4) 0.3679(3) 0.3348(2) 0.0279(11) Uani 1 1 d . . . . .
 H23 H -0.024850 0.338665 0.325930 0.034 Uiso 1 1 calc R . . . .
 C24 C -0.0565(4) 0.3674(4) 0.1937(3) 0.0392(13) Uani 1 1 d . . . . .
 H24A H -0.006406 0.317018 0.188164 0.059 Uiso 1 1 calc GR . . . .
 H24B H -0.092483 0.384265 0.150011 0.059 Uiso 1 1 calc GR . . . .
 H24C H -0.111430 0.349122 0.223429 0.059 Uiso 1 1 calc GR . . . .
 C25 C 0.2069(4) 0.6228(3) 0.2554(2) 0.0271(10) Uani 1 1 d . . . . .
 H25A H 0.238150 0.647581 0.298687 0.033 Uiso 1 1 calc R . . . .
 H25B H 0.128074 0.636773 0.249707 0.033 Uiso 1 1 calc R . . . .
 C26 C 0.2649(5) 0.6598(4) 0.1983(2) 0.0374(13) Uani 1 1 d . . . . .
 H26A H 0.214172 0.693750 0.166533 0.045 Uiso 1 1 calc R . . . .
 H26B H 0.325832 0.699877 0.214605 0.045 Uiso 1 1 calc R . . . .
 C27 C 0.1695(5) 0.5191(4) -0.0124(3) 0.0476(14) Uani 1 1 d . . . . .
 H27A H 0.203817 0.526878 -0.054218 0.071 Uiso 1 1 calc GR . . . .
 H27B H 0.090263 0.515513 -0.022020 0.071 Uiso 1 1 calc GR . . . .
 H27C H 0.196216 0.463293 0.009634 0.071 Uiso 1 1 calc GR . . . .
 C28 C 0.5176(5) 0.8200(4) -0.1139(3) 0.0432(14) Uani 1 1 d . . . . .
 H28 H 0.587571 0.795226 -0.118761 0.052 Uiso 1 1 calc R . . . .
 C29 C 0.4273(5) 0.7766(4) -0.1397(3) 0.0447(14) Uani 1 1 d . . . . .
 H29 H 0.435015 0.720898 -0.162288 0.054 Uiso 1 1 calc R . . . .
 C30 C 0.3262(5) 0.8097(5) -0.1344(3) 0.0495(16) Uani 1 1 d . . . . .
 H30 H 0.263918 0.777800 -0.153130 0.059 Uiso 1 1 calc R . . . .
 C31 C 0.3144(5) 0.8927(5) -0.1006(3) 0.0527(17) Uani 1 1 d . . . . .
 H31 H 0.244386 0.917609 -0.095901 0.063 Uiso 1 1 calc R . . . .
 C32 C 0.4085(5) 0.9365(4) -0.0745(3) 0.0489(15) Uani 1 1 d . . . . .
 H32 H 0.403209 0.992602 -0.052012 0.059 Uiso 1 1 calc R . . . .
 C33 C 0.5078(5) 0.8996(4) -0.0810(3) 0.0442(14) Uani 1 1 d . . . . .
 H33 H 0.571393 0.929645 -0.062289 0.053 Uiso 1 1 calc R . . . .
 C34 C 0.2210(6) 0.6892(5) 0.5701(3) 0.0587(18) Uani 1 1 d . . . . .
 H34 H 0.158721 0.664589 0.545319 0.070 Uiso 1 1 calc R . . . .
 C35 C 0.2500(5) 0.6587(5) 0.6318(3) 0.0526(16) Uani 1 1 d . . . . .
 H35 H 0.210163 0.611038 0.650021 0.063 Uiso 1 1 calc R . . . .
 C36 C 0.3351(7) 0.6954(6) 0.6678(4) 0.073(2) Uani 1 1 d . . . . .
 H36 H 0.355466 0.672700 0.711311 0.088 Uiso 1 1 calc R . . . .
 C37 C 0.3919(6) 0.7626(5) 0.6445(7) 0.109(4) Uani 1 1 d . . . . .
 H37 H 0.449500 0.789425 0.672172 0.131 Uiso 1 1 calc R . . . .
 C38 C 0.3683(7) 0.7933(5) 0.5811(7) 0.108(4) Uani 1 1 d . . . . .
 H38 H 0.410856 0.839602 0.563387 0.129 Uiso 1 1 calc R . . . .
 C39 C 0.2795(8) 0.7550(6) 0.5426(3) 0.077(3) Uani 1 1 d . . . . .
 H39 H 0.260696 0.774781 0.498078 0.092 Uiso 1 1 calc R . . . .
 B1 B 0.3215(4) 0.4031(4) 0.1756(2) 0.0239(11) Uani 1 1 d . . . . .
 H1 H 0.374176 0.411017 0.140918 0.029 Uiso 1 1 calc R . . . .

loop_
  _atom_site_aniso_label
  _atom_site_aniso_U_11
  _atom_site_aniso_U_22
  _atom_site_aniso_U_33
  _atom_site_aniso_U_23
  _atom_site_aniso_U_13
  _atom_site_aniso_U_12
 Cl1 0.0355(7) 0.0296(6) 0.0272(6) 0.0002(5) 0.0035(5) 0.0077(5)
 Cl2 0.0356(7) 0.0358(7) 0.0361(7) -0.0135(5) 0.0002(5) -0.0021(6)
 N1 0.0244(19) 0.021(2) 0.0159(17) 0.0003(14) 0.0070(15) 0.0008(15)
 N2 0.027(2) 0.025(2) 0.0194(18) -0.0006(15) 0.0131(15) 0.0000(16)
 C1 0.036(3) 0.046(3) 0.032(3) -0.002(2) -0.003(2) 0.002(2)
 C2 0.025(2) 0.036(3) 0.021(2) -0.003(2) 0.0014(19) -0.008(2)
 C3 0.026(2) 0.026(2) 0.016(2) -0.0052(18) 0.0079(18) -0.0005(19)
 C4 0.029(2) 0.026(2) 0.015(2) -0.0011(18) 0.0092(18) -0.0001(19)
 C5 0.019(2) 0.028(2) 0.016(2) -0.0010(18) 0.0020(17) -0.0029(19)
 C6 0.032(3) 0.021(2) 0.024(2) 0.0016(19) 0.0132(19) 0.0010(19)
 C7 0.031(3) 0.030(3) 0.023(2) 0.000(2) 0.0092(19) 0.003(2)
 C8 0.038(3) 0.044(3) 0.024(2) 0.002(2) 0.008(2) 0.001(2)
 C9 0.038(3) 0.040(3) 0.040(3) -0.005(2) 0.001(2) 0.005(2)
 C10 0.044(3) 0.045(3) 0.039(3) 0.013(3) 0.026(3) 0.003(3)
 C11 0.051(3) 0.038(3) 0.024(2) 0.004(2) 0.016(2) 0.003(3)
 C12 0.031(3) 0.026(3) 0.030(3) 0.004(2) 0.006(2) 0.000(2)
 C13 0.029(3) 0.040(3) 0.050(3) 0.013(3) 0.020(2) 0.002(2)
 C14 0.033(3) 0.026(3) 0.044(3) 0.008(2) -0.001(2) -0.003(2)
 C15 0.220(13) 0.045(5) 0.098(7) 0.016(4) -0.099(8) -0.033(6)
 C16 0.037(3) 0.099(6) 0.068(4) 0.034(4) 0.012(3) 0.017(4)
 C17 0.026(2) 0.026(2) 0.020(2) -0.0011(19) 0.0049(18) 0.0017(19)
 C18 0.031(3) 0.043(3) 0.021(2) 0.001(2) -0.004(2) 0.001(2)
 C19 0.044(3) 0.046(3) 0.035(3) -0.010(3) -0.009(2) 0.001(3)
 C20 0.036(3) 0.057(4) 0.041(3) -0.008(3) -0.010(2) 0.008(3)
 C21 0.042(3) 0.033(3) 0.016(2) 0.0011(19) 0.007(2) 0.007(2)
 C22 0.044(3) 0.026(3) 0.024(2) 0.004(2) 0.017(2) 0.001(2)
 C23 0.032(3) 0.025(2) 0.028(2) -0.002(2) 0.015(2) -0.005(2)
 C24 0.038(3) 0.052(3) 0.028(3) -0.007(2) 0.001(2) -0.010(3)
 C25 0.037(3) 0.019(2) 0.027(2) -0.0004(19) 0.014(2) -0.001(2)
 C26 0.057(3) 0.030(3) 0.028(3) -0.001(2) 0.022(2) 0.001(3)
 C27 0.049(4) 0.037(3) 0.056(4) -0.002(3) -0.002(3) 0.000(3)
 C28 0.045(3) 0.055(4) 0.032(3) 0.012(3) 0.014(2) 0.006(3)
 C29 0.064(4) 0.042(3) 0.030(3) 0.006(2) 0.015(3) -0.002(3)
 C30 0.050(4) 0.063(4) 0.035(3) 0.014(3) 0.003(3) -0.016(3)
 C31 0.042(3) 0.078(5) 0.040(3) 0.023(3) 0.018(3) 0.015(3)
 C32 0.073(4) 0.049(4) 0.026(3) 0.000(3) 0.014(3) 0.007(3)
 C33 0.051(4) 0.055(4) 0.026(3) 0.006(3) 0.002(2) -0.006(3)
 C34 0.071(5) 0.046(4) 0.055(4) -0.016(3) -0.014(3) -0.002(3)
 C35 0.045(3) 0.056(4) 0.060(4) 0.010(3) 0.024(3) 0.005(3)
 C36 0.093(6) 0.064(5) 0.058(4) -0.015(4) -0.013(4) 0.021(5)
 C37 0.050(5) 0.020(4) 0.244(13) -0.021(6) -0.058(6) 0.008(3)
 C38 0.053(5) 0.034(4) 0.250(13) 0.052(6) 0.089(7) 0.018(4)
 C39 0.123(7) 0.074(5) 0.039(4) 0.017(4) 0.046(4) 0.047(5)
 B1 0.027(3) 0.027(3) 0.018(2) 0.000(2) 0.007(2) -0.002(2)

_geom_special_details
;
 All esds (except the esd in the dihedral angle between two l.s. planes)
 are estimated using the full covariance matrix.  The cell esds are taken
 into account individually in the estimation of esds in distances, angles
 and torsion angles; correlations between esds in cell parameters are only
 used when they are defined by crystal symmetry.  An approximate (isotropic)
 treatment of cell esds is used for estimating esds involving l.s. planes.
;
loop_
  _geom_bond_atom_site_label_1
  _geom_bond_atom_site_label_2
  _geom_bond_distance
  _geom_bond_site_symmetry_2
  _geom_bond_publ_flag
 Cl1 B1 1.865(5) . ?
 Cl2 B1 1.869(5) . ?
 N1 C4 1.451(5) . ?
 N1 C5 1.337(5) . ?
 N1 C25 1.491(6) . ?
 N2 C5 1.329(6) . ?
 N2 C6 1.447(5) . ?
 N2 C26 1.477(6) . ?
 C1 H1A 0.9800 . ?
 C1 H1B 0.9800 . ?
 C1 H1C 0.9800 . ?
 C1 C2 1.538(7) . ?
 C2 H2 1.0000 . ?
 C2 C3 1.522(6) . ?
 C2 C24 1.533(7) . ?
 C3 C4 1.392(6) . ?
 C3 C23 1.401(6) . ?
 C4 C17 1.402(6) . ?
 C5 B1 1.628(7) . ?
 C6 C7 1.391(7) . ?
 C6 C12 1.400(7) . ?
 C7 C8 1.523(7) . ?
 C7 C11 1.400(6) . ?
 C8 H8 1.0000 . ?
 C8 C9 1.525(7) . ?
 C8 C27 1.523(8) . ?
 C9 H9A 0.9800 . ?
 C9 H9B 0.9800 . ?
 C9 H9C 0.9800 . ?
 C10 H10 0.9500 . ?
 C10 C11 1.372(8) . ?
 C10 C13 1.373(8) . ?
 C11 H11 0.9500 . ?
 C12 C13 1.392(7) . ?
 C12 C14 1.513(7) . ?
 C13 H13 0.9500 . ?
 C14 H14 1.0000 . ?
 C14 C15 1.524(9) . ?
 C14 C16 1.530(8) . ?
 C15 H15A 0.9800 . ?
 C15 H15B 0.9800 . ?
 C15 H15C 0.9800 . ?
 C16 H16A 0.9800 . ?
 C16 H16B 0.9800 . ?
 C16 H16C 0.9800 . ?
 C17 C18 1.532(7) . ?
 C17 C21 1.396(6) . ?
 C18 H18 1.0000 . ?
 C18 C19 1.539(7) . ?
 C18 C20 1.543(7) . ?
 C19 H19A 0.9800 . ?
 C19 H19B 0.9800 . ?
 C19 H19C 0.9800 . ?
 C20 H20A 0.9800 . ?
 C20 H20B 0.9800 . ?
 C20 H20C 0.9800 . ?
 C21 H21 0.9500 . ?
 C21 C22 1.383(7) . ?
 C22 H22 0.9500 . ?
 C22 C23 1.371(7) . ?
 C23 H23 0.9500 . ?
 C24 H24A 0.9800 . ?
 C24 H24B 0.9800 . ?
 C24 H24C 0.9800 . ?
 C25 H25A 0.9900 . ?
 C25 H25B 0.9900 . ?
 C25 C26 1.506(6) . ?
 C26 H26A 0.9900 . ?
 C26 H26B 0.9900 . ?
 C27 H27A 0.9800 . ?
 C27 H27B 0.9800 . ?
 C27 H27C 0.9800 . ?
 C28 H28 0.9500 . ?
 C28 C29 1.348(8) . ?
 C28 C33 1.361(8) . ?
 C29 H29 0.9500 . ?
 C29 C30 1.351(9) . ?
 C30 H30 0.9500 . ?
 C30 C31 1.417(10) . ?
 C31 H31 0.9500 . ?
 C31 C32 1.391(9) . ?
 C32 H32 0.9500 . ?
 C32 C33 1.356(8) . ?
 C33 H33 0.9500 . ?
 C34 H34 0.9500 . ?
 C34 C35 1.339(9) . ?
 C34 C39 1.358(11) . ?
 C35 H35 0.9500 . ?
 C35 C36 1.336(10) . ?
 C36 H36 0.9500 . ?
 C36 C37 1.325(13) . ?
 C37 H37 0.9500 . ?
 C37 C38 1.359(15) . ?
 C38 H38 0.9500 . ?
 C38 C39 1.404(14) . ?
 C39 H39 0.9500 . ?
 B1 H1 1.0000 . ?

loop_
  _geom_angle_atom_site_label_1
  _geom_angle_atom_site_label_2
  _geom_angle_atom_site_label_3
  _geom_angle
  _geom_angle_site_symmetry_1
  _geom_angle_site_symmetry_3
  _geom_angle_publ_flag
 C4 N1 C25 120.2(3) . . ?
 C5 N1 C4 128.0(4) . . ?
 C5 N1 C25 111.9(3) . . ?
 C5 N2 C6 128.1(4) . . ?
 C5 N2 C26 113.0(3) . . ?
 C6 N2 C26 118.5(4) . . ?
 H1A C1 H1B 109.5 . . ?
 H1A C1 H1C 109.5 . . ?
 H1B C1 H1C 109.5 . . ?
 C2 C1 H1A 109.5 . . ?
 C2 C1 H1B 109.5 . . ?
 C2 C1 H1C 109.5 . . ?
 C1 C2 H2 108.0 . . ?
 C3 C2 C1 110.0(4) . . ?
 C3 C2 H2 108.0 . . ?
 C3 C2 C24 113.5(4) . . ?
 C24 C2 C1 109.2(4) . . ?
 C24 C2 H2 108.0 . . ?
 C4 C3 C2 122.5(4) . . ?
 C4 C3 C23 117.4(4) . . ?
 C23 C3 C2 119.9(4) . . ?
 C3 C4 N1 119.4(4) . . ?
 C3 C4 C17 122.5(4) . . ?
 C17 C4 N1 117.9(4) . . ?
 N1 C5 B1 128.9(4) . . ?
 N2 C5 N1 109.2(4) . . ?
 N2 C5 B1 121.9(4) . . ?
 C7 C6 N2 117.9(4) . . ?
 C7 C6 C12 122.7(4) . . ?
 C12 C6 N2 119.2(4) . . ?
 C6 C7 C8 123.1(4) . . ?
 C6 C7 C11 117.3(5) . . ?
 C11 C7 C8 119.6(4) . . ?
 C7 C8 H8 107.7 . . ?
 C7 C8 C9 112.3(4) . . ?
 C9 C8 H8 107.7 . . ?
 C27 C8 C7 109.8(4) . . ?
 C27 C8 H8 107.7 . . ?
 C27 C8 C9 111.4(4) . . ?
 C8 C9 H9A 109.5 . . ?
 C8 C9 H9B 109.5 . . ?
 C8 C9 H9C 109.5 . . ?
 H9A C9 H9B 109.5 . . ?
 H9A C9 H9C 109.5 . . ?
 H9B C9 H9C 109.5 . . ?
 C11 C10 H10 119.7 . . ?
 C11 C10 C13 120.6(5) . . ?
 C13 C10 H10 119.7 . . ?
 C7 C11 H11 119.5 . . ?
 C10 C11 C7 120.9(5) . . ?
 C10 C11 H11 119.5 . . ?
 C6 C12 C14 122.4(4) . . ?
 C13 C12 C6 117.3(4) . . ?
 C13 C12 C14 120.3(5) . . ?
 C10 C13 C12 121.1(5) . . ?
 C10 C13 H13 119.5 . . ?
 C12 C13 H13 119.5 . . ?
 C12 C14 H14 108.2 . . ?
 C12 C14 C15 110.7(5) . . ?
 C12 C14 C16 111.5(5) . . ?
 C15 C14 H14 108.2 . . ?
 C15 C14 C16 110.1(6) . . ?
 C16 C14 H14 108.2 . . ?
 C14 C15 H15A 109.5 . . ?
 C14 C15 H15B 109.5 . . ?
 C14 C15 H15C 109.5 . . ?
 H15A C15 H15B 109.5 . . ?
 H15A C15 H15C 109.5 . . ?
 H15B C15 H15C 109.5 . . ?
 C14 C16 H16A 109.5 . . ?
 C14 C16 H16B 109.5 . . ?
 C14 C16 H16C 109.5 . . ?
 H16A C16 H16B 109.5 . . ?
 H16A C16 H16C 109.5 . . ?
 H16B C16 H16C 109.5 . . ?
 C4 C17 C18 123.0(4) . . ?
 C21 C17 C4 117.2(4) . . ?
 C21 C17 C18 119.7(4) . . ?
 C17 C18 H18 108.3 . . ?
 C17 C18 C19 110.0(4) . . ?
 C17 C18 C20 113.0(4) . . ?
 C19 C18 H18 108.3 . . ?
 C19 C18 C20 108.8(4) . . ?
 C20 C18 H18 108.3 . . ?
 C18 C19 H19A 109.5 . . ?
 C18 C19 H19B 109.5 . . ?
 C18 C19 H19C 109.5 . . ?
 H19A C19 H19B 109.5 . . ?
 H19A C19 H19C 109.5 . . ?
 H19B C19 H19C 109.5 . . ?
 C18 C20 H20A 109.5 . . ?
 C18 C20 H20B 109.5 . . ?
 C18 C20 H20C 109.5 . . ?
 H20A C20 H20B 109.5 . . ?
 H20A C20 H20C 109.5 . . ?
 H20B C20 H20C 109.5 . . ?
 C17 C21 H21 119.3 . . ?
 C22 C21 C17 121.5(4) . . ?
 C22 C21 H21 119.3 . . ?
 C21 C22 H22 120.1 . . ?
 C23 C22 C21 119.8(4) . . ?
 C23 C22 H22 120.1 . . ?
 C3 C23 H23 119.3 . . ?
 C22 C23 C3 121.5(4) . . ?
 C22 C23 H23 119.3 . . ?
 C2 C24 H24A 109.5 . . ?
 C2 C24 H24B 109.5 . . ?
 C2 C24 H24C 109.5 . . ?
 H24A C24 H24B 109.5 . . ?
 H24A C24 H24C 109.5 . . ?
 H24B C24 H24C 109.5 . . ?
 N1 C25 H25A 111.1 . . ?
 N1 C25 H25B 111.1 . . ?
 N1 C25 C26 103.1(4) . . ?
 H25A C25 H25B 109.1 . . ?
 C26 C25 H25A 111.1 . . ?
 C26 C25 H25B 111.1 . . ?
 N2 C26 C25 102.8(4) . . ?
 N2 C26 H26A 111.2 . . ?
 N2 C26 H26B 111.2 . . ?
 C25 C26 H26A 111.2 . . ?
 C25 C26 H26B 111.2 . . ?
 H26A C26 H26B 109.1 . . ?
 C8 C27 H27A 109.5 . . ?
 C8 C27 H27B 109.5 . . ?
 C8 C27 H27C 109.5 . . ?
 H27A C27 H27B 109.5 . . ?
 H27A C27 H27C 109.5 . . ?
 H27B C27 H27C 109.5 . . ?
 C29 C28 H28 120.2 . . ?
 C29 C28 C33 119.6(6) . . ?
 C33 C28 H28 120.2 . . ?
 C28 C29 H29 118.9 . . ?
 C28 C29 C30 122.2(6) . . ?
 C30 C29 H29 118.9 . . ?
 C29 C30 H30 120.5 . . ?
 C29 C30 C31 119.0(6) . . ?
 C31 C30 H30 120.5 . . ?
 C30 C31 H31 121.1 . . ?
 C32 C31 C30 117.9(6) . . ?
 C32 C31 H31 121.1 . . ?
 C31 C32 H32 119.8 . . ?
 C33 C32 C31 120.3(6) . . ?
 C33 C32 H32 119.8 . . ?
 C28 C33 H33 119.5 . . ?
 C32 C33 C28 120.9(6) . . ?
 C32 C33 H33 119.5 . . ?
 C35 C34 H34 119.6 . . ?
 C35 C34 C39 120.7(7) . . ?
 C39 C34 H34 119.6 . . ?
 C34 C35 H35 120.1 . . ?
 C36 C35 C34 119.8(7) . . ?
 C36 C35 H35 120.1 . . ?
 C35 C36 H36 119.1 . . ?
 C37 C36 C35 121.9(8) . . ?
 C37 C36 H36 119.1 . . ?
 C36 C37 H37 119.8 . . ?
 C36 C37 C38 120.4(8) . . ?
 C38 C37 H37 119.8 . . ?
 C37 C38 H38 120.8 . . ?
 C37 C38 C39 118.3(6) . . ?
 C39 C38 H38 120.8 . . ?
 C34 C39 C38 118.7(7) . . ?
 C34 C39 H39 120.6 . . ?
 C38 C39 H39 120.6 . . ?
 Cl1 B1 Cl2 110.1(3) . . ?
 Cl1 B1 H1 109.0 . . ?
 Cl2 B1 H1 109.0 . . ?
 C5 B1 Cl1 109.6(3) . . ?
 C5 B1 Cl2 110.1(3) . . ?
 C5 B1 H1 109.0 . . ?

loop_
  _geom_torsion_atom_site_label_1
  _geom_torsion_atom_site_label_2
  _geom_torsion_atom_site_label_3
  _geom_torsion_atom_site_label_4
  _geom_torsion
  _geom_torsion_site_symmetry_1
  _geom_torsion_site_symmetry_2
  _geom_torsion_site_symmetry_3
  _geom_torsion_site_symmetry_4
  _geom_torsion_publ_flag
 N1 C4 C17 C18 0.3(6) . . . . ?
 N1 C4 C17 C21 177.3(4) . . . . ?
 N1 C5 B1 Cl1 -49.9(6) . . . . ?
 N1 C5 B1 Cl2 71.3(5) . . . . ?
 N1 C25 C26 N2 2.7(5) . . . . ?
 N2 C5 B1 Cl1 130.5(4) . . . . ?
 N2 C5 B1 Cl2 -108.3(4) . . . . ?
 N2 C6 C7 C8 -10.0(7) . . . . ?
 N2 C6 C7 C11 172.7(4) . . . . ?
 N2 C6 C12 C13 -172.8(4) . . . . ?
 N2 C6 C12 C14 7.7(7) . . . . ?
 C1 C2 C3 C4 -95.6(5) . . . . ?
 C1 C2 C3 C23 80.1(5) . . . . ?
 C2 C3 C4 N1 -3.4(6) . . . . ?
 C2 C3 C4 C17 171.6(4) . . . . ?
 C2 C3 C23 C22 -172.8(4) . . . . ?
 C3 C4 C17 C18 -174.8(4) . . . . ?
 C3 C4 C17 C21 2.2(7) . . . . ?
 C4 N1 C5 N2 179.4(4) . . . . ?
 C4 N1 C5 B1 -0.3(7) . . . . ?
 C4 N1 C25 C26 178.9(4) . . . . ?
 C4 C3 C23 C22 3.2(7) . . . . ?
 C4 C17 C18 C19 102.3(5) . . . . ?
 C4 C17 C18 C20 -136.0(5) . . . . ?
 C4 C17 C21 C22 1.0(7) . . . . ?
 C5 N1 C4 C3 -88.1(6) . . . . ?
 C5 N1 C4 C17 96.6(5) . . . . ?
 C5 N1 C25 C26 -2.0(5) . . . . ?
 C5 N2 C6 C7 108.2(5) . . . . ?
 C5 N2 C6 C12 -76.3(6) . . . . ?
 C5 N2 C26 C25 -2.8(6) . . . . ?
 C6 N2 C5 N1 173.9(4) . . . . ?
 C6 N2 C5 B1 -6.3(7) . . . . ?
 C6 N2 C26 C25 -175.9(4) . . . . ?
 C6 C7 C8 C9 124.5(5) . . . . ?
 C6 C7 C8 C27 -111.0(5) . . . . ?
 C6 C7 C11 C10 1.5(8) . . . . ?
 C6 C12 C13 C10 -1.2(8) . . . . ?
 C6 C12 C14 C15 -107.1(8) . . . . ?
 C6 C12 C14 C16 130.0(5) . . . . ?
 C7 C6 C12 C13 2.6(7) . . . . ?
 C7 C6 C12 C14 -176.9(5) . . . . ?
 C8 C7 C11 C10 -175.9(5) . . . . ?
 C11 C7 C8 C9 -58.2(6) . . . . ?
 C11 C7 C8 C27 66.3(6) . . . . ?
 C11 C10 C13 C12 0.0(9) . . . . ?
 C12 C6 C7 C8 174.6(5) . . . . ?
 C12 C6 C7 C11 -2.7(7) . . . . ?
 C13 C10 C11 C7 -0.2(9) . . . . ?
 C13 C12 C14 C15 73.5(8) . . . . ?
 C13 C12 C14 C16 -49.4(7) . . . . ?
 C14 C12 C13 C10 178.3(5) . . . . ?
 C17 C21 C22 C23 -1.9(7) . . . . ?
 C18 C17 C21 C22 178.0(4) . . . . ?
 C21 C17 C18 C19 -74.6(6) . . . . ?
 C21 C17 C18 C20 47.1(6) . . . . ?
 C21 C22 C23 C3 -0.2(7) . . . . ?
 C23 C3 C4 N1 -179.2(4) . . . . ?
 C23 C3 C4 C17 -4.2(7) . . . . ?
 C24 C2 C3 C4 141.8(4) . . . . ?
 C24 C2 C3 C23 -42.5(6) . . . . ?
 C25 N1 C4 C3 90.9(5) . . . . ?
 C25 N1 C4 C17 -84.3(5) . . . . ?
 C25 N1 C5 N2 0.3(5) . . . . ?
 C25 N1 C5 B1 -179.4(4) . . . . ?
 C26 N2 C5 N1 1.7(5) . . . . ?
 C26 N2 C5 B1 -178.6(4) . . . . ?
 C26 N2 C6 C7 -80.0(6) . . . . ?
 C26 N2 C6 C12 95.6(5) . . . . ?
 C28 C29 C30 C31 -0.2(8) . . . . ?
 C29 C28 C33 C32 -0.9(8) . . . . ?
 C29 C30 C31 C32 0.3(8) . . . . ?
 C30 C31 C32 C33 -0.7(8) . . . . ?
 C31 C32 C33 C28 1.1(8) . . . . ?
 C33 C28 C29 C30 0.5(8) . . . . ?
 C34 C35 C36 C37 0.7(11) . . . . ?
 C35 C34 C39 C38 -2.8(10) . . . . ?
 C35 C36 C37 C38 -3.4(13) . . . . ?
 C36 C37 C38 C39 2.9(12) . . . . ?
 C37 C38 C39 C34 0.1(11) . . . . ?
 C39 C34 C35 C36 2.4(10) . . . . ?

_shelx_res_file
;
TITL mo_GK_12112021_0m_a.res in P2(1)/n
    mo_gk_12112021_0m_a.res
    created by SHELXL-2018/3 at 16:09:48 on 02-Jun-2022
CELL 0.71073 12.3193 14.7968 20.0939 90 94.984 90
ZERR 4 0.0019 0.0025 0.0032 0 0.005 0
LATT 1
SYMM 0.5-X,0.5+Y,0.5-Z
SFAC C H B Cl N
UNIT 156 204 4 8 8

L.S. 40
PLAN  -5 0 0
SIZE 0.06 0.13 0.14
TEMP -173.15
HTAB
BOND $H
CONF
fmap 2
acta
OMIT -3 50
REM <olex2.extras>
REM <HklSrc "%.\\mo_GK_12112021_0m_c.hkl">
REM </olex2.extras>

WGHT    0.089400   11.812800
FVAR       0.41306
CL1   4    0.390293    0.341248    0.248384    11.00000    0.03550    0.02958 =
         0.02719    0.00018    0.00346    0.00767
CL2   4    0.201276    0.337372    0.139004    11.00000    0.03555    0.03576 =
         0.03605   -0.01350    0.00021   -0.00208
N1    5    0.226452    0.523619    0.251345    11.00000    0.02439    0.02139 =
         0.01590    0.00028    0.00695    0.00083
N2    5    0.305135    0.577336    0.167124    11.00000    0.02697    0.02500 =
         0.01936   -0.00059    0.01311    0.00004
C1    1   -0.072774    0.523381    0.239857    11.00000    0.03557    0.04641 =
         0.03186   -0.00201   -0.00261    0.00206
AFIX 137
H1A   2   -0.121872    0.500531    0.271829    11.00000   -1.50000
H1B   2   -0.115460    0.541887    0.198684    11.00000   -1.50000
H1C   2   -0.032206    0.575425    0.259220    11.00000   -1.50000
AFIX   0
C2    1    0.007588    0.448535    0.223913    11.00000    0.02525    0.03592 =
         0.02074   -0.00328    0.00144   -0.00775
AFIX  13
H2    2    0.054290    0.472347    0.189582    11.00000   -1.20000
AFIX   0
C3    1    0.081397    0.425119    0.286239    11.00000    0.02626    0.02608 =
         0.01591   -0.00522    0.00785   -0.00052
C4    1    0.184353    0.463063    0.299749    11.00000    0.02889    0.02579 =
         0.01473   -0.00111    0.00916   -0.00012
C5    1    0.282809    0.502274    0.199636    11.00000    0.01947    0.02807 =
         0.01555   -0.00103    0.00202   -0.00288
C6    1    0.372440    0.587246    0.112031    11.00000    0.03171    0.02114 =
         0.02405    0.00161    0.01321    0.00098
C7    1    0.320838    0.604814    0.049020    11.00000    0.03108    0.03012 =
         0.02334   -0.00020    0.00918    0.00302
C8    1    0.197812    0.599268    0.033397    11.00000    0.03777    0.04360 =
         0.02412    0.00168    0.00751    0.00090
AFIX  13
H8    2    0.164649    0.588221    0.076355    11.00000   -1.20000
AFIX   0
C9    1    0.149981    0.686903    0.003621    11.00000    0.03811    0.04031 =
         0.03986   -0.00500    0.00081    0.00458
AFIX 137
H9A   2    0.161771    0.735721    0.036413    11.00000   -1.50000
H9B   2    0.071648    0.679132   -0.008095    11.00000   -1.50000
H9C   2    0.185785    0.702177   -0.036590    11.00000   -1.50000
AFIX   0
C10   1    0.498557    0.624648    0.009398    11.00000    0.04362    0.04538 =
         0.03931    0.01322    0.02616    0.00296
AFIX  43
H10   2    0.542191    0.638134   -0.026045    11.00000   -1.20000
AFIX   0
C11   1    0.387150    0.624727   -0.002214    11.00000    0.05119    0.03774 =
         0.02350    0.00403    0.01580    0.00298
AFIX  43
H11   2    0.354556    0.638484   -0.045619    11.00000   -1.20000
AFIX   0
C12   1    0.485996    0.585183    0.124727    11.00000    0.03086    0.02616 =
         0.03023    0.00390    0.00608    0.00008
C13   1    0.547607    0.605264    0.071760    11.00000    0.02905    0.03990 =
         0.05012    0.01296    0.01979    0.00250
AFIX  43
H13   2    0.624859    0.605567    0.078865    11.00000   -1.20000
AFIX   0
C14   1    0.541657    0.561484    0.192575    11.00000    0.03305    0.02650 =
         0.04357    0.00802   -0.00054   -0.00332
AFIX  13
H14   2    0.485428    0.536839    0.220691    11.00000   -1.20000
AFIX   0
C15   1    0.591455    0.645351    0.227029    11.00000    0.22031    0.04494 =
         0.09772    0.01624   -0.09854   -0.03257
AFIX 137
H15A  2    0.632613    0.679132    0.195637    11.00000   -1.50000
H15B  2    0.640463    0.627191    0.265748    11.00000   -1.50000
H15C  2    0.533315    0.683670    0.241861    11.00000   -1.50000
AFIX   0
C16   1    0.629183    0.489148    0.187229    11.00000    0.03715    0.09867 =
         0.06841    0.03410    0.01162    0.01713
AFIX 137
H16A  2    0.596172    0.435173    0.165663    11.00000   -1.50000
H16B  2    0.661482    0.473489    0.232036    11.00000   -1.50000
H16C  2    0.685968    0.512440    0.160563    11.00000   -1.50000
AFIX   0
C17   1    0.246563    0.450606    0.360876    11.00000    0.02564    0.02592 =
         0.01972   -0.00114    0.00491    0.00175
C18   1    0.355697    0.498236    0.378554    11.00000    0.03112    0.04252 =
         0.02122    0.00066   -0.00446    0.00103
AFIX  13
H18   2    0.382210    0.522647    0.336477    11.00000   -1.20000
AFIX   0
C19   1    0.340016    0.577958    0.426000    11.00000    0.04398    0.04605 =
         0.03452   -0.00953   -0.00898    0.00051
AFIX 137
H19A  2    0.283916    0.618686    0.405544    11.00000   -1.50000
H19B  2    0.408854    0.610934    0.434276    11.00000   -1.50000
H19C  2    0.317296    0.555007    0.468383    11.00000   -1.50000
AFIX   0
C20   1    0.443897    0.434637    0.411604    11.00000    0.03640    0.05688 =
         0.04111   -0.00759   -0.00954    0.00766
AFIX 137
H20A  2    0.423250    0.415736    0.455514    11.00000   -1.50000
H20B  2    0.513854    0.466496    0.416940    11.00000   -1.50000
H20C  2    0.450593    0.381294    0.383344    11.00000   -1.50000
AFIX   0
C21   1    0.202759    0.395219    0.407998    11.00000    0.04156    0.03253 =
         0.01572    0.00107    0.00750    0.00734
AFIX  43
H21   2    0.242387    0.386161    0.450169    11.00000   -1.20000
AFIX   0
C22   1    0.102959    0.353243    0.394656    11.00000    0.04424    0.02592 =
         0.02362    0.00396    0.01694    0.00061
AFIX  43
H22   2    0.075656    0.314342    0.426914    11.00000   -1.20000
AFIX   0
C23   1    0.043530    0.367922    0.334751    11.00000    0.03244    0.02537 =
         0.02814   -0.00195    0.01496   -0.00550
AFIX  43
H23   2   -0.024850    0.338665    0.325930    11.00000   -1.20000
AFIX   0
C24   1   -0.056457    0.367422    0.193651    11.00000    0.03813    0.05155 =
         0.02754   -0.00700    0.00056   -0.00995
AFIX 137
H24A  2   -0.006406    0.317018    0.188164    11.00000   -1.50000
H24B  2   -0.092483    0.384265    0.150011    11.00000   -1.50000
H24C  2   -0.111430    0.349122    0.223429    11.00000   -1.50000
AFIX   0
C25   1    0.206922    0.622799    0.255423    11.00000    0.03704    0.01947 =
         0.02676   -0.00037    0.01382   -0.00051
AFIX  23
H25A  2    0.238150    0.647581    0.298687    11.00000   -1.20000
H25B  2    0.128074    0.636773    0.249707    11.00000   -1.20000
AFIX   0
C26   1    0.264854    0.659824    0.198303    11.00000    0.05726    0.03023 =
         0.02792   -0.00116    0.02221    0.00062
AFIX  23
H26A  2    0.214172    0.693750    0.166533    11.00000   -1.20000
H26B  2    0.325832    0.699877    0.214605    11.00000   -1.20000
AFIX   0
C27   1    0.169504    0.519092   -0.012382    11.00000    0.04878    0.03685 =
         0.05608   -0.00237   -0.00191   -0.00027
AFIX 137
H27A  2    0.203817    0.526878   -0.054218    11.00000   -1.50000
H27B  2    0.090263    0.515513   -0.022020    11.00000   -1.50000
H27C  2    0.196216    0.463293    0.009634    11.00000   -1.50000
AFIX   0

C28   1    0.517552    0.820016   -0.113941    11.00000    0.04475    0.05515 =
         0.03168    0.01240    0.01422    0.00604
AFIX  43
H28   2    0.587571    0.795226   -0.118761    11.00000   -1.20000
AFIX   0
C29   1    0.427284    0.776614   -0.139688    11.00000    0.06447    0.04190 =
         0.02967    0.00571    0.01525   -0.00225
AFIX  43
H29   2    0.435015    0.720898   -0.162288    11.00000   -1.20000
AFIX   0
C30   1    0.326192    0.809701   -0.134427    11.00000    0.05003    0.06342 =
         0.03480    0.01430    0.00263   -0.01575
AFIX  43
H30   2    0.263918    0.777800   -0.153130    11.00000   -1.20000
AFIX   0
C31   1    0.314381    0.892696   -0.100599    11.00000    0.04218    0.07824 =
         0.04013    0.02251    0.01769    0.01515
AFIX  43
H31   2    0.244386    0.917609   -0.095901    11.00000   -1.20000
AFIX   0
C32   1    0.408486    0.936508   -0.074504    11.00000    0.07293    0.04895 =
         0.02639   -0.00025    0.01381    0.00739
AFIX  43
H32   2    0.403209    0.992602   -0.052012    11.00000   -1.20000
AFIX   0
C33   1    0.507775    0.899563   -0.081000    11.00000    0.05146    0.05536 =
         0.02561    0.00584    0.00231   -0.00636
AFIX  43
H33   2    0.571393    0.929645   -0.062289    11.00000   -1.20000
AFIX   0

C34   1    0.220951    0.689234    0.570110    11.00000    0.07067    0.04644 =
         0.05544   -0.01642   -0.01422   -0.00174
AFIX  43
H34   2    0.158721    0.664589    0.545319    11.00000   -1.20000
AFIX   0
C35   1    0.249990    0.658691    0.631842    11.00000    0.04536    0.05552 =
         0.06043    0.00956    0.02395    0.00455
AFIX  43
H35   2    0.210163    0.611038    0.650021    11.00000   -1.20000
AFIX   0
C36   1    0.335107    0.695410    0.667789    11.00000    0.09331    0.06372 =
         0.05843   -0.01545   -0.01256    0.02067
AFIX  43
H36   2    0.355466    0.672700    0.711311    11.00000   -1.20000
AFIX   0
C37   1    0.391911    0.762584    0.644460    11.00000    0.05023    0.02047 =
         0.24405   -0.02120   -0.05832    0.00801
AFIX  43
H37   2    0.449500    0.789425    0.672172    11.00000   -1.20000
AFIX   0
C38   1    0.368323    0.793349    0.581129    11.00000    0.05263    0.03368 =
         0.25014    0.05176    0.08896    0.01811
AFIX  43
H38   2    0.410856    0.839602    0.563387    11.00000   -1.20000
AFIX   0
C39   1    0.279483    0.755035    0.542577    11.00000    0.12322    0.07425 =
         0.03922    0.01740    0.04557    0.04667
AFIX  43
H39   2    0.260696    0.774781    0.498078    11.00000   -1.20000
AFIX   0

B1    3    0.321509    0.403136    0.175640    11.00000    0.02733    0.02737 =
         0.01800    0.00021    0.00738   -0.00187
AFIX  13
H1    2    0.374176    0.411017    0.140918    11.00000   -1.20000
AFIX   0
HKLF 4


REM  mo_GK_12112021_0m_a.res in P2(1)/n
REM wR2 = 0.2441, GooF = S = 1.151, Restrained GooF = 1.151 for all data
REM R1 = 0.0933 for 5083 Fo > 4sig(Fo) and 0.1166 for all 6392 data
REM 405 parameters refined using 0 restraints

END

WGHT      0.0894     11.8128

REM No hydrogen bonds found for HTAB generation

REM Highest difference peak  0.419,  deepest hole -0.517,  1-sigma level  0.099
Q1    1   0.5352  0.8764  0.0185  11.00000  0.05    0.42
Q2    1   0.3952  0.7947  0.6013  11.00000  0.05    0.35
Q3    1   0.4802  0.8855  0.0535  11.00000  0.05    0.35
Q4    1   0.5181  0.6209 -0.0527  11.00000  0.05    0.34
Q5    1   0.3598  0.7762  0.5393  11.00000  0.05    0.34
;
_shelx_res_checksum                31938
_shelx_hkl_file
;
   2   0   0 1999.90  145.69
   2   0   0 1945.71  145.29
   2   0   0 1819.72  145.69
   2   0   0 1875.41  145.39
   2   0   0 1934.01  145.69
   2   0   0 1674.33  143.59
   2   0   0 1766.92  144.99
  -2   0   0 1621.54  144.29
  -2   0   0 1693.43  144.29
  -2   0   0 2014.00  145.39
  -2   0   0 1657.63  143.99
  -2   0   0 1869.51  145.09
  -2   0   0 1765.82  145.29
  -2   0   0 1979.50  145.19
  -2   0   0 1553.94  144.99
  -2   0   0 1751.82  145.59
  -2   0   0 1935.51  145.29
  -2   0   0 1704.23  145.39
  -2   0   0 1564.84  143.49
   2   0   0 1900.81  145.29
   2   0   0 1852.81  143.79
  -3   0   0    2.80    8.40
  -3   0   0   -2.90    9.00
  -3   0   0   21.10    8.50
  -3   0   0   77.99   12.80
  -3   0   0   36.90   12.30
  -3   0   0   55.39   14.80
  -3   0   0   14.10   11.70
  -3   0   0   33.70   10.10
  -3   0   0   23.60   31.20
   3   0   0   46.10    7.90
   3   0   0   31.00   13.40
   3   0   0   42.80    8.20
  -3   0   0   61.09   11.30
  -4   0   0  -51.29   49.00
  -4   0   0   45.90   11.10
  -4   0   0   44.90   11.80
  -4   0   0   38.40   11.00
  -4   0   0   29.60   11.30
  -4   0   0   21.80   11.90
  -4   0   0   29.20    9.90
  -4   0   0   24.70   12.60
  -4   0   0   44.20   14.40
  -4   0   0   24.90   10.10
  -4   0   0    6.20   13.00
  -4   0   0   22.20    8.50
   4   0   0   35.40    5.90
   4   0   0   40.50   13.60
   4   0   0   13.20   13.40
   4   0   0   47.50   11.40
  -4   0   0    4.10    9.70
  -4   0   0   13.50    8.90
   4   0   0   18.20    8.80
   4   0   0   46.20   11.90
   4   0   0   47.30   13.50
  -5   0   0    9.60   11.80
   5   0   0   -1.30   11.20
  -5   0   0    6.90   11.70
   5   0   0    8.90   13.80
   5   0   0    9.00   11.10
  -5   0   0   -0.30   10.40
  -5   0   0  -22.00   22.80
  -5   0   0   13.70    9.90
  -5   0   0   12.10   10.10
  -5   0   0    0.00    9.30
   5   0   0    0.80    4.00
   5   0   0   16.70   14.50
   5   0   0   -0.50   11.20
   5   0   0    4.10   10.30
  -5   0   0   -3.30    8.00
  -5   0   0   14.10   10.70
  -5   0   0    8.60   13.80
  -5   0   0   10.30   14.70
  -5   0   0   16.40   12.20
  -5   0   0    8.50   11.50
  -5   0   0    3.30    8.00
  -6   0   0   81.39   16.50
  -6   0   0   43.10   35.00
  -6   0   0   65.59   16.10
  -6   0   0   66.29   15.10
  -6   0   0   39.40   11.50
  -6   0   0   51.99   15.10
  -6   0   0   40.50   15.80
  -6   0   0   37.20   18.00
  -6   0   0   22.70   13.20
   6   0   0   40.20   17.00
   6   0   0   55.19   18.30
   6   0   0   74.89   16.10
   6   0   0   56.69   17.20
  -6   0   0   43.50   12.00
  -6   0   0   36.20   15.80
  -6   0   0   47.10   18.50
  -6   0   0   69.99   20.00
   6   0   0   43.80   13.40
  -6   0   0   59.19   16.90
  -6   0   0   36.90   12.70
   6   0   0   37.10   16.80
  -7   0   0   17.50   14.80
  -7   0   0   20.70   12.40
  -7   0   0    1.90   13.50
   7   0   0    2.20   12.80
   7   0   0    6.60   14.60
   7   0   0   24.10   11.90
  -7   0   0   12.90   10.60
  -7   0   0   64.99   40.40
  -7   0   0   -4.30   10.60
  -7   0   0    3.80   12.50
  -7   0   0   -8.60    7.90
  -7   0   0    7.80    7.60
  -7   0   0   -9.50   13.30
  -7   0   0    9.30    9.80
  -7   0   0    3.60    8.00
  -7   0   0   19.40   13.20
  -7   0   0    6.40   13.20
   7   0   0   36.70   16.50
   7   0   0    8.40   11.80
   7   0   0   25.90   13.70
   7   0   0   -2.50   11.60
  -8   0   0   27.40    9.10
   8   0   0   13.80   18.00
  -8   0   0   39.90   17.90
  -8   0   0   50.69   19.00
  -8   0   0   21.80   11.60
  -8   0   0   53.49   19.30
  -8   0   0   38.70   12.60
  -8   0   0   30.40   12.20
  -8   0   0   32.20   12.80
  -8   0   0   22.80   14.90
  -8   0   0   34.90   17.60
   8   0   0   24.40   13.60
   8   0   0   66.89   18.60
  -8   0   0   42.40   17.20
  -8   0   0   54.89   21.50
   8   0   0   42.30   16.20
  -8   0   0   46.70   14.30
  -8   0   0   26.60   15.00
   8   0   0   30.30   14.60
   8   0   0   20.30   15.40
   8   0   0   20.50   17.40
  -9   0   0    6.90   14.00
  -9   0   0   -7.80   15.10
  -9   0   0   -7.50   17.40
   9   0   0    7.60   13.70
   9   0   0    8.30   15.70
  -9   0   0    6.00   14.40
  -9   0   0   -1.20   18.90
  -9   0   0   33.10   16.40
  -9   0   0   15.50    7.40
   9   0   0   10.60   15.30
   9   0   0   30.40   16.00
  -9   0   0   15.60   11.20
   9   0   0   33.20   20.10
  -9   0   0    6.80   15.70
  -9   0   0    8.50   14.30
   9   0   0   15.90   15.70
  -9   0   0   19.10   13.30
   9   0   0   -5.20   12.50
  10   0   0  247.68   43.90
  10   0   0  251.47  116.29
 -10   0   0  316.37   31.40
 -10   0   0  303.27   44.70
 -10   0   0  276.67   35.20
  10   0   0  291.67   41.40
  10   0   0  318.07   49.10
 -10   0   0  295.67   37.60
  10   0   0  332.97   46.80
 -10   0   0  275.97   36.50
 -10   0   0  267.47   43.20
 -10   0   0  326.97   40.90
 -10   0   0  358.76   50.69
 -10   0   0  305.07   47.00
  10   0   0  285.27   43.00
 -10   0   0  324.47   42.30
  11   0   0   -3.70   15.80
 -11   0   0   18.40   23.00
  11   0   0    8.70   22.30
  11   0   0   16.50   19.90
 -11   0   0   -3.20   19.10
 -11   0   0  -13.00   16.10
 -11   0   0   -7.00   16.40
 -11   0   0   34.70   19.40
  11   0   0  184.08   91.89
  11   0   0   25.10   25.30
 -11   0   0   -2.70   19.40
 -11   0   0   15.30   19.20
 -11   0   0   -3.60    9.30
  12   0   0   31.70   22.40
  12   0   0   45.90   20.40
 -12   0   0   44.60   28.30
 -12   0   0   72.49   27.30
 -12   0   0   53.89   22.90
 -12   0   0   50.69   24.60
 -12   0   0   58.59   23.90
  12   0   0   74.09   26.50
 -12   0   0   59.79   19.40
 -12   0   0   33.50   23.90
  12   0   0    7.30   21.20
 -12   0   0   21.80   22.50
  13   0   0   15.40   26.70
  13   0   0    7.60   17.60
 -13   0   0   25.80   24.10
  13   0   0   30.00   24.50
 -13   0   0   14.30   24.80
 -13   0   0   15.80   24.10
 -13   0   0    2.40    9.90
 -13   0   0   15.20   21.80
  14   0   0   28.60   29.60
  14   0   0   -6.60   19.20
  14   0   0   25.80   19.50
 -14   0   0  -30.50   19.00
 -14   0   0   50.59   28.60
 -14   0   0   37.10   23.30
 -14   0   0  -18.40   25.70
 -15   0   0   42.40   25.20
  15   0   0   44.60   33.90
 -15   0   0    0.10   27.30
 -15   0   0   27.50   28.70
 -15   0   0   35.50   25.50
 -15   0   0   34.30   26.10
  15   0   0   -2.00   21.20
 -16   0   0    5.90   23.80
 -16   0   0   10.70   26.90
 -16   0   0   35.80   27.00
  16   0   0   82.09   40.40
  -1  -1   0    1.10    2.00
   1  -1   0    0.30    2.80
   1  -1   0    6.60    5.00
   1  -1   0   12.10    3.50
  -1  -1   0    0.80    3.60
  -1  -1   0    2.10    3.40
   1  -1   0   13.00    5.60
  -1  -1   0   -1.70    3.50
   1  -1   0    4.30    4.40
  -1  -1   0   -1.10    1.70
   1  -1   0    1.30    1.90
   1  -1   0    1.00    2.00
  -1  -1   0   -0.40    3.80
  -1  -1   0    2.10    2.30
  -1  -1   0    1.90    2.70
   1  -1   0    2.10    2.60
   1  -1   0    4.40    2.30
  -1  -1   0   -0.40    1.40
  -1  -1   0   -4.50   11.20
   1  -1   0    2.50    5.50
  -1   1   0   -0.40    1.70
   1   1   0   10.00    5.20
   1   1   0   -1.60    2.40
  -1   1   0    2.40    2.00
   1   1   0    7.10    2.60
  -1   1   0   -1.60    2.00
   1   1   0    9.10    3.40
   1   1   0    3.50    4.00
  -1   1   0   -2.10    2.10
  -1   1   0   -1.00    1.00
  -1   1   0   -0.50    2.50
  -1   1   0   -2.10    2.70
  -1   1   0    0.50    2.20
   1   1   0    2.70    4.00
   1   1   0    4.00    5.90
   1   1   0    5.20    5.00
   1   1   0   -0.20    4.70
  -1   1   0   -0.50    3.30
  -2  -1   0  948.71   85.09
  -2  -1   0 1028.20   85.09
  -2  -1   0 1011.80   83.89
   2  -1   0  960.80   83.39
   2  -1   0 1054.49   84.99
   2  -1   0 1098.79   82.59
  -2  -1   0 1131.59   83.99
   2  -1   0  917.71   83.99
   2  -1   0  965.20   82.49
  -2  -1   0 1042.50   85.39
  -2  -1   0  926.21   81.49
  -2  -1   0 1019.60   83.29
  -2  -1   0 1014.60   85.49
  -2  -1   0 1023.30   84.29
  -2  -1   0 1103.69   83.79
   2  -1   0 1055.89   85.29
   2  -1   0  975.00   84.59
  -2  -1   0  946.71   83.29
   2  -1   0 1078.69   82.29
  -2   1   0  983.60   83.39
   2   1   0 1102.69   85.49
   2   1   0 1153.08   84.29
  -2   1   0  949.90   82.69
  -2   1   0 1171.48   84.19
   2   1   0  983.10   85.29
  -2   1   0  967.30   84.69
  -2   1   0  977.10   82.39
   2   1   0 1147.09   84.39
  -2   1   0  935.81   81.79
   2   1   0  963.20   83.09
   2   1   0 1114.59   84.19
   2   1   0 1048.30   83.39
   2   1   0 1036.60   83.79
  -2   1   0 1116.99   84.09
  -2   1   0  946.81   83.29
  -2   1   0 1002.10   84.89
  -2   1   0 1016.20   84.69
  -2   1   0  925.81   84.09
   2   1   0  971.00   85.09
  -2   1   0 1118.49   83.99
   3  -1   0  -14.20    7.80
  -3  -1   0  -19.20    7.50
   3  -1   0  -10.90    8.30
  -3  -1   0    3.80   21.00
   3  -1   0    4.00    3.80
  -3  -1   0   10.60   10.10
  -3  -1   0   -5.80   12.80
  -3  -1   0    3.00    8.70
  -3  -1   0   -2.60   12.40
  -3  -1   0   -0.20    8.00
   3  -1   0  -12.60    9.30
  -3  -1   0   -3.10    5.10
  -3  -1   0    3.20    9.70
   3  -1   0   -1.50    8.30
  -3  -1   0   -4.60    8.00
  -3  -1   0   -4.10    8.30
   3  -1   0   -2.30    1.10
   3  -1   0    5.50    8.00
   3  -1   0  -15.20    7.80
   3  -1   0    2.90   11.00
  -3  -1   0   -7.90    9.20
  -3   1   0   -7.40    9.60
  -3   1   0   -4.60    8.50
  -3   1   0   -5.60    8.90
  -3   1   0  -11.30    7.30
  -3   1   0    2.20    7.10
  -3   1   0    2.30    4.90
  -3   1   0   -1.20    7.20
   3   1   0   -9.50    7.10
  -3   1   0   -5.30   22.60
   3   1   0   10.10    7.70
  -3   1   0    4.30   11.40
   3   1   0   -5.90    6.30
   3   1   0   -3.10    8.90
   3   1   0   -8.30    9.20
  -3   1   0  -15.10    6.40
   3   1   0   -3.20   12.20
   3   1   0   -6.30    9.00
   3   1   0   -5.00   10.60
  -3   1   0   -3.50    8.80
   3   1   0    8.70   12.00
  -3   1   0   -8.90   11.50
  -3   1   0    0.30    9.40
  -4  -1   0 1063.09   84.79
  -4  -1   0 1004.90   82.69
   4  -1   0  954.20   83.09
  -4  -1   0 1044.80   84.29
   4  -1   0  970.50   84.89
  -4  -1   0  988.50   89.99
  -4  -1   0 1014.60   84.69
  -4  -1   0  940.91   85.59
  -4  -1   0 1000.80   84.79
   4  -1   0 1074.59   84.19
   4  -1   0 1055.19   85.49
  -4  -1   0  971.80   85.19
  -4  -1   0 1066.19   84.99
   4  -1   0 1037.30   86.09
  -4  -1   0  989.70   87.29
  -4  -1   0  993.90   84.29
   4  -1   0 1050.29   86.09
  -4  -1   0 1041.30   87.59
   4  -1   0 1017.00   84.99
   4   1   0 1087.09   84.59
   4   1   0 1015.90   86.69
   4   1   0  877.01   85.89
  -4   1   0 1007.00   84.29
  -4   1   0  974.60   83.09
   4   1   0  955.10   84.89
  -4   1   0 1068.59   84.89
   4   1   0  920.21   86.79
  -4   1   0  936.51   85.69
   4   1   0 1036.50   83.09
  -4   1   0 1043.60   84.29
  -4   1   0 1025.20   84.09
  -4   1   0 1106.89   85.29
  -4   1   0  997.40   85.79
  -4   1   0  884.71   85.69
   4   1   0  857.71   82.19
  -4   1   0  997.60   85.39
   4   1   0  964.80   85.29
   4   1   0 1032.50   84.99
  -4   1   0  904.41   82.79
  -4   1   0 1121.69   85.39
  -5  -1   0  596.74   51.89
  -5  -1   0  591.84   50.79
  -5  -1   0  506.05   52.19
   5  -1   0  573.74   49.20
   5  -1   0  549.35   52.79
  -5  -1   0  583.04   51.29
  -5  -1   0  552.54   51.29
  -5  -1   0  555.74   52.59
  -5  -1   0  594.54   51.69
  -5  -1   0  504.05   53.29
   5  -1   0  595.64   52.59
   5  -1   0  503.15   51.49
  -5  -1   0  542.65   54.29
   5  -1   0  564.24   52.49
  -5  -1   0  502.15   50.09
   5  -1   0  585.64   51.09
  -5  -1   0  556.04   49.20
   5  -1   0  601.34   52.29
  -5   1   0  599.74   50.79
  -5   1   0  598.54   51.89
  -5   1   0  615.64   56.99
  -5   1   0  617.34   51.69
  -5   1   0  562.14   53.99
  -5   1   0  565.44   53.89
  -5   1   0  630.34   51.89
   5   1   0  506.35   47.50
  -5   1   0  585.04   51.19
   5   1   0  561.64   54.59
  -5   1   0  571.84   47.30
  -5   1   0  503.65   79.69
   5   1   0  603.14   54.59
   5   1   0  532.85   50.49
  -5   1   0  633.44   52.89
  -5   1   0  592.64   50.09
   5   1   0  539.15   47.90
   5   1   0  502.15   53.09
   5   1   0  412.76   81.79
   5   1   0  510.15   52.19
   5   1   0  515.55   51.39
   5   1   0  521.05   51.79
  -6  -1   0  109.69   16.40
   6  -1   0  135.59   18.30
   6  -1   0  105.69   23.00
  -6  -1   0   78.29   18.80
  -6  -1   0  149.79   21.40
  -6  -1   0   68.49   19.50
   6  -1   0   82.99   19.90
   6  -1   0   97.19   22.70
  -6  -1   0  109.39   24.30
  -6  -1   0  137.69   21.60
   6  -1   0   67.89   18.80
  -6  -1   0  114.49   20.90
  -6  -1   0  125.19   24.90
   6  -1   0   99.49   20.40
  -6  -1   0  104.89   20.10
  -6  -1   0  130.19   20.90
  -6  -1   0   72.59   49.10
   6  -1   0  103.49   20.80
  -6  -1   0   66.19   22.20
  -6   1   0  108.19   19.90
  -6   1   0   92.99   19.20
  -6   1   0  138.59   22.60
   6   1   0   82.49    9.80
  -6   1   0  120.19   15.10
  -6   1   0   83.89   20.90
  -6   1   0   80.49   21.20
  -6   1   0  121.59   24.60
  -6   1   0   48.50   35.70
  -6   1   0   87.79   19.70
   6   1   0  105.79   21.80
  -6   1   0  108.49   18.40
   6   1   0  134.09   25.10
   6   1   0  100.49   23.30
   6   1   0   92.69   19.40
  -6   1   0  103.59   20.30
   6   1   0   76.79   18.20
  -6   1   0  127.99   19.30
   6   1   0   89.69   22.40
  -6   1   0  121.49   25.60
  -6   1   0  114.79   20.90
   6   1   0  113.19   23.40
  -7  -1   0  762.02   70.29
  -7  -1   0  642.14   68.39
  -7  -1   0  712.93   65.39
  -7  -1   0  728.43   67.89
  -7  -1   0  630.74   66.89
   7  -1   0  695.13   65.79
  -7  -1   0  663.73   65.69
  -7  -1   0  736.33   66.19
   7  -1   0  674.63   66.39
   7  -1   0  701.83   67.49
   7  -1   0  784.32   67.59
  -7  -1   0  744.13   63.89
  -7  -1   0  789.22   66.99
  -7  -1   0  811.22   64.19
  -7  -1   0  726.83   66.59
   7  -1   0  729.63   67.19
   7  -1   0  699.23   67.69
  -7   1   0  774.52   67.59
  -7   1   0  761.22   69.59
  -7   1   0  700.63   65.49
   7   1   0  681.63   66.99
  -7   1   0  760.42   65.69
  -7   1   0  705.93   60.79
   7   1   0  663.33   68.39
  -7   1   0  761.02   62.59
  -7   1   0  735.73   64.39
   7   1   0  691.63   67.59
  -7   1   0  782.62   69.89
   7   1   0  632.44   87.69
  -7   1   0  837.42   67.29
  -7   1   0  680.03   67.99
  -7   1   0  763.22   68.29
   7   1   0  642.14   67.09
   7   1   0  704.93   65.39
   7   1   0  644.34   66.29
   7   1   0  749.73   67.99
   8  -1   0   15.40   14.90
   8  -1   0   45.70   17.90
   8  -1   0   32.10   15.30
  -8  -1   0   51.09   15.30
  -8  -1   0   64.19   17.20
  -8  -1   0   58.79   15.40
  -8  -1   0   38.30   16.20
  -8  -1   0   19.40   11.80
  -8  -1   0   27.60   16.70
  -8  -1   0   35.40   15.50
  -8  -1   0   27.40   15.50
  -8  -1   0   52.49   22.50
  -8  -1   0   47.60   17.90
  -8  -1   0   59.29   15.50
  -8  -1   0   64.19   21.70
   8  -1   0   31.60   16.00
  -8   1   0   25.20   14.00
  -8   1   0   16.80   19.00
  -8   1   0   39.10   17.20
  -8   1   0   55.69   15.40
  -8   1   0   57.49   13.30
  -8   1   0   49.70   15.60
  -8   1   0   45.90    9.20
   8   1   0   45.80   20.50
  -8   1   0   27.50   13.30
   8   1   0   47.00   15.40
  -8   1   0   33.70   17.30
   8   1   0   54.49   19.20
   8   1   0   35.30   16.90
   8   1   0   26.20   15.90
  -8   1   0   32.40   12.80
   8   1   0   22.60   15.40
  -8   1   0    7.30   14.80
  -8   1   0   38.20   18.40
  -8   1   0   36.30   13.80
  -8   1   0   53.99   17.90
   9  -1   0   29.10   19.50
  -9  -1   0   -2.60   13.30
  -9  -1   0   18.70   18.10
   9  -1   0   32.70   19.00
   9  -1   0  -23.70   13.90
  -9  -1   0  -13.30   13.50
   9  -1   0  -20.50   12.80
  -9  -1   0   -2.00   14.10
   9  -1   0  -19.70   11.80
  -9  -1   0    2.60   20.20
  -9  -1   0   15.70   11.30
  -9  -1   0    8.20   20.40
  -9  -1   0   16.20   16.30
  -9  -1   0    2.80    9.30
  -9   1   0  -11.00   15.00
  -9   1   0   12.80   16.50
   9   1   0   20.90   19.90
   9   1   0   17.30   13.70
  -9   1   0   -5.80    6.50
  -9   1   0   20.00   12.00
  -9   1   0  -17.90   12.80
  -9   1   0   -5.90   11.80
   9   1   0    4.10   15.30
  -9   1   0    5.00   16.00
  -9   1   0   -2.20   15.80
  -9   1   0   -0.40   10.50
   9   1   0  133.89   62.99
  -9   1   0    7.20   15.40
   9   1   0   25.50   15.40
   9   1   0  -14.00   14.60
   9   1   0   34.60   16.60
   9   1   0   -1.50   16.50
  -9   1   0   17.70   15.90
  10  -1   0   49.10   21.10
  10  -1   0   65.49   24.20
 -10  -1   0   23.00   23.10
 -10  -1   0   64.19   21.20
 -10  -1   0   19.20   19.50
 -10  -1   0  -23.10   16.70
 -10  -1   0   57.99   15.10
 -10  -1   0   60.09   18.00
 -10  -1   0   45.70   19.80
 -10  -1   0   24.80   19.60
  10  -1   0  -22.00   60.69
  10  -1   0   45.20   21.90
  10  -1   0   29.40   19.20
 -10  -1   0   22.20   18.70
  10  -1   0   28.00   17.70
 -10   1   0   31.40    9.50
 -10   1   0    7.20   19.10
 -10   1   0   64.69   16.90
  10   1   0   22.30   18.00
 -10   1   0   37.90   22.10
 -10   1   0   60.99   24.50
 -10   1   0   42.20   17.70
  10   1   0   51.29   19.60
  10   1   0   91.29   65.09
  10   1   0   35.50   20.20
 -10   1   0   43.70   19.00
  10   1   0   39.50   18.50
  10   1   0   41.60   25.10
 -10   1   0   24.20   12.50
 -10   1   0   49.70   22.60
 -10   1   0   36.40   21.10
 -10   1   0   22.20   21.90
  11  -1   0  105.69   28.70
 -11  -1   0  103.29   27.50
  11  -1   0   67.89   24.30
 -11  -1   0   88.09   17.80
 -11  -1   0   64.99   24.40
 -11  -1   0   77.49   18.60
  11  -1   0   87.39   27.10
 -11  -1   0  118.29   28.50
 -11  -1   0  126.49   33.90
 -11  -1   0   54.19   27.80
 -11  -1   0   45.30   23.80
 -11  -1   0   69.09   24.40
  11   1   0   49.50   24.80
 -11   1   0   86.49   30.40
  11   1   0  120.59   85.19
 -11   1   0   47.80   26.60
 -11   1   0   68.59   23.30
 -11   1   0   62.99   11.60
 -11   1   0   81.39   26.30
 -11   1   0  109.59   26.40
  11   1   0  104.19   37.00
 -11   1   0   78.39   26.70
  11   1   0   70.89   24.90
 -11   1   0   63.79   22.70
 -12  -1   0   -2.40   21.60
 -12  -1   0   12.00   19.90
  12  -1   0    0.50   15.80
 -12  -1   0   -0.10   20.50
  12  -1   0  -22.00   18.40
 -12  -1   0    4.70   22.70
  12  -1   0   11.80   17.80
 -12  -1   0    9.90   11.70
 -12  -1   0   10.00   18.80
  12  -1   0  -25.30   16.60
  12   1   0    0.90   19.50
 -12   1   0   -7.80   17.70
 -12   1   0   62.79   25.20
  12   1   0    8.50   20.90
  12   1   0  -12.60   25.60
 -12   1   0   21.30   21.20
 -12   1   0    1.40   20.50
 -12   1   0   12.20   20.60
 -12   1   0   26.00   24.90
 -12   1   0    3.20   20.00
 -12   1   0  -21.20   17.50
  13  -1   0   33.10   25.50
 -13  -1   0   31.90   13.80
  13  -1   0   35.20   34.60
 -13  -1   0    4.60   22.40
 -13  -1   0  -23.20   18.00
  13  -1   0   17.20   18.50
  13  -1   0   38.70   24.90
 -13  -1   0   63.99   27.40
 -13  -1   0   -9.20   22.30
 -13  -1   0   28.50   20.10
  13   1   0   13.40   21.90
 -13   1   0    1.30   22.70
  13   1   0   14.90   21.80
 -13   1   0   39.30   24.80
 -13   1   0   62.49   42.50
  13   1   0   53.29   26.00
  13   1   0   10.30   29.30
 -13   1   0    8.20   21.90
 -13   1   0   28.90   22.30
 -14  -1   0   -1.20   12.70
 -14  -1   0   25.20   22.70
 -14  -1   0   39.20   15.70
  14  -1   0   -7.20   26.40
 -14  -1   0   11.10   22.70
 -14  -1   0   29.00   21.50
  14  -1   0   13.80   17.40
  14  -1   0    9.80   18.70
 -14  -1   0   16.50   27.80
  14  -1   0    2.10   20.90
 -14   1   0    1.70   20.20
 -14   1   0    9.40   26.50
 -14   1   0   90.49   30.00
  14   1   0    1.00   18.40
  14   1   0  -55.09  111.19
 -14   1   0   16.40   20.90
  14   1   0  -31.20   30.30
  14   1   0   14.70   23.40
 -14   1   0   16.80   24.30
 -15  -1   0   16.90   23.10
 -15  -1   0   51.89   29.60
 -15  -1   0    9.00   22.60
 -15  -1   0   10.50   28.60
  15  -1   0   14.00   25.10
  15  -1   0   34.20   28.30
 -15  -1   0   61.79   33.20
 -15   1   0   -2.70   24.80
 -15   1   0  -28.80   24.20
 -15   1   0   20.50   29.60
 -15   1   0    5.90   22.80
 -15   1   0   50.39   27.30
  15   1   0   33.00   32.70
  16  -1   0   27.50   22.50
 -16  -1   0   68.79   31.30
  16  -1   0  -32.80   25.50
 -16  -1   0   55.09   31.10
 -16  -1   0   14.30   25.00
 -16  -1   0   26.60   29.60
 -16   1   0   30.20   27.10
 -16   1   0   -0.80   29.30
 -16   1   0   33.30   35.60
  16   1   0   58.29   39.00
 -16   1   0   44.80   30.40
   0  -2   0 1435.66  109.29
   0  -2   0 1287.37  109.59
   0  -2   0 1418.96  109.79
   0  -2   0 1277.37  111.59
   0  -2   0 1394.26  108.99
   0  -2   0 1316.07  110.59
   0  -2   0 1271.87  109.29
   0  -2   0 1502.65  108.99
   0  -2   0 1375.26  111.99
   0   2   0 1334.57  109.69
   0   2   0 1278.27  108.69
   0   2   0 1342.77  108.19
   0   2   0 1356.26  111.79
   0   2   0 1371.96  108.59
   0   2   0 1218.28  109.29
   0   2   0 1353.66  109.19
   0   2   0 1363.56  108.79
   0   2   0 1420.06  109.79
   0   2   0 1390.26  110.99
   0   2   0 1216.28  111.19
  -1  -2   0  536.05   47.70
  -1  -2   0  494.65   46.30
  -1  -2   0  626.04   48.90
   1  -2   0  538.35   46.20
  -1  -2   0  504.75   48.60
   1  -2   0  586.44   47.80
   1  -2   0  534.25   47.60
   1   2   0  686.23   50.79
   1   2   0  482.25   54.59
   1   2   0  595.14   50.69
   1   2   0  663.73   47.50
   1   2   0  468.15   47.70
   1   2   0  662.03   50.09
  -1   2   0  537.25   48.10
  -1   2   0  477.35   45.80
   1   2   0  442.96   47.20
  -1   2   0  596.44   46.40
  -2  -2   0   86.09   15.60
   2  -2   0   57.29   18.70
   2  -2   0   82.19   17.80
  -2  -2   0   90.09   14.70
  -2  -2   0   50.59   17.70
  -2  -2   0   97.59   18.70
  -2  -2   0   75.99   17.10
  -2  -2   0   67.69   18.80
  -2  -2   0   73.69   12.80
   2  -2   0   60.89   10.20
   2  -2   0   64.49   11.40
   2  -2   0  119.29   19.40
   2  -2   0   64.29   15.00
   2  -2   0   76.39   12.40
   2  -2   0   68.29   13.20
  -2  -2   0   84.49   11.90
   2  -2   0   78.29   12.30
   2  -2   0   79.79   12.70
   2   2   0   95.49   18.40
   2   2   0   74.59   16.40
   2   2   0   93.59   19.90
  -2   2   0   82.79   12.80
   2   2   0   82.89   12.40
   2   2   0   97.99   21.10
  -2   2   0   83.79   13.00
  -2   2   0   83.39   12.80
   2   2   0   89.69   12.70
  -2   2   0   73.29   20.40
   2   2   0   95.79   12.30
   2   2   0   82.59   17.50
  -2   2   0   64.49   17.80
  -2   2   0   90.99   18.20
  -2   2   0  103.09   14.10
  -2   2   0   62.59   11.30
  -2   2   0   77.49   15.10
  -2   2   0   50.39    9.80
   2   2   0   69.39   13.60
   3  -2   0 2381.06  179.18
  -3  -2   0 2048.99  178.28
  -3  -2   0 2037.10  178.18
  -3  -2   0 2254.77  184.38
  -3  -2   0 2384.16  184.68
  -3  -2   0 2363.36  182.98
   3  -2   0 2274.17  181.48
  -3  -2   0 2134.39  184.08
   3  -2   0 2059.69  178.18
  -3  -2   0 2533.95  181.58
  -3  -2   0 2232.28  180.28
   3  -2   0 2258.87  179.58
  -3  -2   0 2209.58  180.98
  -3  -2   0 2248.08  182.18
   3  -2   0 2139.09  181.18
   3  -2   0 2271.97  183.08
   3  -2   0 2105.59  181.08
   3  -2   0 2188.48  181.38
  -3  -2   0 2188.18  181.48
   3  -2   0 2299.37  178.78
  -3   2   0 2430.46  181.78
  -3   2   0 2003.90  182.48
   3   2   0 2430.06  189.48
   3   2   0 2471.85  184.88
   3   2   0 2077.29  180.38
   3   2   0 2464.75  180.88
  -3   2   0 2431.76  181.68
  -3   2   0 2102.29  178.48
  -3   2   0 2101.29  181.18
  -3   2   0 2099.69  182.88
   3   2   0 2429.86  184.58
  -3   2   0 2184.28  182.18
  -3   2   0 1984.10  181.18
   3   2   0 2508.95  181.98
  -3   2   0 2077.29  179.88
  -3   2   0 2268.87  181.18
   3   2   0 2256.37  178.38
  -3   2   0 2363.56  181.58
   3   2   0 2176.48  182.08
   3   2   0 2016.80  183.48
  -4  -2   0  181.38   18.10
   4  -2   0  125.59   21.60
  -4  -2   0  101.89   14.00
   4  -2   0  105.99   17.60
   4  -2   0  106.79   18.20
  -4  -2   0  169.18   26.70
  -4  -2   0  145.59   49.10
   4  -2   0  102.79   18.10
  -4  -2   0  125.39   19.70
   4  -2   0  140.39   21.60
  -4  -2   0  160.78   18.50
  -4  -2   0  142.59   19.70
   4  -2   0  147.49   17.30
  -4  -2   0  152.28   20.20
   4  -2   0  113.89   12.70
  -4  -2   0  114.49   12.50
  -4  -2   0  178.38   27.90
   4   2   0   85.29   46.40
  -4   2   0  145.99   17.30
  -4   2   0  127.99   15.10
  -4   2   0  156.48   20.20
   4   2   0  121.39   20.40
  -4   2   0  112.49   37.10
  -4   2   0  128.89   23.10
  -4   2   0  139.09   23.90
   4   2   0  168.78   21.90
   4   2   0  196.88   22.00
  -4   2   0  142.49   22.10
  -4   2   0  109.69   19.50
   4   2   0  151.58   17.40
  -4   2   0  110.89   13.20
   4   2   0  186.98   27.00
   4   2   0  116.99   24.60
  -4   2   0  117.29   19.60
  -4   2   0  105.79   20.90
   4   2   0  141.39   17.10
   4   2   0  172.58   26.70
  -4   2   0  122.19   19.50
  -4   2   0  118.19   20.10
  -4   2   0  137.39   21.60
   4   2   0  153.78   21.10
  -4   2   0  137.89   19.70
  -5  -2   0  248.78   30.30
  -5  -2   0  236.08   35.60
   5  -2   0  208.08   25.10
   5  -2   0  263.17   35.20
  -5  -2   0  226.78   26.50
  -5  -2   0  243.68   27.00
   5  -2   0  284.07   29.40
   5  -2   0  264.97   28.80
  -5  -2   0  234.08   36.10
   5  -2   0  256.97   29.60
  -5  -2   0  216.18   28.70
  -5  -2   0  230.78   28.60
  -5  -2   0  225.18   26.40
  -5  -2   0  247.38   28.60
   5  -2   0  223.48   28.00
   5  -2   0  294.67   48.40
  -5  -2   0  288.07   27.80
  -5  -2   0  204.18   23.80
   5   2   0  281.97   26.90
  -5   2   0  190.78   26.50
  -5   2   0  240.58   27.50
  -5   2   0  221.18   27.00
  -5   2   0  252.77   26.00
  -5   2   0  280.07   63.69
   5   2   0  258.27   25.60
   5   2   0  212.68   29.70
  -5   2   0  250.77   31.70
  -5   2   0  244.98   22.30
  -5   2   0  190.88   25.60
  -5   2   0  277.37   30.30
   5   2   0  259.67   28.80
  -5   2   0  298.17   28.80
   5   2   0  326.27   65.89
  -5   2   0  237.78   31.80
  -5   2   0  271.17   30.00
   5   2   0  245.98   27.90
   5   2   0  237.78   28.00
   5   2   0  270.87   32.70
   5   2   0  287.37   30.10
   5   2   0  128.99   32.80
  -5   2   0  273.27   28.00
  -5   2   0  238.28   31.20
  -6  -2   0  130.19   21.40
  -6  -2   0  137.59   21.50
   6  -2   0  128.59   23.10
   6  -2   0   76.59   19.50
  -6  -2   0  116.59   27.20
  -6  -2   0  151.48   30.00
  -6  -2   0  105.49   19.20
  -6  -2   0  104.79   22.90
   6  -2   0   81.39   19.90
  -6  -2   0  116.89   16.60
  -6  -2   0  108.39   22.00
   6  -2   0  110.59   22.00
   6  -2   0  149.59   21.90
  -6  -2   0  158.98   27.40
  -6  -2   0  141.49   22.30
  -6  -2   0  154.58   23.10
   6  -2   0  122.99   19.40
  -6  -2   0  112.49   19.90
  -6   2   0  117.79   20.40
  -6   2   0  120.59   21.80
  -6   2   0  125.99   43.90
   6   2   0  154.38   22.10
  -6   2   0  119.69   19.20
  -6   2   0  105.79   21.50
   6   2   0  139.99   27.80
  -6   2   0  121.39   23.00
  -6   2   0   96.79   19.10
  -6   2   0  119.99   19.80
   6   2   0  150.68   25.50
  -6   2   0  129.09   25.60
  -6   2   0  147.79   22.70
  -6   2   0  106.89   13.60
  -6   2   0  105.29   20.90
   6   2   0  111.59   26.00
  -6   2   0   99.19   24.20
   6   2   0  109.69   24.40
   6   2   0  129.49   18.10
  -6   2   0  116.59   13.30
   6   2   0  109.49   20.90
  -6   2   0  130.59   23.50
   7  -2   0   10.20   11.30
   7  -2   0   31.00   13.50
   7  -2   0   12.30   13.20
   7  -2   0   28.70   12.70
   7  -2   0    7.30   13.30
  -7  -2   0   16.60   12.50
  -7  -2   0   22.40   19.00
  -7  -2   0   24.00   13.00
   7  -2   0    8.90   12.60
  -7  -2   0   12.90   12.80
  -7  -2   0   30.10   14.00
   7  -2   0   13.40   13.40
  -7  -2   0   38.00   20.20
  -7  -2   0   10.70   13.90
  -7  -2   0   -0.30    6.70
  -7  -2   0   16.80   10.90
  -7  -2   0   13.80   13.20
  -7   2   0    7.90   13.70
  -7   2   0   19.70   14.40
  -7   2   0   15.40    5.80
  -7   2   0   20.40   15.10
  -7   2   0    5.40   12.20
   7   2   0    9.90    7.00
   7   2   0    7.00   11.60
  -7   2   0   14.40   11.20
  -7   2   0    9.50   12.20
   7   2   0   27.10   15.30
   7   2   0   19.80    8.00
  -7   2   0   29.70   12.40
  -7   2   0   12.10   10.00
   7   2   0   20.50   16.20
  -7   2   0   -5.40    7.80
   7   2   0   19.90   17.70
  -7   2   0   13.70   11.80
  -7   2   0   41.00   34.90
  -7   2   0   19.70    6.00
   7   2   0    9.30   14.60
   7   2   0    1.60   10.70
  -7   2   0    8.20   11.70
  -7   2   0   11.10   10.10
  -8  -2   0   31.80   14.00
   8  -2   0   64.89   23.50
  -8  -2   0   45.10   22.70
   8  -2   0   37.20   15.30
  -8  -2   0   50.69   15.40
   8  -2   0  161.68   51.29
  -8  -2   0   66.49   16.30
  -8  -2   0   37.40   16.50
   8  -2   0   74.79   19.70
   8  -2   0   72.49   16.10
  -8  -2   0   46.20   16.40
  -8  -2   0   34.50   14.20
  -8  -2   0   43.70   21.30
  -8  -2   0   43.30   16.70
   8  -2   0   51.99   20.80
  -8  -2   0   46.30   12.70
  -8  -2   0   54.99   19.10
  -8   2   0   40.00   13.10
  -8   2   0   64.79   17.20
  -8   2   0   36.40    7.60
   8   2   0   23.40   20.80
  -8   2   0   36.60   20.60
  -8   2   0   49.00   16.50
   8   2   0   52.29   15.40
   8   2   0   48.50   18.60
   8   2   0    8.90   49.00
   8   2   0   35.40   16.20
  -8   2   0   45.40   14.30
  -8   2   0   56.89   16.60
  -8   2   0   43.70   15.90
  -8   2   0   57.79   19.50
   8   2   0   23.20   15.70
  -8   2   0   36.30   16.70
  -8   2   0   41.20   14.00
  -8   2   0   51.19   14.70
  -8   2   0   45.90    8.50
  -8   2   0   82.19   22.20
   9  -2   0  289.07   36.90
  -9  -2   0  263.37   37.10
  -9  -2   0  250.37   38.80
  -9  -2   0  264.77   50.49
   9  -2   0  246.88   36.30
  -9  -2   0  261.67   37.40
  -9  -2   0  261.17   40.30
  -9  -2   0  225.08   31.90
  -9  -2   0  316.07   47.40
   9  -2   0  235.68   36.70
   9  -2   0  275.27   39.50
  -9  -2   0  179.88   34.60
  -9  -2   0  239.48   27.70
  -9   2   0  258.67   31.50
   9   2   0  244.28   38.70
  -9   2   0  269.87   39.60
  -9   2   0  324.37   41.70
  -9   2   0  212.58   21.30
   9   2   0  148.69   31.90
   9   2   0  206.98   41.40
   9   2   0  205.18   37.30
  -9   2   0  225.68   29.40
  -9   2   0  293.17   31.20
  -9   2   0  275.77   41.80
  -9   2   0  262.17   38.60
  -9   2   0  230.98   28.10
   9   2   0  287.87   40.40
  -9   2   0  211.08   36.00
  -9   2   0  328.67   42.40
  -9   2   0  212.88   21.20
   9   2   0  209.78   33.80
   9   2   0  163.78   98.09
 -10  -2   0    3.00   19.70
  10  -2   0   47.20   21.30
  10  -2   0   34.20   19.80
  10  -2   0   48.00   20.50
  10  -2   0   35.40   17.20
 -10  -2   0   65.49   30.20
 -10  -2   0    9.60   16.80
 -10  -2   0   40.80   21.00
 -10  -2   0   57.69   27.00
 -10  -2   0   32.90   13.10
 -10  -2   0   55.69   17.10
 -10  -2   0   50.69   21.40
 -10   2   0    2.60   18.40
 -10   2   0   27.30   14.90
 -10   2   0    9.70   19.10
  10   2   0   11.80   26.20
 -10   2   0   13.40   18.10
 -10   2   0   38.60   20.90
 -10   2   0   38.90   18.20
  10   2   0  187.58   79.99
 -10   2   0   25.70   16.80
  10   2   0   66.79   22.20
 -10   2   0   13.00   20.10
  10   2   0   27.20   19.10
  10   2   0   33.70   19.30
 -11  -2   0   73.29   22.40
 -11  -2   0   49.40   17.80
  11  -2   0   71.59   27.20
 -11  -2   0  104.99   25.90
 -11  -2   0   84.69   17.00
  11  -2   0   23.40   17.60
  11  -2   0   55.09   23.90
 -11  -2   0   49.20   25.00
 -11  -2   0   69.59   24.80
 -11  -2   0   42.40   24.60
  11  -2   0   70.69   24.00
 -11  -2   0   82.79   31.50
 -11   2   0   76.39   26.60
  11   2   0  100.19   26.80
 -11   2   0   78.59   17.60
 -11   2   0   74.49   26.70
 -11   2   0   35.40   23.20
 -11   2   0   49.10   24.60
  11   2   0   85.19   31.80
  11   2   0   44.40   22.30
 -11   2   0   75.79   26.90
 -11   2   0   99.09   26.10
  11   2   0   80.89   26.20
 -12  -2   0   31.70   25.70
 -12  -2   0   12.30   20.50
  12  -2   0  -24.90   13.50
  12  -2   0    6.40   20.40
 -12  -2   0    7.50   21.30
 -12  -2   0  -11.00   23.50
 -12  -2   0   22.90   15.10
 -12  -2   0   18.40   15.50
  12  -2   0   -6.50   15.90
 -12  -2   0    5.60   18.70
  12  -2   0   12.20   18.50
  12   2   0   29.20   21.60
 -12   2   0   28.90   24.70
  12   2   0   27.20   28.50
 -12   2   0   -2.70   20.30
 -12   2   0   -2.20   18.10
 -12   2   0   19.50   13.00
 -12   2   0   26.00   23.60
 -12   2   0  -13.50   19.60
  12   2   0    8.20   21.90
  12   2   0  159.08  102.29
 -12   2   0   13.40   20.90
 -12   2   0    8.60   20.10
 -13  -2   0   41.50   27.30
 -13  -2   0   23.20   20.50
 -13  -2   0   12.60   22.30
  13  -2   0   22.20   18.00
 -13  -2   0   26.10   22.60
 -13   2   0  -12.20   24.80
  13   2   0   18.60   26.00
 -13   2   0    2.20   19.80
  13   2   0  -54.49   99.69
 -13   2   0   16.70   25.20
 -13   2   0   18.80   24.50
 -14  -2   0   45.60   29.20
  14  -2   0    0.60   22.80
  14  -2   0   -6.80   16.10
 -14  -2   0   10.20   20.20
 -14  -2   0   39.40   28.90
 -14  -2   0   12.20   24.20
  14  -2   0   13.20   25.20
 -14  -2   0   11.60   17.50
  14   2   0   49.60   27.70
 -14   2   0   13.40   21.10
 -14   2   0   31.30   26.00
  14   2   0  235.28  125.19
 -14   2   0   -0.90   22.20
 -14   2   0   47.00   26.90
 -14   2   0    9.00   23.70
  14   2   0   -8.60   19.20
  14   2   0  -36.40   31.00
 -15  -2   0    4.50   26.60
  15  -2   0   74.89   32.00
 -15  -2   0   32.00   29.20
 -15  -2   0   77.99   26.70
 -15  -2   0   46.80   26.40
  15  -2   0   23.90   23.10
 -15   2   0   74.09   31.30
  15   2   0  130.69   38.20
 -15   2   0   41.90   24.30
 -15   2   0   14.90   28.90
 -15   2   0  109.59   34.10
 -15   2   0   39.40   28.80
  16  -2   0   60.99   25.70
 -16  -2   0  -13.50   27.50
  16  -2   0  -29.40   25.50
 -16  -2   0    1.70   18.30
 -16  -2   0    2.60   29.00
 -16  -2   0   52.59   26.40
 -16   2   0  100.19   32.50
 -16   2   0   26.10   28.70
 -16   2   0    8.80   26.10
  16   2   0   34.10   41.60
 -16   2   0   18.20   25.30
   0  -3   0  -12.00   17.00
   0  -3   0  -15.30    9.10
   0  -3   0    2.90    7.30
   0  -3   0  -23.20    9.30
   0  -3   0  -10.70    8.20
   0  -3   0   -5.90    6.40
   0  -3   0   15.10   16.50
   0  -3   0   -6.10   12.00
   0  -3   0   -5.50   10.50
   0   3   0  -21.10   15.10
   0   3   0   -8.00   14.20
   0   3   0  -10.50   13.10
   0   3   0  -20.60    9.90
   0   3   0   -3.30    8.00
   0   3   0  -21.70    7.80
   0   3   0    3.30    7.10
   0   3   0   -4.80    6.90
   0   3   0   -7.80    5.70
   0   3   0  -22.40    9.20
   0   3   0   -5.70    5.20
  -1  -3   0  143.29   24.50
   1  -3   0  149.88   22.70
  -1  -3   0  147.89   19.80
  -1  -3   0  146.29   15.60
  -1  -3   0  125.99   17.40
  -1  -3   0  123.19   26.40
   1  -3   0  127.59   16.60
   1  -3   0  105.19   17.00
   1  -3   0  111.19   16.30
   1  -3   0  155.78   22.10
   1  -3   0  113.89   15.10
  -1  -3   0  131.79   26.00
  -1  -3   0  145.89   20.60
  -1  -3   0  151.98   21.30
   1  -3   0  152.48   24.90
  -1  -3   0  140.49   19.00
   1  -3   0  114.29   16.00
   1  -3   0  114.59   15.50
   1  -3   0  135.29   17.50
  -1  -3   0  128.19   16.80
   1  -3   0  148.89   25.60
   1   3   0  102.69   20.00
   1   3   0  113.49   25.00
  -1   3   0  114.49   15.20
  -1   3   0  129.29   24.70
  -1   3   0  130.19   15.80
  -1   3   0  112.49   14.80
   1   3   0  135.49   15.70
   1   3   0  108.79   20.50
   1   3   0  126.39   14.40
  -1   3   0  145.59   18.20
  -1   3   0  134.19   24.10
   1   3   0  185.78   21.20
  -1   3   0   82.39   19.60
  -1   3   0  145.29   24.10
  -1   3   0  114.49   16.60
   1   3   0   80.49   21.40
   1   3   0   94.29   11.50
  -1   3   0  129.39   16.20
   1   3   0  126.59   17.20
  -1   3   0  121.59   18.00
   2  -3   0   52.89   11.00
  -2  -3   0   16.60   11.80
   2  -3   0   67.59   11.60
   2  -3   0   68.59    8.00
  -2  -3   0   44.90   12.20
   2  -3   0   52.89   11.40
  -2  -3   0   35.00   17.70
  -2  -3   0   43.60   10.00
  -2  -3   0   52.19   18.40
  -2  -3   0   28.50   10.80
   2  -3   0   54.99   16.80
  -2  -3   0   41.80   19.10
   2  -3   0   54.29   11.80
   2  -3   0   61.49   21.90
   2  -3   0   40.70   14.50
  -2  -3   0   45.90   13.40
  -2  -3   0   82.19   19.90
  -2   3   0   60.59   11.20
  -2   3   0   64.09   11.40
   2   3   0   17.20   13.70
  -2   3   0   70.39   13.30
  -2   3   0   38.10   15.20
  -2   3   0   32.10   16.40
   2   3   0   42.20   14.00
  -2   3   0   49.50    8.10
   2   3   0   40.50   15.00
  -2   3   0   36.00   18.20
   2   3   0   31.30   18.90
   2   3   0   52.39   17.90
   2   3   0   40.40   19.10
   2   3   0   67.79   11.60
   2   3   0   57.89   13.40
   2   3   0   55.59   10.90
  -2   3   0   53.99   21.20
  -2   3   0   77.19   12.90
   3  -3   0  266.57   32.10
   3  -3   0  277.87   25.80
  -3  -3   0  276.37   26.40
  -3  -3   0  264.87   32.90
   3  -3   0  276.87   32.90
   3  -3   0  275.97   26.80
   3  -3   0  284.47   27.80
   3  -3   0  224.98   27.50
  -3  -3   0  269.07   28.20
  -3  -3   0  289.27   30.40
   3  -3   0  273.27   28.30
  -3  -3   0  280.17   22.70
  -3  -3   0  270.57   26.70
   3  -3   0  310.17   30.90
  -3  -3   0  281.47   28.80
   3  -3   0  273.07   28.10
  -3  -3   0  273.47   35.30
  -3  -3   0  274.57   33.30
   3  -3   0  254.87   27.70
  -3  -3   0  276.87   31.50
  -3   3   0  252.17   32.00
   3   3   0  247.98   31.40
  -3   3   0  257.47   30.30
  -3   3   0  286.07   28.60
  -3   3   0  271.97   29.70
   3   3   0  311.97   27.20
  -3   3   0  254.97   27.30
   3   3   0  269.97   26.40
   3   3   0  285.87   28.20
  -3   3   0  322.97   28.50
   3   3   0  272.57   30.70
  -3   3   0  314.87   28.60
  -3   3   0  284.47   33.40
  -3   3   0  266.07   25.70
   3   3   0  231.58   53.69
   3   3   0  299.47   33.70
  -3   3   0  265.07   38.80
   3   3   0  311.97   36.00
   3   3   0  287.87   28.40
  -3   3   0  293.87   27.40
   3   3   0  301.27   31.10
  -4  -3   0  330.67   34.30
   4  -3   0  353.66   34.60
  -4  -3   0  354.46   33.60
   4  -3   0  332.67   30.20
  -4  -3   0  354.36   34.20
  -4  -3   0  344.37   39.70
   4  -3   0  333.37   34.50
   4  -3   0  292.97   28.20
   4  -3   0  339.17   37.10
   4  -3   0  334.77   34.50
   4  -3   0  325.57   31.50
  -4  -3   0  331.87   28.80
   4  -3   0  361.96   35.40
  -4  -3   0  344.17   37.30
  -4  -3   0  318.17   30.10
   4  -3   0  384.06   31.20
  -4  -3   0  315.97   40.10
  -4  -3   0  344.07   32.60
   4  -3   0  310.17   36.70
  -4  -3   0  286.17   34.30
  -4  -3   0  347.87   39.00
  -4   3   0  371.66   34.40
  -4   3   0  346.77   33.00
  -4   3   0  393.46   34.50
   4   3   0  411.76   41.30
  -4   3   0  295.57   37.60
   4   3   0  302.77   38.60
   4   3   0  265.97   37.30
   4   3   0  330.37   30.10
  -4   3   0  360.36   36.70
   4   3   0  362.66   34.00
  -4   3   0  362.16   30.10
   4   3   0  332.47   36.40
  -4   3   0  331.07   50.99
  -4   3   0  339.27   38.20
  -4   3   0  328.57   35.50
  -4   3   0  348.47   35.90
  -4   3   0  431.56   35.30
   4   3   0  303.67   36.30
   4   3   0  347.97   32.60
  -4   3   0  350.06   33.70
   4   3   0  359.06   33.80
   5  -3   0  990.40   92.19
  -5  -3   0 1144.09   86.89
  -5  -3   0 1029.00   91.79
  -5  -3   0 1079.59   97.09
   5  -3   0 1087.99   93.19
  -5  -3   0 1030.40   92.69
  -5  -3   0 1057.69   94.39
   5  -3   0  951.20   87.39
   5  -3   0 1086.09   94.49
   5  -3   0 1004.20   94.49
  -5  -3   0 1149.58   93.79
  -5  -3   0 1137.79   87.59
   5  -3   0  971.80   92.09
  -5  -3   0 1054.29   97.79
  -5  -3   0 1085.39   97.39
  -5  -3   0 1098.29   92.09
  -5  -3   0 1018.40   90.79
   5  -3   0 1109.79   92.79
  -5  -3   0 1154.28   92.59
   5  -3   0  966.90   86.09
   5   3   0 1065.09   96.49
  -5   3   0 1067.69   92.69
  -5   3   0 1109.39   92.59
  -5   3   0 1070.09   94.19
   5   3   0  934.31   92.59
  -5   3   0 1163.38   87.39
   5   3   0 1086.89   90.79
   5   3   0 1099.09   93.29
  -5   3   0 1159.68   93.09
  -5   3   0 1051.09   90.69
   5   3   0  952.60  110.29
  -5   3   0 1052.09   92.59
  -5   3   0 1170.58   92.89
  -5   3   0 1035.00   95.29
   5   3   0 1113.19   94.09
   5   3   0 1142.39   91.29
   5   3   0 1078.79   96.89
  -5   3   0 1064.09   93.89
  -5   3   0 1032.40   93.19
   5   3   0 1087.09   96.89
  -5   3   0 1063.79   95.39
   5   3   0 1137.99   93.19
  -6  -3   0   58.49   15.30
   6  -3   0   43.60   17.40
  -6  -3   0   21.70   20.30
  -6  -3   0   37.70   13.10
   6  -3   0   33.70   15.90
  -6  -3   0   46.80   15.60
  -6  -3   0   46.40   17.30
  -6  -3   0   69.89   16.50
  -6  -3   0   63.59   19.50
  -6  -3   0   47.50   14.00
   6  -3   0   34.00   14.90
  -6  -3   0   35.10    9.30
   6  -3   0   37.30   10.50
  -6  -3   0   42.70   15.40
   6  -3   0   22.60   13.60
   6  -3   0   65.69   17.20
   6  -3   0   33.30   14.80
  -6  -3   0   43.50   20.20
  -6   3   0   45.60   14.90
  -6   3   0   55.29   19.00
   6   3   0   52.59   20.20
  -6   3   0   44.10   13.50
  -6   3   0   45.00    7.30
  -6   3   0   58.29   17.40
  -6   3   0   83.19   21.00
   6   3   0   44.40   20.80
  -6   3   0   57.59   21.10
  -6   3   0   29.10   12.50
   6   3   0   39.60   13.50
  -6   3   0   40.50   13.70
   6   3   0   21.20   15.90
  -6   3   0   51.89   17.70
  -6   3   0   16.20   38.30
   6   3   0   60.49   13.40
   6   3   0   29.60   14.30
   6   3   0   54.19   21.80
  -6   3   0   26.90   13.60
  -6   3   0   14.80   14.60
   6   3   0   32.80   49.20
  -6   3   0   39.40   12.00
   6   3   0   38.80   14.50
  -7  -3   0   69.99   17.60
   7  -3   0  102.59   21.10
  -7  -3   0   77.79   18.20
   7  -3   0   97.89   23.00
  -7  -3   0   89.49   23.50
   7  -3   0   68.39   19.60
   7  -3   0   64.59   19.20
   7  -3   0   93.09   16.30
  -7  -3   0  112.59   15.40
  -7  -3   0  134.29   28.50
   7  -3   0   79.69   21.20
  -7  -3   0   80.09   19.10
  -7  -3   0  103.19   20.90
   7  -3   0   77.59   19.90
  -7  -3   0  104.19   24.50
  -7  -3   0   69.49   20.30
  -7  -3   0   63.29   16.60
  -7  -3   0   87.19   26.10
  -7   3   0  107.99   25.50
   7   3   0   56.59   22.60
  -7   3   0  102.49   19.30
  -7   3   0   88.29   19.50
   7   3   0   74.99   23.40
  -7   3   0   66.49    9.00
   7   3   0  104.29   16.40
  -7   3   0  119.39   38.40
  -7   3   0   84.09    9.00
  -7   3   0  111.59   19.60
  -7   3   0   98.19   21.70
   7   3   0   65.59   23.30
   7   3   0   91.29   17.50
   7   3   0   89.09   21.20
  -7   3   0   97.89   23.40
  -7   3   0  105.89   22.20
  -7   3   0   88.59   20.20
  -7   3   0   70.49   22.20
  -7   3   0   69.39   20.30
   7   3   0   90.49   18.30
  -7   3   0   99.29   19.30
  -7   3   0   77.49   21.10
  -8  -3   0   -7.80    8.40
   8  -3   0   26.00   14.10
   8  -3   0  -11.10   12.10
  -8  -3   0   -3.30   10.00
   8  -3   0   22.10   15.80
  -8  -3   0    4.20   21.70
   8  -3   0  -24.30   10.80
  -8  -3   0  -16.80   12.90
  -8  -3   0   19.20   16.30
  -8  -3   0    7.70   12.10
  -8  -3   0   -5.40   10.70
   8  -3   0    9.70   14.00
   8  -3   0   -3.00   10.30
  -8  -3   0   30.20   16.40
  -8  -3   0   21.60    8.80
  -8  -3   0   11.40   18.40
  -8  -3   0   19.00   13.00
   8  -3   0   10.70   11.00
   8   3   0    3.40   14.80
  -8   3   0   11.70   15.10
   8   3   0  -20.50   13.30
  -8   3   0    1.50   14.50
  -8   3   0   -7.60   15.00
   8   3   0  -29.90   53.69
  -8   3   0    0.70   10.10
   8   3   0    9.60   15.30
   8   3   0   18.90   13.20
  -8   3   0   -7.20   11.00
  -8   3   0   17.90   13.20
  -8   3   0   14.40   15.10
   8   3   0    9.20   20.50
   8   3   0   -1.40    6.20
  -8   3   0   -5.60    9.80
  -8   3   0    0.60   10.50
   9  -3   0   28.10   20.40
  -9  -3   0   18.60   21.40
   9  -3   0   17.60   17.40
   9  -3   0   20.70   14.30
  -9  -3   0   16.90   17.70
  -9  -3   0   44.50   18.40
  -9  -3   0   37.70   10.30
  -9  -3   0   34.10   16.50
  -9  -3   0   28.40   22.60
   9  -3   0   22.40   17.90
  -9  -3   0   28.00   17.80
   9  -3   0   28.20   14.40
   9  -3   0   30.80   14.90
  -9  -3   0   21.70   21.60
  -9  -3   0   28.50   17.50
  -9   3   0   10.80   14.10
   9   3   0   49.30   20.20
  -9   3   0   31.20   19.20
   9   3   0   43.50   22.10
  -9   3   0   19.80   18.50
  -9   3   0   48.80   16.80
  -9   3   0   24.50   21.70
  -9   3   0   44.00   20.70
  -9   3   0   26.70   15.70
   9   3   0    9.20   18.30
   9   3   0   16.00   24.50
  -9   3   0   31.70   19.10
   9   3   0   26.90   62.99
   9   3   0   25.80   17.00
  10  -3   0   27.90   16.90
 -10  -3   0   -6.20   18.80
  10  -3   0   -1.40   18.00
 -10  -3   0    3.80   19.10
 -10  -3   0   11.70   16.60
  10  -3   0   25.70   16.90
  10  -3   0   18.20   19.20
 -10  -3   0    7.20   10.20
 -10  -3   0   -0.70   15.40
 -10  -3   0    7.30   16.00
 -10  -3   0   17.20   24.50
 -10  -3   0   27.80   19.30
 -10   3   0   12.50   18.60
  10   3   0    5.60   19.40
  10   3   0  207.88   85.69
  10   3   0  -24.00   14.90
 -10   3   0   20.70   19.50
 -10   3   0   12.60   23.40
 -10   3   0   -1.90   15.10
  10   3   0    4.90   19.90
 -10   3   0  -14.60   18.10
 -10   3   0  -11.40   16.20
 -10   3   0   25.10   16.90
 -11  -3   0   93.89   33.60
  11  -3   0   77.49   25.40
 -11  -3   0   63.39   28.00
 -11  -3   0   59.89   15.40
 -11  -3   0   71.29   23.70
  11  -3   0   55.99   26.50
  11  -3   0   36.90   73.39
  11  -3   0  106.39   24.20
 -11  -3   0   84.59   21.70
 -11  -3   0    8.50   22.10
 -11  -3   0   50.49   21.00
 -11  -3   0   88.59   27.90
 -11   3   0   90.69   22.90
 -11   3   0   52.09   24.60
  11   3   0   77.39   31.80
 -11   3   0   57.59   25.00
 -11   3   0   80.29   25.70
 -11   3   0   40.50   24.90
  11   3   0   85.89   33.50
 -11   3   0   80.89   25.40
  11   3   0   57.29   23.70
 -11   3   0   60.09   22.60
  11   3   0  145.79   83.69
 -12  -3   0   46.50   22.70
  12  -3   0   23.90   19.60
 -12  -3   0  120.09   33.30
 -12  -3   0   63.49   18.40
 -12  -3   0   31.90   24.60
 -12  -3   0   51.19   20.80
  12  -3   0   29.10   19.70
  12  -3   0   58.79   22.30
 -12  -3   0   42.50   23.90
  12  -3   0   68.89   27.60
 -12  -3   0   26.40   29.00
 -12   3   0   62.59   25.00
 -12   3   0   43.30   18.70
 -12   3   0   26.90   23.20
  12   3   0   16.00   23.80
 -12   3   0   23.30   24.90
  12   3   0   83.19   38.90
 -12   3   0  109.99   31.30
  12   3   0   49.99   23.20
 -12   3   0   27.20   21.60
  12   3   0   46.10   96.19
 -12   3   0   82.99   29.70
 -13  -3   0   63.99   25.80
 -13  -3   0   -5.80   19.90
  13  -3   0   10.30   24.10
 -13  -3   0  -18.50   33.60
  13  -3   0    0.50   18.40
  13  -3   0   35.20   25.60
 -13  -3   0  -44.20   22.90
 -13  -3   0   21.10   24.40
 -13  -3   0  -21.50   14.60
  13  -3   0   41.60   20.80
  13   3   0   15.40   28.50
  13   3   0   19.00   23.20
 -13   3   0   11.40   24.60
 -13   3   0   19.00   17.40
 -13   3   0  -10.80   17.90
  13   3   0   20.60   22.40
 -13   3   0  -31.70   20.30
 -13   3   0   11.80   22.00
 -14  -3   0   12.70   26.30
 -14  -3   0  -11.20   24.30
  14  -3   0   49.70   22.70
 -14  -3   0   72.19   33.60
 -14  -3   0    9.30   22.50
  14  -3   0    5.90   23.20
  14  -3   0   -6.20   18.60
 -14   3   0   46.70   15.70
 -14   3   0   49.80   22.90
 -14   3   0   21.70   25.90
 -14   3   0   19.80   21.40
  14   3   0   76.89   38.80
 -14   3   0    3.20   26.60
  14   3   0   11.70   22.80
 -14   3   0   20.20   23.10
 -15  -3   0   53.99   29.80
 -15  -3   0  110.59   32.10
 -15  -3   0   64.19   38.70
  15  -3   0  -12.30   19.10
  15  -3   0   88.79   32.90
 -15  -3   0   59.79   25.40
  15  -3   0   -2.40   25.40
 -15   3   0    8.60   26.40
 -15   3   0   68.59   30.70
 -15   3   0   72.59   26.80
 -15   3   0   52.89   26.30
  15   3   0   91.09   30.60
  15   3   0   47.50   40.90
 -16  -3   0   24.80   28.90
 -16  -3   0   38.80   27.20
 -16  -3   0   18.00   34.60
  16  -3   0   42.00   26.80
  16  -3   0   14.20   28.30
 -16  -3   0   12.80   31.10
 -16  -3   0   64.39   33.90
  16  -3   0   74.29   34.10
 -16   3   0   21.40   29.20
  16   3   0   99.09   49.99
 -16   3   0   40.70   27.50
 -16   3   0   16.70   25.70
 -16   3   0   17.00   27.30
   0  -4   0 7817.22  647.74
   0  -4   0 8350.16  653.23
   0  -4   0 9000.30  652.43
   0  -4   0 7790.92  648.24
   0  -4   0 8232.48  647.54
   0  -4   0 8974.40  654.03
   0  -4   0 7627.44  646.84
   0  -4   0 9088.09  651.63
   0   4   0 8973.80  653.53
   0   4   0 7657.23  648.64
   0   4   0 8914.01  648.24
   0   4   0 6867.81  645.54
   0   4   0 7759.52  647.34
   0   4   0 7294.67  648.14
   0   4   0 8230.58  647.14
   0   4   0 8226.28  653.03
   0   4   0 7958.20  651.23
   0   4   0 7659.63  648.64
  -1  -4   0  326.07   32.70
   1  -4   0  254.57   29.20
   1  -4   0  327.27   31.80
   1  -4   0  348.37   33.90
   1  -4   0  244.28   29.20
  -1  -4   0  302.47   28.90
   1  -4   0  252.37   40.00
  -1  -4   0  306.47   32.80
  -1  -4   0  348.87   28.30
   1  -4   0  382.46   40.40
   1  -4   0  238.78   28.10
  -1  -4   0  231.58   31.90
  -1  -4   0  273.97   38.90
  -1  -4   0  236.08   29.30
  -1  -4   0  267.37   40.90
  -1  -4   0  281.27   30.30
  -1  -4   0  272.87   45.80
   1  -4   0  322.47   38.40
   1   4   0  286.67   29.60
  -1   4   0  220.48   29.20
  -1   4   0  323.37   28.10
   1   4   0  200.48   33.90
  -1   4   0  249.08   38.50
   1   4   0  357.36   51.69
  -1   4   0  240.28   39.20
  -1   4   0  225.78   27.80
   1   4   0  270.57   40.90
  -1   4   0  284.37   29.30
   1   4   0  233.28   29.40
   1   4   0  358.46   29.20
  -1   4   0  315.57   29.60
  -1   4   0  316.77   38.00
   1   4   0  239.68   40.70
  -1   4   0  358.36   32.00
  -1   4   0  266.67   32.40
  -1   4   0  196.38   29.90
   1   4   0  246.08   32.00
   1   4   0  216.88   36.70
   1   4   0  225.28   24.40
   1   4   0  326.87   33.70
  -2  -4   0  403.16   37.60
  -2  -4   0  365.76   39.10
  -2  -4   0  404.66   37.90
  -2  -4   0  357.96   41.00
  -2  -4   0  375.86   43.90
   2  -4   0  385.16   43.00
   2  -4   0  432.76   35.80
   2  -4   0  514.65   41.90
  -2  -4   0  404.86   37.30
   2  -4   0  358.26   36.20
   2  -4   0  368.26   39.40
  -2  -4   0  366.96   43.10
  -2  -4   0  465.75   42.60
   2  -4   0  458.45   43.40
  -2   4   0  353.56   36.10
   2   4   0  320.37   40.50
  -2   4   0  406.86   43.70
   2   4   0  443.36   36.60
  -2   4   0  356.46   41.60
  -2   4   0  385.96   35.40
   2   4   0  455.05   37.50
   2   4   0  397.56   57.49
   2   4   0  310.17   39.90
  -2   4   0  318.67   35.80
   2   4   0  363.16   37.10
  -2   4   0  444.06   45.20
   2   4   0  447.56   44.10
   2   4   0  340.27   39.30
   2   4   0  328.97   31.20
   2   4   0  375.56   44.00
  -2   4   0  329.17   38.90
  -3  -4   0  -15.90   19.60
   3  -4   0   22.80   14.20
  -3  -4   0   -4.90   14.20
  -3  -4   0   26.60   12.20
   3  -4   0   16.00   10.00
   3  -4   0   21.20   10.90
  -3  -4   0   -2.60   19.10
   3  -4   0   22.90   10.30
   3  -4   0   38.80   20.20
  -3  -4   0   36.50   16.10
  -3  -4   0    8.50   11.60
  -3  -4   0   30.70    9.20
   3  -4   0   36.90   19.70
  -3  -4   0   10.40   17.50
  -3  -4   0   41.60   12.60
   3  -4   0   33.70   11.00
   3  -4   0   30.90   11.40
  -3  -4   0   20.70   14.20
   3  -4   0   27.70   14.20
  -3   4   0   11.00   16.90
   3   4   0   -0.40   14.00
   3   4   0   44.80   11.90
  -3   4   0   13.20   16.40
   3   4   0   29.60   20.50
  -3   4   0   33.30   10.80
   3   4   0   43.40   10.10
  -3   4   0   36.50   11.50
   3   4   0    9.80   16.80
  -3   4   0   22.90   10.70
   3   4   0   21.20   12.80
  -3   4   0   16.90    9.30
   3   4   0   28.20   17.00
   3   4   0   41.80   14.20
  -3   4   0   28.80   11.10
   3   4   0    7.10   20.50
  -3   4   0   11.10   14.20
  -3   4   0   43.40   20.80
  -3   4   0   40.10   11.50
  -4  -4   0   82.09   21.70
  -4  -4   0  100.49   17.90
  -4  -4   0  122.59   18.80
  -4  -4   0   77.69   27.80
   4  -4   0   77.89   17.10
  -4  -4   0   83.09   17.50
   4  -4   0  102.69   15.90
   4  -4   0  131.39   20.00
  -4  -4   0  161.28   31.10
  -4  -4   0   84.69   19.50
  -4  -4   0  108.69   25.50
  -4  -4   0  102.09   22.60
   4  -4   0  165.48   26.30
   4  -4   0   82.89   18.10
  -4  -4   0  118.49   27.80
   4  -4   0  159.08   28.00
   4  -4   0  129.19   26.40
   4  -4   0   84.39   18.20
   4  -4   0  125.39   17.70
  -4   4   0  111.09   19.10
   4   4   0  113.79   24.00
  -4   4   0   94.49   17.90
   4   4   0  102.29   26.90
   4   4   0   99.79   26.90
   4   4   0  158.48   20.50
   4   4   0  149.19   31.00
  -4   4   0  127.49   19.50
  -4   4   0  119.79   25.00
  -4   4   0  141.09   27.80
   4   4   0  139.79   54.59
  -4   4   0  108.59   20.20
  -4   4   0  102.99   18.20
  -4   4   0   85.79   27.70
   4   4   0  144.59   21.30
   4   4   0   98.09   25.30
  -4   4   0  113.69   16.10
  -4   4   0  138.89   28.90
  -4   4   0  136.09   26.30
   4   4   0  103.49   19.40
   5  -4   0 1029.10   89.89
  -5  -4   0 1043.80   95.29
  -5  -4   0 1088.99   82.39
  -5  -4   0 1046.90   90.49
  -5  -4   0  895.41   88.49
   5  -4   0  914.81   88.59
  -5  -4   0 1014.00   96.09
  -5  -4   0 1105.09   84.69
   5  -4   0  895.51   88.29
   5  -4   0 1016.50   85.09
  -5  -4   0 1035.10   94.59
   5  -4   0  984.00   88.99
   5  -4   0 1059.09   84.59
   5  -4   0  904.11   91.49
  -5  -4   0 1099.69   88.79
   5  -4   0  868.91   90.39
  -5  -4   0 1031.40   87.19
  -5  -4   0 1053.49   88.89
  -5  -4   0 1028.70   91.49
  -5   4   0 1102.49   84.39
   5   4   0  976.70   94.39
   5   4   0  979.30   87.29
   5   4   0 1117.99   95.59
  -5   4   0 1030.10   90.19
  -5   4   0  972.00   92.39
  -5   4   0 1102.09   88.99
   5   4   0  971.50   90.69
   5   4   0 1040.00   87.09
  -5   4   0 1085.89   89.29
   5   4   0  977.60   84.19
  -5   4   0 1044.40   89.29
  -5   4   0  960.80   87.69
  -5   4   0  956.30   90.89
   5   4   0 1087.09   89.39
  -5   4   0  907.11   92.39
   5   4   0 1025.10   94.09
  -5   4   0  968.00   90.59
  -5   4   0 1071.69   87.79
   5   4   0 1032.40   91.69
   6  -4   0   55.69   19.30
  -6  -4   0   52.39   23.90
  -6  -4   0   28.50   19.80
   6  -4   0   47.10   16.20
   6  -4   0   50.39    7.60
  -6  -4   0   34.80   18.30
  -6  -4   0   23.40   14.30
  -6  -4   0   23.40    8.40
  -6  -4   0   15.80    7.10
  -6  -4   0   48.50   16.20
  -6  -4   0   27.00   14.90
   6  -4   0   32.50   14.30
  -6  -4   0   21.30   23.00
   6  -4   0   33.20   15.10
  -6  -4   0   30.70   12.90
  -6  -4   0   50.39   14.00
   6  -4   0   53.59   20.70
  -6  -4   0   41.40   13.70
   6  -4   0   50.59   18.20
   6   4   0   28.20   15.00
  -6   4   0   50.49   14.50
  -6   4   0   30.80   14.20
   6   4   0   37.90   21.40
  -6   4   0   55.59   22.50
  -6   4   0   52.19   16.10
  -6   4   0   35.70   17.70
  -6   4   0   38.00   14.00
   6   4   0   31.30   17.70
  -6   4   0   49.80   20.30
  -6   4   0   44.80    7.70
  -6   4   0   23.40   15.40
   6   4   0   56.19   15.40
  -6   4   0   49.60   35.90
  -6   4   0   33.90   16.00
   6   4   0   33.60   12.00
   6   4   0   43.20   13.80
  -6   4   0   24.10   12.40
   6   4   0   84.79   54.29
   6   4   0   23.90   19.20
  -6   4   0   51.29   20.10
   6   4   0   25.80   18.40
   6   4   0   55.89   22.60
  -7  -4   0   31.10   12.70
  -7  -4   0   51.79   19.10
  -7  -4   0   16.10   16.00
   7  -4   0   27.10    8.70
  -7  -4   0   39.00   16.20
  -7  -4   0   22.20   14.50
  -7  -4   0   14.90   11.60
   7  -4   0   29.90   14.40
  -7  -4   0    7.30   19.30
   7  -4   0   21.00   15.50
  -7  -4   0   25.20   18.80
   7  -4   0   49.80   16.70
  -7  -4   0   32.00    8.00
   7  -4   0   -5.50   12.40
   7  -4   0   67.39   19.00
  -7  -4   0   26.50   18.70
   7  -4   0   21.90   17.30
  -7  -4   0   44.40   15.20
  -7   4   0   15.80   15.10
  -7   4   0   33.70   16.10
   7   4   0   27.30   12.50
   7   4   0    9.40   53.99
  -7   4   0    6.90   10.20
  -7   4   0   21.60   16.50
   7   4   0   24.80   15.80
   7   4   0   23.00   13.70
  -7   4   0   44.10   18.10
   7   4   0   -1.50   17.90
  -7   4   0   39.60   14.70
   7   4   0   38.80   15.60
   7   4   0   21.10   16.10
  -7   4   0   45.30   20.60
  -7   4   0   33.60    6.00
  -7   4   0   25.40   12.20
   7   4   0   20.80   18.20
  -7   4   0   44.80   15.80
  -7   4   0   41.20   12.70
  -7   4   0   42.40   15.10
   7   4   0   19.80   20.80
   8  -4   0   63.29   17.70
  -8  -4   0   57.49   20.90
  -8  -4   0   56.49   22.80
   8  -4   0   29.10   18.30
   8  -4   0   67.49   20.60
  -8  -4   0   63.69   25.50
  -8  -4   0   40.70   21.90
  -8  -4   0   54.99   11.20
   8  -4   0   50.69   19.40
  -8  -4   0   55.99   16.90
   8  -4   0   19.00   17.10
  -8  -4   0   68.19   20.20
  -8  -4   0   51.39   19.10
   8  -4   0   47.00   17.60
  -8   4   0   65.49   21.20
   8   4   0   20.60   20.70
  -8   4   0   30.20   17.40
  -8   4   0   66.29   26.00
   8   4   0   65.49   63.89
  -8   4   0   71.89   23.80
  -8   4   0   85.99   23.00
   8   4   0   28.60   15.20
  -8   4   0   64.49   21.70
   8   4   0   65.09   15.30
   8   4   0   -8.90   23.80
  -8   4   0   54.09   16.50
  -8   4   0   95.99   19.90
   8   4   0   77.09   24.70
   8   4   0   29.60   15.80
  -8   4   0   77.29   21.70
   8   4   0   11.00   13.50
   9  -4   0  159.58   30.80
  -9  -4   0  146.59   33.10
  -9  -4   0  151.18   28.20
   9  -4   0  118.59   19.30
  -9  -4   0  119.89   24.60
  -9  -4   0  104.19   25.00
   9  -4   0   85.69   24.60
   9  -4   0  111.89   26.60
   9  -4   0  101.89   26.30
  -9  -4   0   82.19   23.00
  -9  -4   0  126.49   17.80
   9  -4   0  130.29   27.50
  -9  -4   0  137.09   36.60
   9  -4   0  118.09   25.50
  -9  -4   0   91.79   24.80
  -9   4   0  103.39   42.20
  -9   4   0  112.19   24.80
   9   4   0   99.09   27.10
   9   4   0   78.29   27.70
   9   4   0   88.29   75.19
  -9   4   0  113.29   23.60
  -9   4   0  141.39   31.70
   9   4   0  134.69   36.20
   9   4   0  114.79   16.80
  -9   4   0  109.79   28.20
  -9   4   0   90.09   27.60
  -9   4   0  142.59   30.00
  10  -4   0  207.48   28.20
 -10  -4   0  210.48   36.10
  10  -4   0  287.87   44.80
 -10  -4   0  275.37   58.09
 -10  -4   0  257.27   44.00
  10  -4   0  173.08   35.30
 -10  -4   0  258.67   40.40
 -10  -4   0  244.78   25.90
  10  -4   0  286.37   41.60
 -10  -4   0  318.27   53.89
 -10  -4   0  194.28   37.50
 -10  -4   0  213.98   43.20
  10  -4   0  289.27   41.20
 -10   4   0  221.68   40.40
  10   4   0  293.77   47.50
 -10   4   0  243.08   40.60
  10   4   0  170.88   44.10
  10   4   0  238.08   39.20
 -10   4   0  215.18   34.70
 -10   4   0  262.97   45.40
 -10   4   0  235.28   40.80
 -10   4   0  255.47   43.10
 -10   4   0  256.37   36.80
 -11  -4   0  290.97   32.10
  11  -4   0  292.97   88.79
  11  -4   0  140.89   44.70
  11  -4   0  337.57   50.49
  11  -4   0  230.78   42.60
  11  -4   0  321.27   33.90
 -11  -4   0  267.77   52.89
 -11  -4   0  333.77   40.90
 -11  -4   0  334.17   47.40
 -11  -4   0  346.27   53.89
 -11  -4   0  350.56   46.10
 -11   4   0  251.47   50.29
  11   4   0  483.85  120.59
 -11   4   0  309.57   48.70
 -11   4   0  334.57   50.09
  11   4   0  249.08   46.00
 -11   4   0  376.46   45.30
 -11   4   0  286.87   37.00
 -11   4   0  235.78   37.80
  11   4   0  251.77   53.99
 -11   4   0  266.87   46.90
  12  -4   0   64.79   25.30
 -12  -4   0   22.60   22.70
  12  -4   0   15.00   23.60
 -12  -4   0   38.70   15.40
 -12  -4   0   64.09   23.00
 -12  -4   0   65.19   28.70
 -12  -4   0   52.99   21.40
 -12  -4   0   58.09   22.60
  12  -4   0   52.89   17.40
 -12  -4   0   62.59   28.70
  12   4   0   19.60   27.90
  12   4   0   18.00   93.39
  12   4   0   39.80   24.90
 -12   4   0   43.20   24.70
 -12   4   0   22.20   24.20
 -12   4   0   54.89   27.80
 -12   4   0  108.19   26.90
  12   4   0   18.40   24.60
 -12   4   0   52.39   18.80
  13  -4   0   33.10   18.60
 -13  -4   0   28.10   29.80
 -13  -4   0   25.30   22.30
 -13  -4   0   65.99   30.60
  13  -4   0   20.80   20.80
 -13  -4   0   30.80   24.30
  13  -4   0   15.70   16.90
 -13  -4   0   -6.00   21.00
 -13  -4   0   44.10   15.30
  13  -4   0   26.90   22.70
 -13  -4   0   -3.50   20.90
 -13   4   0   26.50   26.20
  13   4   0   51.09   27.50
 -13   4   0   13.10   22.90
 -13   4   0  -12.70   23.70
 -13   4   0   53.59   23.90
  13   4   0   28.70   33.60
 -13   4   0   31.90   19.10
  13   4   0    5.90   22.40
  14  -4   0    3.70   16.00
 -14  -4   0   96.69   35.90
 -14  -4   0  -18.70   37.40
 -14  -4   0   75.89   36.00
 -14  -4   0   67.89   29.10
 -14  -4   0   56.89   30.30
 -14  -4   0   88.99   34.90
 -14  -4   0   54.09   18.30
  14  -4   0   92.09   31.40
  14  -4   0   81.59   32.90
 -14   4   0   63.79   28.10
 -14   4   0   57.99   29.70
 -14   4   0   33.40   24.30
  14   4   0   18.00   35.10
 -14   4   0   41.10   21.60
  14   4   0   99.29   33.30
  14   4   0  -11.10   21.90
 -14   4   0   28.50   26.30
 -14   4   0   13.90   23.60
 -15  -4   0   44.30   23.60
 -15  -4   0   16.30   27.20
  15  -4   0   42.00   27.40
 -15  -4   0   10.20   26.80
  15  -4   0  -10.30   21.20
  15  -4   0  -25.10   18.30
 -15  -4   0   22.90   25.00
 -15  -4   0   47.40   31.30
 -15   4   0   41.30   26.20
 -15   4   0   18.30   17.60
  15   4   0  -75.79   34.00
 -15   4   0   74.49   33.60
 -15   4   0   57.49   27.30
 -15   4   0   10.40   23.30
  15   4   0  -27.90   23.30
 -16  -4   0  -15.00   23.10
  16  -4   0  103.59   37.30
  16  -4   0  -17.90   22.60
 -16  -4   0   21.30   39.60
 -16  -4   0  -19.20   24.20
 -16  -4   0    6.40   26.70
  16   4   0   48.00   49.10
 -16   4   0    9.20   27.60
  16   4   0   40.50   31.90
   0  -5   0    1.40   11.40
   0  -5   0   -9.50   15.10
   0  -5   0   -1.80    8.60
   0  -5   0   -1.30    8.20
   0  -5   0  -22.10   16.70
   0  -5   0    2.30   18.70
   0  -5   0    0.30   11.30
   0  -5   0    8.70   11.30
   0  -5   0    1.50    7.00
   0  -5   0    2.00   12.90
   0   5   0   -5.60    9.30
   0   5   0    7.40   17.40
   0   5   0  -21.60   15.20
   0   5   0  -14.70   12.00
   0   5   0   -1.20    5.30
   0   5   0   -4.50    6.40
   0   5   0    4.20    8.90
   0   5   0  -11.30   14.30
   0   5   0   -3.80    8.70
   0   5   0  -15.50   18.50
   0   5   0   -8.20   11.30
  -1  -5   0 1143.79   94.69
   1  -5   0 1132.09   98.99
   1  -5   0 1145.99   95.69
  -1  -5   0 1024.90   91.29
  -1  -5   0 1067.29   96.29
   1  -5   0 1106.79   94.69
  -1  -5   0 1043.50   91.99
   1  -5   0 1019.70   98.69
   1  -5   0 1092.59   90.99
   1  -5   0 1172.18   93.19
  -1  -5   0 1099.69   91.99
   1  -5   0  999.40   91.39
  -1  -5   0 1002.60   99.49
  -1  -5   0 1120.29   93.49
  -1  -5   0 1048.00   90.09
   1  -5   0  997.90   91.19
   1  -5   0 1107.09   91.39
   1  -5   0 1049.99   90.29
  -1  -5   0 1190.58   99.99
  -1  -5   0 1167.88   94.39
  -1   5   0  965.10   92.09
   1   5   0 1110.39   91.49
   1   5   0 1134.39   92.09
   1   5   0 1065.99   94.29
  -1   5   0 1136.99   91.49
   1   5   0 1210.08   99.59
   1   5   0 1040.60   99.09
   1   5   0  951.00   95.89
  -1   5   0  961.60   91.09
  -1   5   0  986.50  101.99
   1   5   0 1203.48   88.49
   1   5   0 1195.98   90.59
   1   5   0  982.10   92.69
   1   5   0 1161.48   91.59
  -1   5   0 1097.59   90.49
  -1   5   0  978.90   96.59
  -1   5   0 1173.38   90.79
  -1   5   0  988.30   97.79
  -1   5   0 1113.79   91.79
   1   5   0 1024.30   93.79
  -1   5   0  897.71   92.89
  -2  -5   0 1242.78  101.99
   2  -5   0  991.40   99.29
   2  -5   0 1216.38  103.29
   2  -5   0 1249.47  104.09
  -2  -5   0 1207.48  101.89
  -2  -5   0 1255.57  105.99
  -2  -5   0 1138.39  100.39
  -2  -5   0 1078.39  108.19
  -2  -5   0 1280.27  108.79
   2  -5   0 1210.78   98.59
   2  -5   0 1203.08   99.39
   2  -5   0 1226.68  107.59
  -2  -5   0 1344.07  105.89
   2  -5   0 1095.79  100.19
  -2  -5   0 1231.18  103.49
   2  -5   0 1230.58  101.09
  -2  -5   0 1196.58  101.39
  -2  -5   0 1180.58   99.29
   2  -5   0 1245.98  106.79
   2  -5   0 1074.99  100.29
   2   5   0 1093.49  107.59
  -2   5   0 1189.18  101.09
   2   5   0 1261.47   95.99
  -2   5   0 1231.08  100.49
  -2   5   0 1054.99  107.09
  -2   5   0 1055.99  104.19
  -2   5   0 1280.17  100.39
  -2   5   0 1133.19  107.09
   2   5   0 1109.59  105.39
   2   5   0 1133.69  104.59
  -2   5   0 1161.78   98.99
  -2   5   0 1190.68   99.29
   2   5   0 1290.47  101.49
  -2   5   0 1115.59  102.89
   2   5   0 1300.87  100.99
   2   5   0 1232.08  101.59
   2   5   0 1311.37   99.39
   2   5   0 1116.29  103.19
   2   5   0 1088.69  100.99
   2   5   0 1147.59  106.79
  -2   5   0 1235.38  100.69
  -2   5   0 1264.47  100.69
  -3  -5   0   85.49   20.00
  -3  -5   0   94.09   29.50
   3  -5   0  110.59   13.90
  -3  -5   0  115.59   27.20
   3  -5   0  137.19   18.80
   3  -5   0   64.99   16.70
  -3  -5   0  139.49   31.10
   3  -5   0  118.89   25.50
  -3  -5   0   66.49   24.70
   3  -5   0   84.69   18.50
  -3  -5   0  100.79   23.10
  -3  -5   0  118.39   21.00
   3  -5   0   82.59   17.80
  -3  -5   0   89.69   18.30
   3  -5   0  144.19   29.10
   3  -5   0  185.78   33.10
   3  -5   0   86.69   21.80
  -3  -5   0  126.69   19.90
  -3  -5   0  109.09   21.40
  -3   5   0  126.79   18.10
   3   5   0   51.49   27.40
   3   5   0  103.49   16.80
  -3   5   0   89.99   17.70
  -3   5   0   82.89   25.50
   3   5   0   85.99   47.80
  -3   5   0   90.89   18.00
   3   5   0  101.79   20.90
  -3   5   0   98.69   18.80
   3   5   0   60.89   23.90
  -3   5   0  130.39   20.40
   3   5   0  102.19   24.40
   3   5   0   85.29   19.40
  -3   5   0  121.59   18.20
  -3   5   0   94.09   17.90
  -3   5   0   97.99   25.00
  -3   5   0   88.89   28.30
  -3   5   0   88.79   14.20
   3   5   0   63.09   27.00
  -3   5   0  109.89   31.70
   3   5   0   87.79   27.20
   3   5   0  104.79   19.30
  -4  -5   0  446.76   42.00
  -4  -5   0  437.16   48.30
  -4  -5   0  474.35   47.00
  -4  -5   0  410.56   43.50
  -4  -5   0  432.56   46.40
  -4  -5   0  366.26   50.69
   4  -5   0  448.06   44.30
   4  -5   0  482.05   46.50
  -4  -5   0  438.56   44.00
  -4  -5   0  451.35   51.29
   4  -5   0  421.06   42.10
   4  -5   0  507.35   42.10
  -4  -5   0  448.86   49.99
   4  -5   0  445.06   42.50
   4  -5   0  473.35   44.80
   4  -5   0  427.56   48.90
  -4  -5   0  366.46   43.90
   4  -5   0  446.26   50.69
   4  -5   0  429.16   43.70
   4   5   0  411.46   47.20
   4   5   0  421.76   43.50
   4   5   0  336.07   48.50
  -4   5   0  409.86   50.89
   4   5   0  387.16   50.69
   4   5   0  437.46   49.30
  -4   5   0  468.65   42.80
   4   5   0  443.06   42.70
  -4   5   0  522.55   44.70
  -4   5   0  503.95   42.10
   4   5   0  444.36   43.80
  -4   5   0  435.46   48.90
  -4   5   0  474.05   50.39
  -4   5   0  511.75   44.20
  -4   5   0  420.26   46.90
   4   5   0  466.85   50.29
   4   5   0  443.06   41.70
  -4   5   0  503.05   44.50
  -4   5   0  501.75   44.70
  -5  -5   0  115.49   21.70
  -5  -5   0   90.59   23.10
   5  -5   0   85.49   23.60
  -5  -5   0   66.79   18.30
   5  -5   0  101.19   16.80
  -5  -5   0  105.29   17.20
   5  -5   0  104.89   15.30
   5  -5   0   65.39   17.60
  -5  -5   0   36.70   24.60
  -5  -5   0   74.79   19.60
  -5  -5   0   68.59   21.40
   5  -5   0   71.19   17.90
  -5  -5   0  113.99   27.40
   5  -5   0   57.69   17.20
   5  -5   0   52.29   23.70
   5  -5   0   84.59   17.10
  -5  -5   0   89.09   16.40
   5  -5   0   85.19   24.30
  -5  -5   0   98.99   29.50
   5   5   0   98.29   26.60
   5   5   0   82.99   18.20
   5   5   0   95.19   18.80
  -5   5   0   81.29   18.40
  -5   5   0   93.59   19.00
   5   5   0   76.39   21.20
  -5   5   0   96.49   15.40
  -5   5   0   74.49   23.70
  -5   5   0   95.09   19.50
  -5   5   0   97.39   19.60
   5   5   0   76.29   27.00
   5   5   0   70.49   23.60
   5   5   0   53.39   24.60
  -5   5   0   64.59   24.20
  -5   5   0  121.99   19.70
   5   5   0   68.89   15.40
  -5   5   0   60.09   23.90
  -5   5   0   72.19   16.60
   5   5   0   78.39   16.50
  -5   5   0   83.59   24.60
   6  -5   0  355.56   42.20
   6  -5   0  304.37   39.20
  -6  -5   0  340.07   33.90
  -6  -5   0  443.56   54.49
  -6  -5   0  401.56   49.30
  -6  -5   0  371.16   37.50
   6  -5   0  396.36   41.20
  -6  -5   0  356.96   41.20
  -6  -5   0  437.96   45.60
   6  -5   0  370.86   33.30
  -6  -5   0  368.56   39.60
  -6  -5   0  365.86   47.70
   6  -5   0  364.66   33.80
  -6  -5   0  357.46   30.20
   6  -5   0  336.37   40.10
  -6  -5   0  406.96   45.20
   6  -5   0  382.36   41.10
  -6  -5   0  346.37   40.20
   6  -5   0  351.76   44.10
  -6   5   0  314.87   42.30
   6   5   0  345.87   38.70
  -6   5   0  337.97   38.10
  -6   5   0  351.66   39.00
  -6   5   0  329.27   37.10
  -6   5   0  317.27   56.89
  -6   5   0  392.76   39.50
  -6   5   0  419.06   43.50
   6   5   0  361.96   47.10
  -6   5   0  395.76   46.80
   6   5   0  371.66   43.60
   6   5   0  358.76   36.50
   6   5   0  324.07   41.40
  -6   5   0  389.56   40.00
  -6   5   0  340.97   40.80
   6   5   0  392.86   47.40
  -6   5   0  357.36   42.90
   6   5   0  385.96   37.90
   6   5   0  359.76   85.69
   7  -5   0   -3.60   14.60
  -7  -5   0   32.50   23.50
  -7  -5   0   22.20   18.30
   7  -5   0   17.70   17.00
  -7  -5   0    9.00    7.10
   7  -5   0   36.40   18.60
   7  -5   0  -15.10   34.50
  -7  -5   0   18.40   11.10
  -7  -5   0   -0.70   19.20
  -7  -5   0    8.10    4.60
  -7  -5   0   -3.30    9.70
  -7  -5   0   25.40   15.50
  -7  -5   0   -6.60   11.00
  -7  -5   0   14.50   19.90
   7  -5   0   47.40   19.20
   7  -5   0   27.50   17.90
  -7  -5   0    7.00   13.20
  -7   5   0   38.10   22.70
  -7   5   0   10.00   15.40
   7   5   0   25.00   22.70
   7   5   0   -4.50   16.60
   7   5   0    7.10   11.50
   7   5   0   21.10   11.30
   7   5   0   23.40   13.20
  -7   5   0   27.90   14.40
   7   5   0   23.60   22.80
   7   5   0   14.70   95.19
  -7   5   0   12.80   10.60
  -7   5   0   15.60   18.40
  -7   5   0   21.90    7.10
  -7   5   0    9.90   12.10
  -7   5   0   24.70   16.30
   7   5   0   17.20   14.60
   7   5   0   -3.10   15.10
  -7   5   0   10.40   17.80
  -7   5   0   20.30   10.00
  -7   5   0   24.80   14.40
   7   5   0   19.80   17.20
  -8  -5   0    8.40   15.90
   8  -5   0   -9.30   13.40
  -8  -5   0   14.40    6.30
  -8  -5   0   14.30   15.70
  -8  -5   0    9.70   16.20
   8  -5   0   16.50   16.60
  -8  -5   0   20.70   21.50
   8  -5   0  -10.60   14.20
   8  -5   0   10.00   15.10
   8  -5   0  -27.30   39.10
   8  -5   0  -12.50   14.20
  -8  -5   0   17.50   14.60
   8  -5   0   19.80   15.40
  -8  -5   0  -22.80   15.40
  -8  -5   0   31.40   24.10
   8   5   0   36.10   18.80
  -8   5   0   22.90   17.20
   8   5   0   12.30   12.60
  -8   5   0   20.60   15.10
   8   5   0   30.60   63.89
  -8   5   0   22.70   20.10
   8   5   0   26.10   13.40
  -8   5   0   19.70   13.90
   8   5   0   18.20   22.30
   8   5   0   36.20   21.00
  -8   5   0    4.10   14.40
  -8   5   0    4.70   20.70
  -8   5   0   -8.70   13.70
   8   5   0   19.20   15.90
  -8   5   0    9.30   21.60
   9  -5   0   42.40   19.90
   9  -5   0   21.70   19.20
   9  -5   0   40.00   19.30
  -9  -5   0    7.40   15.60
   9  -5   0   84.99   24.00
  -9  -5   0   31.70   28.90
   9  -5   0   28.90   19.40
  -9  -5   0   35.40   20.30
  -9  -5   0   71.59   24.90
  -9  -5   0   17.10   18.90
   9  -5   0   35.00   19.70
  -9  -5   0   13.30   16.40
  -9  -5   0   31.00    8.70
   9  -5   0    0.20   48.50
  -9  -5   0   54.89   26.30
  -9   5   0   57.19   24.30
   9   5   0   20.10   25.30
  -9   5   0   85.49   30.10
  -9   5   0   58.39   19.20
  -9   5   0   42.70   21.90
  -9   5   0   26.80   16.00
   9   5   0   58.89   26.10
  -9   5   0   10.10   19.30
  -9   5   0   43.80   19.70
   9   5   0   30.90   17.30
   9   5   0   26.20   20.70
  -9   5   0   41.70   23.20
  10  -5   0   30.50   21.20
  10  -5   0    7.90   18.00
  10  -5   0  -11.20   18.90
 -10  -5   0   -3.30    7.60
 -10  -5   0   43.00   22.10
 -10  -5   0  -20.90   22.80
 -10  -5   0    6.90   18.60
 -10  -5   0   22.30   20.80
  10  -5   0   20.40    7.50
  10  -5   0   28.50   17.10
 -10  -5   0    5.30   16.30
  10   5   0   35.50   26.50
 -10   5   0   39.00   24.70
  10   5   0   -1.10   13.00
 -10   5   0   26.10   22.60
 -10   5   0  -14.70   19.50
 -10   5   0   24.10   17.60
  10   5   0   -8.30   17.30
 -10   5   0    7.90   16.10
 -10   5   0   31.10   23.40
 -10   5   0    9.10   23.70
  10   5   0   18.10   19.80
  10   5   0   31.50   75.79
  10   5   0   31.10    9.80
 -11  -5   0   78.99   32.30
 -11   5   0   53.29   27.10
  11   5   0  173.08   88.69
 -12  -5   0   18.60   11.40
 -12  -5   0   56.19   33.50
 -12  -5   0   30.90   31.60
 -12  -5   0   21.00   22.30
 -12  -5   0    1.30   15.90
  12  -5   0   16.10   23.00
  12  -5   0   13.70   19.70
  12  -5   0  -15.80   15.90
 -12  -5   0   47.80   25.40
 -12  -5   0   15.00   18.80
  12   5   0   38.10   26.20
 -12   5   0   42.90   25.80
 -12   5   0   12.30   17.30
  12   5   0   -7.80  107.39
 -12   5   0   29.90   23.80
 -12   5   0    5.10   25.10
  12   5   0   45.40   35.80
  12   5   0   30.40   23.80
 -12   5   0  -12.00   21.50
  13   5   0   29.30   39.90
 -14  -5   0  -16.30   19.60
 -14  -5   0   15.20   27.70
  14  -5   0   25.80   25.10
 -14  -5   0   22.70   22.50
 -14  -5   0   16.90   36.80
  14  -5   0   32.70   26.00
 -14  -5   0   44.10   32.80
 -14   5   0   39.80   25.10
  14   5   0   12.50   24.40
  14   5   0   13.20   31.40
 -14   5   0   20.00   26.10
 -14   5   0    6.00   23.00
  14   5   0   15.10   28.00
 -14   5   0   38.40   22.00
 -14   5   0   20.50   26.30
 -14   5   0   17.60   23.00
 -15  -5   0  -16.60   24.10
 -15  -5   0   18.30   23.30
  15  -5   0    5.40   24.20
  15  -5   0   -8.00   22.60
 -15  -5   0   -2.10   32.20
 -15  -5   0   28.70   22.80
 -15  -5   0    1.70   28.40
  15   5   0   89.19  158.88
 -15   5   0    6.20   23.60
  15   5   0   70.19   33.00
 -15   5   0   12.90   23.90
  15   5   0   54.19   46.70
 -15   5   0   12.70   24.20
 -15   5   0   21.10   21.70
 -15   5   0  -31.40   25.40
   0  -6   0  518.85   49.70
   0  -6   0  526.95   53.09
   0  -6   0  480.25   45.10
   0  -6   0  476.25   45.60
   0  -6   0  447.06   47.40
   0  -6   0  519.15   56.99
   0  -6   0  494.15   47.10
   0  -6   0  511.35   50.39
   0  -6   0  451.85   49.90
   0  -6   0  417.96   56.39
   0   6   0  375.06   52.49
   0   6   0  451.35   51.19
   0   6   0  471.85   49.80
   0   6   0  461.35   57.49
   0   6   0  593.84   45.80
   0   6   0  509.95   56.49
   0   6   0  519.05   47.40
   0   6   0  507.05   46.30
   0   6   0  473.85   45.80
   0   6   0  415.56   49.60
   0   6   0  474.05   43.80
   1   6   0 2017.60  178.08
   2  -6   0  724.43   62.69
   2  -6   0  672.43   66.19
   2  -6   0  689.63   61.49
  -2  -6   0  717.73   60.69
  -2  -6   0  646.44   63.79
   2  -6   0  632.44   61.29
  -2  -6   0  631.04   62.89
   2  -6   0  688.33   65.79
   2  -6   0  742.13   63.29
  -2  -6   0  661.23   62.39
   2  -6   0  704.53   60.79
  -2  -6   0  672.33   65.39
  -2  -6   0  672.33   71.49
  -2  -6   0  612.44   72.29
   2  -6   0  694.23   69.99
  -2  -6   0  755.02   67.79
   2  -6   0  724.13   62.39
  -2  -6   0  757.12   69.19
   2  -6   0  670.33   60.59
  -2  -6   0  677.93   63.89
   2  -6   0  632.14   69.99
   2   6   0  589.84   68.19
   2   6   0  778.82   63.39
  -2   6   0  757.42   61.69
   2   6   0  719.53   60.39
  -2   6   0  662.93   61.59
  -2   6   0  649.24   71.19
  -2   6   0  758.02   62.49
   2   6   0  647.04   63.49
  -2   6   0  633.84   66.39
   2   6   0  599.84   65.29
  -2   6   0  697.53   70.19
   2   6   0  667.43   69.99
  -2   6   0  811.22   62.49
  -2   6   0  693.43   62.19
   2   6   0  697.33   56.89
  -2   6   0  587.64   62.69
   2   6   0  607.14   71.39
   2   6   0  694.13   62.89
  -2   6   0  602.14   69.69
  -2   6   0  675.23   60.29
   2   6   0  537.65   65.29
   2   6   0  741.23   81.49
   2   6   0  757.42   62.19
   3  -6   0   74.89   15.70
   3  -6   0   55.69   15.20
   3  -6   0   82.39   18.10
   3  -6   0  100.59   14.10
   3  -6   0   67.59   25.50
   3  -6   0  108.59   23.30
  -3  -6   0   58.39   18.30
  -3  -6   0   66.39   18.20
   3  -6   0   80.99   16.70
  -3  -6   0   83.99   25.20
   3  -6   0   90.89   17.90
  -3  -6   0   80.19   16.50
  -3  -6   0   93.89   27.10
   3  -6   0   53.49   27.60
  -3  -6   0   74.69   25.20
  -3  -6   0   77.79   20.70
   3  -6   0  126.69   24.40
  -3  -6   0   89.99   22.50
  -3  -6   0   74.89   30.10
  -3  -6   0   52.89   16.60
   3   6   0   81.69   16.40
  -3   6   0   89.99   15.30
   3   6   0   75.39   26.40
  -3   6   0   83.49   17.10
   3   6   0  105.99   16.70
  -3   6   0   96.89   18.30
   3   6   0   47.80   20.00
  -3   6   0   70.29   28.60
  -3   6   0   58.29   22.80
   3   6   0   62.69   25.90
   3   6   0   84.39   29.80
   3   6   0   36.70   21.80
  -3   6   0   68.39   16.80
  -3   6   0   62.49   16.10
  -3   6   0   58.19   27.00
  -3   6   0   80.99   16.10
  -3   6   0   76.69   15.90
   3   6   0   53.09    6.70
   3   6   0   82.89   18.50
   3   6   0   99.39   20.00
  -3   6   0   95.49   25.30
   4  -6   0  102.59   28.50
  -4  -6   0  130.59   28.70
   4  -6   0   72.49   17.70
  -4  -6   0  110.99   28.00
  -4  -6   0   52.99   15.20
   4  -6   0  150.98   25.20
   4  -6   0   94.09   17.40
  -4  -6   0  107.59   29.30
  -4  -6   0   90.19   18.60
   4  -6   0   70.39   10.30
   4  -6   0   96.19   19.90
  -4  -6   0   92.59   32.10
  -4  -6   0   70.19   20.40
  -4  -6   0  123.49   21.10
  -4  -6   0   81.69   20.30
   4  -6   0   49.80   26.00
   4  -6   0  121.19   20.30
   4  -6   0  104.19   26.50
  -4  -6   0   94.59   23.40
   4  -6   0  107.99   19.40
  -4   6   0  121.09   20.90
   4   6   0   88.89   25.90
  -4   6   0   89.69   19.30
   4   6   0  111.29   19.80
  -4   6   0   89.99   17.70
   4   6   0   45.60   55.69
   4   6   0   99.09   25.80
  -4   6   0  112.99   28.50
  -4   6   0   68.89   27.50
   4   6   0  107.89   17.70
   4   6   0  132.49   26.30
  -4   6   0   84.79   27.90
  -4   6   0  113.59   20.80
  -4   6   0  118.39   19.80
  -4   6   0   75.59   16.60
  -4   6   0   79.49   18.40
   4   6   0   84.69   27.70
  -4   6   0   90.39   27.90
   4   6   0   87.39   20.70
   4   6   0  104.39   20.90
   4   6   0  104.19   31.40
   5  -6   0   89.39   21.00
  -5  -6   0  119.19   29.10
   5  -6   0   89.79   20.90
   5  -6   0  132.89   31.50
   5  -6   0  133.49   28.80
  -5  -6   0   95.19   19.60
  -5  -6   0  117.49   21.50
  -5  -6   0   55.09   29.20
  -5  -6   0  113.29   25.00
  -5  -6   0  126.69   33.90
   5  -6   0  118.29   19.10
   5  -6   0   86.79   17.20
  -5  -6   0  104.79   24.70
  -5  -6   0  116.99   24.10
  -5  -6   0   81.19   19.90
   5  -6   0  174.38   31.50
   5  -6   0  104.89   19.70
   5  -6   0   69.39   17.50
   5  -6   0  142.19   31.60
   5   6   0   63.59   27.50
   5   6   0  100.09   20.10
  -5   6   0   89.59   17.60
   5   6   0   97.99   28.90
  -5   6   0  149.19   22.60
   5   6   0  105.29   31.40
  -5   6   0  133.29   30.30
  -5   6   0  118.49   22.60
  -5   6   0  109.19   21.10
  -5   6   0   98.19   32.50
  -5   6   0   90.69   28.10
   5   6   0   64.49   59.09
   5   6   0  134.59   19.80
   5   6   0  113.59   21.10
   5   6   0   83.79   24.90
  -5   6   0   75.89   26.80
  -6  -6   0  146.39   24.60
   6  -6   0  150.98   21.40
  -6  -6   0   96.29   23.30
   6  -6   0  161.58   29.10
   6  -6   0  110.19   23.20
   6  -6   0  125.79   20.20
  -6  -6   0  142.59   23.40
  -6  -6   0  204.18   39.90
  -6  -6   0  160.58   33.10
  -6  -6   0  177.08   31.20
  -6  -6   0  129.79   38.00
   6  -6   0  148.59   25.70
  -6  -6   0  169.98   30.40
  -6  -6   0  167.38   33.70
   6  -6   0  130.29   26.10
   6  -6   0  125.99   19.40
  -6  -6   0  157.28   29.00
  -6  -6   0  103.09   35.20
  -6   6   0  110.39   29.40
  -6   6   0  166.28   25.70
  -6   6   0  135.29   31.80
  -6   6   0  164.68   21.30
  -6   6   0  105.09   32.00
   6   6   0  149.39   77.29
   6   6   0  137.49   25.20
   6   6   0  171.98   23.90
  -6   6   0  150.98   26.40
  -6   6   0  105.89   27.30
   6   6   0  119.59   28.80
   6   6   0  174.38   26.40
   6   6   0  167.18   35.60
   6   6   0  136.69   35.40
   6   6   0  132.69   30.50
   6   6   0  161.88   22.80
  -6   6   0  115.79   22.20
  -6   6   0  138.99   24.40
  -6   6   0  106.49   22.30
  -6   6   0  175.98   30.10
  -6   6   0  155.48   24.80
   6   6   0  162.88   36.70
  -7  -6   0   -0.10   17.10
   7  -6   0    7.80   19.30
   7  -6   0    5.00    5.10
  -7  -6   0   16.60   12.60
  -7  -6   0   15.80   13.10
   7  -6   0    7.10   16.30
   7  -6   0    2.60    7.50
   7  -6   0   -0.70   13.80
  -7  -6   0   15.30   17.50
   7  -6   0    7.30   14.60
  -7  -6   0   55.69   19.60
   7  -6   0   14.80   17.70
   7  -6   0   -3.20   10.80
  -7  -6   0   19.80   26.40
  -7  -6   0   12.10   11.40
  -7  -6   0   32.10   16.70
  -7  -6   0   47.60   19.30
  -7  -6   0   29.50   29.40
  -7   6   0    1.10   12.00
   7   6   0   36.10   14.00
   7   6   0    2.80   20.40
   7   6   0   23.50   20.30
   7   6   0   17.90   16.20
  -7   6   0    2.60   14.10
  -7   6   0   16.40   10.30
  -7   6   0   11.20   18.00
   7   6   0   34.90   27.10
  -7   6   0   -3.40   21.10
   7   6   0   45.90   15.20
  -7   6   0   16.80   18.90
  -7   6   0   16.50   12.70
   7   6   0   13.80    9.60
  -7   6   0   -2.70   12.30
   7   6   0   -1.40   19.80
  -7   6   0   28.90   20.50
   7   6   0  169.28   67.89
  -7   6   0   18.50   16.50
   8  -6   0   85.99   24.40
  -8  -6   0  102.69   26.90
  -8  -6   0   86.99   34.50
   8  -6   0  150.58   30.60
   8  -6   0   96.39   24.70
   8  -6   0  115.79   30.10
  -8  -6   0  115.69   14.60
  -8  -6   0   98.19   25.20
   8  -6   0  167.28   35.30
  -8  -6   0  104.09   31.20
  -8  -6   0  152.38   33.60
  -8  -6   0  102.49   25.90
  -8  -6   0  114.79   10.80
   8  -6   0  145.29   29.60
   8   6   0   86.49   30.50
  -8   6   0  101.49   23.30
   8   6   0  157.08   29.70
   8   6   0   80.69   20.60
  -8   6   0  116.79   34.10
   8   6   0  153.98   24.90
  -8   6   0  128.89   30.20
  -8   6   0  108.89   13.40
   8   6   0   81.79   33.10
  -8   6   0   80.39   26.70
  -8   6   0   98.49   23.60
  -8   6   0  152.88   32.80
   8   6   0  141.29   81.99
  -8   6   0  144.79   34.50
   8   6   0  119.09   29.40
  -8   6   0   77.29   25.70
   9  -6   0   11.60   20.30
  -9  -6   0   12.80   18.90
  -9  -6   0  -11.60   17.30
  -9  -6   0   -0.30   18.00
   9  -6   0  -24.70   15.40
   9  -6   0   35.90   18.70
  -9  -6   0    1.20   13.90
   9  -6   0    4.80   18.20
  -9  -6   0   20.40   33.00
   9  -6   0   11.00   18.90
  -9  -6   0   10.70   18.90
  -9  -6   0    3.10   28.40
  -9  -6   0    0.90    4.90
  -9   6   0   18.30   20.30
  -9   6   0   -7.30   12.30
   9   6   0   23.70   22.90
  -9   6   0   31.90   23.20
   9   6   0   76.59   80.39
  -9   6   0  -22.80   19.40
  -9   6   0   -6.20   17.60
  -9   6   0  -23.50   18.90
  -9   6   0  -22.10   15.20
   9   6   0    6.20   24.40
   9   6   0   -2.60   21.80
   9   6   0   21.10   14.50
  -9   6   0   22.20   19.30
   9   6   0   11.20   18.20
 -10  -6   0    0.70   27.30
 -10  -6   0   43.20    8.70
  10  -6   0   57.19   24.70
  10  -6   0    0.20   16.10
  10  -6   0   52.79   22.30
 -10  -6   0   32.20   18.20
 -10  -6   0   -3.20   19.10
 -10  -6   0   38.10   22.40
 -10  -6   0   20.90   23.20
  10  -6   0   43.00   21.70
 -10  -6   0   29.80   21.90
  10  -6   0   17.80   19.50
  10   6   0   36.10   28.60
  10   6   0   -5.70   22.50
 -10   6   0   34.10   18.30
  10   6   0   17.80   20.40
  10   6   0  102.59   21.20
 -10   6   0   10.60   18.40
 -10   6   0   33.00   28.00
 -10   6   0  104.59   33.60
 -10   6   0   49.20   23.60
 -10   6   0   25.00   23.70
  11  -6   0   41.50   23.10
 -11  -6   0   62.19   24.20
  11  -6   0   44.40   26.90
 -11  -6   0   52.49   31.70
 -11  -6   0   38.10   33.30
 -11  -6   0   31.50   26.00
  11   6   0   26.30   31.80
 -11   6   0   41.00   25.10
 -11   6   0   61.59   28.60
 -11   6   0   44.80   26.90
 -12  -6   0   80.59   25.90
  12  -6   0   28.10   24.50
 -12  -6   0  -19.50   28.30
 -12  -6   0   57.59   22.40
 -12  -6   0   72.09   40.60
 -12  -6   0   59.39   12.00
 -12  -6   0   42.00   24.70
 -12  -6   0   45.30   34.60
  12  -6   0   43.40   25.50
  12  -6   0   42.00   24.60
  12  -6   0   51.09   23.70
 -12   6   0   28.70   25.50
  12   6   0   49.80   27.90
  12   6   0   60.09   29.20
  12   6   0    1.40   34.50
 -12   6   0   51.19   20.30
 -12   6   0   20.00   29.70
 -12   6   0   97.79   36.40
 -12   6   0    3.80   22.10
 -13  -6   0    8.50   31.10
  13  -6   0  -13.30   23.90
 -13  -6   0  -45.70   26.20
 -13  -6   0   19.90   22.60
  13  -6   0   21.20   21.40
 -13  -6   0    8.10    8.90
 -13  -6   0    6.10   20.00
  13  -6   0  -15.90   16.90
 -13  -6   0  -13.00   21.10
 -13  -6   0   -2.30   27.80
 -13   6   0    2.50   24.20
 -13   6   0    7.70   18.40
 -13   6   0   -1.60   22.70
  13   6   0   42.10   24.60
  13   6   0  -39.70   35.20
 -13   6   0   19.10   26.30
 -13   6   0    8.90   23.10
  13   6   0   36.40   23.30
  14  -6   0  -16.90   19.20
 -14  -6   0   -1.10   23.40
 -14  -6   0   15.20   24.10
 -14  -6   0   19.10   31.20
 -14  -6   0   24.00   30.80
 -14  -6   0   -3.70   20.40
  14  -6   0   13.30   23.00
  14   6   0   -5.10   29.10
 -14   6   0    2.60   28.70
  14   6   0   19.20   27.30
 -14   6   0   -4.30   20.70
 -14   6   0   -8.90   17.90
  14   6   0   15.50   33.10
 -14   6   0   42.20   29.70
 -14   6   0   42.00   26.80
 -15  -6   0   -2.60   21.10
 -15  -6   0   20.50   31.80
 -15  -6   0   30.20   32.30
  15  -6   0   15.60   20.70
  15  -6   0   -4.80   27.30
 -15  -6   0   -1.90   35.70
 -15  -6   0    3.00   20.40
 -15   6   0   -5.50   29.40
  15   6   0   24.40   36.50
 -15   6   0   80.79   31.50
 -15   6   0  -33.80   26.80
  15   6   0  -29.00   27.30
 -15   6   0   12.30   29.40
   0  -7   0    1.00   16.10
   0  -7   0   -8.50   23.90
   0  -7   0   20.20   18.70
   0  -7   0    1.60   10.60
   0  -7   0    5.70   11.60
   0  -7   0   19.20   11.30
   0  -7   0   20.10   14.80
   0  -7   0   -0.50   13.20
   0  -7   0   16.50   15.50
   0  -7   0    2.60   19.90
   0   7   0  -19.50   19.00
   0   7   0    2.80   16.80
   0   7   0  -14.30   14.90
   0   7   0   20.70   11.90
   0   7   0    8.90   11.50
   0   7   0   46.20   21.50
   0   7   0   15.70   24.90
   0   7   0   14.00   11.00
   0   7   0  -16.20   20.50
   0   7   0   23.30   13.50
   0   7   0   14.60    9.20
  -1  -7   0   94.39   30.80
  -1  -7   0    7.10   14.70
  -1  -7   0   92.69   21.50
  -1  -7   0   42.80   28.50
  -1  -7   0   52.09   16.60
   1  -7   0   83.69   21.50
   1  -7   0   53.99   15.00
   1  -7   0  108.99   21.60
   1  -7   0   61.79   30.60
  -1  -7   0   54.89   20.10
   1  -7   0   46.20   24.00
   1  -7   0   65.29   17.60
  -1  -7   0   39.80   18.60
  -1  -7   0   54.89   16.20
  -1  -7   0  101.09   27.70
  -1  -7   0   48.60   14.70
   1  -7   0   47.10   15.10
   1  -7   0   95.79   20.30
   1  -7   0   75.19   23.30
   1  -7   0  124.19   32.20
   1   7   0   52.59   20.90
  -1   7   0   78.29   17.10
  -1   7   0   16.90   17.40
   1   7   0   82.99   20.40
  -1   7   0   85.39   30.40
   1   7   0   44.80   25.40
   1   7   0   88.59   16.40
   1   7   0   -0.50   38.00
  -1   7   0   60.29   23.40
  -1   7   0   65.69   16.10
  -1   7   0   89.09   20.90
  -1   7   0   52.29   31.00
   1   7   0   85.59   17.40
   1   7   0   66.49   13.60
   1   7   0   79.39   32.00
   1   7   0   85.19   27.90
  -1   7   0   76.19   17.20
  -1   7   0   76.19   15.50
  -1   7   0   50.29   26.80
  -1   7   0   96.89   20.90
   1   7   0   34.20   14.50
   1   7   0   94.49   24.40
   1   7   0   75.19   23.20
   2  -7   0   66.89   18.50
   2  -7   0  103.59   28.50
  -2  -7   0   84.99   31.60
  -2  -7   0   85.59   21.40
  -2  -7   0   60.49   18.60
   2  -7   0  122.79   22.00
   2  -7   0   88.79   24.00
  -2  -7   0   82.19   16.50
   2  -7   0   62.09   17.70
   2  -7   0   91.99   19.70
   2  -7   0   92.09   18.30
  -2  -7   0  116.29   32.50
   2  -7   0   78.69   19.10
   2  -7   0   93.19   17.50
  -2  -7   0   66.19   17.90
   2  -7   0   68.49   28.70
   2  -7   0  160.88   29.30
  -2  -7   0   98.09   26.00
  -2  -7   0   78.79   18.80
  -2  -7   0  115.49   27.90
  -2  -7   0   91.39   22.40
  -2   7   0   93.99   20.20
   2   7   0   69.89   24.70
   2   7   0   46.80   19.90
   2   7   0   46.40   22.70
  -2   7   0   93.29   17.60
  -2   7   0   44.60   24.80
   2   7   0   73.79   17.20
   2   7   0  118.29   45.00
   2   7   0  117.39   21.70
  -2   7   0   84.99   30.80
   2   7   0   48.90   21.30
  -2   7   0   57.49   23.00
  -2   7   0   79.49   17.70
   2   7   0   77.49   11.20
   2   7   0   58.99   15.00
   2   7   0   73.49   28.00
  -2   7   0   96.09   31.40
  -2   7   0   77.79   19.90
   2   7   0   67.29   30.60
  -2   7   0  105.19   18.30
  -2   7   0  120.39   21.40
  -2   7   0   71.59   15.20
   2   7   0   56.39   16.60
   3  -7   0    1.70    8.80
  -3  -7   0   34.20   22.90
   3  -7   0    4.20   17.70
   3  -7   0    3.10   11.80
  -3  -7   0    5.10   13.20
  -3  -7   0    5.70   19.10
   3  -7   0   10.50   12.50
   3  -7   0  -26.30   13.80
  -3  -7   0   -0.90   13.00
   3  -7   0    3.00   13.80
  -3  -7   0   -3.80   21.70
  -3  -7   0  -10.00    7.80
   3  -7   0   11.30   11.40
   3  -7   0   -4.60   11.70
  -3  -7   0   -0.20   11.70
  -3  -7   0   19.10   12.60
  -3  -7   0   -0.10   11.70
  -3  -7   0    8.00   16.60
   3  -7   0   -7.50   20.00
   3  -7   0    2.80   10.10
   3  -7   0   -7.20   11.70
   3   7   0  -15.40   47.60
   3   7   0   20.10   20.00
   3   7   0   -5.70   21.30
  -3   7   0    5.20   12.50
  -3   7   0    6.60   10.70
  -3   7   0   11.70   12.10
  -3   7   0   19.70   18.40
  -3   7   0   -9.90   19.60
   3   7   0   -4.80   19.00
   3   7   0   21.90   17.20
  -3   7   0    6.70   19.40
  -3   7   0    8.00    9.30
  -3   7   0   13.70    9.00
   3   7   0  -11.10   18.70
   3   7   0    4.20   10.70
  -3   7   0    4.50   10.90
   3   7   0    5.20    3.90
  -3   7   0    7.60    9.90
   3   7   0   16.50   11.20
   3   7   0   16.90   14.80
   3   7   0    9.20    9.40
  -3   7   0  -11.70   23.70
   4  -7   0   62.39   16.10
   4  -7   0   61.39   24.50
  -4  -7   0   63.59   14.80
  -4  -7   0   28.40   28.60
   4  -7   0  107.89   24.00
  -4  -7   0   32.90   24.10
   4  -7   0   49.99   15.20
   4  -7   0   59.39   19.30
   4  -7   0   28.90   16.60
  -4  -7   0   62.29   19.40
  -4  -7   0   38.10   19.00
  -4  -7   0   54.59   26.20
  -4  -7   0   43.30   17.60
   4  -7   0   39.00   24.00
  -4  -7   0   56.09   17.10
  -4  -7   0   93.49   21.40
   4  -7   0   36.40   14.60
   4  -7   0   44.60   16.20
   4  -7   0   59.39   11.10
   4   7   0   36.10   20.80
  -4   7   0   96.69   19.80
  -4   7   0   66.79   17.30
  -4   7   0   53.29   16.30
  -4   7   0   53.99   24.30
  -4   7   0   53.59   14.50
  -4   7   0   29.50   22.70
   4   7   0   51.89   17.10
  -4   7   0   88.09   18.90
   4   7   0   61.39   18.80
  -4   7   0   60.79   30.00
  -4   7   0   40.60   21.80
   4   7   0   77.99   25.30
   4   7   0   34.20   25.90
   4   7   0   63.29   15.40
   4   7   0   56.79   25.10
  -4   7   0   57.49   14.70
   5  -7   0  654.83   59.79
  -5  -7   0  596.94   60.59
  -5  -7   0  717.03   64.39
   5  -7   0  562.84   58.39
  -5  -7   0  696.93   57.19
  -5  -7   0  707.63   63.79
   5  -7   0  643.14   64.79
  -5  -7   0  670.23   69.99
  -5  -7   0  601.84   59.29
  -5  -7   0  687.53   67.39
  -5  -7   0  593.94   64.69
  -5  -7   0  585.24   69.99
   5  -7   0  570.24   55.89
   5  -7   0  518.35   55.49
   5  -7   0  497.55   63.39
   5  -7   0  573.74   56.49
   5  -7   0  625.14   58.49
  -5  -7   0  627.94   57.59
   5   7   0  544.15   63.29
  -5   7   0  541.85   61.69
   5   7   0  619.64   66.99
   5   7   0  560.54   56.79
  -5   7   0  598.94   56.09
   5   7   0  585.74   66.09
   5   7   0  615.44   55.79
   5   7   0  647.14   58.79
  -5   7   0  580.14   57.99
  -5   7   0  588.94   57.19
  -5   7   0  595.44   57.89
   5   7   0  558.34   57.49
  -5   7   0  619.74   57.39
  -5   7   0  578.34   65.59
  -5   7   0  641.14   57.19
  -5   7   0  654.73   67.19
   5   7   0  567.34   63.09
   5   7   0  592.94   68.59
  -5   7   0  561.34   58.09
  -5   7   0  550.84   67.89
   6  -7   0  220.58   33.80
   6  -7   0  240.38   33.80
  -6  -7   0  132.29   30.20
  -6  -7   0  232.08   38.90
  -6  -7   0  237.98   45.70
  -6  -7   0  204.68   26.80
   6  -7   0  203.58   34.00
   6  -7   0  280.77   41.70
   6  -7   0  249.48   40.40
  -6  -7   0  261.47   42.00
   6  -7   0  236.08   45.30
   6  -7   0  164.08   29.40
  -6  -7   0  245.18   31.50
   6  -7   0  192.08   25.40
  -6  -7   0  239.08   40.80
  -6  -7   0  165.08   43.90
   6  -7   0  207.08   25.80
  -6  -7   0  245.38   37.50
   6   7   0  235.48   48.70
   6   7   0  195.58   39.00
   6   7   0  232.08   33.20
   6   7   0  206.28   37.30
   6   7   0  167.38   77.39
  -6   7   0  239.08   37.00
   6   7   0  182.28   40.10
   6   7   0  261.67   32.60
  -6   7   0  194.78   41.40
  -6   7   0  246.78   34.10
   6   7   0  219.98   42.00
  -6   7   0  207.48   27.50
  -6   7   0  277.17   34.40
  -6   7   0  199.18   26.10
  -6   7   0  240.68   40.30
  -6   7   0  235.68   28.30
  -6   7   0  225.98   42.60
  -7  -7   0  141.49   33.00
   7  -7   0  164.38   31.50
   7  -7   0   89.59   23.70
  -7  -7   0   75.69   23.90
  -7  -7   0   90.69   25.30
   7  -7   0   84.39   27.10
   7  -7   0  116.29   26.50
  -7  -7   0   63.89   33.90
   7  -7   0   95.79   16.80
   7  -7   0  102.59   16.20
  -7  -7   0   99.49   28.90
  -7  -7   0  134.49   21.80
  -7  -7   0  100.59   28.90
   7  -7   0  124.49   26.20
  -7  -7   0  114.99   28.30
   7  -7   0  151.38   31.50
   7  -7   0   69.69   22.80
  -7  -7   0   92.19   22.70
  -7   7   0  135.99   35.80
   7   7   0   63.09   27.20
  -7   7   0   93.59   30.70
   7   7   0   64.99   73.39
   7   7   0  147.19   37.20
   7   7   0  107.29   24.00
   7   7   0  142.79   23.80
   7   7   0  138.69   21.50
  -7   7   0  119.99   35.10
  -7   7   0  170.68   33.60
  -7   7   0   80.29   24.80
   7   7   0  131.89   38.00
  -7   7   0   95.99   21.90
  -7   7   0  108.39   18.20
  -8  -7   0    5.80   18.00
   8  -7   0   -8.60   15.20
  -8  -7   0   31.20   13.00
  -8  -7   0   10.50   13.60
   8  -7   0   10.40   19.60
  -8  -7   0  -17.30   15.60
  -8  -7   0    7.50   20.90
   8  -7   0   11.70   27.30
   8  -7   0  -16.90   11.60
   8  -7   0   10.90   16.20
  -8  -7   0    9.20   30.30
  -8  -7   0   12.60   19.20
   8   7   0  -21.40   18.90
   8   7   0   13.50   14.80
   8   7   0    1.10   18.10
  -8   7   0    6.90    9.90
  -8   7   0    5.90   25.30
  -8   7   0  -24.60   19.60
   8   7   0   49.40   76.69
   8   7   0   18.90   24.60
  -8   7   0   25.60   17.00
  -8   7   0  -26.90   12.50
  -8   7   0   -8.30   20.00
  -8   7   0    4.50   25.90
  -8   7   0   12.40   14.70
   8   7   0    3.30   10.40
   8   7   0  -11.50   19.40
  -8   7   0  -15.80   17.30
  -9  -7   0  181.98   42.00
  -9  -7   0  176.68   49.90
  -9  -7   0  230.38   39.20
   9  -7   0  194.78   36.70
   9  -7   0  224.28   41.80
   9  -7   0  184.58   36.60
   9  -7   0  272.27   43.40
   9  -7   0  246.58   45.20
  -9  -7   0  253.07   37.20
  -9  -7   0  177.78   35.50
  -9   7   0  181.48   38.50
  -9   7   0  249.18   47.70
   9   7   0  167.88   41.90
  -9   7   0  250.67   36.40
   9   7   0  152.08   36.30
  -9   7   0  196.78   37.70
   9   7   0  179.48   36.80
  -9   7   0  275.47   46.20
   9   7   0  221.88   46.50
  -9   7   0  220.68   35.50
   9   7   0  246.88   30.20
  -9   7   0  260.97   47.80
 -10  -7   0   84.19   27.30
  10  -7   0   87.19   29.80
 -10  -7   0  100.99   26.80
 -10  -7   0   70.69   37.40
  10  -7   0   81.49   27.70
 -10  -7   0   79.19   29.00
  10  -7   0   21.70   21.00
  10  -7   0   66.79   25.40
 -10  -7   0   77.59   22.50
 -10  -7   0   92.29   33.90
 -10   7   0   30.80   24.80
 -10   7   0   85.59   36.10
  10   7   0   65.29   22.90
 -10   7   0   52.79   30.80
  10   7   0   93.89   35.80
  10   7   0  104.19   21.40
 -10   7   0   50.29   22.70
  10   7   0    7.50   33.40
 -10   7   0   74.09   30.30
  10   7   0   66.19   27.70
  11  -7   0   42.40   22.00
 -11  -7   0   37.90   19.40
 -11  -7   0   35.80   23.10
 -11  -7   0    6.30   35.50
  11  -7   0    0.10   19.10
  11  -7   0  -30.60   15.40
 -11  -7   0  -29.90   20.50
 -11  -7   0   19.30   21.70
  11  -7   0   -8.80   21.10
 -11  -7   0   77.99   32.10
  11   7   0  -17.00   19.00
 -11   7   0    8.60   25.90
  11   7   0   19.10   30.30
 -11   7   0   -8.50   23.70
  11   7   0    7.80   12.90
 -11   7   0    2.80   17.40
 -11   7   0   34.00   28.50
 -11   7   0  -11.00   21.40
  11   7   0   53.89   29.30
 -12  -7   0   39.40   19.30
 -12  -7   0   -6.10   25.40
 -12  -7   0   29.00   20.20
  12  -7   0   -4.40   18.60
  12  -7   0   37.20   24.10
  12  -7   0    8.70   22.10
 -12  -7   0   36.30   29.70
 -12  -7   0   -1.10   21.70
 -12  -7   0  -47.30   26.00
 -12   7   0   32.10   24.10
 -12   7   0   18.40   28.80
  12   7   0   97.09   36.00
 -12   7   0    6.30   23.50
  12   7   0   -0.90   23.70
  12   7   0   -2.90   33.50
 -12   7   0   63.59   33.50
 -13  -7   0   36.30   39.00
 -13  -7   0  -10.30   30.10
  13  -7   0   29.40   27.10
  13  -7   0   28.40   21.30
  13  -7   0   52.39   27.90
 -13  -7   0   18.70   35.40
  13  -7   0    9.00   27.10
 -13  -7   0   57.39   34.50
 -13  -7   0   34.10   21.40
 -13  -7   0   44.70   26.00
 -13   7   0   42.30   28.60
  13   7   0   28.30   25.90
 -13   7   0   30.50   29.10
  13   7   0   65.09   43.70
 -13   7   0   43.70   25.10
 -13   7   0   48.80   19.10
  13   7   0  -11.60   27.30
 -13   7   0   58.59   30.00
  14  -7   0   -9.80   24.40
 -14  -7   0   25.50   29.90
 -14  -7   0   10.70   19.40
  14  -7   0   -2.90   23.40
 -14  -7   0   47.00   24.30
 -14  -7   0   33.30   25.80
 -14  -7   0  -19.50   36.40
  14   7   0   82.29   42.20
  14   7   0   71.39   30.30
  14   7   0   23.00   29.40
 -14   7   0   58.69   33.50
 -14   7   0   28.50   25.00
 -14   7   0   21.50   25.60
 -14   7   0   40.40   31.70
  14   7   0  100.49  143.29
 -15  -7   0   24.20   26.40
  15  -7   0   10.40   28.80
 -15  -7   0   86.19   32.30
  15  -7   0   30.00   27.60
 -15  -7   0   64.39   27.90
 -15  -7   0   53.79   39.20
 -15  -7   0   25.10   29.50
 -15   7   0    6.90   22.40
  15   7   0  -52.29   26.70
  15   7   0    7.90   36.60
 -15   7   0   11.60   26.50
 -15   7   0    9.20   24.30
 -15   7   0   85.79   39.30
   0   8   0  421.26   64.99
   1  -8   0  287.57   37.90
  -1  -8   0  300.87   42.90
   1  -8   0  221.78   31.50
   1  -8   0  371.46   49.80
  -1  -8   0  237.18   33.70
   1  -8   0  216.08   29.20
  -1  -8   0  315.47   44.00
  -1  -8   0  294.17   53.19
  -1  -8   0  284.07   45.90
  -1  -8   0  226.78   37.10
  -1  -8   0  246.98   38.70
   1  -8   0  288.47   35.50
   1  -8   0  262.97   32.10
  -1  -8   0  247.48   30.60
   1  -8   0  302.37   53.89
   1  -8   0  257.77   35.40
   1  -8   0  288.57   41.50
   1  -8   0  323.57   49.00
  -1  -8   0  274.77   50.19
  -1   8   0  268.17   28.20
  -1   8   0  221.88   43.60
   1   8   0  223.88   36.80
   1   8   0  192.38   42.10
  -1   8   0  193.48   48.70
   1   8   0  274.97   40.70
   1   8   0  205.58   25.10
  -1   8   0  232.38   36.30
   1   8   0  248.78   28.10
  -1   8   0  246.78   29.90
  -1   8   0  337.57   46.80
   1   8   0  237.78   33.00
   1   8   0  233.38   40.40
  -1   8   0  313.87   41.40
   1   8   0  223.88   29.70
  -1   8   0  257.87   46.60
  -1   8   0  254.17   29.00
   1   8   0  267.57   54.09
   1   8   0  160.68   54.09
   1   8   0  236.98   46.00
   1   8   0  218.28   28.80
  -1   8   0  259.17   33.80
  -1   8   0  257.77   31.10
  -2  -8   0   20.90   18.50
  -2  -8   0   22.50   23.10
   2  -8   0   26.60   18.10
   2  -8   0    5.50   22.30
   2  -8   0    3.80   10.90
   2  -8   0   18.60   17.60
   2  -8   0   62.49   25.10
  -2  -8   0   -7.20   14.70
   2  -8   0    5.60   10.90
  -2  -8   0   52.89   31.30
  -2  -8   0   -6.40    7.90
   2  -8   0    2.30   12.50
  -2  -8   0   15.20   18.20
  -2  -8   0   20.30   14.20
   2  -8   0   20.00   13.80
   2  -8   0  -12.10    9.90
  -2  -8   0    4.70   14.80
  -2  -8   0    4.20   10.40
  -2  -8   0   14.80   16.90
   2  -8   0   17.30   14.40
   2  -8   0    5.50   14.90
  -2   8   0    2.70   14.00
  -2   8   0   -7.50    9.90
   2   8   0   -0.80   26.50
   2   8   0   12.80   13.40
  -2   8   0   10.60   21.90
  -2   8   0    0.20   18.90
   2   8   0   23.80   17.70
   2   8   0  -19.30   19.50
   2   8   0    8.80   17.40
  -2   8   0    9.80   11.50
   2   8   0    1.50   10.20
   2   8   0    7.80   18.90
   2   8   0   -4.20    7.80
  -2   8   0   -0.90   25.40
   2   8   0   34.40   44.20
   2   8   0   14.40    6.30
   2   8   0   17.50   22.20
  -2   8   0   12.60    9.90
  -2   8   0   -6.90    9.90
  -2   8   0    0.20   18.60
   2   8   0    9.30   11.20
  -2   8   0   21.30   14.30
   3  -8   0   86.59   21.10
  -3  -8   0  148.99   28.20
  -3  -8   0   81.39   29.20
  -3  -8   0  141.29   28.40
  -3  -8   0   97.59   23.90
   3  -8   0   64.59   27.30
   3  -8   0  119.79   28.50
   3  -8   0   90.79   19.80
   3  -8   0  112.19   23.40
   3  -8   0  174.88   32.20
   3  -8   0  126.99   25.10
  -3  -8   0   88.79   19.40
   3  -8   0   74.29   20.20
  -3  -8   0   86.49   35.30
  -3  -8   0  128.59   36.90
  -3  -8   0  132.89   24.30
   3  -8   0  133.09   32.60
  -3  -8   0  140.59   25.50
   3  -8   0  135.99   20.70
   3   8   0   42.20   54.29
   3   8   0  106.69   35.10
  -3   8   0  123.79   20.40
   3   8   0  114.39   38.00
   3   8   0  105.79   19.30
   3   8   0   89.49   24.50
  -3   8   0  130.89   24.60
  -3   8   0   60.29   28.20
  -3   8   0   96.99   21.30
   3   8   0  123.29   21.40
  -3   8   0  116.39   22.90
   3   8   0   99.29   30.90
  -3   8   0  120.99   20.70
   3   8   0  104.39   33.30
   3   8   0   35.60   25.00
  -3   8   0   79.69   34.30
   3   8   0   84.39   20.70
  -3   8   0   66.19   27.80
  -3   8   0  144.59   36.60
  -3   8   0  135.49   26.40
   3   8   0  100.09   12.70
   4  -8   0   17.90   12.30
  -4  -8   0    8.70   14.00
  -4  -8   0   55.69   19.10
  -4  -8   0   -0.80   26.60
  -4  -8   0   17.10   12.10
   4  -8   0   25.70   13.20
   4  -8   0   27.10   18.50
  -4  -8   0   32.00   23.50
  -4  -8   0   27.70   22.50
   4  -8   0    7.00    8.50
   4  -8   0   16.60   15.20
   4  -8   0   71.19   23.60
  -4  -8   0   47.90   19.80
   4  -8   0   37.70   24.30
  -4  -8   0    8.70   16.20
  -4  -8   0   13.50   14.00
   4  -8   0   22.80   22.30
   4  -8   0   24.10   15.10
   4  -8   0   27.20   15.60
  -4  -8   0   25.30   17.70
   4   8   0   20.00   18.10
  -4   8   0    3.40   22.40
   4   8   0   24.50   21.10
  -4   8   0   14.40   13.80
   4   8   0    7.80   12.80
   4   8   0   32.50   15.90
  -4   8   0   30.60   11.70
  -4   8   0   20.90   13.30
  -4   8   0   -2.20   12.70
  -4   8   0    8.30   18.30
  -4   8   0   10.00   10.90
   4   8   0   13.90   23.00
  -4   8   0    6.50   19.90
   4   8   0   28.00   14.30
  -4   8   0   17.20   14.60
   4   8   0   18.50   22.70
  -4   8   0   39.10   25.80
   4   8   0   -1.70   55.49
   4   8   0   43.60   22.70
   4   8   0   36.40   29.30
  -4   8   0   61.59   27.70
   5  -8   0  139.99   36.90
  -5  -8   0  154.48   27.40
   5  -8   0  130.69   23.30
  -5  -8   0  105.89   27.20
  -5  -8   0  124.19   27.40
   5  -8   0  126.59   32.30
  -5  -8   0  115.09   22.70
  -5  -8   0   99.09   32.60
  -5  -8   0  152.08   40.20
  -5  -8   0   97.79   25.70
   5  -8   0  103.89   29.80
  -5  -8   0  183.28   29.90
  -5  -8   0   91.19   38.30
  -5  -8   0  182.78   41.90
   5  -8   0  163.78   26.00
   5  -8   0  147.39   27.10
   5  -8   0  152.88   26.00
   5  -8   0  136.59   25.90
   5   8   0  119.79   23.80
  -5   8   0  120.69   24.00
   5   8   0  174.48   42.60
   5   8   0   97.09   33.80
  -5   8   0  151.98   27.30
   5   8   0   97.39   35.50
  -5   8   0  176.18   40.60
  -5   8   0  138.99   35.10
  -5   8   0   32.80   60.49
  -5   8   0  122.59   22.50
  -5   8   0  148.19   25.30
   5   8   0  127.69   40.50
  -5   8   0  124.69   31.90
   5   8   0  172.88   30.20
   5   8   0  113.29   25.20
   5   8   0  159.38   27.90
  -5   8   0  101.59   21.90
   5   8   0  112.69   83.09
   6  -8   0   43.40   18.00
   6  -8   0   26.70   15.30
  -6  -8   0   56.69   26.50
   6  -8   0   26.50   16.70
  -6  -8   0   33.80   16.20
   6  -8   0   35.80   24.10
  -6  -8   0   49.99   19.40
  -6  -8   0   23.80   17.80
  -6  -8   0   27.50   19.00
   6  -8   0   26.80   16.10
   6  -8   0   29.70   13.70
   6  -8   0   31.80   24.30
  -6  -8   0   44.10   34.80
   6  -8   0   65.09   19.70
  -6  -8   0   45.00   15.50
  -6   8   0   49.50   31.50
   6   8   0   63.69   19.80
  -6   8   0   35.70   27.80
   6   8   0   11.40   23.10
  -6   8   0   15.40   13.70
   6   8   0   16.70   19.90
  -6   8   0   69.59   30.00
  -6   8   0    2.70   13.10
   6   8   0    8.60   65.39
   6   8   0   87.09   33.50
   6   8   0   44.30   28.60
  -6   8   0  107.29   28.80
   6   8   0   38.50   17.10
   6   8   0   19.40   11.90
  -6   8   0   28.10   13.30
   7  -8   0  -10.20   14.50
   7  -8   0   10.20   10.20
  -7  -8   0   35.10   20.10
  -7  -8   0    8.30   16.70
  -7  -8   0  -19.90   24.20
  -7  -8   0   16.00   13.50
   7  -8   0    4.10   10.40
  -7  -8   0   12.60   16.80
  -7  -8   0   -6.50   23.80
  -7  -8   0   74.49   19.20
   7  -8   0    1.80   16.40
   7  -8   0    2.50   22.90
   7  -8   0  -14.60   13.60
  -7   8   0  -11.10   18.60
   7   8   0   -1.50   20.60
  -7   8   0  -10.30   10.90
   7   8   0  -20.30   13.00
  -7   8   0  -18.30   23.40
   7   8   0   10.80   24.90
  -7   8   0    5.30   11.90
   7   8   0   26.70   12.80
   7   8   0  -31.80   25.50
   7   8   0   15.20   73.29
   7   8   0   -8.60   22.70
  -7   8   0  -24.60   19.80
  -7   8   0    1.00   11.90
  -7   8   0   19.00   19.80
  -7   8   0   -1.70   24.20
   7   8   0    3.70   13.50
   8  -8   0    9.00   10.30
   8  -8   0  -30.70   13.20
  -8  -8   0   -5.80   27.40
   8  -8   0   -9.60   19.70
  -8  -8   0   31.80   22.30
   8  -8   0  -25.40   11.20
  -8  -8   0  -17.00   15.90
   8  -8   0   30.50   20.00
  -8  -8   0   25.20   29.40
  -8  -8   0   -7.00   17.60
  -8  -8   0    3.40   11.60
  -8  -8   0   12.20   12.30
   8   8   0  -20.50   16.20
   8   8   0   63.19   86.09
  -8   8   0   12.30   25.50
   8   8   0    2.30   21.60
   8   8   0  -16.50   11.50
   8   8   0   19.30   14.50
  -8   8   0   12.10   14.10
  -8   8   0   -3.80   22.60
  -8   8   0   19.90   15.70
   8   8   0   21.00   26.50
   8   8   0   23.70   32.80
  -8   8   0   21.60   24.60
  -8   8   0  -18.60   10.10
  -8   8   0  -29.30   21.50
   9  -8   0   89.39   27.20
  -9  -8   0   64.79   22.20
  -9  -8   0   97.39   29.80
   9  -8   0  117.99   27.30
  -9  -8   0  102.89   44.50
  -9  -8   0  130.59   30.40
   9  -8   0   80.39   26.10
  -9  -8   0  101.79   31.60
   9   8   0   87.89   34.50
  -9   8   0   83.19   27.60
  -9   8   0  146.89   35.30
  -9   8   0   44.10   27.40
   9   8   0  136.99   26.30
  -9   8   0  105.09   38.80
   9   8   0   82.49   29.10
  -9   8   0  115.29   33.40
   9   8   0  125.19   40.20
   9   8   0  102.39   31.30
  -9   8   0   71.79   27.90
 -10  -8   0  -30.30   30.00
 -10  -8   0  -15.70   15.80
  10  -8   0   42.00   23.00
 -10  -8   0   12.20   21.70
 -10  -8   0  -10.30   17.90
  10  -8   0    8.80   21.40
 -10  -8   0   31.30   26.70
  10  -8   0   13.40   17.60
  10  -8   0   31.00   27.90
 -10  -8   0   17.60   18.90
  10   8   0  -12.00   19.70
  10   8   0  -14.40   26.00
  10   8   0    1.60   21.30
 -10   8   0   38.80   23.80
  10   8   0   30.10   18.40
  10   8   0    0.90   28.90
 -10   8   0   25.10   27.20
 -10   8   0   26.60   30.50
 -10   8   0   17.10   25.40
 -10   8   0   22.40   21.20
 -11  -8   0  202.48   41.10
 -11  -8   0  164.78   38.70
 -11  -8   0  192.48   52.09
  11  -8   0  173.78   37.10
  11  -8   0  236.18   42.90
 -11  -8   0  162.48   33.60
 -11  -8   0  240.68   47.20
  11  -8   0  227.88   43.10
  11  -8   0  218.48   41.50
 -11  -8   0  195.38   46.70
 -11   8   0  163.58   41.00
  11   8   0  167.48   28.30
  11   8   0  184.08   32.00
  11   8   0  225.68   49.90
  11   8   0  202.38   51.59
  11   8   0  129.89   38.00
 -11   8   0  182.48   45.70
 -11   8   0  120.49   32.10
  11   8   0  374.36  135.89
 -11   8   0  227.48   49.10
 -11   8   0  235.38   44.70
 -12  -8   0    5.30   18.70
 -12  -8   0   35.60   34.70
  12  -8   0   35.80   23.60
 -12  -8   0   37.30   24.60
 -12  -8   0   47.90   26.10
 -12  -8   0   -9.50   21.40
  12  -8   0   32.60   25.60
  12  -8   0    3.20   22.90
 -12   8   0   16.90   26.80
  12   8   0   63.39   33.10
 -12   8   0   33.50   30.70
 -12   8   0   37.00   21.40
  12   8   0   36.20   28.30
 -12   8   0   20.60   25.70
 -12   8   0   32.90   29.90
  13  -8   0   15.70   23.70
 -13  -8   0    4.60   37.60
  13  -8   0    0.40   21.10
 -13  -8   0    8.10   16.40
 -13  -8   0   18.30   25.70
  13  -8   0   -5.80   20.70
  13  -8   0  -42.60   25.30
 -13  -8   0   -0.60   23.30
 -13  -8   0  -25.30   23.80
 -13   8   0   42.20   29.30
 -13   8   0   14.00   19.70
 -13   8   0   13.20   26.40
  13   8   0  -10.70  115.99
 -13   8   0  -12.30   23.10
  13   8   0   55.19   45.10
  13   8   0    4.50   23.70
 -13   8   0   31.50   31.90
  13   8   0   43.30   28.50
 -14  -8   0   18.80   18.20
  14  -8   0   -0.80   22.00
  14  -8   0   17.00   25.10
 -14  -8   0   70.49   40.50
  14  -8   0    0.30   25.20
 -14  -8   0   10.20   25.20
 -14  -8   0    1.40   24.00
  14   8   0    3.90   29.30
  14   8   0   23.30   47.10
 -14   8   0  105.49   42.00
 -14   8   0    8.40   25.10
  14   8   0   52.99   30.00
 -14   8   0   -1.10   29.50
 -14   8   0  -20.10   20.80
  15  -8   0   28.30   30.80
   0  -9   0   21.50   17.40
   0  -9   0   39.40   20.70
   0  -9   0    1.10   19.00
   0  -9   0   -2.20   13.00
   0  -9   0   18.90   12.90
   0  -9   0   29.60   26.10
   0  -9   0   39.80   22.20
   0  -9   0    0.10   26.00
   0  -9   0    3.60   10.60
   0  -9   0   30.60   15.90
   0   9   0   16.70   31.80
   0   9   0   23.10   13.90
   0   9   0   41.40   27.10
   0   9   0    5.80    8.10
   0   9   0    2.60    9.20
   0   9   0   31.10   18.40
   0   9   0   21.30   13.00
   0   9   0   11.40   28.70
   0   9   0   46.60   20.00
   0   9   0   13.10   23.50
   0   9   0   45.20   23.60
  -1  -9   0    9.10   16.80
   1  -9   0   14.90   15.00
   1  -9   0   10.90   11.70
   1  -9   0    8.20   18.80
  -1  -9   0   11.80   15.50
   1  -9   0   14.20   25.60
  -1  -9   0   18.60   12.70
   1  -9   0    3.10   15.50
   1  -9   0   15.50   17.40
  -1  -9   0  -22.20   23.10
   1  -9   0   -2.30   21.90
  -1  -9   0    0.10   16.50
  -1  -9   0   12.90   16.40
   1  -9   0   26.10   15.80
  -1  -9   0  -11.80    9.40
   1  -9   0    7.80   11.80
   1  -9   0   -0.70   19.40
   1   9   0   54.29   32.50
   1   9   0    1.10   11.90
   1   9   0  -11.50   42.80
   1   9   0   -0.20   18.40
  -1   9   0   26.70   26.10
   1   9   0   24.00   19.00
   1   9   0  -11.20   20.50
   1   9   0  -14.90   19.00
   1   9   0   21.30   12.40
  -1   9   0   23.20   12.40
   1   9   0   10.90    8.70
   1   9   0   29.20   20.10
  -1   9   0   45.60   26.80
  -1   9   0   19.30   14.70
   1   9   0   10.80   12.60
  -1   9   0    0.70   16.00
  -1   9   0   -4.10   18.40
   1   9   0   15.20   12.30
  -1   9   0   12.30   26.80
  -1   9   0   33.40   18.60
  -1   9   0    7.30    8.90
  -1   9   0   32.10   13.60
  -1   9   0   -2.10   11.30
  -1   9   0   22.30   38.60
   2  -9   0   94.99   22.30
  -2  -9   0   61.09   19.00
  -2  -9   0   73.99   21.40
  -2  -9   0   47.90   23.40
   2  -9   0  100.09   22.10
   2  -9   0   52.09   30.90
  -2  -9   0  130.29   40.90
   2  -9   0  142.79   36.20
   2  -9   0   62.39   21.00
  -2  -9   0  100.69   36.40
  -2  -9   0  136.39   34.10
   2  -9   0  132.29   30.10
   2  -9   0   98.09   21.70
  -2  -9   0   80.19   19.90
   2  -9   0   70.69   21.30
  -2  -9   0   87.49   23.40
  -2  -9   0   50.89   21.50
   2  -9   0   95.79   19.60
   2  -9   0   66.29   18.50
   2  -9   0   90.19   28.20
   2   9   0   72.49   31.10
   2   9   0   74.09   26.30
  -2   9   0   82.09   17.60
   2   9   0   66.49   19.00
  -2   9   0  110.09   39.10
   2   9   0   74.59   29.40
   2   9   0   65.59   31.00
   2   9   0   51.89   49.40
  -2   9   0   93.19   23.90
  -2   9   0   78.99   28.60
   2   9   0   68.29   18.60
   2   9   0   94.49   34.60
  -2   9   0   63.49   21.90
  -2   9   0   84.29   20.30
  -2   9   0   70.29   33.40
   2   9   0   91.19   19.30
  -2   9   0   89.09   21.90
   2   9   0   74.89   19.40
   2   9   0   70.09   24.80
  -2   9   0   85.09   17.90
  -2   9   0  120.89   34.00
   2   9   0   61.59   12.00
  -2   9   0   93.19   18.90
   3  -9   0    1.30   10.90
   3  -9   0    8.80   12.20
  -3  -9   0   21.60   21.10
   3  -9   0   20.30   13.70
   3  -9   0  -11.40   23.30
   3  -9   0    0.90   11.20
  -3  -9   0    1.80   13.70
   3  -9   0    5.10   14.50
  -3  -9   0   -3.40   10.60
  -3  -9   0   16.60   20.30
   3  -9   0   -6.90   17.20
  -3  -9   0   -1.90   25.70
  -3  -9   0   22.50   24.50
  -3  -9   0   22.10   16.50
   3  -9   0   27.50   16.60
   3  -9   0   -6.00   16.60
  -3  -9   0   -8.00   14.50
   3  -9   0    8.90   12.10
  -3   9   0    2.60   11.00
  -3   9   0   16.10   24.30
   3   9   0   -0.90   11.10
  -3   9   0   -8.60   12.20
   3   9   0   15.30   23.20
   3   9   0    6.80    5.30
   3   9   0    0.60   21.90
  -3   9   0   12.10   12.50
  -3   9   0   16.40    9.70
   3   9   0   -2.50   22.60
   3   9   0  -10.60   49.50
   3   9   0   16.10   15.30
  -3   9   0    8.70   26.70
   3   9   0  -16.90   18.30
  -3   9   0  -16.90    8.10
  -3   9   0    3.00   53.89
   3   9   0    5.40   11.30
  -3   9   0   -2.10   11.40
  -3   9   0   23.50   17.30
  -4  -9   0   43.80   19.50
  -4  -9   0   47.60   19.00
   4  -9   0   53.89   23.10
  -4  -9   0   20.60   18.80
   4  -9   0   40.00   17.90
   4  -9   0   44.80   12.80
   4  -9   0   15.50   14.40
   4  -9   0   49.00   15.20
  -4  -9   0   37.50   15.40
   4  -9   0   14.50   16.30
   4  -9   0   38.30   24.80
  -4  -9   0   62.69   30.50
  -4  -9   0   80.99   36.90
   4  -9   0   16.40   16.00
  -4  -9   0   36.20   17.30
  -4  -9   0   23.40   23.40
  -4   9   0   46.70   16.10
  -4   9   0   46.00   16.00
  -4   9   0   45.70   14.20
   4   9   0   32.10   13.70
  -4   9   0   38.10   26.60
  -4   9   0   30.50   33.10
  -4   9   0   55.49   17.90
   4   9   0    4.50   23.00
   4   9   0   24.50   29.30
  -4   9   0   30.70   21.90
  -4   9   0   13.80   16.80
  -4   9   0   31.10   14.10
  -4   9   0   12.90   11.10
   4   9   0   28.10   18.90
  -4   9   0   46.80   23.90
   4   9   0   53.19   25.50
   4   9   0   12.50   12.50
   4   9   0   -4.70   21.10
  -5  -9   0  244.78   36.80
   5  -9   0  197.48   31.50
  -5  -9   0  254.17   33.80
  -5  -9   0  309.57   41.40
   5  -9   0  250.17   33.30
   5  -9   0  206.78   34.30
  -5  -9   0  216.88   54.29
   5  -9   0  291.77   40.30
   5  -9   0  157.78   31.20
  -5  -9   0  277.37   41.60
  -5  -9   0  269.57   55.29
   5  -9   0  219.48   36.20
   5  -9   0  259.37   52.89
  -5  -9   0  188.38   37.30
  -5   9   0  222.48   31.70
  -5   9   0  220.78   33.50
   5   9   0  295.47   57.39
   5   9   0  214.58   41.90
  -5   9   0  140.29   44.50
   5   9   0  135.69   42.40
   5   9   0   85.49   70.29
  -5   9   0  183.88   40.70
   5   9   0  239.28   27.80
  -5   9   0  255.17   48.60
  -5   9   0  228.88   35.10
   5   9   0  240.48   37.30
   5   9   0  263.97   38.80
  -5   9   0  247.08   49.90
  -6  -9   0   19.70   32.80
   6  -9   0   17.50   15.50
   6  -9   0   15.60   28.20
  -6  -9   0   42.30   22.10
  -6  -9   0   48.30   19.20
  -6  -9   0   11.70   24.50
   6  -9   0   32.60   16.40
  -6  -9   0   49.30   21.10
   6  -9   0   48.90   18.00
  -6  -9   0   49.90   16.80
  -6  -9   0   34.10   20.80
   6  -9   0   46.70   19.10
   6  -9   0   28.50   15.80
   6  -9   0   56.49   20.40
   6  -9   0   50.59   21.00
   6   9   0    1.80   27.10
   6   9   0   29.80   20.70
   6   9   0   41.80   71.19
   6   9   0   16.70   26.00
   6   9   0   32.80   18.30
  -6   9   0   50.69   17.30
   6   9   0   -0.30   25.30
  -6   9   0   51.89   34.80
   6   9   0   20.60   21.60
  -6   9   0   94.69   23.40
  -6   9   0   40.70   27.40
  -6   9   0   36.80   16.60
  -6   9   0   13.10   26.10
  -6   9   0    6.20   25.30
   6   9   0   60.49   17.10
   7  -9   0   35.80   16.40
  -7  -9   0   12.70   17.50
  -7  -9   0  -15.00   16.60
  -7  -9   0   -2.00   14.80
   7  -9   0   14.90   28.90
   7  -9   0   15.90   17.30
  -7  -9   0    4.30   23.30
  -7  -9   0  -67.59   27.90
  -7  -9   0    6.90   15.00
   7  -9   0   -5.40   15.00
  -7  -9   0    1.00   19.20
   7  -9   0    8.90   11.60
   7  -9   0   -1.60   13.60
   7  -9   0   -1.10   17.50
  -7   9   0    5.40   13.90
   7   9   0   -6.20   28.30
   7   9   0   23.30   16.20
   7   9   0  -10.80   22.60
  -7   9   0   -0.80   15.00
  -7   9   0   19.20   32.10
   7   9   0   17.10   22.90
   7   9   0   -8.70   25.80
  -7   9   0   -1.70   39.20
  -7   9   0    9.70   21.80
   7   9   0   -5.40   78.29
  -7   9   0   75.19   27.50
   7   9   0   -7.30   15.90
  -8  -9   0    3.10   17.20
   8  -9   0   33.40   30.60
  -8  -9   0   -7.30   17.80
  -8  -9   0   25.30   15.10
  -8  -9   0   12.60   27.40
   8  -9   0   29.60   10.80
  -8  -9   0   17.90   17.10
   8  -9   0   15.00   18.10
   8  -9   0   -2.00   19.30
  -8  -9   0   40.00   36.50
   8  -9   0  -13.20   16.70
   8  -9   0  -13.30   10.50
  -8  -9   0    8.60   20.20
   8  -9   0   -1.40    9.20
   8   9   0   16.80   15.30
  -8   9   0   -9.00   11.40
  -8   9   0    6.00   12.20
   8   9   0  -10.40   16.50
   8   9   0   -1.20   29.90
  -8   9   0   11.20   24.10
   8   9   0   47.20   32.80
   8   9   0   -0.60   19.40
  -8   9   0  -14.00   21.30
   8   9   0   22.70   24.40
   8   9   0   42.40   94.09
  -8   9   0   35.90   31.50
  -8   9   0    3.10   26.80
  -9  -9   0   -0.30   35.90
   9  -9   0   29.30   21.50
  -9  -9   0    8.70   13.60
  -9  -9   0   72.79   35.90
   9  -9   0   12.70   27.30
  -9  -9   0    7.30   22.70
   9  -9   0   -1.20   18.00
  -9  -9   0   -5.20   14.10
  -9  -9   0    5.70   22.80
   9  -9   0    5.20   19.30
  -9  -9   0    6.60   20.90
  -9   9   0   -9.40   26.50
   9   9   0   18.60   13.60
  -9   9   0    3.20   27.90
   9   9   0   24.70   18.30
   9   9   0   29.70   31.20
   9   9   0   22.80   31.10
  -9   9   0  -11.30   20.60
  -9   9   0   12.60   27.20
  -9   9   0    6.20   21.90
  -9   9   0    4.40   10.90
 -10  -9   0   12.30   23.40
 -10  -9   0   17.50   22.30
 -10  -9   0   10.60   15.90
 -10  -9   0   54.09   43.20
  10  -9   0  -20.50   17.50
 -10  -9   0  -21.60   20.80
  10  -9   0   20.90   23.70
  10  -9   0   -5.90   18.40
  10  -9   0  -14.90   39.80
  10   9   0   38.90   32.70
  10   9   0  -12.30   20.30
 -10   9   0  -22.20   19.80
  10   9   0   25.20   17.50
 -10   9   0    3.80   19.20
  10   9   0   38.30   34.60
  10   9   0   -7.70   21.60
 -10   9   0   34.10   32.50
 -10   9   0  -25.80   23.30
 -10   9   0   -8.30   29.40
 -11  -9   0   11.10   35.20
  11  -9   0   26.60   25.50
  11  -9   0    4.50   24.90
  11  -9   0   42.00   27.20
 -11  -9   0    2.80   19.40
 -11  -9   0    7.50   22.80
 -11  -9   0   -1.60   30.00
 -11  -9   0    0.10   14.60
 -11  -9   0   16.30   21.80
  11  -9   0    7.70   22.50
  11   9   0  -23.90   23.60
  11   9   0  -35.10   25.70
 -11   9   0  -10.20   21.70
  11   9   0  357.46  156.68
 -11   9   0  -44.40   24.50
 -11   9   0   35.10   33.40
  11   9   0   37.40   20.30
  11   9   0   12.70   29.70
 -11   9   0   -5.60   25.90
 -11   9   0   21.40   33.90
  11   9   0  -17.40   19.30
 -12  -9   0   15.40   23.40
 -12  -9   0  -40.70   16.80
 -12  -9   0   -0.80   15.50
  12  -9   0   26.60   24.40
  12  -9   0   45.70   23.50
  12  -9   0    8.20   20.20
  12  -9   0   -4.80   19.80
 -12  -9   0   21.40   41.30
 -12  -9   0  -53.49   33.90
 -12  -9   0   -1.30   17.10
 -12   9   0    9.10   27.60
 -12   9   0  -61.59   25.90
  12   9   0  -23.60   14.10
 -12   9   0   33.00   30.10
 -12   9   0  -17.70   29.90
  12   9   0  -24.00   19.40
 -12   9   0   -8.30   17.90
  12   9   0  -26.90   28.40
  12   9   0  -44.90   28.70
 -13  -9   0   23.80   29.30
 -13  -9   0   18.40   28.60
  13  -9   0    8.00   20.90
 -13  -9   0   -5.30   40.20
  13  -9   0   11.90   24.60
  13  -9   0  -23.70   21.30
 -13  -9   0   -9.10   20.70
 -13  -9   0   40.20   23.20
 -13   9   0   37.00   32.50
  13   9   0   22.00   33.40
 -13   9   0   30.20   24.40
  13   9   0  -15.20   24.60
  13   9   0   12.60   29.50
 -13   9   0   -8.40   53.09
 -13   9   0  -19.60   28.10
  14  -9   0   20.50   25.80
 -14  -9   0   -9.00   30.10
  14  -9   0   -4.90   25.90
 -14  -9   0   14.00   25.70
 -14  -9   0  122.39   51.79
  14  -9   0    3.20   25.30
 -14  -9   0   -1.60   28.00
  14   9   0   25.10   33.60
  14   9   0   24.30   40.30
 -14   9   0   22.90   31.00
  14   9   0  -30.80   41.70
 -14   9   0    2.60   31.50
 -14   9   0   31.70   36.20
   0 -10   0   85.59   35.10
   0 -10   0  123.19   35.50
   0 -10   0   84.39   30.50
   0 -10   0   68.19   22.20
   0 -10   0   81.89   20.40
   0 -10   0  104.59   27.80
   0 -10   0  114.59   27.80
   0  10   0  105.49   32.80
   0  10   0  106.49   36.60
   0  10   0  100.29   26.60
   0  10   0   21.60   17.50
   1 -10   0  105.49   35.50
  -1 -10   0   44.70   21.50
   1 -10   0   68.29   20.10
  -1 -10   0   26.80   21.50
  -1 -10   0   58.79   34.00
  -1 -10   0   34.70   17.50
  -1 -10   0    7.30   14.00
   1 -10   0   65.49   18.90
   1 -10   0   71.79   37.60
   1 -10   0   70.09   23.20
  -1 -10   0   36.80   19.30
   1 -10   0   83.39   28.10
   1 -10   0   56.79   22.00
  -1 -10   0   43.00   20.90
  -1 -10   0   53.79   30.40
   1 -10   0   71.89   31.20
  -1 -10   0   28.40   25.30
  -1 -10   0  107.79   31.80
   1 -10   0   56.19   25.70
   1 -10   0   60.59   23.50
   1  10   0   39.10   21.80
  -1  10   0   60.29   23.80
   1  10   0   49.10   31.60
   1  10   0   40.30   32.20
   1  10   0   44.80   24.10
   1  10   0   61.99   18.60
   1  10   0    9.00   14.20
  -1  10   0  102.99   49.30
  -1  10   0   61.69   17.50
   1  10   0   21.90   23.10
  -1  10   0   61.59   14.70
  -1  10   0   47.10   36.70
   1  10   0   50.79   23.80
   1  10   0   36.70   51.79
   1  10   0   32.80   13.90
  -1  10   0   63.69   22.30
  -1  10   0   46.00   31.70
  -1  10   0   49.20   25.20
  -1  10   0   35.70   14.50
  -1  10   0   43.80   31.50
   1  10   0   30.30   10.20
  -1  10   0   55.99   18.10
  -1  10   0  114.69   31.60
   1  10   0   51.39   32.50
  -2 -10   0   56.89   21.10
  -2 -10   0   89.19   26.20
   2 -10   0   57.89   23.00
  -2 -10   0   65.19   20.70
   2 -10   0   44.90   29.50
   2 -10   0   65.49   20.10
   2 -10   0   30.80   14.50
   2 -10   0   59.99   20.60
   2 -10   0   57.89   19.50
  -2 -10   0   70.79   32.10
  -2 -10   0   68.89   21.80
  -2 -10   0   89.69   25.50
   2 -10   0   58.19   19.00
   2 -10   0   84.29   19.10
   2 -10   0   75.59   23.70
  -2  10   0   56.39   22.40
  -2  10   0   57.69   16.70
  -2  10   0   75.89   21.90
   2  10   0   29.90   28.10
  -2  10   0   55.99   18.00
  -2  10   0   63.29   35.70
   2  10   0   34.50   29.10
  -2  10   0   37.20   35.30
  -2  10   0   13.90   21.70
   2  10   0   60.79   11.50
  -2  10   0   33.70   15.80
  -2  10   0   63.69   30.40
   2  10   0   32.80   19.80
  -2  10   0   23.00   26.60
  -2  10   0   69.89   21.90
   2  10   0   75.19   27.80
   2  10   0    2.80   21.80
   2  10   0   55.49   16.20
   2  10   0   32.30   23.60
  -3 -10   0   -5.50   18.60
  -3 -10   0   25.10   28.70
   3 -10   0   13.30   13.10
  -3 -10   0   14.30   16.40
   3 -10   0    6.90   16.70
  -3 -10   0   -1.20   17.00
   3 -10   0    4.30   16.10
  -3 -10   0  -30.90   20.10
   3 -10   0   -1.90   13.00
   3 -10   0   20.70   14.00
   3 -10   0   33.40   28.60
  -3 -10   0   19.40   16.90
   3 -10   0  -12.20   11.50
  -3 -10   0    4.00   11.70
  -3  10   0   -7.00   11.80
   3  10   0  -57.09   16.90
   3  10   0   26.60   11.80
   3  10   0    0.70    5.00
   3  10   0   -6.50   20.00
  -3  10   0   19.50   12.50
  -3  10   0   21.90   12.50
   3  10   0   -9.60   16.40
  -3  10   0   -2.60   23.20
  -3  10   0   11.80   25.60
  -3  10   0    6.60   17.80
   3  10   0   15.90   27.50
   3  10   0   -1.80   61.59
  -3  10   0   10.30   30.20
   3  10   0   41.70   24.20
  -3  10   0  -19.30   22.10
  -3  10   0  -12.70   31.60
   4 -10   0    4.50   10.70
   4 -10   0   -4.50   15.30
  -4 -10   0   21.70   19.30
  -4 -10   0   -8.10   17.50
   4 -10   0   -9.20   14.10
   4 -10   0   26.50   16.60
   4 -10   0   -2.10   12.80
  -4 -10   0   16.10   16.50
   4 -10   0    4.70   29.20
  -4 -10   0   -7.00   29.80
   4 -10   0   -6.10   13.70
  -4 -10   0   14.90   27.20
  -4 -10   0   18.20   18.80
   4 -10   0   47.60   20.80
   4  10   0   -1.00   19.10
  -4  10   0   22.20   29.30
  -4  10   0   15.60   23.00
  -4  10   0  -11.20   34.50
   4  10   0   36.30   28.60
   4  10   0   50.09   62.69
   4  10   0   11.40   25.60
  -4  10   0   10.60   14.30
   4  10   0    4.00   10.10
  -4  10   0   25.80   29.40
  -4  10   0   -6.30    9.90
   4  10   0   59.19   31.20
  -4  10   0  -10.90   12.70
   4  10   0    9.60   21.30
   5 -10   0   23.70   19.90
   5 -10   0   -4.70   12.30
  -5 -10   0   -2.70   18.10
   5 -10   0    1.40   17.20
  -5 -10   0   13.80   18.10
  -5 -10   0    7.10   14.60
   5 -10   0   50.49   32.20
   5 -10   0   20.90    9.00
   5 -10   0   32.50   19.20
   5 -10   0   14.60   15.30
  -5 -10   0   31.00   26.20
   5 -10   0    6.20   11.70
  -5 -10   0   -2.40   28.90
  -5 -10   0   11.40   18.60
  -5 -10   0   17.30   15.70
  -5  10   0  -15.90   30.50
  -5  10   0   22.20   31.50
  -5  10   0   21.10   18.50
  -5  10   0   -5.10   23.50
   5  10   0   54.99   30.60
   5  10   0   28.70   33.80
  -5  10   0   -1.10   11.40
   5  10   0   11.20   20.60
   5  10   0  -19.90   68.59
   5  10   0   17.80   20.40
  -5  10   0   25.70   27.80
   5  10   0   -4.90   26.80
  -6 -10   0  391.96   51.49
  -6 -10   0  462.25   47.60
  -6 -10   0  438.86   79.69
   6 -10   0  425.66   48.60
   6 -10   0  450.05   74.29
  -6 -10   0  411.86   49.10
  -6 -10   0  461.35   54.79
   6 -10   0  450.85   52.19
  -6 -10   0  500.75   53.39
   6 -10   0  448.76   47.40
   6 -10   0  410.56   49.90
  -6 -10   0  518.85   76.29
   6 -10   0  447.46   47.60
   6 -10   0  463.55   47.50
   6  10   0  432.36   63.59
   6  10   0  398.46   48.90
  -6  10   0  389.36   44.80
  -6  10   0  421.16   55.89
  -6  10   0  438.06   74.99
  -6  10   0  459.05   59.49
   6  10   0  465.35   76.49
   6  10   0  441.36   69.39
   6  10   0  426.66   66.49
  -6  10   0  398.36   67.19
   6  10   0  307.37  107.89
  -6  10   0  442.06   48.30
   7 -10   0   36.20   20.50
   7 -10   0   52.69   30.00
  -7 -10   0   35.80   22.80
   7 -10   0   25.00   17.20
   7 -10   0   76.39   25.20
  -7 -10   0   75.69   33.60
  -7 -10   0   45.70   20.20
  -7 -10   0   21.50   20.30
   7 -10   0   24.80   22.00
   7 -10   0   92.99   21.00
  -7 -10   0    0.10   18.20
  -7 -10   0   74.59   41.50
  -7 -10   0   56.29   23.30
   7 -10   0   55.69   18.50
  -7  10   0   12.10   24.50
   7  10   0   11.50   18.80
  -7  10   0   -9.30   28.20
  -7  10   0   38.20   27.30
  -7  10   0   37.50   16.00
  -7  10   0   58.09   31.60
  -7  10   0   41.60   17.80
   7  10   0   34.50   32.70
   7  10   0    8.50   26.80
   7  10   0  -10.60   29.90
   7  10   0   23.90   22.10
  -8 -10   0   20.30   25.90
  -8 -10   0   -9.10   34.10
   8 -10   0   42.30   22.20
  -8 -10   0   46.80   25.80
  -8 -10   0   68.99   26.70
  -8 -10   0   46.00   21.00
   8 -10   0   22.10   32.50
   8 -10   0   25.50   14.10
   8 -10   0   58.19   17.00
   8 -10   0    2.50   20.80
  -8 -10   0   64.99   33.60
   8 -10   0   26.40   20.20
  -8 -10   0   38.90   21.00
  -8  10   0   36.80   18.20
  -8  10   0   61.69   18.20
  -8  10   0   37.00   28.50
  -8  10   0   45.10   30.00
   8  10   0   16.10   27.80
  -8  10   0   32.40   32.90
   8  10   0   24.70   34.50
   8  10   0   14.60   28.50
   8  10   0   22.20   31.80
   8  10   0   26.20   18.40
  -8  10   0   39.80   32.60
   9 -10   0   18.40   18.70
  -9 -10   0   48.50   18.10
  -9 -10   0   63.39   25.80
   9 -10   0   78.59   37.40
  -9 -10   0   37.00   18.40
   9 -10   0   44.90   15.70
  -9 -10   0   12.90   21.80
  -9 -10   0  162.68   41.90
   9 -10   0   28.30   24.20
  -9 -10   0   50.29   45.40
   9 -10   0   38.70   24.10
  -9 -10   0   68.49   30.30
   9  10   0   94.79   25.10
  -9  10   0   47.20   27.40
   9  10   0   51.49   17.30
  -9  10   0   34.10   14.60
  -9  10   0   27.10   35.30
   9  10   0   47.70   30.40
  -9  10   0   16.10   27.50
   9  10   0   24.50   40.80
  -9  10   0   70.49   35.30
  -9  10   0   76.09   33.40
   9  10   0  106.89   42.50
  10 -10   0   42.10   25.10
 -10 -10   0   28.50   27.50
  10 -10   0    8.80   30.70
  10 -10   0   54.29   26.20
 -10 -10   0   45.20   26.20
  10 -10   0   31.90   24.10
 -10 -10   0   34.40   18.50
 -10 -10   0   53.79   29.80
 -10 -10   0   29.40   43.90
  10  10   0   50.49   33.50
  10  10   0   56.69   28.40
 -10  10   0   23.30   28.80
 -10  10   0   36.30   25.60
 -10  10   0   92.69   40.50
  10  10   0   -1.00   30.00
  10  10   0   65.79   23.40
  10  10   0   42.10   27.30
 -10  10   0   13.60   28.50
 -10  10   0   33.50   30.60
  11 -10   0    7.80   21.90
 -11 -10   0  -12.50   36.20
 -11 -10   0   13.30   22.60
 -11 -10   0    7.90   19.00
 -11 -10   0   -2.90   24.00
 -11 -10   0   39.60   24.80
  11 -10   0   28.20   25.50
 -11 -10   0   64.29   41.40
  11 -10   0    8.80   25.20
  11  10   0   14.40   33.10
 -11  10   0    0.50   32.50
 -11  10   0   -1.20   28.20
  11  10   0   53.19   30.40
  11  10   0    1.30   35.00
 -11  10   0   24.40   25.40
  11  10   0   22.20   37.60
 -11  10   0    2.80   31.00
 -11  10   0   44.40   22.90
 -12 -10   0    2.80   18.50
  12 -10   0   58.39   28.70
 -12 -10   0  -26.00   21.90
 -12 -10   0  -18.10   21.70
  12 -10   0   33.80   25.70
  12 -10   0   46.00   30.20
 -12 -10   0   -9.60   22.40
 -12 -10   0   12.80   43.00
  12 -10   0  -10.10   21.90
 -12  10   0    4.30   19.60
 -12  10   0   63.99   37.90
  12  10   0   -8.10   20.80
  12  10   0  -14.80   28.20
  12  10   0   24.90   42.50
 -12  10   0    6.20   33.10
  12  10   0   12.50   17.00
  12  10   0  -21.50   28.00
 -12  10   0   -9.50   25.30
 -13 -10   0  -40.40   20.80
 -13 -10   0  -54.79   34.90
 -13 -10   0   12.70   24.50
 -13 -10   0  -21.60   14.70
  13 -10   0    5.80   22.10
  13 -10   0   47.60   27.20
  13 -10   0  -11.40   22.30
 -13 -10   0   10.20   20.20
 -13  10   0  -13.10   33.60
 -13  10   0   -8.10   26.50
  13  10   0   22.90   41.20
 -13  10   0   43.60   31.50
 -13  10   0   34.00   31.90
  13  10   0   11.70   27.80
  13  10   0   62.19   25.20
  14 -10   0   57.99   33.20
 -14 -10   0   41.60   29.70
 -14 -10   0   61.09   26.70
  14 -10   0   13.10   25.60
 -14 -10   0   33.20   40.40
  14 -10   0   -1.80   26.00
 -14 -10   0   15.20   30.50
 -14 -10   0   90.89   33.30
 -14  10   0   62.99   38.30
  14  10   0  -46.00   39.60
 -14  10   0    1.70   19.70
  14  10   0   64.49   52.29
 -14  10   0   92.99   44.80
 -14  10   0   20.30   29.20
  14  10   0  -35.50   29.40
   0 -11   0   17.80   28.10
   0 -11   0   42.30   16.60
   0 -11   0   20.90   14.80
   0 -11   0   30.30   22.90
   0 -11   0    2.10   16.80
   0 -11   0   17.40   15.90
   0  11   0   10.30    9.60
   0  11   0   58.19   33.50
   0  11   0   24.10   15.20
   0  11   0    6.20   18.50
   0  11   0   17.10   28.80
   0  11   0   49.30   26.90
   0  11   0   62.09   56.89
   0  11   0   24.00   21.20
   0  11   0   63.19   23.10
   1 -11   0  105.99   26.40
   1 -11   0  106.19   28.30
   1 -11   0  102.79   25.40
  -1 -11   0  138.39   33.40
  -1 -11   0   88.09   23.50
   1 -11   0   91.49   22.80
  -1 -11   0  129.69   44.60
   1 -11   0  128.29   41.10
  -1 -11   0  110.79   27.10
  -1 -11   0   73.39   19.80
   1 -11   0  101.89   22.90
  -1 -11   0   97.59   27.90
  -1  11   0   70.89   29.60
  -1  11   0   93.19   41.00
  -1  11   0  105.99   37.70
   1  11   0   96.39   32.30
  -1  11   0  120.09   31.70
  -1  11   0   86.49   22.00
   1  11   0   73.09   26.00
  -1  11   0  105.69   44.60
   1  11   0  124.69   28.10
  -1  11   0   83.59   27.30
   1  11   0  131.79   42.60
   1  11   0   82.69   17.20
   1  11   0   65.09   59.09
   1  11   0  100.89   30.60
   1  11   0  118.79   37.40
  -1  11   0  118.19   58.79
   2 -11   0   21.60   16.60
   2 -11   0    0.80   13.90
  -2 -11   0   -7.10   25.40
   2 -11   0   18.10   19.50
  -2 -11   0   -2.90   12.80
  -2 -11   0  -22.30   16.40
   2 -11   0   17.40   30.60
   2 -11   0   12.40   17.00
   2 -11   0  -16.10   13.10
  -2 -11   0  -11.40   15.10
   2 -11   0   18.40   20.40
   2 -11   0   27.50   17.10
   2 -11   0  -18.20   14.40
   2  11   0   16.60   29.50
   2  11   0   -7.90   13.50
  -2  11   0   20.70   27.60
  -2  11   0  -25.60   44.70
  -2  11   0   12.80   12.10
   2  11   0   16.30   24.00
  -2  11   0   -5.40   10.30
   2  11   0   -5.00    6.40
  -2  11   0   25.10   27.60
   2  11   0   24.80   24.30
  -2  11   0   25.10   36.10
   2  11   0    9.40   19.90
  -2  11   0    7.50   19.90
  -2  11   0   19.70   25.60
   2  11   0  -11.50   30.30
  -2  11   0   -1.30   23.30
  -3 -11   0   64.49   23.10
   3 -11   0   50.79   16.80
  -3 -11   0   40.00   24.30
   3 -11   0   59.49   23.40
  -3 -11   0   63.29   37.90
  -3 -11   0   91.09   26.20
   3 -11   0   41.00   18.30
   3 -11   0   60.59   22.90
  -3 -11   0  106.59   28.50
   3 -11   0   83.49   20.00
   3 -11   0   37.60   20.20
   3 -11   0   30.80   19.50
   3 -11   0   36.70   18.90
  -3 -11   0   62.49   19.70
   3 -11   0   16.70   31.80
   3  11   0   50.49   10.10
  -3  11   0   75.49   35.50
  -3  11   0   79.99   17.40
  -3  11   0   84.59   39.60
   3  11   0   80.69   33.20
  -3  11   0   52.29   25.30
  -3  11   0   36.50   30.10
   3  11   0   19.90   25.70
   3  11   0   59.09   23.90
   3  11   0   87.69   36.20
  -3  11   0   48.70   22.30
  -3  11   0   39.00   46.50
  -3  11   0   27.80   27.70
   3  11   0   30.10   34.90
   4 -11   0  234.78   29.40
  -4 -11   0  249.68   36.60
  -4 -11   0  280.27   45.20
   4 -11   0  271.97   55.39
   4 -11   0  333.17   45.30
  -4 -11   0  176.88   56.89
  -4 -11   0  267.57   42.70
  -4 -11   0  360.36   49.60
   4 -11   0  259.07   38.80
   4 -11   0  282.67   44.90
   4 -11   0  211.38   32.90
  -4 -11   0  264.77   41.40
   4 -11   0  190.08   34.30
   4  11   0  191.28   20.70
   4  11   0  240.18   49.50
  -4  11   0  266.27   57.09
  -4  11   0  271.17   50.19
  -4  11   0  186.58   56.99
   4  11   0  250.17   51.79
  -4  11   0  293.57   33.40
   4  11   0  229.18   48.10
   4  11   0  250.27   55.39
  -4  11   0  216.58   33.00
  -4  11   0  224.58   54.09
  -4  11   0  254.17   40.20
  -5 -11   0   -1.70   15.70
   5 -11   0   34.00   17.90
   5 -11   0  -27.30   15.30
  -5 -11   0    0.00   18.40
  -5 -11   0    2.50   18.50
   5 -11   0   12.20   18.60
   5 -11   0    7.90   15.60
   5 -11   0   12.80   31.90
  -5 -11   0   -0.20   19.00
  -5 -11   0   14.40   22.40
   5 -11   0   -4.80   14.40
   5 -11   0   -2.00    9.40
  -5 -11   0   80.79   43.40
  -5  11   0   24.70   30.00
   5  11   0  -27.70   25.10
   5  11   0   -1.10   22.80
  -5  11   0   19.60   35.60
  -5  11   0    8.20   30.90
   5  11   0  -20.90   24.50
   5  11   0   -8.20   21.40
   5  11   0   18.70   29.90
  -5  11   0   10.40   20.80
  -5  11   0   -8.50   11.40
   5  11   0  -27.00   75.29
  -5  11   0   21.40   24.40
   6 -11   0  340.57   47.40
  -6 -11   0  273.77   44.40
  -6 -11   0  237.88   46.20
   6 -11   0  270.77   43.30
  -6 -11   0  263.07   68.19
   6 -11   0  328.57   59.49
  -6 -11   0  265.97   44.80
  -6 -11   0  215.88   43.30
   6 -11   0  301.77   36.00
   6 -11   0  184.58   38.10
   6 -11   0  325.67   48.30
  -6 -11   0  290.07   41.20
   6 -11   0  263.97   40.60
   6  11   0  194.98   51.79
   6  11   0  189.38   46.00
  -6  11   0  267.17   40.70
  -6  11   0  275.57   57.99
   6  11   0  244.38   57.19
   6  11   0  272.27   62.99
   6  11   0  231.38   42.30
  -6  11   0  266.37   61.79
  -6  11   0  202.08   47.70
  -6  11   0  334.57   60.79
   7 -11   0   -0.60   17.00
  -7 -11   0    1.50   19.90
   7 -11   0  -19.80   16.20
   7 -11   0    6.50   19.20
  -7 -11   0    1.80   39.10
  -7 -11   0   35.80   23.10
   7 -11   0   -7.70   16.60
   7 -11   0   18.00   16.20
  -7 -11   0   12.20   19.90
  -7 -11   0   59.89   25.40
  -7 -11   0   -3.90   13.90
   7 -11   0   -8.10   28.20
   7 -11   0   -6.70   15.40
   7  11   0  -13.40   22.10
  -7  11   0  -11.40   34.80
  -7  11   0  -11.00   23.20
  -7  11   0   18.10   30.60
   7  11   0    1.90   25.10
   7  11   0   23.80   30.10
   7  11   0   29.40   36.00
  -7  11   0  -22.30   11.80
  -7  11   0   38.90   18.30
   7  11   0  -13.60   18.00
  -7  11   0   20.20   28.90
  -8 -11   0   -4.20   40.00
   8 -11   0   48.10   18.60
   8 -11   0   22.60   19.50
  -8 -11   0   62.69   25.50
   8 -11   0   84.79   30.80
  -8 -11   0   60.29   24.30
   8 -11   0   -0.40   17.40
  -8 -11   0   63.89   28.10
  -8 -11   0    5.10   20.90
   8 -11   0   94.49   35.30
  -8 -11   0   -7.20   13.50
   8 -11   0   32.00   18.50
   8 -11   0   54.69   16.50
  -8  11   0   39.10   18.30
  -8  11   0   45.20   30.60
   8  11   0   28.00   28.90
  -8  11   0   47.60   38.40
  -8  11   0    1.90   26.30
   8  11   0  -25.40   26.90
   8  11   0   44.00   33.10
   8  11   0   44.20   26.80
  -8  11   0    5.80   16.10
   8  11   0    5.80   19.80
  -8  11   0  105.69   42.20
   9 -11   0  -12.00   17.80
  -9 -11   0   -5.00   36.60
  -9 -11   0   -6.30   18.60
   9 -11   0   20.90   23.60
  -9 -11   0    5.80   18.20
   9 -11   0  -14.70   20.30
   9 -11   0   14.90   21.20
  -9 -11   0   22.70   23.60
  -9 -11   0   -0.60   18.60
   9 -11   0    8.70   16.10
  -9 -11   0  -34.00   19.90
  -9  11   0   28.80   27.70
   9  11   0   -3.00   55.69
   9  11   0   27.20   17.00
  -9  11   0   13.40   14.90
  -9  11   0  -11.20   26.70
  -9  11   0   55.89   38.00
   9  11   0   49.70   32.30
   9  11   0   43.40   28.20
  -9  11   0   24.30   25.30
 -10 -11   0   17.40   26.40
 -10 -11   0   16.20   21.20
  10 -11   0   19.10   21.40
 -10 -11   0   21.50   16.90
 -10 -11   0  -10.20   16.50
 -10 -11   0   18.90   39.90
  10 -11   0   23.70   32.00
  10 -11   0  -24.50   20.70
  10 -11   0  -29.10   17.20
 -10 -11   0  -18.10   24.00
 -10  11   0   29.30   35.20
  10  11   0    4.30   26.70
 -10  11   0   12.80   30.30
 -10  11   0  -13.30   21.40
 -10  11   0  -27.90   26.70
 -10  11   0  -14.80   22.70
  10  11   0    0.00   32.80
 -11 -11   0   54.49   50.99
 -11 -11   0   28.80   26.90
 -11 -11   0   24.20   23.90
  11 -11   0  -17.70   26.60
  11 -11   0  -12.40   23.90
  11 -11   0   -3.40   22.90
  11 -11   0  -12.00   19.50
 -11 -11   0   30.40   19.60
 -11  11   0   69.19   35.00
 -11  11   0  -22.80   17.10
 -11  11   0   28.30   42.40
  11  11   0   40.80   32.10
  11  11   0    8.10   34.00
 -11  11   0    7.60   30.20
  11  11   0   14.30   26.30
 -11  11   0  -30.70   34.90
  11  11   0   14.60   30.30
 -12 -11   0   26.00   28.80
  12 -11   0   12.70   24.40
  12 -11   0  -65.79   57.29
  12 -11   0   20.70   23.20
 -12 -11   0   13.70   29.10
 -12 -11   0  -18.70   16.20
  12 -11   0   -1.90   22.00
 -12 -11   0   -9.80   34.80
 -12 -11   0  -19.00   14.50
 -12  11   0   15.70   24.60
  12  11   0   60.79   35.00
  12  11   0    6.40   31.10
 -12  11   0   44.00   28.50
  12  11   0   89.19   51.69
 -12  11   0   22.00   34.80
 -12  11   0   50.19   34.90
  13 -11   0  -27.00   24.00
 -13 -11   0   -6.30   26.50
  13 -11   0   -4.60   25.70
 -13 -11   0   28.00   34.50
  13 -11   0  -11.80   25.30
 -13 -11   0  -17.80   16.00
 -13 -11   0   39.00   26.00
 -13 -11   0   -2.10   41.80
 -13  11   0   27.10   37.30
  13  11   0  -16.70   40.10
 -13  11   0   51.29   26.30
 -13  11   0   35.10   35.70
  13  11   0   38.90   30.20
  13  11   0   29.00   33.10
 -13  11   0   64.89   40.10
   0 -12   0  371.86   52.79
   0 -12   0  300.87   44.70
   0 -12   0  319.27   47.90
   0 -12   0  344.77   41.20
   0 -12   0  464.75   78.59
   0 -12   0  416.16   48.40
   0  12   0  327.47   36.20
   0  12   0  324.37   85.59
   0  12   0  387.66   58.29
   0  12   0  328.07   68.49
   0  12   0  306.87   39.60
   0  12   0  374.06   56.69
   0  12   0  254.47   59.19
   0  12   0  332.87   55.79
  -1 -12   0  315.37   48.90
   1 -12   0  291.37   40.90
   1 -12   0  215.68   58.49
   1 -12   0  247.68   41.10
  -1 -12   0  282.67   43.10
   1 -12   0  320.27   52.29
   1 -12   0  272.17   45.60
  -1 -12   0  217.98   37.60
  -1 -12   0  289.57   66.19
  -1 -12   0  246.48   40.80
   1 -12   0  313.37   40.90
  -1  12   0  306.57   65.29
   1  12   0  335.77   55.69
  -1  12   0  235.28   55.89
   1  12   0  255.07   30.00
   1  12   0  316.87   59.39
   1  12   0  195.28   47.00
  -1  12   0  336.77   52.99
   1  12   0  327.57   53.59
   1  12   0  303.67   41.00
  -1  12   0  227.18   30.50
  -1  12   0  343.27   51.19
   1  12   0  305.97   65.49
  -1  12   0  275.37   79.29
  -1  12   0  239.18   47.90
   2 -12   0  131.29   30.50
   2 -12   0  205.38   34.10
   2 -12   0  157.78   31.60
   2 -12   0  102.79   27.50
  -2 -12   0  125.29   29.50
  -2 -12   0  100.59   32.80
  -2 -12   0  100.09   43.30
   2 -12   0  145.79   27.10
   2 -12   0   16.90   35.80
  -2 -12   0   85.99   28.20
   2 -12   0   86.59   24.00
   2  12   0  155.38   37.90
  -2  12   0  137.99   33.40
  -2  12   0   88.49   44.70
  -2  12   0  125.89   35.50
   2  12   0   45.90   69.29
   2  12   0   67.39   32.40
   2  12   0   78.69   32.50
  -2  12   0  111.59   33.50
  -2  12   0   76.69   46.60
   2  12   0  131.49   51.59
  -2  12   0  111.79   23.60
  -2  12   0  117.79   39.10
   2  12   0   82.19   16.70
   2  12   0  121.89   43.80
   2  12   0  115.69   24.80
   3 -12   0   58.99   43.90
  -3 -12   0   82.19   44.70
   3 -12   0   91.69   24.20
  -3 -12   0  166.28   36.10
  -3 -12   0  183.68   35.40
   3 -12   0  148.89   30.00
   3 -12   0  163.08   33.20
   3 -12   0  146.09   28.60
   3 -12   0  135.09   32.20
   3 -12   0  118.19   31.70
  -3 -12   0  191.38   35.50
   3  12   0   99.79   29.20
   3  12   0  109.39   16.90
   3  12   0  103.19   37.60
  -3  12   0  104.39   37.80
  -3  12   0  205.68   57.89
   3  12   0  122.59   45.40
  -3  12   0  211.98   51.09
   3  12   0   86.49   76.69
   3  12   0   75.39   37.20
   3  12   0  143.99   44.90
  -3  12   0  155.28   59.99
  -3  12   0  118.59   32.90
  -3  12   0  162.28   26.50
  -3  12   0  147.99   33.10
  -3  12   0  147.09   45.60
   4 -12   0   27.60   20.10
  -4 -12   0   56.99   23.10
  -4 -12   0   74.69   21.20
   4 -12   0   37.20   23.40
   4 -12   0   36.90   18.90
  -4 -12   0   16.60   22.90
   4 -12   0   56.19   41.60
   4 -12   0   13.40   15.00
   4 -12   0   17.00   13.90
   4 -12   0   78.39   26.30
   4 -12   0   10.50   19.90
  -4 -12   0   37.90   21.90
  -4 -12   0  -24.60   30.80
  -4  12   0   73.69   17.60
   4  12   0   27.30   31.40
   4  12   0   59.29   32.50
   4  12   0   64.89   31.20
  -4  12   0   49.30   19.90
  -4  12   0  106.99   41.70
  -4  12   0   57.29   43.50
  -4  12   0   96.79   38.60
   4  12   0  110.39   41.90
  -4  12   0   43.10   23.80
   4  12   0   29.30    7.40
   4  12   0   32.20   23.00
  -4  12   0   24.00   28.10
   5 -12   0   42.70   21.40
   5 -12   0   16.50   30.90
   5 -12   0   41.90   20.40
  -5 -12   0   15.90   22.30
  -5 -12   0  -23.30   19.10
   5 -12   0   -6.80   16.50
  -5 -12   0    4.60   22.70
   5 -12   0   95.79   30.60
  -5 -12   0  -13.70   23.60
   5 -12   0    0.80   12.10
   5 -12   0   10.00   21.70
   5 -12   0   10.70   12.20
  -5 -12   0   11.10   16.10
  -5  12   0    5.60   25.00
   5  12   0  -31.40   22.70
  -5  12   0  -22.30   31.70
   5  12   0  -42.60   30.30
   5  12   0   36.50   34.10
   5  12   0   37.00   24.70
   5  12   0    2.20   28.70
  -5  12   0    6.80   22.10
   5  12   0  131.69   83.39
  -5  12   0  -23.60   28.00
  -6 -12   0   -8.70   21.00
   6 -12   0   -4.90   16.70
   6 -12   0   33.40   35.80
  -6 -12   0    0.90   19.10
   6 -12   0  -16.70   16.30
  -6 -12   0    3.10   38.00
   6 -12   0   10.10   36.20
  -6 -12   0   15.90   17.80
  -6 -12   0   20.80   20.90
   6 -12   0   31.20   21.30
   6 -12   0    8.30   16.40
  -6  12   0   27.30   30.80
  -6  12   0   13.20   37.00
  -6  12   0  -14.30   26.50
  -6  12   0  -34.80    9.50
   6  12   0    1.80   22.40
  -6  12   0    0.30   15.90
   6  12   0   22.90   25.90
   6  12   0  -19.10   29.40
  -6  12   0    3.50   31.20
   6  12   0   -4.00   27.10
   6  12   0  -13.50   30.20
   7 -12   0   -0.20   30.30
   7 -12   0   30.80   20.10
  -7 -12   0    1.60   20.10
  -7 -12   0   18.40   26.80
   7 -12   0   31.00   20.60
  -7 -12   0   44.70   19.30
   7 -12   0   42.70   21.80
   7 -12   0   57.89   24.00
  -7 -12   0    2.40   23.20
  -7 -12   0   14.70   43.00
  -7 -12   0   13.40   20.50
   7 -12   0   33.10   22.80
   7 -12   0   37.80   21.30
  -7  12   0   25.90   40.80
   7  12   0   21.70   32.60
  -7  12   0   29.70   16.70
  -7  12   0    7.20   35.20
  -7  12   0   34.20   34.10
   7  12   0   25.80   33.30
   7  12   0   37.30   29.40
   7  12   0   26.30   33.40
  -7  12   0   28.00   20.00
  -7  12   0   37.40   32.70
  -8 -12   0   12.80   15.40
  -8 -12   0   -0.80   20.80
  -8 -12   0  -11.60   36.20
  -8 -12   0    7.80   24.00
   8 -12   0   56.19   22.40
   8 -12   0    4.30   20.30
   8 -12   0   34.70   32.20
   8 -12   0   17.90   20.20
   8 -12   0   -0.40   20.40
   8 -12   0   11.10   22.50
  -8 -12   0   -8.70   23.90
   8 -12   0   48.60   17.50
  -8 -12   0   14.90   24.40
   8  12   0  -70.29   98.79
   8  12   0    4.70   20.70
  -8  12   0    9.60   23.60
   8  12   0    5.30   19.40
  -8  12   0   33.10   18.00
  -8  12   0  -11.10   28.90
   8  12   0   29.10   36.40
   8  12   0    9.20   32.50
  -8  12   0  -29.30   29.10
   8  12   0   -4.10   37.40
  -8  12   0   43.60   40.90
  -9 -12   0   27.80   22.30
   9 -12   0   35.40   18.70
   9 -12   0   36.10   25.60
  -9 -12   0  -15.40   16.10
   9 -12   0    2.30   10.20
  -9 -12   0   30.80   50.59
   9 -12   0  106.09   42.90
   9 -12   0   -1.90   22.30
  -9 -12   0    5.80   18.60
   9  12   0   17.60   27.90
   9  12   0    0.00   20.60
  -9  12   0   32.00   36.00
  -9  12   0   16.40   27.50
   9  12   0   34.90   33.10
  -9  12   0   69.19   36.00
  -9  12   0   13.40   16.00
   9  12   0    7.40   31.90
  -9  12   0  -15.80   34.00
  10 -12   0   57.69   28.90
  10 -12   0   -4.80   29.70
 -10 -12   0   51.59   50.19
 -10 -12   0   39.60   18.60
  10 -12   0   32.50   24.70
 -10 -12   0   80.59   38.90
 -10 -12   0   33.80   26.70
 -10 -12   0   68.39   33.90
  10 -12   0   71.39   25.80
 -10 -12   0   57.39   23.80
  10 -12   0   28.90   20.60
  10  12   0   78.29   22.90
 -10  12   0   11.00   24.60
 -10  12   0   76.49   49.10
 -10  12   0  103.99   46.10
 -10  12   0   84.29   37.70
 -10  12   0   95.19   31.60
  10  12   0   17.20   29.00
  10  12   0   97.19   44.80
  10  12   0   74.39   34.80
 -11 -12   0   14.80   32.60
  11 -12   0   67.89   29.60
  11 -12   0   11.60   24.30
  11 -12   0   32.40   26.50
  11 -12   0  -54.89   30.40
 -11 -12   0    8.90   25.80
 -11 -12   0   38.90   28.70
 -11 -12   0   89.19   50.29
  11  12   0   69.19   40.80
  11  12   0  353.96  143.89
 -11  12   0    8.60   25.30
  11  12   0   13.00   32.70
  11  12   0   38.90   38.70
 -11  12   0  145.49   42.70
 -11  12   0   -6.80   33.30
 -11  12   0   86.29   32.80
  11  12   0    0.90   26.50
  12 -12   0  -55.99   38.20
  12 -12   0  -18.80   22.30
 -12 -12   0  103.09   36.80
 -12 -12   0   27.60   18.20
  12 -12   0   56.89   31.00
  12 -12   0   66.49   29.40
 -12 -12   0  -28.50   39.10
 -12 -12   0   55.09   26.80
 -12 -12   0   49.40   38.00
  12  12   0  -17.30   44.60
 -12  12   0  -14.30   34.30
 -12  12   0  -26.50   30.60
  12  12   0  -12.50   29.80
  12  12   0   21.60   23.80
  12  12   0   94.29  141.99
 -12  12   0   32.60   36.20
 -12  12   0   21.20   35.50
  12  12   0   16.30   41.20
 -13 -12   0  -47.20   40.20
  13 -12   0    3.10   26.90
 -13 -12   0   17.90   27.60
  13 -12   0  -28.20   23.80
  13 -12   0    0.10   24.10
  13  12   0   22.10   56.19
   0 -13   0   23.40   17.20
   0 -13   0   21.00   20.10
   0 -13   0   12.10   21.20
   0 -13   0   18.90   24.20
   0 -13   0   39.30   35.20
   0  13   0   30.40   14.10
   0  13   0   26.40   17.10
   0  13   0   24.20   28.10
   0  13   0   53.29   39.10
   0  13   0   55.89   38.70
   0  13   0   18.80   27.00
   0  13   0   44.30   28.30
  -1 -13   0  129.79   34.70
   1 -13   0   71.29   25.70
  -1 -13   0   33.40   23.20
   1 -13   0   53.49   22.10
   1 -13   0   79.39   23.60
  -1 -13   0   58.39   23.00
   1 -13   0   83.29   28.80
   1 -13   0   17.30   36.60
   1 -13   0   92.59   28.20
  -1 -13   0   51.49   20.80
  -1 -13   0  113.09   50.99
  -1  13   0   69.59   21.60
  -1  13   0   44.60   30.40
  -1  13   0   10.20   67.89
   1  13   0  124.69   46.40
   1  13   0  245.28   80.29
  -1  13   0   51.79   43.10
  -1  13   0   79.99   22.30
  -1  13   0   56.79   33.30
  -1  13   0  114.29   46.00
   1  13   0   90.19   18.60
   1  13   0   53.99   27.60
  -1  13   0   69.49   35.40
   1  13   0   12.00   29.30
   1  13   0   89.09   41.40
   1  13   0   81.59   33.50
   2 -13   0   33.40   41.40
  -2 -13   0   49.50   46.90
   2 -13   0   12.70   21.40
   2 -13   0  -10.00   20.00
   2 -13   0   -1.50   16.80
   2 -13   0    2.30   19.10
  -2 -13   0    3.70   18.40
  -2 -13   0   15.70   18.90
   2 -13   0   12.80   17.20
  -2 -13   0   39.60   22.60
  -2 -13   0    2.20   20.60
   2  13   0   -7.90   18.20
   2  13   0  -40.10   64.89
  -2  13   0    4.60   22.20
  -2  13   0  -53.39   26.40
   2  13   0    7.00   31.20
  -2  13   0   88.19   64.79
   2  13   0    9.50    9.80
  -2  13   0   59.59   28.20
   2  13   0   31.20   29.90
  -2  13   0   13.40   29.90
  -2  13   0   44.00   42.60
   2  13   0  -29.20   32.40
   2  13   0  -23.50   24.20
  -2  13   0   -1.60   14.00
  -3 -13   0   81.19   27.60
  -3 -13   0   48.30   23.60
   3 -13   0   93.89   27.80
   3 -13   0   45.80   20.40
   3 -13   0   72.89   23.20
   3 -13   0   65.99   24.50
   3 -13   0   68.59   40.70
   3 -13   0   65.59   23.20
  -3 -13   0  100.99   44.20
   3 -13   0   49.50   23.00
  -3 -13   0   55.39   26.00
  -3  13   0   54.79   18.00
   3  13   0   34.40   26.90
  -3  13   0   37.60   23.30
   3  13   0   72.79   35.40
   3  13   0  110.99   82.79
  -3  13   0   60.59   35.30
   3  13   0   96.59   45.80
   3  13   0   73.09   36.30
  -3  13   0   74.39   45.80
  -3  13   0   18.30   40.00
   3  13   0   42.90   11.90
   3  13   0   34.10   21.40
  -3  13   0  -10.90   21.40
  -4 -13   0   -5.80   18.30
   4 -13   0   24.90   18.40
   4 -13   0   -1.50   15.10
   4 -13   0   12.70   17.10
   4 -13   0   31.40   24.80
   4 -13   0   34.50   42.40
   4 -13   0   20.70   21.30
  -4 -13   0    0.10   35.00
  -4 -13   0   23.30   16.20
  -4 -13   0    6.30   22.80
   4 -13   0   29.70   24.90
  -4 -13   0   13.70   20.70
  -4  13   0   21.70   15.30
  -4  13   0   81.59   22.00
   4  13   0    7.80   20.90
  -4  13   0   -3.90   34.10
   4  13   0   14.10   24.60
  -4  13   0    5.20   24.10
   4  13   0    8.10   30.40
   4  13   0   10.90   34.20
   4  13   0   10.40   30.90
   4  13   0   70.09   86.19
  -4  13   0   53.59   41.60
  -4  13   0   78.29   36.80
   4  13   0   20.20    7.40
  -4  13   0   28.00   33.40
   5 -13   0   33.80   22.60
   5 -13   0   49.70   16.30
   5 -13   0   -4.00   17.00
  -5 -13   0   -0.40   33.80
   5 -13   0   17.50   37.20
  -5 -13   0  -11.50   17.90
  -5 -13   0  -16.00   19.10
  -5 -13   0    6.40   16.90
   5 -13   0    2.20   18.70
   5 -13   0   26.80   23.10
  -5 -13   0    3.70   20.10
  -5  13   0   41.70   25.70
   5  13   0   17.90   22.70
  -5  13   0   76.59   39.60
   5  13   0   49.80   41.40
  -5  13   0  -20.00   28.60
   5  13   0   23.20   28.80
  -5  13   0   36.60   33.10
   5  13   0   33.20   33.70
  -5  13   0  -39.60   35.90
  -5  13   0   19.30   16.10
   5  13   0   63.19   32.90
   6 -13   0   60.39   21.90
  -6 -13   0   21.50   23.40
  -6 -13   0   81.99   31.60
  -6 -13   0   52.89   21.90
  -6 -13   0   81.49   44.30
   6 -13   0   39.30   22.70
   6 -13   0   48.50   25.70
   6 -13   0   35.90   25.50
  -6 -13   0   52.39   27.50
   6 -13   0   38.70   24.20
   6 -13   0   24.50   36.70
  -6  13   0  128.29   45.90
   6  13   0   38.70   35.50
  -6  13   0  112.49   40.70
   6  13   0   72.79   41.10
  -6  13   0   41.50   23.80
   6  13   0  204.28  118.39
   6  13   0   47.20   26.30
  -6  13   0   69.89   46.50
  -6  13   0   29.40   30.70
   6  13   0   41.30   31.90
   6  13   0   65.79   30.90
  -6  13   0   26.70   16.50
  -7 -13   0   49.20   41.00
   7 -13   0  -23.10   13.50
  -7 -13   0   15.50   16.70
   7 -13   0    2.60   19.90
   7 -13   0   16.80   24.10
   7 -13   0   -6.30   20.70
  -7 -13   0  -37.80   16.80
  -7 -13   0    5.80   19.40
   7 -13   0   25.50   39.30
   7 -13   0    7.20   19.20
  -7 -13   0  -11.90   23.70
   7  13   0   -7.30   21.90
  -7  13   0  -38.80   38.90
  -7  13   0    9.60   37.80
   7  13   0   -0.90   26.20
  -7  13   0   37.70   20.00
   7  13   0  -24.10   30.10
  -7  13   0   87.69   42.10
  -7  13   0   -3.20   24.80
  -7  13   0   14.90   18.90
   7  13   0   43.20   41.80
   7  13   0    5.80   32.20
   8 -13   0   -7.30   22.10
   8 -13   0   12.60   24.10
  -8 -13   0   39.70   25.80
   8 -13   0    0.50   23.10
  -8 -13   0   -5.30   16.20
  -8 -13   0    7.10   25.20
   8 -13   0   13.00   18.30
   8 -13   0   19.70   23.40
   8 -13   0   18.40   33.50
  -8 -13   0   15.50   21.90
  -8 -13   0   68.29   43.90
  -8  13   0   -5.10   22.40
  -8  13   0   30.30   18.70
   8  13   0    1.90   26.00
  -8  13   0  110.69   63.79
   8  13   0   83.39   45.40
  -8  13   0   52.19   39.60
   8  13   0   -3.10   22.60
   8  13   0   10.70   31.30
  -9 -13   0   72.29   31.70
   9 -13   0   86.99   27.50
  -9 -13   0   51.29   44.70
   9 -13   0   62.29   30.50
  -9 -13   0   70.69   27.60
   9 -13   0   -4.70   12.00
   9 -13   0   14.30   22.30
   9 -13   0   16.50   22.10
  -9 -13   0   16.60   28.50
  -9 -13   0   55.69   28.60
  -9 -13   0   34.90   18.80
   9 -13   0   11.70   36.40
   9  13   0   74.79   45.90
  -9  13   0   25.80   19.20
   9  13   0   72.79   43.70
  -9  13   0   47.30   44.60
  -9  13   0   40.60   40.70
  -9  13   0   91.09   43.20
   9  13   0   24.00   33.20
  -9  13   0   -4.90   39.00
  10 -13   0   12.50   23.20
 -10 -13   0    9.70   23.90
  10 -13   0  -11.60   27.90
 -10 -13   0    0.80   40.80
  10 -13   0   -7.50   17.60
  10 -13   0   18.80   25.70
 -10 -13   0    1.90   27.30
 -10 -13   0   30.00   18.10
 -10 -13   0   52.99   33.70
 -10  13   0  -11.60   22.40
 -10  13   0    1.10   34.40
  10  13   0   84.79   42.90
  10  13   0   28.80   31.80
 -10  13   0   -7.50   29.10
  10  13   0  -38.00   30.30
 -10  13   0   -7.80   39.40
  10  13   0  -38.50   15.70
 -11 -13   0    5.10   21.20
 -11 -13   0   43.70   31.10
  11 -13   0  -18.10   27.60
  11 -13   0   20.00   26.40
  11 -13   0    0.10   21.40
 -11 -13   0  -26.40   28.00
 -11 -13   0    7.00   44.40
  11 -13   0   22.50   24.80
 -11 -13   0   30.00   24.30
 -11  13   0   32.00   33.10
  11  13   0   75.09   43.60
 -11  13   0   24.30   25.10
  11  13   0  -78.39  120.29
  11  13   0   58.59   38.10
 -11  13   0   -5.90   37.10
  11  13   0   61.69   46.70
 -12 -13   0   38.20   30.10
 -12 -13   0   -8.30   44.30
 -12 -13   0   18.90   24.30
  12 -13   0  -30.70   22.70
  12 -13   0  -20.70   23.60
  12 -13   0   -6.30   26.60
 -12 -13   0   -8.20   34.40
 -12 -13   0   72.49   34.00
  12  13   0    7.10   37.40
 -12  13   0   49.99   36.90
 -12  13   0   12.40   37.60
  12  13   0  -43.10   40.50
 -12  13   0  -44.20   21.20
  12  13   0   16.30   36.00
  12  13   0   32.40   27.40
 -12  13   0   49.70   38.60
   0 -14   0   42.80   23.50
   0 -14   0   25.50   21.30
   0 -14   0   27.40   20.60
   0 -14   0   43.80   45.30
   0 -14   0   -0.40   14.80
   0  14   0   31.50   32.00
   0  14   0   17.80   23.20
   0  14   0   14.10   15.20
   0  14   0  -43.30   29.30
   0  14   0   69.19   42.20
   0  14   0   10.20   25.60
   1 -14   0   50.89   23.90
  -1 -14   0   44.00   26.90
  -1 -14   0   35.00   20.00
  -1 -14   0   25.70   37.70
   1 -14   0   56.99   26.50
   1 -14   0   21.60   19.30
   1 -14   0   21.90   38.30
  -1 -14   0   37.20   22.60
  -1 -14   0   33.70   22.60
   1 -14   0   27.50   18.70
   1  14   0   31.10   40.20
  -1  14   0   20.10   36.80
  -1  14   0   42.90   30.10
   1  14   0   21.70   23.20
  -1  14   0   43.60   29.40
   1  14   0   51.89   27.60
   1  14   0   13.10   28.20
  -1  14   0   78.99   44.00
  -1  14   0   63.09   76.19
   1  14   0   76.49   44.70
  -1  14   0   47.60   28.20
  -1  14   0   66.19   22.90
   2 -14   0   20.00   42.30
   2 -14   0   78.99   26.40
  -2 -14   0   86.39   28.10
  -2 -14   0   55.29   27.40
   2 -14   0   76.09   22.00
  -2 -14   0   65.19   25.40
   2 -14   0   51.69   25.30
   2 -14   0   97.59   30.30
  -2 -14   0   75.79   48.00
  -2 -14   0   75.09   23.20
   2 -14   0   84.09   27.50
  -2  14   0  113.49   34.50
   2  14   0  121.19   51.39
  -2  14   0   60.09   30.70
  -2  14   0  118.59   33.20
  -2  14   0  129.69   24.20
  -2  14   0   89.59   43.30
  -2  14   0   69.59   46.10
   2  14   0   15.90   30.30
   2  14   0   78.09   17.20
  -2  14   0   59.09   76.19
   2  14   0   53.39   36.70
   2  14   0   44.50   23.30
   2  14   0   39.60   34.30
   3 -14   0   72.79   27.00
  -3 -14   0    2.80   45.10
  -3 -14   0   43.70   26.30
   3 -14   0   69.89   25.30
   3 -14   0   64.19   28.10
   3 -14   0   40.60   22.20
  -3 -14   0   45.20   28.70
   3 -14   0   72.89   45.50
  -3 -14   0   56.89   24.70
   3 -14   0   76.29   29.40
   3 -14   0   43.70   22.50
  -3  14   0   46.30   32.70
   3  14   0   78.69   40.90
  -3  14   0   69.69   48.60
  -3  14   0   24.80   38.70
   3  14   0   72.69   36.50
  -3  14   0   86.59   29.60
   3  14   0   98.09   36.40
  -3  14   0   64.79   29.30
   3  14   0   30.90   25.60
   3  14   0   74.69   13.70
   3  14   0   72.69  100.99
   3  14   0   68.59   42.00
  -3  14   0   45.60   21.40
  -4 -14   0   83.99   33.00
   4 -14   0   71.89   27.80
   4 -14   0   45.40   24.40
   4 -14   0   67.59   24.80
  -4 -14   0  107.99   57.09
   4 -14   0   36.20   20.70
   4 -14   0   56.39   39.80
   4 -14   0   25.70   22.00
   4 -14   0   59.69   26.50
  -4 -14   0   55.79   27.80
  -4 -14   0   81.69   28.40
  -4  14   0  121.59   40.60
  -4  14   0   55.99   18.80
   4  14   0   42.70   32.20
   4  14   0   50.49   10.70
   4  14   0   54.29   39.20
  -4  14   0   45.90   31.00
  -4  14   0   66.19   44.40
   4  14   0   58.89   45.90
   4  14   0  235.08   84.29
   4  14   0   17.80   24.50
  -4  14   0  -24.50   34.20
  -4  14   0   73.19   25.00
   4  14   0   27.00   34.80
   5 -14   0   69.69   21.10
   5 -14   0   45.60   23.90
  -5 -14   0   38.10   19.30
  -5 -14   0   16.90   23.30
  -5 -14   0   30.30   22.30
   5 -14   0   30.00   21.20
  -5 -14   0   52.49   40.00
   5 -14   0   32.70   23.10
  -5 -14   0   50.79   28.40
   5 -14   0   20.30   35.60
  -5  14   0   12.90   25.40
  -5  14   0   -6.40   40.50
   5  14   0   19.30   29.70
  -5  14   0   57.29   36.30
  -5  14   0   21.80   26.70
   5  14   0   25.60   38.60
  -5  14   0   11.70   18.40
   5  14   0   88.39   50.09
   5  14   0   84.29  103.29
   5  14   0   13.80   25.00
   5  14   0   83.49   42.40
   6 -14   0   47.60   23.80
  -6 -14   0   85.99   31.30
   6 -14   0  100.09   34.70
   6 -14   0   67.39   49.50
  -6 -14   0   87.19   25.70
  -6 -14   0   73.09   57.39
  -6 -14   0   56.19   31.20
   6 -14   0   84.59   27.40
   6 -14   0   55.09   22.80
   6  14   0   25.20   31.20
   6  14   0   29.00   32.60
   6  14   0   24.10   41.10
  -6  14   0   72.69   39.40
  -6  14   0   52.99   28.20
  -6  14   0   55.09   55.69
   6  14   0   53.49   40.50
  -6  14   0  107.39   43.50
   6  14   0   55.59   27.60
   7 -14   0   -7.60   19.80
  -7 -14   0   -1.50   24.00
  -7 -14   0   30.00   23.00
   7 -14   0  -25.60   25.60
  -7 -14   0   10.40   21.10
   7 -14   0   22.90   19.20
  -7 -14   0   14.30   25.70
   7 -14   0   29.40   25.10
  -7 -14   0  129.59   50.49
   7 -14   0   -5.10   34.30
  -7  14   0   51.39   53.09
   7  14   0   23.60   34.30
  -7  14   0   13.30   31.90
  -7  14   0  114.69   42.60
   7  14   0   -3.10   33.20
  -7  14   0    0.70   18.10
   7  14   0   90.19   32.30
   7  14   0  -17.30   32.20
  -7  14   0   12.30   38.60
   7  14   0   -3.70   26.20
   8 -14   0  -22.80   18.80
  -8 -14   0    6.20   42.80
   8 -14   0  -36.60   24.00
   8 -14   0    4.70   21.50
  -8 -14   0   17.60   26.80
   8 -14   0   24.10   27.80
   8 -14   0   18.70   36.60
   8 -14   0   -8.60   17.90
  -8 -14   0   41.60   27.20
  -8 -14   0   30.70   26.80
  -8 -14   0   23.10   19.40
   8  14   0    9.80   30.40
  -8  14   0   32.80   45.20
  -8  14   0   51.59   24.90
   8  14   0   62.09   31.40
  -8  14   0  140.49   52.59
  -8  14   0   23.20   42.90
   8  14   0  -29.20   43.30
  -8  14   0  -21.00   26.10
   8  14   0   18.70   24.00
   8  14   0  -46.40   29.30
   9 -14   0   83.79   29.00
   9 -14   0  118.09   36.30
   9 -14   0  124.69   38.40
  -9 -14   0   40.70   33.50
  -9 -14   0   86.69   44.30
  -9 -14   0   81.29   32.80
  -9 -14   0  160.68   42.50
  -9 -14   0  119.79   32.70
   9  14   0  146.49   55.69
  -9  14   0   85.99   45.70
  -9  14   0  155.18   55.59
   9  14   0   75.79   40.60
   9  14   0   88.19   30.90
   9  14   0  150.38   59.59
  -9  14   0  108.89   45.60
  10 -14   0    0.00   23.50
 -10 -14   0   71.79   40.00
  10 -14   0   -9.80   16.40
 -10 -14   0   15.70   24.20
  10 -14   0   18.00   22.90
  10 -14   0    4.20   28.80
 -10 -14   0   -0.90   16.60
 -10 -14   0   20.40   25.10
 -10 -14   0    6.40   28.20
  10  14   0   87.19   39.60
 -10  14   0  -15.10   30.80
 -10  14   0    3.40   39.50
 -10  14   0   22.30   42.20
  10  14   0  -10.10   40.00
 -10  14   0   33.30   30.20
  10  14   0   -7.00   22.60
  10  14   0  -32.40   34.00
  11 -14   0   -7.70   25.30
  11 -14   0  -50.79   47.60
 -11 -14   0   69.99   46.80
 -11 -14   0   80.59   36.70
 -11 -14   0   55.09   33.20
  11 -14   0   41.30   27.30
 -11 -14   0   23.70   22.90
  11 -14   0   -7.00   23.90
 -11 -14   0   19.10   34.50
 -11  14   0   42.80   42.00
  11  14   0  -11.20   40.70
 -11  14   0   18.30   39.50
  11  14   0  346.97  163.08
 -11  14   0   90.99   40.90
  11  14   0   70.49   39.90
 -11  14   0   32.30   34.70
  11  14   0   56.29   44.50
   0 -15   0    6.80   17.40
   0 -15   0   19.90   24.00
   0 -15   0   20.30   21.50
   0 -15   0   25.80   41.30
   0 -15   0   14.60   19.30
   0  15   0   -8.40   27.00
   0  15   0    6.30   18.10
   0  15   0  -34.00   32.10
   0  15   0  115.79   82.69
   0  15   0  -15.90   24.00
   0  15   0   65.89   44.30
  -1 -15   0    7.60   21.70
   1 -15   0  -41.60   31.80
   1 -15   0    4.30   22.20
  -1 -15   0    2.00   16.30
  -1 -15   0   -6.20   14.60
  -1 -15   0   16.30   31.60
  -1 -15   0    4.40   20.50
   1 -15   0  -13.50   15.20
   1 -15   0   38.10   20.70
   1 -15   0   26.30   19.10
   1 -15   0  -11.90   18.00
   1  15   0  -29.00   25.10
   1  15   0  -19.40   13.90
   1  15   0  -15.00   36.30
  -1  15   0   10.90   26.30
  -1  15   0  -59.99   31.90
  -1  15   0    7.30   25.30
   1  15   0    2.30   27.30
   1  15   0   13.60   13.80
   1  15   0   -6.70   36.00
  -1  15   0   25.70   36.80
   2 -15   0  -18.80   12.90
   2 -15   0   -7.80   19.90
  -2 -15   0   28.20   24.50
   2 -15   0    8.80   16.50
  -2 -15   0   31.00   41.70
   2 -15   0   -0.80   17.50
  -2 -15   0   21.10   21.10
   2 -15   0   79.49   42.10
  -2 -15   0    1.50   16.10
  -2 -15   0   -6.60   20.80
   2  15   0    0.30   28.40
  -2  15   0  -28.20   18.80
  -2  15   0   31.80   41.90
  -2  15   0   47.70   30.30
   2  15   0    9.00   28.30
   2  15   0  -24.80   34.00
   2  15   0   78.99   37.80
   2  15   0    4.30   12.10
  -2  15   0   34.10   24.00
  -2  15   0   10.10   36.60
   2  15   0   22.60   21.90
  -3 -15   0    7.70   15.20
   3 -15   0   59.19   25.70
  -3 -15   0   60.29   26.00
  -3 -15   0   27.50   23.50
   3 -15   0   16.10   40.20
   3 -15   0  -14.10   15.50
   3 -15   0   63.29   26.50
   3 -15   0   -1.10   20.20
  -3 -15   0  -17.80   41.70
   3 -15   0   24.10   25.90
  -3 -15   0   31.20   23.90
   3 -15   0   50.99   20.80
  -3  15   0   87.89   47.40
   3  15   0   11.10   26.80
  -3  15   0    2.40   29.40
   3  15   0   29.60   33.50
   3  15   0   37.10   11.60
  -3  15   0   28.90   24.40
   3  15   0   39.30   34.10
  -3  15   0   13.40   37.80
  -3  15   0   43.90   26.60
   3  15   0   79.69  102.59
   3  15   0  -19.40   18.60
   3  15   0   42.70   43.00
   4 -15   0   34.20   22.50
   4 -15   0   -4.60   17.40
   4 -15   0   85.99   47.50
   4 -15   0   75.39   49.40
  -4 -15   0  -33.30   35.10
   4 -15   0  -11.60   18.70
  -4 -15   0    4.40   19.20
   4 -15   0    5.20   23.90
   4 -15   0    1.00   17.60
  -4  15   0  -21.20   32.10
   4  15   0   29.30   42.90
   4  15   0   34.30   99.09
   4  15   0  -33.70   29.50
   4  15   0   15.50   36.80
   4  15   0  -10.10   20.60
  -4  15   0   36.80   21.30
  -4  15   0  -24.20   17.90
   5 -15   0  176.48   33.00
   5 -15   0  138.59   36.50
  -5 -15   0  133.69   36.30
   5 -15   0  212.88   39.10
   5 -15   0  252.97   44.00
  -5 -15   0  222.08   50.69
  -5 -15   0  175.18   41.00
   5 -15   0  185.38   59.39
  -5 -15   0  250.47   83.99
  -5  15   0  228.48   46.80
  -5  15   0  173.68   62.39
   5  15   0  135.89   35.70
   5  15   0  122.49   51.29
  -5  15   0  133.49   49.90
  -5  15   0  184.88   52.59
   5  15   0  235.08  138.89
   5  15   0  174.98   60.99
   5  15   0  195.88   49.30
   5  15   0  114.39   50.49
  -6 -15   0    6.90   23.70
   6 -15   0   28.20   25.10
  -6 -15   0   30.50   49.00
   6 -15   0   63.49   28.60
   6 -15   0  -12.30   31.90
  -6 -15   0   66.99   33.10
  -6 -15   0   -4.60   17.90
   6 -15   0   80.79   23.40
   6 -15   0    5.30   22.00
  -6 -15   0   21.50   24.30
  -6  15   0   66.29   49.30
  -6  15   0   64.29   28.80
   6  15   0   80.39   50.79
   6  15   0  -46.30  120.49
  -6  15   0   76.49   58.19
  -6  15   0   23.40   30.20
   6  15   0   14.70   30.20
   6  15   0   -6.60   33.40
   6  15   0   61.19   42.00
   6  15   0   -8.70   26.90
  -7 -15   0  105.89   53.09
   7 -15   0   18.60   42.30
  -7 -15   0   28.40   16.60
  -7 -15   0  -10.90   20.60
  -7 -15   0    8.50   22.00
   7 -15   0   32.50   25.00
  -7 -15   0   39.40   29.80
   7 -15   0   42.00   21.30
   7 -15   0   45.00   26.30
   7 -15   0   24.30   25.10
   7  15   0   28.80  115.19
   7  15   0   65.99   43.70
   7  15   0   36.50   45.50
   7  15   0   87.49   30.50
  -7  15   0    4.30   41.00
  -7  15   0  -62.79   44.10
  -7  15   0   50.29   26.20
  -7  15   0   22.60   34.70
   7  15   0   28.70   30.20
   8 -15   0   11.70   26.60
   8 -15   0   -3.20   19.10
  -8 -15   0   36.30   23.90
   8 -15   0   -3.30   21.50
  -8 -15   0  -26.90   24.10
  -8 -15   0   66.99   49.40
  -8 -15   0  -40.20   20.70
   8 -15   0    9.20   21.70
  -8  15   0  -13.10   30.50
   8  15   0   57.79   48.40
   8  15   0   32.90   48.30
   8  15   0  -21.20   43.50
  -8  15   0    9.80   39.50
  -8  15   0   18.70   21.50
   8  15   0  -24.70   25.20
  -8  15   0   11.40   33.60
   9 -15   0  -17.30   19.40
   9 -15   0    1.50   32.70
  -9 -15   0   36.80   33.30
  -9 -15   0   -4.10   16.10
   9 -15   0  -28.00   13.40
  -9 -15   0  -13.20   24.40
   9 -15   0   19.50   24.70
  -9 -15   0   -4.70   26.80
  -9 -15   0  124.79   60.89
   9 -15   0    2.60   23.50
   9  15   0   16.30   41.80
  -9  15   0   25.50   40.20
   9  15   0  -16.10   27.90
   9  15   0   14.50   42.00
  -9  15   0   15.50   33.20
  -9  15   0  -31.90   39.00
   9  15   0   60.99   43.50
  10 -15   0   -3.10   26.60
 -10 -15   0    5.80   21.00
  10 -15   0   -6.70   26.20
  10 -15   0    5.20   21.50
 -10 -15   0   -0.60   30.20
 -10 -15   0   32.70   32.70
  10 -15   0   23.40   44.60
 -10 -15   0  -35.80   46.90
 -10 -15   0  -10.20   27.90
 -10  15   0   63.59   30.20
 -10  15   0   24.20   37.30
  10  15   0  -79.89  143.19
  10  15   0   82.29   46.60
  10  15   0  -25.30   39.70
 -10  15   0   74.19   48.30
 -10  15   0   44.80   50.39
  10  15   0   79.79   53.19
  10  15   0  -11.70   19.50
   0 -16   0   71.79   27.50
   0 -16   0  159.58   63.89
   0 -16   0   94.49   29.00
   0 -16   0  119.19   36.00
   0  16   0  117.39   55.09
   0  16   0   33.60   28.10
   0  16   0   95.99   56.59
   0  16   0  112.19   41.80
   0  16   0  236.48  105.79
  -1 -16   0   67.59   24.80
   1 -16   0  100.69   50.79
   1 -16   0  119.29   29.50
  -1 -16   0   98.29   54.29
  -1 -16   0  123.19   32.50
   1 -16   0  109.09   32.70
  -1 -16   0  155.78   43.00
   1 -16   0  186.58   37.60
   1 -16   0  137.49   31.30
   1  16   0   91.39   53.89
   1  16   0   54.19   29.40
   1  16   0   90.09   49.80
   1  16   0   80.89   19.30
  -1  16   0   -8.30   57.69
  -1  16   0  161.98   58.19
  -1  16   0   51.69   44.00
  -1  16   0  113.29   40.40
   1  16   0   70.29   35.90
  -1  16   0  117.89   43.70
   1  16   0   71.69   38.70
   2 -16   0  104.79   47.00
   2 -16   0   54.79   25.20
   2 -16   0   23.20   23.00
  -2 -16   0   41.70   21.30
  -2 -16   0   38.20   23.60
  -2 -16   0   48.00   31.40
  -2 -16   0   21.10   21.90
   2 -16   0   54.79   28.00
   2 -16   0   29.90   23.80
  -2 -16   0   10.90   35.70
   2  16   0   36.70   33.30
   2  16   0   80.69   41.60
  -2  16   0   66.19   49.70
  -2  16   0   43.50   31.90
   2  16   0   50.79   37.10
  -2  16   0   -3.60   35.30
   2  16   0   -1.20   14.50
  -2  16   0   74.89   35.60
  -2  16   0   91.09   33.70
   2  16   0   59.29   42.30
  -3 -16   0  129.99   65.09
   3 -16   0   37.30   23.10
   3 -16   0   51.39   23.20
  -3 -16   0   32.00   25.50
   3 -16   0   58.19   55.09
  -3 -16   0   29.80   23.30
  -3 -16   0   77.39   29.50
   3 -16   0   94.19   34.40
   3 -16   0    7.40   20.50
   3 -16   0   13.50   27.60
   3 -16   0   49.99   26.50
  -3 -16   0    5.90   22.60
   3  16   0   39.30   14.30
  -3  16   0   -8.10   40.60
   3  16   0   72.79   53.49
  -3  16   0  113.69   30.30
  -3  16   0   -7.60   24.10
   3  16   0   87.39   40.70
  -3  16   0   84.29   50.79
  -3  16   0   54.29   33.80
   3  16   0   13.30   30.00
   3  16   0   37.40   23.20
   3  16   0  109.59  111.79
   3  16   0  101.79   45.50
  -4 -16   0   17.80   22.60
  -4 -16   0  -21.70   21.90
   4 -16   0   71.89   26.30
   4 -16   0   63.19   29.20
   4 -16   0   34.40   17.80
  -4 -16   0   32.50   21.60
  -4 -16   0   13.40   46.90
  -4 -16   0   31.40   22.30
   4 -16   0   36.60   42.90
   4  16   0   41.70   35.90
   4  16   0   82.59   72.29
  -4  16   0   14.90   43.20
  -4  16   0   53.29   45.00
  -4  16   0   37.60   24.50
  -4  16   0   15.60   25.10
   4  16   0   42.50   25.40
   4  16   0    2.10  115.09
   4  16   0   67.29   39.00
   4  16   0   27.60   37.80
  -4  16   0    4.50   27.60
   5 -16   0  -23.40   19.40
  -5 -16   0  -38.20   22.30
  -5 -16   0   27.20   24.80
   5 -16   0    3.40   20.00
  -5 -16   0    5.50   21.10
  -5 -16   0    5.20   43.90
   5 -16   0   23.70   22.30
   5 -16   0   19.10   39.80
   5 -16   0   18.20   23.70
  -5  16   0   16.80   26.20
  -5  16   0   43.20   49.99
   5  16   0   76.49   54.49
   5  16   0   33.10   37.90
   5  16   0  -11.20   28.30
  -5  16   0   38.30   24.30
   5  16   0   19.50   32.80
   5  16   0   42.90   29.10
  -5  16   0   20.70   36.50
   6 -16   0   46.00   22.10
   6 -16   0   -6.20   41.30
   6 -16   0  -37.10   20.40
   6 -16   0   25.40   26.10
  -6 -16   0   27.40   28.30
   6 -16   0   34.60   24.70
  -6 -16   0   22.70   25.20
  -6 -16   0   30.70   46.90
  -6 -16   0  -24.00   14.90
   6  16   0   34.70   28.80
   6  16   0  -26.60   37.40
  -6  16   0  -54.49   25.70
   6  16   0   24.80   34.00
   6  16   0   12.40   35.20
  -6  16   0  -27.10   23.30
   6  16   0   66.49   41.60
  -6  16   0   -6.00   47.40
  -6  16   0  -19.10   40.30
  -7 -16   0   -5.40   27.80
  -7 -16   0  -13.40   24.30
  -7 -16   0    6.20   50.49
   7 -16   0   32.50   19.40
   7 -16   0    4.70   25.50
  -7 -16   0   -5.60   18.40
  -7 -16   0   -4.30   21.30
   7 -16   0  -20.70   21.20
   7 -16   0    9.50   22.20
   7 -16   0   47.00   41.40
  -7  16   0  -29.70   26.40
   7  16   0   53.29   41.90
  -7  16   0   22.00   26.60
   7  16   0  117.99   52.89
   7  16   0   -2.40   28.40
  -7  16   0   20.20   52.59
   7  16   0  -49.10   32.20
   7  16   0   -3.50   28.00
  -7  16   0   17.40   40.70
   8 -16   0    1.60   24.50
   8 -16   0  -21.10   19.60
  -8 -16   0    0.40   18.50
  -8 -16   0   27.90   28.40
   8 -16   0  -13.70   30.70
   8 -16   0   -3.30   25.20
  -8 -16   0   37.40   29.50
  -8 -16   0   -0.30   25.50
   8 -16   0  -36.90   22.30
  -8 -16   0  -11.60   41.60
   8  16   0    8.10   28.40
  -8  16   0   43.60   40.60
   8  16   0   17.80   39.60
  -8  16   0   32.60   35.70
  -8  16   0   67.79   39.90
   8  16   0   28.80   48.90
  -8  16   0   -6.40   21.70
   8  16   0   -0.20   35.10
   9 -16   0   59.69   25.50
  -9 -16   0   32.90   31.00
  -9 -16   0   23.30   20.80
   9 -16   0  -30.00   35.50
  -9 -16   0   57.29   62.19
  -9 -16   0    1.30   28.00
   9 -16   0  -22.10   17.80
   9 -16   0   62.59   34.40
   9 -16   0  -13.50   24.00
  -9 -16   0    5.50   31.60
   9  16   0   95.09   54.09
  -9  16   0   65.89   44.70
   9  16   0   25.70   31.10
  -9  16   0   -2.60   44.10
   9  16   0   76.19   45.70
  -9  16   0   17.20   35.30
   9  16   0   19.50   41.30
   0 -17   0  -16.50   22.90
   0 -17   0   31.20   22.40
   0 -17   0   -1.40   19.00
   0 -17   0   14.40   22.00
   0 -17   0   17.50   45.60
   0  17   0  -14.10   27.50
   0  17   0   43.10   36.30
   0  17   0   32.60   32.80
   0  17   0   27.10   28.10
   0  17   0   78.09   48.60
  -1 -17   0   -5.00   22.60
  -1 -17   0   16.10   25.40
  -1 -17   0    7.30   49.99
  -1 -17   0    7.60   19.00
   1 -17   0    9.00   20.50
   1 -17   0   62.89   47.30
   1 -17   0    3.00   24.10
   1 -17   0   13.90   23.70
  -1 -17   0    4.50   20.40
   1 -17   0    1.20   23.80
  -1  17   0    4.70   26.40
   1  17   0   24.10   44.80
  -1  17   0  -30.20   37.10
   1  17   0    3.70   21.30
   1  17   0    8.70   30.10
  -1  17   0  -12.60   37.50
  -1  17   0   34.60   32.00
   1  17   0   66.19   52.89
  -1  17   0   15.90   30.70
   1  17   0   -1.30   26.70
   2 -17   0   13.60   21.20
  -2 -17   0   -1.10   38.20
   2 -17   0    0.80   49.60
   2 -17   0   12.00   20.20
   2 -17   0   50.09   25.00
  -2 -17   0   12.00   22.80
  -2 -17   0   -9.80   17.80
  -2 -17   0   27.00   23.60
  -2 -17   0   30.80   27.80
   2 -17   0  -10.20   16.50
  -2  17   0   18.00   30.60
   2  17   0   18.90   31.30
  -2  17   0   65.99   56.29
  -2  17   0  -29.30   33.90
   2  17   0   40.80   35.90
  -2  17   0  -23.30   21.40
   2  17   0   70.29   51.99
   2  17   0   33.30   17.30
   2  17   0    3.10   22.70
   2  17   0   44.00   39.50
   3 -17   0   19.10   31.00
  -3 -17   0   -8.50   20.60
   3 -17   0  -27.20   19.80
   3 -17   0    3.00   20.80
   3 -17   0   -0.30   20.80
  -3 -17   0   53.29   52.49
   3 -17   0   63.19   47.40
  -3 -17   0   -8.30   22.50
   3 -17   0   12.10   24.60
  -3 -17   0  -30.20   18.60
  -3  17   0   36.10   29.30
   3  17   0   -7.60   25.30
  -3  17   0  -14.90   27.00
   3  17   0    8.30   31.10
   3  17   0  -34.70   43.80
  -3  17   0   28.30   43.80
   3  17   0  -85.39  105.89
  -3  17   0   20.40   41.00
  -3  17   0   31.20   28.60
   3  17   0   -0.50   15.20
   3  17   0   63.99   45.00
   4 -17   0   93.29   53.99
  -4 -17   0   77.79   33.30
  -4 -17   0  183.98   68.89
   4 -17   0   77.19   34.00
  -4 -17   0  129.29   34.40
   4 -17   0   93.49   27.00
   4 -17   0  103.59   29.50
   4 -17   0   75.49   30.20
  -4 -17   0   42.10   24.80
  -4 -17   0   34.20   25.50
  -4  17   0   56.29   32.20
   4  17   0   48.40   34.00
  -4  17   0   94.69   33.20
  -4  17   0  -29.10   34.30
   4  17   0   52.89   38.90
   4  17   0   50.89   38.50
   4  17   0  112.49   48.40
   4  17   0   83.59   50.09
  -4  17   0   83.69   48.40
  -4  17   0   18.60   33.10
  -5 -17   0   -5.80   55.39
   5 -17   0   79.79   47.10
  -5 -17   0   15.40   28.20
   5 -17   0   59.79   27.10
   5 -17   0   16.70   28.60
  -5 -17   0   13.20   20.00
  -5 -17   0    6.80   23.80
   5 -17   0   13.20   18.90
  -5 -17   0  -14.20   21.80
   5 -17   0  -21.90   22.00
  -5  17   0   59.99   47.60
   5  17   0    9.70   45.00
  -5  17   0  -20.80   27.80
   5  17   0  118.29   44.20
   5  17   0   19.40   39.30
   5  17   0    9.20   47.70
  -5  17   0    1.10   30.40
  -5  17   0   81.49   46.10
   6 -17   0   41.80   28.10
  -6 -17   0   52.69   26.50
   6 -17   0   96.29   29.40
  -6 -17   0  118.09   59.19
   6 -17   0   54.89   29.20
   6 -17   0   79.09   34.20
  -6 -17   0   42.40   24.90
  -6 -17   0   75.39   39.00
   6 -17   0  133.49   47.70
  -6  17   0   48.80   37.00
  -6  17   0  100.49   35.80
   6  17   0   64.49   45.60
  -6  17   0  132.19   58.29
  -6  17   0  126.59   59.79
   6  17   0   88.49   56.09
   6  17   0   53.19   37.00
   6  17   0  111.79   57.29
   6  17   0   60.79   33.30
   7 -17   0    3.80   21.80
  -7 -17   0   28.30   27.40
  -7 -17   0   47.70   51.29
   7 -17   0   51.39   31.00
   7 -17   0   31.30   44.70
  -7 -17   0  -10.40   29.40
   7 -17   0   14.30   25.70
  -7 -17   0  -52.09   24.10
   7  17   0    3.30   41.50
  -7  17   0  -39.60   26.60
   7  17   0   -3.20   36.00
  -7  17   0   27.80   49.40
  -7  17   0   38.80   30.90
   7  17   0  -26.00   31.40
   7  17   0   -8.40   27.20
  -7  17   0  -24.20   38.70
   7  17   0  -43.40   43.10
  -8 -17   0   26.60   30.90
   8 -17   0    5.90   21.80
   8 -17   0   -6.20   27.40
  -8 -17   0   29.50   37.40
   8 -17   0   53.19   40.00
   8 -17   0   11.50   25.60
  -8 -17   0   36.90   30.20
  -8 -17   0   57.99   55.69
   8 -17   0  -34.70   20.40
  -8  17   0   73.09   41.70
  -8  17   0   53.79   37.70
   8  17   0 -221.28  127.79
   8  17   0    3.30   51.29
   8  17   0   39.70   41.60
  -8  17   0   47.70   46.00
   8  17   0   44.10   43.00
   8  17   0   13.70   33.80
   0 -18   0   71.49   56.49
   0 -18   0   73.89   26.10
   0 -18   0    3.90   23.10
   0 -18   0   45.80   32.00
   0 -18   0   17.20   20.20
   0 -18   0  -19.40   26.00
   0  18   0   -8.90   26.60
   0  18   0  -52.69   35.20
   0  18   0   -3.50   31.60
   0  18   0   23.30   36.40
   0  18   0  -44.10   41.80
  -1 -18   0   47.90   24.00
  -1 -18   0    4.60   43.40
  -1 -18   0  145.39   38.90
   1 -18   0   54.19   29.80
   1 -18   0   58.09   24.70
  -1 -18   0   75.09   32.00
   1 -18   0   77.39   31.90
  -1 -18   0   73.69   29.80
   1 -18   0   68.89   27.40
  -1  18   0    8.20   31.60
  -1  18   0   46.60   42.80
  -1  18   0  165.18   65.79
   1  18   0   96.69   58.19
  -1  18   0  101.59   45.40
  -1  18   0   84.89   42.30
   1  18   0   98.19   53.49
   1  18   0   62.59   40.20
   1  18   0   88.09   44.60
   1  18   0   29.50   21.50
  -2 -18   0   -1.80   26.30
   2 -18   0  -29.20   24.80
  -2 -18   0   29.40   29.00
   2 -18   0    0.60   21.40
  -2 -18   0   62.89   55.69
  -2 -18   0   15.80   22.90
   2 -18   0  -28.50   18.70
  -2 -18   0   17.60   25.30
   2 -18   0   32.50   40.50
   2 -18   0   -9.70   27.20
   2 -18   0   35.70   25.80
   2  18   0   -1.40   23.00
   2  18   0   29.80   33.10
  -2  18   0  -36.30   40.10
  -2  18   0   66.99   36.80
  -2  18   0  -39.10   28.20
   2  18   0  106.09   49.90
  -2  18   0   37.20   35.10
   2  18   0    2.60   49.10
  -2  18   0  -94.89   40.70
   2  18   0  -15.50   41.80
  -3 -18   0   -0.40   22.40
   3 -18   0   -9.20   23.40
  -3 -18   0   -2.70   30.60
   3 -18   0   -1.70   18.70
  -3 -18   0    5.40   24.00
  -3 -18   0   14.00   18.20
   3 -18   0    6.30   23.70
   3 -18   0    0.20   28.10
   3 -18   0  -24.50   42.70
   3 -18   0   52.79   31.00
  -3 -18   0  -30.40   39.10
   3  18   0   36.90   38.90
  -3  18   0   10.60   27.10
   3  18   0    8.10   23.10
  -3  18   0   18.80   34.80
  -3  18   0   27.60   51.19
   3  18   0   31.30   34.00
   3  18   0   -6.00   44.10
   3  18   0   60.89   36.30
  -3  18   0   -9.00   30.10
  -3  18   0  -35.80   39.80
   4 -18   0  -21.10   24.50
  -4 -18   0   46.00   25.70
  -4 -18   0   -2.20   30.00
   4 -18   0  -27.70   28.30
  -4 -18   0  -46.00   39.70
  -4 -18   0   32.70   21.60
  -4 -18   0  -37.30   21.30
   4 -18   0   -4.20   21.90
   4 -18   0  -38.70   36.90
   4 -18   0   40.10   24.30
  -4  18   0   19.40   37.50
  -4  18   0   26.40   30.30
  -4  18   0   34.40   30.40
  -4  18   0   55.29   30.40
  -4  18   0  -13.60   49.70
   4  18   0   39.60   45.50
   4  18   0  -44.00   40.20
   4  18   0   18.80   34.90
   4  18   0   28.10   40.90
   4  18   0   25.30   31.60
   5 -18   0   80.29   42.70
   5 -18   0   64.59   54.19
   5 -18   0    0.90   24.40
  -5 -18   0   23.60   31.90
   5 -18   0  -22.10   25.40
  -5 -18   0   22.20   25.10
   5 -18   0   13.10   20.80
  -5 -18   0   70.99   55.79
  -5 -18   0    6.70   22.50
  -5 -18   0   23.40   29.10
  -5  18   0   39.60   44.20
  -5  18   0   45.80   36.80
   5  18   0   60.19   34.50
   5  18   0   -6.40   40.70
  -5  18   0    6.60   26.60
   5  18   0   86.69   53.29
   5  18   0   17.10   35.80
   5  18   0  114.69   56.69
  -5  18   0   40.00   55.39
   6 -18   0   14.00   19.10
   6 -18   0    8.80   22.70
  -6 -18   0   50.29   23.70
   6 -18   0    2.00   27.10
   6 -18   0  131.49   59.29
  -6 -18   0  122.29   61.99
  -6 -18   0   24.30   27.40
   6 -18   0    2.90   30.30
  -6 -18   0    3.30   31.60
   6  18   0  -49.30   45.80
  -6  18   0    1.50   52.79
  -6  18   0   43.20   42.60
   6  18   0   39.80   36.00
   6  18   0   76.69   45.10
  -6  18   0   35.00   37.60
   6  18   0   24.30   34.10
   6  18   0  114.29   58.39
   0 -19   0    9.60   24.00
   0 -19   0   37.30   24.90
   0 -19   0   -5.60   18.80
   0 -19   0   -3.00   27.60
   0 -19   0   71.19   52.19
   0 -19   0   -8.70   25.00
   0  19   0  -29.10   32.40
   0  19   0   44.60   55.79
   0  19   0  -49.90   31.80
   0  19   0  -23.90   31.10
   0  19   0   30.50   55.29
  -1 -19   0  112.79   62.99
  -1 -19   0   27.80   24.00
   1 -19   0  -21.10   28.30
  -1 -19   0   -0.90   25.90
   1 -19   0  -26.60   21.70
   1 -19   0   19.00   22.40
  -1 -19   0  -25.50   21.90
   1 -19   0  151.48   67.29
   1 -19   0   58.09   32.60
  -1 -19   0   44.70   23.80
   1  19   0  -56.59   32.70
  -1  19   0  138.29   60.29
  -1  19   0    5.80   36.30
  -1  19   0   33.70   30.00
   1  19   0    4.90   14.60
   1  19   0   50.79   36.30
  -1  19   0    4.60   36.00
   1  19   0   79.79   41.50
  -1  19   0  133.89   55.19
   1  19   0   25.10   49.50
  -2 -19   0   20.40   44.50
  -2 -19   0   55.39   32.50
  -2 -19   0  -23.40   21.20
   2 -19   0   68.99   31.90
   2 -19   0    3.10   31.30
   2 -19   0   75.79   66.29
   2 -19   0   20.80   24.30
  -2 -19   0  -20.00   23.50
   2 -19   0   15.20   27.70
  -2 -19   0    6.80   25.50
   2 -19   0    5.00   20.10
  -2  19   0  -23.70   28.90
  -2  19   0   24.40   37.60
   2  19   0   24.90   50.89
   2  19   0   44.70   47.40
  -2  19   0   11.90   55.99
   2  19   0   12.40   22.10
  -2  19   0  -35.30   29.70
  -2  19   0   35.60   49.00
   2  19   0  -62.49   26.00
   2  19   0   -4.30   37.00
   3 -19   0    6.90   23.60
  -3 -19   0   19.90   20.10
  -3 -19   0   77.39   59.69
  -3 -19   0   61.09   34.30
   3 -19   0   53.59   30.10
   3 -19   0  -48.40   19.80
   3 -19   0   38.30   34.30
   3 -19   0    8.80   25.30
   3 -19   0   49.20   54.79
  -3 -19   0  -20.20   24.00
  -3 -19   0  -41.90   23.90
  -3  19   0   15.20   41.70
  -3  19   0   -0.70   50.59
  -3  19   0   30.20   32.40
  -3  19   0   13.30   33.30
   3  19   0   23.70   39.80
   3  19   0   -0.90   42.00
   3  19   0  -10.30   25.30
  -3  19   0   -2.50   27.50
   3  19   0  114.19   51.89
   3  19   0   19.30   42.30
  -4 -19   0    8.60   29.30
  -4 -19   0  -28.00   42.30
   4 -19   0    4.10   28.20
  -4 -19   0   -4.60   20.20
  -4 -19   0   16.80   30.00
   4 -19   0  -45.60   29.60
  -4 -19   0  -16.00   24.30
   4 -19   0   10.00   31.70
   4 -19   0   -6.90   18.30
   4  19   0   -1.10   37.50
   4  19   0  117.69   63.69
  -4  19   0   33.90   33.20
  -4  19   0   55.99   49.20
   4  19   0   28.90   44.10
   4  19   0   41.20   36.70
  -4  19   0   18.60   36.90
  -4  19   0  -38.10   28.00
   4  19   0   13.90   45.00
  -4  19   0  -43.10   39.90
 -16   0   1  -31.20   19.00
 -16   0   1   -6.00   25.10
 -16   0   1  -34.30   21.00
  16   0  -1   -4.60   35.40
 -16   0   1   12.20   24.60
 -15   0   1   48.10   26.80
 -15   0   1   32.60   21.60
 -15   0   1   38.90   27.40
  15   0  -1   -8.10   23.30
 -15   0   1    9.00   23.60
  15   0  -1   17.90   30.90
  14   0  -1   33.10   23.60
 -14   0   1  -21.30   18.00
  14   0  -1   19.80   28.00
 -14   0   1  -20.70   22.50
 -14   0   1   66.09   23.40
 -14   0   1  -40.80   19.80
 -14   0   1   24.10   11.80
 -14   0   1  -19.90   20.80
  14   0  -1   -6.70   21.40
 -13   0   1   67.69   28.90
  13   0  -1  -35.00   95.09
  13   0  -1   30.30   26.30
 -13   0   1   45.80   24.20
 -13   0   1   41.30   14.40
 -13   0   1   53.59   14.30
 -13   0   1   30.80   24.00
 -13   0   1  -10.80   17.80
  13   0  -1   -8.90   19.80
 -13   0   1   48.80   25.40
  13   0  -1   17.90   23.60
  13   0  -1   50.89   19.30
 -12   0   1   50.19   26.50
  12   0  -1   25.60   24.10
  11   0  -1  236.68   41.50
 -11   0   1  268.07   41.50
 -11   0   1  228.68   42.70
 -11   0   1  282.17   38.20
  11   0  -1  259.37   45.70
  11   0  -1  232.28   31.10
 -11   0   1  251.57   28.20
  11   0  -1  196.58   34.30
 -11   0   1  183.88   38.00
 -11   0   1  228.08   39.10
 -11   0   1  284.87   44.20
 -11   0   1  219.68   35.30
  11   0  -1  196.08   37.20
  11   0  -1  310.17   46.10
  10   0  -1    3.60   11.90
 -10   0   1   -6.00   18.50
 -10   0   1   -2.70   16.30
 -10   0   1   -0.10   16.50
  10   0  -1    4.70   17.10
  10   0  -1    0.50   16.70
 -10   0   1    1.60   19.00
 -10   0   1    4.40   10.00
  10   0  -1    1.40   17.20
 -10   0   1  -16.90   13.70
 -10   0   1   29.40   12.60
  10   0  -1   27.20   25.40
 -10   0   1   11.40   15.60
 -10   0   1   15.50   14.50
  10   0  -1   35.00   17.00
 -10   0   1   -1.20   17.90
 -10   0   1    3.60    9.20
  -9   0   1  424.26   40.90
  -9   0   1  376.76   40.00
  -9   0   1  437.96   46.80
  -9   0   1  384.26   45.20
   9   0  -1  383.96   46.40
  -9   0   1  383.46   45.50
   9   0  -1  408.56   45.60
   9   0  -1  430.56   43.30
   9   0  -1  354.86   45.70
  -9   0   1  394.66   38.70
  -9   0   1  405.86   46.30
   9   0  -1  337.37   43.50
  -9   0   1  353.16   40.70
  -9   0   1  391.36   44.90
  -8   0   1   -4.70    8.70
   8   0  -1   24.40   12.70
  -8   0   1   -3.10   11.30
  -8   0   1   -9.80   10.00
  -8   0   1  -13.70    7.50
  -8   0   1   -4.20    8.70
  -8   0   1   17.70   12.30
   8   0  -1    3.20   14.50
  -8   0   1   23.00   15.60
  -8   0   1   40.50   47.00
   8   0  -1    6.30   12.30
  -8   0   1    5.60   13.90
  -8   0   1   12.70   11.70
  -8   0   1   19.20   15.80
   8   0  -1  -14.20   10.10
   8   0  -1   35.30   15.70
  -8   0   1    3.00   15.30
  -8   0   1    1.60   10.10
  -8   0   1   13.30   14.70
   8   0  -1    0.10   11.30
  -7   0   1   15.00   10.70
   7   0  -1   11.40   14.90
  -7   0   1   24.60   14.90
   7   0  -1    0.20   10.80
  -7   0   1   23.80    9.40
  -7   0   1   19.40   11.90
   7   0  -1   26.20   14.90
   7   0  -1   17.20   16.20
  -7   0   1    9.00    9.70
  -7   0   1    1.40   12.40
  -7   0   1    5.20   13.90
  -7   0   1   22.80   12.00
  -7   0   1   28.10   11.60
  -7   0   1   -2.70    9.60
  -7   0   1   -1.30   13.90
  -7   0   1   -7.80   12.00
  -7   0   1    7.70    8.00
  -7   0   1   27.00   37.70
   7   0  -1    6.70   10.30
   7   0  -1   16.10   12.70
  -6   0   1   91.59   16.60
  -6   0   1  125.49   17.80
  -6   0   1  170.18   51.89
  -6   0   1   88.19   19.70
  -6   0   1   77.09   18.60
  -6   0   1   85.69   22.10
  -6   0   1  100.29   17.60
  -6   0   1  119.69   20.90
   6   0  -1  127.19   22.30
   6   0  -1  125.89   23.20
   6   0  -1  132.49   19.60
   6   0  -1   60.19   16.00
  -6   0   1   95.89   15.90
   5   0  -1   18.70   12.50
   5   0  -1   24.00   11.90
  -5   0   1   20.30   12.10
  -5   0   1   12.00   13.30
  -5   0   1   29.10   11.80
   5   0  -1    7.70   12.90
  -5   0   1    2.90   37.50
   5   0  -1   11.30   14.20
  -5   0   1    4.00    9.20
  -5   0   1   19.10    9.80
  -5   0   1   13.50   10.90
  -5   0   1    7.10   12.50
   5   0  -1  -22.60   13.40
  -5   0   1   26.20    9.60
  -5   0   1   20.30   11.30
  -5   0   1    6.40   14.40
  -5   0   1    7.30   10.20
  -5   0   1   15.40   10.80
   5   0  -1   19.50   12.40
  -5   0   1   12.50   13.20
  -5   0   1   15.30    9.40
  -4   0   1   30.50   10.50
  -4   0   1   42.90   12.80
   4   0  -1    9.80   11.50
  -4   0   1   35.60   10.50
   4   0  -1   18.10   14.00
  -4   0   1   11.80   13.40
  -4   0   1   15.70    8.50
  -4   0   1   43.60   11.30
   4   0  -1   44.90   11.50
  -4   0   1   22.90   10.20
  -4   0   1   13.10   38.20
  -4   0   1   26.00   10.40
  -4   0   1   56.19   11.60
   4   0  -1   26.50   13.00
   4   0  -1   59.09   12.60
  -4   0   1   24.90   11.00
  -4   0   1    6.20   12.00
  -4   0   1    4.20    8.20
   4   0  -1   39.90   11.70
   4   0  -1   33.00   11.10
  -4   0   1   55.49   14.40
   3   0  -1 5817.82  444.76
  -3   0   1 5711.13  444.76
  -3   0   1 5316.87  443.06
  -3   0   1 5575.54  444.26
   3   0  -1 5685.13  444.16
  -3   0   1 5245.18  441.76
   3   0  -1 5565.34  445.86
  -3   0   1 6111.69  444.76
   3   0  -1 5841.42  445.36
  -3   0   1 5061.49  443.46
   3   0  -1 5708.93  444.96
  -3   0   1 5173.98  444.86
   3   0  -1 5184.58  443.46
  -3   0   1 5496.65  445.86
  -3   0   1 5138.39  441.76
  -3   0   1 5324.67  444.86
  -3   0   1 5883.11  444.06
  -3   0   1 6155.78  445.06
   3   0  -1 5847.72  444.76
  -2   0   1    5.80    3.50
  -2   0   1    1.40    3.70
   2   0  -1    1.10    4.70
   2   0  -1    3.40    5.10
   2   0  -1    5.00    4.80
  -2   0   1    4.20    4.10
  -2   0   1   -0.40    4.80
   2   0  -1   -0.80   18.50
  -2   0   1    3.70   18.10
   2   0  -1    0.30    1.50
  -2   0   1    2.10    4.60
  -2   0   1    5.30    6.60
   2   0  -1  -19.90    7.50
  -2   0   1  -11.50    5.40
  -2   0   1    7.90    5.70
   2   0  -1    0.20    4.50
   2   0  -1    4.50    4.60
  -2   0   1    3.60    4.40
  -2   0   1    6.00    5.10
   2   0  -1    4.20    5.10
  -1   0   1    0.30    1.10
   2   0   1    4.70    4.60
   2   0   1    6.20    5.30
   2   0   1    3.40    4.20
  -2   0  -1   14.90    8.10
  -2   0  -1    3.70    3.70
  -2   0  -1    4.60    7.10
  -2   0  -1    1.70    6.40
  -2   0  -1    6.20    5.80
   2   0   1   11.10    6.50
  -2   0  -1   11.30    5.40
   2   0   1   15.80    8.80
  -2   0  -1   10.50    5.00
  -2   0  -1    3.30    7.10
  -2   0  -1   20.00    6.50
   2   0   1    4.60    5.00
  -2   0  -1   -3.20    8.20
   2   0   1    4.30    6.80
  -2   0  -1   11.40   10.70
   2   0   1    6.80    8.50
   2   0   1   15.00    9.40
   2   0   1   16.20    7.80
   2   0   1    2.10    3.80
  -2   0  -1    9.50    4.30
  -3   0  -1  129.39   17.70
  -3   0  -1   89.39   14.00
   3   0   1  140.99   16.20
  -3   0  -1  110.49   20.30
   3   0   1  128.79   16.70
  -3   0  -1   95.79   15.80
   3   0   1   77.39   11.90
   3   0   1  107.09   18.40
  -3   0  -1   73.09   11.60
  -3   0  -1  108.09   19.00
  -3   0  -1   66.39   15.80
   3   0   1   73.49   12.60
   3   0   1   43.30   37.00
  -3   0  -1   64.19   11.50
   3   0   1  138.69   21.20
  -4   0  -1    5.40    6.30
  -4   0  -1    6.10    7.30
   4   0   1    6.40    8.90
  -4   0  -1   20.00   11.20
  -4   0  -1    4.30    8.10
  -4   0  -1   -8.00   10.00
  -4   0  -1   -0.90    6.10
  -4   0  -1    8.30    8.50
  -4   0  -1   13.50   11.90
   4   0   1   21.30    9.60
   4   0   1    5.30    9.20
   4   0   1    1.60   13.00
   4   0   1    3.50    9.70
   4   0   1   -4.10    5.70
  -4   0  -1    3.80   11.00
   4   0   1   -0.70   11.30
  -4   0  -1   20.00    9.70
   4   0   1   -4.10    9.40
  -4   0  -1   -1.00   12.10
  -4   0  -1   -3.60   13.60
   4   0   1    3.90   11.60
   4   0   1    1.90    9.80
  -5   0  -1   44.90    9.80
  -5   0  -1   40.70   14.00
   5   0   1   33.00   12.90
  -5   0  -1   32.10   18.40
   5   0   1   10.10   10.10
  -5   0  -1   47.00   12.60
   5   0   1   43.10   12.90
   5   0   1   19.10   11.80
  -5   0  -1   25.90    8.40
  -5   0  -1   18.40   13.00
  -5   0  -1   33.70   14.90
   5   0   1   28.20   14.00
  -5   0  -1   50.29   17.20
   5   0   1   29.60   12.10
  -5   0  -1   35.20   12.30
   5   0   1   37.80   12.30
   5   0   1   45.90   15.00
  -5   0  -1   28.70   11.90
  -5   0  -1   16.90   11.10
   5   0   1   65.39   17.20
  -5   0  -1   44.40   14.90
   5   0   1   45.30    9.00
  -6   0  -1    6.10   11.20
   6   0   1   23.10   13.30
  -6   0  -1    0.40   13.20
  -6   0  -1    7.70    9.20
  -6   0  -1    5.00    9.20
  -6   0  -1    9.50   11.80
   6   0   1    3.90    9.50
   6   0   1    7.70   14.80
  -6   0  -1   21.70   16.70
  -6   0  -1    8.80   12.10
  -6   0  -1   12.60    7.80
  -6   0  -1    6.90   13.90
   6   0   1    4.40   14.40
  -6   0  -1    3.80    7.50
   6   0   1    8.20   10.90
   6   0   1   15.10   13.50
  -6   0  -1   -2.50   12.40
   6   0   1   29.20   12.70
  -6   0  -1   30.80   14.30
  -6   0  -1   26.90   19.00
   6   0   1   17.40    9.00
   6   0   1    6.60   11.10
  -7   0  -1   -9.50   11.80
   7   0   1    0.60   12.50
   7   0   1   -7.60   10.90
   7   0   1   -7.20   10.00
   7   0   1    8.00   10.90
  -7   0  -1   13.00   12.00
  -7   0  -1    6.50    7.40
  -7   0  -1    5.70   12.70
  -7   0  -1  -14.20    8.30
  -7   0  -1   30.80   14.00
  -7   0  -1   -0.10   16.70
  -7   0  -1   -4.60   14.00
  -7   0  -1   -2.50    8.30
   7   0   1   33.30   15.70
   7   0   1    3.90   11.10
  -7   0  -1   -4.40   15.70
  -7   0  -1    1.80   11.60
  -7   0  -1   -0.40    6.40
   7   0   1    6.60    4.80
  -7   0  -1    7.40   14.50
   8   0   1   19.50   16.30
  -8   0  -1   -2.40    8.90
   8   0   1   -6.90   12.30
  -8   0  -1    9.20   15.40
  -8   0  -1   16.30   14.50
  -8   0  -1   -3.20   10.00
  -8   0  -1    3.00   13.00
   8   0   1   -3.10   11.90
  -8   0  -1   18.50   17.80
  -8   0  -1    5.70   16.80
  -8   0  -1    7.60   13.60
   8   0   1   -9.50   11.20
  -8   0  -1   -2.00    7.60
  -8   0  -1    1.20    9.50
  -8   0  -1   10.20   13.40
   8   0   1   37.40   14.00
  -8   0  -1   15.40    6.60
  -8   0  -1   -5.10    8.70
  -9   0  -1   -3.40   14.20
  -9   0  -1   10.90   15.20
  -9   0  -1   38.90   20.00
  -9   0  -1    6.20   17.90
   9   0   1    4.20   15.00
   9   0   1   -0.90   15.50
  -9   0  -1   27.60   19.00
   9   0   1   12.40   16.40
  -9   0  -1   11.90    8.40
   9   0   1    4.40   16.20
   9   0   1   11.60   14.30
   9   0   1   14.60   17.40
  -9   0  -1   18.20   16.70
  -9   0  -1   -8.50   20.10
  -9   0  -1    0.00   19.10
 -10   0  -1   16.30   19.40
 -10   0  -1  -16.10   17.20
 -10   0  -1  -23.70   11.10
 -10   0  -1   25.60   22.60
 -10   0  -1    5.00   19.10
 -10   0  -1   19.10   14.30
  10   0   1   15.70   18.50
 -10   0  -1   57.49   25.10
  10   0   1   17.00   21.30
 -10   0  -1    5.80   17.20
 -10   0  -1  -14.50   17.90
  10   0   1   -5.90   15.90
  10   0   1   -1.80   15.80
  10   0   1   10.70   16.90
  11   0   1  571.24  121.69
 -11   0  -1  626.64   62.29
  11   0   1  566.64   62.19
  11   0   1  532.15   62.99
 -11   0  -1  548.35   61.89
 -11   0  -1  501.15   63.59
 -11   0  -1  660.53   66.39
  11   0   1  512.95   59.09
 -11   0  -1  538.45   57.99
  11   0   1  541.65   60.69
  11   0   1  664.93   65.89
 -11   0  -1  521.95   59.89
 -11   0  -1  561.04   63.39
  12   0   1   33.00   22.10
 -12   0  -1  -15.50   17.40
  12   0   1   25.20   23.50
 -12   0  -1   -9.30   17.10
  12   0   1   28.80   22.20
 -12   0  -1    1.00   20.20
  12   0   1   24.00   26.20
 -12   0  -1   -1.90   22.20
 -12   0  -1   12.70    9.30
 -12   0  -1   -8.00   23.30
 -12   0  -1   -2.80   27.50
 -13   0  -1  -29.10   19.20
 -13   0  -1  -22.50   19.00
  13   0   1   10.50   24.10
 -13   0  -1    5.80   20.30
  13   0   1   -9.30   16.80
 -13   0  -1   61.69   27.20
 -13   0  -1   -6.70   20.50
  14   0   1    6.90   29.90
 -14   0  -1   11.50   28.20
 -14   0  -1   11.40   20.90
  14   0   1   18.80   22.30
  14   0   1  -44.70   17.90
 -14   0  -1    7.60   24.90
 -14   0  -1  -23.30   19.00
 -14   0  -1   18.80   25.20
  15   0   1  -17.50   21.10
 -15   0  -1    7.00   22.10
 -15   0  -1   22.30   28.90
 -15   0  -1   11.10   25.30
 -15   0  -1  -11.60   22.90
  15   0   1   12.70   29.60
 -16   0  -1   54.79   28.30
 -16   0  -1   41.50   31.00
  16   0   1   42.40   37.00
 -16   0  -1   25.60   26.70
 -16   0  -1   11.50   28.40
 -16  -1   1   72.69   28.60
 -16  -1   1  -14.10   22.60
 -16  -1   1   39.40   26.90
 -16  -1   1   -5.00   20.80
  16  -1  -1   27.50   23.80
  16  -1  -1  -14.00   27.60
 -16   1   1   17.70   21.60
 -16   1   1   14.60   22.20
 -16   1   1   13.70   24.10
 -16   1   1   58.99   27.80
  16   1  -1    5.90   41.20
 -15  -1   1   38.80   28.20
 -15  -1   1   11.40   13.30
 -15  -1   1    4.00   25.40
 -15  -1   1   34.40   23.00
 -15  -1   1   14.00   27.10
  15  -1  -1   26.80   29.20
  15  -1  -1  -48.10   17.40
 -15  -1   1   38.80   22.10
 -15   1   1   13.60   22.60
 -15   1   1    7.10   20.80
 -15   1   1   55.99   27.40
 -15   1   1   21.20   22.50
 -15   1   1    3.00   21.30
  15   1  -1   24.20   34.50
 -14  -1   1   -2.90   14.30
  14  -1  -1   12.00   22.30
 -14  -1   1   -4.70   19.80
  14  -1  -1   39.50   18.00
 -14  -1   1   16.70   14.00
  14  -1  -1   46.10   28.50
 -14  -1   1   34.00   19.60
 -14  -1   1   16.20   22.40
 -14  -1   1   -7.80   20.70
 -14  -1   1   17.60   23.60
 -14   1   1    9.50   22.10
  14   1  -1   36.50   27.10
 -14   1   1  -23.70   19.20
 -14   1   1   11.10   22.50
  14   1  -1   22.20   34.70
 -14   1   1   22.80   22.90
 -13  -1   1   15.10   20.90
 -13  -1   1    8.60   15.80
 -13  -1   1  -16.30   16.10
 -13  -1   1   21.30   19.60
 -13  -1   1   53.19   26.40
 -13  -1   1   22.50   15.70
  13  -1  -1   -1.90   25.00
  13  -1  -1   22.50   22.20
  13  -1  -1    5.70   17.00
 -13   1   1  103.29   26.90
 -13   1   1   24.30   24.20
  13   1  -1    4.70   28.50
 -13   1   1  -11.20   21.50
  13   1  -1   -2.90   22.10
  13   1  -1   -3.50  103.99
 -13   1   1   30.10   24.10
  13   1  -1  -15.20   20.20
 -13   1   1   30.90    8.70
  13   1  -1   -6.60   17.00
 -13   1   1   21.60   26.20
 -13   1   1    0.60   17.80
 -12  -1   1   10.40   22.20
 -12  -1   1   36.70   22.60
 -12  -1   1   59.19   27.20
 -12  -1   1   30.40   19.50
  12  -1  -1   22.30   22.70
  12  -1  -1   32.90   22.10
 -12  -1   1   24.80   22.80
 -12  -1   1   43.20   20.80
  12  -1  -1   57.89   18.20
  12  -1  -1   46.10   23.00
 -12  -1   1   22.00   15.00
 -12   1   1   50.99   23.40
 -12   1   1   21.40   10.60
  12   1  -1   24.20   24.50
 -12   1   1   62.39   25.60
 -12   1   1   78.69   24.30
 -12   1   1   11.90   20.30
  12   1  -1   53.09   19.10
  12   1  -1   10.70   20.10
 -12   1   1   56.49   23.70
  12   1  -1  -14.40   87.39
  12   1  -1   43.40   29.50
 -12   1   1    5.50   17.90
 -12   1   1   34.20   18.80
  11  -1  -1   76.69   22.20
  11  -1  -1   69.49   25.10
  11  -1  -1   10.50   19.40
 -11  -1   1   50.29   20.70
 -11  -1   1   57.79   22.70
  11  -1  -1   63.89   18.80
 -11  -1   1   65.49   31.20
 -11  -1   1   42.70   17.10
  11  -1  -1   22.80   24.30
 -11  -1   1   61.09   24.60
 -11  -1   1   47.80   26.10
 -11  -1   1   39.40   24.60
  11  -1  -1   55.99   25.80
 -11  -1   1   99.89   19.70
 -11   1   1   58.59   23.20
  11   1  -1   42.30   22.80
  11   1  -1   57.19   35.80
  11   1  -1   25.30   16.30
  11   1  -1   80.29   27.80
  11   1  -1   54.59   83.89
 -11   1   1   26.40   21.90
 -11   1   1   66.09   24.10
 -11   1   1   71.79   15.00
 -11   1   1   63.19   26.10
 -11   1   1   59.79   26.70
 -11   1   1   81.49   24.30
 -11   1   1   60.19   26.60
 -11   1   1   46.40   20.00
 -11   1   1   65.09   15.40
 -10  -1   1  131.19   27.40
 -10  -1   1  109.19   24.60
  10  -1  -1   69.29   24.10
  10  -1  -1  122.39   30.40
 -10  -1   1  100.39   20.40
  10  -1  -1  123.29   31.10
  10  -1  -1   85.69   20.20
 -10  -1   1   98.39   31.10
  10  -1  -1  146.29   29.30
 -10  -1   1  118.09   24.40
  10  -1  -1  104.19   22.50
 -10  -1   1   56.39   23.50
 -10  -1   1  140.39   32.20
  10  -1  -1   73.19   71.79
 -10  -1   1  119.59   33.20
 -10   1   1  117.29   24.90
 -10   1   1  130.59   20.40
  10   1  -1  119.99   24.40
 -10   1   1   94.79   27.00
  10   1  -1  173.98   80.59
 -10   1   1  158.68   26.00
  10   1  -1   59.49   22.00
 -10   1   1  127.19   29.50
 -10   1   1   99.39   23.10
 -10   1   1   83.89   26.80
 -10   1   1   75.39   26.90
 -10   1   1   92.99   26.40
  10   1  -1   89.29   31.10
  10   1  -1   62.19   25.90
 -10   1   1   99.29   18.20
   9  -1  -1   40.50   19.30
   9  -1  -1   89.89   25.40
  -9  -1   1   98.69   24.70
  -9  -1   1   78.69   23.40
   9  -1  -1   61.59   17.80
  -9  -1   1   97.69   22.80
  -9  -1   1   97.69   24.80
  -9  -1   1   70.29   24.90
   9  -1  -1  120.69   27.80
  -9  -1   1  114.49   20.40
  -9  -1   1   79.19   17.90
   9  -1  -1  119.49   25.70
  -9  -1   1   51.99   21.20
  -9  -1   1  102.09   21.70
   9  -1  -1   97.79   20.70
   9   1  -1  196.78   67.69
   9   1  -1  106.99   21.60
  -9   1   1   82.39   23.50
  -9   1   1   96.29   18.60
  -9   1   1   75.59   23.70
  -9   1   1  111.99   27.90
  -9   1   1   99.09   19.40
  -9   1   1   90.99   19.40
  -9   1   1  145.99   27.10
  -9   1   1  102.29   17.70
  -9   1   1   71.19   16.90
  -9   1   1   68.99   22.60
  -9   1   1  124.49   26.00
   9   1  -1   96.49   30.50
  -9   1   1  158.58   67.39
   9   1  -1   74.69   22.10
   9   1  -1  111.89   27.10
  -9   1   1   86.59   21.80
  -8  -1   1   -3.10   13.10
  -8  -1   1   -0.10   12.60
  -8  -1   1    5.90    9.10
   8  -1  -1   12.50   14.80
  -8  -1   1   -3.50    9.70
   8  -1  -1   -3.90   11.40
  -8  -1   1   15.50   10.10
   8  -1  -1   14.60   14.20
  -8  -1   1   20.00   17.90
  -8  -1   1   -5.30   11.70
   8  -1  -1    0.60   12.90
  -8  -1   1   -6.80   10.80
   8  -1  -1   11.10   15.00
   8  -1  -1    2.30    8.30
  -8  -1   1    4.00    8.50
  -8  -1   1   34.40   19.10
  -8  -1   1   -3.50    8.80
  -8  -1   1  -20.20    9.30
  -8   1   1   11.40   13.50
  -8   1   1    2.60    8.60
  -8   1   1   27.30   40.20
  -8   1   1   14.90   13.50
  -8   1   1   23.90   16.00
  -8   1   1    7.70   14.40
  -8   1   1  -17.70    9.20
   8   1  -1    0.10   16.00
   8   1  -1    2.40   13.80
  -8   1   1   -5.90    9.60
  -8   1   1    5.70    9.50
   8   1  -1   -3.00   14.10
   8   1  -1    7.00   12.90
  -8   1   1   43.40   12.80
   8   1  -1   33.50   20.00
  -8   1   1   -6.80   13.20
  -8   1   1   -4.70    9.30
  -8   1   1   27.80   15.60
  -8   1   1    0.70   11.90
  -8   1   1   14.80    9.70
  -7  -1   1   99.99   24.00
  -7  -1   1   87.89   21.10
   7  -1  -1   59.39   19.50
   7  -1  -1  123.69   20.80
   7  -1  -1   89.99   19.80
  -7  -1   1  108.39   20.50
  -7  -1   1  104.59   21.10
  -7  -1   1  115.89   14.10
  -7  -1   1   88.29   21.50
  -7  -1   1  141.09   22.40
  -7  -1   1  118.69   20.20
  -7  -1   1   82.89   20.80
   7  -1  -1   96.29   21.50
   7  -1  -1  104.29   22.90
  -7  -1   1  139.69   26.70
  -7  -1   1  109.49   17.50
  -7  -1   1  111.09   18.80
  -7  -1   1   78.29   44.40
   7  -1  -1   88.89   20.90
   7   1  -1   67.49   19.20
  -7   1   1  121.69   19.20
  -7   1   1  100.19   21.60
  -7   1   1  145.99   20.80
   7   1  -1  106.69   24.30
   7   1  -1   91.89   20.70
   7   1  -1   93.19   21.40
  -7   1   1  149.39   24.60
  -7   1   1   85.69   21.50
   7   1  -1   90.09   20.30
  -7   1   1  114.39   23.40
  -7   1   1  113.39   19.60
  -7   1   1  120.89   23.50
   7   1  -1   90.19   23.00
  -7   1   1  132.39   21.50
  -7   1   1  121.69   23.50
  -7   1   1   91.59   15.70
  -7   1   1   57.99   48.50
  -7   1   1   97.29   22.70
  -6  -1   1 1129.69   93.29
   6  -1  -1 1107.69   96.99
  -6  -1   1  976.10   94.09
   6  -1  -1 1101.29   93.69
   6  -1  -1 1194.98   95.39
  -6  -1   1 1111.89   91.89
   6  -1  -1 1206.38   95.59
  -6  -1   1 1111.59   91.39
   6  -1  -1  980.00   94.09
  -6  -1   1 1049.49   95.89
  -6  -1   1 1150.28   88.89
  -6  -1   1 1040.40   94.09
  -6  -1   1 1089.59   96.99
  -6  -1   1 1024.60   93.59
  -6  -1   1 1003.70   92.99
   6  -1  -1 1081.79   92.89
  -6  -1   1 1021.80   94.89
  -6  -1   1 1191.08   94.49
  -6  -1   1 1120.69   94.19
   6   1  -1 1054.39   92.89
  -6   1   1 1134.19   94.79
  -6   1   1 1079.39   94.09
  -6   1   1 1158.08   92.39
  -6   1   1 1018.30   93.69
  -6   1   1 1128.89   93.99
  -6   1   1 1116.69   94.49
   6   1  -1 1017.50   95.39
   6   1  -1  977.10   96.09
  -6   1   1 1081.99   90.79
  -6   1   1 1071.19   92.69
  -6   1   1 1163.48   91.99
  -6   1   1 1129.79   94.39
   6   1  -1 1087.19   94.89
   6   1  -1  993.70   94.09
  -6   1   1 1045.70   95.89
  -6   1   1 1112.19   94.59
   6   1  -1 1055.09   94.39
  -5  -1   1  221.98   30.70
  -5  -1   1  227.48   28.20
  -5  -1   1  279.17   29.80
  -5  -1   1  254.87   28.50
   5  -1  -1  227.38   27.10
   5  -1  -1  222.18   28.20
  -5  -1   1  293.67   32.30
  -5  -1   1  291.37   61.79
   5  -1  -1  253.17   31.50
  -5  -1   1  255.37   30.70
  -5  -1   1  249.48   27.50
  -5  -1   1  217.98   23.30
  -5  -1   1  267.87   27.30
  -5  -1   1  261.17   27.40
   5  -1  -1  240.28   27.80
  -5  -1   1  258.57   27.40
  -5  -1   1  293.87   27.70
   5  -1  -1  235.08   28.40
   5  -1  -1  218.58   28.40
  -5  -1   1  242.48   26.80
  -5  -1   1  267.77   25.40
  -5   1   1  260.47   29.00
   5   1  -1  260.07   27.00
   5   1  -1  299.07   33.40
  -5   1   1  220.08   54.89
  -5   1   1  253.57   27.80
  -5   1   1  230.98   28.20
  -5   1   1  240.68   27.70
   5   1  -1  173.28   59.79
   5   1  -1  229.88   29.70
  -5   1   1  231.28   26.90
  -5   1   1  216.58   25.60
  -5   1   1  294.17   29.50
  -5   1   1  220.58   24.00
  -5   1   1  256.47   30.60
  -5   1   1  277.97   27.20
  -5   1   1  282.27   28.30
  -5   1   1  224.78   25.70
   5   1  -1  244.58   31.70
   5   1  -1  247.68   28.80
   5   1  -1  249.58   27.80
   4  -1  -1  106.59   17.50
  -4  -1   1  135.69   18.20
  -4  -1   1  141.39   23.10
  -4  -1   1  124.29   17.90
  -4  -1   1  116.99   19.80
   4  -1  -1  149.99   19.30
  -4  -1   1   95.09   16.60
   4  -1  -1  137.89   18.80
  -4  -1   1  106.29   16.80
  -4  -1   1   67.09   43.80
  -4  -1   1  122.99   15.40
  -4  -1   1  157.48   19.20
   4  -1  -1  126.29   18.70
  -4  -1   1  108.99   17.90
   4  -1  -1  129.39   22.20
  -4  -1   1  124.89   20.60
  -4  -1   1  126.39   19.00
   4  -1  -1   91.49   17.50
  -4  -1   1  108.19   15.70
   4  -1  -1  152.48   18.30
  -4  -1   1  110.79   18.00
  -4   1   1  101.89   17.60
  -4   1   1  100.49   20.50
  -4   1   1  107.99   17.70
  -4   1   1  109.29   16.60
   4   1  -1   81.29   16.50
  -4   1   1  156.48   22.20
   4   1  -1  123.79   23.70
  -4   1   1  133.89   15.80
  -4   1   1  116.39   12.80
   4   1  -1  124.29   20.70
  -4   1   1  147.39   18.40
  -4   1   1  135.69   18.40
  -4   1   1  146.99   18.60
  -4   1   1  109.69   14.60
  -4   1   1  115.49   18.20
   4   1  -1   96.49   17.70
   4   1  -1  156.28   21.20
   4   1  -1  127.89   17.50
  -4   1   1  122.99   41.30
  -3  -1   1 1076.59   95.49
   3  -1  -1 1232.98   97.69
  -3  -1   1 1370.66   99.59
   3  -1  -1 1135.69   97.29
  -3  -1   1 1153.68   99.09
  -3  -1   1 1170.38   95.49
   3  -1  -1 1157.68   98.89
   3  -1  -1 1219.28   96.49
   3  -1  -1 1123.49   96.89
  -3  -1   1 1154.98   96.49
   3  -1  -1 1189.38   97.19
   3  -1  -1 1027.80   95.89
  -3  -1   1 1198.08   97.59
  -3  -1   1 1139.29   97.99
  -3  -1   1 1220.38   96.99
   3  -1  -1 1177.68   97.49
  -3  -1   1 1255.97   97.69
  -3  -1   1 1179.78   98.19
  -3  -1   1 1199.18   96.59
  -3   1   1 1132.69   98.69
  -3   1   1 1065.99   95.89
  -3   1   1 1185.58   97.49
  -3   1   1 1059.19   96.59
   3   1  -1 1158.28   97.49
  -3   1   1 1102.99   96.79
  -3   1   1 1400.66   99.79
   3   1  -1 1142.89   96.19
   3   1  -1 1151.58   97.89
  -3   1   1 1121.69   95.99
   3   1  -1 1306.77   97.89
  -3   1   1 1236.68   97.19
   3   1  -1 1196.08   99.79
   3   1  -1 1353.46   95.79
   3   1  -1 1088.79   98.49
   2  -1  -1  262.87   22.20
  -2  -1   1  224.08   23.90
   2  -1  -1  255.57   22.30
   2  -1  -1  265.37   24.30
  -2  -1   1  245.68   22.00
  -2  -1   1  232.28   23.30
  -2  -1   1  270.07   22.30
   2  -1  -1  238.08   37.80
   2  -1  -1  218.18   22.90
  -2  -1   1  163.18   39.20
  -2  -1   1  222.08   20.50
  -2  -1   1  219.28   22.10
   2  -1  -1  218.08   21.20
  -2  -1   1  217.98   22.40
  -2  -1   1  248.78   21.80
  -2  -1   1  230.88   20.00
  -2  -1   1  211.48   22.40
   2  -1  -1  250.27   20.80
   2  -1  -1  230.18   22.90
  -2  -1   1  205.28   20.40
  -2  -1   1  219.78   20.70
   2   1  -1  233.28   21.10
   2   1  -1  237.68   24.50
  -2   1   1  229.78   21.30
  -2   1   1  262.07   22.00
   2   1  -1  236.68   20.70
  -2   1   1  248.48   22.10
  -2   1   1  212.08   23.10
  -2   1   1  221.58   21.30
   2   1  -1  246.48   25.60
  -2   1   1  210.78   21.30
  -2   1   1  250.47   21.80
   2   1  -1  204.08   19.90
  -2   1   1  250.27   22.00
  -2   1   1  219.78   22.30
   2   1  -1  233.48   23.00
   2   1  -1  235.28   21.70
   2   1  -1  263.97   20.30
  -2   1   1  209.38   20.30
  -1  -1   1   35.50    7.10
  -1  -1   1   33.40   15.90
   1  -1  -1   38.40    6.60
   1  -1  -1   47.00    8.80
   1   1  -1   59.29    8.00
  -1   1   1   32.40    6.00
   1   1  -1   50.09   10.50
   1   1  -1   65.89   10.60
   1   1  -1   46.70    6.60
   1   1  -1   44.40    7.50
   1   1  -1   47.50    8.90
   1   1  -1   49.10    6.50
  -1  -1  -1   66.69    8.10
  -1  -1  -1   59.29    9.10
  -1  -1  -1   66.69   11.00
  -1  -1  -1   72.79    8.70
   1  -1   1   61.59    7.60
  -1  -1  -1   37.60    9.10
  -1  -1  -1   85.49   13.40
   1   1   1   71.49    8.20
   1   1   1   85.89   13.70
  -1   1  -1   41.10    8.10
   1   1   1   52.59   11.80
   1   1   1   79.49    8.50
   1   1   1   74.29   11.10
   1   1   1   74.99    9.30
   1   1   1  102.09   10.90
   1   1   1   89.49    9.90
   2  -1   1   87.19   21.00
  -2  -1  -1  119.99   13.20
   2  -1   1  124.79   14.80
   2  -1   1  156.78   21.40
   2  -1   1  151.48   18.30
  -2  -1  -1  122.19   14.30
  -2  -1  -1  134.59   18.00
   2  -1   1  116.39   13.70
  -2  -1  -1  133.59   18.30
   2  -1   1  174.08   22.10
  -2  -1  -1  126.19   14.10
   2  -1   1  123.39   15.20
  -2  -1  -1   99.29   14.10
  -2  -1  -1  136.99   19.10
   2  -1   1  136.19   14.00
  -2  -1  -1  134.29   22.60
  -2  -1  -1  150.38   18.00
   2  -1   1  103.79   14.20
  -2   1  -1  134.89   18.30
   2   1   1  174.88   22.60
  -2   1  -1  141.59   20.10
   2   1   1  163.58   19.30
  -2   1  -1  102.89   13.80
   2   1   1  114.99   13.70
  -2   1  -1  107.59   14.20
   2   1   1  122.79   14.00
   2   1   1  117.99   14.70
  -2   1  -1  128.09   13.80
   2   1   1  112.29   14.60
  -2   1  -1  111.39   13.60
  -2   1  -1  107.69   14.50
  -2   1  -1  141.99   16.40
   2   1   1  103.49   14.10
   2   1   1  174.68   23.90
   2   1   1  151.28   19.70
  -2   1  -1  134.39   16.40
   3  -1   1    8.00    9.90
   3  -1   1   13.00   14.10
   3  -1   1   30.30   16.40
  -3  -1  -1   28.80    9.20
   3  -1   1   20.70   11.40
  -3  -1  -1   34.20   13.10
  -3  -1  -1   24.80   10.10
  -3  -1  -1   20.70   10.60
   3  -1   1   32.30   11.80
  -3  -1  -1   31.60   13.30
  -3  -1  -1   30.10   16.80
  -3  -1  -1   34.10   14.90
   3  -1   1   20.90   10.40
   3  -1   1   43.00   11.50
  -3  -1  -1   38.00   12.00
   3  -1   1   40.60   10.80
   3  -1   1   43.90   12.30
   3  -1   1   20.60    8.60
  -3  -1  -1   29.20    9.60
  -3   1  -1   46.40   10.60
  -3   1  -1   19.50   12.00
   3   1   1   34.70   16.30
  -3   1  -1   17.70   10.40
  -3   1  -1   23.10   12.70
   3   1   1   38.50   11.60
   3   1   1   31.20   21.60
   3   1   1   -3.50   12.40
   3   1   1   23.00   10.10
  -3   1  -1   31.20   10.40
   3   1   1   30.70   10.60
  -3   1  -1   32.90   11.60
  -3   1  -1   21.90   13.40
   3   1   1   39.60   10.30
  -3   1  -1   36.70   16.50
  -3   1  -1   22.50   16.10
   3   1   1   40.30   10.20
  -3   1  -1   37.70   10.50
  -4  -1  -1   16.20   15.80
  -4  -1  -1    2.70    8.80
  -4  -1  -1   28.70   13.60
  -4  -1  -1   23.90   10.90
  -4  -1  -1   33.20   10.40
  -4  -1  -1   26.80   15.10
  -4  -1  -1   17.40   12.40
   4  -1   1   14.90   14.30
  -4  -1  -1   15.00    8.40
   4  -1   1   25.90   10.40
   4  -1   1    8.50    9.60
   4  -1   1    7.30    8.80
   4  -1   1   16.10   12.10
   4  -1   1    1.00    8.80
   4  -1   1    4.50    8.60
  -4  -1  -1   28.80   10.50
  -4  -1  -1    2.70   10.20
   4  -1   1   23.70   10.00
   4  -1   1   14.60   10.30
   4   1   1   25.00    9.50
  -4   1  -1    9.30    9.30
  -4   1  -1    7.50    8.80
  -4   1  -1    4.80    8.70
   4   1   1   30.50   12.00
   4   1   1    6.70    9.40
   4   1   1   25.30   10.70
  -4   1  -1    2.00   10.10
   4   1   1   22.80   11.10
  -4   1  -1   10.00   10.00
  -4   1  -1   13.30   13.90
  -4   1  -1    1.70   13.60
   4   1   1   10.30   14.00
  -4   1  -1   -2.00    9.20
   4   1   1   20.10   16.40
  -4   1  -1    1.60    3.50
  -4   1  -1   -5.80   11.40
   4   1   1   22.90   15.00
  -4   1  -1   13.30   10.20
   4   1   1   16.90   10.40
  -4   1  -1   16.10    9.40
  -5  -1  -1  964.70   85.39
  -5  -1  -1  936.41   84.39
  -5  -1  -1 1005.70   84.69
   5  -1   1  877.11   85.59
  -5  -1  -1 1059.79   82.89
   5  -1   1 1013.20   81.79
  -5  -1  -1  979.30   84.59
   5  -1   1 1009.70   84.79
   5  -1   1 1015.70   84.69
  -5  -1  -1 1026.60   84.09
   5  -1   1  976.30   81.89
   5  -1   1  979.30   84.99
   5  -1   1  957.60   81.19
  -5  -1  -1  858.91   87.89
  -5  -1  -1  982.80   87.09
   5  -1   1 1005.50   84.79
  -5  -1  -1 1064.19   84.89
   5  -1   1 1031.00   84.79
   5  -1   1  869.01   84.39
  -5  -1  -1  997.40   87.79
   5  -1   1  964.70   86.79
  -5  -1  -1  912.01   85.29
   5  -1   1 1059.59   96.39
  -5   1  -1 1103.49   84.69
   5   1   1  967.60   82.79
   5   1   1  920.71   87.49
   5   1   1  939.61   86.49
   5   1   1  965.50   84.39
   5   1   1  912.41   87.99
   5   1   1 1006.10   83.49
  -5   1  -1  978.20   85.19
   5   1   1 1012.50   84.39
   5   1   1  911.11   83.69
  -5   1  -1 1019.80   84.49
  -5   1  -1  914.21   87.59
  -5   1  -1  883.91   84.59
  -5   1  -1  966.80   83.89
   5   1   1  925.41   84.79
  -5   1  -1 1013.90   84.79
  -5   1  -1  991.30   84.69
   5   1   1  965.60   82.99
  -5   1  -1  894.21   87.09
  -5   1  -1 1048.30   84.59
  -5   1  -1 1080.39   83.19
  -5   1  -1  961.00   79.19
   6  -1   1    3.50    7.50
  -6  -1  -1  -15.10   11.10
  -6  -1  -1    2.20    7.80
   6  -1   1    2.60    6.90
  -6  -1  -1    3.30   14.50
  -6  -1  -1   -4.50   12.90
   6  -1   1   13.20   13.20
   6  -1   1    8.30   11.80
  -6  -1  -1   -4.00    9.90
  -6  -1  -1    4.50   14.40
  -6  -1  -1   -3.80    9.80
   6  -1   1   -8.60   12.40
  -6  -1  -1   -2.80   16.80
   6  -1   1   55.89   39.20
   6  -1   1   -9.00   10.50
   6  -1   1   27.80   15.70
   6  -1   1   -2.20   11.90
  -6  -1  -1  -19.70   15.20
   6  -1   1   19.50    9.80
  -6  -1  -1    9.70   15.30
   6  -1   1    1.90   11.90
  -6  -1  -1    5.70    8.50
  -6   1  -1   25.70   18.30
  -6   1  -1   -1.10   13.10
   6   1   1   18.10   13.70
  -6   1  -1   11.50   12.40
   6   1   1   11.60   15.40
  -6   1  -1   -0.90   14.20
   6   1   1    6.20   10.50
   6   1   1   -0.20   14.30
   6   1   1   -7.80   16.30
  -6   1  -1   11.00   17.90
  -6   1  -1   25.80   14.60
  -6   1  -1    4.50    5.30
   6   1   1   15.10   11.10
   6   1   1    1.40    9.90
  -6   1  -1   12.90   10.60
  -6   1  -1    7.80   14.40
  -6   1  -1    8.20   10.30
  -6   1  -1   -3.10    8.60
  -6   1  -1   -1.80    9.70
  -6   1  -1   16.80   11.70
   6   1   1   -9.70   10.00
   6   1   1    4.10   10.10
  -7  -1  -1  255.57   35.50
   7  -1   1  197.18   30.30
   7  -1   1  176.78   29.20
   7  -1   1  176.58   28.80
   7  -1   1  200.68   22.90
  -7  -1  -1  260.87   39.50
  -7  -1  -1  200.78   23.80
  -7  -1  -1  219.48   28.30
  -7  -1  -1  204.98   24.00
  -7  -1  -1  162.48   28.90
   7  -1   1  209.78   30.40
  -7  -1  -1  238.68   35.30
  -7  -1  -1  245.08   32.60
   7  -1   1  239.68   33.60
  -7  -1  -1  224.48   31.30
   7  -1   1  187.88   33.10
  -7  -1  -1  212.08   26.20
  -7  -1  -1  258.57   37.70
  -7  -1  -1  202.78   28.60
   7  -1   1  223.78   31.20
  -7   1  -1  166.48   29.20
  -7   1  -1  192.98   22.90
  -7   1  -1  255.87   32.70
  -7   1  -1  213.98   35.90
   7   1   1  241.18   36.60
  -7   1  -1  180.68   19.70
   7   1   1  186.48   22.10
   7   1   1  240.88   35.70
  -7   1  -1  229.48   29.80
   7   1   1  305.47   61.29
  -7   1  -1  211.68   26.40
   7   1   1  214.48   31.00
  -7   1  -1  231.68   26.70
   7   1   1  160.58   27.80
  -7   1  -1  270.57   38.70
   7   1   1  208.58   35.10
   7   1   1  233.58   30.90
  -7   1  -1  269.77   32.90
   7   1   1  227.18   30.90
  -7   1  -1  206.48   32.40
  -7   1  -1  230.18   28.00
  -7   1  -1  223.28   31.00
   8  -1   1   31.20   14.60
   8  -1   1   21.20   15.40
   8  -1   1   44.40   19.70
  -8  -1  -1   18.70   15.10
  -8  -1  -1   12.80   11.20
  -8  -1  -1   15.20   14.60
   8  -1   1    8.40   16.20
  -8  -1  -1   -0.80   10.00
   8  -1   1   18.90   13.80
  -8  -1  -1   16.00   11.20
  -8  -1  -1    8.20   11.60
  -8  -1  -1   -6.70   17.40
  -8  -1  -1   14.50   14.00
  -8  -1  -1   -3.30   18.50
  -8  -1  -1   10.60   10.00
  -8  -1  -1   39.40   17.40
  -8   1  -1   39.50   14.60
  -8   1  -1   11.50   14.60
   8   1   1    5.60   17.10
  -8   1  -1    9.40   11.20
   8   1   1    2.50   15.20
   8   1   1   16.50   13.40
  -8   1  -1   31.40   16.50
   8   1   1    4.00   11.20
  -8   1  -1   15.50    6.10
  -8   1  -1    9.50   15.00
  -8   1  -1   36.30   14.80
   8   1   1    9.40   13.80
  -8   1  -1   14.30   14.40
  -8   1  -1   26.10   11.50
  -8   1  -1   25.10   12.60
  -8   1  -1   41.10   20.90
   8   1   1    1.60   16.30
  -8   1  -1   15.20   15.40
  -8   1  -1    7.80   11.10
  -9  -1  -1   34.90   22.70
   9  -1   1    3.30   15.40
  -9  -1  -1   -1.60   16.00
  -9  -1  -1   21.30   17.40
   9  -1   1    5.60   17.40
  -9  -1  -1   19.60   11.50
  -9  -1  -1   12.00   16.50
  -9  -1  -1   17.60   10.00
  -9  -1  -1   13.90   15.30
   9  -1   1   12.90   15.40
  -9  -1  -1   -6.70   13.60
   9  -1   1  -12.60   13.50
  -9   1  -1   10.70   16.00
  -9   1  -1   11.70   18.60
  -9   1  -1    5.90   15.60
   9   1   1   33.40   19.20
   9   1   1   35.30   17.50
   9   1   1    1.70   19.30
  -9   1  -1   -2.90   11.20
  -9   1  -1    5.80    6.40
  -9   1  -1   12.70    7.10
  -9   1  -1    8.90   14.80
   9   1   1   12.40   17.70
   9   1   1  142.59   62.19
   9   1   1   10.20   14.50
  -9   1  -1   -2.00   15.50
  -9   1  -1  -11.00   15.50
   9   1   1   16.90   16.90
  -9   1  -1    4.30   21.00
  -9   1  -1   20.20   22.10
  -9   1  -1   15.60   10.80
 -10  -1  -1   34.00   25.80
 -10  -1  -1    5.50   22.50
  10  -1   1   11.20   19.80
 -10  -1  -1   59.19   23.20
 -10  -1  -1    2.80   16.30
  10  -1   1   21.30   18.20
  10  -1   1   -1.00   17.70
 -10  -1  -1   14.70   12.60
 -10  -1  -1    7.20   17.30
 -10  -1  -1   18.30   11.60
 -10  -1  -1  -20.50   15.40
  10  -1   1    3.70   17.80
 -10  -1  -1   -4.20   17.10
 -10   1  -1   37.20   24.70
  10   1   1   49.70   25.10
 -10   1  -1   17.50    6.60
 -10   1  -1    4.30   15.90
 -10   1  -1   16.30   14.00
 -10   1  -1   22.40   19.30
 -10   1  -1    4.50    6.50
 -10   1  -1   18.30   17.80
  10   1   1   -5.30   13.30
  10   1   1   22.90   17.80
  10   1   1   16.50   17.00
 -10   1  -1   35.00   21.00
  10   1   1   70.19   65.99
 -10   1  -1   53.09   23.80
 -10   1  -1  -11.30   18.40
 -10   1  -1    4.40   18.20
 -11  -1  -1   22.10   22.60
 -11  -1  -1   39.60   28.50
  11   1   1   44.90   27.00
 -12  -1  -1   11.70   22.40
 -12  -1  -1   76.89   29.60
 -12  -1  -1    5.80   19.50
  12  -1   1   30.30   21.90
  12  -1   1   16.80   23.70
 -12  -1  -1   52.39   14.80
  12  -1   1   22.80   25.40
 -12  -1  -1   93.19   31.00
  12   1   1   25.40   25.30
 -12   1  -1   66.49   29.40
  12   1   1   11.70   20.00
 -12   1  -1    1.90   18.90
  12   1   1   44.90   26.90
 -12   1  -1   44.20   26.90
 -12   1  -1   12.50   20.60
  12   1   1   89.19   23.60
 -12   1  -1   45.70   23.50
 -13  -1  -1   -3.90   11.40
 -13  -1  -1    1.50   27.00
  13  -1   1   -0.90   18.70
 -13  -1  -1   37.70   20.30
 -13  -1  -1  -13.00   15.40
 -13  -1  -1  -22.50   17.40
 -13  -1  -1   49.90   29.30
  13   1   1   16.40   23.70
  13   1   1  -12.80   17.40
  13   1   1  -26.00   21.40
 -13   1  -1   30.10   22.70
 -13   1  -1    7.40   22.50
 -13   1  -1   11.30   21.90
 -13   1  -1   45.50   27.80
 -13   1  -1   39.80   25.00
  13   1   1   61.99  109.39
 -14  -1  -1    6.70   11.20
  14  -1   1   20.00   26.40
 -14  -1  -1   21.50   22.90
 -14  -1  -1   -0.50   23.40
 -14  -1  -1   41.90   32.40
 -14  -1  -1  -17.70   18.90
 -14  -1  -1   37.30   28.50
  14  -1   1   47.30   23.80
  14  -1   1   -5.40   19.80
  14  -1   1  -14.80   17.10
 -14   1  -1   15.60   28.60
  14   1   1   61.69   36.30
 -14   1  -1   45.60   22.50
 -14   1  -1   14.30   24.30
 -14   1  -1  -23.30   20.90
 -14   1  -1   -4.20   18.10
  14   1   1    8.00   21.60
 -15  -1  -1   46.40   28.00
  15  -1   1   53.49   30.00
 -15  -1  -1   45.10   35.50
 -15  -1  -1   50.89   26.70
  15  -1   1   37.80   22.80
 -15  -1  -1   68.79   26.00
 -15   1  -1   49.80   30.10
  15   1   1   89.39   39.90
 -15   1  -1    3.60   24.20
 -15   1  -1   36.00   28.50
 -15   1  -1   27.40   39.40
 -15   1  -1   45.10   26.40
 -16  -1  -1    9.30   20.80
 -16  -1  -1   -4.90   23.80
 -16  -1  -1    0.50   24.40
  16  -1   1   42.50   28.10
 -16  -1  -1    8.50   29.00
  16  -1   1  -17.10   27.30
  16   1   1  104.09   42.20
 -16   1  -1   22.20   29.50
 -16   1  -1   12.60   27.40
 -16   1  -1   -7.70   27.90
 -16   1  -1  -20.60   24.90
 -16  -2   1   53.29   28.20
  16  -2  -1  -48.10   24.80
 -16  -2   1   39.90   32.50
  16  -2  -1   13.80   25.90
 -16  -2   1   -5.40   22.40
 -16  -2   1  -26.80   21.80
 -16  -2   1   74.39   39.30
 -16   2   1   57.49   30.50
 -16   2   1  -10.60   20.80
 -16   2   1   13.50   25.90
 -16   2   1  -32.10   26.30
  16   2  -1   -8.90   36.50
  15  -2  -1   52.89   28.50
 -15  -2   1    2.10   21.40
 -15  -2   1   16.40   24.20
 -15  -2   1  -23.00   28.90
 -15  -2   1    5.10   28.10
  15  -2  -1   25.00   27.10
 -15  -2   1   78.29   27.30
 -15   2   1  -40.70   19.10
 -15   2   1   25.50   19.90
  15   2  -1   76.19   33.60
 -15   2   1   42.30   28.00
  15   2  -1   44.80   30.70
 -15   2   1   15.90   23.50
 -15   2   1   17.60   25.20
 -14  -2   1   29.80   24.00
  14  -2  -1   20.50   23.70
  14  -2  -1  -30.90   17.20
 -14  -2   1   38.10   18.20
  14  -2  -1  -10.50   19.80
 -14  -2   1  -35.60   22.20
 -14  -2   1   33.60   22.70
 -14  -2   1   -6.90   17.60
 -14  -2   1   -4.90   24.20
  14  -2  -1  -10.30   15.60
 -14   2   1   10.20   24.80
 -14   2   1   30.40   22.80
  14   2  -1   13.10   21.60
 -14   2   1   13.90   28.60
  14   2  -1    6.90   19.40
  14   2  -1   43.40   37.70
 -14   2   1  -21.00   19.60
  13  -2  -1   29.90   24.90
 -13  -2   1   56.09   21.50
 -13  -2   1   20.30   18.00
  13  -2  -1   27.00   24.40
 -13  -2   1    2.00   19.10
 -13  -2   1    3.60   17.90
 -13  -2   1   53.99   27.30
 -13  -2   1  -24.60   18.80
  13  -2  -1    7.50   21.80
 -13   2   1   19.10   19.70
  13   2  -1   41.00   27.50
 -13   2   1   16.80   14.30
 -13   2   1   31.70   21.60
  13   2  -1  -26.90  107.29
 -13   2   1   67.79   25.60
 -13   2   1   47.30   25.50
 -13   2   1   32.90   21.40
  13   2  -1    4.40   19.90
  13   2  -1   18.40   26.50
  12  -2  -1   33.70   23.50
 -12  -2   1   51.29   25.30
  12  -2  -1    1.00   13.90
 -12  -2   1   -3.20   21.40
 -12  -2   1  -20.70   15.20
 -12  -2   1   35.60   23.70
 -12  -2   1  -13.30   13.00
  12  -2  -1    8.80   19.90
 -12  -2   1   -2.40   19.20
 -12  -2   1    5.20   19.00
 -12  -2   1   16.60   15.20
  12  -2  -1   39.50   23.30
  12   2  -1  139.99  105.19
 -12   2   1   22.60   20.40
 -12   2   1   17.80   21.20
 -12   2   1   17.10   17.40
  12   2  -1   11.50   19.10
  12   2  -1  -16.70   27.00
 -12   2   1   -8.30   15.50
 -12   2   1   26.80   15.70
 -12   2   1   35.70   19.40
 -12   2   1   14.70   22.10
 -11  -2   1   35.90   19.80
 -11  -2   1   36.00   18.20
 -11  -2   1   50.39   24.50
  11  -2  -1   29.10   20.30
  11  -2  -1   23.90   19.70
 -11  -2   1   22.60   19.10
 -11  -2   1   28.40   16.50
  11  -2  -1   26.40   16.20
  11  -2  -1   18.40   19.20
  11  -2  -1   -1.10   15.70
 -11  -2   1   23.10   15.70
 -11  -2   1   30.60   25.40
 -11  -2   1   17.40   12.40
 -11   2   1    9.40   16.70
 -11   2   1   20.50   15.00
 -11   2   1   10.00   16.10
 -11   2   1   13.20   17.70
  11   2  -1   -5.60   20.10
 -11   2   1    4.10   21.70
 -11   2   1    7.30   19.40
 -11   2   1   46.50   19.00
 -11   2   1    1.20   19.90
 -11   2   1    9.00    9.70
  11   2  -1   20.70   28.20
 -11   2   1    3.90    6.30
 -11   2   1   16.90   20.20
 -10  -2   1   40.90   20.00
 -10  -2   1   26.40   15.90
  10  -2  -1   44.30   14.90
 -10  -2   1   16.10   11.70
 -10  -2   1   38.40   24.60
  10  -2  -1   14.20   17.00
  10  -2  -1   -8.30   15.30
 -10  -2   1   33.70   19.40
 -10  -2   1    4.00   19.40
 -10  -2   1   10.10   16.90
  10  -2  -1   15.60   16.20
 -10  -2   1    6.90   14.20
 -10  -2   1   10.20   19.70
  10  -2  -1   40.50   16.60
  10   2  -1    9.50   17.70
 -10   2   1   18.60   18.10
 -10   2   1   17.60   18.40
 -10   2   1   76.59   21.70
 -10   2   1    5.10   12.90
 -10   2   1   -0.30    6.80
 -10   2   1    2.80   15.80
  10   2  -1   19.60   19.60
  10   2  -1   -6.00   26.90
 -10   2   1  -12.60   16.60
  10   2  -1   26.90   18.80
  10   2  -1    1.90   16.30
 -10   2   1   -9.80   12.50
 -10   2   1   32.70   15.50
 -10   2   1   -8.10   17.80
  -9  -2   1   16.30   15.50
  -9  -2   1   13.20   16.00
  -9  -2   1   27.00   17.40
   9  -2  -1   33.30   17.90
  -9  -2   1   44.10   17.00
  -9  -2   1   17.50   21.20
  -9  -2   1   21.90   12.50
   9  -2  -1   25.60   17.70
  -9  -2   1   47.20   18.40
   9  -2  -1   95.79   24.50
  -9  -2   1    2.50   19.10
  -9  -2   1   43.80   17.80
   9  -2  -1   29.50   18.70
   9  -2  -1   62.29   15.50
  -9   2   1   17.20   16.50
  -9   2   1   60.19   21.90
   9   2  -1   46.60   24.80
  -9   2   1   30.30   18.30
  -9   2   1    1.30   13.50
   9   2  -1   26.30   18.30
   9   2  -1   34.60   17.60
   9   2  -1   50.29   71.99
  -9   2   1   21.90   15.80
  -9   2   1   49.80   15.90
  -9   2   1   38.30   10.10
  -9   2   1   46.30   15.90
  -9   2   1   24.50   18.40
  -9   2   1   19.60   13.90
   9   2  -1   20.00   18.70
  -9   2   1   80.39   55.89
   9   2  -1   47.20   15.80
   9   2  -1   31.70   19.40
  -8  -2   1   45.00   17.20
  -8  -2   1   31.30   10.80
  -8  -2   1   22.70   14.00
   8  -2  -1   13.00   14.90
  -8  -2   1   21.70   12.80
  -8  -2   1   16.10   14.40
  -8  -2   1   40.80   14.30
  -8  -2   1    6.10   10.90
   8  -2  -1   33.40   17.40
   8  -2  -1   42.40   13.40
  -8  -2   1   25.00   15.30
  -8  -2   1   64.39   22.60
   8  -2  -1   -0.80   43.20
  -8  -2   1   25.90   14.80
   8  -2  -1   21.50   10.90
  -8  -2   1    7.70   15.20
  -8  -2   1   29.10   19.90
  -8   2   1   39.90   16.90
   8   2  -1   35.10   17.50
  -8   2   1    5.80   14.70
   8   2  -1   13.40   18.80
  -8   2   1   35.90   18.20
  -8   2   1   36.70   12.90
  -8   2   1   19.80   15.60
   8   2  -1  -15.80   10.80
  -8   2   1   28.10   15.00
  -8   2   1   50.29   13.30
  -8   2   1   24.00   15.80
  -8   2   1   33.60   13.80
  -8   2   1   24.80   13.90
   8   2  -1   65.49   50.89
  -8   2   1   31.70   13.30
  -8   2   1   35.70    9.20
   8   2  -1   22.00   16.10
  -8   2   1   42.00   49.00
   8   2  -1   47.00   16.60
  -8   2   1   30.90   12.60
  -7  -2   1   52.09   15.30
  -7  -2   1   76.29   23.20
   7  -2  -1   61.69   20.20
   7  -2  -1   41.40   16.60
  -7  -2   1   34.90   15.30
  -7  -2   1   31.90   13.00
  -7  -2   1   49.40   17.00
   7  -2  -1   31.50   13.50
   7  -2  -1   29.70   14.90
   7  -2  -1   43.40   15.30
   7  -2  -1   63.79   14.70
  -7  -2   1   23.60   13.00
   7  -2  -1   21.10   13.50
  -7  -2   1   35.50   10.30
  -7  -2   1   30.80   14.60
  -7  -2   1   58.09   15.00
  -7  -2   1   15.50   16.50
  -7  -2   1   24.20   14.20
  -7  -2   1   49.70   43.30
  -7   2   1   39.40   15.20
   7   2  -1   59.89   18.60
  -7   2   1   29.80   10.40
  -7   2   1   57.09   42.80
   7   2  -1   38.50   17.80
   7   2  -1   21.20   16.00
  -7   2   1   45.20   13.20
  -7   2   1   34.80   11.40
  -7   2   1   19.20   12.50
   7   2  -1   41.00   13.30
  -7   2   1   46.20   18.00
  -7   2   1   55.39   15.80
  -7   2   1   49.50   17.80
   7   2  -1   29.10   18.50
  -7   2   1   37.70   15.80
  -7   2   1   35.30   14.50
  -7   2   1   21.90   12.00
   7   2  -1   31.20   14.60
  -7   2   1   44.70   16.70
  -7   2   1   23.60   14.40
  -6  -2   1  204.88   24.50
  -6  -2   1  181.28   20.80
  -6  -2   1  201.88   25.80
   6  -2  -1  188.88   23.60
   6  -2  -1  221.88   29.30
  -6  -2   1  143.49   49.30
   6  -2  -1  196.98   27.30
  -6  -2   1  239.78   30.10
  -6  -2   1  186.08   23.90
  -6  -2   1  180.48   23.30
  -6  -2   1  202.68   26.50
  -6  -2   1  180.48   17.80
  -6  -2   1  194.68   32.60
   6  -2  -1  186.38   23.60
   6  -2  -1  218.88   32.30
  -6  -2   1  205.28   26.70
   6  -2  -1  220.78   29.60
   6  -2  -1  198.08   24.10
  -6  -2   1  198.18   18.40
  -6  -2   1  140.39   26.40
  -6  -2   1  207.58   33.90
  -6  -2   1  199.08   25.10
   6   2  -1  178.38   25.50
  -6   2   1  187.98   20.80
  -6   2   1  208.68   29.40
  -6   2   1  238.58   31.80
  -6   2   1  197.08   21.70
  -6   2   1  212.68   25.00
  -6   2   1  191.58   24.40
   6   2  -1  199.98   33.30
   6   2  -1  205.48   30.40
  -6   2   1  105.99   48.70
  -6   2   1  231.48   30.30
  -6   2   1  182.98   27.00
  -6   2   1  197.28   27.80
  -6   2   1  199.28   23.30
   6   2  -1  152.88   27.40
  -6   2   1  185.38   28.50
  -6   2   1  202.08   23.90
   6   2  -1  152.48   25.90
   6   2  -1  196.68   31.10
  -5  -2   1  136.19   22.80
  -5  -2   1  124.69   25.60
  -5  -2   1  195.68   15.80
   5  -2  -1  106.49   19.80
  -5  -2   1   94.19   25.80
   5  -2  -1  250.07   27.50
   5  -2  -1  188.48   27.40
  -5  -2   1  117.29   24.90
  -5  -2   1  140.69   17.00
   5  -2  -1  159.98   19.90
   5  -2  -1  131.99   22.10
  -5  -2   1  139.79   50.09
  -5   2   1  106.09   21.70
  -5   2   1  138.79   22.50
   5   2  -1  151.58   54.29
   5   2  -1  117.69   28.50
  -5   2   1  201.78   21.60
   5   2  -1  149.39   17.30
  -5   2   1  188.48   18.10
  -5   2   1  113.09   22.00
   5   2  -1  101.19   23.00
  -5   2   1  184.38   21.50
  -5   2   1  144.19   22.80
  -5   2   1   79.19   19.10
  -5   2   1  181.28   51.19
   5   2  -1  220.78   26.20
  -4  -2   1  158.58   21.40
  -4  -2   1  171.48   26.00
  -4  -2   1  187.88   24.30
  -4  -2   1  159.58   19.60
  -4  -2   1  179.38   28.40
   4  -2  -1  128.19   16.80
  -4  -2   1  183.68   22.50
  -4  -2   1  168.78   23.60
   4  -2  -1  164.18   20.90
  -4  -2   1  128.99   17.40
   4  -2  -1   97.79   19.30
  -4  -2   1  156.58   25.30
   4  -2  -1  147.49   20.60
   4  -2  -1  136.69   20.90
  -4  -2   1  121.69   15.40
  -4  -2   1  139.89   15.50
  -4  -2   1  169.88   18.00
   4  -2  -1  232.98   26.70
  -4   2   1  174.88   24.20
   4   2  -1  185.38   26.70
   4   2  -1   77.89   49.00
  -4   2   1  134.29   18.10
  -4   2   1  166.68   23.30
   4   2  -1  156.18   25.30
  -4   2   1  182.08   20.30
  -4   2   1  136.59   16.20
  -4   2   1  132.59   16.00
  -4   2   1  182.68   22.30
  -4   2   1  162.38   19.40
   4   2  -1  133.49   16.40
  -4   2   1  188.68   41.00
  -4   2   1  133.29   21.90
  -4   2   1  147.19   24.00
  -4   2   1  162.88   20.10
   4   2  -1  115.99   25.70
   4   2  -1  172.08   22.40
   4   2  -1  171.98   21.00
   4   2  -1  137.59   22.80
   4   2  -1  162.48   18.70
  -4   2   1  136.39   16.40
  -3  -2   1   53.49    8.50
   3  -2  -1   64.59   11.40
  -3  -2   1   73.89   15.70
  -3  -2   1   82.59   12.00
  -3  -2   1   46.90   40.60
   3  -2  -1   64.39   15.20
  -3  -2   1   83.49   11.80
   3  -2  -1   46.90   13.90
   3  -2  -1   75.29   17.00
  -3  -2   1   78.39   19.50
   3  -2  -1   57.69   12.90
  -3  -2   1   81.29   18.10
  -3  -2   1  111.59   14.30
   3  -2  -1   69.09   13.20
   3  -2  -1   67.69   12.90
  -3  -2   1   60.99   16.60
  -3  -2   1   53.49   17.50
  -3  -2   1   83.09   13.80
  -3  -2   1   84.89   14.10
  -3   2   1   76.79   16.50
  -3   2   1   96.19   16.20
  -3   2   1   46.40   14.80
   3   2  -1  104.99   12.80
  -3   2   1   20.40   12.80
  -3   2   1   48.90   11.70
   3   2  -1   63.89   40.80
   3   2  -1   69.49   20.40
   3   2  -1  100.29   22.10
   3   2  -1   90.89   12.70
   3   2  -1   58.69   18.90
  -3   2   1   64.89   10.20
  -3   2   1   68.09   12.90
   3   2  -1   88.09   11.70
  -3   2   1   54.99   11.00
  -3   2   1   58.19   27.50
   3   2  -1   96.59   14.50
  -3   2   1   98.79   14.20
  -3   2   1   56.39   11.60
   3   2  -1   89.29   16.60
  -3   2   1   45.20   16.00
  -2  -2   1  214.08   18.60
   2  -2  -1  176.38   19.90
   2  -2  -1  173.48   22.40
   2  -2  -1  208.68   17.80
  -2  -2   1  202.88   26.00
  -2  -2   1  156.48   19.70
   2  -2  -1  205.88   20.80
   2  -2  -1  254.07   27.20
  -2  -2   1  216.98   20.40
  -2  -2   1  178.08   16.50
  -2  -2   1  230.08   28.50
  -2  -2   1  179.58   23.30
  -2  -2   1  213.78   21.50
   2  -2  -1  195.18   18.20
  -2  -2   1   98.59   43.00
  -2  -2   1  213.28   27.30
   2  -2  -1  201.58   20.40
  -2  -2   1  175.28   19.40
   2  -2  -1  204.38   20.60
   2  -2  -1  206.48   20.60
  -2  -2   1  254.97   27.10
   2   2  -1  183.78   18.30
   2   2  -1  183.78   23.30
  -2   2   1  172.48   19.60
  -2   2   1  187.88   20.40
   2   2  -1  180.08   23.40
  -2   2   1  190.58   20.70
  -2   2   1  179.68   22.60
  -2   2   1  189.58   24.60
   2   2  -1  210.98   24.30
   2   2  -1  200.58   20.40
  -2   2   1  181.28   18.40
   2   2  -1  234.88   20.60
  -2   2   1  230.28   20.80
   2   2  -1  203.78   27.20
   2   2  -1  269.27   30.00
  -2   2   1  167.08   18.80
   2   2  -1  192.38   19.40
  -2   2   1  206.68   31.90
  -2   2   1  205.38   20.50
  -1  -2   1  978.30   83.49
   1  -2  -1 1063.09   81.49
   1  -2  -1 1073.69   79.99
  -1  -2   1 1025.60   81.29
   1  -2  -1 1054.39   83.59
   1  -2  -1  976.10   81.69
   1  -2  -1 1046.40   81.09
  -1  -2   1  978.70   82.79
   1  -2  -1 1129.49   80.99
  -1  -2   1 1009.90   82.29
   1  -2  -1 1063.09   81.59
   1  -2  -1 1094.29   81.49
  -1  -2   1  883.51   81.49
   1  -2  -1  922.01   80.19
  -1  -2   1  970.50   84.29
  -1  -2   1  898.01   80.09
   1  -2  -1  953.80   83.19
  -1  -2   1  926.11   81.29
  -1  -2   1 1004.60   84.99
   1  -2  -1 1093.89   82.99
   1  -2  -1  956.50   81.59
  -1  -2   1 1015.40   83.59
  -1   2   1  968.80   80.29
  -1   2   1  962.90   80.89
   1   2  -1  973.70   83.69
   1   2  -1 1025.70   81.19
   1   2  -1  938.11   83.49
  -1   2   1 1121.69   81.59
  -1   2   1 1065.49   81.19
  -1   2   1 1017.50   83.49
   1   2  -1  821.22   89.59
  -1   2   1  988.70   82.09
   1   2  -1  974.00   81.89
  -1   2   1  941.51   82.99
   1   2  -1 1038.50   84.69
  -1   2   1 1003.40   81.89
   1   2  -1  921.41   80.09
  -1   2   1 1033.50   82.79
   1   2  -1  949.60   82.79
   1   2  -1  956.00   81.99
   1   2  -1  935.71   81.09
   1   2  -1  987.60   84.39
  -1   2   1 1099.99   81.59
  -1   2   1  906.81   79.79
  -1   2   1  963.60   80.79
   0  -2   1  257.17   26.50
   0  -2  -1  220.98   20.40
   0  -2   1  254.77   26.00
   0  -2   1  266.37   22.00
   0  -2  -1  214.78   25.00
   0  -2   1  247.38   22.60
   0  -2   1  255.97   23.00
   0  -2  -1  189.58   20.10
   0  -2  -1  233.08   22.60
   0  -2  -1  214.58   23.00
   0  -2  -1  227.08   20.60
   0  -2   1  265.77   25.60
   0  -2  -1  219.88   21.30
   0  -2   1  277.87   23.60
   0  -2  -1  214.68   25.20
   0  -2  -1  211.68   22.80
   0  -2  -1  200.18   22.50
   0   2  -1  253.17   23.40
   0   2   1  209.58   21.90
   0   2   1  223.78   22.40
   0   2  -1  255.97   22.70
   0   2   1  192.58   19.80
   0   2   1  211.48   21.20
   0   2   1  188.38   20.20
   0   2  -1  263.27   26.70
   0   2  -1  284.17   24.20
   0   2   1  247.98   23.20
   0   2  -1  259.87   26.20
   0   2   1  204.68   24.10
   0   2   1  260.97   21.10
   0   2  -1  296.27   22.20
   0   2   1  222.18   23.40
   0   2   1  211.68   24.70
   0   2  -1  244.98   24.80
   1  -2   1 2176.38  183.58
  -1  -2  -1 2119.39  185.28
  -1  -2  -1 2211.38  180.98
   1  -2   1 2334.77  185.68
   1  -2   1 2327.87  182.68
  -1  -2  -1 2061.19  182.38
   1  -2   1 2345.07  182.98
   1  -2   1 2222.58  184.48
  -1  -2  -1 2464.65  184.78
   1  -2   1 2390.26  183.08
   1  -2   1 2432.06  186.38
   1  -2   1 2185.28  182.18
  -1  -2  -1 2262.47  183.08
   1  -2   1 2056.69  182.18
   1  -2   1 2318.27  183.08
   1  -2   1 2227.98  182.08
  -1  -2  -1 2237.68  182.28
  -1  -2  -1 2254.27  183.78
  -1  -2  -1 2313.67  182.48
  -1  -2  -1 2421.56  186.28
  -1  -2  -1 2372.46  184.58
   1   2   1 2376.26  183.88
  -1   2  -1 2214.38  184.78
   1   2   1 2259.07  185.58
  -1   2  -1 2286.97  182.78
  -1   2  -1 2152.98  182.18
  -1   2  -1 2358.06  182.18
  -1   2  -1 2429.26  186.58
  -1   2  -1 2546.95  182.78
   1   2   1 2420.56  182.78
   1   2   1 2268.47  184.58
   1   2   1 2401.66  182.38
   1   2   1 2223.38  182.38
  -1   2  -1 2506.95  183.18
  -1   2  -1 2195.98  182.88
  -1   2  -1 2188.78  183.58
   1   2   1 2165.78  185.38
   1   2   1 2198.28  184.38
  -1   2  -1 1988.50  182.08
   1   2   1 2352.46  183.18
  -1   2  -1 2109.59  185.58
   1   2   1 2126.99  180.98
   2  -2   1  207.78   20.40
   2  -2   1  208.18   26.20
   2  -2   1  182.78   22.70
   2  -2   1  186.68   17.90
  -2  -2  -1  172.58   19.60
   2  -2   1  175.78   23.40
  -2  -2  -1  183.08   21.80
  -2  -2  -1  216.88   29.40
  -2  -2  -1  208.98   20.90
  -2  -2  -1  174.58   23.30
   2  -2   1  227.78   28.60
   2  -2   1  196.48   20.80
  -2  -2  -1  202.78   28.80
   2  -2   1  185.38   22.20
  -2  -2  -1  182.98   24.40
   2  -2   1  196.08   21.30
  -2  -2  -1  174.18   20.90
  -2  -2  -1  168.38   19.00
  -2   2  -1  199.98   25.30
  -2   2  -1  220.68   21.10
   2   2   1  207.38   26.60
   2   2   1  206.68   27.20
   2   2   1  215.98   24.30
   2   2   1  229.08   29.80
  -2   2  -1  194.18   20.60
   2   2   1  244.28   28.20
   2   2   1  202.28   20.00
   2   2   1  162.18   20.20
  -2   2  -1  212.88   25.90
   2   2   1  203.28   20.20
  -2   2  -1  181.38   25.00
  -2   2  -1  208.58   20.30
  -2   2  -1  189.28   20.90
  -2   2  -1  185.98   18.00
   2   2   1  187.58   19.00
   3  -2   1 1168.78   97.69
   3  -2   1 1137.59   91.89
   3  -2   1 1094.79   93.89
   3  -2   1 1007.40   93.69
   3  -2   1  973.50   93.89
  -3  -2  -1 1150.08   94.79
   3  -2   1 1070.69   93.99
  -3  -2  -1 1346.67   94.29
   3  -2   1 1102.99   96.79
   3  -2   1 1174.48   94.19
   3  -2   1 1157.18   94.69
  -3  -2  -1 1167.68   99.09
  -3  -2  -1 1165.58   96.69
  -3  -2  -1 1182.08   94.59
  -3  -2  -1 1118.99   93.39
  -3  -2  -1 1198.78   97.69
  -3  -2  -1 1057.29   90.79
  -3  -2  -1 1187.98   94.79
   3   2   1 1158.58   94.29
  -3   2  -1 1021.70  104.09
   3   2   1 1004.50   96.39
   3   2   1 1350.16   95.09
   3   2   1 1066.29   94.29
   3   2   1 1043.40   90.49
  -3   2  -1 1079.59   94.49
  -3   2  -1 1031.40   89.99
  -3   2  -1 1184.68   94.09
  -3   2  -1 1065.69   97.49
  -3   2  -1 1004.20   93.79
  -3   2  -1 1133.29   93.89
   3   2   1 1127.19   95.79
   3   2   1 1279.37   93.89
  -3   2  -1  921.41   96.09
   3   2   1 1224.68   98.69
  -3   2  -1 1276.77   94.69
   3   2   1 1230.68   98.79
   4  -2   1  360.26   35.90
  -4  -2  -1  366.06   36.10
   4  -2   1  403.46   40.80
  -4  -2  -1  420.46   35.90
  -4  -2  -1  394.96   34.80
   4  -2   1  388.56   40.50
   4  -2   1  341.27   35.80
  -4  -2  -1  387.06   42.50
  -4  -2  -1  344.77   39.70
  -4  -2  -1  344.17   35.10
  -4  -2  -1  336.17   37.60
   4  -2   1  380.26   39.10
   4  -2   1  382.56   36.40
   4  -2   1  288.87   33.90
   4  -2   1  329.07   33.60
   4  -2   1  400.56   36.10
  -4  -2  -1  368.46   38.50
  -4  -2  -1  429.36   35.90
  -4  -2  -1  291.97   35.30
  -4   2  -1  383.56   41.00
   4   2   1  348.07   34.50
  -4   2  -1  371.86   35.70
  -4   2  -1  373.06   37.00
   4   2   1  307.27   36.10
  -4   2  -1  334.17   39.70
   4   2   1  256.47   37.90
  -4   2  -1  405.46   36.10
  -4   2  -1  291.47   35.20
  -4   2  -1  443.56   36.40
   4   2   1  324.27   36.70
  -4   2  -1  319.07   37.40
   4   2   1  249.78   58.39
  -4   2  -1  372.86   36.50
   4   2   1  404.76   42.00
   4   2   1  370.36   41.60
   4   2   1  348.57   35.30
  -4   2  -1  410.56   36.70
   4   2   1  342.17   34.80
   4   2   1  390.66   35.60
  -4   2  -1  397.76   35.30
   5  -2   1   38.60   17.60
   5  -2   1   42.40   14.80
  -5  -2  -1   50.89   14.40
   5  -2   1   58.39   12.90
   5  -2   1   53.69   15.10
   5  -2   1   60.09   13.50
  -5  -2  -1   48.60   17.50
  -5  -2  -1   86.99   16.80
   5  -2   1   36.50   13.90
  -5  -2  -1   69.49   16.50
  -5  -2  -1   68.19   15.00
  -5  -2  -1   70.19   16.30
   5  -2   1   58.59   14.60
   5  -2   1   48.40   35.80
  -5  -2  -1   79.09   18.50
   5  -2   1   42.60   14.40
   5  -2   1   53.29   18.10
  -5  -2  -1   53.39   22.90
  -5  -2  -1   64.09   13.80
  -5  -2  -1   57.49   19.80
   5   2   1    5.30   18.20
   5   2   1   57.69   15.70
  -5   2  -1   49.40   15.30
  -5   2  -1   71.39   16.00
  -5   2  -1   50.79   19.70
   5   2   1   62.59   14.90
  -5   2  -1   57.09   15.80
  -5   2  -1   67.19   21.50
   5   2   1   68.59   14.90
  -5   2  -1   38.20   17.30
  -5   2  -1   36.10   13.50
   5   2   1   58.79   15.00
   5   2   1   61.19   20.20
  -5   2  -1   36.30   12.20
  -5   2  -1   71.29   14.80
   5   2   1   62.19   14.10
  -5   2  -1   29.80   13.40
   5   2   1   67.09   21.10
   5   2   1   39.70   15.00
  -5   2  -1   54.49   14.00
  -6  -2  -1  275.77   29.60
   6  -2   1  252.77   31.00
  -6  -2  -1  248.28   32.10
  -6  -2  -1  254.17   28.70
  -6  -2  -1  268.07   34.80
   6  -2   1  231.38   30.10
   6  -2   1  258.47   30.40
   6  -2   1  208.78   23.40
  -6  -2  -1  273.27   30.30
   6  -2   1  255.87   24.60
  -6  -2  -1  285.77   31.00
  -6  -2  -1  205.28   32.20
   6  -2   1  256.67   32.60
  -6  -2  -1  292.17   30.30
  -6  -2  -1  319.07   35.90
   6  -2   1  248.08   32.30
  -6  -2  -1  274.97   41.80
   6  -2   1  254.97   31.30
   6  -2   1  218.58   27.80
  -6   2  -1  269.57   29.30
  -6   2  -1  281.87   29.50
  -6   2  -1  292.37   31.70
  -6   2  -1  308.77   40.80
   6   2   1  236.68   29.70
  -6   2  -1  233.78   33.30
   6   2   1  266.97   31.60
   6   2   1  253.07   28.40
  -6   2  -1  306.37   30.70
  -6   2  -1  267.87   39.70
  -6   2  -1  273.77   30.20
   6   2   1  259.87   39.40
  -6   2  -1  259.27   30.60
  -6   2  -1  294.07   30.70
  -6   2  -1  222.98   28.40
  -6   2  -1  238.58   32.30
   6   2   1  290.57   29.60
   6   2   1  256.37   29.30
   6   2   1  258.37   30.00
   6   2   1  318.47   42.80
   6   2   1  286.07   35.50
   7  -2   1   15.30   13.10
  -7  -2  -1   16.90   10.10
   7  -2   1   23.80   15.00
  -7  -2  -1   10.90   17.50
  -7  -2  -1   -6.20   12.00
  -7  -2  -1   12.80   11.30
  -7  -2  -1   17.90   12.80
   7  -2   1    1.40   13.00
  -7  -2  -1   14.30   16.80
  -7  -2  -1   18.60    8.60
  -7  -2  -1   18.90   16.70
   7  -2   1   19.90   12.90
   7  -2   1   43.50   16.10
  -7  -2  -1   32.70   17.90
  -7  -2  -1   23.30   11.30
   7  -2   1   33.60   15.40
   7  -2   1   28.80   13.00
  -7  -2  -1    3.70   11.90
  -7  -2  -1   41.50   13.30
   7   2   1   22.50   17.50
  -7   2  -1    1.50   15.10
  -7   2  -1   18.90   11.60
   7   2   1    3.90   10.50
  -7   2  -1    7.80   10.10
   7   2   1   37.70   13.50
  -7   2  -1   24.80   14.60
   7   2   1    3.50   11.60
  -7   2  -1   -5.30   11.10
  -7   2  -1    5.40   13.50
   7   2   1   -7.40   16.30
   7   2   1   19.80   10.90
  -7   2  -1    9.50   10.40
  -7   2  -1   17.00   11.70
  -7   2  -1    6.60   10.10
  -7   2  -1    7.20   14.80
  -7   2  -1   10.40   16.40
   7   2   1    9.50   11.40
   7   2   1   15.00   18.00
   8  -2   1   42.40   18.60
   8  -2   1   43.40   14.80
  -8  -2  -1   36.40   16.20
  -8  -2  -1   58.09   16.90
  -8  -2  -1   56.09   18.30
   8  -2   1   47.20   20.10
  -8  -2  -1   38.50   20.50
  -8  -2  -1   34.40   22.60
  -8  -2  -1   19.60   15.70
  -8  -2  -1   45.30   15.10
  -8  -2  -1   19.80   21.70
  -8  -2  -1   34.40   11.30
   8  -2   1   37.50   16.20
  -8  -2  -1   64.49   17.40
   8  -2   1   19.60   15.50
  -8  -2  -1   63.09   17.30
  -8  -2  -1   30.50   14.90
   8   2   1   61.39   20.10
  -8   2  -1   37.10   15.10
  -8   2  -1   18.70   14.10
  -8   2  -1   61.79   15.20
   8   2   1   63.89   57.89
  -8   2  -1   64.19   20.80
   8   2   1   35.00   15.80
   8   2   1   36.30   18.10
  -8   2  -1   39.50   15.80
   8   2   1   55.99   18.70
   8   2   1   39.10   11.20
  -8   2  -1   35.00   20.00
  -8   2  -1   69.39   18.10
   8   2   1   26.30   20.90
   8   2   1   45.40   15.90
  -8   2  -1   17.90   20.20
  -8   2  -1   20.70   15.60
  -8   2  -1   57.29   15.60
   8   2   1   53.09   19.20
  -8   2  -1   28.10   11.80
  -9  -2  -1   99.19   24.50
  -9  -2  -1   89.79   16.80
  -9  -2  -1  115.89   31.80
   9  -2   1   33.10   18.00
  -9  -2  -1  140.09   33.30
  -9  -2  -1   54.99   22.50
  -9  -2  -1   86.79   22.60
   9  -2   1   41.60   19.80
   9  -2   1   68.19   20.90
   9  -2   1   68.69   17.70
  -9  -2  -1   92.49   22.80
  -9  -2  -1   65.29   24.30
  -9  -2  -1   95.59   18.40
   9  -2   1  103.89   23.50
   9  -2   1   41.10   19.20
  -9   2  -1   44.40   25.10
   9   2   1   67.09   21.80
  -9   2  -1   39.90   20.40
   9   2   1   76.99   21.90
   9   2   1   66.89   22.60
  -9   2  -1   76.49   22.00
  -9   2  -1  104.19   25.80
   9   2   1   62.69   25.90
   9   2   1  106.69   82.09
  -9   2  -1   89.29   28.10
  -9   2  -1   78.29   25.30
  -9   2  -1   87.29   18.30
   9   2   1   52.69   24.80
  -9   2  -1   54.79   17.60
  10  -2   1  332.37   44.90
 -10  -2  -1  327.67   48.40
 -10  -2  -1  186.08   29.10
 -10  -2  -1  179.48   36.70
 -10  -2  -1  240.78   46.30
 -10  -2  -1  243.78   42.60
 -10  -2  -1  225.38   39.00
 -10  -2  -1  258.37   39.60
  10  -2   1  178.48   34.50
 -10  -2  -1  213.08   27.30
 -10  -2  -1  268.77   40.50
  10  -2   1  260.67   37.50
  10  -2   1  212.48   34.90
 -10   2  -1  265.87   44.80
  10   2   1  209.28   39.50
  10   2   1  169.28   34.70
  10   2   1  189.78   36.50
 -10   2  -1  184.38   37.20
 -10   2  -1  150.48   33.70
 -10   2  -1  329.27   48.50
  10   2   1  254.57   89.39
 -10   2  -1  227.38   39.40
 -10   2  -1  245.68   28.50
 -10   2  -1  228.48   36.20
 -10   2  -1  315.77   42.50
 -11  -2  -1    8.70   33.00
 -11  -2  -1   34.50   22.60
 -11  -2  -1   44.90   21.70
  11  -2   1   41.50   22.40
  11  -2   1   -5.10   20.60
 -11  -2  -1   17.10   19.80
 -11  -2  -1    9.90   14.20
  11  -2   1   16.60   20.90
 -11  -2  -1   15.30   21.60
 -11  -2  -1   13.70   26.10
 -11  -2  -1   27.60   13.90
  11   2   1   29.80   20.80
  11   2   1   22.70   20.60
 -11   2  -1   37.70   23.20
 -11   2  -1   18.10   17.00
 -11   2  -1   64.19   28.10
 -11   2  -1   49.99   15.70
  11   2   1   42.00   30.10
 -11   2  -1   -9.50   21.00
 -11   2  -1   59.89   26.30
 -11   2  -1   28.00   18.40
  11   2   1   51.79   20.80
 -12  -2  -1  -13.00   17.80
  12  -2   1    4.10   18.40
 -12  -2  -1  -12.00   12.50
 -12  -2  -1   20.40   22.50
 -12  -2  -1  -16.10   18.40
 -12  -2  -1    4.20   13.00
 -12  -2  -1   23.20   21.90
  12  -2   1   16.80   21.70
 -12  -2  -1   50.59   27.50
  12  -2   1    7.30   20.00
  12   2   1   41.60   21.50
 -12   2  -1   25.90   23.80
  12   2   1   16.20   23.70
  12   2   1   -0.60   25.60
 -12   2  -1   15.20   22.20
 -12   2  -1   14.10   23.50
 -12   2  -1   15.40   20.90
 -12   2  -1   21.90   21.80
 -12   2  -1   44.30   13.40
 -12   2  -1  -17.00   20.20
  12   2   1  122.99   94.59
 -13  -2  -1   -2.50   19.60
 -13  -2  -1   69.89   34.10
 -13  -2  -1   22.70   25.90
  13  -2   1    2.10   22.80
  13  -2   1    3.60   20.70
 -13  -2  -1   -8.30   15.80
  13  -2   1   17.60   21.80
 -13  -2  -1  -16.70   17.30
  13   2   1   19.70   23.90
  13   2   1   33.60  103.19
 -13   2  -1   21.60   26.40
  13   2   1    8.80   21.20
 -13   2  -1   28.70   20.20
 -13   2  -1   19.20   23.70
  13   2   1    8.70   27.90
 -13   2  -1   -6.60   19.60
 -13   2  -1  -10.60   22.50
  14  -2   1   41.40   26.20
 -14  -2  -1   54.39   26.50
 -14  -2  -1   39.90   26.90
  14  -2   1    9.10   19.20
  14  -2   1   22.40   28.00
 -14  -2  -1   41.30   31.00
 -14  -2  -1   19.70   22.20
  14  -2   1   52.29   26.80
 -14  -2  -1   66.29   34.50
 -14  -2  -1   22.60   16.50
  14   2   1   97.19  121.29
  14   2   1   84.59   35.90
 -14   2  -1   29.30   22.70
 -14   2  -1   40.50   30.50
 -14   2  -1   43.70   23.60
 -14   2  -1   53.69   28.40
 -14   2  -1    4.60   26.30
  14   2   1   36.10   24.70
  15  -2   1   34.50   24.70
  15  -2   1   14.40   21.30
 -15  -2  -1   34.20   27.90
 -15  -2  -1   33.20   28.40
 -15  -2  -1   -6.30   28.60
 -15  -2  -1   37.30   25.70
  15  -2   1   35.80   26.90
 -15   2  -1   37.20   49.80
 -15   2  -1  -23.00   22.30
 -15   2  -1  -21.50   23.70
 -15   2  -1   27.60   27.60
  15   2   1   41.10   36.80
 -15   2  -1   17.40   27.70
 -16  -2  -1   61.09   29.90
  16  -2   1   -8.40   26.60
 -16  -2  -1   28.20   29.40
 -16  -2  -1  -12.10   26.10
  16  -2   1   46.70   25.90
 -16  -2  -1   86.89   34.60
 -16   2  -1   -2.50   28.70
 -16   2  -1   33.20   29.40
 -16   2  -1  104.79   34.70
  16   2   1   53.39   43.40
 -16   2  -1  123.69   34.40
 -16  -3   1  131.09   34.70
 -16  -3   1  114.19   35.70
 -16  -3   1   81.09   32.60
 -16  -3   1   75.99   31.00
 -16  -3   1  122.09   35.50
  16  -3  -1    0.80   28.40
  16  -3  -1   38.70   30.60
  16  -3  -1   79.59   34.90
 -16   3   1   77.39   32.10
 -16   3   1   58.69   30.10
  16   3  -1   71.59   39.80
 -16   3   1   73.59   25.20
 -16   3   1  104.79   32.40
  15  -3  -1    8.00   27.30
  15  -3  -1   21.10   20.00
 -15  -3   1   23.30   21.50
 -15  -3   1   35.90   28.20
  15  -3  -1  -14.40   21.10
 -15  -3   1   32.50   29.50
 -15  -3   1   30.20   26.90
 -15  -3   1   35.00   24.50
 -15   3   1    1.00   18.40
 -15   3   1    4.60   22.20
 -15   3   1    2.30   28.60
 -15   3   1   -4.20   23.10
 -15   3   1   -4.40   21.80
  15   3  -1   36.60   38.60
  15   3  -1  -20.60   26.00
 -14  -3   1   41.00   27.20
 -14  -3   1   28.50   16.20
 -14  -3   1   29.70   26.90
 -14  -3   1   12.40   22.40
 -14  -3   1   44.50   22.70
 -14  -3   1  -18.00   22.70
  14  -3  -1   26.50   16.40
  14  -3  -1   11.70   22.30
  14  -3  -1   40.10   22.70
 -14  -3   1   55.89   25.00
  14  -3  -1   -1.20   19.80
 -14   3   1   46.50   22.60
 -14   3   1    6.20   15.50
  14   3  -1  -18.80   24.60
 -14   3   1    6.60   25.80
  14   3  -1   17.60   22.30
 -14   3   1    2.40   22.10
  14   3  -1   31.20   32.90
 -14   3   1   13.20   25.10
 -13  -3   1   16.40   17.80
 -13  -3   1   38.90   28.00
 -13  -3   1    2.10   22.60
 -13  -3   1  -12.80   15.60
 -13  -3   1   15.70   23.80
  13  -3  -1   49.70   24.90
 -13  -3   1  -41.90   17.00
 -13  -3   1    7.40   15.10
  13  -3  -1    7.70   18.40
 -13   3   1    9.80   15.90
  13   3  -1   19.10   24.70
  13   3  -1   15.00   31.00
 -13   3   1    5.10   20.00
 -13   3   1  -11.20   20.40
 -13   3   1   27.30   22.60
 -13   3   1    8.70   17.50
 -13   3   1   13.00   21.10
  12  -3  -1   73.99   18.30
  12  -3  -1   55.29   24.40
 -12  -3   1   19.40   15.10
 -12  -3   1   16.40   20.20
 -12  -3   1   67.99   22.50
  12  -3  -1   55.19   26.30
 -12  -3   1  103.89   33.00
 -12  -3   1   95.99   28.30
  12  -3  -1   36.60   19.80
 -12  -3   1   59.29   27.20
 -12   3   1   61.39   19.40
 -12   3   1   57.69   23.30
  12   3  -1   92.39   92.99
 -12   3   1   50.69   25.70
 -12   3   1   56.29   25.90
 -12   3   1   72.09   24.40
  12   3  -1   80.79   35.60
  12   3  -1   48.20   26.10
 -12   3   1   34.70   19.80
 -12   3   1   57.89   24.50
  11  -3  -1   17.50   20.10
  11  -3  -1   50.99   18.30
  11  -3  -1    9.10   19.50
 -11  -3   1   44.00   22.10
 -11  -3   1   78.49   30.00
 -11  -3   1   28.50   17.10
 -11  -3   1   12.50   11.60
 -11  -3   1   51.09   20.30
 -11  -3   1   47.00   21.10
  11  -3  -1   32.50   17.40
 -11  -3   1   28.30   23.40
 -11  -3   1   78.09   24.40
 -11   3   1   30.00   20.20
 -11   3   1   28.00   17.70
  11   3  -1   85.19   79.59
 -11   3   1   36.20   22.90
 -11   3   1   31.40   20.00
 -11   3   1   62.49   19.30
  11   3  -1   62.79   21.10
 -11   3   1   58.49   22.40
  11   3  -1    9.40   24.60
 -11   3   1   36.90   21.50
  11   3  -1   24.60   22.00
 -11   3   1   38.70   22.90
  10  -3  -1   -6.10   11.50
  10  -3  -1    2.30   15.80
 -10  -3   1   12.30   20.50
 -10  -3   1   29.00   12.00
 -10  -3   1   31.30   17.00
  10  -3  -1   16.50   13.70
  10  -3  -1   11.20   19.30
 -10  -3   1  -20.20   19.30
 -10  -3   1   14.60   19.00
  10  -3  -1   27.10   19.40
 -10  -3   1    7.50   16.10
  10  -3  -1   16.80   16.60
 -10  -3   1  -12.80   13.50
 -10   3   1   22.40   19.80
 -10   3   1   -1.20   14.30
 -10   3   1  -16.80   17.70
 -10   3   1    8.60   18.40
 -10   3   1   -6.90   20.70
 -10   3   1   41.50   16.30
  10   3  -1   32.80   23.00
  10   3  -1   27.40   24.30
  10   3  -1    4.40   17.70
  -9  -3   1   47.90   20.70
   9  -3  -1   41.30   20.10
  -9  -3   1   39.00   11.90
  -9  -3   1   59.19   19.40
   9  -3  -1   93.09   20.20
  -9  -3   1   84.49   31.10
   9  -3  -1   81.99   22.80
   9  -3  -1   58.19   17.40
  -9  -3   1  117.49   27.40
  -9  -3   1   61.29   21.70
  -9  -3   1   39.90   39.50
  -9  -3   1   69.89   21.90
  -9  -3   1   82.89   24.20
   9  -3  -1   57.49   22.40
   9  -3  -1   73.49   19.10
  -9   3   1   64.49   10.50
  -9   3   1   66.89   16.40
   9   3  -1   40.40   23.30
  -9   3   1   74.29   22.20
  -9   3   1   47.20    9.80
   9   3  -1   37.30   19.20
   9   3  -1   59.59   21.10
  -9   3   1   88.19   25.20
   9   3  -1   38.60   22.80
  -9   3   1   54.79   21.10
   9   3  -1   69.89   18.10
  -9   3   1   58.49   18.90
  -9   3   1   54.09   22.10
  -9   3   1   53.89   22.00
   9   3  -1   60.69   68.19
  -9   3   1   55.89   19.00
  -8  -3   1    6.30   18.70
   8  -3  -1   -6.00   12.10
  -8  -3   1    8.90   14.00
  -8  -3   1   13.70   13.50
  -8  -3   1   -4.20   10.00
   8  -3  -1    5.30   13.30
   8  -3  -1   26.20   13.00
  -8  -3   1   17.40   13.80
  -8  -3   1  -10.40   12.60
   8  -3  -1  -14.80   12.10
  -8  -3   1   -5.40    6.20
   8  -3  -1   -9.30    7.30
   8  -3  -1    0.60    9.70
  -8  -3   1   -7.70   19.70
  -8  -3   1   -8.00    9.80
  -8  -3   1   20.20   16.50
   8  -3  -1   16.70   12.20
  -8  -3   1    7.60   11.90
  -8  -3   1   -0.50    8.80
  -8   3   1   -4.20   13.60
  -8   3   1    2.40   14.60
  -8   3   1   13.60   12.40
  -8   3   1    1.50   11.80
  -8   3   1   -0.50   13.90
  -8   3   1   23.50   15.40
  -8   3   1   10.50   15.50
   8   3  -1  -11.00   12.40
  -8   3   1    8.70   12.00
   8   3  -1  -21.90   52.99
  -8   3   1    5.00    6.50
   8   3  -1   -0.80   13.20
  -8   3   1  -15.00   39.40
  -8   3   1   20.50   14.30
   8   3  -1  -11.00   12.80
   8   3  -1   22.90   21.90
  -8   3   1    8.00   10.10
  -8   3   1   13.70   11.30
  -8   3   1    4.00   10.80
  -8   3   1   -2.80    8.20
  -7  -3   1   11.90    7.50
   7  -3  -1   21.90   15.90
  -7  -3   1   20.40   12.60
  -7  -3   1   -1.50   10.50
  -7  -3   1  -47.90   74.39
  -7  -3   1   31.90   11.90
  -7  -3   1   10.80   14.40
   7  -3  -1   24.30   14.00
  -7  -3   1   27.50   11.20
  -7  -3   1   40.90   20.20
  -7  -3   1    5.90   13.70
  -7  -3   1   32.90   20.30
   7  -3  -1   17.50   15.10
   7  -3  -1   39.30   14.90
  -7  -3   1    7.30   14.20
  -7  -3   1   19.30   14.60
   7  -3  -1   38.00   15.90
  -7  -3   1   32.80   14.20
  -7   3   1   10.60   14.40
  -7   3   1   47.40   19.00
   7   3  -1   45.00   17.60
   7   3  -1   26.20    7.60
  -7   3   1   12.20    9.70
  -7   3   1    4.90   13.00
  -7   3   1   19.40   15.00
   7   3  -1    9.80   12.40
   7   3  -1   18.90    8.70
  -7   3   1   21.90   12.30
   7   3  -1   13.30   18.50
   7   3  -1   12.00   11.10
  -7   3   1   18.40   10.70
  -7   3   1    9.70   10.70
  -7   3   1   14.90    7.60
   7   3  -1   73.19   50.29
  -7   3   1    8.30    9.10
  -7   3   1   19.20   13.70
  -7   3   1   27.90   14.90
  -7   3   1   36.50   14.70
   7   3  -1    2.00   14.40
   7   3  -1   13.10   12.60
  -7   3   1   29.80   13.70
  -6  -3   1  485.45   49.20
  -6  -3   1  506.15   47.10
   6  -3  -1  537.35   49.99
  -6  -3   1  543.55   48.30
  -6  -3   1  480.35   41.80
   6  -3  -1  459.75   47.70
   6  -3  -1  448.36   48.50
  -6  -3   1  460.05   48.70
   6  -3  -1  423.46   43.20
  -6  -3   1  512.95   48.20
  -6  -3   1  558.84   54.39
  -6  -3   1  476.95   43.00
  -6  -3   1  523.95   46.90
  -6  -3   1  438.16   52.19
   6  -3  -1  534.15   49.60
   6  -3  -1  496.65   48.00
  -6  -3   1  510.05   49.60
   6   3  -1  418.76   86.89
  -6   3   1  520.05   46.80
   6   3  -1  506.75   44.10
  -6   3   1  461.65   43.00
   6   3  -1  436.26   44.80
  -6   3   1  460.35   47.60
   6   3  -1  396.86   50.39
  -6   3   1  549.15   50.89
  -6   3   1  545.65   51.69
  -6   3   1  476.25   43.30
   6   3  -1  445.56   50.39
   6   3  -1  525.45   46.70
  -6   3   1  570.74   49.00
  -6   3   1  514.75   48.90
   6   3  -1  553.34   52.59
  -6   3   1  522.25   48.50
  -6   3   1  493.55   47.60
  -6   3   1  432.46   48.30
   6   3  -1  543.25   49.20
  -6   3   1  544.85   48.80
  -6   3   1  497.35   49.60
   6   3  -1  544.25   54.59
  -6   3   1  568.44   48.80
   5  -3  -1   78.29   19.50
   5  -3  -1   54.89   16.70
   5  -3  -1   27.70   13.90
  -5  -3   1   42.50   13.60
  -5  -3   1   27.20   20.30
  -5  -3   1   24.60   14.40
  -5  -3   1   60.29   14.80
  -5  -3   1   49.40   12.60
  -5  -3   1   44.30    8.20
   5  -3  -1   55.79   15.70
   5  -3  -1   39.20   15.00
  -5  -3   1   44.60   17.10
  -5  -3   1   24.90   12.00
   5  -3  -1   29.30    9.00
  -5  -3   1   40.20   10.00
  -5  -3   1   29.60   16.20
  -5  -3   1   67.29   20.90
  -5  -3   1   31.10   20.20
  -5  -3   1   35.30   41.70
   5   3  -1   19.80   10.70
   5   3  -1   12.30   19.40
  -5   3   1   63.69   36.90
  -5   3   1    7.60   13.30
   5   3  -1   35.40   11.10
  -5   3   1   66.69   18.70
   5   3  -1   69.59   19.50
  -5   3   1   52.29   14.90
  -5   3   1   75.79   19.00
   5   3  -1   23.20   14.10
  -5   3   1   32.30   16.00
   5   3  -1   27.20   17.70
  -5   3   1   68.29   21.20
  -5   3   1   45.20   12.40
  -5   3   1   56.99   14.30
  -5   3   1   30.50   10.50
  -5   3   1   49.10   13.50
  -5   3   1   47.20   25.20
   5   3  -1   35.90   13.60
   5   3  -1   32.60   17.50
   4  -3  -1  401.86   36.40
   4  -3  -1  322.57   37.90
   4  -3  -1  376.56   39.90
  -4  -3   1  475.75   39.00
   4  -3  -1  362.16   39.60
  -4  -3   1  407.76   42.90
   4  -3  -1  331.27   38.00
  -4  -3   1  432.76   33.60
  -4  -3   1  430.86   41.70
  -4  -3   1  401.66   37.70
   4  -3  -1  399.96   38.50
  -4  -3   1  433.16   43.60
  -4  -3   1  467.15   37.40
  -4  -3   1  436.66   35.90
  -4  -3   1  450.55   40.80
  -4  -3   1  405.96   41.30
  -4  -3   1  466.15   43.90
  -4  -3   1  386.76   38.60
   4   3  -1  423.56   42.90
   4   3  -1  421.46   37.10
  -4   3   1  363.36   40.30
  -4   3   1  391.96   38.70
  -4   3   1  345.87   37.30
   4   3  -1  407.56   43.50
  -4   3   1  362.36   36.00
  -4   3   1  424.06   38.70
  -4   3   1  354.66   39.40
  -4   3   1  377.76   40.30
  -4   3   1  354.46   56.19
   4   3  -1  407.96   37.10
   4   3  -1  407.76   40.60
   4   3  -1  454.65   35.90
   4   3  -1  382.16   39.60
  -4   3   1  345.77   39.80
   4   3  -1  286.27   67.99
  -4   3   1  398.66   38.40
  -4   3   1  427.36   38.40
   4   3  -1  462.15   39.20
   4   3  -1  384.86   43.70
  -4   3   1  347.27   35.40
   3  -3  -1   18.80   13.60
   3  -3  -1   21.40    9.50
  -3  -3   1   23.30   17.40
   3  -3  -1   25.10   12.50
  -3  -3   1   28.40   13.90
   3  -3  -1   10.20   12.00
  -3  -3   1   10.60   10.20
   3  -3  -1   14.00    9.00
  -3  -3   1   23.70   13.60
  -3  -3   1   16.20    7.70
  -3  -3   1   12.50    3.10
  -3  -3   1   -8.50   13.90
   3  -3  -1    4.30    8.80
  -3  -3   1   13.80   11.70
   3  -3  -1   13.90    8.20
  -3  -3   1   19.00   17.60
   3  -3  -1   13.10    7.40
  -3  -3   1    5.50    8.70
  -3  -3   1   27.50   27.40
  -3  -3   1   20.90    9.80
   3  -3  -1   11.70    6.80
   3   3  -1   29.20    9.30
  -3   3   1   11.50   14.50
  -3   3   1   14.10    9.40
  -3   3   1    9.90    8.00
   3   3  -1    9.60    9.40
  -3   3   1    8.40    8.00
  -3   3   1   13.40   22.50
  -3   3   1    4.50    7.60
  -3   3   1   -0.40    7.30
  -3   3   1   31.60   10.60
   3   3  -1   29.10   17.50
   3   3  -1   19.90   15.50
   3   3  -1   18.50   15.70
   3   3  -1   24.90    8.50
  -3   3   1    8.90   12.20
   3   3  -1   46.40   11.80
   3   3  -1    3.40   12.10
  -3   3   1   15.50   11.40
  -3   3   1  -15.50   12.20
   3   3  -1   -4.30   15.00
   2  -3  -1   47.20   10.70
   2  -3  -1   44.50   11.10
   2  -3  -1   23.00   11.10
  -2  -3   1   24.60   16.80
  -2  -3   1   50.69   55.89
  -2  -3   1   35.50    8.30
  -2  -3   1   19.20   11.20
  -2  -3   1   30.00   17.00
  -2  -3   1   48.90   19.30
   2  -3  -1   54.29    9.60
   2  -3  -1   41.90   17.00
  -2  -3   1   39.90   15.70
   2  -3  -1   37.40   10.50
   2  -3  -1   25.30   10.10
  -2  -3   1   22.00   10.40
  -2  -3   1   30.20   17.40
   2  -3  -1   36.00   15.40
  -2  -3   1   45.50   12.40
   2  -3  -1   23.90   11.00
  -2  -3   1   38.30   10.30
   2   3  -1    9.60   13.40
   2   3  -1   13.90   17.90
   2   3  -1   30.30   17.60
   2   3  -1   48.10   15.50
  -2   3   1   25.00   15.30
  -2   3   1   52.99   11.70
  -2   3   1   30.60   14.20
  -2   3   1   34.60   11.90
  -2   3   1   52.39   12.20
   2   3  -1   28.50    7.80
  -2   3   1   43.90    6.90
   2   3  -1  -23.20   16.30
   2   3  -1   31.40   12.90
  -2   3   1   36.30   10.10
  -2   3   1   44.80   17.10
  -2   3   1   47.80   10.40
   2   3  -1   65.29   11.00
   2   3  -1   30.10   10.40
  -2   3   1   36.30   10.20
   2   3  -1   40.20   20.50
  -2   3   1   25.90   18.00
  -2   3   1   38.10    8.40
  -1  -3   1 8965.60  707.13
   1  -3  -1 9014.70  709.73
   1  -3  -1 8320.07  707.33
   1  -3  -1 8804.52  706.73
   1  -3  -1 7999.60  705.73
  -1  -3   1 9827.42  709.63
   1  -3  -1 9230.28  710.33
   1  -3  -1 8622.54  706.53
   1  -3  -1 8905.81  708.23
  -1  -3   1 8845.32  711.03
  -1  -3   1 8740.43  706.73
  -1  -3   1 9666.83  708.73
   1  -3  -1 8331.57  706.33
  -1  -3   1 9050.00  707.43
   1  -3  -1 8617.54  706.43
  -1  -3   1 8787.02  705.73
   1  -3  -1 8043.90  707.53
  -1  -3   1 9865.81  710.53
   1  -3  -1 9029.70  705.23
  -1  -3   1 8976.30  707.63
  -1  -3   1 9059.09  711.43
   1   3  -1 9999.00  707.13
  -1   3   1 8182.18  705.03
   1   3  -1 9450.25  707.13
  -1   3   1 8517.15  708.33
   1   3  -1 8900.61  709.13
  -1   3   1 8194.08  709.43
   1   3  -1 9155.98  711.73
   1   3  -1 8989.50  708.63
   1   3  -1 9745.72  711.53
  -1   3   1 9387.56  706.83
   1   3  -1 9364.26  707.63
  -1   3   1 8750.42  706.53
   1   3  -1 9511.05  707.93
  -1   3   1 8659.03  706.43
  -1   3   1 8240.98  706.23
   1   3  -1 9228.28  710.13
  -1   3   1 8744.72  709.33
  -1   3   1 7954.10  705.83
  -1   3   1 8023.90  709.23
   1   3  -1 8521.65  705.53
   0  -3  -1  224.98   26.40
   0  -3   1  212.38   26.90
   0  -3  -1  240.78   32.00
   0  -3  -1  285.47   28.00
   0  -3   1  205.58   26.90
   0  -3   1  245.88   28.40
   0  -3   1  192.58   24.10
   0  -3  -1  269.37   29.50
   0  -3  -1  278.27   28.00
   0  -3  -1  259.07   32.20
   0  -3   1  224.18   26.10
   0  -3   1  291.57   34.90
   0  -3   1  264.07   31.40
   0  -3  -1  280.87   25.50
   0  -3   1  246.98   26.20
   0  -3  -1  332.57   25.90
   0  -3   1  303.07   37.30
   0  -3  -1  286.67   24.80
   0  -3  -1  289.87   24.30
   0   3  -1  227.98   25.70
   0   3   1  210.48   23.80
   0   3   1  241.38   23.30
   0   3   1  263.57   30.40
   0   3  -1  236.78   24.70
   0   3   1  310.17   25.60
   0   3   1  254.27   27.00
   0   3  -1  251.47   29.90
   0   3   1  308.37   33.40
   0   3  -1  216.48   28.80
   0   3  -1  276.87   34.70
   0   3  -1  300.37   26.60
   0   3   1  245.28   27.90
   0   3   1  297.37   26.30
   0   3  -1  235.08   27.50
   0   3  -1  252.77   39.00
   0   3  -1  275.47   33.30
   0   3  -1  240.58   30.90
   0   3   1  286.57   29.60
   0   3   1  238.28   31.40
   1  -3   1  357.86   36.90
   1  -3   1  269.97   30.40
   1  -3   1  348.17   38.90
   1  -3   1  308.97   29.80
  -1  -3  -1  351.86   29.50
   1  -3   1  370.06   35.00
  -1   3  -1  294.47   33.10
  -1   3  -1  215.58   30.50
  -1   3  -1  316.87   36.00
  -1   3  -1  410.36   39.70
  -1   3  -1  312.17   30.60
   2  -3   1   49.90   10.40
  -2  -3  -1   70.89   13.30
   2  -3   1   28.30   19.30
  -2  -3  -1   62.29   13.90
  -2  -3  -1   56.19   11.30
  -2  -3  -1   46.00   19.90
   2  -3   1   53.59   19.80
  -2  -3  -1   51.99   18.00
  -2  -3  -1   64.29   21.10
  -2  -3  -1   56.09   12.50
   2  -3   1   50.99   13.00
   2  -3   1   43.00   13.50
   2  -3   1   61.69   18.70
  -2  -3  -1   95.59   22.40
   2  -3   1   34.00   11.20
  -2  -3  -1   49.00    6.50
   2  -3   1   36.50   17.90
   2  -3   1   57.59   10.80
   2  -3   1   42.00   10.40
   2   3   1   27.40   17.40
  -2   3  -1   50.19   12.20
  -2   3  -1   49.99   12.00
   2   3   1   81.59   20.70
  -2   3  -1   40.00   18.80
  -2   3  -1   71.69   20.40
   2   3   1   73.99   12.80
   2   3   1   45.10   13.10
  -2   3  -1   37.30   12.50
  -2   3  -1   34.20   16.80
   2   3   1   32.30   14.90
   2   3   1   65.49   14.80
  -2   3  -1   43.70   10.70
   2   3   1   47.60   17.50
   2   3   1   70.09   21.50
  -2   3  -1   36.50   19.40
  -2   3  -1   56.99   13.80
  -3  -3  -1   12.10   15.70
   3  -3   1   32.00   14.70
  -3  -3  -1   13.00    8.90
  -3  -3  -1   23.80   15.80
   3  -3   1   49.10   21.60
  -3  -3  -1    8.70   18.00
  -3  -3  -1   25.70   10.60
   3  -3   1   20.20    7.20
   3  -3   1   16.00   14.60
  -3  -3  -1   25.60   11.10
  -3  -3  -1   35.80   14.10
   3  -3   1   -7.50   15.90
   3  -3   1   10.10    8.90
   3  -3   1   36.50   12.40
   3  -3   1   30.20   11.10
  -3  -3  -1   28.90    9.80
  -3  -3  -1   25.10   17.90
   3  -3   1   21.30   10.50
  -3   3  -1   36.60   10.30
   3   3   1   86.59   36.70
  -3   3  -1   37.80   10.80
   3   3   1   14.90   12.80
  -3   3  -1   28.10   11.00
  -3   3  -1   23.90   14.00
   3   3   1   42.10   19.70
  -3   3  -1   30.80   18.40
   3   3   1   27.60   12.60
  -3   3  -1   23.30   17.50
   3   3   1   56.19   11.50
   3   3   1   12.90   16.30
  -3   3  -1   19.40    7.10
   3   3   1   13.20   15.60
   3   3   1   14.70    9.70
  -3   3  -1    8.00   16.00
   3   3   1   12.70   14.00
   3   3   1   38.90   11.70
   4  -3   1   33.30   14.10
  -4  -3  -1   -1.00   14.10
  -4  -3  -1   14.50   12.40
   4  -3   1   21.40    7.10
  -4  -3  -1   37.50   16.00
   4  -3   1   20.20   11.00
   4  -3   1   17.10    5.30
  -4  -3  -1   23.60    9.70
   4  -3   1   -1.70   15.80
  -4  -3  -1   11.50    9.70
  -4  -3  -1   23.70   12.70
  -4  -3  -1   17.80   17.80
   4  -3   1    9.50   15.30
  -4  -3  -1   17.50   11.40
  -4  -3  -1   20.00    7.60
   4  -3   1   18.10   11.40
   4  -3   1    8.50   10.10
  -4  -3  -1   42.10   18.40
   4  -3   1   15.60   10.80
   4  -3   1   12.40   12.30
   4   3   1   70.99   37.10
   4   3   1   29.80   10.10
   4   3   1   18.70   19.30
  -4   3  -1    5.30   16.00
  -4   3  -1   18.00   10.00
  -4   3  -1   -5.60   14.00
  -4   3  -1    9.30   11.80
   4   3   1   46.30   20.40
   4   3   1   -0.20   10.50
  -4   3  -1   17.50   11.30
   4   3   1   16.30   10.80
  -4   3  -1   30.80   12.60
  -4   3  -1    4.20   14.70
   4   3   1   16.70    7.40
  -4   3  -1   30.90   11.10
  -4   3  -1   27.50   14.30
   4   3   1   21.40   15.70
  -4   3  -1   14.90    5.40
   4   3   1   10.10   16.10
   4   3   1   16.30   11.10
  -5  -3  -1   15.40   17.00
  -5  -3  -1    7.80   12.40
   5  -3   1   17.00   18.10
  -5  -3  -1   19.40   16.90
  -5  -3  -1   -4.90   11.70
  -5  -3  -1    5.80   14.60
   5  -3   1   41.50   15.00
  -5  -3  -1   16.70   11.80
  -5  -3  -1   39.10   13.60
   5  -3   1   14.20   13.60
   5  -3   1    7.40   11.40
   5  -3   1   22.70    9.10
   5  -3   1   25.80   18.90
  -5  -3  -1   20.90   12.90
   5  -3   1   15.00   12.60
   5  -3   1   16.80   12.70
  -5  -3  -1   16.50   10.40
   5  -3   1   23.40   11.40
  -5  -3  -1    4.50   22.00
   5   3   1    0.30   18.60
  -5   3  -1   34.00   14.80
  -5   3  -1   25.50   12.60
  -5   3  -1   23.10   13.20
   5   3   1   12.80   15.30
  -5   3  -1   24.40   21.50
  -5   3  -1   45.10   14.00
  -5   3  -1   24.20   13.40
   5   3   1   25.50   13.20
   5   3   1    9.70   12.50
   5   3   1   16.70   10.50
   5   3   1   23.30   13.10
  -5   3  -1   25.50   18.70
  -5   3  -1   23.40   16.80
   5   3   1    6.50   18.10
   5   3   1    3.70   17.60
  -5   3  -1   34.00   13.70
  -5   3  -1   23.10   16.30
   6  -3   1  143.59   27.10
  -6  -3  -1  230.58   31.40
   6  -3   1  192.38   29.50
  -6  -3  -1  171.68   29.30
   6  -3   1  213.88   26.70
   6  -3   1  227.58   34.80
  -6  -3  -1  259.97   36.70
   6  -3   1  209.28   29.80
  -6  -3  -1  204.38   21.40
   6  -3   1  198.98   21.70
  -6  -3  -1  228.58   37.90
  -6  -3  -1  214.08   29.40
  -6  -3  -1  178.08   27.20
  -6  -3  -1  205.38   26.20
  -6  -3  -1  229.68   29.50
   6  -3   1  171.28   21.60
   6  -3   1  236.48   34.60
  -6  -3  -1  262.17   36.40
  -6  -3  -1  172.88   36.30
  -6   3  -1  199.28   35.40
   6   3   1  251.07   32.10
  -6   3  -1  245.38   31.00
   6   3   1  218.78   28.20
   6   3   1  202.28   35.60
  -6   3  -1  232.88   37.80
   6   3   1  200.38   25.30
   6   3   1  116.09   63.69
  -6   3  -1  309.67   38.10
   6   3   1  214.48   26.30
  -6   3  -1  202.28   25.70
  -6   3  -1  223.38   27.20
  -6   3  -1  211.08   32.40
   6   3   1  247.08   32.40
  -6   3  -1  220.68   28.40
   6   3   1  264.17   39.90
   6   3   1  253.57   31.90
  -6   3  -1  195.88   25.90
   6   3   1  244.58   37.80
  -6   3  -1  239.48   29.10
  -6   3  -1  204.88   26.20
   7  -3   1   51.29   12.70
   7  -3   1   24.80   15.20
  -7  -3  -1   40.10   20.70
  -7  -3  -1   28.00   22.20
  -7  -3  -1   18.50   11.60
   7  -3   1   17.70   15.00
  -7  -3  -1   69.19   23.60
  -7  -3  -1   41.50   16.80
   7  -3   1   38.70   18.30
  -7  -3  -1   51.69   15.90
  -7  -3  -1   41.30   16.50
   7  -3   1   60.19   17.60
  -7  -3  -1   31.60   18.10
   7  -3   1   38.70   15.30
  -7  -3  -1   31.30    9.70
   7  -3   1   50.79   18.80
  -7  -3  -1   36.50   15.50
  -7   3  -1   45.60   16.20
  -7   3  -1   62.39   17.20
   7   3   1   32.80   14.50
   7   3   1   19.80   14.10
   7   3   1   67.89   49.90
  -7   3  -1   50.89   21.00
  -7   3  -1   32.00   13.80
  -7   3  -1   52.19   15.60
   7   3   1   43.30   21.10
   7   3   1   44.30   19.70
  -7   3  -1   37.70   14.40
  -7   3  -1   58.59   20.90
  -7   3  -1   39.20   16.90
   7   3   1   28.90   12.60
  -7   3  -1   34.80   15.40
   7   3   1   64.99   22.90
  -7   3  -1   39.00   22.40
  -7   3  -1   23.20   16.20
   8  -3   1   15.30   11.70
  -8  -3  -1   -0.80   13.90
  -8  -3  -1    9.20   12.60
  -8  -3  -1    0.70   10.40
   8  -3   1   -1.70   14.90
  -8  -3  -1   -8.30   18.60
  -8  -3  -1   11.10   12.60
   8  -3   1   11.10   14.80
  -8  -3  -1    5.40   14.10
  -8  -3  -1    6.20    8.00
  -8  -3  -1   60.39   18.90
   8  -3   1    0.50   11.80
  -8  -3  -1   14.30   21.30
  -8  -3  -1   43.40   15.70
  -8  -3  -1   20.00   20.00
   8  -3   1   29.70   18.10
   8  -3   1    2.00   11.10
   8  -3   1   33.80   17.10
   8   3   1  -13.40    8.80
  -8   3  -1   12.00   21.60
   8   3   1   22.70   18.20
  -8   3  -1   15.00   19.00
   8   3   1   27.30   62.59
  -8   3  -1   13.70   12.30
  -8   3  -1   15.20   15.70
   8   3   1   -7.40   11.50
   8   3   1   18.40   16.30
  -8   3  -1   13.60   14.10
   8   3   1   23.50   16.90
  -8   3  -1   40.70   16.00
  -8   3  -1   16.20   16.50
  -8   3  -1   16.40   15.10
   8   3   1    7.70   18.40
  -8   3  -1   29.20   12.70
  -8   3  -1    4.40   13.80
   8   3   1   14.80   11.00
   9  -3   1   34.60   14.00
  -9  -3  -1   56.99   26.70
  -9  -3  -1   17.20   20.20
  -9  -3  -1   39.60   17.40
  -9  -3  -1   11.50   25.70
   9  -3   1   11.00   14.20
   9  -3   1   -0.70   13.50
  -9  -3  -1   13.30   18.00
  -9  -3  -1   13.60    9.00
   9  -3   1  -22.90   13.50
  -9  -3  -1   14.10   17.20
   9  -3   1   -5.20   14.40
  -9  -3  -1   11.10   15.20
   9  -3   1    7.60   17.00
   9  -3   1    6.00   13.90
  -9  -3  -1   27.40   20.80
  -9   3  -1   29.80   17.50
   9   3   1   30.40   21.30
  -9   3  -1   35.60   16.60
   9   3   1   64.19   64.49
   9   3   1   18.10   11.40
  -9   3  -1   21.00   19.00
  -9   3  -1   -1.10   17.10
   9   3   1   20.70    9.60
   9   3   1   32.50   17.20
  -9   3  -1   32.20   22.00
  -9   3  -1   26.70   16.40
 -10  -3  -1   34.20   21.90
 -10  -3  -1   34.30   13.30
 -10  -3  -1   39.00   23.00
 -10  -3  -1   41.00   23.60
  10  -3   1   66.39   21.20
  10  -3   1   17.80   19.10
  10  -3   1    5.40   19.50
 -10  -3  -1   61.19   19.30
 -10  -3  -1   -2.00   23.80
  10  -3   1   46.30   17.60
 -10  -3  -1  -11.50   16.00
 -10  -3  -1   52.89   22.30
  10  -3   1   16.80   16.80
 -10   3  -1   77.39   30.00
  10   3   1   41.40   20.70
 -10   3  -1    7.20   22.20
 -10   3  -1   40.80   22.50
 -10   3  -1   61.19   18.20
 -10   3  -1   19.50   20.80
  10   3   1   11.40   22.60
  10   3   1   13.90   23.20
  10   3   1   81.79   72.99
 -10   3  -1   10.30   20.60
 -11  -3  -1   38.70   13.40
  11  -3   1   25.50   22.40
 -11  -3  -1    8.70   27.70
  11  -3   1   69.29   75.99
  11  -3   1   64.59   24.00
 -11  -3  -1   69.59   19.20
  11  -3   1   38.70   20.10
  11  -3   1   46.30   25.30
 -11  -3  -1   49.60   23.30
 -11  -3  -1   -0.20   16.20
 -11  -3  -1   56.09   24.50
  11   3   1    4.90   25.90
 -11   3  -1   16.60   19.10
 -11   3  -1   31.20   22.30
 -11   3  -1   23.50   21.90
 -11   3  -1   45.60   17.70
 -11   3  -1   26.10   17.40
  11   3   1   13.30   74.59
 -11   3  -1   12.40   23.10
  11   3   1   59.29   22.50
 -11   3  -1   42.40   26.30
  12  -3   1   17.70   22.40
 -12  -3  -1   -5.10   12.40
 -12  -3  -1    6.40   19.30
 -12  -3  -1  -25.10   14.00
  12  -3   1  -13.70   18.00
 -12  -3  -1  -19.20   13.00
  12  -3   1   -6.60   16.50
 -12  -3  -1   -2.30   23.50
 -12  -3  -1   18.50   24.40
 -12  -3  -1   15.50   27.60
  12   3   1    0.40   95.39
 -12   3  -1   25.80   21.70
  12   3   1  -51.69   21.10
 -12   3  -1   -6.20   19.40
 -12   3  -1   -2.80   20.90
 -12   3  -1   55.49   24.80
 -12   3  -1   11.80   14.10
 -12   3  -1  -21.80   20.30
  12   3   1   11.60   23.80
 -12   3  -1   -2.70   22.30
  13  -3   1   23.20   20.00
  13  -3   1    5.90   23.30
 -13  -3  -1   40.90   29.50
  13  -3   1  -10.80   18.90
 -13  -3  -1   25.00   17.70
 -13  -3  -1  -24.70   17.40
 -13  -3  -1    5.50   25.00
  13  -3   1  -10.00   18.20
 -13  -3  -1   -5.60   16.10
 -13  -3  -1    4.30   20.70
 -13  -3  -1   -0.20   27.70
 -13   3  -1   28.40   24.40
 -13   3  -1    3.00   23.40
  13   3   1  -22.90   19.90
 -13   3  -1  -13.80   18.20
  13   3   1   17.20   22.60
 -13   3  -1   11.40   15.50
  13   3   1   25.80   33.10
 -13   3  -1    4.10   43.90
 -13   3  -1   16.10   18.60
  14  -3   1   50.49   24.30
 -14  -3  -1    7.40   20.70
 -14  -3  -1   52.29   28.30
 -14  -3  -1   -1.70   20.50
  14  -3   1   37.70   25.80
 -14  -3  -1    9.50   26.90
 -14  -3  -1   22.90   22.60
  14  -3   1   33.90   23.70
 -14  -3  -1   99.19   39.30
  14  -3   1   -4.00   19.50
 -14   3  -1   -5.60   18.60
  14   3   1   21.50   20.50
  14   3   1   73.69   42.40
 -14   3  -1   77.39   30.60
 -14   3  -1   53.29   23.00
  14   3   1   15.70   22.20
 -14   3  -1   30.60   26.10
 -14   3  -1   12.80   19.50
 -15  -3  -1  -20.10   25.20
 -15  -3  -1   23.40   28.50
  15  -3   1   19.20   22.50
  15  -3   1   -2.60   18.70
 -15  -3  -1  106.79   33.20
  15  -3   1   69.49   29.60
 -15  -3  -1    1.30   24.30
  15   3   1   57.39   39.40
 -15   3  -1    2.60   25.80
 -15   3  -1   -2.30   26.80
 -15   3  -1   21.20   23.30
 -15   3  -1   35.70   30.40
  15   3   1    1.90   25.80
 -16  -3  -1    3.90   28.60
 -16  -3  -1   44.40   25.30
 -16  -3  -1   56.49   30.80
 -16  -3  -1  -13.90   32.70
  16  -3   1  -22.70   28.20
  16  -3   1   27.90   26.80
  16  -3   1   42.60   33.50
 -16   3  -1   25.30   28.40
 -16   3  -1   44.70   32.40
 -16   3  -1   49.70   32.40
 -16   3  -1  -12.20   26.00
  16   3   1  -11.50   37.00
 -16  -4   1   58.89   26.40
 -16  -4   1   11.20   24.20
 -16  -4   1   51.99   35.00
 -16  -4   1  -48.40   20.10
 -16  -4   1  -37.70   26.80
  16  -4  -1   -3.20   30.30
  16  -4  -1   16.90   30.80
  16   4  -1   30.00   45.40
 -16   4   1  -32.40   20.30
 -16   4   1   28.00   28.10
 -16   4   1   35.20   30.20
  16   4  -1   25.80   32.80
 -16   4   1   42.20   23.00
 -15  -4   1   29.50   27.60
 -15  -4   1   -5.00   20.90
  15  -4  -1   29.20   28.20
 -15  -4   1   42.30   33.30
  15  -4  -1    0.00   22.80
 -15  -4   1  -28.90   25.70
 -15  -4   1   38.00   22.40
 -15   4   1  -24.40   25.80
 -15   4   1   -2.30   27.00
 -15   4   1    9.50   18.10
  15   4  -1   15.50   27.70
 -15   4   1   26.90   24.50
  15   4  -1   40.50   39.50
 -15   4   1    4.90   20.70
 -15   4   1   28.90   26.50
  14  -4  -1  -29.10   20.30
 -14  -4   1   36.10   28.00
 -14  -4   1   27.00   31.00
 -14  -4   1   -8.00   23.00
  14  -4  -1   -1.70   15.80
  14  -4  -1  -19.70   13.40
 -14  -4   1   -1.40   15.80
 -14  -4   1   -6.10   17.00
  14  -4  -1   -9.10   23.40
 -14  -4   1   23.70   24.00
 -14  -4   1   57.19   20.20
  14   4  -1   12.10   26.40
 -14   4   1   -9.10   19.10
 -14   4   1   36.10   26.20
 -14   4   1    3.30   18.90
  14   4  -1  -27.60   29.30
 -14   4   1    6.90   20.50
 -14   4   1  -33.30   21.80
 -13  -4   1   27.90   22.80
  13  -4  -1   40.40   24.70
  13  -4  -1  -16.50   17.60
  13  -4  -1   -0.40   15.70
 -13  -4   1   15.30   23.50
 -13  -4   1  -14.90   15.10
 -13  -4   1  -38.50   23.30
  13  -4  -1    2.80   22.40
 -13  -4   1   10.00   25.80
 -13  -4   1   21.70   28.20
 -13   4   1   33.00   17.40
  13   4  -1   37.20   25.10
 -13   4   1   21.60   19.20
  13   4  -1  -32.70   27.10
  13   4  -1   64.59   25.50
 -13   4   1  -27.10   17.00
 -13   4   1   20.80   20.10
 -13   4   1   14.80   21.70
 -13   4   1   54.39   25.20
 -12  -4   1  113.39   32.60
 -12  -4   1  191.78   33.20
 -12  -4   1  118.69   34.50
 -12  -4   1  113.99   20.90
 -12  -4   1  193.48   33.60
  12  -4  -1  167.38   35.60
 -12  -4   1  153.98   31.60
 -12  -4   1  125.49   37.80
  12  -4  -1  133.69   34.80
  12  -4  -1  137.29   24.80
 -12  -4   1  117.99   39.30
 -12   4   1  168.58   36.40
 -12   4   1  138.79   29.00
 -12   4   1  190.68   40.30
  12   4  -1  125.99   32.80
  12   4  -1  213.38   39.90
 -12   4   1   95.19   29.40
  12   4  -1  199.68   49.60
 -12   4   1  175.78   35.20
 -12   4   1  115.89   26.60
  12   4  -1  108.69  107.59
 -11  -4   1  105.69   24.70
  11  -4  -1   72.49   18.10
  11  -4  -1   51.49   23.80
  11  -4  -1   36.00   22.90
 -11  -4   1   73.19   25.30
 -11  -4   1   76.69   16.20
 -11  -4   1   43.20   27.00
 -11  -4   1   76.69   31.30
 -11  -4   1   74.79   27.40
  11  -4  -1  103.59   81.09
  11  -4  -1   49.80   24.80
 -11  -4   1   66.99   23.20
  11  -4  -1   90.79   20.40
 -11   4   1   60.49   25.40
 -11   4   1   97.59   28.20
  11   4  -1   89.29   39.80
 -11   4   1   89.19   27.40
  11   4  -1   53.19   25.40
  11   4  -1   41.40   25.60
 -11   4   1   84.09   26.40
 -11   4   1   81.79   23.40
  11   4  -1   60.29   85.49
  10  -4  -1   52.29   22.70
 -10  -4   1   30.40   20.10
 -10  -4   1   28.90   19.90
 -10  -4   1   47.50   18.80
 -10  -4   1   53.89   28.30
 -10  -4   1   37.70   20.70
  10  -4  -1   47.50   17.80
 -10   4   1   42.70   21.80
 -10   4   1   31.10   22.50
  10   4  -1   25.10   24.60
  10   4  -1   37.00   24.60
 -10   4   1   29.20   23.30
 -10   4   1   20.20   21.70
  -9  -4   1  123.59   17.20
  -9  -4   1  110.49   25.40
   9  -4  -1   94.19   23.60
  -9  -4   1  100.99   25.80
   9  -4  -1  131.99   27.40
  -9  -4   1  122.19   35.20
  -9  -4   1   78.99   26.00
  -9  -4   1  124.69   30.70
   9  -4  -1  139.49   29.30
   9  -4  -1  131.59   24.40
   9  -4  -1  122.79   27.30
  -9   4   1  133.29   24.00
  -9   4   1   86.29   25.30
   9   4  -1   83.49   71.19
   9   4  -1   96.19   33.40
  -9   4   1  140.49   30.10
  -9   4   1  122.39   12.40
  -9   4   1  147.59   31.70
  -9   4   1   99.09   12.20
   9   4  -1   89.79   27.70
  -9   4   1  138.59   27.00
  -9   4   1  155.28   30.80
  -9   4   1  151.88   62.09
   9   4  -1  121.19   31.30
  -9   4   1  107.69   28.90
   9   4  -1  101.69   22.80
  -9   4   1  133.19   27.20
  -8  -4   1   43.50   17.00
  -8  -4   1   75.19   12.70
  -8  -4   1   47.10   24.40
  -8  -4   1   42.80   20.30
  -8  -4   1   20.30   14.70
   8  -4  -1   47.60   18.80
  -8  -4   1   74.49   24.30
  -8  -4   1   52.09   21.00
   8  -4  -1   73.49   22.30
   8  -4  -1   48.70   20.30
  -8  -4   1   54.79   16.70
   8  -4  -1   77.79   18.00
  -8  -4   1   53.69   18.70
   8  -4  -1   57.09   20.70
  -8  -4   1   76.49   27.70
   8  -4  -1   65.69   12.50
  -8   4   1   91.89   21.60
  -8   4   1   86.79   19.70
   8   4  -1   60.29   17.20
  -8   4   1   82.59   16.60
  -8   4   1   49.80   21.40
  -8   4   1   64.19   10.70
   8   4  -1   63.39   22.10
  -8   4   1   57.29   22.00
  -8   4   1   72.29   22.60
  -8   4   1   69.79   48.70
   8   4  -1   63.39   12.40
  -8   4   1   50.29   20.50
   8   4  -1   36.30   26.60
   8   4  -1    5.30   61.29
   8   4  -1   56.99   25.90
  -8   4   1  113.39   26.10
  -8   4   1   74.59   22.10
   8   4  -1   50.19   20.10
  -7  -4   1  274.17   31.90
   7  -4  -1  326.77   34.80
  -7  -4   1  196.68   33.90
   7  -4  -1  249.28   25.20
  -7  -4   1  263.27   34.90
  -7  -4   1  374.76   55.39
  -7  -4   1  319.87   47.60
  -7  -4   1  247.28   31.40
   7  -4  -1  324.57   35.50
   7  -4  -1  263.57   33.10
  -7  -4   1  283.67   26.40
   7  -4  -1  313.97   35.30
  -7  -4   1  268.17   31.90
  -7  -4   1  294.47   31.80
   7  -4  -1  267.57   34.50
  -7  -4   1  258.07   25.20
  -7  -4   1  313.57   35.60
  -7   4   1  320.07   30.70
   7   4  -1  243.18   80.39
  -7   4   1  292.27   33.00
  -7   4   1  260.07   37.90
   7   4  -1  272.77   45.30
  -7   4   1  316.07   32.90
   7   4  -1  249.68   28.70
  -7   4   1  274.27   34.90
  -7   4   1  292.07   35.30
  -7   4   1  282.27   33.50
  -7   4   1  313.77   42.90
   7   4  -1  268.97   33.40
  -7   4   1  300.07   36.80
   7   4  -1  291.37   37.20
  -7   4   1  290.67   34.00
  -7   4   1  303.47   27.20
  -7   4   1  358.66   34.30
   7   4  -1  232.88   30.10
  -7   4   1  320.47   54.49
   7   4  -1  228.28   29.20
  -6  -4   1  255.97   27.60
  -6  -4   1  227.68   39.70
  -6  -4   1  206.18   27.10
   6  -4  -1  213.78   31.50
  -6  -4   1  197.78   21.70
  -6  -4   1  149.29   32.90
  -6  -4   1  166.98   19.70
   6  -4  -1  238.88   33.40
  -6  -4   1  147.29   33.40
  -6  -4   1  194.48   24.60
   6  -4  -1  178.58   29.00
  -6  -4   1  274.37   28.40
  -6  -4   1  153.18   30.70
  -6  -4   1  298.67   37.50
   6  -4  -1  178.98   28.60
   6  -4  -1  197.48   32.10
  -6  -4   1  212.28   33.60
   6  -4  -1  163.98   27.00
  -6  -4   1  153.28   28.10
  -6   4   1  252.57   28.10
  -6   4   1  229.98   33.80
  -6   4   1  230.68   34.10
   6   4  -1  235.48   34.20
  -6   4   1  229.78   24.90
  -6   4   1  215.38   29.90
  -6   4   1  213.68   26.50
   6   4  -1  183.18   26.40
   6   4  -1  198.48   37.10
  -6   4   1  257.97   35.50
   6   4  -1  204.58   29.70
  -6   4   1  200.38   34.20
   6   4  -1  284.77   71.79
  -6   4   1  285.07   28.60
  -6   4   1  237.78   65.59
   6   4  -1  208.38   34.70
   6   4  -1  190.68   38.90
  -6   4   1  255.67   34.70
   6   4  -1  234.58   27.80
  -5  -4   1  241.58   34.00
  -5  -4   1  166.58   27.00
   5  -4  -1  162.38   25.70
  -5  -4   1  208.98   25.30
   5  -4  -1  278.97   34.20
   5  -4  -1  296.57   36.60
  -5  -4   1  156.68   22.20
   5  -4  -1  188.38   27.80
  -5  -4   1  242.08   37.00
  -5  -4   1  187.18   32.10
  -5  -4   1  185.98   24.70
  -5  -4   1  268.87   40.20
  -5  -4   1  189.18   64.49
   5  -4  -1  193.28   21.90
   5  -4  -1  229.88   30.10
   5  -4  -1  215.98   32.50
  -5  -4   1  184.68   34.80
  -5  -4   1  206.08   18.20
  -5  -4   1  158.98   22.10
  -5  -4   1  223.28   32.10
   5   4  -1  208.38   23.80
  -5   4   1  216.98   25.90
  -5   4   1  176.58   23.90
   5   4  -1  244.78   33.10
   5   4  -1  268.37   40.10
   5   4  -1  202.08   37.10
   5   4  -1  165.98   59.79
   5   4  -1  178.98   23.50
  -5   4   1  219.68   49.30
  -5   4   1  243.38   34.80
  -5   4   1  252.07   33.90
  -5   4   1  203.28   25.80
  -5   4   1  180.38   30.00
  -5   4   1  202.48   33.40
   5   4  -1  225.48   25.90
   5   4  -1  244.88   33.20
  -5   4   1  226.58   23.40
  -5   4   1  194.58   23.10
  -5   4   1  216.88   31.70
  -5   4   1  195.08   24.90
   5   4  -1  208.08   33.90
   4  -4  -1  118.19   14.50
  -4  -4   1   78.99   18.50
   4  -4  -1  141.59   24.50
  -4  -4   1   91.79   26.30
   4  -4  -1   91.39   18.20
   4  -4  -1  103.09   23.90
  -4  -4   1  111.09   25.50
   4  -4  -1   90.49   17.90
  -4  -4   1   74.79   17.70
  -4  -4   1   82.39   15.50
  -4  -4   1  107.19   22.90
   4  -4  -1  116.19   14.40
  -4  -4   1  158.98   50.99
  -4  -4   1   93.49   27.90
   4  -4  -1  132.49   24.20
  -4  -4   1   87.29   18.20
  -4  -4   1  121.29   25.10
   4  -4  -1  117.39   19.30
   4  -4  -1  130.49   17.60
  -4  -4   1   50.09   16.90
   4   4  -1   90.39   23.30
  -4   4   1   92.09   16.60
   4   4  -1   89.89   18.40
   4   4  -1   92.59   23.70
   4   4  -1   86.69   51.19
  -4   4   1  105.69   18.70
  -4   4   1  105.69   17.10
  -4   4   1  140.39   22.50
  -4   4   1   96.39   34.40
  -4   4   1  133.19   26.00
  -4   4   1   87.79   23.90
   4   4  -1  120.49   27.90
   4   4  -1   91.49   15.60
  -4   4   1   93.49   15.70
  -4   4   1  108.59   19.40
  -4   4   1   97.99   22.00
  -4   4   1   92.99   22.40
   4   4  -1   96.59   23.60
  -4   4   1  115.49   18.90
   4   4  -1  120.19   28.00
   4   4  -1   72.39   16.60
   4   4  -1   86.59   17.00
  -3  -4   1  793.42   79.39
   3  -4  -1  939.41   71.89
  -3  -4   1  829.62   72.79
  -3  -4   1  713.93   74.59
  -3  -4   1  858.91   71.39
  -3  -4   1  751.02   72.79
   3  -4  -1  911.01   72.89
  -3  -4   1  699.63   78.89
   3  -4  -1  888.91   72.99
   3  -4  -1  832.12   73.39
  -3  -4   1  785.82   73.69
   3  -4  -1  934.21   75.89
   3  -4  -1  840.22   76.79
   3  -4  -1  888.91   78.79
  -3  -4   1  830.72   78.19
  -3  -4   1  798.22   75.69
   3  -4  -1  855.21   73.49
  -3  -4   1  951.90   78.99
   3  -4  -1  976.60   72.09
  -3   4   1  831.12   77.29
  -3   4   1  942.41   73.59
  -3   4   1  779.42   77.49
   3   4  -1  786.62   72.69
   3   4  -1  779.02   75.89
   3   4  -1  917.41   71.69
  -3   4   1  869.31   73.89
   3   4  -1  685.93   76.69
   3   4  -1  783.52   77.49
   3   4  -1  801.52   72.69
   3   4  -1  765.32   79.09
  -3   4   1  923.31   71.99
   3   4  -1  915.71   73.69
  -3   4   1  800.22   75.69
  -3   4   1  903.91   73.39
  -3   4   1  822.62   75.39
  -3   4   1  904.01   73.89
  -3   4   1  809.82   72.39
   3   4  -1  816.92   79.49
  -3   4   1  942.21   73.59
   2  -4  -1  263.27   31.40
  -2  -4   1  329.77   32.00
  -2  -4   1  291.07   43.50
  -2  -4   1  314.17   39.30
  -2  -4   1  335.67   37.40
  -2  -4   1  369.96   30.70
  -2  -4   1  357.16   34.30
   2  -4  -1  319.27   36.30
  -2  -4   1  322.67   33.40
   2  -4  -1  326.47   34.20
  -2  -4   1  297.17   32.30
   2  -4  -1  340.97   32.00
   2  -4  -1  349.87   39.40
   2  -4  -1  321.47   37.80
  -2  -4   1  360.26   36.20
  -2  -4   1  247.48   61.09
   2  -4  -1  365.86   32.00
   2  -4  -1  380.16   33.50
  -2  -4   1  346.77   37.60
   2  -4  -1  329.37   31.80
   2  -4  -1  359.86   30.30
  -2   4   1  289.87   31.60
  -2   4   1  258.37   35.20
   2   4  -1  270.37   36.50
   2   4  -1  372.26   34.10
   2   4  -1  333.37   34.40
  -2   4   1  353.66   31.90
  -2   4   1  280.57   29.20
   2   4  -1  333.17   41.10
  -2   4   1  312.57   33.30
  -2   4   1  285.27   35.10
  -2   4   1  298.57   39.70
  -2   4   1  311.07   38.60
   2   4  -1  310.97   35.80
   2   4  -1  384.16   33.40
  -2   4   1  324.77   32.20
   2   4  -1  372.56   31.70
   2   4  -1  292.27   38.30
  -2   4   1  351.16   31.60
   2   4  -1  355.76   32.10
   2   4  -1  313.97   42.50
   2   4  -1  284.07   53.49
  -2   4   1  300.87   29.30
  -1  -4   1  302.57   37.70
  -1  -4   1  211.68   34.60
   1  -4  -1  196.18   26.00
   1  -4  -1  279.37   38.00
   1  -4  -1  304.97   31.40
   1  -4  -1  168.88   26.60
  -1  -4   1  323.97   31.50
   1  -4  -1  212.28   24.10
   1  -4  -1  218.08   33.10
  -1  -4   1  261.37   39.20
  -1  -4   1  283.87   27.90
   1  -4  -1  205.58   30.80
  -1  -4   1  260.77   34.10
   1   4  -1  155.88   33.30
  -1   4   1  285.47   25.70
   1   4  -1  237.98   30.20
  -1   4   1  186.88   35.40
   1   4  -1  189.08   28.60
   1   4  -1  274.97   39.90
  -1   4   1  190.98   35.60
  -1   4   1  187.98   33.80
   1   4  -1  293.27   29.80
  -1   4   1  219.38   25.70
  -1   4   1  173.08   25.80
  -1   4   1  244.28   28.60
   1   4  -1  199.98   32.70
  -1   4   1  225.98   23.50
   1   4  -1  332.97   37.70
  -1   4   1  249.97   29.50
   0  -4  -1  850.11   77.09
   0  -4  -1  950.10   83.19
   0  -4   1 1021.50   81.79
   0  -4  -1 1005.70   81.19
   0  -4  -1  952.20   78.19
   0  -4   1  922.91   78.49
   0  -4   1  841.52   77.19
   0  -4   1  950.00   84.09
   0  -4  -1  974.50   78.49
   0  -4  -1 1029.10   75.29
   0  -4   1  865.21   76.39
   0  -4   1  804.92   77.49
   0  -4   1  903.11   81.29
   0  -4   1  859.41   76.89
   0  -4   1  861.61   74.49
   0  -4  -1  939.61   75.49
   0  -4  -1  915.41   75.59
   0  -4   1  836.82   83.99
   0  -4  -1  860.41   74.39
   0  -4  -1  793.72   82.89
   0  -4  -1  980.60   78.39
   0   4   1  972.70   75.79
   0   4  -1  951.60   76.69
   0   4   1  946.91   78.29
   0   4  -1  799.22   75.89
   0   4  -1 1015.00   76.59
   0   4   1  826.02   80.49
   0   4   1  760.62   74.49
   0   4  -1  775.72   82.99
   0   4  -1  745.83   85.79
   0   4   1  934.41   76.59
   0   4  -1  775.22   77.79
   0   4  -1 1007.90   75.29
   0   4  -1  816.82   78.79
   0   4   1  850.21   73.99
   0   4   1  791.12   76.79
   0   4  -1  844.72   81.29
   0   4  -1  873.41   79.19
   0   4   1  820.52   83.09
   0   4   1  767.92   81.59
   0   4   1  963.20   78.99
   0   4   1 1021.60   75.69
   1  -4   1 5667.43  470.95
   1  -4   1 5192.58  470.25
  -1  -4  -1 6612.54  473.75
  -1  -4  -1 5554.54  476.05
  -1  -4  -1 6213.28  477.15
   1  -4   1 5378.46  470.35
   1  -4   1 5734.93  469.95
  -1  -4  -1 5689.03  471.25
  -1  -4  -1 5959.80  470.25
   1  -4   1 6483.95  475.75
  -1  -4  -1 5545.15  468.25
  -1  -4  -1 5894.71  470.65
  -1  -4  -1 6001.00  472.05
   1  -4   1 5980.90  472.85
   1  -4   1 6240.98  476.65
   1  -4   1 5835.62  476.85
   1  -4   1 6006.40  471.25
  -1  -4  -1 5666.23  470.55
  -1  -4  -1 6278.67  473.75
  -1  -4  -1 6389.46  474.85
   1  -4   1 5850.21  471.25
  -1   4  -1 6523.95  471.35
   1   4   1 5812.12  471.55
  -1   4  -1 6321.57  471.45
   1   4   1 5640.14  472.85
   1   4   1 5544.95  472.45
   1   4   1 6149.48  476.45
  -1   4  -1 6090.79  471.65
  -1   4  -1 5891.01  470.65
  -1   4  -1 5229.98  470.95
  -1   4  -1 5445.36  472.35
   1   4   1 6707.93  471.05
  -1   4  -1 5433.66  475.75
   1   4   1 6755.02  470.55
  -1   4  -1 5390.66  474.35
   1   4   1 5610.04  474.35
  -1   4  -1 5444.06  471.15
   1   4   1 5623.24  468.25
  -1   4  -1 5681.63  476.15
   1   4   1 5555.94  475.85
   1   4   1 6400.66  471.95
  -2  -4  -1   -0.70    7.70
  -2  -4  -1   -2.00    8.70
   2  -4   1   12.00   14.60
   2  -4   1   21.10   10.40
  -2  -4  -1    5.30   10.30
  -2  -4  -1    9.90   18.50
   2  -4   1   -0.80    8.90
   2  -4   1    9.30   10.60
  -2  -4  -1   14.50    9.20
  -2  -4  -1    7.20    3.80
  -2  -4  -1   -7.70   11.10
   2  -4   1   18.50    8.90
  -2  -4  -1    3.90    9.90
   2  -4   1   11.80    7.70
   2  -4   1    5.50   17.50
  -2  -4  -1    3.40   14.50
   2  -4   1   14.00   19.30
  -2  -4  -1   -6.60   16.10
   2  -4   1   -1.00    7.70
   2  -4   1   27.20   10.40
  -2  -4  -1   22.10   15.60
  -2   4  -1   10.60    8.80
   2   4   1   18.20   18.00
  -2   4  -1   16.10    9.30
   2   4   1   34.20   16.80
   2   4   1    3.70   10.80
   2   4   1  -11.90    8.00
   2   4   1   13.50   15.00
   2   4   1    8.90    3.70
   2   4   1   13.00    7.80
  -2   4  -1   23.90   17.40
  -2   4  -1   12.70    8.20
   2   4   1   -9.20   11.80
  -2   4  -1    6.00    9.10
  -2   4  -1   12.60    7.30
  -2   4  -1   -0.30    8.80
  -2   4  -1   19.00   21.00
   2   4   1   13.20   20.10
  -2   4  -1    3.30    8.40
  -2   4  -1   -8.20   13.30
  -2   4  -1  -12.30   13.20
   2   4   1    3.90    9.30
   3  -4   1  203.18   25.00
  -3  -4  -1  228.88   36.60
  -3  -4  -1  273.47   43.60
   3  -4   1  241.28   26.10
   3  -4   1  266.27   32.60
  -3  -4  -1  204.88   23.60
  -3  -4  -1  202.98   27.30
   3  -4   1  245.08   23.50
   3  -4   1  303.87   58.49
   3  -4   1  239.28   29.40
   3  -4   1  248.38   26.10
   3  -4   1  314.17   38.90
  -3  -4  -1  211.78   24.40
   3  -4   1  218.68   24.80
   3  -4   1  216.88   21.50
  -3  -4  -1  199.08   18.80
  -3  -4  -1  263.57   35.20
  -3  -4  -1  179.78   24.50
  -3  -4  -1  321.87   39.10
  -3  -4  -1  212.48   26.50
   3   4   1  203.28   30.60
  -3   4  -1  249.08   25.20
   3   4   1  190.58   32.20
   3   4   1  203.18   25.00
  -3   4  -1  234.68   30.30
  -3   4  -1  241.78   37.60
  -3   4  -1  209.88   23.20
  -3   4  -1  230.58   36.20
  -3   4  -1  275.17   26.10
   3   4   1  206.98   23.60
  -3   4  -1  207.98   25.60
   3   4   1  199.78   24.60
   3   4   1  287.47   33.40
  -3   4  -1  229.08   29.60
  -3   4  -1  269.37   25.70
   3   4   1  228.78   37.70
   3   4   1  244.98   25.30
   3   4   1  175.98   31.10
   3   4   1  135.79   47.80
  -3   4  -1  286.57   25.40
  -4  -4  -1  456.85   46.00
   4  -4   1  415.26   48.60
   4  -4   1  429.66   38.10
  -4  -4  -1  468.35   49.60
   4  -4   1  390.86   42.80
   4  -4   1  450.15   44.40
  -4  -4  -1  519.65   49.30
   4  -4   1  389.86   42.70
   4  -4   1  416.26   42.80
  -4  -4  -1  473.15   40.70
  -4  -4  -1  392.36   52.39
   4  -4   1  504.35   46.00
   4  -4   1  433.46   47.90
   4  -4   1  409.66   42.40
  -4  -4  -1  419.66   43.40
  -4  -4  -1  515.85   55.79
  -4  -4  -1  461.75   42.20
   4  -4   1  412.56   41.60
   4  -4   1  443.06   39.20
  -4  -4  -1  457.35   43.90
   4   4   1  408.96   47.10
   4   4   1  459.05   43.90
   4   4   1  457.95   42.10
   4   4   1  449.26   43.30
   4   4   1  353.46   44.80
   4   4   1  458.05   51.99
  -4   4  -1  460.45   39.30
  -4   4  -1  413.16   42.60
  -4   4  -1  501.95   43.10
  -4   4  -1  452.35   50.29
  -4   4  -1  450.75   50.89
  -4   4  -1  471.95   48.70
   4   4   1  456.05   49.30
  -4   4  -1  464.35   43.10
   4   4   1  430.46   40.30
   4   4   1  490.15   50.89
  -4   4  -1  475.95   43.40
  -4   4  -1  432.46   44.80
  -5  -4  -1   21.60   12.30
  -5  -4  -1   32.00   24.60
   5  -4   1    0.10    6.70
   5  -4   1    8.70   11.40
   5  -4   1   22.50    6.60
  -5  -4  -1    3.10    8.80
  -5  -4  -1   23.30   16.60
  -5  -4  -1   35.30   21.40
   5  -4   1   -2.20   12.10
   5  -4   1    8.90   12.50
  -5  -4  -1    5.40    8.90
   5  -4   1   26.20   11.80
  -5  -4  -1   20.50   12.70
  -5  -4  -1   20.20   13.10
  -5  -4  -1   10.20   12.50
  -5  -4  -1   19.30   18.30
   5  -4   1   44.80   19.50
   5  -4   1    7.30   13.50
   5  -4   1    6.70   18.20
   5  -4   1   17.30   13.20
   5   4   1   28.10   15.90
  -5   4  -1   32.60   22.60
  -5   4  -1   24.40   16.90
   5   4   1    7.50   49.80
  -5   4  -1   17.10    9.40
   5   4   1   18.60   12.70
  -5   4  -1   16.00   11.70
   5   4   1   20.00   17.50
  -5   4  -1   15.80   17.90
   5   4   1   23.80   12.30
   5   4   1   32.10   20.90
   5   4   1   12.60   11.10
  -5   4  -1   10.60    9.60
  -5   4  -1   20.00    7.70
  -5   4  -1   11.10   12.10
  -5   4  -1   20.60   11.90
  -5   4  -1   11.30   13.30
   5   4   1   15.30    8.50
   5   4   1   36.90   21.40
  -5   4  -1   36.20   14.60
  -5   4  -1   17.60   18.90
   5   4   1   14.80   16.00
   6  -4   1  119.39   26.10
   6  -4   1  153.78   20.10
  -6  -4  -1  105.19   23.00
  -6  -4  -1  113.79   27.00
  -6  -4  -1   91.79   19.50
  -6  -4  -1   97.39   22.90
   6  -4   1  121.69   15.90
   6  -4   1  100.39   21.70
   6  -4   1  141.69   25.40
  -6  -4  -1   96.49   20.40
  -6  -4  -1  161.28   33.00
   6  -4   1  101.49   20.50
  -6  -4  -1   65.19   28.80
  -6  -4  -1   94.29   19.40
   6  -4   1  140.09   30.20
  -6  -4  -1   96.59   13.30
  -6  -4  -1  100.29   21.70
   6  -4   1  129.29   22.50
   6  -4   1  134.09   18.40
   6   4   1   63.79   27.00
   6   4   1  116.69   25.70
   6   4   1   90.69   26.90
  -6   4  -1   76.29   22.00
  -6   4  -1  160.38   25.40
  -6   4  -1  159.08   30.40
  -6   4  -1  125.79   23.50
  -6   4  -1  138.19   29.60
  -6   4  -1  201.68   26.40
  -6   4  -1  144.19   22.80
   6   4   1  113.39   23.80
  -6   4  -1  133.59   30.40
   6   4   1  150.68   60.69
  -6   4  -1  134.59   22.30
  -6   4  -1  139.99   25.70
   6   4   1  128.19   21.90
  -6   4  -1  160.88   27.30
   6   4   1   95.59   26.40
   6   4   1  168.08   28.30
   6   4   1  143.79   22.10
   7  -4   1  124.99   24.20
  -7  -4  -1  102.19   23.80
  -7  -4  -1   94.89   30.70
   7  -4   1  123.49   26.90
  -7  -4  -1  128.09   31.40
  -7  -4  -1   61.89   20.50
  -7  -4  -1  119.59   27.70
   7  -4   1  108.39   26.50
   7  -4   1  120.19   17.10
  -7  -4  -1  123.29   21.90
   7  -4   1   79.79   20.50
   7  -4   1   96.99   21.70
  -7  -4  -1  135.49   27.80
  -7  -4  -1  130.59   24.10
   7  -4   1   87.99   11.20
  -7  -4  -1  103.69   19.80
  -7  -4  -1   67.79   18.50
  -7  -4  -1  148.09   23.30
   7  -4   1  106.09   23.20
   7   4   1   89.29   22.20
  -7   4  -1   96.19   20.70
  -7   4  -1  144.89   26.60
   7   4   1   81.69   27.90
  -7   4  -1  117.49   21.80
   7   4   1  117.19   30.50
   7   4   1  105.99   22.40
  -7   4  -1   99.59   30.10
   7   4   1  130.49   30.20
   7   4   1  140.89   23.20
  -7   4  -1   99.39   23.40
  -7   4  -1  104.79   22.40
  -7   4  -1  113.29   26.80
   7   4   1  111.79   22.00
  -7   4  -1   87.39   19.30
  -7   4  -1   74.79   20.80
  -7   4  -1  137.59   29.30
   7   4   1  129.49   66.99
   7   4   1   96.99   23.50
  -7   4  -1  118.39   23.10
  -8  -4  -1   80.49   13.20
   8  -4   1   -3.00   41.20
  -8  -4  -1   80.79   21.80
  -8  -4  -1   51.59   27.90
   8  -4   1   92.59   21.00
  -8  -4  -1   82.59   26.90
   8  -4   1   81.49   22.50
  -8  -4  -1  121.39   31.30
   8  -4   1   21.80   17.40
  -8  -4  -1   54.79   20.60
   8  -4   1   48.70   11.70
   8  -4   1   17.10   16.40
   8  -4   1   32.70   17.80
   8  -4   1   53.39   20.90
  -8  -4  -1   41.40   19.60
  -8  -4  -1   51.39   18.40
  -8  -4  -1   68.99   17.80
  -8   4  -1   44.30   22.00
  -8   4  -1   97.79   20.40
  -8   4  -1   62.89   23.50
   8   4   1   57.19   23.80
  -8   4  -1   66.99   19.30
  -8   4  -1   60.59   17.50
   8   4   1   75.89   21.40
  -8   4  -1   38.00   18.50
   8   4   1   31.90   29.50
  -8   4  -1   47.90   24.30
   8   4   1   93.49   64.29
   8   4   1   57.29   20.40
   8   4   1   51.89   16.60
  -8   4  -1   79.89   21.00
  -8   4  -1   32.40   20.10
   8   4   1   78.59   18.10
   8   4   1   27.10   20.50
  -9  -4  -1   24.20   18.50
   9  -4   1   14.70   18.50
  -9  -4  -1   28.50   17.80
   9  -4   1   34.30   19.20
   9  -4   1   21.70   17.20
  -9  -4  -1   34.90   25.60
   9  -4   1   16.00   17.70
  -9  -4  -1   21.10   14.20
  -9  -4  -1    9.30   16.20
   9  -4   1   47.50   22.40
   9  -4   1   64.29   19.50
  -9  -4  -1   41.20   23.00
  -9  -4  -1   12.40    9.40
  -9  -4  -1   38.50   20.90
   9  -4   1   36.40   13.80
  -9   4  -1   55.09   22.10
   9   4   1  -13.20   22.40
  -9   4  -1   46.50   24.60
   9   4   1   18.10   20.90
  -9   4  -1   45.00   23.00
   9   4   1   49.10   16.30
  -9   4  -1    7.80   18.00
  -9   4  -1   33.90   17.30
  -9   4  -1   26.30   17.60
   9   4   1   54.59   20.40
  -9   4  -1   21.30   22.70
  10  -4   1  120.79   28.30
 -10  -4  -1   85.49   26.10
  10  -4   1   72.09   24.60
  10  -4   1   68.49   23.50
  10  -4   1   89.19   19.70
 -10  -4  -1   71.99   31.60
  10  -4   1  157.88   29.40
 -10  -4  -1   95.49   25.30
 -10  -4  -1   91.59   28.90
 -10  -4  -1   78.19   23.50
  10  -4   1   99.29   28.40
 -10  -4  -1   73.19   33.70
  10  -4   1  203.18   64.09
 -10  -4  -1   90.79   15.70
  10   4   1   94.29   30.80
 -10   4  -1   58.19   25.70
 -10   4  -1  127.49   28.20
 -10   4  -1  102.29   24.90
 -10   4  -1   91.79   29.70
 -10   4  -1  114.89   26.20
  10   4   1   93.39   32.80
 -10   4  -1  146.79   34.30
 -10   4  -1  113.59   33.80
  10   4   1  101.59   15.60
  10   4   1   93.39   24.70
 -11  -4  -1  126.09   38.50
  11  -4   1  163.38   25.30
 -11  -4  -1  103.99   38.90
 -11  -4  -1   96.89   30.20
  11  -4   1  183.98   30.40
 -11  -4  -1   82.69   19.60
 -11  -4  -1  158.08   28.20
  11  -4   1  153.18   32.50
 -11  -4  -1   98.39   26.80
  11  -4   1  116.49   76.29
 -11  -4  -1  151.88   35.10
  11  -4   1  103.29   29.60
  11  -4   1  165.78   36.20
  11   4   1  137.49   41.60
 -11   4  -1  176.48   35.70
 -11   4  -1  177.28   36.30
 -11   4  -1  105.89   31.60
  11   4   1  128.49   28.50
  11   4   1  110.59   34.50
 -11   4  -1  120.99   27.80
 -11   4  -1  162.08   38.00
 -11   4  -1  147.39   31.60
  11   4   1  146.99  103.79
 -11   4  -1  146.39   36.30
 -12  -4  -1   86.29   33.60
  12  -4   1   42.90   27.00
 -12  -4  -1   55.89   26.60
 -12  -4  -1   50.49   15.70
  12  -4   1   83.19   20.70
 -12  -4  -1   75.89   22.60
 -12  -4  -1   44.80   24.70
  12  -4   1   62.59   26.70
 -12  -4  -1   19.40   21.50
 -12  -4  -1   79.19   36.70
 -12   4  -1   51.99   31.80
  12   4   1  121.69   36.40
 -12   4  -1   74.39   31.70
 -12   4  -1   71.69   21.30
 -12   4  -1   50.99   26.80
  12   4   1  110.29  101.69
  12   4   1   91.39   32.00
  12   4   1   65.49   25.30
 -13  -4  -1   32.30   26.00
  13   4   1   47.70   35.50
 -14  -4  -1  -34.50   21.50
 -14  -4  -1   41.40   21.30
  14  -4   1   12.10   24.70
 -14  -4  -1   -3.30   21.70
 -14  -4  -1   69.39   57.69
  14  -4   1   10.50   22.00
  14  -4   1  -19.40   14.40
 -14  -4  -1   -1.10   24.30
  14  -4   1  -17.90   22.40
 -14  -4  -1  -32.30   22.50
 -14   4  -1    0.10   24.60
 -14   4  -1   25.50   24.30
 -14   4  -1   27.70   19.30
 -14   4  -1  -25.50   21.00
 -14   4  -1    3.70   30.00
  14   4   1  -13.20   20.40
  14   4   1    2.30   22.20
  14   4   1    3.40   30.50
 -14   4  -1    4.10   21.70
 -15  -4  -1  -12.50   18.80
  15  -4   1  -14.70   19.90
 -15  -4  -1   14.80   31.20
  15  -4   1  -27.30   24.30
 -15  -4  -1   16.90   24.20
 -15  -4  -1   63.89   30.90
  15  -4   1   14.90   24.50
 -15   4  -1   47.50   29.60
 -15   4  -1   18.30   24.90
 -15   4  -1   17.80   26.80
 -15   4  -1   23.80   30.30
 -15   4  -1  -22.60   20.30
  15   4   1  -12.20   27.10
  16  -4   1   64.99   30.80
 -15  -5   1  -26.90   23.30
  15  -5  -1   13.20   23.80
 -15  -5   1   28.60   25.80
  15  -5  -1   62.59   29.80
 -15  -5   1   32.10   31.00
 -15  -5   1   -5.30   18.30
 -15  -5   1   11.80   28.50
  15   5  -1   -2.30   40.10
 -15   5   1   18.80   27.20
 -15   5   1  -23.70   25.40
 -15   5   1  -51.29   20.70
 -15   5   1   16.70   21.40
 -15   5   1   52.59   23.20
  15   5  -1   45.20   27.10
 -15   5   1   37.00   29.30
 -14  -5   1  -63.89   24.40
 -14  -5   1    6.00   20.70
 -14  -5   1   14.60   30.30
 -14  -5   1   33.30   20.30
  14  -5  -1   18.80   28.90
 -14  -5   1  -19.80   21.90
 -14  -5   1   36.00   32.80
  14  -5  -1   19.40   28.80
  14  -5  -1  -19.00   16.60
 -14   5   1   59.29   28.30
  14   5  -1    8.80   24.00
  14   5  -1   -3.00   25.30
  14   5  -1  -28.50   32.70
 -14   5   1  -51.99   15.50
 -14   5   1   70.39   26.30
 -14   5   1   11.20   21.40
 -14   5   1   42.50   23.40
 -13  -5   1   31.60   22.20
 -13  -5   1    8.10   18.90
 -13  -5   1    5.40   22.00
 -13  -5   1   19.20   28.50
 -13  -5   1  -10.20   11.60
  13  -5  -1   10.70   20.90
 -13  -5   1   50.99   31.30
  13  -5  -1  -31.10   16.70
 -13  -5   1   30.40   30.60
  13   5  -1   45.50   40.50
 -13   5   1   27.60   20.40
  13   5  -1    0.70   22.60
 -13   5   1   25.40   20.60
 -13   5   1   28.40   27.00
  13   5  -1   21.50   24.70
 -12  -5   1   21.80   24.60
  12   5  -1   33.40   37.50
 -12   5   1   42.90   24.50
  12   5  -1   54.59   27.30
 -12   5   1   29.50   22.10
  12   5  -1  133.19  106.79
 -12   5   1   33.60   22.70
  11  -5  -1  107.29   24.10
  11  -5  -1   60.29   25.30
 -11  -5   1   67.79   26.30
  11  -5  -1   71.89   27.60
 -11  -5   1   90.49   26.20
  11  -5  -1   76.99   27.50
 -11  -5   1   52.29   33.70
 -11  -5   1   41.70   27.90
 -11  -5   1  114.69   53.79
 -11  -5   1  117.89   17.30
 -11  -5   1   82.59   23.90
  11   5  -1   74.99   28.80
 -11   5   1  112.19   31.90
 -11   5   1   92.99   23.40
  11   5  -1  114.19   42.30
 -11   5   1   86.69   23.70
 -11   5   1  110.79   31.10
 -11   5   1   43.10   26.60
 -11   5   1   96.19   30.30
 -10  -5   1    1.30   16.00
  10  -5  -1   30.80   18.60
  10  -5  -1   33.70   25.40
 -10  -5   1    1.20   26.10
  10  -5  -1  -10.80   17.20
  10  -5  -1   23.30   15.50
 -10  -5   1   16.30   21.50
 -10  -5   1    2.50   17.50
 -10  -5   1    4.00    8.10
 -10  -5   1   -1.70   20.10
  10  -5  -1  -22.90   14.70
 -10  -5   1   28.80   17.80
  10  -5  -1    3.90   17.90
  10   5  -1   21.40   22.20
 -10   5   1   46.10   24.10
  10   5  -1   11.40   21.50
 -10   5   1   35.90   19.40
  10   5  -1   60.79   80.39
 -10   5   1    2.80   13.00
 -10   5   1   40.10   22.60
  10   5  -1   33.10   27.30
 -10   5   1   25.50   22.00
 -10   5   1    6.10   20.40
  -9  -5   1  -13.50   10.70
   9  -5  -1   -0.60   15.10
   9  -5  -1  -10.50   15.00
  -9  -5   1   -8.60   15.50
  -9  -5   1  -31.90   15.90
   9  -5  -1  -23.50   12.50
  -9  -5   1    2.80   18.60
   9  -5  -1   11.30   17.90
  -9  -5   1  -10.50   19.50
   9  -5  -1   -4.10   46.60
  -9  -5   1  -16.80   23.00
  -9  -5   1  -30.60   13.90
   9  -5  -1   -2.00   15.80
  -9   5   1   30.00   19.60
   9   5  -1   12.70   16.90
  -9   5   1    0.70   16.00
   9   5  -1   -1.20    9.70
  -9   5   1    6.70   43.60
  -9   5   1   -4.40   19.20
   9   5  -1   30.60   26.50
  -9   5   1  -15.20   18.60
  -9   5   1    3.20   14.70
   9   5  -1   -1.60    7.80
  -9   5   1   -2.00    5.00
   9   5  -1    1.10   11.80
  -9   5   1   -1.50   14.60
  -9   5   1   -8.10   16.40
   9   5  -1  -10.60   17.90
  -8  -5   1   12.50   14.00
  -8  -5   1  -25.50   14.90
  -8  -5   1   28.30   17.20
  -8  -5   1    3.50   24.00
  -8  -5   1    9.50    6.30
   8  -5  -1   28.90   14.40
   8  -5  -1   19.20   16.30
  -8  -5   1   31.80    8.10
   8  -5  -1   -1.40   15.10
  -8  -5   1   -7.60   13.10
   8  -5  -1   12.70   16.10
   8  -5  -1   21.00   16.60
   8  -5  -1    5.00   15.00
  -8   5   1   23.60   16.40
  -8   5   1  101.39   42.70
   8   5  -1   20.60   19.00
   8   5  -1    2.50   16.20
   8   5  -1    1.80   17.10
  -8   5   1    6.60   12.10
  -8   5   1   45.60   19.80
   8   5  -1   10.70   10.50
  -8   5   1   17.10   18.10
  -8   5   1   42.80   23.70
  -8   5   1   -5.30   15.70
   8   5  -1   57.89   26.80
   8   5  -1   17.80   13.90
  -8   5   1   44.90   16.20
  -8   5   1   21.80   17.00
  -8   5   1   17.50   10.80
   8   5  -1  -38.10   63.49
   7  -5  -1  346.47   46.40
   7  -5  -1  388.86   45.10
   7  -5  -1  471.85   45.80
  -7  -5   1  384.06   52.09
  -7  -5   1  382.06   58.99
   7  -5  -1  430.46   49.80
  -7  -5   1  415.56   41.50
  -7  -5   1  387.06   34.70
  -7  -5   1  458.85   52.09
  -7  -5   1  399.16   42.40
   7  -5  -1  379.96   44.20
  -7  -5   1  440.36   47.60
  -7  -5   1  383.46   42.90
  -7  -5   1  476.85   47.80
  -7  -5   1  473.95   56.29
  -7  -5   1  402.96   42.90
  -7  -5   1  455.45   37.40
   7   5  -1  165.48  107.49
   7   5  -1  368.16   42.70
  -7   5   1  453.65   44.00
   7   5  -1  458.35   42.30
  -7   5   1  435.56   43.40
   7   5  -1  355.66   43.10
   7   5  -1  426.96   50.99
  -7   5   1  408.96   49.00
   7   5  -1  429.16   48.10
   7   5  -1  405.66   48.20
  -7   5   1  371.06   47.40
   7   5  -1  405.76   59.59
  -7   5   1  363.86   44.60
  -7   5   1  431.56   47.00
   7   5  -1  369.36   39.50
  -7   5   1  375.26   46.80
  -7   5   1  378.26   45.80
  -7   5   1  432.46   37.90
  -7   5   1  411.46   43.50
  -7   5   1  398.96   42.60
  -7   5   1  461.25   41.80
   6  -5  -1   61.69   19.30
   6  -5  -1   17.80   12.70
  -6  -5   1   27.20   14.50
  -6  -5   1   13.00   10.30
  -6  -5   1   16.20   14.10
   6  -5  -1   -4.20    8.40
   6  -5  -1   14.30   12.80
  -6  -5   1   14.10   15.80
  -6  -5   1   51.49   26.90
   6  -5  -1   41.10   17.30
  -6  -5   1   35.30   10.70
   6  -5  -1    0.70   10.30
   6  -5  -1   21.00   14.60
  -6  -5   1    3.40   16.40
  -6  -5   1   29.80   12.80
  -6  -5   1   -2.60   13.10
  -6  -5   1   37.00   19.90
  -6   5   1   88.19   36.90
   6   5  -1   37.60   21.50
  -6   5   1    4.30    8.80
  -6   5   1   23.90   17.30
   6   5  -1   28.60   13.30
  -6   5   1   38.00   16.00
  -6   5   1   -8.10   14.30
   6   5  -1   21.30   20.40
   6   5  -1   30.00   16.80
  -6   5   1   26.50   13.30
   6   5  -1   20.30   21.80
   6   5  -1   10.10    9.30
   6   5  -1   24.50   11.20
  -6   5   1   19.60   16.90
  -6   5   1   24.40   11.60
  -6   5   1   10.40   11.80
  -6   5   1    8.10    9.90
   6   5  -1   34.20   13.70
   6   5  -1  153.48   61.19
  -6   5   1   11.20   11.40
  -6   5   1    7.60   16.30
  -5  -5   1  131.29   26.80
  -5  -5   1  120.09   25.80
  -5  -5   1  102.59   21.10
   5  -5  -1   76.09   17.90
  -5  -5   1   71.99   15.70
  -5  -5   1   49.40   17.30
   5  -5  -1   85.09   25.00
  -5  -5   1   61.59   20.30
   5  -5  -1  120.69   15.40
  -5  -5   1   89.99   25.50
   5  -5  -1   53.09   17.20
  -5  -5   1   68.09   29.20
   5  -5  -1  137.49   27.10
   5  -5  -1   89.59   23.10
  -5  -5   1   74.69   19.60
   5  -5  -1   79.39   19.20
  -5  -5   1   77.39   19.70
   5  -5  -1  100.79   17.40
  -5   5   1   97.39   18.80
   5   5  -1   64.69   21.20
  -5   5   1  106.39   17.50
  -5   5   1   84.79   34.50
  -5   5   1   57.59   24.60
   5   5  -1   96.09   17.80
  -5   5   1  100.19   19.50
   5   5  -1   82.99   17.50
   5   5  -1  101.09   25.30
  -5   5   1   98.49   26.60
   5   5  -1  102.49   17.60
   5   5  -1   89.69   19.30
  -5   5   1  128.89   26.90
   5   5  -1  114.39   29.10
   5   5  -1   69.49   25.70
  -5   5   1  124.19   24.50
  -5   5   1   97.89   17.90
  -5   5   1  105.49   18.80
   5   5  -1  118.29   28.60
  -5   5   1   74.29   18.20
  -5   5   1  100.99   25.30
  -5   5   1   91.39   17.20
  -4  -5   1  421.16   53.39
   4  -5  -1  437.86   41.90
   4  -5  -1  457.75   47.90
  -4  -5   1  483.95   44.70
   4  -5  -1  392.56   43.30
  -4  -5   1  492.75   50.29
   4  -5  -1  352.96   47.30
   4  -5  -1  432.96   46.70
  -4  -5   1  433.46   49.20
   4  -5  -1  400.36   43.50
   4  -5  -1  461.65   41.30
  -4  -5   1  460.45   46.40
  -4  -5   1  471.55   41.60
  -4  -5   1  509.15   51.29
  -4  -5   1  481.95   43.10
  -4  -5   1  502.55   47.90
   4  -5  -1  447.96   42.00
  -4  -5   1  507.45   44.80
   4   5  -1  483.35   43.60
  -4   5   1  426.66   41.50
  -4   5   1  375.56   47.60
  -4   5   1  428.16   42.90
   4   5  -1  429.66   48.70
  -4   5   1  425.06   47.00
   4   5  -1  497.05   41.70
  -4   5   1  434.76   43.00
  -4   5   1  471.55   43.90
   4   5  -1  432.66   47.80
   4   5  -1  447.26   43.30
  -4   5   1  406.96   46.40
  -4   5   1  429.86   43.30
  -4   5   1  421.66   41.50
   4   5  -1  485.75   53.89
  -4   5   1  451.45   42.00
  -4   5   1  442.76   50.89
   4   5  -1  444.96   50.79
   4   5  -1  478.05   43.50
  -4   5   1  403.26   58.09
   4   5  -1  421.76   49.00
  -3  -5   1  168.88   25.30
   3  -5  -1  117.79   19.70
   3  -5  -1  178.88   31.10
   3  -5  -1  122.39   20.90
   3  -5  -1  152.28   19.70
  -3  -5   1   89.69   18.20
   3  -5  -1  120.09   14.20
  -3  -5   1  108.89   27.20
   3  -5  -1  195.18   29.70
   3  -5  -1  169.08   25.10
  -3  -5   1   94.29   20.50
  -3  -5   1  130.19   25.60
  -3  -5   1  122.39   23.90
   3  -5  -1  118.99   19.80
   3  -5  -1  159.48   22.70
  -3  -5   1  106.39   30.30
  -3  -5   1  123.59   31.80
  -3  -5   1   91.69   20.70
  -3  -5   1  107.49   26.70
   3  -5  -1  207.68   34.50
   3   5  -1  120.89   18.60
  -3   5   1  136.59   28.40
   3   5  -1  126.69   29.30
  -3   5   1  103.89   14.90
  -3   5   1  146.29   21.70
  -3   5   1  131.29   21.10
   3   5  -1   90.29   24.20
  -3   5   1  160.98   21.90
  -3   5   1  162.88   19.70
  -3   5   1  118.59   31.20
   3   5  -1  162.28   31.60
   3   5  -1  169.38   31.00
   3   5  -1  119.99   31.90
  -3   5   1  146.89   30.80
   3   5  -1  145.09   22.00
  -3   5   1  167.78   30.60
   3   5  -1  151.88   24.20
  -3   5   1  115.39   19.60
  -3   5   1  177.28   23.20
   3   5  -1   93.19   19.10
  -3   5   1  123.69   22.20
   2  -5  -1  205.28   34.40
   2  -5  -1  153.08   22.70
   2  -5  -1  177.08   19.60
   2  -5  -1  187.78   24.30
  -2  -5   1  145.79   19.10
  -2  -5   1  180.18   25.70
  -2  -5   1  217.48   30.10
  -2  -5   1  196.88   36.10
  -2  -5   1  140.49   24.10
   2  -5  -1  182.18   24.20
   2  -5  -1  148.49   22.00
  -2  -5   1  150.08   23.30
   2  -5  -1  271.47   37.50
   2  -5  -1  228.48   30.00
  -2  -5   1  223.38   34.10
  -2  -5   1  168.98   34.50
  -2  -5   1  184.98   27.80
   2  -5  -1  218.48   31.60
   2  -5  -1  166.18   19.70
  -2  -5   1  219.98   32.70
   2  -5  -1  242.28   28.60
  -2   5   1  184.38   25.30
  -2   5   1  167.98   21.30
  -2   5   1  168.88   21.30
  -2   5   1  156.98   28.50
  -2   5   1  175.28   21.00
  -2   5   1  158.28   19.10
   2   5  -1  232.88   36.90
   2   5  -1  183.48   23.20
  -2   5   1  164.58   21.70
   2   5  -1  182.18   32.40
   2   5  -1  170.48   19.20
   2   5  -1  215.08   28.60
   2   5  -1  164.48   34.80
   2   5  -1  171.38   16.30
   2   5  -1  182.78   22.90
   2   5  -1  176.38   29.30
  -2   5   1  193.98   24.90
  -2   5   1  157.88   28.10
   2   5  -1  154.58   28.20
  -2   5   1  176.78   33.30
   2   5  -1  201.18   24.80
  -2   5   1  194.88   34.40
  -1  -5   1  165.78   27.80
   1  -5  -1  179.08   24.20
  -1  -5   1  121.09   30.80
  -1  -5   1  139.19   30.30
   1  -5  -1   81.29   17.50
  -1  -5   1  152.68   28.20
   1  -5  -1  198.68   28.40
  -1  -5   1  136.49   25.00
   1  -5  -1  107.39   20.50
  -1  -5   1  124.89   20.50
   1  -5  -1  145.79   21.10
  -1  -5   1   91.09   18.00
   1  -5  -1   88.29   18.00
  -1  -5   1  108.69   19.90
   1  -5  -1  109.89   17.40
  -1  -5   1  145.99   24.20
  -1  -5   1  121.29   17.50
   1  -5  -1  163.78   28.20
   1  -5  -1  104.09   17.10
   1  -5  -1  127.09   30.20
   1  -5  -1  136.29   29.80
  -1   5   1  130.89   24.70
  -1   5   1  136.59   26.70
   1   5  -1   99.99   43.50
   1   5  -1  156.88   20.60
  -1   5   1  106.29   19.20
   1   5  -1   90.49   22.80
   1   5  -1  160.68   32.20
  -1   5   1  105.79   20.30
   1   5  -1   91.49   28.70
   1   5  -1  143.59   21.60
   1   5  -1  121.59   17.20
  -1   5   1  125.19   17.50
  -1   5   1  104.69   28.10
   1   5  -1  134.59   20.00
   1   5  -1  109.89   26.80
   1   5  -1  111.09   23.30
  -1   5   1  132.59   18.80
  -1   5   1  145.69   20.00
  -1   5   1   95.79   16.00
  -1   5   1  132.89   21.10
   1   5  -1   97.69   13.60
   1   5  -1   96.89   23.10
  -1   5   1  123.19   29.10
   0  -5  -1   24.30   22.10
   0  -5  -1   36.80   10.70
   0  -5  -1   58.39   16.40
   0  -5  -1   91.09   20.00
   0  -5  -1   54.59   14.60
   0  -5   1   51.49   25.10
   0  -5  -1   54.29   13.30
   0  -5  -1   52.99   10.60
   0  -5  -1   60.89   16.80
   0  -5   1   51.99   14.60
   0  -5   1   64.69   20.00
   0  -5   1   40.30   22.60
   0  -5   1   66.39   18.10
   0  -5   1   39.70   11.50
   0  -5   1   49.40   15.30
   0  -5   1   68.59   21.80
   0  -5  -1   68.79   23.90
   0  -5  -1   98.09   22.30
   0  -5   1   40.90   13.80
   0  -5   1   30.00   12.90
   0   5  -1   37.00   13.90
   0   5   1   60.49   14.90
   0   5  -1   51.89   16.10
   0   5   1   73.69   23.30
   0   5  -1   43.50   23.80
   0   5   1   61.69   14.00
   0   5  -1   40.80   16.90
   0   5  -1   95.19   35.90
   0   5   1   45.80    9.60
   0   5   1   55.79   12.00
   0   5  -1   46.80   20.80
   0   5   1   33.60   19.30
   0   5  -1   45.90   14.40
   0   5  -1   40.40   12.50
   0   5  -1   57.49   12.50
   0   5   1   50.99   16.00
   0   5  -1   48.50   17.10
   0   5   1   44.40   16.60
   0   5   1   39.30   24.10
   0   5   1   64.09   17.30
   0   5   1   68.79   13.20
   0   5  -1   37.30   21.90
   1  -5   1  265.07   29.80
   1  -5   1  186.88   35.90
  -1  -5  -1  244.58   31.00
  -1  -5  -1  200.98   36.10
   1  -5   1  198.78   22.50
  -1  -5  -1  213.38   36.00
  -1  -5  -1  151.88   23.10
  -1  -5  -1  166.48   19.80
  -1  -5  -1  182.68   24.00
  -1  -5  -1  157.18   22.40
   1  -5   1  197.98   24.10
  -1  -5  -1  179.68   29.20
   1  -5   1  152.48   23.50
   1  -5   1  198.48   23.30
  -1  -5  -1  204.58   32.70
  -1  -5  -1  161.08   21.40
   1  -5   1  196.68   21.40
   1  -5   1  237.88   37.60
   1  -5   1  221.38   27.30
  -1  -5  -1  147.99   24.50
   1  -5   1  194.58   24.00
  -1   5  -1  212.68   37.60
   1   5   1  165.88   20.90
  -1   5  -1  245.88   36.10
  -1   5  -1  207.38   23.40
   1   5   1  139.89   25.30
  -1   5  -1  193.28   24.60
  -1   5  -1  209.98   21.40
   1   5   1  175.18   21.00
   1   5   1  150.28   30.80
   1   5   1  228.78   29.90
   1   5   1  198.48   35.40
   1   5   1  173.08   18.40
  -1   5  -1  228.88   23.80
   1   5   1  149.09   33.70
  -1   5  -1  190.68   24.20
  -1   5  -1  178.68   29.40
  -1   5  -1  282.07   39.60
  -1   5  -1  199.68   22.10
   1   5   1  209.58   30.10
   1   5   1  181.68   22.00
   1   5   1  166.98   22.80
  -1   5  -1  138.79   35.20
   2  -5   1   28.50   12.10
   2  -5   1   37.60   20.40
  -2  -5  -1   13.70    9.90
   2  -5   1   42.60   12.90
   2  -5   1   63.49   12.90
  -2  -5  -1   22.30   14.50
  -2  -5  -1   28.30   20.10
  -2  -5  -1   29.20    6.10
  -2  -5  -1   25.40   17.80
  -2  -5  -1   28.00   11.80
  -2  -5  -1   -0.70   20.60
   2  -5   1   37.30   12.90
  -2  -5  -1   -3.40   10.80
   2  -5   1   51.29   24.10
  -2  -5  -1   48.90   19.30
   2  -5   1   34.90   12.00
   2  -5   1   23.50    9.40
   2  -5   1   33.00   14.50
  -2  -5  -1   16.60   14.90
  -2  -5  -1   24.10   11.30
   2  -5   1   43.90   17.30
   2  -5   1   42.10   18.70
  -2   5  -1   19.50   21.00
  -2   5  -1   39.00   12.70
  -2   5  -1   31.90   12.80
   2   5   1   18.90   15.30
   2   5   1   25.60   10.70
   2   5   1   43.00   22.90
   2   5   1   14.30    8.90
  -2   5  -1    7.50   17.60
  -2   5  -1   53.99   13.10
  -2   5  -1   21.70    9.70
  -2   5  -1   24.10    9.70
  -2   5  -1   21.30   12.80
   2   5   1   24.80   13.10
   2   5   1    5.50   16.00
   2   5   1   18.90   18.30
  -2   5  -1   39.70   19.90
   2   5   1   30.70   14.50
   2   5   1   43.00   20.50
   2   5   1   36.00    6.30
  -3  -5  -1  131.99   25.10
  -3  -5  -1  160.08   22.80
  -3  -5  -1  201.98   26.20
  -3  -5  -1  153.48   35.40
  -3  -5  -1  197.48   29.00
   3  -5   1  224.28   31.20
  -3  -5  -1  138.79   13.90
  -3  -5  -1  144.99   33.80
   3  -5   1  132.89   21.30
   3  -5   1  175.08   33.30
  -3  -5  -1  225.58   31.30
   3  -5   1  118.19   22.10
  -3  -5  -1  223.38   34.50
  -3  -5  -1  132.39   30.60
   3  -5   1  181.68   23.50
  -3  -5  -1  126.99   22.90
   3  -5   1  184.28   36.30
   3  -5   1  173.08   25.20
   3  -5   1  157.98   23.30
   3  -5   1  142.49   17.90
   3  -5   1  193.18   31.00
  -3   5  -1  135.29   34.10
   3   5   1  116.19   49.30
   3   5   1  176.78   23.40
   3   5   1  211.98   26.10
  -3   5  -1  161.78   22.60
  -3   5  -1  146.69   30.80
  -3   5  -1  163.78   22.80
   3   5   1  165.48   24.30
   3   5   1  169.28   36.50
   3   5   1  144.89   28.40
  -3   5  -1  173.48   32.40
  -3   5  -1  123.19   22.20
   3   5   1  142.59   27.10
  -3   5  -1  172.58   24.10
   3   5   1  186.48   26.20
   3   5   1  194.98   34.00
   3   5   1  203.58   36.30
  -3   5  -1  161.88   22.90
  -3   5  -1  172.78   22.60
  -3   5  -1  129.39   27.60
   4  -5   1  145.09   28.10
  -4  -5  -1  228.68   35.60
  -4  -5  -1  151.78   22.20
   4  -5   1  144.79   20.10
   4  -5   1   96.29   21.50
   4  -5   1  136.39   15.40
  -4  -5  -1  144.19   35.00
  -4  -5  -1  215.38   34.70
  -4  -5  -1  132.39   32.00
  -4  -5  -1  177.58   26.90
   4  -5   1  207.98   29.00
  -4  -5  -1  196.58   29.30
   4  -5   1  163.48   25.10
   4  -5   1  101.39   20.70
  -4  -5  -1  161.48   20.50
   4  -5   1  152.88   24.20
   4  -5   1  147.59   29.70
  -4  -5  -1  129.19   21.70
   4  -5   1  127.79   31.30
  -4  -5  -1  191.18   29.30
   4   5   1  150.18   31.90
  -4   5  -1  176.18   24.90
   4   5   1  130.89   30.00
  -4   5  -1   69.39   29.90
  -4   5  -1  157.48   32.90
  -4   5  -1  164.48   20.80
   4   5   1  146.79   24.40
  -4   5  -1  107.69   28.30
  -4   5  -1  132.69   23.00
  -4   5  -1  158.78   23.90
   4   5   1  199.68   24.00
   4   5   1  193.38   23.70
  -4   5  -1  105.79   20.70
   4   5   1  208.38   33.70
  -4   5  -1  164.18   24.90
   4   5   1  201.78   37.40
  -4   5  -1  135.39   28.30
   4   5   1  187.68   25.30
  -4   5  -1  156.38   22.80
   4   5   1  183.38   28.80
  -5  -5  -1   68.09   16.00
   5  -5   1  105.09   23.80
  -5  -5  -1   65.99   17.80
   5  -5   1   73.59    8.20
  -5  -5  -1   64.59    7.50
   5  -5   1  102.69   18.90
   5  -5   1   74.19   13.10
  -5  -5  -1   60.69   28.10
  -5  -5  -1  134.09   28.20
  -5  -5  -1   62.19    7.60
   5  -5   1   84.49   19.10
   5  -5   1  154.88   30.80
   5  -5   1   73.79   17.30
  -5  -5  -1   93.39   25.50
  -5  -5  -1   85.19   21.10
   5  -5   1   72.69   18.30
   5  -5   1   95.39   27.90
   5  -5   1   90.49   19.50
  -5  -5  -1   65.99   27.40
  -5  -5  -1  123.69   24.30
  -5  -5  -1  109.69   17.30
   5   5   1   63.59   22.90
   5   5   1   51.29   23.50
  -5   5  -1  116.89   20.10
   5   5   1   97.39   23.60
   5   5   1  122.59   18.70
  -5   5  -1   76.99   17.70
  -5   5  -1  130.69   21.20
  -5   5  -1  103.69   18.60
   5   5   1   75.89   25.40
  -5   5  -1  101.89   20.00
  -5   5  -1  110.79   20.80
  -5   5  -1   78.59   27.20
   5   5   1  134.49   31.50
  -5   5  -1   67.79   22.40
   5   5   1   85.99   18.10
  -5   5  -1   83.29   17.70
  -5   5  -1  138.49   29.30
   5   5   1   75.79   17.50
   5   5   1   73.09   14.90
  -5   5  -1  111.59   27.50
  -6  -5  -1   29.00   11.80
   6  -5   1   26.30   12.80
   6  -5   1   17.30   13.40
  -6  -5  -1   63.79   22.80
   6  -5   1   34.30   12.70
  -6  -5  -1    9.80   21.40
  -6  -5  -1   36.60    6.70
   6  -5   1   47.40   15.00
  -6  -5  -1   56.89   18.00
  -6  -5  -1   43.90   11.70
   6  -5   1   33.40   24.30
  -6  -5  -1   39.00   14.90
  -6  -5  -1   46.40   23.10
  -6  -5  -1   35.20   16.00
   6  -5   1   28.10   13.90
   6  -5   1   26.70   20.00
   6  -5   1   32.00    8.20
   6  -5   1   33.50   17.40
  -6  -5  -1   34.30   15.80
  -6  -5  -1   23.50   22.60
  -6   5  -1   43.40   16.30
   6   5   1   58.59   24.30
  -6   5  -1   10.00   18.00
  -6   5  -1    1.60   22.30
  -6   5  -1   65.29   18.30
   6   5   1   39.00   15.00
  -6   5  -1   25.40   16.90
  -6   5  -1   33.30   19.40
  -6   5  -1   24.60    8.30
   6   5   1   29.10   25.60
  -6   5  -1   34.60   13.50
  -6   5  -1   35.20   14.10
   6   5   1   50.79   15.60
   6   5   1   68.59   16.50
   6   5   1   35.80   19.60
   6   5   1   66.09   22.30
   6   5   1   79.59   60.89
   6   5   1   55.09   13.90
   6   5   1   38.70   20.00
  -6   5  -1   47.50   21.10
  -6   5  -1   22.70   11.40
  -6   5  -1   56.79   16.70
  -7  -5  -1  133.69   24.90
  -7  -5  -1  161.78   16.20
   7  -5   1  148.69   18.60
  -7  -5  -1  212.58   35.90
  -7  -5  -1  192.68   32.60
   7  -5   1  195.88   31.50
  -7  -5  -1  189.78   28.00
   7  -5   1  197.38   33.80
  -7  -5  -1  101.99   49.20
  -7  -5  -1  209.98   28.60
  -7  -5  -1  201.78   39.60
   7  -5   1  116.39   29.20
   7  -5   1  160.68   34.10
  -7  -5  -1  132.59   26.20
   7  -5   1  183.18   32.00
  -7  -5  -1  190.98   31.60
   7  -5   1  131.89   15.30
   7   5   1  164.48   28.50
  -7   5  -1  175.88   29.00
  -7   5  -1  161.68   37.10
  -7   5  -1  188.58   35.40
  -7   5  -1  182.48   31.20
   7   5   1  166.78   37.50
   7   5   1  191.48   33.20
   7   5   1  184.58   26.90
   7   5   1  164.68   26.40
  -7   5  -1  183.58   28.30
  -7   5  -1  205.18   32.40
  -7   5  -1  186.18   30.90
   7   5   1  121.49   31.50
   7   5   1  180.38   31.40
  -7   5  -1  171.08   26.50
  -7   5  -1  187.08   30.40
   7   5   1  163.08   29.00
   7   5   1  163.98   37.40
  -7   5  -1  169.48   28.80
   7   5   1   50.99   95.79
  -7   5  -1  195.88   35.40
  -8  -5  -1  103.49   25.10
   8  -5   1   55.89   19.90
  -8  -5  -1   77.79   22.80
  -8  -5  -1   73.99   22.40
   8  -5   1   87.39   23.60
   8  -5   1   62.59   10.80
   8  -5   1   80.19   25.70
   8  -5   1   62.09   21.80
  -8  -5  -1   71.89   26.40
   8  -5   1   36.70   42.40
  -8  -5  -1  120.29   27.30
   8  -5   1   57.09   20.70
  -8  -5  -1   96.29   12.50
  -8  -5  -1   84.69   27.00
  -8  -5  -1   46.60   30.00
   8  -5   1   81.19   25.60
   8   5   1   71.19   24.60
   8   5   1   78.69   18.70
  -8   5  -1   88.69   44.30
   8   5   1   62.19   22.90
   8   5   1   75.49   29.10
   8   5   1   46.20   63.99
  -8   5  -1   68.29   28.50
  -8   5  -1   97.39   24.00
  -8   5  -1   52.19   22.00
   8   5   1   82.89   29.70
  -8   5  -1   53.89   22.70
   8   5   1   48.40   18.10
  -8   5  -1   90.19   30.30
   8   5   1   56.49   22.80
  -8   5  -1   51.69   19.20
  -8   5  -1   58.19   20.10
  -9  -5  -1   95.69   26.80
  -9  -5  -1  110.59   26.40
   9  -5   1  113.79   15.10
   9  -5   1  100.39   27.30
  -9  -5  -1   94.69   24.40
   9  -5   1   49.80   51.09
  -9  -5  -1   94.79   36.20
  -9  -5  -1  105.89   27.80
   9  -5   1   67.69   24.20
  -9  -5  -1  183.28   33.60
   9  -5   1  102.39   27.50
   9  -5   1  155.48   30.70
  -9  -5  -1  140.29   39.90
   9  -5   1   55.79   22.40
  -9  -5  -1   88.89   14.30
  -9   5  -1   54.49   22.10
  -9   5  -1  112.99   32.00
  -9   5  -1  153.08   37.10
   9   5   1   73.59   30.30
   9   5   1  100.79   24.80
  -9   5  -1   94.39   28.20
   9   5   1   93.89   33.50
  -9   5  -1  126.99   26.50
   9   5   1  141.69   26.60
   9   5   1   89.79   20.20
  -9   5  -1  100.59   32.20
 -10  -5  -1    9.60   21.00
 -10  -5  -1   28.40   10.80
  10  -5   1   58.39   22.50
 -10  -5  -1    8.30   17.40
 -10  -5  -1   12.60   19.70
  10  -5   1    6.80   19.00
 -10  -5  -1   22.40   21.30
  10  -5   1   21.60   19.70
 -10  -5  -1   39.70   20.00
  10  -5   1   65.69   23.20
  10  -5   1   11.50   20.50
 -10  -5  -1   -4.10   27.40
 -10   5  -1    5.90   22.80
 -10   5  -1   14.00   16.90
 -10   5  -1   -6.10   19.80
 -10   5  -1   35.00   18.70
 -10   5  -1   27.20   23.40
  10   5   1   40.40   16.00
  10   5   1   36.00   21.70
  10   5   1   67.09   80.09
  10   5   1   18.30   25.40
 -10   5  -1   26.30   20.10
  10   5   1   19.50   26.60
 -10   5  -1   15.60   27.20
  11  -5   1   25.00   23.00
 -11  -5  -1   23.60   18.80
 -11  -5  -1   12.80   29.20
 -11  -5  -1   30.00   24.60
 -11  -5  -1    2.20   31.00
  11  -5   1   40.40   22.00
 -11  -5  -1   50.19   11.50
  11  -5   1   17.60   21.50
 -11  -5  -1   58.19   21.40
  11  -5   1   18.40   17.40
 -11  -5  -1   34.60   23.00
  11  -5   1   24.40   26.20
 -11   5  -1   23.90   29.50
 -11   5  -1   27.90   24.30
  11   5   1   51.69   26.20
 -11   5  -1   77.69   27.00
  11   5   1  115.89  104.39
 -11   5  -1   16.40   18.90
  11   5   1   38.50   29.60
 -11   5  -1   54.09   26.50
 -12  -5  -1   15.90   27.10
 -12  -5  -1   17.60   21.70
 -12  -5  -1   -9.40   16.70
  12  -5   1  -17.00   18.30
  12  -5   1   22.20   22.80
 -12  -5  -1   -7.90   28.10
 -12  -5  -1   -4.60   20.60
 -12  -5  -1   -3.80   10.80
 -12   5  -1   37.50   25.10
 -12   5  -1   15.80   29.10
  12   5   1   -4.80   22.90
 -12   5  -1   59.19   29.30
  12   5   1   29.90   31.90
  12   5   1   32.40   21.30
  12   5   1  206.28  107.59
 -12   5  -1   13.30   19.30
 -12   5  -1   47.80   27.60
 -13  -5  -1  -11.00   28.50
  13  -5   1  -21.30   20.90
 -13  -5  -1    1.90   12.50
 -13  -5  -1  -19.30   21.30
 -13  -5  -1   10.90   21.10
  13  -5   1  -29.50   19.40
  13  -5   1    5.20   22.90
 -13  -5  -1   30.10   32.80
 -13  -5  -1   19.60   17.30
 -13   5  -1   75.29   30.10
 -13   5  -1   12.60   22.30
  13   5   1  -24.90   29.40
 -13   5  -1  -11.80   24.20
 -13   5  -1   22.10   27.00
  13   5   1   47.70   21.80
 -13   5  -1  -20.60   16.80
  13   5   1  -12.30   24.80
 -14  -5  -1   55.29   31.10
 -14  -5  -1   12.60   21.30
  14  -5   1  -13.70   19.90
 -14  -5  -1  -17.90   22.20
  14  -5   1  -25.50   18.60
 -14  -5  -1   12.50   23.60
 -14  -5  -1   12.70   34.60
  14   5   1   48.40   39.70
 -14   5  -1    9.20   26.60
 -14   5  -1   18.50   26.80
  14   5   1  -13.50   27.10
 -14   5  -1   22.30   32.20
  14   5   1   31.20   26.90
 -14   5  -1   33.20   27.10
 -14   5  -1   18.40   22.00
 -14   5  -1    2.60   26.90
 -15  -5  -1  -18.00   19.30
  15  -5   1   -1.80   27.30
  15  -5   1  -31.50   16.50
 -15  -5  -1   15.90   19.30
 -15  -5  -1  -17.90   31.50
 -15  -5  -1    1.20   34.60
 -15  -5  -1   -1.00   22.60
 -15   5  -1    9.10   22.00
 -15   5  -1    5.00   25.20
  15   5   1   36.00   38.60
 -15   5  -1   -8.00   23.70
  15   5   1  130.99  133.69
  15   5   1   -8.10   27.10
 -15   5  -1  -61.49   17.80
 -15  -6   1   21.50   38.40
 -15  -6   1   11.00   33.00
 -15   6   1   34.40   30.60
  15   6  -1   20.30   37.60
  14  -6  -1   38.30   24.90
 -14  -6   1   55.49   36.00
 -14  -6   1   50.59   33.90
 -14  -6   1   24.70   23.80
 -14  -6   1   33.80   26.30
  14  -6  -1   67.69   27.60
 -14   6   1   62.29   24.70
 -14   6   1   31.40   27.90
  14   6  -1   21.50   38.30
 -14   6   1   40.60   23.90
 -14   6   1   35.00   29.30
  14   6  -1   -6.40   26.10
  14   6  -1   88.29   32.80
 -13  -6   1   22.00   25.70
 -13  -6   1   41.30   11.50
 -13  -6   1  -12.70   23.00
  13  -6  -1   10.60   25.90
  13  -6  -1    2.10   20.40
  13  -6  -1   40.90   27.30
 -13  -6   1   26.50   32.10
 -13  -6   1   26.50   33.70
 -13  -6   1   35.50   23.60
 -13  -6   1   89.89   27.40
 -13   6   1   34.90   23.30
 -13   6   1   27.10   22.90
  13   6  -1   -9.50   32.30
 -13   6   1   22.20   26.90
  13   6  -1   40.10   26.20
 -13   6   1   45.90   22.80
  13   6  -1   10.90   39.90
 -13   6   1   53.79   26.60
 -12  -6   1   13.10    8.80
 -12  -6   1   43.20   30.20
 -12  -6   1    2.00   18.20
 -12  -6   1   96.69   39.90
 -12  -6   1    4.20   21.20
  12  -6  -1   39.40   25.00
 -12  -6   1   21.40   19.30
  12  -6  -1   -2.30   20.30
 -12  -6   1   63.09   32.50
  12  -6  -1   -0.40   18.60
  12  -6  -1   35.30   19.60
 -12   6   1   50.09   23.70
  12   6  -1   17.80   27.90
 -12   6   1   -4.90   20.40
  12   6  -1   20.70   37.30
 -12   6   1  -18.00   20.40
 -12   6   1    8.50   20.40
  12   6  -1   28.40   28.30
 -12   6   1   48.20   21.50
 -11  -6   1  194.88   44.80
  11  -6  -1  186.18   38.30
  11  -6  -1  216.48   41.20
  11  -6  -1  231.88   37.40
 -11  -6   1  136.29   39.20
  11  -6  -1  291.67   42.00
 -11  -6   1  154.98   37.00
 -11  -6   1  252.17   41.40
 -11  -6   1  230.08   36.40
  11  -6  -1  239.18   41.20
 -11  -6   1  216.88   43.20
 -11   6   1  233.38   36.30
 -11   6   1  249.28   45.10
 -11   6   1  139.29   36.80
 -11   6   1  171.48   38.50
 -11   6   1  103.39   29.70
 -11   6   1  188.68   41.10
  11   6  -1  155.28   37.10
  11   6  -1  192.68   53.49
  11   6  -1  195.98   41.70
 -10  -6   1   -9.90   17.60
 -10  -6   1   13.70   26.10
  10  -6  -1   49.90   26.40
 -10  -6   1  -10.70   13.30
 -10  -6   1   36.60    7.30
 -10  -6   1    7.00   16.20
  10  -6  -1   -3.70   18.00
 -10  -6   1   29.60   20.80
 -10  -6   1   30.00   25.70
  10  -6  -1   47.50   21.60
  10  -6  -1   22.30   20.60
 -10   6   1   53.59   26.30
  10   6  -1   31.80   27.30
  10   6  -1   45.40   30.40
 -10   6   1    8.20   24.00
 -10   6   1   37.40   18.00
  10   6  -1   68.39   27.20
 -10   6   1   39.60   21.50
 -10   6   1    1.70   19.60
 -10   6   1   37.10   20.50
  10   6  -1   18.00    9.10
   9  -6  -1   60.19   23.20
  -9  -6   1   18.00   20.10
  -9  -6   1   62.29   25.80
  -9  -6   1   45.40   21.20
  -9  -6   1   11.00   28.20
   9  -6  -1   35.20   20.00
   9  -6  -1   23.10   20.10
   9  -6  -1   30.10   20.70
  -9  -6   1   32.60   20.50
   9  -6  -1   36.00   20.80
  -9  -6   1   29.40   16.70
   9  -6  -1   28.40   19.00
  -9  -6   1   52.29   18.50
  -9  -6   1   23.80    6.50
  -9   6   1    9.90   21.50
   9   6  -1   31.10   21.90
   9   6  -1   10.40   24.70
   9   6  -1   -0.90   73.29
   9   6  -1   28.50   17.20
  -9   6   1   39.60   24.50
  -9   6   1   22.50   19.30
  -9   6   1    9.20   14.80
  -9   6   1   -6.90   18.20
  -9   6   1   27.70    8.20
  -9   6   1   42.10   16.50
   9   6  -1  -10.60   20.90
  -9   6   1   39.50   21.30
  -9   6   1    3.60   31.80
   9   6  -1   41.70   19.50
  -8  -6   1   51.79   23.00
   8  -6  -1   58.29   21.00
   8  -6  -1   65.99   21.10
  -8  -6   1   62.29   13.70
  -8  -6   1   56.49   27.70
  -8  -6   1   32.40   17.90
  -8  -6   1   78.49   19.70
  -8  -6   1   71.39   21.70
   8  -6  -1   67.29   21.80
   8  -6  -1   41.80   21.30
   8  -6  -1   84.79   23.70
  -8  -6   1   64.99   28.70
  -8  -6   1   41.30   27.70
   8  -6  -1   53.79   20.60
  -8  -6   1   78.09   24.90
   8   6  -1   49.70   28.00
  -8   6   1   45.10   22.70
  -8   6   1   41.30   20.70
  -8   6   1   22.50   19.90
   8   6  -1   65.69   22.20
   8   6  -1   42.60   23.80
  -8   6   1   41.70   17.10
   8   6  -1    2.00   74.09
  -8   6   1   36.10   10.80
  -8   6   1   43.10   23.30
  -8   6   1   25.00   23.40
   8   6  -1   31.40   14.90
   8   6  -1   53.19   26.70
   8   6  -1   47.30   15.40
  -8   6   1   88.59   21.00
  -7  -6   1  139.29   27.20
  -7  -6   1  183.68   32.50
   7  -6  -1  121.29   30.80
   7  -6  -1  129.99   28.90
  -7  -6   1  161.28   39.70
  -7  -6   1  122.49   26.10
   7  -6  -1  119.39   26.60
   7  -6  -1  122.29   29.90
   7  -6  -1  163.18   28.80
  -7  -6   1  139.19   34.10
  -7  -6   1  167.38   33.20
   7  -6  -1   97.79   24.40
  -7  -6   1  191.88   36.80
  -7  -6   1  120.39   22.80
  -7   6   1  136.59   20.70
  -7   6   1  147.29   33.10
   7   6  -1  110.19   32.90
  -7   6   1  140.59   30.10
   7   6  -1  156.48   25.00
  -7   6   1  158.18   26.70
   7   6  -1  145.49   31.30
  -7   6   1  177.68   37.00
  -7   6   1  131.29   32.50
  -7   6   1  164.28   26.50
  -7   6   1  169.38   26.90
   7   6  -1  154.88   21.90
  -7   6   1  167.18   33.70
   7   6  -1  137.19   35.20
   7   6  -1  125.49   33.20
   7   6  -1  143.59   26.40
   6  -6  -1   52.49   22.40
  -6  -6   1   56.99   24.00
  -6  -6   1   43.50   13.70
   6  -6  -1   40.50   17.60
   6  -6  -1   15.30   13.10
   6  -6  -1   41.40   19.40
  -6  -6   1   50.49   18.70
  -6  -6   1   50.29   17.00
   6  -6  -1   31.40   11.70
  -6  -6   1   31.10   20.10
  -6  -6   1   48.30   27.80
  -6  -6   1   23.40   13.60
   6  -6  -1   49.40   19.90
  -6  -6   1  -10.80   15.80
  -6  -6   1   40.10   14.30
   6  -6  -1   35.00    8.20
  -6  -6   1   33.80   18.60
  -6  -6   1   45.90   21.50
   6  -6  -1   19.90   14.20
  -6   6   1   37.20   17.70
  -6   6   1   21.90   13.50
  -6   6   1   34.10   11.50
   6   6  -1   33.30   24.70
  -6   6   1   30.50   22.70
   6   6  -1   11.50   12.20
  -6   6   1   39.60   13.00
  -6   6   1   -7.10   18.30
   6   6  -1   91.09   28.90
  -6   6   1   34.10   13.80
   6   6  -1   71.89   15.60
   6   6  -1   48.50   21.60
   6   6  -1   61.19   22.60
  -6   6   1   32.30   30.70
  -6   6   1   49.99   13.90
  -6   6   1   29.20   18.80
   6   6  -1   28.90   13.40
   6   6  -1  -18.80   61.79
  -6   6   1   15.60   16.00
   6   6  -1   23.40   19.20
   6   6  -1   42.70   15.00
  -6   6   1   38.70   14.00
   5  -6  -1  358.06   48.50
  -5  -6   1  206.38   39.90
  -5  -6   1  280.67   30.30
   5  -6  -1  283.77   37.70
   5  -6  -1  340.67   35.30
  -5  -6   1  238.88   32.10
  -5  -6   1  330.97   48.70
   5  -6  -1  325.77   33.90
   5  -6  -1  315.07   30.70
  -5  -6   1  270.47   34.20
   5  -6  -1  312.67   31.80
   5  -6  -1  291.67   34.00
   5  -6  -1  259.07   29.00
  -5  -6   1  303.47   42.20
  -5  -6   1  263.87   50.39
   5  -6  -1  265.87   35.30
  -5  -6   1  282.97   32.10
  -5  -6   1  290.87   37.00
   5   6  -1  331.07   44.80
   5   6  -1  279.57   48.70
  -5   6   1  276.07   41.90
  -5   6   1  316.37   44.90
  -5   6   1  270.27   35.10
  -5   6   1  325.67   31.90
  -5   6   1  250.07   32.20
   5   6  -1  285.17   50.29
   5   6  -1  258.57   31.60
  -5   6   1  208.88   42.50
  -5   6   1  277.97   44.30
   5   6  -1  330.77   45.70
  -5   6   1  308.07   31.20
  -5   6   1  302.27   31.50
   5   6  -1  345.07   31.70
   5   6  -1  249.58   45.30
  -5   6   1  220.88   42.60
   5   6  -1  263.87   31.60
   4  -6  -1    1.20   18.40
   4  -6  -1   -1.80   10.30
  -4  -6   1    5.90   11.90
  -4  -6   1    6.70   21.70
  -4  -6   1   21.40   14.70
  -4  -6   1    8.10   20.80
   4  -6  -1   -3.40   10.80
  -4  -6   1   -4.60   21.60
   4  -6  -1   30.10   15.00
  -4  -6   1   -3.90   12.20
  -4  -6   1   13.50   12.90
   4  -6  -1   -8.10   11.70
   4  -6  -1    9.70    9.80
   4  -6  -1    6.00   11.00
  -4  -6   1   17.30    9.90
  -4  -6   1    8.60   16.00
   4  -6  -1    8.20   17.70
   4  -6  -1  -12.00   15.20
  -4  -6   1   19.00   16.10
  -4   6   1   26.70   22.10
   4   6  -1  -11.50    8.90
   4   6  -1    5.30   13.70
   4   6  -1    6.90    9.50
  -4   6   1  -17.70   20.10
   4   6  -1   49.90   50.99
   4   6  -1   10.40   24.50
  -4   6   1    2.90   10.60
  -4   6   1   -7.90   15.30
   4   6  -1   12.30   18.90
  -4   6   1   23.80   11.30
  -4   6   1   40.50   30.20
   4   6  -1   42.90   21.60
  -4   6   1   -1.80   10.20
   4   6  -1   16.10   11.40
   4   6  -1   34.70   18.80
  -4   6   1   18.50   11.80
   4   6  -1   -0.50   20.60
  -4   6   1    5.60   18.30
  -4   6   1    9.00   10.60
  -4   6   1   24.10   11.00
  -4   6   1   22.80   10.80
  -3  -6   1  174.48   32.00
   3  -6  -1  120.09   21.70
  -3  -6   1  132.09   25.20
  -3  -6   1  199.38   38.50
  -3  -6   1  137.09   28.30
  -3  -6   1  147.19   21.20
   3  -6  -1  139.69   16.90
  -3  -6   1  144.39   25.60
  -3  -6   1  170.78   33.60
  -3  -6   1  156.68   36.20
   3  -6  -1  161.88   23.60
  -3  -6   1  164.08   26.40
   3  -6  -1  164.98   19.00
   3  -6  -1  170.48   30.20
   3  -6  -1  130.29   23.00
   3  -6  -1  110.89   21.80
   3  -6  -1  186.68   27.90
   3  -6  -1  175.18   35.10
   3  -6  -1  181.98   35.10
   3  -6  -1  210.58   27.00
  -3  -6   1   87.99   20.40
  -3   6   1  187.58   20.60
  -3   6   1  200.88   24.80
  -3   6   1  163.88   32.60
   3   6  -1  133.79   34.50
   3   6  -1  105.09   12.10
  -3   6   1  156.98   31.10
   3   6  -1  110.39   20.50
  -3   6   1  108.89   26.60
   3   6  -1  143.59   24.10
   3   6  -1   89.99   24.90
   3   6  -1  122.49   30.40
  -3   6   1  122.19   32.00
  -3   6   1  140.59   21.80
  -3   6   1  205.48   25.80
   3   6  -1  196.88   52.29
   3   6  -1  109.49   28.90
   3   6  -1  169.88   21.40
   3   6  -1  182.48   35.00
  -3   6   1  161.28   21.80
  -3   6   1  184.08   24.30
   3   6  -1  123.79   24.50
  -3   6   1  211.28   27.00
  -2  -6   1   88.69   21.10
   2  -6  -1   81.09   19.80
   2  -6  -1  126.59   30.80
  -2  -6   1  105.29   17.60
   2  -6  -1  108.29   22.30
  -2  -6   1  142.99   30.90
  -2  -6   1  127.69   24.70
  -2  -6   1  147.29   29.40
   2  -6  -1   90.79   24.20
   2  -6  -1  152.18   34.50
  -2  -6   1  167.58   35.40
  -2  -6   1   96.99   22.20
   2  -6  -1  116.69   20.20
   2  -6  -1  127.29   20.00
  -2  -6   1  118.89   33.30
  -2  -6   1  126.09   21.00
   2  -6  -1  126.89   18.30
   2  -6  -1   67.49   22.80
   2  -6  -1  112.69   18.90
   2  -6  -1  108.09   20.10
  -2  -6   1  111.09   25.00
   2   6  -1   81.69   26.30
  -2   6   1  131.69   30.80
  -2   6   1  108.39   20.00
   2   6  -1  110.29   19.40
  -2   6   1  138.99   20.90
   2   6  -1   99.89   20.20
   2   6  -1  172.78   35.40
  -2   6   1   94.69   24.70
   2   6  -1   70.29   29.80
  -2   6   1  105.59   18.60
   2   6  -1   96.19   13.40
  -2   6   1  136.19   20.10
   2   6  -1  127.69   17.70
  -2   6   1   88.39   28.30
  -2   6   1  103.39   22.80
   2   6  -1   95.49   25.50
   2   6  -1  133.29   22.50
  -2   6   1  151.78   22.70
   2   6  -1  135.79   25.80
  -2   6   1   93.09   29.90
   2   6  -1   81.19   31.50
  -2   6   1  111.49   17.30
   1  -6  -1  798.12   82.79
  -1  -6   1  734.53   83.19
   1  -6  -1  928.11   77.19
   1  -6  -1  994.00   78.69
   1  -6  -1  888.61   74.89
  -1  -6   1  883.41   83.99
   1  -6  -1  926.81   79.49
   1  -6  -1  857.01   74.49
  -1  -6   1  772.82   75.79
  -1  -6   1  858.41   80.19
  -1  -6   1  847.22   76.89
  -1  -6   1  749.42   73.99
   1  -6  -1  858.91   74.19
  -1  -6   1  876.51   75.19
   1  -6  -1  873.91   72.49
   1  -6  -1 1040.50   84.19
   1  -6  -1  897.11   75.09
  -1  -6   1  811.12   77.39
  -1  -6   1  733.43   74.39
  -1   6   1  863.01   76.49
   1   6  -1  754.82   77.69
   1   6  -1  766.42   83.69
  -1   6   1  852.51   73.79
   1   6  -1  691.23   75.39
   1   6  -1  754.22   81.69
   1   6  -1  808.12   74.19
   1   6  -1  700.63   88.29
  -1   6   1  769.62   79.59
   1   6  -1  760.42   80.79
  -1   6   1  919.11   75.39
   1   6  -1  888.81   74.19
   1   6  -1  909.71   72.69
  -1   6   1  915.31   73.99
  -1   6   1  905.01   83.39
   1   6  -1  741.63   77.59
  -1   6   1  858.71   72.69
  -1   6   1  643.04   80.69
  -1   6   1  832.82   77.99
  -1   6   1  861.71   74.89
   1   6  -1  887.31   75.29
   1   6  -1  864.51   70.79
  -1   6   1  989.60   73.69
   0  -6  -1  629.94   52.99
   0  -6   1  462.25   53.39
   0  -6   1  562.54   52.39
   0  -6  -1  643.74   60.29
   0  -6   1  510.95   50.49
   0  -6   1  407.86   49.50
   0  -6   1  583.94   59.49
   0  -6  -1  497.65   59.39
   0  -6   1  464.35   58.79
   0   6   1  506.55   55.39
   0   6   1  416.76   46.10
   0   6  -1  474.45   64.69
   0   6  -1  454.15   51.19
   0   6  -1  488.45   58.19
   0   6  -1  470.85   50.89
   0   6  -1  527.85   45.80
   0   6  -1  377.96   53.39
   0   6   1  610.44   52.29
   0   6   1  528.45   57.89
   0   6   1  633.14   61.49
   0   6   1  459.05   45.40
   1  -6   1   41.70   19.60
  -1  -6  -1   -3.70   25.00
   1  -6   1   10.10   14.40
   1  -6   1   18.90   14.50
  -1  -6  -1    9.60   13.10
   1  -6   1   71.89   25.80
   1  -6   1   41.40   17.20
   1  -6   1   63.99   27.00
  -1  -6  -1   28.30   12.30
   1  -6   1   25.00   12.00
  -1  -6  -1   36.90   12.90
   1  -6   1   35.50   14.90
  -1  -6  -1   43.40   12.70
  -1  -6  -1   25.10   24.40
  -1  -6  -1   25.80   16.50
  -1  -6  -1   20.60   20.60
  -1  -6  -1   40.10   16.40
   1  -6   1   35.70   10.90
  -1  -6  -1   25.50   15.40
   1  -6   1   13.60   14.80
  -1   6  -1   24.50   15.40
  -1   6  -1    9.70   17.90
   1   6   1   11.80   21.10
   1   6   1   38.40   14.80
  -1   6  -1   41.10   13.30
  -1   6  -1   35.20   13.00
   1   6   1   36.00   19.50
   1   6   1   54.29   13.00
  -1   6  -1   50.59   30.60
  -1   6  -1   39.00   26.00
   1   6   1   16.90   22.90
  -1   6  -1   36.40   12.70
   1   6   1   38.30   17.30
   1   6   1   22.90   11.30
   1   6   1   36.10   28.10
  -1   6  -1   38.70   22.90
   1   6   1   22.90   10.40
  -1   6  -1   40.30   24.50
  -1   6  -1   17.10   17.20
   1   6   1   25.70    8.30
   1   6   1   11.00   15.90
  -1   6  -1   11.20   11.90
   2  -6   1  288.67   30.30
   2  -6   1  328.97   50.19
   2  -6   1  245.58   31.00
   2  -6   1  309.27   32.20
   2  -6   1  364.46   48.70
  -2  -6  -1  269.77   29.50
   2  -6   1  330.27   33.90
  -2  -6  -1  265.87   30.80
   2  -6   1  301.77   32.10
  -2  -6  -1  283.57   46.00
  -2  -6  -1  266.67   34.80
  -2  -6  -1  298.07   37.40
  -2  -6  -1  257.57   32.10
   2  -6   1  323.47   30.40
   2  -6   1  369.06   37.40
   2  -6   1  283.77   30.00
  -2  -6  -1  237.28   46.20
  -2  -6  -1  231.78   30.20
  -2  -6  -1  255.67   33.10
  -2  -6  -1  318.17   37.60
   2  -6   1  372.66   37.00
  -2   6  -1  349.67   41.40
  -2   6  -1  297.47   47.60
   2   6   1  268.77   29.90
  -2   6  -1  255.27   42.30
   2   6   1  281.47   29.20
   2   6   1  257.27   43.40
  -2   6  -1  315.37   31.50
   2   6   1  249.78   30.70
   2   6   1  223.98   24.90
  -2   6  -1  290.47   30.50
  -2   6  -1  209.48   37.30
   2   6   1  262.37   39.70
   2   6   1  210.18   40.00
   2   6   1  298.47   38.40
  -2   6  -1  316.77   30.80
  -2   6  -1  246.78   30.50
  -2   6  -1  291.07   33.10
   2   6   1  306.67   48.80
   2   6   1  214.38   36.30
  -2   6  -1  232.98   40.50
  -2   6  -1  274.17   29.30
  -2   6  -1  299.67   32.20
  -3  -6  -1  107.79   32.00
   3  -6   1   85.49   29.30
   3  -6   1   58.49   16.10
  -3  -6  -1   87.19   19.60
  -3  -6  -1   70.69   19.60
  -3  -6  -1   64.99   17.10
  -3  -6  -1   94.59   28.60
  -3  -6  -1  138.59   29.30
   3  -6   1   69.39   16.70
   3  -6   1   86.89   17.50
  -3  -6  -1   80.69   16.80
   3  -6   1   91.49   19.10
  -3  -6  -1  142.79   29.60
   3  -6   1  104.49   21.00
   3  -6   1  113.99   24.80
   3  -6   1   77.29   21.90
   3  -6   1  122.09   28.80
  -3  -6  -1  102.49   21.50
  -3  -6  -1   96.09   23.20
   3  -6   1   82.29   14.60
  -3   6  -1   92.19   26.40
  -3   6  -1  102.19   16.80
  -3   6  -1   58.29   15.50
  -3   6  -1   56.79   30.20
   3   6   1   67.39   24.20
   3   6   1  100.99   17.60
  -3   6  -1   79.59   18.40
  -3   6  -1  118.29   31.50
   3   6   1  107.09   19.10
  -3   6  -1  132.59   30.20
   3   6   1   97.19   19.80
   3   6   1  115.69   30.70
  -3   6  -1   93.19   17.40
   3   6   1   70.09   23.60
  -3   6  -1   76.79   17.30
   3   6   1   93.99   24.20
  -3   6  -1   67.49   17.50
   3   6   1  119.89   31.70
  -3   6  -1   77.99   18.50
   3   6   1   90.49   21.60
  -4  -6  -1  275.57   33.70
   4  -6   1  234.98   30.00
  -4  -6  -1  275.37   34.10
   4  -6   1  308.87   48.50
  -4  -6  -1  247.18   28.40
   4  -6   1  203.08   27.30
  -4  -6  -1  245.58   29.20
  -4  -6  -1  325.07   44.30
  -4  -6  -1  270.47   44.20
   4  -6   1  250.77   30.10
   4  -6   1  298.17   33.60
   4  -6   1  311.37   44.20
   4  -6   1  240.38   23.80
  -4  -6  -1  229.08   31.20
  -4  -6  -1  225.78   32.20
   4  -6   1  262.17   30.30
  -4  -6  -1  363.96   47.60
   4  -6   1  255.37   38.20
   4  -6   1  214.68   29.30
  -4  -6  -1  244.38   46.40
   4   6   1  280.27   30.60
  -4   6  -1  289.97   43.30
   4   6   1  224.18   29.40
   4   6   1  262.07   43.40
  -4   6  -1  256.97   30.20
   4   6   1  271.57   28.80
  -4   6  -1  279.77   29.90
  -4   6  -1  241.78   29.10
   4   6   1  253.47   30.00
  -4   6  -1  287.37   29.40
   4   6   1  324.97   44.10
  -4   6  -1  327.67   41.00
  -4   6  -1  235.98   43.70
   4   6   1  282.67   39.70
  -4   6  -1  238.88   28.50
   4   6   1  217.08   38.80
   4   6   1  302.07   47.60
  -4   6  -1  231.18   29.50
  -4   6  -1  250.47   29.30
   4   6   1  177.68   60.89
  -4   6  -1  217.68   38.50
   5  -6   1   36.60   24.40
  -5  -6  -1   48.40   19.20
  -5  -6  -1   55.69   17.50
   5  -6   1   56.79   17.20
   5  -6   1   33.00   19.60
   5  -6   1   93.99   19.90
  -5  -6  -1   31.30   13.20
  -5  -6  -1   33.60   18.70
  -5  -6  -1   35.90   26.50
  -5  -6  -1   37.20   14.50
   5  -6   1   52.19   14.10
   5  -6   1   51.59   15.60
   5  -6   1   35.10   13.50
  -5  -6  -1   23.30   17.80
  -5  -6  -1   49.00   23.10
  -5  -6  -1   41.10   19.00
   5  -6   1   44.20   16.10
   5  -6   1   23.00   15.40
   5  -6   1  100.09   25.90
  -5  -6  -1   66.79   27.40
  -5   6  -1   40.70   12.70
   5   6   1   23.60   23.20
   5   6   1   43.30   24.40
   5   6   1   35.10   21.30
  -5   6  -1   54.29   14.40
  -5   6  -1   57.89   15.30
  -5   6  -1   -2.70   19.30
   5   6   1   53.69   13.20
  -5   6  -1   43.80   14.50
  -5   6  -1   45.10   15.90
   5   6   1   23.10   20.00
  -5   6  -1   25.60   13.20
  -5   6  -1   56.29   26.50
   5   6   1   19.90   18.30
   5   6   1   49.20   57.39
   5   6   1   58.09   16.40
   5   6   1   18.00   12.30
  -5   6  -1   50.09   25.00
  -5   6  -1   46.70   18.20
   5   6   1   40.10   15.50
  -6  -6  -1  265.77   51.19
  -6  -6  -1  342.47   41.20
   6  -6   1  296.47   30.30
  -6  -6  -1  288.07   40.30
   6  -6   1  312.77   38.10
   6  -6   1  303.17   34.50
  -6  -6  -1  292.77   38.40
  -6  -6  -1  256.07   33.40
   6  -6   1  322.87   37.20
  -6  -6  -1  340.57   41.70
   6  -6   1  301.37   32.80
   6  -6   1  308.27   36.30
  -6  -6  -1  276.17   36.40
  -6  -6  -1  341.97   44.70
   6  -6   1  312.57   40.70
   6  -6   1  307.17   37.60
  -6  -6  -1  391.46   50.49
  -6  -6  -1  361.76   45.10
   6  -6   1  354.26   43.70
  -6  -6  -1  300.67   34.30
   6   6   1  271.37   34.60
   6   6   1  310.97   31.90
  -6   6  -1  314.37   30.70
  -6   6  -1  328.37   52.19
  -6   6  -1  346.97   36.30
  -6   6  -1  364.36   36.40
  -6   6  -1  282.37   34.90
  -6   6  -1  318.27   35.10
   6   6   1  373.56   55.29
   6   6   1  223.88   95.89
   6   6   1  353.06   48.10
   6   6   1  348.27   37.30
  -6   6  -1  332.67   36.30
  -6   6  -1  327.47   40.00
   6   6   1  333.07   48.40
  -6   6  -1  334.67   43.00
   6   6   1  261.67   34.70
   6   6   1  327.37   52.39
   6   6   1  318.77   42.30
  -6   6  -1  346.17   51.89
  -6   6  -1  289.37   35.80
  -7  -6  -1  115.19   35.80
   7  -6   1  115.89   32.30
  -7  -6  -1  163.08   30.10
   7  -6   1  127.59   17.50
   7  -6   1  149.79   29.20
   7  -6   1  168.28   33.00
   7  -6   1  176.58   30.90
  -7  -6  -1  180.18   33.30
   7  -6   1  156.58   28.10
   7  -6   1  180.48   23.20
   7  -6   1  168.38   32.00
  -7  -6  -1  179.28   28.30
   7  -6   1  167.28   21.50
  -7  -6  -1  218.08   30.00
  -7  -6  -1  167.68   33.40
  -7  -6  -1  156.28   19.90
  -7  -6  -1  160.38   31.40
  -7  -6  -1  153.18   33.40
   7   6   1  242.88   44.30
  -7   6  -1  166.68   32.80
  -7   6  -1  213.38   42.50
  -7   6  -1  172.28   30.10
   7   6   1  163.58   28.60
   7   6   1  181.48   39.50
  -7   6  -1  227.48   41.20
   7   6   1   56.99   72.39
  -7   6  -1  181.68   32.50
   7   6   1  138.49   25.50
   7   6   1  166.78   35.30
   7   6   1  144.09   33.30
   7   6   1  197.18   24.00
  -7   6  -1  224.18   35.40
  -7   6  -1  151.98   27.40
  -8  -6  -1  -15.20   13.40
   8  -6   1    6.00   17.20
  -8  -6  -1    7.30   23.70
  -8  -6  -1  -34.90   11.40
  -8  -6  -1   -9.30   14.40
   8  -6   1   -5.20   13.70
   8  -6   1   -0.30   14.90
  -8  -6  -1   13.20   17.80
  -8  -6  -1  -11.00   21.50
  -8  -6  -1    1.70    4.10
   8  -6   1   45.10   35.50
  -8  -6  -1  -13.20   15.80
  -8   6  -1   34.20   24.50
   8   6   1   21.50   23.40
   8   6   1  -25.10   20.60
   8   6   1    0.70   12.20
  -8   6  -1   12.40   25.80
   8   6   1   29.30   18.90
   8   6   1   16.90   20.10
  -8   6  -1  -19.20   15.20
   8   6   1   21.70   73.29
   8   6   1   14.10   16.60
  -8   6  -1   -3.70   21.10
  -8   6  -1   -1.00   16.90
  -8   6  -1    6.00   15.90
  -8   6  -1   -3.80   17.00
   9  -6   1   23.70   20.10
   9  -6   1    1.40   18.70
  -9  -6  -1   15.00   20.00
   9  -6   1   11.60   15.40
  -9  -6  -1   49.99   30.00
  -9  -6  -1   12.00   15.50
  -9  -6  -1   26.00   18.20
  -9  -6  -1   10.30    5.70
   9  -6   1   19.60   22.40
  -9  -6  -1   17.40   21.50
  -9  -6  -1  -18.10   17.60
   9  -6   1    0.20   20.10
  -9   6  -1  -38.20   19.20
   9   6   1   55.39   28.40
   9   6   1   24.90   28.70
  -9   6  -1   -5.70   18.90
  -9   6  -1    8.70   18.90
  -9   6  -1   13.10   24.70
   9   6   1   14.00   78.39
  -9   6  -1   23.20   17.40
  -9   6  -1  -24.40   17.10
   9   6   1   -5.60   14.90
   9   6   1   21.30   19.60
   9   6   1   13.70   21.40
  -9   6  -1   20.50   19.30
 -10  -6  -1   45.40   20.40
 -10  -6  -1   52.29   25.10
  10  -6   1   27.40   21.80
  10  -6   1   34.00   22.20
 -10  -6  -1   14.20   31.90
 -10  -6  -1   61.59   27.60
  10  -6   1   14.00   20.80
 -10  -6  -1   31.30   22.50
  10  -6   1   31.50   21.90
  10  -6   1   89.99   26.50
 -10   6  -1   53.19   29.80
  10   6   1   52.99   20.30
 -10   6  -1   38.30   19.60
 -10   6  -1   -3.80   20.90
 -10   6  -1    7.60   22.50
 -10   6  -1    2.20   19.10
  10   6   1   66.29   24.00
  10   6   1   95.19   37.10
  10   6   1   36.70   27.40
 -10   6  -1   34.10   19.10
  10   6   1   78.09   19.90
  11  -6   1   76.09   26.00
 -11  -6  -1   38.00   30.80
 -11  -6  -1   93.39   35.50
  11  -6   1   52.19   25.60
 -11  -6  -1   50.69   12.60
  11  -6   1  102.89   30.30
 -11  -6  -1   81.99   40.80
 -11  -6  -1  132.39   32.80
  11  -6   1   57.59   25.50
 -11  -6  -1  113.59   32.30
  11  -6   1   56.09   26.10
 -11  -6  -1   91.29   25.90
 -11   6  -1   41.60   26.70
  11   6   1   96.49   28.70
 -11   6  -1  149.88   44.80
 -11   6  -1   58.39   46.60
 -11   6  -1  168.98   36.20
  11   6   1  144.99   45.20
  11   6   1  117.29   20.50
 -11   6  -1   66.19   33.90
  11   6   1  128.19   32.80
 -12  -6  -1  -15.80   41.70
 -12  -6  -1   63.19   37.60
  12   6   1   51.49   33.10
 -12   6  -1   51.59   30.60
 -12   6  -1   30.30   32.00
 -13  -6  -1   -2.70    8.90
 -13  -6  -1   17.80   26.10
  13  -6   1   -6.10   19.90
 -13  -6  -1   16.80   30.70
  13  -6   1   -9.90   21.50
 -13  -6  -1   21.60   28.60
 -13  -6  -1   11.20   18.40
 -13  -6  -1   13.50   20.00
 -13   6  -1  -10.30   25.90
 -13   6  -1  -21.20   21.10
 -13   6  -1   56.19   26.00
  13   6   1   54.19   24.10
 -13   6  -1    4.30   25.10
  13   6   1   -6.10   31.90
 -13   6  -1   12.10   23.70
  13   6   1   15.30   24.60
 -14  -6  -1   -0.90   22.70
 -14  -6  -1   55.09   39.20
 -14  -6  -1   50.19   26.90
 -14  -6  -1   27.00   28.80
  14  -6   1   -7.30   19.80
 -14  -6  -1   34.30   27.20
  14  -6   1   32.90   26.90
 -14   6  -1  -24.30   28.30
 -14   6  -1    4.90   25.80
 -14   6  -1  -12.80   28.90
  14   6   1   30.40   25.90
  14   6   1    2.60   36.10
 -14   6  -1    7.40   26.00
 -14   6  -1   -8.70   19.90
  14   6   1   33.20   28.70
 -15  -7   1   33.70   34.60
 -15  -7   1   37.60   27.30
  15  -7  -1   32.50   32.90
  15  -7  -1  -33.60   18.70
 -15  -7   1   -2.40   33.30
 -15  -7   1   49.00   23.40
 -15   7   1   45.90   31.40
 -15   7   1  -16.60   24.20
 -15   7   1   13.70   24.30
 -15   7   1    3.30   20.90
  15   7  -1    6.70   32.20
 -15   7   1    4.10   26.40
  15   7  -1   90.99   48.00
 -14  -7   1  -32.60   17.70
  14  -7  -1  -19.60   19.20
 -14  -7   1   41.00   33.20
  14  -7  -1   -1.00   22.00
 -14  -7   1   13.20   22.60
 -14  -7   1   19.30   26.20
 -14  -7   1  -13.40   15.00
  14   7  -1   65.19  141.19
 -14   7   1   34.70   23.90
  14   7  -1   -9.10   28.80
  14   7  -1   67.19   29.00
 -14   7   1   -9.30   26.70
 -14   7   1   10.80   22.50
 -14   7   1   -1.50   27.30
  14   7  -1    6.40   38.20
 -14   7   1  -18.40   24.40
 -13  -7   1   38.80   21.60
  13  -7  -1   -2.30   20.90
  13  -7  -1  -14.40   19.50
  13  -7  -1  -24.20   31.10
 -13  -7   1  -11.20   23.10
  13  -7  -1    3.10   23.40
 -13  -7   1    1.50   21.40
 -13  -7   1   -1.10   16.60
 -13  -7   1  -32.20   28.00
 -13   7   1   27.20   27.80
  13   7  -1   -8.30   30.30
 -13   7   1   -1.80   14.40
 -13   7   1  -33.10   22.60
  13   7  -1    5.20   25.00
 -13   7   1   21.30   23.50
 -13   7   1  -18.90   23.20
  12  -7  -1   38.20   26.40
 -12  -7   1   41.70   28.90
  12  -7  -1  -18.70   19.20
 -12  -7   1   44.60   20.60
 -12  -7   1  -19.70   28.70
  12  -7  -1   25.40   21.40
 -12  -7   1   31.60   22.90
  12  -7  -1   35.70   25.00
 -12  -7   1   62.99   32.60
[truncated: 5,531,542 more chars]
