# Supplementary material for: Nucleophilic Substitution at a Coordinatively Saturated Five-Membered NHC∙Haloborane Centre
Source: MDPI journal article supplement (doi:10.3390/inorganics10070097), 2022-07-07
Supplement: s1 [file s1 › cif_2.cif]

data_mo_gar_79_0m_a
_audit_creation_date               2022-06-05
_audit_creation_method
;
Olex2 1.5
(compiled 2021.08.20 svn.r13c46975 for OlexSys, GUI svn.r6405)
;
_shelx_SHELXL_version_number       '2016/6'
_audit_contact_author_address      ?
_audit_contact_author_email        ?
_audit_contact_author_name         ''
_audit_contact_author_phone        ?
_publ_contact_author_id_orcid      ?
_publ_section_references
;
Dolomanov, O.V., Bourhis, L.J., Gildea, R.J, Howard, J.A.K. & Puschmann, H.
 (2009), J. Appl. Cryst. 42, 339-341.

Sheldrick, G.M. (2015). Acta Cryst. C71, 3-8.
;
_chemical_name_common              ?
_chemical_name_systematic          ?
_chemical_formula_moiety           'C33 H43 B Cl2 N2'
_chemical_formula_sum              'C33 H43 B Cl2 N2'
_chemical_formula_weight           549.40
_chemical_melting_point            ?
loop_
  _atom_type_symbol
  _atom_type_description
  _atom_type_scat_dispersion_real
  _atom_type_scat_dispersion_imag
  _atom_type_scat_source
 'C' 'C' 0.0033 0.0016 'International Tables Vol C Tables 4.2.6.8 and 6.1.1.4'
 'H' 'H' 0.0000 0.0000 'International Tables Vol C Tables 4.2.6.8 and 6.1.1.4'
 'B' 'B' 0.0013 0.0007 'International Tables Vol C Tables 4.2.6.8 and 6.1.1.4'
 'Cl' 'Cl' 0.1484 0.1585 'International Tables Vol C Tables 4.2.6.8 and 6.1.1.4'
 'N' 'N' 0.0061 0.0033 'International Tables Vol C Tables 4.2.6.8 and 6.1.1.4'

_shelx_space_group_comment
;
The symmetry employed for this shelxl refinement is uniquely defined
by the following loop, which should always be used as a source of
symmetry information in preference to the above space-group names.
They are only intended as comments.
;
_space_group_crystal_system        'monoclinic'
_space_group_IT_number             14
_space_group_name_H-M_alt          'P 1 21/n 1'
_space_group_name_Hall             '-P 2yn'
loop_
  _space_group_symop_operation_xyz
 'x, y, z'
 '-x+1/2, y+1/2, -z+1/2'
 '-x, -y, -z'
 'x-1/2, -y-1/2, z-1/2'

_cell_length_a                     11.8231(7)
_cell_length_b                     18.7331(11)
_cell_length_c                     14.2604(8)
_cell_angle_alpha                  90
_cell_angle_beta                   106.906(2)
_cell_angle_gamma                  90
_cell_volume                       3021.9(3)
_cell_formula_units_Z              4
_cell_measurement_reflns_used      9869
_cell_measurement_temperature      100(2)
_cell_measurement_theta_max        36.34
_cell_measurement_theta_min        2.26
_shelx_estimated_absorpt_T_max     0.981
_shelx_estimated_absorpt_T_min     0.972
_exptl_absorpt_coefficient_mu      0.239
_exptl_absorpt_correction_T_max    0.7471
_exptl_absorpt_correction_T_min    0.6928
_exptl_absorpt_correction_type     multi-scan
_exptl_absorpt_process_details    
 'SADABS-2016/2 (Bruker,2016/2) was used for absorption correction. wR2(int) was 0.1216 before and 0.0676 after correction. The Ratio of minimum to maximum transmission is 0.9273. The \l/2 correction factor is Not present.'
_exptl_absorpt_special_details     ?
_exptl_crystal_colour              colourless
_exptl_crystal_colour_primary      colourless
_exptl_crystal_density_diffrn      1.208
_exptl_crystal_density_meas        ?
_exptl_crystal_density_method      ?
_exptl_crystal_description         block
_exptl_crystal_F_000               1176
_exptl_crystal_size_max            0.12
_exptl_crystal_size_mid            0.12
_exptl_crystal_size_min            0.08
_exptl_transmission_factor_max     ?
_exptl_transmission_factor_min     ?
_diffrn_reflns_av_R_equivalents    0.0564
_diffrn_reflns_av_unetI/netI       0.0270
_diffrn_reflns_Laue_measured_fraction_full  0.997
_diffrn_reflns_Laue_measured_fraction_max  0.996
_diffrn_reflns_limit_h_max         19
_diffrn_reflns_limit_h_min         -19
_diffrn_reflns_limit_k_max         31
_diffrn_reflns_limit_k_min         -31
_diffrn_reflns_limit_l_max         23
_diffrn_reflns_limit_l_min         -23
_diffrn_reflns_number              134803
_diffrn_reflns_point_group_measured_fraction_full  0.997
_diffrn_reflns_point_group_measured_fraction_max  0.996
_diffrn_reflns_theta_full          25.242
_diffrn_reflns_theta_max           36.376
_diffrn_reflns_theta_min           1.976
_diffrn_ambient_temperature        100.0
_diffrn_detector_area_resol_mean   ?
_diffrn_measured_fraction_theta_full  0.997
_diffrn_measured_fraction_theta_max  0.996
_diffrn_measurement_device_type    'Bruker APEX-II CCD'
_diffrn_measurement_method         '\f and \w scans'
_diffrn_radiation_type             MoK\a
_diffrn_radiation_wavelength       0.71073
_diffrn_source                     ?
_diffrn_standards_number           0
_reflns_Friedel_coverage           0.000
_reflns_Friedel_fraction_full      .
_reflns_Friedel_fraction_max       .
_reflns_number_gt                  13012
_reflns_number_total               14650
_reflns_special_details
;
 Reflections were merged by SHELXL according to the crystal
 class for the calculation of statistics and refinement.
 
 _reflns_Friedel_fraction is defined as the number of unique
 Friedel pairs measured divided by the number that would be
 possible theoretically, ignoring centric projections and
 systematic absences.
;
_reflns_threshold_expression       'I > 2\s(I)'
_computing_cell_refinement         'SAINT V8.40A (?, 2016)'
_computing_data_collection         ?
_computing_data_reduction          'SAINT V8.40A (?, 2016)'
_computing_molecular_graphics      'Olex2 1.5 (Dolomanov et al., 2009)'
_computing_publication_material    'Olex2 1.5 (Dolomanov et al., 2009)'
_computing_structure_refinement    'ShelXL (Sheldrick, 2015)'
_computing_structure_solution      'SHELXT 2014/5 (Sheldrick, 2014)'
_refine_diff_density_max           0.607
_refine_diff_density_min           -0.525
_refine_diff_density_rms           0.161
_refine_ls_extinction_coef         .
_refine_ls_extinction_method       none
_refine_ls_goodness_of_fit_ref     1.107
_refine_ls_hydrogen_treatment      constr
_refine_ls_matrix_type             full
_refine_ls_number_parameters       351
_refine_ls_number_reflns           14650
_refine_ls_number_restraints       0
_refine_ls_R_factor_all            0.0424
_refine_ls_R_factor_gt             0.0349
_refine_ls_restrained_S_all        1.107
_refine_ls_shift/su_max            0.002
_refine_ls_shift/su_mean           0.000
_refine_ls_structure_factor_coef   Fsqd
_refine_ls_weighting_details      
 'w=1/[\s^2^(Fo^2^)+(0.0537P)^2^+0.7232P] where P=(Fo^2^+2Fc^2^)/3'
_refine_ls_weighting_scheme        calc
_refine_ls_wR_factor_gt            0.0984
_refine_ls_wR_factor_ref           0.1074
_refine_special_details            ?
_olex2_refinement_description
;
1.a Ternary CH refined with riding coordinates:
 C2(H2), C8(H8), C11(H11), C28(H28)
1.b Secondary CH2 refined with riding coordinates:
 C18(H18A,H18B), C19(H19A,H19B)
1.c Aromatic/amide H refined with riding coordinates:
 C14(H14), C15(H15), C16(H16), C22(H22), C23(H23), C24(H24), C25(H25),
 C26(H26), C31(H31), C32(H32), C33(H33)
1.d Idealised Me refined as rotating group:
 C1(H1A,H1B,H1C), C9(H9A,H9B,H9C), C10(H10A,H10B,H10C), C12(H12A,H12B,H12C),
 C17(H17A,H17B,H17C), C29(H29A,H29B,H29C), C30(H30A,H30B,H30C), C34(H34A,H34B,
 H34C)
;
_atom_sites_solution_hydrogens     geom
_atom_sites_solution_primary       ?
_atom_sites_solution_secondary     ?
loop_
  _atom_site_label
  _atom_site_type_symbol
  _atom_site_fract_x
  _atom_site_fract_y
  _atom_site_fract_z
  _atom_site_U_iso_or_equiv
  _atom_site_adp_type
  _atom_site_occupancy
  _atom_site_site_symmetry_order
  _atom_site_calc_flag
  _atom_site_refinement_flags_posn
  _atom_site_refinement_flags_adp
  _atom_site_refinement_flags_occupancy
  _atom_site_disorder_assembly
  _atom_site_disorder_group
 Cl1 Cl 0.22305(2) 0.82376(2) 0.16057(2) 0.01503(4) Uani 1 1 d . . . . .
 Cl2 Cl 0.39921(2) 0.73471(2) 0.09537(2) 0.01480(4) Uani 1 1 d . . . . .
 N1 N 0.51086(5) 0.77083(3) 0.32559(4) 0.01007(9) Uani 1 1 d . . . . .
 N2 N 0.35555(5) 0.75532(3) 0.37639(4) 0.00975(9) Uani 1 1 d . . . . .
 C1 C 0.73521(8) 0.60502(5) 0.40175(7) 0.02312(15) Uani 1 1 d . . . . .
 H1A H 0.796482 0.590420 0.371890 0.035 Uiso 1 1 calc GR . . . .
 H1B H 0.710791 0.563727 0.433350 0.035 Uiso 1 1 calc GR . . . .
 H1C H 0.766666 0.642151 0.450819 0.035 Uiso 1 1 calc GR . . . .
 C2 C 0.62839(7) 0.63436(4) 0.32231(7) 0.01847(13) Uani 1 1 d . . . . .
 H2 H 0.565991 0.646819 0.354168 0.022 Uiso 1 1 calc R . . . .
 C3 C 0.65896(6) 0.70177(4) 0.27557(5) 0.01328(11) Uani 1 1 d . . . . .
 C4 C 0.60005(6) 0.76694(4) 0.27522(5) 0.01050(10) Uani 1 1 d . . . . .
 C5 C 0.39692(6) 0.75121(3) 0.29816(5) 0.00853(9) Uani 1 1 d . . . . .
 C6 C 0.24822(6) 0.72721(4) 0.39036(5) 0.00996(10) Uani 1 1 d . . . . .
 C7 C 0.24256(6) 0.65319(4) 0.40642(5) 0.01142(10) Uani 1 1 d . . . . .
 C8 C 0.34130(6) 0.60261(4) 0.40215(6) 0.01502(12) Uani 1 1 d . . . . .
 H8 H 0.381113 0.623627 0.355551 0.018 Uiso 1 1 calc R . . . .
 C9 C 0.29763(8) 0.52826(4) 0.36390(6) 0.01843(13) Uani 1 1 d . . . . .
 H9A H 0.268212 0.503359 0.412559 0.028 Uiso 1 1 calc GR . . . .
 H9B H 0.362992 0.501045 0.352153 0.028 Uiso 1 1 calc GR . . . .
 H9C H 0.233703 0.532735 0.302478 0.028 Uiso 1 1 calc GR . . . .
 C10 C 0.05502(8) 0.88541(6) 0.31293(7) 0.02588(17) Uani 1 1 d . . . . .
 H10A H 0.042198 0.860490 0.250277 0.039 Uiso 1 1 calc GR . . . .
 H10B H 0.066674 0.936442 0.303739 0.039 Uiso 1 1 calc GR . . . .
 H10C H -0.014063 0.878817 0.336825 0.039 Uiso 1 1 calc GR . . . .
 C11 C 0.16509(7) 0.85485(4) 0.38805(6) 0.01532(12) Uani 1 1 d . . . . .
 H11 H 0.235887 0.866657 0.366086 0.018 Uiso 1 1 calc R . . . .
 C12 C 0.18054(9) 0.88959(5) 0.48874(7) 0.02229(15) Uani 1 1 d . . . . .
 H12A H 0.116285 0.874208 0.514680 0.033 Uiso 1 1 calc GR . . . .
 H12B H 0.178620 0.941656 0.481767 0.033 Uiso 1 1 calc GR . . . .
 H12C H 0.256551 0.875037 0.533928 0.033 Uiso 1 1 calc GR . . . .
 C13 C 0.15858(6) 0.77429(4) 0.39743(5) 0.01214(10) Uani 1 1 d . . . . .
 C14 C 0.14276(7) 0.62719(4) 0.42828(6) 0.01560(12) Uani 1 1 d . . . . .
 H14 H 0.136804 0.577570 0.439778 0.019 Uiso 1 1 calc R . . . .
 C15 C 0.05192(7) 0.67243(5) 0.43357(6) 0.01843(13) Uani 1 1 d . . . . .
 H15 H -0.015746 0.653572 0.447954 0.022 Uiso 1 1 calc R . . . .
 C16 C 0.05956(7) 0.74488(4) 0.41797(6) 0.01657(12) Uani 1 1 d . . . . .
 H16 H -0.003529 0.775254 0.421244 0.020 Uiso 1 1 calc R . . . .
 C17 C 0.43426(9) 0.59696(5) 0.50209(8) 0.0285(2) Uani 1 1 d . . . . .
 H17A H 0.465606 0.644547 0.523670 0.043 Uiso 1 1 calc GR . . . .
 H17B H 0.498765 0.565866 0.496754 0.043 Uiso 1 1 calc GR . . . .
 H17C H 0.397982 0.576848 0.549877 0.043 Uiso 1 1 calc GR . . . .
 C18 C 0.44218(6) 0.78806(4) 0.46158(5) 0.01312(11) Uani 1 1 d . . . . .
 H18A H 0.449956 0.760044 0.521990 0.016 Uiso 1 1 calc R . . . .
 H18B H 0.419798 0.837709 0.472030 0.016 Uiso 1 1 calc R . . . .
 C19 C 0.55533(6) 0.78596(4) 0.43195(5) 0.01321(11) Uani 1 1 d . . . . .
 H19A H 0.597374 0.832269 0.444564 0.016 Uiso 1 1 calc R . . . .
 H19B H 0.608834 0.747710 0.467062 0.016 Uiso 1 1 calc R . . . .
 B20 B 0.31044(7) 0.73722(4) 0.18453(5) 0.01063(11) Uani 1 1 d . . . . .
 C21 C 0.22136(6) 0.66950(4) 0.16459(5) 0.01045(10) Uani 1 1 d . . . . .
 C22 C 0.11127(6) 0.67174(4) 0.18365(5) 0.01242(11) Uani 1 1 d . . . . .
 H22 H 0.089860 0.713524 0.212190 0.015 Uiso 1 1 calc R . . . .
 C23 C 0.03258(6) 0.61455(4) 0.16197(5) 0.01503(12) Uani 1 1 d . . . . .
 H23 H -0.040239 0.617461 0.177382 0.018 Uiso 1 1 calc R . . . .
 C24 C 0.05983(7) 0.55320(4) 0.11791(6) 0.01706(12) Uani 1 1 d . . . . .
 H24 H 0.005821 0.514420 0.102274 0.020 Uiso 1 1 calc R . . . .
 C25 C 0.16750(7) 0.54973(4) 0.09722(6) 0.01732(13) Uani 1 1 d . . . . .
 H25 H 0.187277 0.508325 0.066873 0.021 Uiso 1 1 calc R . . . .
 C26 C 0.24677(6) 0.60672(4) 0.12074(5) 0.01385(11) Uani 1 1 d . . . . .
 H26 H 0.320284 0.602931 0.106653 0.017 Uiso 1 1 calc R . . . .
 C27 C 0.63424(6) 0.82992(4) 0.23797(5) 0.01247(11) Uani 1 1 d . . . . .
 C28 C 0.58059(7) 0.90206(4) 0.24793(6) 0.01635(12) Uani 1 1 d . . . . .
 H28 H 0.519927 0.894852 0.283422 0.020 Uiso 1 1 calc R . . . .
 C29 C 0.67617(9) 0.95189(5) 0.30983(9) 0.02749(18) Uani 1 1 d . . . . .
 H29A H 0.709494 0.931284 0.375230 0.041 Uiso 1 1 calc GR . . . .
 H29B H 0.641227 0.998519 0.315641 0.041 Uiso 1 1 calc GR . . . .
 H29C H 0.738922 0.957748 0.278208 0.041 Uiso 1 1 calc GR . . . .
 C30 C 0.51902(10) 0.93560(5) 0.14825(8) 0.02909(19) Uani 1 1 d . . . . .
 H30A H 0.576364 0.941988 0.111251 0.044 Uiso 1 1 calc GR . . . .
 H30B H 0.486167 0.982089 0.158057 0.044 Uiso 1 1 calc GR . . . .
 H30C H 0.455099 0.904199 0.111616 0.044 Uiso 1 1 calc GR . . . .
 C31 C 0.72441(7) 0.82531(4) 0.19308(6) 0.01654(12) Uani 1 1 d . . . . .
 H31 H 0.747483 0.866837 0.165086 0.020 Uiso 1 1 calc R . . . .
 C32 C 0.78083(7) 0.76088(5) 0.18878(6) 0.01916(14) Uani 1 1 d . . . . .
 H32 H 0.841095 0.758408 0.157033 0.023 Uiso 1 1 calc R . . . .
 C33 C 0.74921(7) 0.70015(4) 0.23083(6) 0.01760(13) Uani 1 1 d . . . . .
 H33 H 0.789829 0.656637 0.229098 0.021 Uiso 1 1 calc R . . . .
 C34 C 0.57794(9) 0.57721(5) 0.24508(10) 0.0333(2) Uani 1 1 d . . . . .
 H34A H 0.507452 0.595850 0.196522 0.050 Uiso 1 1 calc GR . . . .
 H34B H 0.556609 0.534936 0.276713 0.050 Uiso 1 1 calc GR . . . .
 H34C H 0.637400 0.564178 0.212460 0.050 Uiso 1 1 calc GR . . . .

loop_
  _atom_site_aniso_label
  _atom_site_aniso_U_11
  _atom_site_aniso_U_22
  _atom_site_aniso_U_33
  _atom_site_aniso_U_23
  _atom_site_aniso_U_13
  _atom_site_aniso_U_12
 Cl1 0.01675(8) 0.01327(7) 0.01322(7) 0.00260(5) 0.00146(5) 0.00352(5)
 Cl2 0.01393(7) 0.02181(8) 0.00984(7) -0.00118(5) 0.00531(5) -0.00323(5)
 N1 0.0075(2) 0.0135(2) 0.0092(2) -0.00124(17) 0.00244(16) -0.00133(16)
 N2 0.0082(2) 0.0131(2) 0.0081(2) -0.00121(16) 0.00259(16) -0.00192(17)
 C1 0.0220(4) 0.0217(3) 0.0252(4) 0.0053(3) 0.0061(3) 0.0009(3)
 C2 0.0127(3) 0.0124(3) 0.0316(4) 0.0014(3) 0.0084(3) 0.0003(2)
 C3 0.0105(2) 0.0126(3) 0.0173(3) -0.0018(2) 0.0049(2) 0.0000(2)
 C4 0.0078(2) 0.0126(2) 0.0117(2) -0.00143(19) 0.00384(19) -0.00088(18)
 C5 0.0082(2) 0.0088(2) 0.0086(2) 0.00021(17) 0.00238(17) -0.00006(17)
 C6 0.0081(2) 0.0134(2) 0.0085(2) 0.00029(18) 0.00272(18) -0.00123(18)
 C7 0.0107(2) 0.0134(2) 0.0096(2) 0.00088(19) 0.00216(19) -0.0019(2)
 C8 0.0128(3) 0.0132(3) 0.0180(3) 0.0029(2) 0.0028(2) 0.0004(2)
 C9 0.0214(3) 0.0146(3) 0.0173(3) 0.0007(2) 0.0026(3) 0.0007(2)
 C10 0.0206(4) 0.0298(4) 0.0282(4) 0.0103(3) 0.0085(3) 0.0114(3)
 C11 0.0150(3) 0.0158(3) 0.0169(3) 0.0017(2) 0.0075(2) 0.0035(2)
 C12 0.0282(4) 0.0188(3) 0.0243(4) -0.0051(3) 0.0145(3) -0.0012(3)
 C13 0.0101(2) 0.0159(3) 0.0111(2) -0.0002(2) 0.00416(19) 0.0004(2)
 C14 0.0151(3) 0.0171(3) 0.0154(3) 0.0001(2) 0.0058(2) -0.0053(2)
 C15 0.0138(3) 0.0236(3) 0.0202(3) -0.0021(3) 0.0086(2) -0.0058(2)
 C16 0.0113(3) 0.0221(3) 0.0183(3) -0.0013(2) 0.0075(2) -0.0011(2)
 C17 0.0224(4) 0.0211(4) 0.0303(4) -0.0006(3) -0.0107(3) 0.0034(3)
 C18 0.0112(3) 0.0184(3) 0.0096(2) -0.0041(2) 0.00285(19) -0.0036(2)
 C19 0.0094(2) 0.0201(3) 0.0092(2) -0.0026(2) 0.00129(19) -0.0029(2)
 B20 0.0102(3) 0.0127(3) 0.0085(3) 0.0001(2) 0.0021(2) -0.0003(2)
 C21 0.0089(2) 0.0130(2) 0.0083(2) -0.00013(18) 0.00078(18) -0.00022(18)
 C22 0.0101(2) 0.0162(3) 0.0100(2) -0.0012(2) 0.00144(19) -0.0008(2)
 C23 0.0107(3) 0.0198(3) 0.0136(3) -0.0001(2) 0.0019(2) -0.0030(2)
 C24 0.0159(3) 0.0166(3) 0.0164(3) -0.0009(2) 0.0012(2) -0.0047(2)
 C25 0.0179(3) 0.0140(3) 0.0186(3) -0.0036(2) 0.0031(2) -0.0014(2)
 C26 0.0120(3) 0.0144(3) 0.0145(3) -0.0024(2) 0.0028(2) 0.0002(2)
 C27 0.0110(3) 0.0134(3) 0.0141(3) -0.0002(2) 0.0053(2) -0.0008(2)
 C28 0.0164(3) 0.0127(3) 0.0227(3) 0.0014(2) 0.0101(2) 0.0004(2)
 C29 0.0264(4) 0.0187(3) 0.0411(5) -0.0103(3) 0.0156(4) -0.0068(3)
 C30 0.0325(5) 0.0248(4) 0.0312(5) 0.0109(3) 0.0112(4) 0.0108(3)
 C31 0.0151(3) 0.0189(3) 0.0188(3) 0.0015(2) 0.0099(2) -0.0008(2)
 C32 0.0167(3) 0.0229(3) 0.0223(3) -0.0006(3) 0.0125(3) 0.0015(3)
 C33 0.0147(3) 0.0178(3) 0.0230(3) -0.0022(3) 0.0097(3) 0.0024(2)
 C34 0.0216(4) 0.0150(3) 0.0518(6) -0.0033(4) -0.0075(4) -0.0013(3)

_geom_special_details
;
 All esds (except the esd in the dihedral angle between two l.s. planes)
 are estimated using the full covariance matrix.  The cell esds are taken
 into account individually in the estimation of esds in distances, angles
 and torsion angles; correlations between esds in cell parameters are only
 used when they are defined by crystal symmetry.  An approximate (isotropic)
 treatment of cell esds is used for estimating esds involving l.s. planes.
;
loop_
  _geom_bond_atom_site_label_1
  _geom_bond_atom_site_label_2
  _geom_bond_distance
  _geom_bond_site_symmetry_2
  _geom_bond_publ_flag
 Cl1 B20 1.8992(8) . ?
 Cl2 B20 1.8698(8) . ?
 N1 C4 1.4401(9) . ?
 N1 C5 1.3403(8) . ?
 N1 C19 1.4810(9) . ?
 N2 C5 1.3443(8) . ?
 N2 C6 1.4402(9) . ?
 N2 C18 1.4756(9) . ?
 C1 H1A 0.9800 . ?
 C1 H1B 0.9800 . ?
 C1 H1C 0.9800 . ?
 C1 C2 1.5324(12) . ?
 C2 H2 1.0000 . ?
 C2 C3 1.5199(11) . ?
 C2 C34 1.5273(13) . ?
 C3 C4 1.4047(10) . ?
 C3 C33 1.3937(10) . ?
 C4 C27 1.4009(10) . ?
 C5 B20 1.6661(10) . ?
 C6 C7 1.4100(9) . ?
 C6 C13 1.4049(10) . ?
 C7 C8 1.5186(10) . ?
 C7 C14 1.3930(10) . ?
 C8 H8 1.0000 . ?
 C8 C9 1.5298(11) . ?
 C8 C17 1.5295(12) . ?
 C9 H9A 0.9800 . ?
 C9 H9B 0.9800 . ?
 C9 H9C 0.9800 . ?
 C10 H10A 0.9800 . ?
 C10 H10B 0.9800 . ?
 C10 H10C 0.9800 . ?
 C10 C11 1.5356(12) . ?
 C11 H11 1.0000 . ?
 C11 C12 1.5383(12) . ?
 C11 C13 1.5189(10) . ?
 C12 H12A 0.9800 . ?
 C12 H12B 0.9800 . ?
 C12 H12C 0.9800 . ?
 C13 C16 1.3997(10) . ?
 C14 H14 0.9500 . ?
 C14 C15 1.3873(12) . ?
 C15 H15 0.9500 . ?
 C15 C16 1.3825(12) . ?
 C16 H16 0.9500 . ?
 C17 H17A 0.9800 . ?
 C17 H17B 0.9800 . ?
 C17 H17C 0.9800 . ?
 C18 H18A 0.9900 . ?
 C18 H18B 0.9900 . ?
 C18 C19 1.5160(10) . ?
 C19 H19A 0.9900 . ?
 C19 H19B 0.9900 . ?
 B20 C21 1.6204(10) . ?
 C21 C22 1.4055(10) . ?
 C21 C26 1.4048(10) . ?
 C22 H22 0.9500 . ?
 C22 C23 1.3934(10) . ?
 C23 H23 0.9500 . ?
 C23 C24 1.3919(11) . ?
 C24 H24 0.9500 . ?
 C24 C25 1.3893(11) . ?
 C25 H25 0.9500 . ?
 C25 C26 1.3955(10) . ?
 C26 H26 0.9500 . ?
 C27 C28 1.5171(10) . ?
 C27 C31 1.3966(10) . ?
 C28 H28 1.0000 . ?
 C28 C29 1.5322(12) . ?
 C28 C30 1.5309(13) . ?
 C29 H29A 0.9800 . ?
 C29 H29B 0.9800 . ?
 C29 H29C 0.9800 . ?
 C30 H30A 0.9800 . ?
 C30 H30B 0.9800 . ?
 C30 H30C 0.9800 . ?
 C31 H31 0.9500 . ?
 C31 C32 1.3889(11) . ?
 C32 H32 0.9500 . ?
 C32 C33 1.3870(12) . ?
 C33 H33 0.9500 . ?
 C34 H34A 0.9800 . ?
 C34 H34B 0.9800 . ?
 C34 H34C 0.9800 . ?

loop_
  _geom_angle_atom_site_label_1
  _geom_angle_atom_site_label_2
  _geom_angle_atom_site_label_3
  _geom_angle
  _geom_angle_site_symmetry_1
  _geom_angle_site_symmetry_3
  _geom_angle_publ_flag
 C4 N1 C19 115.29(5) . . ?
 C5 N1 C4 131.31(6) . . ?
 C5 N1 C19 112.25(5) . . ?
 C5 N2 C6 129.92(6) . . ?
 C5 N2 C18 111.97(5) . . ?
 C6 N2 C18 117.82(5) . . ?
 H1A C1 H1B 109.5 . . ?
 H1A C1 H1C 109.5 . . ?
 H1B C1 H1C 109.5 . . ?
 C2 C1 H1A 109.5 . . ?
 C2 C1 H1B 109.5 . . ?
 C2 C1 H1C 109.5 . . ?
 C1 C2 H2 107.8 . . ?
 C3 C2 C1 111.85(6) . . ?
 C3 C2 H2 107.8 . . ?
 C3 C2 C34 111.04(8) . . ?
 C34 C2 C1 110.29(7) . . ?
 C34 C2 H2 107.8 . . ?
 C4 C3 C2 122.87(6) . . ?
 C33 C3 C2 119.60(6) . . ?
 C33 C3 C4 117.53(7) . . ?
 C3 C4 N1 118.45(6) . . ?
 C27 C4 N1 118.71(6) . . ?
 C27 C4 C3 122.40(6) . . ?
 N1 C5 N2 108.63(6) . . ?
 N1 C5 B20 127.41(6) . . ?
 N2 C5 B20 123.20(6) . . ?
 C7 C6 N2 117.87(6) . . ?
 C13 C6 N2 119.59(6) . . ?
 C13 C6 C7 122.23(6) . . ?
 C6 C7 C8 122.25(6) . . ?
 C14 C7 C6 117.62(6) . . ?
 C14 C7 C8 120.12(6) . . ?
 C7 C8 H8 107.3 . . ?
 C7 C8 C9 113.50(6) . . ?
 C7 C8 C17 110.99(7) . . ?
 C9 C8 H8 107.3 . . ?
 C17 C8 H8 107.3 . . ?
 C17 C8 C9 110.23(6) . . ?
 C8 C9 H9A 109.5 . . ?
 C8 C9 H9B 109.5 . . ?
 C8 C9 H9C 109.5 . . ?
 H9A C9 H9B 109.5 . . ?
 H9A C9 H9C 109.5 . . ?
 H9B C9 H9C 109.5 . . ?
 H10A C10 H10B 109.5 . . ?
 H10A C10 H10C 109.5 . . ?
 H10B C10 H10C 109.5 . . ?
 C11 C10 H10A 109.5 . . ?
 C11 C10 H10B 109.5 . . ?
 C11 C10 H10C 109.5 . . ?
 C10 C11 H11 108.4 . . ?
 C10 C11 C12 109.87(7) . . ?
 C12 C11 H11 108.4 . . ?
 C13 C11 C10 112.18(7) . . ?
 C13 C11 H11 108.4 . . ?
 C13 C11 C12 109.47(6) . . ?
 C11 C12 H12A 109.5 . . ?
 C11 C12 H12B 109.5 . . ?
 C11 C12 H12C 109.5 . . ?
 H12A C12 H12B 109.5 . . ?
 H12A C12 H12C 109.5 . . ?
 H12B C12 H12C 109.5 . . ?
 C6 C13 C11 123.98(6) . . ?
 C16 C13 C6 117.53(7) . . ?
 C16 C13 C11 118.45(6) . . ?
 C7 C14 H14 119.4 . . ?
 C15 C14 C7 121.19(7) . . ?
 C15 C14 H14 119.4 . . ?
 C14 C15 H15 119.9 . . ?
 C16 C15 C14 120.21(7) . . ?
 C16 C15 H15 119.9 . . ?
 C13 C16 H16 119.4 . . ?
 C15 C16 C13 121.18(7) . . ?
 C15 C16 H16 119.4 . . ?
 C8 C17 H17A 109.5 . . ?
 C8 C17 H17B 109.5 . . ?
 C8 C17 H17C 109.5 . . ?
 H17A C17 H17B 109.5 . . ?
 H17A C17 H17C 109.5 . . ?
 H17B C17 H17C 109.5 . . ?
 N2 C18 H18A 111.3 . . ?
 N2 C18 H18B 111.3 . . ?
 N2 C18 C19 102.55(5) . . ?
 H18A C18 H18B 109.2 . . ?
 C19 C18 H18A 111.3 . . ?
 C19 C18 H18B 111.3 . . ?
 N1 C19 C18 102.19(5) . . ?
 N1 C19 H19A 111.3 . . ?
 N1 C19 H19B 111.3 . . ?
 C18 C19 H19A 111.3 . . ?
 C18 C19 H19B 111.3 . . ?
 H19A C19 H19B 109.2 . . ?
 Cl2 B20 Cl1 106.42(4) . . ?
 C5 B20 Cl1 100.88(4) . . ?
 C5 B20 Cl2 110.99(5) . . ?
 C21 B20 Cl1 110.17(5) . . ?
 C21 B20 Cl2 109.01(5) . . ?
 C21 B20 C5 118.53(5) . . ?
 C22 C21 B20 122.27(6) . . ?
 C26 C21 B20 121.42(6) . . ?
 C26 C21 C22 116.17(6) . . ?
 C21 C22 H22 119.0 . . ?
 C23 C22 C21 122.03(7) . . ?
 C23 C22 H22 119.0 . . ?
 C22 C23 H23 119.7 . . ?
 C24 C23 C22 120.51(7) . . ?
 C24 C23 H23 119.7 . . ?
 C23 C24 H24 120.6 . . ?
 C25 C24 C23 118.76(7) . . ?
 C25 C24 H24 120.6 . . ?
 C24 C25 H25 119.8 . . ?
 C24 C25 C26 120.39(7) . . ?
 C26 C25 H25 119.8 . . ?
 C21 C26 H26 118.9 . . ?
 C25 C26 C21 122.12(7) . . ?
 C25 C26 H26 118.9 . . ?
 C4 C27 C28 122.70(6) . . ?
 C31 C27 C4 117.68(6) . . ?
 C31 C27 C28 119.58(6) . . ?
 C27 C28 H28 107.9 . . ?
 C27 C28 C29 109.77(7) . . ?
 C27 C28 C30 112.18(7) . . ?
 C29 C28 H28 107.9 . . ?
 C30 C28 H28 107.9 . . ?
 C30 C28 C29 110.91(8) . . ?
 C28 C29 H29A 109.5 . . ?
 C28 C29 H29B 109.5 . . ?
 C28 C29 H29C 109.5 . . ?
 H29A C29 H29B 109.5 . . ?
 H29A C29 H29C 109.5 . . ?
 H29B C29 H29C 109.5 . . ?
 C28 C30 H30A 109.5 . . ?
 C28 C30 H30B 109.5 . . ?
 C28 C30 H30C 109.5 . . ?
 H30A C30 H30B 109.5 . . ?
 H30A C30 H30C 109.5 . . ?
 H30B C30 H30C 109.5 . . ?
 C27 C31 H31 119.5 . . ?
 C32 C31 C27 120.96(7) . . ?
 C32 C31 H31 119.5 . . ?
 C31 C32 H32 120.0 . . ?
 C33 C32 C31 120.02(7) . . ?
 C33 C32 H32 120.0 . . ?
 C3 C33 H33 119.4 . . ?
 C32 C33 C3 121.23(7) . . ?
 C32 C33 H33 119.4 . . ?
 C2 C34 H34A 109.5 . . ?
 C2 C34 H34B 109.5 . . ?
 C2 C34 H34C 109.5 . . ?
 H34A C34 H34B 109.5 . . ?
 H34A C34 H34C 109.5 . . ?
 H34B C34 H34C 109.5 . . ?

loop_
  _geom_torsion_atom_site_label_1
  _geom_torsion_atom_site_label_2
  _geom_torsion_atom_site_label_3
  _geom_torsion_atom_site_label_4
  _geom_torsion
  _geom_torsion_site_symmetry_1
  _geom_torsion_site_symmetry_2
  _geom_torsion_site_symmetry_3
  _geom_torsion_site_symmetry_4
  _geom_torsion_publ_flag
 Cl1 B20 C21 C22 -33.64(8) . . . . ?
 Cl1 B20 C21 C26 141.89(6) . . . . ?
 Cl2 B20 C21 C22 -150.07(5) . . . . ?
 Cl2 B20 C21 C26 25.46(8) . . . . ?
 N1 C4 C27 C28 -0.41(10) . . . . ?
 N1 C4 C27 C31 177.33(6) . . . . ?
 N1 C5 B20 Cl1 -101.23(7) . . . . ?
 N1 C5 B20 Cl2 11.23(8) . . . . ?
 N1 C5 B20 C21 138.50(7) . . . . ?
 N2 C5 B20 Cl1 67.60(7) . . . . ?
 N2 C5 B20 Cl2 -179.94(5) . . . . ?
 N2 C5 B20 C21 -52.67(9) . . . . ?
 N2 C6 C7 C8 -4.43(9) . . . . ?
 N2 C6 C7 C14 174.58(6) . . . . ?
 N2 C6 C13 C11 2.00(10) . . . . ?
 N2 C6 C13 C16 -175.54(6) . . . . ?
 N2 C18 C19 N1 14.62(7) . . . . ?
 C1 C2 C3 C4 -122.04(8) . . . . ?
 C1 C2 C3 C33 57.85(10) . . . . ?
 C2 C3 C4 N1 3.18(10) . . . . ?
 C2 C3 C4 C27 175.48(7) . . . . ?
 C2 C3 C33 C32 -178.97(8) . . . . ?
 C3 C4 C27 C28 -172.69(7) . . . . ?
 C3 C4 C27 C31 5.05(11) . . . . ?
 C4 N1 C5 N2 170.44(6) . . . . ?
 C4 N1 C5 B20 -19.41(11) . . . . ?
 C4 N1 C19 C18 178.85(6) . . . . ?
 C4 C3 C33 C32 0.92(12) . . . . ?
 C4 C27 C28 C29 116.85(8) . . . . ?
 C4 C27 C28 C30 -119.36(8) . . . . ?
 C4 C27 C31 C32 -2.23(12) . . . . ?
 C5 N1 C4 C3 -81.60(9) . . . . ?
 C5 N1 C4 C27 105.81(8) . . . . ?
 C5 N1 C19 C18 -11.97(8) . . . . ?
 C5 N2 C6 C7 75.00(9) . . . . ?
 C5 N2 C6 C13 -111.35(8) . . . . ?
 C5 N2 C18 C19 -14.22(8) . . . . ?
 C5 B20 C21 C22 81.73(8) . . . . ?
 C5 B20 C21 C26 -102.74(7) . . . . ?
 C6 N2 C5 N1 -166.31(6) . . . . ?
 C6 N2 C5 B20 23.04(10) . . . . ?
 C6 N2 C18 C19 160.15(6) . . . . ?
 C6 C7 C8 C9 -147.16(7) . . . . ?
 C6 C7 C8 C17 88.04(8) . . . . ?
 C6 C7 C14 C15 0.32(11) . . . . ?
 C6 C13 C16 C15 1.86(11) . . . . ?
 C7 C6 C13 C11 175.37(6) . . . . ?
 C7 C6 C13 C16 -2.17(10) . . . . ?
 C7 C14 C15 C16 -0.61(12) . . . . ?
 C8 C7 C14 C15 179.36(7) . . . . ?
 C10 C11 C13 C6 128.41(8) . . . . ?
 C10 C11 C13 C16 -54.07(9) . . . . ?
 C11 C13 C16 C15 -175.82(7) . . . . ?
 C12 C11 C13 C6 -109.35(8) . . . . ?
 C12 C11 C13 C16 68.17(9) . . . . ?
 C13 C6 C7 C8 -177.91(6) . . . . ?
 C13 C6 C7 C14 1.10(10) . . . . ?
 C14 C7 C8 C9 33.86(9) . . . . ?
 C14 C7 C8 C17 -90.95(9) . . . . ?
 C14 C15 C16 C13 -0.53(12) . . . . ?
 C18 N2 C5 N1 7.19(8) . . . . ?
 C18 N2 C5 B20 -163.46(6) . . . . ?
 C18 N2 C6 C7 -98.19(7) . . . . ?
 C18 N2 C6 C13 75.47(8) . . . . ?
 C19 N1 C4 C3 85.03(8) . . . . ?
 C19 N1 C4 C27 -87.56(8) . . . . ?
 C19 N1 C5 N2 3.50(8) . . . . ?
 C19 N1 C5 B20 173.65(6) . . . . ?
 B20 C21 C22 C23 176.85(6) . . . . ?
 B20 C21 C26 C25 -175.72(7) . . . . ?
 C21 C22 C23 C24 -1.59(11) . . . . ?
 C22 C21 C26 C25 0.07(10) . . . . ?
 C22 C23 C24 C25 0.85(11) . . . . ?
 C23 C24 C25 C26 0.30(12) . . . . ?
 C24 C25 C26 C21 -0.77(12) . . . . ?
 C26 C21 C22 C23 1.10(10) . . . . ?
 C27 C31 C32 C33 -1.06(13) . . . . ?
 C28 C27 C31 C32 175.58(8) . . . . ?
 C31 C27 C28 C29 -60.85(10) . . . . ?
 C31 C27 C28 C30 62.94(10) . . . . ?
 C31 C32 C33 C3 1.74(13) . . . . ?
 C33 C3 C4 N1 -176.71(6) . . . . ?
 C33 C3 C4 C27 -4.41(11) . . . . ?
 C34 C2 C3 C4 114.29(8) . . . . ?
 C34 C2 C3 C33 -65.82(10) . . . . ?

_shelx_res_file
;
TITL mo_GAR_79_0m_a.res in P2(1)/n
    mo_gar_79_0m_a.res
    created by SHELXL-2016/6 at 12:35:45 on 10-Apr-2021
CELL 0.71073 11.8231 18.7331 14.2604 90 106.906 90
ZERR 4 0.0007 0.0011 0.0008 0 0.002 0
LATT 1
SYMM 0.5-X,0.5+Y,0.5-Z
SFAC C H B Cl N
UNIT 132 172 4 8 8

L.S. 4
PLAN  -5 0 0
SIZE 0.08 0.12 0.12
TEMP -173.15
HTAB
BOND $H
CONF
fmap 2
acta
REM <olex2.extras>
REM <HklSrc "%.\\mo_GAR_79_0m_a.hkl">
REM </olex2.extras>

WGHT    0.053700    0.723200
FVAR       0.64093
CL1   4    0.223045    0.823756    0.160572    11.00000    0.01675    0.01327 =
         0.01322    0.00260    0.00146    0.00352
CL2   4    0.399208    0.734711    0.095375    11.00000    0.01393    0.02181 =
         0.00984   -0.00118    0.00531   -0.00323
N1    5    0.510864    0.770827    0.325592    11.00000    0.00746    0.01351 =
         0.00924   -0.00124    0.00244   -0.00133
N2    5    0.355551    0.755317    0.376391    11.00000    0.00819    0.01313 =
         0.00809   -0.00121    0.00259   -0.00192
C1    1    0.735209    0.605020    0.401752    11.00000    0.02197    0.02173 =
         0.02518    0.00535    0.00613    0.00087
AFIX 137
H1A   2    0.796482    0.590420    0.371890    11.00000   -1.50000
H1B   2    0.710791    0.563727    0.433350    11.00000   -1.50000
H1C   2    0.766666    0.642151    0.450819    11.00000   -1.50000
AFIX   0
C2    1    0.628389    0.634357    0.322314    11.00000    0.01272    0.01236 =
         0.03157    0.00136    0.00841    0.00028
AFIX  13
H2    2    0.565991    0.646819    0.354168    11.00000   -1.20000
AFIX   0
C3    1    0.658964    0.701774    0.275572    11.00000    0.01051    0.01260 =
         0.01726   -0.00181    0.00486   -0.00001
C4    1    0.600054    0.766935    0.275216    11.00000    0.00779    0.01263 =
         0.01172   -0.00143    0.00384   -0.00088
C5    1    0.396924    0.751206    0.298158    11.00000    0.00823    0.00877 =
         0.00855    0.00021    0.00238   -0.00006
C6    1    0.248224    0.727205    0.390362    11.00000    0.00814    0.01339 =
         0.00853    0.00029    0.00272   -0.00123
C7    1    0.242556    0.653194    0.406421    11.00000    0.01071    0.01341 =
         0.00962    0.00088    0.00216   -0.00194
C8    1    0.341303    0.602608    0.402147    11.00000    0.01278    0.01318 =
         0.01804    0.00293    0.00280    0.00036
AFIX  13
H8    2    0.381113    0.623627    0.355551    11.00000   -1.20000
AFIX   0
C9    1    0.297628    0.528256    0.363897    11.00000    0.02142    0.01465 =
         0.01732    0.00065    0.00262    0.00071
AFIX 137
H9A   2    0.268212    0.503359    0.412559    11.00000   -1.50000
H9B   2    0.362992    0.501045    0.352153    11.00000   -1.50000
H9C   2    0.233703    0.532735    0.302478    11.00000   -1.50000
AFIX   0
C10   1    0.055018    0.885415    0.312927    11.00000    0.02056    0.02977 =
         0.02822    0.01029    0.00853    0.01139
AFIX 137
H10A  2    0.042198    0.860490    0.250277    11.00000   -1.50000
H10B  2    0.066674    0.936442    0.303739    11.00000   -1.50000
H10C  2   -0.014063    0.878817    0.336825    11.00000   -1.50000
AFIX   0
C11   1    0.165093    0.854852    0.388046    11.00000    0.01505    0.01579 =
         0.01691    0.00166    0.00747    0.00346
AFIX  13
H11   2    0.235887    0.866657    0.366086    11.00000   -1.20000
AFIX   0
C12   1    0.180538    0.889590    0.488741    11.00000    0.02816    0.01879 =
         0.02425   -0.00507    0.01447   -0.00122
AFIX 137
H12A  2    0.116285    0.874208    0.514680    11.00000   -1.50000
H12B  2    0.178620    0.941656    0.481767    11.00000   -1.50000
H12C  2    0.256551    0.875037    0.533928    11.00000   -1.50000
AFIX   0
C13   1    0.158576    0.774294    0.397427    11.00000    0.01013    0.01590 =
         0.01108   -0.00021    0.00416    0.00041
C14   1    0.142763    0.627187    0.428281    11.00000    0.01509    0.01713 =
         0.01543    0.00009    0.00575   -0.00530
AFIX  43
H14   2    0.136804    0.577570    0.439778    11.00000   -1.20000
AFIX   0
C15   1    0.051924    0.672434    0.433567    11.00000    0.01384    0.02361 =
         0.02019   -0.00208    0.00865   -0.00579
AFIX  43
H15   2   -0.015746    0.653572    0.447954    11.00000   -1.20000
AFIX   0
C16   1    0.059560    0.744884    0.417966    11.00000    0.01132    0.02211 =
         0.01829   -0.00135    0.00747   -0.00106
AFIX  43
H16   2   -0.003529    0.775254    0.421244    11.00000   -1.20000
AFIX   0
C17   1    0.434264    0.596960    0.502088    11.00000    0.02242    0.02111 =
         0.03027   -0.00058   -0.01067    0.00340
AFIX 137
H17A  2    0.465606    0.644547    0.523670    11.00000   -1.50000
H17B  2    0.498765    0.565866    0.496754    11.00000   -1.50000
H17C  2    0.397982    0.576848    0.549877    11.00000   -1.50000
AFIX   0
C18   1    0.442180    0.788064    0.461577    11.00000    0.01124    0.01839 =
         0.00961   -0.00410    0.00285   -0.00364
AFIX  23
H18A  2    0.449956    0.760044    0.521990    11.00000   -1.20000
H18B  2    0.419798    0.837709    0.472030    11.00000   -1.20000
AFIX   0
C19   1    0.555327    0.785959    0.431950    11.00000    0.00943    0.02005 =
         0.00925   -0.00264    0.00129   -0.00286
AFIX  23
H19A  2    0.597374    0.832269    0.444564    11.00000   -1.20000
H19B  2    0.608834    0.747710    0.467062    11.00000   -1.20000
AFIX   0
B20   3    0.310441    0.737221    0.184534    11.00000    0.01024    0.01273 =
         0.00852    0.00009    0.00211   -0.00032
C21   1    0.221356    0.669496    0.164590    11.00000    0.00887    0.01303 =
         0.00834   -0.00013    0.00078   -0.00022
C22   1    0.111273    0.671736    0.183649    11.00000    0.01005    0.01622 =
         0.01004   -0.00122    0.00144   -0.00079
AFIX  43
H22   2    0.089860    0.713524    0.212190    11.00000   -1.20000
AFIX   0
C23   1    0.032577    0.614552    0.161970    11.00000    0.01074    0.01975 =
         0.01356   -0.00011    0.00189   -0.00297
AFIX  43
H23   2   -0.040239    0.617461    0.177382    11.00000   -1.20000
AFIX   0
C24   1    0.059834    0.553201    0.117908    11.00000    0.01588    0.01664 =
         0.01645   -0.00089    0.00122   -0.00472
AFIX  43
H24   2    0.005821    0.514420    0.102274    11.00000   -1.20000
AFIX   0
C25   1    0.167499    0.549733    0.097217    11.00000    0.01791    0.01396 =
         0.01864   -0.00363    0.00306   -0.00137
AFIX  43
H25   2    0.187277    0.508325    0.066873    11.00000   -1.20000
AFIX   0
C26   1    0.246766    0.606716    0.120743    11.00000    0.01198    0.01438 =
         0.01449   -0.00245    0.00276    0.00025
AFIX  43
H26   2    0.320284    0.602931    0.106653    11.00000   -1.20000
AFIX   0
C27   1    0.634240    0.829916    0.237967    11.00000    0.01096    0.01336 =
         0.01411   -0.00019    0.00527   -0.00076
C28   1    0.580590    0.902061    0.247927    11.00000    0.01641    0.01272 =
         0.02273    0.00137    0.01013    0.00045
AFIX  13
H28   2    0.519927    0.894852    0.283422    11.00000   -1.20000
AFIX   0
C29   1    0.676169    0.951893    0.309828    11.00000    0.02639    0.01869 =
         0.04106   -0.01027    0.01557   -0.00682
AFIX 137
H29A  2    0.709494    0.931284    0.375230    11.00000   -1.50000
H29B  2    0.641227    0.998519    0.315641    11.00000   -1.50000
H29C  2    0.738922    0.957748    0.278208    11.00000   -1.50000
AFIX   0
C30   1    0.519016    0.935602    0.148245    11.00000    0.03247    0.02481 =
         0.03123    0.01086    0.01123    0.01080
AFIX 137
H30A  2    0.576364    0.941988    0.111251    11.00000   -1.50000
H30B  2    0.486167    0.982089    0.158057    11.00000   -1.50000
H30C  2    0.455099    0.904199    0.111616    11.00000   -1.50000
AFIX   0
C31   1    0.724406    0.825306    0.193083    11.00000    0.01506    0.01890 =
         0.01881    0.00150    0.00989   -0.00076
AFIX  43
H31   2    0.747483    0.866837    0.165086    11.00000   -1.20000
AFIX   0
C32   1    0.780828    0.760879    0.188784    11.00000    0.01666    0.02290 =
         0.02225   -0.00055    0.01250    0.00147
AFIX  43
H32   2    0.841095    0.758408    0.157033    11.00000   -1.20000
AFIX   0
C33   1    0.749213    0.700148    0.230830    11.00000    0.01470    0.01776 =
         0.02304   -0.00216    0.00974    0.00238
AFIX  43
H33   2    0.789829    0.656637    0.229098    11.00000   -1.20000
AFIX   0
C34   1    0.577943    0.577210    0.245083    11.00000    0.02160    0.01495 =
         0.05180   -0.00330   -0.00746   -0.00134
AFIX 137
H34A  2    0.507452    0.595850    0.196522    11.00000   -1.50000
H34B  2    0.556609    0.534936    0.276713    11.00000   -1.50000
H34C  2    0.637400    0.564178    0.212460    11.00000   -1.50000
AFIX   0
HKLF 4


REM  mo_GAR_79_0m_a.res in P2(1)/n
REM R1 =  0.0349 for   13012 Fo > 4sig(Fo)  and  0.0424 for all   14650 data
REM    351 parameters refined using      0 restraints

END

WGHT      0.0537      0.7232

REM No hydrogen bonds found for HTAB generation

REM Highest difference peak  0.607,  deepest hole -0.525,  1-sigma level  0.161
Q1    1   0.0443  0.5825  0.1377  11.00000  0.05    0.61
Q2    1   0.4072  0.5873  0.5335  11.00000  0.05    0.59
Q3    1   0.2029  0.5798  0.1048  11.00000  0.05    0.57
Q4    1   0.1050  0.5511  0.1014  11.00000  0.05    0.54
Q5    1   0.6809  0.8291  0.2175  11.00000  0.05    0.53
;
_shelx_res_checksum                12120
_shelx_hkl_file
;
  -3   0   0    0.00    0.60
  -3   0   0   -0.40    0.70
  -3   0   0   -0.40    0.60
   3   0   0    0.70    0.80
   3   0   0   -0.20    0.60
   3   0   0    0.80    0.70
   3   0   0   -0.10    0.50
   4   0   0  149.79    9.40
   4   0   0  137.09    8.50
  -4   0   0  157.58    8.70
   4   0   0  136.09    8.90
   4   0   0  139.79    8.80
   4   0   0  140.39    9.00
  -4   0   0  155.08    8.80
  -4   0   0  149.09    9.10
   5   0   0    2.60    1.10
  -5   0   0    2.90    0.90
  -5   0   0    2.30    1.20
  -5   0   0    3.20    1.00
   5   0   0    4.80    1.30
   5   0   0    2.40    1.00
   5   0   0    1.90    0.70
   5   0   0    2.80    1.20
  -6   0   0 2927.31  160.68
  -6   0   0 3008.40  160.58
  -6   0   0 2854.21  161.28
   6   0   0 2729.23  161.18
   6   0   0 2741.13  161.08
   6   0   0 3057.19  161.28
   6   0   0 2784.92  160.48
   6   0   0 2840.12  161.78
   7   0   0    6.50    1.70
   7   0   0    6.40    1.60
  -7   0   0    2.50    1.10
   7   0   0    4.30    1.10
   7   0   0    4.20    1.60
   7   0   0    3.70    1.20
  -7   0   0    3.80    1.50
  -7   0   0    5.00    1.10
  -8   0   0  142.99    8.60
  -8   0   0  135.79    9.70
   8   0   0  122.79    9.40
   8   0   0  153.78    8.70
  -8   0   0  139.49    8.90
   8   0   0  144.39    9.30
   8   0   0  143.39    9.60
   8   0   0  125.89   10.20
   9   0   0    0.60    1.00
   9   0   0   -0.70    1.30
   9   0   0   -0.60    1.40
   9   0   0    1.10    1.10
   9   0   0    2.20    1.70
  10   0   0  391.86   23.70
 -10   0   0  364.06   23.20
 -10   0   0  386.06   24.50
  10   0   0  389.46   25.40
  10   0   0  391.86   24.20
  10   0   0  376.66   24.10
  10   0   0  439.06   23.10
  11   0   0    3.20    2.10
  11   0   0   -2.00    1.50
  11   0   0    0.70    1.80
  11   0   0    0.20    1.30
  11   0   0    0.20    1.10
  12   0   0  124.49   11.70
  12   0   0  154.98   11.00
  12   0   0  149.59    9.30
  12   0   0  141.89   10.90
  13   0   0    1.30    2.00
  13   0   0    2.10    1.90
  13   0   0    0.20    2.00
  14   0   0   11.50    3.30
  14   0   0    5.30    3.00
  15   0   0    5.70    3.00
  15   0   0    1.10    2.00
  16   0   0   53.89    6.60
  16   0   0   75.89    7.50
  17   0   0    3.30    2.80
  17   0   0    2.70    3.10
  17   0   0    3.80    5.10
  18   0   0  287.47   20.20
  18   0   0  299.37   20.50
  18   0   0  259.97   23.30
   3  -1   0 1114.79   68.89
  -3  -1   0 1301.97   68.59
  -3  -1   0 1295.27   68.79
   3  -1   0 1220.68   69.09
   3  -1   0 1277.17   69.29
   3  -1   0 1161.78   68.99
  -3  -1   0 1319.17   68.99
   3  -1   0 1163.78   68.69
  -3   1   0 1280.97   68.89
   3   1   0 1096.89   68.89
   3   1   0 1140.59   68.49
   3   1   0 1196.48   68.89
  -3   1   0 1306.47   69.19
   3   1   0 1133.29   68.49
   3   1   0 1205.28   68.99
  -3   1   0 1307.07   68.89
  -3   1   0 1328.77   68.79
   4  -1   0  257.57   16.70
  -4  -1   0  303.47   16.70
   4  -1   0  274.67   16.30
  -4  -1   0  296.97   16.40
  -4  -1   0  309.57   16.20
   4  -1   0  269.97   16.30
   4  -1   0  313.27   17.20
   4  -1   0  271.17   16.60
   4   1   0  274.97   16.00
   4   1   0  257.87   16.00
   4   1   0  282.07   16.60
  -4   1   0  289.37   16.40
  -4   1   0  282.97   16.80
   4   1   0  263.17   16.80
  -4   1   0  312.57   16.50
   4   1   0  271.37   16.60
   5  -1   0    0.20    0.90
  -5  -1   0    1.70    1.20
   5  -1   0    0.00    0.80
   5  -1   0   -0.30    1.10
  -5  -1   0    0.20    0.80
   5  -1   0    1.20    0.80
   5  -1   0    0.00    1.10
  -5  -1   0    2.40    0.80
   5   1   0    2.50    1.10
  -5   1   0    0.80    1.10
  -5   1   0    0.90    0.90
   5   1   0    1.40    1.00
  -5   1   0    0.60    1.00
   5   1   0    1.60    0.90
   5   1   0    0.30    0.50
   6  -1   0 2027.40  124.19
   6  -1   0 2291.17  123.79
  -6  -1   0 2315.67  123.59
   6  -1   0 2109.89  124.19
   6  -1   0 2287.67  124.99
  -6  -1   0 2281.87  123.59
  -6  -1   0 2247.88  124.29
   6  -1   0 2075.09  123.59
   6   1   0 2299.67  123.49
  -6   1   0 2190.78  124.49
   6   1   0 1995.20  123.99
  -6   1   0 2285.97  123.69
  -6   1   0 2236.78  123.89
   6   1   0 2132.09  124.09
   6   1   0 2203.38  123.99
   6   1   0 2292.17  124.99
   7  -1   0  150.08    9.70
  -7  -1   0  142.69    8.70
  -7  -1   0  146.49    8.80
   7  -1   0  145.79   10.30
  -7  -1   0  143.19    8.70
  -7  -1   0  141.39    9.60
   7  -1   0  147.29    8.90
   7  -1   0  145.59    9.80
   7  -1   0  129.39    9.60
   7  -1   0  136.19    9.10
  -7   1   0  130.29    9.70
   7   1   0  154.08    8.70
  -7   1   0  145.39    9.20
  -7   1   0  143.99    8.80
   7   1   0  149.59    9.50
   7   1   0  143.39    9.30
   7   1   0  130.69    9.40
   8  -1   0  143.69    8.90
   8  -1   0  131.79    9.60
   8  -1   0  144.89    9.50
  -8  -1   0  132.79    9.40
   8  -1   0  119.09    9.30
  -8  -1   0  131.49    8.30
   8  -1   0  149.09    8.70
  -8  -1   0  131.89    8.20
  -8  -1   0  131.29    8.50
   8  -1   0  142.09   10.30
   8   1   0  140.59    9.10
   8   1   0  133.39    9.30
   8   1   0  141.89   10.30
  -8   1   0  124.39    9.50
   8   1   0  143.59    8.40
  -8   1   0  128.29    8.80
  -8   1   0  134.99    8.40
   8   1   0  135.69    9.30
   9  -1   0   19.10    3.50
   9  -1   0   27.40    4.30
   9  -1   0   19.90    2.60
   9  -1   0   20.30    3.40
   9  -1   0   18.40    3.10
   9  -1   0   22.30    2.70
  -9  -1   0   20.10    3.20
   9   1   0   23.70    3.40
  -9   1   0   20.10    2.00
   9   1   0   20.20    3.30
  -9   1   0   25.60    2.90
  -9   1   0   23.10    3.80
   9   1   0   18.40    3.40
   9   1   0   22.80    3.20
   9   1   0   23.80    2.30
  10  -1   0  452.45   26.80
  10  -1   0  430.86   27.50
  10  -1   0  418.16   27.30
 -10  -1   0  440.16   27.60
  10  -1   0  440.86   28.50
  10  -1   0  481.25   26.40
 -10   1   0  446.06   26.70
  10   1   0  422.96   27.20
  10   1   0  489.55   26.10
  10   1   0  444.36   28.60
  10   1   0  447.56   27.00
  10   1   0  466.85   27.30
  11  -1   0    2.40    1.50
  11  -1   0   -1.30    1.80
  11  -1   0   -0.70    1.70
  11  -1   0    0.30    1.10
  11  -1   0   -1.60    1.00
  11   1   0    3.30    2.20
 -11   1   0    2.40    1.40
  11   1   0   -0.70    1.80
  11   1   0    1.60    1.60
  12  -1   0 1115.29   68.49
  12  -1   0 1106.09   66.19
  12  -1   0 1189.88   67.09
  12  -1   0 1111.29   66.99
  12  -1   0 1200.88   65.59
  12   1   0 1272.77   67.09
  12   1   0 1085.19   66.29
  12   1   0 1154.18   68.69
  12   1   0 1108.89   66.89
  13  -1   0   28.20    3.20
  13  -1   0   27.00    4.50
  13  -1   0   23.20    4.40
  13  -1   0   24.30    3.60
  13   1   0   25.70    4.30
  13   1   0   35.80    6.50
  14  -1   0  107.89    9.10
  14  -1   0  112.69    9.10
  14  -1   0   80.29    7.70
  14   1   0   97.59    8.80
  14   1   0   84.49    8.00
  15  -1   0    0.50    2.50
  15  -1   0    0.40    2.50
  15   1   0    1.20    2.40
  15   1   0    0.90    1.40
  16  -1   0   44.50    6.60
  16   1   0   48.40    8.90
  16   1   0   43.60    6.00
  16   1   0   38.60    5.90
  17  -1   0    8.50    3.50
  17  -1   0    1.30    2.40
  17   1   0    9.80    3.10
  17   1   0    4.70    5.30
  17   1   0    1.20    2.30
  18  -1   0  160.18   13.50
  18  -1   0  139.39   16.20
  18  -1   0  160.08   13.20
  18   1   0  161.68   12.80
  18   1   0  162.18   13.10
  18   1   0  150.88   16.30
   0   2   0    0.00    0.20
  -1  -2   0  921.01   47.90
  -1  -2   0  830.02   47.80
  -1  -2   0  862.71   48.10
  -1  -2   0  894.91   48.20
  -1  -2   0  860.81   48.10
   1  -2   0  886.21   48.10
   1  -2   0  828.02   48.10
   1  -2   0  817.62   48.10
   1  -2   0  845.72   48.10
   1  -2   0  742.53   47.90
  -1  -2   0  913.21   48.10
  -1   2   0  886.21   48.10
   1   2   0  780.22   48.00
  -1   2   0  750.52   48.10
   1   2   0  843.82   48.10
  -1   2   0  915.41   48.10
   1   2   0  846.22   48.20
  -1   2   0  849.22   48.10
  -1   2   0  928.21   48.20
  -1   2   0  898.51   48.00
  -1   2   0  879.41   48.20
   2  -2   0  448.26   25.30
   2  -2   0  432.76   25.50
   2  -2   0  426.66   25.40
   2  -2   0  420.56   25.10
  -2  -2   0  449.06   25.20
  -2  -2   0  453.35   25.20
  -2  -2   0  485.65   25.10
   2  -2   0  473.75   25.50
  -2  -2   0  464.35   25.20
   2  -2   0  413.36   25.00
   2   2   0  423.26   25.10
  -2   2   0  455.35   25.50
  -2   2   0  395.76   25.40
  -2   2   0  477.55   25.00
   2   2   0  401.16   25.00
  -2   2   0  406.06   25.40
  -2   2   0  471.75   25.00
  -2   2   0  479.85   25.40
   2   2   0  433.36   25.20
   2   2   0  441.66   25.30
  -2   2   0  484.25   25.30
  -3  -2   0 1959.30  107.09
   3  -2   0 2046.60  107.69
   3  -2   0 1892.21  107.69
   3  -2   0 1764.62  107.09
   3  -2   0 1798.32  107.49
   3  -2   0 1900.21  107.39
   3  -2   0 1818.52  106.99
  -3  -2   0 2019.40  107.19
   3   2   0 1804.92  106.99
  -3   2   0 2026.10  107.29
  -3   2   0 1969.30  107.29
  -3   2   0 2121.89  107.59
  -3   2   0 2057.79  106.99
  -3   2   0 1967.10  106.79
   3   2   0 1761.62  107.19
  -3   2   0 1698.23  107.49
  -4  -2   0  340.17   17.80
   4  -2   0  279.47   17.60
   4  -2   0  297.57   18.10
  -4  -2   0  332.67   18.00
   4  -2   0  275.07   18.20
   4  -2   0  298.27   17.80
   4  -2   0  320.57   18.50
   4  -2   0  308.27   18.20
  -4  -2   0  300.47   17.70
  -4   2   0  323.17   17.70
   4   2   0  288.17   17.90
   4   2   0  311.87   18.10
   4   2   0  285.77   17.50
   4   2   0  302.57   17.90
  -4   2   0  342.07   18.90
  -4   2   0  324.97   17.90
  -4   2   0  310.57   17.90
   5  -2   0  133.39    8.50
   5  -2   0  120.89    7.90
  -5  -2   0  130.19    8.20
  -5  -2   0  137.59    7.90
   5  -2   0  121.19    8.30
   5  -2   0  138.29    8.90
   5  -2   0  124.79    7.80
  -5  -2   0  119.19    7.80
  -5   2   0  135.39    8.00
   5   2   0  119.89    8.10
  -5   2   0  135.09    8.20
  -5   2   0  131.49    8.60
   5   2   0  128.09    7.60
   5   2   0  121.59    8.00
   5   2   0  123.89    8.30
   6  -2   0 2243.08  122.19
   6  -2   0 2169.38  121.59
   6  -2   0 2196.58  121.09
   6  -2   0 1979.00  121.59
   6  -2   0 2139.49  121.69
  -6  -2   0 2215.08  121.49
  -6  -2   0 2250.77  120.89
  -6  -2   0 2203.98  120.89
   6  -2   0 2201.88  120.99
  -6   2   0 2134.69  121.89
   6   2   0 2058.39  121.29
   6   2   0 1944.01  121.29
   6   2   0 2223.28  120.59
  -6   2   0 2224.08  121.09
   6   2   0 2149.19  121.39
  -7  -2   0   13.30    1.60
   7  -2   0   13.80    2.60
  -7  -2   0   13.70    2.30
   7  -2   0    7.60    2.10
   7  -2   0   11.10    2.30
  -7  -2   0   12.90    1.70
   7  -2   0   13.20    2.50
   7  -2   0   11.80    1.90
   7  -2   0   12.30    1.90
  -7   2   0   10.30    2.00
   7   2   0   10.30    2.10
   7   2   0   10.90    1.90
  -7   2   0   16.00    2.00
  -7   2   0   10.50    2.20
   7   2   0   15.30    2.40
   8  -2   0 1109.19   59.39
  -8  -2   0 1011.90   59.09
  -8  -2   0 1005.30   57.89
   8  -2   0 1026.00   59.39
   8  -2   0 1103.39   58.49
   8  -2   0 1030.80   58.49
   8  -2   0 1051.29   59.99
   8  -2   0  915.01   59.09
   8   2   0 1040.70   58.89
   8   2   0 1027.80   60.09
  -8   2   0 1012.60   58.69
   8   2   0 1041.30   58.99
  -8   2   0  970.50   59.39
  -8   2   0 1013.20   58.19
   8   2   0 1049.59   58.89
   9  -2   0   75.59    5.60
   9  -2   0   85.79    7.40
  -9  -2   0   75.39    6.30
   9  -2   0   78.99    5.80
   9  -2   0   80.79    6.60
   9  -2   0   67.49    6.30
  -9   2   0   74.99    5.20
   9   2   0   79.89    6.20
   9   2   0   88.39    7.40
   9   2   0   78.89    6.10
  -9   2   0   78.29    6.00
  -9   2   0   75.49    6.60
   9   2   0   68.89    6.10
 -10  -2   0   22.00    3.70
  10  -2   0   26.90    3.20
  10  -2   0   32.00    3.30
  10  -2   0   27.10    4.50
  10  -2   0   21.20    4.00
  10  -2   0   30.20    4.30
  10   2   0   28.70    4.50
 -10   2   0   25.20    3.50
  10   2   0   29.50    3.80
  10   2   0   22.10    3.60
  10   2   0   32.80    4.00
  11  -2   0    0.20    1.50
  11  -2   0    2.20    1.40
  11  -2   0    3.30    1.60
  11  -2   0    1.10    2.00
  11  -2   0    1.90    2.10
  11   2   0   -1.80    1.50
 -11   2   0    5.60    1.80
  11   2   0    0.30    1.80
  12  -2   0    1.80    2.00
  12  -2   0    0.60    1.90
  12  -2   0   -1.40    2.00
  12  -2   0   -0.20    1.40
  12  -2   0    1.90    1.70
  12   2   0    4.20    2.30
  12   2   0    1.40    2.20
  12   2   0    3.40    1.80
 -12   2   0   -0.40    1.50
  13  -2   0   47.60    5.80
  13  -2   0   43.10    6.00
  13  -2   0   41.70    4.60
  13  -2   0   49.10    4.50
  13   2   0   48.70    7.80
  13   2   0   42.30    5.20
  14  -2   0   27.40    4.30
  14  -2   0   26.60    5.10
  14  -2   0   39.10    5.50
  14   2   0   31.00    5.10
  14   2   0   30.70    5.00
  15  -2   0   15.90    4.40
  15  -2   0   18.70    4.30
  15   2   0   12.90    3.80
  15   2   0   14.40    5.90
  15   2   0   14.40    3.90
  16  -2   0   92.99    9.60
  16  -2   0  112.09   10.20
  16   2   0  118.79   13.00
  16   2   0  117.99    9.70
  16   2   0  117.89   10.00
  17  -2   0   13.50    3.60
  17  -2   0   12.50    3.90
  17   2   0   25.00    4.40
  17   2   0   17.60    6.40
  17   2   0   25.60    5.10
  18  -2   0  180.68   14.00
  18  -2   0  181.28   14.40
  18   2   0  167.98   13.50
  18   2   0  161.18   13.80
  18   2   0  161.78   17.30
   0  -3   0    0.90    0.60
   0  -3   0    0.80    0.70
   0  -3   0    1.20    0.60
   0  -3   0    1.10    0.70
   0  -3   0    1.40    0.60
   0  -3   0    0.90    0.50
   0   3   0    0.80    0.50
   0   3   0    1.50    0.70
   0   3   0    1.40    0.70
   0   3   0    1.20    0.60
   0   3   0    0.80    0.60
   0   3   0    0.70    0.70
  -1  -3   0   86.59    5.30
  -1  -3   0   78.59    5.10
   1  -3   0   82.19    5.10
   1  -3   0   78.99    5.20
   1  -3   0   82.69    5.10
  -1  -3   0   85.79    4.90
  -1  -3   0   89.59    5.10
   1  -3   0   83.29    5.30
   1  -3   0   76.79    5.00
   1  -3   0   83.49    5.20
  -1  -3   0   70.29    5.20
   1   3   0   75.29    4.90
   1   3   0   78.49    5.10
  -1   3   0   90.59    5.30
  -1   3   0   82.29    5.10
   1   3   0   77.69    5.10
  -1   3   0   83.09    5.10
  -1   3   0   83.39    5.00
   3  -3   0 1731.83   98.69
   3  -3   0 1697.43   98.39
  -3  -3   0 1847.32   98.59
   3  -3   0 1698.83   98.29
  -3  -3   0 1643.34   98.49
   3  -3   0 1616.64   98.89
   3  -3   0 1927.61   98.99
   3  -3   0 1725.43   98.69
  -3  -3   0 1731.63   98.49
   3  -3   0 1775.52   98.89
  -3  -3   0 1781.22   98.39
  -3   3   0 1832.42   98.29
  -3   3   0 1814.12   98.69
   3   3   0 1848.32   99.19
  -3   3   0 1885.41   98.79
  -3   3   0 1954.10   98.29
   3   3   0 1633.64   98.39
  -3   3   0 1657.63   98.89
  -3   3   0 1905.11   99.09
   3   3   0 1686.93   98.49
  -3   3   0 1631.74   98.69
   3   3   0 1644.64   99.09
   4  -3   0   98.19    6.70
  -4  -3   0  111.69    6.70
   4  -3   0   97.79    7.10
   4  -3   0  103.89    6.50
   4  -3   0  108.39    7.10
  -4  -3   0  104.09    6.60
   4  -3   0  103.29    6.90
   4  -3   0  105.39    7.20
  -4  -3   0  112.59    6.60
   4   3   0  102.09    6.80
  -4   3   0   96.09    7.10
  -4   3   0  113.69    6.30
   4   3   0   88.09    7.20
   4   3   0   93.99    6.50
   4   3   0  101.39    6.50
   4   3   0  119.79    7.50
  -4   3   0  115.99    6.90
  -4   3   0  114.29    6.40
  -4   3   0  108.89    6.90
  -4   3   0  115.89    7.30
  -5  -3   0  556.04   32.90
  -5  -3   0  609.04   33.20
   5  -3   0  599.04   33.90
   5  -3   0  555.94   33.10
   5  -3   0  555.04   33.50
   5  -3   0  581.14   32.90
  -5  -3   0  601.64   33.00
   5  -3   0  576.24   33.50
  -5   3   0  609.24   33.20
  -5   3   0  589.14   33.80
   5   3   0  531.85   33.20
   5   3   0  574.54   32.80
   5   3   0  575.44   33.50
   5   3   0  559.44   33.00
  -5   3   0  600.54   33.00
   6  -3   0   45.30    4.30
   6  -3   0   37.10    3.30
  -6  -3   0   37.20    3.40
   6  -3   0   42.70    3.20
   6  -3   0   40.30    3.70
  -6  -3   0   44.80    3.10
   6  -3   0   39.00    3.70
  -6  -3   0   39.40    3.10
   6  -3   0   36.30    3.80
   6   3   0   39.40    3.30
   6   3   0   35.50    3.60
   6   3   0   38.20    2.90
  -6   3   0   44.40    3.40
   6   3   0   42.60    3.60
  -6   3   0   38.10    4.00
  -6   3   0   34.00    3.50
  -7  -3   0   18.90    2.00
   7  -3   0   21.30    3.00
   7  -3   0   25.00    2.50
   7  -3   0   12.30    2.40
  -7  -3   0   21.60    2.60
   7  -3   0   22.70    3.70
  -7  -3   0   17.40    2.10
   7  -3   0   23.90    2.30
   7  -3   0   21.50    3.00
   7   3   0   24.90    3.10
   7   3   0   19.90    2.40
  -7   3   0   25.60    3.20
  -7   3   0   18.40    2.90
  -7   3   0   17.80    2.20
   7   3   0   22.80    2.00
   7   3   0   17.80    2.60
   8  -3   0  285.67   17.50
   8  -3   0  274.97   15.90
  -8  -3   0  251.87   16.30
   8  -3   0  244.58   16.10
   8  -3   0  224.48   16.50
   8  -3   0  273.97   16.70
   8  -3   0  258.57   16.60
  -8  -3   0  259.37   15.30
   8   3   0  273.77   16.20
  -8   3   0  253.77   16.20
   8   3   0  276.17   16.40
  -8   3   0  262.17   15.60
   8   3   0  269.87   16.40
   9  -3   0   20.00    2.50
   9  -3   0   17.10    2.60
  -9  -3   0   16.60    2.90
   9  -3   0   20.20    3.80
   9  -3   0   16.70    2.90
   9  -3   0   19.90    3.40
  -9   3   0   19.00    2.30
  -9   3   0   15.00    3.10
   9   3   0   20.40    3.10
   9   3   0   16.10    2.90
   9   3   0   18.40    2.80
   9   3   0   24.40    3.90
  -9   3   0   22.50    3.20
  10  -3   0   -0.70    1.10
  10  -3   0    1.40    2.10
  10  -3   0    2.00    1.60
  10  -3   0    1.80    2.10
 -10  -3   0    1.90    1.50
  10  -3   0    0.90    1.70
 -10   3   0    1.70    0.90
  10   3   0    0.10    1.60
  10   3   0    1.30    1.70
  10   3   0    0.90    1.40
  10   3   0    2.20    1.70
 -10   3   0    1.70    1.60
  11  -3   0   57.29    4.90
 -11  -3   0   55.89    5.60
  11  -3   0   58.99    4.90
  11  -3   0   52.59    5.80
  11  -3   0   57.09    6.20
 -11   3   0   54.69    5.10
  11   3   0   53.09    5.30
  11   3   0   55.99    5.80
  11   3   0   57.19    5.40
  12  -3   0  169.98   12.90
  12  -3   0  194.18   11.90
  12  -3   0  189.28   14.10
  12  -3   0  173.08   11.80
  12  -3   0  178.18   13.00
  12   3   0  162.88   12.60
 -12   3   0  173.78   12.10
  12   3   0  178.28   12.40
  13  -3   0  111.69    8.40
  13  -3   0  118.09    8.30
  13  -3   0  105.89    9.50
  13  -3   0  112.49    9.50
  13   3   0  109.19   10.00
  13   3   0  109.49   11.10
  13   3   0  105.09    8.70
 -13   3   0  104.69    8.40
  14  -3   0    4.90    2.30
  14  -3   0    6.30    3.10
  14  -3   0   10.00    2.40
  14  -3   0    6.80    3.20
  14   3   0   11.20    2.80
  14   3   0   12.50    3.60
  14   3   0   12.10    5.00
  15  -3   0  140.09   12.30
  15  -3   0  148.39   12.30
  15   3   0  159.98   11.70
  15   3   0  158.78   14.60
  15   3   0  156.08   12.40
  16  -3   0   30.80    5.50
  16  -3   0   24.20    5.00
  16   3   0   32.50    7.70
  16   3   0   25.60    4.90
  16   3   0   29.40    5.00
  17  -3   0    2.10    2.50
  17  -3   0    4.80    2.90
  17   3   0    1.80    5.10
  17   3   0    1.70    2.90
  17   3   0    1.80    2.60
  18  -3   0    3.70    3.20
  18  -3   0    3.10    3.30
  18   3   0    4.40    5.20
  18   3   0   12.40    4.00
  18   3   0    2.70    2.80
   0  -4   0    5.40    1.20
   0  -4   0    7.60    1.60
   0  -4   0    5.20    1.30
   0  -4   0    6.10    1.20
   0  -4   0    6.50    1.20
   0   4   0    5.20    1.10
   0   4   0    4.00    1.10
   0   4   0    8.80    1.40
   0   4   0    6.80    1.30
   0   4   0    6.10    1.70
   0   4   0    9.60    1.50
   1  -4   0 1248.78   73.49
   1  -4   0 1318.87   73.69
   1  -4   0 1326.67   73.59
  -1  -4   0 1299.87   73.59
  -1  -4   0 1413.26   73.59
   1  -4   0 1314.57   73.59
   1  -4   0 1363.16   73.59
  -1  -4   0 1331.77   73.29
  -1  -4   0 1232.38   73.49
  -1  -4   0 1396.16   73.69
   1  -4   0 1354.76   73.49
  -1   4   0 1257.27   73.79
   1   4   0 1311.77   73.59
   1   4   0 1303.87   73.59
  -1   4   0 1267.47   73.59
   1   4   0 1221.08   73.59
  -1   4   0 1360.56   73.49
   1   4   0 1285.87   73.49
  -1   4   0 1350.06   73.69
  -1   4   0 1272.27   73.49
   1   4   0 1237.98   73.29
  -2  -4   0  660.83   38.20
   2  -4   0  672.63   38.20
   2  -4   0  709.53   38.30
   2  -4   0  642.64   38.20
  -2  -4   0  683.83   37.70
  -2  -4   0  688.23   37.70
  -2  -4   0  735.43   38.50
   2  -4   0  636.74   38.40
  -2  -4   0  636.04   38.20
  -2  -4   0  706.33   38.20
   2  -4   0  644.74   38.40
   2  -4   0  627.04   38.00
  -2   4   0  705.13   38.00
   2   4   0  629.14   38.20
   2   4   0  586.94   37.80
  -2   4   0  712.03   38.50
  -2   4   0  745.53   38.40
   2   4   0  652.93   38.10
  -2   4   0  725.03   38.30
   2   4   0  667.43   38.20
  -2   4   0  761.82   38.10
   2   4   0  636.64   38.40
  -2   4   0  642.24   38.10
  -2   4   0  637.84   38.20
   3  -4   0 1042.70   55.79
   3  -4   0  983.90   55.59
  -3  -4   0  923.21   55.49
  -3  -4   0 1060.09   55.19
   3  -4   0  853.01   55.79
  -3  -4   0  924.81   55.49
   3  -4   0  968.00   55.79
  -3  -4   0 1091.99   56.19
   3  -4   0  961.40   55.59
  -3  -4   0 1072.39   55.59
  -3   4   0 1000.10   55.69
   3   4   0  939.11   55.39
  -3   4   0 1050.69   55.69
  -3   4   0  937.51   55.79
   3   4   0  888.11   55.89
  -3   4   0 1085.99   56.09
   3   4   0  901.61   55.19
  -3   4   0  887.81   55.49
   3   4   0  967.40   55.59
  -3   4   0 1067.39   55.19
   3   4   0  963.90   55.59
  -3   4   0 1055.89   55.29
   4  -4   0 1202.28   69.39
  -4  -4   0 1300.97   68.99
   4  -4   0 1171.88   69.09
   4  -4   0 1269.07   69.49
  -4  -4   0 1150.58   68.89
  -4  -4   0 1281.87   68.79
   4  -4   0 1186.58   68.79
   4  -4   0 1269.37   69.69
   4  -4   0 1116.69   69.39
  -4   4   0 1299.77   68.69
  -4   4   0 1378.86   69.79
   4   4   0 1104.19   69.59
  -4   4   0 1327.77   69.19
   4   4   0 1180.58   68.79
  -4   4   0 1290.37   69.69
   4   4   0 1186.18   68.69
  -4   4   0 1303.67   68.59
  -4   4   0 1138.19   69.39
  -4   4   0 1092.79   69.19
   4   4   0 1215.78   69.19
   5  -4   0  111.59    8.50
   5  -4   0  123.79    8.50
  -5  -4   0  132.09    7.90
   5  -4   0  126.59    8.40
   5  -4   0  118.19    8.10
   5  -4   0  124.69    8.70
  -5  -4   0  122.69    7.90
   5  -4   0  130.69    7.80
  -5  -4   0  132.59    8.00
  -5   4   0  132.39    7.50
  -5   4   0  134.19    8.20
  -5   4   0  134.99    8.40
   5   4   0  118.89    8.20
  -5   4   0  131.59    7.60
   5   4   0  126.79    7.80
   5   4   0  134.69    8.60
  -5   4   0  132.69    8.80
   5   4   0  108.29    8.80
  -5   4   0  110.59    8.50
   5   4   0  129.49    7.80
   6  -4   0    5.80    1.70
   6  -4   0    2.80    1.60
  -6  -4   0    5.20    1.20
  -6  -4   0    4.50    1.10
   6  -4   0    2.90    1.20
   6  -4   0    4.30    1.10
   6  -4   0    3.10    1.40
   6  -4   0    3.10    1.70
  -6  -4   0    3.60    1.30
   6   4   0    3.00    1.80
  -6   4   0    3.60    1.60
   6   4   0    2.30    1.00
  -6   4   0    5.90    1.80
   6   4   0    4.00    1.10
   6   4   0    3.20    1.40
   6   4   0    2.60    1.40
  -6   4   0    4.30    1.30
  -6   4   0    3.80    1.00
   7  -4   0  900.51   54.49
  -7  -4   0  954.50   54.19
  -7  -4   0  974.60   53.59
   7  -4   0  979.40   53.89
   7  -4   0  984.20   55.19
   7  -4   0  978.40   54.79
   7  -4   0  823.62   54.59
  -7  -4   0  977.00   53.59
   7  -4   0  948.01   54.09
   7   4   0  972.00   53.59
   7   4   0 1011.50   54.49
  -7   4   0  928.11   54.99
  -7   4   0  953.40   54.39
   7   4   0  959.20   54.59
  -7   4   0  954.00   53.99
   7   4   0  994.60   54.09
   7   4   0  798.02   54.99
   8  -4   0    5.30    1.60
   8  -4   0    4.20    1.70
   8  -4   0    2.90    1.80
  -8  -4   0    2.00    1.20
   8  -4   0    2.00    1.20
  -8  -4   0    2.70    1.00
   8  -4   0    2.80    1.70
   8  -4   0    3.20    1.70
  -8   4   0    4.30    1.40
   8   4   0    1.70    2.40
   8   4   0    3.20    1.40
   8   4   0   -0.10    1.30
   8   4   0    2.50    1.10
   8   4   0    3.30    1.60
  -8   4   0    2.50    1.60
  -8   4   0    1.40    1.40
   9  -4   0   15.90    3.00
   9  -4   0   24.50    3.70
   9  -4   0   19.30    3.50
  -9  -4   0   26.50    3.40
   9  -4   0   20.90    2.90
   9  -4   0   12.70    2.90
  -9   4   0   24.30    4.30
  -9   4   0   21.70    2.50
   9   4   0   22.20    3.20
   9   4   0   21.40    3.30
   9   4   0   19.70    2.10
   9   4   0   16.90    4.30
   9   4   0   21.90    3.00
  -9   4   0   21.00    3.20
  10  -4   0  842.52   52.39
  10  -4   0  957.80   51.59
  10  -4   0  809.02   52.39
 -10  -4   0  871.61   52.79
  10  -4   0  966.70   53.59
  10  -4   0  984.00   51.49
  10   4   0  901.61   52.09
  10   4   0  943.61   52.19
 -10   4   0  833.12   50.69
  10   4   0  894.31   51.69
  10   4   0  867.31   53.59
 -10   4   0  846.32   51.79
  11  -4   0  295.87   17.10
  11  -4   0  269.97   18.10
  11  -4   0  275.97   18.00
 -11  -4   0  248.38   17.40
  11  -4   0  280.47   16.80
  11   4   0  264.87   17.60
  11   4   0  257.87   17.00
  11   4   0  265.07   19.20
 -11   4   0  256.97   17.20
  12  -4   0   30.40    7.20
  12  -4   0   24.20    4.40
  12  -4   0   29.10    3.90
  12  -4   0   22.40    3.20
  12  -4   0   21.80    4.70
  12   4   0   23.40    5.20
 -12   4   0   22.30    4.10
  12   4   0   24.90    4.50
  12   4   0   26.60    3.90
  13  -4   0    2.10    2.60
  13  -4   0    2.40    2.00
  13  -4   0    1.80    2.50
  13  -4   0    2.80    1.60
  13   4   0    1.10    3.50
  13   4   0   -0.90    1.80
 -13   4   0    1.80    2.00
  13   4   0    1.90    2.70
  14  -4   0   83.59    6.80
  14  -4   0   73.39    6.50
  14  -4   0   71.19    8.00
  14  -4   0  105.09    9.00
  14   4   0   72.89    7.20
  14   4   0   70.49    9.90
  14   4   0   85.89    8.10
  15  -4   0   92.39    9.20
  15  -4   0   93.79    9.10
  15   4   0   86.69    8.70
  15   4   0  101.89   11.50
  15   4   0   87.49    8.00
  16  -4   0   25.20    5.10
  16  -4   0   21.90    4.80
  16   4   0   23.80    6.90
  16   4   0   26.80    4.60
  16   4   0   24.80    5.00
  17  -4   0   22.10    4.80
  17  -4   0   22.90    4.80
  17   4   0   13.90    4.20
  17   4   0   19.50    6.80
  18  -4   0   54.09    7.80
  18  -4   0   38.40    6.80
  18   4   0   56.69   10.60
  18   4   0   45.50    6.50
  18   4   0   39.20    6.60
   0  -5   0   16.30    2.30
   1  -5   0 2076.89  111.19
  -1  -5   0 1821.22  110.99
  -1  -5   0 1876.61  110.99
   1  -5   0 1995.80  110.99
  -1  -5   0 1951.00  110.69
   1  -5   0 2105.49  110.99
  -1  -5   0 2081.49  111.09
   1  -5   0 1889.31  110.89
   1  -5   0 1896.51  111.09
   1  -5   0 2117.29  111.09
   1  -5   0 1925.11  110.99
  -1  -5   0 2051.19  110.99
  -1   5   0 2235.88  111.19
  -1   5   0 1998.80  110.99
  -1   5   0 1888.81  110.89
   1   5   0 2051.79  111.09
   1   5   0 1865.61  110.99
   1   5   0 1965.50  110.89
  -1   5   0 1889.01  110.99
   1   5   0 1953.00  111.39
  -1   5   0 2062.79  110.89
   1   5   0 1907.01  110.99
  -1   5   0 1953.90  111.09
   1   5   0 1900.91  110.69
   2  -5   0 4151.78  241.98
  -2  -5   0 4672.43  241.78
   2  -5   0 4339.37  241.88
   2  -5   0 4306.47  241.98
  -2  -5   0 4788.02  242.18
  -2  -5   0 3906.01  241.78
  -2  -5   0 4135.89  241.78
   2   5   0 4266.97  241.78
  -2   5   0 4780.12  241.98
  -2   5   0 4235.08  241.78
  -2   5   0 4070.99  241.88
   2   5   0 4267.87  241.38
   2   5   0 4271.57  241.68
  -2   5   0 4204.78  241.78
   2   5   0 4461.35  241.88
  -3  -5   0  353.86   19.90
   3  -5   0  378.96   20.20
  -3  -5   0  352.46   19.40
   3  -5   0  310.77   20.20
   3  -5   0  337.87   20.00
  -3  -5   0  378.76   20.50
  -3  -5   0  317.97   19.90
  -3  -5   0  365.26   19.30
   3  -5   0  309.37   19.90
  -3  -5   0  318.57   20.00
   3  -5   0  336.97   20.30
   3  -5   0  321.97   19.80
  -3   5   0  378.66   19.70
   3   5   0  330.77   19.50
  -3   5   0  369.86   20.20
  -3   5   0  365.06   20.20
  -3   5   0  324.17   20.10
  -3   5   0  373.06   20.50
   3   5   0  330.37   20.00
   3   5   0  311.27   20.30
  -3   5   0  367.16   19.70
   3   5   0  334.97   20.00
   3   5   0  322.87   19.40
  -3   5   0  322.87   19.90
   3   5   0  333.97   19.80
   4  -5   0 1165.28   67.39
   4  -5   0 1234.68   67.69
  -4  -5   0 1257.97   67.19
   4  -5   0 1043.40   67.59
   4  -5   0 1133.79   67.29
  -4  -5   0 1310.97   66.89
   4  -5   0 1184.48   67.69
  -4  -5   0 1138.19   67.09
  -4   5   0 1276.97   67.49
  -4   5   0 1243.38   67.49
  -4   5   0 1096.89   67.29
  -4   5   0 1230.28   66.69
   4   5   0 1179.28   67.39
   4   5   0 1156.48   66.79
  -4   5   0 1284.47   66.89
   4   5   0 1162.58   67.09
  -4   5   0 1329.67   68.09
  -4   5   0 1098.89   67.59
   4   5   0 1060.89   67.69
   5  -5   0  216.38   14.30
   5  -5   0  223.48   14.00
  -5  -5   0  230.18   13.60
  -5  -5   0  220.28   13.70
  -5  -5   0  234.88   13.70
   5  -5   0  230.38   14.20
   5  -5   0  248.48   14.60
   5  -5   0  187.28   14.20
   5  -5   0  234.48   13.50
   5   5   0  221.38   14.00
  -5   5   0  254.57   14.80
  -5   5   0  236.18   13.20
   5   5   0  226.18   14.30
  -5   5   0  223.98   14.50
   5   5   0  244.88   13.70
   5   5   0  218.38   13.50
  -5   5   0  218.88   14.10
  -5   5   0  228.08   14.10
  -5   5   0  244.28   14.00
  -5   5   0  242.18   13.40
   6  -5   0  103.29    8.80
   6  -5   0  119.19    8.40
  -6  -5   0  128.39    8.10
   6  -5   0  120.89    8.60
   6  -5   0  139.19    9.20
  -6  -5   0  128.79    8.10
   6  -5   0  123.79    8.90
   6  -5   0  129.09    8.00
   6   5   0  108.79    9.20
   6   5   0  130.19    8.70
  -6   5   0  141.79    8.50
   6   5   0  129.89    8.90
  -6   5   0  140.89    9.40
  -6   5   0  136.49    7.80
  -6   5   0  121.49    9.00
   6   5   0  133.99    8.10
  -6   5   0  137.39    8.80
   6   5   0  132.99    8.10
  -7  -5   0    4.30    1.20
  -7  -5   0    1.90    1.00
   7  -5   0    2.50    1.60
   7  -5   0    2.60    1.20
   7  -5   0    3.20    1.40
   7  -5   0    1.90    1.40
  -7  -5   0    0.80    1.10
   7  -5   0    3.10    1.00
   7  -5   0    2.70    1.70
  -7   5   0    3.50    1.50
  -7   5   0    0.30    1.50
   7   5   0   -1.40    1.50
   7   5   0    3.40    1.10
   7   5   0    0.90    1.30
   7   5   0    1.40    1.40
   7   5   0    2.60    1.10
  -7   5   0    4.10    1.30
   8  -5   0 1636.34   90.09
   8  -5   0 1671.93   91.39
  -8  -5   0 1580.64   90.49
   8  -5   0 1731.63   90.69
   8  -5   0 1615.24   91.09
  -8  -5   0 1609.54   89.69
   8  -5   0 1356.16   91.09
   8  -5   0 1637.44   91.69
  -8  -5   0 1568.64   89.69
  -8   5   0 1640.24   91.79
   8   5   0 1586.74   89.89
   8   5   0 1679.43   90.39
  -8   5   0 1541.25   90.79
  -8   5   0 1587.94   90.29
   8   5   0 1626.54   90.89
   8   5   0 1653.23   90.99
   8   5   0 1403.56   91.69
   9  -5   0  404.86   22.50
   9  -5   0  399.86   23.70
   9  -5   0  305.47   24.30
   9  -5   0  402.16   24.30
   9  -5   0  428.46   23.10
  -9  -5   0  370.06   23.00
   9  -5   0  380.96   23.80
  -9   5   0  384.66   22.50
   9   5   0  355.66   23.20
   9   5   0  333.37   24.30
   9   5   0  403.66   22.20
   9   5   0  387.76   23.40
   9   5   0  376.56   22.70
  -9   5   0  360.36   23.20
  10  -5   0 1133.59   74.19
  10  -5   0 1359.96   75.29
  10  -5   0 1325.97   74.59
 -10  -5   0 1263.87   73.79
  10  -5   0 1287.77   73.49
  10   5   0 1337.97   74.09
  10   5   0 1378.06   72.59
  10   5   0 1246.88   73.29
  10   5   0 1360.26   74.09
 -10   5   0 1258.87   73.89
  10   5   0 1260.87   75.39
 -10   5   0 1202.88   72.69
  11  -5   0   20.50    3.20
  11  -5   0   23.70    3.00
 -11  -5   0   19.70    3.30
  11  -5   0   16.60    3.70
  11  -5   0   23.70    4.20
 -11   5   0   17.70    3.30
  11   5   0   30.50    4.30
  11   5   0   17.80    3.10
  11   5   0   16.30    4.50
  11   5   0   15.60    3.70
  12  -5   0   22.40    3.10
  12  -5   0   27.60    5.30
  12  -5   0   26.60    4.90
  12  -5   0   21.00    4.00
  12  -5   0   26.00    3.80
  12   5   0   26.60    4.40
  12   5   0   25.70    5.50
 -12   5   0   26.60    4.10
  12   5   0   23.50    3.80
  13  -5   0    7.00    3.00
  13  -5   0    8.70    2.20
  13  -5   0    5.90    2.90
  13   5   0   -0.40    3.80
  13   5   0    7.20    2.90
  13   5   0    5.00    2.30
  14  -5   0    6.30    3.20
  14  -5   0   10.70    3.80
  14  -5   0    8.90    2.70
  14   5   0    8.80    4.50
  14   5   0    7.80    3.00
  14   5   0    3.30    3.20
  15  -5   0  144.79   13.30
  15  -5   0  151.98   11.00
  15  -5   0  141.89   12.40
  15   5   0  146.79   11.30
  15   5   0  152.58   12.10
  15   5   0  149.49   14.50
  16  -5   0   86.49    8.70
  16  -5   0   78.09    8.50
  16   5   0   78.39    7.60
  16   5   0   79.59   11.30
  16   5   0   83.19    8.50
  17  -5   0  252.87   17.80
  17   5   0  225.88   19.90
  17   5   0  216.58   16.60
  17   5   0  229.58   17.20
  18  -5   0   60.59    8.50
  18  -5   0   62.49    8.90
  18   5   0   59.19    7.00
  18   5   0   53.29   12.50
  18   5   0   67.29    7.80
   0  -6   0 6285.17  360.96
   0   6   0 6630.14  361.06
   1  -6   0 1033.70   59.79
   1  -6   0 1059.19   59.89
   1  -6   0 1006.50   59.99
   1  -6   0 1036.50   59.99
  -1  -6   0  979.80   59.89
   1  -6   0 1085.49   59.79
  -1  -6   0 1008.90   59.49
   1  -6   0 1164.68   59.99
  -1  -6   0 1126.09   59.89
  -1  -6   0 1147.69   59.99
  -1  -6   0  955.60   59.79
   1  -6   0 1162.58   59.89
   1   6   0 1017.00   59.89
  -1   6   0 1145.59   60.09
  -1   6   0 1097.49   59.79
  -1   6   0  964.50   59.89
   1   6   0 1030.30   59.59
   1   6   0 1154.08   59.89
  -1   6   0 1023.20   59.89
  -1   6   0  963.00   59.79
   1   6   0 1115.89   59.99
   1   6   0 1011.40   60.29
  -1   6   0 1031.50   59.79
  -2  -6   0 5037.90  302.37
  -2  -6   0 5259.07  302.37
   2  -6   0 5741.43  302.47
   2  -6   0 5337.97  302.57
   2  -6   0 5292.57  302.47
   2  -6   0 5334.97  302.27
   2   6   0 5796.12  301.97
  -2   6   0 5469.95  302.37
   2   6   0 5004.20  302.47
  -2   6   0 5047.19  302.37
   2   6   0 5278.67  302.37
   2   6   0 5548.25  302.37
   2   6   0 6153.88  302.97
   3  -6   0  455.35   28.80
  -3  -6   0  442.26   28.50
   3  -6   0  450.95   28.80
  -3  -6   0  531.55   28.50
   3  -6   0  520.05   28.70
  -3  -6   0  542.75   29.10
   3  -6   0  483.35   28.40
  -3  -6   0  511.15   27.90
   3  -6   0  478.95   28.60
  -3  -6   0  460.25   28.50
  -3  -6   0  514.35   27.90
   3   6   0  463.65   28.00
  -3   6   0  538.65   28.80
  -3   6   0  515.55   28.70
   3   6   0  433.66   28.80
  -3   6   0  556.34   28.40
   3   6   0  515.75   28.70
  -3   6   0  472.55   28.50
  -3   6   0  525.65   28.30
  -3   6   0  471.25   28.60
   3   6   0  472.95   28.60
   4  -6   0 1772.62  104.79
  -4  -6   0 1749.53  104.69
   4  -6   0 1621.14  104.99
  -4  -6   0 1959.20  104.59
  -4  -6   0 1764.02  104.59
   4  -6   0 1887.51  104.89
   4  -6   0 1759.22  105.09
  -4  -6   0 2034.70  104.09
   4  -6   0 1955.90  104.99
  -4  -6   0 1937.11  105.39
   4  -6   0 1796.32  104.49
  -4   6   0 1742.93  104.69
   4   6   0 1915.21  104.79
  -4   6   0 1906.61  104.89
  -4   6   0 1804.32  104.99
  -4   6   0 1989.00  104.19
   4   6   0 1873.81  104.79
  -4   6   0 1936.61  104.29
  -4   6   0 1936.41  105.39
   4   6   0 1843.92  104.59
   4   6   0 1837.62  104.19
   5  -6   0   27.30    3.00
   5  -6   0   27.10    2.90
  -5  -6   0   30.60    2.70
   5  -6   0   27.90    3.20
  -5  -6   0   29.40    2.80
  -5  -6   0   29.10    2.40
   5  -6   0   19.80    3.10
   5  -6   0   32.50    3.30
  -5   6   0   26.30    3.20
  -5   6   0   30.20    2.10
  -5   6   0   19.90    3.10
  -5   6   0   36.20    3.50
  -5   6   0   37.40    3.70
   5   6   0   28.20    2.40
   5   6   0   29.70    2.80
   5   6   0   28.10    3.10
  -5   6   0   28.00    2.50
  -5   6   0   24.90    2.90
   6  -6   0   28.70    2.50
   6  -6   0   24.20    3.00
   6  -6   0   31.00    3.50
   6  -6   0   26.30    2.90
  -6  -6   0   32.60    2.70
  -6  -6   0   24.70    2.50
  -6  -6   0   26.50    2.70
   6  -6   0   20.70    3.20
   6   6   0   16.90    3.20
  -6   6   0   31.80    3.40
  -6   6   0   24.20    2.90
   6   6   0   25.90    2.70
  -6   6   0   27.40    2.10
  -6   6   0   27.60    3.80
   6   6   0   29.10    2.50
  -6   6   0   29.00    3.70
   6   6   0   29.70    3.20
  -6   6   0   26.40    2.30
   6   6   0   24.60    3.30
   7  -6   0   14.80    2.70
  -7  -6   0   14.50    2.10
   7  -6   0   14.70    2.30
  -7  -6   0   17.20    2.10
   7  -6   0   20.00    3.20
   7  -6   0    9.40    2.40
  -7  -6   0   14.90    2.10
   7  -6   0   16.40    3.00
   7  -6   0   17.40    2.10
   7   6   0   16.10    2.70
  -7   6   0   16.00    2.50
  -7   6   0   16.70    1.70
   7   6   0    7.90    2.60
   7   6   0   16.80    2.80
   7   6   0   17.20    2.30
   7   6   0   15.10    2.10
  -7   6   0   17.90    2.80
   8  -6   0  190.08   11.70
   8  -6   0  190.78   12.80
   8  -6   0  200.68   13.40
   8  -6   0  156.48   12.90
   8  -6   0  218.08   12.70
   8  -6   0  212.58   13.40
  -8  -6   0  185.48   12.20
  -8  -6   0  195.88   11.60
  -8  -6   0  202.28   11.60
   8   6   0  178.48   13.70
  -8   6   0  178.38   13.30
  -8   6   0  206.18   12.30
   8   6   0  182.08   12.60
  -8   6   0  188.58   12.70
   8   6   0  194.68   11.90
   8   6   0  182.18   11.90
   9  -6   0  373.06   21.20
   9  -6   0  371.06   22.40
   9  -6   0  392.06   22.00
   9  -6   0  325.57   22.50
  -9  -6   0  346.27   21.70
   9  -6   0  391.06   23.20
   9  -6   0  381.26   22.80
   9   6   0  365.66   22.30
  -9   6   0  343.17   22.10
   9   6   0  327.97   23.20
   9   6   0  321.47   21.30
   9   6   0  333.57   22.00
   9   6   0  373.96   21.20
  10  -6   0  114.39    7.70
 -10  -6   0  106.59    8.30
  10  -6   0  107.79    9.20
  10  -6   0  112.19    9.50
  10  -6   0  124.49    8.60
  10  -6   0  105.49    9.30
  10   6   0  126.89    9.10
  10   6   0  126.69    7.80
 -10   6   0  107.09    7.70
  10   6   0  108.79   10.20
 -10   6   0  113.59    8.90
  10   6   0  121.29    8.20
  11  -6   0  289.87   19.40
 -11  -6   0  288.07   18.50
  11  -6   0  311.97   17.60
  11  -6   0  290.27   18.30
  11  -6   0  257.07   19.10
  11   6   0  302.47   20.60
  11   6   0  302.97   18.10
 -11   6   0  288.17   17.20
  11   6   0  280.97   20.20
 -11   6   0  264.67   18.50
  11   6   0  295.07   18.90
  12  -6   0  588.64   35.70
  12  -6   0  616.64   35.40
  12  -6   0  529.65   35.30
  12  -6   0  612.64   36.70
  12   6   0  576.14   36.90
  12   6   0  562.94   34.80
  12   6   0  536.05   34.80
  13  -6   0   31.50    5.40
  13  -6   0   40.40    4.90
  13  -6   0   31.30    5.60
  13   6   0   42.00    4.70
  13   6   0   40.60    7.60
  13   6   0   46.60    5.90
  14  -6   0  187.38   14.40
  14  -6   0  183.18   14.40
  14  -6   0  188.28   13.00
  14   6   0  186.38   12.90
  14   6   0  161.28   15.60
  14   6   0  191.58   14.10
  15  -6   0  137.29   12.40
  15  -6   0  130.29   10.80
  15  -6   0  166.38   12.90
  15   6   0  148.19   12.20
  15   6   0  152.08   14.40
  15   6   0  154.78   11.10
  16  -6   0    7.50    3.30
  16  -6   0    8.00    2.90
  16  -6   0    5.50    3.50
  16   6   0    9.50    4.80
  16   6   0   14.00    4.00
  16   6   0    6.40    3.00
  17  -6   0    1.70    3.00
  17  -6   0    0.50    3.00
  17   6   0    0.00    4.30
  17   6   0    2.50    2.40
  17   6   0    4.90    3.00
  18  -6   0   38.50    6.90
  18  -6   0   45.70    6.60
  18   6   0   51.09    7.10
  18   6   0   53.89    6.30
   0   7   0   38.50    3.30
   0   7   0   43.00    3.40
  -1  -7   0  268.77   16.00
  -1  -7   0  260.97   16.40
   1  -7   0  295.57   16.70
   1  -7   0  299.67   16.40
   1  -7   0  305.97   16.50
   1  -7   0  246.38   16.20
   1  -7   0  243.78   16.30
   1  -7   0  256.77   16.50
  -1  -7   0  302.27   16.50
  -1  -7   0  300.17   16.50
   1  -7   0  267.47   16.30
  -1   7   0  256.87   16.40
   1   7   0  254.37   16.80
   1   7   0  307.47   16.40
  -1   7   0  259.67   16.40
  -1   7   0  294.67   16.60
   1   7   0  275.17   16.40
  -1   7   0  260.57   16.30
   1   7   0  256.67   16.30
   1   7   0  254.97   16.40
  -1   7   0  298.67   16.30
   1   7   0  258.27   16.10
   2  -7   0 4785.82  272.27
   2  -7   0 4729.33  272.07
   2  -7   0 4532.25  271.87
  -2  -7   0 4374.96  271.97
  -2  -7   0 4354.36  271.87
   2  -7   0 5435.56  272.17
   2  -7   0 4465.75  271.87
  -2  -7   0 5422.06  272.07
  -2  -7   0 4772.72  271.47
  -2  -7   0 5470.75  272.37
   2  -7   0 4875.61  272.07
   2   7   0 4616.14  272.57
  -2   7   0 5374.66  272.27
   2   7   0 5201.98  272.07
   2   7   0 5355.26  271.97
  -2   7   0 4796.62  271.97
   2   7   0 4747.33  271.97
  -2   7   0 4443.76  271.97
   2   7   0 4554.24  271.57
  -2   7   0 5361.76  272.17
   2   7   0 4400.66  271.97
  -3  -7   0  846.72   53.19
   3  -7   0  940.51   53.29
   3  -7   0  874.11   53.39
   3  -7   0  923.91   53.09
   3  -7   0  879.31   53.49
  -3  -7   0  857.41   53.09
  -3  -7   0  978.40   53.59
   3  -7   0 1016.90   53.39
   3  -7   0  842.32   53.09
  -3  -7   0  979.60   53.09
  -3  -7   0  965.80   52.29
  -3  -7   0  949.80   52.49
   3  -7   0  978.70   53.19
  -3   7   0  878.31   52.99
   3   7   0  973.90   53.19
   3   7   0  923.21   52.99
  -3   7   0  972.40   52.89
  -3   7   0  881.61   53.19
   3   7   0  847.62   53.39
  -3   7   0  945.41   53.29
  -3   7   0 1021.50   53.39
  -3   7   0 1068.79   53.09
   3   7   0  937.51   52.59
   3   7   0  886.31   53.19
   4  -7   0 1266.37   70.79
  -4  -7   0 1135.49   70.89
   4  -7   0 1231.58   70.99
  -4  -7   0 1309.37   70.79
  -4  -7   0 1279.37   70.09
  -4  -7   0 1218.98   70.79
  -4  -7   0 1341.27   70.19
   4  -7   0 1303.97   71.09
   4  -7   0 1152.58   70.89
   4  -7   0 1212.58   71.29
  -4  -7   0 1321.87   71.59
  -4   7   0 1309.37   71.09
   4   7   0 1233.98   70.79
  -4   7   0 1292.67   70.39
   4   7   0 1305.57   70.19
  -4   7   0 1318.47   70.59
   4   7   0 1211.68   70.99
  -4   7   0 1235.48   70.89
   4   7   0 1089.99   71.29
  -4   7   0 1181.68   71.09
   4   7   0 1267.47   70.99
  -4   7   0 1259.77   71.09
  -5  -7   0  179.58   11.20
   5  -7   0  178.08   11.60
   5  -7   0  174.38   11.50
  -5  -7   0  178.28   11.20
   5  -7   0  158.18   11.40
   5  -7   0  166.28   11.80
  -5  -7   0  191.58   10.80
   5  -7   0  171.18   11.80
   5   7   0  198.28   10.80
  -5   7   0  184.78   10.90
  -5   7   0  184.38   10.60
   5   7   0  174.68   11.50
   5   7   0  184.68   11.20
  -5   7   0  188.38   11.50
   5   7   0  148.69   11.80
  -5   7   0  185.78   11.60
  -5   7   0  189.98   12.20
  -5   7   0  179.98   11.80
  -5   7   0  182.28   11.70
   6  -7   0    0.90    1.20
   6  -7   0    2.00    1.30
   6  -7   0    0.20    1.50
   6  -7   0    1.50    1.20
   6  -7   0    1.10    1.50
  -6  -7   0    1.50    0.90
  -6  -7   0    0.60    1.10
   6  -7   0    2.40    1.40
  -6  -7   0    1.60    0.90
   6   7   0    1.70    1.50
  -6   7   0    0.90    1.50
  -6   7   0    2.30    1.00
  -6   7   0    2.20    1.60
  -6   7   0    1.40    0.60
  -6   7   0    2.30    1.40
   6   7   0    0.70    1.90
   6   7   0    1.80    1.50
   6   7   0    1.70    0.90
  -6   7   0    0.20    1.40
   6   7   0    2.20    1.20
  -6   7   0    3.90    1.70
   7  -7   0    2.00    1.40
   7  -7   0    1.80    1.10
  -7  -7   0    3.40    1.20
   7  -7   0    3.40    2.10
  -7  -7   0    0.90    1.00
   7  -7   0    0.20    1.60
  -7  -7   0    1.10    1.20
   7  -7   0    3.10    1.70
  -7   7   0    2.70    1.60
   7   7   0    1.60    1.20
   7   7   0    1.60    1.70
   7   7   0   -0.10    1.80
  -7   7   0    0.40    1.10
   7   7   0    2.80    1.10
  -7   7   0   -0.20    1.50
  -7   7   0    3.60    1.00
  -7   7   0    1.80    1.40
   7   7   0   -0.10    1.40
   8  -7   0  736.23   46.80
   8  -7   0  801.62   47.10
   8  -7   0  855.21   46.30
   8  -7   0  848.42   47.10
  -8  -7   0  760.22   45.20
  -8  -7   0  816.42   45.30
   8  -7   0  846.32   47.10
  -8  -7   0  786.52   45.70
  -8   7   0  749.73   46.40
   8   7   0  757.12   45.50
   8   7   0  838.72   45.70
  -8   7   0  815.82   45.90
   8   7   0  805.42   46.60
   8   7   0  768.32   46.30
   8   7   0  728.13   47.30
  -9  -7   0  188.48   12.20
   9  -7   0  209.98   13.60
   9  -7   0  203.88   12.70
   9  -7   0  189.78   13.40
   9  -7   0  182.78   12.80
   9  -7   0  166.18   13.20
   9   7   0  203.88   12.00
   9   7   0  173.68   13.90
  -9   7   0  172.48   12.80
   9   7   0  202.58   12.10
  -9   7   0  186.68   12.10
   9   7   0  174.28   12.80
  10  -7   0  407.76   25.10
 -10  -7   0  362.66   23.40
  10  -7   0  398.66   23.80
  10  -7   0  397.16   24.80
  10   7   0  402.66   23.00
  10   7   0  368.76   25.40
 -10   7   0  356.46   24.00
  10   7   0  407.56   23.30
  10   7   0  371.56   24.10
  11  -7   0   18.40    3.70
  11  -7   0   20.40    4.60
  11  -7   0   27.30    4.40
  11   7   0   22.20    3.30
  11   7   0   24.40    2.70
  11   7   0   17.10    3.80
  11   7   0   17.50    4.90
 -11   7   0   21.30    2.50
  12  -7   0   85.69    7.30
 -12  -7   0   79.49    7.10
  12  -7   0   83.89    8.20
  12  -7   0   73.79    8.00
  12  -7   0   92.19    8.60
  12   7   0   85.39    6.80
  12   7   0   89.49    9.80
  12   7   0   85.29    9.50
  13  -7   0   21.60    3.80
  13  -7   0   13.40    4.20
  13  -7   0   13.20    3.70
  13   7   0   21.50    5.60
  13   7   0   23.00    4.50
  13   7   0   19.30    3.40
  14  -7   0  134.09   11.70
  14  -7   0  116.39   11.20
  14  -7   0  146.59   10.50
  14   7   0  110.19   10.80
  14   7   0  146.49   10.20
  14   7   0  119.89   12.70
  15  -7   0   90.99    9.60
  15  -7   0   96.39    8.40
  15  -7   0  114.19   10.20
  15   7   0   90.99    9.40
  15   7   0  102.09    8.30
  15   7   0   84.99   11.40
  16  -7   0  191.48   16.20
  16  -7   0  204.08   16.30
  16  -7   0  213.98   14.90
  16   7   0  206.68   18.10
  16   7   0  233.78   16.30
  16   7   0  217.08   14.80
  17  -7   0  103.09   10.40
  17  -7   0   96.19   10.30
  17   7   0  108.19    9.80
  17   7   0   88.49    8.60
  17   7   0  120.29   13.00
  18  -7   0   52.99    7.80
  18  -7   0   57.69    8.40
  18   7   0   41.60    9.70
  18   7   0   55.99    7.80
  18   7   0   42.50    6.00
   0  -8   0 1511.15   93.89
   0  -8   0 1720.43   94.69
   0  -8   0 1885.51   94.49
   0  -8   0 1559.84   94.29
   0  -8   0 1813.82   94.39
   0  -8   0 1526.95   94.39
   0   8   0 1533.05   94.29
   0   8   0 1842.02   94.49
   0   8   0 1518.65   94.09
   0   8   0 1864.81   94.29
   0   8   0 1594.64   94.59
   0   8   0 1669.93   94.09
  -1  -8   0   26.70    2.80
  -1  -8   0   24.10    2.40
   1  -8   0   20.40    2.60
   1  -8   0   25.60    3.10
   1  -8   0   25.80    2.70
  -1  -8   0   16.50    2.60
  -1  -8   0   27.60    2.90
   1  -8   0   22.70    2.80
   1  -8   0   24.70    2.70
  -1  -8   0   25.10    3.00
   1  -8   0   27.00    3.10
   1  -8   0   27.40    2.90
   1   8   0   25.30    2.70
  -1   8   0   24.30    2.90
   1   8   0   25.10    2.60
   1   8   0   23.50    2.90
   1   8   0   26.10    2.90
  -1   8   0   30.60    2.90
  -1   8   0   18.30    2.50
   1   8   0   21.90    2.70
  -1   8   0   26.70    3.00
  -1   8   0   28.40    2.70
   1   8   0   31.10    3.60
   2  -8   0  466.55   27.20
   2  -8   0  492.25   27.00
   2  -8   0  499.35   27.20
  -2  -8   0  503.65   27.40
  -2  -8   0  494.35   27.10
   2  -8   0  485.75   27.30
   2  -8   0  409.26   27.20
  -2  -8   0  453.55   27.10
   2  -8   0  443.86   27.00
  -2  -8   0  393.96   27.00
   2  -8   0  420.36   26.90
  -2  -8   0  452.15   26.50
   2   8   0  449.06   27.10
   2   8   0  404.66   27.00
   2   8   0  486.85   27.00
   2   8   0  487.05   27.20
  -2   8   0  441.76   27.00
  -2   8   0  484.35   27.10
   2   8   0  490.15   26.70
  -2   8   0  412.06   26.90
  -2   8   0  482.45   27.20
  -2   8   0  497.65   26.90
   2   8   0  469.35   27.80
   3  -8   0  595.94   35.20
   3  -8   0  599.34   35.50
  -3  -8   0  563.54   35.30
  -3  -8   0  629.64   35.70
   3  -8   0  669.13   35.50
  -3  -8   0  662.13   34.40
  -3  -8   0  596.74   34.50
  -3  -8   0  582.54   35.20
   3  -8   0  615.34   35.40
   3  -8   0  568.54   35.60
   3  -8   0  644.94   35.30
   3   8   0  620.04   35.10
  -3   8   0  641.94   35.40
  -3   8   0  589.44   35.20
  -3   8   0  661.03   35.00
  -3   8   0  536.25   35.30
   3   8   0  619.24   35.30
  -3   8   0  636.64   35.50
   3   8   0  568.44   35.30
   3   8   0  550.94   35.40
   3   8   0  603.14   34.70
  -3   8   0  615.54   35.30
   4  -8   0 1515.35   86.79
  -4  -8   0 1542.95   86.89
   4  -8   0 1658.13   87.29
  -4  -8   0 1621.14   86.89
  -4  -8   0 1577.24   86.09
  -4  -8   0 1588.64   87.59
   4  -8   0 1480.45   87.39
   4  -8   0 1522.15   87.09
  -4  -8   0 1554.84   87.09
   4  -8   0 1476.75   87.29
   4  -8   0 1523.65   86.99
   4  -8   0 1380.46   86.89
  -4  -8   0 1589.64   85.99
  -4   8   0 1576.24   86.49
   4   8   0 1457.25   86.99
  -4   8   0 1654.13   87.19
  -4   8   0 1614.14   86.49
  -4   8   0 1482.65   87.09
  -4   8   0 1515.15   86.89
   4   8   0 1535.15   86.79
   4   8   0 1341.47   87.19
   4   8   0 1491.45   86.99
  -4   8   0 1490.65   87.09
   4   8   0 1622.14   86.19
  -5  -8   0  284.17   15.60
   5  -8   0  245.08   16.80
   5  -8   0  271.27   16.60
  -5  -8   0  261.97   16.10
   5  -8   0  256.07   16.50
  -5  -8   0  286.27   16.30
   5   8   0  231.78   16.90
  -5   8   0  269.57   16.50
   5   8   0  274.67   16.30
  -5   8   0  275.67   16.00
   5   8   0  267.77   16.60
  -5   8   0  273.77   16.50
  -5   8   0  272.47   16.70
  -5   8   0  262.17   16.70
  -5   8   0  262.87   16.40
  -6  -8   0    9.00    1.50
   6  -8   0    7.40    1.90
   6  -8   0    8.90    2.40
   6  -8   0    6.50    2.20
  -6  -8   0   11.40    1.90
   6  -8   0    3.20    1.60
  -6  -8   0    9.50    1.90
   6  -8   0    6.70    1.70
  -6   8   0    6.70    2.10
  -6   8   0    6.10    2.00
   6   8   0    8.20    2.20
   6   8   0    5.10    2.30
   6   8   0   10.20    2.00
  -6   8   0    9.60    2.20
   6   8   0   10.80    1.60
  -6   8   0    9.30    2.30
   6   8   0    6.80    2.10
  -7  -8   0  302.97   17.90
   7  -8   0  290.47   19.10
   7  -8   0  301.47   18.70
   7  -8   0  290.77   19.10
  -7  -8   0  295.67   17.90
   7  -8   0  301.67   18.90
   7  -8   0  283.47   18.40
   7  -8   0  300.77   18.80
  -7  -8   0  322.47   18.20
   7   8   0  316.77   18.80
  -7   8   0  282.97   18.30
  -7   8   0  273.07   18.60
   7   8   0  311.67   18.10
  -7   8   0  295.47   17.60
   7   8   0  281.57   17.60
  -7   8   0  310.57   19.10
   7   8   0  309.67   19.00
   8  -8   0  158.88   11.00
  -8  -8   0  162.58   10.30
   8  -8   0  169.78   11.90
  -8  -8   0  159.18   10.10
   8  -8   0  151.98   11.60
  -8  -8   0  170.28   10.10
   8  -8   0  169.08   11.60
   8  -8   0  158.28   11.70
   8   8   0  160.78   10.20
  -8   8   0  154.68   11.20
   8   8   0  169.08   10.50
   8   8   0  157.48   11.20
  -8   8   0  155.88   10.60
   8   8   0  158.28   11.40
  -8   8   0  157.28    9.90
   8   8   0  147.09   12.10
   9  -8   0   46.60    5.50
   9  -8   0   53.89    4.90
   9  -8   0   41.80    4.90
   9  -8   0   40.00    5.50
   9  -8   0   38.50    4.60
  -9  -8   0   42.00    4.00
  -9   8   0   45.30    4.80
   9   8   0   31.40    5.80
  -9   8   0   45.80    4.30
   9   8   0   48.40    4.20
   9   8   0   49.30    4.20
   9   8   0   41.90    4.80
  10  -8   0   54.99    6.30
  10  -8   0   60.09    6.40
  10  -8   0   73.29    6.60
  10  -8   0   51.99    6.30
 -10  -8   0   56.89    4.90
  10   8   0   43.20    6.40
  10   8   0   58.29    4.90
  10   8   0   54.49    5.90
 -10   8   0   55.99    4.80
  10   8   0   62.99    5.00
  11  -8   0   97.39    9.30
  11  -8   0  108.49    9.60
  11  -8   0  113.49    8.70
 -11  -8   0  108.89    8.30
  11   8   0  113.99    9.20
  11   8   0  111.89   10.60
  11   8   0  112.09    7.80
  11   8   0  112.39    8.00
  12  -8   0   32.50    4.50
  12  -8   0   33.40    5.60
 -12  -8   0   31.00    4.20
  12  -8   0   20.10    4.30
  12  -8   0   28.80    5.20
  12   8   0   21.80    5.20
  12   8   0   33.40    5.10
  12   8   0   33.50    4.20
  12   8   0   25.60    3.10
  13  -8   0  165.28   13.90
  13  -8   0  196.08   14.60
  13  -8   0  172.08   13.00
  13   8   0  184.08   15.70
  13   8   0  186.88   13.80
  13   8   0  197.58   12.70
  14  -8   0  216.38   16.00
  14  -8   0  180.78   15.40
  14  -8   0  205.68   14.50
  14   8   0  210.38   15.30
  14   8   0  208.08   14.00
  14   8   0  230.08   23.00
  15  -8   0   36.00    5.10
  15  -8   0   22.60    5.10
  15  -8   0   26.30    5.50
  15   8   0   31.20    7.20
  15   8   0   28.30    5.10
  15   8   0   29.50    4.50
  16  -8   0    6.40    3.40
  16  -8   0    0.90    2.20
  16  -8   0    0.60    3.10
  16   8   0    5.20    2.70
  16   8   0    2.40    2.60
  16   8   0    4.90    4.20
  17  -8   0    4.20    3.90
  17  -8   0    8.30    3.70
  17  -8   0   10.10    3.10
  17   8   0    6.10    2.90
  17   8   0    1.20    4.70
  18  -8   0   92.69   10.50
  18   8   0   72.29    8.10
  18   8   0   97.79    9.50
  18   8   0   90.89   13.20
   0  -9   0    0.30    1.20
   0  -9   0    1.30    1.50
   0  -9   0    1.00    1.40
   0  -9   0    1.50    1.10
   0  -9   0   -0.60    1.10
   0  -9   0    0.70    1.10
   0  -9   0    2.00    1.20
   0   9   0    0.80    1.20
   0   9   0    2.80    1.50
   0   9   0    1.30    1.40
   0   9   0    1.20    1.60
   0   9   0    1.30    1.30
   0   9   0    1.30    1.10
  -1  -9   0  903.51   47.00
  -1  -9   0  746.63   46.90
  -1  -9   0  758.62   46.30
   1  -9   0  873.01   47.30
  -1  -9   0  715.13   46.80
   1  -9   0  838.62   46.70
   1  -9   0  724.73   47.00
  -1  -9   0  912.81   46.90
   1  -9   0  789.12   46.60
   1  -9   0  894.51   46.90
   1  -9   0  771.22   46.80
   1  -9   0  872.71   47.00
   1   9   0  764.62   46.80
  -1   9   0  866.61   47.10
   1   9   0  852.81   47.50
  -1   9   0  836.72   46.80
   1   9   0  726.93   46.70
   1   9   0  885.21   46.80
   1   9   0  876.51   47.00
  -1   9   0  793.62   46.90
  -1   9   0  883.61   46.70
   1   9   0  826.62   46.60
  -1   9   0  724.13   46.80
  -1   9   0  715.23   46.60
  -2  -9   0  607.54   36.00
   2  -9   0  621.14   36.60
  -2  -9   0  637.44   36.80
   2  -9   0  653.63   36.90
   2  -9   0  606.44   36.60
  -2  -9   0  620.94   36.70
   2  -9   0  558.24   36.30
  -2  -9   0  686.83   36.70
   2  -9   0  682.33   36.80
  -2  -9   0  588.14   36.70
   2  -9   0  565.24   36.80
   2  -9   0  681.13   36.60
  -2   9   0  661.23   36.70
   2   9   0  631.64   36.50
   2   9   0  682.13   36.70
  -2   9   0  666.03   36.40
   2   9   0  610.34   36.60
   2   9   0  617.14   37.30
  -2   9   0  646.14   36.70
   2   9   0  650.93   36.70
  -2   9   0  643.44   36.60
  -2   9   0  546.45   36.40
  -3  -9   0 2353.36  137.39
  -3  -9   0 2516.75  137.59
   3  -9   0 2518.95  137.49
  -3  -9   0 2484.15  137.29
   3  -9   0 2447.06  137.39
   3  -9   0 2223.68  137.49
   3  -9   0 2296.07  137.09
   3  -9   0 2096.89  136.99
   3  -9   0 2563.24  137.19
  -3  -9   0 2575.54  137.19
   3  -9   0 2520.65  137.39
  -3  -9   0 2451.15  136.39
  -3  -9   0 2578.64  136.19
  -3   9   0 2601.84  137.39
  -3   9   0 2581.74  137.39
   3   9   0 2495.35  137.29
  -3   9   0 2524.65  136.89
   3   9   0 2344.07  137.29
   3   9   0 2427.86  137.09
  -3   9   0 2438.66  137.19
   3   9   0 2633.44  136.69
   3   9   0 2442.16  138.19
  -3   9   0 2102.69  137.09
   3   9   0 2171.68  137.29
  -3   9   0 2466.45  137.19
  -4  -9   0   97.99    7.20
   4  -9   0   81.89    6.80
   4  -9   0   82.69    6.50
  -4  -9   0   87.09    5.70
   4  -9   0   94.59    6.90
   4  -9   0   79.19    6.90
  -4  -9   0   89.29    6.40
   4  -9   0   74.89    6.50
  -4  -9   0   95.29    5.50
  -4  -9   0   94.39    6.60
   4  -9   0   95.69    6.80
   4   9   0   86.19    6.70
  -4   9   0   96.49    6.60
   4   9   0   89.89    5.90
   4   9   0   90.89    6.70
  -4   9   0   82.59    6.70
   4   9   0   83.29    6.40
  -4   9   0   90.69    6.20
  -4   9   0   93.29    6.70
   4   9   0   77.19    6.90
  -4   9   0   98.89    6.30
  -4   9   0  104.29    6.90
   5  -9   0   72.99    5.90
   5  -9   0   67.79    5.60
  -5  -9   0   82.59    6.50
  -5  -9   0   74.79    5.00
  -5  -9   0   75.39    4.60
   5  -9   0   76.99    5.90
   5  -9   0   58.89    5.60
  -5  -9   0   71.59    5.40
   5  -9   0   66.99    6.20
  -5  -9   0   72.39    5.60
   5   9   0   72.79    5.50
  -5   9   0   63.39    5.70
  -5   9   0   74.39    5.70
  -5   9   0   74.09    6.00
   5   9   0   67.39    5.80
   5   9   0   81.19    5.90
   5   9   0   60.49    6.20
  -5   9   0   71.09    5.20
  -5   9   0   73.29    4.90
  -5   9   0   74.89    5.80
  -6  -9   0   75.99    5.30
   6  -9   0   92.79    7.10
   6  -9   0   88.39    7.00
   6  -9   0   79.89    6.40
   6  -9   0   84.19    6.40
  -6  -9   0   80.59    6.00
  -6  -9   0   73.99    6.20
   6   9   0   75.59    6.00
  -6   9   0   78.39    6.20
  -6   9   0   92.19    6.50
  -6   9   0   71.19    5.60
   6   9   0   79.79    7.20
   6   9   0   80.69    6.80
  -6   9   0   94.19    6.90
   6   9   0   86.59    6.60
  -6   9   0   70.59    6.40
  -7  -9   0   17.90    2.50
   7  -9   0   15.40    3.00
   7  -9   0   19.40    3.70
   7  -9   0   16.60    3.60
   7  -9   0   16.50    2.90
  -7  -9   0   18.80    2.70
   7  -9   0   14.60    2.80
  -7  -9   0   18.20    2.10
  -7   9   0   16.80    2.30
   7   9   0   18.10    2.70
  -7   9   0   17.30    3.20
   7   9   0   20.50    2.40
   7   9   0   18.60    3.40
   7   9   0   14.30    3.60
  -7   9   0   20.10    3.00
   7   9   0   16.40    3.20
  -7   9   0   16.80    3.00
  -7   9   0   16.60    3.10
  -8  -9   0 1069.69   62.39
  -8  -9   0 1107.59   62.39
   8  -9   0 1170.18   64.39
   8  -9   0 1130.89   64.19
  -8  -9   0 1077.09   62.39
   8  -9   0 1098.99   63.59
   8  -9   0 1067.89   63.29
   8   9   0 1055.99   63.49
   8   9   0 1189.48   62.49
  -8   9   0 1058.29   63.69
  -8   9   0 1136.29   63.99
   8   9   0 1121.29   62.89
  -8   9   0 1074.89   62.99
   8   9   0 1006.10   64.29
   9  -9   0   54.89    5.90
   9  -9   0   47.70    5.90
   9  -9   0   53.89    5.80
  -9  -9   0   48.80    3.80
   9  -9   0   47.10    5.60
   9  -9   0   49.40    5.40
  -9  -9   0   49.70    3.80
  -9  -9   0   42.50    4.10
   9   9   0   46.70    5.20
  -9   9   0   45.60    4.60
   9   9   0   51.39    4.60
   9   9   0   54.89    4.40
  10  -9   0  190.18   12.60
  10  -9   0  177.08   13.00
  10  -9   0  183.38   13.50
  10  -9   0  162.48   13.20
 -10  -9   0  179.28   11.80
  10   9   0  176.68   11.80
 -10   9   0  172.88   11.70
  10   9   0  183.38   12.80
  10   9   0  193.18   11.70
  10   9   0  164.78   13.90
  11  -9   0   74.59    7.80
 -11  -9   0   70.69    6.20
  11  -9   0   78.99    7.90
  11  -9   0   77.89    7.00
  11   9   0   70.89    6.00
  11   9   0   77.49    7.30
  11   9   0   74.89    8.70
 -11   9   0   73.59    5.90
  11   9   0   88.39    6.40
  12  -9   0   30.20    5.00
  12  -9   0   37.10    5.90
 -12  -9   0   27.20    4.10
  12  -9   0   25.60    5.10
  12  -9   0   36.90    5.10
  12   9   0   29.40    3.70
  12   9   0   29.60    6.30
  12   9   0   28.70    5.00
  12   9   0   39.70    4.20
  13  -9   0   38.30    5.60
  13  -9   0   30.10    5.60
  13  -9   0   34.50    6.00
  13   9   0   46.60    6.60
  13   9   0   39.20    3.80
  13   9   0   36.20    6.90
  13   9   0   48.00    6.10
  14  -9   0   62.89    8.40
  14  -9   0   57.89    6.40
  14   9   0   67.29    6.10
  14   9   0   61.29    9.70
  14   9   0   60.89    7.80
  15  -9   0   59.09    8.30
  15  -9   0   42.90    7.20
  15  -9   0   69.59    6.70
  15   9   0   69.09    7.50
  15   9   0   56.09    5.90
  15   9   0   66.29   10.10
  16  -9   0   -0.10    2.10
  16  -9   0    1.10    2.80
  16   9   0   -0.50    4.90
  16   9   0    4.20    3.10
  16   9   0    0.00    2.20
  17  -9   0   26.70    5.80
  17  -9   0   31.90    6.20
  17  -9   0   40.20    5.70
  17   9   0   34.70    6.00
  17   9   0   41.30    5.40
  17   9   0   30.50    7.90
  18  -9   0   92.59   10.50
  18  -9   0   93.69   10.60
  18   9   0   82.59   12.50
  18   9   0  104.79   10.20
   0 -10   0 1285.27   68.69
   0 -10   0 1101.09   68.69
   0 -10   0 1289.07   68.59
   0 -10   0 1177.78   68.19
   0 -10   0 1265.97   69.19
   0 -10   0 1219.28   68.19
   0  10   0 1269.37   68.79
   0  10   0 1198.38   68.39
   0  10   0 1018.00   68.29
   0  10   0 1256.07   68.39
   0  10   0 1309.87   69.09
   0  10   0 1035.70   68.39
   1 -10   0  678.33   36.60
  -1 -10   0  613.84   36.10
   1 -10   0  586.94   36.60
  -1 -10   0  615.44   36.70
  -1 -10   0  669.73   36.70
  -1 -10   0  563.64   36.60
   1 -10   0  547.15   36.70
  -1 -10   0  665.03   36.60
   1 -10   0  615.24   36.30
   1 -10   0  621.34   36.90
   1 -10   0  674.63   36.70
   1 -10   0  655.33   36.50
   1  10   0  634.74   37.20
  -1  10   0  634.54   36.80
  -1  10   0  547.55   36.50
   1  10   0  654.83   36.50
   1  10   0  559.74   36.40
   1  10   0  677.33   36.80
  -1  10   0  666.33   36.40
  -1  10   0  660.53   36.80
  -1  10   0  554.94   36.40
   1  10   0  590.64   36.60
   1  10   0  693.03   36.40
  -1  10   0  683.83   36.70
   2 -10   0    0.90    1.30
   2 -10   0   -0.10    1.40
  -2 -10   0    1.90    1.00
  -2 -10   0    2.50    1.50
   2 -10   0    2.10    1.40
  -2 -10   0    2.30    1.30
   2 -10   0    0.70    1.40
   2 -10   0    1.00    1.10
   2 -10   0    3.60    1.60
   2 -10   0    3.50    1.40
  -2 -10   0    0.80    1.50
  -2 -10   0    1.90    1.30
  -2  10   0    1.00    1.30
  -2  10   0    0.30    1.20
   2  10   0    3.60    1.60
   2  10   0    2.00    1.30
   2  10   0    0.80    1.50
  -2  10   0    1.60    1.50
  -2  10   0    0.80    1.20
   2  10   0    2.10    2.00
  -2  10   0    2.20    1.20
   2  10   0    2.90    1.30
   2  10   0    1.90    1.50
  -3 -10   0  203.08   13.20
   3 -10   0  188.98   13.10
   3 -10   0  206.28   13.10
   3 -10   0  185.28   13.30
  -3 -10   0  215.98   13.20
  -3 -10   0  215.38   13.40
   3 -10   0  220.98   13.00
   3 -10   0  176.78   12.80
  -3 -10   0  222.88   11.90
  -3 -10   0  205.18   12.20
  -3 -10   0  208.88   13.00
   3 -10   0  194.48   13.00
   3 -10   0  201.28   13.20
   3  10   0  204.28   12.90
  -3  10   0  210.58   13.20
   3  10   0  196.88   13.10
  -3  10   0  213.78   13.20
  -3  10   0  211.28   12.70
  -3  10   0  213.08   13.00
   3  10   0  178.58   13.10
   3  10   0  210.68   13.20
   3  10   0  214.98   14.30
  -3  10   0  200.98   12.90
  -3  10   0  173.18   12.90
  -4 -10   0  948.01   52.19
   4 -10   0  911.91   52.19
  -4 -10   0  946.01   52.09
  -4 -10   0  891.41   51.19
   4 -10   0  931.11   52.59
   4 -10   0  921.41   52.39
   4 -10   0  886.81   52.39
  -4 -10   0  904.41   52.69
  -4 -10   0  950.60   50.89
   4 -10   0  791.52   52.49
   4  10   0  744.73   52.19
   4  10   0  880.71   52.29
  -4  10   0  915.41   52.09
   4  10   0  951.00   51.49
   4  10   0  887.91   51.99
  -4  10   0  952.60   51.89
   4  10   0  893.41   52.19
  -4  10   0  918.01   52.39
  -4  10   0  921.21   51.69
  -4  10   0  934.41   52.29
  -4  10   0  902.51   52.29
   5 -10   0  548.55   33.60
   5 -10   0  613.14   34.10
   5 -10   0  530.75   33.90
   5 -10   0  488.95   33.20
  -5 -10   0  570.44   32.20
  -5 -10   0  558.44   32.10
  -5 -10   0  586.74   33.30
  -5 -10   0  560.24   33.10
   5 -10   0  587.44   33.70
  -5  10   0  575.84   32.90
   5  10   0  564.04   33.20
   5  10   0  582.84   33.50
  -5  10   0  592.74   33.60
   5  10   0  498.05   33.80
   5  10   0  597.04   32.50
  -5  10   0  559.74   32.60
   5  10   0  539.25   33.50
  -5  10   0  595.04   33.40
  -5  10   0  558.04   33.70
  -5  10   0  614.64   33.80
   6 -10   0   33.20    4.70
  -6 -10   0   26.50    3.00
   6 -10   0   30.30    3.60
  -6 -10   0   30.20    2.40
  -6 -10   0   30.50    3.70
   6 -10   0   31.90    3.60
   6 -10   0   29.80    3.50
   6 -10   0   26.90    4.00
  -6  10   0   34.20    4.40
  -6  10   0   30.70    3.60
   6  10   0   31.20    4.20
  -6  10   0   25.10    2.40
  -6  10   0   26.30    3.00
   6  10   0   28.50    4.10
  -6  10   0   32.90    4.00
  -6  10   0   28.20    3.90
   6  10   0   25.90    3.30
   6  10   0   24.10    4.20
  -7 -10   0  382.26   23.00
  -7 -10   0  370.86   22.40
   7 -10   0  398.16   23.90
   7 -10   0  353.76   23.60
   7 -10   0  375.26   24.40
  -7  10   0  421.26   24.20
  -7  10   0  357.56   23.60
  -7  10   0  394.96   22.90
  -7  10   0  375.36   23.90
  -7  10   0  385.96   23.50
   7  10   0  423.56   24.10
   7  10   0  403.66   23.40
   8 -10   0   92.69    7.80
  -8 -10   0   72.39    5.70
  -8 -10   0   83.99    6.00
   8 -10   0   75.19    7.30
  -8 -10   0   75.89    5.60
   8 -10   0   79.49    6.80
   8 -10   0   74.39    9.30
  -8  10   0   94.99    7.50
   8  10   0   82.59    6.30
  -8  10   0   84.89    6.60
   8  10   0   78.39    7.00
  -8  10   0   77.69    5.80
   8  10   0   78.09    8.10
  -9 -10   0  202.08   11.90
  -9 -10   0  186.98   11.80
   9 -10   0  211.98   14.30
   9 -10   0  199.58   13.30
  -9 -10   0  172.88   12.00
   9  10   0  188.48   13.40
   9  10   0  177.28   14.40
   9  10   0  189.08   12.60
  -9  10   0  190.48   12.50
  -9  10   0  191.68   12.70
   9  10   0  210.18   12.30
  10 -10   0  412.66   25.40
  10 -10   0  410.86   24.30
 -10 -10   0  357.26   23.10
  10 -10   0  393.16   25.20
  10  10   0  416.26   23.20
  10  10   0  376.96   23.40
 -10  10   0  359.06   23.40
  10  10   0  371.76   25.60
  10  10   0  389.06   24.50
  11 -10   0  128.29   11.00
  11 -10   0  148.69   11.30
 -11 -10   0  126.99    9.10
  11 -10   0  129.89   10.10
  11  10   0  123.39   10.30
  11  10   0  137.49    9.00
 -11  10   0  122.09    8.90
  11  10   0  122.19    9.10
  11  10   0  115.09   11.60
  12 -10   0   40.60    5.50
  12 -10   0   32.70    5.90
  12 -10   0   27.70    5.60
  12  10   0   45.40    4.40
  12  10   0   34.00    4.20
  12  10   0   27.30    6.40
  12  10   0   42.80    5.80
  13 -10   0  214.48   15.80
  13 -10   0  201.88   14.40
  13 -10   0  187.58   15.40
  13  10   0  213.78   15.20
  13  10   0  191.08   13.20
  13  10   0  201.78   16.70
  13  10   0  207.38   13.50
  14 -10   0   34.60    6.00
  14 -10   0   42.40    5.90
  14 -10   0   31.30    5.90
  14  10   0   38.80    7.80
  14  10   0   39.70    6.10
  14  10   0   38.60    4.70
  15 -10   0   73.59    8.70
  15 -10   0   87.29    7.90
  15 -10   0   74.49    8.40
  15  10   0   81.19    7.10
  15  10   0   83.79    8.50
  15  10   0   62.29    9.90
  16 -10   0    9.10    2.70
  16 -10   0   11.90    4.10
  16 -10   0    6.30    3.90
  16  10   0    6.70    5.40
  16  10   0    2.50    3.10
  16  10   0   11.00    3.20
  17 -10   0    2.00    3.50
  17 -10   0    5.40    3.00
  17 -10   0    1.30    3.80
  17  10   0    1.60    3.40
  17  10   0   -4.50    4.50
  17  10   0   -1.30    2.70
   0 -11   0    0.70    1.10
   0 -11   0   -1.40    1.30
   0 -11   0    1.30    1.20
   0 -11   0    0.50    1.20
   0 -11   0   -1.30    1.20
   0 -11   0    0.80    1.40
   0 -11   0    0.20    1.50
   0  11   0   -1.30    1.00
   0  11   0    0.60    1.50
   0  11   0    0.40    1.30
   0  11   0    0.80    1.30
   0  11   0    0.80    1.20
   0  11   0    1.70    1.40
   1 -11   0   10.30    2.30
   1 -11   0   11.40    2.40
  -1 -11   0    4.50    1.80
   1 -11   0    8.80    2.00
  -1 -11   0   12.70    2.60
   1 -11   0    4.40    1.90
  -1 -11   0    7.70    1.70
  -1 -11   0    7.50    2.00
   1 -11   0    6.40    2.00
  -1 -11   0    3.10    1.70
   1 -11   0    6.70    2.00
   1 -11   0    8.30    2.00
   1  11   0   11.80    2.90
  -1  11   0    5.10    2.00
   1  11   0    6.00    1.80
  -1  11   0    6.80    1.70
   1  11   0    5.90    2.10
   1  11   0    4.40    1.70
  -1  11   0    5.40    1.80
  -1  11   0    8.30    2.20
  -1  11   0    7.10    2.20
   1  11   0   10.40    2.30
  -1  11   0    8.00    2.00
   1  11   0    8.30    2.00
   2 -11   0   26.40    3.40
  -2 -11   0   18.80    2.90
  -2 -11   0   16.10    3.00
  -2 -11   0   20.80    3.10
   2 -11   0   20.80    3.20
  -2 -11   0   24.40    3.10
   2 -11   0   18.20    3.20
   2 -11   0   27.60    3.60
  -2 -11   0   21.50    2.50
   2 -11   0   29.20    3.80
   2 -11   0   19.60    3.00
   2 -11   0   18.80    3.10
   2  11   0   23.80    3.20
  -2  11   0   31.50    3.90
  -2  11   0   22.20    2.80
   2  11   0   15.50    2.70
   2  11   0   29.00    4.70
  -2  11   0   27.00    3.60
  -2  11   0   28.30    3.70
   2  11   0   23.10    2.80
   2  11   0   22.20    3.10
  -2  11   0   22.30    3.30
  -3 -11   0  155.78    9.80
  -3 -11   0  167.88    9.50
   3 -11   0  135.19   10.50
  -3 -11   0  174.28   10.90
   3 -11   0  168.48   10.90
   3 -11   0  166.78   10.90
   3 -11   0  125.29   10.80
   3 -11   0  136.89   10.40
  -3 -11   0  157.98   10.90
   3 -11   0  162.18   10.60
   3 -11   0  161.68   10.90
  -3 -11   0  152.58   10.90
  -3 -11   0  172.38   10.70
   3  11   0  159.38   10.70
   3  11   0  157.18   10.80
   3  11   0  151.88   10.40
   3  11   0  175.08   10.30
  -3  11   0  167.28   10.90
  -3  11   0  154.48   10.30
  -3  11   0  169.38   10.90
  -3  11   0  135.59   10.50
   3  11   0  178.28   12.00
  -3  11   0  159.38   10.50
  -3  11   0  154.38   10.60
  -4 -11   0    0.10    0.50
  -4 -11   0    0.00    1.40
   4 -11   0   -1.20    1.10
   4 -11   0    1.60    1.30
   4 -11   0    0.30    1.60
   4 -11   0   -0.10    1.20
  -4 -11   0    0.40    1.50
  -4 -11   0    0.10    0.90
   4 -11   0   -0.70    1.20
  -4 -11   0    0.80    1.10
   4 -11   0    1.80    1.30
  -4  11   0    0.40    1.10
   4  11   0    1.10    1.40
   4  11   0    0.80    1.20
   4  11   0    1.60    2.30
   4  11   0   -1.50    1.50
  -4  11   0    0.30    1.40
  -4  11   0    0.40    1.30
   4  11   0    1.00    1.70
  -4  11   0    1.50    1.30
   4  11   0   -0.60    1.40
  -4  11   0   -0.70    0.90
  -4  11   0    0.40    1.30
   5 -11   0  694.73   40.40
  -5 -11   0  735.33   40.10
  -5 -11   0  686.73   38.70
   5 -11   0  745.53   40.80
  -5 -11   0  701.13   39.00
  -5 -11   0  690.33   40.90
  -5 -11   0  673.03   39.80
   5 -11   0  696.53   40.20
   5 -11   0  708.23   40.40
   5 -11   0  579.54   40.50
  -5  11   0  685.63   39.60
   5  11   0  619.94   40.50
  -5  11   0  687.63   39.40
   5  11   0  705.83   39.20
  -5  11   0  723.43   40.20
  -5  11   0  763.52   40.60
  -5  11   0  608.44   40.20
   5  11   0  698.43   40.00
   5  11   0  600.24   42.40
  -5  11   0  699.33   40.30
   5  11   0  645.84   40.20
  -6 -11   0  369.56   20.70
  -6 -11   0  388.66   21.90
  -6 -11   0  357.66   21.60
   6 -11   0  315.47   21.90
   6 -11   0  357.96   22.70
   6 -11   0  331.37   22.20
   6 -11   0  360.16   22.90
   6 -11   0  366.86   22.40
  -6  11   0  352.46   22.10
  -6  11   0  346.97   20.80
   6  11   0  339.17   22.80
   6  11   0  383.76   22.50
  -6  11   0  366.96   22.50
  -6  11   0  379.86   23.40
   6  11   0  368.16   21.90
  -6  11   0  370.66   21.60
   6  11   0  352.36   22.60
  -6  11   0  350.36   22.00
   7 -11   0   81.89    7.20
  -7 -11   0   70.89    5.10
   7 -11   0   72.19    7.20
  -7 -11   0   68.69    5.70
   7 -11   0   73.69    6.90
  -7 -11   0   74.79    6.00
   7 -11   0   94.29    9.80
  -7  11   0   69.79    6.20
   7  11   0   75.49    7.70
  -7  11   0   70.39    6.40
   7  11   0   86.69    7.10
  -7  11   0   76.79    5.80
   7  11   0   80.89    6.20
  -7  11   0   81.19    6.90
   8 -11   0   43.10    5.10
   8 -11   0   47.60    6.90
   8 -11   0   51.29    5.00
   8 -11   0   55.29    5.80
  -8 -11   0   49.70    4.40
  -8 -11   0   44.30    4.10
  -8  11   0   45.30    4.10
   8  11   0   44.70    5.30
  -8  11   0   46.30    5.10
   8  11   0   41.90    6.10
  -8  11   0   46.30    4.70
  -8  11   0   42.40    5.00
  -9 -11   0  124.99    8.20
  -9 -11   0  129.49    8.10
   9 -11   0  121.29    9.40
  -9 -11   0  110.49    7.90
   9 -11   0  139.49   10.50
   9 -11   0  148.29   10.70
  -9  11   0  117.99    8.10
   9  11   0  114.09   10.70
  -9  11   0  107.79    8.60
   9  11   0  107.59    9.40
   9  11   0  121.59    9.40
  10 -11   0    7.10    3.10
 -10 -11   0    8.10    1.90
  10 -11   0   11.00    3.60
  10 -11   0   15.20    3.50
  10  11   0    5.10    2.20
  10  11   0    3.30    3.50
  10  11   0    8.40    5.30
 -10  11   0   10.00    2.40
  11 -11   0  122.49   10.50
 -11 -11   0  106.59    8.00
  11 -11   0  127.79    9.60
  11 -11   0  128.29   10.50
 -11  11   0  111.09    8.30
  11  11   0  108.99    8.60
  11  11   0  104.49   11.00
  11  11   0  109.39    9.70
  12 -11   0  177.88   14.70
  12 -11   0  191.28   13.90
  12 -11   0  199.88   15.10
  12  11   0  198.18   14.40
  12  11   0  204.88   12.70
  12  11   0  194.78   16.00
  12  11   0  171.08   15.50
  13 -11   0  290.17   19.90
  13 -11   0  288.97   21.10
  13 -11   0  301.07   21.20
  13  11   0  328.07   20.70
  13  11   0  266.87   18.60
  13  11   0  302.97   18.70
  13  11   0  323.97   22.60
  14 -11   0    5.10    3.00
  14 -11   0    4.30    3.50
  14 -11   0    5.10    3.00
  14  11   0    8.90    3.30
  14  11   0    6.60    2.50
  14  11   0    7.40    4.80
  15 -11   0   11.70    4.10
  15 -11   0   15.90    4.00
  15 -11   0   22.50    5.90
  15  11   0   14.70    5.80
  15  11   0   19.60    4.60
  16 -11   0    6.40    3.40
  16 -11   0    5.40    3.60
  16  11   0    1.20    3.50
  16  11   0   -4.40    3.90
  17 -11   0   40.40    6.00
  17 -11   0   34.70    7.00
  17 -11   0   34.70    7.20
  17  11   0   29.60    6.10
  17  11   0   39.20    9.90
   0 -12   0  956.60   60.59
   0 -12   0 1060.29   60.99
   0 -12   0 1055.59   60.39
   0 -12   0 1081.59   60.49
   0 -12   0 1108.99   59.99
   0 -12   0 1109.29   60.09
   0  12   0  887.81   59.99
   0  12   0 1085.79   60.89
   0  12   0 1111.99   60.29
   0  12   0 1038.00   60.09
   0  12   0 1038.10   60.49
   1 -12   0  698.93   38.50
  -1 -12   0  681.53   38.70
  -1 -12   0  653.63   37.80
  -1 -12   0  704.93   37.80
  -1 -12   0  555.14   38.30
  -1 -12   0  670.03   38.30
   1 -12   0  678.03   38.90
  -1 -12   0  664.13   38.40
   1 -12   0  593.84   38.50
   1 -12   0  657.73   38.20
   1 -12   0  655.63   38.00
   1 -12   0  701.63   38.20
   1 -12   0  554.24   38.20
   1  12   0  707.53   39.20
   1  12   0  744.23   38.30
  -1  12   0  693.93   38.60
  -1  12   0  670.93   38.10
   1  12   0  578.04   38.10
  -1  12   0  683.63   38.30
   1  12   0  682.93   38.50
   1  12   0  558.14   38.20
   1  12   0  631.24   38.10
  -1  12   0  582.34   38.30
  -1  12   0  660.93   38.50
   2 -12   0  112.79    9.00
   2 -12   0  132.39    8.90
  -2 -12   0  132.99    9.00
   2 -12   0  131.39    9.00
   2 -12   0  106.89    9.20
   2 -12   0  125.19    9.40
  -2 -12   0  129.49    8.40
  -2 -12   0  122.89    9.10
   2 -12   0  130.09    9.10
   2 -12   0  123.19    8.80
  -2 -12   0  137.09    9.40
  -2 -12   0  126.39    9.30
  -2  12   0  137.39    9.20
   2  12   0  125.89    9.10
   2  12   0  134.49   10.00
  -2  12   0  116.19    9.00
  -2  12   0  128.19    8.70
  -2  12   0  146.09    9.30
   2  12   0  121.69    8.80
   2  12   0  119.79    9.10
   2  12   0  124.29    8.60
  -2  12   0  114.29    8.80
  -3 -12   0   82.39    6.10
   3 -12   0   92.19    7.30
  -3 -12   0   89.09    6.90
  -3 -12   0   92.89    7.20
  -3 -12   0   90.39    5.70
   3 -12   0   93.89    7.20
  -3  12   0   90.99    6.70
   3  12   0   90.19    8.10
   3  12   0   89.59    6.90
  -3  12   0   94.59    7.20
   3  12   0   76.19    7.00
  -3  12   0   90.09    7.00
   3  12   0   87.09    7.10
   3  12   0  102.79    6.70
   3  12   0   80.79    7.10
  -4 -12   0   13.30    1.40
   4 -12   0   13.10    3.00
   4 -12   0   14.00    3.00
  -4 -12   0   14.80    2.80
  -4 -12   0   11.60    2.80
   4 -12   0   12.90    2.90
  -4 -12   0   16.00    2.20
   4 -12   0    9.30    2.40
  -4 -12   0   16.50    2.80
   4 -12   0   13.50    2.80
   4 -12   0   16.90    2.90
   4  12   0   13.20    3.20
   4  12   0   17.70    2.60
   4  12   0   19.00    4.30
   4  12   0   10.90    2.40
  -4  12   0   14.10    2.70
  -4  12   0   16.10    2.90
  -4  12   0   15.90    2.80
  -4  12   0   15.90    2.60
   4  12   0    8.20    2.50
   4  12   0   10.30    2.40
  -4  12   0   16.90    3.20
  -4  12   0   17.60    3.00
   5 -12   0  597.34   39.70
   5 -12   0  595.84   39.10
  -5 -12   0  690.53   38.00
  -5 -12   0  635.24   39.00
   5 -12   0  614.54   39.10
   5 -12   0  676.53   39.50
   5 -12   0  743.63   40.00
   5 -12   0  675.83   39.50
  -5 -12   0  660.83   38.90
  -5  12   0  681.13   39.40
   5  12   0  670.43   39.50
   5  12   0  643.14   39.70
  -5  12   0  669.43   38.70
   5  12   0  678.93   39.80
   5  12   0  672.63   38.30
  -5  12   0  686.23   38.60
  -5  12   0  756.62   39.60
  -5  12   0  666.13   39.10
  -5  12   0  604.64   39.40
   5  12   0  676.53   39.40
  -6 -12   0  943.61   54.39
   6 -12   0  993.60   56.69
  -6 -12   0  982.90   54.59
   6 -12   0  938.31   55.69
   6 -12   0  944.11   55.09
   6  12   0  960.50   55.09
  -6  12   0  924.01   54.79
  -6  12   0 1002.50   55.19
  -6  12   0  922.91   54.69
  -6  12   0  896.21   54.19
   6  12   0  869.81   55.39
  -6  12   0  946.41   53.49
   6  12   0  940.71   54.59
   7 -12   0  328.07   20.80
   7 -12   0  336.67   24.90
   7 -12   0  295.97   20.50
  -7 -12   0  322.67   18.90
   7 -12   0  375.06   21.60
  -7 -12   0  338.87   20.10
  -7 -12   0  308.97   19.80
  -7  12   0  312.67   19.80
  -7  12   0  308.17   20.40
   7  12   0  298.47   21.30
  -7  12   0  315.37   20.40
  -7  12   0  326.97   20.90
   7  12   0  362.06   21.10
   7  12   0  343.57   20.30
   8 -12   0  196.18   13.90
   8 -12   0  214.38   14.90
   8 -12   0  223.48   14.70
  -8 -12   0  203.88   12.90
  -8 -12   0  199.38   12.10
  -8 -12   0  187.08   12.70
   8 -12   0  201.28   14.70
   8  12   0  206.98   13.40
   8  12   0  205.78   15.00
  -8  12   0  211.68   13.00
  -8  12   0  187.88   13.40
   8  12   0  185.58   13.90
  -8  12   0  195.88   14.00
  -8  12   0  199.88   13.80
   9 -12   0   48.70    5.50
  -9 -12   0   48.50    4.30
  -9 -12   0   47.10    3.90
   9 -12   0   55.99    6.90
   9 -12   0   51.39    6.60
  -9 -12   0   50.29    4.10
   9  12   0   46.30    6.80
   9  12   0   48.10    6.10
  -9  12   0   50.39    4.30
  -9  12   0   51.39    5.00
  -9  12   0   43.60    5.50
   9  12   0   41.50    4.80
 -10 -12   0  472.35   29.00
  10 -12   0  506.15   30.70
  10 -12   0  547.55   32.00
  10 -12   0  563.14   31.90
  10  12   0  482.65   32.00
  10  12   0  475.65   29.90
 -10  12   0  470.05   29.80
 -10  12   0  470.75   29.00
  10  12   0  505.15   30.90
  11 -12   0  139.49   12.00
  11 -12   0  144.19   11.20
  11 -12   0  162.38   12.30
  11  12   0  150.98   11.50
  11  12   0  141.19   12.80
  11  12   0  131.29   10.30
 -11  12   0  134.59   10.00
  12 -12   0   70.89    7.80
  12 -12   0   71.49    7.10
  12 -12   0   64.49    7.90
  12  12   0   72.09    7.70
  12  12   0   76.09    9.70
  12  12   0   47.90    5.90
  13 -12   0  182.48   14.50
  13 -12   0  169.08   13.40
  13  12   0  185.58   14.10
  14 -12   0   79.39    8.90
  14 -12   0   76.39    8.70
  14 -12   0   62.89    7.40
  14  12   0   76.29    8.00
  14  12   0   77.29   10.50
  15 -12   0   17.70    4.60
  15 -12   0   13.50    4.30
  15 -12   0   21.10    5.30
  15  12   0   26.10    5.00
  15  12   0   19.10    6.00
  16 -12   0  113.19   11.70
  16 -12   0  128.39   12.10
  16 -12   0  123.39   10.90
  16  12   0  124.79   12.50
  16  12   0  135.89   14.10
  17 -12   0    2.60    3.30
  17 -12   0    2.90    4.40
  17 -12   0    7.20    4.00
  17  12   0    6.00    6.20
  17  12   0   10.60    3.80
   0 -13   0    2.20    1.80
   0 -13   0    0.10    1.60
   0 -13   0    1.50    1.30
   0 -13   0    1.00    1.30
   0 -13   0    3.40    1.70
   0  13   0   -0.60    1.50
   0  13   0   -0.70    1.20
   0  13   0    0.90    2.00
   0  13   0    1.00    1.50
   1 -13   0    9.20    2.50
   1 -13   0   20.90    2.90
   1 -13   0   16.70    2.90
  -1 -13   0   20.70    3.90
   1 -13   0   13.40    2.60
  -1 -13   0   15.40    3.30
  -1 -13   0   10.10    2.60
   1 -13   0   17.60    3.30
  -1 -13   0   16.40    3.00
   1 -13   0   19.00    3.70
  -1 -13   0   18.60    2.60
  -1 -13   0   16.90    2.70
   1 -13   0   13.30    3.30
  -1  13   0   18.40    3.30
  -1  13   0   12.60    2.80
   1  13   0   11.50    2.80
   1  13   0   17.70    3.70
  -1  13   0   14.70    2.70
   1  13   0   15.10    3.00
   1  13   0   18.30    2.90
  -1  13   0   16.90    3.10
  -1  13   0   11.40    2.50
  -1  13   0   14.20    3.00
   1  13   0   14.80    3.20
   1  13   0   15.30    2.90
  -2 -13   0  613.94   36.70
   2 -13   0  531.65   36.70
   2 -13   0  644.94   37.00
   2 -13   0  624.64   36.60
   2 -13   0  634.74   36.40
   2 -13   0  645.54   36.40
  -2 -13   0  647.84   35.60
  -2 -13   0  653.63   36.80
  -2 -13   0  590.54   35.70
   2 -13   0  647.24   36.40
  -2 -13   0  640.24   36.50
   2  13   0  640.84   37.50
   2  13   0  564.84   36.40
  -2  13   0  596.64   36.10
   2  13   0  605.54   36.60
   2  13   0  556.64   36.50
  -2  13   0  627.74   37.50
   2  13   0  622.24   36.30
  -2  13   0  642.64   38.30
  -2  13   0  629.24   36.60
   2  13   0  609.34   36.10
  -2  13   0  584.64   36.40
  -3 -13   0   79.89    6.60
  -3 -13   0   92.79    7.10
  -3 -13   0   73.39    6.80
  -3 -13   0   87.59    5.40
   3 -13   0   80.99    6.50
  -3 -13   0   82.29    5.90
   3 -13   0   94.19    7.40
   3 -13   0   82.69    6.70
   3 -13   0   70.19    7.20
   3 -13   0   89.89    7.00
  -3  13   0   75.49    7.30
   3  13   0   82.09    6.30
  -3  13   0   79.99    6.70
  -3  13   0   80.19    6.80
   3  13   0   85.39    6.90
   3  13   0   81.49    7.00
   3  13   0   75.99    6.90
   3  13   0   81.89    6.60
   3  13   0   98.49    8.40
  -3  13   0   74.49    6.20
  -3  13   0   78.69    6.90
   4 -13   0   11.00    3.10
  -4 -13   0   13.70    2.90
   4 -13   0   12.10    2.60
  -4 -13   0   13.10    1.50
  -4 -13   0   18.50    3.00
   4 -13   0    7.20    2.10
   4 -13   0   18.00    3.50
   4 -13   0   15.70    3.30
   4 -13   0   11.40    2.90
  -4 -13   0   14.60    2.20
  -4  13   0   15.10    2.80
   4  13   0   13.00    2.90
   4  13   0   17.20    2.50
   4  13   0    9.60    2.20
  -4  13   0   16.70    3.10
  -4  13   0   18.20    3.10
   4  13   0   11.90    3.00
   4  13   0   15.50    4.50
  -4  13   0   14.90    2.70
   4  13   0   12.70    3.20
   5 -13   0  348.57   25.60
   5 -13   0  405.96   25.40
  -5 -13   0  375.66   24.90
  -5 -13   0  434.06   24.90
   5 -13   0  397.86   25.50
  -5 -13   0  428.86   23.90
   5  13   0  431.86   28.20
   5  13   0  403.16   25.20
   5  13   0  379.56   25.90
  -5  13   0  402.36   25.00
  -5  13   0  401.96   24.60
   5  13   0  425.46   25.00
  -5  13   0  429.56   24.60
   5  13   0  421.56   25.50
   5  13   0  438.46   24.30
   6 -13   0  519.75   35.70
   6 -13   0  604.34   36.40
   6 -13   0  518.65   37.70
  -6 -13   0  612.54   35.60
   6 -13   0  619.84   36.20
  -6 -13   0  593.74   35.40
  -6 -13   0  608.24   34.40
  -6  13   0  592.04   35.30
  -6  13   0  598.64   34.60
  -6  13   0  611.04   36.70
   6  13   0  580.84   36.50
   6  13   0  612.74   35.70
  -6  13   0  625.64   35.80
   6  13   0  665.53   36.50
  -6  13   0  625.74   36.10
   7 -13   0    1.50    2.10
  -7 -13   0    0.50    1.20
  -7 -13   0    0.40    1.50
   7 -13   0    1.50    2.30
   7 -13   0    0.00    2.00
   7 -13   0    2.60    1.90
  -7  13   0   -0.40    1.30
  -7  13   0   -0.10    1.80
   7  13   0   -1.60    2.10
  -7  13   0   -0.20    1.70
  -7  13   0   -0.80    1.40
   7  13   0    0.70    2.50
   7  13   0   -0.10    1.50
  -8 -13   0  966.10   54.59
  -8 -13   0  904.41   54.39
   8 -13   0 1068.09   56.59
   8 -13   0  869.21   55.49
   8 -13   0  966.00   56.69
  -8  13   0  939.61   55.79
   8  13   0  970.40   56.69
   8  13   0  910.31   56.49
  -8  13   0  889.61   55.89
  -8  13   0  935.61   54.59
  -8  13   0 1008.60   56.69
  -9 -13   0   24.70    2.80
   9 -13   0   19.40    4.20
   9 -13   0   28.50    5.00
   9 -13   0   29.00    5.00
  -9 -13   0   23.60    3.20
  -9  13   0   21.20    4.20
   9  13   0   27.30    4.60
   9  13   0   16.30    4.50
  -9  13   0   20.70    3.10
  10 -13   0  385.76   24.40
  10 -13   0  404.06   25.70
  10 -13   0  436.36   25.60
 -10  13   0  364.26   23.50
 -10  13   0  360.56   22.70
  10  13   0  371.76   25.60
  10  13   0  349.57   24.30
  11 -13   0  167.48   12.60
  11 -13   0  187.38   14.10
  11 -13   0  164.78   13.30
 -11  13   0  151.88   11.40
  11  13   0  162.48   12.80
  11  13   0  166.48   14.40
  12 -13   0  241.38   19.30
  12 -13   0  287.77   18.80
  12 -13   0  267.87   19.60
  12  13   0  275.57   18.90
  12  13   0  269.27   20.30
  13 -13   0   38.60    6.70
  13 -13   0   40.80    6.30
  13 -13   0   55.59    8.00
  13  13   0   44.10    6.80
  13  13   0   42.40    8.10
  14 -13   0    4.80    3.10
  14 -13   0    7.40    3.80
  14 -13   0    9.50    4.00
  14  13   0    4.90    2.90
  14  13   0    8.00    5.30
  15 -13   0   76.89    9.10
  15 -13   0   94.09    9.80
  15 -13   0   77.59    8.30
  15  13   0   68.19   10.20
  15  13   0   73.99    8.70
  16 -13   0   23.90    4.40
  16 -13   0   23.60    5.60
  16 -13   0   22.40    5.60
  16  13   0   20.20    5.50
  16  13   0   30.40    8.00
  17 -13   0   45.60    7.10
  17 -13   0   46.70    8.00
  17 -13   0   29.60    7.10
  17  13   0   40.50    6.60
  17  13   0   45.10    9.40
   0 -14   0 2901.11  165.98
   0 -14   0 3023.00  166.98
   0 -14   0 2997.60  166.58
   0 -14   0 3139.59  165.48
   0 -14   0 2984.60  165.58
   0  14   0 2890.51  165.88
   0  14   0 2955.90  166.48
   0  14   0 2964.60  166.28
   0  14   0 2877.51  165.78
   0  14   0 2646.54  165.78
  -1 -14   0 1005.40   57.49
  -1 -14   0 1085.09   58.69
  -1 -14   0 1011.10   58.19
   1 -14   0  980.10   58.09
   1 -14   0  959.70   57.69
  -1 -14   0 1046.00   57.29
   1 -14   0  987.80   58.59
   1 -14   0 1014.90   58.69
  -1 -14   0  992.20   57.99
   1 -14   0 1035.10   57.79
   1 -14   0 1008.20   57.99
  -1  14   0  915.81   57.89
   1  14   0 1104.49   59.09
  -1  14   0 1025.40   58.39
  -1  14   0 1022.60   57.89
  -1  14   0  904.51   58.19
   1  14   0  991.60   57.79
   1  14   0 1055.09   57.99
  -1  14   0  993.90   58.19
   1  14   0  929.81   57.89
  -1  14   0  932.51   57.89
   1  14   0 1028.60   58.29
  -2 -14   0  895.21   56.69
   2 -14   0  883.61   56.39
   2 -14   0 1007.90   56.89
   2 -14   0  986.60   57.19
   2 -14   0 1043.40   56.49
   2 -14   0 1050.89   56.59
  -2 -14   0  958.00   55.79
  -2 -14   0 1072.19   57.19
  -2 -14   0  975.90   56.59
   2 -14   0  871.01   56.99
  -2 -14   0 1062.29   55.69
   2  14   0  992.40   56.89
   2  14   0  979.10   56.49
  -2  14   0  985.90   56.39
  -2  14   0  991.70   56.89
   2  14   0  850.11   56.59
   2  14   0  920.81   56.59
  -2  14   0  942.41   56.59
   2  14   0 1058.39   57.89
  -2  14   0  944.91   56.69
   2  14   0  994.30   56.29
  -2  14   0  973.00   56.69
  -3 -14   0  113.99    7.80
   3 -14   0  117.99    8.60
   3 -14   0  112.49    8.60
  -3 -14   0  114.19    8.90
   3 -14   0  119.79    9.10
   3 -14   0   98.99    8.40
  -3 -14   0  111.19    7.10
  -3 -14   0  121.29    8.60
  -3 -14   0  113.59    7.40
  -3  14   0   95.39    8.30
  -3  14   0  124.19    9.00
   3  14   0  107.09    8.90
   3  14   0  124.59   10.10
  -3  14   0  115.19    8.90
   3  14   0  107.99    8.80
   3  14   0  108.09    8.60
  -3  14   0  107.49    8.70
  -3  14   0  114.09    8.20
   3  14   0  114.09    8.20
   3  14   0  114.79    8.40
   4 -14   0   39.20    4.70
   4 -14   0   46.80    6.00
  -4 -14   0   43.50    3.80
   4 -14   0   39.80    4.70
  -4 -14   0   39.10    4.90
  -4 -14   0   45.50    4.50
  -4 -14   0   38.70    2.90
  -4  14   0   48.00    5.90
  -4  14   0   40.50    4.60
   4  14   0   42.50    4.10
  -4  14   0   45.70    4.80
  -4  14   0   38.00    4.40
   4  14   0   37.20    5.40
  -4  14   0   37.60    4.10
   4  14   0   40.90    4.50
   4  14   0   42.70    6.90
   4  14   0   33.10    4.70
  -5 -14   0  238.18   15.90
   5 -14   0  240.88   16.50
   5 -14   0  232.08   17.30
   5 -14   0  230.28   17.00
  -5 -14   0  236.98   16.10
  -5 -14   0  255.47   15.10
   5 -14   0  240.08   16.30
  -5  14   0  257.37   15.80
  -5  14   0  268.77   15.80
  -5  14   0  240.68   16.30
   5  14   0  253.87   16.70
  -5  14   0  237.78   16.20
   5  14   0  259.97   15.40
   5  14   0  247.68   17.90
  -5  14   0  264.17   16.20
   5  14   0  237.98   16.80
  -6 -14   0  286.47   16.30
   6 -14   0  256.57   17.70
  -6 -14   0  271.27   17.40
   6 -14   0  257.37   18.50
   6 -14   0  283.37   18.30
  -6 -14   0  267.77   17.20
   6 -14   0  267.37   17.90
   6  14   0  302.47   20.20
   6  14   0  248.98   18.30
  -6  14   0  249.48   17.40
  -6  14   0  266.37   17.70
  -6  14   0  267.57   17.70
   6  14   0  286.47   18.30
  -6  14   0  283.97   16.50
   7 -14   0  771.62   45.20
  -7 -14   0  773.32   43.60
  -7 -14   0  730.23   43.30
   7 -14   0  701.73   44.10
   7 -14   0  719.43   44.60
   7  14   0  784.12   45.10
  -7  14   0  740.63   44.20
  -7  14   0  746.83   44.00
  -7  14   0  730.73   44.00
  -7  14   0  724.93   43.90
   8 -14   0    0.30    2.70
   8 -14   0    3.10    2.40
  -8 -14   0   -1.00    1.60
  -8 -14   0    1.50    1.30
   8 -14   0   -0.30    1.90
  -8  14   0    0.70    2.00
  -8  14   0    2.50    2.20
   8  14   0   -0.60    2.70
  -8  14   0    1.90    1.50
  -8  14   0   -0.70    1.80
   8  14   0   -1.00    2.20
  -9 -14   0   70.79    5.80
   9 -14   0   85.49    8.50
   9 -14   0   71.89    7.10
  -9 -14   0   72.69    6.50
   9 -14   0   79.09    7.80
   9  14   0   73.59    8.60
  -9  14   0   74.79    7.00
  -9  14   0   68.59    6.60
   9  14   0   68.49    7.40
  -9  14   0   67.69    6.10
  10 -14   0   58.59    7.90
  10 -14   0   55.79    6.40
  10 -14   0   59.49    7.80
  10  14   0   55.99    7.30
 -10  14   0   51.49    4.80
  10  14   0   48.80    7.40
 -10  14   0   50.09    5.60
  11 -14   0  103.59    9.80
  11 -14   0   89.49    8.50
  11 -14   0   84.79    9.00
  11  14   0   86.89   10.10
  11  14   0   77.99    8.50
  12 -14   0  132.59   12.60
  12 -14   0  137.09   12.60
  12 -14   0  155.08   12.20
  12  14   0  153.68   14.00
  12  14   0  166.78   12.90
  13 -14   0   87.29    9.60
  13 -14   0   80.49    9.30
  13 -14   0   81.79    8.50
  13  14   0   82.79   11.40
  13  14   0   96.29    9.60
  14 -14   0   11.20    3.70
  14 -14   0    9.60    3.80
  14 -14   0   13.10    4.40
  14  14   0   16.10    4.60
  14  14   0   10.50    5.10
  15 -14   0   26.10    6.10
  15 -14   0   28.80    5.40
  15 -14   0   41.70    7.30
  15  14   0   32.20    7.10
  16 -14   0  135.49   12.80
  16 -14   0  123.19   12.40
  16 -14   0  123.89   11.10
  16  14   0  116.49   11.50
  16  14   0  126.89   14.50
   0 -15   0    1.30    1.60
   0 -15   0    3.90    2.30
   0 -15   0    2.20    1.80
   0 -15   0    2.40    1.60
   0  15   0    2.20    2.10
   0  15   0    3.40    2.20
   0  15   0    1.20    1.90
   0  15   0    1.70    1.60
   0  15   0    1.80    1.40
   0  15   0    2.90    2.40
  -1 -15   0    2.10    1.40
  -1 -15   0    2.20    2.10
  -1 -15   0    0.70    1.60
   1 -15   0    1.70    1.60
  -1 -15   0    0.10    1.30
   1 -15   0    2.90    1.70
   1 -15   0    1.50    2.50
   1 -15   0   -0.70    1.40
  -1  15   0   -0.70    1.90
  -1  15   0   -0.10    2.20
   1  15   0    1.60    1.90
   1  15   0   -3.40    1.90
  -1  15   0   -0.10    1.90
   1  15   0    2.00    2.30
  -1  15   0    0.10    1.70
  -1  15   0    0.00    1.40
   1  15   0    0.90    1.50
  -1  15   0   -0.20    1.70
  -2 -15   0   66.09    6.50
   2 -15   0   47.60    7.40
  -2 -15   0   70.19    6.00
  -2 -15   0   72.49    5.20
   2 -15   0   59.49    5.80
  -2 -15   0   63.19    5.30
   2 -15   0   70.89    6.10
   2  15   0   55.99    6.30
  -2  15   0   63.09    6.20
   2  15   0   64.29    5.80
   2  15   0   73.09    7.30
  -2  15   0   74.09    7.00
  -2  15   0   65.29    5.80
  -2  15   0   59.69    6.80
  -2  15   0   65.29    6.20
   2  15   0   71.69    7.30
   3 -15   0  107.69    8.00
   3 -15   0   97.39    7.90
  -3 -15   0  102.59    6.70
  -3 -15   0  102.59    6.50
  -3 -15   0  101.39    7.20
   3 -15   0   81.19    8.40
  -3 -15   0   87.39    8.00
  -3 -15   0   97.29    7.90
   3 -15   0  104.39    9.00
  -3  15   0   99.19    8.10
  -3  15   0   99.99    8.20
  -3  15   0   92.19    7.40
   3  15   0  100.39    7.60
   3  15   0  100.19    9.20
  -3  15   0   96.39    8.00
   3  15   0   87.99    8.20
   4 -15   0   30.40    4.60
  -4 -15   0   23.60    4.10
  -4 -15   0   26.40    4.00
   4 -15   0   36.50    4.80
  -4 -15   0   21.50    3.10
   4 -15   0   14.40    3.90
  -4 -15   0   22.60    2.10
   4 -15   0   25.20    4.30
   4  15   0   26.80    5.40
  -4  15   0   23.70    3.70
  -4  15   0   27.40    4.00
  -4  15   0   23.20    4.30
   4  15   0   21.80    3.90
  -4  15   0   31.40    3.50
   4  15   0   19.10    3.70
  -4  15   0   28.90    4.40
   4  15   0   29.40    3.60
   5 -15   0   63.99    6.60
  -5 -15   0   68.09    6.00
   5 -15   0   85.49    7.00
  -5 -15   0   75.89    6.60
   5 -15   0   66.29    7.30
   5 -15   0   67.79    6.60
  -5 -15   0   73.49    5.40
  -5  15   0   70.19    6.40
   5  15   0   63.19    7.10
   5  15   0   82.79    8.70
   5  15   0   68.19    8.20
  -5  15   0   73.69    6.50
  -5  15   0   66.39    5.90
  -5  15   0   63.49    6.90
  -5  15   0   63.99    5.90
   5  15   0   71.19    5.70
  -6 -15   0  860.81   52.69
  -6 -15   0  943.01   51.59
   6 -15   0  826.12   53.89
   6 -15   0  899.01   53.59
   6 -15   0  868.21   53.39
  -6 -15   0  892.71   52.49
   6 -15   0  852.91   53.09
  -6  15   0  903.81   52.89
   6  15   0  942.91   53.89
  -6  15   0  868.11   52.49
  -6  15   0  883.11   53.09
   6  15   0  959.20   55.39
   6  15   0  941.31   51.89
   6  15   0  960.60   53.59
  -6  15   0  937.71   51.89
   7 -15   0  189.08   14.70
  -7 -15   0  198.98   14.10
   7 -15   0  231.78   16.00
  -7 -15   0  214.98   14.00
   7 -15   0  200.68   15.00
   7  15   0  248.48   15.60
  -7  15   0  222.98   14.60
  -7  15   0  217.28   14.80
   7  15   0  208.88   17.10
  -7  15   0  204.78   13.90
   7  15   0  205.78   15.60
  -8 -15   0   17.40    3.30
   8 -15   0   17.90    4.20
  -8 -15   0   25.20    3.00
   8 -15   0   13.30    3.60
   8 -15   0   19.70    4.40
  -8  15   0   23.90    3.40
  -8  15   0   23.30    4.30
  -8  15   0   19.70    3.80
   8  15   0   25.80    6.60
   8  15   0   20.30    4.30
   8  15   0   18.90    5.00
   9 -15   0   14.50    3.80
   9 -15   0   15.00    4.50
  -9 -15   0   16.70    2.90
  -9 -15   0   20.80    2.80
   9 -15   0   22.50    4.80
   9  15   0   14.90    4.90
  -9  15   0   21.90    4.00
   9  15   0   13.40    3.60
  -9  15   0   22.90    3.50
  -9  15   0   16.80    3.70
  10 -15   0   75.79    7.30
  10 -15   0   64.69    7.80
  10 -15   0   58.99    7.70
  10  15   0   63.79    8.60
 -10  15   0   60.19    5.70
  10  15   0   58.19    7.50
 -10  15   0   52.89    6.20
  11 -15   0   14.30    3.90
  11 -15   0   12.80    4.60
  11 -15   0   15.20    3.90
  11  15   0   16.10    4.50
  11  15   0   16.60    5.10
 -11  15   0   15.00    3.70
  12 -15   0  101.79    9.50
  12 -15   0   98.89   10.20
  12 -15   0   88.79   10.30
  12  15   0  106.59   10.10
  12  15   0  108.09   11.40
  13 -15   0    2.40    3.00
  13 -15   0    1.20    2.60
  13  15   0   -1.80    3.70
  13  15   0    5.00    3.70
  14 -15   0   29.40    5.70
  14 -15   0   24.90    5.40
  14 -15   0   28.10    5.90
  14  15   0   24.50    6.50
  14  15   0   30.50    5.90
  15 -15   0   33.80    6.00
  15 -15   0   24.10    5.40
  15 -15   0   28.50    6.10
  15  15   0   29.90    5.70
  15  15   0   25.40    7.20
  16 -15   0   28.90    6.40
  16 -15   0   33.50    6.00
  16  15   0   22.20    5.20
  16  15   0   23.40    8.60
   0 -16   0   48.70    5.10
   0 -16   0   65.99    6.50
   0 -16   0   57.99    5.10
   0  16   0   55.59    6.20
   0  16   0   52.39    5.50
   0  16   0   52.59    5.80
  -1 -16   0 1021.00   63.79
  -1 -16   0 1183.18   63.69
   1 -16   0 1235.98   64.29
  -1 -16   0 1239.18   65.49
   1 -16   0 1007.40   64.89
  -1 -16   0 1103.19   64.59
   1 -16   0 1139.19   65.49
   1 -16   0 1190.58   65.49
   1  16   0  955.50   64.59
  -1  16   0 1094.49   64.59
   1  16   0 1083.99   65.39
   1  16   0 1111.79   64.59
  -1  16   0 1092.19   64.89
   1  16   0 1133.09   64.49
  -1  16   0 1095.39   64.99
   2 -16   0   -1.00    1.70
   2 -16   0    1.50    2.10
   2 -16   0    2.00    1.90
  -2 -16   0    2.00    2.20
  -2 -16   0    0.40    1.30
  -2 -16   0    0.30    1.20
   2 -16   0    1.00    2.20
  -2 -16   0   -1.60    1.90
  -2  16   0   -0.60    1.70
   2  16   0   -0.20    2.10
   2  16   0   -1.00    2.60
  -2  16   0    4.10    2.40
   2  16   0    1.10    2.00
  -3 -16   0 1208.08   67.49
   3 -16   0 1216.78   68.39
  -3 -16   0 1169.68   66.79
  -3 -16   0 1179.78   68.29
   3 -16   0 1277.47   68.49
  -3 -16   0 1134.49   66.59
   3 -16   0 1204.78   69.09
   3 -16   0 1075.89   68.99
  -3 -16   0 1129.29   68.49
  -3  16   0 1258.27   68.79
  -3  16   0 1130.69   68.29
   3  16   0 1084.99   68.59
   3  16   0 1159.88   69.69
   3  16   0 1243.08   68.09
   3  16   0 1206.88   68.69
  -4 -16   0   60.89    6.40
   4 -16   0   68.79    6.60
  -4 -16   0   64.29    4.50
   4 -16   0   74.79    8.00
   4 -16   0   63.29    6.30
  -4 -16   0   60.59    5.80
  -4 -16   0   74.89    5.60
   4 -16   0   42.10    6.40
  -4  16   0   56.59    5.90
   4  16   0   69.29    6.90
  -4  16   0   72.99    6.90
   4  16   0   61.59    8.30
  -4  16   0   63.79    6.10
   4  16   0   67.79    5.60
   4  16   0   63.19    6.80
   5 -16   0    2.00    2.10
   5 -16   0    0.10    2.20
  -5 -16   0    0.80    2.10
   5 -16   0   -1.20    1.50
  -5 -16   0    0.10    1.30
   5 -16   0    1.10    2.00
  -5 -16   0    0.30    1.50
   5  16   0    1.60    2.40
  -5  16   0   -1.00    1.90
  -5  16   0   -0.10    1.30
   5  16   0   -2.00    2.50
   5  16   0    2.00    2.80
   5  16   0    0.90    1.40
  -5  16   0   -0.50    1.50
  -6 -16   0   44.80    4.60
  -6 -16   0   47.00    3.90
   6 -16   0   42.70    5.80
   6 -16   0   29.80    5.40
  -6 -16   0   41.50    5.00
   6 -16   0   40.80    5.70
  -6  16   0   43.40    5.10
  -6  16   0   43.00    5.20
   6  16   0   41.50    5.90
  -6  16   0   40.20    4.10
   6  16   0   43.00    6.90
   6  16   0   45.80    4.20
   6  16   0   48.60    6.50
   7 -16   0   50.89    6.90
   7 -16   0   51.49    6.00
  -7 -16   0   49.10    5.90
   7 -16   0   44.00    6.90
  -7 -16   0   51.59    5.10
   7  16   0   56.99    8.80
   7  16   0   61.69    6.70
  -7  16   0   56.99    5.90
   7  16   0   48.80    7.00
  -7  16   0   62.29    6.00
   8 -16   0   40.20    5.80
  -8 -16   0   39.50    4.10
   8 -16   0   47.80    7.00
  -8 -16   0   39.60    5.80
   8 -16   0   29.90    5.30
   8  16   0   50.09    6.40
   8  16   0   41.80    7.70
   8  16   0   41.60    6.70
  -8  16   0   42.30    5.20
  -8  16   0   42.10    5.20
  -8  16   0   40.50    5.50
  -9 -16   0    2.90    1.70
  -9 -16   0    3.60    1.90
   9 -16   0    3.90    2.70
   9 -16   0   10.10    3.60
   9 -16   0    7.70    3.70
  -9  16   0    2.90    2.50
  -9  16   0    3.90    2.20
   9  16   0    3.50    2.80
  -9  16   0    2.20    2.60
   9  16   0    3.10    3.50
   9  16   0    3.00    3.50
  10 -16   0   31.20    5.50
  10 -16   0   30.00    4.80
  10 -16   0   35.50    6.30
  10  16   0   28.50    6.10
  10  16   0   17.60    6.00
 -10  16   0   23.00    3.80
  10  16   0   24.90    5.20
  11 -16   0    1.40    2.50
  11 -16   0    8.30    3.80
  11 -16   0    3.40    3.30
 -11  16   0   -4.30    2.20
  11  16   0    4.20    4.00
  11  16   0    1.40    2.90
  12 -16   0  248.48   18.10
  12 -16   0  246.18   18.60
  12 -16   0  240.68   18.90
  12  16   0  250.97   19.50
  12  16   0  242.08   18.10
  13 -16   0  303.27   20.70
  13 -16   0  296.17   21.40
  13 -16   0  268.07   21.30
  13  16   0  305.07   22.30
  13  16   0  272.17   20.50
  14 -16   0    0.70    2.80
  14 -16   0    4.00    3.00
  14 -16   0    2.80    3.90
  14  16   0   -0.10    4.20
  15 -16   0   42.40    7.70
  15 -16   0   36.10    6.20
  15 -16   0   36.10    7.30
  15  16   0   46.50    7.40
  15  16   0   39.10    8.30
  16 -16   0   38.60    7.50
  16 -16   0   47.40    8.10
  16 -16   0   46.30    7.10
  16  16   0   46.10    9.20
  16  16   0   25.10    6.60
   0 -17   0   10.80    2.50
   0 -17   0   10.60    3.10
   0  17   0    6.90    2.80
   0  17   0    7.20    2.80
   0  17   0    7.80    3.40
   1 -17   0   77.59    6.80
  -1 -17   0   71.79    6.50
  -1 -17   0   86.89    8.00
   1 -17   0   78.49    7.90
  -1 -17   0   84.59    6.30
   1 -17   0   81.09    6.80
   1  17   0   69.09    7.40
  -1  17   0   85.29    7.50
   1  17   0   78.09    7.40
   1  17   0   86.99    7.20
  -1  17   0   87.99    7.80
  -1  17   0   69.39    7.40
   1  17   0   83.99    8.20
   2 -17   0  114.69    9.20
   2 -17   0  133.09   10.50
  -2 -17   0  110.19    9.60
  -2 -17   0  121.19    8.10
   2 -17   0  121.29    9.90
   2 -17   0  126.39    9.10
  -2 -17   0  112.59    8.60
  -2  17   0  112.79    9.50
  -2  17   0  112.99    9.40
   2  17   0  136.09    9.40
   2  17   0   97.09    9.50
   2  17   0  114.39   10.40
   2  17   0  119.49    9.70
  -3 -17   0   38.50    5.00
  -3 -17   0   39.10    5.70
  -3 -17   0   29.00    4.00
   3 -17   0   39.60    5.20
  -3 -17   0   33.30    3.20
   3 -17   0   39.60    5.40
   3 -17   0   33.20    5.30
   3  17   0   30.80    5.70
  -3  17   0   30.30    4.80
   3  17   0   21.50    4.20
  -3  17   0   33.60    4.90
   4 -17   0   38.40    6.10
   4 -17   0   48.90    5.70
  -4 -17   0   48.80    4.70
   4 -17   0   56.79    6.00
  -4 -17   0   57.99    6.10
  -4 -17   0   54.39    5.50
  -4  17   0   59.19    6.40
   4  17   0   60.79    7.50
   4  17   0   59.19    6.60
   4  17   0   61.69    8.50
   4  17   0   48.70    5.00
  -4  17   0   48.90    5.40
   5 -17   0    4.40    2.60
   5 -17   0    5.90    2.80
   5 -17   0   11.80    3.20
  -5 -17   0    4.70    1.80
  -5 -17   0    5.20    2.50
  -5 -17   0    5.40    1.90
  -5  17   0    2.70    2.10
  -5  17   0    4.80    2.30
   5  17   0    2.70    2.80
   5  17   0    2.50    3.00
   5  17   0    6.10    3.40
   5  17   0    7.20    2.20
  -5  17   0    5.00    2.50
   6 -17   0   15.80    4.60
  -6 -17   0   34.10    3.50
   6 -17   0   24.40    4.30
  -6 -17   0   37.00    5.10
   6 -17   0   34.30    5.50
   6  17   0   31.40    3.70
  -6  17   0   35.40    5.00
  -6  17   0   32.80    5.00
   6  17   0   35.70    5.50
  -6  17   0   36.90    3.90
   6  17   0   28.50    5.10
   6  17   0   23.10    5.10
   7 -17   0  524.65   32.90
   7 -17   0  483.85   33.60
  -7 -17   0  484.95   32.00
  -7 -17   0  549.65   32.00
   7 -17   0  526.55   33.20
   7  17   0  560.34   33.80
  -7  17   0  522.55   32.50
   7  17   0  608.84   33.70
  -7  17   0  546.45   32.70
   7  17   0  487.55   34.70
   8 -17   0   35.60    6.00
   8 -17   0   34.20    6.20
   8 -17   0   25.70    4.60
  -8 -17   0   34.50    4.20
  -8 -17   0   41.20    4.80
   8  17   0   34.00    6.90
  -8  17   0   32.60    5.20
   8  17   0   33.80    5.60
   8  17   0   35.80    6.00
  -8  17   0   43.90    5.70
   9 -17   0  248.28   18.30
   9 -17   0  246.48   17.70
   9 -17   0  207.58   16.70
  -9  17   0  250.47   16.80
   9  17   0  255.17   19.90
   9  17   0  203.98   16.80
  -9  17   0  254.97   16.90
   9  17   0  253.07   18.40
  10 -17   0   23.30    5.40
  10 -17   0   28.80    5.70
  10 -17   0   12.70    3.90
  10  17   0   15.40    5.90
  10  17   0   22.60    5.60
  10  17   0   19.30    5.00
  11 -17   0    6.70    3.50
  11 -17   0   -1.60    2.30
  11 -17   0   -0.90    2.90
  11  17   0   -1.40    3.60
  11  17   0    2.50    3.80
  11  17   0    3.60    2.80
  12 -17   0    4.50    3.00
  12 -17   0   -0.30    2.80
  12  17   0    0.20    3.70
  12  17   0    0.10    5.20
  12  17   0   -2.90    3.00
  13 -17   0    0.20    2.40
  13 -17   0    3.90    3.30
  13 -17   0   -4.70    2.50
  13  17   0    0.20    4.70
  13  17   0   -2.00    3.60
  13  17   0    1.50    3.40
  14 -17   0   42.70    7.20
  14 -17   0   37.80    7.30
  14 -17   0   52.09    7.70
  14  17   0   39.90    8.10
  14  17   0   46.80   10.20
  14  17   0   32.40    6.40
  15 -17   0   24.40    6.10
  15 -17   0   35.30    7.00
  15 -17   0   44.90    6.60
  15  17   0   38.10    8.60
  15  17   0   19.90    8.70
  15  17   0   24.30    5.80
   0 -18   0 1047.20   62.59
   0 -18   0 1151.48   62.39
   0 -18   0 1128.99   64.09
   0  18   0 1139.79   63.39
   0  18   0 1006.60   63.39
   0  18   0 1004.50   63.59
   1 -18   0   -2.80    2.10
   1 -18   0    2.00    1.80
  -1 -18   0    0.00    2.30
   1 -18   0    1.10    1.70
  -1 -18   0    1.20    1.60
  -1 -18   0    0.80    1.70
   1  18   0    0.20    2.10
  -1  18   0    0.10    2.00
  -1  18   0    0.10    2.20
   1  18   0    0.60    2.60
   1  18   0   -0.10    2.20
  -1  18   0    2.20    2.20
  -2 -18   0   20.60    2.90
   2 -18   0   19.50    3.70
  -2 -18   0   19.40    4.20
   2 -18   0   20.40    3.60
   2 -18   0   21.30    4.80
  -2 -18   0   17.20    3.30
  -2  18   0   16.80    3.40
   2  18   0   17.40    3.60
   2  18   0   13.20    3.70
   2  18   0   17.50    4.80
  -2  18   0   19.70    3.90
   2  18   0   16.20    3.90
  -3 -18   0  224.88   13.80
  -3 -18   0  222.68   16.10
   3 -18   0  231.88   15.80
  -3 -18   0  225.58   14.90
   3 -18   0  244.48   17.00
  -3 -18   0  241.48   14.00
   3  18   0  212.88   16.10
   3  18   0  220.38   17.10
  -3  18   0  244.58   16.30
   3  18   0  222.58   16.00
  -3  18   0  237.38   15.90
   3  18   0  222.88   15.30
  -4 -18   0  393.46   23.80
  -4 -18   0  353.26   22.20
   4 -18   0  393.26   23.60
   4 -18   0  393.76   23.60
   4 -18   0  342.37   24.30
   4  18   0  336.27   23.30
   4  18   0  339.67   24.70
  -4  18   0  350.36   23.00
  -4  18   0  393.26   24.10
   4  18   0  379.66   23.90
  -4  18   0  354.46   23.20
   4  18   0  334.37   23.70
  -5 -18   0   21.70    3.30
   5 -18   0   16.90    4.50
  -5 -18   0   24.00    4.50
  -5 -18   0   21.70    3.60
   5 -18   0   33.50    5.10
   5 -18   0   25.50    4.40
   5  18   0   26.70    3.80
   5  18   0   26.10    5.20
   5  18   0   19.90    4.90
  -5  18   0   30.20    4.40
  -5  18   0   20.30    4.00
   5  18   0   24.00    4.90
  -5  18   0   23.10    4.10
  -6 -18   0   36.80    3.80
  -6 -18   0   33.40    4.60
  -6 -18   0   32.00    4.90
   6 -18   0   39.40    6.00
   6 -18   0   29.80    5.60
   6 -18   0   32.60    5.30
  -6  18   0   39.40    4.20
   6  18   0   40.60    6.20
   6  18   0   26.10    3.90
  -6  18   0   33.80    4.90
  -6  18   0   41.60    5.00
   6  18   0   34.50    6.70
   6  18   0   33.80    5.80
   7 -18   0   44.60    6.10
   7 -18   0   39.20    5.80
  -7 -18   0   35.50    5.20
   7 -18   0   28.20    5.90
  -7  18   0   43.80    3.40
   7  18   0   50.69    6.70
  -7  18   0   46.50    5.60
  -7  18   0   33.30    5.10
   7  18   0   47.50    8.80
   7  18   0   39.10    6.70
   8 -18   0    2.10    3.40
   8 -18   0    1.10    2.60
  -8 -18   0    2.30    2.30
  -8 -18   0    2.40    1.70
   8 -18   0    3.30    2.70
   8  18   0   -3.00    3.20
  -8  18   0    2.20    2.00
   8  18   0    3.30    3.70
  -8  18   0   -1.40    2.00
   8  18   0    1.10    2.80
   9 -18   0    1.20    2.50
   9 -18   0   -0.30    2.40
   9 -18   0    2.70    3.20
  -9 -18   0   -0.70    1.50
  -9 -18   0    0.80    1.60
  -9  18   0    7.00    3.00
   9  18   0   -0.50    4.10
  -9  18   0    3.40    2.30
   9  18   0    1.90    3.00
   9  18   0   -2.70    3.30
  10 -18   0   90.39    9.00
  10 -18   0   82.89   10.70
  10 -18   0   74.59    8.30
  10  18   0   50.49    9.60
  10  18   0   67.29    8.10
  10  18   0   76.59   10.90
  11 -18   0  192.08   17.30
  11 -18   0  182.38   15.20
  11 -18   0  204.88   16.10
  11  18   0  207.68   17.00
  11  18   0  206.18   15.60
  11  18   0  196.68   18.40
  12 -18   0   12.40    4.60
  12 -18   0    8.20    4.10
  12 -18   0    7.00    3.60
  12  18   0   13.00    4.20
  12  18   0   10.70    4.90
  12  18   0    3.20    4.40
  13 -18   0  121.19   12.10
  13 -18   0  132.99   11.50
  13 -18   0  102.19   11.90
  13  18   0  124.99   16.80
  13  18   0  121.49   13.30
  13  18   0  109.89   11.10
  14 -18   0   16.20    5.10
  14 -18   0   16.70    5.10
  14 -18   0   12.80    4.70
  14  18   0   14.80    4.60
  14  18   0   15.20    5.50
  14  18   0    7.70    6.30
  15 -18   0   26.20    5.40
  15 -18   0   18.70    4.70
  15 -18   0   20.70    5.60
  15  18   0   15.50    5.00
  15  18   0   20.00    8.30
  15  18   0   29.30    7.50
   0 -19   0    8.80    2.40
   0 -19   0    8.10    2.50
   0 -19   0    6.60    3.20
   0  19   0   10.30    3.50
   0  19   0    7.40    3.10
   0  19   0    6.50    2.90
   1 -19   0  281.17   20.40
  -1 -19   0  329.37   19.80
  -1 -19   0  322.27   20.50
   1 -19   0  345.87   22.20
   1 -19   0  319.17   20.30
  -1 -19   0  321.47   21.70
   1  19   0  273.17   21.20
   1  19   0  342.47   22.20
  -1  19   0  313.87   21.30
  -1  19   0  356.56   21.50
   1  19   0  343.67   21.40
  -2 -19   0  344.77   22.20
   2 -19   0  392.86   24.50
  -2 -19   0  380.26   21.50
   2 -19   0  356.26   22.60
  -2 -19   0  322.17   23.20
   2 -19   0  327.07   22.60
  -2  19   0  375.06   23.40
   2  19   0  371.76   23.40
   2  19   0  323.57   23.40
   2  19   0  354.46   24.30
  -2  19   0  381.56   23.50
   3 -19   0   62.09    6.60
  -3 -19   0   62.39    6.20
   3 -19   0   69.29    8.00
  -3 -19   0   72.29    5.20
  -3 -19   0   75.29    5.00
   3 -19   0   70.09    6.80
  -3 -19   0   70.19    7.30
   3  19   0   65.39    7.60
  -3  19   0   70.69    7.30
   3  19   0   79.19    8.50
   3  19   0   65.09    7.50
  -3  19   0   67.69    7.30
  -4 -19   0   10.30    2.50
   4 -19   0    8.90    3.80
   4 -19   0    8.40    3.20
  -4 -19   0   12.40    3.50
   4 -19   0   12.80    3.40
  -4  19   0   15.50    3.60
   4  19   0   10.50    3.60
   4  19   0   10.50    3.70
  -4  19   0   18.20    3.90
  -4  19   0   12.80    3.70
   4  19   0   12.10    3.00
   4  19   0   12.20    4.40
  -4  19   0   16.20    4.30
   5 -19   0    0.80    2.50
  -5 -19   0    3.60    2.60
  -5 -19   0    0.00    1.60
   5 -19   0    0.00    2.60
   5 -19   0    1.90    2.30
   5  19   0   -2.30    2.60
   5  19   0    2.80    3.20
  -5  19   0    1.00    1.80
   5  19   0    2.00    2.80
  -5  19   0   -0.40    2.10
  -5  19   0   -2.60    1.50
   6 -19   0  143.49   13.60
  -6 -19   0  160.48   12.50
  -6 -19   0  169.68   11.30
   6 -19   0  168.48   13.10
   6 -19   0  188.18   13.30
  -6 -19   0  172.68   12.90
  -6  19   0  169.08   11.60
   6  19   0  185.18   13.90
   6  19   0  166.68   11.60
  -6  19   0  159.58   12.40
  -6  19   0  158.08   12.40
   6  19   0  184.78   13.60
   6  19   0  161.58   14.70
  -7 -19   0  586.74   36.50
  -7 -19   0  568.14   36.10
   7 -19   0  515.65   38.00
   7 -19   0  662.13   37.80
   7 -19   0  632.34   37.50
   7  19   0  553.04   39.10
   7  19   0  616.34   37.70
   7  19   0  624.54   38.10
  -7  19   0  608.84   36.80
  -7  19   0  630.24   36.90
   8 -19   0   46.80    6.80
  -8 -19   0   59.49    6.20
  -8 -19   0   47.10    5.90
   8 -19   0   63.79    7.30
   8 -19   0   55.09    8.30
   8  19   0   57.79    8.20
   8  19   0   61.19    7.80
  -8  19   0   52.89    6.40
  -8  19   0   68.19    6.60
   8  19   0   50.69    9.70
  -9 -19   0   74.59    6.80
   9 -19   0   76.59   10.40
   9 -19   0   67.79    8.30
   9 -19   0   86.09    9.00
  -9  19   0   82.69    8.20
  -9  19   0   78.79    7.70
   9  19   0   93.09    9.80
   9  19   0   71.09   10.20
   9  19   0   89.29    9.10
  10 -19   0  458.85   33.60
  10 -19   0  617.24   37.20
  10 -19   0  473.15   34.70
  10  19   0  551.94   37.10
  10  19   0  589.64   35.20
  10  19   0  510.95   33.80
  11 -19   0    0.50    2.70
  11 -19   0    3.50    3.00
  11 -19   0    1.20    3.10
  11  19   0    0.90    3.10
  11  19   0    7.80    4.50
  11  19   0    1.10    4.30
  12 -19   0   58.79    8.30
  12 -19   0   71.29   10.30
  12 -19   0   64.89    8.90
  12  19   0   66.99   10.00
  12  19   0   76.69   12.60
  12  19   0   47.50    9.40
  13 -19   0   23.80    5.70
  13 -19   0   32.60    7.00
  13 -19   0   30.10    6.70
  13  19   0   32.20    9.10
  13  19   0   18.00    5.40
  13  19   0   16.90    6.30
  14 -19   0    5.80    3.80
  14 -19   0   11.50    4.40
  14 -19   0   16.40    5.60
  14  19   0    5.80    5.70
  14  19   0   11.30    6.20
  14  19   0    9.40    4.50
   0 -20   0  121.49   11.10
   0 -20   0  136.49   10.20
   0 -20   0  128.59    9.50
   0  20   0  133.89   11.20
   0  20   0  130.19   11.10
   0  20   0  123.59   10.60
  -1 -20   0   24.60    3.40
  -1 -20   0   17.20    4.30
   1 -20   0   20.00    3.60
  -1 -20   0   24.40    3.80
   1 -20   0   23.40    3.90
   1 -20   0   29.40    5.60
   1  20   0   12.60    3.90
   1  20   0   27.40    5.60
  -1  20   0   22.70    4.80
   1  20   0   23.80    4.80
  -1  20   0   15.50    3.70
  -2 -20   0   16.20    4.00
   2 -20   0   13.30    3.90
  -2 -20   0   15.20    2.60
   2 -20   0   12.90    4.20
   2 -20   0   12.40    3.00
  -2 -20   0   11.70    2.90
   2  20   0   14.90    3.80
  -2  20   0   17.00    4.40
  -2  20   0   15.80    3.90
   2  20   0   17.40    4.70
   2  20   0    8.80    3.30
  -3 -20   0   48.00    5.40
   3 -20   0   53.09    6.10
  -3 -20   0   55.79    4.20
   3 -20   0   52.19    7.40
  -3 -20   0   58.19    7.70
  -3 -20   0   56.89    4.30
   3 -20   0   50.49    6.10
  -3  20   0   61.69    6.80
  -3  20   0   55.59    6.40
   3  20   0   37.10    5.90
   3  20   0   62.89    7.10
   3  20   0   65.89    8.70
   4 -20   0  128.29   10.60
  -4 -20   0  151.08   11.40
   4 -20   0  124.19   12.00
   4 -20   0  111.59   10.30
  -4  20   0  141.89   11.60
   4  20   0  120.59   12.10
  -4  20   0  139.59   10.50
  -4  20   0  143.39   11.30
   4  20   0  142.39   11.50
   4  20   0  122.29   11.30
  -4  20   0  139.59   10.80
  -5 -20   0    1.90    1.80
   5 -20   0    0.40    2.40
   5 -20   0    1.10    2.80
  -5 -20   0    5.70    3.10
   5 -20   0    2.90    2.70
   5  20   0    2.50    3.20
   5  20   0    5.10    2.30
   5  20   0    4.50    3.80
   5  20   0    4.00    2.80
  -5  20   0    6.90    3.10
  -5  20   0    1.90    2.40
  -5  20   0    3.90    2.50
  -6 -20   0   60.79    6.70
   6 -20   0   34.00    6.70
   6 -20   0   53.49    6.90
  -6 -20   0   52.39    5.00
   6 -20   0   60.79    7.90
  -6  20   0   54.09    4.60
   6  20   0   46.00    7.80
  -6  20   0   50.19    6.10
   6  20   0   50.69    7.60
   6  20   0   51.99    7.20
   6  20   0   60.89    5.40
  -6  20   0   49.30    6.10
   7 -20   0   38.30    6.40
   7 -20   0   27.40    5.70
  -7 -20   0   37.10    5.50
  -7 -20   0   35.90    5.50
   7 -20   0   36.40    6.40
  -7  20   0   40.10    5.50
   7  20   0   26.20    6.60
   7  20   0   44.70    6.80
  -7  20   0   39.50    6.00
   7  20   0   51.79    7.80
   8 -20   0  160.18   12.50
   8 -20   0  148.49   12.40
  -8 -20   0  144.99   11.00
   8 -20   0  146.89   13.50
  -8 -20   0  114.79   10.50
  -8  20   0  147.59   11.40
   8  20   0  151.98   12.70
  -8  20   0  144.49   11.60
   8  20   0  154.08   13.20
   8  20   0  137.49   14.20
   9 -20   0  332.87   21.80
   9 -20   0  257.77   21.80
  -9 -20   0  283.27   19.10
   9 -20   0  288.87   22.40
   9  20   0  319.97   22.20
   9  20   0  292.97   21.30
  -9  20   0  305.47   20.60
  -9  20   0  318.37   20.50
  10 -20   0  265.27   18.70
  10 -20   0  226.18   19.10
  10 -20   0  228.88   18.00
  10  20   0  239.68   18.20
  10  20   0  229.08   20.70
  10  20   0  274.77   19.70
  11 -20   0   11.40    4.30
  11 -20   0   10.70    4.30
  11 -20   0    9.20    4.10
  11  20   0   16.50    5.20
  11  20   0   21.70    6.30
  12 -20   0  252.47   20.80
  12 -20   0  266.27   19.80
  12 -20   0  263.37   20.00
  12  20   0  267.27   23.30
  12  20   0  246.78   19.60
  12  20   0  296.37   21.50
  13 -20   0   68.89    9.70
  13 -20   0   54.79    9.50
  13 -20   0   82.99    9.30
  13  20   0   78.29   10.40
  13  20   0   94.29   14.40
  13  20   0   75.39    9.10
  14 -20   0   83.29   11.40
  14 -20   0   94.39    9.80
  14 -20   0   75.69   10.30
  14  20   0   81.19   11.50
  14  20   0   52.39   12.00
  14  20   0   72.99   10.00
   0 -21   0    6.70    3.30
   0 -21   0    4.90    2.00
   0 -21   0    3.40    2.10
   0  21   0    5.10    3.30
   0  21   0    4.90    3.00
   0  21   0    3.40    3.20
  -1 -21   0  122.79    9.00
  -1 -21   0  127.89    9.90
   1 -21   0  119.19   10.10
  -1 -21   0  119.59   11.00
   1 -21   0  126.99    9.60
   1 -21   0  121.29   11.30
   1  21   0  134.39   11.50
   1  21   0  117.89   11.00
   1  21   0  139.19   11.10
  -1  21   0  129.99   10.90
  -1  21   0  128.89   10.80
   2 -21   0  115.59   10.40
   2 -21   0  137.29   12.10
   2 -21   0  124.59   10.20
  -2 -21   0  129.39   11.30
  -2 -21   0  139.29    9.10
  -2 -21   0  136.69   10.30
   2  21   0  137.29   12.10
   2  21   0  114.69   11.30
   2  21   0  148.89   11.60
  -2  21   0  143.69   11.40
  -2  21   0  154.98   11.50
  -3 -21   0    9.40    2.60
   3 -21   0   12.10    3.30
  -3 -21   0   10.50    3.90
  -3 -21   0   14.40    2.00
   3 -21   0    8.20    3.30
   3 -21   0    6.90    3.80
   3  21   0    9.20    3.40
  -3  21   0   16.80    3.40
  -3  21   0   11.00    3.40
  -3  21   0   15.60    4.30
   3  21   0   10.40    3.50
   3  21   0   13.30    5.00
   4 -21   0   81.99    9.30
  -4 -21   0   81.19    8.20
   4 -21   0   73.19    7.80
   4 -21   0   79.19    7.80
  -4 -21   0   72.99    6.90
   4  21   0   83.89    8.80
  -4  21   0   80.19    8.40
  -4  21   0   91.79    9.00
  -4  21   0   80.89    8.00
   4  21   0   76.49    8.60
   4  21   0   87.99   10.00
  -4  21   0   77.89    7.50
   5 -21   0   20.20    4.90
   5 -21   0   31.20    5.10
   5 -21   0   18.10    4.90
  -5 -21   0   21.20    4.50
  -5 -21   0   28.80    4.90
   5  21   0   25.60    5.60
  -5  21   0   15.50    3.90
   5  21   0   19.00    4.90
   5  21   0   20.40    5.50
  -5  21   0   27.50    3.50
  -5  21   0   29.70    4.90
  -5  21   0   31.30    5.20
   6 -21   0   18.50    5.30
   6 -21   0   26.40    5.40
   6 -21   0   28.80    5.50
  -6 -21   0   29.70    5.20
  -6  21   0   31.50    5.00
  -6  21   0   27.80    4.80
   6  21   0   22.50    6.20
   6  21   0   25.20    5.60
  -6  21   0   26.20    3.50
   6  21   0   28.50    5.40
   7 -21   0   11.10    4.00
   7 -21   0    3.40    2.90
   7 -21   0   11.30    3.50
  -7 -21   0    8.90    3.20
  -7  21   0    8.70    3.00
   7  21   0    5.80    4.00
   7  21   0   11.30    5.60
  -7  21   0    6.20    2.50
   7  21   0    4.20    3.30
  -8 -21   0   51.39    6.10
   8 -21   0   64.49    8.10
   8 -21   0   48.90    9.00
   8 -21   0   62.19    9.50
  -8  21   0   54.69    7.20
  -8  21   0   57.69    6.40
   8  21   0   58.49    8.20
   8  21   0   67.99   12.00
   8  21   0   56.49    8.90
   9 -21   0   47.30    7.10
   9 -21   0   43.20    7.00
   9 -21   0   35.70    7.10
  -9  21   0   40.20    6.30
  -9  21   0   42.10    6.00
   9  21   0   43.80    8.80
   9  21   0   45.20    7.90
   9  21   0   39.80    6.90
  10 -21   0  249.88   20.60
  10 -21   0  250.07   19.70
  10 -21   0  301.37   20.40
  10  21   0  288.67   20.90
  10  21   0  263.87   22.50
  10  21   0  265.87   25.20
  11 -21   0   29.70    6.50
  11 -21   0   34.70    7.20
  11 -21   0   40.20    6.70
  11  21   0   34.60    9.00
  11  21   0   51.59    8.30
  11  21   0   43.00    7.00
  12 -21   0   69.59   10.80
  12 -21   0   75.39    9.20
  12 -21   0   75.49    9.30
  12  21   0   71.39    9.60
  12  21   0   80.39   12.00
  12  21   0   75.99   11.00
  13 -21   0   37.50    8.10
  13 -21   0   28.80    6.50
  13 -21   0   36.10    7.00
  13  21   0   49.10   10.30
  13  21   0   36.00    7.40
  13  21   0   23.40    5.90
   0 -22   0  125.19    9.30
   0 -22   0  107.49   10.90
   0 -22   0  129.09   10.30
   0  22   0  134.39   11.10
   0  22   0  119.99   11.30
   0  22   0  139.19   11.70
   1 -22   0  118.29    9.30
   1 -22   0  121.39   11.30
  -1 -22   0  115.79   10.90
   1 -22   0  118.49   10.00
  -1 -22   0  131.89    9.90
  -1 -22   0  117.09    8.50
   1  22   0  109.99   10.90
  -1  22   0  110.89   10.30
  -1  22   0  112.09   10.50
   1  22   0  121.79   11.40
   1  22   0  127.79   10.80
  -2 -22   0   39.30    5.40
  -2 -22   0   45.40    6.90
   2 -22   0   44.10    7.50
   2 -22   0   31.20    4.90
   2 -22   0   39.50    5.90
  -2  22   0   36.60    6.30
   2  22   0   26.10    5.40
  -2  22   0   52.19    7.00
   2  22   0   44.20    6.90
   2  22   0   30.10    6.00
   3 -22   0   43.10    6.50
   3 -22   0   50.49    5.90
  -3 -22   0   42.50    5.70
  -3 -22   0   49.50    7.00
   3 -22   0   51.99    7.60
   3  22   0   39.10    7.30
  -3  22   0   42.40    6.10
   3  22   0   35.30    5.90
   3  22   0   28.60    5.60
  -3  22   0   41.60    6.80
  -3  22   0   50.19    6.70
   4 -22   0   20.90    4.20
  -4 -22   0   19.70    4.70
  -4 -22   0   15.20    3.50
   4 -22   0   19.70    5.00
   4 -22   0   25.30    5.20
   4  22   0   19.90    4.90
  -4  22   0   14.00    4.30
  -4  22   0   17.20    4.30
  -4  22   0   12.80    3.30
   4  22   0   14.20    4.30
   4  22   0   11.80    4.10
   5 -22   0  243.78   16.80
   5 -22   0  208.58   16.70
   5 -22   0  217.48   18.10
  -5 -22   0  244.68   17.00
  -5 -22   0  236.88   15.50
  -5  22   0  219.68   16.40
   5  22   0  225.68   17.50
   5  22   0  250.07   17.70
  -5  22   0  247.18   16.50
  -5  22   0  221.18   15.00
   5  22   0  244.08   19.10
   6 -22   0    6.20    4.20
   6 -22   0    5.60    3.30
  -6 -22   0    3.00    2.60
  -6 -22   0    0.80    1.20
   6 -22   0    7.60    3.30
  -6  22   0    4.70    2.30
   6  22   0   -0.40    2.80
   6  22   0   11.00    5.30
   6  22   0   -0.90    3.20
  -6  22   0    7.60    2.80
  -6  22   0    0.80    1.30
  -7 -22   0   49.90    6.60
   7 -22   0   39.30    6.90
   7 -22   0   38.50    6.70
   7  22   0   51.89    9.50
  -7  22   0   45.10    6.80
   7  22   0   49.60    7.60
   7  22   0   41.60    7.30
  -7  22   0   35.80    5.60
  -8 -22   0    7.20    2.90
   8 -22   0    3.70    3.30
   8 -22   0    8.50    4.60
   8 -22   0    5.80    3.20
  -8  22   0    3.10    2.70
  -8  22   0    4.60    2.80
   8  22   0   11.90    6.00
   8  22   0    5.60    4.40
   8  22   0    8.80    4.50
   9 -22   0  117.29   11.00
   9 -22   0  110.29   10.80
   9 -22   0  106.89   11.60
   9  22   0  103.79   10.90
  -9  22   0  119.79    9.80
   9  22   0  108.59   13.50
  -9  22   0  112.29   10.10
   9  22   0  110.39   11.70
  10 -22   0   96.79   11.20
  10 -22   0  100.89    9.90
  10 -22   0   87.79   10.00
  10  22   0   88.49   13.10
  10  22   0   97.09   11.20
  10  22   0   96.39   10.20
  11 -22   0    5.40    4.10
  11 -22   0    3.60    3.30
  11 -22   0    5.10    3.80
  11  22   0    2.10    5.30
  11  22   0   -0.30    4.30
  11  22   0    4.00    3.40
  12 -22   0    2.00    3.80
  12 -22   0   13.80    5.10
  12 -22   0   15.50    5.50
  12  22   0    5.10    3.80
  12  22   0    8.50    5.00
  12  22   0    3.10    5.60
  13 -22   0   82.19   13.40
  13 -22   0   76.79   11.10
  13  22   0   60.49   10.40
  13  22   0   75.09   12.90
  13  22   0   75.19   10.10
   0 -23   0    2.60    2.80
   0 -23   0    1.70    2.70
   0 -23   0    1.30    1.80
   0  23   0    6.40    3.30
   0  23   0    2.90    3.30
   1 -23   0  139.39   11.30
  -1 -23   0  157.38   11.30
   1 -23   0  117.69   12.00
   1 -23   0  122.99   10.10
  -1 -23   0  118.19   11.80
  -1  23   0  156.18   12.30
   1  23   0  135.89   12.40
   1  23   0  170.18   12.50
   1  23   0  129.79   12.20
  -1  23   0  147.59   12.20
   2 -23   0    9.60    3.00
   2 -23   0   13.40    3.80
  -2 -23   0   11.40    4.10
  -2 -23   0   13.50    3.40
   2 -23   0   17.50    5.30
   2  23   0   18.40    5.10
  -2  23   0   10.70    3.70
  -2  23   0   14.00    3.90
   2  23   0   10.20    4.30
   2  23   0   11.30    4.20
  -3 -23   0  196.08   14.20
   3 -23   0  217.48   16.80
  -3 -23   0  194.98   15.40
   3 -23   0  191.38   15.00
   3 -23   0  210.18   14.50
   3  23   0  204.38   16.70
   3  23   0  173.48   15.40
  -3  23   0  201.68   15.10
  -3  23   0  204.98   14.70
  -3  23   0  205.98   15.70
   3  23   0  211.38   15.80
   4 -23   0   71.59    7.50
   4 -23   0   90.39   11.70
   4 -23   0   67.09    8.00
  -4 -23   0   81.89    8.40
  -4 -23   0   73.39    7.00
   4  23   0   79.29   10.60
   4  23   0   74.59    9.60
   4  23   0   63.09    8.80
  -4  23   0   79.29    8.50
  -4  23   0   72.79    7.40
  -4  23   0   79.19    7.80
   5 -23   0   18.30    4.00
   5 -23   0   20.00    5.80
   5 -23   0   13.20    4.30
  -5 -23   0   19.30    3.70
  -5 -23   0   18.90    4.60
   5  23   0   16.10    5.30
   5  23   0   15.60    5.30
  -5  23   0   16.20    3.80
  -5  23   0   18.70    4.50
   5  23   0   15.30    4.80
   6 -23   0    3.30    2.90
  -6 -23   0   -0.70    1.30
   6 -23   0    4.30    3.40
   6 -23   0    8.30    4.40
  -6 -23   0    8.70    3.50
   6  23   0    4.50    4.10
  -6  23   0    1.50    2.90
  -6  23   0    3.80    2.30
  -6  23   0    1.10    1.60
   6  23   0    1.40    3.40
   6  23   0    6.70    4.90
   7 -23   0   -3.40    2.20
   7 -23   0    3.00    2.70
  -7 -23   0   -1.00    2.10
   7 -23   0   -0.70    3.40
  -7  23   0    0.90    2.10
   7  23   0   -2.80    3.60
   7  23   0    0.40    4.00
  -7  23   0    1.30    2.30
   8 -23   0    2.90    3.20
   8 -23   0    3.20    3.10
   8 -23   0    6.10    3.90
  -8 -23   0    2.60    2.50
   8  23   0    6.90    4.10
   8  23   0    6.50    4.90
   8  23   0    3.00    3.80
  -8  23   0    4.40    2.20
  -8  23   0    3.00    2.50
   9 -23   0   93.89   11.60
   9 -23   0   61.99    9.70
   9 -23   0   83.49    8.90
   9  23   0   93.79   11.20
  -9  23   0   62.79    7.40
   9  23   0   76.49   12.40
  -9  23   0   72.49    7.90
   9  23   0   88.49    9.70
  10 -23   0    7.10    4.70
  10 -23   0    5.60    3.80
  10 -23   0   11.70    3.70
  10  23   0    5.20    5.80
  10  23   0   13.30    4.80
  10  23   0    3.10    4.60
  11 -23   0   40.60    8.70
  11 -23   0   39.70    7.00
  11 -23   0   40.90    7.60
  11  23   0   41.30    7.90
  11  23   0   37.50    6.90
  11  23   0   40.00    9.70
  12 -23   0    2.40    3.80
  12 -23   0    2.70    4.00
  12 -23   0    2.30    3.50
  12  23   0   -4.60    7.70
  12  23   0   11.50    4.50
   0 -24   0   31.50    5.40
   0 -24   0   33.50    6.60
   0  24   0   33.90    6.40
   0  24   0   39.20    6.20
  -1 -24   0   38.60    6.00
  -1 -24   0   42.10    7.00
   1 -24   0   32.30    6.50
   1 -24   0   39.70    6.40
   1 -24   0   38.80    5.00
   1  24   0   29.60    6.50
   1  24   0   42.10    6.30
  -1  24   0   38.60    6.50
  -1  24   0   36.30    6.50
   1  24   0   42.40    7.10
  -2 -24   0   17.40    3.90
   2 -24   0    7.00    3.00
   2 -24   0    4.80    4.00
   2 -24   0    7.50    3.30
  -2 -24   0    8.70    3.70
   2  24   0    9.60    4.10
  -2  24   0    7.30    3.20
   2  24   0    5.10    3.60
   2  24   0    8.20    3.80
  -2  24   0    4.10    3.10
   3 -24   0  167.58   13.50
  -3 -24   0  156.78   13.60
   3 -24   0  167.88   12.50
   3 -24   0  179.38   17.40
  -3 -24   0  166.38   12.30
  -3  24   0  153.28   12.50
   3  24   0  178.98   15.00
  -3  24   0  162.78   15.70
   3  24   0  167.18   15.20
  -3  24   0  172.48   13.30
   3  24   0  144.79   13.60
   4 -24   0   60.39   11.50
   4 -24   0   58.99    6.90
  -4 -24   0   52.89    6.20
   4 -24   0   59.99    9.10
  -4 -24   0   58.09    8.40
  -4  24   0   67.59    6.90
   4  24   0   71.29    9.20
   4  24   0   52.59    9.10
   4  24   0   48.80    8.50
  -4  24   0   57.19    7.10
  -5 -24   0   45.10    6.80
   5 -24   0   37.20    6.70
   5 -24   0   34.80    7.20
   5 -24   0   36.90    6.00
   5  24   0   31.00    7.20
   5  24   0   33.80    7.00
  -5  24   0   49.20    6.40
   5  24   0   36.00    7.60
  -5  24   0   26.60    5.40
   6 -24   0    4.00    3.10
  -6 -24   0   -0.40    1.30
   6 -24   0    1.20    2.40
   6 -24   0    1.80    3.20
  -6 -24   0    1.00    3.10
   6  24   0   -2.40    3.60
   6  24   0   -2.30    2.90
  -6  24   0   -1.60    1.40
   6  24   0    2.50    3.70
  -6  24   0    2.60    2.80
  -6  24   0    0.20    2.20
   7 -24   0  107.39   12.10
  -7 -24   0   95.89    9.30
   7 -24   0   98.99   11.50
   7 -24   0   92.59   10.00
  -7  24   0   90.29    8.80
  -7  24   0   98.49    9.30
   7  24   0  108.69   11.00
   7  24   0   94.99   11.70
   7  24   0  114.69   11.40
  -8 -24   0    6.00    3.10
   8 -24   0    5.30    4.20
   8 -24   0   20.90    5.80
   8 -24   0   13.70    4.00
   8  24   0   10.90    4.50
   8  24   0   13.30    5.10
  -8  24   0    9.00    3.20
   8  24   0    8.40    4.40
  -8  24   0    7.00    3.00
   9 -24   0    0.80    2.50
  -9 -24   0    0.40    1.80
   9 -24   0    5.20    4.50
   9 -24   0   -1.00    3.00
   9  24   0    0.90    4.00
   9  24   0    2.80    4.90
  -9  24   0    4.20    3.30
   9  24   0    0.20    3.40
  10 -24   0   51.89    9.10
  10 -24   0   44.40    8.00
  10 -24   0   48.00    8.00
  10  24   0   53.69    9.10
  10  24   0   37.00    7.30
  10  24   0   34.70    8.80
  11 -24   0  289.97   20.80
  11 -24   0  228.48   19.20
  11 -24   0  252.67   21.20
  11  24   0  248.18   22.60
  11  24   0  298.27   22.30
  11  24   0  225.88   19.30
  12 -24   0  163.58   15.00
  12 -24   0  177.78   15.90
  12 -24   0  162.58   16.70
  12  24   0  179.88   16.30
  12  24   0  176.08   15.50
  12  24   0  183.58   19.00
   0 -25   0    4.30    3.00
   0  25   0    3.80    3.80
   0  25   0    2.70    3.20
  -1 -25   0   16.90    6.30
   1 -25   0   14.20    4.10
  -1 -25   0   18.10    4.70
   1 -25   0   11.00    4.40
   1  25   0   14.00    5.60
  -1  25   0   18.20    4.40
  -1  25   0   12.40    4.50
   1  25   0   17.00    4.90
   1  25   0   11.10    4.60
  -2 -25   0  137.89   11.40
   2 -25   0  129.89   11.80
   2 -25   0  155.98   13.70
  -2 -25   0  157.58   13.30
   2 -25   0  145.09   11.00
  -2  25   0  151.88   12.40
   2  25   0  128.09   12.80
   2  25   0  148.69   12.70
   2  25   0  133.79   13.10
  -2  25   0  128.09   12.40
   3 -25   0   88.89    7.90
   3 -25   0   91.79   11.90
   3 -25   0   83.99    8.90
  -3 -25   0   77.49    7.90
  -3 -25   0   87.59    9.40
   3  25   0   91.19   10.50
  -3  25   0   85.39    9.50
   3  25   0   61.89    9.20
   3  25   0   85.39    9.50
  -3  25   0   77.29    8.70
  -3  25   0   88.39    8.30
   4 -25   0   49.40    6.60
  -4 -25   0   55.69    6.20
   4 -25   0   47.40    7.70
   4 -25   0   41.00    7.40
  -4 -25   0   43.20    7.40
  -4  25   0   51.69    6.40
   4  25   0   44.70    7.80
   4  25   0   54.19    8.10
  -4  25   0   47.30    7.20
   5 -25   0   92.29   10.70
   5 -25   0   81.09    9.00
  -5 -25   0   84.09    8.70
   5 -25   0   72.39    8.20
   5  25   0   73.49    9.80
   5  25   0   66.09    9.70
   5  25   0   88.69   10.80
  -5  25   0   78.99    8.40
  -5  25   0   85.99    8.20
  -6 -25   0   11.20    3.60
   6 -25   0    3.30    3.30
   6 -25   0    7.00    3.90
   6 -25   0   19.30    6.10
   6  25   0    8.20    4.40
  -6  25   0    9.90    3.30
   6  25   0    8.20    4.80
  -6  25   0    4.90    3.10
   6  25   0    2.00    3.90
   7 -25   0   16.70    5.20
   7 -25   0   16.40    4.10
  -7 -25   0   10.10    3.70
   7 -25   0   17.30    6.20
  -7  25   0   16.20    3.70
   7  25   0   17.50    5.60
   7  25   0   21.60    5.70
  -7  25   0    9.90    3.10
   7  25   0   14.80    5.00
   8 -25   0   84.99    8.70
   8 -25   0   64.09   10.30
   8 -25   0   69.69    9.40
   8  25   0   60.79   10.40
   8  25   0   71.39    9.90
  -8  25   0   48.60    9.00
   8  25   0   64.79    9.50
   9 -25   0    1.10    3.90
  -9 -25   0    0.50    2.20
   9 -25   0    4.50    3.40
   9 -25   0    6.00    4.40
   9  25   0    5.40    4.10
   9  25   0    2.10    4.10
   9  25   0    3.00    5.20
  -9  25   0    4.90    3.50
  -9  25   0    4.40    3.00
  10 -25   0   18.70    6.60
  10 -25   0   18.90    5.20
  10 -25   0   30.40    6.30
  10  25   0   22.10    7.50
  10  25   0   33.10    7.00
  10  25   0   25.00    6.20
  11 -25   0   84.39   11.40
  11 -25   0   74.79   10.90
  11  25   0   60.89    9.70
  11  25   0   85.39   13.40
  11  25   0   77.19   11.00
   0 -26   0  186.58   15.60
   0 -26   0  148.39   13.10
   0  26   0  179.38   14.40
   0  26   0  166.78   14.10
   1 -26   0  100.69   11.40
  -1 -26   0   97.09   11.10
  -1 -26   0  101.39    9.80
   1  26   0  115.59   11.00
  -1  26   0  136.39   11.70
  -1  26   0  113.49   10.80
   1  26   0  111.09   11.40
  -2 -26   0   19.70    5.60
  -2 -26   0   25.00    4.80
   2 -26   0   23.20    5.20
   2 -26   0   18.50    5.40
  -2  26   0   12.70    4.30
   2  26   0   17.50    5.50
   2  26   0   14.70    4.60
  -2  26   0   21.60    5.30
  -2  26   0   23.30    4.60
   3 -26   0   14.20    5.20
  -3 -26   0    9.80    4.20
  -3 -26   0   12.50    3.60
   3 -26   0   12.20    3.60
   3 -26   0   15.10    4.00
  -3  26   0   10.10    3.90
   3  26   0   16.00    5.10
  -3  26   0    6.90    3.90
   3  26   0   11.00    4.60
   3  26   0   10.80    5.10
  -3  26   0   16.40    3.80
  -4 -26   0    8.60    3.90
  -4 -26   0    4.70    2.60
   4 -26   0    2.80    3.40
   4 -26   0    6.50    3.90
   4 -26   0    2.90    2.20
   4  26   0   -0.70    3.50
   4  26   0    7.00    3.80
  -4  26   0    4.10    3.10
   4  26   0   -2.30    3.00
  -4  26   0    4.70    2.80
  -5 -26   0   19.80    4.70
   5 -26   0   19.00    6.30
   5 -26   0   20.70    5.40
   5 -26   0   17.70    4.50
   5  26   0   27.70    5.70
  -5  26   0   13.70    3.80
   5  26   0   15.60    5.00
  -5  26   0   19.30    4.50
   5  26   0   17.90    6.10
   6 -26   0   15.10    4.10
  -6 -26   0   34.10    5.90
   6 -26   0   32.70    7.00
   6 -26   0   15.30    5.70
   6  26   0   24.10    6.80
   6  26   0   12.80    5.10
  -6  26   0   24.40    4.60
   6  26   0   26.00    6.50
   7 -26   0    5.70    4.70
   7 -26   0    7.70    3.70
  -7 -26   0    5.50    3.00
   7 -26   0    9.10    4.40
  -7  26   0    4.30    2.90
   7  26   0    1.30    3.90
   7  26   0    2.30    4.10
   7  26   0    7.00    4.30
   8 -26   0   15.10    4.40
   8 -26   0   13.70    4.70
   8 -26   0    4.80    4.30
   8  26   0    9.60    6.20
   8  26   0   17.80    5.50
   8  26   0   14.70    5.40
  -8  26   0   13.40    4.10
   9 -26   0   86.59   12.20
   9 -26   0   77.69   10.80
   9 -26   0   80.49    9.30
   9  26   0   89.49   13.20
  -9  26   0   74.19    8.00
   9  26   0   72.39   10.30
   9  26   0   69.39   10.40
  10 -26   0   37.50    7.80
  10 -26   0   60.99    8.60
  10 -26   0   60.99   10.10
  10  26   0   48.50    8.70
  10  26   0   50.59    8.80
  10  26   0   44.40   10.40
   0 -27   0    3.40    3.60
   0 -27   0    0.10    1.30
   0 -27   0    5.20    3.10
   0  27   0    7.30    3.80
   0  27   0    3.20    3.50
   1 -27   0   61.69    9.50
   1 -27   0   49.50    7.30
  -1 -27   0   62.39    9.20
   1  27   0   55.59    8.10
   1  27   0   45.20    8.20
  -1  27   0   49.30    7.90
  -2 -27   0    4.90    3.40
  -2 -27   0    1.20    2.30
   2 -27   0    6.80    3.30
   2 -27   0    9.60    4.40
   2 -27   0   -0.90    1.50
   2  27   0    1.30    3.20
   2  27   0   -1.70    3.20
   2  27   0    5.90    3.30
  -2  27   0   -0.90    2.60
  -2  27   0    2.40    3.20
   3 -27   0   48.10    8.40
  -3 -27   0   52.39    7.10
  -3 -27   0   46.40    7.80
   3 -27   0   66.69    9.10
   3  27   0   71.09    9.50
  -3  27   0   57.99    8.70
   3  27   0   62.79    9.20
  -3  27   0   51.59    7.20
   3  27   0   59.59    9.00
   4 -27   0    0.70    3.90
  -4 -27   0    2.90    2.90
   4 -27   0    3.70    3.30
  -4 -27   0   -1.40    1.60
   4 -27   0   -0.70    2.20
   4  27   0   -0.70    3.40
   4  27   0    1.10    3.60
   4  27   0   -1.90    3.60
  -4  27   0   -2.30    2.70
  -4  27   0   -1.90    2.70
  -4  27   0   -0.90    2.90
  -5 -27   0    1.00    1.80
   5 -27   0    3.10    2.70
   5 -27   0    1.40    3.70
   5 -27   0    8.10    3.30
  -5 -27   0    3.90    3.50
  -5  27   0    3.60    3.10
   5  27   0    2.80    4.00
   5  27   0    3.70    3.50
  -5  27   0   -0.60    2.60
   5  27   0   -2.40    3.40
  -5  27   0   -3.10    2.80
   6 -27   0   31.50    7.90
   6 -27   0   41.00    6.10
  -6 -27   0   34.20    5.90
   6 -27   0   33.60    6.40
  -6  27   0   43.70    6.40
   6  27   0   29.10    6.40
   6  27   0   46.30    9.40
   6  27   0   26.20    6.50
  -6  27   0   26.20    4.80
   7 -27   0    4.50    3.30
   7 -27   0    3.50    4.10
  -7 -27   0    6.20    3.60
   7 -27   0   -3.10    3.80
   7  27   0   -1.80    3.70
   7  27   0   12.60    6.00
  -7  27   0    4.00    2.60
   7  27   0    2.20    4.40
   8 -27   0  248.48   19.80
   8 -27   0  220.48   20.40
   8 -27   0  257.97   18.80
  -8  27   0  224.48   17.60
   8  27   0  252.37   21.80
   8  27   0  252.47   20.00
   8  27   0  255.77   20.20
   9 -27   0   60.69    8.30
   9 -27   0   55.39    8.80
   9 -27   0   68.99   11.10
   9  27   0   46.40    8.40
   9  27   0   47.70   16.00
   9  27   0   39.90    8.10
   0 -28   0   31.10    5.70
   0 -28   0   40.00    7.40
   0  28   0   29.90    6.60
   0  28   0   40.90    7.20
   1 -28   0   14.10    4.10
  -1 -28   0   17.80    4.70
   1 -28   0   18.70    5.80
  -1 -28   0   11.30    4.60
  -1  28   0   15.40    4.60
  -1  28   0   13.80    4.40
   1  28   0   16.00    5.10
   1  28   0   14.40    5.30
  -2 -28   0   69.39    9.30
   2 -28   0   45.50    9.20
  -2 -28   0   47.80    6.80
   2 -28   0   54.99    7.80
  -2  28   0   64.29    7.20
   2  28   0   48.70    7.80
   2  28   0   55.89    9.50
  -2  28   0   64.29    8.70
  -2  28   0   45.90    7.40
  -3 -28   0  136.09   12.50
   3 -28   0  110.39   13.10
   3 -28   0  125.69   11.80
  -3  28   0  121.89   10.90
  -3  28   0  117.49   11.00
   3  28   0  119.09   13.10
   3  28   0  128.19   13.00
   3  28   0  134.59   12.70
  -4 -28   0   88.19    9.30
   4 -28   0   73.99   10.40
   4 -28   0   65.89   10.60
   4  28   0   82.79   10.30
   4  28   0   64.89   10.40
  -4  28   0   62.29    7.70
  -4  28   0   70.29    8.40
   4  28   0   68.99   10.40
   5 -28   0   -0.70    3.10
  -5 -28   0    2.40    2.30
  -5 -28   0    0.90    3.20
   5 -28   0   -1.00    4.00
   5 -28   0    0.10    2.40
  -5  28   0   -4.90    3.70
   5  28   0   12.40    4.70
   5  28   0    2.80    4.40
  -5  28   0   -2.60    3.60
   5  28   0   -0.50    4.10
  -5  28   0    2.40    2.90
   6 -28   0    8.10    4.00
   6 -28   0   10.90    5.60
  -6 -28   0   16.30    4.60
   6 -28   0    9.50    3.70
   6  28   0   23.50    5.80
   6  28   0   10.50    4.60
  -6  28   0   11.20    3.50
   6  28   0   23.50    7.20
   7 -28   0   11.60    4.20
   7 -28   0   19.60    7.90
  -7 -28   0    6.40    3.30
  -7  28   0   11.30    3.60
   7  28   0    9.50    6.50
   7  28   0   20.20    8.30
   7  28   0   11.90    5.30
   8 -28   0   15.30    6.30
   8 -28   0   17.90    5.60
   8  28   0   18.20    9.40
   8  28   0    6.00    8.20
   8  28   0   19.40    5.90
   0 -29   0   -1.80    3.10
   0 -29   0   -0.40    1.90
   0 -29   0    5.50    3.40
   0  29   0    8.90    4.00
   0  29   0    2.10    3.30
   1 -29   0    0.80    3.70
  -1 -29   0   -3.00    3.20
   1 -29   0    2.30    3.00
  -1 -29   0    5.10    3.00
  -1  29   0    3.70    3.90
   1  29   0    4.90    3.80
  -1  29   0    7.00    3.80
   1  29   0    3.50    3.30
  -2 -29   0   16.30    4.00
   2 -29   0   19.00    6.30
  -2 -29   0    9.10    4.90
   2 -29   0    9.40    4.30
   2  29   0   10.10    4.90
  -2  29   0   12.80    4.00
  -2  29   0    7.10    4.40
   2  29   0   13.20    4.70
  -2  29   0    6.90    3.80
  -3 -29   0   58.39    9.00
  -3 -29   0   59.09    7.80
   3 -29   0   57.49    9.50
   3 -29   0   53.89    8.10
  -3  29   0   46.40    7.10
   3  29   0   68.69    9.50
   3  29   0   50.39    9.40
  -3  29   0   52.69    7.50
   4 -29   0   30.20    7.50
   4 -29   0   21.30    5.50
  -4 -29   0   15.30    5.10
   4  29   0   20.20    6.80
   4  29   0   18.30    6.20
   4  29   0   14.80    5.20
  -4  29   0   17.80    4.80
  -5 -29   0   82.59    9.80
   5 -29   0   87.49   10.40
   5 -29   0   85.99   13.40
  -5  29   0   81.59    9.10
   5  29   0   87.99   12.40
   5  29   0   85.19   11.60
   5  29   0   81.49   10.90
   6 -29   0  148.49   15.70
   6 -29   0  149.09   12.80
  -6 -29   0  130.59   13.00
   6 -29   0  157.08   15.90
   6  29   0  174.68   15.00
   6  29   0  169.88   16.20
  -6  29   0  146.69   12.60
   7 -29   0    1.00    3.80
   7 -29   0   18.70    5.90
  -7 -29   0   -0.80    3.40
   7  29   0    9.20    5.30
   7  29   0    4.10    4.40
  -7  29   0    1.80    2.90
   7  29   0    8.20    6.10
   0 -30   0  115.09   11.00
   0 -30   0  114.29   14.20
   0  30   0   91.59   11.00
   0  30   0  108.99   11.90
  -1 -30   0   74.19    8.70
   1 -30   0   78.09   11.30
  -1 -30   0   68.09   10.30
   1 -30   0   63.59    9.20
  -1  30   0   59.79    9.30
  -1  30   0   67.19    9.50
   1  30   0   68.09   10.20
   1  30   0   74.99   10.00
   2 -30   0   -0.80    2.40
  -2 -30   0    8.30    3.60
   2 -30   0    4.00    4.40
   2 -30   0   11.90    3.80
  -2 -30   0   11.40    5.10
   2  30   0    7.80    5.00
  -2  30   0    4.60    5.10
  -2  30   0   -5.00    4.10
  -2  30   0    7.80    3.70
   2  30   0    7.80    4.80
   3 -30   0    9.90    4.40
   3 -30   0   38.10   12.00
  -3 -30   0   18.80    5.80
  -3  30   0    0.60    4.30
  -3  30   0   17.10    5.10
   3  30   0   16.50    8.90
   3  30   0   23.10    6.60
   4 -30   0   25.40    8.20
  -4 -30   0   24.90    5.50
   4 -30   0   15.50    6.80
   4  30   0    9.20    5.10
   4  30   0   24.90    7.20
   4  30   0   39.60    9.00
  -4  30   0   20.70    5.50
   5 -30   0   27.60    7.80
   5 -30   0   26.40    6.20
  -5 -30   0   33.50    6.60
   5  30   0   28.80    7.50
   5  30   0   29.10    6.70
   5  30   0   32.70   10.40
  -5  30   0   31.10    6.00
   0 -31   0   -0.60    3.50
   0 -31   0    6.80    3.70
   0  31   0    5.80    4.40
   0  31   0    8.40    4.60
   1 -31   0    3.40    4.70
  -1 -31   0   -4.30    6.40
   1 -31   0   -5.30    3.40
   1  31   0    8.90    5.00
  -1  31   0    5.80    4.40
   1  31   0    2.30    3.60
  -1  31   0    6.50    4.00
  -2 -31   0   31.00    6.10
   2 -31   0   25.40    6.40
   2  31   0   24.60    6.60
   2  31   0   29.80    6.20
  -2  31   0   47.70    8.30
  -2  31   0   32.60    6.60
  19   0  -1   17.70    4.10
  19   0  -1    2.50    3.30
  19   0  -1    7.90    6.30
  18   0  -1    6.30    5.10
  18   0  -1    3.40    3.40
  18   0  -1    4.10    3.50
  17   0  -1  204.58   15.40
  17   0  -1  203.18   15.70
  16   0  -1    3.60    2.60
  16   0  -1    1.10    2.40
  15   0  -1   -0.10    1.80
  15   0  -1    3.30    2.70
  14   0  -1    2.60    2.40
  14   0  -1    2.80    2.50
  13   0  -1   68.19    6.30
  13   0  -1   64.79    7.00
  13   0  -1   75.19    7.00
 -12   0   1    1.70    1.10
  12   0  -1   -1.10    1.80
  12   0  -1    1.90    2.00
  12   0  -1   -0.50    1.30
  12   0  -1   -1.60    1.80
 -11   0   1  377.86   23.40
  11   0  -1  379.96   24.80
  11   0  -1  408.36   24.30
  11   0  -1  454.65   25.00
 -11   0   1  374.76   23.00
 -10   0   1    0.30    1.10
  10   0  -1   -0.50    1.50
 -10   0   1    1.70    1.40
  10   0  -1    0.10    1.30
  10   0  -1    0.00    1.10
  10   0  -1    1.00    1.70
  10   0  -1    1.50    1.80
 -10   0   1    1.30    1.00
   9   0  -1    1.60    1.10
   9   0  -1    2.70    1.70
   9   0  -1   -1.00    1.20
   9   0  -1    0.80    1.10
   9   0  -1    1.10    1.60
  -9   0   1    1.30    1.00
   9   0  -1    1.30    1.70
   8   0  -1    1.10    1.10
  -8   0   1    0.30    0.90
  -8   0   1    0.60    0.90
   8   0  -1    0.90    1.20
   8   0  -1   -0.20    1.00
   8   0  -1    1.20    1.30
  -8   0   1    0.80    1.10
   8   0  -1   -0.10    0.80
   8   0  -1   -1.00    1.10
   7   0  -1  428.66   26.00
  -7   0   1  449.95   25.40
   7   0  -1  434.16   26.70
   7   0  -1  441.26   25.80
  -7   0   1  429.36   26.20
   7   0  -1  406.86   26.10
   7   0  -1  478.75   25.40
  -7   0   1  443.46   25.70
   6   0  -1    0.70    0.90
  -6   0   1    0.90    0.90
  -6   0   1   -0.10    0.80
   6   0  -1    0.10    0.90
   6   0  -1    0.60    1.10
   6   0  -1   -0.30    0.70
  -6   0   1   -0.70    0.90
  -5   0   1 1313.17   70.79
   5   0  -1 1186.38   70.89
  -5   0   1 1314.07   70.39
  -5   0   1 1229.38   70.69
  -5   0   1 1341.17   70.99
   5   0  -1 1230.98   70.69
   5   0  -1 1192.78   70.39
   5   0  -1 1212.38   70.89
   4   0  -1   -0.10    0.70
   4   0  -1    1.00    0.80
   4   0  -1   -0.10    0.70
  -4   0   1   -0.30    0.50
  -4   0   1    0.20    0.80
   4   0  -1    0.30    0.60
  -4   0   1    0.20    0.70
  -4   0   1   -0.40    0.60
   3   0  -1   39.60    3.00
  -3   0   1   44.20    3.10
   3   0  -1   40.50    2.70
  -3   0   1   43.50    2.70
  -3   0   1   47.10    2.60
   3   0  -1   34.20    3.10
  -3   0   1   44.70    3.20
   3   0  -1   40.50    3.00
   3   0  -1   41.10    2.80
  -3   0   1   37.80    3.00
   2   0  -1   -0.20    0.40
   2   0  -1    0.10    0.40
   2   0  -1   -0.10    0.50
  -2   0   1   -0.20    0.60
   2   0  -1    0.20    0.40
  -2   0   1   -0.20    0.40
  -2   0   1    0.30    0.50
   2   0  -1   -0.30    0.60
  -2   0   1   -0.30    0.40
  -2   0   1    0.40    0.50
  -1   0   1    0.00    0.20
  -1   0  -1 1279.97   76.99
   1   0   1 1465.45   77.09
   2   0   1   -0.10    0.90
   2   0   1   -0.50    0.80
   2   0   1    0.90    0.80
  -2   0  -1   -0.20    0.80
  -2   0  -1    0.00    0.80
   3   0   1   20.50    2.30
   3   0   1   17.40    1.90
   3   0   1   16.90    1.70
  -3   0  -1   18.90    2.00
  -3   0  -1   17.80    1.80
   3   0   1   15.00    1.50
  -4   0  -1    0.10    0.90
   4   0   1    0.10    0.70
  -4   0  -1    1.80    1.00
   4   0   1    0.50    0.60
   4   0   1   -0.60    1.00
   4   0   1    0.70    0.80
   4   0   1    0.50    0.80
   5   0   1  168.28   10.70
  -5   0  -1  187.08   10.50
   5   0   1  171.68   10.40
   5   0   1  158.58   10.40
  -5   0  -1  167.18   10.80
   5   0   1  160.88   10.10
   5   0   1  182.58   11.50
   7   0   1  238.98   14.30
  -7   0  -1  229.08   14.90
   7   0   1  245.68   15.70
   7   0   1  235.38   14.50
   7   0   1  241.78   13.90
  -7   0  -1  236.88   14.30
   7   0   1  214.48   14.60
   8   0   1    0.80    1.10
   8   0   1    1.00    1.40
   8   0   1   -0.10    1.10
  -8   0  -1   -0.70    1.00
  -8   0  -1   -0.20    1.10
   8   0   1    0.10    1.40
   8   0   1    0.20    0.90
   9   0   1   26.70    3.60
  -9   0  -1   24.40    4.20
   9   0   1   23.10    3.60
   9   0   1   26.30    4.40
   9   0   1   30.70    3.20
   9   0   1   30.60    2.70
  10   0   1    1.30    1.30
 -10   0  -1   -0.90    1.60
  10   0   1   -0.50    0.90
  10   0   1   -1.20    1.30
  10   0   1    1.30    1.20
  10   0   1    0.00    1.60
  11   0   1  601.24   35.30
  11   0   1  586.84   35.20
  11   0   1  561.14   34.50
  11   0   1  594.14   33.80
  12   0   1    2.00    1.30
  12   0   1    0.60    1.80
  12   0   1   -0.50    1.80
  12   0   1   -0.50    1.30
  13   0   1  149.99   10.90
  13   0   1  130.89    9.80
  13   0   1  125.39   10.40
  14   0   1    0.80    2.40
  14   0   1    0.70    2.20
  15   0   1  201.68   15.00
  15   0   1  215.58   15.40
  16   0   1    2.00    3.30
  16   0   1    4.80    2.80
  17   0   1  448.06   32.80
  17   0   1  448.16   29.80
  17   0   1  473.05   29.70
  18   0   1    0.20    5.40
  18   0   1    8.20    3.70
  18   0   1    4.10    2.80
  19  -1  -1   13.00    4.40
  19  -1  -1    6.50    3.90
  19  -1  -1   18.20    7.10
  19   1  -1    5.30    3.50
  19   1  -1    7.90    6.20
  19   1  -1   21.40    4.90
  18  -1  -1   14.40    5.90
  18  -1  -1   22.00    5.10
  18  -1  -1   18.60    4.70
  18   1  -1   12.90    5.80
  18   1  -1   21.20    4.50
  18   1  -1   14.50    4.40
  17  -1  -1  225.98   16.80
  17  -1  -1  224.48   16.60
  17   1  -1  228.48   16.90
  17   1  -1  218.98   19.30
  17   1  -1  216.68   16.30
  16  -1  -1   -1.10    2.60
  16  -1  -1    3.60    2.60
  16   1  -1    5.30    2.60
  16   1  -1   -0.90    2.10
  15  -1  -1   42.40    6.10
  15  -1  -1   40.20    6.20
  15   1  -1   40.90    6.10
  15   1  -1   37.20    5.60
  14  -1  -1  144.99   12.80
  14  -1  -1  184.78   13.10
  14   1  -1  177.48   12.70
  14   1  -1  176.08   13.10
  13  -1  -1   14.80    3.10
  13  -1  -1   15.20    3.70
  13  -1  -1   11.80    3.30
  13   1  -1   16.20    3.70
  13   1  -1   16.60    3.50
  12  -1  -1   16.20    3.00
  12  -1  -1   18.30    3.90
  12  -1  -1   15.60    2.80
  12  -1  -1   17.80    3.70
  12   1  -1   14.60    3.70
  12   1  -1   18.80    3.60
 -12   1   1   19.70    2.90
  12   1  -1   20.10    3.90
  12   1  -1   23.30    3.50
  11  -1  -1 3434.06  194.18
  11  -1  -1 3819.52  193.08
  11  -1  -1 3247.88  194.18
  11  -1  -1 3465.85  193.58
 -11  -1   1 3293.17  192.58
 -11   1   1 3341.67  192.48
  11   1  -1 3304.27  194.18
  11   1  -1 3764.92  194.18
 -11   1   1 3256.97  192.98
  10  -1  -1    2.20    1.90
  10  -1  -1    1.90    1.90
  10  -1  -1    2.70    1.90
  10  -1  -1    2.20    1.50
 -10  -1   1    7.20    1.50
 -10  -1   1    5.90    1.40
 -10  -1   1    3.30    1.50
  10  -1  -1    3.20    1.40
 -10  -1   1    1.50    1.70
 -10   1   1    3.60    1.30
  10   1  -1    6.20    2.30
  10   1  -1    1.90    1.70
 -10   1   1    5.50    1.70
  10   1  -1    0.70    1.70
 -10   1   1    2.10    2.10
  10   1  -1    5.10    1.90
  -9  -1   1  121.59    7.70
   9  -1  -1  120.39    8.30
  -9  -1   1  113.89    7.90
   9  -1  -1  118.49    7.90
  -9  -1   1  119.99    8.80
   9  -1  -1  119.39    9.00
   9  -1  -1  118.09    9.00
   9  -1  -1  111.59    8.70
   9  -1  -1  122.49    9.60
   9   1  -1  133.49    9.70
  -9   1   1  119.19    8.90
   9   1  -1  121.49    8.70
   9   1  -1  129.29    7.70
  -9   1   1  116.09    8.00
  -9   1   1  118.79    8.10
   9   1  -1  127.29    9.00
   9   1  -1  119.09    8.40
  -8  -1   1   85.29    5.80
  -8  -1   1   83.29    5.50
   8  -1  -1   85.29    6.10
   8  -1  -1   79.19    6.40
   8  -1  -1   85.09    7.10
   8  -1  -1   92.39    5.90
   8  -1  -1   84.59    6.60
   8  -1  -1   81.19    6.60
  -8  -1   1   83.09    6.40
   8   1  -1   74.89    6.10
   8   1  -1   86.99    5.50
  -8   1   1   84.59    6.60
   8   1  -1   75.09    6.20
  -8   1   1   77.69    5.80
  -8   1   1   87.09    5.90
   8   1  -1   81.39    6.50
   8   1  -1   85.59    7.00
  -7  -1   1    5.40    1.50
   7  -1  -1    2.90    1.60
   7  -1  -1    6.70    1.40
  -7  -1   1    7.70    1.30
   7  -1  -1    4.90    1.40
   7  -1  -1    4.90    1.70
   7  -1  -1    6.00    1.80
   7  -1  -1    4.40    1.70
  -7  -1   1    4.40    1.30
  -7   1   1    5.60    1.70
   7   1  -1    3.80    1.40
   7   1  -1    6.60    1.70
  -7   1   1    5.50    1.40
   7   1  -1    3.80    1.40
   7   1  -1    5.10    1.10
  -7   1   1    6.50    1.50
   6  -1  -1    5.50    1.50
  -6  -1   1    5.40    1.30
  -6  -1   1    5.90    1.10
  -6  -1   1    4.40    1.50
   6  -1  -1    3.70    1.40
   6  -1  -1    5.20    1.20
   6  -1  -1    7.80    1.50
   6  -1  -1    3.50    1.50
   6  -1  -1    3.90    1.50
  -6   1   1    5.30    1.60
  -6   1   1    5.50    1.20
   6   1  -1    4.10    1.50
   6   1  -1    4.90    1.00
  -6   1   1    6.60    1.50
   6   1  -1    4.50    1.40
   6   1  -1    2.90    1.10
  -6   1   1    3.80    1.30
  -5  -1   1 1601.44   87.69
  -5  -1   1 1634.14   88.49
   5  -1  -1 1509.95   88.29
   5  -1  -1 1614.04   88.89
   5  -1  -1 1677.43   88.79
   5  -1  -1 1484.25   88.59
   5  -1  -1 1499.95   88.09
  -5  -1   1 1648.34   88.39
  -5  -1   1 1634.64   87.89
   5   1  -1 1475.25   87.89
   5   1  -1 1459.55   88.49
  -5   1   1 1671.13   88.49
   5   1  -1 1445.76   88.29
  -5   1   1 1640.44   88.69
  -5   1   1 1596.04   88.09
   5   1  -1 1561.14   88.39
   5   1  -1 1572.74   87.79
  -5   1   1 1513.15   88.19
  -4  -1   1  122.39    7.90
  -4  -1   1  132.19    7.30
   4  -1  -1  120.09    7.90
   4  -1  -1  126.69    8.10
   4  -1  -1  121.39    7.60
  -4  -1   1  132.49    7.40
  -4  -1   1  130.19    7.90
  -4  -1   1  139.49    8.00
   4  -1  -1  125.69    7.80
   4  -1  -1  130.99    8.10
   4   1  -1  114.29    7.40
   4   1  -1  124.09    7.90
  -4   1   1  133.19    8.00
   4   1  -1  121.09    7.80
  -4   1   1  117.79    7.70
  -4   1   1  129.19    7.60
   4   1  -1  120.99    8.00
   4   1  -1  124.29    7.40
  -4   1   1  129.39    8.10
   3  -1  -1  485.65   29.00
  -3  -1   1  525.25   29.10
  -3  -1   1  555.34   28.80
  -3  -1   1  555.24   29.20
   3  -1  -1  507.65   29.30
   3  -1  -1  481.45   29.20
   3  -1  -1  508.35   29.30
  -3  -1   1  498.45   29.10
  -3  -1   1  539.55   28.70
  -3   1   1  537.55   29.30
   3   1  -1  495.65   29.10
  -3   1   1  531.65   28.90
  -3   1   1  459.05   29.10
   3   1  -1  494.85   28.80
   3   1  -1  498.05   29.00
   3   1  -1  479.35   29.20
  -3   1   1  529.95   29.20
  -2  -1   1   11.80    1.40
   2  -1  -1   13.10    1.60
   2  -1  -1   12.70    1.30
   2  -1  -1   10.80    1.20
  -2  -1   1   13.00    1.20
  -2  -1   1   12.60    1.20
  -2  -1   1   14.40    1.50
  -2   1   1   12.50    1.30
  -2   1   1   12.10    1.40
  -2   1   1   13.50    1.20
   2   1  -1   10.60    1.20
   2   1  -1   13.20    1.40
   2   1  -1   12.30    1.20
  -2   1   1   12.90    1.50
   2   1  -1   10.00    1.40
  -1   1   1  578.04   31.80
   1   1  -1  529.45   31.70
  -1   1   1  582.54   31.70
  -2  -1  -1  544.65   28.10
   2  -1   1  472.55   27.90
   2  -1   1  468.15   27.90
   2  -1   1  481.95   28.10
   2  -1   1  498.85   28.50
   2  -1   1  487.85   28.30
  -2   1  -1  538.25   28.20
  -2   1  -1  532.15   28.00
   2   1   1  507.25   28.50
  -2   1  -1  439.46   28.40
   2   1   1  474.45   28.00
   3  -1   1  118.79    7.00
   3  -1   1  115.69    7.60
  -3  -1  -1  129.89    7.50
   3  -1   1  132.39    8.00
   3  -1   1  108.69    7.20
   3  -1   1  125.89    7.40
   3  -1   1  116.69    7.10
  -3   1  -1  129.99    7.80
   3   1   1  111.29    7.10
   3   1   1  128.39    8.00
  -3   1  -1  129.19    7.50
   3   1   1  118.49    7.40
   3   1   1  112.09    7.10
   4  -1   1 1392.06   81.69
   4  -1   1 1377.16   81.19
   4  -1   1 1333.27   81.19
   4  -1   1 1551.54   82.19
  -4  -1  -1 1554.94   81.59
   4  -1   1 1430.76   81.09
  -4   1  -1 1474.05   82.29
   4   1   1 1437.96   81.49
   4   1   1 1553.44   82.19
   4   1   1 1364.16   80.99
  -4   1  -1 1559.04   81.49
   4   1   1 1336.37   81.19
   5  -1   1 2918.21  168.18
   5  -1   1 3024.30  168.08
   5  -1   1 2798.92  168.28
  -5  -1  -1 3196.38  168.78
   5  -1   1 2840.22  168.68
   5  -1   1 3127.79  169.38
   5   1   1 2999.80  168.58
   5   1   1 3162.08  169.38
   5   1   1 2993.20  167.78
   5   1   1 2749.52  168.38
  -5   1  -1 3125.29  168.48
   5   1   1 3098.99  168.48
  -5   1  -1 3026.00  168.88
   6  -1   1  617.94   33.90
   6  -1   1  553.74   33.80
   6  -1   1  600.34   35.20
   6  -1   1  551.14   34.40
  -6  -1  -1  600.04   34.50
   6  -1   1  578.64   34.10
   6   1   1  590.44   34.10
   6   1   1  598.14   35.20
   6   1   1  560.84   34.20
  -6   1  -1  617.64   34.20
   6   1   1  610.44   34.10
   6   1   1  621.34   33.50
  -6   1  -1  583.44   34.70
   7  -1   1 3153.58  194.18
   7  -1   1 3478.75  195.08
   7  -1   1 3483.35  193.98
   7  -1   1 3578.44  193.48
  -7  -1  -1 3440.76  194.28
  -7   1  -1 3359.56  194.48
   7   1   1 3391.46  194.08
   7   1   1 3570.84  193.08
   7   1   1 3476.75  193.78
   7   1   1 3528.05  193.88
   7   1   1 3523.95  195.18
   8  -1   1  302.57   19.60
   8  -1   1  305.67   18.60
   8  -1   1  311.57   19.30
   8  -1   1  331.67   18.90
  -8  -1  -1  305.47   19.60
   8  -1   1  302.97   19.50
   8  -1   1  323.67   20.50
  -8   1  -1  315.27   19.10
   8   1   1  315.47   19.40
  -8   1  -1  307.57   19.80
   8   1   1  302.37   19.10
   8   1   1  323.47   19.10
   8   1   1  326.27   20.60
   8   1   1  337.97   18.30
   9  -1   1  346.27   22.10
   9  -1   1  356.46   21.20
   9  -1   1  332.17   21.70
  -9  -1  -1  329.07   22.10
   9  -1   1  352.16   20.90
   9  -1   1  355.66   23.10
   9  -1   1  358.86   22.30
   9   1   1  386.26   20.70
   9   1   1  378.16   23.40
   9   1   1  361.16   21.80
  -9   1  -1  335.67   22.30
  -9   1  -1  357.66   21.50
   9   1   1  371.06   21.60
   9   1   1  353.96   21.80
  10  -1   1    1.50    1.20
  10  -1   1    1.70    1.40
  10  -1   1    1.10    1.90
 -10  -1  -1    3.00    1.80
  10  -1   1    0.30    1.70
  10   1   1    1.30    1.60
  10   1   1    0.30    1.40
  10   1   1    1.90    1.10
  10   1   1    1.40    1.50
  10   1   1    1.20    1.80
  11  -1   1    2.60    1.30
  11  -1   1    2.00    2.20
  11  -1   1    2.70    1.40
  11  -1   1    3.70    2.00
  11   1   1    2.80    1.60
  11   1   1    1.30    1.90
  11   1   1    3.50    1.20
  11   1   1    2.40    1.70
  12  -1   1   43.60    3.90
  12  -1   1   49.00    6.10
  12  -1   1   35.20    4.10
  12  -1   1   39.40    5.30
  12   1   1   46.10    5.10
  12   1   1   37.60    4.20
  12   1   1   42.60    5.00
  13  -1   1  314.97   19.80
  13  -1   1  315.97   20.30
  13  -1   1  324.37   18.60
  13  -1   1  286.57   21.80
  13   1   1  283.97   20.10
  13   1   1  303.27   20.00
  13   1   1  292.77   19.80
  14  -1   1   39.70    5.80
  14  -1   1   40.30    5.70
  14  -1   1   35.10    4.70
  14   1   1   34.10    5.10
  14   1   1   39.80    5.70
  15  -1   1   -0.20    2.60
  15  -1   1   -1.00    1.90
  15   1   1    2.20    1.90
  15   1   1    2.70    2.30
  16  -1   1   12.30    3.90
  16  -1   1   18.80    4.20
  16   1   1   16.30    5.30
  16   1   1   18.00    4.20
  16   1   1   12.30    3.40
  17  -1   1    6.10    3.20
  17  -1   1    1.50    3.00
  17   1   1    7.70    5.60
  17   1   1    6.40    2.90
  18  -1   1    3.70    3.10
  18  -1   1    2.10    3.20
  18  -1   1    3.40    5.90
  18   1   1   -0.40    5.10
  18   1   1   -0.80    2.60
  18   1   1   11.70    3.70
  19  -2  -1    9.80    4.60
  19  -2  -1   23.70    5.20
  19  -2  -1   32.90    8.90
  19   2  -1   34.90    6.10
  19   2  -1   25.60    8.10
  19   2  -1   23.60    5.00
  18  -2  -1   33.00    6.10
  18  -2  -1   34.30    6.10
  18   2  -1   32.80    6.20
  18   2  -1   20.60    7.20
  18   2  -1   29.40    5.70
  17  -2  -1   55.99    7.70
  17  -2  -1   51.29    7.10
  17   2  -1   51.09    7.50
  17   2  -1   51.19    7.00
  17   2  -1   47.00    9.50
  16  -2  -1   49.30    7.50
  16  -2  -1   50.99    9.00
  16   2  -1   58.19    6.70
  16   2  -1   37.40    8.20
  16   2  -1   68.69    7.10
  15  -2  -1   46.50    7.00
  15  -2  -1   57.19    7.40
  15   2  -1   68.19   16.00
  15   2  -1   56.19    6.20
  15   2  -1   56.29    7.40
  14  -2  -1  158.98   12.10
  14  -2  -1  152.38   11.30
  14  -2  -1  141.49   12.10
  14   2  -1  158.58   12.20
  14   2  -1  154.68   11.60
  13  -2  -1  119.49    9.90
  13  -2  -1  118.89    9.80
  13  -2  -1  123.09    8.50
  13   2  -1  113.39    9.70
  13   2  -1  108.39    9.20
 -13   2   1  113.59    8.60
  12  -2  -1   14.50    3.60
  12  -2  -1   22.30    3.20
  12  -2  -1   18.50    3.10
  12  -2  -1   16.00    3.40
 -12   2   1   18.30    3.00
  12   2  -1   18.90    4.10
  12   2  -1   19.80    3.60
  12   2  -1   20.40    3.90
  11  -2  -1  146.89    9.90
  11  -2  -1  123.79   10.40
  11  -2  -1  146.99   10.70
  11  -2  -1  157.88    9.70
  11   2  -1  134.79   10.50
 -11   2   1  134.69    9.00
  11   2  -1  146.09   10.20
 -11   2   1  137.49    9.70
  10  -2  -1  142.69   10.90
 -10  -2   1  141.69    8.80
  10  -2  -1  134.29    9.50
  10  -2  -1  124.19   10.10
 -10  -2   1  147.99    8.80
 -10  -2   1  126.29    9.90
  10  -2  -1  162.88    9.40
 -10   2   1  131.39    9.30
  10   2  -1  130.39    9.90
 -10   2   1  129.99    8.90
  10   2  -1  145.39    9.90
  10   2  -1  130.79   10.70
  10   2  -1  136.89    9.80
  -9  -2   1   46.50    3.80
   9  -2  -1   40.90    4.70
  -9  -2   1   54.09    4.10
   9  -2  -1   49.50    4.20
  -9  -2   1   45.10    4.50
   9  -2  -1   44.40    4.00
   9  -2  -1   42.40    4.90
   9  -2  -1   54.79    5.00
   9  -2  -1   47.50    5.30
   9   2  -1   53.29    5.40
   9   2  -1   47.30    4.50
   9   2  -1   47.30    4.40
  -9   2   1   45.20    4.00
  -9   2   1   50.39    4.90
  -9   2   1   41.60    4.10
   9   2  -1   45.30    4.70
  -8  -2   1   59.29    4.50
  -8  -2   1   59.09    4.00
   8  -2  -1   59.79    4.60
   8  -2  -1   63.29    5.80
  -8  -2   1   59.49    4.90
   8  -2  -1   51.99    5.10
   8  -2  -1   56.59    4.60
   8  -2  -1   53.59    5.20
   8  -2  -1   62.19    5.40
  -8  -2   1   60.79    4.50
   8   2  -1   57.69    4.80
   8   2  -1   57.59    5.10
  -8   2   1   55.99    4.60
  -8   2   1   62.09    5.40
   8   2  -1   63.19    4.90
  -8   2   1   54.19    4.60
   7  -2  -1  116.09    8.50
  -7  -2   1  116.79    7.90
   7  -2  -1  103.99    8.00
   7  -2  -1  115.29    8.20
   7  -2  -1  116.99    8.20
  -7  -2   1  121.79    7.60
   7  -2  -1  119.09    8.00
   7  -2  -1  109.19    7.40
   7   2  -1  113.49    7.70
   7   2  -1  119.99    7.00
  -7   2   1  116.69    8.30
  -7   2   1  112.99    7.50
   7   2  -1  107.79    7.90
  -7   2   1  117.19    7.60
  -7   2   1  109.59    7.60
   7   2  -1  109.19    7.80
   6  -2  -1  182.98   10.90
   6  -2  -1  173.38   11.60
  -6  -2   1  179.38   10.90
  -6  -2   1  183.58   11.10
  -6  -2   1  184.68   10.30
   6  -2  -1  169.38   11.40
   6  -2  -1  170.58   10.70
   6  -2  -1  166.18   11.30
   6  -2  -1  173.08   11.30
  -6   2   1  185.28   11.50
  -6   2   1  189.88   11.10
  -6   2   1  178.18   11.10
   6   2  -1  178.88   10.40
  -6   2   1  182.28   10.80
   6   2  -1  153.58   11.10
   6   2  -1  170.78   11.10
   6   2  -1  169.78   10.90
   5  -2  -1  192.58   11.30
   5  -2  -1  185.98   11.20
  -5  -2   1  191.28   11.40
  -5  -2   1  190.48   11.70
   5  -2  -1  167.68   11.60
   5  -2  -1  194.58   11.70
   5  -2  -1  189.38   11.90
  -5  -2   1  198.18   10.90
   5  -2  -1  178.98   11.70
  -5   2   1  192.88   11.80
   5   2  -1  177.58   11.30
  -5   2   1  193.18   11.50
   5   2  -1  187.38   11.50
   5   2  -1  184.08   10.90
  -5   2   1  176.38   11.10
  -5   2   1  193.38   11.30
   5   2  -1  175.28   11.50
  -4  -2   1   96.09    6.00
   4  -2  -1   82.19    6.10
   4  -2  -1   87.69    6.30
  -4  -2   1   98.89    6.10
   4  -2  -1   99.89    6.40
   4  -2  -1  100.09    6.30
   4  -2  -1   89.99    5.90
   4  -2  -1   91.29    5.90
  -4  -2   1   95.89    5.70
  -4   2   1   93.19    5.40
  -4   2   1   94.59    5.80
   4   2  -1   92.79    6.20
  -4   2   1   99.79    6.20
   4   2  -1   88.29    5.90
  -4   2   1   97.29    5.90
   4   2  -1   87.99    5.70
   4   2  -1   86.29    6.10
   3  -2  -1 3070.99  160.08
  -3  -2   1 2631.44  159.98
   3  -2  -1 2767.12  159.88
   3  -2  -1 2773.12  160.08
   3  -2  -1 2818.12  160.18
   3  -2  -1 2758.92  159.78
  -3  -2   1 3014.10  159.48
  -3  -2   1 2944.91  159.78
  -3  -2   1 2929.11  159.68
  -3  -2   1 2932.21  159.98
   3  -2  -1 2846.52  160.08
   3   2  -1 2791.92  159.98
  -3   2   1 3177.98  160.18
  -3   2   1 2716.43  160.08
  -3   2   1 2957.00  159.78
   3   2  -1 2628.34  159.78
   3   2  -1 2823.22  159.68
   3   2  -1 2680.33  159.98
  -3   2   1 3035.20  160.18
   2  -2  -1 1868.41  102.69
   2  -2  -1 1810.22  102.89
  -2  -2   1 1804.02  102.69
   2  -2  -1 1824.32  102.79
   2  -2  -1 1959.00  103.29
  -2  -2   1 1782.02  102.89
  -2  -2   1 1925.31  102.89
  -2  -2   1 1848.52  102.59
  -2   2   1 2017.50  102.99
  -2   2   1 1824.32  102.89
   2   2  -1 1658.23  102.59
   2   2  -1 1770.72  102.99
   2   2  -1 1781.32  102.69
   2   2  -1 1873.21  102.89
  -2   2   1 1923.41  102.79
  -2   2   1 1734.03  102.79
   2   2  -1 1798.22  102.89
   1  -2  -1  190.38   11.50
   1  -2  -1  190.28   11.30
   1  -2  -1  205.88   11.30
  -1  -2   1  202.58   11.40
  -1  -2   1  190.68   11.40
  -1  -2   1  204.98   11.30
   1  -2  -1  189.68   11.30
  -1  -2   1  186.38   11.30
  -1  -2   1  198.48   11.40
   1  -2  -1  198.28   11.50
   1  -2  -1  191.48   11.40
   1   2  -1  206.18   11.40
  -1   2   1  193.08   11.30
  -1   2   1  207.38   11.50
   1   2  -1  185.98   11.40
  -1   2   1  199.88   11.40
  -1   2   1  198.68   11.30
  -1   2   1  203.18   11.60
   1   2  -1  186.18   11.40
   1   2  -1  187.98   11.30
  -1   2   1  203.28   11.30
   0  -2   1  587.44   32.20
   0  -2  -1  588.34   32.20
   0  -2   1  549.85   32.20
   0  -2   1  534.55   32.20
   0  -2  -1  600.14   32.10
   0  -2  -1  564.34   32.10
   0  -2   1  575.54   32.30
   0  -2  -1  572.74   32.10
   0  -2  -1  595.74   32.40
   0   2  -1  536.85   32.20
   0   2  -1  587.14   32.20
   0   2  -1  599.44   32.10
   0   2  -1  585.94   32.20
   0   2  -1  557.94   32.30
   0   2  -1  561.54   32.10
   0   2  -1  540.45   32.10
  -1  -2  -1 2860.91  142.69
   1   2   1 2628.04  142.99
   1   2   1 2575.44  142.69
  -1   2  -1 2278.07  142.99
   1   2   1 2438.86  142.69
   1   2   1 2548.95  142.69
  -2  -2  -1  129.69    7.10
   2  -2   1  112.49    7.40
   2  -2   1  126.09    7.70
   2  -2   1  142.79    8.10
   2  -2   1  113.19    7.00
   2  -2   1  116.89    7.20
   2  -2   1  108.59    7.10
   2   2   1  113.19    7.50
   2   2   1  113.19    7.00
  -2   2  -1  127.89    7.10
   2   2   1  106.99    7.00
  -2   2  -1  126.39    7.50
   2   2   1  116.69    7.00
  -2   2  -1  125.29    7.10
   3  -2   1    1.00    1.00
   3  -2   1    0.60    0.80
   3  -2   1    2.20    1.20
   3  -2   1    0.90    0.40
  -3  -2  -1    2.50    0.80
   3  -2   1    1.00    0.50
   3  -2   1    1.60    0.90
   3  -2   1    1.90    0.80
  -3   2  -1    1.70    0.90
  -3   2  -1    1.20    1.00
   3   2   1    2.20    0.70
   3   2   1    0.80    0.60
  -3   2  -1    0.60    0.60
   3   2   1    1.10    0.60
   4  -2   1  315.97   18.40
   4  -2   1  308.47   19.20
   4  -2   1  358.66   19.60
   4  -2   1  309.27   18.80
  -4  -2  -1  349.27   18.90
   4  -2   1  317.57   18.90
   4  -2   1  322.67   18.80
   4   2   1  299.17   18.30
  -4   2  -1  358.26   19.40
   4   2   1  321.27   18.70
  -4   2  -1  277.07   19.30
  -4   2  -1  334.17   19.00
  -4   2  -1  354.86   18.50
   4   2   1  313.07   18.50
   4   2   1  299.87   18.60
   5  -2   1  153.48    8.90
  -5  -2  -1  148.69    9.50
   5  -2   1  152.98    9.30
   5  -2   1  142.39    9.80
   5  -2   1  155.98    9.60
   5  -2   1  133.89    9.30
   5  -2   1  152.48   10.20
  -5   2  -1  157.58    8.90
   5   2   1  140.69    9.30
   5   2   1  138.89    9.20
  -5   2  -1  157.98   10.00
   5   2   1  148.89    8.80
   5   2   1  155.98   10.20
  -5   2  -1  148.79    9.50
   5   2   1  149.88    8.70
   6  -2   1    3.10    1.40
   6  -2   1    2.80    1.30
  -6  -2  -1    3.90    1.40
   6  -2   1    4.70    1.30
   6  -2   1    6.30    1.90
   6  -2   1    5.20    1.20
   6  -2   1    3.30    1.50
   6   2   1    5.10    1.40
   6   2   1    3.50    1.60
  -6   2  -1    4.10    1.40
   6   2   1    4.40    1.40
   6   2   1    4.40    0.80
   6   2   1    4.70    1.50
  -6   2  -1    4.90    1.80
   6   2   1    3.90    0.90
   7  -2   1  479.45   29.50
   7  -2   1  489.45   27.80
  -7  -2  -1  492.55   28.60
   7  -2   1  505.75   28.50
   7  -2   1  462.95   28.60
   7  -2   1  446.66   28.70
   7  -2   1  509.15   28.00
  -7   2  -1  473.35   28.30
   7   2   1  478.85   29.40
   7   2   1  476.45   28.30
   7   2   1  473.05   28.30
   7   2   1  496.65   28.20
  -7   2  -1  478.25   29.00
  -8  -2  -1  765.62   47.40
   8  -2   1  814.52   47.70
   8  -2   1  917.01   47.60
   8  -2   1  749.53   47.60
   8  -2   1  852.61   48.70
   8  -2   1  802.62   47.40
   8  -2   1  838.92   46.80
   8   2   1  854.71   47.30
   8   2   1  847.02   48.70
   8   2   1  863.01   46.10
   8   2   1  847.92   47.20
   8   2   1  738.53   47.00
  -8   2  -1  795.82   47.10
  -8   2  -1  754.62   47.80
  -9  -2  -1  217.78   15.20
   9  -2   1  226.68   14.30
   9  -2   1  246.18   15.50
   9  -2   1  225.58   16.10
   9  -2   1  251.47   14.50
   9  -2   1  239.18   15.50
   9  -2   1  217.48   15.00
   9   2   1  232.98   14.80
  -9   2  -1  233.28   15.70
   9   2   1  220.88   14.80
   9   2   1  266.27   16.70
   9   2   1  253.67   15.10
  -9   2  -1  225.08   14.80
 -10  -2  -1  783.12   49.30
  10  -2   1  785.12   49.40
  10  -2   1  827.72   50.59
  10  -2   1  902.31   48.30
  10  -2   1  863.31   48.40
  10  -2   1  856.31   49.30
  10   2   1  886.81   49.10
  10   2   1  899.01   49.10
  10   2   1  822.92   48.80
 -10   2  -1  774.32   48.70
  11  -2   1  373.16   24.30
  11  -2   1  386.76   24.20
  11  -2   1  404.36   23.10
  11  -2   1  391.16   23.20
  11   2   1  367.56   23.60
  11   2   1  360.26   24.60
  11   2   1  410.76   24.10
  12  -2   1  163.28   12.10
  12  -2   1  174.68   10.80
  12  -2   1  157.68   11.90
  12  -2   1  159.18   10.90
  12   2   1  164.48   11.70
  12   2   1  156.88   11.50
  12   2   1  150.58   11.30
  13  -2   1    0.70    1.40
  13  -2   1   -0.30    1.70
  13  -2   1   -0.60    2.70
  13  -2   1   -0.10    2.10
  13   2   1    1.20    1.90
  13   2   1    3.70    2.30
  14  -2   1  193.38   14.70
  14  -2   1  182.18   13.30
  14  -2   1  206.38   13.00
  14  -2   1  222.28   15.00
  14   2   1  182.98   13.90
  14   2   1  218.18   14.70
  15  -2   1  107.99    9.80
  15  -2   1  104.69    9.90
  15   2   1  129.09   10.20
  15   2   1  112.09    9.40
  15   2   1  114.49   12.40
  16  -2   1   19.10    4.30
  16  -2   1   12.40    3.60
  16   2   1   17.00    3.80
  16   2   1   12.80    3.70
  16   2   1    7.90    4.50
  17  -2   1   29.80    5.50
  17  -2   1   40.10    6.20
  17   2   1   44.50    6.40
  17   2   1   33.80    5.40
  17   2   1   30.90    8.00
  18  -2   1   63.59    7.60
  18  -2   1   65.89    7.60
  18   2   1   48.90   11.30
  18   2   1   56.69    7.60
  18   2   1   55.19    7.30
  19   3  -1   81.69    9.40
  18  -3  -1   -0.30    3.00
  18  -3  -1    2.50    3.00
  18   3  -1    4.10    4.60
  18   3  -1    1.40    2.60
  18   3  -1    7.50    3.50
  17  -3  -1   28.30    5.40
  17  -3  -1   43.20    7.00
  17   3  -1   34.70    6.40
  17   3  -1   48.10    6.50
  17   3  -1   29.40    8.30
  16  -3  -1   -0.20    2.20
  16  -3  -1    2.40    2.80
  16   3  -1   -8.60    3.40
  16   3  -1    1.30    2.30
  16   3  -1   -0.80    2.50
  15  -3  -1   16.30    4.50
  15  -3  -1   22.10    4.70
  15   3  -1   13.80    9.40
  15   3  -1   17.50    3.80
  15   3  -1   13.50    4.10
  14  -3  -1  197.18   14.90
  14  -3  -1  193.38   15.10
  14   3  -1  215.88   15.20
  14   3  -1  224.18   17.30
  14   3  -1  201.18   14.40
  13  -3  -1   10.90    2.60
  13  -3  -1    4.00    2.80
  13  -3  -1   14.20    3.60
  13  -3  -1    9.00    2.40
  13   3  -1    7.70    3.90
  13   3  -1   10.90    3.00
  13   3  -1    6.20    2.50
 -13   3   1   11.20    2.70
  12  -3  -1  136.09   10.40
  12  -3  -1  143.69    9.40
  12  -3  -1  118.09    9.30
  12   3  -1  126.69   10.20
  12   3  -1  134.79   11.40
  12   3  -1  135.19    9.80
 -12   3   1  120.59    9.30
  11  -3  -1  634.74   40.70
  11  -3  -1  746.53   39.80
 -11  -3   1  667.03   41.30
  11  -3  -1  624.24   40.50
  11  -3  -1  708.03   40.00
  11   3  -1  644.24   40.50
  11   3  -1  689.63   40.40
 -11   3   1  654.73   39.10
  11   3  -1  770.02   40.40
 -11   3   1  655.63   39.80
 -10  -3   1   78.79    5.40
  10  -3  -1   69.89    6.80
  10  -3  -1   68.39    6.60
  10  -3  -1   79.99    6.00
 -10  -3   1   70.39    6.20
  10  -3  -1   78.39    6.00
  10  -3  -1   87.19    7.40
 -10  -3   1   71.19    5.20
  10   3  -1   72.79    6.20
  10   3  -1   85.79    7.50
 -10   3   1   67.59    5.50
 -10   3   1   74.89    6.00
  10   3  -1   69.49    6.50
  10   3  -1   80.89    6.30
   9  -3  -1  275.77   17.80
  -9  -3   1  257.27   16.00
   9  -3  -1  277.87   16.50
   9  -3  -1  289.67   17.50
   9  -3  -1  230.38   16.90
  -9  -3   1  270.47   16.00
   9  -3  -1  272.87   16.40
   9  -3  -1  253.47   17.10
  -9  -3   1  248.08   16.80
  -9   3   1  274.47   16.40
  -9   3   1  260.67   17.40
   9   3  -1  269.47   16.80
   9   3  -1  285.97   16.70
  -9   3   1  257.17   16.40
   9   3  -1  273.97   17.10
   8  -3  -1   28.50    4.00
   8  -3  -1   33.60    3.70
   8  -3  -1   41.60    4.90
  -8  -3   1   32.80    3.10
  -8  -3   1   29.50    3.40
   8  -3  -1   37.00    3.40
  -8  -3   1   34.20    3.20
   8  -3  -1   34.60    3.30
   8   3  -1   30.90    3.30
   8   3  -1   39.50    3.80
  -8   3   1   33.70    3.50
  -8   3   1   30.00    3.40
   8   3  -1   29.20    3.70
   8   3  -1   39.20    2.80
  -8   3   1   33.80    3.90
   7  -3  -1   55.79    4.70
   7  -3  -1   54.19    4.90
  -7  -3   1   58.89    4.30
   7  -3  -1   57.79    4.30
   7  -3  -1   50.99    4.90
  -7  -3   1   53.99    4.30
   7  -3  -1   54.69    4.20
   7  -3  -1   43.80    4.60
  -7  -3   1   53.19    4.40
  -7   3   1   55.69    4.40
   7   3  -1   48.70    4.20
  -7   3   1   53.99    4.10
   7   3  -1   50.19    4.50
  -7   3   1   55.69    5.00
   7   3  -1   52.69    4.60
  -7   3   1   51.09    4.30
   7   3  -1   60.59    3.90
   6  -3  -1   52.39    3.80
   6  -3  -1   41.00    4.10
  -6  -3   1   46.30    3.80
   6  -3  -1   49.99    4.40
   6  -3  -1   46.60    4.10
  -6  -3   1   46.60    3.40
   6  -3  -1   42.80    4.10
   6  -3  -1   43.40    3.60
  -6  -3   1   45.00    3.80
  -6  -3   1   47.90    3.80
  -6   3   1   48.90    4.00
   6   3  -1   49.80    3.50
  -6   3   1   47.30    3.60
  -6   3   1   51.09    4.40
   6   3  -1   45.50    3.70
   6   3  -1   45.80    4.10
  -6   3   1   48.90    3.90
   6   3  -1   45.90    4.10
  -5  -3   1 1796.92   94.89
  -5  -3   1 1606.64   94.79
   5  -3  -1 1611.54   94.79
   5  -3  -1 1752.92   95.29
  -5  -3   1 1792.02   94.99
  -5  -3   1 1761.62   94.59
   5  -3  -1 1585.74   95.29
   5  -3  -1 1683.03   95.29
   5  -3  -1 1500.65   95.09
   5  -3  -1 1706.73   94.79
  -5   3   1 1811.02   95.19
  -5   3   1 1704.63   95.39
   5   3  -1 1634.64   94.79
   5   3  -1 1683.03   94.59
   5   3  -1 1701.23   95.09
   5   3  -1 1621.04   95.09
  -5   3   1 1687.83   94.59
   4  -3  -1  200.78   12.30
  -4  -3   1  189.18   12.40
   4  -3  -1  194.58   12.30
  -4  -3   1  220.78   12.50
  -4  -3   1  219.48   12.30
   4  -3  -1  196.48   12.70
   4  -3  -1  184.28   12.60
   4  -3  -1  222.28   12.70
  -4  -3   1  202.78   12.10
  -4   3   1  223.88   11.90
  -4   3   1  228.38   12.90
  -4   3   1  209.48   12.20
   4   3  -1  199.98   12.20
  -4   3   1  183.38   12.50
   4   3  -1  201.88   12.60
  -4   3   1  232.68   12.70
   4   3  -1  202.88   12.20
  -4   3   1  218.28   12.40
   3  -3  -1 2451.75  123.69
   3  -3  -1 2188.18  123.89
  -3  -3   1 2363.56  123.69
   3  -3  -1 2109.19  123.49
  -3  -3   1 2281.07  123.39
   3  -3  -1 2236.38  123.79
  -3  -3   1 2079.99  123.39
  -3  -3   1 2031.40  123.59
   3  -3  -1 2070.39  123.69
   3  -3  -1 2143.69  123.49
  -3   3   1 2386.46  123.59
  -3   3   1 2142.39  123.59
  -3   3   1 2271.87  123.29
  -3   3   1 2389.16  123.89
   3   3  -1 2297.77  123.79
   3   3  -1 2127.69  123.39
   3   3  -1 2111.29  123.69
  -3   3   1 2266.27  123.49
   3   3  -1 2091.79  123.39
  -3   3   1 2389.86  123.89
   3   3  -1 2082.29  123.89
  -3   3   1 1987.80  123.59
  -2  -3   1  583.24   35.10
   2  -3  -1  592.24   35.30
   2  -3  -1  630.94   35.40
  -2  -3   1  695.73   35.00
   2  -3  -1  637.44   35.10
   2  -3  -1  605.44   35.30
  -2  -3   1  645.14   35.50
  -2  -3   1  626.74   35.00
   2  -3  -1  593.44   35.20
   2  -3  -1  675.93   35.30
  -2  -3   1  644.44   35.30
  -2  -3   1  592.14   35.30
   2  -3  -1  589.84   35.40
  -2   3   1  609.54   35.30
   2   3  -1  588.54   35.10
  -2   3   1  650.53   35.30
  -2   3   1  672.63   35.50
   2   3  -1  663.53   35.40
  -2   3   1  580.74   35.10
  -2   3   1  620.44   35.30
  -2   3   1  625.84   35.20
   2   3  -1  588.44   35.00
   2   3  -1  600.64   35.30
   2   3  -1  593.84   35.40
   1  -3  -1 1371.96   75.79
   1  -3  -1 1236.98   75.79
   1  -3  -1 1388.86   75.59
  -1  -3   1 1439.36   75.79
  -1  -3   1 1320.17   75.79
   1  -3  -1 1342.67   75.89
   1  -3  -1 1248.78   75.59
  -1  -3   1 1393.06   75.59
  -1  -3   1 1311.27   75.69
   1   3  -1 1364.46   75.69
  -1   3   1 1420.76   75.89
   1   3  -1 1367.96   75.69
  -1   3   1 1402.16   75.69
  -1   3   1 1260.47   75.59
   1   3  -1 1374.46   75.79
   1   3  -1 1336.67   75.69
   0  -3   1   47.00    3.80
   0  -3   1   53.09    3.80
   0  -3  -1   56.99    3.80
   0  -3  -1   59.69    3.70
   0  -3  -1   63.29    3.40
   0  -3   1   55.29    3.70
   0  -3   1   59.09    3.70
   0  -3   1   57.09    3.80
   0  -3  -1   55.99    3.70
   0  -3  -1   59.39    4.10
   0  -3  -1   56.39    3.60
   0  -3   1   55.69    3.70
   0   3  -1   60.49    3.80
   0   3   1   57.89    3.70
   0   3  -1   59.19    3.70
   0   3  -1   53.99    3.90
   0   3   1   59.99    3.80
   0   3   1   53.09    3.40
   0   3  -1   55.99    3.70
   0   3   1   54.39    3.70
   0   3   1   51.39    3.50
   0   3  -1   55.09    3.70
   0   3  -1   58.39    3.60
   1  -3   1 1267.57   75.09
   1  -3   1 1426.76   75.29
   1  -3   1 1316.17   75.09
   1  -3   1 1283.37   74.99
  -1  -3  -1 1296.47   74.99
   1  -3   1 1301.87   75.09
   1  -3   1 1296.07   74.89
  -1  -3  -1 1394.66   74.99
  -1  -3  -1 1399.56   75.19
  -1  -3  -1 1383.36   74.89
   1   3   1 1269.17   74.99
  -1   3  -1 1236.48   75.09
   1   3   1 1302.07   74.89
  -1   3  -1 1426.56   75.09
   1   3   1 1299.17   74.99
   1   3   1 1288.37   75.19
  -1   3  -1 1405.46   75.29
  -1   3  -1 1341.37   74.99
  -1   3  -1 1389.66   74.89
  -1   3  -1 1430.16   74.79
   2  -3   1 1529.55   85.69
   2  -3   1 1480.15   85.89
  -2  -3  -1 1587.64   85.29
   2  -3   1 1571.74   85.89
  -2  -3  -1 1625.34   85.89
  -2  -3  -1 1624.44   85.29
   2  -3   1 1471.45   85.39
  -2  -3  -1 1613.24   85.19
   2  -3   1 1473.65   85.59
   2  -3   1 1515.25   85.29
  -2   3  -1 1348.07   85.79
   2   3   1 1456.35   85.39
  -2   3  -1 1626.04   85.39
   2   3   1 1442.26   85.09
  -2   3  -1 1650.13   85.49
   2   3   1 1482.65   85.79
  -2   3  -1 1463.15   85.39
   2   3   1 1485.45   85.39
   2   3   1 1415.46   85.09
  -2   3  -1 1608.64   85.79
   3  -3   1 1245.28   73.19
  -3  -3  -1 1435.56   73.19
   3  -3   1 1297.97   73.69
   3  -3   1 1257.47   73.59
  -3  -3  -1 1456.85   73.39
   3  -3   1 1259.17   73.59
   3  -3   1 1424.46   74.19
  -3   3  -1 1136.99   73.99
   3   3   1 1237.48   73.29
   3   3   1 1244.08   73.39
   3   3   1 1242.68   73.39
  -3   3  -1 1404.26   73.49
  -3   3  -1 1367.06   73.89
  -3   3  -1 1385.36   73.39
   3   3   1 1279.67   73.49
   3   3   1 1236.68   73.99
   4  -3   1  418.36   25.20
   4  -3   1  438.36   25.80
  -4  -3  -1  469.05   25.70
   4  -3   1  433.06   25.80
   4  -3   1  453.85   26.40
   4  -3   1  419.16   25.80
  -4   3  -1  470.45   25.50
  -4   3  -1  470.65   25.40
  -4   3  -1  462.55   26.00
   4   3   1  439.96   25.50
   4   3   1  418.56   25.60
  -4   3  -1  484.35   26.50
   4   3   1  425.56   25.50
   5  -3   1   19.60    2.30
  -5  -3  -1   19.90    2.30
   5  -3   1   18.80    2.80
   5  -3   1   21.80    2.40
   5  -3   1   19.00    1.80
   5  -3   1   20.80    2.70
  -5   3  -1   29.80    3.60
  -5   3  -1   23.20    2.70
   5   3   1   18.80    2.20
   5   3   1   19.30    2.10
   5   3   1   18.80    1.90
  -5   3  -1   14.90    2.70
  -5   3  -1   22.30    2.00
   6  -3   1  494.35   29.50
   6  -3   1  448.86   29.60
   6  -3   1  513.15   28.70
  -6  -3  -1  530.15   29.30
   6  -3   1  495.45   29.40
   6  -3   1  456.75   29.00
   6  -3   1  500.55   30.20
  -6   3  -1  508.75   29.40
  -6   3  -1  502.15   30.00
   6   3   1  520.65   28.60
   6   3   1  514.65   29.10
   6   3   1  516.65   29.10
  -6   3  -1  515.85   28.70
   6   3   1  500.95   29.40
   7  -3   1  416.36   24.00
   7  -3   1  341.87   24.00
   7  -3   1  406.46   23.10
   7  -3   1  401.26   24.00
   7  -3   1  429.76   25.90
   7  -3   1  408.36   23.50
  -7  -3  -1  378.86   23.70
   7   3   1  385.96   23.80
   7   3   1  401.36   24.80
  -7   3  -1  382.66   23.80
  -7   3  -1  385.76   22.80
   7   3   1  407.66   23.60
   7   3   1  420.36   23.60
  -7   3  -1  414.26   24.60
   7   3   1  407.26   22.90
   8  -3   1  526.95   28.30
   8  -3   1  489.25   29.80
   8  -3   1  432.06   29.00
   8  -3   1  485.65   27.90
   8  -3   1  480.05   28.90
   8  -3   1  500.65   28.90
  -8  -3  -1  488.55   28.80
   8   3   1  508.85   28.50
   8   3   1  495.15   30.00
   8   3   1  490.15   28.60
  -8   3  -1  460.25   29.40
   8   3   1  494.75   27.50
   8   3   1  421.46   28.30
  -8   3  -1  471.55   28.60
   9  -3   1  445.06   26.90
   9  -3   1  443.46   27.60
   9  -3   1  448.56   28.70
   9  -3   1  462.65   27.80
   9  -3   1  416.36   27.80
   9  -3   1  497.65   27.20
  -9  -3  -1  433.56   27.50
   9   3   1  472.25   27.40
  -9   3  -1  449.06   27.40
   9   3   1  501.95   27.40
   9   3   1  446.06   27.30
  10  -3   1  270.97   18.30
  10  -3   1  250.57   17.20
  10  -3   1  278.67   16.00
  10  -3   1  272.37   17.10
  10  -3   1  269.27   16.10
 -10  -3  -1  228.98   16.70
 -10   3  -1  241.28   16.50
  10   3   1  277.57   16.90
  10   3   1  254.47   16.50
  11  -3   1   62.19    6.40
  11  -3   1   68.29    6.70
  11  -3   1   76.49    5.60
  11  -3   1   62.79    5.20
  11   3   1   75.29    6.40
  11   3   1   65.89    7.50
  11   3   1   60.79    5.80
  11   3   1   57.99    5.80
 -11   3  -1   71.19    6.10
  12  -3   1   59.79    5.10
  12  -3   1   57.09    8.20
  12  -3   1   65.49    6.60
  12  -3   1   61.79    5.30
  12  -3   1   56.89    6.30
  12   3   1   57.09    6.00
  12   3   1   54.19    5.70
  13  -3   1  406.86   24.40
  13  -3   1  394.16   25.90
  13  -3   1  410.16   25.90
  13  -3   1  421.46   24.40
  13   3   1  416.46   25.20
  13   3   1  410.96   25.50
  13   3   1  343.27   27.10
  14  -3   1    1.40    2.60
  14  -3   1    2.50    2.60
  14  -3   1    3.50    1.70
  14  -3   1    0.50    1.80
  14   3   1    0.40    3.80
  14   3   1    1.00    1.90
  14   3   1    4.20    2.50
  15  -3   1  170.98   13.30
  15  -3   1  160.48   11.40
  15  -3   1  191.78   13.60
  15   3   1  169.78   12.50
  15   3   1  160.58   12.90
  15   3   1  156.48   15.10
  16  -3   1    0.60    2.30
  16  -3   1    1.30    2.30
  16   3   1    3.10    2.70
  16   3   1    4.80    4.70
  16   3   1    1.50    2.30
  17  -3   1   31.00    5.90
  17  -3   1   32.00    5.40
  17   3   1   26.40    7.70
  17   3   1   35.20    6.20
  17   3   1   31.90    5.10
  18  -3   1    1.80    3.30
  18  -3   1   -0.10    2.50
  18   3   1   -1.10    2.60
  18   3   1    3.10    3.20
  18  -4  -1   41.10    6.80
  18  -4  -1   40.60    7.00
  18   4  -1   26.20    5.30
  18   4  -1   52.49    7.30
  18   4  -1   38.70    8.50
  17  -4  -1   38.70    6.30
  17  -4  -1   30.00    6.10
  17   4  -1   38.90    6.50
  17   4  -1   50.89    9.30
  16  -4  -1    0.50    2.00
  16  -4  -1   -3.30    2.20
  16   4  -1    3.70    2.60
  16   4  -1   -0.50    2.50
  16   4  -1   -2.80    4.00
  15  -4  -1   57.49    7.10
  15  -4  -1   72.09    7.80
  15   4  -1   74.59   12.10
  15   4  -1   56.59    7.80
  15   4  -1   69.89    6.90
  14  -4  -1  314.47   21.40
  14  -4  -1  330.37   20.20
  14  -4  -1  307.37   21.70
  14  -4  -1  310.97   20.10
  14   4  -1  319.07   20.60
  14   4  -1  337.27   21.60
 -14   4   1  288.87   20.20
  14   4  -1  346.17   23.70
  13  -4  -1    1.50    2.10
  13  -4  -1    1.70    1.70
  13  -4  -1   -0.80    1.70
  13  -4  -1    5.20    2.40
 -13   4   1    1.40    2.30
  13   4  -1   -0.40    1.80
  13   4  -1    2.40    2.20
  13   4  -1    3.20    3.40
  12  -4  -1    1.00    2.10
  12  -4  -1    3.40    2.00
  12  -4  -1   -1.20    1.50
  12  -4  -1    0.40    1.50
  12   4  -1   -0.20    1.70
  12   4  -1    2.10    2.30
  12   4  -1    2.10    3.10
 -12   4   1   -0.20    1.00
  11  -4  -1    3.50    1.50
  11  -4  -1    3.30    1.90
  11  -4  -1    2.20    1.70
  11  -4  -1    4.00    2.20
  11  -4  -1    4.00    2.40
 -11  -4   1    1.80    1.50
  11   4  -1    0.30    1.90
  11   4  -1    0.70    3.10
 -11   4   1    3.70    1.90
  11   4  -1    3.00    1.60
 -11   4   1    2.40    1.30
  10  -4  -1    4.30    1.60
  10  -4  -1    2.70    2.10
  10  -4  -1    5.30    2.30
 -10  -4   1    3.10    1.30
  10  -4  -1    0.70    1.60
  10  -4  -1    1.20    2.10
 -10  -4   1    3.30    1.10
  10   4  -1    4.30    2.10
  10   4  -1    4.10    1.70
  10   4  -1    1.30    2.60
 -10   4   1    3.20    1.80
  10   4  -1    4.10    1.80
   9  -4  -1 1113.69   60.49
   9  -4  -1 1043.10   61.19
   9  -4  -1  899.11   60.99
  -9  -4   1 1064.19   59.99
  -9  -4   1 1024.20   60.79
   9  -4  -1 1127.29   61.59
   9  -4  -1 1117.29   61.89
  -9  -4   1 1117.09   59.99
   9  -4  -1 1097.59   60.49
  -9   4   1  974.20   60.49
   9   4  -1 1050.49   63.49
   9   4  -1 1074.59   59.79
   9   4  -1 1062.29   60.99
  -9   4   1 1026.40   60.29
  -9   4   1 1016.30   61.49
   9   4  -1 1145.39   60.69
   9   4  -1  993.10   60.89
   8  -4  -1   65.99    5.70
  -8  -4   1   71.59    5.10
   8  -4  -1   73.19    6.10
  -8  -4   1   69.79    5.40
   8  -4  -1   71.09    5.30
  -8  -4   1   63.39    4.90
   8   4  -1   67.19    5.20
   8   4  -1   64.79    4.70
  -8   4   1   62.39    4.90
  -8   4   1   64.99    5.30
   8   4  -1   68.39    5.60
   8   4  -1   55.69    6.30
  -8   4   1   68.19    5.90
   8   4  -1   64.59    5.70
  -8   4   1   67.49    5.20
   7  -4  -1   23.00    3.10
  -7  -4   1   23.70    2.60
  -7  -4   1   20.80    2.40
   7  -4  -1   16.20    2.80
   7  -4  -1   20.50    2.80
   7  -4  -1   26.90    2.70
  -7  -4   1   25.60    2.70
   7  -4  -1   19.80    3.20
   7  -4  -1   25.40    3.40
  -7   4   1   22.40    3.00
   7   4  -1   30.30    3.60
   7   4  -1   23.90    2.40
   7   4  -1   20.00    2.50
   7   4  -1   20.30    3.60
  -7   4   1   24.30    3.50
  -7   4   1   21.70    2.60
  -7   4   1   24.10    2.40
   7   4  -1   23.10    3.10
  -6  -4   1  415.16   23.70
  -6  -4   1  400.06   23.70
   6  -4  -1  429.36   24.40
  -6  -4   1  412.56   23.50
   6  -4  -1  420.26   23.70
   6  -4  -1  357.06   24.10
   6  -4  -1  397.86   24.10
   6  -4  -1  395.86   23.70
   6  -4  -1  390.16   24.30
  -6  -4   1  426.76   23.70
   6   4  -1  427.96   23.50
  -6   4   1  429.66   23.40
   6   4  -1  373.16   23.50
  -6   4   1  429.56   23.90
   6   4  -1  356.06   24.50
   6   4  -1  390.26   24.00
  -6   4   1  397.56   24.40
   6   4  -1  426.26   24.20
   5  -4  -1   79.89    5.60
  -5  -4   1   78.39    5.10
   5  -4  -1   60.09    5.50
  -5  -4   1   75.29    5.30
  -5  -4   1   71.19    5.00
   5  -4  -1   80.99    5.70
   5  -4  -1   77.99    5.30
  -5  -4   1   70.39    5.30
   5  -4  -1   69.39    5.20
   5  -4  -1   75.59    5.80
  -5   4   1   78.29    5.80
  -5   4   1   84.09    5.60
   5   4  -1   71.29    5.50
  -5   4   1   78.69    4.90
   5   4  -1   76.19    5.60
   5   4  -1   68.29    5.00
   5   4  -1   71.89    5.00
  -5   4   1   84.49    5.50
  -5   4   1   72.19    5.60
  -5   4   1   80.69    4.70
  -4  -4   1  165.98    9.30
   4  -4  -1  147.69    9.50
   4  -4  -1  136.69    9.70
   4  -4  -1  156.68    9.70
  -4  -4   1  151.58    9.30
   4  -4  -1  148.89    9.40
  -4  -4   1  156.28    9.60
   4  -4  -1  149.29    9.90
   4  -4  -1  165.88    9.80
  -4  -4   1  141.89    9.50
  -4   4   1  143.39    9.60
  -4   4   1  162.88    9.80
   4   4  -1  149.99    9.30
   4   4  -1  141.69   10.00
  -4   4   1  154.08    9.20
   4   4  -1  165.78    9.80
  -4   4   1  149.39    9.60
   4   4  -1  151.08    9.70
  -4   4   1  173.88   10.00
  -4   4   1  162.08    9.10
   4   4  -1  145.79    9.20
  -3  -4   1  438.66   27.70
   3  -4  -1  420.36   27.80
  -3  -4   1  535.95   27.20
   3  -4  -1  466.05   27.80
   3  -4  -1  445.56   27.60
  -3  -4   1  505.25   27.80
  -3  -4   1  445.56   27.50
   3  -4  -1  478.75   28.00
  -3  -4   1  510.35   27.40
   3  -4  -1  535.45   27.70
   3  -4  -1  474.95   27.70
  -3  -4   1  537.35   28.20
  -3   4   1  509.65   28.00
   3   4  -1  434.06   28.00
   3   4  -1  498.35   27.90
   3   4  -1  452.75   27.40
  -3   4   1  489.35   27.70
   3   4  -1  464.35   27.60
  -3   4   1  506.15   27.50
  -3   4   1  489.25   27.60
  -3   4   1  513.55   28.00
  -3   4   1  511.55   27.70
  -3   4   1  449.56   27.80
   3   4  -1  461.55   27.80
   2  -4  -1 4518.45  251.77
  -2  -4   1 4339.97  251.57
  -2   4   1 4338.27  251.27
   2   4  -1 4311.97  251.57
  -2   4   1 4970.00  251.67
   2   4  -1 4469.05  251.27
  -2   4   1 4367.56  251.57
   2   4  -1 4684.53  251.57
  -1  -4   1  104.49    7.10
  -1  -4   1  103.19    7.00
  -1  -4   1  125.39    7.10
   1  -4  -1  117.29    7.20
   1  -4  -1  116.59    6.90
   1  -4  -1  100.89    6.80
   1  -4  -1  123.89    7.00
   1  -4  -1  107.69    7.10
  -1  -4   1   98.19    6.90
  -1   4   1  113.29    7.00
  -1   4   1  108.99    6.90
  -1   4   1  116.79    6.80
   1   4  -1  115.89    7.10
   1   4  -1  109.09    7.00
   1   4  -1  110.09    6.90
   1   4  -1  109.99    7.10
  -1   4   1  105.19    6.80
  -1   4   1  107.19    7.10
   1   4  -1  115.39    7.00
   0  -4   1  813.92   43.00
   0  -4   1  679.93   42.90
   0  -4   1  751.12   42.90
   0  -4  -1  807.42   42.90
   0  -4   1  728.43   43.00
   0  -4  -1  833.62   42.60
   0  -4   1  745.63   42.90
   0  -4   1  707.53   42.90
   0  -4  -1  714.33   42.80
   0  -4  -1  807.02   43.00
   0  -4  -1  762.12   43.00
   0  -4  -1  800.72   43.30
   0   4   1  725.73   42.90
   0   4  -1  805.52   43.10
   0   4   1  719.53   43.20
   0   4   1  713.33   42.70
   0   4   1  807.12   43.10
   0   4   1  745.33   42.70
   0   4  -1  790.22   42.90
   0   4   1  762.62   43.00
   0   4   1  723.63   42.90
   0   4  -1  774.02   43.00
   0   4  -1  715.23   43.00
   0   4  -1  780.72   43.00
  -1  -4  -1   34.60    2.60
   1  -4   1   36.10    3.00
   1  -4   1   36.40    2.80
   1  -4   1   35.20    2.80
  -1  -4  -1   37.20    3.10
  -1  -4  -1   41.40    2.80
   1  -4   1   44.40    3.60
   1  -4   1   40.60    3.00
   1  -4   1   34.70    2.80
  -1  -4  -1   32.00    2.80
  -1   4  -1   37.90    2.70
   1   4   1   33.10    3.00
  -1   4  -1   39.20    2.90
   1   4   1   35.80    2.50
  -1   4  -1   42.60    3.20
   1   4   1   36.20    2.90
   1   4   1   35.20    3.00
   1   4   1   35.00    3.10
  -1   4  -1   38.70    2.90
   1   4   1   32.80    3.50
  -1   4  -1   39.90    3.00
   2  -4   1  881.01   48.60
  -2  -4  -1  959.20   49.20
  -2  -4  -1  917.71   48.60
   2  -4   1  834.12   48.90
   2  -4   1  752.52   48.90
   2  -4   1  846.12   48.70
   2  -4   1  859.51   49.20
   2  -4   1  919.01   48.90
  -2  -4  -1  856.51   48.60
  -2   4  -1  938.51   48.80
  -2   4  -1  834.32   48.60
  -2   4  -1  903.81   49.10
   2   4   1  843.62   49.00
   2   4   1  816.02   48.40
   2   4   1  839.72   48.80
   2   4   1  831.52   48.70
  -2   4  -1  799.52   49.00
   2   4   1  850.11   48.70
  -2   4  -1  908.61   48.70
   3  -4   1 1891.91  107.79
   3  -4   1 1862.41  108.19
  -3  -4  -1 1981.50  107.79
   3  -4   1 1919.21  107.99
   3  -4   1 2119.19  108.59
   3  -4   1 1864.31  108.19
  -3  -4  -1 2062.29  107.79
  -3  -4  -1 2063.39  107.69
   3  -4   1 1738.53  108.39
   3   4   1 1807.82  108.49
  -3   4  -1 1978.20  108.39
  -3   4  -1 1705.23  108.39
   3   4   1 1887.51  107.89
   3   4   1 1789.92  107.59
   3   4   1 1868.61  107.99
  -3   4  -1 2123.29  107.89
  -3   4  -1 1888.11  107.99
  -3   4  -1 2082.49  108.09
   4  -4   1  194.88   13.50
   4  -4   1  218.48   13.10
   4  -4   1  214.08   13.20
  -4  -4  -1  232.18   12.60
  -4  -4  -1  231.08   12.80
   4  -4   1  207.58   13.20
  -4  -4  -1  237.48   12.60
   4  -4   1  224.48   13.70
  -4   4  -1  228.18   12.70
  -4   4  -1  222.58   12.90
  -4   4  -1  217.78   13.40
   4   4   1  203.88   13.60
   4   4   1  212.28   12.90
   4   4   1  215.08   12.90
   4   4   1  212.78   12.90
   4   4   1  207.68   12.60
  -4   4  -1  191.18   13.50
   5  -4   1 2189.58  116.49
   5  -4   1 2102.89  117.39
   5  -4   1 1850.31  117.59
   5  -4   1 2068.59  117.29
  -5  -4  -1 2188.48  116.99
   5  -4   1 2034.00  117.19
   5  -4   1 2131.29  117.89
  -5   4  -1 2237.88  116.69
   5   4   1 2122.29  116.79
  -5   4  -1 2231.18  116.89
  -5   4  -1 2156.88  117.49
   5   4   1 2056.69  116.79
  -5   4  -1 1848.81  117.79
   5   4   1 2101.29  117.09
   5   4   1 1887.41  117.79
   6  -4   1  440.16   23.60
   6  -4   1  353.86   24.70
   6  -4   1  416.86   24.50
   6  -4   1  443.06   25.30
   6  -4   1  411.36   24.50
  -6  -4  -1  452.55   24.70
   6  -4   1  402.36   24.20
   6   4   1  397.86   23.90
   6   4   1  433.86   24.20
  -6   4  -1  439.96   24.60
  -6   4  -1  354.76   24.90
   6   4   1  415.36   24.60
   6   4   1  348.07   24.90
  -6   4  -1  433.86   23.90
   6   4   1  425.16   23.80
   7  -4   1  814.72   55.79
   7  -4   1  957.60   55.69
   7  -4   1 1005.70   55.79
   7  -4   1  999.00   54.79
  -7  -4  -1  961.90   55.39
   7  -4   1 1018.40   56.79
   7  -4   1  999.70   55.39
   7   4   1 1003.90   55.19
  -7   4  -1  925.21   55.59
   7   4   1  978.00   55.69
  -7   4  -1  958.60   54.79
   7   4   1  969.40   54.69
   7   4   1  991.60   55.39
   8  -4   1  206.18   14.00
  -8  -4  -1  197.58   12.80
   8  -4   1  166.68   13.10
   8  -4   1  194.18   13.00
   8  -4   1  195.68   12.00
   8  -4   1  202.38   13.10
   8  -4   1  212.58   12.60
  -8   4  -1  210.38   11.80
   8   4   1  204.48   13.00
  -8   4  -1  201.88   13.00
   8   4   1  201.48   11.80
   8   4   1  156.38   13.60
   8   4   1  190.18   12.70
   8   4   1  208.08   12.50
   8   4   1  206.08   14.00
   9  -4   1    0.50    1.20
   9  -4   1    0.90    1.30
  -9  -4  -1    0.40    1.20
   9  -4   1    0.40    1.60
   9  -4   1   -0.50    0.90
   9  -4   1   -2.30    1.40
   9   4   1   -2.90    1.90
   9   4   1    1.70    1.30
   9   4   1    0.80    0.90
   9   4   1   -0.10    0.70
   9   4   1    1.20    1.60
   9   4   1    0.20    1.40
  -9   4  -1    1.20    1.30
  10  -4   1   29.50    5.20
  10  -4   1   28.30    3.40
 -10  -4  -1   26.40    3.70
  10  -4   1   20.60    4.10
  10  -4   1   22.30    4.00
  10   4   1   24.10    3.80
  10   4   1   26.10    3.50
 -10   4  -1   22.30    3.50
  10   4   1   23.90    3.50
  10   4   1   21.40    4.80
  11  -4   1   87.29    7.80
  11  -4   1   86.49    6.50
  11  -4   1   96.89    7.00
  11  -4   1   92.69    8.20
 -11   4  -1   86.19    7.50
  11   4   1   87.29    7.00
  11   4   1   79.59    9.20
  11   4   1   94.29    9.00
  11   4   1   93.89    7.50
  12  -4   1  307.77   20.60
  12  -4   1  351.36   19.70
  12  -4   1  321.07   19.20
  12  -4   1  304.27   20.80
  12  -4   1  326.97   23.40
  12   4   1  319.67   20.40
  12   4   1  318.77   19.90
 -12   4  -1  303.57   20.00
  12   4   1  260.47   21.70
  13  -4   1   11.70    3.60
  13  -4   1    9.20    2.50
  13  -4   1    6.40    1.90
  13  -4   1    7.70    3.10
  13   4   1    7.90    2.60
  13   4   1    7.80    4.20
  13   4   1    6.70    2.70
  14  -4   1  272.27   17.40
  14  -4   1  279.37   19.10
  14  -4   1  255.97   18.80
  14   4   1  305.27   18.90
  14   4   1  248.48   20.50
  14   4   1  264.97   17.90
  15  -4   1  192.48   15.70
  15  -4   1  212.38   16.10
  15   4   1  218.18   15.00
  15   4   1  224.98   18.30
  15   4   1  217.68   15.60
  16  -4   1  145.39   12.30
  16  -4   1  140.59   12.10
  16   4   1  145.79   11.90
  16   4   1  138.49   14.40
  16   4   1  149.69   11.20
  17  -4   1   27.20    4.80
  17  -4   1   18.40    4.70
  17   4   1   25.50    4.90
  17   4   1   27.10    7.60
  17   4   1   26.00    5.20
  18  -4   1   29.70    5.90
  18  -4   1   22.90    5.60
  18   4   1   24.10   11.20
  18   4   1   34.50    5.80
  18   4   1   34.00    5.40
  18  -5  -1   20.00    4.90
  18  -5  -1   15.30    4.40
  18   5  -1   13.00    4.30
  18   5  -1    7.30    5.90
  18   5  -1   12.00    3.20
  17  -5  -1   12.50    6.60
  17  -5  -1   26.10    5.20
  17   5  -1   32.40    5.40
  17   5  -1   21.70    5.00
  17   5  -1   28.70    7.90
  16  -5  -1   -0.60    2.90
  16  -5  -1    7.10    2.90
  16   5  -1    1.70    2.30
  16   5  -1    7.20    3.30
  16   5  -1    6.30    4.70
  15  -5  -1  473.25   32.70
  15  -5  -1  494.35   33.20
  15  -5  -1  531.15   31.60
  15   5  -1  520.15   31.90
  15   5  -1  555.64   35.40
  15   5  -1  537.45   33.00
  14  -5  -1    1.00    2.50
  14  -5  -1   -4.70    1.60
  14  -5  -1    1.10    2.00
  14  -5  -1    0.50    2.00
  14   5  -1   -2.10    3.40
  14   5  -1    2.20    2.10
  14   5  -1   -2.20    2.60
  13  -5  -1  126.79   11.40
  13  -5  -1  162.88   11.20
  13  -5  -1  141.29   11.80
  13  -5  -1  137.79   10.20
  13   5  -1  162.78   13.50
  13   5  -1  145.79   11.50
  13   5  -1  151.98   10.70
  12  -5  -1   20.40    3.00
  12  -5  -1   27.80    4.00
  12  -5  -1   14.20    3.80
  12  -5  -1   17.60    4.10
  12   5  -1   19.30    3.90
  12   5  -1   22.40    5.40
 -12   5   1   20.20    2.60
 -12   5   1   13.30    3.10
  12   5  -1   16.80    3.20
  11  -5  -1  123.29   10.20
  11  -5  -1  135.49    9.30
  11  -5  -1  120.59   10.10
  11  -5  -1  132.59   10.70
 -11  -5   1  122.79    9.50
  11  -5  -1  144.19    9.20
 -11   5   1  129.79    9.50
  11   5  -1  116.49    9.70
  11   5  -1  123.29    9.20
  11   5  -1  130.89   11.40
  10  -5  -1  386.26   24.10
 -10  -5   1  392.96   22.20
  10  -5  -1  337.87   23.70
  10  -5  -1  383.46   23.10
 -10  -5   1  367.76   22.20
  10  -5  -1  411.06   24.60
 -10  -5   1  379.56   23.30
  10  -5  -1  395.76   22.90
 -10   5   1  367.86   23.20
  10   5  -1  372.26   23.60
  10   5  -1  390.16   23.60
  10   5  -1  390.96   25.00
  10   5  -1  410.66   22.30
 -10   5   1  336.17   22.50
  10   5  -1  361.06   22.90
  -9  -5   1  124.49    8.40
   9  -5  -1  142.69    9.10
  -9  -5   1  127.19    8.40
   9  -5  -1  109.19    9.10
   9  -5  -1  138.09   10.00
  -9  -5   1  120.29    8.80
   9  -5  -1  141.29   10.10
   9  -5  -1  136.29    8.80
  -9   5   1  130.99    8.70
  -9   5   1  117.39    9.00
   9   5  -1  134.19    8.30
   9   5  -1  120.99    9.30
   9   5  -1  124.09    8.80
   9   5  -1  108.19   10.30
   9   5  -1  134.09    9.40
  -8  -5   1  342.17   19.90
  -8  -5   1  323.17   19.80
   8  -5  -1  341.57   20.80
   8  -5  -1  345.27   20.30
   8  -5  -1  338.87   20.00
   8  -5  -1  329.17   21.00
   8  -5  -1  288.67   20.70
  -8  -5   1  339.07   20.20
  -8   5   1  342.37   19.60
   8   5  -1  363.46   20.10
  -8   5   1  318.07   20.30
   8   5  -1  345.97   19.80
   8   5  -1  347.47   20.70
   8   5  -1  306.67   21.40
  -8   5   1  331.17   20.20
  -8   5   1  318.87   21.10
   8   5  -1  340.67   20.70
   7  -5  -1  116.69    9.90
   7  -5  -1  145.79   10.00
   7  -5  -1  144.79    9.40
   7  -5  -1  153.78   10.40
  -7  -5   1  155.38    9.50
  -7  -5   1  152.68    9.50
   7  -5  -1  133.39    9.50
   7  -5  -1  161.18   10.40
  -7  -5   1  145.79    9.50
  -7   5   1  147.29    9.70
   7   5  -1  146.29   10.00
   7   5  -1  151.48    9.40
  -7   5   1  150.28    9.10
   7   5  -1  146.09    9.30
  -7   5   1  150.88   10.40
   7   5  -1  134.29   10.60
  -7   5   1  145.69    9.70
   7   5  -1  154.98   10.00
   6  -5  -1   35.00    3.10
  -6  -5   1   31.00    3.00
  -6  -5   1   34.00    3.30
   6  -5  -1   30.10    3.60
  -6  -5   1   34.40    3.10
  -6  -5   1   34.20    2.90
   6  -5  -1   32.00    3.30
   6  -5  -1   35.60    3.60
   6  -5  -1   27.60    3.00
  -6   5   1   32.90    2.50
   6   5  -1   26.00    4.10
  -6   5   1   33.30    3.30
   6   5  -1   30.10    3.50
   6   5  -1   34.20    3.50
  -6   5   1   30.00    3.30
   6   5  -1   35.70    3.00
  -6   5   1   34.10    2.70
   6   5  -1   32.00    2.90
  -6   5   1   39.40    3.80
  -5  -5   1   22.70    2.40
  -5  -5   1   24.50    2.20
   5  -5  -1   20.80    2.60
   5  -5  -1   20.50    3.00
   5  -5  -1   22.00    2.70
   5  -5  -1   19.70    2.50
   5  -5  -1   21.20    3.20
  -5  -5   1   21.20    2.70
  -5  -5   1   23.10    2.50
   5  -5  -1   25.30    2.50
  -5   5   1   22.20    2.10
   5   5  -1   22.10    2.20
  -5   5   1   23.00    2.80
  -5   5   1   24.90    2.70
   5   5  -1   25.60    3.20
   5   5  -1   24.00    2.90
  -5   5   1   28.30    3.50
  -5   5   1   17.80    2.50
  -5   5   1   21.60    2.60
  -5   5   1   21.50    2.00
   5   5  -1   23.80    2.40
   4  -5  -1  648.54   39.90
   4  -5  -1  714.23   40.10
  -4  -5   1  735.13   39.50
   4  -5  -1  609.14   40.10
   4  -5  -1  757.62   40.10
  -4  -5   1  665.03   39.70
   4  -5  -1  694.53   39.90
  -4  -5   1  628.04   39.80
  -4  -5   1  734.93   40.00
   4  -5  -1  681.63   40.30
  -4   5   1  608.74   39.90
  -4   5   1  734.53   39.50
   4   5  -1  691.53   39.80
  -4   5   1  732.73   39.70
   4   5  -1  729.63   40.20
  -4   5   1  690.93   40.00
  -4   5   1  743.53   40.00
   4   5  -1  688.03   40.10
  -4   5   1  759.22   40.40
  -4   5   1  714.53   40.70
   4   5  -1  685.43   39.60
  -3  -5   1  265.87   14.00
   3  -5  -1  226.68   13.60
   3  -5  -1  207.78   13.50
  -3  -5   1  239.08   13.50
  -3  -5   1  195.48   13.40
  -3  -5   1  245.78   12.90
   3  -5  -1  195.88   13.30
  -3  -5   1  189.38   13.20
   3  -5  -1  242.88   13.60
   3  -5  -1  202.78   13.70
  -3  -5   1  234.18   13.00
  -3   5   1  224.58   13.40
  -3   5   1  238.58   13.20
   3   5  -1  219.28   13.30
  -3   5   1  253.37   13.90
  -3   5   1  235.98   13.70
  -3   5   1  217.28   13.30
   3   5  -1  208.28   13.50
   3   5  -1  244.98   13.70
  -3   5   1  209.78   13.50
   3   5  -1  203.08   13.60
  -2  -5   1  905.71   49.30
  -2  -5   1  890.91   49.10
   2  -5  -1  815.52   49.00
  -2  -5   1  761.52   48.90
  -2  -5   1  816.52   49.10
  -2  -5   1  911.51   48.70
   2  -5  -1  872.81   49.30
   2  -5  -1  813.82   49.30
   2  -5  -1  952.10   49.10
   2   5  -1  821.82   48.90
   2   5  -1  854.91   49.20
  -2   5   1  851.41   48.80
  -2   5   1  911.31   49.30
  -2   5   1  921.41   49.10
   2   5  -1  846.92   48.80
  -2   5   1  799.72   49.00
  -2   5   1  918.01   49.30
  -2   5   1  814.72   49.10
  -2   5   1  877.51   49.20
   2   5  -1  815.72   49.20
   2   5  -1  936.41   49.20
  -2   5   1  918.31   49.00
  -1  -5   1 5317.17  303.77
   1  -5  -1 5552.34  303.87
   0  -5  -1  940.01   49.10
   0  -5   1  866.11   49.10
   0  -5   1  783.22   49.00
   0  -5   1  829.22   49.00
   0  -5  -1  785.92   48.80
   0  -5  -1  809.32   49.10
   0  -5   1  843.32   49.20
   0  -5  -1  932.91   49.10
   0  -5   1  905.61   49.20
   0  -5  -1  898.21   49.50
   0  -5  -1  944.01   48.70
   0  -5   1  915.81   49.10
   0   5  -1  894.91   49.10
   0   5   1  911.21   49.20
   0   5   1  835.12   49.10
   0   5  -1  809.62   49.00
   0   5   1  928.01   49.20
   0   5  -1  858.01   49.10
   0   5   1  844.12   48.90
   0   5  -1  863.51   49.10
   0   5   1  809.42   49.00
   0   5  -1  851.51   49.10
  -1  -5  -1 4363.46  221.38
   1  -5   1 3954.00  221.58
   1  -5   1 4315.37  221.48
   1  -5   1 3669.03  221.38
   1  -5   1 3994.40  221.38
  -1  -5  -1 3800.92  221.38
  -1  -5  -1 3910.91  221.08
   1   5   1 3764.82  221.38
   1   5   1 4057.69  221.48
   1   5   1 3889.11  221.48
  -1   5  -1 3760.12  221.38
  -1   5  -1 3893.71  221.28
   1   5   1 3837.72  221.88
  -1   5  -1 3894.01  221.48
   1   5   1 3786.42  221.08
   1   5   1 4013.50  221.38
  -1   5  -1 4388.46  221.58
  -2  -5  -1 2947.80  151.08
   2  -5   1 2347.07  150.68
   2  -5   1 2734.53  150.78
  -2  -5  -1 2605.34  150.48
   2  -5   1 2835.02  150.78
   2  -5   1 2664.13  150.78
   2  -5   1 2617.94  150.48
  -2  -5  -1 3007.20  150.58
   2  -5   1 2693.83  150.58
  -2  -5  -1 2921.41  150.28
   2  -5   1 2572.74  150.98
   2   5   1 2511.75  150.88
   2   5   1 2682.43  150.58
  -2   5  -1 2435.06  150.88
  -2   5  -1 2736.43  150.58
  -2   5  -1 2606.44  150.48
   2   5   1 2643.44  150.68
   2   5   1 2565.24  150.18
  -2   5  -1 2803.62  150.88
  -2   5  -1 2927.31  150.78
   2   5   1 2597.94  150.58
   3  -5   1 1419.46   84.49
  -3  -5  -1 1604.04   83.79
  -3  -5  -1 1652.33   84.99
   3  -5   1 1480.25   84.29
  -3  -5  -1 1588.64   84.09
   3  -5   1 1491.45   84.59
   3  -5   1 1401.96   84.09
  -3  -5  -1 1448.26   84.09
   3  -5   1 1557.44   84.59
   3   5   1 1414.26   84.79
   3   5   1 1446.06   84.29
  -3   5  -1 1414.16   84.79
  -3   5  -1 1610.94   84.19
   3   5   1 1462.55   84.29
   3   5   1 1499.15   84.39
   3   5   1 1404.46   83.69
  -3   5  -1 1602.84   84.69
   3   5   1 1416.26   83.69
  -3   5  -1 1408.06   84.19
  -3   5  -1 1634.74   84.49
   4  -5   1 2046.00  121.79
   4  -5   1 2130.49  122.49
   4  -5   1 1830.62  122.59
   4  -5   1 2034.10  122.29
  -4  -5  -1 2397.46  121.79
   4  -5   1 2246.58  122.39
  -4  -5  -1 2218.28  121.79
  -4  -5  -1 2281.57  121.89
   4  -5   1 2217.78  122.79
   4   5   1 2310.17  122.59
  -4   5  -1 2300.37  122.69
  -4   5  -1 2013.70  122.19
   4   5   1 2225.58  122.09
  -4   5  -1 2318.77  121.99
  -4   5  -1 2310.27  122.19
   4   5   1 2136.49  122.19
  -4   5  -1 1944.41  122.69
   5  -5   1  224.48   16.30
   5  -5   1  251.37   15.90
  -5  -5  -1  275.27   15.20
   5  -5   1  250.67   16.10
   5  -5   1  280.37   16.60
   5  -5   1  271.87   15.30
  -5  -5  -1  272.97   15.20
   5  -5   1  264.97   15.90
  -5  -5  -1  277.87   15.50
   5   5   1  253.87   15.30
   5   5   1  273.07   15.60
   5   5   1  230.38   16.50
  -5   5  -1  232.18   16.40
   5   5   1  263.77   15.80
  -5   5  -1  285.57   15.70
  -5   5  -1  265.77   16.20
  -5   5  -1  272.47   15.40
   6  -5   1   72.49    6.20
  -6  -5  -1   71.39    5.20
   6  -5   1   73.19    5.80
   6  -5   1   66.19    5.40
   6  -5   1   77.69    5.60
   6   5   1   59.59    6.20
  -6   5  -1   72.99    5.80
  -6   5  -1   79.79    5.20
   6   5   1   77.59    5.00
  -6   5  -1   66.29    6.10
   6   5   1   77.79    5.50
  -6   5  -1   74.59    4.80
   6   5   1   72.99    5.30
   7  -5   1  141.79   11.50
  -7  -5  -1  171.38   10.90
   7  -5   1  171.78   12.10
   7  -5   1  167.48   11.20
   7  -5   1  169.98   11.00
   7  -5   1  187.98   11.60
   7   5   1  182.18   10.70
  -7   5  -1  172.68   11.40
   7   5   1  141.09   11.80
   7   5   1  162.58   11.00
  -7   5  -1  177.68   10.50
   7   5   1  172.78   11.50
   7   5   1  184.08   11.10
   8  -5   1  313.87   19.30
   8  -5   1  297.67   18.50
   8  -5   1  249.78   18.50
  -8  -5  -1  276.67   17.80
   8  -5   1  294.37   18.30
   8  -5   1  320.07   18.00
   8   5   1  306.47   17.60
   8   5   1  293.27   17.60
   8   5   1  303.17   18.40
   8   5   1  255.27   19.00
  -8   5  -1  280.77   18.30
   8   5   1  290.67   18.00
  -8   5  -1  298.27   17.20
   9  -5   1 1060.59   58.99
   9  -5   1 1084.19   59.99
   9  -5   1  908.91   59.09
   9  -5   1  982.30   58.89
  -9  -5  -1  998.70   58.49
   9  -5   1 1069.69   58.39
   9   5   1  897.01   59.69
   9   5   1 1096.99   57.49
  -9   5  -1  964.90   57.29
   9   5   1 1048.70   58.79
   9   5   1  976.90   57.99
  -9   5  -1  961.90   58.69
   9   5   1 1127.89   58.69
  10  -5   1  375.76   23.30
 -10  -5  -1  349.27   22.70
  10  -5   1  359.46   22.40
  10  -5   1  360.16   24.10
  10  -5   1  328.47   23.30
 -10   5  -1  362.66   23.70
  10   5   1  356.96   22.30
  10   5   1  400.86   21.50
  10   5   1  347.87   24.40
  10   5   1  421.86   23.10
  10   5   1  383.16   23.10
  11  -5   1  185.88   12.80
  11  -5   1  172.18   10.90
  11  -5   1  154.18   12.60
  11  -5   1  180.98   11.70
  11   5   1  155.78   13.70
 -11   5  -1  169.68   12.30
  11   5   1  180.88   14.00
  11   5   1  171.38   11.60
  11   5   1  181.48   12.30
  12  -5   1   34.10    6.10
  12  -5   1   28.60    4.70
  12  -5   1   36.10    4.40
 -12   5  -1   34.20    4.70
  12   5   1   33.50    4.20
  12   5   1   33.90    5.00
  12   5   1   21.50    5.40
  13  -5   1  293.07   18.40
  13  -5   1  267.37   19.10
  13  -5   1  281.27   19.10
  13   5   1  272.47   17.80
  13   5   1  259.27   20.50
  14  -5   1   72.59    7.50
  14  -5   1   67.49    6.20
  14  -5   1   40.90    6.50
  14   5   1   67.29    6.40
  14   5   1   67.49    7.10
  14   5   1   60.39    9.40
  15  -5   1   60.29    5.60
  15  -5   1   51.89    7.10
  15  -5   1   49.40    9.20
  15   5   1   51.99    5.80
  15   5   1   59.59    7.50
  15   5   1   36.70    8.10
  16  -5   1   -2.80    2.10
  16  -5   1    0.00    1.80
  16  -5   1    2.90    2.60
  16   5   1    0.00    4.20
  16   5   1    4.40    3.10
  16   5   1    0.90    2.30
  17  -5   1    0.00    4.90
  17  -5   1    5.70    3.40
  17   5   1    4.20    5.10
  17   5   1    4.80    3.10
  17   5   1    7.10    3.00
  18  -5   1   34.90    6.60
  18  -5   1   55.59    7.90
  18   5   1   19.90    7.30
  18   5   1   43.00    6.10
  18   5   1   68.29    7.60
  18  -6  -1   20.80    5.40
  18  -6  -1   13.70    4.50
  18   6  -1   17.10    4.00
  18   6  -1   14.20    6.10
  18   6  -1    7.30    4.10
  17  -6  -1   33.40    6.20
  17  -6  -1   29.00    6.00
  17   6  -1   35.10    6.00
  17   6  -1   21.60    4.70
  17   6  -1   26.20    7.10
  16  -6  -1    1.20    2.40
  16  -6  -1    2.70    2.90
  16   6  -1   -0.90    2.10
  16   6  -1    0.80    2.60
  16   6  -1    1.00    4.70
  15  -6  -1   57.49    8.10
  15  -6  -1   63.09    6.30
  15   6  -1   61.89    8.00
  15   6  -1   72.29   10.50
  15   6  -1   69.59    6.80
  14  -6  -1    6.60    2.00
  14  -6  -1    4.30    3.10
  14  -6  -1   10.70    3.00
  14  -6  -1    7.50    3.70
  14   6  -1    6.70    2.80
  14   6  -1    6.50    4.70
  14   6  -1   13.90    3.90
  13  -6  -1  103.09    9.60
  13  -6  -1  116.39   10.10
  13  -6  -1  110.09    8.10
  13  -6  -1  111.39    8.80
  13   6  -1  133.29   11.80
  13   6  -1  103.19    9.60
  13   6  -1  106.39    8.70
  12  -6  -1  258.27   17.30
  12  -6  -1  213.38   16.60
  12  -6  -1  248.28   15.40
  12   6  -1  255.47   18.30
 -12   6   1  237.18   14.90
 -11  -6   1  281.17   18.50
  11  -6  -1  314.57   18.10
  11  -6  -1  288.17   19.70
  11  -6  -1  293.27   18.50
  11  -6  -1  270.47   19.20
  11   6  -1  305.97   20.70
 -11   6   1  275.67   18.70
  11   6  -1  294.17   19.20
 -11   6   1  280.47   17.80
  11   6  -1  314.57   17.50
  11   6  -1  281.67   18.20
  10  -6  -1    0.70    2.20
 -10  -6   1    2.70    1.60
  10  -6  -1    4.60    2.20
  10  -6  -1    3.10    1.60
 -10  -6   1    3.10    1.10
  10  -6  -1    3.60    2.60
 -10  -6   1    2.40    1.20
  10  -6  -1    4.70    2.00
 -10   6   1    0.60    1.60
  10   6  -1    0.70    1.80
  10   6  -1   -1.40    2.10
  10   6  -1    1.60    1.30
 -10   6   1    1.30    1.40
  10   6  -1    3.80    1.80
   9  -6  -1  124.89   10.90
  -9  -6   1  146.69   10.20
   9  -6  -1  167.88   10.70
   9  -6  -1  170.68   11.60
   9  -6  -1  157.48   10.20
   9  -6  -1  153.48   10.90
   9  -6  -1  160.78   11.40
  -9  -6   1  159.48    9.90
  -9  -6   1  151.48    9.90
  -9   6   1  156.68   10.30
   9   6  -1  152.08   10.90
   9   6  -1  144.69   10.10
   9   6  -1  148.29   10.90
   9   6  -1  169.08   10.00
   9   6  -1  156.88   12.10
  -9   6   1  140.19   10.60
   8  -6  -1  566.64   32.60
   8  -6  -1  504.55   34.50
   8  -6  -1  578.54   33.00
  -8  -6   1  537.25   32.70
  -8  -6   1  557.54   32.50
  -8  -6   1  563.34   32.50
   8  -6  -1  557.64   33.70
  -8   6   1  565.24   32.90
   8   6  -1  536.75   34.20
  -8   6   1  525.25   33.00
   8   6  -1  588.34   33.40
   8   6  -1  580.24   32.60
  -8   6   1  576.74   32.10
   8   6  -1  589.34   32.50
  -8   6   1  554.64   33.90
   7  -6  -1  250.37   14.90
   7  -6  -1  249.78   15.50
  -7  -6   1  243.48   14.80
   7  -6  -1  250.37   15.70
  -7  -6   1  250.17   14.90
   7  -6  -1  206.68   15.40
  -7  -6   1  254.17   14.90
   7  -6  -1  227.58   15.00
   7  -6  -1  235.18   15.70
  -7   6   1  229.88   15.20
   7   6  -1  252.57   15.50
   7   6  -1  230.18   16.20
  -7   6   1  240.48   14.20
   7   6  -1  269.37   14.90
  -7   6   1  239.18   15.20
  -7   6   1  241.98   15.90
  -7   6   1  241.88   14.40
   7   6  -1  243.98   15.50
   7   6  -1  257.47   14.80
   6  -6  -1   78.19    6.30
   6  -6  -1   82.39    6.30
  -6  -6   1   84.59    6.10
   6  -6  -1   86.19    5.90
   6  -6  -1   74.29    6.50
   6  -6  -1   79.09    6.60
  -6  -6   1   96.59    6.20
  -6  -6   1   83.09    6.00
   6  -6  -1   80.69    6.10
  -6  -6   1   79.39    6.00
   6   6  -1   90.79    6.00
   6   6  -1   88.69    6.60
  -6   6   1   88.39    6.80
   6   6  -1   88.09    5.80
  -6   6   1   86.89    5.40
  -6   6   1   86.59    6.50
   6   6  -1   87.99    6.50
  -6   6   1   86.69    6.30
   6   6  -1   72.19    6.80
  -6   6   1   81.79    6.20
  -6   6   1   85.29    5.50
   5  -6  -1 1037.40   58.69
   5  -6  -1  977.70   58.89
   5  -6  -1  916.81   58.69
   5  -6  -1 1113.19   58.89
  -5  -6   1  997.20   58.29
   5  -6  -1  953.60   58.39
  -5  -6   1 1057.49   58.39
  -5  -6   1 1016.20   58.39
   5  -6  -1 1051.69   58.59
  -5  -6   1 1078.59   57.99
  -5   6   1 1072.99   59.09
   5   6  -1 1087.29   58.89
  -5   6   1 1061.99   57.89
  -5   6   1 1053.69   58.49
  -5   6   1  990.60   58.59
   5   6  -1  910.31   58.89
  -5   6   1 1087.49   57.89
  -5   6   1 1060.29   58.69
   5   6  -1  978.40   57.99
  -5   6   1 1000.80   58.59
   5   6  -1  989.10   58.59
   5   6  -1 1061.59   58.29
   4  -6  -1   24.20    2.80
   4  -6  -1   27.80    3.00
  -4  -6   1   28.40    2.90
   4  -6  -1   25.90    2.80
  -4  -6   1   24.00    2.70
  -4  -6   1   26.70    3.50
  -4  -6   1   31.80    2.00
   4  -6  -1   30.90    2.80
  -4  -6   1   30.40    2.30
   4  -6  -1   28.20    3.10
  -4  -6   1   26.50    3.00
   4  -6  -1   23.80    3.20
   4   6  -1   23.80    3.50
  -4   6   1   28.00    3.10
  -4   6   1   25.20    2.90
  -4   6   1   26.20    2.90
   4   6  -1   26.90    2.40
  -4   6   1   28.50    2.50
  -4   6   1   32.00    3.30
   4   6  -1   28.90    3.20
   4   6  -1   29.00    3.20
  -4   6   1   24.70    2.70
   4   6  -1   33.40    2.90
  -4   6   1   28.10    2.60
  -3  -6   1 2323.57  119.49
   3  -6  -1 1957.40  118.99
   3  -6  -1 2052.99  119.29
   3  -6  -1 2356.86  119.09
  -3  -6   1 1903.11  118.79
  -3  -6   1 2246.98  119.09
  -3  -6   1 2238.28  118.49
  -3  -6   1 1905.31  118.89
   3  -6  -1 1885.21  118.79
   3  -6  -1 2165.18  119.19
  -3   6   1 2159.98  118.99
   3   6  -1 2157.48  118.59
  -3   6   1 2065.79  118.79
  -3   6   1 2215.18  118.69
  -3   6   1 2332.87  119.29
   3   6  -1 1940.31  119.09
   3   6  -1 2214.58  119.09
  -3   6   1 2277.47  119.29
  -3   6   1 1886.41  118.89
  -3   6   1 2156.48  118.99
   3   6  -1 1986.10  118.99
   2  -6  -1   61.69    4.50
   2  -6  -1   66.69    4.80
  -2  -6   1   67.39    4.70
  -2  -6   1   62.39    4.70
  -2  -6   1   67.19    5.10
  -2  -6   1   53.49    4.40
  -2  -6   1   58.89    4.20
   2  -6  -1   65.09    4.70
   2  -6  -1   73.59    4.90
   2  -6  -1   56.89    4.70
   2   6  -1   63.69    4.70
  -2   6   1   59.19    4.60
  -2   6   1   61.59    4.70
   2   6  -1   69.19    5.10
   2   6  -1   59.29    4.30
  -2   6   1   64.29    4.40
   2   6  -1   62.19    4.70
  -2   6   1   58.29    4.40
   2   6  -1   59.49    4.60
   1  -6  -1  233.88   14.00
   1  -6  -1  214.98   14.00
  -1  -6   1  220.08   14.10
   1  -6  -1  271.17   14.40
  -1  -6   1  204.68   14.20
  -1  -6   1  254.37   14.30
   1  -6  -1  248.28   14.20
  -1  -6   1  226.38   14.00
   1  -6  -1  248.88   14.60
  -1  -6   1  254.57   14.30
  -1   6   1  229.48   14.40
  -1   6   1  253.67   14.10
   1   6  -1  248.98   14.20
  -1   6   1  217.68   14.20
  -1   6   1  234.08   14.10
   1   6  -1  223.48   14.30
  -1   6   1  251.47   14.20
   1   6  -1  233.08   14.50
  -1   6   1  263.07   14.50
   1   6  -1  220.28   14.10
   1   6  -1  238.78   14.30
   0  -6  -1  193.88   12.10
   0  -6   1  184.38   12.20
   0  -6   1  194.08   12.30
   0  -6   1  187.28   12.40
   0  -6   1  219.28   12.40
   0  -6  -1  213.98   12.80
   0  -6  -1  227.58   12.40
   0  -6  -1  177.08   12.30
   0  -6   1  210.88   12.50
   0  -6  -1  224.78   12.40
   0  -6  -1  220.38   12.00
   0   6  -1  183.98   12.30
   0   6   1  216.38   12.20
   0   6   1  185.48   12.70
   0   6   1  221.58   12.40
   0   6  -1  229.98   12.40
   0   6  -1  195.68   12.40
   0   6   1  198.98   12.40
   0   6  -1  195.68   12.40
   0   6   1  221.18   12.50
   0   6   1  187.48   12.20
   0   6  -1  215.78   12.50
   0   6  -1  194.48   12.30
   1  -6   1   92.19    6.50
  -1  -6  -1   96.89    6.50
   1  -6   1   92.79    6.60
  -1  -6  -1  104.69    6.60
  -1  -6  -1  109.49    5.90
  -1  -6  -1   89.69    6.10
  -1  -6  -1  101.29    6.40
   1  -6   1  108.19    7.00
   1  -6   1   99.69    6.50
   1  -6   1   90.09    6.40
   1  -6   1  104.89    6.50
   1   6   1  103.39    6.60
  -1   6  -1  105.49    6.60
   1   6   1   95.59    6.50
  -1   6  -1   97.59    6.90
   1   6   1   95.39    6.10
  -1   6  -1   93.69    6.50
   1   6   1  104.79    6.60
  -1   6  -1  107.89    6.40
  -1   6  -1   94.79    6.40
   1   6   1   89.19    7.00
   1   6   1   84.29    6.40
   2  -6   1   92.89    6.70
  -2  -6  -1  101.99    6.20
  -2  -6  -1   97.39    6.50
  -2  -6  -1  101.69    6.90
   2  -6   1  100.19    6.50
   2  -6   1   99.99    6.60
   2  -6   1  102.79    6.60
  -2  -6  -1  106.69    6.50
   2  -6   1   91.79    6.70
   2  -6   1  108.19    6.80
   2  -6   1   94.49    6.90
   2   6   1   99.89    6.60
  -2   6  -1   93.99    6.40
   2   6   1   93.69    6.60
  -2   6  -1  108.29    6.70
  -2   6  -1   89.79    6.60
   2   6   1   94.79    6.80
   2   6   1  100.29    6.10
  -2   6  -1  109.29    6.50
  -2   6  -1  108.29    6.90
   3  -6   1  310.47   18.70
   3  -6   1  324.27   19.00
   3  -6   1  280.57   18.90
  -3  -6  -1  359.56   18.40
   3  -6   1  336.37   19.10
  -3  -6  -1  339.97   18.70
   3  -6   1  317.27   18.90
  -3  -6  -1  308.17   18.70
  -3  -6  -1  357.06   19.50
   3  -6   1  318.47   19.20
   3   6   1  310.47   18.90
   3   6   1  293.87   19.10
   3   6   1  316.97   18.90
  -3   6  -1  320.97   19.20
  -3   6  -1  295.67   18.70
  -3   6  -1  341.97   18.70
  -3   6  -1  341.97   19.00
   3   6   1  309.87   18.20
  -3   6  -1  294.77   19.20
   4  -6   1  880.31   50.39
  -4  -6  -1  900.91   49.80
   4  -6   1  890.71   50.29
  -4  -6  -1  956.10   49.60
   4  -6   1  850.11   50.49
   4  -6   1  764.82   50.59
   4  -6   1  886.81   49.90
  -4  -6  -1  861.61   49.80
  -4   6  -1  957.50   49.99
   4   6   1  887.71   50.09
   4   6   1  872.71   50.19
   4   6   1  897.71   49.50
   4   6   1  816.22   50.69
  -4   6  -1  928.21   50.19
  -4   6  -1  780.42   50.59
  -4   6  -1  936.01   50.59
  -4   6  -1  849.12   50.09
   4   6   1  903.01   50.09
  -5  -6  -1 1767.12   96.09
   5  -6   1 1472.65   97.09
   5  -6   1 1786.32   97.39
  -5  -6  -1 1756.02   96.09
   5  -6   1 1681.63   96.79
   5  -6   1 1698.73   96.69
   5  -6   1 1639.44   96.99
  -5  -6  -1 1763.02   96.09
   5  -6   1 1816.52   96.29
   5   6   1 1563.34   97.29
  -5   6  -1 1828.52   96.29
  -5   6  -1 1745.83   96.59
   5   6   1 1673.43   96.59
  -5   6  -1 1687.23   96.69
  -5   6  -1 1620.14   97.29
   5   6   1 1733.03   96.49
   5   6   1 1712.43   96.59
  -5   6  -1 1722.63   97.09
   5   6   1 1826.62   95.99
   6  -6   1  407.96   24.50
   6  -6   1  382.66   24.10
  -6  -6  -1  419.06   23.20
  -6  -6  -1  409.06   23.60
   6  -6   1  439.66   24.90
   6  -6   1  344.07   24.50
   6  -6   1  444.96   23.50
   6  -6   1  392.46   24.10
  -6   6  -1  422.56   23.50
  -6   6  -1  381.76   24.90
   6   6   1  429.06   24.20
   6   6   1  406.26   23.70
  -6   6  -1  402.16   24.50
  -6   6  -1  415.16   23.80
   6   6   1  351.46   24.80
   6   6   1  423.96   23.50
   7  -6   1   94.09    8.50
   7  -6   1  121.29    8.60
  -7  -6  -1  123.59    7.80
   7  -6   1  115.09    8.80
   7  -6   1  112.29    8.10
   7  -6   1  111.99    8.20
  -7   6  -1  113.79    8.90
   7   6   1  119.69    7.50
   7   6   1   94.49    8.90
  -7   6  -1  121.29    7.30
  -7   6  -1  120.99    8.60
  -7   6  -1  107.99    7.60
   7   6   1  123.49    8.60
   7   6   1  121.79    8.20
   7   6   1  123.09    7.60
  -8  -6  -1   53.19    4.70
   8  -6   1   61.69    5.10
   8  -6   1   47.90    5.60
   8  -6   1   62.09    5.20
   8  -6   1   61.99    5.90
   8  -6   1   55.59    5.40
   8   6   1   57.39    5.10
  -8   6  -1   53.39    5.20
   8   6   1   38.00    5.70
   8   6   1   61.49    4.50
   8   6   1   54.09    4.40
   8   6   1   62.99    5.90
  -8   6  -1   56.69    4.40
   9  -6   1  783.72   52.39
   9  -6   1  985.80   51.89
   9  -6   1  915.31   53.09
  -9  -6  -1  897.21   51.69
   9  -6   1  916.01   52.29
   9  -6   1  851.81   52.29
   9   6   1  743.03   52.89
   9   6   1  943.31   50.99
   9   6   1  960.40   52.09
   9   6   1  902.41   52.19
   9   6   1  913.91   51.29
  -9   6  -1  891.51   50.79
  10  -6   1    4.70    2.60
  10  -6   1    5.00    2.40
  10  -6   1    3.30    1.80
 -10  -6  -1    4.10    1.70
  10  -6   1    2.30    2.00
  10   6   1    2.70    2.00
  10   6   1    4.30    1.40
  10   6   1    3.10    1.60
 -10   6  -1    1.80    1.80
  10   6   1    6.40    3.60
  11  -6   1    2.30    1.70
  11  -6   1    2.10    2.30
  11  -6   1    5.50    2.70
  11   6   1    1.70    2.80
  11   6   1    0.80    2.00
 -11   6  -1    1.00    2.20
  11   6   1    1.10    1.10
  11   6   1    0.20    1.50
  12  -6   1    2.10    2.60
  12  -6   1    5.70    2.20
  12  -6   1    6.30    2.30
  12  -6   1    5.10    4.10
  12   6   1    1.40    3.00
  12   6   1   10.60    2.60
  12   6   1    6.50    2.90
  13  -6   1    5.60    2.50
  13  -6   1    0.30    2.30
  13  -6   1    3.20    2.40
  13   6   1   -1.50    3.50
  13   6   1    3.60    2.00
  13   6   1    4.60    2.90
  14  -6   1   77.69    6.90
  14  -6   1   72.19    8.20
  14  -6   1   83.79    8.40
  14   6   1   75.29    7.90
  14   6   1   69.39    9.90
  14   6   1   77.19    7.00
  15  -6   1  330.87   22.70
  15  -6   1  340.47   21.10
  15  -6   1  326.77   22.70
  15   6   1  322.67   22.10
  15   6   1  319.27   24.40
  15   6   1  328.57   21.10
  16  -6   1   55.39    7.80
  16  -6   1   62.89    8.10
  16  -6   1   54.69    6.00
  16   6   1   56.69    9.20
  16   6   1   56.89    6.00
  16   6   1   50.39    7.10
  17  -6   1   15.30    4.70
  17  -6   1   16.00    4.00
  17   6   1   13.20    4.20
  17   6   1    5.10    5.30
  17   6   1    4.30    2.80
  18  -6   1   12.70    4.40
  18  -6   1    7.70    4.10
  18   6   1    5.80    3.80
  18   6   1    6.70    5.60
  18   6   1    4.40    3.00
  18  -7  -1    6.50    3.70
  18  -7  -1    4.00    3.30
  18   7  -1    9.70    3.10
  18   7  -1    2.80    9.20
  17  -7  -1   47.70    7.40
  17  -7  -1   39.80    7.00
  17   7  -1   56.49    9.50
  17   7  -1   40.00    5.60
  17   7  -1   31.30    8.00
  16  -7  -1    3.60    3.00
  16  -7  -1    2.80    3.20
  16  -7  -1    1.50    2.30
  16   7  -1    2.40    2.40
  16   7  -1    8.70    5.10
  16   7  -1    0.30    3.20
  15  -7  -1  397.66   24.80
  15  -7  -1  383.36   26.40
  15  -7  -1  381.06   26.10
  15   7  -1  403.86   28.00
  15   7  -1  390.36   25.80
  15   7  -1  383.96   24.60
  14  -7  -1    3.80    2.60
  14  -7  -1    4.10    3.20
  14  -7  -1    3.10    2.30
  14   7  -1   15.00    5.20
  14   7  -1    1.30    2.80
  14   7  -1    3.70    2.40
  13  -7  -1  425.26   25.80
  13  -7  -1  414.66   27.20
  13  -7  -1  391.46   26.70
  13   7  -1  421.06   25.50
  13   7  -1  392.96   26.40
  13   7  -1  428.46   28.40
 -12  -7   1  289.17   19.90
  12  -7  -1  325.47   18.60
  12  -7  -1  306.17   19.40
  12  -7  -1  286.67   20.30
  12  -7  -1  279.07   20.10
  12   7  -1  305.17   21.50
  12   7  -1  290.77   18.90
  12   7  -1  292.17   19.90
 -12   7   1  306.07   18.30
  11  -7  -1  549.65   35.70
 -11  -7   1  547.15   34.70
  11  -7  -1  590.54   36.10
  11  -7  -1  585.84   36.00
 -11   7   1  563.04   34.10
  11   7  -1  611.44   34.50
  11   7  -1  606.54   34.00
  11   7  -1  555.64   35.30
  11   7  -1  644.04   37.20
  10  -7  -1   90.59    6.40
  10  -7  -1   87.29    7.80
  10  -7  -1  104.09    8.40
 -10  -7   1   76.49    6.60
  10  -7  -1   94.59    7.20
 -10  -7   1   89.89    6.10
  10  -7  -1   76.19    7.60
 -10  -7   1   80.69    5.90
  10   7  -1   83.99    6.50
 -10   7   1   78.89    6.40
  10   7  -1   89.59    6.40
 -10   7   1   78.09    7.10
  10   7  -1   87.29    8.70
  10   7  -1   88.89    7.50
  -9  -7   1  794.72   46.60
   9  -7  -1  858.11   48.20
  -9  -7   1  785.52   46.90
  -9  -7   1  831.82   46.60
   9  -7  -1  812.52   47.80
   9  -7  -1  858.11   46.80
   9  -7  -1  862.41   47.40
   9  -7  -1  877.01   48.40
   9  -7  -1  695.13   47.70
  -9   7   1  785.02   47.50
   9   7  -1  833.52   48.50
  -9   7   1  788.52   47.00
   9   7  -1  861.71   46.80
   9   7  -1  781.32   47.60
  -9   7   1  793.62   46.10
   9   7  -1  795.42   48.70
   9   7  -1  782.92   46.70
   8  -7  -1    7.60    2.40
  -8  -7   1    8.60    2.10
   8  -7  -1    8.40    2.00
   8  -7  -1    7.20    2.50
  -8  -7   1   12.60    2.20
   8  -7  -1   10.40    2.50
   8  -7  -1   11.60    2.20
  -8  -7   1   11.00    2.00
   8   7  -1    8.90    2.60
   8   7  -1    9.80    3.20
  -8   7   1   10.30    2.30
   8   7  -1   10.20    2.10
  -8   7   1    7.50    2.00
   8   7  -1   11.10    2.70
  -8   7   1   11.20    1.70
  -8   7   1   10.70    1.50
   8   7  -1    8.20    1.80
  -7  -7   1 1103.49   61.59
   7  -7  -1 1050.29   61.79
   7  -7  -1 1105.69   62.29
   7  -7  -1 1128.59   62.29
   7  -7  -1 1038.50   62.49
  -7  -7   1  962.70   63.29
  -7  -7   1 1123.59   61.39
   7  -7  -1 1042.50   62.39
   7  -7  -1 1073.29   61.39
   7   7  -1 1120.29   62.19
   7   7  -1 1114.59   61.49
   7   7  -1 1022.90   62.79
  -7   7   1 1076.89   62.19
  -7   7   1 1035.00   61.89
   7   7  -1 1160.98   61.39
   7   7  -1 1115.99   62.29
  -7   7   1 1088.79   60.89
  -7   7   1 1005.30   62.49
  -7   7   1 1084.89   61.89
  -7   7   1 1099.99   60.89
   6  -7  -1    6.00    1.60
   6  -7  -1    3.90    1.60
   6  -7  -1    3.30    1.50
   6  -7  -1    3.10    1.40
   6  -7  -1    2.20    1.30
  -6  -7   1    2.80    1.40
   6  -7  -1    6.50    1.90
  -6  -7   1    4.10    1.60
  -6   7   1    6.70    1.30
   6   7  -1    5.30    1.70
  -6   7   1    3.20    1.40
   6   7  -1    6.00    2.30
   6   7  -1    1.70    1.10
  -6   7   1    7.00    1.70
  -6   7   1    6.00    1.70
   6   7  -1    4.20    1.30
  -6   7   1    3.10    1.50
   6   7  -1    3.40    1.70
  -6   7   1    4.10    1.10
  -6   7   1    6.60    2.10
  -5  -7   1   13.40    2.20
   5  -7  -1   12.00    2.10
   5  -7  -1   11.50    2.40
  -5  -7   1   17.20    1.70
   5  -7  -1   13.20    2.30
   5  -7  -1   16.90    2.60
  -5  -7   1   17.30    2.60
   5  -7  -1    8.70    2.00
  -5  -7   1   14.40    2.50
   5  -7  -1   15.90    2.30
  -5   7   1   15.80    1.90
  -5   7   1   15.60    2.50
  -5   7   1   15.30    1.90
  -5   7   1   12.50    2.20
  -5   7   1   15.10    2.50
   5   7  -1   14.90    2.50
   5   7  -1    8.20    2.10
  -5   7   1   16.90    2.70
   5   7  -1   14.70    2.60
   5   7  -1   16.70    2.00
  -5   7   1   19.10    2.70
   5   7  -1   11.70    2.00
  -4  -7   1  791.02   41.00
   4  -7  -1  607.34   40.20
  -4  -7   1  667.73   40.30
  -4  -7   1  739.43   41.00
   4  -7  -1  690.53   40.60
  -4  -7   1  654.83   40.30
   4  -7  -1  662.83   40.60
  -4  -7   1  726.63   39.70
   4  -7  -1  697.33   40.40
   4  -7  -1  667.73   40.80
  -4  -7   1  769.02   39.70
  -4   7   1  729.33   40.00
  -4   7   1  732.03   40.20
  -4   7   1  659.33   40.40
   4   7  -1  711.33   40.30
   4   7  -1  756.42   40.80
  -4   7   1  732.53   40.90
  -4   7   1  740.33   40.70
   4   7  -1  604.64   40.60
  -4   7   1  746.23   40.50
  -4   7   1  696.93   40.30
   4   7  -1  635.34   40.40
   3  -7  -1  383.96   21.30
  -3  -7   1  369.86   20.60
  -3  -7   1  322.27   21.10
  -3  -7   1  334.77   21.30
   3  -7  -1  323.87   21.30
  -3  -7   1  361.66   20.60
   3  -7  -1  358.66   21.50
  -3  -7   1  405.56   21.90
   3  -7  -1  315.67   21.10
  -3  -7   1  387.76   21.70
   3   7  -1  368.06   21.20
  -3   7   1  347.77   21.30
  -3   7   1  382.86   21.60
   3   7  -1  380.76   21.50
  -3   7   1  396.26   21.60
   3   7  -1  356.96   20.90
   3   7  -1  305.87   21.30
   3   7  -1  340.57   21.40
  -3   7   1  379.36   21.30
  -3   7   1  365.56   21.40
  -3   7   1  366.16   21.10
   2  -7  -1   14.60    2.10
   2  -7  -1   12.70    2.30
  -2  -7   1    6.50    1.60
   2  -7  -1   10.70    1.70
  -2  -7   1   14.70    2.30
   2  -7  -1    7.50    1.90
  -2  -7   1    9.20    1.50
   2  -7  -1   10.10    1.70
  -2  -7   1    7.50    1.70
  -2  -7   1   11.90    2.30
   2  -7  -1   13.60    2.00
   2   7  -1   14.50    2.00
  -2   7   1   11.80    1.90
  -2   7   1    7.80    1.50
  -2   7   1   16.70    2.40
   2   7  -1    8.10    1.60
  -2   7   1   12.40    1.80
   2   7  -1    7.70    1.90
   2   7  -1    9.80    1.70
  -2   7   1    9.60    1.90
  -2   7   1   13.70    2.00
   2   7  -1    9.00    1.80
   1  -7  -1    1.30    1.20
   1  -7  -1    1.50    1.60
   1  -7  -1   -0.10    0.80
  -1  -7   1    0.50    0.90
   1  -7  -1    0.40    0.70
   1  -7  -1    0.20    0.80
   1  -7  -1    1.20    1.00
  -1  -7   1    0.80    1.10
  -1  -7   1   -0.40    0.90
  -1  -7   1   -0.50    1.00
  -1  -7   1    1.80    1.10
  -1   7   1   -0.60    1.00
  -1   7   1   -0.40    1.10
   1   7  -1    0.90    1.00
  -1   7   1   -0.40    0.90
  -1   7   1    1.10    1.00
  -1   7   1    0.00    0.70
  -1   7   1    3.30    1.00
   1   7  -1    0.10    1.20
   1   7  -1    0.90    1.00
   1   7  -1   -0.40    0.80
   1   7  -1   -0.10    1.00
   1   7  -1    0.80    1.20
   0  -7  -1 1973.30  123.89
   0  -7   1 2455.45  124.09
   0  -7  -1 2012.00  123.59
   0  -7   1 2031.80  123.99
   0  -7   1 2115.39  123.79
   0  -7  -1 2308.57  124.49
   0  -7   1 2404.06  123.99
   0  -7  -1 2434.56  123.99
   0  -7   1 2236.38  124.09
   0  -7  -1 2281.27  123.49
   0  -7  -1 2348.07  123.99
   0  -7   1 2075.19  123.89
   0   7  -1 1952.10  123.79
   0   7  -1 2310.87  123.89
   0   7  -1 2148.29  123.99
   0   7   1 1996.50  123.89
   0   7   1 2071.59  123.79
   0   7   1 2431.06  123.99
   0   7  -1 2034.60  123.89
   0   7  -1 2464.75  124.19
   0   7   1 2153.48  123.69
   0   7   1 2065.49  124.29
   0   7   1 2395.46  124.09
  -1  -7  -1 3505.05  206.68
  -1  -7  -1 3864.51  206.68
  -1  -7  -1 3888.41  206.88
   1  -7   1 3202.58  206.58
  -1  -7  -1 3461.65  206.28
   1  -7   1 3383.46  206.68
   1  -7   1 3752.62  206.78
  -1  -7  -1 4163.78  206.08
   1  -7   1 3852.11  206.68
   1  -7   1 3627.34  206.88
   1  -7   1 4106.09  206.98
   1   7   1 3761.72  206.78
   1   7   1 3435.46  206.68
  -1   7  -1 3976.10  206.98
   1   7   1 3589.84  206.38
  -1   7  -1 3883.31  206.68
   1   7   1 3855.71  206.78
   1   7   1 3491.85  206.68
  -1   7  -1 4065.29  206.98
  -1   7  -1 3269.87  206.58
  -1   7  -1 3664.73  206.68
  -1   7  -1 3374.36  206.68
   2  -7   1  318.97   19.40
   2  -7   1  329.47   19.10
   2  -7   1  280.47   19.10
  -2  -7  -1  318.17   18.60
  -2  -7  -1  301.27   19.00
  -2  -7  -1  352.96   19.00
   2  -7   1  299.07   19.00
  -2  -7  -1  355.66   19.50
   2  -7   1  366.76   19.30
   2  -7   1  358.06   19.20
   2  -7   1  306.67   19.40
  -2   7  -1  321.87   18.90
   2   7   1  332.67   19.10
   2   7   1  301.47   19.20
  -2   7  -1  292.57   19.10
   2   7   1  320.67   19.10
   2   7   1  324.07   19.10
   2   7   1  310.47   19.90
  -2   7  -1  348.57   19.40
   2   7   1  306.87   18.60
  -3  -7  -1  359.06   21.70
  -3  -7  -1  397.46   21.70
   3  -7   1  366.16   21.80
   3  -7   1  319.57   21.90
   3  -7   1  346.57   21.60
   3  -7   1  402.66   22.10
  -3  -7  -1  384.06   21.30
   3  -7   1  353.66   22.20
  -3  -7  -1  395.46   22.40
   3  -7   1  384.96   22.00
  -3   7  -1  439.36   22.70
   3   7   1  360.26   21.20
   3   7   1  367.86   21.90
  -3   7  -1  354.06   22.20
   3   7   1  378.36   21.90
  -3   7  -1  376.46   22.20
   3   7   1  340.57   22.20
  -3   7  -1  364.76   21.70
   3   7   1  371.96   21.90
   4  -7   1    5.40    1.80
   4  -7   1    4.40    1.40
   4  -7   1    3.40    1.70
  -4  -7  -1    5.20    1.80
   4  -7   1    4.80    1.60
  -4  -7  -1    4.60    0.80
   4  -7   1    6.60    1.90
   4  -7   1    3.30    1.20
  -4  -7  -1    3.60    1.10
  -4  -7  -1    3.80    1.20
   4   7   1    3.10    1.40
   4   7   1    5.30    0.90
  -4   7  -1    2.70    1.40
   4   7   1    3.30    1.40
   4   7   1    2.50    1.90
   4   7   1    5.80    1.60
  -4   7  -1    5.00    1.30
  -4   7  -1    6.70    1.80
  -4   7  -1   10.10    1.80
   5  -7   1 1170.88   75.79
   5  -7   1 1209.18   75.39
   5  -7   1 1286.37   75.29
  -5  -7  -1 1342.67   74.79
  -5  -7  -1 1408.16   74.59
   5  -7   1 1434.66   74.99
   5  -7   1 1355.76   75.59
   5  -7   1 1274.97   75.69
  -5  -7  -1 1345.67   74.79
   5   7   1 1321.47   75.19
  -5   7  -1 1344.17   75.29
  -5   7  -1 1397.36   74.99
  -5   7  -1 1347.27   75.79
   5   7   1 1333.97   75.29
  -5   7  -1 1236.98   75.89
  -5   7  -1 1527.05   77.39
   5   7   1 1410.16   74.49
   5   7   1 1116.69   75.79
   5   7   1 1327.57   75.09
   6  -7   1  260.77   16.30
  -6  -7  -1  260.17   15.20
   6  -7   1  263.07   16.40
   6  -7   1  245.28   16.00
   6  -7   1  276.17   15.40
  -6  -7  -1  257.67   15.10
  -6  -7  -1  258.57   15.10
   6  -7   1  226.88   16.40
   6  -7   1  261.07   16.00
   6  -7   1  259.87   16.50
   6   7   1  265.27   15.60
  -6   7  -1  263.07   15.40
   6   7   1  206.68   16.40
  -6   7  -1  250.67   16.30
   6   7   1  265.37   16.00
   6   7   1  274.57   15.10
   7  -7   1   13.90    2.90
   7  -7   1    8.90    2.30
   7  -7   1   17.10    2.90
   7  -7   1   11.00    2.40
   7  -7   1   11.30    2.40
  -7   7  -1   16.00    1.90
   7   7   1   17.80    2.40
   7   7   1   12.20    2.90
   7   7   1   14.50    2.50
   7   7   1   14.40    1.90
  -7   7  -1   14.70    2.30
   7   7   1   11.00    3.30
  -7   7  -1   15.50    2.80
  -7   7  -1    6.70    2.30
   8  -7   1   35.40    4.60
   8  -7   1   36.50    3.80
   8  -7   1   32.90    4.60
   8  -7   1   29.40    3.80
  -8  -7  -1   34.20    3.40
   8   7   1   26.00    3.80
  -8   7  -1   32.70    3.20
   8   7   1   36.20    4.30
   8   7   1   30.80    3.10
   8   7   1   33.40    3.30
   9  -7   1 1015.30   52.79
   9  -7   1  945.61   53.79
   9  -7   1  776.92   53.09
   9  -7   1  938.01   52.99
  -9  -7  -1  868.01   52.19
   9  -7   1  872.61   53.19
  -9   7  -1  843.82   52.89
   9   7   1  988.50   51.89
  -9   7  -1  872.21   51.59
   9   7   1  996.50   52.89
   9   7   1  957.30   51.89
   9   7   1  772.42   53.59
  10  -7   1   38.00    5.30
  10  -7   1   39.40    5.40
  10  -7   1   26.10    4.80
  10  -7   1   35.10    4.40
 -10  -7  -1   40.40    4.00
 -10   7  -1   35.50    5.00
  10   7   1   27.00    5.30
  10   7   1   38.90    3.80
  10   7   1   40.70    3.60
  10   7   1   42.50    4.90
  11  -7   1   43.50    6.50
  11  -7   1   63.99    5.60
  11  -7   1   49.90    7.30
  11   7   1   56.09    4.50
  11   7   1   59.89    5.10
  11   7   1   58.69    6.00
  11   7   1   48.70    7.30
  12  -7   1  185.58   15.30
  12  -7   1  220.38   14.50
  12  -7   1  221.78   15.60
  12   7   1  199.48   16.50
  12   7   1  213.58   15.00
  12   7   1  229.98   14.10
  13  -7   1   75.89    8.40
  13  -7   1   91.89    8.60
  13  -7   1   80.79    7.30
  13   7   1   97.79    8.30
  13   7   1   89.89    7.00
  13   7   1   56.59    9.50
  14  -7   1    4.60    2.60
  14  -7   1    5.10    3.20
  14  -7   1    2.40    2.80
  14   7   1    3.30    2.10
  14   7   1    2.20    2.80
  14   7   1    3.50    4.70
  15  -7   1    5.20    3.40
  15  -7   1    3.80    2.70
  15  -7   1    9.50    3.00
  15   7   1    7.40    3.30
  15   7   1   11.90    2.90
  15   7   1   10.30    5.30
  16  -7   1    8.20    3.40
  16  -7   1    7.40    3.60
  16  -7   1    8.40    2.80
  16   7   1    4.30    3.20
  16   7   1    1.80    2.60
  16   7   1    2.50    4.60
  17  -7   1    7.30    2.30
  17  -7   1   -0.40    3.50
  17  -7   1    1.00    3.20
  17   7   1    6.80    3.40
  17   7   1    0.00    4.40
  17   7   1   -1.80    2.40
  18  -7   1   23.00    5.10
  18   7   1   24.70    6.80
  18   7   1   14.90    4.20
  18   7   1   25.00    5.40
  18  -8  -1   79.79    9.40
  18  -8  -1   78.29   10.50
  18   8  -1   72.49    9.50
  18   8  -1   68.49    7.50
  18   8  -1   48.50    9.90
  17  -8  -1    5.90    2.80
  17  -8  -1    0.30    2.70
  17   8  -1    4.80    2.60
  17   8  -1   10.70    5.50
  17   8  -1    3.40    3.70
  16  -8  -1   28.00    5.90
  16  -8  -1   36.60    5.30
  16  -8  -1   28.10    5.60
  16   8  -1   26.60    4.60
  16   8  -1   37.80    6.00
  16   8  -1   30.40    7.10
  15  -8  -1    5.70    2.60
  15  -8  -1    2.30    3.30
  15  -8  -1    3.30    3.10
  15   8  -1    4.20    2.50
  15   8  -1   15.70    3.80
  15   8  -1    5.90    4.50
  14  -8  -1   66.19    7.90
  14  -8  -1   44.40    7.00
  14  -8  -1   76.69    7.00
  14   8  -1   77.89    9.80
  14   8  -1   67.59    7.60
  14   8  -1   69.79    6.50
  13  -8  -1  154.88   13.30
  13  -8  -1  162.18   13.50
  13  -8  -1  174.18   12.40
  13   8  -1  186.48   15.10
  13   8  -1  174.48   11.90
  13   8  -1  171.78   13.20
  12  -8  -1  396.06   25.70
 -12  -8   1  382.06   24.40
  12  -8  -1  389.46   25.90
  12  -8  -1  404.56   24.80
  12   8  -1  400.86   25.40
  12   8  -1  415.46   27.00
  12   8  -1  388.46   23.60
 -12   8   1  373.86   23.60
  12   8  -1  407.26   24.20
  11  -8  -1  275.57   17.90
  11  -8  -1  238.68   17.40
  11  -8  -1  261.17   16.70
  11  -8  -1  234.58   17.20
  11   8  -1  258.27   18.50
  11   8  -1  267.27   16.10
  11   8  -1  236.18   17.00
 -11   8   1  235.68   15.80
  11   8  -1  262.57   15.80
 -10  -8   1  158.48    9.50
  10  -8  -1  138.79   11.20
  10  -8  -1  140.59   11.00
 -10  -8   1  133.19    9.90
 -10  -8   1  133.89    9.30
  10   8  -1  184.58   12.80
 -10   8   1  143.39   10.00
  10   8  -1  141.99   10.90
  10   8  -1  152.58   10.00
  10   8  -1  145.89    9.80
   9  -8  -1   47.90    5.50
   9  -8  -1   50.59    5.20
  -9  -8   1   44.90    4.10
   9  -8  -1   47.60    5.40
  -9  -8   1   40.40    3.90
   9  -8  -1   45.10    5.20
   9  -8  -1   38.20    4.60
  -9  -8   1   41.00    4.10
   9   8  -1   38.00    5.10
  -9   8   1   45.40    3.60
   9   8  -1   49.90    4.30
   9   8  -1   48.90    4.30
   9   8  -1   54.29    7.10
  -9   8   1   45.40    4.40
  -9   8   1   41.00    4.80
  -8  -8   1    3.50    1.30
   8  -8  -1    6.20    2.50
  -8  -8   1    2.90    1.70
   8  -8  -1    6.30    2.00
   8  -8  -1    1.60    1.50
  -8   8   1    1.70    1.50
   8   8  -1    4.30    2.10
  -8   8   1    3.50    1.10
  -8   8   1    3.80    1.20
   8   8  -1    2.90    1.50
   8   8  -1    6.00    2.40
  -8   8   1    1.70    1.30
   8   8  -1    3.90    1.50
   7  -8  -1  618.24   36.10
  -7  -8   1  594.44   35.40
  -7  -8   1  597.04   35.00
  -7  -8   1  627.24   35.50
   7  -8  -1  622.84   36.40
   7  -8  -1  577.54   35.70
   7  -8  -1  610.54   36.10
   7  -8  -1  575.84   36.40
   7  -8  -1  634.14   36.10
  -7   8   1  604.24   34.80
  -7   8   1  626.74   34.70
   7   8  -1  609.54   36.20
  -7   8   1  603.14   35.80
   7   8  -1  594.64   35.10
   7   8  -1  621.44   35.50
  -7   8   1  651.23   36.20
   7   8  -1  569.04   36.60
   7   8  -1  646.94   36.20
  -7   8   1  599.14   36.60
  -7   8   1  584.24   35.90
  -7   8   1  606.64   36.00
   6  -8  -1  307.07   19.80
   6  -8  -1  288.57   19.40
   6  -8  -1  319.87   19.70
  -6  -8   1  341.47   19.40
  -6  -8   1  306.97   19.20
  -6  -8   1  313.77   19.40
   6  -8  -1  292.87   20.00
   6  -8  -1  299.27   19.60
  -6  -8   1  334.37   18.80
  -6   8   1  339.07   18.90
   6   8  -1  281.57   20.00
  -6   8   1  325.37   19.70
  -6   8   1  320.77   19.60
  -6   8   1  306.57   19.50
  -6   8   1  318.67   18.60
  -6   8   1  319.67   20.20
   6   8  -1  313.87   19.20
   6   8  -1  361.66   19.00
  -6   8   1  329.97   19.70
   6   8  -1  341.67   20.00
   6   8  -1  322.87   19.80
   5  -8  -1   87.89    7.10
  -5  -8   1  100.99    6.90
   5  -8  -1   92.09    7.00
  -5  -8   1   93.99    6.80
  -5  -8   1   97.59    6.80
  -5  -8   1  102.89    6.10
   5  -8  -1   76.99    6.70
   5  -8  -1   99.39    6.90
  -5  -8   1   92.69    7.40
  -5  -8   1   94.99    5.70
   5  -8  -1   90.59    7.30
  -5   8   1  106.99    7.20
  -5   8   1  103.79    7.50
   5   8  -1   88.29    7.40
   5   8  -1  100.09    7.30
   5   8  -1   89.89    7.00
  -5   8   1   97.49    7.00
  -5   8   1   97.19    6.40
  -5   8   1  100.79    7.00
  -5   8   1   84.99    6.80
  -5   8   1   96.29    6.30
   5   8  -1   88.19    6.60
  -4  -8   1    7.30    1.90
  -4  -8   1    9.00    1.90
   4  -8  -1    5.90    1.70
   4  -8  -1    5.80    1.90
  -4  -8   1   12.00    2.50
   4  -8  -1    7.70    1.90
   4  -8  -1    7.90    1.70
  -4  -8   1    9.30    1.30
  -4  -8   1    7.40    1.90
  -4  -8   1    7.80    1.20
   4  -8  -1    5.90    1.60
   4   8  -1   11.10    2.00
   4   8  -1    4.60    2.00
  -4   8   1    9.10    1.80
  -4   8   1   10.20    1.90
  -4   8   1    7.80    1.80
   4   8  -1    7.40    2.00
  -4   8   1    9.10    1.90
  -4   8   1   11.50    2.50
  -4   8   1   11.10    2.10
   4   8  -1    7.20    1.40
   4   8  -1    7.30    2.00
  -4   8   1    9.50    2.00
   3  -8  -1 2337.77  148.59
  -3  -8   1 2749.62  148.09
   3  -8  -1 2701.13  149.09
  -3  -8   1 2762.42  149.19
  -3  -8   1 2635.04  148.09
   3  -8  -1 2418.86  149.09
  -3  -8   1 2896.21  148.99
   3  -8  -1 2668.43  148.89
   3  -8  -1 2771.22  148.79
  -3  -8   1 2455.55  148.79
  -3  -8   1 2443.16  148.69
   3  -8  -1 2894.51  149.09
  -3   8   1 2319.27  148.79
  -3   8   1 2616.64  148.49
   3   8  -1 2537.75  148.89
  -3   8   1 2567.94  148.89
   3   8  -1 2301.17  148.79
  -3   8   1 2771.12  149.19
  -3   8   1 2825.92  148.59
   3   8  -1 2743.23  148.39
   3   8  -1 2672.53  148.69
  -3   8   1 2670.83  148.79
  -3   8   1 2692.53  148.99
  -3   8   1 2904.61  149.19
   3   8  -1 2783.12  148.99
   2  -8  -1 1300.57   70.29
   2  -8  -1 1320.37   70.59
  -2  -8   1 1217.18   69.69
  -2  -8   1 1303.17   70.19
   2  -8  -1 1065.79   69.89
  -2  -8   1 1109.99   70.19
   2  -8  -1 1338.67   70.19
   2  -8  -1 1086.49   70.29
   2  -8  -1 1190.88   69.99
  -2  -8   1 1378.96   70.49
   2   8  -1 1251.07   70.79
   2   8  -1 1141.79   70.19
  -2   8   1 1309.37   69.99
  -2   8   1 1142.79   70.19
  -2   8   1 1322.07   70.49
   2   8  -1 1061.29   69.99
   2   8  -1 1270.67   69.89
   2   8  -1 1326.57   70.39
  -2   8   1 1107.39   69.99
   2   8  -1 1376.66   70.19
  -2   8   1 1325.67   70.09
   1  -8  -1   42.30    4.00
   1  -8  -1   43.10    3.60
   1  -8  -1   40.90    3.30
   1  -8  -1   32.40    3.60
   1  -8  -1   44.10    3.70
  -1  -8   1   34.40    3.20
  -1  -8   1   32.30    3.40
  -1  -8   1   43.30    3.70
   1   8  -1   37.70    3.50
   1   8  -1   42.40    3.70
   1   8  -1   35.20    3.60
  -1   8   1   41.60    3.50
  -1   8   1   40.80    3.70
  -1   8   1   36.10    3.40
  -1   8   1   38.40    3.80
   1   8  -1   40.20    4.00
  -1   8   1   37.80    3.60
   1   8  -1   39.10    3.50
   0  -8   1   72.29    6.10
   0  -8   1   87.79    6.30
   0  -8  -1   76.49    5.60
   0  -8   1   90.09    6.20
   0  -8   1   83.99    6.00
   0  -8   1   75.59    5.80
   0  -8  -1   84.09    5.50
   0  -8  -1   92.79    6.10
   0  -8   1   72.89    5.90
   0  -8  -1   84.49    6.60
   0   8  -1   96.49    6.20
   0   8   1   87.29    6.00
   0   8  -1   75.19    6.00
   0   8   1   82.39    5.70
   0   8  -1   91.39    6.20
   0   8   1   96.79    6.30
   0   8  -1   94.59    6.00
   0   8  -1   75.79    6.10
   1  -8   1 1721.53   93.89
  -1  -8  -1 1862.81   93.09
   1  -8   1 1500.05   93.89
   1  -8   1 1806.52   93.79
  -1  -8  -1 1547.75   93.79
  -1  -8  -1 1540.05   93.29
   1  -8   1 1830.12   93.99
   1  -8   1 1602.34   93.69
  -1  -8  -1 1706.93   93.89
  -1   8  -1 1812.22   93.99
  -1   8  -1 1626.74   93.69
   1   8   1 1667.63   93.39
   1   8   1 1581.34   94.39
   1   8   1 1762.62   93.89
  -1   8  -1 1793.02   93.99
  -1   8  -1 1693.73   93.59
   1   8   1 1765.62   93.79
  -1   8  -1 1480.55   93.69
   1   8   1 1515.15   93.69
   1   8   1 1574.24   93.79
  -1   8  -1 1463.25   93.59
  -2  -8  -1 1763.92  100.49
  -2  -8  -1 1917.41  101.29
   2  -8   1 1775.32  101.29
  -2  -8  -1 1689.43  100.89
   2  -8   1 1988.20  101.29
   2  -8   1 1911.81  100.99
   2  -8   1 1557.04  100.89
   2  -8   1 1857.21  101.09
   2  -8   1 1715.33  101.19
   2  -8   1 1730.83  100.79
  -2  -8  -1 1918.31  100.89
   2   8   1 1849.02  101.09
  -2   8  -1 1919.51  101.19
   2   8   1 1678.53  101.09
   2   8   1 1619.44  101.69
  -2   8  -1 1853.61  101.19
  -2   8  -1 1850.51  100.79
   2   8   1 1857.81  100.99
  -2   8  -1 1792.72  100.89
   2   8   1 1715.63  100.99
  -2   8  -1 1608.44  100.89
   2   8   1 1782.12  100.49
   3  -8   1    5.60    1.80
   3  -8   1    4.00    1.40
   3  -8   1    7.40    1.80
  -3  -8  -1    5.20    1.10
  -3  -8  -1    6.90    1.70
   3  -8   1    4.50    1.40
  -3  -8  -1    7.30    1.50
   3  -8   1    2.70    1.50
  -3  -8  -1    5.90    1.50
   3  -8   1    2.80    1.10
   3  -8   1    4.30    1.50
  -3   8  -1    5.20    1.60
   3   8   1    4.30    1.50
   3   8   1    4.90    1.50
   3   8   1    4.50    1.60
  -3   8  -1    6.30    1.90
  -3   8  -1    3.80    1.30
  -3   8  -1    6.30    1.70
  -3   8  -1    5.80    1.40
   3   8   1    5.30    1.20
   3   8   1    2.90    1.60
  -4  -8  -1   30.50    3.00
  -4  -8  -1   32.60    2.90
   4  -8   1   30.70    3.50
   4  -8   1   26.20    2.90
   4  -8   1   28.70    3.20
   4  -8   1   30.20    3.20
   4  -8   1   28.40    3.10
  -4  -8  -1   31.30    3.70
  -4   8  -1   34.60    3.30
   4   8   1   33.00    2.50
   4   8   1   28.90    3.10
  -4   8  -1   27.40    3.00
   4   8   1   30.70    3.30
  -4   8  -1   33.30    3.60
   4   8   1   28.90    3.30
  -4   8  -1   33.50    3.00
  -4   8  -1   26.60    3.40
   4   8   1   22.70    3.60
  -5  -8  -1  309.97   17.90
   5  -8   1  297.27   18.40
  -5  -8  -1  323.77   17.40
   5  -8   1  293.07   19.00
   5  -8   1  286.87   18.80
   5  -8   1  315.57   18.10
   5  -8   1  270.57   18.40
   5  -8   1  312.97   18.70
  -5  -8  -1  315.27   17.90
  -5   8  -1  270.67   18.80
  -5   8  -1  303.87   18.00
   5   8   1  270.87   18.90
  -5   8  -1  317.67   18.40
   5   8   1  310.07   18.20
  -5   8  -1  304.67   18.80
  -5   8  -1  316.27   18.40
   5   8   1  299.87   18.30
   5   8   1  300.07   18.40
  -6  -8  -1   52.39    3.80
  -6  -8  -1   49.00    4.00
   6  -8   1   55.19    4.30
   6  -8   1   45.60    4.70
   6  -8   1   57.39    5.20
  -6  -8  -1   53.19    3.90
   6  -8   1   51.79    4.60
   6   8   1   51.59    3.70
  -6   8  -1   55.69    4.70
  -6   8  -1   54.99    4.60
  -6   8  -1   52.29    5.20
  -6   8  -1   50.79    4.40
   6   8   1   42.70    5.20
   6   8   1   60.59    5.00
   6   8   1   51.29    4.40
  -6   8  -1   53.09    5.10
   7  -8   1   84.89    7.30
  -7  -8  -1   89.59    6.10
   7  -8   1   95.89    7.50
   7  -8   1   92.99    7.20
   7  -8   1   80.89    6.90
   7  -8   1   91.09    6.90
   7  -8   1   85.89    7.60
   7   8   1   86.49    6.90
  -7   8  -1   96.39    6.20
   7   8   1   77.69    7.80
  -7   8  -1   93.19    6.60
   7   8   1   91.49    7.40
  -7   8  -1   88.49    7.60
   7   8   1   93.59    6.60
   7   8   1   96.69    6.10
  -8  -8  -1  329.37   20.50
   8  -8   1  332.97   22.00
   8  -8   1  363.16   22.00
   8  -8   1  352.36   21.30
   8  -8   1  355.76   22.00
   8  -8   1  346.17   22.00
   8   8   1  369.76   20.40
  -8   8  -1  332.07   20.60
  -8   8  -1  341.87   21.70
   8   8   1  333.07   21.60
   8   8   1  340.47   21.30
  -8   8  -1  338.67   22.10
   8   8   1  346.57   20.60
  -8   8  -1  335.57   20.20
   9  -8   1   44.80    5.10
  -9  -8  -1   44.90    4.10
   9  -8   1   48.60    4.70
   9  -8   1   35.30    5.50
   9  -8   1   41.90    4.60
   9  -8   1   41.10    5.00
  -9   8  -1   43.70    4.90
  -9   8  -1   40.00    3.80
   9   8   1   40.90    4.90
   9   8   1   31.50    5.40
   9   8   1   41.90    4.00
   9   8   1   46.00    3.90
  10  -8   1   23.10    3.90
  10  -8   1   19.80    4.10
  10  -8   1   15.40    4.10
  10   8   1   17.50    2.80
  10   8   1   18.70    3.60
 -10   8  -1   17.60    2.40
  10   8   1   18.60    2.70
  10   8   1   15.40    4.20
  11  -8   1   34.50    5.30
  11  -8   1   34.80    4.60
  11  -8   1   33.70    5.40
  11   8   1   37.90    5.30
  11   8   1   35.50    3.90
  11   8   1   25.40    5.20
  11   8   1   31.90    3.50
  12  -8   1   45.30    6.20
  12  -8   1   44.00    5.20
  12  -8   1   29.50    5.40
  12   8   1   35.40    6.90
  12   8   1   41.80    4.50
  12   8   1   57.59    6.90
  12   8   1   44.70    3.90
  13  -8   1  244.48   17.30
  13  -8   1  218.28   17.00
  13  -8   1  248.98   16.20
  13   8   1  233.48   18.60
  13   8   1  238.18   16.30
  13   8   1  231.08   16.50
  14  -8   1   44.10    8.40
  14  -8   1   63.89    7.30
  14  -8   1   62.29    6.40
  14   8   1   68.49    7.10
  14   8   1   62.89   10.10
  14   8   1   54.79    5.60
  15  -8   1  119.69   11.00
  15  -8   1  114.29   11.20
  15  -8   1  123.49    9.80
  15   8   1  115.99   10.60
  15   8   1  117.29    9.30
  15   8   1  150.98   13.70
  16  -8   1    2.40    2.30
  16  -8   1    5.00    3.10
  16  -8   1   13.70    4.10
  16   8   1    7.20    2.80
  16   8   1   16.90    4.10
  16   8   1    4.20    5.00
  17  -8   1  106.69    9.20
  17  -8   1  111.99   11.20
  17  -8   1  122.59   11.10
  17   8   1   98.09   11.10
  17   8   1  100.89   13.50
  17   8   1  102.49    8.90
  18  -9  -1   57.09    9.20
  18  -9  -1   44.40    9.80
  18   9  -1   63.79    8.60
  18   9  -1   47.70    9.80
  17  -9  -1    4.90    4.00
  17  -9  -1    7.00    3.10
  17   9  -1    5.90    5.50
  17   9  -1    1.50    2.70
  17   9  -1   -1.40    3.00
  16  -9  -1   -2.40    2.80
  16  -9  -1   -0.50    2.80
  16  -9  -1   -0.30    1.80
  16   9  -1    0.10    2.10
  16   9  -1    3.60    2.40
  16   9  -1   -3.40    3.70
  15  -9  -1   28.60    4.80
  15  -9  -1   28.20    5.60
  15  -9  -1   32.40    6.30
  15   9  -1   30.90    4.70
  15   9  -1   32.40    7.90
  15   9  -1   32.60    5.80
  14  -9  -1   10.10    3.70
  14  -9  -1   21.90    4.30
  14  -9  -1    9.00    3.80
  14   9  -1   11.40    3.70
  14   9  -1   10.20    2.90
  13  -9  -1   26.30    4.60
  13  -9  -1   30.20    5.40
  13  -9  -1   21.60    4.90
  13   9  -1   23.50    6.20
  13   9  -1   25.30    5.20
  13   9  -1   27.70    4.00
  13   9  -1   20.70    3.10
 -12  -9   1  371.76   23.80
  12  -9  -1  382.46   24.30
  12  -9  -1  407.76   25.80
  12  -9  -1  379.26   25.20
  12   9  -1  410.76   26.50
  12   9  -1  383.46   23.50
 -12   9   1  365.76   23.20
  12   9  -1  387.86   23.30
  12   9  -1  380.96   24.80
  11  -9  -1  146.49   10.50
  11  -9  -1  136.39   10.80
 -11  -9   1  132.49    9.70
  11  -9  -1  129.49   11.10
  11  -9  -1  161.28   11.80
  11   9  -1  147.79    9.70
 -11   9   1  121.39    9.50
  11   9  -1  135.39    9.50
  11   9  -1  139.79   12.20
  11   9  -1  132.99   11.10
 -10  -9   1  903.51   53.99
  10  -9  -1 1014.50   56.09
 -10  -9   1  934.51   53.49
  10  -9  -1  999.40   55.49
  10  -9  -1 1015.60   54.89
  10  -9  -1  921.91   55.49
 -10  -9   1  841.62   53.39
  10   9  -1  978.70   53.89
  10   9  -1  871.21   53.99
  10   9  -1  889.21   54.99
 -10   9   1  891.21   54.19
  10   9  -1 1007.90   56.59
  -9  -9   1  241.68   14.40
  -9  -9   1  226.28   14.30
   9  -9  -1  217.58   15.20
   9  -9  -1  232.28   15.80
   9  -9  -1  241.68   16.20
   9   9  -1  227.88   16.40
  -9   9   1  226.98   13.70
   9   9  -1  219.18   15.30
  -9   9   1  217.58   13.40
  -9   9   1  213.98   14.70
   9   9  -1  242.58   14.40
   9   9  -1  231.78   14.60
   8  -9  -1   12.20    3.20
  -8  -9   1    9.20    2.10
  -8  -9   1    9.40    1.90
   8  -9  -1    9.20    2.60
  -8  -9   1   11.30    2.40
   8  -9  -1   11.10    3.10
   8  -9  -1    6.00    2.20
   8  -9  -1    9.70    2.30
  -8   9   1   15.50    3.10
  -8   9   1   11.30    1.80
   8   9  -1    8.40    2.90
  -8   9   1   10.60    2.40
   8   9  -1    9.30    3.40
  -8   9   1   11.90    1.60
   8   9  -1    7.50    2.20
   8   9  -1   11.90    2.10
  -7  -9   1   14.30    2.60
   7  -9  -1   11.00    2.90
  -7  -9   1   18.00    2.60
   7  -9  -1   10.60    2.30
   7  -9  -1   19.10    3.60
  -7  -9   1   13.90    2.00
   7  -9  -1   15.80    2.80
   7  -9  -1    9.00    2.20
  -7   9   1   16.40    2.90
  -7   9   1   16.10    3.30
  -7   9   1   12.00    2.80
  -7   9   1   17.60    2.30
  -7   9   1   16.50    2.00
  -7   9   1   18.10    3.00
  -7   9   1   17.70    3.50
   7   9  -1    9.00    3.10
   7   9  -1   11.70    2.70
   7   9  -1   12.90    2.90
   7   9  -1   17.30    2.60
  -6  -9   1   41.30    4.00
   6  -9  -1   30.50    3.70
   6  -9  -1   36.40    4.10
   6  -9  -1   25.10    3.90
   6  -9  -1   37.50    4.00
  -6  -9   1   33.90    3.70
   6  -9  -1   37.00    3.80
  -6  -9   1   32.90    3.50
  -6  -9   1   33.20    2.80
   6   9  -1   36.60    4.20
  -6   9   1   42.20    4.00
  -6   9   1   36.10    3.80
  -6   9   1   32.60    2.90
   6   9  -1   34.90    3.50
  -6   9   1   34.20    3.80
   6   9  -1   32.60    4.80
  -6   9   1   32.50    3.10
  -6   9   1   33.90    3.80
   5  -9  -1  160.68   10.80
   5  -9  -1  137.89   10.80
  -5  -9   1  161.28   10.50
  -5  -9   1  160.48   11.10
   5  -9  -1  159.78   10.50
  -5  -9   1  157.88   10.40
  -5  -9   1  160.88    9.50
  -5  -9   1  150.68   10.50
  -5  -9   1  149.79    9.30
   5  -9  -1  155.98   10.70
   5  -9  -1  135.39   10.30
   5   9  -1  162.88   10.40
  -5   9   1  163.78   10.10
  -5   9   1  163.68   11.10
   5   9  -1  155.98   10.80
  -5   9   1  173.38   10.60
  -5   9   1  175.78   10.80
   5   9  -1  149.39   11.00
   5   9  -1  145.39   10.60
  -5   9   1  158.18   10.00
  -5   9   1  161.38   10.60
  -5   9   1  171.68   10.70
  -4  -9   1  406.46   24.30
  -4  -9   1  410.46   23.40
  -4  -9   1  429.06   24.90
   4  -9  -1  402.86   24.60
   4  -9  -1  426.26   24.60
   4  -9  -1  406.46   24.60
  -4  -9   1  414.46   24.50
   4  -9  -1  412.96   24.40
  -4  -9   1  420.76   24.50
   4  -9  -1  373.96   24.80
  -4  -9   1  398.16   23.40
  -4   9   1  414.06   24.20
  -4   9   1  398.86   24.40
  -4   9   1  406.16   24.60
   4   9  -1  407.56   24.20
  -4   9   1  408.96   24.20
   4   9  -1  356.16   24.40
  -4   9   1  424.66   24.90
   4   9  -1  414.96   23.80
  -4   9   1  421.56   24.00
   4   9  -1  416.66   24.70
  -4   9   1  423.36   24.50
   4   9  -1  399.96   24.50
   3  -9  -1  187.98   12.40
   3  -9  -1  209.68   12.30
   3  -9  -1  214.68   12.50
   3  -9  -1  193.28   12.60
  -3  -9   1  196.68   12.60
  -3  -9   1  193.78   11.60
  -3  -9   1  174.28   12.20
  -3  -9   1  202.38   12.50
   3  -9  -1  177.48   12.10
  -3  -9   1  213.98   12.40
  -3  -9   1  201.28   11.50
   3  -9  -1  162.58   12.50
   3   9  -1  209.38   12.60
  -3   9   1  202.68   12.60
  -3   9   1  188.18   12.40
  -3   9   1  162.98   12.20
  -3   9   1  196.48   12.00
  -3   9   1  207.78   12.10
   3   9  -1  178.78   12.40
   3   9  -1  171.68   12.40
   3   9  -1  203.78   12.00
   3   9  -1  197.98   12.20
  -3   9   1  189.98   12.30
   2  -9  -1    2.10    1.40
   2  -9  -1    1.10    1.10
   2  -9  -1    2.70    1.40
  -2  -9   1    2.70    1.50
  -2  -9   1    2.30    1.10
  -2  -9   1    2.90    1.50
   2  -9  -1    3.20    1.60
  -2  -9   1    3.70    1.60
   2  -9  -1    1.60    1.30
   2  -9  -1    0.90    1.40
  -2  -9   1    1.00    1.30
   2   9  -1    2.00    1.80
   2   9  -1    2.70    1.60
  -2   9   1    0.60    1.40
  -2   9   1    3.20    1.40
  -2   9   1    1.90    1.40
  -2   9   1    2.80    1.40
  -2   9   1    2.40    1.30
   2   9  -1    1.00    1.20
   2   9  -1    1.60    1.50
   2   9  -1    1.40    1.30
   2   9  -1    1.20    1.20
   1  -9  -1  485.75   26.60
   1  -9  -1  484.25   26.50
   1  -9  -1  473.35   27.00
  -1  -9   1  475.25   26.60
  -1  -9   1  442.96   26.10
   1  -9  -1  456.95   26.20
   1  -9  -1  423.16   26.20
  -1  -9   1  408.16   26.60
   1  -9  -1  402.06   26.60
  -1  -9   1  483.95   26.60
  -1   9   1  437.56   26.80
  -1   9   1  489.55   26.80
   1   9  -1  470.95   26.40
  -1   9   1  455.05   26.30
   1   9  -1  487.65   26.70
   1   9  -1  498.55   26.50
   1   9  -1  406.46   26.50
   1   9  -1  391.56   26.30
   1   9  -1  438.96   26.90
  -1   9   1  463.15   26.40
  -1   9   1  398.56   26.40
  -1   9   1  411.16   26.30
   0  -9   1 1899.61  100.49
   0  -9   1 1562.34  100.39
   0  -9  -1 1914.71  100.39
   0  -9   1 1726.63  100.09
   0  -9  -1 1844.62   99.79
   0  -9   1 1532.85  100.09
   0  -9  -1 1608.04  100.39
   0  -9   1 1844.02  100.59
   0  -9  -1 1859.01  100.99
   0  -9   1 1892.21  100.29
   0  -9  -1 1944.01  100.39
   0  -9  -1 1669.43   99.89
   0   9   1 1906.81  100.49
   0   9   1 1820.72  100.09
   0   9  -1 1862.21  100.19
   0   9   1 1618.14  100.19
   0   9  -1 1774.82  100.49
   0   9   1 1938.71  100.39
   0   9   1 1549.05  100.09
   0   9   1 1792.72  100.79
   0   9  -1 1795.42  100.29
   0   9  -1 1937.51  100.59
   0   9  -1 1520.45  100.19
   1  -9   1  626.94   35.50
   1  -9   1  571.84   35.50
  -1  -9  -1  642.74   35.40
  -1  -9  -1  680.83   34.70
   1  -9   1  647.94   35.40
   1  -9   1  625.74   35.30
  -1  -9  -1  646.84   35.30
  -1  -9  -1  577.24   35.30
  -1  -9  -1  554.24   34.70
   1   9   1  587.34   35.30
   1   9   1  591.24   36.00
  -1   9  -1  595.64   35.20
  -1   9  -1  631.24   35.10
   1   9   1  607.34   35.30
  -1   9  -1  643.74   35.50
   1   9   1  614.94   34.90
  -1   9  -1  536.05   35.10
   1   9   1  542.45   35.20
  -1   9  -1  537.15   35.20
  -1   9  -1  654.83   35.50
   1   9   1  634.14   35.40
   2  -9   1 1439.16   78.09
   2  -9   1 1383.26   78.19
   2  -9   1 1188.18   77.69
   2  -9   1 1237.58   78.09
   2  -9   1 1375.36   77.99
  -2  -9  -1 1459.15   77.79
  -2  -9  -1 1432.86   78.19
  -2  -9  -1 1483.95   76.89
  -2  -9  -1 1368.06   77.89
   2  -9   1 1421.26   77.89
  -2  -9  -1 1319.47   77.29
   2  -9   1 1282.07   77.79
  -2   9  -1 1336.77   77.69
   2   9   1 1426.06   77.89
   2   9   1 1417.26   77.99
   2   9   1 1317.27   77.89
  -2   9  -1 1430.96   78.19
   2   9   1 1197.08   77.79
  -2   9  -1 1465.55   78.09
   2   9   1 1374.86   77.69
  -2   9  -1 1446.26   77.79
   3  -9   1 1810.82  104.59
   3  -9   1 1928.21  105.29
  -3  -9  -1 1931.01  104.69
   3  -9   1 1922.21  104.79
   3  -9   1 1730.83  104.99
   3  -9   1 1567.04  104.59
   3  -9   1 1903.91  104.79
   3  -9   1 1943.41  104.99
  -3  -9  -1 1937.01  105.19
  -3  -9  -1 1870.21  104.09
   3   9   1 1826.62  104.69
  -3   9  -1 1742.53  104.89
  -3   9  -1 1915.61  104.49
   3   9   1 1631.04  104.89
  -3   9  -1 1981.10  104.89
   3   9   1 1859.31  104.79
  -3   9  -1 1808.42  104.99
   3   9   1 1745.63  105.79
  -3   9  -1 1844.32  104.49
   3   9   1 2034.70  104.19
  -3   9  -1 1980.10  105.19
   3   9   1 1830.12  104.79
   4  -9   1 2317.47  133.59
   4  -9   1 2438.06  133.29
   4  -9   1 2293.87  133.09
   4  -9   1 2027.20  132.99
   4  -9   1 2382.86  132.89
  -4  -9  -1 2383.36  132.29
   4  -9   1 2497.25  133.79
  -4  -9  -1 2421.76  132.79
  -4  -9  -1 2437.96  133.69
  -4  -9  -1 2466.35  132.89
   4  -9   1 2401.86  133.19
  -4   9  -1 2331.37  132.79
  -4   9  -1 2443.26  133.19
   4   9   1 2300.87  132.99
   4   9   1 2278.37  133.09
   4   9   1 2005.10  133.29
  -4   9  -1 2419.26  132.89
  -4   9  -1 2495.95  132.39
  -4   9  -1 2334.77  133.49
  -4   9  -1 2379.36  133.39
   4   9   1 2329.47  132.99
   4   9   1 2511.05  132.29
   5  -9   1   58.89    5.00
   5  -9   1   61.89    5.60
   5  -9   1   52.39    5.40
   5  -9   1   53.09    5.10
   5  -9   1   56.19    5.00
   5  -9   1   58.79    5.00
  -5  -9  -1   64.49    4.80
  -5  -9  -1   60.89    5.60
  -5  -9  -1   63.89    4.60
   5  -9   1   68.59    4.90
   5   9   1   57.09    5.00
  -5   9  -1   60.09    4.90
  -5   9  -1   62.39    5.00
   5   9   1   63.99    5.20
   5   9   1   63.69    4.90
  -5   9  -1   58.19    5.40
   5   9   1   47.50    5.50
  -5   9  -1   59.19    4.70
   5   9   1   59.79    4.00
  -5   9  -1   55.49    5.40
   6  -9   1  551.64   34.70
  -6  -9  -1  583.94   33.90
   6  -9   1  594.24   34.70
  -6  -9  -1  600.54   33.60
   6  -9   1  583.44   35.20
  -6  -9  -1  620.64   34.00
   6  -9   1  568.54   35.40
   6  -9   1  608.44   35.00
  -6   9  -1  571.74   35.30
  -6   9  -1  610.14   34.70
  -6   9  -1  599.54   34.20
   6   9   1  607.84   34.40
   6   9   1  506.05   35.20
   6   9   1  624.44   34.80
  -6   9  -1  593.64   34.50
  -7  -9  -1    6.80    1.50
   7  -9   1    3.70    1.90
   7  -9   1    8.80    2.30
   7  -9   1    8.40    3.20
   7  -9   1   10.70    2.50
  -7  -9  -1    6.10    1.50
  -7  -9  -1    7.90    1.40
   7  -9   1    9.60    2.70
   7   9   1    5.70    1.80
   7   9   1    3.20    2.40
  -7   9  -1    6.60    1.60
   7   9   1    6.50    2.20
  -7   9  -1    5.50    1.90
   7   9   1   10.50    1.60
  -7   9  -1    4.60    2.20
  -7   9  -1    7.90    2.60
  -8  -9  -1    0.70    1.00
   8  -9   1   -0.10    2.00
   8  -9   1    1.10    1.40
   8  -9   1   -1.10    1.50
   8  -9   1    0.40    1.80
   8   9   1   -1.40    1.00
   8   9   1    0.10    2.20
  -8   9  -1    0.60    1.60
  -8   9  -1    2.30    2.00
  -8   9  -1    0.60    1.30
   8   9   1    0.70    1.30
   8   9   1    1.60    1.90
   9  -9   1 1133.09   65.99
  -9  -9  -1 1025.60   64.19
   9  -9   1 1145.69   65.99
   9  -9   1 1173.38   65.59
   9  -9   1 1198.88   65.39
   9  -9   1 1102.89   66.09
   9   9   1 1233.28   64.19
   9   9   1  976.50   66.19
  -9   9  -1 1087.79   64.29
   9   9   1 1129.19   64.49
   9   9   1 1190.68   65.39
  10  -9   1  185.88   14.40
  10  -9   1  220.38   13.80
  10   9   1  207.78   12.40
  10   9   1  199.78   12.70
  10   9   1  199.08   13.60
 -10   9  -1  184.98   12.30
  10   9   1  167.68   14.80
  11  -9   1    9.00    3.30
  11  -9   1    8.50    2.60
  11  -9   1    4.80    3.00
  11   9   1    4.80    3.50
  11   9   1   11.10    2.10
  11   9   1    4.40    1.80
  11   9   1    6.80    2.90
  12  -9   1  139.29   10.60
  12  -9   1  132.29   11.60
  12  -9   1  134.89   11.40
  12   9   1  134.59    9.30
  12   9   1  131.39   12.60
  12   9   1  150.58    9.70
  12   9   1  137.59   11.00
  13  -9   1  514.45   31.60
  13  -9   1  486.95   30.10
  13  -9   1  463.05   31.30
  13   9   1  504.35   30.70
  13   9   1  445.16   32.20
  13   9   1  494.45   29.10
  14  -9   1   64.89    6.60
  14  -9   1   56.69    7.80
  14  -9   1   60.49    8.20
  14   9   1   45.80    8.20
  14   9   1   62.29    5.80
  14   9   1   60.39    7.00
  15  -9   1   -0.30    2.40
  15  -9   1    3.00    2.90
  15  -9   1    2.10    2.40
  15   9   1    3.10    2.20
  15   9   1    4.60    2.70
  15   9   1   -1.30    4.10
  16  -9   1   24.30    6.10
  16  -9   1   37.60    5.40
  16   9   1   40.90    6.10
  16   9   1   45.90    8.70
  16   9   1   33.00    4.80
  17  -9   1    4.80    3.30
  17  -9   1    1.20    3.10
  17  -9   1    5.60    3.10
  17   9   1   -0.20    3.60
  17   9   1   -5.10    4.10
  17   9   1    1.20    2.40
  18 -10  -1  113.79   11.40
  18 -10  -1   88.29   10.90
  18  10  -1  107.79   10.60
  18  10  -1  110.79   14.00
  17 -10  -1   46.00    7.50
  17 -10  -1   58.39    8.40
  17  10  -1   41.90    8.30
  17  10  -1   40.70    5.60
  17  10  -1   48.60    7.50
  16 -10  -1    2.80    2.90
  16 -10  -1    4.30    3.20
  16 -10  -1    3.70    3.20
  16  10  -1    7.80    2.90
  16  10  -1   -1.40    2.30
  16  10  -1    8.30    4.90
  15 -10  -1    9.50    3.90
  15 -10  -1    8.40    3.40
  15 -10  -1    8.40    3.40
  15  10  -1   11.70    3.60
  15  10  -1    1.90    4.10
  15  10  -1   10.00    2.80
  14 -10  -1    4.90    3.50
  14 -10  -1    8.30    3.30
  14 -10  -1    6.70    3.30
  14  10  -1   10.20    5.20
  14  10  -1    6.80    3.30
  14  10  -1    5.60    2.50
  13 -10  -1   21.20    4.50
  13 -10  -1   22.90    4.50
  13 -10  -1   19.00    4.60
  13  10  -1   19.30    3.80
  13  10  -1   18.10    4.50
  13  10  -1   16.40    3.00
  13  10  -1   28.50    6.70
  12 -10  -1   -1.20    2.50
  12 -10  -1    1.70    2.80
 -12 -10   1    0.00    1.70
  12 -10  -1    1.20    1.70
  12  10  -1   -0.90    1.60
  12  10  -1    1.50    1.90
  12  10  -1    1.20    2.40
  12  10  -1   -0.80    2.80
 -12  10   1    1.90    1.80
  11 -10  -1   74.39    7.20
  11 -10  -1   55.69    6.10
  11 -10  -1   60.29    7.00
  11 -10  -1   52.29    6.00
 -11 -10   1   46.80    4.90
  11  10  -1   69.79    7.90
  11  10  -1   47.80    5.10
  11  10  -1   62.49    5.30
  11  10  -1   50.79    6.20
 -11  10   1   53.19    5.20
 -10 -10   1   11.40    2.00
 -10 -10   1   12.90    2.30
  10 -10  -1   13.70    4.10
  10 -10  -1   11.00    3.00
 -10 -10   1   15.10    2.50
  10 -10  -1   11.30    3.30
 -10  10   1   14.90    2.90
  10  10  -1    9.60    3.30
  10  10  -1   13.40    2.50
  10  10  -1   13.80    2.70
  10  10  -1    7.30    3.70
   9 -10  -1   22.70    4.40
  -9 -10   1   22.10    3.00
  -9 -10   1   30.90    3.70
   9 -10  -1   23.20    4.20
  -9 -10   1   24.10    2.90
   9 -10  -1   24.30    3.80
  -9  10   1   21.20    3.50
  -9  10   1   22.90    2.60
   9  10  -1   26.90    3.60
   9  10  -1   24.90    5.20
   9  10  -1   29.00    3.40
   9  10  -1   30.40    4.50
   8 -10  -1   17.80    3.00
   8 -10  -1   26.50    4.60
   8 -10  -1   23.00    4.10
  -8 -10   1   18.90    2.50
  -8 -10   1   26.70    3.60
  -8 -10   1   23.40    3.20
  -8  10   1   19.90    2.00
  -8  10   1   19.30    3.40
  -8  10   1   21.80    2.70
   8  10  -1   20.90    4.50
   8  10  -1   22.80    4.00
  -8  10   1   20.30    3.50
   8  10  -1   20.10    3.10
   7 -10  -1   -0.70    1.50
   7 -10  -1   -1.10    1.70
   7 -10  -1    0.30    1.70
  -7 -10   1    2.00    1.40
  -7 -10   1    1.20    1.60
   7 -10  -1    0.70    1.40
  -7 -10   1    2.90    1.00
   7  10  -1    1.90    1.80
  -7  10   1    0.70    1.50
   7  10  -1    4.30    1.80
  -7  10   1   -0.10    1.00
  -7  10   1    1.80    0.90
  -7  10   1   -1.50    1.30
   7  10  -1   -0.60    2.30
  -7  10   1    1.50    1.60
   7  10  -1   -1.50    1.80
  -7  10   1    2.10    1.60
   6 -10  -1 1624.94   90.89
  -6 -10   1 1641.94   89.69
  -6 -10   1 1548.35   90.49
   6 -10  -1 1683.03   91.29
   6 -10  -1 1601.14   91.09
  -6 -10   1 1652.13   90.69
  -6 -10   1 1544.75   90.79
   6 -10  -1 1438.36   91.29
  -6  10   1 1696.13   90.89
  -6  10   1 1494.65   90.79
  -6  10   1 1609.74   90.99
   6  10  -1 1544.75   90.99
   6  10  -1 1537.25   91.39
  -6  10   1 1593.84   90.89
   6  10  -1 1542.65   91.09
   6  10  -1 1673.83   90.59
  -6  10   1 1621.44   89.89
  -6  10   1 1614.64   90.09
   5 -10  -1   68.39    5.80
   5 -10  -1   76.09    6.20
  -5 -10   1   75.99    6.60
   5 -10  -1   73.59    6.10
  -5 -10   1   76.19    4.80
  -5 -10   1   71.49    5.90
   5 -10  -1   78.49    6.30
  -5 -10   1   73.59    5.80
   5 -10  -1   63.39    5.90
   5 -10  -1   71.29    6.50
  -5 -10   1   77.29    4.90
  -5 -10   1   75.79    6.10
  -5  10   1   78.79    6.20
   5  10  -1   71.59    5.70
   5  10  -1   70.69    6.20
  -5  10   1   70.69    5.90
   5  10  -1   62.89    6.10
  -5  10   1   76.39    5.60
  -5  10   1   72.59    6.00
  -5  10   1   82.89    6.00
  -5  10   1   72.39    5.40
   4 -10  -1  742.23   43.70
  -4 -10   1  752.12   43.90
   4 -10  -1  629.44   43.60
  -4 -10   1  760.62   43.50
   4 -10  -1  800.42   43.60
  -4 -10   1  788.22   43.50
  -4 -10   1  710.83   42.30
  -4 -10   1  766.02   42.30
  -4 -10   1  769.92   43.40
   4 -10  -1  668.93   43.20
   4 -10  -1  777.52   43.40
   4 -10  -1  747.73   43.50
  -4  10   1  791.12   43.50
   4  10  -1  783.82   43.60
  -4  10   1  770.02   43.70
   4  10  -1  720.73   43.20
   4  10  -1  689.03   43.40
  -4  10   1  808.22   43.20
   4  10  -1  678.03   43.50
  -4  10   1  767.22   43.30
   4  10  -1  759.22   42.80
  -4  10   1  779.62   42.90
  -4  10   1  700.23   43.30
  -3 -10   1   19.80    2.70
  -3 -10   1   16.30    1.90
   3 -10  -1   18.90    2.80
   3 -10  -1   16.80    2.70
   3 -10  -1   11.10    2.50
   3 -10  -1   11.60    2.30
  -3 -10   1   24.20    3.50
  -3 -10   1   15.70    2.90
  -3 -10   1   20.00    3.00
   3 -10  -1   25.90    3.40
   3 -10  -1   15.70    2.60
  -3 -10   1   16.00    2.10
   3  10  -1   14.60    3.30
  -3  10   1   12.40    2.30
  -3  10   1   15.10    2.30
   3  10  -1   17.50    2.50
  -3  10   1   17.40    2.30
   3  10  -1   20.70    2.90
  -3  10   1   15.80    2.50
  -3  10   1   22.10    3.40
   3  10  -1   13.20    2.60
   3  10  -1   12.10    2.50
  -3  10   1   15.30    2.70
   3  10  -1   17.70    2.80
   2 -10  -1  935.51   53.09
  -2 -10   1  818.82   53.19
  -2 -10   1  993.40   52.79
  -2 -10   1  888.41   53.39
  -2 -10   1  980.50   53.29
   2 -10  -1  854.51   52.99
   2 -10  -1  999.50   53.19
   2 -10  -1  906.01   53.59
   2 -10  -1  831.02   53.49
   2 -10  -1  979.50   53.39
  -2 -10   1 1002.50   53.59
   2  10  -1  925.91   53.29
  -2  10   1 1015.20   53.59
   2  10  -1  942.01   52.99
   2  10  -1  927.61   53.09
  -2  10   1  985.70   53.29
   2  10  -1  838.62   53.09
   2  10  -1  835.32   53.29
  -2  10   1  824.82   52.99
  -2  10   1  959.00   53.49
  -2  10   1  955.80   52.99
   2  10  -1  977.20   54.09
  -1 -10   1   25.40    3.20
   1 -10  -1   23.90    2.80
  -1 -10   1   24.20    2.90
  -1 -10   1   27.40    3.50
   1 -10  -1   15.10    3.00
   1 -10  -1   25.20    2.70
   1 -10  -1   20.50    2.60
  -1 -10   1   16.80    2.70
   1 -10  -1   25.30    3.80
   1 -10  -1   25.40    2.90
  -1 -10   1   17.20    2.90
   1  10  -1   12.90    2.40
   1  10  -1   23.70    2.90
  -1  10   1   25.60    3.20
   1  10  -1   23.30    2.90
   1  10  -1   26.10    2.90
  -1  10   1   17.70    2.90
  -1  10   1   14.30    2.40
  -1  10   1   22.50    3.30
   1  10  -1   19.90    3.10
  -1  10   1   19.10    2.60
  -1  10   1   18.30    3.00
   0 -10   1  618.34   35.20
   0 -10   1  616.74   34.70
   0 -10   1  627.34   34.90
   0 -10  -1  596.64   35.50
   0 -10  -1  668.93   35.00
   0 -10  -1  593.04   35.10
   0 -10   1  539.95   34.80
   0 -10   1  628.74   35.00
   0 -10  -1  603.14   34.50
   0 -10  -1  625.04   34.90
   0 -10  -1  648.34   34.30
   0  10  -1  615.94   34.70
   0  10  -1  629.44   35.10
   0  10   1  499.95   34.50
   0  10   1  615.34   35.00
   0  10   1  516.55   34.70
   0  10   1  613.04   35.40
   0  10  -1  580.34   34.80
   0  10   1  590.14   34.70
   0  10  -1  626.24   35.10
   0  10  -1  526.05   34.80
   0  10   1  547.05   34.50
   1 -10   1 1599.94   89.79
   1 -10   1 1617.14   89.69
   1 -10   1 1615.64   89.69
   1 -10   1 1421.06   89.39
  -1 -10  -1 1568.14   89.09
  -1 -10  -1 1719.23   88.79
  -1 -10  -1 1693.13   89.59
  -1 -10  -1 1625.74   89.79
   1 -10   1 1401.36   89.69
   1 -10   1 1693.33   89.59
   1 -10   1 1518.25   89.39
  -1 -10  -1 1628.34   89.69
  -1  10  -1 1592.94   89.59
  -1  10  -1 1403.96   89.49
  -1  10  -1 1623.04   89.39
  -1  10  -1 1757.42   89.89
   1  10   1 1678.23   89.19
   1  10   1 1508.85   90.19
   1  10   1 1626.24   89.69
   1  10   1 1437.36   89.39
  -1  10  -1 1467.65   89.39
   1  10   1 1482.55   89.59
   1  10   1 1641.94   89.49
  -1  10  -1 1549.24   89.59
   2 -10   1 1844.42  102.29
   2 -10   1 1920.21  102.29
   2 -10   1 1743.23  101.99
  -2 -10  -1 1914.41  102.19
   2 -10   1 1858.11  101.99
   2 -10   1 1720.03  101.99
  -2 -10  -1 1783.12  101.49
  -2 -10  -1 1876.31  102.39
   2 -10   1 1604.04  102.29
  -2 -10  -1 1882.91  100.99
  -2 -10  -1 1891.31  101.99
   2 -10   1 1885.01  102.39
   2  10   1 1741.93  102.89
  -2  10  -1 1870.81  102.19
   2  10   1 1831.12  101.59
   2  10   1 1795.12  102.09
   2  10   1 1878.41  102.09
   2  10   1 1725.13  102.09
   2  10   1 1525.45  101.89
  -2  10  -1 1696.23  101.99
  -2  10  -1 1790.22  101.79
  -2  10  -1 1782.32  101.89
  -2  10  -1 1886.51  102.29
  -3 -10  -1  362.16   20.60
   3 -10   1  305.87   21.20
  -3 -10  -1  362.26   21.30
  -3 -10  -1  360.46   21.80
   3 -10   1  346.17   21.20
  -3 -10  -1  357.56   21.10
   3 -10   1  372.76   21.50
   3 -10   1  361.76   21.50
   3 -10   1  349.47   21.70
   3 -10   1  324.67   21.60
   3 -10   1  359.26   21.30
  -3  10  -1  350.96   21.60
  -3  10  -1  351.96   21.50
  -3  10  -1  334.17   21.40
   3  10   1  343.87   22.40
   3  10   1  335.57   21.30
   3  10   1  316.17   21.40
  -3  10  -1  357.06   21.10
  -3  10  -1  380.36   21.50
   3  10   1  379.16   21.10
  -3  10  -1  355.36   21.10
   3  10   1  367.36   21.40
   3  10   1  363.16   21.30
  -4 -10  -1   52.59    3.80
  -4 -10  -1   54.29    5.10
   4 -10   1   51.39    5.10
   4 -10   1   57.69    4.70
  -4 -10  -1   48.30    4.20
  -4 -10  -1   56.59    4.50
   4 -10   1   45.80    4.90
   4 -10   1   55.89    4.60
   4 -10   1   45.20    4.50
   4 -10   1   47.20    4.40
   4  10   1   43.80    4.60
   4  10   1   53.29    6.10
   4  10   1   51.49    4.60
  -4  10  -1   56.89    4.40
  -4  10  -1   48.60    4.80
   4  10   1   59.09    4.00
  -4  10  -1   47.40    3.90
   4  10   1   42.50    4.30
  -4  10  -1   43.20    4.70
  -4  10  -1   46.50    4.50
  -4  10  -1   47.40    4.30
  -5 -10  -1   59.69    5.60
  -5 -10  -1   59.09    4.70
   5 -10   1   56.59    5.00
   5 -10   1   42.20    4.90
  -5 -10  -1   57.29    4.50
   5 -10   1   53.39    5.50
   5 -10   1   65.09    5.00
   5 -10   1   52.59    5.40
   5 -10   1   59.09    5.10
  -5  10  -1   54.29    4.60
  -5  10  -1   59.29    4.80
   5  10   1   49.50    5.60
   5  10   1   55.69    5.20
  -5  10  -1   55.69    4.90
   5  10   1   56.09    4.80
   5  10   1   58.19    4.00
   5  10   1   61.39    5.20
  -5  10  -1   57.39    5.50
   6 -10   1  408.56   24.40
   6 -10   1  429.66   25.10
   6 -10   1  411.36   24.20
  -6 -10  -1  391.46   23.40
   6 -10   1  379.16   24.20
  -6 -10  -1  401.56   23.40
   6 -10   1  395.26   24.80
   6 -10   1  341.57   24.00
  -6  10  -1  407.76   24.00
  -6  10  -1  396.76   23.60
   6  10   1  406.06   24.10
   6  10   1  338.87   24.60
   6  10   1  426.86   24.30
  -6  10  -1  380.46   24.50
  -6  10  -1  415.76   24.80
   6  10   1  411.36   23.90
  -6  10  -1  407.86   24.10
   7 -10   1  411.86   28.60
  -7 -10  -1  481.45   27.40
   7 -10   1  513.25   29.60
  -7 -10  -1  507.15   27.70
  -7 -10  -1  482.45   27.60
   7 -10   1  469.65   28.70
   7 -10   1  510.95   29.80
  -7  10  -1  489.05   29.30
  -7  10  -1  488.45   29.50
   7  10   1  429.66   29.40
   7  10   1  495.55   28.30
  -7  10  -1  464.15   28.30
   7  10   1  456.55   28.70
  -7  10  -1  468.75   28.00
   8 -10   1  415.36   25.60
   8 -10   1  407.36   25.50
   8 -10   1  441.16   26.50
  -8 -10  -1  405.46   24.20
   8 -10   1  464.65   26.50
   8  10   1  426.46   24.90
   8  10   1  370.46   26.30
   8  10   1  402.56   25.40
  -8  10  -1  393.16   24.80
  -8  10  -1  394.06   24.50
  -8  10  -1  456.05   26.50
   9 -10   1   43.30    5.90
   9 -10   1   34.30    4.50
   9 -10   1   25.80    4.80
   9  10   1   29.00    3.50
  -9  10  -1   27.60    3.60
   9  10   1   28.20    3.00
   9  10   1   22.90    5.10
  -9  10  -1   30.30    4.70
  -9  10  -1   26.50    3.30
   9  10   1   26.00    4.20
  10 -10   1   51.79    6.90
  10 -10   1   58.89    6.80
  10 -10   1   61.09    5.90
  10  10   1   54.59    5.80
  10  10   1   50.79    4.30
 -10  10  -1   47.80    4.40
  10  10   1   39.30    6.50
  10  10   1   44.40    4.70
  11 -10   1  202.78   14.70
  11 -10   1  210.78   13.60
  11 -10   1  194.38   14.40
  11  10   1  175.68   12.40
  11  10   1  204.08   14.00
  11  10   1  174.18   14.90
  11  10   1  202.78   12.20
 -11  10  -1  166.08   11.70
  12 -10   1  238.28   17.90
  12 -10   1  244.98   16.80
  12 -10   1  230.88   17.70
  12  10   1  234.18   18.80
  12  10   1  256.37   15.60
  12  10   1  264.47   17.40
  12  10   1  252.17   15.80
  13 -10   1   81.09    7.70
  13 -10   1   93.09    9.00
  13  10   1   75.19    6.40
  13  10   1   70.69   10.40
  13  10   1   88.89    8.50
  13  10   1   82.39    6.70
  14 -10   1   16.90    4.40
  14 -10   1   14.70    3.80
  14 -10   1   13.60    4.20
  14  10   1   12.40    3.60
  14  10   1   14.70    5.40
  15 -10   1   52.49    5.90
  15 -10   1   56.99    7.90
  15 -10   1   40.90    6.90
  15  10   1   52.99    5.40
  15  10   1   51.79    7.30
  15  10   1   45.70    8.80
  16 -10   1   10.90    4.70
  16 -10   1   21.80    4.70
  16 -10   1   19.70    4.90
  16  10   1    9.70    4.10
  16  10   1   12.40    3.20
  16  10   1    7.00    5.50
  17 -10   1    9.30    4.40
  17 -10   1    7.70    3.90
  17 -10   1    0.50    2.80
  17  10   1    5.30    4.90
  17  10   1    5.80    4.00
  17 -11  -1  119.69   11.90
  17 -11  -1  136.99   12.70
  17 -11  -1  129.69   11.30
  17  11  -1  131.59   14.60
  17  11  -1  127.09   11.90
  16 -11  -1   18.80    5.20
  16 -11  -1   24.60    5.70
  16 -11  -1   21.40    5.50
  16  11  -1   18.80    7.80
  16  11  -1   13.00    5.90
  15 -11  -1   11.00    4.20
  15 -11  -1   10.80    3.60
  15 -11  -1   11.40    4.70
  15  11  -1    2.90    4.30
  15  11  -1    7.60    3.90
  14 -11  -1    4.10    3.10
  14 -11  -1    6.10    2.70
  14 -11  -1    2.20    3.20
  14  11  -1    5.90    4.50
  14  11  -1    7.10    3.20
  13 -11  -1  139.09   11.90
  13 -11  -1  122.89   10.60
 -13 -11   1  128.99   10.00
  13 -11  -1  126.69   11.70
  13  11  -1  133.99   13.00
  13  11  -1  143.09    9.80
  13  11  -1  147.19   11.60
  13  11  -1  117.89    9.70
  12 -11  -1  560.54   33.30
  12 -11  -1  500.95   32.00
  12 -11  -1  504.05   33.20
 -12  11   1  483.95   30.90
  12  11  -1  485.55   31.60
  12  11  -1  528.15   32.60
  12  11  -1  576.44   34.30
  11 -11  -1  329.67   21.80
 -11 -11   1  314.67   19.80
  11 -11  -1  372.76   21.40
  11 -11  -1  351.06   22.40
  11  11  -1  300.27   20.10
  11  11  -1  296.27   21.10
 -11  11   1  295.17   20.00
  11  11  -1  328.97   22.60
  10 -11  -1  310.17   20.60
 -10 -11   1  285.27   18.20
  10 -11  -1  348.67   20.70
 -10 -11   1  278.97   18.10
 -10 -11   1  271.17   18.10
  10 -11  -1  315.17   19.60
  10  11  -1  287.17   19.70
  10  11  -1  325.97   21.20
  10  11  -1  288.17   18.70
 -10  11   1  310.27   19.00
 -10  11   1  286.67   17.70
  -9 -11   1  153.98   10.40
   9 -11  -1  178.28   12.90
   9 -11  -1  175.28   12.00
   9 -11  -1  167.28   12.40
  -9 -11   1  153.88   10.80
  -9 -11   1  153.48   10.70
   9  11  -1  162.58   12.10
   9  11  -1  170.38   11.90
   9  11  -1  194.18   13.60
  -9  11   1  150.98   11.30
  -9  11   1  161.18   10.40
   8 -11  -1  328.47   23.10
   8 -11  -1  322.97   21.40
  -8 -11   1  349.67   21.00
   8 -11  -1  391.66   22.50
  -8 -11   1  328.07   20.80
  -8 -11   1  327.17   20.20
   8 -11  -1  334.17   21.80
  -8  11   1  319.37   21.20
   8  11  -1  384.66   22.20
  -8  11   1  339.57   21.50
   8  11  -1  379.66   22.90
  -8  11   1  337.87   20.40
  -8  11   1  319.87   21.50
  -7 -11   1  186.58   12.40
  -7 -11   1  201.38   12.60
  -7 -11   1  180.88   11.60
   7 -11  -1  186.48   13.00
   7 -11  -1  175.78   13.50
   7 -11  -1  214.38   13.70
   7  11  -1  194.48   12.60
  -7  11   1  188.98   12.80
   7  11  -1  193.98   13.80
  -7  11   1  183.58   11.50
  -7  11   1  170.88   12.70
  -7  11   1  184.78   11.90
   7  11  -1  207.08   13.40
  -6 -11   1   30.30    4.40
   6 -11  -1   35.10    4.90
   6 -11  -1   34.90    4.20
  -6 -11   1   36.00    2.70
   6 -11  -1   30.20    4.50
  -6 -11   1   33.10    3.70
  -6 -11   1   37.20    4.10
  -6 -11   1   36.30    2.80
   6 -11  -1   23.50    3.70
   6 -11  -1   31.10    3.80
  -6  11   1   32.50    4.00
  -6  11   1   40.00    3.50
  -6  11   1   40.10    4.10
  -6  11   1   30.50    3.30
  -6  11   1   32.00    4.40
   6  11  -1   36.10    3.90
  -6  11   1   33.00    4.00
   6  11  -1   36.50    4.40
   6  11  -1   37.50    4.80
   5 -11  -1  958.40   56.09
  -5 -11   1  956.50   56.29
   5 -11  -1  957.90   56.39
  -5 -11   1  996.10   56.19
  -5 -11   1  994.10   54.89
   5 -11  -1  833.92   56.49
   5 -11  -1 1004.50   56.39
  -5 -11   1  987.60   54.89
  -5 -11   1  997.70   55.99
   5 -11  -1 1024.30   56.49
  -5 -11   1  996.20   56.89
   5 -11  -1  819.62   55.89
   5  11  -1  989.30   55.99
  -5  11   1 1012.80   56.19
  -5  11   1  973.10   56.29
  -5  11   1 1029.20   56.09
   5  11  -1  977.90   55.29
  -5  11   1  895.01   56.09
   5  11  -1  923.81   56.29
   5  11  -1  933.41   56.49
   5  11  -1 1065.79   56.69
  -5  11   1  989.60   55.59
  -5  11   1 1007.50   55.79
  -4 -11   1  665.43   37.30
  -4 -11   1  619.74   35.90
   4 -11  -1  617.84   37.30
   4 -11  -1  563.34   36.90
  -4 -11   1  646.24   37.10
   4 -11  -1  610.74   37.40
  -4 -11   1  637.64   37.30
  -4 -11   1  605.34   37.50
   4 -11  -1  653.73   37.30
   4 -11  -1  606.94   37.00
  -4 -11   1  622.74   36.10
  -4  11   1  683.63   37.30
   4  11  -1  668.43   37.40
   4  11  -1  607.74   36.90
  -4  11   1  641.14   37.40
  -4  11   1  587.04   37.10
   4  11  -1  593.64   37.30
  -4  11   1  642.04   36.70
   4  11  -1  670.63   36.60
   4  11  -1  590.84   37.30
  -4  11   1  647.04   37.20
  -4  11   1  710.23   37.10
   3 -11  -1  294.17   17.60
  -3 -11   1  281.37   18.00
  -3 -11   1  299.17   18.00
   3 -11  -1  296.97   17.90
   3 -11  -1  308.07   17.80
  -3 -11   1  276.17   17.80
  -3 -11   1  275.17   16.90
   3 -11  -1  282.57   18.10
   3 -11  -1  239.78   17.90
  -3 -11   1  304.07   17.80
  -3 -11   1  294.07   16.80
   3 -11  -1  266.97   17.50
  -3  11   1  288.47   17.40
  -3  11   1  290.37   18.00
   3  11  -1  307.17   18.80
   3  11  -1  279.37   17.30
  -3  11   1  290.47   17.70
  -3  11   1  302.87   17.90
   3  11  -1  259.97   17.80
  -3  11   1  238.68   17.50
   3  11  -1  290.17   17.90
   3  11  -1  292.47   17.60
   2 -11  -1   31.60    3.50
   2 -11  -1   30.20    3.30
   2 -11  -1   33.60    3.40
   2 -11  -1   24.00    3.70
  -2 -11   1   32.20    4.30
   2 -11  -1   34.90    4.50
  -2 -11   1   37.20    4.50
  -2 -11   1   31.40    3.00
  -2 -11   1   19.70    3.00
  -2 -11   1   30.30    3.80
   2 -11  -1   26.90    3.30
  -2  11   1   30.30    3.90
   2  11  -1   30.00    3.70
   2  11  -1   28.80    3.90
   2  11  -1   19.90    3.50
   2  11  -1   29.70    3.30
  -2  11   1   32.70    3.30
  -2  11   1   27.20    3.70
   2  11  -1   30.40    3.50
  -2  11   1   32.00    3.40
   2  11  -1   36.40    5.00
  -1 -11   1  358.96   25.30
   1 -11  -1  459.35   25.10
  -1 -11   1  416.86   25.00
   1 -11  -1  431.96   26.00
   1 -11  -1  444.96   25.50
  -1 -11   1  451.75   25.60
  -1 -11   1  447.86   25.60
   1 -11  -1  382.56   25.60
  -1 -11   1  398.26   25.60
   1 -11  -1  423.46   25.10
   1 -11  -1  440.96   25.40
   1  11  -1  422.96   25.20
   1  11  -1  482.15   26.20
  -1  11   1  378.36   25.40
  -1  11   1  477.95   26.10
  -1  11   1  434.46   25.30
  -1  11   1  376.76   25.20
   1  11  -1  451.65   25.70
   1  11  -1  384.46   25.50
   1  11  -1  414.06   25.30
  -1  11   1  434.46   25.60
  -1  11   1  456.05   25.30
   1  11  -1  395.96   25.30
   0 -11   1 2762.42  150.28
   0 -11  -1 2749.62  149.88
   0 -11  -1 2645.14  150.58
   0 -11   1 2402.86  150.48
   0 -11   1 2810.52  150.48
   0 -11  -1 2762.12  150.28
   0 -11   1 2802.82  150.08
   0 -11  -1 2735.13  151.08
   0 -11   1 2315.67  150.18
   0 -11  -1 2716.43  149.59
   0 -11  -1 2678.23  150.28
   0  11   1 2807.22  150.58
   0  11  -1 2420.46  150.08
   0  11   1 2685.93  150.18
   0  11  -1 2593.54  150.28
   0  11  -1 2832.32  150.48
   0  11   1 2340.37  149.99
   0  11  -1 2744.23  150.18
   0  11   1 2877.21  150.08
   0  11   1 2327.37  150.18
   0  11  -1 2750.62  150.58
   0  11   1 2881.61  151.08
  -1 -11  -1   45.60    4.40
   1 -11   1   34.20    4.40
  -1 -11  -1   49.30    4.40
   1 -11   1   48.20    4.50
  -1 -11  -1   50.19    4.00
  -1 -11  -1   52.29    3.60
   1 -11   1   48.80    4.40
   1 -11   1   39.60    4.40
  -1 -11  -1   44.90    4.50
   1 -11   1   50.39    4.30
   1 -11   1   44.50    4.60
   1 -11   1   47.70    4.30
  -1  11  -1   48.00    4.30
  -1  11  -1   48.90    4.50
   1  11   1   43.20    4.00
  -1  11  -1   41.40    4.30
  -1  11  -1   42.30    4.40
   1  11   1   45.20    4.20
   1  11   1   51.09    5.30
   1  11   1   48.90    4.50
  -1  11  -1   59.89    4.80
   1  11   1   43.50    4.50
  -1  11  -1   38.50    4.40
   2 -11   1  188.68   11.60
  -2 -11  -1  183.68   11.60
   2 -11   1  165.38   11.30
  -2 -11  -1  166.48   10.70
  -2 -11  -1  186.58   11.60
   2 -11   1  167.48   11.40
   2 -11   1  169.48   11.20
  -2 -11  -1  179.18   11.20
   2 -11   1  178.58   11.60
   2 -11   1  156.08   11.20
   2  11   1  177.08   11.30
   2  11   1  164.88   10.80
  -2  11  -1  185.48   11.70
   2  11   1  163.98   11.30
   2  11   1  144.09   11.20
   2  11   1  167.88   11.40
  -2  11  -1  173.48   11.20
  -2  11  -1  166.78   11.00
  -2  11  -1  161.48   11.20
   2  11   1  179.78   12.30
  -2  11  -1  173.18   11.50
   3 -11   1   43.30    4.80
  -3 -11  -1   47.50    4.50
   3 -11   1   51.09    4.80
  -3 -11  -1   45.60    4.10
  -3 -11  -1   42.10    4.50
   3 -11   1   48.60    4.30
   3 -11   1   41.40    4.30
   3 -11   1   37.00    4.20
   3 -11   1   40.60    4.40
   3 -11   1   49.80    4.50
  -3 -11  -1   45.90    3.70
   3  11   1   49.00    3.90
   3  11   1   48.00    5.60
  -3  11  -1   45.00    4.20
  -3  11  -1   48.10    4.40
   3  11   1   50.19    4.50
   3  11   1   45.90    4.20
  -3  11  -1   40.40    4.30
  -3  11  -1   52.09    4.80
  -3  11  -1   42.60    4.00
   3  11   1   39.40    4.50
   3  11   1   45.70    4.50
  -3  11  -1   42.00    4.30
   4 -11   1   27.50    3.60
  -4 -11  -1   17.80    2.40
   4 -11   1   23.50    3.50
   4 -11   1   28.20    4.00
  -4 -11  -1   27.00    3.00
   4 -11   1   24.30    3.60
   4 -11   1   19.00    3.40
  -4 -11  -1   26.50    3.50
  -4  11  -1   27.90    3.60
   4  11   1   25.40    3.10
   4  11   1   32.40    3.60
   4  11   1   23.70    4.70
  -4  11  -1   28.00    3.10
   4  11   1   25.10    2.60
  -4  11  -1   20.30    3.70
  -4  11  -1   25.10    3.80
  -4  11  -1   23.50    2.90
   4  11   1   18.60    3.30
   4  11   1   17.20    3.30
  -4  11  -1   28.20    3.10
   5 -11   1   60.59    5.10
   5 -11   1   61.59    5.20
   5 -11   1   42.10    5.10
  -5 -11  -1   57.79    5.60
  -5 -11  -1   55.19    4.60
   5 -11   1   53.99    5.70
   5 -11   1   55.99    5.30
  -5 -11  -1   55.39    4.80
   5 -11   1   64.19    6.00
   5 -11   1   66.59    5.30
  -5  11  -1   53.99    4.70
   5  11   1   45.00    5.60
  -5  11  -1   62.29    5.20
   5  11   1   57.89    5.50
  -5  11  -1   59.09    5.50
   5  11   1   58.29    5.00
   5  11   1   55.69    4.20
  -5  11  -1   53.09    4.90
  -5  11  -1   56.69    5.50
   5  11   1   65.19    5.40
  -6 -11  -1  119.59    8.00
   6 -11   1  100.09    8.60
   6 -11   1  117.69    8.80
  -6 -11  -1  123.19    8.00
   6 -11   1  114.39    8.60
   6 -11   1  125.29    9.40
   6 -11   1  118.69    9.40
  -6  11  -1  114.89    8.50
  -6  11  -1  116.09    8.40
   6  11   1  123.29    8.90
  -6  11  -1  113.29    9.00
  -6  11  -1  114.99    9.10
   6  11   1  122.89    8.40
   6  11   1   97.49    9.20
  -6  11  -1  112.59    8.10
   6  11   1  122.29    8.70
   7 -11   1  193.48   12.80
  -7 -11  -1  206.18   11.90
   7 -11   1  198.58   13.60
   7 -11   1  163.28   12.60
  -7 -11  -1  186.58   11.70
   7 -11   1  199.98   13.70
  -7  11  -1  174.38   12.50
   7  11   1  164.98   13.50
   7  11   1  173.18   12.70
   7  11   1  175.18   12.70
  -7  11  -1  190.18   12.40
  -7  11  -1  211.88   13.70
  -7  11  -1  193.18   12.10
   8 -11   1   61.69    5.60
   8 -11   1   67.39    6.70
   8 -11   1   56.49    5.80
  -8 -11  -1   56.69    4.20
   8 -11   1   61.99    6.60
  -8  11  -1   57.79    5.30
   8  11   1   41.60    6.40
   8  11   1   58.89    5.80
   8  11   1   57.29    5.60
  -8  11  -1   63.29    6.40
  -8  11  -1   53.59    4.70
   9 -11   1  308.07   19.70
   9 -11   1  347.27   20.90
   9 -11   1  354.76   20.90
   9  11   1  296.17   20.80
  -9  11  -1  286.67   18.70
   9  11   1  291.77   19.50
   9  11   1  269.37   18.70
  -9  11  -1  287.17   18.30
  -9  11  -1  315.07   20.40
  10 -11   1  122.89    9.70
  10 -11   1  126.69   10.30
  10 -11   1  108.79   10.30
  10  11   1  109.49   10.80
  10  11   1  125.79    9.60
 -10  11  -1  121.99    8.40
  10  11   1  112.69    8.60
  11 -11   1    9.50    3.10
  11 -11   1    8.90    3.60
  11 -11   1    5.90    3.20
  11  11   1    5.30    2.70
  11  11   1   13.40    2.40
  11  11   1   13.00    2.60
  11  11   1   10.90    4.20
  12 -11   1  975.00   58.29
  12 -11   1  966.20   57.09
  12 -11   1  931.31   58.09
  12  11   1  898.81   58.79
  12  11   1 1039.80   55.59
  12  11   1  920.11   56.09
  12  11   1 1014.50   57.49
  13 -11   1  119.39   12.50
  13 -11   1  113.19    9.80
  13 -11   1  119.39   10.90
  13  11   1  125.59    8.70
  13  11   1  112.79   13.60
  13  11   1  121.09   10.50
  14 -11   1   16.50    3.80
  14 -11   1    9.70    3.70
  14 -11   1    6.50    3.30
  14  11   1    8.60    2.60
  14  11   1    5.00    4.70
  14  11   1   14.50    4.20
  15 -11   1   -1.10    2.70
  15 -11   1    2.00    2.40
  15 -11   1    8.20    3.70
  15  11   1   -1.20    2.30
  15  11   1    4.20    4.10
  16 -11   1  207.88   17.00
  16 -11   1  217.18   15.80
  16 -11   1  224.08   17.50
  16  11   1  218.48   16.50
  16  11   1  220.08   19.30
  17 -11   1    9.90    3.80
  17 -11   1    6.80    3.10
  17 -11   1    4.60    6.40
  17  11   1   13.20    5.90
  17  11   1    8.90    3.90
  17 -12  -1  262.87   20.80
  17 -12  -1  260.17   20.80
  17 -12  -1  276.57   19.30
  17  12  -1  333.77   29.30
  17  12  -1  252.27   19.70
  16 -12  -1   15.60    4.20
  16 -12  -1   20.20    5.30
  16 -12  -1   18.70    5.30
  16  12  -1   18.80    6.50
  16  12  -1   15.40    4.60
  15 -12  -1   41.10    6.50
  15 -12  -1   45.20    7.50
  15 -12  -1   53.89    7.90
  15  12  -1   44.00    7.00
  15  12  -1   39.90    8.10
  14 -12  -1    7.30    3.70
  14 -12  -1    2.90    2.50
  14 -12  -1    1.50    3.30
  14  12  -1   10.00    4.90
  14  12  -1    0.30    2.90
  13 -12  -1  164.08   13.50
  13 -12  -1  134.79   12.00
  13 -12  -1  148.99   13.40
  13  12  -1  185.38   15.20
  13  12  -1  163.38   12.90
  12 -12  -1   52.49    7.30
 -12 -12   1   33.20    4.20
  12 -12  -1   36.10    6.10
  12 -12  -1   52.29    6.00
 -12  12   1   44.20    4.80
  12  12  -1   39.00    5.10
  12  12  -1   48.20    8.00
  12  12  -1   45.20    6.50
  11 -12  -1    2.90    2.80
 -11 -12   1   -0.10    1.30
  11 -12  -1    5.40    2.80
  11 -12  -1   -0.10    2.10
  11  12  -1   -2.10    1.80
  11  12  -1   -3.20    2.20
  11  12  -1   -1.20    3.00
 -10 -12   1    6.60    2.10
 -10 -12   1    9.40    2.00
 -10 -12   1   13.50    2.50
  10 -12  -1   10.60    3.30
  10 -12  -1   10.60    3.60
  10 -12  -1    8.70    3.20
  10  12  -1    8.00    4.10
 -10  12   1   11.30    2.10
  10  12  -1    9.50    3.30
  10  12  -1    9.90    2.80
 -10  12   1   10.70    2.90
  -9 -12   1  275.67   17.20
  -9 -12   1  293.37   17.90
   9 -12  -1  284.57   18.80
   9 -12  -1  286.57   19.80
   9 -12  -1  312.97   19.60
  -9 -12   1  261.17   17.70
  -9  12   1  278.47   18.40
   9  12  -1  271.67   18.20
  -9  12   1  294.27   19.00
   9  12  -1  327.57   20.50
   9  12  -1  284.37   19.10
  -9  12   1  288.17   17.50
  -8 -12   1  150.18    9.90
  -8 -12   1  150.48   10.80
   8 -12  -1  145.59   11.30
  -8 -12   1  159.28   10.70
   8 -12  -1  155.58   12.20
   8 -12  -1  152.28   11.90
   8  12  -1  166.78   11.10
   8  12  -1  165.88   12.60
  -8  12   1  160.88   10.40
   8  12  -1  179.98   12.20
  -8  12   1  158.58    9.60
  -8  12   1  149.99   11.20
  -8  12   1  165.08   11.90
   7 -12  -1   22.00    4.00
   7 -12  -1   29.90    4.40
   7 -12  -1   25.40    5.40
  -7 -12   1   33.70    3.60
  -7 -12   1   31.30    4.10
   7 -12  -1   33.70    4.50
  -7  12   1   27.80    3.90
  -7  12   1   30.90    3.30
   7  12  -1   29.90    5.10
  -7  12   1   28.00    2.80
   7  12  -1   35.40    4.90
   7  12  -1   30.60    4.00
  -7  12   1   31.30    4.40
  -6 -12   1 1419.46   80.99
  -6 -12   1 1429.46   79.69
   6 -12  -1 1437.76   81.69
  -6 -12   1 1373.76   79.79
   6 -12  -1 1316.77   81.89
  -6 -12   1 1352.66   81.09
   6 -12  -1 1566.64   81.89
  -6  12   1 1414.06   80.49
  -6  12   1 1410.86   80.39
  -6  12   1 1460.75   82.39
  -6  12   1 1386.76   81.09
   6  12  -1 1467.15   81.09
  -6  12   1 1347.17   81.19
   6  12  -1 1458.55   81.59
   6  12  -1 1422.56   82.39
  -5 -12   1   24.60    3.50
   5 -12  -1   18.60    3.40
   5 -12  -1   22.10    3.30
   5 -12  -1   23.60    3.80
   5 -12  -1   28.50    4.50
   5 -12  -1   23.40    3.70
  -5 -12   1   24.00    2.20
  -5 -12   1   23.20    3.70
   5 -12  -1   14.30    3.30
  -5 -12   1   21.80    2.30
  -5 -12   1   22.10    3.60
  -5 -12   1   23.70    3.90
  -5  12   1   24.70    3.50
   5  12  -1   20.50    3.60
  -5  12   1   25.10    3.50
   5  12  -1   17.20    3.60
   5  12  -1   24.00    3.60
  -5  12   1   23.60    3.60
  -5  12   1   28.00    3.30
  -5  12   1   28.30    3.90
  -5  12   1   24.20    3.00
   5  12  -1   24.80    4.40
  -4 -12   1   44.70    3.20
   4 -12  -1   42.80    4.40
  -4 -12   1   37.90    3.40
   4 -12  -1   45.30    4.50
   4 -12  -1   46.60    4.50
  -4 -12   1   39.40    4.20
  -4 -12   1   44.40    4.70
   4 -12  -1   34.90    3.90
   4 -12  -1   40.10    4.60
   4 -12  -1   31.60    4.90
  -4 -12   1   42.20    4.60
  -4 -12   1   37.00    4.60
   4  12  -1   39.90    4.40
  -4  12   1   44.00    4.10
  -4  12   1   40.90    4.40
   4  12  -1   49.99    6.50
   4  12  -1   36.20    4.90
  -4  12   1   43.30    4.60
   4  12  -1   42.20    4.90
  -4  12   1   39.20    3.90
   4  12  -1   37.10    4.50
  -4  12   1   40.30    4.30
   4  12  -1   38.80    3.90
  -4  12   1   41.30    4.50
  -3 -12   1  949.90   49.10
   3 -12  -1  665.83   46.90
   3 -12  -1  784.22   46.50
  -3 -12   1  846.32   47.00
  -3 -12   1  802.82   46.70
  -3 -12   1  792.42   45.80
  -3 -12   1  814.62   46.90
   3 -12  -1  774.02   46.90
   3 -12  -1  760.72   47.10
   3 -12  -1  829.92   47.20
   3 -12  -1  865.41   46.70
   3  12  -1  815.82   46.30
   3  12  -1  755.92   46.40
  -3  12   1  817.02   46.90
  -3  12   1  838.82   46.90
   3  12  -1  771.62   46.70
   3  12  -1  839.22   47.70
  -3  12   1  787.62   47.30
   3  12  -1  695.73   46.70
  -3  12   1  811.72   46.30
   3  12  -1  839.42   47.80
   2 -12  -1  167.58   11.90
   2 -12  -1  182.58   11.20
  -2 -12   1  177.28   11.80
   2 -12  -1  145.99   11.60
   2 -12  -1  185.48   11.40
  -2 -12   1  164.08   11.60
  -2 -12   1  173.38   10.80
   2 -12  -1  179.18   11.60
  -2 -12   1  170.88   11.40
  -2 -12   1  188.78   11.70
   2 -12  -1  165.28   11.20
   2  12  -1  192.28   12.40
  -2  12   1  168.28   11.60
  -2  12   1  176.98   11.40
  -2  12   1  137.89   11.10
   2  12  -1  165.18   11.20
   2  12  -1  137.49   11.30
   2  12  -1  172.98   11.20
  -2  12   1  178.08   11.70
  -2  12   1  177.18   11.20
   2  12  -1  158.98   11.40
   2  12  -1  167.58   11.50
  -1 -12   1  129.09    9.40
  -1 -12   1  144.99    9.10
  -1 -12   1  133.89    9.50
  -1 -12   1  130.39    9.70
   1 -12  -1  137.79    9.50
   1 -12  -1  138.79   10.00
   1 -12  -1  141.29    9.40
   1 -12  -1  142.59    9.90
   1 -12  -1  145.99    9.20
   1 -12  -1  134.99    8.90
  -1 -12   1  111.99    9.30
  -1  12   1  142.99    9.70
   1  12  -1  153.98    9.80
  -1  12   1  112.99    9.10
  -1  12   1  141.09    9.30
   1  12  -1  142.39   10.00
  -1  12   1  138.59    9.90
   1  12  -1  127.39    9.30
   1  12  -1  132.79    9.20
   1  12  -1  107.19    9.30
   1  12  -1  145.89    9.50
  -1  12   1  107.79    9.30
  -1  12   1  142.19    9.30
   0 -12  -1    6.80    1.70
   0 -12  -1    7.20    1.60
   0 -12   1    5.20    1.90
   0 -12   1    6.80    1.90
   0 -12   1    4.10    1.90
   0 -12   1    3.80    1.80
   0 -12  -1    7.50    1.90
   0 -12  -1    4.20    1.70
   0 -12  -1    5.50    2.30
   0 -12  -1    6.20    2.10
   0 -12   1    8.10    2.00
   0  12   1    5.10    1.60
   0  12  -1    5.20    1.50
   0  12   1    8.70    2.30
   0  12  -1    5.40    2.00
   0  12   1    3.60    2.40
   0  12  -1    3.30    2.00
   0  12  -1    3.20    1.80
   0  12  -1    5.60    2.10
   0  12   1    7.40    2.30
   0  12  -1    5.90    1.80
   0  12   1    5.80    1.80
   0  12   1    2.50    1.70
   1 -12   1 1448.46   81.19
   1 -12   1 1203.58   81.19
  -1 -12  -1 1453.15   80.09
   1 -12   1 1464.55   80.89
  -1 -12  -1 1441.66   81.29
   1 -12   1 1455.25   81.09
   1 -12   1 1522.35   81.19
  -1 -12  -1 1463.65   80.59
  -1 -12  -1 1407.86   81.09
  -1 -12  -1 1414.66   80.99
   1 -12   1 1425.66   81.39
   1  12   1 1433.96   81.19
  -1  12  -1 1446.86   80.89
   1  12   1 1305.27   81.09
   1  12   1 1413.76   80.89
   1  12   1 1434.66   80.69
  -1  12  -1 1468.45   81.19
  -1  12  -1 1460.35   81.29
  -1  12  -1 1333.27   81.09
  -1  12  -1 1400.96   81.19
  -1  12  -1 1341.07   80.89
   1  12   1 1489.85   81.99
   2 -12   1  416.66   26.60
   2 -12   1  440.06   26.50
  -2 -12  -1  441.26   25.30
   2 -12   1  459.55   26.80
  -2 -12  -1  484.15   26.90
  -2 -12  -1  442.56   26.40
  -2 -12  -1  445.86   25.90
   2 -12   1  368.16   26.80
   2 -12   1  450.15   26.80
   2 -12   1  442.86   26.70
   2 -12   1  441.06   26.50
  -2 -12  -1  422.86   26.70
  -2  12  -1  457.95   26.50
  -2  12  -1  419.96   26.30
   2  12   1  425.66   26.70
   2  12   1  438.76   26.70
   2  12   1  462.45   27.80
   2  12   1  460.65   26.50
  -2  12  -1  429.56   26.50
  -2  12  -1  440.76   26.70
   2  12   1  459.45   26.10
  -2  12  -1  468.15   26.90
  -3 -12  -1   35.20    3.70
   3 -12   1   30.20    3.90
   3 -12   1   28.40    4.40
   3 -12   1   35.80    4.30
  -3 -12  -1   40.20    3.40
  -3 -12  -1   28.90    4.50
   3 -12   1   38.50    4.40
   3 -12   1   28.70    4.20
  -3 -12  -1   40.30    4.10
   3 -12   1   35.50    3.90
   3 -12   1   39.30    4.30
  -3  12  -1   37.30    3.70
  -3  12  -1   36.20    4.10
   3  12   1   48.80    6.60
  -3  12  -1   36.30    3.80
  -3  12  -1   39.90    4.40
   3  12   1   34.90    4.00
   3  12   1   37.50    3.50
   3  12   1   35.30    4.70
  -3  12  -1   37.80    4.10
   3  12   1   38.10    3.90
  -4 -12  -1  565.94   32.20
  -4 -12  -1  579.34   33.10
   4 -12   1  588.44   33.70
   4 -12   1  548.35   33.30
   4 -12   1  512.75   33.60
  -4 -12  -1  564.34   32.80
  -4 -12  -1  544.05   33.70
   4 -12   1  587.24   33.40
   4 -12   1  556.84   33.20
   4 -12   1  533.05   33.00
  -4  12  -1  539.85   32.80
  -4  12  -1  538.15   33.50
   4  12   1  559.84   33.90
  -4  12  -1  546.35   32.90
  -4  12  -1  603.44   32.80
   4  12   1  556.84   33.30
  -4  12  -1  533.45   33.10
   4  12   1  588.54   34.80
   4  12   1  548.85   32.30
   5 -12   1   64.19    5.60
   5 -12   1   61.19    5.50
  -5 -12  -1   67.99    5.40
  -5 -12  -1   55.89    4.40
   5 -12   1   64.09    5.50
   5 -12   1   55.29    5.40
   5 -12   1   52.49    5.90
  -5 -12  -1   55.69    5.80
  -5 -12  -1   64.19    5.10
   5 -12   1   54.79    5.60
   5 -12   1   59.19    6.10
  -5  12  -1   58.29    4.40
   5  12   1   65.09    5.90
  -5  12  -1   54.99    5.30
   5  12   1   67.19    7.50
  -5  12  -1   62.19    5.80
   5  12   1   56.39    6.20
  -5  12  -1   59.89    5.80
   5  12   1   64.09    4.60
   5  12   1   58.79    5.30
  -5  12  -1   51.99    4.90
   5  12   1   52.49    5.50
  -5  12  -1   60.79    5.30
   6 -12   1  229.98   15.50
   6 -12   1  188.38   14.50
  -6 -12  -1  212.98   13.90
   6 -12   1  221.68   14.70
  -6 -12  -1  226.68   14.10
   6 -12   1  262.97   15.80
  -6  12  -1  239.98   15.30
   6  12   1  233.68   14.50
   6  12   1  236.28   15.00
  -6  12  -1  223.38   14.40
   6  12   1  193.18   15.10
  -6  12  -1  217.68   14.10
  -6  12  -1  204.48   14.30
   6  12   1  225.78   14.70
   7 -12   1  386.46   24.10
  -7 -12  -1  356.56   21.90
   7 -12   1  324.07   22.90
   7 -12   1  365.56   23.10
  -7 -12  -1  378.36   22.10
   7 -12   1  437.56   24.30
  -7  12  -1  388.36   23.00
   7  12   1  369.16   22.70
  -7  12  -1  366.76   22.70
   7  12   1  332.37   23.70
  -7  12  -1  418.16   23.90
   7  12   1  362.36   23.10
  -7  12  -1  333.77   22.20
  -8 -12  -1    0.30    0.90
   8 -12   1   -0.10    1.40
   8 -12   1    2.00    2.20
  -8 -12  -1    1.10    1.10
   8 -12   1   -1.00    1.80
   8 -12   1   -1.20    1.80
  -8  12  -1    0.50    1.40
   8  12   1    0.80    1.60
  -8  12  -1    0.80    1.10
  -8  12  -1    0.60    1.90
   8  12   1   -1.30    1.90
   8  12   1   -2.00    2.40
   9 -12   1  107.69    9.40
   9 -12   1  121.79    9.60
   9 -12   1  104.89    8.60
   9  12   1   97.99    9.60
  -9  12  -1   96.79    7.60
   9  12   1  100.59    8.50
  -9  12  -1   95.09    8.60
  -9  12  -1   94.79    7.20
   9  12   1   95.29    7.70
  10 -12   1   67.89    7.40
  10 -12   1   61.79    6.60
  10 -12   1   75.59    7.90
  10  12   1   62.59    6.00
  10  12   1   65.49    8.70
 -10  12  -1   72.59    5.70
  10  12   1   57.09    7.20
 -10  12  -1   65.99    5.10
  11 -12   1   55.39    7.80
  11 -12   1   67.99    6.60
  11 -12   1   70.69    7.90
  11  12   1   49.20    5.90
  11  12   1   60.49    6.70
  11  12   1   48.10    7.80
  12 -12   1  263.57   18.90
  12 -12   1  304.47   20.40
  12 -12   1  307.57   20.50
  12  12   1  277.07   21.00
  12  12   1  304.87   19.50
  12  12   1  250.67   18.00
  13 -12   1   22.30    5.00
  13 -12   1   28.20    6.10
  13 -12   1   21.00    4.10
  13  12   1   21.30    4.80
  13  12   1   11.10    4.90
  14 -12   1   52.09    8.00
  14 -12   1   59.19    6.60
  14 -12   1   49.10    7.60
  14  12   1   48.00    6.60
  14  12   1   49.10    8.60
  15 -12   1    0.90    2.80
  15 -12   1   10.90    5.10
  15 -12   1    5.70    3.40
  15  12   1    1.10    3.30
  15  12   1    0.90    4.40
  16 -12   1   18.60    5.10
  16 -12   1   10.90    4.60
  16 -12   1   21.10    4.70
  16  12   1    9.00    5.80
  17 -12   1    3.50    4.00
  17 -12   1    4.00    3.70
  17 -12   1   -3.90    2.40
  17  12   1   -2.80    4.80
  17  12   1   -6.10    3.20
  17 -13  -1   95.89   11.00
  17 -13  -1  109.39   10.00
  17 -13  -1  112.39   11.60
  17  13  -1  100.69   13.60
  17  13  -1   80.09   10.80
  16 -13  -1  137.19   12.40
  16 -13  -1  114.29   12.10
  16 -13  -1  111.79   10.40
  16  13  -1  108.19   13.10
  16  13  -1  119.79   11.60
  15 -13  -1   26.00    6.20
  15 -13  -1   28.40    5.80
  15 -13  -1   38.40    6.60
  15  13  -1   35.40    6.30
  15  13  -1   36.90    7.90
  14 -13  -1   14.60    3.70
  14 -13  -1   14.00    4.00
  14 -13  -1   11.00    4.20
  14  13  -1   14.70    5.70
  14  13  -1   13.20    4.50
  13 -13  -1   41.40    6.30
  13 -13  -1   48.00    7.60
  13 -13  -1   44.50    7.20
  13  13  -1   37.80    7.60
  13  13  -1   40.40    6.40
  12 -13  -1  315.57   21.20
  12 -13  -1  324.47   22.00
  12 -13  -1  325.37   22.40
 -12  13   1  315.77   23.50
  12  13  -1  297.57   21.30
  12  13  -1  306.67   22.70
 -11 -13   1  492.85   30.00
  11 -13  -1  500.65   31.80
  11 -13  -1  534.75   33.20
  11 -13  -1  518.35   32.60
 -11 -13   1  508.85   29.80
 -11  13   1  488.35   31.00
  11  13  -1  511.15   32.20
  11  13  -1  536.65   33.50
 -10 -13   1  186.28   12.00
  10 -13  -1  191.58   14.90
 -10 -13   1  184.98   12.30
  10 -13  -1  205.18   14.60
 -10 -13   1  188.18   12.50
  10 -13  -1  192.58   13.90
  10  13  -1  200.28   15.30
  10  13  -1  178.88   13.90
 -10  13   1  187.28   13.20
 -10  13   1  195.68   12.30
   9 -13  -1   28.00    4.50
  -9 -13   1   30.40    3.70
  -9 -13   1   22.50    3.50
   9 -13  -1   29.30    5.00
  -9 -13   1   24.40    2.60
   9 -13  -1   29.20    5.40
  -9  13   1   28.90    4.30
   9  13  -1   25.70    4.80
  -9  13   1   32.00    5.00
  -9  13   1   28.80    3.20
   9  13  -1   23.50    5.10
  -8 -13   1   30.20    3.00
   8 -13  -1   53.49    5.80
   8 -13  -1   35.70    5.70
  -8 -13   1   35.70    3.80
  -8 -13   1   38.20    4.40
   8 -13  -1   25.50    4.30
   8  13  -1   42.50    5.50
  -8  13   1   37.80    5.30
  -8  13   1   37.00    3.70
  -8  13   1   36.30    5.00
  -8  13   1   36.80    4.70
   8  13  -1   39.20    5.50
   7 -13  -1   19.70    4.20
  -7 -13   1   31.70    4.30
   7 -13  -1   30.10    4.80
   7 -13  -1   20.20    3.90
  -7 -13   1   29.50    2.60
   7 -13  -1   37.70    5.10
  -7 -13   1   30.70    3.70
  -7  13   1   32.10    4.40
   7  13  -1   28.00    4.00
   7  13  -1   29.00    5.20
   7  13  -1   26.80    4.70
  -7  13   1   32.80    4.70
  -7  13   1   29.70    4.10
  -7  13   1   30.70    3.40
  -7  13   1   33.40    3.00
   6 -13  -1  232.08   15.40
   6 -13  -1  200.98   15.00
  -6 -13   1  232.38   15.00
  -6 -13   1  222.88   13.60
  -6 -13   1  228.98   14.80
  -6 -13   1  222.48   13.50
   6 -13  -1  198.88   15.70
   6  13  -1  240.78   16.00
  -6  13   1  239.48   15.30
  -6  13   1  241.28   14.40
   6  13  -1  215.08   14.80
  -6  13   1  229.98   15.10
  -6  13   1  233.08   14.40
  -6  13   1  231.78   14.90
   6  13  -1  240.28   15.70
  -5 -13   1  194.48   11.60
   5 -13  -1  158.48   13.30
   5 -13  -1  193.58   13.00
  -5 -13   1  189.38   11.30
  -5 -13   1  170.68   12.70
  -5 -13   1  197.48   12.80
   5 -13  -1  195.08   14.00
  -5 -13   1  168.98   12.90
  -5  13   1  184.98   12.50
  -5  13   1  208.08   12.70
   5  13  -1  205.08   14.70
   5  13  -1  195.18   12.80
  -5  13   1  190.48   13.00
  -5  13   1  181.38   12.20
   5  13  -1  200.48   12.20
   5  13  -1  192.08   13.30
  -5  13   1  178.08   12.70
  -4 -13   1  866.01   48.10
   4 -13  -1  738.53   47.60
  -4 -13   1  806.72   47.70
   4 -13  -1  836.42   48.40
  -4 -13   1  855.11   46.80
  -4 -13   1  897.11   48.40
   4 -13  -1  826.92   48.00
   4 -13  -1  671.93   48.10
   4 -13  -1  799.62   47.80
  -4 -13   1  839.42   46.40
   4  13  -1  758.82   48.00
   4  13  -1  872.51   49.30
  -4  13   1  761.02   47.90
  -4  13   1  751.02   47.80
   4  13  -1  862.11   47.30
  -4  13   1  835.02   47.50
   4  13  -1  810.62   47.70
  -4  13   1  808.02   47.30
  -4  13   1  804.72   47.80
  -4  13   1  890.51   48.20
  -4  13   1  848.82   48.10
   4  13  -1  849.32   48.10
   4  13  -1  814.12   48.10
   3 -13  -1  736.03   41.90
  -3 -13   1  777.42   42.50
  -3 -13   1  727.73   42.00
   3 -13  -1  715.03   42.10
  -3 -13   1  711.43   41.10
  -3 -13   1  699.53   42.30
   3 -13  -1  766.62   42.00
  -3 -13   1  752.82   42.40
   3 -13  -1  627.14   42.30
   3 -13  -1  745.03   42.00
   3 -13  -1  730.03   42.60
  -3  13   1  768.02   42.30
   3  13  -1  704.33   42.10
   3  13  -1  758.72   43.20
   3  13  -1  731.93   42.20
  -3  13   1  704.33   41.60
  -3  13   1  637.54   41.90
   3  13  -1  679.63   41.80
  -3  13   1  705.83   42.20
  -3  13   1  693.03   42.00
   3  13  -1  636.14   42.00
   3  13  -1  709.93   41.60
   2 -13  -1   50.49    4.70
  -2 -13   1   44.60    5.00
  -2 -13   1   52.39    5.00
   2 -13  -1   44.00    5.20
  -2 -13   1   46.60    4.20
   2 -13  -1   51.19    4.60
   2 -13  -1   48.00    4.50
  -2 -13   1   46.30    4.70
  -2 -13   1   49.70    5.20
   2 -13  -1   48.00    5.30
   2  13  -1   51.19    5.70
  -2  13   1   49.00    5.10
  -2  13   1   47.90    5.40
   2  13  -1   53.69    4.70
   2  13  -1   51.89    4.70
  -2  13   1   37.10    4.60
  -2  13   1   36.50    4.20
   2  13  -1   40.60    5.00
   2  13  -1   53.09    5.00
   2  13  -1   50.39    5.00
   1 -13  -1  185.48   11.30
  -1 -13   1  181.98   11.90
   1 -13  -1  177.58   11.50
   1 -13  -1  166.98   11.70
   1 -13  -1  175.48   12.20
   1 -13  -1  157.08   12.20
  -1 -13   1  182.88   11.40
   1 -13  -1  175.48   12.30
  -1 -13   1  155.98   11.80
  -1 -13   1  182.48   12.50
  -1 -13   1  175.88   12.20
   1  13  -1  169.78   11.70
   1  13  -1  180.18   12.30
   1  13  -1  191.18   12.50
  -1  13   1  148.79   11.70
  -1  13   1  185.28   11.70
  -1  13   1  174.98   12.00
   1  13  -1  166.48   11.70
  -1  13   1  145.29   11.40
  -1  13   1  183.18   12.30
   0 -13   1  159.18   10.80
   0 -13  -1  168.68   11.20
   0 -13  -1  153.38   10.70
   0 -13   1  153.28   10.40
   0 -13   1  166.88   10.60
   0 -13   1  143.89   11.00
   0 -13  -1  148.09   10.20
   0 -13  -1  160.58   10.00
   0 -13  -1  157.88   11.50
   0  13  -1  146.19   10.90
   0  13  -1  174.48   11.20
   0  13   1  152.28   10.40
   0  13  -1  158.68   11.50
   0  13  -1  147.39   10.60
   0  13   1  163.98   11.40
   0  13   1  135.49   10.50
   0  13  -1  147.29   10.60
   0  13   1  142.89   10.80
  -1 -13  -1    2.00    1.40
  -1 -13  -1    2.60    1.70
  -1 -13  -1    3.30    1.90
  -1 -13  -1    3.80    1.70
   1 -13   1    5.10    2.00
   1 -13   1    2.90    1.40
  -1 -13  -1    4.10    1.30
   1 -13   1    1.80    1.80
   1 -13   1    2.00    1.80
   1 -13   1    4.20    1.90
   1 -13   1    5.10    2.00
  -1  13  -1    3.40    1.90
   1  13   1    2.80    1.90
  -1  13  -1    7.00    2.30
  -1  13  -1    2.10    1.70
   1  13   1    3.50    1.60
  -1  13  -1    2.30    1.80
   1  13   1    2.50    2.00
  -1  13  -1    5.00    2.20
  -1  13  -1    3.30    1.70
   1  13   1    5.30    1.90
   1  13   1    3.00    1.60
   1  13   1    2.70    2.50
  -2 -13  -1  259.67   16.70
   2 -13   1  281.77   17.00
  -2 -13  -1  272.17   16.90
  -2 -13  -1  257.57   15.90
   2 -13   1  260.57   16.50
  -2 -13  -1  257.17   15.20
   2 -13   1  265.47   16.70
  -2 -13  -1  262.87   16.40
   2 -13   1  264.47   16.70
   2 -13   1  206.08   16.70
   2 -13   1  263.07   16.50
   2 -13   1  235.48   16.60
   2  13   1  266.37   16.50
  -2  13  -1  259.67   16.80
   2  13   1  242.18   16.70
  -2  13  -1  292.47   16.70
   2  13   1  276.67   17.90
  -2  13  -1  252.17   16.50
   2  13   1  287.27   16.30
  -2  13  -1  256.97   16.30
   2  13   1  262.17   16.70
   2  13   1  220.58   16.40
  -2  13  -1  257.97   16.70
   3 -13   1  225.38   15.50
   3 -13   1  256.07   15.70
   3 -13   1  205.08   15.80
   3 -13   1  241.78   15.50
  -3 -13  -1  230.98   14.70
  -3 -13  -1  237.28   15.30
  -3 -13  -1  238.28   15.80
  -3 -13  -1  243.88   15.60
   3 -13   1  252.67   15.80
   3 -13   1  261.77   16.00
   3 -13   1  242.68   15.40
  -3  13  -1  228.38   15.50
   3  13   1  248.98   15.60
   3  13   1  222.38   15.60
   3  13   1  204.38   15.50
  -3  13  -1  227.68   15.10
   3  13   1  259.87   17.00
  -3  13  -1  237.88   15.60
  -3  13  -1  250.17   15.40
   3  13   1  251.07   15.40
   3  13   1  257.37   15.00
  -3  13  -1  230.78   15.80
  -4 -13  -1  296.97   19.80
   4 -13   1  331.37   20.40
   4 -13   1  323.07   20.20
  -4 -13  -1  309.07   19.60
  -4 -13  -1  343.67   19.20
   4 -13   1  319.87   20.20
   4 -13   1  325.97   20.30
   4 -13   1  283.37   20.50
  -4 -13  -1  309.47   20.50
   4 -13   1  338.57   20.70
   4 -13   1  296.77   19.90
   4  13   1  329.57   20.20
  -4  13  -1  318.47   20.10
   4  13   1  331.87   20.00
  -4  13  -1  295.07   19.60
  -4  13  -1  331.07   19.90
   4  13   1  274.17   20.20
   4  13   1  315.47   20.30
  -4  13  -1  333.97   20.40
   4  13   1  357.86   22.10
   4  13   1  355.46   19.40
   5 -13   1  497.35   31.80
  -5 -13  -1  535.15   31.30
   5 -13   1  489.65   32.40
  -5 -13  -1  565.44   31.60
   5 -13   1  563.34   32.60
  -5 -13  -1  529.75   30.60
   5 -13   1  455.85   31.60
  -5  13  -1  555.94   31.60
   5  13   1  542.95   32.00
  -5  13  -1  562.14   32.30
   5  13   1  542.75   33.70
   5  13   1  532.45   31.60
  -5  13  -1  527.85   31.80
   5  13   1  534.45   30.70
   5  13   1  509.95   31.70
  -5  13  -1  496.45   31.20
  -5  13  -1  539.55   30.70
   6 -13   1  108.89    8.80
  -6 -13  -1   96.49    7.20
  -6 -13  -1  103.79    7.50
   6 -13   1   86.69    7.90
   6 -13   1   96.09    7.90
   6  13   1  100.09    6.60
   6  13   1  112.49   10.30
  -6  13  -1  102.09    8.40
   6  13   1   96.29    7.60
   6  13   1  108.59    8.40
  -6  13  -1   95.69    7.80
  -6  13  -1  101.49    7.80
  -6  13  -1   94.49    7.40
   6  13   1   84.69    8.50
   7 -13   1  805.52   54.09
   7 -13   1 1000.70   55.49
  -7 -13  -1  927.01   55.29
  -7 -13  -1  954.90   53.29
   7 -13   1 1039.70   55.49
   7 -13   1  933.71   54.39
  -7  13  -1  898.61   53.89
  -7  13  -1  972.40   54.89
  -7  13  -1  944.01   54.09
   7  13   1  904.61   54.29
   7  13   1  850.61   54.89
  -7  13  -1  900.21   53.59
   8 -13   1  120.39    9.70
   8 -13   1   90.79    8.50
  -8 -13  -1  104.59    7.20
  -8 -13  -1   98.29    7.00
   8 -13   1   98.19    9.30
  -8  13  -1  104.09    8.10
  -8  13  -1   99.89    8.90
  -8  13  -1  115.49    7.90
   8  13   1  111.89   10.00
   8  13   1  104.49    8.80
   9 -13   1  248.68   16.90
   9 -13   1  272.07   17.80
   9 -13   1  280.27   18.10
  -9  13  -1  252.57   15.90
   9  13   1  225.98   17.50
  -9  13  -1  225.28   15.50
   9  13   1  249.38   18.00
  -9  13  -1  226.28   16.90
  10 -13   1  201.08   14.70
  10 -13   1  172.58   13.40
  10 -13   1  199.48   14.60
  10  13   1  176.78   14.80
  10  13   1  186.38   13.70
 -10  13  -1  185.58   12.10
 -10  13  -1  181.48   12.40
  11 -13   1   18.30    4.40
  11 -13   1   14.40    4.30
  11 -13   1   23.90    4.50
  11  13   1   22.50    4.60
  11  13   1    9.60    4.60
  12 -13   1  218.78   15.20
  12 -13   1  191.48   15.90
  12 -13   1  197.08   15.90
  12  13   1  185.98   16.50
  12  13   1  219.78   15.30
  13 -13   1  118.89    9.60
  13 -13   1  108.49   10.60
  13 -13   1   95.09    9.90
  13  13   1  103.79   11.70
  13  13   1   87.99    9.30
  14 -13   1  140.79   13.40
  14 -13   1  156.38   12.70
  14 -13   1  157.28   13.70
  14  13   1  162.98   12.90
  14  13   1  147.89   14.60
  15 -13   1    2.60    3.20
  15 -13   1    4.60    3.80
  15 -13   1    6.50    2.70
  15  13   1    5.10    3.50
  15  13   1    5.60    5.20
  16 -13   1  215.98   16.10
  16 -13   1  213.48   17.40
  16 -13   1  224.88   17.50
  16  13   1  216.28   19.10
  16  13   1  206.38   16.40
  17 -14  -1  132.49   13.80
  17 -14  -1  139.29   12.40
  17 -14  -1  141.79   13.40
  17  14  -1  151.58   13.30
  17  14  -1  124.89   14.70
  16 -14  -1   36.30    7.40
  16 -14  -1   29.00    6.20
  16 -14  -1   26.40    5.80
  16  14  -1   33.40    8.30
  16  14  -1   36.40    6.80
  15 -14  -1   72.79    9.10
  15 -14  -1   84.39    8.60
  15 -14  -1   81.09   10.90
  15  14  -1   87.99   12.70
  15  14  -1   87.29   11.60
  14 -14  -1   84.79    9.90
  14 -14  -1   95.29   10.30
  14  14  -1   92.49    9.70
  14  14  -1  104.99   11.80
  13 -14  -1   76.99    8.40
  13 -14  -1   96.69    9.70
  13 -14  -1   76.89    9.20
  13  14  -1   84.89    9.00
  13  14  -1  103.79   11.10
  12 -14  -1   13.40    4.00
  12 -14  -1   12.60    4.50
  12 -14  -1   16.30    4.30
  12  14  -1   12.80    5.10
  12  14  -1   13.20    4.20
 -12  14   1   10.30    3.50
  11 -14  -1   19.10    4.20
  11 -14  -1   20.70    4.20
  11 -14  -1   16.80    4.70
  11  14  -1   12.70    4.60
  11  14  -1   13.10    4.30
 -11  14   1   14.20    3.40
  10 -14  -1   67.09    7.00
 -10 -14   1   60.69    4.70
 -10 -14   1   61.39    5.40
 -10 -14   1   65.59    5.40
  10 -14  -1   65.19    7.20
  10 -14  -1   62.09    8.40
 -10  14   1   57.69    5.40
  10  14  -1   65.09    9.00
  10  14  -1   64.49    7.10
  -9 -14   1  206.18   14.10
  -9 -14   1  216.68   13.10
   9 -14  -1  216.48   16.30
   9 -14  -1  202.48   15.30
  -9 -14   1  209.08   14.00
   9 -14  -1  189.98   15.00
   9  14  -1  242.08   16.60
   9  14  -1  232.28   15.70
  -9  14   1  211.48   13.90
  -9  14   1  237.08   15.40
  -8 -14   1  418.96   25.80
   8 -14  -1  380.66   26.50
  -8 -14   1  412.86   26.00
   8 -14  -1  420.86   27.10
   8 -14  -1  421.76   27.70
   8  14  -1  492.45   28.10
  -8  14   1  426.46   26.30
  -8  14   1  416.16   25.60
  -8  14   1  424.26   26.60
   8  14  -1  450.95   27.10
  -7 -14   1   -0.30    1.50
   7 -14  -1    0.30    1.90
  -7 -14   1    1.70    1.90
   7 -14  -1   -1.40    2.20
   7 -14  -1   -2.20    1.70
  -7 -14   1   -0.70    0.60
  -7  14   1    0.10    1.50
  -7  14   1    1.20    1.80
  -7  14   1   -0.40    1.90
   7  14  -1   -1.40    2.20
  -7  14   1   -0.90    1.20
   7  14  -1    0.10    2.70
  -6 -14   1   76.49    6.60
   6 -14  -1   81.19    7.30
   6 -14  -1   74.09    7.10
  -6 -14   1   83.39    5.70
  -6 -14   1   79.09    5.40
   6 -14  -1   77.09    7.20
  -6 -14   1   80.59    7.00
   6 -14  -1   75.59    7.90
  -6  14   1   95.19    7.30
   6  14  -1   83.99    9.20
  -6  14   1   83.49    7.20
  -6  14   1   81.39    7.50
  -6  14   1   88.29    6.50
  -6  14   1   76.69    6.80
   6  14  -1   94.69    8.30
  -5 -14   1  637.84   34.10
  -5 -14   1  564.74   35.30
   5 -14  -1  492.45   35.80
  -5 -14   1  610.04   35.20
  -5 -14   1  584.24   33.60
   5 -14  -1  547.15   35.30
   5 -14  -1  587.34   35.40
   5 -14  -1  599.14   35.90
   5  14  -1  658.23   34.80
   5  14  -1  575.44   38.40
   5  14  -1  543.85   35.50
  -5  14   1  576.54   35.00
  -5  14   1  575.04   34.70
  -5  14   1  618.74   35.70
  -5  14   1  656.33   35.30
  -5  14   1  558.74   35.20
   5  14  -1  611.34   35.90
  -4 -14   1  114.69    7.90
  -4 -14   1  121.19    8.90
   4 -14  -1  130.29    9.90
  -4 -14   1  117.79    7.50
  -4 -14   1  113.59    9.10
  -4 -14   1  117.29    9.30
   4 -14  -1  120.19    9.40
   4 -14  -1  108.39    8.80
   4  14  -1  119.19   10.20
   4  14  -1  122.19    9.50
   4  14  -1  126.69    8.60
  -4  14   1  111.79    8.40
   4  14  -1  114.79    8.80
  -4  14   1  113.29    8.90
  -4  14   1  121.49    8.50
  -4  14   1  126.09    9.20
  -4  14   1  127.29    9.40
  -4  14   1   94.69    9.50
   4  14  -1  102.19   10.00
  -3 -14   1  217.08   13.90
   3 -14  -1  196.38   13.00
   3 -14  -1  178.58   13.80
  -3 -14   1  199.98   13.60
  -3 -14   1  195.68   12.40
   3 -14  -1  177.38   13.10
  -3 -14   1  193.08   13.20
   3 -14  -1  214.38   13.30
   3  14  -1  196.58   13.40
  -3  14   1  186.98   13.30
  -3  14   1  194.88   12.80
   3  14  -1  186.68   13.00
  -3  14   1  188.78   13.30
  -3  14   1  186.18   13.10
   3  14  -1  175.28   13.20
  -3  14   1  201.88   13.50
   3  14  -1  211.28   13.00
   3  14  -1  210.68   14.40
   2 -14  -1  100.29    7.10
  -2 -14   1   89.29    7.80
  -2 -14   1   92.49    7.50
   2 -14  -1   87.89    7.10
   2 -14  -1   99.79    7.30
   2 -14  -1   88.79    7.30
   2 -14  -1  105.49    8.10
  -2 -14   1   95.49    6.80
  -2 -14   1   92.59    7.80
   2 -14  -1   90.99    8.00
   2  14  -1   88.29    7.20
  -2  14   1   94.39    7.10
   2  14  -1   89.99    7.50
  -2  14   1   73.29    7.10
   2  14  -1   92.09    7.60
  -2  14   1   93.29    7.70
   2  14  -1   71.59    7.40
   2  14  -1   91.69    8.20
   2  14  -1   90.09    7.10
  -2  14   1   92.99    7.60
  -2  14   1   88.99    7.30
  -1 -14   1  602.64   38.50
   1 -14  -1  676.53   38.50
   1 -14  -1  675.03   37.70
   1 -14  -1  641.94   38.00
   1 -14  -1  636.74   38.20
   1 -14  -1  646.64   39.10
  -1 -14   1  677.73   38.90
   1 -14  -1  684.83   39.00
  -1 -14   1  630.64   38.40
  -1 -14   1  649.83   38.40
  -1 -14   1  646.84   37.80
   1  14  -1  682.43   38.40
   1  14  -1  652.53   38.50
  -1  14   1  708.73   38.80
  -1  14   1  545.95   38.20
   1  14  -1  645.14   38.30
   1  14  -1  653.83   38.90
  -1  14   1  645.84   38.00
  -1  14   1  559.54   38.00
  -1  14   1  632.34   38.80
  -1  14   1  667.33   38.90
   1  14  -1  662.63   38.20
   0 -14   1   85.49    7.30
   0 -14   1  107.19    7.30
   0 -14  -1   94.29    7.00
   0 -14  -1   94.39    7.80
   0 -14  -1  102.89    7.50
   0 -14   1   91.79    7.30
   0 -14   1   99.49    7.10
   0 -14   1   68.49    7.30
   0 -14  -1   97.89    6.60
   0  14   1   90.59    8.00
   0  14   1   90.99    7.10
   0  14   1   96.79    7.20
   0  14  -1   95.99    7.50
   0  14  -1   90.39    7.50
   0  14  -1   80.39    7.40
   0  14   1   83.49    7.30
   0  14   1   97.29    7.60
   0  14  -1   83.79    7.20
   0  14  -1   86.69    7.60
   0  14  -1   88.99    7.10
   1 -14   1  836.02   47.80
  -1 -14  -1  801.72   47.30
  -1 -14  -1  853.81   46.10
  -1 -14  -1  841.42   46.70
   1 -14   1  692.13   47.20
   1 -14   1  817.62   47.20
   1 -14   1  694.33   47.50
   1 -14   1  826.82   47.40
   1 -14   1  876.81   47.10
   1 -14   1  857.81   47.30
  -1 -14  -1  828.22   47.20
  -1 -14  -1  890.51   47.80
  -1  14  -1  828.32   47.20
   1  14   1  884.41   47.10
  -1  14  -1  793.02   47.30
   1  14   1  696.23   46.90
   1  14   1  822.32   47.40
   1  14   1  836.12   48.30
  -1  14  -1  785.22   46.90
  -1  14  -1  781.22   47.50
   1  14   1  677.83   47.10
   1  14   1  790.52   47.00
  -1  14  -1  772.12   47.30
  -1  14  -1  864.41   47.50
   2 -14   1  142.69   10.50
  -2 -14  -1  140.39   10.50
  -2 -14  -1  151.58    9.70
   2 -14   1  166.38   10.50
   2 -14   1  126.39   10.70
  -2 -14  -1  148.49   10.20
  -2 -14  -1  154.18   10.70
   2 -14   1  136.89   10.10
   2 -14   1  136.19   10.20
   2 -14   1  125.09   10.40
  -2 -14  -1  151.18    9.00
   2 -14   1  141.79   10.40
   2  14   1  137.19    9.80
   2  14   1  164.48   11.80
   2  14   1  139.09   10.50
  -2  14  -1  153.98   10.50
  -2  14  -1  151.98   10.60
   2  14   1  128.69   10.30
   2  14   1  144.59   10.20
   2  14   1  129.99   10.30
  -2  14  -1  147.19   10.10
  -2  14  -1  153.18   10.40
  -2  14  -1  135.49   10.40
   3 -14   1  636.94   38.00
   3 -14   1  706.53   38.10
  -3 -14  -1  603.94   37.70
   3 -14   1  621.64   38.00
  -3 -14  -1  647.04   37.60
   3 -14   1  656.63   38.20
   3 -14   1  563.74   38.20
  -3 -14  -1  664.53   37.00
   3  14   1  562.74   37.80
   3  14   1  614.24   37.90
  -3  14  -1  664.83   37.50
  -3  14  -1  652.63   38.10
   3  14   1  605.94   37.50
   3  14   1  608.94   37.80
   3  14   1  679.33   39.40
   3  14   1  641.24   37.20
  -3  14  -1  644.74   37.60
  -3  14  -1  662.63   38.00
   4 -14   1   29.80    4.20
   4 -14   1   24.70    5.10
  -4 -14  -1   45.00    3.80
  -4 -14  -1   35.60    4.00
   4 -14   1   39.70    4.80
   4 -14   1   35.30    4.40
   4 -14   1   42.20    5.00
  -4 -14  -1   37.60    4.80
  -4  14  -1   38.80    4.10
  -4  14  -1   39.10    4.70
   4  14   1   38.50    7.30
   4  14   1   34.10    3.80
  -4  14  -1   45.70    4.40
   4  14   1   36.70    5.00
  -4  14  -1   41.30    5.10
   4  14   1   31.40    4.90
  -5 -14  -1    3.50    1.80
   5 -14   1    2.40    2.30
  -5 -14  -1    0.50    1.30
  -5 -14  -1    2.40    1.40
   5 -14   1    2.30    2.00
   5 -14   1    2.40    2.00
   5 -14   1    4.30    2.80
  -5  14  -1    3.90    2.10
  -5  14  -1    5.70    2.30
  -5  14  -1    4.80    1.90
   5  14   1    0.60    3.10
  -5  14  -1    4.20    1.80
  -5  14  -1    3.30    1.50
   5  14   1    2.40    1.60
   5  14   1    1.80    2.10
   5  14   1    6.30    3.10
   6 -14   1   82.79    8.40
  -6 -14  -1   86.99    6.90
  -6 -14  -1   94.09    7.40
   6 -14   1   92.59    8.40
   6 -14   1   91.49    7.70
  -6  14  -1   98.79    7.90
  -6  14  -1   94.39    7.70
  -6  14  -1  100.29    7.60
  -6  14  -1   91.39    8.00
   6  14   1   95.59    6.60
   6  14   1  111.09   10.30
   6  14   1   93.19    8.10
   6  14   1   87.89    8.60
   7 -14   1   47.70    5.80
  -7 -14  -1   51.79    4.50
  -7 -14  -1   55.09    5.00
   7 -14   1   55.19    6.50
   7 -14   1   53.59    5.60
   7 -14   1   57.99    6.50
  -7  14  -1   53.59    5.50
   7  14   1   72.89    9.80
  -7  14  -1   54.39    5.90
   7  14   1   45.30    6.60
   7  14   1   47.20    5.90
  -7  14  -1   51.09    5.30
  -8 -14  -1    1.10    1.40
   8 -14   1    4.60    3.10
  -8 -14  -1    1.60    1.20
   8 -14   1    0.70    2.30
   8 -14   1    0.20    2.20
   8  14   1    0.70    2.40
  -8  14  -1    1.40    1.50
   8  14   1    0.50    2.80
  -8  14  -1   -1.10    1.70
  -8  14  -1   -0.70    1.40
   9 -14   1  145.89   11.40
   9 -14   1  156.68   12.20
   9 -14   1  161.08   12.60
  -9  14  -1  139.89   11.40
   9  14   1  132.49   12.20
   9  14   1  140.99   11.20
  -9  14  -1  138.39   10.10
  -9  14  -1  151.08   10.50
  10 -14   1  181.68   13.60
  10 -14   1  190.38   14.60
  10 -14   1  190.08   14.50
  10  14   1  180.88   13.70
 -10  14  -1  173.58   12.10
  10  14   1  168.28   14.70
 -10  14  -1  187.48   12.60
  11 -14   1  178.38   14.00
  11 -14   1  162.28   12.80
  11 -14   1  165.58   13.70
  11  14   1  168.78   13.20
  11  14   1  160.88   14.40
  12 -14   1   89.99    9.90
  12 -14   1  117.39    9.70
  12  14   1   90.89    9.30
  12  14   1  106.59   17.50
  13 -14   1  266.27   19.50
  13 -14   1  237.28   19.10
  13 -14   1  249.08   18.00
  13  14   1  261.67   20.30
  13  14   1  271.37   18.60
  14 -14   1  113.59   10.20
  14 -14   1  110.59   11.20
  14 -14   1  106.69   11.10
  14  14   1  103.89   10.50
  14  14   1  114.39   12.40
  15 -14   1  110.79   10.30
  15 -14   1  117.79   11.70
  15 -14   1  124.09   11.70
  15  14   1  105.69   12.90
  15  14   1  113.69   12.10
  16 -14   1  183.78   14.60
  16 -14   1  216.08   20.70
  16 -14   1  163.08   15.70
  16  14   1  176.18   14.90
  16  14   1  253.87   24.70
  16 -15  -1   90.99   10.80
  16 -15  -1   97.99    9.50
  16 -15  -1   92.69   10.80
  16  15  -1   82.49   10.00
  16  15  -1   77.29   12.70
  15 -15  -1   34.00    6.10
  15 -15  -1   26.00    6.50
  15 -15  -1   34.80    7.10
  15  15  -1   41.50    8.30
  15  15  -1   31.00    6.00
  14 -15  -1  207.48   17.20
  14 -15  -1  218.58   16.10
  14 -15  -1  224.48   17.10
  14  15  -1  189.38   16.10
  14  15  -1  213.48   17.90
  13 -15  -1   19.90    4.90
  13 -15  -1   16.20    4.80
  13 -15  -1   18.30    5.00
  13  15  -1   12.30    5.10
  13  15  -1    9.30    4.20
  12 -15  -1    3.80    2.90
  12 -15  -1    1.80    2.70
  12  15  -1    4.30    3.20
  11 -15  -1   55.39    8.00
  11 -15  -1   45.70    6.50
  11 -15  -1   53.79    8.00
  11  15  -1   53.69    7.70
  11  15  -1   60.39    8.90
  10 -15  -1  342.77   22.70
 -10 -15   1  326.37   20.90
  10 -15  -1  362.76   24.00
  10 -15  -1  345.87   23.10
 -10 -15   1  321.97   21.00
  10  15  -1  384.06   24.20
  10  15  -1  315.97   22.60
 -10  15   1  351.86   21.30
   9 -15  -1    1.80    2.20
  -9 -15   1    0.30    1.60
   9 -15  -1    1.50    2.20
   9 -15  -1   -0.40    2.20
  -9  15   1    0.40    2.20
   9  15  -1    2.00    2.90
  -9  15   1   -0.10    1.40
   9  15  -1   -3.40    2.60
   8 -15  -1  436.66   29.10
  -8 -15   1  426.76   27.40
  -8 -15   1  421.86   27.00
   8 -15  -1  404.06   27.90
   8 -15  -1  441.36   28.30
  -8  15   1  439.56   26.90
   8  15  -1  518.15   28.90
  -8  15   1  453.95   27.70
   8  15  -1  488.25   29.20
  -8  15   1  449.26   28.00
  -7 -15   1  151.08   10.80
   7 -15  -1  137.29   11.30
   7 -15  -1  154.68   11.80
   7 -15  -1  144.59   12.30
  -7 -15   1  157.58   11.20
  -7  15   1  158.88   10.10
  -7  15   1  149.09   10.50
   7  15  -1  166.08   12.60
  -7  15   1  146.49   11.00
  -7  15   1  142.79   11.10
   7  15  -1  180.18   12.40
   7  15  -1  145.49   13.30
  -6 -15   1  177.18   10.90
  -6 -15   1  171.78   12.40
  -6 -15   1  193.88   13.10
  -6 -15   1  183.38   11.30
   6 -15  -1  159.28   13.40
   6 -15  -1  177.68   13.00
   6 -15  -1  175.68   12.90
  -6  15   1  173.38   12.10
   6  15  -1  178.88   13.30
  -6  15   1  175.88   12.50
  -6  15   1  191.58   12.20
   6  15  -1  201.38   15.10
  -6  15   1  198.78   14.10
   6  15  -1  189.88   13.70
  -5 -15   1    1.20    0.90
  -5 -15   1    0.50    1.20
   5 -15  -1   -0.50    2.30
   5 -15  -1    0.30    1.50
   5 -15  -1   -1.10    1.80
   5  15  -1   -0.40    1.30
  -5  15   1   -1.00    1.10
   5  15  -1    0.30    2.30
  -5  15   1    0.30    1.60
  -5  15   1   -0.50    1.60
   5  15  -1   -0.70    2.40
  -5  15   1   -1.30    1.60
   5  15  -1   -1.60    2.10
   4 -15  -1  321.67   23.10
   4 -15  -1  344.77   22.30
   4 -15  -1  385.86   22.60
  -4 -15   1  357.46   22.40
  -4 -15   1  368.26   21.40
  -4 -15   1  347.67   22.90
   4 -15  -1  365.66   23.10
   4  15  -1  362.86   22.00
   4  15  -1  303.07   23.50
  -4  15   1  363.76   22.00
  -4  15   1  413.86   23.10
  -4  15   1  360.06   22.60
  -4  15   1  333.37   21.80
  -4  15   1  353.46   22.70
   4  15  -1  360.06   22.80
   3 -15  -1  743.73   44.70
  -3 -15   1  794.82   44.70
  -3 -15   1  760.12   45.50
   3 -15  -1  743.93   43.80
   3 -15  -1  690.83   44.70
  -3 -15   1  742.33   44.00
  -3 -15   1  765.62   43.20
   3 -15  -1  845.32   44.30
  -3  15   1  729.73   43.60
  -3  15   1  683.63   44.00
   3  15  -1  734.63   43.70
  -3  15   1  703.73   44.10
   3  15  -1  710.43   45.00
   3  15  -1  786.22   44.30
   3  15  -1  738.83   47.60
   2 -15  -1  419.26   24.30
   2 -15  -1  396.26   26.30
  -2 -15   1  392.46   23.70
   2 -15  -1  390.56   25.10
  -2 -15   1  398.76   24.40
   2 -15  -1  423.86   24.10
   2 -15  -1  416.76   24.70
  -2 -15   1  427.16   25.20
   2  15  -1  439.36   26.60
  -2  15   1  377.46   25.90
   2  15  -1  366.96   25.10
   2  15  -1  322.87   24.50
   2  15  -1  366.56   24.10
  -2  15   1  382.06   24.70
  -2  15   1  392.16   24.40
  -2  15   1  394.86   24.10
  -1 -15   1   11.60    3.80
   1 -15  -1   19.50    3.50
  -1 -15   1   18.90    3.90
   1 -15  -1   14.80    3.70
  -1 -15   1   14.90    3.00
   1 -15  -1   20.80    3.00
  -1 -15   1   18.70    3.00
   1 -15  -1    9.80    2.40
   1 -15  -1   16.80    3.70
  -1 -15   1   12.50    2.50
   1  15  -1   15.20    3.20
  -1  15   1    9.70    3.00
   1  15  -1   18.80    4.00
  -1  15   1   16.20    3.00
  -1  15   1   11.60    3.10
  -1  15   1   15.30    3.20
   1  15  -1   12.00    3.20
  -1  15   1   10.50    2.80
   0 -15   1   38.60    4.30
   0 -15  -1   45.00    5.10
   0 -15  -1   37.20    3.70
   0 -15   1   24.70    4.40
   0 -15   1   30.70    4.00
   0 -15   1   30.20    5.40
   0 -15  -1   36.00    4.00
   0 -15  -1   37.10    4.90
   0 -15   1   46.30    4.70
   0  15  -1   37.50    5.20
   0  15  -1   43.10    7.00
   0  15  -1   41.70    4.80
   0  15  -1   39.80    5.10
   0  15  -1   41.00    4.70
   0  15   1   32.60    4.80
   0  15   1   40.20    4.30
   0  15   1   28.30    4.30
   0  15   1   25.50    4.10
   0  15  -1   35.70    5.00
  -1 -15  -1  752.92   44.90
   1 -15   1  643.14   45.50
  -1 -15  -1  825.12   44.40
  -1 -15  -1  733.43   46.10
   1 -15   1  804.92   45.30
  -1 -15  -1  866.41   46.20
   1 -15   1  789.72   46.10
   1 -15   1  844.02   45.60
   1  15   1  797.32   46.60
  -1  15  -1  801.12   45.80
  -1  15  -1  761.92   45.70
  -1  15  -1  800.72   45.40
  -1  15  -1  760.52   45.60
   1  15   1  658.73   45.40
   1  15   1  752.82   45.20
  -2 -15  -1 1592.94   95.79
  -2 -15  -1 1715.33   94.09
   2 -15   1 1471.85   96.49
   2 -15   1 1805.12   95.89
   2 -15   1 1650.13   96.49
   2 -15   1 1708.83   96.19
   2 -15   1 1470.35   95.79
  -2 -15  -1 1613.04   95.39
  -2 -15  -1 1703.63   94.99
  -2  15  -1 1705.23   95.49
   2  15   1 1818.92   97.19
   2  15   1 1910.21   95.49
  -2  15  -1 1755.62   95.99
   2  15   1 1450.05   95.59
   2  15   1 1617.94   95.89
  -2  15  -1 1744.73   95.99
  -2  15  -1 1690.63   95.59
  -3 -15  -1    2.40    1.60
   3 -15   1    2.20    2.00
   3 -15   1    1.70    2.10
   3 -15   1    6.70    2.60
   3 -15   1    3.40    2.50
  -3 -15  -1    0.90    2.00
   3 -15   1    2.50    1.90
  -3 -15  -1    8.00    2.00
   3  15   1    3.70    1.80
   3  15   1    1.30    2.10
  -3  15  -1    2.30    2.00
  -3  15  -1    1.60    2.00
   3  15   1    3.60    2.30
   3  15   1    1.30    3.20
  -3  15  -1    5.90    1.90
  -3  15  -1    0.20    1.70
  -4 -15  -1  623.34   39.40
  -4 -15  -1  706.13   38.70
   4 -15   1  671.33   40.90
   4 -15   1  599.44   40.10
   4 -15   1  711.83   39.80
   4 -15   1  588.54   40.10
  -4 -15  -1  634.64   39.10
  -4  15  -1  703.83   39.40
   4  15   1  670.43   39.90
   4  15   1  712.73   38.90
   4  15   1  624.44   39.80
  -4  15  -1  694.23   39.80
  -4  15  -1  662.23   39.30
   4  15   1  701.43   41.50
  -4  15  -1  645.14   39.70
  -5 -15  -1  240.88   15.50
  -5 -15  -1  244.98   14.90
   5 -15   1  231.38   16.40
   5 -15   1  236.68   16.20
   5 -15   1  236.78   16.20
  -5 -15  -1  219.08   15.60
   5 -15   1  199.18   16.50
   5  15   1  259.47   16.70
   5  15   1  248.68   15.10
  -5  15  -1  233.98   16.00
  -5  15  -1  255.57   16.40
  -5  15  -1  255.07   15.80
  -5  15  -1  252.97   15.20
  -5  15  -1  241.38   15.70
   5  15   1  257.47   18.20
   5  15   1  227.78   16.50
   6 -15   1    1.90    2.20
  -6 -15  -1    4.10    2.00
   6 -15   1    3.60    2.10
   6 -15   1    3.60    2.90
  -6 -15  -1    4.10    1.70
   6 -15   1    0.60    1.90
  -6  15  -1    1.50    1.70
  -6  15  -1    2.90    1.90
  -6  15  -1    3.90    2.40
   6  15   1    5.60    3.60
   6  15   1    1.10    1.40
   6  15   1    0.50    3.60
   6  15   1    1.70    2.80
  -6  15  -1    0.70    1.90
   7 -15   1  565.44   37.20
   7 -15   1  619.94   38.40
   7 -15   1  618.74   38.00
  -7 -15  -1  613.04   36.30
  -7 -15  -1  613.44   36.10
   7  15   1  603.64   38.00
  -7  15  -1  628.84   37.10
  -7  15  -1  604.34   36.70
  -7  15  -1  580.94   37.70
  -7  15  -1  592.54   37.50
   7  15   1  661.13   37.70
   7  15   1  708.53   40.40
   8 -15   1   17.80    4.50
  -8 -15  -1   13.60    2.70
   8 -15   1   16.50    3.90
   8 -15   1   15.20    3.80
  -8  15  -1   15.90    3.50
  -8  15  -1   17.10    3.40
   8  15   1    9.70    3.60
  -8  15  -1   17.40    3.20
   8  15   1   14.40    5.50
   8  15   1   22.30    4.50
  -8  15  -1   17.70    3.60
   9 -15   1    5.10    2.90
   9 -15   1    4.10    3.30
   9 -15   1    4.40    2.80
  -9  15  -1    7.10    2.40
  -9  15  -1    6.80    2.40
   9  15   1    4.60    3.10
   9  15   1    2.90    3.70
   9  15   1    0.90    4.20
  -9  15  -1   10.00    2.90
  10 -15   1  176.88   13.80
  10 -15   1  182.38   14.60
  10 -15   1  190.88   14.90
  10  15   1  182.38   15.10
  10  15   1  179.18   14.00
 -10  15  -1  184.58   12.60
 -10  15  -1  193.18   14.10
  11 -15   1  187.58   14.70
  11 -15   1  191.48   13.90
  11 -15   1  167.38   14.30
  11  15   1  170.38   13.70
  11  15   1  176.98   15.00
  12 -15   1   13.40    4.30
  12 -15   1   18.40    4.50
  12 -15   1   20.10    5.10
  12  15   1   14.90    5.50
  12  15   1   16.30    4.40
  13 -15   1  100.99   10.90
  13 -15   1  119.49   11.60
  13 -15   1  108.49   10.00
  13  15   1  124.09   12.80
  13  15   1  119.99   10.60
  14 -15   1    0.00    3.40
  14 -15   1    2.50    2.80
  14 -15   1    2.50    2.10
  14  15   1    4.50    3.50
  14  15   1   -5.10    3.40
  15 -15   1    6.90    3.40
  15 -15   1    8.30    3.70
  15 -15   1    7.20    4.10
  15  15   1   11.20    4.10
  15  15   1    6.40    5.70
  16 -15   1    3.10    3.00
  16 -15   1   -1.60    3.50
  16 -15   1   11.10    4.00
  16  15   1    5.80    5.10
  16  15   1    0.80    3.70
  16 -16  -1    2.30    3.90
  16 -16  -1    4.10    2.80
  16 -16  -1    1.50    3.30
  16  16  -1   -2.20    4.20
  16  16  -1   -1.00    3.40
  15 -16  -1   20.00    5.90
  15 -16  -1   31.30    6.90
  15 -16  -1   11.80    3.90
  15  16  -1   14.70    5.50
  15  16  -1   13.00    4.20
  14 -16  -1  186.28   15.50
  14 -16  -1  188.38   14.70
  14 -16  -1  196.98   16.10
  14  16  -1  177.88   16.50
  14  16  -1  168.98   16.00
  13 -16  -1   10.90    4.00
  13 -16  -1    1.10    2.90
  13 -16  -1   14.40    4.90
  13  16  -1    3.40    3.50
  13  16  -1   -0.70    3.90
  12 -16  -1    5.30    3.30
  12 -16  -1    3.90    3.40
  12 -16  -1    7.50    3.40
  12  16  -1    1.60    3.00
  12  16  -1    4.10    4.00
  11 -16  -1   16.00    4.20
  11 -16  -1   29.40    5.60
  11 -16  -1   26.10    5.80
  11  16  -1   17.60    5.00
  11  16  -1   31.50    6.30
  10 -16  -1   95.89    9.80
  10 -16  -1   89.99    8.80
 -10 -16   1  102.89    7.90
  10 -16  -1   85.39    8.90
  10  16  -1   81.79    8.80
  10  16  -1  109.99   10.40
 -10  16   1   87.39    7.40
  -9 -16   1    5.70    2.40
   9 -16  -1    2.70    2.80
   9 -16  -1    9.40    3.40
  -9 -16   1    7.00    2.30
   9 -16  -1    8.90    3.60
   9  16  -1    9.00    3.70
   9  16  -1    8.00    3.90
  -9  16   1    8.50    2.60
  -9  16   1    3.50    2.40
  -9  16   1    9.90    3.00
   8 -16  -1  601.64   39.70
  -8 -16   1  602.84   37.90
   8 -16  -1  611.84   38.90
  -8 -16   1  616.14   37.80
   8 -16  -1  586.54   38.60
  -8  16   1  628.04   38.50
  -8  16   1  642.94   36.40
   8  16  -1  725.03   40.00
   8  16  -1  604.24   40.90
  -8  16   1  671.43   38.40
   8  16  -1  688.03   39.30
   7 -16  -1   31.50    5.30
  -7 -16   1   28.20    2.80
  -7 -16   1   25.50    4.10
   7 -16  -1   22.00    4.30
   7 -16  -1   14.10    4.10
   7  16  -1   27.80    6.60
  -7  16   1   25.20    4.40
   7  16  -1   25.80    4.80
   7  16  -1   25.70    4.70
  -7  16   1   27.70    4.30
  -7  16   1   26.80    3.40
  -6 -16   1    1.70    1.60
   6 -16  -1   -0.70    2.50
   6 -16  -1    1.00    2.20
  -6 -16   1    1.10    0.70
  -6 -16   1   -0.20    1.10
   6 -16  -1    0.50    1.80
  -6 -16   1    0.80    1.90
   6  16  -1   -1.30    2.80
  -6  16   1    2.30    1.50
  -6  16   1    0.20    1.90
   6  16  -1   -1.10    2.40
   6  16  -1   -0.20    2.40
  -6  16   1    1.60    1.70
  -5 -16   1   27.70    4.20
  -5 -16   1   26.90    3.20
   5 -16  -1   22.80    4.70
  -5 -16   1   27.20    4.40
   5 -16  -1   29.60    4.60
  -5 -16   1   29.80    2.50
   5 -16  -1   33.80    5.10
   5  16  -1   32.50    6.20
  -5  16   1   33.00    4.50
   5  16  -1   34.00    4.20
   5  16  -1   42.00    5.90
  -5  16   1   32.70    4.60
  -5  16   1   30.60    4.90
   5  16  -1   25.40    4.70
   4 -16  -1    0.90    1.60
  -4 -16   1    2.00    1.10
   4 -16  -1    2.20    2.60
   4 -16  -1    0.80    2.00
  -4 -16   1   -0.60    1.80
  -4 -16   1    2.00    1.40
  -4 -16   1    5.90    2.20
   4  16  -1   -0.40    2.20
   4  16  -1    0.80    1.70
  -4  16   1    2.70    2.40
   4  16  -1    0.60    2.70
  -4  16   1   -1.00    1.70
   4  16  -1    1.30    2.40
  -4  16   1    3.10    2.20
   3 -16  -1   43.20    5.80
   3 -16  -1   38.40    4.70
  -3 -16   1   39.20    5.80
   3 -16  -1   39.30    4.60
  -3 -16   1   38.50    4.10
   3 -16  -1   45.20    5.20
  -3 -16   1   47.80    5.00
  -3 -16   1   45.20    5.70
  -3  16   1   43.70    5.60
  -3  16   1   42.40    5.10
   3  16  -1   36.20    4.80
   3  16  -1   30.50    4.80
   3  16  -1   36.30    4.70
  -2 -16   1  312.67   20.00
   2 -16  -1  310.17   18.80
   2 -16  -1  315.37   20.20
  -2 -16   1  289.37   18.50
   2 -16  -1  290.47   20.00
  -2 -16   1  335.27   20.10
  -2 -16   1  309.67   18.50
  -2 -16   1  306.47   19.30
   2 -16  -1  294.87   19.00
   2  16  -1  336.77   19.70
  -2  16   1  288.57   19.60
   2  16  -1  288.07   20.10
   2  16  -1  259.77   19.40
   2  16  -1  276.87   19.70
  -2  16   1  270.87   19.10
   1 -16  -1   45.60    4.90
  -1 -16   1   52.79    6.00
  -1 -16   1   43.30    4.60
  -1 -16   1   49.99    4.90
   1 -16  -1   53.89    4.80
   1 -16  -1   54.79    6.10
   1 -16  -1   49.20    6.10
  -1 -16   1   51.49    5.90
   1  16  -1   53.59    5.60
  -1  16   1   48.90    6.20
  -1  16   1   33.20    5.40
   1  16  -1   56.89    6.10
   1  16  -1   59.89    5.60
   1  16  -1   45.50    5.60
  -1  16   1   43.80    5.30
   0 -16  -1  349.17   21.70
   0 -16  -1  400.36   22.60
   0 -16   1  287.47   21.70
   0 -16   1  383.56   21.40
   0 -16  -1  383.06   20.80
   0 -16   1  314.57   21.00
   0 -16   1  364.36   22.50
   0 -16  -1  318.47   21.00
   0  16   1  360.26   21.60
   0  16  -1  336.17   22.00
   0  16  -1  336.07   22.00
   0  16  -1  366.76   21.80
   0  16  -1  325.27   21.60
   0  16   1  315.47   22.20
   0  16   1  306.07   21.70
   0  16   1  310.57   21.40
   1 -16   1  112.49    9.80
  -1 -16  -1  140.09   10.00
   1 -16   1  132.09    9.20
   1 -16   1   95.89    9.30
  -1 -16  -1  113.49    8.90
  -1 -16  -1  119.69    7.90
  -1 -16  -1  108.59    8.50
   1  16   1  125.49   13.90
   1  16   1  114.79    8.90
  -1  16  -1  137.99    9.50
  -1  16  -1  126.49    9.50
   1  16   1  103.79    9.00
  -1  16  -1  115.59    9.50
   1  16   1  101.19    9.20
  -2 -16  -1   95.49    8.80
  -2 -16  -1  114.49    8.50
   2 -16   1  109.69    9.50
  -2 -16  -1  109.49    7.10
   2 -16   1  128.49    8.80
  -2 -16  -1  102.59    8.00
   2 -16   1   95.09    8.90
   2 -16   1  118.89    9.20
   2 -16   1  116.79    8.80
  -2  16  -1  105.09    8.60
   2  16   1  111.69    9.90
   2  16   1   95.29    8.80
   2  16   1  110.29    8.90
   2  16   1  106.99    8.90
  -2  16  -1  113.99    8.90
   3 -16   1  548.45   34.90
   3 -16   1  537.95   34.60
   3 -16   1  494.15   35.10
   3 -16   1  663.73   34.90
  -3 -16  -1  617.44   33.90
   3  16   1  554.94   34.90
  -3  16  -1  590.54   34.50
   3  16   1  538.55   34.70
   3  16   1  569.44   34.00
   3  16   1  559.54   36.00
  -3  16  -1  619.74   35.10
   4 -16   1  121.79   10.70
  -4 -16  -1  118.99    9.40
   4 -16   1  128.99   10.20
   4 -16   1  131.69   10.10
   4 -16   1  133.39   10.20
  -4 -16  -1  141.99    9.10
   4  16   1  132.19    9.30
   4  16   1  119.39   10.30
   4  16   1  134.29   10.50
  -4  16  -1  121.49    9.50
  -4  16  -1  128.99   10.00
   4  16   1  131.89   11.70
  -5 -16  -1    4.20    2.40
   5 -16   1    4.70    2.60
   5 -16   1    6.00    2.70
   5 -16   1    1.00    2.40
   5 -16   1    7.50    3.00
  -5 -16  -1    2.80    1.60
  -5 -16  -1    5.50    1.80
  -5  16  -1    3.20    2.00
  -5  16  -1    4.20    1.90
   5  16   1    0.50    2.40
   5  16   1    4.40    3.70
  -5  16  -1    6.00    1.50
   5  16   1    4.60    1.90
  -5  16  -1    1.40    1.80
   5  16   1   -0.10    2.40
   6 -16   1    1.00    1.90
   6 -16   1   -3.20    2.30
  -6 -16  -1   -0.40    1.80
   6 -16   1    3.00    2.20
   6 -16   1   -0.60    2.00
  -6 -16  -1    2.30    1.50
   6  16   1   -1.20    1.40
   6  16   1   -0.90    3.50
   6  16   1   -0.50    2.40
   6  16   1   -0.70    2.10
  -6  16  -1   -0.30    0.80
  -6  16  -1   -0.20    1.60
  -6  16  -1    0.90    1.90
  -7 -16  -1   25.00    3.30
   7 -16   1   28.20    5.50
   7 -16   1   18.50    3.90
  -7 -16  -1   21.40    3.50
   7 -16   1   23.80    4.90
  -7  16  -1   23.90    4.30
  -7  16  -1   24.40    4.00
   7  16   1   22.30    4.30
   7  16   1   28.50    6.80
   7  16   1   22.00    4.60
   8 -16   1  152.68   12.80
   8 -16   1  131.29   11.60
   8 -16   1  164.68   12.50
  -8 -16  -1  148.09   10.10
  -8 -16  -1  150.18   10.30
   8  16   1  142.09   11.70
   8  16   1  152.48   14.20
   8  16   1  164.28   13.10
  -8  16  -1  150.08   11.40
  -8  16  -1  171.18   12.30
  -8  16  -1  150.48   11.60
   9 -16   1  139.79   11.80
   9 -16   1  131.69   10.80
   9 -16   1  119.69   11.10
  -9  16  -1  129.79   10.70
   9  16   1  138.09   13.50
  -9  16  -1  129.79   10.20
   9  16   1  117.39   11.60
   9  16   1  129.79   10.90
  -9  16  -1  123.49    9.80
  10 -16   1   24.20    5.30
  10 -16   1   28.20    5.70
  10 -16   1   21.10    4.40
  10  16   1   24.00    7.40
  10  16   1   24.80    5.30
 -10  16  -1   38.20    5.90
 -10  16  -1   21.30    3.80
 -10  16  -1   19.80    3.50
  10  16   1   17.70    5.40
  11 -16   1    8.20    4.60
  11 -16   1   10.90    3.90
  11 -16   1   14.20    4.40
  11  16   1    9.30    4.10
  11  16   1    3.10    5.30
  12 -16   1    0.50    3.00
  12 -16   1    1.30    2.80
  12  16   1    3.30    5.50
  12  16   1    0.30    3.90
  12  16   1   -0.80    2.90
  13 -16   1   59.89    8.90
  13 -16   1   50.79    7.60
  13 -16   1   61.39    8.70
  13  16   1   51.99    7.80
  13  16   1   52.59    8.60
  13  16   1   61.59   11.50
  14 -16   1  311.97   23.60
  14 -16   1  301.97   22.20
  14 -16   1  323.77   23.50
  14  16   1  365.16   25.00
  14  16   1  311.67   25.10
  14  16   1  318.37   26.50
  15 -16   1   72.89    8.70
  15 -16   1   88.19   10.30
  15 -16   1   80.79    9.90
  15  16   1   89.69   12.00
  15  16   1   76.89    9.10
  15  16   1   91.49   13.90
  16 -17  -1    6.40    3.30
  16 -17  -1   -0.60    3.70
  16 -17  -1    7.30    5.00
  16  17  -1   -1.30    4.90
  16  17  -1   -2.20    6.40
  16  17  -1   -7.20    3.40
  15 -17  -1   26.40    5.80
  15 -17  -1   25.40    6.60
  15 -17  -1   29.80    5.90
  15  17  -1   25.10    5.50
  15  17  -1   26.20    6.80
  14 -17  -1  319.07   24.30
  14 -17  -1  339.77   23.70
  14 -17  -1  336.17   23.00
  14  17  -1  303.67   24.20
  14  17  -1  320.57   23.10
  13 -17  -1    4.40    3.30
  13 -17  -1    9.20    4.00
  13 -17  -1    0.60    2.60
  13  17  -1    2.90    3.40
  13  17  -1    0.20    4.10
  12 -17  -1   13.20    7.70
  12 -17  -1   21.20    4.90
  12 -17  -1   15.40    4.40
  12  17  -1   24.50    5.40
  12  17  -1   21.00    5.80
  11 -17  -1   27.30    5.90
  11 -17  -1   17.70    4.50
  11 -17  -1   23.10    4.90
  11  17  -1   18.00    8.40
  11  17  -1   24.50   11.10
  11  17  -1   21.60    4.80
  10 -17  -1   28.20    6.10
 -10 -17   1   32.50    4.30
  10 -17  -1   40.40    6.50
  10 -17  -1   21.40    4.70
  10  17  -1   29.20    5.70
 -10  17   1   34.90    5.50
  10  17  -1   30.50    6.40
  10  17  -1   30.30    7.40
  -9 -17   1   -0.10    1.90
   9 -17  -1    0.30    2.50
   9 -17  -1    2.20    2.80
  -9 -17   1    2.00    1.80
   9 -17  -1    3.20    2.90
   9  17  -1    9.90    4.50
  -9  17   1    2.80    2.50
   9  17  -1    2.10    3.30
   9  17  -1   -2.40    2.50
  -9  17   1    0.90    1.90
   8 -17  -1  222.78   15.90
   8 -17  -1  200.08   16.70
   8 -17  -1  209.98   15.90
  -8 -17   1  203.28   14.90
  -8  17   1  238.18   15.80
   8  17  -1  236.98   16.90
  -8  17   1  234.78   15.30
   8  17  -1  236.18   16.50
   8  17  -1  201.28   17.70
   7 -17  -1   14.20    3.80
  -7 -17   1   18.20    2.50
   7 -17  -1   16.60    3.80
   7 -17  -1   13.60    4.30
  -7 -17   1   17.60    3.50
  -7 -17   1   15.70    3.60
   7  17  -1   15.40    5.10
   7  17  -1   17.70    4.70
  -7  17   1   15.30    3.40
   7  17  -1   12.60    4.00
  -7  17   1   10.90    3.50
  -7  17   1   19.10    2.80
  -6 -17   1    5.20    2.10
   6 -17  -1    0.80    2.70
   6 -17  -1    7.30    2.90
  -6 -17   1    6.00    1.80
  -6 -17   1    5.20    2.70
   6 -17  -1   -0.10    2.10
   6  17  -1    5.70    2.90
  -6  17   1    5.00    2.20
  -6  17   1    7.50    2.80
   6  17  -1    4.90    3.40
   6  17  -1    1.00    2.70
  -6  17   1    5.40    2.20
   5 -17  -1   88.39    7.80
  -5 -17   1   98.29    8.20
   5 -17  -1  102.79    8.20
  -5 -17   1   90.19    6.60
   5 -17  -1   76.89    8.40
  -5 -17   1   85.29    5.80
  -5 -17   1   81.39    7.40
  -5  17   1   99.99    7.60
   5  17  -1   87.89    8.40
   5  17  -1   83.69    8.30
  -5  17   1   95.79    7.90
   5  17  -1   82.69    7.10
   5  17  -1   82.69    9.20
  -5  17   1   70.89    7.40
  -4 -17   1  154.68   12.20
  -4 -17   1  158.78   10.10
   4 -17  -1  174.18   13.20
   4 -17  -1  179.88   12.20
  -4 -17   1  173.08   11.00
  -4  17   1  158.38   12.30
   4  17  -1  146.79   11.30
   4  17  -1  154.48   13.30
   4  17  -1  177.68   12.70
  -4  17   1  167.88   11.60
   4  17  -1  148.69   12.30
  -4  17   1  180.58   12.70
  -4  17   1  157.88   12.10
   3 -17  -1   40.10    4.90
  -3 -17   1   44.00    6.00
  -3 -17   1   49.40    4.30
  -3 -17   1   40.10    4.30
   3 -17  -1   46.00    6.60
   3 -17  -1   50.79    5.10
  -3  17   1   45.40    6.20
   3  17  -1   28.40    5.20
   3  17  -1   38.00    6.00
  -3  17   1   38.00    5.40
   3  17  -1   41.00    5.70
   3  17  -1   37.40    4.70
   2 -17  -1   71.89    6.30
   2 -17  -1   77.69    7.60
  -2 -17   1   72.69    7.50
   2 -17  -1   62.59    6.30
  -2 -17   1   84.49    7.60
  -2 -17   1   65.79    6.00
  -2 -17   1   80.29    6.10
  -2  17   1   61.69    6.70
   2  17  -1   76.89    7.10
   2  17  -1   73.49    9.90
   2  17  -1   71.09    6.60
   2  17  -1   61.99    7.10
  -2  17   1   67.19    7.40
   1 -17  -1    1.30    1.70
  -1 -17   1    2.60    1.80
  -1 -17   1    5.30    2.70
   1 -17  -1    1.70    1.80
  -1 -17   1    4.30    2.10
   1 -17  -1    3.60    2.60
  -1 -17   1    4.10    2.40
  -1  17   1    3.00    2.60
   1  17  -1    3.10    2.10
  -1  17   1    3.90    2.80
  -1  17   1   -0.90    1.70
   1  17  -1    3.80    2.70
   1  17  -1    0.80    2.30
   1  17  -1    6.40    3.00
   0 -17  -1  162.88   10.90
   0 -17   1  170.38   11.70
   0 -17  -1  176.08   12.80
   0 -17   1  138.69   12.30
   0 -17   1  183.88   11.80
   0 -17   1  176.08   12.90
   0  17   1  153.68   12.00
   0  17  -1  179.48   12.60
   0  17  -1  172.18   12.60
   0  17  -1  169.98   12.20
   0  17   1  163.78   12.70
   0  17   1  148.19   12.20
  -1 -17  -1   87.79    6.20
   1 -17   1   81.29    8.20
   1 -17   1   93.49    7.50
  -1 -17  -1   80.89    7.80
   1 -17   1   82.69    7.20
   1 -17   1   73.19    7.90
  -1 -17  -1   86.89    7.00
   1  17   1   76.19    8.20
  -1  17  -1   95.79    8.20
  -1  17  -1   92.09    7.80
   1  17   1   77.59    7.60
   1  17   1   74.89    7.70
  -1  17  -1   95.49    7.80
   1  17   1   90.79    7.30
  -2 -17  -1  402.56   25.00
  -2 -17  -1  399.16   24.50
   2 -17   1  379.36   25.90
  -2 -17  -1  419.16   23.40
  -2 -17  -1  372.06   25.30
   2 -17   1  411.66   25.10
   2 -17   1  412.86   25.90
   2 -17   1  421.36   25.20
  -2  17  -1  405.56   25.20
  -2  17  -1  446.06   25.60
   2  17   1  369.96   25.30
   2  17   1  384.96   25.20
   2  17   1  382.16   24.70
   2  17   1  405.36   26.50
  -3 -17  -1   15.90    3.50
  -3 -17  -1   19.40    3.20
   3 -17   1   13.20    4.00
   3 -17   1   13.70    3.50
  -3 -17  -1   17.90    3.40
   3 -17   1   20.50    3.90
   3  17   1   13.90    4.40
  -3  17  -1   13.40    3.50
   3  17   1   15.40    4.10
  -3  17  -1   20.60    3.80
   3  17   1   16.70    3.70
   4 -17   1  441.66   27.40
  -4 -17  -1  441.16   26.20
   4 -17   1  416.76   27.30
   4 -17   1  399.56   27.90
  -4 -17  -1  425.16   26.70
  -4 -17  -1  417.46   27.00
   4 -17   1  490.15   27.50
   4  17   1  418.66   27.40
  -4  17  -1  436.86   26.80
   4  17   1  406.76   28.60
  -4  17  -1  443.06   27.20
   4  17   1  458.75   27.70
   4  17   1  437.66   26.40
   5 -17   1    5.30    2.90
  -5 -17  -1    3.60    2.20
  -5 -17  -1    3.60    1.80
   5 -17   1    4.20    2.70
  -5 -17  -1    7.60    2.40
   5 -17   1    6.60    2.80
   5  17   1    4.00    3.40
   5  17   1    6.00    3.00
   5  17   1    4.10    3.10
  -5  17  -1    6.50    1.60
  -5  17  -1    4.30    2.40
  -5  17  -1    1.50    2.20
  -5  17  -1    6.50    1.90
   5  17   1    7.30    2.10
   6 -17   1    6.70    2.90
   6 -17   1    3.00    2.90
  -6 -17  -1   10.70    2.40
  -6 -17  -1    5.00    2.40
   6 -17   1    8.80    3.00
  -6  17  -1    6.90    2.60
   6  17   1   10.40    4.50
  -6  17  -1    6.60    1.70
  -6  17  -1    5.80    2.70
   6  17   1    7.90    2.10
   6  17   1    6.00    3.00
   6  17   1    6.10    3.40
   7 -17   1    2.10    2.40
  -7 -17  -1    4.00    1.50
   7 -17   1   -0.20    2.50
   7 -17   1    2.10    2.20
  -7  17  -1    0.30    1.90
   7  17   1   -1.20    2.30
  -7  17  -1    4.00    2.40
   7  17   1    6.10    4.50
   7  17   1    1.90    3.10
  -8 -17  -1  101.09    7.60
   8 -17   1  109.69   10.30
  -8 -17  -1  100.99    7.30
   8 -17   1   91.69    9.00
   8 -17   1  109.09    9.80
  -8  17  -1   82.59    8.20
   8  17   1   98.59   11.10
   8  17   1   97.79    9.10
   8  17   1   94.79    9.90
  -8  17  -1  104.49    9.00
   9 -17   1   27.10    5.10
   9 -17   1   28.80    5.20
   9 -17   1   30.10    6.10
  -9  17  -1   34.60    5.40
   9  17   1   25.70    6.80
   9  17   1   24.90    5.30
   9  17   1   28.30    6.00
  10 -17   1  422.16   27.60
  10 -17   1  409.36   26.40
  10 -17   1  390.06   26.80
  10  17   1  427.76   27.60
  10  17   1  382.66   26.20
 -10  17  -1  382.26   26.10
  10  17   1  384.26   29.10
  11 -17   1    0.40    3.30
  11 -17   1   -1.20    2.10
  11 -17   1   -2.40    2.30
  11  17   1   -1.90    3.40
  11  17   1   -2.00    3.50
  11  17   1    5.60    3.10
  12 -17   1   54.69   11.00
  12 -17   1   48.30    8.10
  12 -17   1   61.49    7.30
  12  17   1   45.70    7.20
  12  17   1   48.50    8.40
  12  17   1   70.39   11.30
  13 -17   1    4.70    3.80
  13 -17   1   -2.90    2.90
  13 -17   1    0.40    2.80
  13  17   1   -0.90    4.70
  13  17   1   -1.00    2.90
  13  17   1    7.20    4.60
  14 -17   1    3.70    2.80
  14 -17   1   -3.30    3.20
  14 -17   1    3.90    4.00
  14  17   1    0.20    5.00
  14  17   1    1.10    6.90
  14  17   1    0.50    3.10
  15 -17   1   -4.20    3.20
  15 -17   1    4.60    4.10
  15 -17   1    2.90    3.40
  15  17   1   -4.60    3.20
  15  17   1    3.70    8.70
  15 -18  -1   23.90    5.90
  15 -18  -1   18.00    6.20
  15  18  -1   23.90    5.30
  15  18  -1   20.90   13.20
  14 -18  -1   22.00    5.70
  14 -18  -1   29.60    5.90
  14 -18  -1   14.60    5.50
  14  18  -1   27.10    7.00
  14  18  -1   16.30    7.80
  14  18  -1   20.60    5.00
  13 -18  -1   20.30    4.90
  13 -18  -1   19.20    5.30
  13 -18  -1   18.90    5.40
  13  18  -1   16.40    6.00
  13  18  -1   11.60    7.10
  13  18  -1    9.10    4.70
  12 -18  -1    1.70    2.60
  12 -18  -1    0.90    2.70
  12 -18  -1   -2.00    3.60
  12  18  -1    4.50    4.60
  12  18  -1    4.30    4.40
  12  18  -1    1.80    3.20
  11 -18  -1  218.78   19.20
  11 -18  -1  243.98   18.10
  11 -18  -1  214.68   18.50
  11  18  -1  248.08   17.90
  11  18  -1  228.08   20.70
  11  18  -1  259.57   19.10
  10 -18  -1   35.80    5.90
  10 -18  -1   31.80    6.20
 -10 -18   1   36.30    4.70
  10 -18  -1   19.80    4.80
  10  18  -1   32.50    6.50
  10  18  -1   30.50    6.00
  10  18  -1   28.60    7.50
 -10  18   1   32.20    5.60
  -9 -18   1   30.80    4.50
   9 -18  -1   20.70    4.80
   9 -18  -1   14.60    4.10
  -9 -18   1   29.00    4.60
   9 -18  -1   22.50    5.20
   9  18  -1   28.70    5.60
   9  18  -1   34.10    7.20
   9  18  -1   30.10    6.40
  -9  18   1   36.70    5.00
  -9  18   1   25.80    5.00
  -8 -18   1  236.28   16.70
   8 -18  -1  255.77   17.90
   8 -18  -1  239.38   17.60
   8 -18  -1  224.98   18.40
  -8 -18   1  239.48   16.60
   8  18  -1  247.48   17.90
   8  18  -1  235.28   19.50
  -8  18   1  266.47   17.50
   8  18  -1  298.17   18.90
  -8  18   1  239.28   16.70
   7 -18  -1  101.39   10.50
   7 -18  -1  109.69    9.90
  -7 -18   1  104.69    9.30
  -7 -18   1  113.29    8.80
  -7 -18   1  109.59    7.70
   7 -18  -1  118.49   10.00
  -7  18   1  116.49    8.20
   7  18  -1  122.39   10.70
  -7  18   1  111.99    9.50
  -7  18   1  122.09    9.20
   7  18  -1  113.39   10.30
   7  18  -1   99.79   11.50
   6 -18  -1   10.90    4.10
   6 -18  -1    4.10    2.60
  -6 -18   1   11.00    2.30
  -6 -18   1    7.80    3.20
   6 -18  -1    8.40    3.10
  -6  18   1   10.50    3.00
   6  18  -1   12.10    4.60
   6  18  -1    5.90    3.30
  -6  18   1   10.50    3.40
  -6  18   1    9.70    3.00
   6  18  -1    9.80    3.90
  -5 -18   1  328.27   18.70
   5 -18  -1  281.17   21.50
  -5 -18   1  307.67   18.60
   5 -18  -1  318.17   20.90
  -5 -18   1  333.77   21.10
   5 -18  -1  326.97   20.70
  -5 -18   1  317.27   19.40
   5  18  -1  298.47   19.90
  -5  18   1  311.17   20.60
  -5  18   1  292.07   19.90
   5  18  -1  359.96   21.60
  -5  18   1  323.67   20.80
   5  18  -1  286.87   22.00
   5  18  -1  314.17   21.30
  -4 -18   1  478.75   29.30
  -4 -18   1  466.85   28.40
  -4 -18   1  505.55   28.90
   4 -18  -1  517.45   31.90
  -4 -18   1  448.56   30.60
   4 -18  -1  487.45   30.20
   4 -18  -1  535.55   30.80
  -4  18   1  505.65   30.70
   4  18  -1  457.05   29.90
  -4  18   1  499.55   31.00
   4  18  -1  537.55   31.10
   4  18  -1  441.56   30.80
  -4  18   1  510.55   31.10
   4  18  -1  512.95   32.20
  -4  18   1  498.15   30.00
   3 -18  -1    1.70    2.60
  -3 -18   1    3.80    1.70
   3 -18  -1    3.50    2.10
  -3 -18   1    2.60    1.70
  -3 -18   1    2.50    2.10
   3 -18  -1    0.10    2.10
   3  18  -1    1.40    2.80
   3  18  -1    2.30    2.50
  -3  18   1    2.80    2.60
   3  18  -1    3.30    1.80
  -3  18   1    2.40    2.50
   3  18  -1    8.40    3.70
   2 -18  -1 1885.11  105.09
   2 -18  -1 1687.43  105.29
  -2 -18   1 1842.22  106.39
  -2 -18   1 1730.13  105.69
   2 -18  -1 2114.99  107.29
  -2 -18   1 1988.80  104.79
   2  18  -1 2026.60  106.19
  -2  18   1 1785.12  105.79
   2  18  -1 1841.32  106.79
   2  18  -1 1604.04  105.89
  -2  18   1 1792.22  106.09
  -1 -18   1  224.58   15.50
  -1 -18   1  237.18   16.90
  -1 -18   1  247.98   15.50
   1 -18  -1  254.47   15.40
   1 -18  -1  244.88   17.00
   1 -18  -1  237.98   15.80
  -1  18   1  236.58   16.80
   1  18  -1  207.68   16.30
   1  18  -1  246.28   16.40
  -1  18   1  229.88   16.20
   1  18  -1  234.78   16.70
   0 -18  -1  151.88   11.40
   0 -18   1  137.79   10.00
   0 -18  -1  132.39    9.90
   0 -18  -1  136.69    9.30
   0 -18   1  139.49   11.30
   0 -18   1  130.39    9.80
   0  18  -1  133.79   10.90
   0  18   1  113.29   10.50
   0  18   1  129.99   10.50
   0  18   1  135.39   11.20
   0  18  -1  143.39   12.00
   0  18  -1  127.59   10.40
  -1 -18  -1   73.59    5.60
  -1 -18  -1   68.59    7.20
   1 -18   1   64.79    7.60
  -1 -18  -1   79.89    6.50
   1 -18   1   66.99    6.50
   1 -18   1   69.59    6.60
   1  18   1   74.79    7.40
   1  18   1   61.59    7.10
  -1  18  -1   80.99    7.80
  -1  18  -1   79.29    7.30
  -1  18  -1   65.89    8.60
   1  18   1   70.09    7.80
   2 -18   1   16.90    3.40
  -2 -18  -1   18.70    2.30
  -2 -18  -1   19.30    4.10
   2 -18   1   15.60    3.20
   2 -18   1   13.20    3.80
  -2 -18  -1   15.10    3.10
   2  18   1   10.90    3.60
   2  18   1   14.10    3.70
   2  18   1   20.70    3.60
  -2  18  -1   11.70    3.90
   2  18   1   21.70    4.80
  -2  18  -1   20.00    4.30
   3 -18   1   75.99    7.40
  -3 -18  -1   84.19    7.90
   3 -18   1   75.09    7.40
  -3 -18  -1   82.09    7.30
  -3 -18  -1   82.69    6.90
   3 -18   1   79.19    8.50
   3  18   1   75.19    7.80
   3  18   1   78.29    7.00
   3  18   1   89.49    8.30
   3  18   1   74.99    8.70
  -3  18  -1  102.79    8.30
  -4 -18  -1  458.45   28.20
   4 -18   1  486.45   29.40
  -4 -18  -1  494.65   29.40
   4 -18   1  480.85   29.50
   4 -18   1  412.16   30.00
  -4 -18  -1  479.25   29.00
   4  18   1  458.25   31.00
   4  18   1  467.35   29.70
  -4  18  -1  491.95   29.50
   4  18   1  479.95   29.80
  -4  18  -1  443.46   29.70
  -4  18  -1  471.45   27.80
  -5 -18  -1   70.69    6.90
  -5 -18  -1   70.19    6.50
  -5 -18  -1   67.59    5.90
   5 -18   1   89.89    7.70
   5 -18   1   81.69    7.70
   5 -18   1   47.50    7.50
   5  18   1   75.29    8.80
   5  18   1   72.49    7.80
  -5  18  -1   70.99    7.00
   5  18   1   69.09    7.60
  -5  18  -1   58.69    6.50
   5  18   1   71.19    6.10
  -5  18  -1   67.79    5.30
  -5  18  -1   79.49    6.50
  -6 -18  -1    1.50    2.20
   6 -18   1    2.30    2.00
   6 -18   1    6.60    3.40
   6 -18   1    2.50    2.60
  -6 -18  -1   -0.60    1.50
  -6  18  -1    3.40    2.60
  -6  18  -1    2.60    2.30
   6  18   1    0.50    2.60
   6  18   1    3.80    3.60
  -6  18  -1    1.20    1.20
   6  18   1    2.00    1.80
  -6  18  -1    2.00    1.50
   6  18   1   -0.60    2.80
   7 -18   1    5.10    3.20
   7 -18   1    4.70    2.60
   7 -18   1   -0.30    2.40
  -7 -18  -1    0.50    1.90
  -7 -18  -1    1.60    1.80
   7  18   1   -2.20    2.70
   7  18   1    1.50    3.80
  -7  18  -1    5.00    2.60
  -7  18  -1   -0.70    1.70
   7  18   1    4.30    3.00
   8 -18   1   60.09    8.20
   8 -18   1   41.40    6.20
   8 -18   1   57.89    7.10
  -8  18  -1   58.99    6.40
   8  18   1   45.40    7.20
   8  18   1   63.29    7.70
  -8  18  -1   65.79    6.90
   8  18   1   60.59   10.10
   9 -18   1   31.60    6.00
   9 -18   1   50.39    7.50
   9 -18   1   44.50    6.80
   9  18   1   37.20    8.00
  -9  18  -1   51.49    7.10
   9  18   1   38.70    6.80
   9  18   1   45.50    6.70
  10 -18   1   70.49    9.70
  10 -18   1   60.89    9.30
  10 -18   1   39.40    6.80
 -10  18  -1   50.19    6.40
  10  18   1   49.10    7.30
  10  18   1   56.49   13.30
  11 -18   1   22.20    5.20
  11 -18   1   28.10    7.80
  11 -18   1   31.00    6.10
  11  18   1   25.30    6.20
  11  18   1   28.00    5.40
  11  18   1   27.60    7.70
  12 -18   1    6.60    4.00
  12 -18   1    5.30    3.70
  12 -18   1    4.50    3.50
  12  18   1    7.20    3.70
  12  18   1    1.30    4.50
  12  18   1    9.80    5.80
  13 -18   1    7.10    4.50
  13 -18   1    7.10    3.50
  13 -18   1   10.50    4.40
  13  18   1   12.60    5.30
  13  18   1   11.40    7.00
  13  18   1    1.80    3.80
  14 -18   1   88.59   10.40
  14 -18   1   88.99   12.00
  14 -18   1   92.69    9.80
  14  18   1   91.99   10.00
  14  18   1   86.59   11.60
[truncated: 3,595,439 more chars]
