# Supplementary material for: Nucleophilic Substitution at a Coordinatively Saturated Five-Membered NHC∙Haloborane Centre
Source: MDPI journal article supplement (doi:10.3390/inorganics10070097), 2022-07-07
Supplement: s1 [file s1 › Cif_3.cif]

data_mo_gargi_5_sbf5_16_11_21_0m_a
_audit_creation_date               2022-06-05
_audit_creation_method
;
Olex2 1.5
(compiled 2021.08.20 svn.r13c46975 for OlexSys, GUI svn.r6405)
;
_audit_contact_author_address      ?
_audit_contact_author_email        ?
_audit_contact_author_name         ''
_audit_contact_author_phone        ?
_publ_contact_author_id_orcid      ?
_publ_section_references
;
Dolomanov, O.V., Bourhis, L.J., Gildea, R.J, Howard, J.A.K. & Puschmann, H.
 (2009), J. Appl. Cryst. 42, 339-341.

Sheldrick, G.M. (2008). Acta Cryst. A64, 112-122.

Sheldrick, G.M. (2015). Acta Cryst. C71, 3-8.
;
_chemical_name_common              ?
_chemical_name_systematic
;
 ? 
;
_chemical_formula_moiety           'C27 H41 B N2 O3'
_chemical_formula_sum              'C27 H41 B N2 O3'
_chemical_formula_weight           452.43
_chemical_melting_point            ?
loop_
  _atom_type_symbol
  _atom_type_description
  _atom_type_scat_dispersion_real
  _atom_type_scat_dispersion_imag
  _atom_type_scat_source
 'C' 'C' 0.0033 0.0016 'International Tables Vol C Tables 4.2.6.8 and 6.1.1.4'
 'H' 'H' 0.0000 0.0000 'International Tables Vol C Tables 4.2.6.8 and 6.1.1.4'
 'B' 'B' 0.0013 0.0007 'International Tables Vol C Tables 4.2.6.8 and 6.1.1.4'
 'N' 'N' 0.0061 0.0033 'International Tables Vol C Tables 4.2.6.8 and 6.1.1.4'
 'O' 'O' 0.0106 0.0060 'International Tables Vol C Tables 4.2.6.8 and 6.1.1.4'

_space_group_crystal_system        'monoclinic'
_space_group_IT_number             14
_space_group_name_H-M_alt          'P 1 21/c 1'
_space_group_name_Hall             '-P 2ybc'
loop_
  _space_group_symop_id
  _space_group_symop_operation_xyz
 1 'x, y, z'
 2 '-x, y+1/2, -z+1/2'
 3 '-x, -y, -z'
 4 'x, -y-1/2, z-1/2'

_cell_length_a                     12.8167(19)
_cell_length_b                     15.081(2)
_cell_length_c                     14.264(2)
_cell_angle_alpha                  90.00
_cell_angle_beta                   108.660(3)
_cell_angle_gamma                  90.00
_cell_volume                       2612.1(6)
_cell_formula_units_Z              4
_cell_measurement_reflns_used      9912
_cell_measurement_temperature      296(2)
_cell_measurement_theta_max        21.14
_cell_measurement_theta_min        2.30
_exptl_absorpt_coefficient_mu      0.074
_exptl_absorpt_correction_T_max    ?
_exptl_absorpt_correction_T_min    ?
_exptl_absorpt_correction_type     ?
_exptl_absorpt_process_details     ?
_exptl_crystal_colour              colorless
_exptl_crystal_density_diffrn      1.153
_exptl_crystal_density_meas        ?
_exptl_crystal_density_method      'not measured'
_exptl_crystal_description         block
_exptl_crystal_F_000               988
_exptl_crystal_size_max            0.2
_exptl_crystal_size_mid            0.2
_exptl_crystal_size_min            0.2
_exptl_special_details
;
 ? 
;
_diffrn_reflns_av_R_equivalents    0.3107
_diffrn_reflns_av_unetI/netI       0.1569
_diffrn_reflns_limit_h_max         17
_diffrn_reflns_limit_h_min         -17
_diffrn_reflns_limit_k_max         20
_diffrn_reflns_limit_k_min         -20
_diffrn_reflns_limit_l_max         19
_diffrn_reflns_limit_l_min         -19
_diffrn_reflns_number              113995
_diffrn_reflns_theta_full          25.00
_diffrn_reflns_theta_max           28.48
_diffrn_reflns_theta_min           2.02
_diffrn_ambient_temperature        296.15
_diffrn_detector_area_resol_mean   ?
_diffrn_measured_fraction_theta_full  1.000
_diffrn_measured_fraction_theta_max  0.993
_diffrn_measurement_device_type    'Bruker APEX-II CCD'
_diffrn_measurement_method         '\f and \w scans'
_diffrn_radiation_monochromator    graphite
_diffrn_radiation_type             MoK\a
_diffrn_radiation_wavelength       0.71073
_diffrn_source                     'fine-focus sealed tube'
_diffrn_standards_decay_%          ?
_diffrn_standards_interval_count   ?
_diffrn_standards_interval_time    ?
_diffrn_standards_number           ?
_reflns_number_gt                  3021
_reflns_number_total               6560
_reflns_threshold_expression       >2sigma(I)
_computing_cell_refinement         ?
_computing_data_collection         ?
_computing_data_reduction          ?
_computing_molecular_graphics      'Olex2 1.5 (Dolomanov et al., 2009)'
_computing_publication_material    'Olex2 1.5 (Dolomanov et al., 2009)'
_computing_structure_refinement    'ShelXL (Sheldrick, 2015)'
_computing_structure_solution      'ShelXS (Sheldrick, 2008)'
_refine_diff_density_max           0.323
_refine_diff_density_min           -0.420
_refine_diff_density_rms           0.062
_refine_ls_extinction_coef         0.0036(10)
_refine_ls_extinction_expression  
 'Fc^*^=kFc[1+0.001xFc^2^\l^3^/sin(2\q)]^-1/4^'
_refine_ls_extinction_method       SHELXL
_refine_ls_goodness_of_fit_ref     1.043
_refine_ls_hydrogen_treatment      constr
_refine_ls_matrix_type             full
_refine_ls_number_parameters       310
_refine_ls_number_reflns           6560
_refine_ls_number_restraints       0
_refine_ls_R_factor_all            0.2309
_refine_ls_R_factor_gt             0.0985
_refine_ls_restrained_S_all        1.043
_refine_ls_shift/su_max            0.000
_refine_ls_shift/su_mean           0.000
_refine_ls_structure_factor_coef   Fsqd
_refine_ls_weighting_details      
 'calc w=1/[\s^2^(Fo^2^)+(0.0709P)^2^+2.6855P] where P=(Fo^2^+2Fc^2^)/3'
_refine_ls_weighting_scheme        calc
_refine_ls_wR_factor_gt            0.1721
_refine_ls_wR_factor_ref           0.2185
_refine_special_details
;
 Refinement of F^2^ against ALL reflections.  The weighted R-factor wR and 
 goodness of fit S are based on F^2^, conventional R-factors R are based 
 on F, with F set to zero for negative F^2^. The threshold expression of 
 F^2^ > 2sigma(F^2^) is used only for calculating R-factors(gt) etc. and is 
 not relevant to the choice of reflections for refinement.  R-factors based 
 on F^2^ are statistically about twice as large as those based on F, and R- 
 factors based on ALL data will be even larger. 
;
_olex2_refinement_description
;
1.a Ternary CH refined with riding coordinates:
 C22(H22), C25(H25), C13(H13), C10(H10)
1.b Secondary CH2 refined with riding coordinates:
 C2(H2A,H2B), C3(H3A,H3B)
1.c Aromatic/amide H refined with riding coordinates:
 C18(H18), C19(H19), C20(H20), C6(H6), C7(H7), C8(H8)
1.d Idealised Me refined as rotating group:
 C27(H27A,H27B,H27C), C23(H23A,H23B,H23C), C24(H24A,H24B,H24C), C26(H26A,H26B,
 H26C), C11(H11A,H11B,H11C), C12(H12A,H12B,H12C), C14(H14A,H14B,H14C), C15(H15A,
 H15B,H15C)
1.e Idealised tetrahedral OH refined as rotating group:
 O1(H1), O2(H2), O3(H3)
;
_atom_sites_solution_hydrogens     geom
_atom_sites_solution_primary       direct
_atom_sites_solution_secondary     difmap
loop_
  _atom_site_label
  _atom_site_type_symbol
  _atom_site_fract_x
  _atom_site_fract_y
  _atom_site_fract_z
  _atom_site_U_iso_or_equiv
  _atom_site_adp_type
  _atom_site_occupancy
  _atom_site_calc_flag
  _atom_site_disorder_assembly
  _atom_site_disorder_group
  _atom_site_refinement_flags_posn
 N1 N -0.7477(2) 0.32886(17) 0.44802(18) 0.0260(6) Uani 1 d . . .
 N2 N -0.6463(2) 0.21646(17) 0.51585(18) 0.0263(6) Uani 1 d . . .
 C27 C -0.8668(3) 0.0558(3) 0.5963(3) 0.0610(12) Uani 1 d . . .
 H27A H -0.8593 -0.0064 0.6111 0.091 Uiso 1 calc . . GR
 H27B H -0.9432 0.0698 0.5654 0.091 Uiso 1 calc . . GR
 H27C H -0.8384 0.0892 0.6564 0.091 Uiso 1 calc . . GR
 C1 C -0.7074(2) 0.2835(2) 0.5306(2) 0.0245(7) Uani 1 d . . .
 C2 C -0.7129(3) 0.2943(2) 0.3662(2) 0.0330(8) Uani 1 d . . .
 H2A H -0.6700 0.3378 0.3443 0.040 Uiso 1 calc . . R
 H2B H -0.7758 0.2768 0.3105 0.040 Uiso 1 calc . . R
 C3 C -0.6433(3) 0.2149(2) 0.4131(2) 0.0335(8) Uani 1 d . . .
 H3A H -0.6748 0.1604 0.3799 0.040 Uiso 1 calc . . R
 H3B H -0.5686 0.2209 0.4115 0.040 Uiso 1 calc . . R
 C17 C -0.6798(3) 0.0707(2) 0.5765(3) 0.0339(8) Uani 1 d . . .
 C16 C -0.6063(2) 0.1392(2) 0.5767(2) 0.0257(7) Uani 1 d . . .
 C18 C -0.6359(3) -0.0079(2) 0.6239(3) 0.0401(9) Uani 1 d . . .
 H18 H -0.6830 -0.0547 0.6244 0.048 Uiso 1 calc . . R
 C19 C -0.5252(3) -0.0180(2) 0.6697(3) 0.0395(9) Uani 1 d . . .
 H19 H -0.4978 -0.0716 0.6998 0.047 Uiso 1 calc . . R
 C20 C -0.4544(3) 0.0509(2) 0.6714(3) 0.0368(9) Uani 1 d . . .
 H20 H -0.3794 0.0437 0.7037 0.044 Uiso 1 calc . . R
 C21 C -0.4933(3) 0.1315(2) 0.6255(2) 0.0305(8) Uani 1 d . . .
 C22 C -0.4139(3) 0.2069(2) 0.6327(3) 0.0359(9) Uani 1 d . . .
 H22 H -0.4562 0.2578 0.5976 0.043 Uiso 1 calc . . R
 C23 C -0.3276(3) 0.1847(3) 0.5839(3) 0.0542(11) Uani 1 d . . .
 H23A H -0.2840 0.1355 0.6176 0.081 Uiso 1 calc . . GR
 H23B H -0.2809 0.2352 0.5874 0.081 Uiso 1 calc . . GR
 H23C H -0.3634 0.1692 0.5159 0.081 Uiso 1 calc . . GR
 C24 C -0.3602(3) 0.2338(3) 0.7412(3) 0.0503(11) Uani 1 d . . .
 H24A H -0.4163 0.2502 0.7691 0.075 Uiso 1 calc . . GR
 H24B H -0.3119 0.2833 0.7448 0.075 Uiso 1 calc . . GR
 H24C H -0.3187 0.1848 0.7775 0.075 Uiso 1 calc . . GR
 C26 C -0.8420(3) 0.0262(3) 0.4321(3) 0.0698(14) Uani 1 d . . .
 H26A H -0.8336 -0.0360 0.4473 0.105 Uiso 1 calc . . GR
 H26B H -0.7991 0.0418 0.3904 0.105 Uiso 1 calc . . GR
 H26C H -0.9182 0.0390 0.3985 0.105 Uiso 1 calc . . GR
 C25 C -0.8030(3) 0.0790(3) 0.5268(3) 0.0445(10) Uani 1 d . . .
 H25 H -0.8181 0.1415 0.5087 0.053 Uiso 1 calc . . R
 C4 C -0.8283(3) 0.3991(2) 0.4286(2) 0.0295(8) Uani 1 d . . .
 C5 C -0.9411(3) 0.3759(2) 0.3943(2) 0.0372(9) Uani 1 d . . .
 C6 C -1.0170(3) 0.4444(3) 0.3707(3) 0.0484(11) Uani 1 d . . .
 H6 H -1.0918 0.4310 0.3484 0.058 Uiso 1 calc . . R
 C7 C -0.9845(4) 0.5315(3) 0.3796(3) 0.0534(11) Uani 1 d . . .
 H7 H -1.0369 0.5765 0.3638 0.064 Uiso 1 calc . . R
 C8 C -0.8748(3) 0.5523(3) 0.4117(3) 0.0457(10) Uani 1 d . . .
 H8 H -0.8539 0.6116 0.4168 0.055 Uiso 1 calc . . R
 C9 C -0.7935(3) 0.4873(2) 0.4369(2) 0.0353(9) Uani 1 d . . .
 C11 C -0.6423(4) 0.5447(3) 0.3794(3) 0.0611(12) Uani 1 d . . .
 H11A H -0.6595 0.4997 0.3292 0.092 Uiso 1 calc . . GR
 H11B H -0.5649 0.5574 0.3995 0.092 Uiso 1 calc . . GR
 H11C H -0.6831 0.5975 0.3536 0.092 Uiso 1 calc . . GR
 C12 C -0.6413(4) 0.5792(3) 0.5521(3) 0.0590(12) Uani 1 d . . .
 H12A H -0.6795 0.6339 0.5300 0.089 Uiso 1 calc . . GR
 H12B H -0.5633 0.5894 0.5723 0.089 Uiso 1 calc . . GR
 H12C H -0.6610 0.5565 0.6070 0.089 Uiso 1 calc . . GR
 C14 C -1.0348(3) 0.2599(3) 0.2692(3) 0.0682(14) Uani 1 d . . .
 H14A H -1.0975 0.2980 0.2436 0.102 Uiso 1 calc . . GR
 H14B H -1.0583 0.1991 0.2610 0.102 Uiso 1 calc . . GR
 H14C H -0.9834 0.2703 0.2340 0.102 Uiso 1 calc . . GR
 C15 C -1.0544(3) 0.2560(3) 0.4394(3) 0.0589(12) Uani 1 d . . .
 H15A H -1.0155 0.2644 0.5085 0.088 Uiso 1 calc . . GR
 H15B H -1.0770 0.1952 0.4277 0.088 Uiso 1 calc . . GR
 H15C H -1.1181 0.2937 0.4199 0.088 Uiso 1 calc . . GR
 C13 C -0.9792(3) 0.2794(3) 0.3795(3) 0.0471(10) Uani 1 d . . .
 H13 H -0.9137 0.2417 0.4028 0.056 Uiso 1 calc . . R
 C10 C -0.6729(3) 0.5121(2) 0.4681(3) 0.0427(10) Uani 1 d . . .
 H10 H -0.6304 0.4580 0.4922 0.051 Uiso 1 calc . . R
 B1 B -0.7233(3) 0.3088(3) 0.6378(3) 0.0295(9) Uani 1 d . . .
 O1 O -0.82248(15) 0.27741(14) 0.64180(15) 0.0246(5) Uani 1 d . . .
 H1 H -0.8222 0.2230 0.6407 0.037 Uiso 1 calc . . GR
 O2 O -0.63619(15) 0.27285(14) 0.71287(13) 0.0223(5) Uani 1 d . . .
 H2 H -0.6406 0.2186 0.7108 0.033 Uiso 1 calc . . GR
 O3 O -0.7203(2) 0.39959(14) 0.64963(14) 0.0314(6) Uani 1 d . . .
 H3 H -0.7087 0.4231 0.6021 0.047 Uiso 1 calc . . GR

loop_
  _atom_site_aniso_label
  _atom_site_aniso_U_11
  _atom_site_aniso_U_22
  _atom_site_aniso_U_33
  _atom_site_aniso_U_23
  _atom_site_aniso_U_13
  _atom_site_aniso_U_12
 N1 0.0260(15) 0.0282(16) 0.0206(14) -0.0002(12) 0.0029(11) 0.0035(12)
 N2 0.0249(14) 0.0270(16) 0.0247(14) 0.0015(12) 0.0047(11) 0.0048(12)
 C27 0.038(2) 0.059(3) 0.087(3) -0.006(3) 0.021(2) -0.007(2)
 C1 0.0177(15) 0.0245(18) 0.0277(18) 0.0002(15) 0.0022(13) -0.0059(14)
 C2 0.040(2) 0.032(2) 0.0263(18) 0.0000(16) 0.0099(15) 0.0061(17)
 C3 0.0350(19) 0.036(2) 0.0288(19) 0.0009(16) 0.0094(15) 0.0062(16)
 C17 0.0269(18) 0.032(2) 0.040(2) 0.0012(17) 0.0066(15) 0.0007(16)
 C16 0.0235(17) 0.0243(18) 0.0260(17) 0.0008(14) 0.0034(14) 0.0021(15)
 C18 0.036(2) 0.028(2) 0.052(2) 0.0035(18) 0.0090(18) -0.0028(17)
 C19 0.046(2) 0.024(2) 0.044(2) 0.0062(17) 0.0079(18) 0.0051(17)
 C20 0.0272(19) 0.036(2) 0.040(2) 0.0021(18) 0.0005(16) 0.0028(17)
 C21 0.0300(19) 0.030(2) 0.0280(18) 0.0026(15) 0.0042(15) 0.0007(16)
 C22 0.0277(19) 0.031(2) 0.042(2) 0.0059(17) 0.0014(15) -0.0016(16)
 C23 0.038(2) 0.059(3) 0.065(3) 0.001(2) 0.016(2) -0.007(2)
 C24 0.040(2) 0.045(3) 0.051(2) 0.002(2) -0.0065(18) -0.0105(19)
 C26 0.034(2) 0.093(4) 0.069(3) -0.004(3) 0.000(2) -0.013(2)
 C25 0.027(2) 0.036(2) 0.066(3) 0.0024(19) 0.0081(19) -0.0038(17)
 C4 0.0332(19) 0.029(2) 0.0225(17) 0.0010(15) 0.0039(14) 0.0094(16)
 C5 0.034(2) 0.041(2) 0.0310(19) -0.0016(16) 0.0027(16) 0.0118(17)
 C6 0.037(2) 0.056(3) 0.045(2) 0.003(2) 0.0025(18) 0.019(2)
 C7 0.062(3) 0.045(3) 0.053(3) 0.014(2) 0.018(2) 0.034(2)
 C8 0.058(3) 0.031(2) 0.047(2) 0.0085(18) 0.015(2) 0.015(2)
 C9 0.047(2) 0.032(2) 0.0255(19) 0.0052(16) 0.0097(16) 0.0056(18)
 C11 0.070(3) 0.050(3) 0.071(3) 0.006(2) 0.032(2) -0.010(2)
 C12 0.074(3) 0.042(3) 0.053(3) -0.004(2) 0.008(2) -0.004(2)
 C14 0.045(3) 0.081(4) 0.065(3) -0.029(3) 0.000(2) -0.002(2)
 C15 0.042(2) 0.057(3) 0.070(3) -0.005(2) 0.006(2) -0.006(2)
 C13 0.027(2) 0.046(3) 0.056(2) -0.010(2) -0.0034(17) 0.0061(18)
 C10 0.052(2) 0.029(2) 0.045(2) 0.0043(18) 0.0122(19) 0.0018(18)
 B1 0.033(2) 0.028(2) 0.026(2) 0.0047(17) 0.0079(17) 0.0047(18)
 O1 0.0166(11) 0.0348(13) 0.0246(11) -0.0014(11) 0.0097(9) -0.0023(10)
 O2 0.0196(11) 0.0327(13) 0.0114(10) 0.0024(10) 0.0004(8) 0.0082(10)
 O3 0.0661(16) 0.0153(12) 0.0156(11) -0.0025(9) 0.0168(11) -0.0010(11)

_geom_special_details
;
 All esds (except the esd in the dihedral angle between two l.s. planes) 
 are estimated using the full covariance matrix.  The cell esds are taken 
 into account individually in the estimation of esds in distances, angles 
 and torsion angles; correlations between esds in cell parameters are only 
 used when they are defined by crystal symmetry.  An approximate (isotropic) 
 treatment of cell esds is used for estimating esds involving l.s. planes. 
;
loop_
  _geom_bond_atom_site_label_1
  _geom_bond_atom_site_label_2
  _geom_bond_distance
  _geom_bond_site_symmetry_2
  _geom_bond_publ_flag
 N1 C1 1.316(4) . ?
 N1 C2 1.471(4) . ?
 N1 C4 1.444(4) . ?
 N2 C1 1.337(4) . ?
 N2 C3 1.478(4) . ?
 N2 C16 1.446(4) . ?
 C27 H27A 0.9600 . ?
 C27 H27B 0.9600 . ?
 C27 H27C 0.9600 . ?
 C27 C25 1.514(5) . ?
 C1 B1 1.650(5) . ?
 C2 H2A 0.9700 . ?
 C2 H2B 0.9700 . ?
 C2 C3 1.516(4) . ?
 C3 H3A 0.9700 . ?
 C3 H3B 0.9700 . ?
 C17 C16 1.396(4) . ?
 C17 C18 1.391(5) . ?
 C17 C25 1.515(5) . ?
 C16 C21 1.397(4) . ?
 C18 H18 0.9300 . ?
 C18 C19 1.367(5) . ?
 C19 H19 0.9300 . ?
 C19 C20 1.376(5) . ?
 C20 H20 0.9300 . ?
 C20 C21 1.394(5) . ?
 C21 C22 1.508(5) . ?
 C22 H22 0.9800 . ?
 C22 C23 1.520(5) . ?
 C22 C24 1.533(5) . ?
 C23 H23A 0.9600 . ?
 C23 H23B 0.9600 . ?
 C23 H23C 0.9600 . ?
 C24 H24A 0.9600 . ?
 C24 H24B 0.9600 . ?
 C24 H24C 0.9600 . ?
 C26 H26A 0.9600 . ?
 C26 H26B 0.9600 . ?
 C26 H26C 0.9600 . ?
 C26 C25 1.509(6) . ?
 C25 H25 0.9800 . ?
 C4 C5 1.414(5) . ?
 C4 C9 1.395(5) . ?
 C5 C6 1.384(5) . ?
 C5 C13 1.529(5) . ?
 C6 H6 0.9300 . ?
 C6 C7 1.373(6) . ?
 C7 H7 0.9300 . ?
 C7 C8 1.368(6) . ?
 C8 H8 0.9300 . ?
 C8 C9 1.392(5) . ?
 C9 C10 1.512(5) . ?
 C11 H11A 0.9600 . ?
 C11 H11B 0.9600 . ?
 C11 H11C 0.9600 . ?
 C11 C10 1.520(5) . ?
 C12 H12A 0.9600 . ?
 C12 H12B 0.9600 . ?
 C12 H12C 0.9600 . ?
 C12 C10 1.521(5) . ?
 C14 H14A 0.9600 . ?
 C14 H14B 0.9600 . ?
 C14 H14C 0.9600 . ?
 C14 C13 1.533(5) . ?
 C15 H15A 0.9600 . ?
 C15 H15B 0.9600 . ?
 C15 H15C 0.9600 . ?
 C15 C13 1.519(5) . ?
 C13 H13 0.9800 . ?
 C10 H10 0.9800 . ?
 B1 O1 1.375(4) . ?
 B1 O2 1.386(4) . ?
 B1 O3 1.379(4) . ?
 O1 H1 0.8200 . ?
 O2 H2 0.8200 . ?
 O3 H3 0.8200 . ?

loop_
  _geom_angle_atom_site_label_1
  _geom_angle_atom_site_label_2
  _geom_angle_atom_site_label_3
  _geom_angle
  _geom_angle_site_symmetry_1
  _geom_angle_site_symmetry_3
  _geom_angle_publ_flag
 C1 N1 C2 113.2(3) . . ?
 C1 N1 C4 127.2(3) . . ?
 C4 N1 C2 119.2(2) . . ?
 C1 N2 C3 111.8(2) . . ?
 C1 N2 C16 128.9(3) . . ?
 C16 N2 C3 117.8(2) . . ?
 H27A C27 H27B 109.5 . . ?
 H27A C27 H27C 109.5 . . ?
 H27B C27 H27C 109.5 . . ?
 C25 C27 H27A 109.5 . . ?
 C25 C27 H27B 109.5 . . ?
 C25 C27 H27C 109.5 . . ?
 N1 C1 N2 109.5(3) . . ?
 N1 C1 B1 125.4(3) . . ?
 N2 C1 B1 125.0(3) . . ?
 N1 C2 H2A 111.3 . . ?
 N1 C2 H2B 111.3 . . ?
 N1 C2 C3 102.4(2) . . ?
 H2A C2 H2B 109.2 . . ?
 C3 C2 H2A 111.3 . . ?
 C3 C2 H2B 111.3 . . ?
 N2 C3 C2 103.1(2) . . ?
 N2 C3 H3A 111.1 . . ?
 N2 C3 H3B 111.1 . . ?
 C2 C3 H3A 111.1 . . ?
 C2 C3 H3B 111.1 . . ?
 H3A C3 H3B 109.1 . . ?
 C16 C17 C25 122.7(3) . . ?
 C18 C17 C16 117.5(3) . . ?
 C18 C17 C25 119.8(3) . . ?
 C17 C16 N2 119.1(3) . . ?
 C17 C16 C21 122.0(3) . . ?
 C21 C16 N2 118.5(3) . . ?
 C17 C18 H18 119.2 . . ?
 C19 C18 C17 121.6(3) . . ?
 C19 C18 H18 119.2 . . ?
 C18 C19 H19 120.0 . . ?
 C18 C19 C20 120.1(3) . . ?
 C20 C19 H19 120.0 . . ?
 C19 C20 H20 119.5 . . ?
 C19 C20 C21 121.0(3) . . ?
 C21 C20 H20 119.5 . . ?
 C16 C21 C22 122.8(3) . . ?
 C20 C21 C16 117.7(3) . . ?
 C20 C21 C22 119.5(3) . . ?
 C21 C22 H22 107.7 . . ?
 C21 C22 C23 112.1(3) . . ?
 C21 C22 C24 110.1(3) . . ?
 C23 C22 H22 107.7 . . ?
 C23 C22 C24 111.3(3) . . ?
 C24 C22 H22 107.7 . . ?
 C22 C23 H23A 109.5 . . ?
 C22 C23 H23B 109.5 . . ?
 C22 C23 H23C 109.5 . . ?
 H23A C23 H23B 109.5 . . ?
 H23A C23 H23C 109.5 . . ?
 H23B C23 H23C 109.5 . . ?
 C22 C24 H24A 109.5 . . ?
 C22 C24 H24B 109.5 . . ?
 C22 C24 H24C 109.5 . . ?
 H24A C24 H24B 109.5 . . ?
 H24A C24 H24C 109.5 . . ?
 H24B C24 H24C 109.5 . . ?
 H26A C26 H26B 109.5 . . ?
 H26A C26 H26C 109.5 . . ?
 H26B C26 H26C 109.5 . . ?
 C25 C26 H26A 109.5 . . ?
 C25 C26 H26B 109.5 . . ?
 C25 C26 H26C 109.5 . . ?
 C27 C25 C17 112.0(3) . . ?
 C27 C25 H25 107.0 . . ?
 C17 C25 H25 107.0 . . ?
 C26 C25 C27 111.7(3) . . ?
 C26 C25 C17 111.9(3) . . ?
 C26 C25 H25 107.0 . . ?
 C5 C4 N1 118.3(3) . . ?
 C9 C4 N1 119.5(3) . . ?
 C9 C4 C5 122.0(3) . . ?
 C4 C5 C13 122.0(3) . . ?
 C6 C5 C4 117.4(3) . . ?
 C6 C5 C13 120.5(3) . . ?
 C5 C6 H6 119.2 . . ?
 C7 C6 C5 121.5(4) . . ?
 C7 C6 H6 119.2 . . ?
 C6 C7 H7 120.0 . . ?
 C8 C7 C6 120.0(4) . . ?
 C8 C7 H7 120.0 . . ?
 C7 C8 H8 119.0 . . ?
 C7 C8 C9 122.0(4) . . ?
 C9 C8 H8 119.0 . . ?
 C4 C9 C10 122.0(3) . . ?
 C8 C9 C4 117.2(3) . . ?
 C8 C9 C10 120.8(3) . . ?
 H11A C11 H11B 109.5 . . ?
 H11A C11 H11C 109.5 . . ?
 H11B C11 H11C 109.5 . . ?
 C10 C11 H11A 109.5 . . ?
 C10 C11 H11B 109.5 . . ?
 C10 C11 H11C 109.5 . . ?
 H12A C12 H12B 109.5 . . ?
 H12A C12 H12C 109.5 . . ?
 H12B C12 H12C 109.5 . . ?
 C10 C12 H12A 109.5 . . ?
 C10 C12 H12B 109.5 . . ?
 C10 C12 H12C 109.5 . . ?
 H14A C14 H14B 109.5 . . ?
 H14A C14 H14C 109.5 . . ?
 H14B C14 H14C 109.5 . . ?
 C13 C14 H14A 109.5 . . ?
 C13 C14 H14B 109.5 . . ?
 C13 C14 H14C 109.5 . . ?
 H15A C15 H15B 109.5 . . ?
 H15A C15 H15C 109.5 . . ?
 H15B C15 H15C 109.5 . . ?
 C13 C15 H15A 109.5 . . ?
 C13 C15 H15B 109.5 . . ?
 C13 C15 H15C 109.5 . . ?
 C5 C13 C14 110.3(3) . . ?
 C5 C13 H13 107.7 . . ?
 C14 C13 H13 107.7 . . ?
 C15 C13 C5 112.0(3) . . ?
 C15 C13 C14 111.3(3) . . ?
 C15 C13 H13 107.7 . . ?
 C9 C10 C11 110.3(3) . . ?
 C9 C10 C12 112.7(3) . . ?
 C9 C10 H10 107.4 . . ?
 C11 C10 C12 111.5(3) . . ?
 C11 C10 H10 107.4 . . ?
 C12 C10 H10 107.4 . . ?
 O1 B1 C1 110.4(3) . . ?
 O1 B1 O2 111.1(3) . . ?
 O1 B1 O3 109.1(3) . . ?
 O2 B1 C1 108.5(3) . . ?
 O3 B1 C1 109.6(3) . . ?
 O3 B1 O2 108.1(3) . . ?
 B1 O1 H1 109.5 . . ?
 B1 O2 H2 109.5 . . ?
 B1 O3 H3 109.5 . . ?

loop_
  _geom_torsion_atom_site_label_1
  _geom_torsion_atom_site_label_2
  _geom_torsion_atom_site_label_3
  _geom_torsion_atom_site_label_4
  _geom_torsion
  _geom_torsion_site_symmetry_1
  _geom_torsion_site_symmetry_2
  _geom_torsion_site_symmetry_3
  _geom_torsion_site_symmetry_4
  _geom_torsion_publ_flag
 N1 C1 B1 O1 83.3(4) . . . . ?
 N1 C1 B1 O2 -154.7(3) . . . . ?
 N1 C1 B1 O3 -36.9(4) . . . . ?
 N1 C2 C3 N2 -1.2(3) . . . . ?
 N1 C4 C5 C6 -176.4(3) . . . . ?
 N1 C4 C5 C13 1.3(5) . . . . ?
 N1 C4 C9 C8 176.3(3) . . . . ?
 N1 C4 C9 C10 -1.4(5) . . . . ?
 N2 C1 B1 O1 -100.8(3) . . . . ?
 N2 C1 B1 O2 21.2(4) . . . . ?
 N2 C1 B1 O3 139.1(3) . . . . ?
 N2 C16 C21 C20 -170.5(3) . . . . ?
 N2 C16 C21 C22 11.4(5) . . . . ?
 C1 N1 C2 C3 1.4(3) . . . . ?
 C1 N1 C4 C5 -86.7(4) . . . . ?
 C1 N1 C4 C9 98.1(4) . . . . ?
 C1 N2 C3 C2 0.8(3) . . . . ?
 C1 N2 C16 C17 75.1(4) . . . . ?
 C1 N2 C16 C21 -111.6(4) . . . . ?
 C2 N1 C1 N2 -1.0(4) . . . . ?
 C2 N1 C1 B1 175.5(3) . . . . ?
 C2 N1 C4 C5 85.7(4) . . . . ?
 C2 N1 C4 C9 -89.5(4) . . . . ?
 C3 N2 C1 N1 0.1(4) . . . . ?
 C3 N2 C1 B1 -176.4(3) . . . . ?
 C3 N2 C16 C17 -89.3(4) . . . . ?
 C3 N2 C16 C21 84.0(4) . . . . ?
 C17 C16 C21 C20 2.6(5) . . . . ?
 C17 C16 C21 C22 -175.5(3) . . . . ?
 C17 C18 C19 C20 1.2(6) . . . . ?
 C16 N2 C1 N1 -165.1(3) . . . . ?
 C16 N2 C1 B1 18.5(5) . . . . ?
 C16 N2 C3 C2 167.7(3) . . . . ?
 C16 C17 C18 C19 0.5(5) . . . . ?
 C16 C17 C25 C27 -127.3(4) . . . . ?
 C16 C17 C25 C26 106.4(4) . . . . ?
 C16 C21 C22 C23 -119.0(4) . . . . ?
 C16 C21 C22 C24 116.6(3) . . . . ?
 C18 C17 C16 N2 170.6(3) . . . . ?
 C18 C17 C16 C21 -2.4(5) . . . . ?
 C18 C17 C25 C27 53.2(5) . . . . ?
 C18 C17 C25 C26 -73.1(5) . . . . ?
 C18 C19 C20 C21 -1.1(5) . . . . ?
 C19 C20 C21 C16 -0.8(5) . . . . ?
 C19 C20 C21 C22 177.3(3) . . . . ?
 C20 C21 C22 C23 63.0(4) . . . . ?
 C20 C21 C22 C24 -61.4(4) . . . . ?
 C25 C17 C16 N2 -8.9(5) . . . . ?
 C25 C17 C16 C21 178.0(3) . . . . ?
 C25 C17 C18 C19 -179.9(3) . . . . ?
 C4 N1 C1 N2 171.7(3) . . . . ?
 C4 N1 C1 B1 -11.8(5) . . . . ?
 C4 N1 C2 C3 -172.0(3) . . . . ?
 C4 C5 C6 C7 0.4(5) . . . . ?
 C4 C5 C13 C14 -112.7(4) . . . . ?
 C4 C5 C13 C15 122.8(4) . . . . ?
 C4 C9 C10 C11 105.6(4) . . . . ?
 C4 C9 C10 C12 -129.1(4) . . . . ?
 C5 C4 C9 C8 1.2(5) . . . . ?
 C5 C4 C9 C10 -176.4(3) . . . . ?
 C5 C6 C7 C8 0.5(6) . . . . ?
 C6 C5 C13 C14 64.9(4) . . . . ?
 C6 C5 C13 C15 -59.6(4) . . . . ?
 C6 C7 C8 C9 -0.6(6) . . . . ?
 C7 C8 C9 C4 -0.3(5) . . . . ?
 C7 C8 C9 C10 177.4(3) . . . . ?
 C8 C9 C10 C11 -72.0(4) . . . . ?
 C8 C9 C10 C12 53.3(4) . . . . ?
 C9 C4 C5 C6 -1.3(5) . . . . ?
 C9 C4 C5 C13 176.4(3) . . . . ?
 C13 C5 C6 C7 -177.3(3) . . . . ?

loop_
  _refln_index_h
  _refln_index_k
  _refln_index_l
  _refln_F_squared_meas
  _refln_F_squared_sigma
 -2 0 0 1367.46 89.49
 -2 0 0 1340.37 89.19
 -2 0 0 1415.66 89.29
 -2 0 0 1570.24 89.29
 -2 0 0 1351.16 88.99
 -2 0 0 1281.47 89.09
 -2 0 0 1553.34 89.39
 2 0 0 1320.07 89.49
 2 0 0 1405.26 89.19
 2 0 0 1426.96 88.69
 2 0 0 1338.47 88.99
 2 0 0 1331.97 88.79
 2 0 0 1379.16 88.99
 2 0 0 1507.95 89.29
 2 0 0 1424.36 89.39
 -3 0 0 7551.54 481.25
 -3 0 0 7312.37 479.75
 -3 0 0 8182.78 480.95
 -3 0 0 7044.69 480.55
 -3 0 0 7302.57 480.75
 -3 0 0 7256.37 481.75
 -3 0 0 7970.7 480.95
 -3 0 0 7586.04 480.85
 3 0 0 8189.48 480.75
 3 0 0 7672.53 480.75
 3 0 0 7896.41 481.05
 3 0 0 7555.84 481.35
 3 0 0 7641.84 480.45
 3 0 0 7363.86 480.45
 3 0 0 7680.63 480.85
 3 0 0 7507.45 480.25
 3 0 0 8180.38 480.65
 -4 0 0 707.93 48.6
 -4 0 0 760.22 50.59
 -4 0 0 742.83 48.7
 -4 0 0 734.33 51.29
 -4 0 0 738.93 50.19
 -4 0 0 829.12 50.69
 -4 0 0 766.92 49.9
 -4 0 0 691.73 50.09
 4 0 0 798.82 50.09
 4 0 0 746.73 49.9
 4 0 0 739.23 50.69
 4 0 0 745.53 49.5
 4 0 0 686.93 51.19
 4 0 0 750.22 49.8
 4 0 0 767.62 50.49
 4 0 0 759.22 50.29
 4 0 0 792.62 49.2
 -5 0 0 92.49 14.2
 -5 0 0 65.79 8.9
 -5 0 0 73.29 11.1
 -5 0 0 54.29 11.1
 -5 0 0 71.49 11.9
 5 0 0 104.29 14.2
 5 0 0 84.99 11.7
 5 0 0 72.69 10.2
 5 0 0 75.79 12.3
 5 0 0 78.29 13.5
 5 0 0 82.49 11.2
 5 0 0 87.09 10.8
 5 0 0 91.49 11.8
 5 0 0 77.59 10.7
 -6 0 0 3525.55 217.08
 -6 0 0 3428.46 216.88
 -6 0 0 3341.77 214.48
 -6 0 0 3140.79 217.38
 -6 0 0 3684.03 216.18
 -6 0 0 3448.25 216.98
 -6 0 0 3415.66 216.78
 6 0 0 2982.8 218.08
 6 0 0 3683.73 216.58
 6 0 0 3255.47 216.38
 6 0 0 3556.14 215.18
 6 0 0 3338.17 217.18
 6 0 0 3288.47 215.28
 6 0 0 3328.57 217.88
 6 0 0 3377.86 215.98
 6 0 0 3363.86 216.48
 -7 0 0 110.89 18.8
 -7 0 0 134.89 18.7
 -7 0 0 141.09 18.6
 -7 0 0 131.29 13.7
 -7 0 0 113.39 18.8
 -7 0 0 149.29 19.1
 -7 0 0 123.19 17.1
 7 0 0 138.59 28.9
 7 0 0 101.99 15.6
 7 0 0 157.78 18.4
 7 0 0 108.59 15.9
 7 0 0 126.39 15.1
 7 0 0 168.98 19
 7 0 0 130.49 16.5
 7 0 0 119.29 17.6
 7 0 0 137.39 21.8
 -8 0 0 37.6 14.8
 -8 0 0 23.3 18.7
 -8 0 0 28.9 9.5
 -8 0 0 6 13.1
 -8 0 0 37.9 13.6
 -8 0 0 25.5 12.8
 -8 0 0 25.9 17.2
 8 0 0 11.8 13.3
 8 0 0 31.9 11.9
 8 0 0 16.1 12.9
 8 0 0 28.9 14.2
 8 0 0 5 14.6
 8 0 0 11.2 17.5
 8 0 0 5.7 13.3
 8 0 0 54.59 13.5
 8 0 0 29.6 12.2
 -9 0 0 243.58 29.3
 -9 0 0 212.78 28.3
 -9 0 0 212.58 30.2
 -9 0 0 256.47 22.1
 9 0 0 211.38 31.5
 9 0 0 210.58 26.1
 9 0 0 189.78 27.9
 9 0 0 209.78 26.3
 9 0 0 179.08 24.6
 9 0 0 238.88 27.6
 9 0 0 212.68 31.4
 9 0 0 199.48 25.3
 9 0 0 245.28 28
 -10 0 0 124.29 23.4
 -10 0 0 102.29 16.5
 -10 0 0 132.99 25.8
 -10 0 0 130.39 23.3
 -10 0 0 78.69 22.2
 10 0 0 110.19 32
 10 0 0 121.59 20.1
 10 0 0 79.59 22
 10 0 0 78.89 21.2
 10 0 0 112.89 25.7
 10 0 0 111.89 22.3
 -11 0 0 174.28 28.6
 -11 0 0 171.08 21.1
 -11 0 0 210.08 34.7
 -11 0 0 115.39 29.7
 -11 0 0 148.09 27.7
 11 0 0 197.18 27.3
 11 0 0 173.18 27.4
 11 0 0 192.18 35.5
 11 0 0 185.88 29.7
 11 0 0 209.48 38.7
 -12 0 0 30.9 24.1
 -12 0 0 45.4 30.9
 -12 0 0 -13.8 16
 -12 0 0 35.7 26.5
 -12 0 0 5 25.5
 12 0 0 9.7 31.1
 12 0 0 70.69 41.7
 12 0 0 53.89 25.8
 12 0 0 10.6 23.2
 12 0 0 -6.9 27
 -13 0 0 64.19 33.5
 -13 0 0 76.09 20.7
 -13 0 0 38.4 37.7
 13 0 0 -3.6 36.3
 13 0 0 54.79 36.1
 13 0 0 105.59 29.2
 13 0 0 89.99 33.8
 -14 0 0 30.7 38.1
 -14 0 0 5.2 36.3
 14 0 0 44.1 33.3
 14 0 0 21.5 38.8
 14 0 0 -11.6 39
 14 0 0 54.29 36.1
 -15 0 0 12.1 44.5
 15 0 0 -8.7 45.1
 15 0 0 -46.9 37.9
 15 0 0 8.3 66.49
 15 0 0 -19.7 49.2
 -16 0 0 -28.9 51.99
 16 0 0 -54.39 56.79
 16 0 0 55.39 53.59
 16 0 0 -108.29 61.79
 15 -1 0 -29.2 50.99
 15 -1 0 10.9 44.7
 15 -1 0 16 49.2
 14 -1 0 -48.8 40.9
 14 -1 0 -30.5 31.1
 14 -1 0 8.9 37.1
 14 -1 0 -40.9 41.5
 -14 1 0 -28.5 37
 13 -1 0 -94.89 34.3
 13 -1 0 -52.59 38.2
 13 -1 0 11.1 28
 13 -1 0 50.19 31.7
 -13 1 0 -22.3 30.3
 -13 1 0 67.09 33.1
 12 -1 0 12.8 25.1
 12 -1 0 -0.4 41.6
 12 -1 0 81.89 50.09
 12 -1 0 -4.6 32.5
 12 -1 0 38.4 23.8
 -12 1 0 31.9 41.1
 -12 1 0 39.9 27.5
 -12 1 0 -0.7 25.2
 11 -1 0 2.4 18.1
 11 -1 0 -0.9 25.2
 11 -1 0 44.3 37
 11 -1 0 0.9 22.3
 11 -1 0 -6.2 21.1
 -11 1 0 2.4 22.6
 -11 1 0 30.6 21.7
 -11 1 0 -22.1 25.9
 -11 1 0 47.7 20.2
 10 -1 0 2.6 16.7
 10 -1 0 3.7 16.7
 10 -1 0 -6.5 18.4
 10 -1 0 11.6 21.3
 10 -1 0 -13.2 17.6
 10 -1 0 46.2 30.1
 -10 1 0 2.1 32
 -10 1 0 4.8 17.2
 -10 1 0 17.3 22.5
 -10 1 0 16.5 18
 9 -1 0 5.9 14.8
 9 -1 0 2.6 13.8
 9 -1 0 2.2 17.2
 9 -1 0 25.4 19.6
 9 -1 0 -3 18.9
 9 -1 0 49.8 30.7
 9 -1 0 -13.2 14.3
 9 -1 0 -23.4 18.6
 9 -1 0 -19.7 24.5
 -9 1 0 2.3 18.6
 -9 1 0 12.2 9.1
 -9 1 0 -33.7 13.9
 -9 1 0 5.5 14.5
 -9 1 0 28.4 15.6
 8 -1 0 14.7 13.1
 8 -1 0 -0.8 11
 8 -1 0 11.8 12.1
 8 -1 0 -7.8 13.2
 8 -1 0 1.4 11.4
 8 -1 0 8.1 12.8
 8 -1 0 -8.5 18.6
 8 -1 0 12.3 14.9
 8 -1 0 15.3 17.1
 -8 1 0 -19.5 11.2
 -8 1 0 42.8 18.8
 -8 1 0 6.9 7.5
 -8 1 0 13.7 13.4
 -8 1 0 -0.9 13
 -8 1 0 14.1 14.4
 -8 1 0 18.6 18.1
 7 -1 0 6.7 10.9
 7 -1 0 4.3 14.6
 7 -1 0 -0.8 10.2
 7 -1 0 0.8 10.9
 7 -1 0 10.4 10.1
 7 -1 0 -0.9 11.4
 7 -1 0 4.1 8.4
 7 -1 0 -3.9 15.3
 -7 1 0 -18.5 10.2
 -7 1 0 15.7 13.7
 -7 1 0 13.9 10.8
 -7 1 0 -6 10.8
 -7 1 0 -1.1 14
 -7 1 0 -11.4 8.8
 -7 1 0 -1.4 6.3
 6 -1 0 -1.5 6.9
 6 -1 0 18.3 8
 6 -1 0 5.4 8.6
 6 -1 0 5 9.1
 6 -1 0 -7 7.7
 6 -1 0 -1.2 8
 6 -1 0 1 9.4
 6 -1 0 -8.3 11.7
 -6 1 0 -20.4 10.5
 -6 1 0 0.4 5.3
 -6 1 0 2 8.4
 -6 1 0 6.8 10.3
 -6 1 0 18.1 11
 -6 1 0 -1.6 10.2
 -6 1 0 14.1 12
 5 -1 0 -8.1 7.4
 5 -1 0 4.7 6.4
 5 -1 0 0.7 6.3
 5 -1 0 5.4 8.9
 5 -1 0 1.9 7.2
 5 -1 0 7.4 8.5
 5 -1 0 -4.8 5.2
 5 -1 0 5.7 6.8
 5 -1 0 -3 9.1
 -5 1 0 -8.5 8.8
 -5 1 0 -1.3 7.6
 -5 1 0 -4.7 6.8
 -5 1 0 -9.3 8
 -5 1 0 10.7 4.6
 -5 1 0 -8.8 6.8
 4 -1 0 -10 7
 4 -1 0 -5 5.2
 4 -1 0 -5.4 5.7
 4 -1 0 -9.3 7
 4 -1 0 2.6 4
 4 -1 0 -1.8 5.8
 4 -1 0 0.2 4.9
 4 -1 0 4.6 4.8
 4 -1 0 1.2 5.1
 -4 1 0 0.6 3.3
 -4 1 0 -0.1 4.7
 -4 1 0 -5.6 7.3
 -4 1 0 -10.7 5.5
 -4 1 0 -8.3 8.6
 -4 1 0 -5 5.5
 -4 1 0 2.9 6.8
 3 -1 0 5.8 3.8
 3 -1 0 -1.6 2.9
 3 -1 0 1.2 3.9
 3 -1 0 -2.3 4.1
 3 -1 0 -8.5 5.2
 3 -1 0 -3.2 5.6
 3 -1 0 1.3 4.1
 -3 1 0 0 3.1
 -3 1 0 -8 4.4
 -3 1 0 -1.5 4.2
 -3 1 0 2.7 4.7
 -3 1 0 3.7 2.7
 -3 1 0 -0.2 4.7
 -3 1 0 9.2 3.9
 2 -1 0 3.5 3.4
 2 -1 0 -3.2 2.7
 2 -1 0 0.4 2.4
 2 -1 0 -1.3 1.7
 2 -1 0 -1.9 3.8
 2 -1 0 1.4 4.9
 2 -1 0 0.8 2.7
 2 -1 0 1.2 3.2
 -2 1 0 -3.2 2.5
 -2 1 0 -1.8 1.4
 -2 1 0 2.7 3
 -2 1 0 1 2.7
 -2 1 0 -2.4 3.3
 -2 1 0 -4.5 4.1
 -2 1 0 2.8 2.5
 -2 1 0 4.5 3.7
 1 -1 0 1.2 1.5
 1 -1 0 -0.9 2.2
 1 -1 0 0.8 1.6
 1 -1 0 -2.4 1.9
 1 -1 0 0.3 1.7
 1 -1 0 2.6 2.8
 1 -1 0 -1.4 1.2
 -1 1 0 -0.2 1.3
 -1 1 0 -0.7 1.8
 -1 1 0 0 1.6
 -1 1 0 -0.9 1.3
 -1 1 0 3.3 2
 -2 -1 0 3.2 2.8
 -2 -1 0 2.2 2.4
 -2 -1 0 0.6 2.6
 -2 -1 0 0.4 2.9
 -2 -1 0 0.4 2.3
 -2 -1 0 -4.1 2.5
 -2 -1 0 1.5 2.1
 2 1 0 3.1 2.8
 2 1 0 1.1 2.2
 2 1 0 -0.4 1.9
 2 1 0 0.2 2.4
 2 1 0 5 3.3
 2 1 0 1.8 2
 2 1 0 -2 2.2
 2 1 0 -1.4 2.9
 2 1 0 5.1 3.3
 -3 -1 0 -8.8 3.5
 -3 -1 0 8.2 5.7
 -3 -1 0 -0.8 4.3
 -3 -1 0 1.9 3.7
 -3 -1 0 -1.4 3.4
 -3 -1 0 -3.7 3.9
 -3 -1 0 -5.2 4.2
 -3 -1 0 0.2 4.2
 3 1 0 2.7 4
 3 1 0 -3.4 4.3
 3 1 0 3.2 3.2
 3 1 0 0.3 4.1
 3 1 0 -0.5 3.3
 3 1 0 -2.9 3.7
 3 1 0 -0.4 3.1
 3 1 0 6.8 4.6
 3 1 0 5.6 5.3
 -4 -1 0 -0.6 4.3
 -4 -1 0 -1.1 5.8
 -4 -1 0 -1.1 5.1
 -4 -1 0 7.5 5.9
 -4 -1 0 8.9 6.8
 -4 -1 0 2 5
 -4 -1 0 2.7 3.5
 -4 -1 0 1.9 4.8
 -4 -1 0 -4.1 6.3
 4 1 0 -0.7 5.1
 4 1 0 2.7 4.9
 4 1 0 -6.4 6.3
 4 1 0 -2.4 4.9
 4 1 0 7.5 4.8
 4 1 0 1 4.4
 4 1 0 2.6 5.5
 4 1 0 -0.3 5.9
 4 1 0 -2.4 4.4
 -5 -1 0 0.7 6.9
 -5 -1 0 1.2 4.8
 -5 -1 0 -8.7 6.9
 -5 -1 0 -2.3 8
 -5 -1 0 -2.4 8.3
 -5 -1 0 -1.1 5.8
 -5 -1 0 -15.1 6.9
 5 1 0 -1.1 5.8
 5 1 0 -5.6 7.6
 5 1 0 2.7 6.2
 5 1 0 -0.3 7.8
 5 1 0 1.3 8.2
 5 1 0 -3.6 5.2
 5 1 0 3 5.8
 5 1 0 0.9 6.5
 5 1 0 -0.2 5.9
 -6 -1 0 20 11.3
 -6 -1 0 2.9 5.6
 -6 -1 0 7.4 8.8
 -6 -1 0 6.5 7.9
 -6 -1 0 -0.1 9.9
 -6 -1 0 -12.2 8
 -6 -1 0 -7.2 8.4
 6 1 0 5.9 9.3
 6 1 0 10.4 8.5
 6 1 0 -3.4 7.3
 6 1 0 1.5 19.3
 6 1 0 -8.8 7
 6 1 0 -3.6 6.4
 6 1 0 12.8 7.3
 6 1 0 5.9 9.2
 -7 -1 0 7.7 11.1
 -7 -1 0 10.7 14.3
 -7 -1 0 -13.6 10.4
 -7 -1 0 4.3 8.7
 -7 -1 0 -1.2 11.9
 -7 -1 0 18 11.2
 -7 -1 0 7.6 7.2
 7 1 0 10.4 10.1
 7 1 0 2.9 8.2
 7 1 0 3.8 11.9
 7 1 0 8.6 11.1
 7 1 0 8.8 9.6
 7 1 0 5.1 8.9
 7 1 0 -8.8 13.4
 7 1 0 -0.5 8.7
 7 1 0 -6.5 9.5
 -8 -1 0 -2.6 10.5
 -8 -1 0 -4.6 15.3
 -8 -1 0 22.8 14
 -8 -1 0 19.6 17
 -8 -1 0 -7.5 9.1
 -8 -1 0 -5.9 12.2
 8 1 0 -12 11.6
 8 1 0 29.9 17.7
 8 1 0 -1.8 10.1
 8 1 0 -3.4 12.7
 8 1 0 13.7 12
 8 1 0 19.3 10.5
 8 1 0 17.8 12.6
 8 1 0 7 12.5
 8 1 0 14.3 15.8
 -9 -1 0 -4.9 14.6
 -9 -1 0 -4.4 14.6
 -9 -1 0 25.2 16.7
 -9 -1 0 -6.1 13.5
 -9 -1 0 23.8 10.5
 9 1 0 -8.2 14
 9 1 0 -6.7 15.5
 9 1 0 18.5 14.5
 9 1 0 19.5 14
 9 1 0 52.29 21.7
 9 1 0 8.4 13.6
 9 1 0 -9.8 14.4
 9 1 0 1 17.4
 -10 -1 0 10 17.1
 -10 -1 0 12.5 19.1
 -10 -1 0 6.9 12.8
 -10 -1 0 20.5 20.6
 -10 -1 0 -26.5 17.5
 10 1 0 9 15.5
 10 1 0 29.7 25.9
 10 1 0 -6.2 19.2
 10 1 0 -1.5 18.8
 10 1 0 -3.1 16.5
 10 1 0 -11.8 16.5
 -11 -1 0 -26.8 13.4
 -11 -1 0 3.3 22.3
 -11 -1 0 13.2 23.5
 -11 -1 0 -22.3 19.6
 11 1 0 -27.6 21.1
 11 1 0 -13.9 19.4
 11 1 0 3.5 31.3
 11 1 0 -2.1 18.5
 11 1 0 -36.5 19
 -12 -1 0 -10.8 26.9
 -12 -1 0 9.8 17
 -12 -1 0 39.1 25.5
 -12 -1 0 -18.9 23.8
 12 1 0 -9.6 25.5
 12 1 0 19.8 22.1
 12 1 0 -43.6 41.6
 12 1 0 10.7 25.3
 12 1 0 7.7 25.3
 -13 -1 0 0.3 20.3
 -13 -1 0 -16.4 29.9
 -13 -1 0 10.8 30.1
 13 1 0 -28.1 26.8
 13 1 0 -46.7 34.2
 13 1 0 -36 27.9
 13 1 0 -29 25.8
 -14 -1 0 -29.4 36.4
 -14 -1 0 -5 23.3
 -14 -1 0 -41.9 33.5
 14 1 0 -35.3 30.5
 14 1 0 -32.7 38.2
 14 1 0 -0.7 36.6
 14 1 0 -10.9 33.6
 -15 -1 0 -48.4 39.9
 15 1 0 -42.1 38
 15 1 0 -48.7 49.99
 15 1 0 -11.1 49.1
 15 1 0 29.5 42.9
 -16 -1 0 -91.19 49.1
 16 1 0 -13.2 50.29
 16 1 0 72.19 61.89
 16 1 0 20.4 58.89
 16 1 0 -45.5 54.79
 15 -2 0 63.49 55.09
 15 -2 0 10.6 47.1
 15 -2 0 111.29 54.79
 -15 2 0 -67.79 46.7
 14 -2 0 51.89 39.5
 14 -2 0 39.2 49.99
 14 -2 0 -37.2 41.7
 14 -2 0 65.89 33.5
 -14 2 0 73.09 55.19
 -14 2 0 -54.49 37.9
 13 -2 0 24.5 38
 13 -2 0 -13.7 37.6
 13 -2 0 39.5 29
 13 -2 0 31.3 31
 -13 2 0 14.2 44
 -13 2 0 21.4 34.5
 12 -2 0 22.6 33.3
 12 -2 0 -37.2 22.1
 12 -2 0 -12.4 28.4
 12 -2 0 2.9 26.5
 -12 2 0 -42.5 33.4
 -12 2 0 -16.9 26.7
 -12 2 0 -12.8 27.2
 11 -2 0 123.99 27
 11 -2 0 119.99 33.7
 11 -2 0 165.18 29.2
 11 -2 0 140.69 26
 -11 2 0 161.38 35.3
 -11 2 0 97.19 37.1
 -11 2 0 185.98 29.8
 10 -2 0 146.59 24.8
 10 -2 0 157.88 32.9
 10 -2 0 142.39 22.9
 10 -2 0 98.39 34.9
 10 -2 0 113.89 23.7
 10 -2 0 67.79 21.8
 -10 2 0 130.59 25.5
 -10 2 0 143.39 31.2
 -10 2 0 205.28 28.2
 9 -2 0 -0.5 14.9
 9 -2 0 6 15.2
 9 -2 0 -7.8 14.2
 9 -2 0 4.2 15.9
 9 -2 0 6.2 24.1
 9 -2 0 17.7 15.1
 9 -2 0 6.8 20.3
 9 -2 0 -6.8 21.7
 -9 2 0 11.2 16.4
 -9 2 0 -23.8 18.5
 -9 2 0 -14.7 15.8
 8 -2 0 194.98 28.1
 8 -2 0 212.28 24.1
 8 -2 0 219.18 28.4
 8 -2 0 193.88 37.4
 8 -2 0 215.08 22.9
 8 -2 0 217.78 24
 8 -2 0 189.58 25.1
 8 -2 0 241.48 29.4
 8 -2 0 218.38 25.5
 -8 2 0 183.68 30
 -8 2 0 264.47 30
 -8 2 0 203.38 23.2
 -8 2 0 206.98 25.9
 -8 2 0 231.28 26.6
 -8 2 0 169.48 28
 -8 2 0 178.18 16.8
 7 -2 0 20.6 11.5
 7 -2 0 15.5 10.2
 7 -2 0 4.3 10.4
 7 -2 0 10.9 13.9
 7 -2 0 0.9 13.1
 7 -2 0 9.7 9.1
 7 -2 0 8.4 15.8
 7 -2 0 7.8 11.2
 -7 2 0 17 15.6
 -7 2 0 -5.4 12.3
 -7 2 0 8.1 5.7
 -7 2 0 -9.5 11.2
 -7 2 0 25.3 17.1
 -7 2 0 1.6 9.7
 6 -2 0 48.7 10.3
 6 -2 0 25.1 10.7
 6 -2 0 49.8 11.6
 6 -2 0 52.09 17
 6 -2 0 38.4 14.9
 6 -2 0 46.9 10.5
 6 -2 0 44.9 12.7
 6 -2 0 36.6 10.6
 6 -2 0 41.9 8.7
 -6 2 0 16.5 13
 -6 2 0 54.49 12.5
 -6 2 0 40.6 6.1
 -6 2 0 26.1 13.9
 -6 2 0 55.89 13
 -6 2 0 60.19 12
 -6 2 0 30.1 11.9
 5 -2 0 138.99 15.4
 5 -2 0 121.59 17.9
 5 -2 0 143.79 16.6
 5 -2 0 127.59 14.1
 5 -2 0 107.09 13.8
 5 -2 0 116.99 17.3
 5 -2 0 126.99 13.7
 -5 2 0 102.09 15.1
 -5 2 0 108.49 11
 -5 2 0 141.89 17.7
 -5 2 0 112.69 15.7
 -5 2 0 132.39 9.7
 -5 2 0 127.79 17.5
 4 -2 0 365.86 29.6
 4 -2 0 471.55 30.7
 4 -2 0 423.66 30
 4 -2 0 380.56 31.3
 4 -2 0 450.95 28.8
 4 -2 0 462.15 29.8
 4 -2 0 471.15 32
 4 -2 0 429.06 30.1
 -4 2 0 424.66 33.4
 -4 2 0 415.96 28.9
 -4 2 0 463.65 32.5
 -4 2 0 430.16 30.3
 -4 2 0 395.46 31.1
 -4 2 0 404.86 30.4
 3 -2 0 99.79 11.5
 3 -2 0 90.19 9.5
 3 -2 0 96.29 11.6
 3 -2 0 86.29 9
 3 -2 0 101.29 8
 3 -2 0 99.59 10.1
 3 -2 0 98.09 9.6
 3 -2 0 92.19 9.3
 3 -2 0 102.79 12.5
 -3 2 0 97.29 9
 -3 2 0 79.69 10.8
 -3 2 0 108.19 9.7
 -3 2 0 108.89 14.5
 -3 2 0 86.09 11.5
 -3 2 0 94.99 8.2
 2 -2 0 2024.3 125.99
 2 -2 0 1977.4 126.59
 2 -2 0 2095.99 128.29
 2 -2 0 1817.62 126.49
 2 -2 0 2070.09 126.29
 2 -2 0 1774.32 126.99
 2 -2 0 1966.4 127.09
 2 -2 0 2001 126.89
 2 -2 0 2087.19 126.89
 2 -2 0 2140.19 128.29
 -2 2 0 2035.6 128.19
 -2 2 0 2072.99 126.89
 -2 2 0 2089.09 126.59
 -2 2 0 1891.21 126.69
 1 -2 0 291.77 18.4
 1 -2 0 280.97 18.4
 1 -2 0 223.98 18.1
 1 -2 0 257.47 18.1
 1 -2 0 277.27 18.5
 1 -2 0 260.17 19.2
 1 -2 0 253.57 17.8
 -1 2 0 255.97 17.7
 -1 2 0 271.67 18.6
 -1 2 0 285.07 19.3
 -1 2 0 319.67 18.4
 0 -2 0 4250.27 271.47
 0 -2 0 4914.51 271.67
 0 -2 0 4405.76 271.67
 0 -2 0 4742.93 271.87
 0 -2 0 4657.53 271.97
 0 -2 0 4194.98 271.47
 0 -2 0 3817.52 271.27
 0 2 0 3877.01 271.27
 0 2 0 3912.71 271.17
 0 2 0 3891.21 271.97
 0 2 0 4159.78 271.47
 0 2 0 4613.64 271.97
 0 2 0 4470.95 271.67
 0 2 0 4630.54 271.97
 -1 -2 0 138.59 10.9
 -1 -2 0 165.68 11.4
 -1 -2 0 164.88 11.4
 -1 -2 0 160.68 10.9
 -1 -2 0 142.19 11
 -1 -2 0 167.88 11.3
 -1 -2 0 173.08 11.4
 -1 -2 0 159.38 11.8
 -1 -2 0 157.98 11
 1 2 0 156.68 11.3
 1 2 0 173.38 11.5
 1 2 0 142.09 10.8
 1 2 0 135.69 10.8
 1 2 0 162.98 11.1
 1 2 0 140.79 10.9
 1 2 0 164.58 11.4
 1 2 0 162.58 12.1
 1 2 0 166.08 11.4
 -2 -2 0 3516.55 193.58
 -2 -2 0 3060.49 192.18
 -2 -2 0 3323.87 193.28
 -2 -2 0 3128.39 193.08
 -2 -2 0 2812.22 192.38
 -2 -2 0 2805.32 192.48
 -2 -2 0 3133.29 192.98
 -2 -2 0 2785.12 192.38
 2 2 0 3029.4 192.58
 2 2 0 3262.67 192.98
 2 2 0 2940.81 192.48
 2 2 0 2839.52 192.58
 2 2 0 3047.2 192.98
 -3 -2 0 78.39 9.8
 -3 -2 0 80.79 7.9
 -3 -2 0 80.89 8.8
 -3 -2 0 82.19 9.1
 -3 -2 0 67.19 8.6
 -3 -2 0 85.79 9.6
 -3 -2 0 81.69 8.8
 -3 -2 0 86.99 9.9
 3 2 0 85.79 10
 3 2 0 82.99 8.7
 3 2 0 68.29 7.3
 3 2 0 83.39 8.7
 3 2 0 86.69 9.2
 3 2 0 78.89 8.6
 3 2 0 78.99 10.1
 3 2 0 88.59 9.8
 3 2 0 74.89 8.1
 -4 -2 0 64.29 9
 -4 -2 0 68.69 9.3
 -4 -2 0 80.89 10.9
 -4 -2 0 49.99 8.9
 -4 -2 0 64.39 8.5
 -4 -2 0 70.99 10.5
 -4 -2 0 56.69 7.3
 -4 -2 0 68.99 8.9
 4 2 0 55.69 8.7
 4 2 0 61.89 10.2
 4 2 0 68.29 7.8
 4 2 0 75.29 9.8
 4 2 0 67.29 9.1
 4 2 0 59.99 8.7
 4 2 0 73.99 8.7
 4 2 0 74.79 10.1
 4 2 0 67.99 9
 -5 -2 0 199.38 20.4
 -5 -2 0 185.58 19
 -5 -2 0 207.98 19
 -5 -2 0 210.28 19.2
 -5 -2 0 207.28 18.2
 -5 -2 0 209.38 19.5
 -5 -2 0 176.28 14.6
 -5 -2 0 202.58 15.8
 -5 -2 0 183.18 17.9
 5 2 0 196.58 21
 5 2 0 193.78 16.7
 5 2 0 202.58 17.1
 5 2 0 203.88 19.3
 5 2 0 237.68 20.3
 5 2 0 198.98 19.1
 5 2 0 217.08 18
 5 2 0 182.88 17.3
 5 2 0 195.88 16.6
 -6 -2 0 171.98 18.1
 -6 -2 0 142.79 16.6
 -6 -2 0 112.69 13.2
 -6 -2 0 155.38 18.7
 -6 -2 0 141.19 16.6
 -6 -2 0 127.89 16.2
 -6 -2 0 131.59 18
 -6 -2 0 137.39 17.1
 6 2 0 113.19 14.5
 6 2 0 123.29 15.7
 6 2 0 114.09 16.3
 6 2 0 120.79 17.5
 6 2 0 142.69 17
 6 2 0 136.99 18.2
 6 2 0 119.29 14.4
 6 2 0 151.08 19.2
 6 2 0 111.29 15.5
 -7 -2 0 33.3 13.5
 -7 -2 0 16.1 11.4
 -7 -2 0 27.3 11.4
 -7 -2 0 38.4 9.7
 -7 -2 0 21.7 11.6
 -7 -2 0 29.3 14.3
 -7 -2 0 27.3 10.9
 7 2 0 21.1 11.5
 7 2 0 8.7 9.9
 7 2 0 29.9 10.4
 7 2 0 43.8 12.8
 7 2 0 22.3 10.4
 7 2 0 40.5 11.9
 7 2 0 41.1 10
 7 2 0 34.4 9.8
 7 2 0 30.4 14.5
 -8 -2 0 -3.1 12.9
 -8 -2 0 -9 15
 -8 -2 0 -3.3 12.6
 -8 -2 0 14.9 9.1
 -8 -2 0 14.9 14
 -8 -2 0 -5.4 15.7
 -8 -2 0 4 10.1
 8 2 0 0.3 12.4
 8 2 0 0.5 15.8
 8 2 0 3.6 11
 8 2 0 8.9 11
 8 2 0 -22.4 11.5
 8 2 0 14.5 11.2
 8 2 0 17 13.1
 8 2 0 12.8 11.3
 8 2 0 16.9 12.2
 -9 -2 0 -17.1 15.3
 -9 -2 0 28.9 14.6
 -9 -2 0 1.6 10.4
 -9 -2 0 8.7 16.1
 9 2 0 1.3 13.5
 9 2 0 3.4 15.6
 9 2 0 -19.6 13.9
 9 2 0 -20.5 13.2
 9 2 0 3.6 12.7
 9 2 0 3.3 12.6
 9 2 0 -2.5 16
 9 2 0 -42.3 18.9
 -10 -2 0 177.98 20.8
 -10 -2 0 113.09 22.2
 -10 -2 0 175.28 25.1
 -10 -2 0 148.09 25.7
 -10 -2 0 101.79 18.3
 10 2 0 196.38 25.2
 10 2 0 124.39 22.4
 10 2 0 127.79 29.7
 10 2 0 96.49 24.2
 10 2 0 162.58 24.6
 10 2 0 142.09 25
 -11 -2 0 -0.7 18.9
 -11 -2 0 -4.6 21.1
 -11 -2 0 -27.1 23.5
 -11 -2 0 -1.3 14.6
 11 2 0 9.3 21.1
 11 2 0 -31.1 24.5
 11 2 0 15.2 30.7
 11 2 0 9.8 20.5
 11 2 0 -12.5 17.5
 11 2 0 5.3 19
 -12 -2 0 14.9 22.5
 -12 -2 0 20.7 25.7
 -12 -2 0 24.6 17.9
 -12 -2 0 34.2 31.9
 12 2 0 8.3 25.9
 12 2 0 12.1 39.4
 12 2 0 59.19 23.3
 12 2 0 0.5 23.8
 12 2 0 5.7 25.4
 -13 -2 0 18.7 29.1
 -13 -2 0 -2.8 30.5
 -13 -2 0 34.2 21.5
 13 2 0 47.3 32.9
 13 2 0 -51.59 29.6
 13 2 0 11.5 26.7
 13 2 0 -24.5 33.1
 13 2 0 -10.7 49.6
 -14 -2 0 -7.8 33.4
 -14 -2 0 14.3 23.5
 -14 -2 0 -19.2 34.5
 14 2 0 7.7 34.7
 14 2 0 -33.7 38.8
 14 2 0 -11.2 34.4
 14 2 0 -10.9 31.3
 -15 -2 0 -16.6 36.1
 -15 -2 0 44.7 41.9
 -15 -2 0 -80.19 39.4
 15 2 0 -5.8 41.8
 15 2 0 -14.3 45
 15 2 0 36.1 39.7
 15 2 0 11.5 41.6
 -16 -2 0 -48.8 49.4
 16 2 0 -20.9 51.39
 16 2 0 30.8 70.19
 16 2 0 80.89 51.69
 15 -3 0 -5.9 49.2
 15 -3 0 71.39 57.19
 15 -3 0 -45.2 72.29
 -15 3 0 -72.49 51.59
 14 -3 0 -3.1 45.8
 14 -3 0 4.6 53.69
 14 -3 0 -39.2 40.1
 -14 3 0 -8.7 55.79
 -14 3 0 -10.7 42.7
 13 -3 0 -52.69 59.09
 13 -3 0 -71.09 31.2
 13 -3 0 8.8 28.6
 13 -3 0 -116.59 44.9
 -13 3 0 4 58.69
 -13 3 0 5.7 34.6
 12 -3 0 -17.8 34.9
 12 -3 0 -12.5 28.8
 12 -3 0 28.5 24.2
 12 -3 0 -41.4 26.3
 -12 3 0 -2.4 30.5
 -12 3 0 -26.9 28.7
 -12 3 0 14.8 39
 11 -3 0 -12.2 24
 11 -3 0 38.1 24.2
 11 -3 0 11.8 62.79
 11 -3 0 9.3 34.1
 11 -3 0 16.1 21.5
 -11 3 0 15.5 23.8
 -11 3 0 29.3 23.6
 -11 3 0 29.1 31.6
 10 -3 0 -6.8 17.5
 10 -3 0 15.4 20
 10 -3 0 41.4 20
 10 -3 0 -16.2 18.3
 10 -3 0 16.1 27.7
 -10 3 0 3.5 20.6
 -10 3 0 7.6 19.7
 -10 3 0 43 27.1
 9 -3 0 -17.5 16.7
 9 -3 0 29.4 16.2
 9 -3 0 -12.6 23.2
 9 -3 0 -7.9 19.2
 9 -3 0 7 25.4
 9 -3 0 10.2 25.7
 9 -3 0 -23.5 15.4
 9 -3 0 16.5 16.1
 -9 3 0 13.8 17.2
 -9 3 0 -12.9 21.5
 -9 3 0 -9.1 16.1
 8 -3 0 19.7 20.2
 8 -3 0 -21.9 12.1
 8 -3 0 -34.8 19.3
 8 -3 0 -9.1 15.8
 8 -3 0 -11.9 13.1
 8 -3 0 -14.6 13.2
 8 -3 0 -26.7 22
 8 -3 0 29.4 13.1
 -8 3 0 9.8 14.7
 -8 3 0 18.8 20.1
 -8 3 0 23.4 13.6
 -8 3 0 17.2 17.3
 7 -3 0 -2.2 9.8
 7 -3 0 20.1 16
 7 -3 0 -3.8 17.1
 7 -3 0 -6.9 13.6
 7 -3 0 4.6 17.9
 7 -3 0 2 10.7
 7 -3 0 -0.6 10.5
 7 -3 0 -8.4 10.6
 -7 3 0 -16 18.9
 -7 3 0 3 12.7
 -7 3 0 21.5 16
 -7 3 0 -2.6 11.2
 -7 3 0 10.9 14.3
 6 -3 0 -0.8 7.3
 6 -3 0 5.4 8.4
 6 -3 0 -8.5 8.7
 6 -3 0 -9.1 10
 6 -3 0 -12.9 15.4
 6 -3 0 -11.5 13.8
 6 -3 0 -10.8 12
 6 -3 0 2.6 8.9
 -6 3 0 -1 10.1
 -6 3 0 5.9 9.2
 -6 3 0 29.5 12.8
 -6 3 0 -0.9 6.3
 -6 3 0 4.8 11.9
 -6 3 0 5.9 15.3
 5 -3 0 -6.9 10
 5 -3 0 7.6 7.1
 5 -3 0 8.4 8.2
 5 -3 0 7.5 9.5
 5 -3 0 11.8 12.9
 5 -3 0 0.3 7.5
 5 -3 0 -3.3 6.6
 5 -3 0 -3.2 6.7
 5 -3 0 4.4 11.1
 -5 3 0 -16.6 13.3
 -5 3 0 9.4 9.9
 -5 3 0 1.8 8.4
 -5 3 0 -4.7 5.8
 -5 3 0 -12.3 9.7
 4 -3 0 -4.7 5.4
 4 -3 0 -5.3 6.6
 4 -3 0 -1.8 6.2
 4 -3 0 2.9 6
 4 -3 0 -2.3 6.1
 4 -3 0 -1.1 8.5
 4 -3 0 -8 5.5
 4 -3 0 -9.8 7.5
 4 -3 0 -24 8.4
 4 -3 0 5.2 4.6
 4 -3 0 5.2 7.7
 -4 3 0 -2.1 5.6
 -4 3 0 0.5 4.8
 -4 3 0 -8.8 8.2
 -4 3 0 3.2 5.2
 -4 3 0 7.1 8.5
 -4 3 0 -0.5 6.6
 3 -3 0 0.6 4.4
 3 -3 0 3.8 4.4
 3 -3 0 0.7 5
 3 -3 0 4.9 6.7
 3 -3 0 -7.5 7.7
 3 -3 0 0.7 5.2
 3 -3 0 3.7 4.8
 3 -3 0 1.8 3.2
 3 -3 0 -0.4 5.9
 3 -3 0 1.3 6.7
 -3 3 0 -1.9 4
 -3 3 0 3.6 4.1
 2 -3 0 -2.6 3.9
 2 -3 0 -3 5.5
 2 -3 0 1 2.2
 2 -3 0 3.7 4.5
 2 -3 0 -3.5 10
 2 -3 0 0.2 4.7
 2 -3 0 -1 2.2
 2 -3 0 1 4.5
 2 -3 0 6.2 3.5
 2 -3 0 5.8 8.1
 -2 3 0 -1.1 5.3
 -2 3 0 6.3 3.2
 -2 3 0 -0.4 3.9
 -2 3 0 2.4 5.3
 1 -3 0 -2 4.1
 1 -3 0 5.4 4
 1 -3 0 -0.9 3.2
 1 -3 0 2.7 2.1
 1 -3 0 -4.8 3.5
 1 -3 0 0.5 3.4
 1 -3 0 0 1.4
 1 -3 0 0.4 4.2
 1 -3 0 -2.3 4.3
 -1 3 0 -2.7 3.6
 -1 3 0 3.6 3.7
 -1 3 0 3.9 4.3
 -1 3 0 0.3 1.8
 0 -3 0 -2.8 3.6
 0 -3 0 -3 2.5
 0 -3 0 5.7 3.1
 0 -3 0 -2.4 3.2
 0 -3 0 1 2.6
 0 3 0 -2.7 1.8
 0 3 0 0.2 3.2
 0 3 0 -6.2 3.6
 0 3 0 -6 3.4
 0 3 0 -3.2 2.6
 0 3 0 1.5 2.1
 0 3 0 -1.3 3.5
 -1 -3 0 2.7 3.3
 -1 -3 0 -1.8 2.1
 -1 -3 0 -2.3 3.2
 -1 -3 0 -1.7 3.3
 -1 -3 0 -0.7 2.5
 -1 -3 0 1.7 3
 -1 -3 0 -3.3 4.4
 -1 -3 0 -2.6 3.7
 -1 -3 0 4.7 3
 1 3 0 4.3 2.6
 1 3 0 -2.3 2.1
 1 3 0 -3.3 3.3
 1 3 0 -3.9 3.4
 1 3 0 -1.2 2.6
 1 3 0 -1 2.7
 1 3 0 -5 3.2
 1 3 0 -4.4 3.3
 -2 -3 0 -0.5 3.1
 -2 -3 0 -2 3.8
 -2 -3 0 -0.3 4.4
 -2 -3 0 -4.4 4.6
 -2 -3 0 -1.4 4.7
 -2 -3 0 -0.5 3.7
 -2 -3 0 4.4 3.8
 -2 -3 0 0.5 3.7
 2 3 0 1.9 3.7
 2 3 0 3.7 4
 2 3 0 4.1 3.4
 2 3 0 0.2 4.4
 2 3 0 1.8 3.3
 2 3 0 3.7 3.6
 2 3 0 2.1 4.4
 2 3 0 2.3 4.4
 -3 -3 0 1.4 4
 -3 -3 0 2.8 4.6
 -3 -3 0 -1.9 3.9
 -3 -3 0 -5.5 4.5
 -3 -3 0 0.1 5.2
 3 3 0 -2.9 3.9
 3 3 0 -3.1 4.1
 3 3 0 4.5 4.8
 3 3 0 6.2 5.2
 3 3 0 0.7 4.2
 3 3 0 -1.7 4.5
 -4 -3 0 7.9 5
 -4 -3 0 11.9 5.7
 -4 -3 0 1.9 5.6
 -4 -3 0 -4.6 4.1
 -4 -3 0 0.9 6
 -4 -3 0 -0.3 6.1
 -4 -3 0 12 5.2
 -4 -3 0 4 5.5
 4 3 0 0.6 6.4
 4 3 0 0.5 4.6
 4 3 0 1.4 4.9
 4 3 0 3.9 6.7
 4 3 0 11.9 6.4
 4 3 0 6.5 5.4
 4 3 0 -7.9 5.2
 4 3 0 -4.7 4.7
 -5 -3 0 1.7 6.3
 -5 -3 0 -1.5 6.8
 -5 -3 0 1.9 5.7
 -5 -3 0 -3.7 6.3
 -5 -3 0 -10.9 5.1
 -5 -3 0 -12.5 6.6
 -5 -3 0 0.2 7.2
 -5 -3 0 -7.2 6.8
 -5 -3 0 -0.5 4.7
 5 3 0 4.4 6.6
 5 3 0 0.9 6.1
 5 3 0 1.1 5
 5 3 0 -1.9 6.8
 5 3 0 0.7 5.9
 5 3 0 -0.8 7.5
 5 3 0 -1.8 9.1
 5 3 0 -1.6 5.9
 5 3 0 2.6 5.9
 -6 -3 0 2.4 8.6
 -6 -3 0 -6.1 6.2
 -6 -3 0 3.8 8.8
 -6 -3 0 2 9.8
 -6 -3 0 6 8.3
 -6 -3 0 -4.9 7.5
 -6 -3 0 0.6 5.2
 -6 -3 0 13.1 10
 6 3 0 3 9.2
 6 3 0 -5.6 11.1
 6 3 0 -1 7.5
 6 3 0 -8 8.1
 6 3 0 -3 9
 6 3 0 -6.8 7.5
 6 3 0 -4.6 8.1
 6 3 0 -3.2 6.7
 6 3 0 -2.8 6.9
 -7 -3 0 -3.9 7.7
 -7 -3 0 11 11.1
 -7 -3 0 -5.8 8.2
 -7 -3 0 -2.3 12.6
 -7 -3 0 13.8 11.2
 -7 -3 0 13.6 10.7
 -7 -3 0 -5.8 11.4
 -7 -3 0 -6.8 9.9
 7 3 0 9.8 9
 7 3 0 -7.1 10
 7 3 0 -9.3 9.4
 7 3 0 -19.6 8.7
 7 3 0 0.9 8.7
 7 3 0 -1.7 10.4
 7 3 0 10.6 13.1
 7 3 0 -11.1 9.2
 7 3 0 6.8 9.3
 -8 -3 0 6.8 12.7
 -8 -3 0 -3.4 15
 -8 -3 0 4 14.5
 -8 -3 0 5.7 12.2
 -8 -3 0 7.3 9.5
 -8 -3 0 4.7 17.7
 -8 -3 0 -27.3 13
 -8 -3 0 -22 10.1
 8 3 0 -1.7 10.5
 8 3 0 -0.2 10.5
 8 3 0 9 12.5
 8 3 0 5.1 16.2
 8 3 0 -8.2 11.9
 8 3 0 -5.3 11.2
 8 3 0 -11.4 10.4
 8 3 0 -4.1 11.3
 8 3 0 11 11.5
 -9 -3 0 -1.6 15.5
 -9 -3 0 14.1 13.1
 -9 -3 0 -15.3 13.9
 -9 -3 0 30.9 17.7
 -9 -3 0 11 10.7
 9 3 0 11.1 14.2
 9 3 0 18.5 13.8
 9 3 0 13.2 12.9
 9 3 0 -4.4 20.6
 9 3 0 7.9 13.6
 9 3 0 3.3 13
 9 3 0 3.9 14.3
 9 3 0 7.4 17.4
 -10 -3 0 -19 16.8
 -10 -3 0 -24 20.3
 -10 -3 0 -0.2 13.3
 -10 -3 0 5.3 14.8
 10 3 0 -15.1 23.9
 10 3 0 0.2 14.4
 10 3 0 6.4 16.4
 10 3 0 29.5 17.2
 10 3 0 13.7 16.6
 10 3 0 29.1 18.2
 -11 -3 0 20.9 19.8
 -11 -3 0 19.1 15.5
 -11 -3 0 39.4 30
 -11 -3 0 -11.5 20.4
 11 3 0 20.8 19.7
 11 3 0 11.7 20.2
 11 3 0 -4.1 20
 11 3 0 15.5 21.1
 11 3 0 13.2 19.1
 11 3 0 -42.3 30.1
 -12 -3 0 0.5 21.7
 -12 -3 0 -10.9 17.5
 -12 -3 0 -21.2 23.6
 12 3 0 58.69 24.8
 12 3 0 12.8 22
 12 3 0 3.8 26.1
 12 3 0 74.49 39.4
 12 3 0 17 24.5
 -13 -3 0 -9.4 27.8
 -13 -3 0 2.3 20.6
 -13 -3 0 4.7 29.6
 13 3 0 -13 27.2
 13 3 0 -15.5 28.1
 13 3 0 114.69 49.6
 13 3 0 -26.1 31.7
 13 3 0 -63.89 26.8
 -14 -3 0 11.9 33.3
 -14 -3 0 -10.9 24
 -14 -3 0 46.9 34.6
 14 3 0 -51.39 31.5
 14 3 0 28.6 33.6
 14 3 0 28.9 34.2
 14 3 0 -37.7 36.4
 -15 -3 0 -35.5 38
 -15 -3 0 -82.69 39.8
 -15 -3 0 -43.7 29.7
 15 3 0 73.89 40.2
 15 3 0 -13.9 45.6
 15 3 0 13.2 39.5
 15 3 0 35.1 45.9
 -16 -3 0 54.49 50.29
 16 3 0 56.99 50.49
 16 3 0 -85.99 55.49
 16 3 0 77.69 53.29
 16 3 0 -27.7 44.7
 14 -4 0 -87.69 70.59
 14 -4 0 76.89 45.6
 14 -4 0 4.2 41.7
 -14 4 0 -27.4 61.09
 -14 4 0 -49.4 43.7
 13 -4 0 15.6 36
 13 -4 0 -1.4 46
 -13 4 0 -22.7 37.4
 -13 4 0 -33.3 50.39
 12 -4 0 -32 29.3
 12 -4 0 20.2 29.8
 12 -4 0 69.09 40.7
 12 -4 0 1 25.1
 -12 4 0 24.4 31.7
 -12 4 0 -18.5 42.7
 11 -4 0 55.49 23.2
 11 -4 0 106.29 37.7
 11 -4 0 79.59 25.7
 11 -4 0 29.1 24
 -11 4 0 30.4 25.3
 -11 4 0 0.7 26
 -11 4 0 66.29 50.19
 10 -4 0 101.99 35
 10 -4 0 154.08 34.9
 10 -4 0 114.49 28.9
 10 -4 0 158.08 27.2
 10 -4 0 118.69 25.3
 10 -4 0 174.58 25.4
 10 -4 0 155.08 25.5
 -10 4 0 145.39 27.2
 -10 4 0 152.68 28.2
 -10 4 0 176.98 36
 9 -4 0 298.77 33.5
 9 -4 0 261.97 33.6
 9 -4 0 239.58 32.4
 9 -4 0 285.37 37.2
 9 -4 0 288.67 37.1
 9 -4 0 248.48 32
 9 -4 0 337.97 42.3
 9 -4 0 304.67 41.3
 9 -4 0 298.97 31.4
 -9 4 0 306.07 35.5
 -9 4 0 283.77 34.1
 -9 4 0 345.57 41
 8 -4 0 29.6 16.1
 8 -4 0 29.3 15
 8 -4 0 2.2 20.6
 8 -4 0 9.3 13
 8 -4 0 19.9 17.8
 8 -4 0 9.2 13.1
 8 -4 0 24.7 21.5
 8 -4 0 21.3 17.3
 8 -4 0 8.8 15.3
 -8 4 0 -2.6 14.7
 -8 4 0 6 23.7
 -8 4 0 -34.4 17.9
 -8 4 0 5.8 15.2
 7 -4 0 203.18 24.2
 7 -4 0 233.38 27.9
 7 -4 0 182.48 28.3
 7 -4 0 202.48 22
 7 -4 0 216.88 24.5
 7 -4 0 199.88 29.2
 7 -4 0 229.08 27.2
 7 -4 0 228.38 24.1
 -7 4 0 254.67 46
 -7 4 0 235.88 25.8
 -7 4 0 243.78 30.5
 -7 4 0 246.68 25.7
 6 -4 0 12 9.8
 6 -4 0 10.1 10.5
 6 -4 0 -0.9 9.1
 6 -4 0 16.6 11.6
 6 -4 0 -6.6 13.8
 6 -4 0 2.7 12.2
 6 -4 0 15.2 16.8
 6 -4 0 7.6 14.4
 6 -4 0 3 8.7
 6 -4 0 23 9.9
 -6 4 0 3.3 9.5
 -6 4 0 24.6 15.3
 -6 4 0 -9.1 10.3
 -6 4 0 3.9 13.7
 5 -4 0 5.3 7.8
 5 -4 0 -15 10.2
 5 -4 0 6.4 11.5
 5 -4 0 10.5 9.1
 5 -4 0 0.6 6.9
 5 -4 0 7.4 11.9
 5 -4 0 0.4 8.6
 5 -4 0 10.9 8.4
 5 -4 0 -3.2 6.8
 5 -4 0 9.6 13.9
 5 -4 0 20.7 9.4
 -5 4 0 1.4 11.1
 -5 4 0 0.3 8.7
 -5 4 0 -0.4 11.8
 -5 4 0 1.5 7.7
 4 -4 0 607.84 40
 4 -4 0 610.74 44.9
 4 -4 0 577.64 38.9
 4 -4 0 556.64 38.1
 4 -4 0 546.75 39.3
 4 -4 0 589.54 38.9
 4 -4 0 519.35 39.9
 4 -4 0 594.14 40.8
 4 -4 0 599.14 42.7
 -4 4 0 617.74 43.2
 -4 4 0 498.55 43
 -4 4 0 523.15 40.9
 -4 4 0 572.84 39.3
 3 -4 0 38.3 5.9
 3 -4 0 44.6 10.4
 3 -4 0 41 5.3
 3 -4 0 42.7 7.9
 3 -4 0 44.7 8.3
 3 -4 0 38.1 11.7
 3 -4 0 47.5 8.6
 3 -4 0 42.1 8.7
 3 -4 0 40.5 6.5
 -3 4 0 36.7 9.6
 -3 4 0 29.5 9.6
 -3 4 0 28.8 7.9
 -3 4 0 41.8 6.9
 2 -4 0 40.5 8.9
 2 -4 0 34.1 4.1
 2 -4 0 40.1 6.3
 2 -4 0 38.9 7.3
 2 -4 0 28.8 6.5
 2 -4 0 46 7.3
 2 -4 0 30.9 4.4
 2 -4 0 35.9 6.2
 -2 4 0 22.6 7.5
 -2 4 0 42.4 8.3
 -2 4 0 45.5 7.2
 -2 4 0 39.8 5.3
 1 -4 0 497.75 32.1
 1 -4 0 507.75 31.9
 1 -4 0 459.35 31.2
 1 -4 0 477.85 33.1
 1 -4 0 533.85 33.2
 1 -4 0 484.65 32.4
 -1 4 0 495.35 32.5
 -1 4 0 485.15 33.4
 -1 4 0 455.45 34
 -1 4 0 475.65 34.1
 0 -4 0 7225.28 456.25
 0 -4 0 6918.51 456.65
 0 -4 0 7419.86 456.35
 0 -4 0 7531.25 457.05
 0 -4 0 7280.37 456.45
 0 -4 0 7218.28 457.15
 0 4 0 7594.64 456.65
 0 4 0 7070.09 456.35
 0 4 0 7485.25 457.95
 0 4 0 7114.49 457.55
 0 4 0 7526.05 457.25
 0 4 0 6790.32 455.55
 -1 -4 0 2458.85 159.28
 -1 -4 0 2597.74 159.48
 -1 -4 0 2443.66 158.68
 -1 -4 0 2347.27 158.28
 -1 -4 0 2501.15 159.18
 -1 -4 0 2463.85 159.48
 -1 -4 0 2678.63 159.18
 1 4 0 2636.74 159.58
 1 4 0 2482.15 159.48
 1 4 0 2628.94 159.48
 1 4 0 2427.26 158.78
 1 4 0 2408.06 158.28
 1 4 0 2505.85 158.88
 1 4 0 2599.94 160.38
 1 4 0 2508.15 159.38
 -2 -4 0 1567.74 103.89
 -2 -4 0 1647.64 104.49
 -2 -4 0 1646.14 104.69
 -2 -4 0 1591.24 104.69
 -2 -4 0 1593.14 104.09
 -2 -4 0 1686.93 104.39
 2 4 0 1642.64 105.49
 2 4 0 1636.74 104.19
 2 4 0 1643.54 104.89
 2 4 0 1586.94 104.09
 2 4 0 1612.24 104.59
 2 4 0 1694.93 105.09
 2 4 0 1673.73 104.29
 -3 -4 0 802.32 50.69
 -3 -4 0 762.92 50.39
 -3 -4 0 758.22 50.59
 -3 -4 0 740.83 50.39
 -3 -4 0 745.33 51.09
 -3 -4 0 752.02 51.49
 -3 -4 0 764.12 50.29
 -3 -4 0 766.92 51.19
 3 4 0 724.63 51.59
 3 4 0 762.62 50.59
 3 4 0 781.22 50.59
 3 4 0 756.12 50.29
 3 4 0 732.43 50.99
 3 4 0 750.52 50.29
 3 4 0 800.92 50.69
 3 4 0 806.52 51.59
 -4 -4 0 87.69 10.2
 -4 -4 0 88.59 10.8
 -4 -4 0 75.39 10.3
 -4 -4 0 102.49 12.9
 -4 -4 0 90.99 10.7
 -4 -4 0 90.09 11.7
 -4 -4 0 101.59 13.5
 -4 -4 0 94.09 11.4
 4 4 0 91.89 11.9
 4 4 0 82.09 11.6
 4 4 0 96.39 11.1
 4 4 0 74.49 10.6
 4 4 0 85.49 10.7
 4 4 0 81.39 10.7
 4 4 0 84.99 10.7
 4 4 0 75.69 12.3
 -5 -4 0 293.17 22.7
 -5 -4 0 276.97 22.6
 -5 -4 0 274.57 24
 -5 -4 0 252.47 22.1
 -5 -4 0 253.57 20.7
 -5 -4 0 297.27 23.6
 -5 -4 0 276.27 22.7
 -5 -4 0 271.37 23.4
 -5 -4 0 300.87 21.6
 5 4 0 263.47 22.2
 5 4 0 267.37 22.6
 5 4 0 274.47 24.5
 5 4 0 290.97 23.3
 5 4 0 268.17 22.5
 5 4 0 264.17 23.8
 5 4 0 279.47 21.7
 5 4 0 248.88 21.8
 5 4 0 277.47 20.1
 -6 -4 0 174.38 18.2
 -6 -4 0 158.58 18.3
 -6 -4 0 153.88 15.1
 -6 -4 0 165.98 18.5
 -6 -4 0 140.69 18.2
 -6 -4 0 216.18 18.9
 -6 -4 0 156.68 19.5
 -6 -4 0 170.48 16.6
 -6 -4 0 151.18 18.1
 6 4 0 150.38 19.1
 6 4 0 134.49 17.9
 6 4 0 149.09 20.3
 6 4 0 188.68 17.9
 6 4 0 168.48 15.1
 6 4 0 158.58 18
 6 4 0 149.09 21.9
 6 4 0 130.49 16.1
 6 4 0 169.58 18.3
 -7 -4 0 980.5 78.69
 -7 -4 0 1179.28 77.89
 -7 -4 0 1049.79 76.99
 -7 -4 0 1174.18 78.99
 -7 -4 0 1090.59 77.09
 -7 -4 0 1117.49 78.59
 -7 -4 0 1263.57 78.49
 -7 -4 0 1117.69 74.29
 -7 -4 0 1231.88 76.29
 7 4 0 1123.59 77.79
 7 4 0 1158.28 76.89
 7 4 0 1170.48 75.39
 7 4 0 1147.89 77.49
 7 4 0 1136.69 77.29
 7 4 0 1211.28 78.79
 7 4 0 1132.69 76.49
 7 4 0 1108.19 79.49
 7 4 0 1127.39 78.79
 -8 -4 0 5.2 11.6
 -8 -4 0 -11.8 12.8
 -8 -4 0 -23.9 15.3
 -8 -4 0 20.7 17.8
 -8 -4 0 3.4 12.7
 -8 -4 0 -6.9 7.4
 -8 -4 0 2.6 9.3
 -8 -4 0 24.1 14.9
 -8 -4 0 -3.2 11.4
 8 4 0 -6.8 11.5
 8 4 0 -10.9 11.2
 8 4 0 10.2 17.3
 8 4 0 -5.2 11.2
 8 4 0 -9 12.3
 8 4 0 5 11.4
 8 4 0 -24.3 12.1
 8 4 0 -1 9.1
 8 4 0 11.3 13.4
 -9 -4 0 -16.8 14.2
 -9 -4 0 0.4 11.2
 -9 -4 0 19.4 14.8
 -9 -4 0 -18.5 17.6
 -9 -4 0 -5.3 14.1
 -9 -4 0 -11.7 12.9
 9 4 0 0 15.1
 9 4 0 -3.5 11.8
 9 4 0 -16.8 14.2
 9 4 0 -25.8 13.3
 9 4 0 28.2 20.8
 9 4 0 25.1 15.3
 9 4 0 -4.3 13.4
 -10 -4 0 -26.9 22
 -10 -4 0 -8.6 17.7
 -10 -4 0 23.6 20
 -10 -4 0 -23.5 15.2
 -10 -4 0 0.9 13.3
 10 4 0 12.4 16.5
 10 4 0 -30.1 24.4
 10 4 0 -1.3 15.4
 10 4 0 -2.1 17.5
 10 4 0 15.6 18.6
 10 4 0 -18.2 15.5
 -11 -4 0 33.2 17.4
 -11 -4 0 39.7 21.3
 -11 -4 0 75.79 23.7
 11 4 0 36.5 19.7
 11 4 0 70.19 22.3
 11 4 0 41.4 20.8
 11 4 0 41.8 31.2
 11 4 0 47.2 23
 11 4 0 70.09 26
 -12 -4 0 117.99 23.2
 -12 -4 0 167.38 31.8
 -12 -4 0 116.79 27.2
 12 4 0 152.98 29.8
 12 4 0 69.19 41.6
 12 4 0 115.59 27.8
 12 4 0 104.49 28.1
 12 4 0 122.89 31
 12 4 0 200.38 30.2
 -13 -4 0 23.6 28.9
 -13 -4 0 21.4 23.5
 -13 -4 0 31.2 30.7
 -13 -4 0 56.59 23.3
 13 4 0 51.39 29.5
 13 4 0 50.69 31.2
 13 4 0 26.3 32.6
 13 4 0 55.39 29.6
 -14 -4 0 -15.4 25.4
 -14 -4 0 16.7 33.9
 -14 -4 0 2.2 32.1
 14 4 0 16.2 32.5
 14 4 0 -12.6 31.3
 14 4 0 -18.2 37.7
 14 4 0 16.5 36.1
 -15 -4 0 -32.7 38.2
 -15 -4 0 105.49 32.3
 -15 -4 0 -4.2 40.5
 15 4 0 -39.1 39.8
 15 4 0 97.79 46.9
 15 4 0 1.7 40.4
 15 4 0 -34.2 36.4
 -16 -4 0 11.6 47.9
 -16 -4 0 -74.49 35.1
 -16 -4 0 -48.3 46.5
 16 4 0 9.4 56.49
 16 4 0 24.3 60.49
 16 4 0 -2.1 46
 16 4 0 -82.29 44.8
 -17 -4 0 -47.6 53.99
 17 4 0 -63.89 53.29
 17 4 0 -4.5 54.89
 14 -5 0 -18.7 53.79
 14 -5 0 -37.3 60.99
 -14 5 0 43 88.39
 -14 5 0 25.4 56.59
 13 -5 0 -41.7 57.79
 13 -5 0 65.19 39.1
 13 -5 0 68.39 38.1
 -13 5 0 -58.49 38.4
 -13 5 0 102.09 57.59
 12 -5 0 -31.4 29.4
 12 -5 0 28.3 28
 12 -5 0 -42.2 30.6
 12 -5 0 18.4 43.1
 -12 5 0 -42.5 46.1
 -12 5 0 -8.1 33.1
 11 -5 0 -29.3 23.5
 11 -5 0 -27.9 35
 11 -5 0 3.3 23.9
 11 -5 0 -19.7 24.6
 -11 5 0 51.39 41
 -11 5 0 -28.4 26.2
 10 -5 0 21.9 19.7
 10 -5 0 18.1 21.7
 10 -5 0 40.5 25.3
 10 -5 0 17.7 29.7
 10 -5 0 -29.8 31.2
 10 -5 0 11 21.3
 10 -5 0 49.6 25.6
 -10 5 0 -22.7 21.9
 -10 5 0 -13.3 35.9
 -10 5 0 25 22.7
 9 -5 0 0.3 25.8
 9 -5 0 21.1 18.7
 9 -5 0 -33.6 18
 9 -5 0 15.4 21.6
 9 -5 0 -5.4 18
 9 -5 0 -2.1 18.3
 9 -5 0 -6.2 29.2
 9 -5 0 20.7 16.4
 9 -5 0 -18 27
 -9 5 0 3.1 19.1
 -9 5 0 29.8 27.6
 -9 5 0 -5.5 17.9
 8 -5 0 3.7 15.4
 8 -5 0 -17.7 15.2
 8 -5 0 -36 20.5
 8 -5 0 25.1 22.2
 8 -5 0 -6.3 25
 8 -5 0 -8.9 16
 8 -5 0 -3.3 12.7
 8 -5 0 47.1 18.5
 8 -5 0 -2.2 17.9
 -8 5 0 1.2 20.8
 -8 5 0 11 16.3
 -8 5 0 -2.1 27.6
 -8 5 0 -14.2 15.2
 7 -5 0 -6 11.5
 7 -5 0 -12.7 18.2
 7 -5 0 6.9 12.4
 7 -5 0 12.9 12.7
 7 -5 0 30.1 20.6
 7 -5 0 10.2 10.4
 7 -5 0 -9.9 17.7
 7 -5 0 0.9 14.7
 7 -5 0 12.5 13.7
 -7 5 0 -32.1 19.8
 -7 5 0 -0.1 12.6
 -7 5 0 36.6 19
 -7 5 0 16.9 12.9
 6 -5 0 -2.2 11.3
 6 -5 0 2.8 12
 6 -5 0 6.2 11.6
 6 -5 0 15 14.5
 6 -5 0 13.8 18
 6 -5 0 -6 9.8
 6 -5 0 -12.8 13.7
 6 -5 0 7.2 9.5
 6 -5 0 -4.9 8.7
 6 -5 0 22.3 11.5
 -6 5 0 -0.4 10.7
 -6 5 0 -11.6 14.1
 -6 5 0 19.1 16.9
 5 -5 0 -3.4 8.6
 5 -5 0 -7.6 11.5
 5 -5 0 -15.5 11.1
 5 -5 0 11.5 7.3
 5 -5 0 1 10.7
 5 -5 0 -17.1 9.7
 5 -5 0 -0.8 9.8
 5 -5 0 -17.7 13.5
 5 -5 0 -13.8 9.2
 5 -5 0 -13.9 14.9
 5 -5 0 9.6 8.5
 -5 5 0 15.5 14
 -5 5 0 8.8 7.6
 -5 5 0 9.3 13
 4 -5 0 1.6 6
 4 -5 0 4.5 9.2
 4 -5 0 -13 9.1
 4 -5 0 0.4 7.3
 4 -5 0 15.9 8.6
 4 -5 0 -0.9 14.3
 4 -5 0 5 8.6
 4 -5 0 7.5 5.7
 4 -5 0 9.7 11.4
 4 -5 0 -21.2 8.7
 -4 5 0 3.6 6.6
 -4 5 0 -19.8 10.8
 -4 5 0 -8.2 11.2
 3 -5 0 -11.9 7.8
 3 -5 0 7 4.6
 3 -5 0 1.2 9.8
 3 -5 0 -6 6.5
 3 -5 0 0.3 7.4
 3 -5 0 8.5 4.9
 3 -5 0 2.4 7.2
 3 -5 0 -3.8 5.2
 3 -5 0 -16.1 12
 3 -5 0 3.9 6.1
 -3 5 0 6.2 5.2
 -3 5 0 8.4 9.2
 -3 5 0 -7.6 8.1
 -3 5 0 8.7 7.5
 -3 5 0 -3.6 9
 2 -5 0 -1.8 7.7
 2 -5 0 2.4 4.6
 2 -5 0 0.4 5.9
 2 -5 0 -1.1 3.1
 2 -5 0 -10.8 7.5
 2 -5 0 -0.4 4.3
 2 -5 0 -0.8 6.2
 2 -5 0 -6.8 6.1
 -2 5 0 -10.9 7.3
 -2 5 0 -4 6.2
 -2 5 0 3.8 8.1
 -2 5 0 -10.8 6.4
 -2 5 0 -2.4 3.5
 1 -5 0 4.5 4.5
 1 -5 0 10.2 5.6
 1 -5 0 3.5 4.8
 1 -5 0 -0.7 2.8
 1 -5 0 -2.2 7
 1 -5 0 -4.6 4.1
 1 -5 0 4.8 6.7
 -1 5 0 -10.8 6
 -1 5 0 0.8 5.9
 -1 5 0 -7.7 5
 -1 5 0 4.9 7
 0 -5 0 3.4 5.3
 0 -5 0 7.8 4.6
 0 -5 0 8.9 5.3
 0 -5 0 9.3 3.2
 0 -5 0 2.8 4.9
 0 -5 0 5.3 4.3
 0 5 0 -4.8 5.6
 0 5 0 7.6 5.5
 0 5 0 5.9 5.2
 0 5 0 6.2 5.6
 0 5 0 6.8 5.4
 0 5 0 5.8 4.7
 -1 -5 0 -6.7 5.1
 -1 -5 0 0.7 5.3
 -1 -5 0 -9.7 4.5
 -1 -5 0 -7.3 2.8
 -1 -5 0 -1.6 5
 -1 -5 0 2.9 5.2
 -1 -5 0 -2 3.7
 1 5 0 2.7 4.5
 1 5 0 0.6 5.1
 1 5 0 -1.8 5.2
 1 5 0 -3.6 5.1
 1 5 0 -5.2 6.1
 1 5 0 -1 4.2
 1 5 0 -0.5 5.9
 1 5 0 -6.4 2.7
 -2 -5 0 -3.3 5
 -2 -5 0 -4.7 7.3
 -2 -5 0 -1.3 4.9
 -2 -5 0 -1.9 4.3
 -2 -5 0 4.8 6.4
 -2 -5 0 -12.4 4.9
 -2 -5 0 -4.1 4.9
 -2 -5 0 -5.2 3.5
 2 5 0 -0.9 4.6
 2 5 0 -2.8 5.7
 2 5 0 -2.3 5.7
 2 5 0 -5.3 4.5
 2 5 0 -7.7 4.6
 2 5 0 -3.6 4.5
 -3 -5 0 -1.2 6.8
 -3 -5 0 -0.2 5.5
 -3 -5 0 -13.6 5.6
 -3 -5 0 1.4 6.5
 -3 -5 0 -6.4 5.4
 -3 -5 0 2.6 4.4
 -3 -5 0 -12.6 6.5
 -3 -5 0 5.8 5.7
 3 5 0 -5.5 5.3
 3 5 0 -8.9 6.6
 3 5 0 -0.3 4.6
 3 5 0 4.6 6.4
 3 5 0 8.2 7.4
 3 5 0 -4.2 4.9
 3 5 0 7.3 5.9
 3 5 0 -12.7 6.9
 -4 -5 0 -9.3 7.6
 -4 -5 0 5.1 6.4
 -4 -5 0 -2.5 5.7
 -4 -5 0 -7.6 7.2
 -4 -5 0 -4.5 6.9
 -4 -5 0 3 6.6
 -4 -5 0 5.9 5.6
 -4 -5 0 -7.6 6.1
 4 5 0 -0.5 6.1
 4 5 0 4.1 8.1
 4 5 0 -2.1 6.3
 4 5 0 -1.3 7.5
 4 5 0 0.8 5.5
 4 5 0 7.9 7.7
 4 5 0 10.8 7.9
 4 5 0 2.4 6.7
 -5 -5 0 -1.3 9.2
 -5 -5 0 -0.8 6.7
 -5 -5 0 -0.2 6.5
 -5 -5 0 -1.6 8
 -5 -5 0 -13.2 7.8
 -5 -5 0 -1 7.8
 -5 -5 0 -0.5 8.4
 -5 -5 0 4.7 7.4
 -5 -5 0 -2.5 6.3
 5 5 0 -15.3 7
 5 5 0 3.4 8.8
 5 5 0 -3.2 6.2
 5 5 0 -11.9 10.1
 5 5 0 -8.8 8.2
 5 5 0 -3.6 8
 5 5 0 1.6 7.4
 5 5 0 7.7 7.9
 -6 -5 0 17.8 11
 -6 -5 0 4.6 8.6
 -6 -5 0 1.8 7.7
 -6 -5 0 9.3 9.6
 -6 -5 0 9.3 10.6
 -6 -5 0 4.6 8.9
 -6 -5 0 0 7.1
 -6 -5 0 -16.2 8.8
 -6 -5 0 3.7 8.9
 6 5 0 9.5 12.5
 6 5 0 4.1 6.3
 6 5 0 -2.4 9.9
 6 5 0 -1.2 7.5
 6 5 0 3.7 8.6
 6 5 0 3.1 9.1
 6 5 0 -7.5 9.7
 6 5 0 -5.1 8.9
 6 5 0 7.4 8.7
 -7 -5 0 -0.3 10.8
 -7 -5 0 -12.3 8.4
 -7 -5 0 5.7 13.2
 -7 -5 0 21 11.2
 -7 -5 0 -2 10.4
 -7 -5 0 8.5 11.7
 -7 -5 0 -0.9 12.7
 -7 -5 0 6.6 10.8
 7 5 0 1 10.3
 7 5 0 25.2 15.2
 7 5 0 -8.3 10
 7 5 0 0.7 10.8
 7 5 0 -9.1 12.4
 7 5 0 -9.1 9.2
 7 5 0 -8.7 9.8
 7 5 0 2.7 10.9
 7 5 0 6 12
 -8 -5 0 16.5 13.3
 -8 -5 0 -4.7 16.7
 -8 -5 0 -6.9 9.8
 -8 -5 0 1.6 14.1
 -8 -5 0 -25.4 12.9
 -8 -5 0 -7.2 10.6
 -8 -5 0 -1.9 13.3
 -8 -5 0 7.3 13.2
 8 5 0 -6.9 16.6
 8 5 0 -12.3 11.9
 8 5 0 6.7 14.6
 8 5 0 9.7 12.2
 8 5 0 -2.1 13.4
 8 5 0 -3.2 11.8
 8 5 0 -12.9 9.2
 8 5 0 12.1 12.2
 8 5 0 -2.8 12.1
 -9 -5 0 8 16.5
 -9 -5 0 -6.8 18.3
 -9 -5 0 8 15.3
 -9 -5 0 22.5 14.6
 -9 -5 0 5.1 11.9
 -9 -5 0 -13.2 14.3
 9 5 0 11 16.4
 9 5 0 -4.5 11.2
 9 5 0 17.3 14.2
 9 5 0 -2 19.7
 9 5 0 -2.9 15.3
 9 5 0 5.7 15.2
 -10 -5 0 14.1 14.2
 -10 -5 0 -7.6 18.6
 -10 -5 0 -21.8 15.8
 -10 -5 0 10 18.1
 -10 -5 0 -8.4 15.6
 10 5 0 13.3 26
 10 5 0 27.7 20.4
 10 5 0 -11.1 15.9
 10 5 0 -2.3 15
 10 5 0 24.2 18.2
 10 5 0 13.9 17.6
 -11 -5 0 6.8 22.4
 -11 -5 0 3.3 16.4
 -11 -5 0 2.3 19
 11 5 0 -8.2 22.1
 11 5 0 -17.1 20.5
 11 5 0 57.29 33.9
 11 5 0 11.9 19.1
 11 5 0 61.79 18.9
 11 5 0 -33.6 19.2
 -12 -5 0 -10.4 18.4
 -12 -5 0 21.6 23.2
 -12 -5 0 24 27.6
 12 5 0 29.5 29.7
 12 5 0 1.4 23.1
 12 5 0 -6.9 26.1
 12 5 0 -3.2 21.9
 12 5 0 25.8 26.6
 -13 -5 0 -25.8 21.9
 -13 -5 0 46.6 28.7
 -13 -5 0 -13.6 25.8
 13 5 0 7.8 26.3
 13 5 0 -10.8 30.9
 13 5 0 40.2 32.7
 13 5 0 39 28.8
 -14 -5 0 30.5 26.4
 -14 -5 0 11.9 32.2
 -14 -5 0 -1.4 33.6
 14 5 0 11.5 31.9
 14 5 0 43.2 35.6
 14 5 0 35.4 37.9
 14 5 0 53.49 38.5
 -15 -5 0 74.39 40.9
 -15 -5 0 7.2 31
 -15 -5 0 54.49 41.1
 15 5 0 -33.8 42.1
 15 5 0 2.4 36.9
 15 5 0 73.99 46.7
 15 5 0 -29.5 42.5
 -16 -5 0 -0.9 37
 -16 -5 0 -103.89 44.2
 16 5 0 -44.3 56.69
 16 5 0 -0.7 50.29
 16 5 0 46.1 47.9
 16 5 0 -55.69 46.1
 -17 -5 0 -73.59 53.89
 17 5 0 12.5 59.79
 17 5 0 6.9 56.19
 17 5 0 -27.3 68.59
 17 5 0 -11.1 56.29
 13 -6 0 -101.19 58.79
 13 -6 0 28.7 50.69
 -13 6 0 -53.09 44.4
 -13 6 0 58.79 66.69
 12 -6 0 2.9 33.9
 12 -6 0 -17.6 42.4
 12 -6 0 67.29 57.59
 -12 6 0 8.3 36.1
 -12 6 0 38.8 50.89
 11 -6 0 -16.3 27.3
 11 -6 0 -9.6 22.8
 11 -6 0 15.6 26.4
 11 -6 0 -27.9 42.7
 -11 6 0 -17.4 29.5
 -11 6 0 -28.4 44.9
 10 -6 0 3.1 19.3
 10 -6 0 11.3 24.1
 10 -6 0 8.7 23.4
 10 -6 0 43.6 29.6
 -10 6 0 8.5 37.4
 -10 6 0 -10.6 24.9
 9 -6 0 -2.8 19.3
 9 -6 0 17.4 21.6
 9 -6 0 49.8 22.4
 9 -6 0 14.8 23.7
 9 -6 0 -10.9 20.9
 9 -6 0 0 19.9
 9 -6 0 -27.1 29.9
 9 -6 0 -9.8 15.7
 9 -6 0 39 31.1
 -9 6 0 3.8 19.4
 -9 6 0 1.4 29.3
 -9 6 0 -10.7 20.3
 8 -6 0 -21.1 18.6
 8 -6 0 -6.6 20.4
 8 -6 0 0.5 16.4
 8 -6 0 15.6 25.7
 8 -6 0 12.4 22.6
 8 -6 0 23.5 16.2
 8 -6 0 3.1 16.6
 8 -6 0 10.5 18.2
 8 -6 0 20.6 13
 -8 6 0 16.7 16.4
 -8 6 0 22.6 30.6
 -8 6 0 -4.9 22.3
 7 -6 0 -27.5 21.3
 7 -6 0 1.4 13
 7 -6 0 15 17
 7 -6 0 25.6 13.9
 7 -6 0 10.5 10.4
 7 -6 0 32.1 18.7
 7 -6 0 1 14.6
 7 -6 0 35.8 16
 7 -6 0 2.2 16.4
 7 -6 0 5.1 15
 -7 6 0 4.1 23.1
 -7 6 0 5.8 19.4
 -7 6 0 2.2 13.4
 6 -6 0 220.28 23.4
 6 -6 0 244.18 23.9
 6 -6 0 170.58 21.2
 6 -6 0 152.28 21.6
 6 -6 0 174.28 22.9
 6 -6 0 202.68 27.5
 6 -6 0 194.68 25
 6 -6 0 176.78 25.9
 6 -6 0 196.58 28.9
 -6 6 0 227.48 27.8
 -6 6 0 256.87 23.7
 -6 6 0 246.28 31.1
 5 -6 0 80.59 16.3
 5 -6 0 95.39 21.8
 5 -6 0 96.09 15.4
 5 -6 0 91.39 15.3
 5 -6 0 71.49 13.5
 5 -6 0 93.59 16.6
 5 -6 0 88.09 13
 5 -6 0 112.29 27.7
 -5 6 0 89.59 18.8
 -5 6 0 94.39 13.1
 -5 6 0 91.99 15.4
 4 -6 0 22.9 11.3
 4 -6 0 -6.6 10.5
 4 -6 0 24 18.2
 4 -6 0 21.3 11.2
 4 -6 0 38.2 17.3
 4 -6 0 16.9 7.9
 4 -6 0 30.5 8.2
 4 -6 0 13.2 12.8
 -4 6 0 27.2 14
 -4 6 0 33.9 11
 -4 6 0 21.3 11.7
 -4 6 0 15.6 7.3
 3 -6 0 1487.35 91.59
 3 -6 0 1174.68 87.99
 3 -6 0 1384.96 90.89
 3 -6 0 1364.26 88.39
 3 -6 0 1450.25 90.19
 3 -6 0 1423.86 90.49
 3 -6 0 1451.35 95.09
 -3 6 0 1407.06 89.79
 -3 6 0 1435.36 88.79
 -3 6 0 1241.28 89.99
 -3 6 0 1369.36 90.49
 -3 6 0 1450.85 93.89
 2 -6 0 480.85 32.3
 2 -6 0 401.66 27.8
 2 -6 0 373.06 29.5
 2 -6 0 421.26 30.6
 2 -6 0 413.36 31.4
 2 -6 0 420.96 30.8
 2 -6 0 408.56 28.2
 2 -6 0 433.86 29.9
 -2 6 0 445.86 30
 -2 6 0 424.06 33.3
 -2 6 0 425.26 31.2
 -2 6 0 373.66 31.4
 1 -6 0 477.05 34.1
 1 -6 0 483.95 32.3
 1 -6 0 439.56 30.9
 1 -6 0 442.66 31.6
 1 -6 0 498.35 35
 1 -6 0 461.65 33.7
 -1 6 0 487.55 35.3
 -1 6 0 491.35 34.3
 -1 6 0 450.45 34.1
 -1 6 0 477.05 32.5
 0 -6 0 898.61 60.59
 0 -6 0 862.21 57.89
 0 -6 0 922.91 58.89
 0 -6 0 935.61 60.29
 0 -6 0 865.11 59.79
 0 -6 0 911.81 59.19
 0 -6 0 884.51 58.39
 0 -6 0 961.7 59.29
 0 6 0 951.5 59.79
 0 6 0 878.41 60.69
 0 6 0 854.11 59.09
 0 6 0 962 60.99
 -1 -6 0 498.15 34.8
 -1 -6 0 509.55 34.4
 -1 -6 0 507.75 34.3
 -1 -6 0 474.75 32.5
 -1 -6 0 480.05 33.7
 -1 -6 0 476.75 32.8
 1 6 0 465.15 32.7
 1 6 0 466.05 34.3
 1 6 0 482.35 33.5
 1 6 0 519.25 33.6
 1 6 0 489.55 34.1
 1 6 0 487.35 35.1
 1 6 0 455.15 34.6
 1 6 0 459.15 34.6
 -2 -6 0 1282.87 85.99
 -2 -6 0 1251.27 83.59
 -2 -6 0 1280.17 83.79
 -2 -6 0 1278.57 84.89
 -2 -6 0 1355.46 85.09
 -2 -6 0 1260.97 83.29
 -2 -6 0 1310.77 84.99
 -2 -6 0 1305.07 84.29
 -2 -6 0 1338.27 84.79
 2 6 0 1341.97 85.69
 2 6 0 1258.97 84.79
 2 6 0 1267.57 85.09
 2 6 0 1387.46 83.99
 2 6 0 1255.87 83.89
 -3 -6 0 594.34 44.3
 -3 -6 0 607.14 41.3
 -3 -6 0 612.34 42.5
 -3 -6 0 617.34 42.3
 -3 -6 0 622.94 42.7
 -3 -6 0 627.04 41.9
 -3 -6 0 620.04 43
 3 6 0 594.84 43.3
 3 6 0 628.44 41.8
 3 6 0 579.04 41.8
 3 6 0 611.84 43.5
 3 6 0 582.24 44.5
 3 6 0 596.64 39.6
 3 6 0 642.14 42.9
 3 6 0 620.94 42.1
 -4 -6 0 3614.94 226.38
 -4 -6 0 3411.96 225.38
 -4 -6 0 3488.75 225.48
 -4 -6 0 3356.16 226.38
 -4 -6 0 3505.65 226.18
 -4 -6 0 3544.05 225.18
 -4 -6 0 3664.33 225.48
 -4 -6 0 3601.34 225.38
 -4 -6 0 3439.26 225.48
 4 6 0 3595.14 225.18
 4 6 0 3628.84 225.58
 4 6 0 3554.84 226.38
 4 6 0 3456.65 225.78
 4 6 0 3695.53 225.38
 4 6 0 3588.24 226.68
 4 6 0 3530.25 225.08
 4 6 0 3526.85 227.08
 -5 -6 0 15.1 10.5
 -5 -6 0 13.5 9.4
 -5 -6 0 4.2 10.2
 -5 -6 0 10 9
 -5 -6 0 30.5 9.7
 -5 -6 0 6.4 8.3
 -5 -6 0 17.2 9.4
 -5 -6 0 5 7.4
 -5 -6 0 23.6 8.3
 5 6 0 23.9 9.5
 5 6 0 14.3 9.6
 5 6 0 26 12.6
 5 6 0 25.2 10.7
 5 6 0 22.8 9
 5 6 0 15 7.6
 5 6 0 4.3 11.2
 5 6 0 16 8.3
 -6 -6 0 209.28 19.8
 -6 -6 0 224.38 19.4
 -6 -6 0 183.68 23.2
 -6 -6 0 178.48 21
 -6 -6 0 203.38 23.6
 -6 -6 0 193.48 21.2
 -6 -6 0 209.78 22.2
 -6 -6 0 213.98 22.5
 -6 -6 0 194.38 21.2
 6 6 0 185.48 25.1
 6 6 0 217.28 23.1
 6 6 0 201.48 21.5
 6 6 0 193.58 20.3
 6 6 0 205.48 26
 6 6 0 217.28 22.1
 6 6 0 204.88 21.1
 6 6 0 176.28 21.1
 -7 -6 0 135.99 17.9
 -7 -6 0 154.08 20.1
 -7 -6 0 147.89 19.2
 -7 -6 0 164.48 20.6
 -7 -6 0 167.08 22.8
 -7 -6 0 121.09 18
 -7 -6 0 150.28 21.1
 -7 -6 0 142.19 17.8
 -7 -6 0 105.49 18.7
 7 6 0 145.19 15.2
 7 6 0 122.09 18.1
 7 6 0 110.39 17.4
 7 6 0 158.38 24.3
 7 6 0 147.59 19.6
 7 6 0 154.18 22.1
 7 6 0 149.29 19
 7 6 0 143.29 18.9
 7 6 0 152.18 22.1
 -8 -6 0 130.89 19.6
 -8 -6 0 73.09 18.2
 -8 -6 0 118.69 21.1
 -8 -6 0 107.39 19.6
 -8 -6 0 113.99 19.3
 -8 -6 0 114.79 15.8
 -8 -6 0 105.79 16.1
 -8 -6 0 116.19 22.3
 -8 -6 0 94.79 18.4
 8 6 0 136.39 20.4
 8 6 0 100.39 18.8
 8 6 0 127.89 18.8
 8 6 0 136.59 24.7
 8 6 0 81.19 17.8
 8 6 0 123.79 20.7
 8 6 0 77.09 20.5
 8 6 0 120.09 14.2
 8 6 0 109.19 18.7
 -9 -6 0 9.6 17.1
 -9 -6 0 -13 15.2
 -9 -6 0 3.4 13.6
 -9 -6 0 5.3 10.9
 -9 -6 0 8.8 19
 -9 -6 0 -0.6 12.1
 9 6 0 -8.8 11.3
 9 6 0 2.7 16.5
 9 6 0 -26.7 22
 9 6 0 -15.9 13.5
 9 6 0 -13.3 13.2
 9 6 0 -10 14.6
 -10 -6 0 109.09 19.2
 -10 -6 0 84.59 21.3
 -10 -6 0 102.49 24.3
 -10 -6 0 120.19 17.7
 -10 -6 0 79.19 21.7
 10 6 0 106.29 17.9
 10 6 0 123.29 26.7
 10 6 0 113.99 21.5
 10 6 0 66.19 30.7
 10 6 0 132.29 24.3
 10 6 0 139.29 27
 -11 -6 0 464.95 48.9
 -11 -6 0 492.75 42.3
 -11 -6 0 452.15 47
 -11 -6 0 490.95 39
 -11 -6 0 459.75 48.9
 11 6 0 512.45 48.5
 11 6 0 443.26 46.2
 11 6 0 483.15 47.4
 11 6 0 387.66 51.19
 11 6 0 446.36 41.3
 -12 -6 0 8.5 23
 -12 -6 0 -4.5 19.8
 -12 -6 0 5.4 24.5
 -12 -6 0 9.9 16.8
 12 6 0 -10.9 23.9
 12 6 0 -20.7 22.2
 12 6 0 5.9 20.3
 12 6 0 -16.6 26.4
 12 6 0 58.59 27.8
 -13 -6 0 158.48 34.9
 -13 -6 0 125.59 27.5
 -13 -6 0 119.09 34.1
 13 6 0 60.79 31.1
 13 6 0 99.59 35.6
 13 6 0 91.49 27.9
 13 6 0 106.59 30.8
 13 6 0 117.99 35.2
 -14 -6 0 40.2 36.9
 -14 -6 0 18.1 33.3
 -14 -6 0 -25.1 26.7
 14 6 0 25.7 34.6
 14 6 0 14.2 33.1
 14 6 0 34.9 35.8
 14 6 0 -13.4 36.8
 -15 -6 0 17.2 40.2
 -15 -6 0 -30.7 39
 -15 -6 0 30.6 32.1
 15 6 0 -28.9 38.5
 15 6 0 18.3 44.1
 15 6 0 16.2 43.8
 15 6 0 -34.4 35.9
 -16 -6 0 4.3 49.99
 -16 -6 0 116.29 39
 -16 -6 0 46.9 49.8
 16 6 0 54.99 57.69
 16 6 0 81.99 52.69
 16 6 0 24.7 48.8
 16 6 0 99.09 49.9
 -17 -6 0 -0.2 58.59
 -17 -6 0 -12.6 46
 -17 -6 0 -35.7 57.09
 17 6 0 -17.2 57.09
 17 6 0 55.29 70.59
 17 6 0 81.29 58.19
 17 6 0 46 71.39
 13 -7 0 -29.4 72.89
 -13 7 0 -36.1 68.69
 12 -7 0 -17.5 55.09
 -12 7 0 86.39 41.8
 -12 7 0 -29.2 57.39
 11 -7 0 -64.89 47.4
 11 -7 0 -3.1 31.6
 -11 7 0 -28.3 32.1
 -11 7 0 18.4 48.6
 10 -7 0 23.6 26
 10 -7 0 16.7 26.2
 10 -7 0 58.99 40.7
 -10 7 0 86.09 41.5
 -10 7 0 -3.3 25.8
 9 -7 0 27.7 23.1
 9 -7 0 41.3 26.3
 9 -7 0 -7.9 20.2
 9 -7 0 -34.3 36.9
 9 -7 0 -15.4 35.9
 9 -7 0 -33.1 35.1
 9 -7 0 26.4 24.7
 -9 7 0 1.5 21.5
 -9 7 0 -21.1 30.2
 8 -7 0 -2.3 17.9
 8 -7 0 47.5 20.5
 8 -7 0 19.3 30.4
 8 -7 0 -7.8 19.8
 8 -7 0 -3.2 27.1
 8 -7 0 1.1 19.6
 8 -7 0 10.6 18.5
 -8 7 0 -7.8 18
 -8 7 0 17 27.4
 -8 7 0 25.6 20.5
 7 -7 0 33.3 22.1
 7 -7 0 13.3 15.9
 7 -7 0 3.5 17.8
 7 -7 0 -19.3 16.8
 7 -7 0 29.9 25.4
 7 -7 0 8 14.7
 7 -7 0 7.4 16.8
 7 -7 0 10.3 20.4
 -7 7 0 23.5 15.8
 -7 7 0 -10 22.6
 -7 7 0 3.8 14.8
 6 -7 0 -2.7 15.3
 6 -7 0 9.6 11.5
 6 -7 0 -8.8 16.5
 6 -7 0 17.6 14.8
 6 -7 0 -10.4 12.8
 6 -7 0 19.3 16.9
 6 -7 0 2.9 22.5
 6 -7 0 -25.2 13.4
 -6 7 0 8 11.5
 -6 7 0 -12.3 13.2
 -6 7 0 1 18.1
 5 -7 0 -13 13.3
 5 -7 0 -0.5 11.1
 5 -7 0 7 12.6
 5 -7 0 3.9 14.2
 5 -7 0 44.8 20.4
 5 -7 0 0.2 9.6
 5 -7 0 9.6 28.2
 5 -7 0 20.9 11.2
 -5 7 0 -1.7 8.7
 -5 7 0 8.6 12.1
 -5 7 0 -9.3 14.8
 -5 7 0 11.2 14.9
 4 -7 0 -9.5 11.3
 4 -7 0 -12.4 11
 4 -7 0 -0.3 7.9
 4 -7 0 -11.1 9.1
 4 -7 0 0.2 15.4
 4 -7 0 10.2 18.2
 4 -7 0 7.3 12.9
 -4 7 0 -6.9 11.4
 -4 7 0 -7.3 11.5
 -4 7 0 4.4 14
 -4 7 0 -9.4 7.2
 3 -7 0 19.5 12.3
 3 -7 0 1 11
 3 -7 0 14.9 9.6
 3 -7 0 0.4 8.5
 3 -7 0 -5.6 9.4
 3 -7 0 -4.9 6.3
 -3 7 0 5.2 13
 -3 7 0 18.9 11.8
 -3 7 0 5.7 5.7
 -3 7 0 -4.3 9.2
 -3 7 0 -4.8 11.7
 2 -7 0 0.3 7.7
 2 -7 0 13.9 9.1
 2 -7 0 6.9 7.9
 2 -7 0 -11.5 10.5
 2 -7 0 -1.6 5.1
 2 -7 0 -7 5.6
 2 -7 0 4.8 10.1
 2 -7 0 6.9 8.6
 -2 7 0 2.4 11.3
 -2 7 0 -7.4 10.7
 -2 7 0 -7 7.8
 1 -7 0 1.2 7
 1 -7 0 3.8 6.2
 1 -7 0 7.2 5.6
 1 -7 0 2.6 7.5
 1 -7 0 0 6.6
 1 -7 0 3.8 10.6
 1 -7 0 18.3 10
 1 -7 0 1.8 4.7
 -1 7 0 -4 7.6
 -1 7 0 9.6 9.7
 -1 7 0 4.9 9.9
 -1 7 0 -7.9 8.3
 0 -7 0 3.6 6.5
 0 -7 0 9.5 8
 0 -7 0 5.4 9.8
 0 -7 0 5.8 4.1
 0 -7 0 16.1 6
 0 -7 0 13.7 8.9
 0 -7 0 24.8 8.7
 0 -7 0 13.5 3.9
 0 -7 0 10 5
 0 7 0 3.4 9.7
 0 7 0 7.5 8.4
 0 7 0 9.1 7.7
 0 7 0 12.3 9.2
 0 7 0 10.9 6.8
 0 7 0 19.1 9.3
 -1 -7 0 -13.3 6.4
 -1 -7 0 -8.4 7.2
 -1 -7 0 6.8 4.9
 -1 -7 0 -2.8 7
 -1 -7 0 -7 5.2
 -1 -7 0 -5.6 8
 -1 -7 0 -3 7.6
 1 7 0 -1.4 6.3
 1 7 0 6.2 8.5
 1 7 0 -2.2 9.1
 1 7 0 3.1 5.6
 1 7 0 -5.9 7.7
 -2 -7 0 -5 7.7
 -2 -7 0 3 5
 -2 -7 0 -13.3 7.5
 -2 -7 0 6.4 5.9
 -2 -7 0 1.2 7
 -2 -7 0 -4.9 5.9
 -2 -7 0 1.7 8.4
 -2 -7 0 10.3 11.5
 -2 -7 0 6.6 7.9
 2 7 0 -2.6 8.6
 2 7 0 -3.6 7.2
 2 7 0 5.6 8.7
 2 7 0 -4.9 6.3
 2 7 0 0 6.3
 2 7 0 3.1 8
 2 7 0 -9.8 6.1
 2 7 0 1.7 4.9
 -3 -7 0 -11.2 8.4
 -3 -7 0 -4.7 8.7
 -3 -7 0 -8.1 5.5
 -3 -7 0 -2.8 6.4
 -3 -7 0 -0.9 6.2
 -3 -7 0 -7.5 8.8
 -3 -7 0 -17 10
 3 7 0 -18 7.3
 3 7 0 -11.6 6.5
 3 7 0 -15.4 6.9
 3 7 0 -12 9.7
 3 7 0 -13.4 9
 3 7 0 0 7.6
 -4 -7 0 -5.6 8.2
 -4 -7 0 6.8 9.8
 -4 -7 0 4.5 9.5
 -4 -7 0 -7.2 8
 -4 -7 0 13.2 9.8
 -4 -7 0 -7.2 7.8
 -4 -7 0 12.7 10.6
 -4 -7 0 -5.8 7.1
 -4 -7 0 2.2 6.2
 4 7 0 5.2 8.6
 4 7 0 4.8 8
 4 7 0 -0.6 12.3
 4 7 0 -1.7 6.6
 4 7 0 -11.9 10.7
 4 7 0 -9.7 7.6
 4 7 0 -6.3 7.3
 4 7 0 -4.1 9.4
 -5 -7 0 -8 9.4
 -5 -7 0 4.1 7.8
 -5 -7 0 3.8 11.3
 -5 -7 0 -5.4 9.5
 -5 -7 0 -27 11.7
 -5 -7 0 -1.7 9.4
 -5 -7 0 1.6 9.9
 -5 -7 0 -1.2 7.7
 5 7 0 -4.6 12.1
 5 7 0 -0.5 8
 5 7 0 -0.9 8.8
 5 7 0 -19.1 10.8
 5 7 0 1.4 8.7
 5 7 0 6.7 9.2
 5 7 0 -4.6 9.1
 5 7 0 7.9 12.9
 -6 -7 0 -2.3 11
 -6 -7 0 7.6 9.1
 -6 -7 0 -3.6 10.1
 -6 -7 0 10.8 12.3
 -6 -7 0 9.1 10.6
 -6 -7 0 7 8.8
 -6 -7 0 21.5 13.6
 -6 -7 0 8.9 10.6
 -6 -7 0 5.8 11.1
 6 7 0 -6.3 14.5
 6 7 0 -2.8 9.5
 6 7 0 -9 9.4
 6 7 0 -2.3 10.2
 6 7 0 20.6 10.9
 6 7 0 10.1 13.1
 6 7 0 -4.8 9.7
 6 7 0 13.4 14.6
 -7 -7 0 2.7 10.6
 -7 -7 0 -0.4 12.7
 -7 -7 0 27.5 11.5
 -7 -7 0 -5 10.2
 -7 -7 0 -12.6 14.8
 -7 -7 0 18.8 14.2
 -7 -7 0 -6.2 11.8
 -7 -7 0 -2.2 12.1
 -7 -7 0 -0.9 16.1
 7 7 0 17.5 18.3
 7 7 0 7.7 12.1
 7 7 0 23.3 13.7
 7 7 0 5.9 11.6
 7 7 0 23.3 13
 7 7 0 9.3 14.3
 7 7 0 0.6 11.5
 7 7 0 5.2 13.6
 -8 -7 0 -14.4 15.4
 -8 -7 0 4.6 11.5
 -8 -7 0 16.1 11.5
 -8 -7 0 -6 18.7
 -8 -7 0 -10.1 18.3
 -8 -7 0 6.4 13.8
 -8 -7 0 11.6 14.9
 -8 -7 0 -17.7 10.8
 -8 -7 0 -6.8 17.4
 8 7 0 12.1 13.4
 8 7 0 8.3 15.9
 8 7 0 9.6 13.5
 8 7 0 12.6 16.6
 8 7 0 -0.9 14.4
 8 7 0 10.5 20.1
 8 7 0 7.9 15.6
 8 7 0 -9.9 14.9
 8 7 0 -5.4 12.7
 -9 -7 0 -21.5 14
 -9 -7 0 1.9 16.5
 -9 -7 0 -4.4 14.9
 -9 -7 0 -9 11.6
 -9 -7 0 -1.4 12.8
 9 7 0 18.8 19.6
 9 7 0 -39.1 28.3
 9 7 0 6 11.1
 9 7 0 -22.7 14.7
 9 7 0 5.5 19.4
 9 7 0 15.2 15.1
 -10 -7 0 18.1 18.1
 -10 -7 0 5.3 18.4
 -10 -7 0 23.8 13.4
 -10 -7 0 -8.3 14.6
 -10 -7 0 -12 17.7
 10 7 0 -10 19.7
 10 7 0 3.2 13.2
 10 7 0 -2.1 17.4
 10 7 0 42.1 23
 10 7 0 -3.4 17.6
 -11 -7 0 -12.5 15.2
 -11 -7 0 28.4 18
 -11 -7 0 -8 22.9
 -11 -7 0 24.3 22.9
 -11 -7 0 3.3 20.6
 11 7 0 -23.6 20.4
 11 7 0 28 24.5
 11 7 0 27.2 17.1
 11 7 0 5.6 21.4
 11 7 0 -17.3 19.4
 -12 -7 0 17.3 25.8
 -12 -7 0 13.5 18.8
 -12 -7 0 27.6 25.8
 -12 -7 0 -45.6 19.7
 12 7 0 -22.1 25.5
 12 7 0 1.1 20.3
 12 7 0 -44.6 26.6
 12 7 0 -6.3 24.5
 12 7 0 -18.8 23.2
 -13 -7 0 26.1 25.2
 -13 -7 0 8.8 21.3
 -13 -7 0 -1.3 29
 -13 -7 0 -2 28.4
 13 7 0 13.7 31.1
 13 7 0 0 32.6
 13 7 0 -22.3 31.9
 13 7 0 -26 29.8
 -14 -7 0 26.7 28.2
 -14 -7 0 -38.5 33.6
 -14 -7 0 -28 37.5
 14 7 0 28.2 37.1
 14 7 0 -33.7 38.6
 14 7 0 -23.5 35.6
 14 7 0 -75.79 34.4
 -15 -7 0 -50.59 41
 -15 -7 0 25 34.2
 -15 -7 0 -70.49 42.5
 15 7 0 -2.8 45.2
 15 7 0 49.1 48.1
 15 7 0 -11.6 39.8
 15 7 0 26.9 42.2
 -16 -7 0 -61.99 47.2
 -16 -7 0 -37 38.4
 -16 -7 0 -39.9 51.19
 16 7 0 -25.6 47
 16 7 0 4.9 49.8
 16 7 0 -8.7 50.59
 16 7 0 -31.2 55.69
 -17 -7 0 0.3 60.19
 -17 -7 0 40.3 46.8
 -17 -7 0 -38.8 60.69
 17 7 0 34.2 61.79
 17 7 0 11.6 67.19
 17 7 0 -103.29 56.49
 17 7 0 -33.9 58.79
 12 -8 0 -6.4 65.99
 -12 8 0 104.19 69.09
 11 -8 0 -36.5 54.19
 -11 8 0 31.3 37
 -11 8 0 118.59 59.59
 10 -8 0 127.19 33.7
 10 -8 0 170.88 50.79
 -10 8 0 132.49 33
 -10 8 0 233.88 52.99
 9 -8 0 77.89 43.7
 9 -8 0 -17.1 24.8
 -9 8 0 -11 21.7
 -9 8 0 48 36.7
 8 -8 0 -20.7 18.5
 8 -8 0 9.1 22.8
 8 -8 0 -34.5 30.7
 8 -8 0 2.2 31.7
 8 -8 0 25 27.9
 8 -8 0 -18.4 23.1
 8 -8 0 28.2 22.5
 8 -8 0 3.8 20.9
 -8 8 0 -27.9 17.5
 -8 8 0 31 32
 7 -8 0 46.9 23.5
 7 -8 0 31.8 20.4
 7 -8 0 11.9 28.4
 7 -8 0 16.4 26
 7 -8 0 -7.5 19
 7 -8 0 -17.2 20.6
 7 -8 0 -7.4 18.7
 7 -8 0 24.6 15.9
 -7 8 0 34.5 17
 -7 8 0 21.1 16.3
 -7 8 0 48.6 24.2
 -7 8 0 -0.3 25.1
 6 -8 0 57.29 14.2
 6 -8 0 49.2 27.9
 6 -8 0 26.6 18.9
 6 -8 0 49.1 17.1
 6 -8 0 47 19.3
 6 -8 0 53.59 16.6
 6 -8 0 46.5 21.2
 -6 8 0 42.1 14
 -6 8 0 63.69 20.1
 -6 8 0 23.2 14.9
 -6 8 0 38.8 22.1
 5 -8 0 31.6 11.6
 5 -8 0 34.1 15.3
 5 -8 0 19.7 12.7
 5 -8 0 -2.4 16.1
 5 -8 0 20.4 24
 5 -8 0 4.3 20.6
 5 -8 0 8.6 13.8
 5 -8 0 16.5 18
 -5 8 0 18.2 10.4
 -5 8 0 40.3 20.2
 -5 8 0 25.6 13.6
 -5 8 0 17.8 15.5
 4 -8 0 35.6 21.3
 4 -8 0 42.6 14.4
 4 -8 0 5.9 15.8
 4 -8 0 46.8 13.6
 4 -8 0 27.1 10.3
 4 -8 0 44.4 16.3
 -4 8 0 12.8 13.8
 -4 8 0 20.5 17.4
 -4 8 0 26.8 8.8
 -4 8 0 42.2 12.9
 3 -8 0 667.83 47.9
 3 -8 0 641.94 49.4
 3 -8 0 653.73 48.4
 3 -8 0 641.24 45.5
 3 -8 0 669.63 46.9
 3 -8 0 626.74 43.5
 -3 8 0 651.23 50.99
 -3 8 0 591.84 46.6
 -3 8 0 612.94 48.7
 -3 8 0 650.23 45
 2 -8 0 2.7 13.1
 2 -8 0 -5.6 10.1
 2 -8 0 -3.1 6.4
 2 -8 0 -3.9 12.6
 2 -8 0 1.6 8.4
 2 -8 0 -5 12.6
 2 -8 0 9.5 6.5
 2 -8 0 13.6 9.1
 2 -8 0 -13.6 11.7
 -2 8 0 -12.7 11.5
 -2 8 0 12.9 13.4
 -2 8 0 -13.3 8.7
 1 -8 0 119.39 14.7
 1 -8 0 163.08 20.4
 1 -8 0 185.68 20
 1 -8 0 139.09 19.6
 1 -8 0 155.88 14.7
 1 -8 0 144.99 15.3
 1 -8 0 136.69 18.9
 1 -8 0 133.49 13.4
 -1 8 0 150.08 19.4
 -1 8 0 158.18 21.2
 -1 8 0 146.69 17.3
 0 -8 0 249.18 21.5
 0 -8 0 213.18 17.3
 0 -8 0 210.68 21.8
 0 -8 0 223.58 18.6
 0 -8 0 189.38 21.2
 0 -8 0 224.98 19.3
 0 -8 0 194.48 14.9
 0 -8 0 171.08 15.3
 0 -8 0 225.98 24.1
 0 -8 0 208.58 16.7
 0 8 0 154.68 21.2
 0 8 0 195.88 22.1
 0 8 0 215.38 20.4
 0 8 0 184.18 23
 0 8 0 206.78 18.4
 -1 -8 0 604.84 43.9
 -1 -8 0 612.54 42.7
 -1 -8 0 673.53 44.1
 -1 -8 0 611.94 41.4
 -1 -8 0 627.74 44.3
 -1 -8 0 628.44 42.6
 -1 -8 0 619.74 41.3
 1 8 0 596.64 44.9
 1 8 0 623.94 44.4
 1 8 0 562.54 44.1
 1 8 0 542.95 42.8
 1 8 0 610.64 43.6
 1 8 0 596.94 40.5
 -2 -8 0 586.54 46.1
 -2 -8 0 600.84 40
 -2 -8 0 582.14 43.1
 -2 -8 0 572.44 40.9
 -2 -8 0 598.04 42.5
 -2 -8 0 579.04 41.7
 -2 -8 0 590.24 42.7
 -2 -8 0 589.44 43
 -2 -8 0 602.04 40.7
 2 8 0 568.94 44.1
 2 8 0 585.14 44
 2 8 0 582.34 43.3
 2 8 0 581.24 40.9
 2 8 0 597.94 43.7
 2 8 0 604.64 42
 2 8 0 619.54 41
 2 8 0 598.94 40.6
 -3 -8 0 239.08 23.7
 -3 -8 0 265.27 20.4
 -3 -8 0 264.97 21.1
 -3 -8 0 253.07 30.3
 -3 -8 0 223.68 24.2
 -3 -8 0 227.08 27.9
 -3 -8 0 237.08 22.2
 -3 -8 0 259.57 23.6
 3 8 0 262.17 21.3
 3 8 0 258.07 22.8
 3 8 0 236.78 23.9
 3 8 0 225.28 24.4
 3 8 0 242.38 24.6
 -4 -8 0 137.09 17.6
 -4 -8 0 123.59 15.9
 -4 -8 0 116.09 14.1
 -4 -8 0 134.89 17.5
 -4 -8 0 135.99 17.3
 -4 -8 0 83.29 15.3
 -4 -8 0 102.59 14.7
 -4 -8 0 94.39 13.7
 -4 -8 0 84.09 18.2
 4 8 0 94.89 17.7
 4 8 0 94.69 14.7
 4 8 0 124.89 19.6
 4 8 0 90.49 9.9
 4 8 0 100.39 9.7
 4 8 0 125.39 17.5
 4 8 0 104.09 14.6
 4 8 0 104.79 14.2
 4 8 0 97.49 14.3
 -5 -8 0 6.5 10.1
 -5 -8 0 2.6 11.2
 -5 -8 0 -13.6 10
 -5 -8 0 -5.3 9.1
 -5 -8 0 -3.7 7.7
 -5 -8 0 0.9 8.3
 -5 -8 0 -5 12.4
 -5 -8 0 12.5 10.1
 -5 -8 0 -5.2 12.2
 5 8 0 7.2 13.6
 5 8 0 9.3 10.3
 5 8 0 -11.9 8.5
 5 8 0 1.4 10.3
 5 8 0 -13.4 12.4
 5 8 0 -8 9.6
 5 8 0 -34.1 13
 5 8 0 2 9.9
 5 8 0 7.2 6.6
 -6 -8 0 50.29 16.1
 -6 -8 0 77.29 15.1
 -6 -8 0 49.3 14.5
 -6 -8 0 38.1 17.3
 -6 -8 0 86.89 14.1
 -6 -8 0 68.09 14.4
 -6 -8 0 84.29 14.3
 -6 -8 0 56.49 15.9
 -6 -8 0 44.5 12.6
 6 8 0 65.09 13.6
 6 8 0 82.89 16.5
 6 8 0 77.49 20
 6 8 0 53.49 14.3
 6 8 0 73.49 17.4
 6 8 0 62.99 11
 6 8 0 90.79 20.3
 6 8 0 66.69 14.6
 6 8 0 45.9 13.4
 -7 -8 0 263.97 31.7
 -7 -8 0 300.27 33
 -7 -8 0 355.46 28.4
 -7 -8 0 336.47 31
 -7 -8 0 323.47 30.8
 -7 -8 0 277.97 32.7
 -7 -8 0 306.57 28.5
 -7 -8 0 242.88 32
 -7 -8 0 291.87 30.2
 7 8 0 333.47 29.5
 7 8 0 293.77 30
 7 8 0 315.97 30.6
 7 8 0 295.87 31
 7 8 0 265.27 29.8
 7 8 0 324.47 38.1
 7 8 0 311.97 34.1
 7 8 0 308.27 34.7
 -8 -8 0 96.59 16.9
 -8 -8 0 92.69 18.8
 -8 -8 0 104.99 16.7
 -8 -8 0 79.89 21.7
 -8 -8 0 81.69 20.5
 -8 -8 0 113.09 19.9
 8 8 0 82.99 18.6
 8 8 0 81.49 22.1
 8 8 0 92.99 19.7
 8 8 0 152.58 25.8
 8 8 0 108.99 19.1
 -9 -8 0 107.19 22.7
 -9 -8 0 90.29 22.1
 -9 -8 0 105.19 18.8
 -9 -8 0 89.39 21
 -9 -8 0 105.09 19.3
 9 8 0 71.99 25
 9 8 0 115.59 22.3
 9 8 0 104.99 21.5
 9 8 0 108.19 15.2
 9 8 0 105.99 25.4
 -10 -8 0 33.9 15.8
 -10 -8 0 9.7 20.5
 -10 -8 0 19.1 21
 -10 -8 0 40.5 20.8
 -10 -8 0 21.3 16.3
 10 8 0 -24.6 21.4
 10 8 0 29.4 13.7
 10 8 0 25.6 19.8
 10 8 0 27.4 22.6
 10 8 0 22.1 20.2
 -11 -8 0 95.69 22.7
 -11 -8 0 116.49 28.4
 -11 -8 0 86.99 19.6
 -11 -8 0 124.49 28.9
 -11 -8 0 86.19 27.6
 11 8 0 66.59 24.4
 11 8 0 75.89 30.6
 11 8 0 77.49 25.7
 11 8 0 98.59 29.8
 11 8 0 66.49 17.9
 -12 -8 0 8.2 22.4
 -12 -8 0 52.49 26.2
 -12 -8 0 64.19 21.1
 -12 -8 0 15.3 26.4
 -12 -8 0 70.49 32
 12 8 0 81.69 29
 12 8 0 34.7 31.2
 12 8 0 32.6 28
 12 8 0 76.29 30.4
 12 8 0 38 20.1
 -13 -8 0 145.59 43.3
 -13 -8 0 188.18 29.3
 -13 -8 0 115.79 37
 13 8 0 123.49 41.3
 13 8 0 209.28 41.5
 13 8 0 106.39 36.2
 13 8 0 99.49 38.8
 -14 -8 0 63.89 32.3
 -14 -8 0 49.3 30.9
 -14 -8 0 37.1 41.2
 -14 -8 0 75.79 69.49
 14 8 0 11.2 33.4
 14 8 0 43.3 36.4
 14 8 0 -40.9 39.6
 14 8 0 85.89 38.4
 -15 -8 0 42.8 50.19
 -15 -8 0 -22.2 40.5
 -15 -8 0 78.69 35.3
 15 8 0 -13 43
 15 8 0 65.29 47.8
 15 8 0 -5.3 41.2
 15 8 0 -6.6 41.5
 -16 -8 0 83.49 58.39
 -16 -8 0 -4.7 39.5
 -16 -8 0 10.4 51.29
 16 8 0 69.39 51.69
 16 8 0 16.9 52.19
 16 8 0 189.68 61.89
 16 8 0 45.4 49.6
 -17 -8 0 22.8 48
 -17 -8 0 31.3 71.89
 17 8 0 -46.9 57.59
 17 8 0 158.78 63.29
 17 8 0 131.99 69.49
 17 8 0 122.69 65.39
 11 -9 0 37.4 62.69
 -11 9 0 172.88 70.59
 10 -9 0 0.2 51.09
 -10 9 0 44.9 53.59
 9 -9 0 26.6 28.9
 9 -9 0 8.8 38.4
 9 -9 0 -2.3 32.3
 9 -9 0 16.4 43.2
 -9 9 0 13 25
 -9 9 0 18.2 46.9
 8 -9 0 -7 28.1
 8 -9 0 10.2 25.2
 8 -9 0 -30.2 30.5
 -8 9 0 17.6 34.4
 -8 9 0 -3.5 21.4
 7 -9 0 0.3 20.6
 7 -9 0 -27.6 16
 7 -9 0 28.5 22.9
 7 -9 0 -27 23
 7 -9 0 8.8 26.2
 7 -9 0 -6.6 23
 7 -9 0 -37.6 24.4
 7 -9 0 12 33
 -7 9 0 35.3 18.2
 -7 9 0 0.7 22.4
 -7 9 0 -0.4 29.5
 6 -9 0 -5.9 22.3
 6 -9 0 10.1 18.6
 6 -9 0 -2.1 18
 6 -9 0 8.9 19
 6 -9 0 -1.1 18.6
 6 -9 0 71.79 23.1
 6 -9 0 -44.4 29.5
 6 -9 0 -2.5 14.2
 -6 9 0 -7.4 23.8
 -6 9 0 21.4 18.2
 5 -9 0 8.2 12.1
 5 -9 0 6.5 20.2
 5 -9 0 21.6 16.9
 5 -9 0 40.8 18.9
 5 -9 0 -19 16.2
 5 -9 0 -6.6 13.7
 5 -9 0 11.8 20.2
 5 -9 0 20.3 25.7
 5 -9 0 0.2 22.6
 -5 9 0 -3.7 17.4
 -5 9 0 9 20.3
 -5 9 0 -16.4 14.5
 4 -9 0 -1.7 18.7
 4 -9 0 15.2 15
 4 -9 0 -1.6 25
 4 -9 0 -7.1 14.1
 4 -9 0 -7.7 14.4
 4 -9 0 -14.6 16.5
 4 -9 0 19.5 11.7
 4 -9 0 7.5 13.3
 -4 9 0 -6.9 14.5
 -4 9 0 -17.9 17.6
 -4 9 0 -19.2 12.4
 3 -9 0 -0.5 16.7
 3 -9 0 11.6 14.4
 3 -9 0 -10.9 11
 3 -9 0 -18.5 11.1
 3 -9 0 -7.7 14.4
 3 -9 0 -4.7 9.1
 3 -9 0 -16.6 13.4
 -3 9 0 -2 11.3
 -3 9 0 -25.8 16.4
 -3 9 0 6.5 15.6
 -3 9 0 2.2 15.8
 2 -9 0 -15.3 14.6
 2 -9 0 6.4 8.1
 2 -9 0 -26.2 15.7
 2 -9 0 -14.5 11.3
 2 -9 0 -17.2 10.3
 2 -9 0 -10.1 11.4
 2 -9 0 -5 9.2
 2 -9 0 9.6 13.3
 -2 9 0 7.3 11
 -2 9 0 -6.3 14.7
 -2 9 0 4.4 15.1
 1 -9 0 -3.6 14.4
 1 -9 0 2.8 8.1
 1 -9 0 9.2 10.2
 1 -9 0 6.8 8.6
 1 -9 0 6.1 7.9
 1 -9 0 9.8 14.2
 1 -9 0 4.5 7.3
 1 -9 0 6.9 14.7
 1 -9 0 13.6 12.5
 1 -9 0 -1.7 6.5
 -1 9 0 -4.1 10.7
 -1 9 0 -2.1 12.8
 -1 9 0 0.6 13.6
 -1 9 0 12.4 13.5
 0 -9 0 4.3 8.8
 0 -9 0 -8.1 11.5
 0 -9 0 -1.6 8.2
 0 -9 0 -12.4 7.5
 0 -9 0 16 12.3
 0 -9 0 16 10.1
 0 -9 0 5.8 12.3
 0 -9 0 7.6 15.3
 0 9 0 8.7 12.8
 0 9 0 -14 11.2
 0 9 0 -7.2 12.4
 0 9 0 -18.1 11.3
 -1 -9 0 -9.9 11
 -1 -9 0 -4 10.9
 -1 -9 0 6.9 9.4
 -1 -9 0 5.4 9.9
 -1 -9 0 -13.8 7.2
 -1 -9 0 -21.3 14.4
 -1 -9 0 8 8.1
 -1 -9 0 -2.3 11.2
 1 9 0 -3.4 11.3
 1 9 0 -15.1 11.7
 1 9 0 1.2 10.4
 1 9 0 8.9 9.4
 -2 -9 0 5.3 8
 -2 -9 0 21.3 15.2
 -2 -9 0 8 11.8
 -2 -9 0 -22.5 10.8
 -2 -9 0 -9.6 10.9
 -2 -9 0 -11.8 9.4
 2 9 0 12.6 10.6
 2 9 0 -6.7 13.9
 2 9 0 -2.3 8.5
 2 9 0 -8.9 10
 2 9 0 -6.8 8.9
 2 9 0 -2.3 12.1
 2 9 0 -28.9 11.8
 -3 -9 0 -0.8 8
 -3 -9 0 12.9 9.2
 -3 -9 0 -5.9 10.3
 -3 -9 0 -8.3 9.2
 -3 -9 0 -15.6 12.6
 -3 -9 0 -5.5 11.3
 -3 -9 0 -5 11.4
 -3 -9 0 4.1 14.4
 -3 -9 0 -5.7 7.1
 3 9 0 -7.1 10.2
 3 9 0 -11.1 8.7
 3 9 0 -19.6 12.7
 3 9 0 6.6 9.6
 3 9 0 -6.2 13.8
 3 9 0 1.7 10.7
 3 9 0 -16 13.5
 -4 -9 0 -3.1 11.9
 -4 -9 0 -19.7 15
 -4 -9 0 -13.6 12.9
 -4 -9 0 -7.2 12
 -4 -9 0 4.2 9.1
 -4 -9 0 -1.2 10.5
 -4 -9 0 10.8 10.1
 -4 -9 0 -1.4 8
 -4 -9 0 -1.6 10.2
 4 9 0 51.69 27.3
 4 9 0 10.1 11.1
 4 9 0 -4.5 8.1
 4 9 0 -13.1 10.4
 4 9 0 25.7 10.6
 4 9 0 -6.4 10.9
 4 9 0 -14.6 14.4
 -5 -9 0 14.1 12.8
 -5 -9 0 14 11.8
 -5 -9 0 5.5 16.2
 -5 -9 0 4.8 12.2
 -5 -9 0 1 11.6
 -5 -9 0 -8.8 14.1
 -5 -9 0 2.4 9.9
 -5 -9 0 -18.4 9.5
 -5 -9 0 13.2 12.7
 5 9 0 -28.8 11
 5 9 0 7.8 16.1
 5 9 0 -2.2 15.1
 5 9 0 4 11.7
 5 9 0 -13.4 9.4
 5 9 0 9.6 6
 5 9 0 -14.2 11.4
 5 9 0 -7.4 10.5
 5 9 0 -4.8 8
 -6 -9 0 -34.1 13.6
 -6 -9 0 3.4 11.1
 -6 -9 0 7.4 17.5
 -6 -9 0 -7 10.3
 -6 -9 0 -12.8 15.1
 -6 -9 0 -8.4 12.5
 -6 -9 0 -16.1 12.4
 -6 -9 0 2.7 10.8
 -6 -9 0 8.7 15.9
 6 9 0 9.3 13.3
 6 9 0 -12.9 18.7
 6 9 0 -15.4 11.4
 6 9 0 3 11.5
 6 9 0 -19 12.3
 6 9 0 -7.5 16.2
 6 9 0 -7.4 15.7
 6 9 0 -1.9 12.1
 6 9 0 -8.8 8.3
 -7 -9 0 2.5 14.4
 -7 -9 0 6.4 13.2
 -7 -9 0 -8.2 12.7
 -7 -9 0 -15.3 17.1
 -7 -9 0 -14.5 11
 -7 -9 0 -10.5 12
 7 9 0 -11.3 13
 7 9 0 4.3 10.1
 7 9 0 8 13.5
 7 9 0 7.7 13.8
 7 9 0 -11.9 15.7
 7 9 0 -5.1 17
 7 9 0 -34.3 16.8
 7 9 0 -1.2 15.2
 -8 -9 0 13.1 21.5
 -8 -9 0 -16.7 12.6
 -8 -9 0 -15.6 12.2
 -8 -9 0 -5.3 16.6
 -8 -9 0 10.4 17
 -8 -9 0 20 14.5
 8 9 0 -0.1 15.9
 8 9 0 -10.3 18.8
 8 9 0 13.4 12.4
 8 9 0 5 18.7
 8 9 0 -7.1 14
 8 9 0 1.8 15.9
 -9 -9 0 -8.4 14
 -9 -9 0 3.9 17.6
 -9 -9 0 9.3 17.9
 -9 -9 0 -2.5 14.7
 -9 -9 0 -2.2 18
 9 9 0 52.19 19.5
 9 9 0 5.3 22.2
 9 9 0 23.8 24
 9 9 0 0.3 15.8
 9 9 0 9.9 17.9
 -10 -9 0 17.2 20
 -10 -9 0 -22.4 19.3
 -10 -9 0 22.3 22
 -10 -9 0 13.3 16.7
 -10 -9 0 10.9 17
 10 9 0 -32.6 24.9
 10 9 0 22.8 19.4
 10 9 0 11.6 22.5
 10 9 0 28 21.6
 10 9 0 -28.4 18.8
 10 9 0 -9.5 13.1
 -11 -9 0 31.2 27.7
 -11 -9 0 -12.3 22.7
 -11 -9 0 -14.5 19.7
 -11 -9 0 32.6 27.1
 -11 -9 0 27.8 20.1
 11 9 0 -1.9 27
 11 9 0 -25.7 22.8
 11 9 0 -27.2 23.9
 11 9 0 22.9 15.8
 11 9 0 11.4 25.3
 -12 -9 0 -3.9 24.8
 -12 -9 0 2.8 24.7
 -12 -9 0 35 32
 -12 -9 0 -4.9 22
 12 9 0 46.7 28.1
 12 9 0 -1.7 33.5
 12 9 0 7.7 18.2
 -13 -9 0 1.5 27
 -13 -9 0 39.8 38
 -13 -9 0 10.9 25.6
 13 9 0 -9.9 31.6
 13 9 0 15 38.7
 13 9 0 -25.6 36.6
 13 9 0 -46.2 30.6
 -14 -9 0 -15.3 30.8
 -14 -9 0 -17.3 35.9
 -14 -9 0 51.99 44.8
 -14 -9 0 53.49 31.9
 14 9 0 1.5 51.79
 14 9 0 -30 36
 14 9 0 55.99 45.3
 14 9 0 -36.1 47
 -15 -9 0 -71.19 52.09
 -15 -9 0 -9.1 36.1
 -15 -9 0 -61.09 40.1
 15 9 0 28.6 49.6
 15 9 0 2.5 48.6
 15 9 0 74.49 48.4
 15 9 0 -8.4 42.5
 -16 -9 0 20.6 65.69
 -16 -9 0 -16.9 41.6
 -16 -9 0 16.7 51.29
 16 9 0 39.9 54.19
 16 9 0 -14.1 58.09
 16 9 0 -24 51.69
 16 9 0 -59.89 52.39
 10 -10 0 1.2 62.99
 -10 10 0 108.79 68.09
 9 -10 0 -0.7 49.99
 -9 10 0 38.6 51.49
 8 -10 0 44.8 39.5
 8 -10 0 68.09 45.4
 8 -10 0 29.2 36.8
 8 -10 0 54.89 29.7
 -8 10 0 17.3 38.6
 7 -10 0 103.19 27
 7 -10 0 149.49 28.9
 7 -10 0 140.19 34.6
 -7 10 0 115.19 35.5
 -7 10 0 106.89 25.3
 6 -10 0 -8.8 19.6
 6 -10 0 21 25.7
 6 -10 0 -19.3 21.2
 6 -10 0 -9.4 32.8
 6 -10 0 -20.5 21.6
 6 -10 0 18.8 22.7
 6 -10 0 10.3 31
 -6 10 0 -35.9 36.4
 5 -10 0 45.2 27.1
 5 -10 0 91.79 23.8
 5 -10 0 61.99 19.3
 5 -10 0 62.69 32.7
 5 -10 0 127.09 21.9
 5 -10 0 92.39 15.3
 5 -10 0 20.4 20.9
 5 -10 0 63.19 21.8
 5 -10 0 88.39 26.6
 -5 10 0 46.4 26.1
 4 -10 0 75.99 24.9
 4 -10 0 51.09 19.3
 4 -10 0 50.59 19.3
 4 -10 0 35.3 18.9
 4 -10 0 71.29 16.3
 4 -10 0 75.09 23
 4 -10 0 40.8 27.7
 4 -10 0 68.19 25.4
 -4 10 0 60.09 15.1
 -4 10 0 67.29 24.9
 -4 10 0 54.39 20.6
 3 -10 0 96.99 20.2
 3 -10 0 94.29 25.3
 3 -10 0 161.78 20.1
 3 -10 0 101.19 29.5
 3 -10 0 85.99 17.6
 3 -10 0 115.49 15.2
 3 -10 0 103.09 15.2
 -3 10 0 90.69 23.1
 -3 10 0 103.69 21.1
 -3 10 0 101.39 16.5
 -3 10 0 93.19 24.4
 2 -10 0 100.49 20.8
 2 -10 0 78.59 12.4
 2 -10 0 64.79 22.5
 2 -10 0 78.79 12.9
 2 -10 0 83.99 18.6
 2 -10 0 101.49 14.5
 2 -10 0 141.39 17.9
 2 -10 0 89.99 19.6
 -2 10 0 45.8 20.7
 -2 10 0 88.09 22
 -2 10 0 83.59 15.9
 1 -10 0 214.28 27.8
 1 -10 0 234.48 28.8
 1 -10 0 216.48 20
 1 -10 0 186.38 23
 1 -10 0 177.98 20
 1 -10 0 174.88 22.8
 1 -10 0 231.48 20
 1 -10 0 200.18 24.3
 1 -10 0 222.48 27.8
 1 -10 0 191.68 18.6
 -1 10 0 257.97 29.4
 -1 10 0 237.68 28.6
 -1 10 0 210.68 24.7
 0 -10 0 191.68 25.1
 0 -10 0 204.38 23.9
 0 -10 0 181.88 18.8
 0 -10 0 182.38 20.5
 0 -10 0 196.88 22.9
 0 -10 0 256.47 27.7
 0 -10 0 214.78 19.3
 0 -10 0 116.09 24.9
 0 10 0 159.18 23.9
 0 10 0 231.58 26.5
 0 10 0 202.18 24.9
 0 10 0 209.18 22.8
 -1 -10 0 236.48 29.6
 -1 -10 0 221.18 27.4
 -1 -10 0 213.78 21.6
 -1 -10 0 239.68 24.6
 -1 -10 0 304.17 27.7
 -1 -10 0 245.48 24.5
 -1 -10 0 264.97 22.5
 -1 -10 0 262.17 27.4
 1 10 0 224.28 23.6
 1 10 0 195.58 28.9
 1 10 0 246.58 29
 1 10 0 269.07 27.2
 1 10 0 183.08 26.7
 -2 -10 0 597.14 44.6
 -2 -10 0 582.04 46.2
 -2 -10 0 647.24 45.6
 -2 -10 0 481.35 51.69
 -2 -10 0 620.24 44
 -2 -10 0 640.04 47
 -2 -10 0 626.74 47
 2 10 0 641.04 42.6
 2 10 0 567.44 44.4
 2 10 0 615.04 45.9
 2 10 0 616.94 47.8
 2 10 0 583.84 47.2
 2 10 0 591.94 48.5
 -3 -10 0 16.6 17.7
 -3 -10 0 -30.7 13.6
 -3 -10 0 -7.7 8.8
 -3 -10 0 -9.2 14
 -3 -10 0 -9.7 14
 -3 -10 0 6.3 11.1
 -3 -10 0 5.8 10.2
 -3 -10 0 4.7 12.3
 3 10 0 24.3 12.2
 3 10 0 -9.5 10
 3 10 0 -31.3 15.5
 3 10 0 -20.3 16.1
 3 10 0 3.5 14
 3 10 0 11.4 12.3
 -4 -10 0 767.92 59.09
 -4 -10 0 660.63 63.69
 -4 -10 0 810.62 59.09
 -4 -10 0 866.71 56.79
 -4 -10 0 754.62 57.89
 -4 -10 0 890.51 58.69
 -4 -10 0 838.22 55.99
 -4 -10 0 810.82 58.49
 -4 -10 0 764.92 59.49
 4 10 0 673.93 60.89
 4 10 0 828.82 56.49
 4 10 0 846.62 61.89
 4 10 0 832.32 57.19
 4 10 0 824.02 55.19
 4 10 0 792.52 58.29
 4 10 0 878.91 56.69
 4 10 0 769.22 59.29
 -5 -10 0 157.08 21.1
 -5 -10 0 154.18 23.8
 -5 -10 0 185.68 24.8
 -5 -10 0 155.18 29.3
 -5 -10 0 157.78 22
 -5 -10 0 178.38 22.2
 -5 -10 0 163.98 24.7
 -5 -10 0 207.48 22.7
 5 10 0 165.58 20.2
 5 10 0 155.48 22.3
 5 10 0 164.48 21.6
 5 10 0 169.98 21.3
 5 10 0 156.08 26.2
 5 10 0 146.09 20.2
 -6 -10 0 139.49 19.6
 -6 -10 0 163.28 21.5
 -6 -10 0 118.69 18.3
 -6 -10 0 111.69 21.8
 -6 -10 0 140.39 21.3
 -6 -10 0 149.29 24.3
 6 10 0 135.59 15.2
 6 10 0 115.29 24.1
 6 10 0 153.08 21.8
 6 10 0 125.49 19.8
 6 10 0 133.29 20.5
 6 10 0 116.89 14.2
 6 10 0 81.99 23.5
 6 10 0 132.79 22.4
 6 10 0 123.19 19.6
 -7 -10 0 33.4 21.6
 -7 -10 0 13.1 14
 -7 -10 0 29.9 16.7
 -7 -10 0 28 17.5
 -7 -10 0 34.3 15.6
 -7 -10 0 15.4 16.8
 7 10 0 27.8 14.6
 7 10 0 9.6 10.7
 7 10 0 20.9 20.3
 7 10 0 6 19
 7 10 0 15.1 16
 7 10 0 33.8 20.3
 7 10 0 -8.6 20.4
 7 10 0 33.6 15.4
 -8 -10 0 55.29 20.5
 -8 -10 0 45.5 17.4
 -8 -10 0 53.89 25.6
 -8 -10 0 41.2 16.6
 -8 -10 0 64.29 20.9
 -8 -10 0 30.2 17.6
 8 10 0 42.1 18.8
 8 10 0 41 22.7
 8 10 0 26.1 14.2
 8 10 0 13.6 18
 8 10 0 26 16.9
 8 10 0 39.8 23.1
 -9 -10 0 278.97 38.7
 -9 -10 0 284.57 31.3
 -9 -10 0 266.47 32.7
 -9 -10 0 238.18 33.3
 -9 -10 0 262.07 33.3
 9 10 0 237.48 30.5
 9 10 0 291.57 34.5
 9 10 0 281.27 41.1
 9 10 0 263.17 34.3
 9 10 0 274.07 38.1
 -10 -10 0 184.38 26.5
 -10 -10 0 183.18 32.3
 -10 -10 0 153.18 24.9
 -10 -10 0 162.38 30.4
 -10 -10 0 153.38 30.2
 10 10 0 188.68 31.3
 10 10 0 95.09 23.2
 10 10 0 145.49 35.7
 10 10 0 138.79 33.3
 10 10 0 148.69 29.8
 -11 -10 0 127.39 29.4
 -11 -10 0 85.79 28.6
 -11 -10 0 69.59 25
 -11 -10 0 78.19 23.6
 -11 -10 0 106.99 32.2
 11 10 0 59.39 34.1
 11 10 0 84.39 17.6
 11 10 0 71.59 26.8
 11 10 0 74.19 34.5
 11 10 0 72.39 28.6
 -12 -10 0 116.49 52.99
 -12 -10 0 64.99 33.2
 -12 -10 0 60.09 37.7
 -12 -10 0 152.08 28
 -12 -10 0 72.99 27.7
 12 10 0 99.09 32.3
 12 10 0 119.69 40.1
 12 10 0 -27.8 56.09
 12 10 0 105.19 43.9
 -13 -10 0 45.9 28.1
 -13 -10 0 128.29 61.09
 -13 -10 0 38.4 28.8
 -13 -10 0 -1.3 39.2
 13 10 0 107.49 37.5
 13 10 0 6.7 39.5
 13 10 0 52.39 36.1
 13 10 0 16.8 37.8
 -14 -10 0 41 46
 -14 -10 0 86.19 36.4
 -14 -10 0 65.89 44.7
 -14 -10 0 95.79 34.7
 14 10 0 76.59 43.3
 14 10 0 66.39 47.4
 14 10 0 77.79 47.2
 14 10 0 192.58 41.8
 -15 -10 0 -0.1 36.8
 -15 -10 0 41.4 57.49
 -15 -10 0 -0.8 43.4
 15 10 0 27.2 55.39
 15 10 0 85.59 45.2
 15 10 0 62.99 55.09
 15 10 0 20.7 54.49
 -16 -10 0 13.8 67.69
 -16 -10 0 -28.7 48.1
 -16 -10 0 -40.4 52.49
 16 10 0 14.2 62.09
 16 10 0 30.6 63.39
 16 10 0 65.19 59.39
 16 10 0 78.69 54.09
 10 -11 0 -24.3 71.49
 10 -11 0 -76.59 52.59
 -10 11 0 70.09 72.89
 9 -11 0 69.89 57.09
 -9 11 0 -139.09 61.29
 8 -11 0 42.7 42.4
 8 -11 0 35 52.89
 -8 11 0 16.1 46.6
 7 -11 0 -34.4 35.5
 7 -11 0 -10.6 41.2
 7 -11 0 8.1 35.8
 -7 11 0 -27.4 35.4
 6 -11 0 -5.4 24.6
 6 -11 0 17.6 31.6
 -6 11 0 44 31.9
 5 -11 0 42.3 24.5
 5 -11 0 -25.9 19.7
 5 -11 0 71.09 46.5
 5 -11 0 -34.8 16.6
 5 -11 0 -46.6 22.9
 5 -11 0 5.7 27.8
 -5 11 0 -12.9 30.8
 4 -11 0 -11.9 16
 4 -11 0 14.3 14
 4 -11 0 11 21.3
 4 -11 0 -7 29.9
 4 -11 0 -16.4 15.8
 4 -11 0 5.9 20.8
 4 -11 0 -5.3 19.6
 4 -11 0 -1.7 25.3
 -4 11 0 -11.3 23.3
 -4 11 0 9.2 15.2
 3 -11 0 13.7 18.1
 3 -11 0 41.1 20.4
 3 -11 0 25 15.8
 3 -11 0 -15.5 11.8
 3 -11 0 -5 13.3
 3 -11 0 -3.8 13.5
 3 -11 0 -11.5 20.6
 -3 11 0 5.6 15.3
 -3 11 0 -1.6 22.1
 -3 11 0 -21.9 20
 -3 11 0 -8.9 20.4
 2 -11 0 20 18.4
 2 -11 0 -3.3 10.7
 2 -11 0 -8.4 10.2
 2 -11 0 6.5 12.3
 2 -11 0 -23.8 13.1
 2 -11 0 17.2 16
 2 -11 0 -18.5 19.5
 -2 11 0 2.2 20
 -2 11 0 -14.3 15.3
 -2 11 0 26.5 20.4
 -2 11 0 -6.4 25.4
 1 -11 0 1.7 11.7
 1 -11 0 9.9 11.5
 1 -11 0 -6.5 18.1
 1 -11 0 13 18
 1 -11 0 0.3 8.5
 1 -11 0 31.8 15.3
 1 -11 0 11.1 9.5
 1 -11 0 33.4 21.6
 1 -11 0 -9.3 9.8
 -1 11 0 14.4 18.4
 -1 11 0 27.5 20.3
 -1 11 0 -17.8 15.4
 -1 11 0 31.4 18.7
 0 -11 0 13.2 9.9
 0 -11 0 24.4 14.1
 0 -11 0 16.3 11.4
 0 -11 0 31.7 19.4
 0 -11 0 -7.8 16.8
 0 -11 0 33.9 17.3
 0 -11 0 28.3 12.5
 0 11 0 18.5 20.1
 0 11 0 10.7 16.7
 0 11 0 -14.2 16.3
 0 11 0 3.7 18.5
 -1 -11 0 24.3 17.9
 -1 -11 0 -3.1 10.6
 -1 -11 0 13.7 14.1
 -1 -11 0 -10.7 12.8
 -1 -11 0 8.9 14.4
 -1 -11 0 13.8 16.6
 -1 -11 0 -6.8 10
 1 11 0 10.7 12.5
 1 11 0 -8.5 17.1
 1 11 0 15.1 18.7
 1 11 0 -5.3 14.4
 1 11 0 2.5 17.4
 -2 -11 0 -14.7 16.4
 -2 -11 0 9 13.9
 -2 -11 0 5.5 11.4
 -2 -11 0 -0.9 16.1
 -2 -11 0 13.7 10.9
 -2 -11 0 -36.1 13.3
 -2 -11 0 14.9 13.8
 2 11 0 -0.2 12.4
 2 11 0 17.6 12
 2 11 0 1.4 9.3
 2 11 0 7.5 17.6
 2 11 0 11.2 17.9
 2 11 0 -23.8 24
 2 11 0 24 15.6
 -3 -11 0 16.8 16.3
 -3 -11 0 6.6 16.5
 -3 -11 0 17.1 14.3
 -3 -11 0 4.6 14.8
 -3 -11 0 17.6 13.8
 -3 -11 0 -7.1 14.1
 3 11 0 7 13.9
 3 11 0 5.8 9.2
 3 11 0 -13.1 14.3
 3 11 0 -25.4 17.9
 3 11 0 8.1 16.7
 3 11 0 1.6 11
 -4 -11 0 7.4 12
 -4 -11 0 13.1 15.2
 -4 -11 0 -4.2 13.7
 -4 -11 0 -7 16.6
 -4 -11 0 1.5 10.8
 -4 -11 0 8.6 13.3
 -4 -11 0 14.3 16.6
 4 11 0 9.9 13
 4 11 0 26.1 13.3
 4 11 0 21 15.8
 4 11 0 -9.4 18.6
 4 11 0 -3.2 10.5
 4 11 0 -4 13.4
 4 11 0 23.9 17.1
 -5 -11 0 11.7 15.2
 -5 -11 0 -1.9 13.2
 -5 -11 0 2 16.8
 -5 -11 0 -16.3 13.1
 -5 -11 0 1.8 14.2
 -5 -11 0 19.2 18.6
 5 11 0 8.6 14.9
 5 11 0 -7.2 17.2
 5 11 0 -1.5 12.4
 5 11 0 -7.1 14
 5 11 0 10 12.3
 5 11 0 9.7 15.1
 5 11 0 5.1 20.2
 -6 -11 0 32 20.9
 -6 -11 0 19.2 14.7
 -6 -11 0 30.4 21.4
 -6 -11 0 -21.7 13.5
 -6 -11 0 3.2 17.3
 -6 -11 0 8.2 14.5
 6 11 0 41.5 22.9
 6 11 0 7 14.2
 6 11 0 5.7 15.6
 6 11 0 -0.6 17.7
 6 11 0 4 7.8
 6 11 0 20.1 17.2
 6 11 0 -17.1 14.8
 -7 -11 0 34.9 23.4
 -7 -11 0 37.6 19.2
 -7 -11 0 -11.3 15
 -7 -11 0 22 19.3
 -7 -11 0 4.9 14.4
 -7 -11 0 10.6 18
 7 11 0 19.9 16.8
 7 11 0 -0.6 24.8
 7 11 0 6.8 10.9
 7 11 0 3.2 17.5
 7 11 0 19.5 16.4
 7 11 0 -16.7 11
 7 11 0 -22 22.5
 -8 -11 0 -1.1 17.2
 -8 -11 0 41.1 28.5
 -8 -11 0 -1.1 20.5
 -8 -11 0 4.6 19.5
 -8 -11 0 -4.5 16.7
 -8 -11 0 8.3 19.6
 8 11 0 -54.49 26.7
 8 11 0 1.5 13.4
 8 11 0 16.1 19.9
 8 11 0 0.4 25.4
 8 11 0 16.5 18.1
 8 11 0 28.4 19.6
 -9 -11 0 -11.4 19.2
 -9 -11 0 -6.9 17.6
 -9 -11 0 -29 21.5
 -9 -11 0 6.3 23.3
 -9 -11 0 -4.1 21
 9 11 0 -15.3 26.4
 9 11 0 -17.4 26.1
 9 11 0 26 16.4
 9 11 0 -3.7 21.7
 9 11 0 15.3 21.3
 -10 -11 0 5.1 24
 -10 -11 0 -44.1 26
 -10 -11 0 22.8 21.8
 -10 -11 0 -31.4 19.3
 -10 -11 0 14.7 25.3
 10 11 0 26.4 24.9
 10 11 0 7.6 30.9
 10 11 0 -14.3 19.7
 10 11 0 18.6 29.9
 10 11 0 45.3 25.6
 -11 -11 0 5.9 22.4
 -11 -11 0 0.9 28.6
 -11 -11 0 -4.9 31.3
 11 11 0 35.6 58.69
 11 11 0 7.2 56.19
 11 11 0 -31.8 33.6
 11 11 0 22.9 29.1
 -12 -11 0 -28.2 61.09
 -12 -11 0 27 27.5
 -12 -11 0 -20.8 29.7
 -12 -11 0 -19.9 30.9
 -12 -11 0 -24 25.5
 12 11 0 34.5 39.9
 12 11 0 -36.8 44.7
 12 11 0 -21.3 32.1
 12 11 0 21.6 31
 -13 -11 0 -11.8 35.9
 -13 -11 0 -16.4 41.1
 -13 -11 0 49.8 30
 -13 -11 0 42.4 35.4
 -13 -11 0 30.9 31.3
 13 11 0 -46.3 42.6
 13 11 0 23.8 37.6
 13 11 0 -11.8 39.5
 13 11 0 -53.09 35.6
 -14 -11 0 43 56.29
 -14 -11 0 59.69 43.6
 -14 -11 0 -25.1 33.4
 -14 -11 0 43.4 43.5
 14 11 0 27 42.3
 14 11 0 80.39 45.5
 14 11 0 78.49 49.5
 14 11 0 -14.1 46.2
 -15 -11 0 -7.3 63.39
 -15 -11 0 -7.2 45.4
 -15 -11 0 21.6 39.7
 15 11 0 33.5 48.3
 15 11 0 74.59 58.89
 15 11 0 96.69 55.19
 15 11 0 129.89 50.09
 -16 -11 0 34.4 49.1
 -16 -11 0 22.2 73.19
 16 11 0 74.69 62.69
 16 11 0 83.69 73.49
 16 11 0 -37.3 60.69
 16 11 0 -7.8 65.49
 9 -12 0 2.1 72.09
 9 -12 0 -29 50.29
 -9 12 0 -146.89 75.59
 8 -12 0 -64.39 38
 8 -12 0 -49.5 59.79
 -8 12 0 70.19 52.99
 7 -12 0 -52.09 30.8
 7 -12 0 50.09 44.3
 7 -12 0 163.58 50.79
 -7 12 0 -62.29 40
 6 -12 0 -67.89 43.1
 6 -12 0 42 38.8
 6 -12 0 6.3 26.3
 -6 12 0 -22.7 36.4
 5 -12 0 -16.9 32.4
 5 -12 0 -13.8 22.3
 5 -12 0 0.8 24.1
 -5 12 0 10.4 33.3
 4 -12 0 14 26.5
 4 -12 0 -46.4 41.9
 4 -12 0 -45 29.1
 4 -12 0 -9.5 18.6
 4 -12 0 -36.1 19.9
 -4 12 0 41.3 34.3
 3 -12 0 18.8 16.4
 3 -12 0 -27.2 18
 3 -12 0 39.6 25.5
 3 -12 0 -7.2 11.8
 3 -12 0 -33.8 24.2
 3 -12 0 -8 21.3
 -3 12 0 -13.2 24.7
 -3 12 0 -34 23.9
 -3 12 0 19.1 25.5
 -3 12 0 -0.2 19.8
 2 -12 0 1.8 11
 2 -12 0 -13.1 15.1
 2 -12 0 5.3 12.1
 2 -12 0 17.5 18.5
 2 -12 0 0.3 15.2
 2 -12 0 -12.6 21.9
 2 -12 0 0.6 23.3
 -2 12 0 29.3 23.6
 -2 12 0 0.5 24.8
 -2 12 0 -7.3 20.1
 -2 12 0 -3.6 23.2
 1 -12 0 -3.9 13.2
 1 -12 0 0.9 25.5
 1 -12 0 -5.4 19.1
 1 -12 0 -26 17.3
 1 -12 0 -3.5 10.5
 1 -12 0 24.3 20.9
 1 -12 0 1.5 13.9
 -1 12 0 -4.1 38.1
 -1 12 0 -21.6 19.8
 -1 12 0 46.4 23.2
 0 -12 0 90.99 16.5
 0 -12 0 69.89 19.3
 0 -12 0 76.19 15.6
 0 -12 0 79.29 24.3
 0 -12 0 75.99 13.1
 0 12 0 42.2 23.7
 0 12 0 48.5 23
 0 12 0 80.79 23.1
 -1 -12 0 18 15.5
 -1 -12 0 16.9 13.1
 -1 -12 0 13.1 17
 -1 -12 0 13.1 22.3
 -1 -12 0 35.1 21.5
 1 12 0 21.7 18.4
 1 12 0 29.1 21.8
 1 12 0 16 21.4
 1 12 0 -8.7 14
 -2 -12 0 16.5 12.7
 -2 -12 0 -3.3 17.5
 -2 -12 0 15.6 16.7
 -2 -12 0 16.6 15.9
 -2 -12 0 -2.7 20.6
 -2 -12 0 12.8 13.8
 2 12 0 15.2 15.1
 2 12 0 -6.9 16.3
 2 12 0 6.9 19.8
 2 12 0 -3 20.8
 -3 -12 0 356.36 36.9
 -3 -12 0 376.36 33.6
 -3 -12 0 399.86 37.5
 -3 -12 0 408.66 32.6
 -3 -12 0 438.56 40.7
 -3 -12 0 280.57 35.6
 3 12 0 356.46 35.2
 3 12 0 321.77 29.6
 3 12 0 353.86 39.5
 3 12 0 327.77 40.3
 3 12 0 331.17 35
 3 12 0 320.17 31.1
 -4 -12 0 393.66 42.9
 -4 -12 0 431.16 38.8
 -4 -12 0 388.26 39.9
 -4 -12 0 454.95 41.8
 -4 -12 0 505.15 40.3
 -4 -12 0 397.06 34.6
 4 12 0 440.76 37.7
 4 12 0 474.65 47
 4 12 0 409.96 36.7
 4 12 0 400.26 35.5
 4 12 0 402.96 33.5
 4 12 0 434.96 43.2
 4 12 0 382.16 40.4
 -5 -12 0 102.39 25
 -5 -12 0 124.19 19.5
 -5 -12 0 82.69 19.6
 -5 -12 0 126.09 20
 -5 -12 0 126.29 21.5
 -5 -12 0 126.39 26.1
 5 12 0 119.79 28
 5 12 0 128.89 19.4
 5 12 0 77.29 16.7
 5 12 0 122.39 22.9
 5 12 0 80.39 19.6
 5 12 0 106.39 19.8
 5 12 0 104.19 22.9
 -6 -12 0 -6.6 20.7
 -6 -12 0 22.4 18.2
 -6 -12 0 11.6 24.1
 -6 -12 0 9.7 16.1
 -6 -12 0 12.4 17.8
 -6 -12 0 8 18.8
 6 12 0 8 17.8
 6 12 0 -1.5 22.3
 6 12 0 -9.6 25.4
 6 12 0 36.9 15.3
 6 12 0 -12.7 15.1
 6 12 0 45.2 19.9
 6 12 0 30.4 17.9
 -7 -12 0 -30.5 28.4
 -7 -12 0 -12.6 17.9
 -7 -12 0 17.6 17.9
 -7 -12 0 6.6 19.1
 -7 -12 0 40 23.5
 -7 -12 0 12 27.3
 7 12 0 15.9 10.6
 7 12 0 28.2 19.8
 7 12 0 26.4 11.5
 7 12 0 9.2 18.3
 7 12 0 6.6 20.2
 7 12 0 -12.8 25.7
 -8 -12 0 200.78 32.3
 -8 -12 0 101.69 23.7
 -8 -12 0 139.69 47.4
 -8 -12 0 132.59 27.7
 -8 -12 0 131.79 24.8
 -8 -12 0 112.29 29.8
 8 12 0 161.48 18.6
 8 12 0 104.89 24.8
 8 12 0 143.29 18.9
 8 12 0 165.78 33.8
 8 12 0 99.09 30.6
 8 12 0 148.99 27.2
 8 12 0 80.19 32.4
 -9 -12 0 34.4 20.6
 -9 -12 0 44.3 26.4
 -9 -12 0 12.2 20.9
 -9 -12 0 54.79 27.8
 -9 -12 0 36.8 25.5
 9 12 0 52.29 25.6
 9 12 0 8.6 23
 9 12 0 64.19 32.7
 9 12 0 20.1 18.1
 9 12 0 29.4 18
 9 12 0 62.79 37.9
 -10 -12 0 46.1 31.5
 -10 -12 0 2.5 21.5
 -10 -12 0 21.1 27.5
 10 12 0 11.8 47.2
 10 12 0 1.5 33.8
 10 12 0 -4 20.1
 10 12 0 -11.4 25.7
 -11 -12 0 45.1 36
 -11 -12 0 -23.2 25.1
 -11 -12 0 15.9 29.1
 -11 -12 0 -18.5 25.3
 11 12 0 42.5 39.7
 11 12 0 20.2 29.7
 11 12 0 52.59 39.9
 11 12 0 -12.5 36.3
 -12 -12 0 17.2 36.1
 -12 -12 0 96.09 78.89
 -12 -12 0 61.99 39.6
 -12 -12 0 -10.3 26.7
 -12 -12 0 -7.8 29.5
 12 12 0 16.3 44.2
 12 12 0 38.2 43.8
 12 12 0 42.3 34.5
 12 12 0 21.1 36
 -13 -12 0 6 37.8
 -13 -12 0 -16.6 31
 -13 -12 0 4.8 39.1
 -13 -12 0 10.5 47.4
 -13 -12 0 -7.6 32.1
 13 12 0 19.5 39.2
 13 12 0 69.79 45.5
 13 12 0 -20.1 41.1
 13 12 0 122.89 54.09
 -14 -12 0 122.79 50.39
 -14 -12 0 -24.6 44.5
 -14 -12 0 140.59 67.59
 -14 -12 0 0.4 38.6
 14 12 0 46.2 60.49
 14 12 0 94.59 48.7
 14 12 0 101.69 47.6
 14 12 0 111.69 55.49
 -15 -12 0 29.5 53.59
 -15 -12 0 233.18 80.79
 -15 -12 0 92.89 45.9
 15 12 0 144.69 71.99
 15 12 0 76.39 55.69
 15 12 0 90.19 55.39
 15 12 0 188.88 67.69
 -16 -12 0 -82.99 49.2
 -16 -12 0 -39.3 59.39
 -16 -12 0 -29.9 86.99
 16 12 0 -66.99 68.99
 16 12 0 -6 60.99
 16 12 0 17.3 69.49
 16 12 0 -85.39 82.99
 8 -13 0 15.2 74.59
 -8 13 0 106.79 76.49
 7 -13 0 19.5 51.99
 7 -13 0 -10 55.09
 -7 13 0 35.5 48.2
 6 -13 0 -18.4 50.69
 6 -13 0 -11.5 44.1
 6 -13 0 4.3 36.9
 5 -13 0 -22 45.4
 5 -13 0 -37.1 39
 5 -13 0 12.1 26.3
 -5 13 0 42.7 37.8
 4 -13 0 -25.1 22.3
 4 -13 0 15.5 34.7
 4 -13 0 -100.09 37.2
 4 -13 0 -42.9 24
 -4 13 0 14.2 34.5
 3 -13 0 10.3 21.4
 3 -13 0 0.8 42.2
 3 -13 0 1.6 33.4
 3 -13 0 19.8 17.6
 -3 13 0 29.9 31.1
 2 -13 0 -9.8 13.3
 2 -13 0 -2.2 23.3
 2 -13 0 9.5 29.7
 2 -13 0 21 19.1
 -2 13 0 -36.7 28.6
 -2 13 0 -5.3 26.1
 1 -13 0 -7.5 16.4
 1 -13 0 42.8 25.7
 1 -13 0 -11.3 11.5
 1 -13 0 -32.1 21.3
 -1 13 0 -5.1 25
 -1 13 0 21 26.5
 0 -13 0 0.5 12.1
 0 -13 0 -18.9 20.5
 0 -13 0 1.3 16.4
 0 -13 0 34.8 26.9
 0 -13 0 -0.1 17
 0 13 0 59.69 26.3
 0 13 0 -7.1 22.8
 0 13 0 32.6 26.9
 -1 -13 0 -4.5 15.4
 -1 -13 0 15.5 16.7
 -1 -13 0 -41.7 24.9
 -1 -13 0 30.4 17.8
 -1 -13 0 -1 24.4
 -1 -13 0 -23.6 19.6
 1 13 0 12.1 26.5
 1 13 0 -34.7 19.9
 1 13 0 37.7 24.1
 -2 -13 0 -12.6 15.7
 -2 -13 0 0.8 26.4
 -2 -13 0 12.4 22.1
 -2 -13 0 26 16.1
 2 13 0 -12.1 24.6
 2 13 0 -45 22.9
 2 13 0 -45.3 15.7
 2 13 0 8.3 19.5
 -3 -13 0 5.1 19.9
 -3 -13 0 -9.5 16.2
 -3 -13 0 -0.3 16.2
 -3 -13 0 -8.2 24
 -3 -13 0 14.6 25.9
 3 13 0 -5.8 12.4
 3 13 0 32.6 19.7
 3 13 0 -17.3 17.9
 3 13 0 26.5 23.1
 3 13 0 17 25.1
 -4 -13 0 4.7 17.2
 -4 -13 0 7.5 23
 -4 -13 0 6.6 24.2
 -4 -13 0 -27.4 19.9
 -4 -13 0 15.2 18.1
 4 13 0 -12.7 15.9
 4 13 0 -5.4 22.5
 4 13 0 6.7 12.6
 4 13 0 26.3 17.4
 4 13 0 20.6 21.6
 4 13 0 -12.7 16.7
 4 13 0 -37.3 27.5
 -5 -13 0 4.6 19.4
 -5 -13 0 23 16.7
 -5 -13 0 -14.8 22.6
 -5 -13 0 34.2 20.1
 -5 -13 0 1.5 24.2
 -5 -13 0 20.2 25.8
 5 13 0 0.4 16.9
 5 13 0 20.6 18.3
 5 13 0 -1.2 22
 5 13 0 -10.9 17.2
 5 13 0 -6.2 15
 5 13 0 23.9 29
 5 13 0 22.9 23
 -6 -13 0 12.9 28.1
 -6 -13 0 -11.1 18.5
 -6 -13 0 14.9 18.8
 -6 -13 0 -33.2 20.3
 -6 -13 0 30 26.2
 -6 -13 0 -7.6 19.9
 6 13 0 1 17.4
 6 13 0 -4.7 21.8
 6 13 0 -7.4 16.4
 6 13 0 32.5 19.5
 6 13 0 2 21.5
 6 13 0 -38.5 27.4
 -7 -13 0 -22.2 19.8
 -7 -13 0 -13 21.4
 -7 -13 0 -14 26.1
 -7 -13 0 -29.5 19.4
 -7 -13 0 7.6 30.8
 -7 -13 0 13.9 24
 7 13 0 -17.4 21.4
 7 13 0 -11.4 18.7
 7 13 0 2.5 16
 7 13 0 -7.6 28.7
 7 13 0 -13 23.1
 -8 -13 0 -31.5 22.7
 -8 -13 0 -57.99 25.7
 -8 -13 0 -4.3 22.2
 -8 -13 0 16 26.1
 -8 -13 0 -27.8 24.9
 8 13 0 33.2 23.4
 8 13 0 14.8 13.4
 8 13 0 -20.5 32
 8 13 0 -5.3 22.8
 -9 -13 0 -12.9 21.7
 -9 -13 0 11.7 32.3
 -9 -13 0 30.5 28.5
 -9 -13 0 -53.99 27.4
 9 13 0 0.4 26.1
 9 13 0 0 18.2
 9 13 0 -1.8 14.7
 9 13 0 3 24.5
 9 13 0 15.4 36.2
 9 13 0 -20.5 25.8
 -10 -13 0 4.4 34.4
 -10 -13 0 27 24.1
 -10 -13 0 -32.7 30
 -10 -13 0 32.8 30.7
 -10 -13 0 -37.7 30.9
 10 13 0 -10.5 28.5
 10 13 0 -14.7 28.3
 10 13 0 8.4 44.2
 10 13 0 21.2 21.2
 10 13 0 19.2 39.9
 -11 -13 0 38.6 40.9
 -11 -13 0 13.9 28.5
 -11 -13 0 36.1 36.5
 -11 -13 0 -21.5 48.3
 -11 -13 0 39.1 28.4
 11 13 0 57.89 32.7
 11 13 0 -0.5 24
 11 13 0 43.8 44.8
 11 13 0 32 46
 11 13 0 -0.9 33.1
 -12 -13 0 7.7 33
 -12 -13 0 54.39 51.19
 -12 -13 0 1.3 33.9
 -12 -13 0 39.8 42.6
 -12 -13 0 -10.5 35.2
 12 13 0 -2.2 28.2
 12 13 0 -58.69 36.2
 12 13 0 -0.3 55.69
 12 13 0 -50.59 35.6
 12 13 0 28.6 47.5
 -13 -13 0 31.2 37.1
 -13 -13 0 -50.99 53.89
 -13 -13 0 -58.29 41.7
 -13 -13 0 44.9 44
 13 13 0 37.2 42.6
 13 13 0 51.19 33.8
 13 13 0 -19.1 42
 13 13 0 122.69 56.39
 13 13 0 -29.6 53.89
 -14 -13 0 -3.3 68.59
 -14 -13 0 71.69 53.09
 -14 -13 0 -33.4 64.89
 -14 -13 0 15.9 40.9
 14 13 0 29 50.89
 14 13 0 -25 38.2
 14 13 0 25.8 49.5
 14 13 0 84.49 62.09
 14 13 0 96.39 60.89
 -15 -13 0 -58.99 46.5
 -15 -13 0 -3.7 62.49
 -15 -13 0 134.39 79.69
 -15 -13 0 -94.99 56.09
 15 13 0 -115.19 44.1
 15 13 0 -30.3 55.99
 15 13 0 166.58 73.49
 15 13 0 55.99 66.09
 15 13 0 43.6 58.59
 7 -14 0 267.17 77.69
 6 -14 0 17.5 52.19
 6 -14 0 20.9 56.89
 -6 14 0 72.89 51.49
 5 -14 0 -0.2 45.5
 5 -14 0 93.79 56.29
 -5 14 0 -72.29 41.6
 4 -14 0 -33.5 41
 4 -14 0 -52.49 48.8
 -4 14 0 -7.5 36.9
 3 -14 0 20 26.4
 3 -14 0 20 40.5
 3 -14 0 25.5 48.8
 -3 14 0 48.5 35.2
 2 -14 0 45.1 58.09
 2 -14 0 49.4 23.8
 -2 14 0 49.4 35.3
 -2 14 0 110.89 33.5
 1 -14 0 69.49 21.5
 -1 14 0 64.79 33.1
 -1 14 0 53.59 30.6
 0 -14 0 140.99 24.3
 0 -14 0 140.99 18.8
 0 -14 0 117.59 31.4
 0 -14 0 184.28 25.4
 0 -14 0 123.49 29.5
 0 14 0 236.48 37.6
 0 14 0 162.78 32.7
 0 14 0 58.59 36.1
 -1 -14 0 8.5 19.1
 -1 -14 0 34 32.6
 -1 -14 0 -15.1 40
 -1 -14 0 9.9 18.9
 -1 -14 0 57.79 32.2
 -1 -14 0 -7.8 21.2
 1 14 0 69.79 30.6
 1 14 0 13.2 26
 1 14 0 -44.6 30.7
 -2 -14 0 103.49 21.3
 -2 -14 0 127.39 35
 -2 -14 0 81.69 41.5
 -2 -14 0 177.18 24.9
 -2 -14 0 132.79 37.3
 2 14 0 38 33.6
 2 14 0 211.98 37.2
 2 14 0 151.98 28.8
 2 14 0 100.59 23.3
 -3 -14 0 76.09 32.6
 -3 -14 0 50.09 20.5
 -3 -14 0 47.4 20.5
 -3 -14 0 69.29 28.4
 3 14 0 58.69 23.4
 3 14 0 43.6 22.2
 3 14 0 57.59 29.9
 -4 -14 0 61.09 21.8
 -4 -14 0 60.69 27
 -4 -14 0 36.3 21
 -4 -14 0 56.69 30.3
 -4 -14 0 23.2 26.3
 4 14 0 9.5 16.5
 4 14 0 82.79 34.7
 4 14 0 24.9 24
 4 14 0 31.9 22.8
 4 14 0 36.4 30.1
 -5 -14 0 279.37 34.3
 -5 -14 0 212.08 40.2
 -5 -14 0 271.27 32
 -5 -14 0 218.28 36.1
 -5 -14 0 240.18 40.1
 5 14 0 189.88 40.9
 5 14 0 185.18 28.2
 5 14 0 235.98 28.8
 5 14 0 216.98 28.4
 5 14 0 159.98 34
 5 14 0 106.89 33.7
 5 14 0 264.17 30.2
 -6 -14 0 -36.6 22.7
 -6 -14 0 48.4 30.3
 -6 -14 0 10.2 20.3
 -6 -14 0 -54.59 39.2
 -6 -14 0 -38.9 29.4
 -6 -14 0 26.8 31.2
 6 14 0 -11.1 34.7
 6 14 0 6.3 26.8
 6 14 0 -32.3 21.1
 6 14 0 5.6 19.4
 6 14 0 20.4 19.3
 6 14 0 -10.5 24.2
 -7 -14 0 23.8 26.6
 -7 -14 0 6.1 35.2
 -7 -14 0 -14.5 24
 -7 -14 0 -9.4 22.9
 7 14 0 52.39 24.4
 7 14 0 15.1 46.2
 7 14 0 8.9 19.5
 7 14 0 8 35.6
 7 14 0 50.39 23
 -8 -14 0 -29.8 32.9
 -8 -14 0 33.4 30.2
 -8 -14 0 38.2 45.9
 -8 -14 0 -10 28.3
 8 14 0 7.5 35.6
 8 14 0 42.9 19.7
 8 14 0 23 28.9
 8 14 0 6.1 26.2
 -9 -14 0 199.98 38.3
 -9 -14 0 99.99 33.4
 -9 -14 0 191.38 39.8
 -9 -14 0 138.39 31.4
 -9 -14 0 145.99 40.5
 9 14 0 163.48 26.1
 9 14 0 136.79 22.7
 9 14 0 135.89 33.2
 9 14 0 97.69 32.9
 9 14 0 109.39 44.6
 -10 -14 0 3.2 28.8
 -10 -14 0 -62.49 28.5
 -10 -14 0 46.5 39.4
 -10 -14 0 19 46.8
 -10 -14 0 29 37.9
 10 14 0 34.7 35.5
 10 14 0 -5.2 23.2
 10 14 0 14.3 32.3
 10 14 0 -7.2 41.6
 -11 -14 0 116.59 35
 -11 -14 0 107.89 42
 -11 -14 0 130.19 48.2
 -11 -14 0 101.49 35.7
 -11 -14 0 95.79 41.7
 11 14 0 39.5 56.79
 11 14 0 165.48 48.2
 11 14 0 141.29 39.5
 11 14 0 97.29 34.7
 -12 -14 0 35.7 43.4
 -12 -14 0 25.7 59.49
 -12 -14 0 36 35.9
 -12 -14 0 13.3 44.6
 -12 -14 0 15.9 35
 12 14 0 35 57.59
 12 14 0 52.39 51.29
 12 14 0 -11.2 40.8
 12 14 0 36.7 38.9
 -13 -14 0 15.8 41.2
 -13 -14 0 -16 48.9
 -13 -14 0 9.1 59.79
 -13 -14 0 -33.9 47.4
 -13 -14 0 89.89 41.6
 13 14 0 41.5 45.3
 13 14 0 -8.8 46.5
 13 14 0 139.79 68.49
 13 14 0 81.69 57.39
 -14 -14 0 -83.49 43.9
 -14 -14 0 82.29 57.09
 -14 -14 0 -114.29 68.89
 -14 -14 0 56.19 65.59
 14 14 0 79.19 72.59
 14 14 0 62.39 54.99
 14 14 0 72.19 53.99
 14 14 0 9.3 63.59
 -15 -14 0 -13.2 50.39
 -15 -14 0 -20.5 81.79
 -15 -14 0 34.5 62.99
 15 14 0 -65.79 85.89
 15 14 0 -26.3 76.49
 15 14 0 -14.8 59.79
 5 -15 0 -37.1 62.09
 5 -15 0 -47.9 58.29
 -5 15 0 65.29 52.59
 4 -15 0 18.9 61.19
 4 -15 0 61.49 51.29
 -4 15 0 -17.9 45.2
 3 -15 0 74.49 48.2
 3 -15 0 31.7 55.89
 -3 15 0 17 40.9
 2 -15 0 -42.6 26.4
 2 -15 0 5.5 41.9
 -2 15 0 26.4 40.8
 -2 15 0 24.5 35.5
 1 -15 0 31.4 36.2
 1 -15 0 -50.19 24.2
 -1 15 0 -3.2 32.5
 -1 15 0 27.9 38.2
 0 -15 0 -5 23.3
 0 -15 0 -10.9 29.6
 0 -15 0 9.2 31.6
 0 15 0 84.79 36.1
 0 15 0 15.2 32
 -1 -15 0 -15.6 29.4
 -1 -15 0 39 23
 1 15 0 25.6 29
 1 15 0 -29.8 32.4
 -2 -15 0 -19.3 21.6
 -2 -15 0 10 32.6
 -2 -15 0 44.3 38.2
 -2 -15 0 1.6 19.9
 2 15 0 58.09 43.3
 2 15 0 -0.9 32.2
 2 15 0 61.19 29
 -3 -15 0 31.7 38
 -3 -15 0 31.6 22
 -3 -15 0 -33.2 28.1
 3 15 0 -32.8 32.6
 3 15 0 -7.1 26.7
 -4 -15 0 -7.2 23.5
 -4 -15 0 -48.8 22.2
 -4 -15 0 17.7 27.6
 -4 -15 0 -40.5 36.9
 4 15 0 -9.3 36.9
 4 15 0 -17.7 24.6
 4 15 0 56.19 34.3
 -5 -15 0 54.09 49.9
 -5 -15 0 -9.5 24.4
 -5 -15 0 13.5 26
 -5 -15 0 -24.1 23.6
 5 15 0 -33.8 23.9
 5 15 0 38.5 23.1
 5 15 0 4.3 38.2
 -6 -15 0 24 25.1
 -6 -15 0 -2.7 29.2
 -6 -15 0 0.7 37.9
 -6 -15 0 -9.9 26.9
 -6 -15 0 18.2 23.2
 6 15 0 -29.6 22.2
 6 15 0 5.1 32.8
 6 15 0 -8.6 24.2
 6 15 0 19.9 40.6
 -7 -15 0 39 31.1
 -7 -15 0 -42.7 37.1
 -7 -15 0 -30.9 25.9
 -7 -15 0 -37 29.6
 7 15 0 -8.1 31.7
 7 15 0 -72.79 25.5
 7 15 0 54.49 42.3
 7 15 0 40.3 22.6
 -8 -15 0 -29.5 39.4
 -8 -15 0 4.8 30.8
 -8 -15 0 38 32.8
 -8 -15 0 -9.5 31.3
 -8 -15 0 -19.6 32.2
 8 15 0 40.5 30.1
 8 15 0 -72.79 42.3
 8 15 0 -39.3 22.2
 8 15 0 -3.2 34.9
 -9 -15 0 106.99 32.7
 -9 -15 0 -32.4 40.9
 -9 -15 0 -46.1 29.8
 -9 -15 0 25.5 38.1
 -9 -15 0 15.6 36.4
 9 15 0 12 35.9
 9 15 0 35.2 32.6
 9 15 0 -24.4 45.7
 -10 -15 0 -27.3 43.6
 -10 -15 0 -33.1 41.3
 -10 -15 0 45.7 35
 -10 -15 0 41.7 33.1
 -10 -15 0 -59.89 43.1
 10 15 0 16.7 64.19
 10 15 0 -6.4 37.2
 10 15 0 5.6 50.09
 -11 -15 0 -17.6 35.3
 -11 -15 0 17.6 51.79
 -11 -15 0 -13.9 48.5
 -11 -15 0 50.99 48.5
 -11 -15 0 66.89 41
 11 15 0 3.2 40.1
 11 15 0 20.3 38.2
 11 15 0 17 54.19
 -12 -15 0 38.7 38.9
 -12 -15 0 -41.7 52.19
 -12 -15 0 12.2 40.5
 -12 -15 0 -40.5 58.49
 -12 -15 0 66.39 53.29
 12 15 0 -10.7 43
 12 15 0 24.2 45.6
 12 15 0 -121.59 59.19
 12 15 0 -90.89 57.99
 -13 -15 0 44.4 45.3
 -13 -15 0 20.8 69.39
 -13 -15 0 -39.5 69.29
 -13 -15 0 67.59 59.29
 13 15 0 69.09 64.99
 13 15 0 -69.79 47.7
 13 15 0 -95.49 67.29
 13 15 0 58.49 55.69
 -14 -15 0 65.69 65.29
 -14 -15 0 -5.5 76.39
 -14 -15 0 28 74.19
 -14 -15 0 -33.3 48.5
 14 15 0 85.09 63.39
 14 15 0 -121.99 55.29
 14 15 0 -110.29 75.49
 14 15 0 -34.5 70.59
 4 -16 0 105.59 65.09
 4 -16 0 -70.69 69.29
 -4 16 0 60.49 56.09
 3 -16 0 -17 61.59
 3 -16 0 -21.9 52.49
 -3 16 0 -16.5 45.2
 2 -16 0 122.59 55.79
 -2 16 0 108.19 46.1
 -2 16 0 76.29 49.4
 1 -16 0 -59.89 82.89
 1 -16 0 67.29 32.9
 -1 16 0 29.8 47.1
 -1 16 0 23.6 40
 0 -16 0 -8.1 28.5
 0 -16 0 39 41.8
 0 16 0 45 37
 0 16 0 -52.09 41.9
 -1 -16 0 44.5 28.8
 -1 -16 0 64.79 40.2
 1 16 0 128.49 40.5
 1 16 0 124.19 48.4
 -2 -16 0 -4.3 34.5
 -2 -16 0 6.1 43.9
 -2 -16 0 10.4 26.8
 2 16 0 15.2 34.5
 -3 -16 0 82.19 25.5
 -3 -16 0 27.2 27.9
 -3 -16 0 45.1 37
 -3 -16 0 98.99 46
 3 16 0 43.5 32.4
 3 16 0 7.8 39.2
 -4 -16 0 121.09 30.8
 -4 -16 0 92.09 52.99
 -4 -16 0 109.99 28.6
 -4 -16 0 108.79 40.4
 4 16 0 57.69 31.7
 4 16 0 -5.7 38.1
 -5 -16 0 81.29 38.6
 -5 -16 0 129.39 31.7
 -5 -16 0 30.9 47.6
 -5 -16 0 48 31
 5 16 0 65.99 30.3
 5 16 0 -16.7 48.4
 5 16 0 193.08 45.1
 -6 -16 0 26 37.2
 -6 -16 0 29.5 31.7
 -6 -16 0 24.6 31.3
 -6 -16 0 51.09 46.8
 6 16 0 3.4 40.9
 6 16 0 -27.5 45.5
 6 16 0 0.3 27
 6 16 0 14.9 27.8
 -7 -16 0 19.4 30.2
 -7 -16 0 18.1 30.8
 -7 -16 0 23.6 32.7
 -7 -16 0 -62.09 33.8
 -7 -16 0 26.3 47.9
 7 16 0 4.3 29.4
 7 16 0 13.1 26.4
 7 16 0 -52.29 36.3
 7 16 0 69.29 50.19
 -8 -16 0 43.9 50.49
 -8 -16 0 -12.4 36.9
 -8 -16 0 -1.7 42
 -8 -16 0 30.6 34.5
 -8 -16 0 63.49 34.5
 8 16 0 112.89 51.09
 8 16 0 -2 43.1
 8 16 0 -11.1 32.4
 -9 -16 0 29.9 52.79
 -9 -16 0 44.8 35
 -9 -16 0 -2.4 51.39
 -9 -16 0 -80.29 38.8
 -9 -16 0 8.9 39
 9 16 0 53.09 45.5
 9 16 0 47.3 56.29
 9 16 0 39.7 36.7
 -10 -16 0 42 38.2
 -10 -16 0 -0.3 46.9
 -10 -16 0 22 37.2
 -10 -16 0 -79.39 44.9
 -10 -16 0 -51.79 52.79
 10 16 0 150.38 62.79
 10 16 0 -15.9 38.1
 10 16 0 36.5 44.5
 -11 -16 0 19 62.59
 -11 -16 0 48.7 55.39
 -11 -16 0 -80.39 56.49
 -11 -16 0 73.29 41.3
 -11 -16 0 11.9 40.5
 11 16 0 9 52.59
 11 16 0 5.4 60.09
 11 16 0 54.99 44.3
 -12 -16 0 82.09 46.2
 -12 -16 0 -50.29 62.49
 -12 -16 0 91.59 44.1
 -12 -16 0 37.9 66.89
 -12 -16 0 119.79 58.89
 12 16 0 -129.59 71.89
 12 16 0 50.69 49
 12 16 0 82.99 58.59
 -13 -16 0 37 78.39
 -13 -16 0 -60.19 69.29
 -13 -16 0 23.6 77.59
 -13 -16 0 20.6 49.9
 13 16 0 -70.39 74.59
 13 16 0 -9.5 60.59
 13 16 0 79.59 55.59
 2 -17 0 -167.48 72.59
 2 -17 0 35.5 59.19
 -2 17 0 -38.3 50.49
 1 -17 0 -6.9 54.99
 -1 17 0 -69.79 56.79
 -1 17 0 15 48
 0 -17 0 -18.8 58.19
 0 17 0 -18.8 43.3
 0 17 0 -27.5 52.49
 -1 -17 0 -4.8 42.1
 -1 -17 0 -47.7 48.2
 -1 -17 0 -26.1 32.6
 1 17 0 -65.89 47.5
 1 17 0 -29.8 39.6
 -2 -17 0 -24.8 31.8
 -2 -17 0 -14.4 39.8
 2 17 0 -15.5 47.8
 -3 -17 0 13.7 33.3
 -3 -17 0 -65.49 46.2
 -3 -17 0 -85.59 50.59
 3 17 0 58.09 44.7
 3 17 0 -64.29 35.8
 -4 -17 0 -148.59 70.09
 -4 -17 0 76.29 50.59
 4 17 0 9.1 45.6
 4 17 0 -9 35.9
 -5 -17 0 105.99 44.3
 -5 -17 0 34.5 35.6
 -5 -17 0 27.6 34.7
 -5 -17 0 29.2 56.09
 5 17 0 40.4 45.9
 5 17 0 -19.3 33.9
 -6 -17 0 18.8 35.8
 -6 -17 0 32.8 95.49
 -6 -17 0 2.2 35.7
 -6 -17 0 45.6 38
 6 17 0 88.79 50.09
 6 17 0 102.69 47
 -7 -17 0 20.7 58.89
 -7 -17 0 5.3 39
 -7 -17 0 14.8 36.7
 -7 -17 0 50.69 41.2
 7 17 0 -4.9 49.8
 7 17 0 -101.79 56.09
 -8 -17 0 -39.4 55.99
 -8 -17 0 72.39 43.9
 -8 -17 0 -27.9 43
 -8 -17 0 6.1 43.1
 8 17 0 -61.09 56.99
 8 17 0 -15.6 45.9
 8 17 0 35.4 40.8
 -9 -17 0 22.6 51.49
 -9 -17 0 -7.2 39.3
 -9 -17 0 -7.4 48.8
 -9 -17 0 28.3 61.19
 9 17 0 4.3 46.8
 9 17 0 10.4 41.4
 9 17 0 38.8 62.89
 -10 -17 0 39.3 66.29
 -10 -17 0 43.6 71.39
 -10 -17 0 34 42.5
 -10 -17 0 63.89 54.39
 -10 -17 0 50.59 46.6
 10 17 0 -14.6 55.49
 10 17 0 70.99 45.3
 -11 -17 0 -5.2 68.99
 -11 -17 0 16.9 47.7
 -11 -17 0 104.79 74.29
 -11 -17 0 -63.79 59.69
 11 17 0 -125.89 69.39
 11 17 0 60.59 52.69
 11 17 0 38.4 48.1
 -12 -17 0 5.6 50.19
 -12 -17 0 186.28 79.49
 -12 -17 0 -49.7 72.29
 -12 -17 0 2.7 75.79
 12 17 0 116.09 54.89
 12 17 0 141.69 66.79
 12 17 0 4.6 77.29
 0 -18 0 79.99 61.79
 0 18 0 31.7 54.59
 0 18 0 96.29 65.49
 -1 -18 0 108.99 63.89
 1 18 0 -12.6 59.09
 1 18 0 160.28 53.09
 -2 -18 0 -5.6 49.4
 -2 -18 0 11.1 50.09
 2 18 0 50.99 48.7
 2 18 0 41.7 65.79
 -3 -18 0 -33.9 55.99
 -3 -18 0 52.59 64.19
 -3 -18 0 28 40.4
 3 18 0 93.99 53.39
 3 18 0 -26.5 56.49
 -4 -18 0 -21.6 53.19
 -4 -18 0 14.7 63.29
 -4 -18 0 -29.6 40.9
 4 18 0 153.08 45.5
 4 18 0 127.29 57.29
 -5 -18 0 0.4 59.89
 -5 -18 0 38.4 67.39
 -5 -18 0 -71.69 38.6
 5 18 0 40.1 54.39
 -6 -18 0 -4.9 41.4
 -6 -18 0 -89.49 55.89
 -6 -18 0 -75.69 66.49
 6 18 0 62.69 54.39
 -7 -18 0 61.99 67.59
 -7 -18 0 64.49 70.89
 -7 -18 0 74.89 44.5
 7 18 0 246.88 58.99
 -8 -18 0 114.29 70.69
 -8 -18 0 54.79 45.1
 -8 -18 0 77.09 68.79
 -8 -18 0 104.99 79.99
 8 18 0 50.39 55.69
 -9 -18 0 41.7 55.19
 -9 -18 0 -138.59 71.49
 -9 -18 0 45.4 75.89
 -9 -18 0 -45.7 47
 9 18 0 -16.6 58.19
 -10 -18 0 49.6 61.49
 -10 -18 0 24.7 82.39
 -10 -18 0 90.29 62.09
 -10 -18 0 -53.09 76.49
 10 18 0 84.99 59.59
 -5 -19 0 -7.3 77.49
 -5 -19 0 -9.6 47.6
 5 19 0 -20.9 63.59
 -6 -19 0 -23.1 48.9
 -6 -19 0 -153.98 78.69
 -6 -19 0 -28.9 68.09
 6 19 -1 -47.1 63.49
 -6 -19 1 95.29 79.79
 -6 -19 1 -7.3 48.7
 -6 -19 1 110.69 54.99
 5 19 -1 36.3 63.69
 -5 -19 1 -63.09 46.3
 -5 -19 1 -68.49 74.39
 -5 -19 1 17 69.19
 10 18 -1 84.19 63.09
 -10 -18 1 35.5 62.49
 -10 -18 1 -33.3 78.89
 -10 -18 1 20.6 48.3
 -10 -18 1 140.09 53.79
 9 18 -1 88.79 65.59
 -9 -18 1 -47.1 72.19
 -9 -18 1 49.1 47.9
 -9 -18 1 29.2 56.49
 -9 -18 1 -35.1 56.29
 8 18 -1 56.59 63.19
 -8 -18 1 140.59 57.89
 -8 -18 1 78.49 46.5
 -8 -18 1 19.6 75.99
 -8 -18 1 50.69 52.49
 7 18 -1 6 59.59
 -7 -18 1 74.89 57.29
 -7 -18 1 -50.19 45.4
 -7 -18 1 -26.6 41
 -7 -18 1 18.4 70.39
 6 18 -1 120.49 54.19
 -6 -18 1 54.09 52.99
 -6 -18 1 6.8 47
 -6 -18 1 3.7 64.59
 5 18 -1 -3.1 52.59
 -5 -18 1 -16.2 39.4
 -5 -18 1 3.4 62.69
 -5 -18 1 101.89 59.69
 4 18 -1 3.6 54.89
 -4 -18 1 71.49 56.59
 -4 -18 1 78.59 62.09
 3 18 -1 71.99 59.99
 3 18 -1 16.6 46.1
 -3 -18 1 8.5 58.29
 -3 -18 1 7.6 58.79
 -3 -18 1 61.69 41.7
 2 18 -1 22.8 47.3
 2 18 -1 81.59 56.79
 -2 -18 1 -3.9 49.5
 -2 -18 1 45.4 67.99
 1 18 -1 45.5 59.09
 1 18 -1 25 48.4
 -1 -18 1 80.99 62.49
 0 18 -1 -14.1 62.39
 0 18 -1 -51.19 51.89
 0 -18 1 -80.89 64.59
 12 17 -1 -128.59 59.59
 12 17 -1 -12.9 53.79
 12 17 -1 -158.78 77.89
 -12 -17 1 -90.89 71.29
 -12 -17 1 54.59 75.29
 -12 -17 1 -48.4 48.4
 -12 -17 1 23.5 48.7
 11 17 -1 -49.5 56.29
 11 17 -1 -18.5 46.2
 11 17 -1 -54.49 70.59
 -11 -17 1 24.5 58.79
 -11 -17 1 13.9 47.1
 -11 -17 1 105.79 74.49
 -11 -17 1 -119.09 70.89
 -11 -17 1 52.49 43.9
 10 17 -1 3.1 50.89
 10 17 -1 141.59 50.79
 -10 -17 1 40.1 43.3
 -10 -17 1 -25.9 63.19
 -10 -17 1 55.09 53.29
 -10 -17 1 120.19 43.7
 9 17 -1 49.6 50.89
 9 17 -1 0.5 60.69
 9 17 -1 70.19 41.4
 -9 -17 1 50.59 62.59
 -9 -17 1 -82.79 46.4
 -9 -17 1 -1.8 39.7
 -9 -17 1 31.4 39
 8 17 -1 -32.1 47
 8 17 -1 20.7 58.09
 -8 -17 1 62.39 58.89
 -8 -17 1 -19.2 47
 -8 -17 1 -6.7 43.7
 -8 -17 1 72.19 40
 7 17 -1 -1.1 43.8
 -7 -17 1 61.59 36.8
 -7 -17 1 21.2 40.1
 -7 -17 1 9.2 69.09
 -7 -17 1 -11.8 40.6
 6 17 -1 -19.6 43.6
 -6 -17 1 -11.1 36.1
 -6 -17 1 28.8 57.69
 -6 -17 1 43.2 36.8
 -6 -17 1 32.2 55.69
 5 17 -1 99.09 36.7
 5 17 -1 219.38 48.6
 -5 -17 1 90.79 36.5
 -5 -17 1 145.09 49.99
 -5 -17 1 206.58 38.7
 -5 -17 1 264.37 60.59
 4 17 -1 -115.29 45.6
 4 17 -1 21.5 35.5
 -4 -17 1 20.6 57.39
 -4 -17 1 46.6 47.6
 -4 -17 1 -33.9 51.59
 -4 -17 1 23.1 45.5
 3 17 -1 -4.1 37.5
 3 17 -1 -45.6 45.4
 -3 -17 1 -33 32.2
 -3 -17 1 26.4 50.09
 -3 -17 1 -34.2 91.19
 2 17 -1 39.4 48.6
 2 17 -1 -10 41.3
 -2 -17 1 24.2 32.1
 -2 -17 1 39.5 41.4
 1 17 -1 -9.2 46.8
 1 17 -1 79.19 42.2
 -1 -17 1 50.49 51.39
 -1 -17 1 -42.5 31.7
 0 17 -1 -57.39 56.59
 0 17 -1 -24.9 43.7
 0 -17 1 -21.6 51.09
 -1 17 -1 24.2 47.6
 1 -17 1 -33.6 55.09
 -2 17 -1 -11 51.29
 2 -17 1 -0.8 55.49
 2 -17 1 6.6 70.79
 13 16 -1 30.5 60.39
 13 16 -1 -4.2 53.59
 13 16 -1 232.28 77.69
 -13 -16 1 126.49 50.19
 -13 -16 1 157.78 52.99
 -13 -16 1 63.19 77.99
 -13 -16 1 183.88 71.69
 -13 -16 1 82.59 65.49
 12 16 -1 4 65.59
 12 16 -1 87.59 49.4
 12 16 -1 94.49 52.89
 -12 -16 1 18.2 47.3
 -12 -16 1 123.49 66.19
 -12 -16 1 -3.4 56.89
 -12 -16 1 122.59 66.59
 -12 -16 1 -65.59 43.2
 11 16 -1 -27.6 45.7
 11 16 -1 30.7 44
 11 16 -1 76.59 61.29
 -11 -16 1 56.99 41.3
 -11 -16 1 21.1 42.8
 -11 -16 1 70.29 58.69
 -11 -16 1 12.9 59.19
 -11 -16 1 35.5 51.29
 10 16 -1 -7.5 46.4
 10 16 -1 60.79 59.39
 -10 -16 1 -4.1 36.1
 -10 -16 1 -55.39 55.09
 -10 -16 1 -16.1 35.4
 -10 -16 1 53.09 47.7
 -10 -16 1 91.89 48.1
 9 16 -1 3.6 39.3
 9 16 -1 27.1 35.7
 9 16 -1 -3.2 50.79
 -9 -16 1 40.1 39.2
 -9 -16 1 -69.09 50.29
 -9 -16 1 -2.9 30.2
 -9 -16 1 6 34.8
 -9 -16 1 2.6 57.19
 8 16 -1 -50.89 30.1
 8 16 -1 -2 38.4
 8 16 -1 -48.7 49.5
 -8 -16 1 -51.19 48.1
 -8 -16 1 27.4 38.3
 -8 -16 1 -10.9 29.4
 -8 -16 1 31.7 33
 -8 -16 1 -17 32.6
 7 16 -1 100.29 47.8
 7 16 -1 13.9 29.6
 7 16 -1 -39.7 36.9
 -7 -16 1 -24.3 27.9
 -7 -16 1 47.6 35.6
 -7 -16 1 26.4 30.7
 -7 -16 1 31.2 47.3
 -7 -16 1 41.8 32.1
 6 16 -1 20.2 26.3
 6 16 -1 -17.5 36.4
 6 16 -1 59.19 46.9
 -6 -16 1 45.4 32.6
 -6 -16 1 -46.1 51.29
 -6 -16 1 -29.7 37.1
 -6 -16 1 -26 27
 5 16 -1 -21.1 27.9
 5 16 -1 -8.9 37.1
 -5 -16 1 -10.6 35.8
 -5 -16 1 -11.1 44.2
 -5 -16 1 89.29 29.4
 -5 -16 1 13.7 29.2
 4 16 -1 8.3 29
 4 16 -1 117.79 40.9
 -4 -16 1 20.5 27.3
 -4 -16 1 39.8 38.1
 -4 -16 1 13.5 27.1
 3 16 -1 68.19 33.1
 -3 -16 1 83.09 44.4
 -3 -16 1 9.3 26.5
 -3 -16 1 114.19 45.4
 -3 -16 1 62.19 27.8
 2 16 -1 102.09 34.8
 2 16 -1 49.9 40
 -2 -16 1 63.19 28.5
 -2 -16 1 46.5 44.4
 -2 -16 1 179.18 43.9
 -2 -16 1 92.29 39.6
 1 16 -1 28.7 36.7
 1 16 -1 -6.4 41.3
 -1 -16 1 85.69 52.59
 -1 -16 1 21.4 26.3
 0 16 -1 71.49 39.5
 0 16 -1 52.99 42.8
 0 -16 1 152.78 47.9
 0 -16 1 94.09 29.4
 -1 16 -1 -22.3 39.4
 -1 16 -1 112.59 46.4
 1 -16 1 36 47.2
 -2 16 -1 8.3 46.1
 -2 16 -1 17.8 43.9
 2 -16 1 -87.99 45
 -3 16 -1 -7 46.4
 3 -16 1 0.7 52.29
 3 -16 1 63.89 60.69
 -4 16 -1 21.1 51.99
 4 -16 1 -28.2 66.39
 4 -16 1 -23.1 58.19
 14 15 -1 146.29 83.79
 14 15 -1 -122.49 68.69
 14 15 -1 7.8 55.99
 14 15 -1 55.79 60.09
 -14 -15 1 -26.9 62.79
 -14 -15 1 38.8 47.9
 -14 -15 1 139.39 51.19
 -14 -15 1 -24.8 75.29
 -14 -15 1 17.3 65.29
 13 15 -1 152.68 57.49
 13 15 -1 86.59 50.29
 13 15 -1 -51.99 64.09
 13 15 -1 36.2 71.19
 -13 -15 1 146.99 56.09
 -13 -15 1 41.5 44.9
 -13 -15 1 -19.3 68.89
 -13 -15 1 -2.2 42.8
 -13 -15 1 81.59 59.19
 12 15 -1 -6.2 43.2
 12 15 -1 43.8 64.39
 12 15 -1 61.79 49.3
 12 15 -1 -71.19 59.19
 -12 -15 1 82.59 37.2
 -12 -15 1 15.5 38.6
 -12 -15 1 21.3 52.29
 -12 -15 1 34.7 48.8
 -12 -15 1 -92.29 55.59
 11 15 -1 -15.2 62.69
 11 15 -1 21.1 38
 11 15 -1 28.1 41.6
 -11 -15 1 69.79 45.2
 -11 -15 1 117.59 50.89
 -11 -15 1 -73.99 47.6
 -11 -15 1 0.9 31.7
 -11 -15 1 36.4 36.6
 10 15 -1 91.09 51.39
 10 15 -1 68.79 42.1
 10 15 -1 45 40.3
 -10 -15 1 -15.1 42.7
 -10 -15 1 13.8 29
 -10 -15 1 -37.2 42
 -10 -15 1 45.8 42.8
 -10 -15 1 -14 32.5
 9 15 -1 55.79 45.8
 9 15 -1 -26.5 31.2
 9 15 -1 -23 33.6
 -9 -15 1 25.6 36.7
 -9 -15 1 -6.3 37.9
 -9 -15 1 69.09 32.6
 -9 -15 1 -87.69 40.4
 -9 -15 1 -1.4 28.6
 8 15 -1 -38.8 40.4
 8 15 -1 -9.8 32.6
 8 15 -1 -22.5 27.4
 -8 -15 1 2.7 25.4
 -8 -15 1 -49.8 38.9
 -8 -15 1 -23.3 32.7
 -8 -15 1 34.5 31.3
 -8 -15 1 2.4 27.7
 7 15 -1 -15.8 25.3
 7 15 -1 -4.2 21.4
 7 15 -1 11.5 31.7
 7 15 -1 -33.3 45.2
 -7 -15 1 -7.8 39
 -7 -15 1 10.1 25.7
 -7 -15 1 3.4 24.4
 -7 -15 1 6.5 30.3
 6 15 -1 -4.9 22.4
 6 15 -1 -0.2 38.5
 6 15 -1 1.1 22.5
 -6 -15 1 13 22.8
 -6 -15 1 20.2 24.2
 -6 -15 1 15.1 27.9
 -6 -15 1 32.4 40.5
 -6 -15 1 -4.1 24.8
 5 15 -1 64.69 25.5
 5 15 -1 68.79 41.1
 5 15 -1 84.59 24.6
 5 15 -1 65.89 37.3
 -5 -15 1 59.69 31.4
 -5 -15 1 78.59 25.4
 -5 -15 1 94.79 29.1
 -5 -15 1 75.59 43.7
 4 15 -1 100.49 37.2
 4 15 -1 75.89 27.7
 4 15 -1 18.3 39.4
 -4 -15 1 113.69 26.3
 -4 -15 1 117.79 40.1
 -4 -15 1 36.1 25.1
 -4 -15 1 121.69 34.9
 3 15 -1 91.99 29.1
 3 15 -1 36.9 32.6
 3 15 -1 65.69 33.4
 -3 -15 1 52.09 34.6
 -3 -15 1 51.69 23.9
 -3 -15 1 91.79 24.4
 -3 -15 1 91.59 37.8
 2 15 -1 -10.5 33.2
 2 15 -1 58.99 28.1
 -2 -15 1 7.1 21.7
 -2 -15 1 23.7 34.5
 -2 -15 1 12.6 21.5
 -2 -15 1 14.8 29.1
 1 15 -1 70.79 33.5
 1 15 -1 -18.2 28.9
 -1 -15 1 24 38.3
 -1 -15 1 29.3 21.6
 -1 -15 1 -21.3 18.9
 0 15 -1 27.3 31
 0 15 -1 17.4 36.8
 0 -15 1 33 37.8
 0 -15 1 -23.8 36.1
 0 -15 1 -0.8 21.2
 -1 15 -1 -61.79 35.4
 -1 15 -1 -8.2 33.2
 1 -15 1 -2.2 23.2
 1 -15 1 35.9 36.3
 -2 15 -1 -9 35.6
 -2 15 -1 -23.6 40.2
 2 -15 1 -19.9 37.3
 -3 15 -1 -8.2 39.9
 3 -15 1 24.1 54.59
 3 -15 1 -26 42.4
 -4 15 -1 77.19 47.3
 4 -15 1 -30.4 56.39
 4 -15 1 -0.8 50.79
 -5 15 -1 26.7 53.09
 5 -15 1 -1.7 59.69
 5 -15 1 -12.3 55.29
 15 14 -1 60.49 90.49
 15 14 -1 23.1 67.59
 -15 -14 1 80.99 83.89
 -15 -14 1 14.4 49.4
 14 14 -1 19.6 63.69
 14 14 -1 43.4 58.79
 14 14 -1 -3.4 74.59
 14 14 -1 20.1 52.29
 -14 -14 1 19.7 45.2
 -14 -14 1 25.8 74.19
 -14 -14 1 31.5 52.69
 -14 -14 1 -12.8 50.79
 -14 -14 1 22.4 44
 13 14 -1 -64.79 44.7
 13 14 -1 -33.9 46.8
 13 14 -1 -66.09 56.49
 13 14 -1 57.79 64.39
 -13 -14 1 10.3 39.9
 -13 -14 1 35.1 40.3
 -13 -14 1 112.29 60.69
 -13 -14 1 -23.8 44.9
 -13 -14 1 45.9 63.99
 12 14 -1 62.79 41.3
 12 14 -1 -4.9 57.19
 12 14 -1 54.19 52.59
 12 14 -1 80.19 43.6
 -12 -14 1 33.6 34.6
 -12 -14 1 4 50.49
 -12 -14 1 70.79 34.4
 -12 -14 1 113.69 55.29
 -12 -14 1 53.59 44.2
 11 14 -1 64.99 36.1
 11 14 -1 80.69 40.3
 11 14 -1 -32.1 57.99
 11 14 -1 41.2 32.7
 11 14 -1 -83.49 52.99
 -11 -14 1 34.4 38.4
 -11 -14 1 48 46.7
 -11 -14 1 23.5 32.7
 -11 -14 1 9.6 30.8
 -11 -14 1 -54.69 36.1
 10 14 -1 100.89 34
 10 14 -1 46.8 36.2
 10 14 -1 35.1 43.4
 10 14 -1 105.69 26.3
 -10 -14 1 4.6 37.9
 -10 -14 1 78.69 30.5
 -10 -14 1 36.8 38.6
 -10 -14 1 70.29 33.8
 9 14 -1 -52.49 37.9
 9 14 -1 8.1 27.8
 9 14 -1 21.3 20.9
 9 14 -1 24.3 28
 -9 -14 1 27.6 34.4
 -9 -14 1 8.2 33.4
 -9 -14 1 8 25.3
 -9 -14 1 23.7 25.9
 -9 -14 1 -8.1 30.5
 8 14 -1 40 28.6
 8 14 -1 1.1 25.3
 8 14 -1 -34.7 35.6
 -8 -14 1 -5.8 26.8
 -8 -14 1 -24.7 29.4
 -8 -14 1 -2.8 44.6
 -8 -14 1 16.3 29.4
 -8 -14 1 -9.2 24
 7 14 -1 -42.5 34.2
 7 14 -1 9.5 30.7
 7 14 -1 -20.7 22.6
 7 14 -1 30.5 22.6
 7 14 -1 -3.2 20.1
 -7 -14 1 7.3 27.1
 -7 -14 1 -85.19 34.6
 -7 -14 1 -3.6 21.9
 -7 -14 1 -41.1 23.3
 6 14 -1 46.8 25.1
 6 14 -1 2.7 21
 6 14 -1 32 26.8
 6 14 -1 19.4 20
 6 14 -1 -7.8 19.9
 6 14 -1 -76.19 31.5
 -6 -14 1 18.3 20.4
 -6 -14 1 49.7 32
 -6 -14 1 10.8 24.1
 -6 -14 1 -38.3 32.2
 -6 -14 1 20.9 21
 5 14 -1 45.6 32.7
 5 14 -1 47 18.1
 5 14 -1 79.69 20.6
 5 14 -1 5.9 25.6
 5 14 -1 50.99 21.5
 5 14 -1 41.3 20.8
 -5 -14 1 62.69 21.4
 -5 -14 1 58.39 31.2
 -5 -14 1 5.3 30
 -5 -14 1 60.39 31.3
 -5 -14 1 14.9 22.9
 4 14 -1 10.8 31.6
 4 14 -1 -0.7 26.9
 4 14 -1 21.8 21.6
 4 14 -1 12.9 25.1
 4 14 -1 35.2 24.7
 4 14 -1 38.8 15.8
 -4 -14 1 32 29.4
 -4 -14 1 33.1 21.9
 -4 -14 1 84.19 35.1
 -4 -14 1 0.5 27.3
 -4 -14 1 14.4 19.4
 3 14 -1 53.19 23.8
 3 14 -1 65.49 24.1
 3 14 -1 112.29 30.8
 3 14 -1 59.59 28.5
 -3 -14 1 111.39 31.7
 -3 -14 1 88.79 27.4
 -3 -14 1 57.89 30.5
 -3 -14 1 71.19 20.9
 -3 -14 1 53.69 20.3
 2 14 -1 23 23.2
 2 14 -1 -33.2 22
 2 14 -1 -49.99 25.2
 2 14 -1 -32.5 29.3
 -2 -14 1 1.3 23.5
 -2 -14 1 -4.2 21.6
 -2 -14 1 17.6 18.5
 -2 -14 1 7.9 28.5
 -2 -14 1 10.6 17.7
 1 14 -1 153.68 32.4
 1 14 -1 149.79 29.5
 1 14 -1 128.69 32.9
 -1 -14 1 48.3 24.8
 -1 -14 1 137.09 42.6
 -1 -14 1 50.89 22.6
 -1 -14 1 157.28 32.6
 -1 -14 1 112.99 21.4
 -1 -14 1 80.89 19.4
 0 14 -1 40.4 26.5
 0 14 -1 27.2 29.2
 0 -14 1 54.79 17.8
 0 -14 1 31.3 24.4
 0 -14 1 59.19 24
 0 -14 1 18.8 18.9
 -1 14 -1 117.99 33.2
 -1 14 -1 104.49 33.9
 1 -14 1 37.8 25.6
 1 -14 1 86.99 21.6
 -2 14 -1 109.19 39.5
 -2 14 -1 104.09 35.3
 2 -14 1 56.29 22.7
 -3 14 -1 23.9 36.5
 3 -14 1 -15.6 28.1
 3 -14 1 39 48.3
 3 -14 1 -16.8 41.9
 -4 14 -1 104.69 41.2
 4 -14 1 -32.5 39
 4 -14 1 36.9 49.2
 -5 14 -1 51.69 43.4
 5 -14 1 2.8 53.09
 5 -14 1 114.39 49.1
 -6 14 -1 8.6 68.79
 6 -14 1 -9 51.99
 6 -14 1 28.8 55.59
 15 13 -1 28.4 60.59
 15 13 -1 114.29 69.59
 15 13 -1 61.69 58.69
 15 13 -1 -60.89 70.69
 -15 -13 1 37.6 64.19
 -15 -13 1 49.8 75.19
 -15 -13 1 -26.4 55.69
 -15 -13 1 36.7 49.3
 14 13 -1 68.49 62.09
 14 13 -1 -31.1 51.59
 14 13 -1 53.39 48.4
 14 13 -1 9.1 61.49
 -14 -13 1 59.79 41.5
 -14 -13 1 -1.1 41.6
 -14 -13 1 75.09 50.49
 -14 -13 1 122.09 65.39
 -14 -13 1 -13.4 46.9
 13 13 -1 7.2 61.89
 13 13 -1 -20.4 50.79
 13 13 -1 -36.3 40.8
 13 13 -1 107.49 45
 -13 -13 1 18.1 42.2
 -13 -13 1 65.99 48.2
 -13 -13 1 48.4 44.5
 -13 -13 1 -6.5 35
 -13 -13 1 31.6 53.99
 12 13 -1 88.29 40.5
 12 13 -1 -114.49 44.3
 12 13 -1 25.9 52.09
 12 13 -1 54.79 53.89
 -12 -13 1 -34.7 36.2
 -12 -13 1 6.9 35.9
 -12 -13 1 9.1 46.1
 -12 -13 1 0.8 33.9
 11 13 -1 11.4 42.8
 11 13 -1 44.1 50.99
 11 13 -1 51.59 33.5
 11 13 -1 21.1 33.5
 -11 -13 1 2.7 33.1
 -11 -13 1 26.2 39.9
 -11 -13 1 -12.8 27.1
 -11 -13 1 -1.9 27
 -11 -13 1 -31.3 32.2
 10 13 -1 -23.9 29.4
 10 13 -1 59.69 38.7
 10 13 -1 -27.5 27.8
 10 13 -1 -28.9 42.9
 -10 -13 1 -11.9 28.8
 -10 -13 1 16.2 24.1
 -10 -13 1 42.7 44.2
 -10 -13 1 59.99 35
 -10 -13 1 12.8 27.2
 9 13 -1 56.89 18.6
 9 13 -1 10.5 43.6
 9 13 -1 60.49 27.5
 9 13 -1 57.19 36.7
 9 13 -1 35.8 28.6
 -9 -13 1 27.7 30.7
 -9 -13 1 96.29 31.6
 -9 -13 1 52.79 23.7
 -9 -13 1 92.69 31
 8 13 -1 20.6 23.7
 8 13 -1 6 26.3
 8 13 -1 -16.6 13.1
 8 13 -1 67.79 32.9
 8 13 -1 -16.2 28.2
 -8 -13 1 -15.3 24.2
 -8 -13 1 -9.8 20.1
 -8 -13 1 -23.8 41.1
 -8 -13 1 -35.2 26
 -8 -13 1 56.89 25.4
 -8 -13 1 -18.3 26
 7 13 -1 -6 21.5
 7 13 -1 3.1 19.2
 7 13 -1 26 14.4
 7 13 -1 17.8 29.5
 7 13 -1 9.8 21.3
 -7 -13 1 -30 31.6
 -7 -13 1 11.2 23.1
 -7 -13 1 13 19.4
 -7 -13 1 32.2 26.2
 -7 -13 1 -18.8 19.9
 -7 -13 1 10.9 19.5
 6 13 -1 21.6 23.3
 6 13 -1 -45.8 25.7
 6 13 -1 -5.2 16.9
 6 13 -1 11.1 15.6
 6 13 -1 -2 18.7
 6 13 -1 26.7 22.6
 -6 -13 1 10.5 17.6
 -6 -13 1 -14.5 17.6
 -6 -13 1 2.4 18.9
 -6 -13 1 16 29.8
 -6 -13 1 -2.2 21.4
 -6 -13 1 -34.6 24.8
 5 13 -1 22.7 26.8
 5 13 -1 30.3 19.2
 5 13 -1 12.5 21.5
 5 13 -1 -15.2 16.3
 5 13 -1 -9.2 24.7
 5 13 -1 0.7 15
 5 13 -1 -19.5 16.9
 -5 -13 1 -1.3 15.4
 -5 -13 1 3.3 25.8
 -5 -13 1 9.4 20.4
 -5 -13 1 4.4 16.8
 -5 -13 1 3.4 24.1
 -5 -13 1 19.1 20.8
 4 13 -1 -34.6 24
 4 13 -1 53.59 27.6
 4 13 -1 -1.7 17.1
 4 13 -1 30.6 21.5
 4 13 -1 1.3 14.9
 -4 -13 1 0.4 23.9
 -4 -13 1 15.6 19.6
 -4 -13 1 19.3 24.6
 -4 -13 1 7.6 20.6
 -4 -13 1 -20.4 15.6
 3 13 -1 197.98 28.1
 3 13 -1 214.58 28.9
 3 13 -1 236.38 33.1
 3 13 -1 207.58 32.3
 -3 -13 1 212.48 32.8
 -3 -13 1 272.37 38.8
 -3 -13 1 190.08 30.1
 -3 -13 1 191.98 25.1
 -3 -13 1 218.98 40.1
 -3 -13 1 237.38 27.5
 2 13 -1 71.89 25.5
 2 13 -1 -8.5 20.1
 2 13 -1 -1.5 23.8
 2 13 -1 38.4 21.7
 -2 -13 1 75.69 20.7
 -2 -13 1 72.39 26.3
 -2 -13 1 56.29 23.7
 -2 -13 1 41.4 21.1
 -2 -13 1 45.7 16.5
 -2 -13 1 44.6 17
 1 13 -1 6.7 24.8
 1 13 -1 36.6 25.1
 1 13 -1 8.5 20.4
 1 13 -1 36.1 18.7
 -1 -13 1 17.5 18
 -1 -13 1 35.9 24.5
 -1 -13 1 1.1 22.9
 -1 -13 1 -13.3 17.8
 -1 -13 1 -4.7 14.9
 -1 -13 1 13.4 15.1
 0 13 -1 -28.7 24.5
 0 13 -1 -27.3 23.5
 0 13 -1 -27.3 22
 0 -13 1 15.5 19.2
 0 -13 1 12.8 25
 0 -13 1 21.1 15.2
 0 -13 1 13.6 15.2
 0 -13 1 -0.1 16.8
 -1 13 -1 -20.8 23.7
 -1 13 -1 6 25.4
 -1 13 -1 63.79 25.3
 1 -13 1 1.3 15.9
 1 -13 1 -7.4 15
 1 -13 1 -29.9 19.2
 1 -13 1 27.1 25.6
 -2 13 -1 1.5 28.2
 -2 13 -1 1.3 26.6
 -2 13 -1 12 27.4
 2 -13 1 -0.8 14.3
 2 -13 1 36.3 30.1
 2 -13 1 -0.4 16.8
 -3 13 -1 15.7 47.9
 -3 13 -1 8.6 42.7
 3 -13 1 15 19.5
 3 -13 1 10.6 31.6
 3 -13 1 18.5 43.1
 3 -13 1 56.39 19.5
 -4 13 -1 -33.8 32.2
 4 -13 1 9.2 34.1
 4 -13 1 10.9 22.6
 4 -13 1 -42.8 22.2
 -5 13 -1 8.6 35.4
 5 -13 1 -15.8 38.6
 5 -13 1 -28 26.1
 5 -13 1 48.7 44.6
 -6 13 -1 26.9 40.7
 6 -13 1 -22.4 33.1
 6 -13 1 -44.5 48.1
 6 -13 1 15.2 45.3
 -7 13 -1 36.5 66.69
 7 -13 1 -9 60.49
 7 -13 1 34.5 49.6
 -8 13 -1 -57.69 74.59
 8 -13 1 79.99 70.69
 16 12 -1 136.49 71.39
 16 12 -1 173.18 65.39
 16 12 -1 -16.7 74.49
 -16 -12 1 -20 84.19
 -16 -12 1 -66.49 48.4
 -16 -12 1 43.3 62.29
 15 12 -1 222.18 78.99
 15 12 -1 40.6 56.09
 15 12 -1 28.1 55.19
 15 12 -1 -33.6 60.59
 -15 -12 1 14.5 42.9
 -15 -12 1 43.4 51.19
 -15 -12 1 -169.28 72.89
 -15 -12 1 21.1 42.2
 14 12 -1 -4.8 50.69
 14 12 -1 52.79 62.69
 14 12 -1 60.79 46.6
 14 12 -1 65.69 47.1
 -14 -12 1 -48.9 41.1
 -14 -12 1 -76.09 54.09
 -14 -12 1 100.49 36.6
 -14 -12 1 30.8 45.3
 -14 -12 1 49 38.4
 13 12 -1 -33.7 39.9
 13 12 -1 17.5 39
 13 12 -1 -56.19 44.6
 13 12 -1 48.3 52.39
 -13 -12 1 -17.9 30.3
 -13 -12 1 -116.39 47.5
 -13 -12 1 26.2 32.6
 -13 -12 1 40.2 44.8
 -13 -12 1 -21 37.2
 12 12 -1 -49.8 39.6
 12 12 -1 -5.2 46.9
 12 12 -1 15.6 34.3
 12 12 -1 40.9 35.1
 -12 -12 1 -10.4 33.9
 -12 -12 1 12.3 60.59
 -12 -12 1 -50.89 26.4
 -12 -12 1 8.1 33.7
 -12 -12 1 11.1 27.5
 11 12 -1 -14.8 36.9
 11 12 -1 13.1 28.6
 11 12 -1 13.4 43.5
 -11 -12 1 -5 34
 -11 -12 1 5.8 23.1
 -11 -12 1 0.2 28.5
 -11 -12 1 4.1 24.9
 -11 -12 1 14.7 49.8
 10 12 -1 5.4 35
 10 12 -1 -4.6 36.1
 10 12 -1 5.7 42.7
 10 12 -1 34.8 26.9
 10 12 -1 52.69 22.1
 -10 -12 1 51.69 29.5
 -10 -12 1 54.99 25.6
 -10 -12 1 57.69 36.8
 -10 -12 1 33.9 30
 9 12 -1 46.3 24.6
 9 12 -1 73.19 34.2
 9 12 -1 -7.1 31.1
 9 12 -1 12.6 22.6
 9 12 -1 43.9 19.1
 -9 -12 1 68.59 24
 -9 -12 1 36.9 27.4
 -9 -12 1 33.8 21.4
 -9 -12 1 30.2 25.9
 -9 -12 1 75.39 27.2
 8 12 -1 31.1 23.6
 8 12 -1 -27.5 26
 8 12 -1 34.8 22.2
 8 12 -1 26.6 33.3
 8 12 -1 14.4 15.6
 8 12 -1 0.1 22.2
 -8 -12 1 30.9 21.5
 -8 -12 1 -46.7 32.8
 -8 -12 1 5.9 21.4
 -8 -12 1 -12.2 18.6
 -8 -12 1 55.79 25.8
 -8 -12 1 6.2 18
 7 12 -1 6.5 18.3
 7 12 -1 14.7 25.7
 7 12 -1 32.7 10.6
 7 12 -1 -4.4 18.9
 7 12 -1 25 12.5
 7 12 -1 -14.1 12.1
 7 12 -1 -9.6 19.1
 -7 -12 1 24.1 21.3
 -7 -12 1 43.4 27.7
 -7 -12 1 17.9 21.5
 -7 -12 1 -11.8 17.1
 -7 -12 1 -10 17.6
 -7 -12 1 -13.2 18.6
 6 12 -1 6.1 19.3
 6 12 -1 23.4 14.9
 6 12 -1 14 17.1
 6 12 -1 -15.9 22.4
 6 12 -1 6.7 16
 6 12 -1 -8.8 19.6
 -6 -12 1 16.2 15.9
 -6 -12 1 -4.1 15.7
 -6 -12 1 12.6 20.2
 -6 -12 1 -3.6 19.4
 -6 -12 1 32.2 25.8
 -6 -12 1 -16.3 15.7
 5 12 -1 0.7 14.4
 5 12 -1 15.1 13.2
 5 12 -1 32.5 15.7
 5 12 -1 -6.3 23.2
 5 12 -1 33 21.4
 5 12 -1 0 17
 5 12 -1 12.7 19.5
 -5 -12 1 -3.3 14
 -5 -12 1 33 23.1
 -5 -12 1 -47.1 16.7
 -5 -12 1 -8.1 14.2
 -5 -12 1 -11 17.6
 -5 -12 1 -14.8 19.1
 4 12 -1 54.19 14
 4 12 -1 69.09 17.1
 4 12 -1 41.6 23.5
 4 12 -1 72.49 21.9
 4 12 -1 96.19 16.5
 4 12 -1 65.39 16.5
 4 12 -1 43.6 21.6
 -4 -12 1 51.69 18.7
 -4 -12 1 100.19 23.4
 -4 -12 1 68.99 23.5
 -4 -12 1 68.99 18.9
 -4 -12 1 58.59 16.3
 -4 -12 1 53.29 22.2
 -4 -12 1 63.49 13.7
 3 12 -1 39.6 21.5
 3 12 -1 36.9 18
 3 12 -1 9.7 12
 3 12 -1 20.7 22.2
 3 12 -1 15.3 16.4
 -3 -12 1 3.4 16.8
 -3 -12 1 1.7 13.2
 -3 -12 1 24.4 16.9
 -3 -12 1 -22.2 18.4
 -3 -12 1 12.1 15.2
 -3 -12 1 10.7 21.1
 2 12 -1 -1.7 19.3
 2 12 -1 25.4 16.3
 2 12 -1 -5.7 20.4
 2 12 -1 -7.7 16.8
 -2 -12 1 -24.9 15.6
 -2 -12 1 -1 13
 -2 -12 1 11.2 17.2
 -2 -12 1 -31.3 22.6
 -2 -12 1 8.6 18.4
 -2 -12 1 2.3 14.3
 1 12 -1 84.59 21.3
 1 12 -1 82.39 18
 1 12 -1 29.5 20.9
 1 12 -1 44.4 22.4
 -1 -12 1 97.39 23.3
 -1 -12 1 83.39 15.5
 -1 -12 1 46.1 15.3
 -1 -12 1 64.99 17.7
 -1 -12 1 39.8 17.3
 -1 -12 1 103.79 22.7
 0 12 -1 -0.3 20.2
 0 12 -1 21.4 24.6
 0 12 -1 4 21.1
 0 12 -1 0.8 20
 0 -12 1 -11.1 15.3
 0 -12 1 9.8 20.5
 0 -12 1 -12 12
 0 -12 1 0.8 12.1
 0 -12 1 14 14.3
 0 -12 1 -1.4 19.3
 -1 12 -1 41.1 19.7
 -1 12 -1 22.5 21.9
 -1 12 -1 15.8 26.6
 -1 12 -1 28.4 20.7
 1 -12 1 2.9 20.3
 1 -12 1 14.5 13.2
 1 -12 1 41.2 21.9
 1 -12 1 32.5 17.3
 1 -12 1 10.2 16.8
 -2 12 -1 26.8 22.1
 -2 12 -1 5.2 17.2
 -2 12 -1 16.2 23.1
 -2 12 -1 4.7 22.5
 2 -12 1 -14.8 12.3
 2 -12 1 -11.8 12.9
 2 -12 1 -19.7 14.5
 2 -12 1 76.39 33.3
 2 -12 1 -12 16.7
 2 -12 1 -2.8 20.8
 -3 12 -1 78.99 27.5
 -3 12 -1 18.2 25.1
 3 -12 1 41.8 23.8
 3 -12 1 32.6 16
 3 -12 1 38.7 25.8
 3 -12 1 61.29 18.3
 3 -12 1 44.8 18.6
 3 -12 1 39.8 18.7
 4 -12 1 -4.7 30.4
 4 -12 1 -6.7 20.6
 4 -12 1 3.7 26.8
 4 -12 1 -34.3 34.6
 4 -12 1 -7.6 17.4
 4 -12 1 -39.4 29.1
 -5 12 -1 3.2 33.1
 5 -12 1 24.6 20.9
 5 -12 1 58.79 29.9
 5 -12 1 25.2 41.3
 5 -12 1 16.3 21.5
 5 -12 1 21.9 31.6
 -6 12 -1 17.1 36.2
 6 -12 1 36.9 37.4
 6 -12 1 9.2 43.3
 6 -12 1 19.9 28.4
 -7 12 -1 12 56.19
 7 -12 1 66.29 56.19
 7 -12 1 -6.6 40.4
 7 -12 1 -70.79 32.7
 -8 12 -1 -159.48 61.79
 8 -12 1 12.6 42
 8 -12 1 11.6 59.89
 -9 12 -1 44.1 74.59
 9 -12 1 -59.09 68.59
 9 -12 1 -23.1 51.99
 16 11 -1 98.79 59.19
 16 11 -1 -43.9 75.79
 16 11 -1 -66.89 64.39
 16 11 -1 8.1 68.79
 -16 -11 1 5.6 75.79
 -16 -11 1 -110.69 51.09
 -16 -11 1 -26.1 46.9
 15 11 -1 -45.2 47.5
 15 11 -1 108.99 60.39
 15 11 -1 18.4 53.29
 15 11 -1 108.69 51.69
 -15 -11 1 109.59 42.7
 -15 -11 1 12.6 47.7
 -15 -11 1 81.69 72.89
 -15 -11 1 0.1 60.89
 14 11 -1 -81.19 43
 14 11 -1 -41 42
 14 11 -1 43.1 54.19
 14 11 -1 71.29 44.2
 -14 -11 1 -39.6 51.19
 -14 -11 1 47.6 43.3
 -14 -11 1 70.49 34
 -14 -11 1 -14.9 43.3
 -14 -11 1 -27.8 34.1
 13 11 -1 19.4 38.5
 13 11 -1 -29.6 43.9
 13 11 -1 4.2 43.1
 13 11 -1 -1.7 35.6
 -13 -11 1 24.6 29.8
 -13 -11 1 55.49 47
 -13 -11 1 29.1 33.4
 -13 -11 1 52.69 31.1
 -13 -11 1 60.49 36.6
 12 11 -1 18.7 33.4
 12 11 -1 75.69 41.1
 12 11 -1 -1.2 33.9
 -12 -11 1 43.4 25.9
 -12 -11 1 11 50.89
 -12 -11 1 -25.6 25.1
 -12 -11 1 58.69 31
 -12 -11 1 1.5 33.2
 11 11 -1 8.6 34.5
 11 11 -1 -14.3 28.4
 -11 -11 1 13.1 30.3
 -11 -11 1 95.39 45.2
 -11 -11 1 21.6 23.6
 -11 -11 1 14.4 22.4
 10 11 -1 32.9 20.5
 10 11 -1 29.2 25.5
 10 11 -1 4.9 29.4
 10 11 -1 15.3 35.4
 10 11 -1 13.7 22.5
 -10 -11 1 -11.8 24.4
 -10 -11 1 -9 20.5
 -10 -11 1 34.8 25.5
 -10 -11 1 23.1 27.2
 -10 -11 1 -1.2 19.6
 9 11 -1 45.9 33.9
 9 11 -1 37.7 21.8
 9 11 -1 28.1 18.2
 9 11 -1 37.3 21
 9 11 -1 -2.4 26.5
 -9 -11 1 95.29 25.4
 -9 -11 1 52.29 24.5
 -9 -11 1 85.99 24.6
 -9 -11 1 22 18
 -9 -11 1 56.49 20.6
 8 11 -1 -42.6 17.4
 8 11 -1 -9.8 13.6
 8 11 -1 4.8 20
 8 11 -1 -11.4 24.2
 8 11 -1 22.4 25.9
 8 11 -1 -8.4 18.8
 -8 -11 1 -5.2 16
 -8 -11 1 -6.8 20
 -8 -11 1 -23.6 29.2
 -8 -11 1 5.7 16.5
 -8 -11 1 21.5 21.1
 -8 -11 1 -7.5 17.3
 7 11 -1 24.2 10.1
 7 11 -1 18 18.9
 7 11 -1 30.1 27.7
 7 11 -1 34.5 18
 7 11 -1 22.2 17.1
 7 11 -1 37.6 23.2
 7 11 -1 32.9 13.3
 -7 -11 1 42.8 19.7
 -7 -11 1 51.39 19
 -7 -11 1 20.6 24.4
 -7 -11 1 49.9 20.1
 -7 -11 1 55.69 17.4
 -7 -11 1 47.1 16.7
 6 11 -1 -1.9 10.4
 6 11 -1 -6.4 16.4
 6 11 -1 18.1 20.6
 6 11 -1 15.1 15.1
 6 11 -1 0.8 20.7
 6 11 -1 24.4 16.2
 6 11 -1 28.8 16
 -6 -11 1 12.9 21.6
 -6 -11 1 13.4 14.7
 -6 -11 1 20.1 14.3
 -6 -11 1 -6 16.1
 -6 -11 1 33.5 16.3
 -6 -11 1 41.4 18.4
 5 11 -1 6.9 14.6
 5 11 -1 4 14.9
 5 11 -1 8.9 16.9
 5 11 -1 -3.2 13.9
 5 11 -1 -1.8 12.6
 5 11 -1 3.5 19.5
 5 11 -1 -1.9 14.4
 -5 -11 1 24.5 17.5
 -5 -11 1 -5.3 14.8
 -5 -11 1 22.5 19
 -5 -11 1 12.1 12.4
 -5 -11 1 6.9 18.5
 -5 -11 1 6.7 13.1
 -5 -11 1 42.1 18.2
 4 11 -1 254.97 33.6
 4 11 -1 223.68 23.8
 4 11 -1 174.58 21.3
 4 11 -1 192.48 25.3
 4 11 -1 187.28 22.2
 4 11 -1 170.18 24.2
 4 11 -1 178.78 22.9
 -4 -11 1 193.18 27.1
 -4 -11 1 186.28 22.8
 -4 -11 1 171.68 21.5
 -4 -11 1 223.78 26
 -4 -11 1 215.68 26.8
 -4 -11 1 209.28 26.5
 -4 -11 1 176.48 24.2
 3 11 -1 140.09 24.1
 3 11 -1 132.19 16.9
 3 11 -1 101.69 19.7
 3 11 -1 182.88 19.3
 3 11 -1 208.48 22.3
 3 11 -1 184.28 24.8
 3 11 -1 124.69 16.4
 -3 -11 1 140.99 25.8
 -3 -11 1 132.29 20.4
 -3 -11 1 117.59 18.9
 -3 -11 1 121.59 20
 -3 -11 1 90.69 46.7
 -3 -11 1 157.18 24.1
 -3 -11 1 173.28 19.2
 -3 -11 1 134.59 23.3
 2 11 -1 95.89 21
 2 11 -1 65.29 16.3
 2 11 -1 63.79 21.1
 2 11 -1 74.59 17.9
 2 11 -1 87.39 20.9
 -2 -11 1 81.89 19.6
 -2 -11 1 65.29 15.8
 -2 -11 1 46.5 27.2
 -2 -11 1 60.19 25.9
 -2 -11 1 70.59 18.6
 -2 -11 1 54.19 13.2
 -2 -11 1 92.69 19.2
 -2 -11 1 85.69 15.5
 1 11 -1 0.3 16.3
 1 11 -1 0.1 15.3
 1 11 -1 25.3 14.4
 1 11 -1 -6.8 15.4
 1 11 -1 -20.2 16.3
 -1 -11 1 -15 16.1
 -1 -11 1 13.2 14.2
 -1 -11 1 -21.7 13.4
 -1 -11 1 7.2 12.6
 -1 -11 1 7.5 16.7
 -1 -11 1 -3.3 10.4
 -1 -11 1 11.8 11.6
 0 11 -1 218.68 25.4
 0 11 -1 242.88 30.6
 0 11 -1 259.37 31.1
 0 -11 1 163.08 23.2
 0 -11 1 258.17 22.2
 0 -11 1 175.88 24.8
 0 -11 1 177.98 24.6
 0 -11 1 263.57 30.3
 0 -11 1 203.08 28.1
 0 -11 1 230.98 26.6
 -1 11 -1 39.8 19.7
 -1 11 -1 15.2 18.7
 -1 11 -1 22.2 16.3
 1 -11 1 24.2 14.3
 1 -11 1 40.8 10.9
 1 -11 1 59.39 18.4
 1 -11 1 35.8 10.7
 1 -11 1 49 17.9
 1 -11 1 36.1 10.5
 -2 11 -1 3.9 14
 -2 11 -1 -12.4 18
 -2 11 -1 0.8 19.4
 -2 11 -1 34 19.7
 2 -11 1 -17.1 10.8
 2 -11 1 20.8 13.3
 2 -11 1 29.6 14.3
 2 -11 1 -20.7 17.1
 2 -11 1 -9.5 19
 -3 11 -1 35 22.1
 -3 11 -1 40 24.3
 3 -11 1 17.7 21.6
 3 -11 1 21.6 18.6
 3 -11 1 11.1 12.1
 3 -11 1 21 15.7
 3 -11 1 29.1 16.7
 3 -11 1 5.8 16.3
 -4 11 -1 -31.2 23.4
 4 -11 1 40.3 18.4
 4 -11 1 -32 29.5
 4 -11 1 3.9 17.8
 4 -11 1 -30.5 21.7
 4 -11 1 8.2 19
 4 -11 1 0.4 14.3
 4 -11 1 -20.4 17
 4 -11 1 51.39 20.7
 5 -11 1 12.7 20.8
 5 -11 1 18.6 33.1
 5 -11 1 -5.8 21.5
 5 -11 1 -9 26
 5 -11 1 24.2 21.4
 5 -11 1 44 21.2
 5 -11 1 -29.9 22.8
 -6 11 -1 44.7 32.4
 6 -11 1 -24.5 37.3
 6 -11 1 23.5 23.9
 6 -11 1 0 29.5
 6 -11 1 24.4 25.3
 6 -11 1 4.9 22.1
 -7 11 -1 55.59 37.9
 7 -11 1 6.1 34.7
 7 -11 1 81.79 46.1
 7 -11 1 6.3 29.3
 7 -11 1 -67.39 60.09
 -8 11 -1 -33.4 53.59
 8 -11 1 8.1 41.6
 8 -11 1 2.4 51.09
 8 -11 1 26 35.7
 -9 11 -1 -80.89 67.19
 9 -11 1 -52.69 42.1
 9 -11 1 -32.9 59.59
 -10 11 -1 -54.39 75.29
 10 -11 1 141.69 75.79
 10 -11 1 119.69 54.99
 16 10 -1 -11.3 53.69
 16 10 -1 -43.4 60.09
 16 10 -1 -1.6 55.29
 16 10 -1 49.8 62.39
 -16 -10 1 -14.5 43
 -16 -10 1 -37.3 51.09
 -16 -10 1 -58.99 64.09
 15 10 -1 36 47.1
 15 10 -1 71.29 54.19
 15 10 -1 -59.19 48.1
 15 10 -1 -47.2 55.79
 -15 -10 1 155.48 61.19
 -15 -10 1 120.09 49.99
 -15 -10 1 94.19 39
 14 10 -1 27.3 45.1
 14 10 -1 71.29 46.5
 14 10 -1 -10.7 41.3
 14 10 -1 48.9 42.8
 -14 -10 1 41.7 37.2
 -14 -10 1 43.6 34
 -14 -10 1 126.89 53.29
 -14 -10 1 69.49 32.2
 -14 -10 1 139.19 45.3
 13 10 -1 29.4 34
 13 10 -1 -1.4 39.4
 13 10 -1 -77.49 37.4
 13 10 -1 -11.6 33.5
 -13 -10 1 -4.3 26.1
 -13 -10 1 18.8 44.1
 -13 -10 1 -13.6 34.2
 -13 -10 1 -59.69 26.2
 -13 -10 1 -24.7 31.5
 12 10 -1 13.4 30.8
 12 10 -1 66.29 30.7
 12 10 -1 -56.89 31
 12 10 -1 -19.6 44.1
 -12 -10 1 49 35.9
 -12 -10 1 38.4 24.7
 -12 -10 1 12.9 22.5
 -12 -10 1 -13.2 32.3
 11 10 -1 160.18 35.3
 11 10 -1 177.98 33.8
 11 10 -1 125.39 35.8
 11 10 -1 128.29 30.9
 -11 -10 1 106.29 29.3
 -11 -10 1 133.89 32.2
 -11 -10 1 125.99 25.4
 -11 -10 1 152.28 26.8
 -11 -10 1 166.58 35.2
 10 10 -1 34.9 27.6
 10 10 -1 35.7 23.2
 10 10 -1 63.89 21.7
 10 10 -1 70.59 31.2
 10 10 -1 88.09 25.4
 -10 -10 1 34.7 19.1
 -10 -10 1 59.59 25.7
 -10 -10 1 52.99 21.1
 -10 -10 1 73.29 25.8
 -10 -10 1 49.8 25.5
 9 10 -1 136.99 32
 9 10 -1 203.78 28.7
 9 10 -1 221.78 30.4
 9 10 -1 229.88 36.3
 -9 -10 1 180.78 26.6
 -9 -10 1 238.58 31.7
 -9 -10 1 223.88 31.2
 -9 -10 1 275.17 33
 -9 -10 1 203.28 27.1
 8 10 -1 208.08 28.2
 8 10 -1 226.28 32.6
 8 10 -1 220.78 28.6
 8 10 -1 189.68 28
 8 10 -1 228.98 35
 8 10 -1 214.88 25.9
 -8 -10 1 275.37 30.9
 -8 -10 1 211.38 26.7
 -8 -10 1 227.48 32.6
 -8 -10 1 202.18 29.2
 -8 -10 1 282.27 38.4
 -8 -10 1 191.68 34.4
 7 10 -1 81.79 18.4
 7 10 -1 78.59 21
 7 10 -1 113.39 28.7
 7 10 -1 87.09 18.5
 7 10 -1 128.49 25.3
 7 10 -1 124.99 20.9
 7 10 -1 71.99 14.6
 -7 -10 1 105.59 21.3
 -7 -10 1 89.49 19.7
 -7 -10 1 110.49 18.9
 -7 -10 1 137.79 21.9
 -7 -10 1 103.69 19.3
 -7 -10 1 94.89 25.3
 6 10 -1 116.89 21.1
 6 10 -1 96.59 17.1
 6 10 -1 109.09 13.1
 6 10 -1 90.89 20.1
 6 10 -1 110.79 27.5
 6 10 -1 105.29 16.4
 6 10 -1 89.89 18
 6 10 -1 95.99 23.2
 6 10 -1 128.49 19.5
 -6 -10 1 92.99 18.9
 -6 -10 1 129.99 18
 -6 -10 1 88.29 17.2
 -6 -10 1 106.19 18.4
 -6 -10 1 88.69 23
 -6 -10 1 80.59 19.1
 5 10 -1 189.68 26.4
 5 10 -1 191.58 21.9
 5 10 -1 153.58 21
 5 10 -1 139.69 17.6
 5 10 -1 153.28 14.7
 5 10 -1 111.09 29.3
 5 10 -1 176.78 22.4
 5 10 -1 181.08 24.3
 -5 -10 1 169.58 20.8
 -5 -10 1 182.68 24
 -5 -10 1 179.38 24.8
 -5 -10 1 154.68 21.9
 -5 -10 1 117.79 23
 -5 -10 1 179.98 23.9
 -5 -10 1 137.89 20.6
 -5 -10 1 163.88 20.7
 4 10 -1 226.38 22.4
 4 10 -1 233.48 24.6
 4 10 -1 245.28 27
 4 10 -1 189.88 23.3
 4 10 -1 204.48 24.2
 4 10 -1 204.38 24.9
 4 10 -1 197.58 29
 -4 -10 1 227.28 28.6
 -4 -10 1 230.28 21.9
 -4 -10 1 257.87 27.3
 -4 -10 1 217.58 25.7
 -4 -10 1 279.07 32.1
 -4 -10 1 265.97 27
 -4 -10 1 253.07 23.4
 -4 -10 1 281.47 26.8
 -4 -10 1 218.58 28.1
 3 10 -1 643.94 47.9
 3 10 -1 647.44 46
 3 10 -1 602.84 44.9
 3 10 -1 638.04 46.1
 3 10 -1 625.94 50.69
 3 10 -1 698.73 50.39
 3 10 -1 617.44 49.4
 3 10 -1 724.53 52.09
 -3 -10 1 704.93 46.6
 -3 -10 1 755.02 48.9
 -3 -10 1 623.34 54.89
 -3 -10 1 647.94 49.8
 -3 -10 1 600.44 54.29
 -3 -10 1 650.93 49.8
 -3 -10 1 634.74 48
 -3 -10 1 699.03 50.09
 -3 -10 1 659.53 45.2
 2 10 -1 9.8 14.4
 2 10 -1 3.6 14.7
 2 10 -1 -12.2 15.4
 2 10 -1 10.8 12.2
 2 10 -1 10.8 12.2
 2 10 -1 -13.7 7.8
 -2 -10 1 -1.1 31.7
 -2 -10 1 13.5 10.6
 -2 -10 1 -0.4 19.6
 -2 -10 1 13.1 13.8
 -2 -10 1 4.9 9.4
 -2 -10 1 -21.5 12.8
 -2 -10 1 -0.2 11.2
 -2 -10 1 21.2 12
 1 10 -1 15.2 12.1
 1 10 -1 33.8 15.3
 1 10 -1 17.2 14.7
 1 10 -1 5.7 14
 1 10 -1 10.3 13.8
 -1 -10 1 4.2 13.5
 -1 -10 1 -9.7 11.5
 -1 -10 1 21.3 22.6
 -1 -10 1 -12.7 19.8
 -1 -10 1 15.8 11.4
 -1 -10 1 34.4 10.4
 -1 -10 1 -1.3 13.2
 -1 -10 1 16.8 9.4
 -1 -10 1 26 11.7
 0 10 -1 185.48 23.6
 0 10 -1 206.58 27
 0 10 -1 221.28 27.2
 0 -10 1 248.68 25.3
 0 -10 1 278.57 28.1
 0 -10 1 184.38 20.7
 0 -10 1 168.58 21.4
 0 -10 1 168.58 23.8
 0 -10 1 184.98 25.5
 0 -10 1 212.28 25
 0 -10 1 211.08 30.7
 -1 10 -1 216.18 25.8
 -1 10 -1 203.78 27.6
 -1 10 -1 174.38 21.5
 1 -10 1 193.38 43.7
 1 -10 1 163.68 17.8
 1 -10 1 158.78 20.7
 1 -10 1 205.48 22.2
 1 -10 1 183.98 26
 1 -10 1 189.58 20.7
 1 -10 1 172.78 16.8
 1 -10 1 157.28 17.7
 1 -10 1 170.28 17.3
 -2 10 -1 260.37 29.9
 -2 10 -1 172.68 27.1
 -2 10 -1 222.38 23.2
 -2 10 -1 269.77 32.7
 2 -10 1 236.08 23.4
 2 -10 1 271.17 25.1
 2 -10 1 222.98 22.7
 2 -10 1 217.78 19.7
 2 -10 1 252.57 24.1
 2 -10 1 247.58 28
 2 -10 1 223.48 29.7
 -3 10 -1 245.78 29.2
 -3 10 -1 241.18 32.4
 3 -10 1 326.67 34
 3 -10 1 239.48 25.9
 3 -10 1 240.78 26.7
 3 -10 1 224.18 21.6
 3 -10 1 217.78 28.1
 -4 10 -1 45.6 24.4
 4 -10 1 -7.2 11.5
 4 -10 1 -19.7 19.8
 4 -10 1 -0.1 27.2
 4 -10 1 -1.7 14.7
 4 -10 1 -13.8 16.2
 4 -10 1 2.4 16
 4 -10 1 6.2 16.2
 -5 10 -1 45.3 25.3
 5 -10 1 5.6 14.5
 5 -10 1 15.6 21.3
 5 -10 1 30.2 18.2
 5 -10 1 10 17.6
 5 -10 1 59.19 35
 5 -10 1 31.7 18
 5 -10 1 24.2 22.5
 -6 10 -1 269.37 58.89
 6 -10 1 304.67 37.6
 6 -10 1 298.57 33.4
 6 -10 1 232.78 28
 6 -10 1 221.38 31.6
 6 -10 1 247.78 31.9
 6 -10 1 221.28 33.9
 6 -10 1 255.77 34.7
 6 -10 1 207.18 42.5
 -7 10 -1 102.49 35.8
 7 -10 1 33.1 23.1
 7 -10 1 39.9 37.9
 7 -10 1 31 27.6
 7 -10 1 62.89 31.5
 -8 10 -1 52.79 48.3
 8 -10 1 8.8 44.8
 8 -10 1 -21.5 30.9
 8 -10 1 29.7 34.4
 -9 10 -1 13.2 52.49
 9 -10 1 -4.3 69.39
 9 -10 1 1.7 50.69
 -10 10 -1 122.79 65.79
 10 -10 1 -93.39 45.3
 10 -10 1 -9.1 60.49
 16 9 -1 168.98 60.89
 16 9 -1 2.9 51.69
 16 9 -1 5.2 56.19
 16 9 -1 -117.49 50.59
 -16 -9 1 -57.99 40
 -16 -9 1 92.49 50.29
 -16 -9 1 -52.49 60.99
 15 9 -1 -70.29 48.3
 15 9 -1 -32.4 44.8
 15 9 -1 26.8 45.7
 15 9 -1 -31.2 44.8
 -15 -9 1 -75.99 40.7
 -15 -9 1 81.09 36.6
 -15 -9 1 -42.1 55.49
 14 9 -1 46.6 38.9
 14 9 -1 8.4 37.2
 14 9 -1 -17 37.3
 14 9 -1 38.8 42.9
 -14 -9 1 8 26.8
 -14 -9 1 -23.9 36.5
 -14 -9 1 9.5 45.3
 -14 -9 1 -52.59 29.8
 13 9 -1 24.6 38
 13 9 -1 90.49 35
 13 9 -1 89.19 37
 13 9 -1 -17.8 32.5
 -13 -9 1 21.9 32.4
 -13 -9 1 88.19 38.9
 -13 -9 1 14.6 26.7
 -13 -9 1 25.6 32.9
 12 9 -1 11.5 17.6
 12 9 -1 70.99 29.9
 12 9 -1 -16.2 43.4
 12 9 -1 29.4 32.7
 -12 -9 1 32.7 21.9
 -12 -9 1 4.4 29.1
 -12 -9 1 -20.3 26.1
 -12 -9 1 -23 29.4
 11 9 -1 22.9 32.2
 11 9 -1 37.3 27.9
 11 9 -1 37.3 25.2
 11 9 -1 15.7 23.8
 -11 -9 1 74.69 25.9
 -11 -9 1 2.1 25.9
 -11 -9 1 11.4 26.3
 -11 -9 1 31.5 27.3
 -11 -9 1 55.09 21
 10 9 -1 -14.8 20
 10 9 -1 -28.5 23.6
 10 9 -1 -26.3 20.1
 10 9 -1 -39.6 22.8
 10 9 -1 16.1 20.3
 -10 -9 1 12.8 17.4
 -10 -9 1 25.6 17.3
 -10 -9 1 24.1 21.2
 -10 -9 1 14.2 21.1
 -10 -9 1 -23.1 20.6
 9 9 -1 11.6 18.8
 9 9 -1 -15.8 20.8
 9 9 -1 1.6 17.8
 9 9 -1 -40.9 16
 9 9 -1 -29.4 20.5
 -9 -9 1 38.4 16.2
 -9 -9 1 -18.8 15.7
 -9 -9 1 -7.7 18
 -9 -9 1 15.9 16.1
 -9 -9 1 -6.9 17.2
 8 9 -1 49.9 21.7
 8 9 -1 58.19 17.9
 8 9 -1 92.89 18.9
 8 9 -1 39.2 18.6
 8 9 -1 65.99 21.1
 8 9 -1 62.29 14.9
 -8 -9 1 57.49 16.1
 -8 -9 1 69.89 20.9
 -8 -9 1 63.49 16.6
 -8 -9 1 71.49 18.9
 -8 -9 1 63.99 17.8
 -8 -9 1 59.39 24.2
 7 9 -1 42.2 19.4
 7 9 -1 0.6 10.5
 7 9 -1 -8.6 14.1
 7 9 -1 5.3 16.9
 7 9 -1 -19.7 13.7
 7 9 -1 -24.1 13.7
 7 9 -1 4.8 18.2
 7 9 -1 28.2 16.8
 -7 -9 1 -5.6 13.5
 -7 -9 1 -6 12.7
 -7 -9 1 10.9 18.4
 -7 -9 1 39.4 15.7
 -7 -9 1 25.8 15.3
 -7 -9 1 19.6 11.9
 6 9 -1 49.5 14.3
 6 9 -1 53.59 19
 6 9 -1 31.1 14.9
 6 9 -1 41.5 14.8
 6 9 -1 14.2 23.2
 6 9 -1 47.3 10.4
 6 9 -1 49.1 15.4
 6 9 -1 40.9 18.7
 6 9 -1 29.6 13.2
 -6 -9 1 52.39 13.2
 -6 -9 1 12.3 15.3
 -6 -9 1 39.1 13.1
 -6 -9 1 36.2 17.1
 -6 -9 1 1.3 17
 -6 -9 1 25.5 14.7
 -6 -9 1 13.5 14.1
 -6 -9 1 54.99 15.7
 5 9 -1 40.6 11.9
 5 9 -1 46.9 14
 5 9 -1 70.89 19.6
 5 9 -1 69.99 17.8
 5 9 -1 55.79 13.2
 5 9 -1 24.7 16.9
 5 9 -1 46.6 15.2
 5 9 -1 52.69 9.6
 5 9 -1 53.29 13.7
 5 9 -1 51.09 9.5
 -5 -9 1 39.8 13.7
 -5 -9 1 50.19 17.2
 -5 -9 1 44.5 16.8
 -5 -9 1 44.3 12.2
 -5 -9 1 33.4 13.7
 -5 -9 1 90.29 15.5
 -5 -9 1 46.4 15.3
 -5 -9 1 48.5 13.7
 4 9 -1 -0.9 12.3
 4 9 -1 6.6 11.3
 4 9 -1 11.5 8.6
 4 9 -1 -13 9.9
 4 9 -1 -2.7 11.7
 4 9 -1 -1.4 10
 4 9 -1 15.4 15.4
 4 9 -1 17.8 8.2
 -4 -9 1 -6.8 14.9
 -4 -9 1 -4 10.1
 -4 -9 1 2.7 12.2
 -4 -9 1 7.6 7.2
 -4 -9 1 5.1 10.9
 -4 -9 1 18.3 12.3
 -4 -9 1 -13 11
 -4 -9 1 6 13.7
 3 9 -1 11.1 11.1
 3 9 -1 12 11
 3 9 -1 -5.4 9
 3 9 -1 3.9 8.6
 3 9 -1 -25.8 12.9
 3 9 -1 0.1 8.5
 3 9 -1 8 7.6
 3 9 -1 -5.6 12
 -3 -9 1 4.3 10.6
 -3 -9 1 7.9 10.5
 -3 -9 1 9.2 11.7
 -3 -9 1 10.3 13.7
 -3 -9 1 20.5 14.6
 -3 -9 1 13.9 17.1
 -3 -9 1 3 6.5
 -3 -9 1 -4.2 9.5
 -3 -9 1 12.4 10.1
 2 9 -1 761.52 55.19
 2 9 -1 807.62 55.49
 2 9 -1 781.72 54.29
 2 9 -1 785.32 51.29
 2 9 -1 863.71 54.69
 2 9 -1 755.62 51.49
 2 9 -1 695.13 54.79
 -2 -9 1 774.82 54.49
 -2 -9 1 690.23 57.99
 -2 -9 1 780.62 53.19
 -2 -9 1 802.12 53.79
 -2 -9 1 756.72 57.59
 -2 -9 1 739.93 55.09
 -2 -9 1 810.42 55.09
 1 9 -1 85.99 17.2
 1 9 -1 112.49 16.4
 1 9 -1 74.69 13.9
 1 9 -1 66.59 15.9
 1 9 -1 108.59 16
 -1 -9 1 106.59 16.3
 -1 -9 1 91.69 15.4
 -1 -9 1 99.59 13.7
 -1 -9 1 87.49 18.4
 -1 -9 1 85.69 13.4
 -1 -9 1 106.79 14.8
 -1 -9 1 129.99 19.2
 0 9 -1 13.9 10.7
 0 9 -1 -6.5 11.5
 0 9 -1 13.9 10.7
 0 9 -1 -6.3 10.7
 0 9 -1 -9.3 11.5
 0 -9 1 1.9 10.4
 0 -9 1 -6.5 5.4
 0 -9 1 4.2 6.3
 0 -9 1 6.3 11.2
 0 -9 1 6.3 9.4
 0 -9 1 27 14.7
 0 -9 1 5.2 8.7
 0 -9 1 -17.9 8.1
 0 -9 1 3.4 5.3
 0 -9 1 6.9 11
 -1 9 -1 18.2 13.9
 -1 9 -1 17.9 10
 -1 9 -1 14.8 13.1
 1 -9 1 40 10.6
 1 -9 1 6.6 16
 1 -9 1 1.8 6.1
 1 -9 1 6.5 7.9
 1 -9 1 -18.8 10.7
 1 -9 1 1.5 9.4
 1 -9 1 7.8 10.4
 1 -9 1 28.1 13.2
 1 -9 1 10.9 7.3
 -2 9 -1 108.19 13.5
 -2 9 -1 92.19 16.3
 -2 9 -1 106.39 18.8
 -2 9 -1 117.99 21.5
 2 -9 1 119.09 18.1
 2 -9 1 121.29 16.6
 2 -9 1 107.09 16.2
 2 -9 1 118.59 14
 2 -9 1 73.59 19.8
 2 -9 1 91.99 11.9
 2 -9 1 130.09 15.2
 -3 9 -1 -2.3 16.2
 -3 9 -1 -6.7 15.5
 3 -9 1 -10.2 11.3
 3 -9 1 43.3 18.6
 3 -9 1 2.3 10.4
 3 -9 1 -11.1 7
 3 -9 1 8.2 13.6
 3 -9 1 -19.1 12.4
 3 -9 1 -5.4 14.3
 -4 9 -1 -34.4 17.1
 4 -9 1 9.8 16.4
 4 -9 1 6.7 23.7
 4 -9 1 17.5 9.9
 4 -9 1 -9.4 19.8
 4 -9 1 -10 14.5
 4 -9 1 10.9 12.1
 4 -9 1 19.2 14
 -5 9 -1 -8 19.8
 5 -9 1 28.2 21.7
 5 -9 1 1.2 18.5
 5 -9 1 26.1 25.5
 5 -9 1 28.1 19.3
 5 -9 1 6.2 14.7
 5 -9 1 20 12.8
 -6 9 -1 -8.4 25.3
 -6 9 -1 8.7 13.9
 6 -9 1 22.9 17.1
 6 -9 1 8.9 16.4
 6 -9 1 -40.3 36
 6 -9 1 16 24.5
 6 -9 1 -1.1 21.4
 6 -9 1 -5.5 16.3
 6 -9 1 4.7 17
 6 -9 1 46 23.3
 -7 9 -1 82.39 32.2
 -7 9 -1 18.7 18.9
 7 -9 1 68.99 26.9
 7 -9 1 54.89 19.9
 7 -9 1 31.8 33.6
 7 -9 1 -5.8 18.5
 7 -9 1 93.79 22.3
 7 -9 1 16.6 21.9
 7 -9 1 64.19 27.5
 7 -9 1 55.29 26
 -8 9 -1 33.8 22.9
 -8 9 -1 72.99 40.8
 8 -9 1 56.39 41.4
 8 -9 1 22.8 24.4
 8 -9 1 56.29 31.9
 8 -9 1 59.69 30.6
 -9 9 -1 64.19 27.8
 -9 9 -1 6.3 47.8
 9 -9 1 0.7 45.5
 9 -9 1 -23.4 34.3
 9 -9 1 9 33.6
 -10 9 -1 -6.4 55.89
 10 -9 1 40.3 56.19
 10 -9 1 -22.5 55.49
 -11 9 -1 58.99 63.99
 11 -9 1 51.59 64.89
 17 8 -1 -2.9 60.29
 17 8 -1 123.29 65.49
 -17 -8 1 -68.39 46.6
 -17 -8 1 69.19 73.59
 16 8 -1 -56.19 50.69
 16 8 -1 66.49 57.09
 16 8 -1 43.4 51.09
 16 8 -1 -25.1 61.89
 -16 -8 1 -110.39 48.2
 -16 -8 1 17.2 57.09
 -16 -8 1 44.4 38.7
 15 8 -1 -1.2 49.5
 15 8 -1 13.1 43.2
 15 8 -1 90.29 44.2
 15 8 -1 -24.8 46.7
 -15 -8 1 40 51.09
 -15 -8 1 64.59 34.1
 -15 -8 1 -7.5 39.8
 14 8 -1 -46.2 41.7
 14 8 -1 -4.1 35.9
 14 8 -1 51.99 39.7
 14 8 -1 15.1 37.6
 -14 -8 1 20 36.7
 -14 -8 1 12.6 25
 -14 -8 1 -14.5 28.9
 -14 -8 1 16.7 40.5
 13 8 -1 -48.1 29.1
 13 8 -1 22.2 35.1
 13 8 -1 -10.6 31.3
 -13 -8 1 8.3 30.7
 -13 -8 1 17.1 30.8
 -13 -8 1 1.3 21.7
 -13 -8 1 36.7 31.4
 -13 -8 1 9.5 51.59
 12 8 -1 -16.4 24.7
 12 8 -1 -35.8 29.1
 12 8 -1 1.4 27.5
 12 8 -1 14.9 16.8
 12 8 -1 21.4 31.7
 -12 -8 1 -16.6 28.1
 -12 -8 1 28.5 27
 -12 -8 1 -5.7 19
 -12 -8 1 -37.8 27.4
 -12 -8 1 -26.1 20.6
 11 8 -1 15.4 14.5
 11 8 -1 47.3 26.7
 11 8 -1 45.2 24.7
 11 8 -1 36.9 23
 11 8 -1 -0.7 22.5
 -11 -8 1 23.7 16.7
 -11 -8 1 7.3 18.7
 -11 -8 1 26.2 25
 -11 -8 1 -13.8 22.6
 -11 -8 1 8.5 25.7
 10 8 -1 40 20.3
 10 8 -1 17.7 19.8
 10 8 -1 12.4 25.3
 10 8 -1 44.7 21
 10 8 -1 58.99 24.4
 -10 -8 1 36.1 23.2
 -10 -8 1 55.99 17.3
 -10 -8 1 30.8 21.3
 -10 -8 1 64.89 16.7
 -10 -8 1 63.09 22.5
 9 8 -1 21.4 19.9
 9 8 -1 21.4 16.7
 9 8 -1 10.9 9.4
 9 8 -1 19.9 15.9
 9 8 -1 26.2 21.4
 9 8 -1 20.2 17.4
 -9 -8 1 12.8 13.7
 -9 -8 1 13.4 14.3
 -9 -8 1 8.4 17.2
 -9 -8 1 7.4 17.5
 -9 -8 1 11.2 17.8
 8 8 -1 266.17 30.6
 8 8 -1 215.58 27.8
 8 8 -1 272.47 30.8
 8 8 -1 276.47 36.2
 8 8 -1 285.07 33.1
 8 8 -1 198.88 31.5
 -8 -8 1 301.67 28.2
 -8 -8 1 310.27 32.8
 -8 -8 1 325.17 32.3
 -8 -8 1 322.47 31.9
 -8 -8 1 267.47 28.4
 -8 -8 1 282.97 38.8
 7 8 -1 17.9 13.5
 7 8 -1 9 20.2
 7 8 -1 23.2 14
 7 8 -1 51.79 17.2
 7 8 -1 16.3 18.6
 7 8 -1 30.5 12.2
 7 8 -1 28.6 14.5
 7 8 -1 51.79 16.5
 7 8 -1 36.8 15.3
 -7 -8 1 28.4 14.1
 -7 -8 1 30.5 18.6
 -7 -8 1 51.79 13.7
 -7 -8 1 41.3 18.2
 -7 -8 1 27.5 16.7
 -7 -8 1 43 15.7
 -7 -8 1 31.1 13.5
 -7 -8 1 44 17.5
 6 8 -1 86.89 17.7
 6 8 -1 59.29 20.3
 6 8 -1 89.89 16
 6 8 -1 58.79 15.4
 6 8 -1 84.89 15.5
 6 8 -1 80.19 20.3
 6 8 -1 81.09 15
 6 8 -1 86.49 12.1
 6 8 -1 75.69 15.6
 -6 -8 1 102.19 17.4
 -6 -8 1 83.49 15
 -6 -8 1 70.29 15.9
 -6 -8 1 60.29 17.2
 -6 -8 1 94.49 15.9
 -6 -8 1 99.29 17.7
 -6 -8 1 92.79 18.8
 -6 -8 1 76.99 16.1
 5 8 -1 -2.8 10.5
 5 8 -1 2.2 9.8
 5 8 -1 -2.4 12.9
 5 8 -1 -5.7 11
 5 8 -1 3 9.1
 5 8 -1 32.9 15.5
 5 8 -1 11 15
 5 8 -1 9.3 6.9
 5 8 -1 -2.5 11.2
 -5 -8 1 -6.6 9.8
 -5 -8 1 14.7 10.8
 -5 -8 1 -4.7 10.6
 -5 -8 1 -14.9 11.8
 -5 -8 1 -21.6 12.7
 -5 -8 1 10.4 12.6
 -5 -8 1 -2.1 10.4
 4 8 -1 -7.9 9.1
 4 8 -1 5.6 5.4
 4 8 -1 11.5 11
 4 8 -1 7.3 13.5
 4 8 -1 -10.9 10.7
 4 8 -1 3.7 9.1
 4 8 -1 6.2 9.2
 4 8 -1 -9.6 7.9
 4 8 -1 -7.1 6.4
 -4 -8 1 -0.3 9.6
 -4 -8 1 -11.1 11.2
 -4 -8 1 12.3 10
 -4 -8 1 7.6 9.9
 -4 -8 1 -8.5 10.4
 -4 -8 1 2.6 9.5
 -4 -8 1 7.4 12.9
 -4 -8 1 9.5 7.3
 3 8 -1 -21.5 7.7
 3 8 -1 -0.7 9.4
 3 8 -1 -0.7 6.9
 3 8 -1 -0.8 7.4
 3 8 -1 -0.6 7.2
 3 8 -1 -8.9 10.4
 3 8 -1 -16.4 11.2
 3 8 -1 -1.9 8.8
 -3 -8 1 -11.7 9
 -3 -8 1 -7.8 12.3
 -3 -8 1 -5.3 9.2
 -3 -8 1 7.6 8.7
 -3 -8 1 -17.2 10.3
 -3 -8 1 5.9 5.7
 -3 -8 1 -3.9 8.4
 -3 -8 1 -19.4 9.4
 2 8 -1 187.28 17.6
 2 8 -1 175.88 21.4
 2 8 -1 204.98 21.3
 2 8 -1 197.58 17.3
 2 8 -1 210.58 18.7
 2 8 -1 168.68 17.7
 2 8 -1 196.58 20.6
 2 8 -1 175.28 20.8
 -2 -8 1 234.68 21.1
 -2 -8 1 185.18 24.4
 -2 -8 1 198.08 20.1
 -2 -8 1 201.88 21.2
 -2 -8 1 209.98 18.8
 -2 -8 1 201.98 24.8
 1 8 -1 60.79 11.8
 1 8 -1 60.29 12.1
 1 8 -1 59.79 11.9
 1 8 -1 55.49 12.5
 1 8 -1 76.09 14.1
 -1 -8 1 56.79 12.5
 -1 -8 1 67.59 12.6
 -1 -8 1 62.29 11.1
 -1 -8 1 60.49 14.4
 -1 -8 1 71.49 12.3
 -1 -8 1 101.19 12.7
 -1 -8 1 71.19 11.3
 0 8 -1 133.89 16.7
 0 8 -1 128.49 17
 0 8 -1 156.28 19.7
 0 8 -1 162.08 18.2
 0 -8 1 136.09 14.7
 0 -8 1 122.99 16.2
 0 -8 1 134.69 18.3
 0 -8 1 129.59 18.6
 0 -8 1 136.49 12.2
 0 -8 1 153.08 16.6
 0 -8 1 126.79 17.8
 0 -8 1 127.09 16
 -1 8 -1 94.19 12.5
 -1 8 -1 101.99 15.4
 -1 8 -1 113.19 17.8
 1 -8 1 88.89 10.7
 1 -8 1 88.59 9.9
 1 -8 1 101.79 13.5
 1 -8 1 87.09 18
 1 -8 1 116.79 14.8
 1 -8 1 101.59 12.3
 1 -8 1 96.79 11.9
 1 -8 1 110.39 17.1
 -2 8 -1 18.5 11.4
 -2 8 -1 52.39 12.9
 -2 8 -1 36 8.7
 -2 8 -1 52.79 15.1
 2 -8 1 43 12.5
 2 -8 1 46.7 15.8
 2 -8 1 45 9.1
 2 -8 1 45.1 9.7
 2 -8 1 41.7 6.5
 2 -8 1 45.7 12.3
 2 -8 1 53.39 11.7
 -3 8 -1 83.49 18.3
 -3 8 -1 59.29 12.6
 -3 8 -1 54.59 15.4
 3 -8 1 108.49 15.4
 3 -8 1 73.39 14.8
 3 -8 1 77.49 9.6
 3 -8 1 76.09 13.3
 3 -8 1 43.3 16.1
 -4 8 -1 249.78 30.5
 4 -8 1 265.17 33.1
 4 -8 1 247.38 27.3
 4 -8 1 184.08 24.8
 4 -8 1 220.78 19.6
 4 -8 1 188.68 22.2
 4 -8 1 169.88 33.3
 4 -8 1 188.98 18
 -5 8 -1 42.5 20.5
 -5 8 -1 7.4 10.5
 5 -8 1 -29.7 15.3
 5 -8 1 -3.4 12.2
 5 -8 1 5.4 22.8
 5 -8 1 45.8 19.4
 5 -8 1 13.5 16.4
 5 -8 1 1.7 10.8
 5 -8 1 20 11.2
 5 -8 1 8 16.1
 -6 8 -1 22 22.9
 6 -8 1 -3.4 22.7
 6 -8 1 14.8 19.3
 6 -8 1 13.5 20.2
 6 -8 1 -1 13.9
 6 -8 1 4.7 14.4
 6 -8 1 29.4 14.7
 6 -8 1 -13.4 19.9
 6 -8 1 7.9 13.7
 6 -8 1 0.7 18.2
 -7 8 -1 163.38 31.1
 -7 8 -1 126.99 22
 7 -8 1 178.68 27.2
 7 -8 1 141.59 26.2
 7 -8 1 150.78 21
 7 -8 1 129.19 33.4
 7 -8 1 141.29 20.7
 7 -8 1 145.79 27.8
 7 -8 1 102.99 21.1
 7 -8 1 167.38 27
 -8 8 -1 3.4 32.5
 -8 8 -1 39.8 20.8
 8 -8 1 79.89 38.5
 8 -8 1 58.89 24.4
 8 -8 1 93.19 23.2
 8 -8 1 35.2 25.3
 8 -8 1 34.6 21.3
 8 -8 1 -4.8 28.5
 8 -8 1 54.29 27.8
 8 -8 1 -12.3 21.2
 -9 8 -1 49.7 24.6
 -9 8 -1 89.49 42.8
 9 -8 1 40.4 23.1
 9 -8 1 31.4 23.9
 -10 8 -1 25.6 28.4
 -10 8 -1 7.7 47.4
 10 -8 1 -14.2 47.3
 10 -8 1 21.2 26
 -11 8 -1 19.1 54.49
 11 -8 1 72.09 58.49
 -12 8 -1 96.79 72.19
 12 -8 1 72.79 68.09
 17 7 -1 20 65.49
 17 7 -1 42.7 58.09
 17 7 -1 -62.19 59.89
 17 7 -1 -44.7 59.89
 -17 -7 1 8.9 56.59
 -17 -7 1 -43.2 60.49
 -17 -7 1 -15.8 45.9
 16 7 -1 -57.49 53.79
 16 7 -1 65.09 51.99
 16 7 -1 -32.5 49
 16 7 -1 -23.3 55.09
 -16 -7 1 110.29 40.7
 -16 -7 1 -73.49 48.4
 -16 -7 1 13.6 54.39
 15 7 -1 14 45.4
 15 7 -1 25.4 43.7
 15 7 -1 21.4 42.6
 15 7 -1 17.6 41
 -15 -7 1 36.1 45.6
 -15 -7 1 25.7 42
 -15 -7 1 31.7 32.9
 14 7 -1 -22.2 35.9
 14 7 -1 -8.5 35
 14 7 -1 32.8 39.3
 14 7 -1 73.79 37.9
 -14 -7 1 74.39 36.8
 -14 -7 1 44 37.3
 -14 -7 1 19.2 28.5
 13 7 -1 64.99 30.3
 13 7 -1 -23.6 30.1
 13 7 -1 22.3 30.9
 13 7 -1 25.6 32.5
 -13 -7 1 -11.1 28.9
 -13 -7 1 15.5 20
 -13 -7 1 36.3 24.9
 -13 -7 1 1.2 31.1
 -13 -7 1 60.09 31.9
 12 7 -1 -9.9 30.2
 12 7 -1 2.4 26.7
 12 7 -1 17.5 19.2
 12 7 -1 -7.7 25.4
 12 7 -1 2.4 27.1
 -12 -7 1 0.5 26.4
 -12 -7 1 6.9 20.6
 -12 -7 1 25.6 26.7
 -12 -7 1 -4.2 17.4
 -12 -7 1 53.29 29.4
 11 7 -1 -2.7 24.4
 11 7 -1 7.6 14.6
 11 7 -1 21.5 22.2
 11 7 -1 23.1 22
 11 7 -1 0.5 21
 -11 -7 1 12.6 15.1
 -11 -7 1 20.6 24.4
 -11 -7 1 19.7 17.6
 -11 -7 1 10.1 23.3
 -11 -7 1 4.7 23.6
 10 7 -1 -23 17.4
 10 7 -1 15.3 12.6
 10 7 -1 -33.7 16.8
 10 7 -1 46.2 24.1
 10 7 -1 21.7 21.9
 -10 -7 1 23.8 19.7
 -10 -7 1 -1.2 13.3
 -10 -7 1 10.9 14.8
 -10 -7 1 0.9 18.5
 -10 -7 1 0.2 18.6
 9 7 -1 4.8 16
 9 7 -1 12.3 15.9
 9 7 -1 15.3 18.5
 9 7 -1 19.2 13.2
 9 7 -1 13.2 16.5
 9 7 -1 4.9 18.5
 -9 -7 1 20.3 19
 -9 -7 1 32.9 13.7
 -9 -7 1 21.7 16.2
 -9 -7 1 35.5 18.2
 -9 -7 1 26.9 13.4
 8 7 -1 16.5 13
 8 7 -1 13 16.9
 8 7 -1 18.5 8.1
 8 7 -1 23.7 14.8
 8 7 -1 -20.2 19.8
 8 7 -1 22.4 14.8
 8 7 -1 37.2 17
 8 7 -1 47.9 17.9
 8 7 -1 22.9 15
 8 7 -1 30.1 15.3
 -8 -7 1 20.1 12.5
 -8 -7 1 8.8 17.2
 -8 -7 1 21.4 27.6
 -8 -7 1 33.6 15.6
 -8 -7 1 56.19 18
 -8 -7 1 34.4 12.5
 -8 -7 1 29.8 17.4
 -8 -7 1 11.7 20.5
 -8 -7 1 30 14.1
 7 7 -1 108.79 15.2
 7 7 -1 87.99 23.3
 7 7 -1 100.99 18.1
 7 7 -1 110.59 17.7
 7 7 -1 95.09 19
 7 7 -1 100.29 17.1
 7 7 -1 156.58 23.6
 7 7 -1 94.79 11.2
 7 7 -1 100.99 17.6
 7 7 -1 107.59 18.1
 -7 -7 1 92.49 16.7
 -7 -7 1 160.48 19.9
 -7 -7 1 88.79 19.4
 -7 -7 1 119.89 16.2
 -7 -7 1 140.79 21.8
 -7 -7 1 109.29 18.9
 -7 -7 1 109.09 19.2
 -7 -7 1 133.59 19.9
 6 7 -1 12.2 11.3
 6 7 -1 0.9 10.5
 6 7 -1 -2.9 10.7
 6 7 -1 -3.9 15.2
 6 7 -1 -0.7 8.5
 6 7 -1 10.7 11.3
 6 7 -1 -9.1 11.8
 6 7 -1 -15.7 11.7
 6 7 -1 -22.1 9.1
 -6 -7 1 -8.1 12.9
 -6 -7 1 -4.2 9.1
 -6 -7 1 1.3 13.8
 -6 -7 1 10.2 11.1
 -6 -7 1 -0.4 11.3
 -6 -7 1 -9.1 9.4
 -6 -7 1 -4.1 11.1
 -6 -7 1 5.9 11.7
 5 7 -1 181.78 19
 5 7 -1 188.88 23.9
 5 7 -1 152.38 19.3
 5 7 -1 170.18 20.1
 5 7 -1 182.48 19
 5 7 -1 182.38 21.6
 5 7 -1 173.38 22.2
 5 7 -1 162.98 18.7
 -5 -7 1 180.28 18.3
 -5 -7 1 174.38 21.1
 -5 -7 1 180.58 19.6
 -5 -7 1 179.08 20
 -5 -7 1 179.08 20.8
 -5 -7 1 155.38 18.8
 -5 -7 1 145.49 19.7
 -5 -7 1 146.39 18.7
 4 7 -1 94.09 13
 4 7 -1 101.29 12.9
 4 7 -1 100.69 12.8
 4 7 -1 84.89 14.3
 4 7 -1 93.19 16.6
 4 7 -1 111.39 15.7
 4 7 -1 104.49 17.8
 4 7 -1 97.99 14
 4 7 -1 122.09 14.1
 -4 -7 1 99.99 14.5
 -4 -7 1 95.09 15.3
 -4 -7 1 109.99 13.3
 -4 -7 1 94.59 14.2
 -4 -7 1 118.09 15.8
 -4 -7 1 113.79 15.6
 -4 -7 1 111.79 14.5
 -4 -7 1 102.69 15.6
 -4 -7 1 93.79 13.4
 3 7 -1 1886.31 117.89
 3 7 -1 1762.92 117.79
 3 7 -1 1859.21 115.89
 3 7 -1 1819.12 119.49
 3 7 -1 1939.11 119.39
 3 7 -1 1762.12 118.49
 3 7 -1 1837.82 119.09
 3 7 -1 1898.81 118.89
 3 7 -1 1819.62 117.29
 -3 -7 1 1842.92 117.29
 -3 -7 1 1809.92 118.19
 -3 -7 1 1859.21 117.89
 -3 -7 1 1747.53 118.59
 -3 -7 1 1844.82 120.29
 -3 -7 1 1834.72 118.99
 -3 -7 1 1782.82 118.89
 -3 -7 1 1818.02 119.29
 2 7 -1 2.2 8.3
 2 7 -1 12.8 6.4
 2 7 -1 8.3 8
 2 7 -1 -8.5 9
 2 7 -1 13.5 7.1
 2 7 -1 7.9 7.3
 2 7 -1 9.1 8.3
 -2 -7 1 25.6 10.6
 -2 -7 1 7.8 6.1
 -2 -7 1 1.9 7.8
 -2 -7 1 16.6 8.5
 -2 -7 1 7.9 6.5
 -2 -7 1 21.7 11.3
 -2 -7 1 15.8 7
 -2 -7 1 6.5 7.7
 -2 -7 1 5.2 4.5
 1 7 -1 82.49 9.1
 1 7 -1 97.89 12.4
 1 7 -1 80.39 12.4
 1 7 -1 87.29 12.4
 1 7 -1 91.89 12.5
 1 7 -1 94.49 12.9
 1 7 -1 84.19 8.4
 -1 -7 1 83.49 11.9
 -1 -7 1 88.29 12.5
 -1 -7 1 101.29 15.1
 -1 -7 1 102.39 13.6
 -1 -7 1 84.09 11.8
 -1 -7 1 88.59 11.7
 -1 -7 1 70.29 9.9
 -1 -7 1 98.39 12.8
 0 7 -1 48.5 11.4
 0 7 -1 76.69 12.8
 0 7 -1 76.59 10.3
 0 -7 1 66.89 10.4
 0 -7 1 60.59 12.3
 0 -7 1 73.59 10.1
 0 -7 1 68.69 9.1
 0 -7 1 57.19 8
 0 -7 1 47.6 11.9
 0 -7 1 66.49 9.4
 0 -7 1 66.09 11.5
 -1 7 -1 11 10.1
 -1 7 -1 14.7 6.7
 -1 7 -1 7.1 8.5
 -1 7 -1 21.6 10.3
 1 -7 1 18.9 6
 1 -7 1 16.7 8.9
 1 -7 1 5.8 11
 1 -7 1 15.6 8.4
 1 -7 1 9.4 5.9
 1 -7 1 9.6 8.4
 -2 7 -1 -9.5 8.5
 -2 7 -1 -1.8 8.8
 -2 7 -1 3.2 6
 -2 7 -1 8.1 11.4
 2 -7 1 9.4 9.5
 2 -7 1 8 9.1
 2 -7 1 16.2 8.7
 2 -7 1 5.2 6.4
 2 -7 1 -1.1 11.6
 2 -7 1 8.6 3.9
 2 -7 1 -17.3 11.2
 -3 7 -1 56.09 15.5
 -3 7 -1 65.29 13.1
 3 -7 1 45.2 16.3
 3 -7 1 48.8 11.3
 3 -7 1 57.79 20.7
 3 -7 1 50.29 12.5
 3 -7 1 28.8 13.5
 3 -7 1 56.19 12.9
 -4 7 -1 -2.8 7.6
 -4 7 -1 0.2 14.7
 4 -7 1 16.7 9.8
 4 -7 1 19.8 8.4
 4 -7 1 -10.4 10.3
 4 -7 1 19.8 6.6
 4 -7 1 -22.8 16.6
 4 -7 1 -14.1 13
 4 -7 1 -13.8 17
 4 -7 1 46 16.6
 -5 7 -1 0.8 9.5
 -5 7 -1 25 17
 5 -7 1 4.3 8.3
 5 -7 1 23.4 14.5
 5 -7 1 18.9 15.3
 5 -7 1 8.1 9.9
 5 -7 1 6 15
 5 -7 1 1.1 17.7
 5 -7 1 11.7 11.1
 5 -7 1 -12 12.6
 -6 7 -1 21.4 12.7
 -6 7 -1 10.4 11.6
 -6 7 -1 19.2 19
 6 -7 1 23.2 16.5
 6 -7 1 12.9 15.3
 6 -7 1 -6.3 20
 6 -7 1 27 12.8
 6 -7 1 19.7 17.1
 6 -7 1 28.5 12.6
 6 -7 1 18.9 12.9
 -7 7 -1 189.38 24.2
 -7 7 -1 165.58 20
 -7 7 -1 228.48 33.6
 7 -7 1 232.88 27.3
 7 -7 1 152.48 21.6
 7 -7 1 215.28 26.1
 7 -7 1 177.38 21
 7 -7 1 172.88 25.2
 7 -7 1 225.78 26.8
 7 -7 1 205.78 35.1
 7 -7 1 197.58 23.5
 -8 7 -1 -0.8 28.5
 -8 7 -1 -6.2 18.2
 -8 7 -1 45.3 15.7
 8 -7 1 -2.1 19.5
 8 -7 1 50.19 17.2
 8 -7 1 38.3 21.5
 8 -7 1 38.3 17.8
 8 -7 1 43.3 25.6
 8 -7 1 4.9 28.2
 8 -7 1 12.8 19.3
 -9 7 -1 46 34.8
 -9 7 -1 39.8 22.4
 9 -7 1 36.1 22.3
 9 -7 1 28.6 20.1
 9 -7 1 35.6 31.4
 9 -7 1 22.3 44.1
 -10 7 -1 62.39 41.8
 -10 7 -1 5.5 26.8
 10 -7 1 2 39.4
 10 -7 1 -3.7 23.8
 10 -7 1 17.1 23
 -11 7 -1 67.89 48.9
 -11 7 -1 36.6 34.8
 11 -7 1 26.1 52.49
 11 -7 1 -35.5 26.9
 -12 7 -1 26.3 60.59
 -12 7 -1 -5 38.6
 12 -7 1 9.8 55.79
 -13 7 -1 103.69 71.59
 13 -7 1 31.6 69.59
 17 6 -1 -107.59 53.09
 17 6 -1 -89.29 58.19
 17 6 -1 45.2 57.49
 17 6 -1 184.48 69.69
 -17 -6 1 -1.5 57.29
 -17 -6 1 1.7 64.59
 16 6 -1 -25.8 53.69
 16 6 -1 -20.4 48.3
 16 6 -1 -68.89 51.89
 16 6 -1 43 54.89
 -16 -6 1 57.29 52.19
 -16 -6 1 -9.6 37.1
 -16 -6 1 -59.69 48
 15 6 -1 -11.3 44.6
 15 6 -1 3.3 40.8
 15 6 -1 61.59 43.8
 15 6 -1 -18.2 42.1
 -15 -6 1 9.2 31.8
 -15 -6 1 -19.2 38.9
 -15 -6 1 22.6 83.59
 14 6 -1 128.39 40.1
 14 6 -1 50.39 36.7
 14 6 -1 80.29 40.1
 -14 -6 1 75.69 31.1
 -14 -6 1 93.99 38.1
 -14 -6 1 148.99 39.2
 13 6 -1 96.09 40.3
 13 6 -1 62.19 29.8
 13 6 -1 16.4 31.8
 13 6 -1 38.1 26.6
 13 6 -1 62.19 32.2
 -13 -6 1 39.5 24.1
 -13 -6 1 48.2 33.4
 -13 -6 1 56.09 30.1
 12 6 -1 318.97 44.3
 12 6 -1 247.48 35.9
 12 6 -1 306.77 40.1
 12 6 -1 330.57 39.9
 12 6 -1 274.77 40.5
 -12 -6 1 295.27 41.1
 -12 -6 1 317.07 35.4
 -12 -6 1 290.27 31.7
 -12 -6 1 326.17 42.7
 -12 -6 1 204.98 35.1
 11 6 -1 2.4 22.1
 11 6 -1 23.9 16
 11 6 -1 31.8 22.8
 11 6 -1 33.2 23.7
 11 6 -1 38 25.2
 -11 -6 1 16.4 17.8
 -11 -6 1 -14.5 21.5
 -11 -6 1 12.2 21
 -11 -6 1 17.7 21.2
 -11 -6 1 39.1 14.9
 10 6 -1 46 20
 10 6 -1 44.6 20.7
 10 6 -1 14.1 12.9
 10 6 -1 12.3 18.1
 10 6 -1 43.4 23.4
 -10 -6 1 34.7 18
 -10 -6 1 31.9 20
 -10 -6 1 19.3 18.3
 -10 -6 1 52.69 16.6
 -10 -6 1 23.7 13.1
 9 6 -1 83.59 19.9
 9 6 -1 119.29 15.7
 9 6 -1 102.29 26.4
 9 6 -1 85.39 19.8
 9 6 -1 149.29 21.6
 9 6 -1 102.29 22.3
 9 6 -1 127.19 21.3
 -9 -6 1 128.89 18.2
 -9 -6 1 122.09 19.5
 -9 -6 1 113.99 20.7
 -9 -6 1 102.99 21.8
 -9 -6 1 110.49 16.5
 8 6 -1 5.8 13.4
 8 6 -1 21.3 8.6
 8 6 -1 -8.4 13.6
 8 6 -1 11.9 14.5
 8 6 -1 6.1 13.1
 8 6 -1 7.1 14.8
 8 6 -1 15.3 19.2
 8 6 -1 18.3 13
 8 6 -1 7.8 13.3
 8 6 -1 4.2 13.5
 -8 -6 1 -6.9 11.5
 -8 -6 1 -11.5 12.5
 -8 -6 1 -1.2 16.5
 -8 -6 1 12.4 10.5
 -8 -6 1 -5.6 14.9
 -8 -6 1 2.4 11.1
 -8 -6 1 -13.8 17.5
 -8 -6 1 14.2 16
 -8 -6 1 0.3 13.9
 7 6 -1 300.97 29.6
 7 6 -1 307.57 28.1
 7 6 -1 333.27 28.1
 7 6 -1 228.88 32.3
 7 6 -1 337.87 29.6
 7 6 -1 333.97 29.7
 7 6 -1 334.17 31.1
 7 6 -1 301.97 31.7
 7 6 -1 378.96 29.4
 -7 -6 1 308.97 29.3
 -7 -6 1 294.87 30.2
 -7 -6 1 302.37 32.4
 -7 -6 1 321.27 27.1
 -7 -6 1 375.76 30.1
 -7 -6 1 325.67 30.3
 -7 -6 1 254.17 32
 -7 -6 1 334.67 29.8
 6 6 -1 150.98 18.4
 6 6 -1 143.49 16.1
 6 6 -1 127.99 17.2
 6 6 -1 126.29 18.3
 6 6 -1 145.19 19
 6 6 -1 132.09 21.3
 6 6 -1 148.49 18.9
 6 6 -1 121.29 16.8
 6 6 -1 129.69 18.7
 6 6 -1 129.49 11.6
 -6 -6 1 170.78 19.4
 -6 -6 1 173.68 18.5
 -6 -6 1 148.79 18.3
 -6 -6 1 134.29 19.4
 -6 -6 1 121.89 19.2
 -6 -6 1 101.89 16.3
 -6 -6 1 141.99 19.2
 -6 -6 1 145.19 17.7
 5 6 -1 14.8 7.9
 5 6 -1 16.4 9.4
 5 6 -1 12.6 9.5
 5 6 -1 11.1 10.8
 5 6 -1 20.3 9.1
 5 6 -1 9.1 11.8
 5 6 -1 9.4 8.4
 5 6 -1 8 10.2
 5 6 -1 -5 6.9
 -5 -6 1 2.1 7.9
 -5 -6 1 1.6 9.6
 -5 -6 1 5.2 11.3
 -5 -6 1 12.7 7.4
 -5 -6 1 14.2 9.2
 -5 -6 1 13.9 9.2
 -5 -6 1 5.6 9.5
 -5 -6 1 9.7 9
 -5 -6 1 4.9 8.5
 4 6 -1 953.6 61.09
 4 6 -1 964 63.29
 4 6 -1 934.61 61.79
 4 6 -1 878.21 60.79
 4 6 -1 938.51 61.39
 4 6 -1 897.71 60.79
 4 6 -1 839.42 61.69
 4 6 -1 860.81 62.59
 4 6 -1 923.41 59.39
 -4 -6 1 1010.4 61.49
 -4 -6 1 863.31 60.99
 -4 -6 1 924.81 61.29
 -4 -6 1 913.11 62.59
 -4 -6 1 875.31 61.49
 -4 -6 1 923.51 60.59
 -4 -6 1 933.41 60.79
 -4 -6 1 866.01 61.89
 -4 -6 1 872.21 62.29
 3 6 -1 1942.41 123.39
 3 6 -1 1957.4 125.49
 3 6 -1 1959.6 124.79
 3 6 -1 1958.8 126.19
 3 6 -1 1985.3 125.49
 3 6 -1 1919.61 123.79
 3 6 -1 1892.61 125.49
 3 6 -1 1941.61 125.79
 3 6 -1 2036 127.19
 3 6 -1 1919.91 124.79
 -3 -6 1 1899.91 125.59
 -3 -6 1 1953.1 125.49
 -3 -6 1 1957.4 126.39
 -3 -6 1 1943.31 125.99
 -3 -6 1 2025.2 125.19
 -3 -6 1 1924.31 124.99
 -3 -6 1 1881.41 125.19
 -3 -6 1 1924.81 124.29
 2 6 -1 -8.5 4.8
 2 6 -1 -10.1 6.8
 2 6 -1 5.6 7.7
 2 6 -1 -3.7 6.6
 2 6 -1 -2 5.5
 2 6 -1 2.7 5
 -2 -6 1 -11.3 4.6
 -2 -6 1 -3.5 5.6
 -2 -6 1 9 6.1
 -2 -6 1 -0.3 4.1
 -2 -6 1 4.4 6.8
 -2 -6 1 -4.6 6.5
 -2 -6 1 3.2 6.5
 -2 -6 1 5.9 8.7
 -2 -6 1 -4.7 7.7
 1 6 -1 520.75 33
 1 6 -1 492.35 33.1
 1 6 -1 499.75 35.3
 1 6 -1 491.35 35.1
 1 6 -1 466.05 34.7
 1 6 -1 503.55 35.3
 -1 -6 1 465.75 34.5
 -1 -6 1 487.75 34.5
 -1 -6 1 531.65 36.9
 -1 -6 1 499.45 33.6
 -1 -6 1 519.55 34.7
 -1 -6 1 496.65 35.7
 -1 -6 1 542.95 35.3
 -1 -6 1 507.05 34.2
 0 6 -1 5.5 6.4
 0 6 -1 15.5 6.3
 0 6 -1 16.8 7.8
 0 6 -1 23.7 7.7
 0 6 -1 12.7 7.5
 0 -6 1 15.7 4.5
 0 -6 1 17.2 7.6
 0 -6 1 29.2 7.1
 0 -6 1 18.8 4.7
 0 -6 1 20.7 9.7
 0 -6 1 28.8 6.8
 0 -6 1 19.1 5.9
 0 -6 1 18.8 7.2
 0 -6 1 30.6 7.4
 -1 6 -1 171.88 18.1
 -1 6 -1 114.09 13.9
 -1 6 -1 160.98 16.2
 -1 6 -1 168.28 13.4
 1 -6 1 176.58 15.2
 1 -6 1 160.88 16.4
 1 -6 1 169.08 18.5
 1 -6 1 160.48 12.6
 1 -6 1 154.28 11.6
 1 -6 1 169.38 15.6
 1 -6 1 148.79 13.2
 1 -6 1 155.58 12.3
 1 -6 1 144.19 17.3
 -2 6 -1 11.8 10.3
 -2 6 -1 13.5 7.3
 -2 6 -1 -1.2 7.5
 -2 6 -1 4.7 5.1
 2 -6 1 5.9 6.5
 2 -6 1 -3.8 7.2
 2 -6 1 -5 9.4
 2 -6 1 8.7 8.3
 2 -6 1 -10.7 9.3
 -3 6 -1 350.86 31.2
 -3 6 -1 335.57 24.8
 3 -6 1 351.66 26.3
 3 -6 1 343.97 29.3
 3 -6 1 351.46 28.6
 3 -6 1 329.97 30.9
 3 -6 1 337.07 34.2
 3 -6 1 376.46 27.6
 -4 6 -1 -0.6 7
 -4 6 -1 5.3 12.5
 -4 6 -1 5.3 8.3
 -4 6 -1 -4.1 6.9
 4 -6 1 1.2 15.3
 4 -6 1 5.7 11.2
 4 -6 1 8.9 8.7
 4 -6 1 -14.5 9.6
 4 -6 1 0 14.3
 4 -6 1 -16.4 14.5
 -5 6 -1 9.9 14
 -5 6 -1 1.1 8.3
 -5 6 -1 9.9 8.6
 5 -6 1 -20.3 10.3
 5 -6 1 -23.6 16.6
 5 -6 1 4.5 11.4
 5 -6 1 11.9 9.9
 5 -6 1 2.4 9.2
 5 -6 1 15.4 7
 5 -6 1 4.3 12.6
 -6 6 -1 43.1 19.4
 -6 6 -1 29.9 17
 -6 6 -1 29.4 12.5
 -6 6 -1 33.6 11.3
 6 -6 1 34.6 21.3
 6 -6 1 35.3 15.8
 6 -6 1 40.3 12.7
 6 -6 1 46.2 15.6
 6 -6 1 55.29 13.1
 6 -6 1 48.3 14.6
 6 -6 1 46.1 15.5
 -7 6 -1 -12.5 11.8
 -7 6 -1 45.9 22
 -7 6 -1 -22.3 12.7
 -7 6 -1 22.2 20.4
 7 -6 1 11.1 11.7
 7 -6 1 -7.2 16.9
 7 -6 1 1.3 21
 7 -6 1 13.7 14.1
 7 -6 1 -0.1 14.3
 7 -6 1 2.6 15.3
 7 -6 1 17.3 13.3
 -8 6 -1 -8.2 16
 -8 6 -1 3.7 25.9
 -8 6 -1 15.2 15.1
 -8 6 -1 8.5 23.8
 8 -6 1 20.7 16.9
 8 -6 1 -6.5 16.3
 8 -6 1 1.5 18
 8 -6 1 8.2 15.5
 8 -6 1 13.8 15
 8 -6 1 -18.1 26.1
 8 -6 1 -1.8 22.5
 -9 6 -1 8.5 20.3
 -9 6 -1 8.4 29.6
 9 -6 1 52.29 30.5
 9 -6 1 -4.4 30.4
 9 -6 1 64.49 21.4
 9 -6 1 53.59 19.2
 9 -6 1 16.2 19.3
 9 -6 1 6 24.6
 9 -6 1 37 18.2
 9 -6 1 41.4 20.9
 -10 6 -1 -10.3 24.4
 -10 6 -1 -0.5 36.6
 10 -6 1 3.3 21.7
 10 -6 1 45.4 51.69
 10 -6 1 29 20.2
 -11 6 -1 -9 42.5
 -11 6 -1 22.6 32.4
 11 -6 1 33.2 41.8
 11 -6 1 3.5 25.9
 -12 6 -1 -47.4 49.99
 -12 6 -1 76.09 38.1
 12 -6 1 24.3 31.2
 12 -6 1 -30.3 49.4
 -13 6 -1 6 45.9
 -13 6 -1 -62.59 62.29
 13 -6 1 -7.9 61.79
 17 5 -1 8 58.39
 17 5 -1 85.29 60.09
 17 5 -1 -25.3 64.29
 17 5 -1 -18 63.09
 -17 -5 1 -45.6 47.4
 -17 -5 1 35 60.39
 -17 -5 1 8.7 56.69
 16 5 -1 6.2 57.59
 16 5 -1 4.4 47.8
 16 5 -1 17 50.39
 16 5 -1 18.2 52.29
 -16 -5 1 -11.5 49.6
 -16 -5 1 4.5 48.3
 -16 -5 1 -9 37
 15 5 -1 33.3 45.7
 15 5 -1 -7.8 40.7
 15 5 -1 25.6 42.9
 15 5 -1 21.2 46.3
 -15 -5 1 127.39 63.29
 -15 -5 1 13.1 40.8
 -15 -5 1 33 40.4
 14 5 -1 0.1 33.5
 14 5 -1 41.9 36.3
 14 5 -1 -17.4 35.9
 14 5 -1 66.49 36.8
 -14 -5 1 -2.2 35.1
 -14 -5 1 -17.1 30.3
 -14 -5 1 43.2 27.5
 13 5 -1 13.2 29.9
 13 5 -1 -0.5 56.69
 13 5 -1 -41.3 26.7
 13 5 -1 26.6 30.9
 13 5 -1 32.6 29.9
 -13 -5 1 -18.2 28
 -13 -5 1 9.2 30.1
 -13 -5 1 7.4 22.2
 12 5 -1 -18.5 25.1
 12 5 -1 -30.5 23.5
 12 5 -1 42.1 21.2
 12 5 -1 19.4 24
 12 5 -1 -15.8 24.4
 -12 -5 1 2.9 22.8
 -12 -5 1 -18.8 25.4
 -12 -5 1 -5.3 18.3
 11 5 -1 118.19 26.3
 11 5 -1 128.49 22
 11 5 -1 122.39 26.6
 11 5 -1 118.09 28.4
 11 5 -1 197.08 28.3
 11 5 -1 129.19 69.39
 -11 -5 1 170.98 23.1
 -11 -5 1 127.39 28.7
 -11 -5 1 140.69 25.9
 -11 -5 1 171.28 41.6
 -11 -5 1 151.78 21.9
 10 5 -1 21.4 14.3
 10 5 -1 -22.3 16.6
 10 5 -1 26.1 18.6
 10 5 -1 22.2 18.1
 10 5 -1 -7.4 27.3
 10 5 -1 -1.3 21.5
 -10 -5 1 8 13.5
 -10 -5 1 -5.5 18.6
 -10 -5 1 23.7 16.3
 -10 -5 1 31.4 17.4
 -10 -5 1 -1.8 10.8
 9 5 -1 91.19 14.4
 9 5 -1 106.39 20.6
 9 5 -1 33.7 23.2
 9 5 -1 62.49 18.9
 9 5 -1 78.89 19.1
 9 5 -1 58.89 19.6
 -9 -5 1 91.79 13.6
 -9 -5 1 82.49 15.4
 -9 -5 1 99.39 21.4
 -9 -5 1 94.39 19.3
 -9 -5 1 27.3 20.6
 -9 -5 1 94.39 22.6
 -9 -5 1 80.09 18
 8 5 -1 -13.3 12.6
 8 5 -1 13.2 9.1
 8 5 -1 9.4 12.6
 8 5 -1 17 14.9
 8 5 -1 -8.5 11.9
 8 5 -1 2.2 13.3
 8 5 -1 6.3 13.2
 8 5 -1 -17.9 12.3
 8 5 -1 -13.8 17.8
 -8 -5 1 31.5 15.5
 -8 -5 1 -16 16.3
 -8 -5 1 -2.7 16
 -8 -5 1 22.6 15.3
 -8 -5 1 4.8 11.8
 -8 -5 1 -2.6 11.1
 -8 -5 1 14.6 9.3
 -8 -5 1 -5.8 9.4
 -8 -5 1 19.3 15.2
 7 5 -1 6 10.6
 7 5 -1 9.5 10.6
 7 5 -1 9.6 11.1
 7 5 -1 0.9 15.2
 7 5 -1 0.5 11
 7 5 -1 9 11
 7 5 -1 11.7 7
 7 5 -1 26.7 12
 7 5 -1 10.4 13.1
 -7 -5 1 -11.4 12.5
 -7 -5 1 16.8 15.5
 -7 -5 1 12.4 11.8
 -7 -5 1 5.9 12.8
 -7 -5 1 11.8 9.7
 -7 -5 1 20 12.9
 -7 -5 1 22.6 8.9
 -7 -5 1 -8.4 11.5
 6 5 -1 10.1 13.5
 6 5 -1 42.4 11.3
 6 5 -1 56.49 11.4
 6 5 -1 62.09 11.8
 6 5 -1 61.29 14.1
 6 5 -1 50.59 7.4
 6 5 -1 45.4 11
 6 5 -1 33 12.4
 6 5 -1 49.7 11.9
 -6 -5 1 66.29 14.5
 -6 -5 1 56.29 12.7
 -6 -5 1 55.09 12.3
 -6 -5 1 42.2 12.1
 -6 -5 1 57.39 11.3
 -6 -5 1 44.7 10.5
 -6 -5 1 71.09 12
 -6 -5 1 59.09 12.9
 -6 -5 1 35.8 14.1
 5 5 -1 967.5 64.39
 5 5 -1 1017.3 65.39
 5 5 -1 967.7 65.69
 5 5 -1 945.51 63.09
 5 5 -1 922.41 66.19
 5 5 -1 935.41 64.19
 5 5 -1 921.41 60.89
 5 5 -1 959.6 64.09
 5 5 -1 964.6 63.89
 5 5 -1 981.6 64.09
 -5 -5 1 884.71 63.89
 -5 -5 1 896.91 65.09
 -5 -5 1 979.4 63.69
 -5 -5 1 967.8 64.39
 -5 -5 1 973 65.69
 -5 -5 1 1047.6 64.39
 -5 -5 1 912.11 64.89
 -5 -5 1 888.31 63.89
 4 5 -1 209.58 17
 4 5 -1 187.68 19.4
 4 5 -1 191.08 20.3
 4 5 -1 190.78 16.8
 4 5 -1 177.98 16.1
 4 5 -1 161.78 14.9
 4 5 -1 155.08 17.3
 4 5 -1 191.98 16.2
 -4 -5 1 155.18 15.4
 -4 -5 1 205.68 15.8
 -4 -5 1 158.98 16.3
 -4 -5 1 141.89 17.4
 -4 -5 1 154.88 17.7
 -4 -5 1 164.88 17.6
 -4 -5 1 179.58 18.4
 -4 -5 1 187.08 19.2
 -4 -5 1 148.39 15.9
 3 5 -1 926.61 61.49
 3 5 -1 869.01 58.59
 3 5 -1 944.21 60.99
 3 5 -1 911.41 60.99
 3 5 -1 931.71 61.29
 3 5 -1 918.91 60.39
 3 5 -1 909.51 59.79
 3 5 -1 910.71 59.79
 3 5 -1 904.41 59.89
 -3 -5 1 911.91 60.39
 -3 -5 1 887.41 60.99
 -3 -5 1 894.31 60.29
 -3 -5 1 893.91 59.49
 -3 -5 1 912.61 60.09
 -3 -5 1 889.91 59.59
 -3 -5 1 910.11 60.09
 -3 -5 1 941.41 61.19
 2 5 -1 815.62 51.99
 2 5 -1 825.12 50.79
 2 5 -1 796.02 52.79
 2 5 -1 762.92 51.59
 2 5 -1 831.82 53.19
 2 5 -1 692.63 53.49
 2 5 -1 826.72 52.79
 2 5 -1 851.61 52.09
 -2 -5 1 851.21 52.69
 -2 -5 1 772.32 53.99
 -2 -5 1 818.12 52.89
 -2 -5 1 759.82 51.89
 -2 -5 1 648.74 53.59
 -2 -5 1 776.02 51.39
 -2 -5 1 803.92 52.39
 -2 -5 1 831.92 53.79
 -2 -5 1 789.82 52.59
 1 5 -1 1725.33 111.79
 1 5 -1 1784.32 111.69
 1 5 -1 1807.02 111.89
 1 5 -1 1711.83 111.89
 1 5 -1 1839.62 112.19
 1 5 -1 1685.03 110.69
 1 5 -1 1710.93 110.69
 1 5 -1 1678.33 110.39
 -1 -5 1 1723.33 112.19
 -1 -5 1 1668.93 110.99
 -1 -5 1 1828.62 112.99
 -1 -5 1 1775.82 112.99
 -1 -5 1 1784.92 111.19
 -1 -5 1 1733.83 111.69
 -1 -5 1 1709.73 110.29
 -1 -5 1 1793.02 111.79
 -1 -5 1 1793.42 111.79
 -1 -5 1 1689.03 111.49
 0 5 -1 127.69 12.6
 0 5 -1 130.89 13.3
 0 5 -1 122.19 12.5
 0 5 -1 127.09 12.8
 0 -5 1 124.89 10.2
 0 -5 1 144.39 10.8
 0 -5 1 152.38 14.5
 0 -5 1 125.59 10.3
 0 -5 1 138.99 13.3
 0 -5 1 148.09 13.1
 0 -5 1 132.39 11.3
 0 -5 1 134.69 13.5
 0 -5 1 125.39 11.4
 -1 5 -1 19.6 7.4
 -1 5 -1 29.4 5
 -1 5 -1 26.7 6.9
 -1 5 -1 23.3 5.6
 1 -5 1 18.9 7.2
 1 -5 1 27.1 6.4
 1 -5 1 19.8 8.2
 1 -5 1 11.7 7
 1 -5 1 9.7 7.1
 1 -5 1 26.3 5.2
 -2 5 -1 45.6 8.3
 -2 5 -1 42 11
 2 -5 1 39.1 8.4
 2 -5 1 55.59 7.9
 2 -5 1 47.2 10.3
 2 -5 1 49.99 9.6
 2 -5 1 51.09 9.1
 -3 5 -1 51.29 12.9
 -3 5 -1 43.4 6.8
 3 -5 1 44.3 7.5
 3 -5 1 49.3 13.8
 3 -5 1 50.39 8.3
 3 -5 1 43.2 10.6
 3 -5 1 41 11.5
 3 -5 1 51.99 9
 -4 5 -1 351.46 28.7
 -4 5 -1 383.86 28.1
 -4 5 -1 344.07 26.7
 -4 5 -1 406.96 33.3
 4 -5 1 400.26 34.6
 4 -5 1 410.76 35.6
 4 -5 1 359.26 32.6
 4 -5 1 393.06 28.6
 4 -5 1 362.16 25.1
 4 -5 1 380.56 30.3
 4 -5 1 378.86 27.9
 4 -5 1 414.26 26
 -5 5 -1 2.4 11.5
 -5 5 -1 3.9 8.3
 -5 5 -1 16.7 13.2
 -5 5 -1 2.9 8.4
 5 -5 1 7.9 10.7
 5 -5 1 3.3 9.3
 5 -5 1 15.9 8.6
 5 -5 1 20.6 14
 5 -5 1 9.1 10.8
 5 -5 1 15.3 6.1
 5 -5 1 -1.8 14.1
 -6 5 -1 9.1 10.7
 -6 5 -1 13.6 10.6
 -6 5 -1 22.3 15.6
 -6 5 -1 6.7 15.2
 6 -5 1 13.2 11
 6 -5 1 3.7 11.3
 6 -5 1 2.4 10.3
 6 -5 1 26.5 12.5
 6 -5 1 1.9 13.9
 6 -5 1 -17.5 18.2
 6 -5 1 9.5 10.6
 6 -5 1 5.1 12.8
 -7 5 -1 23.8 18.7
 -7 5 -1 17.6 13.2
 -7 5 -1 26.1 18
 7 -5 1 -0.7 12.6
 7 -5 1 -5 13.2
 7 -5 1 17.3 13.2
 7 -5 1 -15.3 10.2
 7 -5 1 17.1 12.7
 7 -5 1 4.5 15.4
 7 -5 1 23.5 10.1
 7 -5 1 9.7 20.6
 7 -5 1 -19.3 14.5
 -8 5 -1 24.8 22.3
 -8 5 -1 23.3 23.5
 -8 5 -1 -5.3 15
 8 -5 1 14.1 15.3
 8 -5 1 12.1 12.7
 8 -5 1 42.8 15.3
 8 -5 1 25.6 13.7
 8 -5 1 17.2 15.2
 8 -5 1 43.6 16.9
 8 -5 1 13.6 19.4
 8 -5 1 26.6 25.4
 8 -5 1 41.7 18.9
 -9 5 -1 44.2 20.6
 -9 5 -1 43.1 28.6
 -9 5 -1 10.2 17
 9 -5 1 54.39 27.7
 9 -5 1 97.59 19.5
 9 -5 1 46.8 19.1
 9 -5 1 59.59 19.8
 9 -5 1 95.99 26.2
 9 -5 1 57.89 17
 9 -5 1 25.3 24.2
 9 -5 1 56.89 25
 9 -5 1 85.69 18
 -10 5 -1 -17.3 20
 -10 5 -1 -35.7 21.4
 10 -5 1 40.4 19.5
 10 -5 1 34.1 19.6
 10 -5 1 32.2 28.5
 10 -5 1 27.4 21.9
 10 -5 1 -17 19.8
 10 -5 1 -51.09 33.9
 10 -5 1 11.3 21.5
 -11 5 -1 17.9 38.8
 -11 5 -1 -24.8 25.8
 11 -5 1 2.3 20.5
 11 -5 1 27.1 24.4
 11 -5 1 -5.1 23.4
 11 -5 1 21.2 43.6
 -12 5 -1 -9 48.1
 -12 5 -1 3.6 35
 12 -5 1 14.5 29.8
 12 -5 1 13.5 29.2
 12 -5 1 24.6 44.6
 -13 5 -1 8.1 57.19
 -13 5 -1 63.29 43.3
 13 -5 1 -8.4 51.69
 13 -5 1 11.7 35.2
 13 -5 1 9.7 36.7
 -14 5 -1 150.58 55.79
 -14 5 -1 -23 67.79
 14 -5 1 -31.3 64.29
 17 4 -1 -72.99 55.39
 16 4 -1 -79.99 54.69
 16 4 -1 -30.1 56.19
 16 4 -1 -11.6 48.7
 16 4 -1 -21 51.49
 -16 -4 1 33.4 44.5
 -16 -4 1 51.09 48.5
 -16 -4 1 -67.19 48.6
 15 4 -1 -38.6 43
 15 4 -1 -10.1 41.2
 15 4 -1 -39.4 44.3
 15 4 -1 -70.49 42.9
 -15 -4 1 -66.69 30.1
 -15 -4 1 -7.2 42.8
 -15 -4 1 8.9 38
 14 4 -1 -34.8 33.6
 14 4 -1 -7.1 36.5
 14 4 -1 49.7 38.9
 14 4 -1 2.3 35
 -14 -4 1 -3.9 24.6
 -14 -4 1 7.4 37.1
 -14 -4 1 -49.8 28.8
 13 4 -1 8 29.2
 13 4 -1 39.1 31.8
 13 4 -1 -24.7 35.8
 13 4 -1 52.19 30
 -13 -4 1 14.8 28.8
 -13 -4 1 26.1 31.3
 -13 -4 1 51.39 22.7
 12 4 -1 0.7 25.3
 12 4 -1 -5.2 24.3
 12 4 -1 -12.5 23.7
 12 4 -1 -10.1 23.1
 12 4 -1 -33.4 22.5
 12 4 -1 31.4 47.3
 -12 -4 1 2.5 22.6
 -12 -4 1 -3.7 18.3
 -12 -4 1 -29.6 24.1
 11 4 -1 58.89 33.5
 11 4 -1 83.89 25
 11 4 -1 88.89 35
 11 4 -1 105.39 38.5
 11 4 -1 119.29 24.9
 11 4 -1 95.09 21.4
 -11 -4 1 96.09 24.3
 -11 -4 1 84.39 26.4
 -11 -4 1 71.19 23
 -11 -4 1 128.39 21
 10 4 -1 62.29 16.7
 10 4 -1 94.49 21.8
 10 4 -1 3.8 27.5
 10 4 -1 49.7 23.6
 10 4 -1 79.39 20.9
 10 4 -1 84.49 19.3
 -10 -4 1 45.9 18.2
 -10 -4 1 52.19 18.3
 -10 -4 1 93.99 16.6
 -10 -4 1 69.29 21.1
 9 4 -1 32.7 15.6
 9 4 -1 68.29 16
 9 4 -1 34.8 19.4
 9 4 -1 32.3 17.8
 9 4 -1 22.8 15.7
 9 4 -1 44.6 22.5
 9 4 -1 64.29 13.8
 -9 -4 1 24.6 12.7
 -9 -4 1 53.19 18.8
 -9 -4 1 45.8 15.1
 -9 -4 1 40.8 19.6
 -9 -4 1 72.89 20.2
 -9 -4 1 45.9 10.3
 -9 -4 1 29 14.7
 8 4 -1 147.79 19.4
 8 4 -1 138.89 19.9
 8 4 -1 156.68 22.9
 8 4 -1 135.89 19.1
 8 4 -1 159.48 23.2
 8 4 -1 161.98 20.4
 8 4 -1 214.58 29.4
 8 4 -1 120.59 19.9
 8 4 -1 157.88 17.3
 -8 -4 1 159.88 21.8
 -8 -4 1 132.39 21.7
 -8 -4 1 134.49 22.7
 -8 -4 1 149.79 18.4
 -8 -4 1 158.88 21.5
 -8 -4 1 147.29 24.1
 -8 -4 1 190.38 25.5
 -8 -4 1 191.78 22.7
 -8 -4 1 115.79 16.5
 7 4 -1 552.54 38.7
 7 4 -1 485.95 41.9
 7 4 -1 512.35 39.7
 7 4 -1 472.45 37.3
 7 4 -1 462.85 38.7
 7 4 -1 473.45 38.2
 7 4 -1 463.45 37.7
 7 4 -1 541.15 41
 -7 -4 1 516.25 38.8
 -7 -4 1 478.75 39.3
 -7 -4 1 453.05 40.6
 -7 -4 1 542.15 38.8
 -7 -4 1 498.55 39.3
 -7 -4 1 474.25 41.3
 -7 -4 1 530.35 41
 6 4 -1 59.19 12.3
 6 4 -1 55.59 11.8
 6 4 -1 39.8 9.9
 6 4 -1 33 11.7
 6 4 -1 56.19 10.7
 6 4 -1 18.5 13
 6 4 -1 49.2 10.7
 6 4 -1 51.89 8
 6 4 -1 39.9 13.1
 -6 -4 1 50.89 13.7
 -6 -4 1 49.8 11.8
 -6 -4 1 72.29 14.6
 -6 -4 1 56.89 10.4
 -6 -4 1 48.6 11.3
 -6 -4 1 69.09 12.5
 -6 -4 1 39.7 10.3
 -6 -4 1 28.4 12.8
 5 4 -1 9.2 7.5
 5 4 -1 -8 8.9
 5 4 -1 8.8 7.1
 5 4 -1 5.9 6.7
 5 4 -1 5.3 8.5
 5 4 -1 2.5 4
 5 4 -1 14.5 9
 5 4 -1 12.5 6.8
 5 4 -1 5.1 7.4
 -5 -4 1 18.1 8.2
 -5 -4 1 12.5 9.1
 -5 -4 1 4.6 9.1
 -5 -4 1 2.7 7.4
 -5 -4 1 13.2 6.7
 -5 -4 1 7.7 7.9
 -5 -4 1 5.4 5.9
 -5 -4 1 -5.8 7.8
 4 4 -1 293.27 22.9
 4 4 -1 308.47 23
 4 4 -1 328.37 23.3
 4 4 -1 313.17 24.6
 4 4 -1 317.77 23.3
 4 4 -1 325.37 25.6
 4 4 -1 265.47 23
 4 4 -1 315.87 24.5
 4 4 -1 260.37 24.3
 -4 -4 1 300.47 24.3
 -4 -4 1 304.97 23.4
 -4 -4 1 309.67 23.5
 -4 -4 1 316.27 24.6
 -4 -4 1 330.77 23.4
 -4 -4 1 265.07 23.1
 -4 -4 1 283.97 24.4
 -4 -4 1 312.27 22.9
 3 4 -1 30.5 8.5
 3 4 -1 17.2 5.9
 3 4 -1 20.4 6
 3 4 -1 18.7 6.8
 3 4 -1 16.1 6
 3 4 -1 25.5 7.5
 3 4 -1 20.1 5.9
 3 4 -1 14 5.5
 -3 -4 1 17.9 5.6
 -3 -4 1 20 6.2
 -3 -4 1 12.7 6.8
 -3 -4 1 22.5 5.2
 -3 -4 1 22 5.9
 -3 -4 1 20.5 6.2
 -3 -4 1 19.8 6.7
 -3 -4 1 14.6 6.6
 2 4 -1 771.12 49.4
 2 4 -1 724.43 48
 2 4 -1 700.83 47.2
 2 4 -1 688.43 48.8
 2 4 -1 757.02 48.1
 2 4 -1 708.63 48.7
 2 4 -1 734.03 47.2
 2 4 -1 741.13 48.5
 2 4 -1 780.52 48.7
 -2 -4 1 766.42 48.9
 -2 -4 1 740.03 48.3
 -2 -4 1 722.83 48.7
 -2 -4 1 738.03 49.1
 -2 -4 1 765.62 48.2
 -2 -4 1 761.42 49.3
 -2 -4 1 682.93 47.7
 -2 -4 1 707.43 48
 1 4 -1 151.38 12.5
 1 4 -1 149.39 13.1
 1 4 -1 161.78 12.9
 1 4 -1 151.68 12.9
 1 4 -1 173.18 13.5
 1 4 -1 152.88 10.9
 1 4 -1 149.79 11.4
 1 4 -1 151.18 11.8
 1 4 -1 147.89 11.8
 -1 -4 1 171.28 11.1
 -1 -4 1 149.39 11.1
 -1 -4 1 155.48 12.6
 -1 -4 1 167.18 14.5
 -1 -4 1 173.08 13
 -1 -4 1 160.78 14.3
 -1 -4 1 140.69 12.9
 -1 -4 1 171.28 13.9
 -1 -4 1 160.48 12.9
 -1 -4 1 158.08 12.1
 0 4 -1 665.23 43.7
 0 4 -1 675.63 44.3
 0 4 -1 707.63 45.5
 0 4 -1 665.13 45
 0 -4 1 713.63 45.5
 0 -4 1 637.14 43.1
 0 -4 1 651.63 44.7
 0 -4 1 656.23 43.4
 0 -4 1 712.63 44.1
 0 -4 1 695.03 45.1
 0 -4 1 660.83 43.6
 0 -4 1 700.13 44.8
 0 -4 1 688.33 43.3
 0 -4 1 623.34 43.6
 -1 4 -1 443.16 32.2
 -1 4 -1 463.85 32.8
 -1 4 -1 463.05 29.9
 -1 4 -1 457.05 31.3
 -1 4 -1 437.86 30.2
 1 -4 1 480.45 32.7
 1 -4 1 456.75 31.5
 1 -4 1 464.25 31.8
 1 -4 1 475.15 31.7
 1 -4 1 484.05 32.7
 -2 4 -1 337.47 24.7
 -2 4 -1 328.17 25.5
 -2 4 -1 359.46 23.6
 2 -4 1 360.46 26.8
 2 -4 1 392.26 26.3
 2 -4 1 323.87 23.5
 2 -4 1 357.96 26
 2 -4 1 351.96 24.8
 -3 4 -1 39.1 6.3
 -3 4 -1 59.79 11.1
 -3 4 -1 43.5 7.9
 -3 4 -1 31.3 8.6
 -3 4 -1 45 7.2
 3 -4 1 51.19 8.5
 3 -4 1 45.8 9.4
 3 -4 1 49.5 7.2
 3 -4 1 62.79 8.6
 3 -4 1 40.3 10.4
 3 -4 1 18.5 11.8
 -4 4 -1 63.49 9.9
 -4 4 -1 70.29 13.7
 -4 4 -1 51.09 10
 -4 4 -1 50.49 8
 -4 4 -1 63.39 9.2
 4 -4 1 73.19 9.5
 4 -4 1 60.99 9.5
 4 -4 1 50.89 9.5
 4 -4 1 54.79 7.8
 4 -4 1 58.89 15.3
 4 -4 1 53.79 13.4
 4 -4 1 51.79 10.6
 -5 4 -1 213.48 24.6
 -5 4 -1 224.18 19.8
 -5 4 -1 177.48 21
 -5 4 -1 199.98 19.4
 5 -4 1 223.18 16.7
 5 -4 1 218.98 27.3
 5 -4 1 235.38 18.9
 5 -4 1 199.58 19.9
 5 -4 1 200.58 16.4
 5 -4 1 227.88 20.4
 5 -4 1 240.38 24.9
 5 -4 1 240.28 21.3
 5 -4 1 210.68 20.4
 5 -4 1 196.18 18.8
 -6 4 -1 -2.6 9.4
 -6 4 -1 24 13.3
 -6 4 -1 9.9 8.2
 -6 4 -1 13.6 13.1
 6 -4 1 15.8 7.4
 6 -4 1 14.7 13.4
 6 -4 1 3.9 10
 6 -4 1 15.9 12.9
 6 -4 1 -3.3 14.5
 6 -4 1 6 11.1
 6 -4 1 -5.2 11.2
 6 -4 1 12.1 10.9
 6 -4 1 -3.1 8.9
 6 -4 1 -12.1 8.6
 -7 4 -1 6.2 10.9
 -7 4 -1 -5.5 9.2
 -7 4 -1 12.4 12
 -7 4 -1 39.7 16.6
 -7 4 -1 6 15.6
 7 -4 1 -24.4 15.2
 7 -4 1 -3.4 12.1
 7 -4 1 -9 9.8
 7 -4 1 -16.2 10.8
 7 -4 1 22.4 13.8
 7 -4 1 -17.1 18.9
 7 -4 1 4.2 9.4
 7 -4 1 17.4 12.7
 7 -4 1 -19.1 16.6
 7 -4 1 5.2 12.2
 -8 4 -1 244.18 29.4
 -8 4 -1 172.28 29.1
 -8 4 -1 158.48 23.6
 -8 4 -1 184.68 22.6
 -8 4 -1 281.97 33.9
 8 -4 1 238.18 26.9
 8 -4 1 227.98 24.6
 8 -4 1 209.78 23.7
 8 -4 1 217.68 27.8
 8 -4 1 291.17 35
 8 -4 1 286.77 33.6
 8 -4 1 238.68 32.2
 8 -4 1 246.28 32.3
 8 -4 1 239.78 28.2
 -9 4 -1 21 18.5
 -9 4 -1 14.3 17.2
 -9 4 -1 47.4 25.7
 9 -4 1 13.3 23.8
 9 -4 1 58.49 18.2
 9 -4 1 30 17
 9 -4 1 31.3 16.7
 9 -4 1 47.5 18.8
 9 -4 1 6.2 26.1
 9 -4 1 -1.2 19
 9 -4 1 5.4 23.7
 9 -4 1 39.6 15.6
 -10 4 -1 229.68 33.6
 -10 4 -1 255.57 34.2
 -10 4 -1 271.37 40.9
 10 -4 1 198.58 37.8
 10 -4 1 205.28 28.8
 10 -4 1 227.28 29.2
 10 -4 1 207.58 30.6
 10 -4 1 230.98 29.1
 10 -4 1 233.68 35.6
 10 -4 1 245.98 27.2
 -11 4 -1 135.89 41.4
 -11 4 -1 68.69 27.6
 -11 4 -1 36.9 24.7
 11 -4 1 112.69 37.8
 11 -4 1 78.89 21.7
 11 -4 1 91.89 25.1
 11 -4 1 80.69 26.5
 -12 4 -1 47.2 45.8
 -12 4 -1 -9.1 30.4
 12 -4 1 37.6 30.1
 12 -4 1 53.99 24.6
 12 -4 1 -35.5 40.3
 12 -4 1 68.19 28.8
 -13 4 -1 -79.69 50.59
 -13 4 -1 0.9 38.8
 13 -4 1 73.19 38
 13 -4 1 22.5 32.5
 13 -4 1 46.5 51.09
 -14 4 -1 66.49 50.49
 14 -4 1 -72.59 45.6
 14 -4 1 -84.79 57.79
 16 3 -1 -133.79 47.6
 16 3 -1 30.8 50.09
 16 3 -1 -67.79 55.69
 16 3 -1 -21.3 50.39
 -16 -3 1 39.2 51.79
 -16 -3 1 -106.39 45.2
 15 3 -1 7.7 47.7
 15 3 -1 11.5 61.49
 15 3 -1 -10.5 52.89
 -15 -3 1 20.8 30.6
 -15 -3 1 34.9 46.4
 -15 -3 1 47.6 40
 14 3 -1 44.6 36.1
 14 3 -1 -30.3 35.2
 14 3 -1 16.9 36.7
 14 3 -1 54.19 34.9
 -14 -3 1 -1.9 35.6
 -14 -3 1 -45.2 30.7
 -14 -3 1 16.5 25.2
 13 3 -1 53.79 29.8
 13 3 -1 66.99 59.39
 13 3 -1 30.6 29.2
 13 3 -1 -4.6 28.7
 13 3 -1 15.9 31
 -13 -3 1 26.4 30.3
 -13 -3 1 22 21.4
 -13 -3 1 25.1 29.1
 12 3 -1 -7.4 23.3
 12 3 -1 4.2 24.1
 12 3 -1 -27.2 24.9
 12 3 -1 -101.49 39.4
 12 3 -1 15.2 29.1
 12 3 -1 3.3 23.7
 -12 -3 1 -14.4 22.5
 -12 -3 1 12 17.6
 -12 -3 1 15.2 28.9
 11 3 -1 39.3 22.6
 11 3 -1 21.3 21.1
 11 3 -1 58.39 24.9
 11 3 -1 15.5 22.9
 11 3 -1 20.1 20.4
 11 3 -1 25.8 32.1
 -11 -3 1 53.69 17.1
 -11 -3 1 68.49 22.2
 -11 -3 1 72.69 25.2
 10 3 -1 135.29 23.8
 10 3 -1 111.29 22.9
 10 3 -1 82.49 19.7
 10 3 -1 103.89 19.3
 10 3 -1 86.39 29.8
 10 3 -1 73.59 22.5
 -10 -3 1 121.29 23.2
 -10 -3 1 97.49 23.7
 -10 -3 1 124.19 25.9
 -10 -3 1 79.09 20.4
 -10 -3 1 103.29 16.9
 9 3 -1 -3.8 14.7
 9 3 -1 18.3 15.6
 9 3 -1 33.1 15.5
 9 3 -1 -2.2 12.3
 9 3 -1 38.4 16
 9 3 -1 7.5 16.6
 9 3 -1 11.8 22.2
 9 3 -1 28.7 13.4
 -9 -3 1 25.5 17.2
 -9 -3 1 -17.4 13.4
 -9 -3 1 12.6 11.1
 -9 -3 1 41.7 18.3
 -9 -3 1 1.9 11.9
 8 3 -1 58.19 17.7
 8 3 -1 40 13.6
 8 3 -1 33.6 13.3
 8 3 -1 64.79 16.2
 8 3 -1 20.5 12.4
 8 3 -1 47.2 14.8
 8 3 -1 3.2 17.3
 8 3 -1 2.5 12.9
 8 3 -1 36.8 10.8
 -8 -3 1 28.6 14.6
 -8 -3 1 33.3 17.3
 -8 -3 1 30.5 12.8
 -8 -3 1 38.1 17
 -8 -3 1 35.8 10.8
 -8 -3 1 40.9 13.1
 -8 -3 1 47.8 16.2
 -8 -3 1 42.4 16.8
 7 3 -1 127.09 17.8
 7 3 -1 110.19 15.7
 7 3 -1 90.79 14.5
 7 3 -1 87.49 15
 7 3 -1 110.59 15
 7 3 -1 89.49 16
 7 3 -1 109.99 20.6
 7 3 -1 98.99 15.1
 7 3 -1 94.09 17.2
 -7 -3 1 101.09 16
 -7 -3 1 115.09 16.3
 -7 -3 1 100.89 18.4
 -7 -3 1 120.59 19.4
 -7 -3 1 102.89 18.1
 -7 -3 1 110.99 17.8
 -7 -3 1 114.39 16.6
 6 3 -1 93.89 10.8
 6 3 -1 79.29 13.5
 6 3 -1 88.89 15.7
 6 3 -1 75.29 12.6
 6 3 -1 58.39 11.3
 6 3 -1 84.89 14.7
 6 3 -1 72.29 15.5
 6 3 -1 84.89 12.4
 6 3 -1 81.89 13
 -6 -3 1 73.69 12.8
 -6 -3 1 78.19 14.5
 -6 -3 1 108.99 14.3
 -6 -3 1 69.09 14.1
 -6 -3 1 91.99 13.4
 -6 -3 1 88.99 12.1
 -6 -3 1 63.39 13.3
 -6 -3 1 86.99 13.6
 5 3 -1 2.8 6.7
 5 3 -1 2.4 6.3
 5 3 -1 -4.6 6.6
 5 3 -1 9.2 7.4
 5 3 -1 12.4 8
 5 3 -1 -3.6 6.5
 5 3 -1 2 7.5
 5 3 -1 14.8 9.4
 -5 -3 1 5.7 6
 -5 -3 1 1.9 6.6
 -5 -3 1 -5.7 6.8
 -5 -3 1 -6.2 6.9
 -5 -3 1 -0.5 5.8
 -5 -3 1 9.4 8.6
 -5 -3 1 7.8 9.1
 4 3 -1 55.99 11.3
 4 3 -1 80.89 11.5
 4 3 -1 59.49 8.8
 4 3 -1 63.89 9.1
 4 3 -1 55.29 8.7
 4 3 -1 44.3 9.4
 4 3 -1 50.19 6.1
 4 3 -1 67.19 9.2
 4 3 -1 53.39 8.7
 -4 -3 1 85.19 12
 -4 -3 1 59.49 11.2
 -4 -3 1 69.39 9.5
 -4 -3 1 54.79 8.9
 -4 -3 1 65.39 8.9
 -4 -3 1 60.19 8.2
 -4 -3 1 58.49 9.5
 -4 -3 1 67.39 10.8
 3 3 -1 1384.56 99.19
 3 3 -1 1496.95 97.79
 3 3 -1 1429.66 97.69
 3 3 -1 1534.35 97.39
 3 3 -1 1506.75 97.29
 3 3 -1 1509.65 96.79
 3 3 -1 1539.25 97.29
 3 3 -1 1464.15 98.29
 -3 -3 1 1516.65 97.29
 -3 -3 1 1609.74 98.29
 -3 -3 1 1546.65 98.59
 -3 -3 1 1581.04 97.59
 -3 -3 1 1495.15 97.09
 -3 -3 1 1550.54 97.29
 -3 -3 1 1548.65 98.09
 2 3 -1 77.29 8
 2 3 -1 63.39 7
 2 3 -1 73.29 8.6
 2 3 -1 61.19 8.9
 2 3 -1 82.59 9.7
 2 3 -1 68.29 9.4
 2 3 -1 67.59 8.3
 2 3 -1 72.29 7.6
 -2 -3 1 71.39 7.8
 -2 -3 1 68.09 7.8
 -2 -3 1 74.29 9.2
 -2 -3 1 72.49 7.5
 -2 -3 1 81.69 9
 -2 -3 1 63.69 8.9
 -2 -3 1 66.59 8.1
 -2 -3 1 79.39 8.4
 1 3 -1 7081.69 441.96
 1 3 -1 6854.91 442.26
 1 3 -1 6819.22 442.26
 1 3 -1 7590.34 442.36
 1 3 -1 6746.12 442.76
 1 3 -1 7573.64 442.76
 1 3 -1 6477.35 442.56
 1 3 -1 6801.22 442.16
 -1 -3 1 6699.03 442.06
 -1 -3 1 6741.23 442.76
 -1 -3 1 6909.31 442.66
 -1 -3 1 7143.09 442.36
 -1 -3 1 7150.98 442.76
 -1 -3 1 7950.3 442.86
 -1 -3 1 6789.72 442.36
 -1 -3 1 7244.67 441.96
 -1 -3 1 7161.68 443.26
 0 3 -1 -4.4 3.5
 0 3 -1 -4.2 2.8
 0 3 -1 0 3.2
 0 3 -1 4.7 4.7
 0 3 -1 8.8 3.9
 0 -3 1 2 2.5
 0 -3 1 1.3 2
 0 -3 1 4.8 3.1
 0 -3 1 1.4 2.4
 0 -3 1 -0.4 4.4
 0 -3 1 1.6 3.8
 0 -3 1 -2.4 2.8
 0 -3 1 -1.5 2
 -1 3 -1 25.3 5.8
 -1 3 -1 29.5 4.7
 -1 3 -1 20.6 5.7
 1 -3 1 34.1 6.3
 1 -3 1 27.6 5.3
 1 -3 1 31.2 6.3
 1 -3 1 27 5.6
 1 -3 1 26.7 4.2
 -2 3 -1 382.46 28.3
 -2 3 -1 418.46 27.1
 -2 3 -1 431.76 29.6
 2 -3 1 397.96 27.4
 2 -3 1 402.46 28.6
 2 -3 1 421.26 30
 2 -3 1 399.76 26.9
 2 -3 1 409.06 27
 2 -3 1 399.36 29.3
 -3 3 -1 125.09 12.3
 -3 3 -1 96.09 10.9
 -3 3 -1 138.19 16.5
 -3 3 -1 130.29 11.2
 -3 3 -1 107.59 10
 3 -3 1 116.19 10.6
 3 -3 1 158.88 16.9
 3 -3 1 125.09 11
 3 -3 1 124.19 14.1
 3 -3 1 109.79 11
 3 -3 1 114.49 12.9
 -4 3 -1 28.4 6.8
 -4 3 -1 14.9 7
 -4 3 -1 21.3 10.7
 -4 3 -1 9.6 7.7
 4 -3 1 21.4 9.9
 4 -3 1 20.2 6.5
 4 -3 1 16.9 5.1
 4 -3 1 3.4 7.8
 4 -3 1 33.3 10.2
 4 -3 1 22.7 6.2
 4 -3 1 17.4 6.1
 -5 3 -1 312.07 24.6
 -5 3 -1 253.37 25.9
 -5 3 -1 345.07 32
 -5 3 -1 349.77 29
 -5 3 -1 336.07 27.3
 5 -3 1 338.27 24.4
 5 -3 1 326.67 22.6
 5 -3 1 355.36 31.2
 5 -3 1 349.57 25.4
 5 -3 1 311.97 26.2
 5 -3 1 275.67 26.2
 5 -3 1 331.07 24.5
 5 -3 1 322.97 28.8
 -6 3 -1 67.99 16.1
 -6 3 -1 81.79 12.5
 -6 3 -1 98.79 14.6
 -6 3 -1 86.69 18.5
 -6 3 -1 96.49 16.5
 6 -3 1 69.79 19.1
 6 -3 1 89.19 10.9
 6 -3 1 94.29 14.3
 6 -3 1 90.29 12.9
 6 -3 1 98.89 17.9
 6 -3 1 81.19 12.5
 6 -3 1 103.59 16.6
 6 -3 1 101.89 13.5
 6 -3 1 94.09 13.4
 6 -3 1 81.99 13.3
 -7 3 -1 111.79 22
 -7 3 -1 85.69 15.5
 -7 3 -1 89.29 14.8
 -7 3 -1 91.79 13
 -7 3 -1 77.59 18.6
 -7 3 -1 110.79 20.8
 7 -3 1 89.39 16.6
 7 -3 1 62.49 18.4
 7 -3 1 75.49 14.9
 7 -3 1 102.59 13.8
 7 -3 1 99.79 20.6
 7 -3 1 109.99 14.5
 7 -3 1 98.19 12.7
 7 -3 1 100.39 20.2
 -8 3 -1 -8.7 12.9
 -8 3 -1 23.6 10.4
 -8 3 -1 -23.7 16.8
 -8 3 -1 9.8 13.4
 -8 3 -1 -5 19.2
 8 -3 1 -13.9 13.4
 8 -3 1 14.6 20.9
 8 -3 1 16.4 14.6
 8 -3 1 -1.9 18.6
 8 -3 1 7 13.2
 8 -3 1 -14.4 19.2
 8 -3 1 10.5 15.2
 8 -3 1 9.8 11.8
 -9 3 -1 31.5 18.5
 -9 3 -1 47.7 22.6
 -9 3 -1 -19.3 17.1
 9 -3 1 33.5 23.9
 9 -3 1 23.7 20.2
 9 -3 1 -24.8 14.7
 9 -3 1 27.7 16.2
 9 -3 1 48.1 14.5
 9 -3 1 -29.1 23.2
 9 -3 1 15.8 15.2
 9 -3 1 29.8 19.1
 -10 3 -1 28.8 27
 -10 3 -1 -14.3 19.2
 -10 3 -1 3.9 19.8
 10 -3 1 13 19
 10 -3 1 8 27.3
 10 -3 1 -24.5 28.5
 10 -3 1 36.8 19.5
 10 -3 1 -22.9 16.8
 10 -3 1 9.1 16.1
 -11 3 -1 10.8 32.3
 -11 3 -1 45.5 24.4
 -11 3 -1 5 24.3
 11 -3 1 -3.3 34.1
 11 -3 1 12.9 24.4
 11 -3 1 21.7 19.4
 11 -3 1 -7.8 33.3
 11 -3 1 -0.6 20.9
 -12 3 -1 -41.2 39
 -12 3 -1 -32.2 29.2
 12 -3 1 -31.4 24.6
 12 -3 1 1.5 22.2
 12 -3 1 17.4 29.1
 12 -3 1 16.5 39
 -13 3 -1 -35.9 34.1
 -13 3 -1 -30.9 44.5
 13 -3 1 8.5 26.8
 13 -3 1 -44.7 42.3
 13 -3 1 17.8 31.8
 13 -3 1 5.1 38.2
 -14 3 -1 30.8 46.6
 14 -3 1 51.69 45.4
 14 -3 1 -13.2 67.09
 14 -3 1 -61.09 46.7
 -15 3 -1 140.79 56.99
 15 -3 1 64.39 49.3
 15 -3 1 26.1 66.69
 15 -3 1 -143.09 54.89
 16 2 -1 -4.4 49.5
 16 2 -1 -43.1 55.69
 16 2 -1 57.19 52.69
 16 2 -1 14.9 57.49
 -16 -2 1 -27.7 51.09
 15 2 -1 14 49.3
 15 2 -1 -91.99 39.7
 15 2 -1 -23.9 42.3
 15 2 -1 -113.99 42.3
 -15 -2 1 9.4 45.3
 -15 -2 1 -41.2 27.8
 -15 -2 1 5.5 40.8
 14 2 -1 11.6 37.9
 14 2 -1 -14.8 33.4
 14 2 -1 -14.3 36.3
 14 2 -1 33.5 36.1
 -14 -2 1 -35.4 35.3
 -14 -2 1 4.3 32.8
 -14 -2 1 -7.5 24.6
 13 2 -1 26 29.2
 13 2 -1 10.3 29.7
 13 2 -1 15.4 32.7
 13 2 -1 -44.3 50.29
 13 2 -1 8.2 31.1
 -13 -2 1 2.6 21
 -13 -2 1 29.2 30.1
 -13 -2 1 21.3 30.5
 12 2 -1 1.7 24.4
 12 2 -1 -29 27.7
 12 2 -1 23.7 23.8
 12 2 -1 -68.79 42.2
 12 2 -1 22.5 25.7
 -12 -2 1 10.7 23.5
 -12 -2 1 12.3 26.4
 -12 -2 1 -26.2 16.8
 11 2 -1 14.6 19.3
 11 2 -1 17.5 20.7
 11 2 -1 -4.9 20.9
 11 2 -1 -33.9 21.8
 11 2 -1 6.5 33
 11 2 -1 4.3 19.8
 -11 -2 1 0.1 18.9
 -11 -2 1 -4.6 22.4
 -11 -2 1 2.7 14.5
 -11 -2 1 -17.9 27.5
 10 2 -1 63.59 29.1
 10 2 -1 72.79 20.6
 10 2 -1 41.5 19.8
 10 2 -1 97.19 19.6
 10 2 -1 74.39 19.6
 10 2 -1 37.4 20.9
 -10 -2 1 102.89 23.1
 -10 -2 1 69.49 18.6
 -10 -2 1 81.79 15.8
 -10 -2 1 90.39 21.5
 -10 -2 1 58.69 23.5
 9 2 -1 60.79 18.9
 9 2 -1 52.29 15.6
 9 2 -1 58.89 17.2
 9 2 -1 57.29 22.9
 9 2 -1 65.59 18.1
 9 2 -1 62.39 16.3
 9 2 -1 60.99 17.2
 9 2 -1 66.09 15.6
 -9 -2 1 54.09 13.1
 -9 -2 1 77.29 16.6
 -9 -2 1 67.29 19.3
 -9 -2 1 81.59 18.8
 -9 -2 1 44.5 17.7
 -9 -2 1 75.19 18.6
 8 2 -1 29.3 12.2
 8 2 -1 43.2 13.8
 8 2 -1 18.7 12.1
 8 2 -1 47.2 13.6
 8 2 -1 14.5 11.7
 8 2 -1 29.9 15.3
 8 2 -1 21.1 17.6
 8 2 -1 36.1 14.2
 8 2 -1 22.2 13.6
 -8 -2 1 32.4 18.2
 -8 -2 1 28.4 10.1
 -8 -2 1 21.4 15
 -8 -2 1 30.7 15.2
 -8 -2 1 21.7 11.6
 -8 -2 1 20.1 12.3
 -8 -2 1 47.2 17.6
 -8 -2 1 56.89 13.5
 7 2 -1 35.5 11.2
 7 2 -1 39.8 12.9
 7 2 -1 45.9 12.3
 7 2 -1 48.9 10.8
 7 2 -1 67.29 16.5
 7 2 -1 18.3 11.7
 7 2 -1 62.59 12.3
 7 2 -1 19.1 10.6
 7 2 -1 32.3 12.6
 -7 -2 1 13.3 14.1
 -7 -2 1 52.59 13.8
 -7 -2 1 49.9 12.1
 -7 -2 1 15.6 13
 -7 -2 1 35.1 13.5
 -7 -2 1 44.3 11.5
 6 2 -1 87.59 15.2
 6 2 -1 70.69 17.3
 6 2 -1 90.49 11.7
 6 2 -1 74.69 16.1
 6 2 -1 83.59 12.8
 6 2 -1 66.99 12.5
 6 2 -1 68.39 11.3
 6 2 -1 102.59 16.2
 6 2 -1 84.19 12.3
 -6 -2 1 76.29 12.2
 -6 -2 1 94.39 15.5
 -6 -2 1 64.59 13.8
 -6 -2 1 70.69 12.3
 -6 -2 1 80.99 13.5
 -6 -2 1 70.19 11.2
 -6 -2 1 101.89 12.2
 -6 -2 1 108.79 14.9
 -6 -2 1 84.59 14.7
 5 2 -1 27.8 7.7
 5 2 -1 16 8.4
 5 2 -1 26.1 7.3
 5 2 -1 18.2 10.5
 5 2 -1 26.4 6.8
 5 2 -1 43.2 7.9
 5 2 -1 23.3 8.1
 5 2 -1 43.4 9.9
 -5 -2 1 27.2 10.1
 -5 -2 1 26.9 8.1
 -5 -2 1 40.4 9.7
 -5 -2 1 37.5 9
 -5 -2 1 16.9 8.7
 -5 -2 1 25.3 9
 -5 -2 1 29.1 6.6
 -5 -2 1 38 10.2
 -5 -2 1 37.3 6.9
 4 2 -1 377.16 27.3
 4 2 -1 397.16 27.6
 4 2 -1 373.06 27
 4 2 -1 350.26 25.5
 4 2 -1 413.36 28.2
 4 2 -1 346.77 26.7
 4 2 -1 359.56 27.1
 4 2 -1 378.16 28.2
 -4 -2 1 385.06 28.3
 -4 -2 1 399.26 28.7
 -4 -2 1 351.06 25.6
 -4 -2 1 372.86 26.4
 -4 -2 1 413.96 27.6
 -4 -2 1 356.26 27.4
 -4 -2 1 384.86 27.3
 -4 -2 1 376.16 27
 -4 -2 1 400.96 28.5
 3 2 -1 377.76 26.5
 3 2 -1 380.06 25.8
 3 2 -1 368.26 25.5
 3 2 -1 385.46 26.1
 3 2 -1 359.16 26
 3 2 -1 348.47 25.7
 3 2 -1 398.66 27.4
 3 2 -1 395.86 26.8
 3 2 -1 348.17 24.1
 -3 -2 1 348.77 25.6
 -3 -2 1 349.87 24.2
 -3 -2 1 373.66 26.4
 -3 -2 1 379.06 26.9
 -3 -2 1 344.07 25.3
 -3 -2 1 362.56 26
 -3 -2 1 368.06 26.6
 -3 -2 1 366.76 25.9
 -3 -2 1 395.66 26.2
 2 2 -1 326.77 22.1
 2 2 -1 283.87 20.9
 2 2 -1 279.37 20.6
 2 2 -1 297.57 21.7
 2 2 -1 313.37 21.2
 2 2 -1 325.97 21.3
 2 2 -1 308.27 21.5
 2 2 -1 297.97 21.1
 -2 -2 1 290.87 21.8
 -2 -2 1 277.97 21
 -2 -2 1 328.97 21.3
 -2 -2 1 342.17 22.1
 -2 -2 1 290.57 20.9
 -2 -2 1 325.87 21.3
 -2 -2 1 293.07 21
 1 2 -1 5535.95 363.06
 1 2 -1 6058.69 362.66
 1 2 -1 5344.57 362.96
 1 2 -1 5586.54 362.66
 1 2 -1 5891.11 362.56
 1 2 -1 5470.85 362.16
 1 2 -1 5495.15 362.66
 1 2 -1 5713.23 362.96
 1 2 -1 6243.08 362.96
 1 2 -1 6569.74 362.96
 -1 -2 1 5626.34 362.46
 -1 -2 1 5818.72 362.96
 -1 -2 1 5496.25 362.66
 -1 -2 1 6571.14 362.96
 -1 -2 1 5229.28 362.96
 -1 -2 1 6163.78 362.66
 -1 -2 1 5361.36 362.16
 -1 -2 1 5582.54 363.06
 -1 -2 1 6313.67 362.96
 -1 -2 1 5404.46 362.56
 0 2 -1 713.43 49.3
 0 2 -1 740.83 49.5
 0 2 -1 733.73 49.6
 0 2 -1 847.62 49
 0 2 -1 665.63 48.8
 0 2 -1 800.12 48.9
 0 -2 1 753.12 48.9
 0 -2 1 755.72 49.4
 0 -2 1 807.32 48.5
 0 -2 1 657.03 48.9
 0 -2 1 871.51 48.9
 0 -2 1 776.12 49.8
 0 -2 1 733.33 48.5
 0 -2 1 784.12 49.6
 0 -2 1 876.21 49
 -1 2 -1 402.16 29
 -1 2 -1 434.16 27.9
 -1 2 -1 435.86 28
 -1 2 -1 425.06 29.4
 1 -2 1 423.76 29.2
 1 -2 1 466.05 27.8
 1 -2 1 406.46 30.1
 1 -2 1 446.46 27.9
 -2 2 -1 980.3 66.39
 -2 2 -1 1044.3 68.59
 -2 2 -1 1008.9 67.59
 -2 2 -1 1087.99 67.19
 -2 2 -1 1027.2 66.39
 2 -2 1 1099.89 68.39
 2 -2 1 1077.99 67.09
 2 -2 1 1157.18 68.69
 2 -2 1 1063.49 66.59
 2 -2 1 1002.2 66.69
 2 -2 1 989.4 69.69
 -3 2 -1 355.06 24.8
 -3 2 -1 335.87 25.5
 -3 2 -1 366.96 27
 -3 2 -1 369.76 25.5
 -3 2 -1 354.66 29
 3 -2 1 383.06 26
 3 -2 1 365.36 23.6
 3 -2 1 362.16 27.4
 3 -2 1 371.76 25.2
 3 -2 1 373.76 24.3
 3 -2 1 331.87 25.1
 3 -2 1 383.96 24.3
 3 -2 1 366.56 27.1
 -4 2 -1 189.08 16.6
 -4 2 -1 221.88 20.7
 -4 2 -1 209.38 17
 -4 2 -1 220.78 17.4
 -4 2 -1 207.58 19
 4 -2 1 197.28 15.6
 4 -2 1 218.78 17.3
 4 -2 1 184.48 15.7
 4 -2 1 200.98 16.7
 4 -2 1 217.98 20.4
 4 -2 1 217.68 19.1
 4 -2 1 173.18 17.4
 -5 2 -1 17.6 7.3
 -5 2 -1 13.1 7.5
 -5 2 -1 11 9.6
 -5 2 -1 6 10.4
 -5 2 -1 15.3 8.6
 5 -2 1 11.4 7
 5 -2 1 9.4 7.3
 5 -2 1 11.3 7.5
 5 -2 1 10.2 5.3
 5 -2 1 14.3 9.5
 5 -2 1 22 9.6
 5 -2 1 0.6 11.2
 5 -2 1 20 6.5
 -6 2 -1 110.89 18.6
 -6 2 -1 113.39 15
 -6 2 -1 118.59 13.7
 -6 2 -1 120.59 16
 -6 2 -1 126.79 16.7
 -6 2 -1 153.88 20.4
 6 -2 1 155.78 21
 6 -2 1 125.89 14.4
 6 -2 1 117.89 16.4
 6 -2 1 120.49 17
 6 -2 1 139.79 14.1
 6 -2 1 108.39 15.1
 6 -2 1 129.59 18.9
 6 -2 1 125.39 16.7
 6 -2 1 105.99 12.9
 -7 2 -1 76.59 14.6
 -7 2 -1 79.29 18.3
 -7 2 -1 48 18.2
 -7 2 -1 76.69 11.7
 -7 2 -1 87.99 16.5
 -7 2 -1 49.8 13.3
 7 -2 1 63.59 13
 7 -2 1 64.69 13.7
 7 -2 1 28.1 18.2
 7 -2 1 73.99 17.8
 7 -2 1 78.39 13.3
 7 -2 1 53.29 10.9
 7 -2 1 64.09 15.3
 7 -2 1 55.29 16.3
 7 -2 1 61.09 11.6
 -8 2 -1 12.8 11.9
 -8 2 -1 7.9 20.3
 -8 2 -1 14.4 16.2
 -8 2 -1 -4.9 17.4
 -8 2 -1 -1.9 9.7
 -8 2 -1 1 13
 8 -2 1 28.7 18.2
 8 -2 1 -13.4 17.6
 8 -2 1 4 11.6
 8 -2 1 -1.6 18.5
 8 -2 1 -7.2 10.5
 8 -2 1 -23.6 13.4
 8 -2 1 -9.7 13
 8 -2 1 -2.9 11.9
 -9 2 -1 3.1 18.9
 -9 2 -1 1.5 15.4
 -9 2 -1 23.2 15.9
 9 -2 1 -5.4 14.6
 9 -2 1 11.1 14.7
 9 -2 1 -20 19
 9 -2 1 8.3 20.4
 9 -2 1 8.8 12.7
 9 -2 1 -19.9 16.8
 9 -2 1 10.6 13.7
 -10 2 -1 51.99 20.7
 -10 2 -1 100.59 23.3
 -10 2 -1 68.49 26.4
 10 -2 1 86.09 18.4
 10 -2 1 62.49 26.4
 10 -2 1 29.2 25.6
 10 -2 1 76.19 31.9
 10 -2 1 48.6 19.4
 10 -2 1 90.29 20.1
 -11 2 -1 -13.4 21.7
 -11 2 -1 -29.4 22.1
 -11 2 -1 -35.5 29
 11 -2 1 11.3 23.4
 11 -2 1 13.9 18.5
 11 -2 1 -26.8 27
 11 -2 1 81.89 34.5
 11 -2 1 -35.5 20
 -12 2 -1 44.3 28.9
 -12 2 -1 -34.7 45.7
 12 -2 1 50.99 27.3
 12 -2 1 21.8 62.79
 12 -2 1 53.69 29.2
 12 -2 1 56.99 22.7
 -13 2 -1 -50.19 31.4
 13 -2 1 26.2 30.7
 13 -2 1 -56.09 24.1
 13 -2 1 -62.49 34.6
 -14 2 -1 -11.6 39.4
 14 -2 1 -0.1 45.2
 14 -2 1 3.3 43.2
 -15 2 -1 -110.29 49.3
 15 -2 1 21.2 62.39
 15 -2 1 53.89 49
 15 -2 1 22 54.89
 16 1 -1 -13.3 52.39
 16 1 -1 -40.2 53.59
 16 1 -1 -137.79 57.79
 16 1 -1 -58.49 59.19
 -16 -1 1 -80.49 50.29
 15 1 -1 40.1 42.4
 15 1 -1 -24.1 50.29
 15 1 -1 -6.2 42.1
 15 1 -1 18.9 46.7
 -15 -1 1 -42.4 41
 14 1 -1 -31.8 38.4
 14 1 -1 -4.7 37.4
 14 1 -1 88.99 35.9
 14 1 -1 6 36.8
 -14 -1 1 46.7 24.4
 -14 -1 1 -18.3 32.7
 -14 -1 1 69.49 37.4
 13 1 -1 -44.6 36.6
 13 1 -1 -36.8 28.6
 13 1 -1 29.9 32.1
 13 1 -1 -43.7 27.8
 -13 -1 1 9.4 28.8
 -13 -1 1 -17.8 19.1
 -13 -1 1 38.3 31.4
 12 1 -1 10.5 25.4
 12 1 -1 14.1 26.3
 12 1 -1 75.29 44.3
 12 1 -1 22.6 25
 12 1 -1 18.4 26.7
 -12 -1 1 15.4 29.3
 -12 -1 1 33.9 17.6
 -12 -1 1 41.7 29.8
 -12 -1 1 -16.7 26.1
 -12 -1 1 30.8 26
 11 1 -1 1.8 20.6
 11 1 -1 31 20.1
 11 1 -1 25 21
 11 1 -1 45.9 35.6
 11 1 -1 -9.4 23
 -11 -1 1 45.2 23.3
 -11 -1 1 37.2 21.9
 -11 -1 1 4.3 25.6
 -11 -1 1 7.5 14.8
 -11 -1 1 1.7 23.5
 10 1 -1 -25.1 28.3
 10 1 -1 30.6 17.3
 10 1 -1 31.5 19.7
 10 1 -1 22.5 19.1
 10 1 -1 26.8 20.9
 10 1 -1 36.8 17.4
 -10 -1 1 -9.9 18.9
 -10 -1 1 10.5 25.4
 -10 -1 1 2.9 15.3
 -10 -1 1 22.6 12.6
 -10 -1 1 27.9 21.5
 9 1 -1 -11.4 12.9
 9 1 -1 -22.6 14.1
 9 1 -1 21.5 14.9
 9 1 -1 -1.1 15.3
 9 1 -1 17.4 16.3
 9 1 -1 0.5 21.7
 9 1 -1 19.2 17.3
 9 1 -1 -5.6 14
 -9 -1 1 -2 14.3
 -9 -1 1 -18.6 17.3
 -9 -1 1 20.5 14.4
 -9 -1 1 2.2 10.1
 -9 -1 1 1.8 16.5
 8 1 -1 68.29 17
 8 1 -1 62.69 20.2
 8 1 -1 36.7 14.1
 8 1 -1 73.59 16
 8 1 -1 59.89 14.5
 8 1 -1 74.69 14.8
 8 1 -1 53.79 13.2
 8 1 -1 45.3 13.1
 8 1 -1 50.29 13.4
 -8 -1 1 53.19 14.2
 -8 -1 1 41.6 20.5
 -8 -1 1 79.49 19.5
 -8 -1 1 59.49 14.8
 -8 -1 1 40.3 14.4
 -8 -1 1 82.29 16.7
 -8 -1 1 68.19 11.6
 -8 -1 1 51.19 16.4
 7 1 -1 33.3 11.4
 7 1 -1 32.6 10.1
 7 1 -1 16.1 14.1
 7 1 -1 34.8 12.3
 7 1 -1 31.7 15.6
 7 1 -1 18.2 11.3
 7 1 -1 28.4 11.1
 7 1 -1 24.2 11.2
 7 1 -1 21.1 10.1
 -7 -1 1 34.7 13.1
 -7 -1 1 42.3 12.8
 -7 -1 1 10.5 10.7
 -7 -1 1 28.4 10.6
 -7 -1 1 23.4 15
 -7 -1 1 28.7 14.6
 -7 -1 1 27.6 10.1
 6 1 -1 168.18 18.4
 6 1 -1 163.78 22.5
 6 1 -1 160.38 19.1
 6 1 -1 159.58 20.8
 6 1 -1 186.28 19.5
 6 1 -1 189.38 18.1
 6 1 -1 148.19 17
 6 1 -1 183.18 19.6
 6 1 -1 179.88 17.6
 -6 -1 1 177.58 18.9
 -6 -1 1 160.68 22.3
 -6 -1 1 173.68 20.3
 -6 -1 1 175.18 19.4
 -6 -1 1 181.88 20.7
 -6 -1 1 176.98 18.6
 -6 -1 1 189.18 17.3
 5 1 -1 320.07 25.5
 5 1 -1 327.47 24.9
 5 1 -1 336.77 27.6
 5 1 -1 378.26 26.7
 5 1 -1 319.27 24.7
 5 1 -1 336.37 25.2
 5 1 -1 359.46 26
 5 1 -1 327.97 26.1
 -5 -1 1 357.66 26.8
 -5 -1 1 336.97 27
 -5 -1 1 353.76 26.1
 -5 -1 1 309.67 24.7
 -5 -1 1 330.77 24.2
 -5 -1 1 301.37 27.8
 -5 -1 1 307.47 27.1
 4 1 -1 327.47 22.9
 4 1 -1 302.97 24.7
 4 1 -1 326.27 23.7
 4 1 -1 310.57 23.1
 4 1 -1 284.97 24.4
 4 1 -1 330.67 24
 4 1 -1 305.87 22.2
 4 1 -1 310.77 23.5
 4 1 -1 334.57 22.7
 -4 -1 1 309.77 23.3
 -4 -1 1 299.37 24.6
 -4 -1 1 294.37 22.9
 -4 -1 1 317.37 22.2
 -4 -1 1 310.87 23.7
 -4 -1 1 308.87 24.5
 -4 -1 1 301.27 22.4
 -4 -1 1 322.77 24.2
 -4 -1 1 288.47 23.7
 3 1 -1 826.12 52.89
 3 1 -1 827.52 54.19
 3 1 -1 865.81 56.29
 3 1 -1 842.62 53.99
 3 1 -1 800.22 53.69
 3 1 -1 856.61 53.49
 3 1 -1 819.62 53.89
 3 1 -1 783.72 53.39
 3 1 -1 790.52 54.39
 -3 -1 1 795.92 52.99
 -3 -1 1 799.12 53.89
 -3 -1 1 801.62 53.19
 -3 -1 1 844.42 54.09
 -3 -1 1 851.41 54.49
 -3 -1 1 757.32 53.39
 -3 -1 1 828.82 53.89
 -3 -1 1 820.92 54.39
 -3 -1 1 863.91 54.79
 2 1 -1 492.85 32.3
 2 1 -1 502.75 33.1
 2 1 -1 496.95 33.3
 2 1 -1 580.84 34.2
 2 1 -1 519.95 33.6
 2 1 -1 483.65 33.6
 2 1 -1 511.85 33.4
 2 1 -1 499.05 33.5
 -2 -1 1 463.05 32.9
 -2 -1 1 506.25 33.6
 -2 -1 1 512.65 32.4
 -2 -1 1 502.15 33
 -2 -1 1 483.35 33.9
 -2 -1 1 474.45 34
 -2 -1 1 516.65 33.4
 1 1 -1 363.66 22.7
 1 1 -1 348.17 22
 1 1 -1 277.47 21.9
 -1 -1 1 351.66 22.2
 -1 -1 1 360.06 22.3
 -1 -1 1 340.07 22
 -1 -1 1 314.77 22
 0 -1 1 234.68 15.2
 -1 1 -1 1939.31 122.29
 -1 1 -1 1946.41 122.19
 -1 1 -1 1965.5 121.69
 -1 1 -1 1864.01 122.49
 -1 1 -1 1821.42 122.69
 1 -1 1 1725.03 121.69
 1 -1 1 1884.91 122.29
 1 -1 1 1858.41 122.59
 1 -1 1 2087.19 122.39
 1 -1 1 1984.2 122.09
 1 -1 1 2221.68 121.59
 1 -1 1 1922.21 122.49
 -2 1 -1 30.4 5.2
 -2 1 -1 30.4 4.6
 -2 1 -1 17.5 5.8
 -2 1 -1 31.2 4.2
 -2 1 -1 22.8 5.4
 2 -1 1 28 5.1
 2 -1 1 25.3 3.4
 2 -1 1 33.9 4.1
 2 -1 1 23.7 3.5
 2 -1 1 25 3.1
 2 -1 1 29.4 4.3
 2 -1 1 20.7 4
 2 -1 1 20.8 4.8
 2 -1 1 27.4 5.9
 -3 1 -1 2324.07 131.89
 -3 1 -1 2067.79 132.89
 -3 1 -1 2053.19 132.39
 -3 1 -1 2027.1 133.09
 -3 1 -1 2005 131.99
 -3 1 -1 1999.6 130.89
 -3 1 -1 2170.58 131.19
 3 -1 1 2048.59 132.99
 3 -1 1 2171.38 131.69
 3 -1 1 2126.39 132.29
 3 -1 1 2099.89 133.19
 3 -1 1 1993.3 131.29
 3 -1 1 2053.29 131.09
 3 -1 1 2032.4 131.99
 3 -1 1 2030.2 132.99
 3 -1 1 2042.3 131.59
 -4 1 -1 455.95 28.3
 -4 1 -1 408.26 30.1
 -4 1 -1 410.46 27.9
 -4 1 -1 349.87 27.6
 -4 1 -1 389.96 26.2
 -4 1 -1 410.56 26.9
 -4 1 -1 407.36 28.6
 -4 1 -1 359.26 29
 4 -1 1 378.06 26.9
 4 -1 1 387.16 28.1
 4 -1 1 370.86 29.1
 4 -1 1 383.76 28.5
 4 -1 1 409.06 28
 4 -1 1 410.46 27.6
 4 -1 1 393.96 27.4
 4 -1 1 407.76 26.4
 4 -1 1 393.96 29.9
 -5 1 -1 95.89 12.2
 -5 1 -1 84.89 9.1
 -5 1 -1 105.89 12.3
 -5 1 -1 116.09 15.1
 -5 1 -1 120.99 15.3
 -5 1 -1 111.09 13.4
 5 -1 1 94.29 12.3
 5 -1 1 100.29 13.1
 5 -1 1 83.79 11.2
 5 -1 1 103.09 12
 5 -1 1 107.09 14.7
 5 -1 1 108.59 13.5
 5 -1 1 93.89 14.6
 -6 1 -1 3.6 5.3
 -6 1 -1 0.2 8.6
 -6 1 -1 1.7 9.8
 -6 1 -1 -6.2 7.6
 -6 1 -1 24.7 11
 -6 1 -1 10.4 7.7
 -6 1 -1 8.5 11.6
 -6 1 -1 2.2 9
 6 -1 1 10.2 7.4
 6 -1 1 16.6 9.1
 6 -1 1 20.6 10.8
 6 -1 1 4.2 7.1
 6 -1 1 16.1 13.5
 6 -1 1 -6.3 10.7
 6 -1 1 10.5 8.5
 6 -1 1 4.1 6.5
 6 -1 1 -4.2 7.8
 -7 1 -1 47.7 12.1
 -7 1 -1 37.5 11.9
 -7 1 -1 48 14.5
 -7 1 -1 29.7 15
 -7 1 -1 30.8 12.2
 -7 1 -1 34.3 7.7
 -7 1 -1 46.3 14.6
 -7 1 -1 19.9 9.6
 7 -1 1 42.5 11.6
 7 -1 1 35.5 9.7
 7 -1 1 38.9 12.2
 7 -1 1 28.6 13.2
 7 -1 1 36.3 9.7
 7 -1 1 43 15.7
 7 -1 1 21.4 10
 7 -1 1 17.7 11.1
 -8 1 -1 11 12.7
 -8 1 -1 33.4 16.1
 -8 1 -1 14.2 7.8
 -8 1 -1 11.2 16.7
 -8 1 -1 -8.2 9.4
 -8 1 -1 7 12.4
 -8 1 -1 9.7 19.5
 8 -1 1 24.3 16.2
 8 -1 1 -9.8 14.9
 8 -1 1 -7.2 16.7
 8 -1 1 -11.2 9.6
 8 -1 1 -12.3 10.1
 8 -1 1 4.2 11.8
 8 -1 1 8 13.1
 8 -1 1 -1.9 10.8
 8 -1 1 20.7 12
 -9 1 -1 22.2 9.4
 -9 1 -1 0.6 13.8
 -9 1 -1 -1.3 15.5
 -9 1 -1 18.1 17
 -9 1 -1 26.6 19.3
 9 -1 1 11.1 13.7
 9 -1 1 9.2 19
 9 -1 1 -1.9 17.2
 9 -1 1 43 14.2
 9 -1 1 -11.7 15.1
 9 -1 1 16.5 23.1
 9 -1 1 37.3 14.1
 9 -1 1 13.5 17.6
 -10 1 -1 -0.9 17.4
 -10 1 -1 3.7 19.2
 -10 1 -1 5 18
 -10 1 -1 -6.8 21.3
 -10 1 -1 21.4 11.2
 10 -1 1 18.6 15.6
 10 -1 1 32.9 37.8
 10 -1 1 -31.5 20.5
 10 -1 1 -10.3 14.9
 10 -1 1 10 16.9
 10 -1 1 3.2 18.9
 -11 1 -1 4.7 28.1
 -11 1 -1 59.19 13.4
 -11 1 -1 7.5 27.2
 -11 1 -1 46.2 24.2
 11 -1 1 49.9 28.4
 11 -1 1 45.8 19.2
 11 -1 1 54.59 21.9
 11 -1 1 93.09 35.3
 11 -1 1 26.2 22.8
 -12 1 -1 -3 26.9
 -12 1 -1 34.4 28.3
 12 -1 1 3.9 60.39
 12 -1 1 -20.1 27.8
 12 -1 1 -0.9 21.2
 12 -1 1 20.7 25.8
 12 -1 1 -15.8 32.9
 -13 1 -1 6.8 32.4
 -13 1 -1 17.6 31.7
 13 -1 1 -14.1 27.8
 13 -1 1 -21.2 29.5
 13 -1 1 -28.4 36.7
 -14 1 -1 -4.6 35.8
 14 -1 1 53.79 46.4
 14 -1 1 0.9 29.6
 14 -1 1 -97.79 56.79
 14 -1 1 48 45.7
 -15 1 -1 -40.9 46.4
 15 -1 1 -27 43.8
 15 -1 1 -19.4 51.19
 15 -1 1 15.6 55.29
 16 0 -1 -87.79 52.59
 16 0 -1 -61.79 65.09
 16 0 -1 15.2 60.79
 -16 0 1 -22.3 54.69
 15 0 -1 57.29 55.69
 15 0 -1 -80.19 47.7
 15 0 -1 -38.6 43.7
 15 0 -1 -34 40.4
 -15 0 1 -40.8 43.6
 14 0 -1 73.29 36.4
 14 0 -1 73.89 50.69
 14 0 -1 -58.49 43.5
 14 0 -1 36.5 37.4
 -14 0 1 -3 34.1
 -14 0 1 68.49 39.1
 13 0 -1 12.9 29.6
 13 0 -1 23.5 37.9
 13 0 -1 96.29 32.6
 13 0 -1 27.7 32.9
 -13 0 1 40.2 33.6
 -13 0 1 20.7 40
 -13 0 1 -4.8 19.5
 -13 0 1 55.69 32.3
 12 0 -1 134.49 28.2
 12 0 -1 88.09 46.3
 12 0 -1 131.69 37.8
 12 0 -1 104.19 30.8
 12 0 -1 123.69 29.9
 -12 0 1 84.89 31.9
 -12 0 1 119.59 21.1
 -12 0 1 170.18 32.3
 -12 0 1 148.59 32.7
 -12 0 1 172.18 36.7
 11 0 -1 34.9 22.1
 11 0 -1 17.2 36.5
 11 0 -1 -10.2 19.2
 11 0 -1 2.7 25.1
 11 0 -1 32.9 26.8
 -11 0 1 -9.7 13.5
 -11 0 1 3.5 22.9
 -11 0 1 43.4 28.3
 -11 0 1 17.9 26
 -11 0 1 6.4 20.3
 10 0 -1 383.66 37.6
 10 0 -1 401.26 46.6
 10 0 -1 412.46 38.9
 10 0 -1 367.96 39.2
 10 0 -1 465.75 51.49
 -10 0 1 401.86 32.4
 -10 0 1 376.46 42
 -10 0 1 338.07 42.3
 -10 0 1 365.06 40.6
 -10 0 1 380.36 39.7
 9 0 -1 -12.2 14.7
 9 0 -1 -5.1 15.1
 9 0 -1 27.2 19.2
 9 0 -1 27.8 24.3
 9 0 -1 -23.9 15.8
 9 0 -1 0.4 14.2
 9 0 -1 -10.5 18.4
 9 0 -1 16.7 16.3
 -9 0 1 -20.5 15.2
 -9 0 1 2.3 13.9
 -9 0 1 2.5 16.3
 -9 0 1 3.9 17.1
 -9 0 1 5.3 10.5
 8 0 -1 124.29 18.9
 8 0 -1 119.29 19.6
 8 0 -1 117.59 17.6
 8 0 -1 107.49 24.8
 8 0 -1 92.99 21.3
 8 0 -1 153.98 19.2
 8 0 -1 76.89 16.3
 8 0 -1 87.59 17.7
 8 0 -1 145.09 20.1
 -8 0 1 104.49 19
 -8 0 1 121.49 15.2
 -8 0 1 109.49 18
 -8 0 1 117.79 23.4
 -8 0 1 88.69 21.3
 -8 0 1 156.78 21
 -8 0 1 131.79 20.3
 7 0 -1 13.4 10.8
 7 0 -1 11.2 8.9
 7 0 -1 8.7 14.3
 7 0 -1 11.2 10.6
 7 0 -1 5.7 16.4
 7 0 -1 -6.6 10.6
 7 0 -1 6.9 9.9
 7 0 -1 21.3 10.2
 7 0 -1 15.5 11.7
 -7 0 1 4.7 14.1
 -7 0 1 -3 12.2
 -7 0 1 12.4 12.1
 -7 0 1 19.6 10.5
 -7 0 1 -7.5 10.5
 -7 0 1 34.2 15.6
 -7 0 1 -1.3 7.1
 6 0 -1 22.5 15
 6 0 -1 29.8 9.4
 6 0 -1 64.39 15.5
 6 0 -1 13.9 10.9
 6 0 -1 55.49 11.4
 6 0 -1 44.1 10.4
 6 0 -1 55.89 10.4
 6 0 -1 25 10.7
 -6 0 1 23.5 12.1
 -6 0 1 24.1 11.5
 -6 0 1 54.79 14
 -6 0 1 49.1 10.7
 -6 0 1 46 12.7
 -6 0 1 61.29 11.7
 -6 0 1 64.79 12.2
 5 0 -1 383.66 28.9
 5 0 -1 402.46 29.5
 5 0 -1 382.96 29.7
 5 0 -1 376.56 29.4
 5 0 -1 439.96 30.2
 5 0 -1 406.36 32.6
 5 0 -1 396.06 29.4
 5 0 -1 398.56 31.9
 5 0 -1 415.36 28.5
 -5 0 1 398.66 27.8
 -5 0 1 421.86 31.2
 -5 0 1 414.76 30.9
 -5 0 1 405.66 30.3
 -5 0 1 388.16 30.1
 -5 0 1 359.36 29
 -5 0 1 363.96 31.9
 -5 0 1 375.06 29.5
 4 0 -1 17.6 5.3
 4 0 -1 1 5.4
 4 0 -1 -0.4 5.7
 4 0 -1 -11.5 8.7
 4 0 -1 -11.3 5.3
 4 0 -1 -5.5 7.5
 4 0 -1 4.1 6.3
 4 0 -1 9.5 5.7
 -4 0 1 4.5 5.1
 -4 0 1 1.6 6.8
 -4 0 1 3.4 4.6
 -4 0 1 0.8 7.1
 -4 0 1 -0.6 7.2
 -4 0 1 3.8 5.4
 -4 0 1 8.4 6.7
 -4 0 1 4 4.1
 3 0 -1 2692.93 173.58
 3 0 -1 2832.52 173.08
 3 0 -1 2812.12 172.68
 3 0 -1 2841.72 172.38
 3 0 -1 2767.22 173.18
 3 0 -1 2513.95 173.28
 3 0 -1 2634.14 172.88
 3 0 -1 2724.83 172.28
 -3 0 1 2573.04 172.28
 -3 0 1 2776.22 172.98
 -3 0 1 2649.63 172.68
 -3 0 1 3137.49 172.38
 -3 0 1 2452.65 171.88
 -3 0 1 2878.81 173.58
 -3 0 1 2545.45 173.28
 -3 0 1 2662.83 172.78
 -3 0 1 2785.12 173.58
 2 0 -1 18.2 3.4
 2 0 -1 19.3 5.3
 2 0 -1 12 5
 2 0 -1 12.3 4
 2 0 -1 17.3 5
 2 0 -1 17 3.8
 2 0 -1 19.9 3.5
 2 0 -1 18.8 4.5
 -2 0 1 19.8 3.6
 -2 0 1 14.1 4.3
 -2 0 1 19.7 3.9
 -2 0 1 11 5
 -2 0 1 21.8 3.7
 -2 0 1 16.9 4.1
 -2 0 1 12.4 3.6
 1 0 -1 6940.41 526.35
 1 0 -1 8192.58 526.35
 1 0 -1 8156.48 526.85
 -1 0 1 8565.94 526.25
 -1 0 1 9069.19 526.35
 -1 0 1 8721.13 526.35
 -1 0 1 8874.51 527.15
 -1 0 1 8559.54 526.55
 -1 0 -1 6155.78 406.16
 -1 0 -1 6497.85 406.26
 -1 0 -1 6105.89 405.96
 -1 0 -1 7476.05 405.56
 -1 0 -1 5956.3 405.96
 -1 0 -1 5479.05 405.66
 1 0 1 7100.99 405.96
 1 0 1 6604.44 405.56
 1 0 1 6218.08 405.86
 1 0 1 6375.76 406.16
 1 0 1 7161.08 405.76
 -2 0 -1 21.9 2.9
 -2 0 -1 17.7 3
 -2 0 -1 16 3.5
 -2 0 -1 20.3 4.1
 -2 0 -1 22.3 3.8
 -2 0 -1 15.4 3
 -2 0 -1 12.5 3.9
 -2 0 -1 20.7 4.2
 -2 0 -1 18.1 3.8
 2 0 1 17.6 3.7
 2 0 1 20.2 3
 2 0 1 15.5 4.7
 2 0 1 16.1 3.3
 2 0 1 20.2 3.8
 2 0 1 21.1 3.8
 2 0 1 21.9 2.9
 2 0 1 17.5 4.2
 -3 0 -1 2384.86 157.08
 -3 0 -1 2340.37 156.78
 -3 0 -1 2438.06 157.88
 -3 0 -1 2389.26 158.08
 -3 0 -1 2349.36 157.28
 -3 0 -1 2517.15 158.18
 -3 0 -1 2440.26 156.88
 -3 0 -1 2628.64 157.58
 -3 0 -1 2813.72 157.58
 3 0 1 2598.24 157.48
 3 0 1 2513.25 157.78
 3 0 1 2469.95 158.08
 3 0 1 2469.85 157.98
 3 0 1 2352.36 156.68
 3 0 1 2612.94 157.68
 3 0 1 2427.16 157.08
 -4 0 -1 5 5.6
 -4 0 -1 5.9 3.9
 -4 0 -1 4.3 7.3
 -4 0 -1 4.4 5.2
 -4 0 -1 3.3 5.3
 -4 0 -1 14.2 5.8
 -4 0 -1 6.7 5.2
 -4 0 -1 4.1 5
 -4 0 -1 10.4 5.3
 4 0 1 8.2 4.4
 4 0 1 -0.2 5.3
 4 0 1 -8.6 6.4
 4 0 1 3.2 4.9
 4 0 1 -4.6 5.8
 4 0 1 8.1 6.1
 4 0 1 -0.1 4.5
 4 0 1 2.9 3.4
 4 0 1 8.8 4.8
 -5 0 -1 344.67 26.7
 -5 0 -1 378.26 29.5
 -5 0 -1 367.86 27.7
 -5 0 -1 370.76 27.9
 -5 0 -1 361.86 25.5
 -5 0 -1 384.56 27
 5 0 1 361.56 26.8
 5 0 1 400.36 27.5
 5 0 1 343.87 25.9
 5 0 1 355.66 32.4
 5 0 1 382.46 30
 5 0 1 355.16 27.9
 5 0 1 381.46 27.9
 -6 0 -1 38.4 11.8
 -6 0 -1 23.7 9.6
 -6 0 -1 42.2 10.8
 -6 0 -1 32 13.2
 -6 0 -1 47.4 11.5
 -6 0 -1 43.7 9.4
 -6 0 -1 46.7 10.3
 -6 0 -1 58.59 8.2
 6 0 1 53.19 11.1
 6 0 1 48.9 11.1
 6 0 1 51.09 14
 6 0 1 45.5 11.4
 6 0 1 64.09 13
 6 0 1 40.4 8.7
 6 0 1 53.29 9
 6 0 1 46 9.4
 -7 0 -1 -20 13.7
 -7 0 -1 10.1 11.5
 -7 0 -1 0.2 10.4
 -7 0 -1 8 9.1
 -7 0 -1 13 10.8
 -7 0 -1 -7.1 11.4
 -7 0 -1 9 6.5
 -7 0 -1 14 10.3
 7 0 1 -9.6 7.3
 7 0 1 -14.7 9
 7 0 1 -2.7 7.4
 7 0 1 21.7 11.1
 7 0 1 13.7 13.7
 7 0 1 6.2 11.2
 7 0 1 -3 9.7
 7 0 1 -2.3 12.3
 7 0 1 -6 9.3
 -8 0 -1 117.99 20.3
 -8 0 -1 140.99 20.1
 -8 0 -1 121.49 15.1
 -8 0 -1 121.29 17.7
 -8 0 -1 122.49 17.7
 -8 0 -1 85.79 21.3
 -8 0 -1 98.19 20.2
 8 0 1 121.29 18
 8 0 1 106.99 16.5
 8 0 1 100.39 18.9
 8 0 1 147.59 20.2
 8 0 1 101.79 17.9
 8 0 1 116.79 16.9
 8 0 1 82.79 16.5
 8 0 1 99.89 15.2
 -9 0 -1 -4.7 13.2
 -9 0 -1 2.3 11.5
 -9 0 -1 -8.7 9.9
 -9 0 -1 -24.3 15.5
 -9 0 -1 -10.4 13.7
 -9 0 -1 14.7 15.5
 9 0 1 -21.7 14.7
 9 0 1 0.8 18.9
 9 0 1 8.2 17.3
 9 0 1 29.1 18
 9 0 1 -20.8 12.2
 9 0 1 -11.9 13.3
 9 0 1 9 16.5
 9 0 1 19.9 21.1
 9 0 1 -7.7 11.7
 -10 0 -1 366.46 39.1
 -10 0 -1 426.36 37.1
 -10 0 -1 342.17 41.3
 -10 0 -1 371.06 30.7
 -10 0 -1 370.16 37.3
 10 0 1 330.77 44.8
 10 0 1 334.97 36.3
 10 0 1 346.37 44.1
 10 0 1 380.86 39.2
 10 0 1 378.16 40.5
 10 0 1 344.47 34.5
 -11 0 -1 -6.1 22.2
 -11 0 -1 -19.2 19.9
 -11 0 -1 28.9 15.8
 -11 0 -1 -10.5 20.5
 11 0 1 -16.3 22
 11 0 1 -3.2 17.4
 11 0 1 -2.8 32.3
 11 0 1 14.8 20.4
 11 0 1 15.5 23.1
 -12 0 -1 138.19 30.4
 -12 0 -1 133.19 30.3
 -12 0 -1 110.59 20.9
 -12 0 -1 145.29 27.9
 12 0 1 152.88 37.9
 12 0 1 87.29 41.3
 12 0 1 128.79 29
 12 0 1 126.89 31.1
 12 0 1 66.69 24
 -13 0 -1 -27 28.2
 -13 0 -1 -10 22.5
 -13 0 -1 -8.1 31.9
 13 0 1 9.1 28.8
 13 0 1 47.5 33.4
 13 0 1 3 24.1
 -14 0 -1 12.3 35.9
 14 0 1 26.8 37.8
 14 0 1 48.2 29.9
 14 0 1 -11.6 40.6
 14 0 1 9.8 41.2
 -15 0 -1 -46.5 42
 15 0 1 93.19 53.29
 15 0 1 -55.69 36
 15 0 1 37.6 44.5
 15 0 1 -47.2 42.8
 -16 0 -1 -50.09 54.69
 16 0 1 30.9 63.79
 16 0 1 -78.39 58.49
 16 0 1 -59.09 51.59
 15 -1 -1 42.3 43
 15 -1 -1 -32.1 49.99
 15 -1 -1 -11.8 63.79
 15 -1 -1 -15.7 55.29
 -15 1 1 4.6 48.2
 14 -1 -1 78.29 58.89
 14 -1 -1 -2.7 41.6
 14 -1 -1 73.69 36.8
 14 -1 -1 -29.5 41.9
 -14 1 1 -29.7 36
 -14 1 1 56.59 51.29
 13 -1 -1 4.9 32.2
 13 -1 -1 -39.3 29.4
 13 -1 -1 32.3 33.3
 13 -1 -1 -9.6 35.1
 -13 1 1 -4.5 70.69
 -13 1 1 -34.9 33.3
 -13 1 1 -8 30.9
 12 -1 -1 14.7 26.6
 12 -1 -1 21.3 58.49
 12 -1 -1 -14.1 26.4
 12 -1 -1 -28.7 50.29
 12 -1 -1 27.7 23.9
 -12 1 1 5.7 29
 -12 1 1 -8.7 25.7
 -12 1 1 13 16.3
 -12 1 1 53.79 34
 11 -1 -1 58.09 23.3
 11 -1 -1 55.99 23.3
 11 -1 -1 24.3 29.4
 11 -1 -1 34.4 38
 11 -1 -1 80.09 23.5
 -11 1 1 46.8 14.8
 -11 1 1 11.5 25.3
 -11 1 1 62.49 23.6
 -11 1 1 38.5 23.1
 -11 1 1 30.1 27.4
 10 -1 -1 -8 18.9
 10 -1 -1 -22.3 30.1
 10 -1 -1 16.9 18.1
 10 -1 -1 -51.59 21.2
 10 -1 -1 3.7 31.5
 10 -1 -1 18.3 17.6
 -10 1 1 -11.1 18.7
 -10 1 1 20.7 19.5
 -10 1 1 4.9 11.3
 -10 1 1 9.4 17.5
 -10 1 1 15.5 21.3
 9 -1 -1 -4 14.7
 9 -1 -1 5.7 16.6
 9 -1 -1 -3.9 21
 9 -1 -1 12.8 15.2
 9 -1 -1 -14.9 18.8
 9 -1 -1 19 15.9
 9 -1 -1 -5.7 14.8
 9 -1 -1 30.1 25.7
 -9 1 1 28.2 17.5
 -9 1 1 23.9 11
 -9 1 1 3.9 14.3
 -9 1 1 2.3 17.6
 -9 1 1 11.3 17.8
 8 -1 -1 13.5 12.6
 8 -1 -1 -2.1 13.3
 8 -1 -1 8.2 24.4
 8 -1 -1 4.8 13.6
 8 -1 -1 13.1 12.5
 8 -1 -1 -14.2 14.1
 8 -1 -1 19 16.7
 8 -1 -1 3.5 13.2
 8 -1 -1 23.8 15.7
 -8 1 1 -28.6 19.3
 -8 1 1 8.9 12.9
 -8 1 1 -6.3 13.4
 -8 1 1 -1.8 15.2
 -8 1 1 33.9 15.1
 -8 1 1 -13.8 19.3
 7 -1 -1 9.4 17.3
 7 -1 -1 51.39 13.6
 7 -1 -1 25.5 11
 7 -1 -1 44.8 13.1
 7 -1 -1 31.1 13.3
 7 -1 -1 15.2 10.6
 7 -1 -1 12.5 12.3
 7 -1 -1 17.3 15.9
 7 -1 -1 31.5 12.6
 -7 1 1 54.99 12.7
 -7 1 1 38.7 13.6
 -7 1 1 -6.1 15.7
 -7 1 1 8.3 12.8
 -7 1 1 32.3 13.7
 -7 1 1 47.8 8.2
 -7 1 1 3.5 14.4
 6 -1 -1 -2.2 9.3
 6 -1 -1 20.4 8.7
 6 -1 -1 7.9 9.1
 6 -1 -1 34.9 10.8
 6 -1 -1 39 14.4
 6 -1 -1 -2.6 11.7
 6 -1 -1 1.2 7.8
 6 -1 -1 -1.8 9.4
 -6 1 1 9 10.9
 -6 1 1 -10.4 12.3
 -6 1 1 8.1 5.8
 -6 1 1 4.7 10.6
 -6 1 1 17.1 13.3
 -6 1 1 -3.8 8.5
 -6 1 1 14.2 11.1
 5 -1 -1 102.19 14
 5 -1 -1 107.29 12.1
 5 -1 -1 99.59 13.5
 5 -1 -1 105.99 12.8
 5 -1 -1 112.49 15.3
 5 -1 -1 109.69 17.5
 5 -1 -1 106.19 14.4
 -5 1 1 121.59 20.5
 -5 1 1 93.79 13.6
 -5 1 1 94.09 15.3
 -5 1 1 108.39 15
 -5 1 1 104.59 14.5
 -5 1 1 91.09 14.9
 4 -1 -1 403.76 30.3
 4 -1 -1 441.86 31
 4 -1 -1 444.96 32.3
 4 -1 -1 428.26 31.3
 4 -1 -1 453.95 31
 4 -1 -1 444.96 30.6
 4 -1 -1 420.36 32.5
 -4 1 1 435.76 30.4
 -4 1 1 407.36 30.7
 -4 1 1 439.16 30.4
 -4 1 1 427.46 31.5
 -4 1 1 419.76 28.5
 -4 1 1 419.96 31.7
 -4 1 1 392.46 32.2
 -4 1 1 378.66 29.7
 3 -1 -1 2323.67 143.29
 3 -1 -1 2281.87 144.29
 3 -1 -1 2484.75 143.39
 3 -1 -1 2150.88 143.29
 3 -1 -1 2138.79 144.89
 3 -1 -1 2253.27 144.79
 3 -1 -1 2419.66 144.29
 3 -1 -1 2242.28 144.09
 -3 1 1 2203.58 144.89
 -3 1 1 2365.46 142.99
 -3 1 1 2141.19 142.89
 -3 1 1 2274.07 143.99
 -3 1 1 2252.57 144.69
 -3 1 1 2235.88 144.39
 -3 1 1 2133.69 143.39
 2 -1 -1 37.7 4.8
 2 -1 -1 32.8 5.9
 2 -1 -1 29 4.6
 2 -1 -1 24.8 6.2
 2 -1 -1 31.4 5.4
 2 -1 -1 34.3 6.5
 2 -1 -1 36.5 7
 -2 1 1 23 6.6
 -2 1 1 22.9 6.1
 -2 1 1 29.9 5.2
 -2 1 1 32.2 5.2
 -2 1 1 33.3 4.4
 -2 1 1 33.3 5.4
 -2 1 1 27.6 4.3
 -2 1 1 34.3 6.9
 -2 1 1 28.9 5.5
 1 -1 -1 2318.87 144.09
 1 -1 -1 2194.68 145.19
 1 -1 -1 2347.97 144.79
 1 -1 -1 2441.96 145.59
 1 -1 -1 2299.67 144.89
 1 -1 -1 2299.17 145.39
 1 -1 -1 2058.29 144.69
 1 -1 -1 2273.57 144.59
 1 -1 -1 2188.58 144.79
 -1 1 1 2099.39 144.69
 -1 1 1 2286.97 144.89
 -1 1 1 2177.38 144.69
 -1 1 1 2354.96 145.49
 -1 1 1 2209.28 144.49
 -1 1 1 2592.84 144.19
 -1 1 1 2461.35 144.79
 -1 1 1 2368.46 145.49
 -1 -1 -1 407.16 25.7
 -1 -1 -1 328.47 25.3
 1 1 1 371.06 25.3
 1 1 1 379.26 25.4
 1 1 1 444.86 26
 1 1 1 388.26 25.6
 1 1 1 413.56 25.4
 -2 -1 -1 509.85 31.7
 -2 -1 -1 470.85 32
 -2 -1 -1 445.56 31.4
 -2 -1 -1 507.95 32
 -2 -1 -1 518.15 32.1
 -2 -1 -1 430.66 31.1
 -2 -1 -1 501.35 31.4
 2 1 1 479.35 32
 2 1 1 505.45 32.1
 2 1 1 508.55 31.7
 2 1 1 447.96 31.4
 2 1 1 449.76 31
 2 1 1 527.55 32.1
 2 1 1 473.25 31.4
 -3 -1 -1 768.22 50.39
 -3 -1 -1 806.22 50.89
 -3 -1 -1 795.02 51.39
 -3 -1 -1 845.52 50.89
 -3 -1 -1 723.53 50.89
 -3 -1 -1 720.43 50.09
 3 1 1 778.52 50.79
 3 1 1 763.92 49.99
 3 1 1 744.73 49.99
 3 1 1 787.52 50.99
 3 1 1 768.22 51.09
 3 1 1 744.03 50.69
 3 1 1 776.32 50.79
 3 1 1 812.22 50.99
 3 1 1 785.52 50.49
 -4 -1 -1 283.87 22.6
 -4 -1 -1 307.57 23.9
 -4 -1 -1 310.87 21.4
 -4 -1 -1 319.87 22.5
 -4 -1 -1 309.07 21.9
 -4 -1 -1 279.17 20.9
 -4 -1 -1 333.27 22.6
 4 1 1 320.57 24
 4 1 1 299.07 22.5
 4 1 1 288.27 21.6
 4 1 1 281.87 21.2
 4 1 1 277.67 23.2
 4 1 1 299.57 22.1
 4 1 1 287.97 23.9
 4 1 1 281.77 22.2
 -5 -1 -1 312.97 26.5
 -5 -1 -1 310.57 22.6
 -5 -1 -1 319.17 24.6
 -5 -1 -1 357.96 24.7
 -5 -1 -1 273.77 24.6
 -5 -1 -1 302.27 26.4
 -5 -1 -1 321.67 23.9
 5 1 1 344.47 25.9
 5 1 1 311.77 23.8
 5 1 1 302.37 25.7
 5 1 1 307.37 24.1
 5 1 1 320.17 24.5
 5 1 1 292.77 24.1
 5 1 1 313.07 22.9
 -6 -1 -1 172.98 17
 -6 -1 -1 155.88 17.4
 -6 -1 -1 183.78 20.9
 -6 -1 -1 142.39 17.4
 -6 -1 -1 154.68 18.5
 -6 -1 -1 161.68 14.6
 -6 -1 -1 182.18 18.3
 6 1 1 185.68 21.6
 6 1 1 146.09 17.2
 6 1 1 148.39 16.6
 6 1 1 141.49 15.4
 6 1 1 160.88 15.5
 6 1 1 115.59 17
 6 1 1 160.58 21.1
 6 1 1 201.58 18.2
 6 1 1 139.79 16.8
 -7 -1 -1 25.2 12.2
 -7 -1 -1 12.8 10.6
 -7 -1 -1 4.6 13
 -7 -1 -1 27.7 9.5
 -7 -1 -1 33.2 9.6
 -7 -1 -1 16.5 10.9
 -7 -1 -1 41.9 11.6
 -7 -1 -1 20.4 10.2
 7 1 1 26.2 11.2
 7 1 1 33.2 11.4
 7 1 1 27.8 9
 7 1 1 26.5 11.2
 7 1 1 32 10.3
 7 1 1 8.7 8.8
 7 1 1 26.2 11.5
 7 1 1 26 13.8
 7 1 1 8.2 11.8
 -8 -1 -1 50.29 14.1
 -8 -1 -1 61.29 14.2
 -8 -1 -1 68.59 14.9
 -8 -1 -1 66.39 12.4
 -8 -1 -1 40 17.4
 -8 -1 -1 77.39 12.2
 -8 -1 -1 54.69 17
 8 1 1 38.1 18
 8 1 1 67.39 15.2
 8 1 1 39.9 14.7
 8 1 1 63.19 17.8
 8 1 1 48.9 11.8
 8 1 1 69.69 13.2
 8 1 1 35.2 13.4
 8 1 1 43.3 14.3
 8 1 1 38.7 13.9
 -9 -1 -1 -9.4 15.5
 -9 -1 -1 4.8 11.3
 -9 -1 -1 1.9 13.5
 -9 -1 -1 10.1 38.1
 -9 -1 -1 2.4 13.8
 -9 -1 -1 -8.2 10.1
 9 1 1 8.5 13.9
 9 1 1 13 15.9
 9 1 1 -12.1 12.6
 9 1 1 19.6 15.5
 9 1 1 -7.6 14.8
 9 1 1 -4 11.8
 9 1 1 -15.9 18.8
 9 1 1 30.6 21.6
 9 1 1 -17.4 15.3
 -10 -1 -1 15.5 19.4
 -10 -1 -1 4.3 13.7
 -10 -1 -1 8.1 12.3
 -10 -1 -1 8.9 15.6
 -10 -1 -1 4.8 19.2
 10 1 1 8.7 16
 10 1 1 10.3 18.5
 10 1 1 2 23.3
 10 1 1 -5 14.5
 10 1 1 10.4 17.7
 10 1 1 8.4 20.5
 10 1 1 2.3 18.5
 -11 -1 -1 12.7 22.4
 -11 -1 -1 -11.1 22.9
 -11 -1 -1 -14 19.2
 -11 -1 -1 38.3 15.1
 11 1 1 -54.69 20.2
 11 1 1 38.9 19.4
 11 1 1 37.8 20.1
 11 1 1 -0.2 23.3
 11 1 1 19 30.2
 -12 -1 -1 10.8 17.9
 -12 -1 -1 16 26.4
 -12 -1 -1 11.1 24.3
 -12 -1 -1 63.09 26.9
 12 1 1 -14.8 24
 12 1 1 -11.4 26.1
 12 1 1 26.7 21
 12 1 1 9.8 22.9
 12 1 1 8.6 37.1
 -13 -1 -1 -44 28.8
 -13 -1 -1 -21.5 27.8
 -13 -1 -1 5.3 20.5
 13 1 1 -2.1 47.6
 13 1 1 -18.2 24.8
 13 1 1 -15.4 29.4
 13 1 1 35.9 29
 -14 -1 -1 7.6 27.8
 -14 -1 -1 -7.6 34.4
 -14 -1 -1 1.4 34.6
 14 1 1 54.79 36.5
 14 1 1 31.4 39.9
 14 1 1 98.09 41.8
 14 1 1 21.3 29.3
 -15 -1 -1 -18.8 40.1
 15 1 1 12.5 51.59
 15 1 1 55.79 36
 15 1 1 69.29 43.6
 15 1 1 -22.5 42.4
 -16 -1 -1 44.8 56.09
 16 1 1 -111.79 59.39
 16 1 1 18.3 51.19
 16 1 1 56.99 54.49
 15 -2 -1 1.7 48.9
 15 -2 -1 12.4 51.79
 15 -2 -1 -117.19 58.29
 -15 2 1 -79.69 47.4
 -15 2 1 103.99 67.69
 14 -2 -1 44.3 38.8
 14 -2 -1 68.49 44.8
 14 -2 -1 18.9 43.2
 14 -2 -1 -23.7 44.1
 -14 2 1 -16.8 39
 -14 2 1 -134.39 50.09
 13 -2 -1 -49 33.8
 13 -2 -1 25.2 29.5
 13 -2 -1 43.4 45.2
 13 -2 -1 54.39 33.8
 -13 2 1 -9.7 44.7
 -13 2 1 9.1 32.2
 12 -2 -1 59.79 30
 12 -2 -1 60.49 34
 12 -2 -1 30.7 28.2
 12 -2 -1 -0.6 24.7
 -12 2 1 7.2 31.2
 -12 2 1 58.09 29.8
 -12 2 1 46.8 47.6
 11 -2 -1 -14.4 31.5
 11 -2 -1 71.79 39.7
 11 -2 -1 -6.1 20.9
 11 -2 -1 -35.6 21.9
 11 -2 -1 -24.8 24.7
 -11 2 1 13.6 24.4
 -11 2 1 22.3 30
 -11 2 1 16.8 11.6
 -11 2 1 8.8 22.7
 10 -2 -1 35.1 27.5
 10 -2 -1 106.39 23.3
 10 -2 -1 93.19 25.2
 10 -2 -1 80.19 23.4
 10 -2 -1 25.2 34.6
 10 -2 -1 77.39 22.9
 -10 2 1 106.69 23.5
 -10 2 1 76.79 22.4
 -10 2 1 97.19 25.8
 -10 2 1 67.09 12.7
 -10 2 1 116.59 29.4
 9 -2 -1 29.2 16.7
 9 -2 -1 29.8 17
 9 -2 -1 16.1 17
 9 -2 -1 -13.1 15.6
 9 -2 -1 19.4 23.6
 9 -2 -1 -43.7 39.8
 9 -2 -1 -14.4 15.1
 -9 2 1 -0.8 18
 -9 2 1 -7.6 14.9
 -9 2 1 22.3 19.8
 -9 2 1 16.6 9
 -9 2 1 12.8 17
 8 -2 -1 -1.3 17
 8 -2 -1 6 14.9
 8 -2 -1 5.1 17.4
 8 -2 -1 -2.6 12.4
 8 -2 -1 5.2 13.1
 8 -2 -1 29.1 15.3
 8 -2 -1 0.2 18.2
 8 -2 -1 -3 21.8
 8 -2 -1 -20.1 13.3
 -8 2 1 10.7 7.7
 -8 2 1 14.8 12.7
 -8 2 1 16.3 16.1
 -8 2 1 13.8 20.1
 -8 2 1 -2.1 15.9
 -8 2 1 -8.5 15
 7 -2 -1 36.7 19.1
 7 -2 -1 60.19 12.6
 7 -2 -1 66.09 15.7
 7 -2 -1 71.99 15.9
 7 -2 -1 66.19 21
 7 -2 -1 80.39 15.4
 7 -2 -1 56.69 15.5
 7 -2 -1 67.49 12.7
 7 -2 -1 84.99 15.3
 -7 2 1 74.29 9.3
 -7 2 1 82.89 18.2
 -7 2 1 61.99 20.8
 -7 2 1 73.39 14.3
 -7 2 1 34.9 15
 -7 2 1 54.79 17.7
 6 -2 -1 139.39 17.4
 6 -2 -1 113.39 14.8
 6 -2 -1 141.09 26.1
 6 -2 -1 152.98 22.2
 6 -2 -1 133.09 23.3
 6 -2 -1 123.99 17.3
 6 -2 -1 106.79 16.9
 6 -2 -1 110.99 13.8
 -6 2 1 125.79 17.8
 -6 2 1 138.69 19.6
 -6 2 1 120.59 17.6
 -6 2 1 121.89 15.4
 -6 2 1 111.09 11.2
 -6 2 1 87.69 17.9
 -6 2 1 124.69 18.3
 5 -2 -1 12.7 7
 5 -2 -1 17.3 7.2
 5 -2 -1 7.9 9.3
 5 -2 -1 5 12.1
 5 -2 -1 21.2 8.7
 5 -2 -1 2.9 12
 5 -2 -1 13 8.8
 5 -2 -1 15.2 8.2
 -5 2 1 10.8 9.8
 -5 2 1 1.2 4.5
 -5 2 1 13.5 8.1
 -5 2 1 1 11.1
 -5 2 1 20.2 10.2
 -5 2 1 -2.5 10.5
 -5 2 1 10.8 7.9
 4 -2 -1 220.18 21.9
 4 -2 -1 198.68 21.4
 4 -2 -1 218.28 20
 4 -2 -1 264.07 19.6
 4 -2 -1 193.68 18.2
 4 -2 -1 222.18 17.3
 4 -2 -1 225.48 18.6
 4 -2 -1 233.78 19.4
 -4 2 1 263.47 21
 -4 2 1 198.78 22.1
 -4 2 1 194.08 20.6
 -4 2 1 231.58 20.2
 -4 2 1 238.28 18.7
 3 -2 -1 409.56 26.9
 3 -2 -1 416.76 28.4
 3 -2 -1 397.46 28.5
 3 -2 -1 439.06 29.1
 3 -2 -1 380.16 30
 3 -2 -1 422.56 27
 3 -2 -1 394.76 28
 3 -2 -1 343.07 28.9
 3 -2 -1 363.76 27.4
 -3 2 1 413.76 28.9
 -3 2 1 407.36 26.1
 -3 2 1 396.36 26.8
 -3 2 1 415.36 31
 -3 2 1 346.17 29.1
 -3 2 1 420.56 27.8
 -3 2 1 366.06 28.9
 2 -2 -1 1140.09 72.49
 2 -2 -1 1205.48 73.29
 2 -2 -1 1045.4 73.19
 2 -2 -1 1150.48 71.99
 2 -2 -1 1092.49 72.39
 2 -2 -1 1111.09 73.89
 2 -2 -1 1072.09 72.99
 2 -2 -1 1148.09 71.59
 -2 2 1 1188.08 72.49
 -2 2 1 1081.89 73.29
 -2 2 1 1114.49 73.39
 -2 2 1 1143.69 71.79
 -2 2 1 1114.69 73.29
 -2 2 1 1149.58 71.49
 1 -2 -1 447.06 29.5
 1 -2 -1 495.55 30.8
 1 -2 -1 397.26 30.4
 1 -2 -1 430.06 30
 1 -2 -1 468.65 30.6
 1 -2 -1 428.36 29.5
 1 -2 -1 440.76 29.4
 -1 2 1 487.15 30
 -1 2 1 462.65 29.1
 -1 2 1 442.16 29.6
 -1 2 1 416.36 29.1
 -1 2 1 475.85 30.5
 0 -2 -1 849.52 54.29
 0 -2 -1 819.72 54.89
 0 -2 -1 836.12 54.49
 0 -2 -1 917.11 54.89
 0 -2 -1 894.61 55.09
 0 -2 -1 793.82 54.09
 0 -2 -1 859.81 54.89
 0 2 1 842.22 54.89
 0 2 1 729.63 53.99
 0 2 1 931.01 54.79
 0 2 1 887.71 54.19
 0 2 1 833.72 54.89
 0 2 1 893.41 55.19
 0 2 1 829.12 54.49
 -1 -2 -1 6585.94 389.36
 -1 -2 -1 6446.05 389.26
 -1 -2 -1 6240.08 389.56
 -1 -2 -1 6425.76 389.66
 -1 -2 -1 5582.94 389.16
 -1 -2 -1 5941.01 389.06
 -1 -2 -1 5868.41 388.66
 -1 -2 -1 5616.54 388.86
 -1 -2 -1 6853.11 389.46
 -1 -2 -1 6666.03 389.66
 1 2 1 6342.37 389.26
 1 2 1 6192.38 389.36
 1 2 1 6530.75 389.26
 1 2 1 6548.64 389.56
 1 2 1 6214.98 389.26
 1 2 1 5814.92 388.76
 1 2 1 5833.92 388.96
 1 2 1 5790.22 388.66
 -2 -2 -1 293.57 20.7
 -2 -2 -1 279.97 20.7
 -2 -2 -1 333.77 21
 -2 -2 -1 285.77 21
 -2 -2 -1 282.97 21
 -2 -2 -1 340.27 21.8
 -2 -2 -1 330.67 21.7
 -2 -2 -1 323.47 21.5
 2 2 1 287.07 20.8
 2 2 1 304.87 20.5
 2 2 1 305.17 21.7
 2 2 1 296.77 21.6
 2 2 1 286.87 20.4
 2 2 1 314.97 21
 -3 -2 -1 344.27 25.6
 -3 -2 -1 364.16 26.1
 -3 -2 -1 352.96 24.4
 -3 -2 -1 378.76 25
 -3 -2 -1 353.36 25.6
 -3 -2 -1 390.86 25.8
 -3 -2 -1 346.17 24.8
 -3 -2 -1 358.46 25.8
 -3 -2 -1 373.76 25.3
 3 2 1 356.86 24.2
 3 2 1 379.76 25.4
 3 2 1 344.07 24.7
 3 2 1 352.66 26
 3 2 1 361.66 25.4
 3 2 1 375.26 25.8
 3 2 1 340.07 24.9
 3 2 1 377.56 25.7
 3 2 1 385.06 26.2
 -4 -2 -1 379.16 27.1
 -4 -2 -1 374.06 26.1
 -4 -2 -1 382.66 27.4
 -4 -2 -1 410.06 27.3
 -4 -2 -1 376.66 26.7
 -4 -2 -1 376.66 27.2
 -4 -2 -1 348.57 25.1
 -4 -2 -1 385.76 27.9
 4 2 1 404.36 27.9
 4 2 1 359.86 26.2
 4 2 1 380.76 26.7
 4 2 1 348.27 27.7
 4 2 1 358.36 26.9
 4 2 1 379.16 26.5
 4 2 1 350.36 27.1
 4 2 1 388.76 27.2
 -5 -2 -1 17.6 8.1
 -5 -2 -1 31.9 8.2
 -5 -2 -1 14.4 8.1
 -5 -2 -1 24.5 6.3
 -5 -2 -1 20.1 7.1
 -5 -2 -1 36.7 8.1
 -5 -2 -1 26.4 9.8
 5 2 1 38.5 8
 5 2 1 32.3 7.1
 5 2 1 20.9 7.7
 5 2 1 24.4 7.1
 5 2 1 26.2 7
 5 2 1 29.7 7.8
 5 2 1 24.2 11.4
 5 2 1 25 8.6
 -6 -2 -1 65.29 11.3
 -6 -2 -1 87.69 13.6
 -6 -2 -1 68.89 11.7
 -6 -2 -1 79.49 13.3
 -6 -2 -1 100.29 11.9
 -6 -2 -1 83.09 13
 -6 -2 -1 60.89 12.9
 6 2 1 83.09 12
 6 2 1 70.69 11.8
 6 2 1 101.49 13.6
 6 2 1 74.69 12.3
 6 2 1 93.29 14.9
 6 2 1 89.79 11.5
 6 2 1 47.8 12.2
 6 2 1 95.69 11.6
 6 2 1 93.19 14
 -7 -2 -1 53.59 10.5
 -7 -2 -1 43.7 11.3
 -7 -2 -1 12.4 14.4
 -7 -2 -1 51.09 12.4
 -7 -2 -1 42.1 11.9
 -7 -2 -1 28.1 11.6
 -7 -2 -1 30 13.2
 7 2 1 35.6 11
 7 2 1 46 13.3
 7 2 1 30.2 13.8
 7 2 1 30 12.2
 7 2 1 51.09 11.7
 7 2 1 30.4 12.4
 7 2 1 58.29 11.9
 7 2 1 59.39 10.5
 7 2 1 48.6 10.6
 -8 -2 -1 41.8 12.7
 -8 -2 -1 37.7 14.7
 -8 -2 -1 29 12.1
 -8 -2 -1 34.3 10.6
 -8 -2 -1 49.4 18.6
 -8 -2 -1 28.1 15.2
 -8 -2 -1 48.1 13.4
 8 2 1 22.3 11
 8 2 1 35.6 14
 8 2 1 27.8 12.4
 8 2 1 22.9 15.9
 8 2 1 30.7 14.4
 8 2 1 29.5 11.9
 8 2 1 20.6 13.1
 8 2 1 34.8 12.6
 8 2 1 7.8 13.1
 -9 -2 -1 37.9 16.5
 -9 -2 -1 57.29 15.4
 -9 -2 -1 56.59 22.4
 -9 -2 -1 59.79 13.2
 -9 -2 -1 51.09 16.7
 -9 -2 -1 49.99 17.7
 9 2 1 36.6 14.5
 9 2 1 61.39 21.3
 9 2 1 29.9 16.4
 9 2 1 66.69 16.3
 9 2 1 40.3 17
 9 2 1 19.4 18
 9 2 1 64.89 14.9
 9 2 1 66.19 16.5
 -10 -2 -1 101.59 22.1
 -10 -2 -1 46.6 18.8
 -10 -2 -1 83.39 21.9
 -10 -2 -1 60.29 15.4
 10 2 1 61.29 20
 10 2 1 51.09 26.2
 10 2 1 86.09 18.1
 10 2 1 70.49 21.9
 10 2 1 27.3 19.9
 10 2 1 73.89 19
 -11 -2 -1 24.2 16.4
 -11 -2 -1 42 22.3
 -11 -2 -1 2.6 23.1
 -11 -2 -1 12.6 14.5
 -11 -2 -1 -19.5 18.4
 11 2 1 -2.8 18.4
 11 2 1 6.9 17.1
 11 2 1 -12.2 29.7
 11 2 1 -27.1 21.2
 11 2 1 2.1 22.3
 -12 -2 -1 0.6 24.6
 -12 -2 -1 50.89 29.2
 -12 -2 -1 18.5 19.2
 -12 -2 -1 42.4 24.6
 -12 -2 -1 -24.5 16.6
 12 2 1 -20 23.7
 12 2 1 21.8 23.7
 12 2 1 3 20.8
 12 2 1 30.9 38.3
 12 2 1 -2 26.2
 -13 -2 -1 42 21.9
 -13 -2 -1 37 36.4
 -13 -2 -1 -8.5 30.7
 -13 -2 -1 18 30
 13 2 1 0.1 25.2
 13 2 1 31.2 28.4
 13 2 1 22.1 48.3
 13 2 1 -3.8 32.2
 13 2 1 36.4 37.2
 -14 -2 -1 14.6 34.5
 -14 -2 -1 -19.1 33.5
 -14 -2 -1 26.9 24.5
 14 2 1 54.79 39.3
 14 2 1 19.3 29.9
 14 2 1 44.4 40
 14 2 1 -30.1 33.3
 -15 -2 -1 -88.19 38.1
 -15 -2 -1 -31.5 38.5
 15 2 1 52.29 42.2
 15 2 1 2.8 48.5
 15 2 1 -12.4 41.8
 15 2 1 26.2 35.2
 -16 -2 -1 50.99 52.09
 16 2 1 -101.39 47.8
 16 2 1 3.2 41.2
 16 2 1 63.29 60.49
 16 2 1 31.5 51.99
 15 -3 -1 96.99 54.59
 15 -3 -1 36.1 55.99
 15 -3 -1 -97.69 66.99
 -15 3 1 83.19 55.99
 -15 3 1 71.69 73.79
 14 -3 -1 -0.3 41.3
 14 -3 -1 -81.89 43
 14 -3 -1 21.1 50.19
 -14 3 1 -61.69 42.7
 -14 3 1 -14 60.49
 13 -3 -1 71.89 37.8
 13 -3 -1 5.9 30.8
 13 -3 -1 9 43
 13 -3 -1 38.4 34.9
 -13 3 1 27.4 47.1
 -13 3 1 49.4 35.7
 12 -3 -1 -3.9 28.2
 12 -3 -1 12.7 40.8
 12 -3 -1 14.1 26.4
 12 -3 -1 -8.8 29.8
 -12 3 1 44.9 39.8
 -12 3 1 -17.2 28.2
 -12 3 1 30 30.9
 11 -3 -1 20.1 24.4
 11 -3 -1 -36.7 39.9
 11 -3 -1 -28.8 32.3
 11 -3 -1 25.2 24.2
 11 -3 -1 -0.9 23.3
 -11 3 1 28.4 24.6
 -11 3 1 3.1 33
 -11 3 1 9.3 25
 10 -3 -1 -25.2 27.5
 10 -3 -1 -12.5 20.2
 10 -3 -1 -4.7 23.1
 10 -3 -1 11.6 32.2
 10 -3 -1 31 20.6
 10 -3 -1 12.4 21
 -10 3 1 14.3 22.4
 -10 3 1 8.2 26.5
 -10 3 1 14 20
 9 -3 -1 79.09 27.3
 9 -3 -1 16.5 17.6
 9 -3 -1 11.4 17.1
 9 -3 -1 -1.7 18
 9 -3 -1 17.5 25.2
 9 -3 -1 31.5 17.2
 9 -3 -1 -1.3 16.9
 -9 3 1 -7.7 15.8
 -9 3 1 44.9 20.2
 -9 3 1 -1.9 21
 8 -3 -1 19.8 18.3
 8 -3 -1 4.6 13.3
 8 -3 -1 -10.4 14.2
 8 -3 -1 -6.8 19.8
 8 -3 -1 6.9 13.3
 8 -3 -1 6.8 13.3
 8 -3 -1 22.2 24.9
 -8 3 1 -1.3 17.7
 -8 3 1 16 14.1
 -8 3 1 27.9 17.1
 -8 3 1 -27.7 23.1
 7 -3 -1 109.69 26
 7 -3 -1 81.59 21.4
 7 -3 -1 101.39 18
 7 -3 -1 86.39 13.9
 7 -3 -1 69.59 14.1
 7 -3 -1 96.09 16.1
 7 -3 -1 104.29 20
 7 -3 -1 71.69 17.4
 -7 3 1 93.69 17.7
 -7 3 1 76.49 18.5
 -7 3 1 80.29 20.9
 -7 3 1 90.09 16.3
 -7 3 1 143.99 25.3
 6 -3 -1 117.69 16.5
 6 -3 -1 96.79 19.3
 6 -3 -1 90.09 12.8
 6 -3 -1 81.39 15.6
 6 -3 -1 96.79 13.2
 6 -3 -1 123.09 20.4
 6 -3 -1 77.39 16
 -6 3 1 85.79 14.3
 -6 3 1 111.39 19.1
 -6 3 1 88.09 18.2
 -6 3 1 91.79 15.8
 -6 3 1 93.79 21.1
 5 -3 -1 363.06 27.8
 5 -3 -1 325.87 32.1
 5 -3 -1 350.46 25.9
 5 -3 -1 274.97 29.3
 5 -3 -1 369.56 29.6
 5 -3 -1 370.96 27.1
 5 -3 -1 350.56 25.8
 5 -3 -1 349.27 27.1
 5 -3 -1 371.56 28.9
 -5 3 1 310.37 28.3
 -5 3 1 339.17 30.1
 -5 3 1 329.17 24.6
 -5 3 1 341.17 29.8
 -5 3 1 326.47 28.8
 4 -3 -1 22.1 11.1
 4 -3 -1 20 6.3
 4 -3 -1 14.1 8.2
 4 -3 -1 19.7 6.8
 4 -3 -1 17.2 9.2
 4 -3 -1 6.9 8.4
 4 -3 -1 13.8 7.7
 4 -3 -1 24.1 7.5
 4 -3 -1 8.5 11.2
 -4 3 1 21.8 9.7
 -4 3 1 24.5 6.6
 -4 3 1 23.4 6.8
 -4 3 1 20.2 9.8
 -4 3 1 10.9 10.4
 3 -3 -1 113.19 11.2
 3 -3 -1 116.89 12.8
 3 -3 -1 128.29 15.2
 3 -3 -1 149.88 13.1
 3 -3 -1 119.19 13.6
 3 -3 -1 124.69 16.2
 3 -3 -1 115.59 12.6
 3 -3 -1 127.09 12.4
 -3 3 1 141.59 12.1
 -3 3 1 114.59 15.4
 -3 3 1 169.28 23.1
 -3 3 1 95.99 13.9
 -3 3 1 132.79 12
 2 -3 -1 379.96 27.3
 2 -3 -1 431.16 29.4
 2 -3 -1 405.96 27.5
 2 -3 -1 421.36 28.5
 2 -3 -1 356.26 29
 2 -3 -1 414.56 29.3
 2 -3 -1 394.76 28.2
 2 -3 -1 425.36 26.7
 -2 3 1 422.26 26.2
 -2 3 1 431.26 28.1
 -2 3 1 394.46 26.2
 -2 3 1 420.86 27.8
 -2 3 1 376.66 30.7
 -2 3 1 408.96 29.3
 1 -3 -1 21.5 6.7
 1 -3 -1 30.2 6.2
 1 -3 -1 23.3 4.6
 1 -3 -1 31.8 5.3
 1 -3 -1 33.1 4.6
 1 -3 -1 29.4 6.6
 1 -3 -1 23.9 5.8
 -1 3 1 29.3 4.1
 -1 3 1 27.2 5.4
 -1 3 1 25.9 6.3
 -1 3 1 6.7 5.8
 -1 3 1 26.5 3.4
 -1 3 1 28.1 6
 -1 3 1 20.1 5.7
 -1 3 1 25.4 4.6
 0 -3 -1 3.7 2.9
 0 -3 -1 -2.6 3.9
 0 -3 -1 -4.2 4
 0 -3 -1 -1.4 3.4
 0 -3 -1 2.5 1.7
 0 -3 -1 0.8 4.6
 0 -3 -1 2.4 2.6
 0 -3 -1 4.9 4.5
 0 3 1 1.2 3.5
 0 3 1 4.2 4.6
 0 3 1 2.5 2.4
 0 3 1 3.7 2.5
 0 3 1 4.2 4.9
 0 3 1 4.4 4.1
 0 3 1 5.2 4.3
 0 3 1 4 1.9
 -1 -3 -1 7083.69 470.15
 -1 -3 -1 7960.3 471.45
 -1 -3 -1 8412.36 471.65
 -1 -3 -1 7616.34 470.95
 -1 -3 -1 7466.45 471.25
 -1 -3 -1 7691.43 471.55
 -1 -3 -1 7082.79 470.85
 -1 -3 -1 6968.3 470.45
 -1 -3 -1 7537.15 471.55
 1 3 1 8261.17 471.95
 1 3 1 7135.39 470.35
 1 3 1 7407.66 471.15
 1 3 1 7512.65 471.15
 1 3 1 8005.2 471.55
 1 3 1 7785.02 471.55
 1 3 1 6348.56 470.05
 1 3 1 7177.38 470.85
 -2 -3 -1 69.39 7.8
 -2 -3 -1 79.19 8.5
 -2 -3 -1 67.09 7.7
 -2 -3 -1 71.59 8.4
 -2 -3 -1 78.89 9.1
 -2 -3 -1 85.49 8.4
 -2 -3 -1 81.29 9.7
 -2 -3 -1 71.19 8.9
 -2 -3 -1 61.39 7.7
 2 3 1 79.89 8.6
 2 3 1 74.29 8.5
 2 3 1 66.19 8.4
 2 3 1 91.99 10.4
 2 3 1 72.59 9.9
 2 3 1 71.09 7.6
 2 3 1 64.69 6.5
 2 3 1 79.79 9.2
 2 3 1 74.79 7.9
 2 3 1 66.39 8.2
 -3 -3 -1 1471.65 96.49
 -3 -3 -1 1437.96 95.79
 -3 -3 -1 1533.05 96.89
 -3 -3 -1 1477.05 95.99
 -3 -3 -1 1537.75 97.99
 -3 -3 -1 1490.05 96.39
 -3 -3 -1 1591.34 96.59
 -3 -3 -1 1520.15 97.19
 3 3 1 1490.35 96.89
 3 3 1 1501.35 97.19
 3 3 1 1472.95 96.19
 3 3 1 1441.16 97.19
 3 3 1 1535.25 95.69
 3 3 1 1499.35 96.39
 3 3 1 1504.55 96.99
 -4 -3 -1 48.6 8.2
 -4 -3 -1 78.39 10.9
 -4 -3 -1 70.49 9.8
 -4 -3 -1 72.29 9.4
 -4 -3 -1 61.39 7.7
 -4 -3 -1 73.49 10.2
 -4 -3 -1 38.8 8.5
 -4 -3 -1 51.19 8
 -4 -3 -1 65.49 8.3
 4 3 1 49.3 8.1
 4 3 1 71.99 10.7
 4 3 1 65.69 8.9
 4 3 1 35.5 8
 4 3 1 58.39 9
 4 3 1 61.29 10.2
 4 3 1 74.89 8.2
 4 3 1 54.49 8
 -5 -3 -1 0.6 7
 -5 -3 -1 7.3 7.1
 -5 -3 -1 -6.9 5.9
 -5 -3 -1 2.6 4.5
 -5 -3 -1 3.3 6.4
 -5 -3 -1 -5.7 5.5
 -5 -3 -1 2.6 6.4
 -5 -3 -1 5.1 7.8
 5 3 1 -7.6 5.5
 5 3 1 -0.2 5.6
 5 3 1 0.4 6.4
 5 3 1 2.2 7
 5 3 1 2.4 7.1
 5 3 1 -9.1 7.3
 5 3 1 -2.4 6.2
 5 3 1 -5 8.4
 -6 -3 -1 76.39 13.3
 -6 -3 -1 90.59 12.8
 -6 -3 -1 85.09 12
 -6 -3 -1 88.89 13.6
 -6 -3 -1 72.39 12.8
 -6 -3 -1 84.49 11.8
 -6 -3 -1 90.49 9.9
 -6 -3 -1 71.99 13.3
 6 3 1 63.09 12.5
 6 3 1 93.79 14.7
 6 3 1 53.29 10.7
 6 3 1 85.19 12
 6 3 1 76.69 14.5
 6 3 1 88.99 13.6
 6 3 1 96.29 12
 6 3 1 92.79 13.6
 6 3 1 98.99 12.2
 -7 -3 -1 115.49 19.1
 -7 -3 -1 113.19 16
 -7 -3 -1 122.59 15.1
 -7 -3 -1 98.39 16.1
 -7 -3 -1 105.09 16.4
 -7 -3 -1 95.29 16.1
 -7 -3 -1 141.59 17.9
 7 3 1 117.49 15.4
 7 3 1 105.19 14.3
 7 3 1 115.39 15.5
 7 3 1 127.79 16.9
 7 3 1 123.19 18.1
 7 3 1 106.99 16.4
 7 3 1 92.49 18.5
 7 3 1 104.79 14.3
 7 3 1 123.79 19.2
 -8 -3 -1 31.7 14.6
 -8 -3 -1 57.99 12.1
 -8 -3 -1 60.59 16.2
 -8 -3 -1 43.1 13.4
 -8 -3 -1 52.29 14.4
 -8 -3 -1 61.69 17.4
 -8 -3 -1 47.1 13.5
 8 3 1 4.7 15.2
 8 3 1 37 13.9
 8 3 1 49.3 14.6
 8 3 1 32.1 13.4
 8 3 1 43.6 12.2
 8 3 1 31.3 12.1
 8 3 1 12.7 10.8
 8 3 1 57.09 13.4
 8 3 1 66.59 15.6
 -9 -3 -1 18.5 14.6
 -9 -3 -1 31.5 16.8
 -9 -3 -1 18.7 22.2
 -9 -3 -1 17.6 11
 -9 -3 -1 -6.5 14.4
 -9 -3 -1 4.3 11.9
 9 3 1 13.8 13.1
 9 3 1 13.1 29.9
 9 3 1 8.1 17.1
 9 3 1 13.6 14
 9 3 1 7.4 14.7
 9 3 1 20.8 14
 9 3 1 14.4 13.7
 9 3 1 27.4 19.7
 -10 -3 -1 139.19 24.2
 -10 -3 -1 87.49 17.1
 -10 -3 -1 72.29 22.5
 -10 -3 -1 114.49 22.5
 -10 -3 -1 109.29 21.6
 10 3 1 84.29 25.3
 10 3 1 88.19 23.3
 10 3 1 70.69 26.9
 10 3 1 89.59 23
 10 3 1 110.89 21.4
 10 3 1 128.29 21.5
 -11 -3 -1 42.5 20.5
 -11 -3 -1 37 16.3
 -11 -3 -1 48.8 23
 -11 -3 -1 84.79 26.6
 11 3 1 17.5 25.4
 11 3 1 26 30.9
 11 3 1 77.09 22.4
 11 3 1 51.39 18.9
 11 3 1 26.8 22.6
 11 3 1 59.89 23.4
 -12 -3 -1 -15.2 21.1
 -12 -3 -1 -11.5 22.6
 -12 -3 -1 11.3 23.5
 -12 -3 -1 -19 17.3
 12 3 1 -13.4 37
 12 3 1 -2.8 21.2
 12 3 1 17.3 23
 12 3 1 20.5 23.2
 12 3 1 33.9 27.8
 -13 -3 -1 9 29.9
 -13 -3 -1 22.7 28.8
 -13 -3 -1 0.8 21.1
 -13 -3 -1 12.4 23.9
 13 3 1 34.4 26.1
 13 3 1 86.49 30
 13 3 1 41.3 35.5
 13 3 1 49.1 38.1
 13 3 1 -21 45.9
 -14 -3 -1 35.2 34.1
 -14 -3 -1 -23.4 24.8
 -14 -3 -1 8.6 32.4
 14 3 1 19.5 43.5
 14 3 1 0.1 36.4
 14 3 1 35.6 39.1
 14 3 1 -13.7 29
 -15 -3 -1 9.3 30.5
 -15 -3 -1 -13 39.3
 -15 -3 -1 -18.5 37.7
 15 3 1 8.3 41.3
 15 3 1 1.3 48.2
 15 3 1 79.69 44.4
 15 3 1 -11.8 35.4
 -16 -3 -1 71.99 50.99
 16 3 1 -69.19 57.89
 16 3 1 -6.7 76.59
 16 3 1 -31.6 47.3
 16 3 1 -43 49.1
 14 -4 -1 -160.68 66.69
 14 -4 -1 -48.8 54.39
 14 -4 -1 6.9 43.8
 -14 4 1 -79.99 63.69
 -14 4 1 82.79 62.09
 13 -4 -1 -17.8 32.6
 13 -4 -1 -20.3 47.3
 13 -4 -1 34 37.9
 13 -4 -1 54.19 37.9
 -13 4 1 40.4 40.1
 -13 4 1 68.19 59.39
 12 -4 -1 41.5 31.4
 12 -4 -1 -57.29 45
 12 -4 -1 8.7 30
 12 -4 -1 24.3 28.9
 -12 4 1 36.6 45.3
 -12 4 1 46 31.2
 11 -4 -1 58.49 26.9
 11 -4 -1 134.09 44.4
 11 -4 -1 56.09 27.7
 11 -4 -1 131.89 34.8
 11 -4 -1 88.89 28.7
 -11 4 1 61.59 67.09
 -11 4 1 145.29 31.9
 -11 4 1 95.29 29.9
 10 -4 -1 153.08 32.8
 10 -4 -1 232.78 31.3
 10 -4 -1 220.68 41
 10 -4 -1 294.17 43.8
 10 -4 -1 245.28 33.4
 10 -4 -1 224.78 35.1
 10 -4 -1 254.57 34.6
 -10 4 1 247.68 34
 -10 4 1 253.37 33.5
 -10 4 1 280.67 43.9
 9 -4 -1 25.4 19.5
 9 -4 -1 50.19 27.5
 9 -4 -1 28.3 30.1
 9 -4 -1 26.1 18.2
 9 -4 -1 24.7 20.6
 9 -4 -1 55.69 28.2
 9 -4 -1 51.79 22.1
 -9 4 1 35.2 18.7
 -9 4 1 54.09 21.5
 -9 4 1 74.79 26.2
 8 -4 -1 303.77 31.7
 8 -4 -1 237.88 33.8
 8 -4 -1 211.58 27.7
 8 -4 -1 261.07 32
 8 -4 -1 254.77 34.9
 8 -4 -1 231.38 29.5
 8 -4 -1 256.37 30
 8 -4 -1 241.98 28.6
 -8 4 1 238.18 29.9
 -8 4 1 202.28 34.4
 -8 4 1 297.97 35.5
 -8 4 1 231.48 31.6
 7 -4 -1 -2.8 10.7
 7 -4 -1 5.7 15.6
 7 -4 -1 -4.6 11.6
 7 -4 -1 -0.7 16.6
 7 -4 -1 -30.3 17.8
 7 -4 -1 4.8 11.9
 7 -4 -1 -7.4 14.2
 7 -4 -1 20 18.7
 -7 4 1 -3.6 15.2
 -7 4 1 37.3 14.8
 -7 4 1 -11.2 19.8
 -7 4 1 -13.6 11.6
 6 -4 -1 -19.9 16.3
 6 -4 -1 4.1 9.9
 6 -4 -1 -5 8.9
 6 -4 -1 2.7 17.7
 6 -4 -1 3 10.4
 6 -4 -1 -13.1 13
 6 -4 -1 -1.6 13.4
 6 -4 -1 6.7 12.6
 6 -4 -1 17.2 12
 -6 4 1 -5.3 9.7
 -6 4 1 15.4 7.9
 -6 4 1 14.7 17
 -6 4 1 -0.5 13
 -6 4 1 -11.8 12.3
 5 -4 -1 245.58 21.2
 5 -4 -1 213.28 26.2
 5 -4 -1 256.57 22.2
 5 -4 -1 234.38 19.5
 5 -4 -1 204.18 24.7
 5 -4 -1 216.38 24.6
 5 -4 -1 265.07 23.1
 5 -4 -1 215.98 19.3
 5 -4 -1 234.88 20.2
 5 -4 -1 232.38 21.7
 5 -4 -1 176.28 24
 -5 4 1 193.18 23
 -5 4 1 217.18 24.9
 -5 4 1 211.88 22.4
 -5 4 1 216.68 19.1
 -5 4 1 233.78 25.8
 4 -4 -1 51.69 10.7
 4 -4 -1 74.49 9
 4 -4 -1 58.09 9.5
 4 -4 -1 57.89 11.7
 4 -4 -1 53.19 10.3
 4 -4 -1 73.09 12.9
 4 -4 -1 65.59 9.6
 4 -4 -1 31.7 13
 4 -4 -1 59.89 15.2
 -4 4 1 58.49 12.1
 -4 4 1 67.59 9.8
 -4 4 1 31.4 11.1
 -4 4 1 71.89 9.8
 -4 4 1 41.7 13.6
 3 -4 -1 32.4 9.4
 3 -4 -1 56.09 11.3
 3 -4 -1 57.29 8.2
 3 -4 -1 53.69 9.1
 3 -4 -1 47.1 8.3
 3 -4 -1 46.8 7.6
 3 -4 -1 33.1 8.8
 3 -4 -1 58.19 13.7
 3 -4 -1 49.3 10.8
 -3 4 1 40.7 10.9
 -3 4 1 52.89 7.4
 -3 4 1 38.3 11.8
 -3 4 1 61.09 9
 2 -4 -1 378.66 28.9
 2 -4 -1 349.17 26.4
 2 -4 -1 349.96 24.8
 2 -4 -1 353.16 25.9
 2 -4 -1 378.16 26.2
 2 -4 -1 314.47 26.7
 2 -4 -1 379.06 27
 -2 4 1 396.36 26.1
 -2 4 1 347.67 27.1
 -2 4 1 379.16 27.1
 -2 4 1 351.06 24.9
 1 -4 -1 519.85 33.1
 1 -4 -1 478.85 31.5
 1 -4 -1 445.36 33.6
 1 -4 -1 507.15 35.3
 1 -4 -1 479.55 30.8
 1 -4 -1 456.85 33
 -1 4 1 436.06 31.6
 -1 4 1 522.25 33
 -1 4 1 471.55 30.8
 -1 4 1 455.65 33.3
 -1 4 1 481.55 33.7
 0 -4 -1 671.33 45
 0 -4 -1 758.82 46.5
 0 -4 -1 659.83 44.5
 0 -4 -1 653.73 45.3
 0 -4 -1 746.23 46.7
 0 -4 -1 671.43 46.5
 0 -4 -1 684.03 46.8
 0 4 1 715.23 45.3
 0 4 1 701.13 45.6
 0 4 1 719.73 47
 0 4 1 737.13 46.7
 0 4 1 731.53 47.2
 0 4 1 672.43 44.8
 -1 -4 -1 161.38 12.9
 -1 -4 -1 152.48 11.3
 -1 -4 -1 157.88 12.3
 -1 -4 -1 174.38 12.9
 -1 -4 -1 182.48 14.4
 -1 -4 -1 169.58 14.2
 -1 -4 -1 186.88 14.8
 -1 -4 -1 171.98 13.6
 1 4 1 181.68 14.4
 1 4 1 170.58 12.6
 1 4 1 180.88 15.2
 1 4 1 180.38 15.2
 1 4 1 145.79 13.2
 1 4 1 158.68 12.3
 1 4 1 162.98 14.6
 -2 -4 -1 708.63 49.1
 -2 -4 -1 725.03 50.49
 -2 -4 -1 710.83 48.8
 -2 -4 -1 819.12 50.19
 -2 -4 -1 724.33 49.9
 -2 -4 -1 722.13 49.5
 -2 -4 -1 776.62 49.8
 -2 -4 -1 718.73 49
 2 4 1 756.22 48.9
 2 4 1 766.92 49.5
 2 4 1 733.23 50.19
 2 4 1 798.02 50.19
 2 4 1 742.23 49.8
 2 4 1 734.83 48
 2 4 1 770.12 49.1
 2 4 1 791.22 49.7
 -3 -4 -1 12.9 5.8
 -3 -4 -1 25 5.9
 -3 -4 -1 22.4 7
 -3 -4 -1 22.4 5.8
 -3 -4 -1 21 5.5
 -3 -4 -1 13.6 6
 -3 -4 -1 21.9 5.6
 -3 -4 -1 25.1 5.7
 3 4 1 18.6 5.6
 3 4 1 19 5.8
 3 4 1 12.4 7
 3 4 1 20.6 7.7
 3 4 1 21.4 6
 3 4 1 12.9 6.6
 -4 -4 -1 317.47 23.1
 -4 -4 -1 311.67 23.7
 -4 -4 -1 306.77 22.9
 -4 -4 -1 288.17 22.8
 -4 -4 -1 309.07 24.6
 -4 -4 -1 306.37 22.8
 -4 -4 -1 292.07 22
 -4 -4 -1 265.77 22.9
 -4 -4 -1 306.57 23.8
 4 4 1 276.07 22.3
 4 4 1 302.17 23
 4 4 1 335.17 22.8
 4 4 1 318.07 24.5
 4 4 1 316.87 23.1
 4 4 1 317.97 24.7
 4 4 1 235.28 25.3
 4 4 1 291.17 22.6
 4 4 1 286.27 24.3
 -5 -4 -1 15.5 6.4
 -5 -4 -1 6.2 6.4
 -5 -4 -1 -3.1 6.5
 -5 -4 -1 12.1 8.2
 -5 -4 -1 15 6.9
 -5 -4 -1 8 7.8
 -5 -4 -1 7.3 7.3
 -5 -4 -1 7.1 8
 -5 -4 -1 9.9 5.9
 5 4 1 7.6 6.8
 5 4 1 14.2 9.4
 5 4 1 5.3 6.3
 5 4 1 1.4 9.7
 5 4 1 -4.8 7.3
 5 4 1 11.6 7.1
 5 4 1 10.8 9.4
 5 4 1 9.8 7.5
 -6 -4 -1 41.6 10.2
 -6 -4 -1 57.79 14.2
 -6 -4 -1 52.69 9
 -6 -4 -1 57.39 10.5
 -6 -4 -1 41.8 11.1
 -6 -4 -1 62.89 10.4
 -6 -4 -1 41.7 10.4
 -6 -4 -1 45.9 12.6
 -6 -4 -1 53.39 11.6
 6 4 1 44.6 10.9
 6 4 1 59.69 12.2
 6 4 1 48.5 13.3
 6 4 1 50.79 12.3
 6 4 1 51.99 10
 6 4 1 57.19 13.9
 6 4 1 53.99 11
 6 4 1 63.19 10.3
 6 4 1 40.3 10.4
 -7 -4 -1 449.66 40.7
 -7 -4 -1 495.65 39
 -7 -4 -1 546.05 39.9
 -7 -4 -1 453.55 37.9
 -7 -4 -1 525.15 37.3
 -7 -4 -1 510.65 38.9
 -7 -4 -1 515.75 40
 -7 -4 -1 481.35 35.1
 -7 -4 -1 514.95 39.9
 7 4 1 492.25 41
 7 4 1 510.25 38.6
 7 4 1 486.45 37.1
 7 4 1 531.25 40.7
 7 4 1 494.25 38.2
 7 4 1 465.55 36.8
 7 4 1 498.15 40.5
 7 4 1 508.85 38.1
 7 4 1 574.74 39.4
 -8 -4 -1 162.38 21.4
 -8 -4 -1 118.79 21.1
 -8 -4 -1 156.38 23.1
 -8 -4 -1 159.18 20.9
 -8 -4 -1 131.59 16.6
 -8 -4 -1 133.49 20.8
 -8 -4 -1 148.19 19.6
 -8 -4 -1 167.88 21.5
 8 4 1 161.98 24
 8 4 1 151.08 19.3
 8 4 1 161.18 21.4
 8 4 1 166.48 20.2
 8 4 1 173.18 21.7
 8 4 1 158.48 20.4
 8 4 1 160.48 22.4
 8 4 1 148.89 21.3
 8 4 1 146.09 20.1
 -9 -4 -1 41.8 13.9
 -9 -4 -1 21.3 16.2
 -9 -4 -1 63.49 17.4
 -9 -4 -1 45 16.9
 -9 -4 -1 44.6 13.7
 9 4 1 32.1 14.4
 9 4 1 37.6 21.5
 9 4 1 45.6 14.8
 9 4 1 39.8 15.9
 9 4 1 64.69 19.2
 9 4 1 51.49 16.2
 9 4 1 6.6 14.9
 -10 -4 -1 26.4 16.5
 -10 -4 -1 34.5 18.9
 -10 -4 -1 67.39 15.7
 -10 -4 -1 75.59 19.3
 -10 -4 -1 61.99 24.1
 10 4 1 47.9 18.6
 10 4 1 38.8 18.6
 10 4 1 59.89 17.8
 10 4 1 105.09 26.2
 10 4 1 20.7 15.6
 10 4 1 69.79 22.1
 -11 -4 -1 119.79 25
 -11 -4 -1 59.29 18.8
 -11 -4 -1 49.3 21.2
 11 4 1 88.39 21.8
 11 4 1 52.89 31.4
 11 4 1 89.29 22.9
 11 4 1 38.1 20.6
 11 4 1 133.89 24.6
 11 4 1 110.99 27.8
 -12 -4 -1 4.2 22.8
 -12 -4 -1 1.1 22.4
 -12 -4 -1 -24.6 17.5
 12 4 1 24.2 23.4
 12 4 1 1.3 21.5
 12 4 1 -6.3 37
 12 4 1 -16.3 22.8
 12 4 1 9.9 26.2
 -13 -4 -1 2.1 23.7
 -13 -4 -1 21.7 27.8
 -13 -4 -1 21.3 27.8
 -13 -4 -1 13.5 22.3
 13 4 1 6.7 35.3
 13 4 1 -1.1 25.6
 13 4 1 0.5 28.6
 13 4 1 84.79 33
 -14 -4 -1 21.5 27.3
 -14 -4 -1 12.9 34
 -14 -4 -1 -15 30.5
 -14 -4 -1 -6.5 24.9
 14 4 1 -16.1 32.6
 14 4 1 -25.4 34
 14 4 1 -35.9 37.5
 14 4 1 -12.2 29.5
 -15 -4 -1 -62.09 36.4
 -15 -4 -1 -7.1 31
 -15 -4 -1 50.29 40.2
 15 4 1 45.9 40
 15 4 1 72.09 49
 15 4 1 -36.5 35.7
 15 4 1 -41.5 41.7
 -16 -4 -1 21.1 49.9
 -16 -4 -1 26 49.4
 -16 -4 -1 31.1 37.2
 16 4 1 -26.5 58.59
 16 4 1 97.19 51.99
 16 4 1 54.49 56.09
 16 4 1 34.4 45
 17 4 1 11.1 60.29
 14 -5 -1 68.69 49.4
 14 -5 -1 -103.49 73.79
 14 -5 -1 41.2 49.3
 -14 5 1 -50.19 64.39
 -14 5 1 -77.99 68.79
 13 -5 -1 -49.4 39.2
 13 -5 -1 -21.3 46.1
 13 -5 -1 -29.6 53.59
 -13 5 1 -59.19 40.4
 -13 5 1 87.19 57.99
 12 -5 -1 16.3 46.8
 12 -5 -1 -21.8 30.2
 12 -5 -1 41.3 34.2
 12 -5 -1 20.9 30.8
 -12 5 1 22.2 35
 -12 5 1 54.59 58.19
 11 -5 -1 1.7 30.7
 11 -5 -1 4.6 44.6
 11 -5 -1 22.1 27.7
 11 -5 -1 21.5 25.6
 -11 5 1 -3.2 26
 -11 5 1 -22.7 39.5
 10 -5 -1 18.5 35.8
 10 -5 -1 42.7 32.3
 10 -5 -1 22.4 24.8
 10 -5 -1 32.5 28.5
 10 -5 -1 -6.8 23.9
 10 -5 -1 1.5 21.1
 10 -5 -1 38.4 33.6
 -10 5 1 13.2 22.2
 -10 5 1 25.7 34.6
 -10 5 1 59.89 26.9
 9 -5 -1 85.59 25
 9 -5 -1 78.39 19.7
 9 -5 -1 65.99 25
 9 -5 -1 80.09 23.4
 9 -5 -1 18.2 21.1
 9 -5 -1 54.79 19.5
 9 -5 -1 70.89 29.9
 9 -5 -1 106.39 35.9
 -9 5 1 83.29 22.2
 -9 5 1 45.9 29.1
 -9 5 1 33.6 23.3
 8 -5 -1 70.49 25.3
 8 -5 -1 32.2 15.4
 8 -5 -1 37.4 27.3
 8 -5 -1 -4.5 17.1
 8 -5 -1 21.9 15
 8 -5 -1 34.5 19.8
 8 -5 -1 62.69 23.1
 8 -5 -1 12.7 21.2
 -8 5 1 22.3 21.3
 -8 5 1 -13.3 17.9
 -8 5 1 10.4 15.6
 7 -5 -1 7.6 17.8
 7 -5 -1 13.3 13.4
 7 -5 -1 22.8 19.7
 7 -5 -1 3.8 16.9
 7 -5 -1 17.9 12.4
 7 -5 -1 13.4 16.8
 7 -5 -1 7.6 15.3
 7 -5 -1 24.5 21.2
 7 -5 -1 -0.9 11.4
 -7 5 1 -9 13.1
 -7 5 1 -2 22.8
 -7 5 1 -6.3 16.8
 -7 5 1 -20.2 16
 6 -5 -1 -1.1 19
 6 -5 -1 -4.7 15.9
 6 -5 -1 -2.3 9.3
 6 -5 -1 27.4 11.4
 6 -5 -1 25 16.2
 6 -5 -1 13 14.4
 6 -5 -1 -12.5 10.8
 6 -5 -1 -1.1 10.2
 6 -5 -1 -4.1 14.6
 -6 5 1 16.6 14
 -6 5 1 -2.3 9.1
 -6 5 1 10.2 11.6
 -6 5 1 -18.1 14.1
 -6 5 1 2 18.1
 5 -5 -1 18.7 12.8
 5 -5 -1 -1.8 9
 5 -5 -1 22.1 15.4
 5 -5 -1 9.7 9.1
 5 -5 -1 1.9 9.6
 5 -5 -1 -2.4 12.7
 5 -5 -1 9.9 10.9
 5 -5 -1 12.8 12.5
 5 -5 -1 10.7 8
 5 -5 -1 15.5 14.1
 -5 5 1 -2.2 12.4
 -5 5 1 14.7 8.6
 -5 5 1 2.4 11.8
 -5 5 1 13.4 16
 4 -5 -1 371.66 29.5
 4 -5 -1 391.16 27.6
 4 -5 -1 399.96 31.5
 4 -5 -1 424.26 32.5
 4 -5 -1 418.66 29.7
 4 -5 -1 417.76 29.8
 4 -5 -1 362.06 31.7
 4 -5 -1 326.07 31.9
 4 -5 -1 352.16 36.8
 -4 5 1 427.36 33.7
 -4 5 1 406.76 29.1
 -4 5 1 389.76 29.3
 -4 5 1 362.46 33.3
 3 -5 -1 23.4 14.9
 3 -5 -1 52.99 11.4
 3 -5 -1 47.2 10.6
 3 -5 -1 45.2 8.6
 3 -5 -1 39.7 9.7
 3 -5 -1 36.1 7.7
 3 -5 -1 45 10.2
 3 -5 -1 52.49 11.9
 3 -5 -1 40.4 10.9
 3 -5 -1 43.1 9.6
 -3 5 1 43.5 9.9
 -3 5 1 39.1 7.5
 -3 5 1 48.7 12
 2 -5 -1 46.4 9.9
 2 -5 -1 41.1 8.4
 2 -5 -1 52.79 6.9
 2 -5 -1 46 10.3
 2 -5 -1 43.6 8.6
 2 -5 -1 60.49 9.6
 2 -5 -1 49 7.2
 2 -5 -1 38.2 9.5
 -2 5 1 45.2 10.5
 -2 5 1 35.6 6.4
 -2 5 1 42.4 10.5
 -2 5 1 29.1 8.5
 -2 5 1 59.99 10.9
 1 -5 -1 25.2 7.5
 1 -5 -1 15.8 7.7
 1 -5 -1 21.1 5.2
 1 -5 -1 27.8 7.1
 1 -5 -1 28.1 4.2
 1 -5 -1 20.2 7.6
 1 -5 -1 31.8 5.9
 -1 5 1 27 4.8
 -1 5 1 19 7.1
 -1 5 1 18.1 7.7
 -1 5 1 26.8 9.5
 -1 5 1 33.6 8.3
 -1 5 1 20 8.4
 0 -5 -1 132.99 13.7
 0 -5 -1 121.19 10.2
 0 -5 -1 135.49 11.1
 0 -5 -1 172.88 13.2
 0 -5 -1 143.49 13.9
 0 -5 -1 134.59 13.4
 0 -5 -1 118.49 10.8
 0 -5 -1 138.19 14.2
 0 5 1 139.89 14.1
 0 5 1 148.99 10.6
 0 5 1 154.28 14.1
 0 5 1 138.89 15
 0 5 1 120.99 10.5
 0 5 1 126.79 14.2
 0 5 1 141.09 11.5
 0 5 1 133.09 10.8
 -1 -5 -1 1742.73 116.79
 -1 -5 -1 1752.52 116.69
 -1 -5 -1 1809.52 116.69
 -1 -5 -1 1825.12 115.79
 -1 -5 -1 1788.72 115.09
 -1 -5 -1 1945.41 116.79
 -1 -5 -1 1797.92 119.29
 1 5 1 1847.02 115.49
 1 5 1 1829.72 116.69
 1 5 1 1811.92 116.99
 1 5 1 1729.03 115.99
 1 5 1 1844.22 115.39
 1 5 1 1797.12 117.29
 1 5 1 1842.92 115.39
 1 5 1 1878.31 116.79
 -2 -5 -1 839.42 55.49
 -2 -5 -1 862.91 55.79
 -2 -5 -1 822.22 55.79
 -2 -5 -1 805.82 54.49
 -2 -5 -1 817.42 54.29
 -2 -5 -1 808.52 55.39
 -2 -5 -1 815.62 56.69
 -2 -5 -1 853.91 55.29
 -2 -5 -1 812.12 54.69
 2 5 1 884.41 55.89
 2 5 1 880.11 55.19
 2 5 1 856.61 54.49
 2 5 1 839.62 54.39
 2 5 1 815.52 56.29
 2 5 1 854.11 54.79
 2 5 1 790.82 55.49
 2 5 1 758.92 53.09
 2 5 1 896.31 55.49
 -3 -5 -1 886.51 60.09
 -3 -5 -1 902.21 60.19
 -3 -5 -1 900.21 62.49
 -3 -5 -1 938.21 59.79
 -3 -5 -1 928.21 59.69
 -3 -5 -1 901.71 60.19
 -3 -5 -1 891.11 59.89
 -3 -5 -1 902.01 61.59
 3 5 1 963.1 60.29
 3 5 1 830.02 60.89
 3 5 1 904.01 60.29
 3 5 1 950.3 59.89
 3 5 1 911.61 59.59
 3 5 1 948.61 60.99
 3 5 1 870.41 58.39
 3 5 1 903.71 60.79
 -4 -5 -1 177.98 18.9
 -4 -5 -1 171.18 15.7
 -4 -5 -1 183.08 18.5
 -4 -5 -1 189.78 16.8
 -4 -5 -1 177.88 16.4
 -4 -5 -1 188.88 15.6
 -4 -5 -1 192.98 17.7
 -4 -5 -1 141.19 15.6
 -4 -5 -1 180.38 16.9
 4 5 1 173.68 16.6
 4 5 1 175.88 17.8
 4 5 1 162.48 16.2
 4 5 1 213.98 18.9
 4 5 1 154.98 15.7
 4 5 1 165.68 16.7
 4 5 1 178.58 18.8
 4 5 1 173.18 16.3
 4 5 1 164.88 16.3
 -5 -5 -1 957.1 64.39
 -5 -5 -1 880.01 64.39
 -5 -5 -1 897.71 62.39
 -5 -5 -1 1024.4 64.79
 -5 -5 -1 947.81 62.79
 -5 -5 -1 899.91 62.99
 -5 -5 -1 946.11 63.69
 -5 -5 -1 892.71 63.19
 -5 -5 -1 1028.9 63.89
 5 5 1 930.21 63.39
 5 5 1 888.31 65.09
 5 5 1 964.3 64.89
 5 5 1 911.41 64.49
 5 5 1 959.7 63.39
 5 5 1 946.31 62.89
 5 5 1 996.1 63.39
 5 5 1 929.01 63.39
 -6 -5 -1 50.89 11.9
 -6 -5 -1 59.59 10.6
 -6 -5 -1 54.99 11.6
 -6 -5 -1 47.5 9.4
 -6 -5 -1 50.79 13
 -6 -5 -1 37.5 11.5
 -6 -5 -1 58.39 11.9
 -6 -5 -1 60.69 12
 -6 -5 -1 60.19 11.6
 6 5 1 56.69 11
 6 5 1 42.1 11.4
 6 5 1 43.3 13.2
 6 5 1 58.79 12.2
 6 5 1 51.09 15.1
 6 5 1 37.8 10.4
 6 5 1 63.49 11.9
 6 5 1 47.7 10.5
 -7 -5 -1 8.2 10.8
 -7 -5 -1 18.7 10.5
 -7 -5 -1 10.5 12.8
 -7 -5 -1 -6.6 9.3
 -7 -5 -1 18.5 9.5
 -7 -5 -1 -0.2 13.3
 -7 -5 -1 6.9 11
 -7 -5 -1 1.2 8.3
 -7 -5 -1 4.8 10.7
 7 5 1 6.9 13.5
 7 5 1 5.7 9.3
 7 5 1 10.1 10.9
 7 5 1 20.8 11.8
 7 5 1 2.2 9.1
 7 5 1 9.4 14.1
 7 5 1 15.2 10.4
 7 5 1 6.7 10.4
 7 5 1 -8 9
 -8 -5 -1 6.8 12.6
 -8 -5 -1 4.2 13.8
 -8 -5 -1 7.2 15
 -8 -5 -1 -2.4 13.1
 -8 -5 -1 5.2 9.5
 -8 -5 -1 18.1 10.8
 -8 -5 -1 5.3 11
 -8 -5 -1 -36.7 15.2
 -8 -5 -1 6.7 12.2
 8 5 1 38.2 15.7
 8 5 1 1.6 11.6
 8 5 1 -4 11.5
 8 5 1 17.9 11.8
 8 5 1 -21.3 10.9
 8 5 1 14.8 17.2
 8 5 1 13.8 13.9
 8 5 1 -6.3 10.2
 8 5 1 24.5 12.9
 -9 -5 -1 60.09 18.8
 -9 -5 -1 89.79 19.3
 -9 -5 -1 95.49 18.3
 -9 -5 -1 49.8 19.6
 -9 -5 -1 89.69 16.3
 -9 -5 -1 93.19 13.7
 9 5 1 68.69 25.8
 9 5 1 103.59 19.1
 9 5 1 87.29 15.6
 9 5 1 94.49 21.1
 9 5 1 63.19 16.1
 9 5 1 49.6 18.2
 -10 -5 -1 1.1 15.5
 -10 -5 -1 44.8 19.5
 -10 -5 -1 -3.1 21.6
 -10 -5 -1 14.5 12
 -10 -5 -1 22.1 14.4
 10 5 1 -44.5 25.1
 10 5 1 16.4 17.2
 10 5 1 4.7 16.5
 10 5 1 3 15.6
 10 5 1 5.2 15.3
 10 5 1 23.1 19.6
 -11 -5 -1 118.29 26
 -11 -5 -1 145.19 23.3
 -11 -5 -1 181.78 29.6
 11 5 1 125.09 23.9
 11 5 1 121.19 23.8
 11 5 1 121.39 34.7
 11 5 1 157.88 27.6
 11 5 1 112.39 28.6
 11 5 1 121.49 25.7
 -12 -5 -1 7.1 18.9
 -12 -5 -1 1.9 22.4
 -12 -5 -1 -30.5 23.5
 12 5 1 6.2 22.7
 12 5 1 -20.5 21.8
 12 5 1 7.3 23.4
 12 5 1 40 25.7
 12 5 1 -8.5 25.8
 -13 -5 -1 34.2 28
 -13 -5 -1 6 28.8
 13 5 1 -0.6 31.8
 13 5 1 1.3 31.3
 13 5 1 42 27
 -14 -5 -1 -6.8 25.8
 -14 -5 -1 -9.2 32.9
 -14 -5 -1 -8.6 31.9
 14 5 1 34.9 32.4
 14 5 1 7 34.9
 14 5 1 46.4 34.7
 14 5 1 -15.8 37
 -15 -5 -1 -0.1 36.6
 -15 -5 -1 -23.9 40.3
 -15 -5 -1 19.4 32.2
 15 5 1 30.3 42.5
 15 5 1 -34.8 42.8
 15 5 1 100.99 48.5
 15 5 1 4 43.1
 -16 -5 -1 12.9 75.99
 -16 -5 -1 42.7 49.1
 16 5 1 84.39 59.29
 16 5 1 51.29 46.9
 16 5 1 18.6 53.59
 16 5 1 -13.3 48.3
 -17 -5 -1 -20.2 56.59
 17 5 1 74.09 72.39
 17 5 1 -81.99 63.79
 17 5 1 30.4 58.39
 17 5 1 52.59 55.49
 13 -6 -1 5.4 52.09
 13 -6 -1 22.5 75.59
 -13 6 1 61.29 46.4
 -13 6 1 -77.69 61.59
 12 -6 -1 8.1 48.4
 12 -6 -1 -68.79 29.6
 12 -6 -1 9.3 35.6
 -12 6 1 -19 51.99
 -12 6 1 -53.89 36
 11 -6 -1 48.2 30.1
 11 -6 -1 83.19 32
 11 -6 -1 -40.8 42
 11 -6 -1 6.6 25.6
 -11 6 1 56.59 46.2
 -11 6 1 57.09 32.6
 10 -6 -1 14.9 26
 10 -6 -1 -4.5 25.7
 10 -6 -1 7.5 37
 10 -6 -1 13.6 20.9
 -10 6 1 7.8 23.5
 -10 6 1 4 36.1
 9 -6 -1 31 19.3
 9 -6 -1 45.8 23.5
 9 -6 -1 -12.7 27.2
 9 -6 -1 31.2 17.3
 9 -6 -1 11.1 25.5
 9 -6 -1 26.6 37.1
 9 -6 -1 47.8 24.9
 -9 6 1 26.4 21
 -9 6 1 41.4 30.5
 -9 6 1 50.59 23.9
 8 -6 -1 16.3 23.8
 8 -6 -1 41.2 20.1
 8 -6 -1 -0.9 15.3
 8 -6 -1 56.39 30
 8 -6 -1 34.1 20.2
 8 -6 -1 3.8 21.2
 8 -6 -1 18.9 14.9
 8 -6 -1 24.4 26.7
 -8 6 1 -17.3 19.5
 -8 6 1 28.6 25.4
 -8 6 1 37.9 17
 7 -6 -1 -3.1 22.2
 7 -6 -1 -17.9 20
 7 -6 -1 0.4 18.3
 7 -6 -1 -2 15.9
 7 -6 -1 -2.6 13.1
 7 -6 -1 29.1 12.7
 7 -6 -1 18.6 12.6
 7 -6 -1 0.9 17.6
 7 -6 -1 8 20.5
 7 -6 -1 17.9 17.9
 -7 6 1 9.9 20
 -7 6 1 15.5 16.6
 -7 6 1 -14.5 13
 -7 6 1 -20.9 26.3
 6 -6 -1 43.9 12
 6 -6 -1 64.49 15.9
 6 -6 -1 52.19 17.9
 6 -6 -1 46.3 11.2
 6 -6 -1 15.3 12.4
 6 -6 -1 89.19 19.3
 6 -6 -1 73.19 18.9
 6 -6 -1 30.2 17.4
 6 -6 -1 52.09 17.1
 6 -6 -1 52.39 14.2
 6 -6 -1 20.3 20.1
 -6 6 1 15.8 12.9
 -6 6 1 28.4 17.8
 -6 6 1 32.5 22
 -6 6 1 32.4 12.9
 -6 6 1 5.7 14.7
 5 -6 -1 7.9 14.5
 5 -6 -1 4.2 10.9
 5 -6 -1 22.8 13.6
 5 -6 -1 41.8 14.8
 5 -6 -1 16.4 11.5
 5 -6 -1 8.3 13.1
 5 -6 -1 7 10.8
 5 -6 -1 -12.6 11.3
 5 -6 -1 -7.2 17.4
 5 -6 -1 12.5 8.7
 5 -6 -1 -0.9 12.8
 -5 6 1 5.7 10.4
 -5 6 1 -9.4 14.1
 -5 6 1 12.9 14
 4 -6 -1 26.6 9.4
 4 -6 -1 6.1 17.2
 4 -6 -1 10.2 11
 4 -6 -1 -4.2 9.2
 4 -6 -1 1 10.1
 4 -6 -1 -0.6 6.5
 4 -6 -1 13.1 9.7
 4 -6 -1 -9.3 11
 4 -6 -1 0.2 11
 4 -6 -1 8.6 10.5
 -4 6 1 9.8 9.5
 -4 6 1 7 14.7
 -4 6 1 -4.8 13.7
 -4 6 1 -5 12.3
 -4 6 1 -2.1 7.2
 3 -6 -1 333.07 26.6
 3 -6 -1 297.87 28.9
 3 -6 -1 316.07 27.6
 3 -6 -1 362.66 28.4
 3 -6 -1 335.67 27
 3 -6 -1 356.16 28.1
 3 -6 -1 342.17 26.7
 3 -6 -1 293.37 25
 3 -6 -1 374.66 25.6
 -3 6 1 322.17 30.1
 -3 6 1 338.97 27.5
 -3 6 1 364.36 29.1
 -3 6 1 341.07 24.8
 2 -6 -1 6.5 8.8
 2 -6 -1 10.7 5.9
 2 -6 -1 4.6 7.9
 2 -6 -1 1.6 5.7
 2 -6 -1 4.1 8.3
 2 -6 -1 0.3 8.6
 2 -6 -1 15.7 7.7
 2 -6 -1 -7.6 8.4
 -2 6 1 1.1 8.5
 -2 6 1 7 9.3
 -2 6 1 10.8 9.3
 -2 6 1 17.4 10.7
 -2 6 1 8.3 4.9
 1 -6 -1 147.69 13.9
 1 -6 -1 167.48 12.3
 1 -6 -1 188.28 16
 1 -6 -1 154.68 13.3
 1 -6 -1 136.99 15.6
 1 -6 -1 176.08 17.2
 1 -6 -1 150.28 17.9
 -1 6 1 157.68 16.6
 -1 6 1 180.48 16.9
 -1 6 1 132.09 18.1
 -1 6 1 159.48 17.9
 0 -6 -1 6.6 4.8
 0 -6 -1 27 8.9
 0 -6 -1 33.8 10
 0 -6 -1 25.3 7.6
 0 -6 -1 22.2 5.5
 0 -6 -1 20.6 4.5
 0 6 1 24.9 8
 0 6 1 17.2 5.2
 0 6 1 25.2 5.3
 0 6 1 20.6 8.1
 0 6 1 22.5 9.8
 0 6 1 23 5.7
 0 6 1 18.4 8.2
 -1 -6 -1 561.24 36.5
 -1 -6 -1 515.85 35.3
 -1 -6 -1 485.45 38.5
 -1 -6 -1 494.65 34.5
 -1 -6 -1 539.75 37.1
 -1 -6 -1 521.95 36.8
 -1 -6 -1 511.55 37.2
 1 6 1 496.75 35.6
 1 6 1 547.85 37
 1 6 1 512.95 34.8
 1 6 1 557.14 37.1
 1 6 1 521.45 34.5
 1 6 1 484.75 37.7
 1 6 1 531.45 37.1
 1 6 1 526.05 39.2
 -2 -6 -1 -1.7 5.2
 -2 -6 -1 -5.8 5.1
 -2 -6 -1 -12.5 8.2
 -2 -6 -1 -10 6.5
 -2 -6 -1 8.8 7.3
 -2 -6 -1 -0.8 7.1
 -2 -6 -1 3.6 5.3
 -2 -6 -1 -0.3 7.5
 -2 -6 -1 -9.6 6.5
 2 6 1 -14.4 8.1
 2 6 1 2.6 5.7
 2 6 1 1.5 5.1
 2 6 1 -3 7.6
 2 6 1 8.5 5.7
 2 6 1 -0.4 6.4
 2 6 1 6.1 7.6
 2 6 1 -1 7.3
 -3 -6 -1 2028.5 122.99
 -3 -6 -1 1871.41 122.89
 -3 -6 -1 1902.21 123.49
 -3 -6 -1 1907.91 124.39
 -3 -6 -1 1843.62 124.79
 -3 -6 -1 1935.11 122.79
 -3 -6 -1 1972.6 123.39
 -3 -6 -1 2021.5 124.19
 -3 -6 -1 1960.6 123.69
 3 6 1 1921.81 122.79
 3 6 1 1952.4 122.79
 3 6 1 1869.21 123.99
 3 6 1 2016.7 122.79
 3 6 1 1801.52 121.09
 3 6 1 1957.7 123.59
 3 6 1 1815.42 124.29
 3 6 1 1793.52 123.79
 3 6 1 1870.21 123.89
 -4 -6 -1 899.41 61.59
 -4 -6 -1 880.91 63.09
 -4 -6 -1 867.81 61.19
 -4 -6 -1 840.22 62.49
 -4 -6 -1 946.51 61.09
 -4 -6 -1 874.41 61.39
 -4 -6 -1 876.31 61.69
 -4 -6 -1 982.3 62.89
 4 6 1 940.51 61.59
 4 6 1 936.41 61.69
 4 6 1 946.41 61.39
 4 6 1 893.21 62.09
 4 6 1 941.61 63.79
 4 6 1 942.91 61.09
 4 6 1 917.51 64.09
 4 6 1 937.01 61.19
 4 6 1 929.31 62.99
 -5 -6 -1 8.8 8.7
 -5 -6 -1 13.6 9.6
 -5 -6 -1 14.3 10.2
 -5 -6 -1 8.6 10
 -5 -6 -1 18 7.7
 -5 -6 -1 14.1 7.6
 -5 -6 -1 5.3 8.6
 -5 -6 -1 3.4 8.7
 -5 -6 -1 12 9.1
 5 6 1 4.6 11.1
 5 6 1 -0.9 7.1
 5 6 1 -0.9 10.3
 5 6 1 17.5 8.2
 5 6 1 4.8 8.7
 5 6 1 14.5 7.8
 5 6 1 3.2 10.6
 5 6 1 9.9 9.2
 -6 -6 -1 112.99 19
 -6 -6 -1 108.89 16.5
 -6 -6 -1 119.59 18.3
 -6 -6 -1 171.48 20.5
 -6 -6 -1 143.19 17.9
 -6 -6 -1 170.78 20.5
 -6 -6 -1 123.49 16.8
 -6 -6 -1 147.49 16.9
 -6 -6 -1 155.98 17.2
 6 6 1 147.89 18.1
 6 6 1 151.98 20.7
 6 6 1 141.29 18.1
 6 6 1 119.49 18
 6 6 1 177.38 22.4
 6 6 1 154.08 18.7
 6 6 1 130.59 16.9
 6 6 1 166.38 17
 -7 -6 -1 282.07 29.6
 -7 -6 -1 382.66 31.4
 -7 -6 -1 269.67 30.7
 -7 -6 -1 283.87 29
 -7 -6 -1 343.97 30.2
 -7 -6 -1 255.47 31.4
 -7 -6 -1 363.16 27.7
 -7 -6 -1 305.17 27
 -7 -6 -1 332.67 30
 7 6 1 314.97 28.1
 7 6 1 309.67 28.8
 7 6 1 344.37 29.1
 7 6 1 288.37 33.7
 7 6 1 339.57 31.5
 7 6 1 349.96 29.4
 7 6 1 342.37 29.4
 7 6 1 321.77 32.4
 -8 -6 -1 -4.2 17.5
 -8 -6 -1 13.5 13.1
 -8 -6 -1 0.6 15.5
 -8 -6 -1 6.6 14.5
 -8 -6 -1 3.7 14
 -8 -6 -1 13.7 12.9
 -8 -6 -1 13 13.2
 -8 -6 -1 18.3 11.1
 -8 -6 -1 27.7 12.1
 8 6 1 -2.3 15.2
 8 6 1 10.8 12
 8 6 1 11.7 12.4
 8 6 1 -16.5 17.7
 8 6 1 7 10.6
 8 6 1 8.1 13.6
 8 6 1 9.9 12.1
 8 6 1 17.3 12.7
 8 6 1 19.3 12.7
 -9 -6 -1 119.59 19.6
 -9 -6 -1 122.09 22.8
 -9 -6 -1 134.79 17.5
 -9 -6 -1 130.29 23
 -9 -6 -1 122.59 21
 -9 -6 -1 50.59 19.9
 9 6 1 127.89 19.5
 9 6 1 132.99 24.8
 9 6 1 133.69 26.9
 9 6 1 121.79 21.6
 9 6 1 89.19 22.4
 9 6 1 104.99 17
 -10 -6 -1 32 16.2
 -10 -6 -1 -4.1 17.9
 -10 -6 -1 15.5 16.7
 -10 -6 -1 16.3 13.9
 10 6 1 7.1 14.8
 10 6 1 -50.39 26.6
 10 6 1 11.1 20.7
 10 6 1 -6.7 16.8
 10 6 1 24.8 17.8
 10 6 1 7.4 18.1
 -11 -6 -1 28.3 17.8
 -11 -6 -1 20.1 21.4
 -11 -6 -1 18.6 15.4
 -11 -6 -1 -28.7 20.2
 11 6 1 23.4 23.7
 11 6 1 23.5 21.2
 11 6 1 -2.6 21.7
 11 6 1 15.1 18.6
 11 6 1 19 20.5
 -12 -6 -1 298.17 35.5
 -12 -6 -1 263.97 37.6
 -12 -6 -1 308.07 40.3
 12 6 1 178.38 37.6
 12 6 1 275.87 38.1
 12 6 1 313.57 40.1
 12 6 1 176.38 33.6
 12 6 1 285.57 33.7
 -13 -6 -1 23.9 29.1
 -13 -6 -1 75.89 30.9
 -13 -6 -1 26.2 25
 13 6 1 56.89 28.4
 13 6 1 62.69 30.6
 13 6 1 78.69 37.6
 13 6 1 55.49 33.8
 13 6 1 65.69 34.2
 -14 -6 -1 103.79 37.8
 -14 -6 -1 28.5 28.7
 -14 -6 -1 14.2 34.8
 14 6 1 92.09 37.9
 14 6 1 132.99 42.7
 14 6 1 99.49 34.8
 14 6 1 27.5 38
 -15 -6 -1 -7.3 41.6
 -15 -6 -1 40.3 40.8
 -15 -6 -1 11.7 38.4
 15 6 1 14.1 47.4
 15 6 1 -22.3 37.4
 15 6 1 32.3 43.3
 15 6 1 -26.3 38.3
 -16 -6 -1 -46.8 38.7
 -16 -6 -1 12.4 50.59
 -16 -6 -1 71.09 51.99
 16 6 1 -59.59 49.99
 16 6 1 71.19 48.3
 16 6 1 -37.5 56.59
 16 6 1 59.59 52.39
 -17 -6 -1 -13.7 57.89
 -17 -6 -1 -54.69 45.7
 -17 -6 -1 52.79 60.89
 17 6 1 -46.9 54.89
 17 6 1 53.09 72.79
 17 6 1 33.6 57.89
 17 6 1 85.29 61.99
 13 -7 -1 151.68 69.59
 -13 7 1 162.18 73.79
 12 -7 -1 -130.49 71.39
 12 -7 -1 52.69 39.8
 -12 7 1 24 58.89
 -12 7 1 -77.29 37.2
 11 -7 -1 54.89 47.7
 11 -7 -1 26.7 34.4
 11 -7 -1 3.6 32.7
 -11 7 1 -58.89 32.6
 -11 7 1 50.49 51.49
 10 -7 -1 65.09 30.9
 10 -7 -1 20.9 28.9
 10 -7 -1 4.7 41.9
 10 -7 -1 -6.7 20.1
 -10 7 1 10.6 26.5
 -10 7 1 11.4 39.8
 9 -7 -1 22 16.6
 9 -7 -1 37.2 20.7
 9 -7 -1 -19.5 28.1
 9 -7 -1 -10.1 24.7
 9 -7 -1 -31.3 60.59
 9 -7 -1 48.7 27.4
 9 -7 -1 5.8 25.2
 -9 7 1 -0.2 21.9
 -9 7 1 20 33.5
 8 -7 -1 26.2 22.3
 8 -7 -1 -0.7 22.6
 8 -7 -1 32.3 13.9
 8 -7 -1 -57.49 22.9
 8 -7 -1 28.3 30.4
 8 -7 -1 2.1 23
 8 -7 -1 9.1 16.7
 8 -7 -1 7.6 28.9
 8 -7 -1 16.2 24.8
 -8 7 1 -7.9 22.3
 -8 7 1 31.4 18.8
 -8 7 1 16.1 27.1
 7 -7 -1 186.78 27.4
 7 -7 -1 161.98 19.1
 7 -7 -1 156.08 30.7
 7 -7 -1 228.38 27.8
 7 -7 -1 176.68 25.1
 7 -7 -1 138.09 22.2
 7 -7 -1 159.78 33.1
 7 -7 -1 156.08 25.2
 7 -7 -1 184.78 28.3
 7 -7 -1 199.18 23.7
 -7 7 1 182.28 31.1
 -7 7 1 205.88 26.9
 6 -7 -1 -7 10.6
 6 -7 -1 38.9 17.8
 6 -7 -1 13.6 24.1
 6 -7 -1 31.6 19.2
 6 -7 -1 7.4 18.2
 6 -7 -1 -5.3 15.4
 6 -7 -1 8.6 15.1
 6 -7 -1 15.3 10.8
 6 -7 -1 12.2 15.5
 6 -7 -1 19.4 14.6
 6 -7 -1 -25.7 20.2
 -6 7 1 3.1 18.3
 -6 7 1 23.6 13.2
 5 -7 -1 -0.6 8.9
 5 -7 -1 16.4 12.9
 5 -7 -1 10.7 14.5
 5 -7 -1 12.3 15
 5 -7 -1 15.4 13.8
 5 -7 -1 21.8 16
 5 -7 -1 -12.6 18.4
 5 -7 -1 4.8 12.6
 5 -7 -1 35.8 15.2
 5 -7 -1 -1.2 12.5
 -5 7 1 -14.5 17.6
 -5 7 1 0.3 11.9
 -5 7 1 21.4 13.4
 -5 7 1 10.9 16.9
 4 -7 -1 10.5 11.3
 4 -7 -1 23.2 12.3
 4 -7 -1 -17.8 11.4
 4 -7 -1 20.4 10.5
 4 -7 -1 5 12.7
 4 -7 -1 40.1 18.4
 4 -7 -1 11.8 7.4
 4 -7 -1 -10.6 12.9
 4 -7 -1 -0.1 10.6
 4 -7 -1 -9.4 12.8
 4 -7 -1 18.9 10.7
 -4 7 1 24.1 15.3
 -4 7 1 -1 11.2
 -4 7 1 -4.1 7.8
 -4 7 1 15.3 14.4
 3 -7 -1 47.4 13.9
 3 -7 -1 48.5 13.1
 3 -7 -1 44.5 11.2
 3 -7 -1 49.4 9.8
 3 -7 -1 52.89 12
 3 -7 -1 48.7 13.3
 3 -7 -1 57.89 13.8
 3 -7 -1 57.39 10.2
 3 -7 -1 47.1 11.9
 -3 7 1 31.7 13.6
 -3 7 1 50.89 8.5
 -3 7 1 -15.4 22.8
 -3 7 1 52.09 13
 -3 7 1 58.09 15.6
 2 -7 -1 6.9 12.7
 2 -7 -1 19.6 10.7
 2 -7 -1 1.6 6.2
 2 -7 -1 -1 10.6
 2 -7 -1 5.6 10.9
 2 -7 -1 18.7 7.4
 2 -7 -1 11.7 10.8
 2 -7 -1 -1.1 8.1
 2 -7 -1 -9.4 8.3
 -2 7 1 17.3 12.2
 -2 7 1 -20.6 11.1
 -2 7 1 12.4 10
 -2 7 1 -5.4 11
 -2 7 1 15 10.8
 1 -7 -1 11.1 9.6
 1 -7 -1 22.8 5
 1 -7 -1 7.3 9.5
 1 -7 -1 19 8.3
 1 -7 -1 20.7 6.7
 1 -7 -1 16 7
 1 -7 -1 13.2 9
 -1 7 1 25.8 10.9
 -1 7 1 14.4 10.9
 -1 7 1 33.7 10.5
 -1 7 1 12.9 10.6
 -1 7 1 5.5 9.3
 0 -7 -1 68.59 7.9
 0 -7 -1 73.59 11
 0 -7 -1 53.29 8.2
 0 -7 -1 104.89 12.4
 0 -7 -1 72.19 12.7
 0 -7 -1 82.99 13.2
 0 -7 -1 69.49 12.5
 0 -7 -1 58.49 7.3
 0 7 1 47.5 12.2
 0 7 1 68.89 8.5
 0 7 1 78.69 13.8
 0 7 1 80.09 8.4
 0 7 1 63.49 11.3
 0 7 1 67.19 13.7
 0 7 1 55.29 7.4
 0 7 1 68.19 13.2
 -1 -7 -1 109.19 14
 -1 -7 -1 102.39 15.1
 -1 -7 -1 113.79 13.3
 -1 -7 -1 119.89 15.1
 -1 -7 -1 77.59 10.2
 -1 -7 -1 84.29 14.2
 -1 -7 -1 78.39 10.4
 1 7 1 89.99 11.4
 1 7 1 96.69 14.8
 1 7 1 89.29 10.2
 1 7 1 109.99 15.7
 1 7 1 80.19 9.5
 1 7 1 90.89 14.3
 1 7 1 92.69 13.5
 1 7 1 87.09 11
 -2 -7 -1 4.3 6.3
 -2 -7 -1 -8.6 6.1
 -2 -7 -1 11.9 9.6
 -2 -7 -1 -3.8 8.8
 -2 -7 -1 -7.4 9.9
 -2 -7 -1 2 7.8
 -2 -7 -1 8.4 6.2
 -2 -7 -1 -2.5 9.2
 -2 -7 -1 12.4 8.4
 2 7 1 7.6 8.8
 2 7 1 -7.4 8.7
 2 7 1 11.9 9.8
 2 7 1 -1.5 5.2
 2 7 1 8.8 7.4
 2 7 1 -6.8 6.2
 2 7 1 -2.1 10.5
 -3 -7 -1 1945.11 118.79
 -3 -7 -1 1778.02 118.79
 -3 -7 -1 1842.22 119.99
 -3 -7 -1 1774.42 120.39
 -3 -7 -1 1795.92 119.79
 -3 -7 -1 1716.53 121.29
 -3 -7 -1 1807.32 119.49
 -3 -7 -1 1897.81 120.29
 -3 -7 -1 1929.21 119.09
 3 7 1 1880.11 120.89
 3 7 1 1810.02 120.39
 3 7 1 1951.5 118.89
 3 7 1 1886.01 118.79
 3 7 1 1836.12 120.39
 3 7 1 1938.61 118.69
 3 7 1 1815.12 119.89
 3 7 1 1746.13 120.79
 -4 -7 -1 98.09 13.9
 -4 -7 -1 102.19 16.1
 -4 -7 -1 83.39 12.8
 -4 -7 -1 110.19 15.7
 -4 -7 -1 90.89 17.2
 -4 -7 -1 102.49 15.8
 -4 -7 -1 106.09 13
 -4 -7 -1 113.69 14.8
 -4 -7 -1 115.09 13.4
 4 7 1 92.59 15.3
 4 7 1 74.29 16.2
 4 7 1 86.39 10.1
 4 7 1 105.49 14.5
 4 7 1 110.99 14.6
 4 7 1 84.29 13
 4 7 1 92.99 12.4
 4 7 1 82.09 12.3
 4 7 1 85.69 12
 -5 -7 -1 177.68 22
 -5 -7 -1 173.18 22.1
 -5 -7 -1 211.58 18.7
 -5 -7 -1 187.08 19.4
 -5 -7 -1 131.79 19.1
 -5 -7 -1 187.08 20.2
 -5 -7 -1 183.28 21.6
 -5 -7 -1 163.28 19
 -5 -7 -1 216.78 20.5
 5 7 1 175.68 22.7
 5 7 1 197.08 23.2
 5 7 1 135.09 18.1
 5 7 1 153.78 19.8
 5 7 1 198.88 18.3
 5 7 1 161.78 21.5
 5 7 1 158.08 19.5
 5 7 1 168.98 19.2
 -6 -7 -1 -2.5 11
 -6 -7 -1 -3.9 9.6
 -6 -7 -1 -10.9 8.4
 -6 -7 -1 26.3 14.1
 -6 -7 -1 5.1 12.9
 -6 -7 -1 3.3 10
 -6 -7 -1 18.9 9.6
 -6 -7 -1 2.7 10.4
 -6 -7 -1 6.1 10.8
 6 7 1 -3.6 10
 6 7 1 9.2 14
 6 7 1 -3.4 11.6
 6 7 1 5.5 10.4
 6 7 1 -6.7 10.1
 6 7 1 12.1 10.6
 6 7 1 0.3 14.2
 6 7 1 -13.3 8.6
 -7 -7 -1 84.79 17.1
 -7 -7 -1 120.79 20.5
 -7 -7 -1 102.49 16.8
 -7 -7 -1 118.99 16.3
 -7 -7 -1 85.59 16.9
 -7 -7 -1 110.89 16.3
 -7 -7 -1 106.19 18.2
 -7 -7 -1 110.99 17.5
 -7 -7 -1 67.49 18.2
 7 7 1 108.79 17.2
 7 7 1 96.49 17.2
 7 7 1 115.59 22.7
 7 7 1 122.59 21.2
 7 7 1 121.99 18
 7 7 1 99.59 16.6
 7 7 1 94.69 20
 7 7 1 89.59 15.4
 -8 -7 -1 22.6 15.1
 -8 -7 -1 10.1 20
 -8 -7 -1 30.8 16.3
 -8 -7 -1 40.3 14.4
 -8 -7 -1 57.89 18.9
 -8 -7 -1 -2.2 15
 -8 -7 -1 22.3 12.5
 -8 -7 -1 22.7 12.8
 8 7 1 29.5 13.3
 8 7 1 1.7 15.9
 8 7 1 34.8 21
 8 7 1 57.29 19.1
 8 7 1 35.4 20.5
 8 7 1 21.9 14.1
 8 7 1 22.1 17.2
 8 7 1 11.1 13.6
 -9 -7 -1 30.3 16.9
 -9 -7 -1 -9.8 15
 -9 -7 -1 7.3 14.8
 -9 -7 -1 17.8 12.7
 -9 -7 -1 26.7 14.9
 9 7 1 27.8 18.1
 9 7 1 45.8 16.7
 9 7 1 6.8 19.8
 9 7 1 16.2 12.8
 9 7 1 23.9 15.4
 9 7 1 41.6 26.5
 -10 -7 -1 6.4 16.1
 -10 -7 -1 -6.7 19.3
 -10 -7 -1 14.9 19.6
 -10 -7 -1 12.2 14.9
 -10 -7 -1 -11.8 16.7
 10 7 1 16.3 18.9
 10 7 1 3 19.2
 10 7 1 7.1 17.4
 10 7 1 18.7 21.1
 10 7 1 -9 14.1
 -11 -7 -1 -2.2 22.3
 -11 -7 -1 -8.2 17.3
 -11 -7 -1 27.6 18.2
 -11 -7 -1 -14 20.6
 11 7 1 -18.7 18.3
 11 7 1 -1.3 20.1
 11 7 1 27.3 21.7
 11 7 1 -26.2 23.8
 11 7 1 22.6 18.5
 -12 -7 -1 -0.8 20.3
 -12 -7 -1 4.3 20.1
 -12 -7 -1 -5.1 24.7
 -12 -7 -1 45.1 26.1
 12 7 1 -0.3 23.8
 12 7 1 10.7 22.4
 12 7 1 6.1 25.7
 12 7 1 19.1 29.6
 12 7 1 32.7 24.1
 -13 -7 -1 58.89 31.5
 -13 -7 -1 15.8 30.4
 -13 -7 -1 51.79 24.7
 13 7 1 8.7 30.4
 13 7 1 -5.4 28.2
 13 7 1 38.5 33.9
 13 7 1 -27.1 30.4
 13 7 1 39.1 27.6
 -14 -7 -1 13.9 34.3
 -14 -7 -1 -37.7 34.7
 -14 -7 -1 -4.6 47.6
 14 7 1 -54.89 35.8
 14 7 1 23.5 33.2
 14 7 1 -5.2 57.09
 14 7 1 59.69 40.3
 -15 -7 -1 18.2 49.5
 -15 -7 -1 -2.3 41.2
 -15 -7 -1 12.6 33
 15 7 1 -18.3 36.7
 15 7 1 23.6 48.1
 15 7 1 -74.79 40.3
 15 7 1 -6.5 41.2
 -16 -7 -1 69.89 55.99
 -16 -7 -1 -43.5 39.1
 -16 -7 -1 -0.4 49.7
 16 7 1 27.2 49.3
 16 7 1 -63.49 51.69
 16 7 1 -78.29 49.2
 16 7 1 39.3 60.29
 -17 -7 -1 51.09 65.79
 -17 -7 -1 1.9 65.39
 -17 -7 -1 59.09 48.3
 17 7 1 -25.2 59.09
 17 7 1 12.7 68.69
 17 7 1 39.4 59.79
 17 7 1 25.2 58.69
 12 -8 -1 94.99 69.19
 -12 8 1 -92.79 67.79
 11 -8 -1 27.8 39.5
 11 -8 -1 84.39 67.69
 -11 8 1 -77.89 33.5
 -11 8 1 15.6 55.99
 10 -8 -1 -4.2 49
 10 -8 -1 87.69 34.8
 10 -8 -1 31.1 30.9
 -10 8 1 -58.99 27.3
 -10 8 1 -26.2 43.2
 9 -8 -1 79.49 30.5
 9 -8 -1 54.49 40.5
 9 -8 -1 110.59 37.5
 -9 8 1 44.4 24.3
 -9 8 1 48.5 38.4
 8 -8 -1 28.3 25.2
 8 -8 -1 80.19 26.6
 8 -8 -1 69.79 25.3
 8 -8 -1 68.29 19
 8 -8 -1 11.2 21.5
 8 -8 -1 80.49 30
 8 -8 -1 -26.8 35
 -8 8 1 47.3 20.9
 -8 8 1 -1.1 30.6
 7 -8 -1 143.79 28.5
 7 -8 -1 72.19 22.6
 7 -8 -1 122.69 25.3
 7 -8 -1 142.19 25.4
 7 -8 -1 91.09 17.5
 7 -8 -1 122.39 26
 7 -8 -1 101.59 31.6
 -7 8 1 109.29 30.1
 -7 8 1 152.88 21.7
 6 -8 -1 25.3 12.1
 6 -8 -1 27.2 18.7
 6 -8 -1 -14.9 18
 6 -8 -1 17 20.9
 6 -8 -1 15.4 17.9
 6 -8 -1 -4.6 20.3
 6 -8 -1 33.4 19
 6 -8 -1 30 26.4
 -6 8 1 9.2 21.9
 -6 8 1 32.7 23.7
 -6 8 1 23.4 13.7
 5 -8 -1 20.4 19.5
 5 -8 -1 18.6 15.9
 5 -8 -1 -1.3 15.5
 5 -8 -1 10.7 9.9
 5 -8 -1 29.7 24.6
 5 -8 -1 10.3 12.9
 5 -8 -1 -2.1 16.2
 5 -8 -1 8.3 16.7
 5 -8 -1 31.8 18.5
 -5 8 1 -1.4 19.1
 -5 8 1 -1.5 10.5
 -5 8 1 6.2 18.5
 4 -8 -1 223.48 26.9
 4 -8 -1 220.08 27
 4 -8 -1 242.58 30.6
 4 -8 -1 231.98 25.5
 4 -8 -1 209.08 24.1
 4 -8 -1 202.68 21.2
 4 -8 -1 182.88 21.6
 4 -8 -1 165.78 19.6
 4 -8 -1 203.18 17.9
 4 -8 -1 177.78 21.5
 4 -8 -1 221.78 27.6
 -4 8 1 206.58 19.7
 -4 8 1 216.28 29.6
 -4 8 1 199.88 26.3
 -4 8 1 230.28 25.2
 3 -8 -1 80.69 12.6
 3 -8 -1 95.29 15
 3 -8 -1 85.49 18.3
 3 -8 -1 97.49 16.8
 3 -8 -1 83.69 11.5
 3 -8 -1 78.39 16
 3 -8 -1 86.49 15.8
 3 -8 -1 66.99 17.2
 3 -8 -1 92.19 12.6
 -3 8 1 114.79 16.5
 -3 8 1 95.29 17.8
 -3 8 1 80.19 18.6
 2 -8 -1 32 9.3
 2 -8 -1 26.4 13.7
 2 -8 -1 35.8 14
 2 -8 -1 58.49 11.2
 2 -8 -1 45.7 7.5
 2 -8 -1 49.6 13.2
 2 -8 -1 80.99 14.7
 2 -8 -1 22.4 13.8
 2 -8 -1 59.09 10.6
 -2 8 1 -7 13.7
 -2 8 1 29.4 13.9
 -2 8 1 46.1 15.5
 -2 8 1 36.4 14.4
 -2 8 1 46.8 13.2
 1 -8 -1 89.99 11.5
 1 -8 -1 80.99 12.9
 1 -8 -1 96.19 16.6
 1 -8 -1 119.39 14.8
 1 -8 -1 92.79 16.8
 1 -8 -1 96.79 9.6
 1 -8 -1 117.29 18.5
 1 -8 -1 83.49 11.4
 -1 8 1 115.09 17.6
 -1 8 1 63.29 15.1
 -1 8 1 100.39 15.7
 -1 8 1 110.49 15.4
 -1 8 1 113.19 16.9
 0 -8 -1 143.39 17.2
 0 -8 -1 159.58 18.1
 0 -8 -1 141.59 20.2
 0 -8 -1 136.19 13.1
 0 -8 -1 154.98 17.9
 0 -8 -1 179.88 21.5
 0 -8 -1 124.49 13.1
 0 -8 -1 165.38 14.9
 0 8 1 129.99 19.2
 0 8 1 171.48 20.7
 0 8 1 149.19 19.2
 0 8 1 134.89 19.3
 0 8 1 178.88 19.9
 -1 -8 -1 59.29 13
 -1 -8 -1 64.59 10.3
 -1 -8 -1 73.39 12.5
 -1 -8 -1 67.99 14.6
 -1 -8 -1 78.89 9.1
 -1 -8 -1 80.99 15.2
 1 8 1 66.29 14.7
 1 8 1 57.99 9.6
 1 8 1 81.59 14.2
 1 8 1 53.19 13.4
 1 8 1 58.49 13.8
 1 8 1 56.19 10.2
 1 8 1 66.69 9.3
 1 8 1 60.69 14.8
 -2 -8 -1 192.08 21.9
 -2 -8 -1 193.48 21.9
 -2 -8 -1 217.58 20.9
 -2 -8 -1 226.68 26
 -2 -8 -1 209.88 19
 -2 -8 -1 185.48 22.6
 -2 -8 -1 220.08 18.5
 -2 -8 -1 225.08 22.1
 2 8 1 215.78 19.4
 2 8 1 171.28 24
 2 8 1 242.18 23.4
 2 8 1 208.98 17.3
 2 8 1 216.38 18.4
 2 8 1 210.08 19.5
 2 8 1 215.48 22.3
 2 8 1 187.08 23.4
 -3 -8 -1 2.4 12.9
 -3 -8 -1 -5.8 10
 -3 -8 -1 -2.7 9.7
 -3 -8 -1 -4.9 7.4
 -3 -8 -1 5.2 8.9
 -3 -8 -1 -6.9 6.9
 -3 -8 -1 -0.4 9.6
 -3 -8 -1 -15 10.7
 -3 -8 -1 -5.2 7.9
 3 8 1 -7.8 7.9
 3 8 1 3.5 11.3
 3 8 1 -1.2 7.2
 3 8 1 1.5 8.3
 3 8 1 -12.5 11.8
 3 8 1 -9.8 8.1
 3 8 1 10.5 11.6
 3 8 1 3.6 9.7
 -4 -8 -1 -3.6 11.3
 -4 -8 -1 5.3 8.8
 -4 -8 -1 -14.6 10.3
 -4 -8 -1 -19.3 9.7
 -4 -8 -1 0.8 9.1
 -4 -8 -1 -12.6 8.2
 -4 -8 -1 0.4 13.6
 -4 -8 -1 -3.6 8.5
 -4 -8 -1 0.2 10.2
 4 8 1 -4.9 11.9
 4 8 1 23.1 12.7
 4 8 1 -4.1 8.5
 4 8 1 -1.1 9.2
 4 8 1 -15.8 8.3
 4 8 1 6.2 12.5
 4 8 1 9.9 4.9
 4 8 1 -1.2 7.4
 4 8 1 -4.4 9
 -5 -8 -1 11.9 14.7
 -5 -8 -1 14.3 9.4
 -5 -8 -1 -16.8 8.9
 -5 -8 -1 -9.5 8.4
 -5 -8 -1 -1.6 10
 -5 -8 -1 -7 10.5
 -5 -8 -1 -9 10.8
 -5 -8 -1 -3.4 10.9
 -5 -8 -1 10 13
 5 8 1 -2 6.2
 5 8 1 -0.8 10
 5 8 1 -2.5 14
 5 8 1 -13.2 13.6
 5 8 1 14.6 9.9
 5 8 1 11.9 10.6
 5 8 1 8 10.1
 5 8 1 -3.1 15.3
 5 8 1 7.2 8.6
 -6 -8 -1 73.79 13.9
 -6 -8 -1 106.89 16.7
 -6 -8 -1 77.79 19.7
 -6 -8 -1 87.09 16.5
 -6 -8 -1 91.19 18.8
 -6 -8 -1 72.39 14.4
 -6 -8 -1 131.09 17
 -6 -8 -1 74.99 16.2
 -6 -8 -1 65.29 16.2
 6 8 1 81.99 20
 6 8 1 93.59 16
 6 8 1 81.39 15.1
 6 8 1 74.19 16
 6 8 1 86.59 19
 6 8 1 78.29 14.5
 6 8 1 88.29 16
 6 8 1 84.79 18.6
 -7 -8 -1 19.7 15
 -7 -8 -1 36.5 13.9
 -7 -8 -1 5.9 17.6
 -7 -8 -1 42.7 14.7
 -7 -8 -1 35.7 14
 -7 -8 -1 25.8 16.1
 -7 -8 -1 31.6 13.9
 -7 -8 -1 35.3 17.8
 -7 -8 -1 53.99 13.9
 7 8 1 28.5 14.1
 7 8 1 49.6 15.2
 7 8 1 37.4 13.4
 7 8 1 46.4 20.7
 7 8 1 34.2 18.7
 7 8 1 17.9 14.2
 7 8 1 52.99 13.7
 7 8 1 39.6 15.9
 -8 -8 -1 261.27 31.2
 -8 -8 -1 271.87 28.4
 -8 -8 -1 313.27 29
 -8 -8 -1 311.47 32.9
 -8 -8 -1 333.97 32.9
 -8 -8 -1 227.78 31.2
 8 8 1 275.27 37.7
 8 8 1 289.07 30.8
 8 8 1 237.48 30.6
 8 8 1 277.27 35.9
 8 8 1 251.07 33.9
 8 8 1 284.17 30.6
 -9 -8 -1 9.6 16.7
 -9 -8 -1 11.6 17.4
 -9 -8 -1 11.4 14.4
 -9 -8 -1 0.4 15.7
 -9 -8 -1 2.5 14.9
 9 8 1 -14.7 14.3
 9 8 1 -3.7 19
 9 8 1 11.8 20.5
 9 8 1 20.1 17.1
 9 8 1 21.7 13.1
 -10 -8 -1 73.79 22.6
 -10 -8 -1 22.4 22
 -10 -8 -1 55.49 22.4
 -10 -8 -1 36.9 17.2
 -10 -8 -1 55.69 19
 10 8 1 90.89 21.8
 10 8 1 12.4 19.8
 10 8 1 33.6 24.6
 10 8 1 54.49 25
 10 8 1 42.3 15.8
 -11 -8 -1 14.7 23.5
 -11 -8 -1 52.59 19.6
 -11 -8 -1 53.09 22.3
 -11 -8 -1 5.6 22.7
 11 8 1 12.9 22.9
 11 8 1 9.4 27.7
 11 8 1 57.59 29.9
 11 8 1 26.9 23
 11 8 1 19.5 18.6
 -12 -8 -1 31.2 28.8
 -12 -8 -1 33.5 23.2
 -12 -8 -1 9.4 28.5
 -12 -8 -1 -9.5 22.3
 12 8 1 51.29 22.9
 12 8 1 -23.9 30.1
 12 8 1 -18.1 26.4
 12 8 1 38.1 27.4
 12 8 1 41.6 31.5
 -13 -8 -1 -9.4 27.7
 -13 -8 -1 3.9 35.7
 -13 -8 -1 12.8 30.2
 13 8 1 -3.8 30.9
 13 8 1 -21 27.4
 13 8 1 -13 28.6
 13 8 1 30.7 34.4
 -14 -8 -1 51.69 31.4
 -14 -8 -1 30.8 33.5
 -14 -8 -1 28.7 40.6
 14 8 1 50.09 41.9
 14 8 1 -17.5 35.1
 14 8 1 48.5 37.3
 14 8 1 -31.6 38.1
 -15 -8 -1 75.79 52.29
 -15 -8 -1 -1.2 33.9
 -15 -8 -1 29.5 44.9
 15 8 1 -4.3 46
 15 8 1 -51.49 41.7
 15 8 1 19.1 44.4
 15 8 1 -18.9 48.6
 -16 -8 -1 -22.4 39.5
 -16 -8 -1 -31.2 51.79
 -16 -8 -1 94.69 60.99
 16 8 1 36.4 58.09
 16 8 1 -103.59 57.69
 16 8 1 -8.2 50.49
 16 8 1 78.39 53.79
 -17 -8 -1 -5.1 50.39
 -17 -8 -1 58.39 66.59
 17 8 1 -28 61.79
 17 8 1 49.1 62.89
 11 -9 -1 23 64.49
 -11 9 1 182.58 67.09
 10 -9 -1 -3.7 60.49
 -10 9 1 -12.1 49.99
 9 -9 -1 20.3 44.4
 9 -9 -1 -22.7 30.7
 9 -9 -1 11.2 39
 9 -9 -1 32.3 38.5
 -9 9 1 -41.3 24.4
 -9 9 1 40.3 43.3
 8 -9 -1 79.99 28.2
 8 -9 -1 76.69 44.8
 8 -9 -1 70.49 36.2
 8 -9 -1 113.69 28
 -8 9 1 60.09 23.3
 -8 9 1 63.09 37.5
 7 -9 -1 71.89 29.4
 7 -9 -1 5.7 23.6
 7 -9 -1 -0.2 30.4
 7 -9 -1 54.29 26.3
 7 -9 -1 37.8 20.7
 7 -9 -1 42.8 24.5
 7 -9 -1 27.1 16.6
 7 -9 -1 7.2 22.8
 -7 9 1 19.1 18.1
 -7 9 1 72.89 30.6
 6 -9 -1 48.1 24.6
 6 -9 -1 19.4 17.1
 6 -9 -1 40.8 21.8
 6 -9 -1 15.7 12.8
 6 -9 -1 28.5 30.6
 6 -9 -1 29.3 21.7
 6 -9 -1 11.9 21.5
 6 -9 -1 44.8 22.4
 -6 9 1 26.9 20.4
 -6 9 1 3.7 14.8
 -6 9 1 69.69 26.7
 -6 9 1 43.8 25.9
 5 -9 -1 4.6 19.7
 5 -9 -1 2.5 26.7
 5 -9 -1 -1 14
 5 -9 -1 19.5 19
 5 -9 -1 -14.6 18.9
 5 -9 -1 25.1 18.2
 5 -9 -1 24.6 17.4
 5 -9 -1 23.1 21.8
 -5 9 1 31 20.7
 -5 9 1 -10 20
 -5 9 1 30.1 11.6
 -5 9 1 31.5 18.7
 4 -9 -1 44.4 19.1
 4 -9 -1 14.3 17.2
 4 -9 -1 -10.9 16.7
 4 -9 -1 0.7 13.9
 4 -9 -1 -9.9 17.3
 4 -9 -1 5.9 24.9
 4 -9 -1 -6.1 10.7
 4 -9 -1 18.9 15.6
 4 -9 -1 15.6 8.4
 -4 9 1 -3 18.1
 -4 9 1 2.6 17.3
 3 -9 -1 19.3 8.5
 3 -9 -1 -20.3 16.6
 3 -9 -1 12.5 9.5
 3 -9 -1 2.5 15.1
 3 -9 -1 2.7 14.8
 3 -9 -1 5 15.4
 3 -9 -1 16.7 14.1
 3 -9 -1 15.8 12.3
 -3 9 1 41.1 17.7
 -3 9 1 7 15.4
 -3 9 1 -0.5 16.1
 -3 9 1 2.6 17.3
 2 -9 -1 81.09 20.4
 2 -9 -1 79.09 18.2
 2 -9 -1 110.39 14.1
 2 -9 -1 132.69 17.4
 2 -9 -1 131.99 20.7
 2 -9 -1 103.89 18.7
 2 -9 -1 104.29 15.1
 -2 9 1 101.69 19.4
 -2 9 1 97.99 16.5
 -2 9 1 112.89 21.1
 -2 9 1 76.09 19.2
 1 -9 -1 12.4 8.9
 1 -9 -1 19.7 13.8
 1 -9 -1 0.2 10.8
 1 -9 -1 -31.7 14.9
 1 -9 -1 13.4 12.2
 1 -9 -1 9.3 12.4
 1 -9 -1 12.4 15.2
 1 -9 -1 19.3 6.2
 1 -9 -1 7 9.9
 -1 9 1 -0.8 15.8
 -1 9 1 11.7 13.8
 -1 9 1 11.4 13
 -1 9 1 -14.2 12.9
 -1 9 1 9.1 15.1
 0 -9 -1 12.7 7.9
 0 -9 -1 -1.5 13.8
 0 -9 -1 10.8 9.9
 0 -9 -1 -8 12.9
 0 -9 -1 -9.6 10.8
 0 -9 -1 -6.1 12.1
 0 -9 -1 -2.9 6.1
 0 9 1 -3.6 14.2
 0 9 1 -1 12.6
 0 9 1 2.8 11.3
 0 9 1 -8.4 12
 0 9 1 -6.9 14.8
 -1 -9 -1 93.49 15.9
 -1 -9 -1 105.49 13.6
 -1 -9 -1 110.09 17.5
 -1 -9 -1 90.09 17.5
 -1 -9 -1 80.39 15
 1 9 1 86.79 16.3
 1 9 1 87.99 11.8
 1 9 1 87.49 11.6
 1 9 1 85.69 13.4
 1 9 1 101.89 16.3
 1 9 1 119.89 17.2
 1 9 1 78.19 18
 1 9 1 113.69 18.9
 -2 -9 -1 818.02 54.39
 -2 -9 -1 874.51 55.49
 -2 -9 -1 709.23 60.79
 -2 -9 -1 814.12 58.39
 -2 -9 -1 777.12 57.39
 -2 -9 -1 822.32 56.19
 -2 -9 -1 800.12 57.39
 -2 -9 -1 796.72 56.49
 2 9 1 842.12 57.19
 2 9 1 820.32 54.19
 2 9 1 811.12 55.09
 2 9 1 782.32 55.09
 2 9 1 791.22 57.39
 2 9 1 853.61 53.39
 2 9 1 811.52 58.59
 2 9 1 788.12 58.29
 2 9 1 770.02 58.69
 -3 -9 -1 11.2 13
 -3 -9 -1 -11.1 11.3
 -3 -9 -1 -6.8 15.8
 -3 -9 -1 9.2 10.2
 -3 -9 -1 11.1 9.8
 -3 -9 -1 -1.6 10.8
 -3 -9 -1 -0.2 11.9
 -3 -9 -1 -6.5 8.4
 3 9 1 13.3 13.9
 3 9 1 -1.2 11.8
 3 9 1 11.2 13.9
 3 9 1 -3.3 7.1
 3 9 1 10.5 10
 3 9 1 15 10.3
 3 9 1 -7 14.7
 3 9 1 16.2 9.5
 -4 -9 -1 3.7 10.3
 -4 -9 -1 6.1 16.2
 -4 -9 -1 3.7 12.7
 -4 -9 -1 5.9 10.1
 -4 -9 -1 -11.9 13.6
 -4 -9 -1 6.1 11.3
 -4 -9 -1 6.4 12.2
 -4 -9 -1 -1.4 11.9
 4 9 1 -9 10.2
 4 9 1 -10.4 7.8
 4 9 1 0.8 9.9
 4 9 1 13 10.1
 4 9 1 -17 14.1
 4 9 1 7.9 14.5
 4 9 1 -1.6 10.9
 -5 -9 -1 35.5 14.3
 -5 -9 -1 76.89 16.4
 -5 -9 -1 58.39 13.4
 -5 -9 -1 45.7 12.6
 -5 -9 -1 30.2 13.1
 -5 -9 -1 66.89 17.3
 -5 -9 -1 53.39 13.3
 -5 -9 -1 50.59 14.9
 -5 -9 -1 40.4 15.9
 5 9 1 42.2 18.1
 5 9 1 67.79 13.8
 5 9 1 65.79 14.3
 5 9 1 46.7 8.4
 5 9 1 55.59 13.7
 5 9 1 32.4 13.1
 5 9 1 10.7 16.9
 5 9 1 47.4 11.9
 -6 -9 -1 19.5 18
 -6 -9 -1 19.5 12.6
 -6 -9 -1 55.39 16.8
 -6 -9 -1 34.1 17.9
 -6 -9 -1 52.59 14.7
 -6 -9 -1 38 13.1
 -6 -9 -1 49.8 13.8
 -6 -9 -1 27.3 17.8
 -6 -9 -1 28.7 15.9
 6 9 1 41 18.5
 6 9 1 43.6 9.9
 6 9 1 38.6 15
 6 9 1 16.7 13.9
 6 9 1 47.9 14.2
 6 9 1 44.7 13
 6 9 1 49.6 15.1
 6 9 1 38.5 22.8
 6 9 1 65.59 20.7
 -7 -9 -1 -6.5 14.4
 -7 -9 -1 8.2 14.6
 -7 -9 -1 2.2 12.4
 -7 -9 -1 24.1 14.3
 -7 -9 -1 20 19.1
 -7 -9 -1 10.5 13.5
 7 9 1 -5 14.7
 7 9 1 10.5 14.5
 7 9 1 24.9 14.3
 7 9 1 -3.1 15.7
 7 9 1 -6.3 16.8
 7 9 1 20.7 13.5
 7 9 1 25.6 17.5
 -8 -9 -1 41.1 16.3
 -8 -9 -1 65.59 18.6
 -8 -9 -1 43.4 22.4
 -8 -9 -1 96.89 18.2
 -8 -9 -1 54.39 18.2
 -8 -9 -1 84.29 20.1
 8 9 1 89.49 24.3
 8 9 1 65.39 19.4
 8 9 1 57.99 21
 8 9 1 64.29 19.7
 8 9 1 57.89 18.1
 -9 -9 -1 -9.6 18.1
 -9 -9 -1 1.5 16.2
 -9 -9 -1 -21.4 17.7
 -9 -9 -1 8.1 16.4
 -9 -9 -1 -5.3 18.6
 9 9 1 7.2 22.1
 9 9 1 4.7 22.8
 9 9 1 1.8 17.9
 9 9 1 14.4 17.7
 -10 -9 -1 9.3 21.8
 -10 -9 -1 17.3 18.3
 -10 -9 -1 7.9 17.5
 -10 -9 -1 0.9 21.9
 -10 -9 -1 26.4 20.6
 10 9 1 3.1 19.6
 10 9 1 11.9 15.3
 10 9 1 16.7 23.1
 10 9 1 8.2 24.3
 10 9 1 -19.5 19.9
 -11 -9 -1 26.5 26.9
 -11 -9 -1 43.8 20.9
 -11 -9 -1 53.79 22.4
 -11 -9 -1 4.1 26.1
 -11 -9 -1 51.69 28.6
 11 9 1 29.1 23.6
 11 9 1 19.3 28.1
 11 9 1 28.4 18
 11 9 1 32.1 24.5
 11 9 1 49 27
 -12 -9 -1 42.4 30.2
 -12 -9 -1 54.19 26.6
 -12 -9 -1 -23 23.3
 -12 -9 -1 37.2 32.8
 12 9 1 44.4 22
 12 9 1 18.3 34.5
 12 9 1 27.1 34.3
 12 9 1 20.4 38.4
 12 9 1 40.2 28.3
 -13 -9 -1 105.89 46.8
 -13 -9 -1 13.1 27.6
 -13 -9 -1 58.29 37.9
 -13 -9 -1 35.1 30
 13 9 1 68.99 33
 13 9 1 16.1 32.9
 13 9 1 71.89 39.6
 13 9 1 78.19 35.4
 -14 -9 -1 3.6 42.6
 -14 -9 -1 32.6 35.7
 -14 -9 -1 27.6 37.1
 -14 -9 -1 -19.4 35.9
 14 9 1 53.29 44.4
 14 9 1 -11.2 39.1
 14 9 1 101.29 39.7
 14 9 1 10.4 42.9
 -15 -9 -1 45.2 42.9
 -15 -9 -1 58.19 55.99
 -15 -9 -1 -25.4 35.3
 15 9 1 -4.2 43
 15 9 1 65.89 45.7
 15 9 1 -10.4 46
 15 9 1 -28 51.19
 -16 -9 -1 38.1 43.7
 -16 -9 -1 82.59 70.99
 -16 -9 -1 44.6 55.99
 16 9 1 -15.8 50.89
 16 9 1 128.29 64.49
 16 9 1 10.8 53.99
 16 9 1 -45.6 59.99
 10 -10 -1 20 57.59
 -10 10 1 85.29 64.29
 9 -10 -1 26.5 47.8
 -9 10 1 -35.6 47
 8 -10 -1 11.7 31.6
 8 -10 -1 -7.8 39.7
 8 -10 -1 32.3 43.5
 -8 10 1 6.7 39.6
 7 -10 -1 50.99 27.6
 7 -10 -1 54.19 39
 7 -10 -1 45.6 34
 -7 10 1 20.8 19.5
 -7 10 1 11.9 32.5
 6 -10 -1 235.08 44.6
 6 -10 -1 294.97 34
 6 -10 -1 160.08 31.7
 6 -10 -1 217.38 32.6
 6 -10 -1 219.88 32
 6 -10 -1 231.18 30.9
 6 -10 -1 335.67 39.7
 -6 10 1 223.08 28.8
 -6 10 1 200.78 37.9
 5 -10 -1 2.4 14.4
 5 -10 -1 21.2 20.2
 5 -10 -1 -12.6 30.1
 5 -10 -1 15.3 24
 5 -10 -1 -7 22.7
 5 -10 -1 77.29 22.6
 5 -10 -1 16.4 22.3
 5 -10 -1 65.39 26.2
 -5 10 1 2.1 21.1
 -5 10 1 50.19 22.1
 -5 10 1 35.2 24.8
 4 -10 -1 -0.1 22.8
 4 -10 -1 -40.3 19.6
 4 -10 -1 15.5 23.1
 4 -10 -1 -28.9 27.2
 4 -10 -1 17.7 19.6
 4 -10 -1 56.69 18.7
 4 -10 -1 -18.2 16.2
 -4 10 1 -15.6 20.6
 -4 10 1 -0.5 18.3
 -4 10 1 -5.3 21
 3 -10 -1 214.48 25.8
 3 -10 -1 225.08 31.3
 3 -10 -1 206.68 25.1
 3 -10 -1 274.47 30.8
 3 -10 -1 248.68 26.6
 3 -10 -1 228.68 28.2
 3 -10 -1 300.87 35.1
 -3 10 1 241.28 29.8
 -3 10 1 252.77 31.7
 -3 10 1 252.67 35.5
 2 -10 -1 292.17 25.2
 2 -10 -1 204.28 28.9
 2 -10 -1 203.08 30.6
 2 -10 -1 231.18 30.2
 2 -10 -1 280.17 26
 2 -10 -1 282.47 29.5
 2 -10 -1 224.18 23
 2 -10 -1 242.18 29.7
 -2 10 1 186.78 29.1
 -2 10 1 307.07 33.2
 -2 10 1 284.67 33.1
 1 -10 -1 186.78 25.3
 1 -10 -1 184.08 26
 1 -10 -1 199.98 27
 1 -10 -1 216.28 21.3
 1 -10 -1 182.78 19.9
 1 -10 -1 195.18 24.9
 1 -10 -1 174.18 20.9
 1 -10 -1 220.98 23.1
 -1 10 1 189.38 25.8
 -1 10 1 127.49 24.9
 -1 10 1 232.68 26.5
 -1 10 1 179.08 25.4
 0 -10 -1 222.08 28.2
 0 -10 -1 223.68 22.7
 0 -10 -1 206.78 27.2
 0 -10 -1 238.38 29.2
 0 -10 -1 204.08 18.3
 0 -10 -1 200.28 24.7
 0 -10 -1 204.78 22
 0 -10 -1 246.98 29.3
 0 10 1 200.68 27.3
 0 10 1 253.07 29
 0 10 1 229.18 28.1
 0 10 1 215.68 26.8
 -1 -10 -1 32.2 17.5
 -1 -10 -1 33.1 9
 -1 -10 -1 23.5 10.5
 -1 -10 -1 -18.2 15
 -1 -10 -1 -8.3 14.8
 -1 -10 -1 27.3 14.2
 1 10 1 11.7 13.1
 1 10 1 46.5 16
 1 10 1 27.1 17.4
 1 10 1 13.6 15.8
 -2 -10 -1 -2.8 12.9
 -2 -10 -1 -11.4 13.6
 -2 -10 -1 -30.2 20.7
 -2 -10 -1 33.5 15.7
 -2 -10 -1 -19 14.8
 -2 -10 -1 8.9 10.5
 2 10 1 -4 9.5
 2 10 1 -3.7 14.7
 2 10 1 -24.3 10.2
 2 10 1 -13 7
 2 10 1 -9.8 15.6
 2 10 1 -19 16.4
 2 10 1 10.8 11
 2 10 1 -14.3 11.9
 -3 -10 -1 579.44 56.69
 -3 -10 -1 614.84 51.39
 -3 -10 -1 695.03 50.39
 -3 -10 -1 689.63 51.39
 -3 -10 -1 758.22 48.6
 -3 -10 -1 734.13 52.09
 -3 -10 -1 680.53 48.9
 -3 -10 -1 701.13 52.89
 3 10 1 759.12 49.4
 3 10 1 716.93 48.2
 3 10 1 651.13 52.59
 3 10 1 707.53 49.6
 3 10 1 699.23 47.1
 3 10 1 561.64 52.59
 3 10 1 600.24 52.49
 -4 -10 -1 196.98 29.8
 -4 -10 -1 202.78 28.1
 -4 -10 -1 215.68 25.9
 -4 -10 -1 247.28 27.6
 -4 -10 -1 203.48 25.9
 -4 -10 -1 246.78 24.5
 -4 -10 -1 211.28 25.3
 -4 -10 -1 191.78 26.6
 4 10 1 215.98 30.8
 4 10 1 182.48 24.9
 4 10 1 242.58 23.2
 4 10 1 209.78 35.9
 4 10 1 222.28 21.8
 4 10 1 228.58 27.1
 4 10 1 204.78 25.1
 -5 -10 -1 181.28 21.5
 -5 -10 -1 118.29 19.3
 -5 -10 -1 184.58 25.6
 -5 -10 -1 165.88 22.6
 -5 -10 -1 162.68 22.1
 -5 -10 -1 221.28 25.6
 -5 -10 -1 214.08 26.1
 5 10 1 157.18 20.5
 5 10 1 158.88 21.5
 5 10 1 151.18 20.5
 5 10 1 156.28 34.7
 5 10 1 108.79 25.2
 5 10 1 139.69 21.4
 -6 -10 -1 106.09 18.5
 -6 -10 -1 104.49 22.8
 -6 -10 -1 113.09 19.2
 -6 -10 -1 77.79 16.7
 -6 -10 -1 107.99 20.7
 -6 -10 -1 118.09 18.9
 6 10 1 87.29 16.7
 6 10 1 122.49 19.4
 6 10 1 95.39 19.1
 6 10 1 92.49 17.2
 6 10 1 125.29 24.6
 6 10 1 74.29 18
 6 10 1 93.19 12.7
 6 10 1 71.29 12.8
 -7 -10 -1 89.69 18.3
 -7 -10 -1 78.69 20.8
 -7 -10 -1 116.69 20.6
 -7 -10 -1 85.39 19.2
 -7 -10 -1 63.19 24.2
 -7 -10 -1 80.29 24
 7 10 1 78.39 20.6
 7 10 1 79.09 19.1
 7 10 1 87.39 18.4
 7 10 1 99.19 20.4
 7 10 1 81.39 14
 7 10 1 85.29 13.7
 7 10 1 100.89 25.3
 7 10 1 96.19 25.3
 -8 -10 -1 221.08 28.8
 -8 -10 -1 222.98 28.8
 -8 -10 -1 186.78 28.8
 -8 -10 -1 290.57 31.4
 -8 -10 -1 177.18 32.9
 -8 -10 -1 237.38 27.9
 8 10 1 256.47 31.2
 8 10 1 167.78 31.9
 8 10 1 153.58 25.4
 8 10 1 245.48 25.7
 8 10 1 150.78 26.4
 8 10 1 255.57 34.1
 -9 -10 -1 237.48 33.3
 -9 -10 -1 163.48 25.8
 -9 -10 -1 261.87 45.5
 -9 -10 -1 193.88 31.5
 -9 -10 -1 242.28 32.7
 9 10 1 215.18 35.2
 9 10 1 196.08 32.5
 9 10 1 274.97 35.2
 9 10 1 224.08 31.3
 -10 -10 -1 30.8 27.3
 -10 -10 -1 80.59 23.6
 -10 -10 -1 80.79 27
 -10 -10 -1 59.39 24.2
 -10 -10 -1 52.29 22
 10 10 1 83.59 30.8
 10 10 1 100.19 32.3
 10 10 1 55.09 17.7
 10 10 1 72.29 24.8
 10 10 1 84.79 25.4
 -11 -10 -1 154.58 35.5
 -11 -10 -1 201.08 31.2
 -11 -10 -1 159.38 28.4
 -11 -10 -1 123.29 32.1
 -11 -10 -1 112.39 32.6
 11 10 1 132.89 31.3
 11 10 1 97.79 21
 11 10 1 55.69 31.4
 11 10 1 146.39 37.6
 11 10 1 153.58 32.3
 -12 -10 -1 24.5 25.3
 -12 -10 -1 63.59 43.3
 -12 -10 -1 8 29.7
 -12 -10 -1 8.1 36.2
 12 10 1 26.8 31.5
 12 10 1 2.7 29.4
 -13 -10 -1 10.1 28.7
 -13 -10 -1 -1.3 35.7
 -13 -10 -1 11.9 43.8
 -13 -10 -1 -22.4 31.5
 13 10 1 -11.3 39
 13 10 1 -1.6 34.4
 13 10 1 6.3 36.5
 13 10 1 -55.69 33
 -14 -10 -1 66.69 41.9
 -14 -10 -1 77.99 51.69
 -14 -10 -1 44.3 34.4
 -14 -10 -1 38.3 42.5
 14 10 1 85.49 49.5
 14 10 1 54.79 42.2
 14 10 1 90.89 43.5
 14 10 1 100.89 42.7
 -15 -10 -1 43.9 46.9
 -15 -10 -1 16.8 55.69
 -15 -10 -1 72.99 40.1
 15 10 1 20.5 55.99
 15 10 1 61.69 74.79
 15 10 1 40 48.7
 15 10 1 109.79 49
 -16 -10 -1 -82.09 53.39
 -16 -10 -1 90.69 48.2
 -16 -10 -1 22.9 71.19
 16 10 1 39.1 57.59
 16 10 1 18.6 62.79
 16 10 1 -45.3 57.79
 16 10 1 -11.5 54.59
 10 -11 -1 -165.38 72.09
 -10 11 1 20 73.69
 9 -11 -1 -35.1 59.29
 -9 11 1 19.5 54.29
 8 -11 -1 -11.4 43.4
 8 -11 -1 -4 51.99
 -8 11 1 -51.49 44.6
 7 -11 -1 -24.8 53.79
 7 -11 -1 -37.9 30.2
 7 -11 -1 -27.1 38.4
 -7 11 1 98.79 40.9
 6 -11 -1 25.6 28
 6 -11 -1 -13.2 39.6
 6 -11 -1 22.8 32.4
 -6 11 1 -38.3 31
 5 -11 -1 12.7 28.8
 5 -11 -1 1.2 26.5
 5 -11 -1 -27.9 21.9
 5 -11 -1 -14.5 30.8
 5 -11 -1 -66.79 34.9
 5 -11 -1 -23.8 24.8
 -5 11 1 15.5 29.7
 4 -11 -1 -50.49 23.5
 4 -11 -1 -34 20.7
 4 -11 -1 21.9 25.8
 4 -11 -1 -0.9 18.4
 4 -11 -1 2.4 22.6
 4 -11 -1 -0.5 32.8
 -4 11 1 -18.4 35.6
 -4 11 1 -32.4 23.8
 -4 11 1 8.1 23.5
 3 -11 -1 39.3 25.3
 3 -11 -1 33.6 23.1
 3 -11 -1 26.3 17.2
 3 -11 -1 23 21.2
 3 -11 -1 25 17.5
 -3 11 1 40.6 24.4
 -3 11 1 4.2 19.8
 -3 11 1 36.5 23.4
 2 -11 -1 0.7 20.3
 2 -11 -1 -2.1 13.3
 2 -11 -1 23.2 19.4
 2 -11 -1 27.3 18.9
 2 -11 -1 28.5 14.9
 2 -11 -1 30.5 12.5
 2 -11 -1 10.9 19.3
 -2 11 1 -17.6 23.4
 -2 11 1 -29.1 19
 -2 11 1 16.6 22
 -2 11 1 8.4 19.5
 1 -11 -1 38.4 13.8
 1 -11 -1 44.6 11.6
 1 -11 -1 31.2 9.7
 1 -11 -1 73.09 14.9
 1 -11 -1 44 20.8
 1 -11 -1 37.8 17.7
 1 -11 -1 56.49 21.8
 1 -11 -1 36.2 20
 -1 11 1 45.5 22.3
 -1 11 1 31.1 19.6
 -1 11 1 24.3 20.7
 -1 11 1 42 19.3
 0 -11 -1 209.98 25.1
 0 -11 -1 224.68 28.8
 0 -11 -1 238.28 29.4
 0 -11 -1 214.78 24.5
 0 -11 -1 211.58 20
 0 -11 -1 282.37 28.7
 0 11 1 245.38 31.4
 0 11 1 208.48 29.8
 0 11 1 248.28 30.5
 0 11 1 243.08 31.9
 -1 -11 -1 -1.3 17.2
 -1 -11 -1 -17 14.8
 -1 -11 -1 -2.5 11.3
 -1 -11 -1 11.9 22.5
 -1 -11 -1 15.9 9.8
 -1 -11 -1 -10.4 16.2
 -1 -11 -1 -6.9 16.9
 1 11 1 6.6 11.3
 1 11 1 -10.4 19.1
 1 11 1 14.7 18.1
 1 11 1 1.3 14.6
 -2 -11 -1 70.79 18.2
 -2 -11 -1 72.09 20.9
 -2 -11 -1 69.89 19.2
 -2 -11 -1 95.29 13.6
 -2 -11 -1 73.79 15.2
 -2 -11 -1 61.79 18
 2 11 1 72.29 17.5
 2 11 1 63.29 14.3
 2 11 1 74.79 13.5
 2 11 1 66.59 21.8
 2 11 1 42.6 13.1
 2 11 1 84.19 20.9
 -3 -11 -1 187.18 25.3
 -3 -11 -1 162.28 23.7
 -3 -11 -1 166.68 20.6
 -3 -11 -1 166.48 26
 -3 -11 -1 174.68 22.2
 -3 -11 -1 125.89 22.2
 3 11 1 156.38 20.4
 3 11 1 137.79 17.9
 3 11 1 191.08 25.7
 3 11 1 167.48 20.3
 3 11 1 169.88 20.2
 3 11 1 156.58 25.4
 -4 -11 -1 222.48 26.1
 -4 -11 -1 239.38 27.6
 -4 -11 -1 198.68 26.9
 -4 -11 -1 198.58 24.2
 -4 -11 -1 191.58 25.3
 -4 -11 -1 204.28 28.1
 4 11 1 219.78 30.6
 4 11 1 191.58 25.4
 4 11 1 164.98 23.7
 4 11 1 223.18 28.7
 4 11 1 159.68 22.4
 4 11 1 176.08 21
 -5 -11 -1 -31 19
 -5 -11 -1 15 14.8
 -5 -11 -1 -15.1 12.5
 -5 -11 -1 -10 14.5
 -5 -11 -1 11.1 17.1
 -5 -11 -1 11.6 15.1
 5 11 1 16.1 15.8
 5 11 1 -3.2 15.8
 5 11 1 16.2 12.8
 5 11 1 12.9 15.2
 5 11 1 10.3 21.4
 5 11 1 36.2 14.9
 -6 -11 -1 50.99 17.5
 -6 -11 -1 -12.4 21
 -6 -11 -1 2.9 14.1
 -6 -11 -1 3.4 17.6
 -6 -11 -1 6.9 15.4
 -6 -11 -1 16.3 17
 6 11 1 8.3 8.6
 6 11 1 -3.6 14.5
 6 11 1 12 17.6
 6 11 1 22.5 22.9
 6 11 1 14.4 16.7
 6 11 1 15.1 16.1
 6 11 1 28.7 17.1
 -7 -11 -1 26.1 17.4
 -7 -11 -1 25.1 24.2
 -7 -11 -1 28.2 19.1
 -7 -11 -1 24.5 26
 -7 -11 -1 13.1 16.1
 -7 -11 -1 42.6 20.7
 7 11 1 9.1 16.8
 7 11 1 25.3 22
 7 11 1 31.1 11.7
 7 11 1 45.2 12.4
 7 11 1 46 19.3
 7 11 1 35.3 18.1
 7 11 1 11.4 25.3
 -8 -11 -1 -9.8 20
 -8 -11 -1 2.4 20.4
 -8 -11 -1 -10.2 19.7
 -8 -11 -1 5 18.1
 -8 -11 -1 1 17.7
 8 11 1 -27.4 18.3
 8 11 1 13.2 18
 8 11 1 7.4 13.3
 8 11 1 -3.2 25.2
 8 11 1 14.1 13.1
 8 11 1 15.9 26.6
 -9 -11 -1 69.89 26.3
 -9 -11 -1 32.7 21.4
 -9 -11 -1 48.5 22.8
 -9 -11 -1 33.5 24.3
 -9 -11 -1 44.1 24.1
 9 11 1 60.09 18
 9 11 1 68.39 32.1
 9 11 1 34.7 17.2
 9 11 1 51.79 23.5
 9 11 1 42.2 21.7
 9 11 1 83.39 31.6
 -10 -11 -1 -19.9 21.7
 -10 -11 -1 -4 20.6
 -10 -11 -1 16.9 27.2
 -10 -11 -1 45.8 36.9
 -10 -11 -1 -4.5 24.4
 10 11 1 1.4 24.2
 10 11 1 8.9 30.7
 10 11 1 -5.5 18.2
 10 11 1 43.4 24.1
 10 11 1 -37.5 31.7
 10 11 1 33.8 19.2
 -11 -11 -1 29.2 47.3
 -11 -11 -1 -9.5 31.1
 -11 -11 -1 16.5 28.1
 -11 -11 -1 20.9 24.6
 -11 -11 -1 -12.2 33
 11 11 1 47.8 37.1
 11 11 1 60.09 39.4
 11 11 1 7.1 33.1
 11 11 1 24.3 22.3
 -12 -11 -1 4.8 33.7
 -12 -11 -1 2.7 34.4
 -12 -11 -1 53.69 29
 12 11 1 -10 31.9
 12 11 1 -6.9 32.9
 12 11 1 53.59 40.1
 12 11 1 -32.7 31.3
 -13 -11 -1 -17.1 46.9
 -13 -11 -1 -8.9 36.4
 -13 -11 -1 45.1 39.1
 -13 -11 -1 -29 30.5
 13 11 1 -73.79 40.6
 13 11 1 41.8 38.9
 13 11 1 23.5 46.6
 13 11 1 4.8 38.2
 -14 -11 -1 32.2 45.2
 -14 -11 -1 9.4 54.59
 -14 -11 -1 22.8 47.7
 -14 -11 -1 28 35.7
 14 11 1 -72.59 41.6
 14 11 1 24.9 45.2
 14 11 1 44.8 51.69
 14 11 1 -34.1 50.99
 -15 -11 -1 -30.9 47.4
 -15 -11 -1 -22.3 66.39
 -15 -11 -1 -71.09 41.4
 15 11 1 -41.5 63.39
 15 11 1 -48.1 63.39
 15 11 1 3.3 56.99
 15 11 1 4.5 53.09
 -16 -11 -1 117.89 76.19
 -16 -11 -1 -37.4 48
 -16 -11 -1 -44.5 60.59
 16 11 1 -62.99 66.09
 16 11 1 21.8 57.69
 16 11 1 -5.9 59.19
 16 11 1 -33 65.59
 9 -12 -1 18.4 69.69
 -9 12 1 39.6 68.59
 8 -12 -1 129.59 60.09
 -8 12 1 -54.59 53.69
 7 -12 -1 2.2 44.5
 7 -12 -1 -38.2 55.49
 -7 12 1 -21.5 43.9
 6 -12 -1 -23.7 49.8
 6 -12 -1 15.8 30.8
 6 -12 -1 45.7 38.6
 -6 12 1 10 37.9
 5 -12 -1 84.59 34.9
 5 -12 -1 71.39 43
 5 -12 -1 21.5 26.9
 -5 12 1 6.1 32
 4 -12 -1 17.8 39
 4 -12 -1 -9.5 22
 4 -12 -1 -13.7 30.7
 -4 12 1 3.9 29
 3 -12 -1 21.9 26.9
 3 -12 -1 28.9 20.1
 3 -12 -1 48.8 16.5
 3 -12 -1 64.19 21
 3 -12 -1 63.39 25.4
 -3 12 1 43.6 43.8
 -3 12 1 67.59 27.4
 2 -12 -1 -22.2 13
 2 -12 -1 0.5 16
 2 -12 -1 -3.6 23
 2 -12 -1 -10.9 20.1
 2 -12 -1 -14.6 11.6
 2 -12 -1 0.7 17
 2 -12 -1 36.3 21.6
 -2 12 1 2.7 23.3
 -2 12 1 3.9 45.3
 -2 12 1 22.2 25.5
 1 -12 -1 34 24.3
 1 -12 -1 22.1 16
 1 -12 -1 14.5 15.1
 1 -12 -1 49.4 20.2
 1 -12 -1 14.2 23.9
 -1 12 1 21 21.8
 -1 12 1 39.4 25.7
 -1 12 1 -27.5 22.6
 0 -12 -1 10 9.7
 0 -12 -1 -17.3 14.5
 0 -12 -1 -11.9 19.4
 0 -12 -1 -27.8 18.3
 0 -12 -1 -8.8 15.5
 0 12 1 16.9 19.5
 0 12 1 14.2 25.1
 -1 -12 -1 80.59 13.6
 -1 -12 -1 89.99 17.4
 -1 -12 -1 63.79 22
 -1 -12 -1 87.79 19.3
 -1 -12 -1 65.19 20.1
 -1 -12 -1 59.49 26.2
 1 12 1 66.09 25.5
 1 12 1 111.69 23.1
 1 12 1 64.89 15.1
 1 12 1 88.99 24.2
 -2 -12 -1 -27.8 17.4
 -2 -12 -1 12.7 21.1
 -2 -12 -1 -11.8 21.2
 -2 -12 -1 13.8 18.2
 -2 -12 -1 -2.5 13.9
 2 12 1 23 17.2
 2 12 1 17.9 13.1
 2 12 1 -14 20.8
 2 12 1 5.1 11.1
 2 12 1 10.6 22.4
 -3 -12 -1 40.2 19.7
 -3 -12 -1 9.6 14.9
 -3 -12 -1 33.2 20
 -3 -12 -1 10.3 14.6
 -3 -12 -1 3 21.2
 -3 -12 -1 17.1 19.3
 3 12 1 28.7 13.7
 3 12 1 12.5 15.6
 3 12 1 39.1 17.5
 3 12 1 9.3 16
 3 12 1 24.8 21.2
 3 12 1 39.8 26.4
 -4 -12 -1 86.19 23.8
 -4 -12 -1 95.19 18.9
 -4 -12 -1 64.59 20
 -4 -12 -1 91.89 18.8
 -4 -12 -1 106.29 25.4
 4 12 1 63.09 17.6
 4 12 1 69.29 19.3
 4 12 1 104.99 20.2
 4 12 1 73.89 18.3
 4 12 1 19.4 26.7
 4 12 1 70.39 13.9
 4 12 1 98.89 25.2
 -5 -12 -1 -8.8 15.3
 -5 -12 -1 8.3 15.9
 -5 -12 -1 -41.3 20.6
 -5 -12 -1 -6.4 17.1
 -5 -12 -1 12.7 21.1
 -5 -12 -1 2.1 19.6
 5 12 1 3.6 16.8
 5 12 1 18.4 25.1
 5 12 1 -36.7 17.8
 5 12 1 -14.9 12.8
 5 12 1 3.8 20.3
 5 12 1 -16 16.5
 -6 -12 -1 25.1 17.9
 -6 -12 -1 15.7 18.3
 -6 -12 -1 -1.1 23.4
 -6 -12 -1 -21.7 18.1
 -6 -12 -1 7.6 17.6
 -6 -12 -1 -10.1 19.2
 6 12 1 -12.4 14.8
 6 12 1 -12.3 25.4
 6 12 1 46.8 18.9
 6 12 1 20.3 20.4
 6 12 1 -41 19.5
 6 12 1 -14.6 20.6
 -7 -12 -1 8.8 17.9
 -7 -12 -1 36.4 27.4
 -7 -12 -1 -7.8 21.9
 -7 -12 -1 -1.2 20.7
 -7 -12 -1 6.1 18.8
 -7 -12 -1 -23 20.7
 7 12 1 6.8 10.3
 7 12 1 -12.8 27.2
 7 12 1 25.1 21.6
 7 12 1 19.6 20.4
 7 12 1 0.5 10.6
 7 12 1 7.5 18.2
 -8 -12 -1 0.7 21.6
 -8 -12 -1 34.5 25.2
 -8 -12 -1 0.4 19.8
 -8 -12 -1 -5.7 23.3
 -8 -12 -1 -1.6 23.5
 8 12 1 -29.7 20.8
 8 12 1 16.1 13.5
 8 12 1 16.6 14.2
 8 12 1 -21.6 21.1
 8 12 1 19.6 29.4
 -9 -12 -1 57.49 27.3
 -9 -12 -1 17.6 32.8
 -9 -12 -1 107.99 25.8
 -9 -12 -1 64.69 25
 -9 -12 -1 23.9 28
 9 12 1 42.6 17.8
 9 12 1 60.49 25.4
 9 12 1 47.4 33.6
 9 12 1 -4.6 32.4
 9 12 1 49.7 18.8
 9 12 1 56.89 26.7
 -10 -12 -1 27.8 30.4
 -10 -12 -1 85.89 32.2
 -10 -12 -1 56.69 28.6
 10 12 1 8.1 20.9
 10 12 1 44.5 35.4
 10 12 1 43.8 27.9
 10 12 1 64.49 21.4
 -11 -12 -1 22.2 30
 -11 -12 -1 23.9 27.3
 -11 -12 -1 41.8 43
 -11 -12 -1 -18.4 35.4
 -11 -12 -1 7 25.1
 11 12 1 6.7 29.8
 11 12 1 47.9 39.8
 11 12 1 -43 22.8
 11 12 1 46 36.3
 11 12 1 -44.9 28.1
 -12 -12 -1 23.8 29.4
 -12 -12 -1 -19 47.4
 -12 -12 -1 31.5 36.8
 -12 -12 -1 11.7 40.1
 12 12 1 14.6 43.3
 12 12 1 59.89 36
 12 12 1 11.9 37
 12 12 1 -68.79 37.6
 12 12 1 -3.6 27.1
 -13 -12 -1 17.1 39.1
 -13 -12 -1 44 54.49
 -13 -12 -1 -72.79 32.4
 -13 -12 -1 32 44.6
 13 12 1 60.59 39.7
 13 12 1 -13.9 31.9
 13 12 1 38.1 45.8
 13 12 1 -43.2 40.6
 13 12 1 1.9 48.2
 -14 -12 -1 -73.19 37.5
 -14 -12 -1 14.2 46.1
 -14 -12 -1 50.59 53.79
 -14 -12 -1 45.7 80.39
 14 12 1 -3 36.4
 14 12 1 47.2 48.5
 14 12 1 20.5 55.79
 14 12 1 150.68 52.59
 14 12 1 56.29 48.2
 -15 -12 -1 -79.09 68.19
 -15 -12 -1 47.2 58.79
 -15 -12 -1 7.9 44.2
 15 12 1 -97.99 52.09
 15 12 1 -74.49 62.29
 15 12 1 14.4 56.89
 15 12 1 -66.09 42.6
 15 12 1 -29.1 51.59
 -16 -12 -1 14 49.99
 -16 -12 -1 61.99 90.69
 16 12 1 3.1 60.49
 16 12 1 2.1 70.79
 16 12 1 -29 67.59
 8 -13 -1 -53.19 65.39
 -8 13 1 0 64.29
 7 -13 -1 114.59 56.89
 7 -13 -1 -13.7 54.59
 -7 13 1 13.5 51.79
 6 -13 -1 -83.19 69.99
 6 -13 -1 -47.5 33.9
 6 -13 -1 1.7 46.1
 -6 13 1 -18.4 42.1
 5 -13 -1 93.29 41.4
 5 -13 -1 3.7 44.8
 5 -13 -1 12.3 25.5
 5 -13 -1 61.89 32.5
 -5 13 1 41.4 39.2
 4 -13 -1 14.2 26
 4 -13 -1 2.7 54.89
 4 -13 -1 -31.6 20.9
 4 -13 -1 43.2 36.7
 -4 13 1 3.6 33.8
 3 -13 -1 -11.4 22.7
 3 -13 -1 28.3 34
 3 -13 -1 14 18.4
 -3 13 1 37.9 29.9
 2 -13 -1 -38.9 23.7
 2 -13 -1 13.5 13.4
 2 -13 -1 0.1 19.5
 2 -13 -1 -56.39 32.3
 -2 13 1 -25.5 27.2
 -2 13 1 73.99 31.5
 1 -13 -1 3.7 25.9
 1 -13 -1 -20.4 22.7
 1 -13 -1 26.9 19.3
 1 -13 -1 46.3 26.7
 1 -13 -1 6.4 16.2
 -1 13 1 -18.4 23.4
 -1 13 1 -3.8 29.5
 -1 13 1 -24 27
 0 -13 -1 -1.9 22.5
 0 -13 -1 15.2 17.3
 0 -13 -1 7.7 25.9
 0 -13 -1 -21.8 16.7
 0 13 1 11.7 23.1
 0 13 1 17.1 25.9
 0 13 1 -3.7 29.1
 -1 -13 -1 30.1 27.2
 -1 -13 -1 -19.5 17.3
 -1 -13 -1 3.5 27.1
 -1 -13 -1 -5.5 12.1
 -1 -13 -1 11.6 16.5
 -1 -13 -1 32.8 22.8
 1 13 1 -19.2 21
 1 13 1 -1.6 29
 1 13 1 13.8 25.5
 -2 -13 -1 53.69 17.8
 -2 -13 -1 19.8 21.1
 -2 -13 -1 76.39 24
 -2 -13 -1 69.39 33.7
 2 13 1 6.2 20.2
 2 13 1 29.6 15.8
 2 13 1 43.2 25.2
 2 13 1 86.29 28.6
 -3 -13 -1 259.27 30.9
 -3 -13 -1 216.68 30.9
 -3 -13 -1 225.98 34.9
 -3 -13 -1 234.48 29.3
 -3 -13 -1 295.27 38.5
 3 13 1 158.48 25.1
 3 13 1 203.88 25
 3 13 1 237.18 34
 3 13 1 156.08 34.1
 3 13 1 238.58 29.6
 -4 -13 -1 -0.9 23.1
 -4 -13 -1 -1.4 17.5
 -4 -13 -1 7.5 17.6
 -4 -13 -1 -14.2 22.7
 -4 -13 -1 43.7 26.2
 4 13 1 8.8 16.8
 4 13 1 29.9 20.1
 4 13 1 -11 22.9
 4 13 1 16.2 18.2
 4 13 1 20 28.4
 4 13 1 -10.6 13
 4 13 1 19.2 18
 -5 -13 -1 -7.5 18.6
 -5 -13 -1 -5 19.2
 -5 -13 -1 -19.7 17.9
 -5 -13 -1 -19.1 24.2
 -5 -13 -1 14.8 18.1
 -5 -13 -1 24.2 25.7
 5 13 1 -23.8 28.5
 5 13 1 23.8 19.1
 5 13 1 21 25.3
 5 13 1 35.4 18.6
 5 13 1 23.1 21.1
 5 13 1 15.4 15.2
 5 13 1 7.6 18.4
 -6 -13 -1 -29 20.3
 -6 -13 -1 -33.2 26.1
 -6 -13 -1 -24.9 19
 -6 -13 -1 11.8 18.7
 -6 -13 -1 20.8 26.9
 -6 -13 -1 12.2 23.2
 6 13 1 57.09 30.7
 6 13 1 -1.9 41.9
 6 13 1 -33.9 24
 6 13 1 -15.3 17.9
 6 13 1 1.7 22.1
 6 13 1 26.1 17.6
 6 13 1 16.9 24
 -7 -13 -1 -16.5 23.1
 -7 -13 -1 49 30.6
 -7 -13 -1 7.4 21.5
 -7 -13 -1 20.5 26.7
 -7 -13 -1 48.2 21.8
 -7 -13 -1 11.4 23
 7 13 1 38.6 34.3
 7 13 1 23.1 25.6
 7 13 1 -25.2 20.7
 7 13 1 19.1 19.9
 -8 -13 -1 -29.5 25.9
 -8 -13 -1 4.6 22.6
 -8 -13 -1 -1.4 22
 -8 -13 -1 4.2 28.6
 -8 -13 -1 -11.6 25.8
 8 13 1 25 25.8
 8 13 1 -53.39 22.8
 8 13 1 -26.2 32.3
 8 13 1 20.6 14
 -9 -13 -1 68.79 31
 -9 -13 -1 51.39 32.5
 -9 -13 -1 100.79 29.6
 -9 -13 -1 87.69 35
 9 13 1 42.6 37.2
 9 13 1 15.3 29.8
 9 13 1 44.9 27.9
 9 13 1 63.09 20.5
 -10 -13 -1 -10.4 37.4
 -10 -13 -1 14.8 30.7
 -10 -13 -1 60.49 34.2
 -10 -13 -1 26.8 26.7
 -10 -13 -1 14.5 28.4
 10 13 1 -29.6 39.9
 10 13 1 3 21.7
 10 13 1 -7.3 28.7
 10 13 1 -24.4 28.2
 10 13 1 -5.3 38.9
 -11 -13 -1 -40.1 40.1
 -11 -13 -1 -5 37.3
 -11 -13 -1 54.89 32.4
 -11 -13 -1 19 33.6
 -11 -13 -1 0.5 28.8
 11 13 1 1.5 36.1
 11 13 1 -1.4 40.5
 11 13 1 51.09 48.3
 11 13 1 -9.2 24.7
 11 13 1 51.39 34.2
 -12 -13 -1 -100.89 43.3
 -12 -13 -1 12.7 33.1
 -12 -13 -1 -3.9 36.2
 -12 -13 -1 137.09 48.3
 12 13 1 -6.2 36.3
 12 13 1 -37.3 36.4
 12 13 1 0.6 46.1
 12 13 1 39.1 29.3
 12 13 1 -3.9 47.6
 -13 -13 -1 -120.49 53.79
 -13 -13 -1 36.8 37.3
 -13 -13 -1 108.09 83.59
 -13 -13 -1 43.5 43.5
 13 13 1 55.89 42.6
 13 13 1 89.29 51.29
 13 13 1 23.5 42.5
 13 13 1 -13.8 53.29
 13 13 1 132.99 36
 -14 -13 -1 -24.6 42.9
 -14 -13 -1 69.99 69.59
 -14 -13 -1 -25.7 46.8
 14 13 1 54.29 68.79
 14 13 1 89.99 40.5
 14 13 1 -53.59 58.39
 14 13 1 55.69 49.3
 14 13 1 65.79 50.89
 -15 -13 -1 115.49 51.39
 -15 -13 -1 18.9 53.59
 -15 -13 -1 -138.09 74.29
 15 13 1 -81.19 68.89
 15 13 1 33.5 66.39
 15 13 1 48.3 56.49
 15 13 1 -58.19 45.8
 15 13 1 169.58 59.99
 7 -14 -1 5.4 71.49
 6 -14 -1 11.3 58.69
 6 -14 -1 46 55.89
 -6 14 1 53.89 51.19
 5 -14 -1 11.4 58.69
 5 -14 -1 52.09 47.6
 -5 14 1 4.3 43.7
 4 -14 -1 43.3 43.8
 4 -14 -1 10.4 50.39
 -4 14 1 14.5 39.3
 3 -14 -1 -23.7 38.4
 3 -14 -1 19.3 48.7
 3 -14 -1 -4.3 27.9
 -3 14 1 -1.9 49.1
 2 -14 -1 163.48 29.7
 2 -14 -1 158.38 45.2
 -2 14 1 158.78 38.5
 -2 14 1 130.39 41.1
 1 -14 -1 145.39 27.5
 1 -14 -1 119.69 58.69
 1 -14 -1 136.89 31.2
 -1 14 1 118.49 35.3
 -1 14 1 125.49 38.2
 0 -14 -1 83.79 40.4
 0 -14 -1 41.8 22.7
 0 -14 -1 74.39 33.3
 0 14 1 17.8 35.6
 0 14 1 60.99 34
 0 14 1 47.5 28.3
 -1 -14 -1 101.79 16
 -1 -14 -1 86.49 23.5
 -1 -14 -1 113.09 36.6
 -1 -14 -1 12.3 51.89
 -1 -14 -1 75.99 22.5
 1 14 1 71.29 32.5
 1 14 1 61.99 27.2
 1 14 1 78.59 35.5
 -2 -14 -1 17.4 35.1
 -2 -14 -1 12 19.6
 -2 -14 -1 -41.3 31.5
 -2 -14 -1 6.9 22.3
 2 14 1 1.5 17.6
 2 14 1 -3.7 23.3
 2 14 1 -15 27.2
 2 14 1 -3.7 30.8
 -3 -14 -1 59.99 20.2
 -3 -14 -1 79.09 26.3
 -3 -14 -1 93.89 22
 -3 -14 -1 101.49 41.4
 -3 -14 -1 19.3 29.6
 3 14 1 56.99 15
 3 14 1 97.79 24.9
 3 14 1 14.7 32
 3 14 1 51.19 20.3
 3 14 1 52.89 30.1
 -4 -14 -1 40.5 33.5
 -4 -14 -1 38.2 21.6
 -4 -14 -1 40.4 28.7
 -4 -14 -1 16.7 20.8
 -4 -14 -1 17.1 26.8
 4 14 1 -1.1 20.5
 4 14 1 29.2 28.1
 4 14 1 36.7 22.9
 4 14 1 18.2 18.6
 4 14 1 48.7 23.1
 4 14 1 -42.8 31.1
 -5 -14 -1 27.8 22.2
 -5 -14 -1 51.99 22.4
 -5 -14 -1 98.69 35.6
 -5 -14 -1 37 32.4
 -5 -14 -1 -26 28.7
 5 14 1 2.7 24.9
 5 14 1 -3.1 32.9
 5 14 1 -25.7 16.1
 5 14 1 71.79 22.5
 5 14 1 13.3 21.1
 5 14 1 32.7 28.5
 5 14 1 9.6 21.7
 -6 -14 -1 35.9 23.4
 -6 -14 -1 -6.9 23
 -6 -14 -1 -13.5 42.2
 -6 -14 -1 -0.1 30.8
 -6 -14 -1 20 32.1
 -6 -14 -1 0.8 21.8
 6 14 1 33 22.8
 6 14 1 -49.7 35
 6 14 1 25.7 29.5
 6 14 1 -34.2 18.9
 6 14 1 -2.9 20.8
 -7 -14 -1 78.39 36.6
 -7 -14 -1 -14.8 24.1
 -7 -14 -1 -27 25.7
 -7 -14 -1 54.59 25.5
 7 14 1 10.1 22.6
 7 14 1 1.3 23.9
 7 14 1 30.6 37.6
 7 14 1 74.79 38
 7 14 1 29.1 20.6
 -8 -14 -1 56.19 30.9
 -8 -14 -1 70.89 34.5
 -8 -14 -1 -12.3 30.8
 -8 -14 -1 19.9 49
 8 14 1 1.8 25.9
 8 14 1 45.6 28.9
 8 14 1 15.7 37.7
 8 14 1 18.1 20.7
 -9 -14 -1 10 31.9
 -9 -14 -1 49.2 34
 -9 -14 -1 -71.29 32.6
 -9 -14 -1 -2.3 26.9
 -9 -14 -1 -16 33.5
 9 14 1 -98.09 37.9
 9 14 1 -27 28
 9 14 1 -1.9 23
 9 14 1 -0.7 29.2
 -10 -14 -1 95.39 42.8
 -10 -14 -1 95.59 33
 -10 -14 -1 3.1 37.6
 -10 -14 -1 14.5 40
 -10 -14 -1 82.39 32.7
 10 14 1 87.29 37.6
 10 14 1 58.69 44.4
 10 14 1 73.69 26.1
 -11 -14 -1 -27.4 30.5
 -11 -14 -1 -38.2 45.8
 -11 -14 -1 10.2 38.4
 -11 -14 -1 55.19 50.09
 -11 -14 -1 -66.09 39.7
 11 14 1 -1.5 36.3
 11 14 1 15.5 57.49
 11 14 1 -33.2 43
 11 14 1 0.3 31.7
 11 14 1 50.19 49.1
 -12 -14 -1 87.59 54.79
 -12 -14 -1 139.59 69.79
 -12 -14 -1 104.89 38.8
 -12 -14 -1 32.6 43.3
 12 14 1 42.9 62.69
 12 14 1 115.79 45.3
 12 14 1 66.29 56.49
 12 14 1 -22.2 39.6
 -13 -14 -1 -75.79 39.8
 -13 -14 -1 12.8 59.59
 -13 -14 -1 76.79 49.2
 -13 -14 -1 22.6 62.89
 13 14 1 -135.69 53.69
 13 14 1 -11.1 47.8
 13 14 1 -35.3 45.9
 13 14 1 29 66.39
 -14 -14 -1 -119.29 64.49
 -14 -14 -1 6.1 44.7
 -14 -14 -1 13.6 54.59
 -14 -14 -1 35.6 73.19
 14 14 1 -18.6 49.8
 14 14 1 -19 63.39
 14 14 1 142.49 71.49
 14 14 1 101.49 55.39
 -15 -14 -1 78.39 54.19
 -15 -14 -1 -93.09 83.09
 15 14 1 -10.4 75.99
 15 14 1 158.08 64.29
 15 14 1 139.79 80.79
 5 -15 -1 72.09 63.89
 5 -15 -1 59.69 55.89
 -5 15 1 -29.1 50.79
 4 -15 -1 26.1 58.79
 4 -15 -1 3.1 49.1
 -4 15 1 31.7 47.7
 3 -15 -1 -36 54.39
 3 -15 -1 71.99 45.8
 -3 15 1 34 42.4
 2 -15 -1 -16.7 31.5
 2 -15 -1 2.4 41.4
 -2 15 1 -5.6 36.4
 -2 15 1 41.1 42.5
 1 -15 -1 -12 53.99
 1 -15 -1 44.2 27.9
 -1 15 1 18.8 34.4
 -1 15 1 -22.7 40.2
 0 -15 -1 -6.1 36
 0 -15 -1 51.19 25.9
 0 -15 -1 -9 37.7
 0 15 1 81.19 38.2
 0 15 1 -10.2 38.6
 -1 -15 -1 -38.6 35.2
 -1 -15 -1 20 24.2
 1 15 1 -0.8 30.4
 1 15 1 22.9 37.7
 -2 -15 -1 14.6 24.1
 -2 -15 -1 59.99 40.5
 -2 -15 -1 0.3 29.7
 2 15 1 -24.7 36
 2 15 1 -66.89 25.6
 2 15 1 -2.8 34.6
 -3 -15 -1 100.79 23
 -3 -15 -1 102.39 37.7
 -3 -15 -1 104.89 43.6
 -3 -15 -1 54.19 25.6
 3 15 1 127.79 36.7
 3 15 1 96.69 29.3
 3 15 1 65.89 40.9
 -4 -15 -1 49.4 24.4
 -4 -15 -1 43 48.3
 -4 -15 -1 115.99 38
 -4 -15 -1 86.39 27.2
 4 15 1 45.5 41.9
 4 15 1 108.49 28.9
 4 15 1 81.49 39.4
 -5 -15 -1 120.39 27.6
 -5 -15 -1 31.2 31.2
 -5 -15 -1 75.39 27.4
 5 15 1 56.69 26.4
 5 15 1 100.99 26
 5 15 1 49.6 45.6
 5 15 1 48.1 38.9
 -6 -15 -1 -20.3 25.5
 -6 -15 -1 39.9 30.5
 -6 -15 -1 62.39 40.5
 -6 -15 -1 -20.1 26.7
 6 15 1 10.2 35.3
 6 15 1 22.8 26.7
 6 15 1 55.99 40.9
 6 15 1 -30.1 22.7
 -7 -15 -1 8.9 39.3
 -7 -15 -1 25.1 29.3
 -7 -15 -1 18.9 30.6
 -7 -15 -1 17.7 29.1
 -7 -15 -1 25 31.1
 7 15 1 -7.5 33.4
 7 15 1 53.69 44
 7 15 1 3.8 23.2
 7 15 1 -17.8 27.5
 -8 -15 -1 65.89 31.6
 -8 -15 -1 62.89 43
 -8 -15 -1 28.7 29.4
 -8 -15 -1 -32.7 32.2
 -8 -15 -1 -3.6 32.7
 8 15 1 -22.6 23.1
 8 15 1 43.5 30.8
 8 15 1 69.29 47.1
 8 15 1 27.1 36.6
 -9 -15 -1 20.1 38.6
 -9 -15 -1 55.89 42.8
 -9 -15 -1 16.9 39.2
 -9 -15 -1 28 31.7
 -9 -15 -1 16.7 35.6
 9 15 1 41.8 33
 9 15 1 -2.9 47.7
 9 15 1 82.79 39.8
 -10 -15 -1 1 45.1
 -10 -15 -1 -74.19 42.2
 -10 -15 -1 11.6 35.2
 -10 -15 -1 37.8 50.99
 -10 -15 -1 28.1 68.79
 10 15 1 8.3 35.2
 10 15 1 -26.1 35.2
 10 15 1 -7.8 51.99
 -11 -15 -1 -73.29 53.29
 -11 -15 -1 53.89 53.99
 -11 -15 -1 38.7 35.9
 -11 -15 -1 -12.7 46.8
 11 15 1 -7.8 54.19
 11 15 1 93.29 41.2
 11 15 1 -24.3 41.5
 -12 -15 -1 49.2 61.59
 -12 -15 -1 70.79 41
 -12 -15 -1 -60.49 58.99
 -12 -15 -1 -74.39 52.29
 12 15 1 -17.8 59.29
 12 15 1 -33.2 42.7
 12 15 1 5.2 48.8
 -13 -15 -1 20.9 65.99
 -13 -15 -1 0.1 57.19
 -13 -15 -1 -115.39 97.19
 -13 -15 -1 -12.5 45.4
 13 15 1 -27.6 64.99
 13 15 1 62.29 55.69
 13 15 1 -80.89 49.2
 13 15 1 -20.8 64.39
 -14 -15 -1 -57.09 62.79
 -14 -15 -1 20.2 51.09
 -14 -15 -1 -91.09 80.99
 -14 -15 -1 -98.39 74.49
 14 15 1 -39 56.99
 14 15 1 14 81.29
 14 15 1 -47.4 58.09
 14 15 1 -93.29 70.89
 4 -16 -1 -23.4 69.99
 4 -16 -1 117.69 64.79
 -4 16 1 -27.6 54.09
 3 -16 -1 -45 62.39
 3 -16 -1 102.39 59.39
 -3 16 1 51.09 48.8
 2 -16 -1 -58.19 51.49
 -2 16 1 -14.2 40.7
 -2 16 1 35.4 62.49
 1 -16 -1 16.7 33.2
 1 -16 -1 -49.9 44.6
 -1 16 1 29.2 39.5
 0 -16 -1 101.59 42.5
 0 -16 -1 103.49 40.2
 0 -16 -1 124.39 34.3
 0 16 1 123.99 41.9
 -1 -16 -1 27.8 28.9
 -1 -16 -1 -20.6 36.8
 1 16 1 100.59 51.69
 -2 -16 -1 51.49 30.1
 -2 -16 -1 66.89 43.9
 -2 -16 -1 126.49 49.7
 2 16 1 118.89 43.4
 2 16 1 50.29 35
 -3 -16 -1 -7.5 33.7
 -3 -16 -1 92.99 30.5
 3 16 1 63.79 43.5
 3 16 1 63.89 32
 -4 -16 -1 -34.3 48.9
 -4 -16 -1 40.9 26.3
 -4 -16 -1 -8 28.9
 -4 -16 -1 -34.8 35.5
 4 16 1 15.9 30.3
 4 16 1 -45.1 38.5
 4 16 1 -29.7 47.2
 -5 -16 -1 12.1 38.4
 -5 -16 -1 6 28
 -5 -16 -1 37.1 54.29
 5 16 1 29.8 30.8
 5 16 1 20.3 44.7
 5 16 1 -15 36.6
 -6 -16 -1 39 44
 -6 -16 -1 9.1 31.4
 -6 -16 -1 -1.9 31
 -6 -16 -1 57.29 48.3
 6 16 1 9.2 38.3
 6 16 1 10.4 44.7
 6 16 1 11.2 29.3
 6 16 1 37.1 29.3
 -7 -16 -1 -18.6 33.6
 -7 -16 -1 11.6 45.8
 -7 -16 -1 0.6 48.9
 -7 -16 -1 -6.6 31.9
 7 16 1 27.3 41.8
 7 16 1 129.39 51.89
 7 16 1 18.8 28.5
 7 16 1 -9.5 30.4
 -8 -16 -1 18 37.5
 -8 -16 -1 -27.9 47.9
 -8 -16 -1 -3.5 52.09
 -8 -16 -1 14.6 37.1
 -8 -16 -1 54.49 33.3
 8 16 1 38.7 40.4
 8 16 1 14 51.29
 8 16 1 -19.7 46.9
 -9 -16 -1 -30.8 41.6
 -9 -16 -1 69.99 37.1
 -9 -16 -1 -19.2 53.99
 -9 -16 -1 62.49 52.69
 -9 -16 -1 -65.09 38.8
 9 16 1 5.1 55.49
 9 16 1 -33 36.4
 9 16 1 0.6 40.1
 -10 -16 -1 -32.8 47.6
 -10 -16 -1 -44.7 49.1
 -10 -16 -1 169.88 58.39
 -10 -16 -1 -54.69 58.29
 -10 -16 -1 74.29 39.5
 10 16 1 40.9 47.5
 10 16 1 70.39 40.9
 -11 -16 -1 2.7 62.29
 -11 -16 -1 -67.29 40.7
 -11 -16 -1 121.89 63.09
 11 16 1 36 48.5
 11 16 1 26.6 44
 11 16 1 132.09 65.69
 -12 -16 -1 96.69 47.2
 -12 -16 -1 15.8 69.79
 -12 -16 -1 -15.4 64.29
 -12 -16 -1 -116.39 65.69
 12 16 1 -42.1 70.49
 12 16 1 -15.1 47
 12 16 1 31.4 53.49
 -13 -16 -1 84.19 81.09
 -13 -16 -1 27.2 49.99
 -13 -16 -1 -117.49 73.19
 -13 -16 -1 -98.59 74.19
 13 16 1 -2.4 60.49
 13 16 1 27.9 78.19
 13 16 1 75.79 57.09
 2 -17 -1 52.39 60.09
 -2 17 1 82.79 52.89
 1 -17 -1 51.89 57.99
 -1 17 1 109.59 60.59
 -1 17 1 108.29 49.8
 0 -17 -1 6.3 40.1
 0 -17 -1 -48.2 73.19
 0 17 1 19.9 53.59
 0 17 1 17.3 44.5
 -1 -17 -1 -78.69 37
 -1 -17 -1 -31.3 49.1
 -1 -17 -1 2.3 48.5
 1 17 1 13.8 41.6
 1 17 1 -50.59 51.39
 -2 -17 -1 -39.5 35.4
 -2 -17 -1 37.1 43
 2 17 1 38.9 40
 2 17 1 19.2 48.6
 -3 -17 -1 -55.39 60.49
 -3 -17 -1 2.6 55.79
 -3 -17 -1 -68.49 41.2
 3 17 1 32.3 38.4
 3 17 1 1.8 46.4
 -4 -17 -1 60.29 59.49
 -4 -17 -1 -33.7 44.3
 -4 -17 -1 -53.09 33.3
 4 17 1 -5 35.1
 4 17 1 35 44.7
 -5 -17 -1 155.48 44.2
 -5 -17 -1 83.69 50.19
 -5 -17 -1 196.18 62.59
 5 17 1 173.58 38.5
 5 17 1 164.08 52.19
 -6 -17 -1 7.1 36.7
 -6 -17 -1 67.69 49.7
 -6 -17 -1 -149.88 58.99
 -6 -17 -1 80.19 36.4
 6 17 1 13.4 46.9
 6 17 1 -15.5 32.6
 -7 -17 -1 48 53.79
 -7 -17 -1 43.3 42
 -7 -17 -1 4.4 36.9
 -7 -17 -1 66.89 58.59
 7 17 1 -69.79 53.59
 7 17 1 30.3 43.9
 -8 -17 -1 -22.3 58.29
 -8 -17 -1 22.7 43.7
 -8 -17 -1 -0.2 38.9
 -8 -17 -1 67.69 61.19
 8 17 1 3.2 58.99
 8 17 1 53.69 52.29
 8 17 1 49.3 38.3
 -9 -17 -1 -44.2 62.09
 -9 -17 -1 19.8 40.8
 -9 -17 -1 24.2 60.59
 9 17 1 -47.5 40.8
 9 17 1 -62.39 61.49
 9 17 1 42.5 53.29
 -10 -17 -1 84.29 69.59
 -10 -17 -1 66.79 44.5
 -10 -17 -1 -85.59 69.09
 -10 -17 -1 67.89 55.39
 10 17 1 83.69 52.29
 10 17 1 48.8 70.19
 10 17 1 -26.4 45.7
 -11 -17 -1 -57.09 75.49
 -11 -17 -1 149.88 74.59
 -11 -17 -1 64.49 46.7
 -11 -17 -1 -6.5 82.49
 11 17 1 97.49 51.09
 11 17 1 19.3 58.99
 11 17 1 57.39 73.69
 -12 -17 -1 -129.69 79.19
 -12 -17 -1 172.38 79.59
 -12 -17 -1 -78.99 76.79
 -12 -17 -1 73.69 52.39
 12 17 1 60.39 80.69
 12 17 1 -46.3 53.49
 12 17 1 -22 62.09
 0 -18 -1 -58.19 58.59
 0 18 1 -66.29 71.89
 0 18 1 37.2 53.99
 -1 -18 -1 49.8 61.29
 1 18 1 80.59 51.39
 1 18 1 -70.29 61.39
 -2 -18 -1 -55.79 42.2
 -2 -18 -1 32.6 54.99
 2 18 1 44.7 47.2
 2 18 1 -63.29 57.49
 -3 -18 -1 192.18 69.59
 -3 -18 -1 71.19 61.29
 -3 -18 -1 19.4 42.2
 3 18 1 1 45.8
 3 18 1 45.9 59.09
 -4 -18 -1 0.4 41.7
 -4 -18 -1 -97.39 68.39
 -4 -18 -1 55.09 55.29
 4 18 1 -35.1 42.9
 4 18 1 81.99 57.99
 -5 -18 -1 33.5 42.3
 -5 -18 -1 -140.89 55.89
 -5 -18 -1 -2.6 66.49
 5 18 1 26.5 54.89
 5 18 1 -10.3 49.4
 -6 -18 -1 -55.89 57.49
 -6 -18 -1 -8.3 68.79
 -6 -18 -1 -39.2 41.6
 6 18 1 -22.5 55.89
 -7 -18 -1 -80.39 69.49
 -7 -18 -1 -150.58 60.59
 -7 -18 -1 72.99 45.5
 7 18 1 82.39 59.69
 -8 -18 -1 55.09 69.69
 -8 -18 -1 35.7 45.7
 -8 -18 -1 109.99 75.29
 8 18 1 118.69 58.09
 -9 -18 -1 49.9 74.39
 -9 -18 -1 -21.1 46.6
 -9 -18 -1 143.59 79.89
 9 18 1 12.9 57.49
 -10 -18 -1 97.69 81.69
 -10 -18 -1 210.18 83.99
 -10 -18 -1 31.7 50.59
 10 18 1 -66.89 67.79
 10 18 1 -123.69 80.79
 10 18 1 10.9 65.19
 -5 -19 -1 -6.8 59.29
 -5 -19 -1 -58.59 76.89
 -5 -19 -1 6.3 50.19
 5 19 1 108.19 65.99
 -6 -19 -1 86.99 74.59
 -6 -19 -1 150.38 53.09
 -6 -19 -1 -30.6 84.99
 6 19 1 -39.6 62.49
 10 18 -2 -7.7 64.79
 -10 -18 2 -49.3 46.7
 -10 -18 2 94.29 80.19
 -10 -18 2 31.2 48.8
 9 18 -2 -62.89 58.59
 -9 -18 2 -38.5 49.9
 -9 -18 2 0.8 47.5
 -9 -18 2 114.79 77.49
 -9 -18 2 4.7 56.79
 8 18 -2 65.59 63.69
 -8 -18 2 -29.6 44.4
 -8 -18 2 61.09 51.29
 -8 -18 2 1.7 70.59
 -8 -18 2 42.5 54.29
 7 18 -2 26.7 54.79
 -7 -18 2 89.49 68.69
 -7 -18 2 -31.2 46.2
 -7 -18 2 -20.8 41.8
 6 18 -2 74.79 58.09
 -6 -18 2 17.2 41
 -6 -18 2 -109.39 62.99
 -6 -18 2 -51.39 45.1
 -6 -18 2 8.1 44.5
 5 18 -2 47.3 50.99
 -5 -18 2 47 39.4
 -5 -18 2 90.69 107.39
 -5 -18 2 -5 51.39
 4 18 -2 7.5 55.59
 -4 -18 2 35.4 69.89
 -4 -18 2 -10.3 56.79
 -4 -18 2 -22 37.2
 3 18 -2 -115.29 63.59
 3 18 -2 12.7 54.39
 -3 -18 2 -21.1 56.59
 -3 -18 2 -63.09 54.19
 -3 -18 2 18.2 47.6
 2 18 -2 71.79 56.49
 2 18 -2 26.2 61.79
 -2 -18 2 15.6 49.7
 1 18 -2 105.99 60.29
 1 18 -2 67.39 70.89
 -1 -18 2 157.78 62.69
 12 17 -2 64.79 63.89
 12 17 -2 23.5 90.29
 -12 -17 2 -21.2 75.39
 -12 -17 2 -71.99 75.89
 -12 -17 2 -26 49.3
 11 17 -2 42.1 61.79
 11 17 -2 -51.39 46.6
 11 17 -2 -49.5 70.59
 -11 -17 2 23.7 73.69
 -11 -17 2 -80.19 57.89
 -11 -17 2 -24.7 46.1
 -11 -17 2 -15.8 42.2
 10 17 -2 29.9 54.39
 10 17 -2 -84.59 78.59
 -10 -17 2 102.29 47.3
 -10 -17 2 48.8 56.89
 -10 -17 2 -35.5 37.2
 -10 -17 2 -45.1 63.49
 9 17 -2 -94.29 53.69
 9 17 -2 16.7 52.99
 9 17 -2 -98.69 57.79
 -9 -17 2 -11.9 38.4
 -9 -17 2 -51.39 36.7
 -9 -17 2 -46 48.4
 -9 -17 2 51.89 61.29
 8 17 -2 35.4 49.7
 -8 -17 2 -36.2 47.1
 -8 -17 2 33.2 37.3
 -8 -17 2 11.4 57.29
 -8 -17 2 44.9 43.2
 7 17 -2 17.6 46.2
 -7 -17 2 -67.19 54.19
 -7 -17 2 15.3 40.5
 -7 -17 2 -8.8 40.3
 -7 -17 2 35.7 37.4
 6 17 -2 84.19 50.49
 -6 -17 2 42.7 38.6
 -6 -17 2 63.39 37
 -6 -17 2 44 36
 -6 -17 2 -14.7 53.19
 5 17 -2 145.99 46.6
 -5 -17 2 1.7 42.7
 -5 -17 2 48.6 55.19
 -5 -17 2 -27.4 33.1
 -5 -17 2 -26.7 40.6
 4 17 -2 34.5 45.4
 4 17 -2 -30.4 33.8
 -4 -17 2 15 44.3
 -4 -17 2 -62.29 31.8
 -4 -17 2 57.49 35.3
 -4 -17 2 60.09 53.29
 3 17 -2 -13.2 46.7
 3 17 -2 23 38.7
 -3 -17 2 25.9 31.8
 -3 -17 2 31.3 49
 -3 -17 2 40.7 58.69
 2 17 -2 -12.2 45.4
 2 17 -2 -33.3 38.6
 -2 -17 2 -33.3 31.1
 -2 -17 2 -39.7 42
 1 17 -2 -3.3 42.4
 1 17 -2 88.69 60.39
 -1 -17 2 93.69 53.69
 -1 -17 2 -16.1 32
 0 17 -2 -39.9 43.6
 0 17 -2 87.49 52.89
 0 -17 2 124.09 59.19
 -1 17 -2 67.29 69.59
 1 -17 2 18.8 52.99
 -2 17 -2 90.49 77.99
 2 -17 2 -98.89 53.99
 2 -17 2 12.3 69.79
 13 16 -2 14.9 82.39
 13 16 -2 -49 73.59
 13 16 -2 61.79 56.59
 13 16 -2 -21.6 53.39
 -13 -16 2 -71.89 48.2
 -13 -16 2 -93.19 72.39
 -13 -16 2 21.5 48.6
 -13 -16 2 88.39 68.59
 -13 -16 2 -14.1 60.99
 12 16 -2 -78.49 66.69
 12 16 -2 47.2 49
 12 16 -2 96.19 55.29
 -12 -16 2 -13.1 41.8
 -12 -16 2 -40.9 62.89
 -12 -16 2 18.9 60.19
 -12 -16 2 43 45.3
 -12 -16 2 113.29 68.09
 11 16 -2 79.69 64.79
 11 16 -2 2.6 43.5
 11 16 -2 31.5 51.69
 -11 -16 2 24.2 60.09
 -11 -16 2 40.6 52.59
 -11 -16 2 142.89 43.7
 -11 -16 2 4.6 37.3
 -11 -16 2 -16.7 53.49
 10 16 -2 14.4 44.1
 10 16 -2 5 49.6
 10 16 -2 44 56.69
 -10 -16 2 5.1 47.6
 -10 -16 2 -50.79 33.9
 -10 -16 2 63.99 47.4
 -10 -16 2 16 54.69
 -10 -16 2 -13.1 38.5
 9 16 -2 41.1 34.2
 9 16 -2 52.09 53.39
 9 16 -2 25.9 46.3
 -9 -16 2 -76.99 49.8
 -9 -16 2 37.5 40.2
 -9 -16 2 35.5 42.3
 -9 -16 2 -40 33.2
 -9 -16 2 -8.5 30.8
 8 16 -2 19.3 31
 8 16 -2 43.5 42.8
 8 16 -2 3 47.3
 -8 -16 2 -6.4 34.8
 -8 -16 2 21.3 50.09
 -8 -16 2 -1.4 30.3
 -8 -16 2 -13 39.6
 -8 -16 2 66.59 33.3
 7 16 -2 43.2 43.3
 7 16 -2 -30.7 45.3
 7 16 -2 58.19 28.8
 -7 -16 2 62.99 46.6
 -7 -16 2 12.7 33.8
 -7 -16 2 82.29 36.6
 -7 -16 2 10.3 29.6
 6 16 -2 46.2 36.5
 6 16 -2 54.09 44.5
 6 16 -2 -2.9 40.3
 -6 -16 2 7.4 29.4
 -6 -16 2 -65.79 31
 -6 -16 2 70.79 47.9
 5 16 -2 170.98 45.1
 5 16 -2 148.29 31.6
 -5 -16 2 50.79 38.1
 -5 -16 2 44.6 32.8
 -5 -16 2 106.59 47.3
 -5 -16 2 163.38 32.5
 4 16 -2 37.9 30.1
 4 16 -2 31.4 43.2
 -4 -16 2 -8 28.8
 -4 -16 2 -42.1 30.2
 -4 -16 2 1.3 25.6
 -4 -16 2 -12.5 49.5
 3 16 -2 6.2 31
 3 16 -2 44.8 41.1
 -3 -16 2 35 26.5
 -3 -16 2 104.19 38.6
 -3 -16 2 14.7 42.4
 -3 -16 2 -13.3 25.4
 2 16 -2 56.29 40.2
 2 16 -2 3 39.7
 -2 -16 2 14.3 36.9
 -2 -16 2 19.5 39.1
 -2 -16 2 52.39 26.7
 -2 -16 2 -0.4 25
 1 16 -2 45.3 35.9
 1 16 -2 75.59 40.8
 -1 -16 2 41.3 45.8
 -1 -16 2 53.09 27.1
 0 16 -2 66.49 39.9
 0 16 -2 75.19 40.2
 0 -16 2 169.78 50.09
 0 -16 2 -1.3 27
 -1 16 -2 76.59 42.2
 -1 16 -2 77.39 44.7
 1 -16 2 -7.5 47.9
 -2 16 -2 -2.7 62.29
 2 -16 2 -12 59.59
 2 -16 2 -78.49 44.7
 -3 16 -2 92.99 72.19
 3 -16 2 15.9 61.59
 3 -16 2 16.8 51.19
 -4 16 -2 -173.28 75.49
 4 -16 2 51.79 65.99
 4 -16 2 49.6 58.09
 14 15 -2 -24.2 55.59
 14 15 -2 11.1 60.79
 14 15 -2 -49.9 87.19
 14 15 -2 59.59 74.99
 -14 -15 2 165.68 78.39
 -14 -15 2 48.8 68.19
 -14 -15 2 32.8 46.7
 -14 -15 2 73.99 57.49
 -14 -15 2 7.1 49.2
 13 15 -2 95.39 51.49
 13 15 -2 -46 73.29
 13 15 -2 -23.4 64.29
 13 15 -2 -45.6 52.79
 -13 -15 2 -10.3 65.59
 -13 -15 2 17.3 52.99
 -13 -15 2 48.6 43.5
 -13 -15 2 -7.9 52.09
 -13 -15 2 75.79 43.9
 12 15 -2 20.2 44.5
 12 15 -2 78.09 44.6
 12 15 -2 48.9 67.09
 12 15 -2 20.6 58.59
 -12 -15 2 -15.7 46.7
 -12 -15 2 -3.1 37.2
 -12 -15 2 111.09 60.39
 -12 -15 2 49.4 40.4
 -12 -15 2 33 52.69
 11 15 -2 117.09 46.2
 11 15 -2 -38.4 62.99
 11 15 -2 108.79 39.7
 -11 -15 2 60.39 35.6
 -11 -15 2 -31.7 47
 -11 -15 2 -69.79 42.8
 -11 -15 2 37 49.6
 -11 -15 2 -11 35.6
 10 15 -2 14.2 36.3
 10 15 -2 -56.59 46.6
 10 15 -2 24.2 37.4
 -10 -15 2 31.5 42.9
 -10 -15 2 68.49 41
 -10 -15 2 -32.3 44
 -10 -15 2 -5.5 31
 -10 -15 2 -27 32.5
 9 15 -2 -44.1 37
 9 15 -2 -24.5 45.2
 9 15 -2 34.6 31.5
 -9 -15 2 8.5 35.3
 -9 -15 2 13.7 29.1
 -9 -15 2 22.1 41
 -9 -15 2 -4.8 26.8
 8 15 -2 -31.8 27.2
 8 15 -2 -37.3 40.6
 8 15 -2 -0.2 34.2
 -8 -15 2 23.3 27.5
 -8 -15 2 26.5 31.7
 -8 -15 2 -19.9 33.6
 -8 -15 2 14.5 30.7
 -8 -15 2 -42.4 39.1
 7 15 -2 -53.49 24.7
 7 15 -2 16.1 35.4
 7 15 -2 -63.39 37.3
 -7 -15 2 39.3 39.7
 -7 -15 2 10.9 31.2
 -7 -15 2 -26.7 24.4
 -7 -15 2 2.3 29.7
 6 15 -2 -40.1 22.1
 6 15 -2 -59.69 52.49
 6 15 -2 -35.2 36.8
 6 15 -2 -10.7 21.7
 -6 -15 2 37.4 41.6
 -6 -15 2 20.3 26
 -6 -15 2 3.6 24.1
 -6 -15 2 43.8 30.2
 -6 -15 2 -30.1 21.3
 5 15 -2 29.8 37.6
 5 15 -2 21.5 23.2
 5 15 -2 -4.3 33
 -5 -15 2 -9.7 27
 -5 -15 2 4.3 37.9
 -5 -15 2 30.5 23.2
 -5 -15 2 18.3 26.3
 4 15 -2 86.89 34.7
 4 15 -2 120.29 38.9
 4 15 -2 116.29 28.4
 -4 -15 2 130.79 25.9
 -4 -15 2 196.28 41
 -4 -15 2 80.69 27.2
 -4 -15 2 106.29 29.3
 3 15 -2 35.4 34.3
 3 15 -2 11.5 26.7
 3 15 -2 24.2 31.1
 -3 -15 2 36.7 22.2
 -3 -15 2 59.09 27.8
 -3 -15 2 18.1 24.1
 -3 -15 2 99.39 36.3
 2 15 -2 13.6 28.6
 2 15 -2 8 31.5
 -2 -15 2 62.29 35.2
 -2 -15 2 10.3 22.2
 -2 -15 2 70.89 34.5
 -2 -15 2 50.49 22
 1 15 -2 9.2 30
 1 15 -2 -22.4 31.9
 -1 -15 2 -22.7 28.7
 -1 -15 2 42.1 20.9
 -1 -15 2 24 22.3
 0 15 -2 43.4 34.5
 0 15 -2 11 31.7
 0 -15 2 75.49 34.1
 0 -15 2 -3 21.4
 0 -15 2 19.9 20.9
 -1 15 -2 19.3 33.6
 -1 15 -2 12.9 36.5
 1 -15 2 9.9 22.1
 1 -15 2 63.89 40.3
 -2 15 -2 28.4 36.6
 -2 15 -2 -42.9 37.7
 2 -15 2 -36.1 37.2
 -3 15 -2 4.5 58.79
 3 -15 2 15.8 51.49
 3 -15 2 -44.1 40.4
 -4 15 -2 30.6 65.89
 4 -15 2 35.7 48.1
 4 -15 2 32.5 55.59
 -5 15 -2 140.29 79.59
 5 -15 2 89.09 55.79
 5 -15 2 14.4 60.89
 14 14 -2 31.2 55.79
 14 14 -2 7.5 64.59
 14 14 -2 -46.4 74.39
 14 14 -2 78.99 56.79
 -14 -14 2 38.3 54.59
 -14 -14 2 20.8 43.3
 -14 -14 2 18.6 74.29
 -14 -14 2 -48 50.39
 -14 -14 2 -95.19 43.5
 13 14 -2 -9.7 56.09
 13 14 -2 58.09 46.4
 13 14 -2 -9.1 71.29
 13 14 -2 -36.8 47.2
 -13 -14 2 0.5 38.3
 -13 -14 2 24.5 47.9
 -13 -14 2 -112.29 71.99
 -13 -14 2 -30.4 39.1
 -13 -14 2 -29.3 45.6
 12 14 -2 -1.2 50.19
 12 14 -2 2.7 40.8
 12 14 -2 68.29 62.49
 12 14 -2 -9.6 38.9
 -12 -14 2 27.6 51.09
 -12 -14 2 -33.5 33.8
 -12 -14 2 -43.5 38.8
 -12 -14 2 9 54.09
 -12 -14 2 11.7 32.1
 11 14 -2 80.49 58.59
 11 14 -2 33.9 36.3
 11 14 -2 1.8 34.3
 11 14 -2 -1.4 55.19
 -11 -14 2 87.79 32.3
 -11 -14 2 69.69 39.3
 -11 -14 2 -7.3 38.3
 -11 -14 2 -5.8 29.2
 -11 -14 2 3.7 44
 10 14 -2 -62.59 40.5
 10 14 -2 24 31.7
 10 14 -2 1.9 31.2
 10 14 -2 113.59 56.49
 -10 -14 2 -72.99 33.3
 -10 -14 2 11 37
 -10 -14 2 -0.9 35
 -10 -14 2 0.9 27.7
 -10 -14 2 39.3 27.9
 9 14 -2 21.7 27.6
 9 14 -2 15.4 32.1
 9 14 -2 -21.1 37.6
 9 14 -2 -13.4 22.1
 -9 -14 2 -13.2 25.4
 -9 -14 2 12.5 32.4
 -9 -14 2 56.29 33.4
 -9 -14 2 -11 33.4
 -9 -14 2 14.2 24.1
 8 14 -2 7.8 27.6
 8 14 -2 40.7 36.4
 8 14 -2 32 26
 8 14 -2 24.4 37.9
 -8 -14 2 39.1 35.3
 -8 -14 2 73.99 28.2
 -8 -14 2 -5.9 29.1
 -8 -14 2 -9.4 42.4
 -8 -14 2 13.8 25.8
 7 14 -2 28.3 34.3
 7 14 -2 21.9 34.1
 7 14 -2 7.6 23.9
 7 14 -2 57.79 23.7
 -7 -14 2 19.7 35.9
 -7 -14 2 -6 21.3
 -7 -14 2 17.6 27.5
 -7 -14 2 6.9 23.5
 -7 -14 2 50.69 31
 6 14 -2 -13.5 20
 6 14 -2 -19.6 22
 6 14 -2 -14.8 32.2
 6 14 -2 -20.7 22
 6 14 -2 29.8 18.3
 6 14 -2 20.2 27
 -6 -14 2 11.6 29.8
 -6 -14 2 -12.3 31.5
 -6 -14 2 -4.7 25.4
 -6 -14 2 -23.8 19.9
 -6 -14 2 9.1 20.8
 5 14 -2 -23.7 31.2
 5 14 -2 7.5 18.7
 5 14 -2 -24.8 25.9
 5 14 -2 57.79 20.5
 5 14 -2 4.1 18.5
 5 14 -2 44.2 20.2
 -5 -14 2 13.5 28.4
 -5 -14 2 49.99 30.1
 -5 -14 2 37.8 23.8
 -5 -14 2 -14.5 19.1
 -5 -14 2 28.3 19.3
 4 14 -2 -6.7 20.6
 4 14 -2 -6.5 25.6
 4 14 -2 -1.2 28.7
 -4 -14 2 -45.1 17.6
 -4 -14 2 -11.5 21.6
 -4 -14 2 -41.7 27.7
 -4 -14 2 32.8 27.7
 3 14 -2 -4.1 24.4
 3 14 -2 -67.79 29.2
 3 14 -2 -32.3 21.9
 3 14 -2 -28.7 25.7
 -3 -14 2 2.5 20
 -3 -14 2 6.6 29.2
 -3 -14 2 -7.8 17.7
 -3 -14 2 -17.3 25.1
 2 14 -2 0 24.1
 2 14 -2 9.5 24.8
 2 14 -2 18.4 27.4
 2 14 -2 13.8 26.8
 -2 -14 2 67.79 29.9
 -2 -14 2 32.1 23.8
 -2 -14 2 -16.4 19.6
 -2 -14 2 4.2 17.1
 1 14 -2 -2.3 25.4
 1 14 -2 -14.4 27.3
 1 14 -2 45.8 28.6
 -1 -14 2 28.5 17.5
 -1 -14 2 35.3 26.3
 -1 -14 2 7.8 28.6
 -1 -14 2 24.7 22
 -1 -14 2 21.2 21.4
 -1 -14 2 2.5 19.1
 0 14 -2 54.49 29.3
 0 14 -2 105.89 30.4
 0 -14 2 31.4 19.3
 0 -14 2 51.29 18.1
 -1 14 -2 37 31.5
 -1 14 -2 87.69 32.7
 1 -14 2 41 18.3
 1 -14 2 48.3 20.3
 -2 14 -2 14.9 43.8
 -2 14 -2 17.3 32.1
 2 -14 2 -8.5 19.5
 2 -14 2 12.2 21
 2 -14 2 91.39 65.19
 -3 14 -2 42.8 35.1
 3 -14 2 -66.79 38.3
 -4 14 -2 -43.9 56.69
 4 -14 2 19.7 57.29
 4 -14 2 23.3 40
 -5 14 -2 52.99 62.89
 5 -14 2 79.89 46.3
 5 -14 2 14.4 52.59
 -6 14 -2 -76.19 68.49
 6 -14 2 41.4 52.39
 6 -14 2 44.5 60.89
 15 13 -2 65.49 58.99
 15 13 -2 34.3 73.49
 15 13 -2 -133.49 65.59
 15 13 -2 62.49 60.29
 -15 -13 2 -91.99 58.29
 -15 -13 2 1.7 44.8
 -15 -13 2 0.9 56.99
 -15 -13 2 -52.59 47.6
 -15 -13 2 -46 70.19
 14 13 -2 37.3 49.99
 14 13 -2 11.4 57.49
 14 13 -2 47.4 64.39
 14 13 -2 54.59 54.09
 -14 -13 2 -3.2 48.1
 -14 -13 2 8.6 47.4
 -14 -13 2 -49 59.89
 -14 -13 2 35.2 40.9
 -14 -13 2 44.9 42.5
 13 13 -2 -31.6 50.39
 13 13 -2 -0.9 41.8
 13 13 -2 -5.1 63.99
 13 13 -2 -59.49 42
 -13 -13 2 -17.5 33.9
 -13 -13 2 1 55.79
 -13 -13 2 21.4 46.6
 -13 -13 2 -47.4 39.1
 -13 -13 2 -7.2 33.3
 12 13 -2 -25.7 43.4
 12 13 -2 61.19 37.9
 12 13 -2 52.89 54.99
 12 13 -2 -8 44.1
 -12 -13 2 -37.6 45.7
 -12 -13 2 -19.2 42.7
 -12 -13 2 38.7 31.4
 -12 -13 2 41.4 35.3
 -12 -13 2 32.5 36.6
 11 13 -2 29.6 51.69
 11 13 -2 -1.8 31.7
 11 13 -2 1.6 30.7
 11 13 -2 88.79 43.2
 -11 -13 2 -79.79 35.5
 -11 -13 2 29.8 40.6
 -11 -13 2 47.3 34.3
 -11 -13 2 1.1 27.7
 10 13 -2 10.3 27.4
 10 13 -2 120.39 31.9
 10 13 -2 -32.2 36.7
 10 13 -2 7.2 41
 -10 -13 2 43.7 24
 -10 -13 2 52.29 27
 -10 -13 2 32.4 34.3
 -10 -13 2 122.19 48.8
 -10 -13 2 2.8 29.6
 9 13 -2 -35.6 43.7
 9 13 -2 -30 24.3
 9 13 -2 -15.3 25.6
 9 13 -2 -26.6 31.7
 -9 -13 2 31.3 27.7
 -9 -13 2 64.09 36.8
 -9 -13 2 -24.7 19.8
 -9 -13 2 41.7 27.9
 8 13 -2 26 25.6
 8 13 -2 31.2 31.2
 8 13 -2 48.9 24.2
 8 13 -2 41 31.2
 8 13 -2 16.3 16.7
 -8 -13 2 8.3 23.5
 -8 -13 2 14.4 25.9
 -8 -13 2 8.1 37.5
 -8 -13 2 63.39 24.7
 -8 -13 2 0.8 21.2
 -8 -13 2 18.3 26.2
 7 13 -2 2.8 28.1
 7 13 -2 41.1 21.4
 7 13 -2 29.7 23.7
 7 13 -2 8.1 21.9
 -7 -13 2 -24.8 23.6
 -7 -13 2 -16.2 25.2
 -7 -13 2 35.9 31.6
 -7 -13 2 36.2 22.2
 -7 -13 2 -6.3 20.1
 -7 -13 2 -6.4 18
 6 13 -2 -3.9 19
 6 13 -2 -14.8 27.9
 6 13 -2 35 18.6
 6 13 -2 -24.5 21.2
 6 13 -2 8 23.8
 6 13 -2 -31.2 17.3
 -6 -13 2 2.9 24.9
 -6 -13 2 8.5 17.2
 -6 -13 2 -13.3 21.2
 -6 -13 2 5.1 17.9
 -6 -13 2 8.6 28.2
 -6 -13 2 31.2 22.9
 5 13 -2 -4 15.9
 5 13 -2 21.1 27.9
 5 13 -2 3.3 22.9
 5 13 -2 39.1 18.7
 5 13 -2 15 17
 5 13 -2 -7.5 17.1
 -5 -13 2 23.2 20.5
 -5 -13 2 20.6 17.5
 -5 -13 2 -5.4 19
 -5 -13 2 19 17.6
 -5 -13 2 26.6 26
 -5 -13 2 20.8 24.4
 4 13 -2 4.4 15.4
 4 13 -2 22.3 22.8
 4 13 -2 20.1 24.7
 4 13 -2 -3.7 17.2
 4 13 -2 41.4 29.3
 4 13 -2 -4.8 14.5
 -4 -13 2 7.5 16.1
 -4 -13 2 -2 23.3
 -4 -13 2 46.7 19.9
 -4 -13 2 4.7 24.7
 -4 -13 2 30.4 22.6
 3 13 -2 45.4 19.5
 3 13 -2 45.2 25.2
 3 13 -2 32.5 22.1
 3 13 -2 38.7 24.7
 -3 -13 2 -20.8 22.2
 -3 -13 2 13.2 18.2
 -3 -13 2 12.5 21.7
 -3 -13 2 3.5 21.1
 -3 -13 2 16.1 23
 -3 -13 2 23.6 15.7
 2 13 -2 -3.7 21.3
 2 13 -2 29.1 20.7
 2 13 -2 18.7 24.5
 2 13 -2 -34.6 21.7
 -2 -13 2 28.1 20.3
 -2 -13 2 -4 14.4
 -2 -13 2 -2.3 16.4
 -2 -13 2 -40.6 22
 -2 -13 2 -13.7 18.7
 -2 -13 2 8 20.7
 1 13 -2 18.6 22.3
 1 13 -2 -44.7 22.5
 1 13 -2 -8.4 20.3
 1 13 -2 14 23.5
 -1 -13 2 -9.2 16.4
 -1 -13 2 21.4 18.6
 -1 -13 2 6.6 18.3
 -1 -13 2 15.7 14.4
 -1 -13 2 1.2 24.1
 -1 -13 2 15.3 22
 0 13 -2 10.1 23.7
 0 13 -2 -9.3 22.5
 0 -13 2 26.4 27.1
 0 -13 2 9.3 17.7
 0 -13 2 19.5 14.7
 0 -13 2 -46.8 17.4
 -1 13 -2 5.4 24.2
 -1 13 -2 -4.2 25.4
 -1 13 -2 -18.1 22.8
 -1 13 -2 -47.3 26.1
 1 -13 2 -11.5 17.1
 1 -13 2 2 14.6
 1 -13 2 -30.9 27.5
 1 -13 2 25.2 23.8
 1 -13 2 12.7 18.2
 -2 13 -2 64.49 27
 -2 13 -2 70.39 29.7
 2 -13 2 3.1 28.3
 2 -13 2 12 19
 2 -13 2 -21.5 15
 2 -13 2 25 15.7
 2 -13 2 -37.2 24.5
 -3 13 -2 12.7 27.2
 3 -13 2 51.69 20.5
 3 -13 2 30.9 39.9
 3 -13 2 24.9 17.5
 3 -13 2 91.39 33.5
 3 -13 2 15.7 21.5
 -4 13 -2 -43.6 30.9
 4 -13 2 3.5 25.9
 4 -13 2 -40.8 23.5
 4 -13 2 64.19 44.4
 4 -13 2 -59.99 31.4
 -5 13 -2 51.79 55.19
 5 -13 2 19.6 28
 5 -13 2 13 37.2
 5 -13 2 -12.9 46.3
 -6 13 -2 10.4 59.09
 6 -13 2 -3.1 42.7
 6 -13 2 26.8 35.8
 6 -13 2 35.4 51.69
 -7 13 -2 -22.4 67.59
 7 -13 2 208.58 105.39
 7 -13 2 39.1 50.89
 8 -13 2 21.6 70.19
 15 12 -2 -59.89 77.39
 15 12 -2 58.69 53.89
 15 12 -2 -22.3 55.59
 15 12 -2 -69.39 58.59
 -15 -12 2 51.79 53.69
 -15 -12 2 55.09 52.79
 -15 -12 2 -82.49 39.3
 -15 -12 2 53.19 65.59
 -15 -12 2 -23.6 43.1
 14 12 -2 4.2 45.8
 14 12 -2 52.79 47.2
 14 12 -2 -26.9 61.19
 14 12 -2 27.9 54.09
 -14 -12 2 33.6 43
 -14 -12 2 7.7 41.4
 -14 -12 2 -1.7 36.4
 -14 -12 2 98.59 57.09
 -14 -12 2 52.09 37.8
 13 12 -2 -21.6 55.39
 13 12 -2 2.8 38.9
 13 12 -2 -48.2 37.5
 13 12 -2 -68.19 45.4
 -13 -12 2 -27.3 31.2
 -13 -12 2 1.7 42.8
 -13 -12 2 30.1 38.6
 -13 -12 2 -17.2 30.5
 -13 -12 2 -10.3 49.2
 12 12 -2 -10.4 42.2
 12 12 -2 -30.8 43.2
 12 12 -2 2.3 34.7
 12 12 -2 17.6 35.2
 -12 -12 2 10.4 28.7
 -12 -12 2 46.9 28.4
 -12 -12 2 -26.3 32.3
 -12 -12 2 2.1 32.5
 -12 -12 2 -10 60.59
 11 12 -2 21.4 29.1
 11 12 -2 18.1 42.7
 11 12 -2 30.3 38.3
 -11 -12 2 -4.4 36.5
 -11 -12 2 17.7 32.2
 -11 -12 2 33.4 30.7
 -11 -12 2 -25.2 25.8
 -11 -12 2 -7.7 23.4
 10 12 -2 34.1 30.2
 10 12 -2 49.99 23.1
 10 12 -2 14 34.5
 10 12 -2 57.59 39.7
 10 12 -2 -42.2 26
 -10 -12 2 68.49 31.7
 -10 -12 2 12.6 29.1
 -10 -12 2 15 22.7
 -10 -12 2 32.1 30.7
 9 12 -2 137.59 36.5
 9 12 -2 30.8 23.8
 9 12 -2 36 30
 9 12 -2 115.89 26.7
 9 12 -2 64.99 22.1
 -9 -12 2 27.3 26
 -9 -12 2 57.69 27.3
 -9 -12 2 129.39 28.8
 -9 -12 2 55.09 23.5
 -9 -12 2 85.09 23.6
 8 12 -2 -11 15.6
 8 12 -2 8 33.2
 8 12 -2 -36.5 20.4
 8 12 -2 33.4 22.4
 8 12 -2 -6.5 27.1
 8 12 -2 -0.4 23.7
 -8 -12 2 -33.2 18
 -8 -12 2 1.6 22.9
 -8 -12 2 7.8 21.3
 -8 -12 2 1.9 22.3
 -8 -12 2 -5.4 22.7
 -8 -12 2 60.19 33.4
 7 12 -2 299.67 33.6
 7 12 -2 287.77 36.7
 7 12 -2 226.48 35.2
 7 12 -2 171.98 27.9
 -7 -12 2 194.98 29.7
 -7 -12 2 253.27 37.5
 -7 -12 2 278.67 37.9
 -7 -12 2 258.27 37.1
 -7 -12 2 236.88 34.2
 -7 -12 2 281.17 32
 6 12 -2 34.8 17.8
 6 12 -2 42.6 19.1
 6 12 -2 12.3 17.3
 6 12 -2 -8 22.4
 6 12 -2 14.6 20.4
 6 12 -2 18.6 12.3
 -6 -12 2 9.9 17.4
 -6 -12 2 29.8 26.2
 -6 -12 2 10.6 16.3
 -6 -12 2 -17 20.1
 -6 -12 2 -2.9 19.9
 -6 -12 2 15.2 15.5
 5 12 -2 29.9 15.4
 5 12 -2 33.8 18.6
 5 12 -2 -0.8 23.1
 5 12 -2 11.5 17.4
 5 12 -2 40.7 23.9
 5 12 -2 37.7 15.7
 -5 -12 2 40.9 15.2
 -5 -12 2 70.79 24.5
 -5 -12 2 53.29 20.6
 -5 -12 2 31.9 18.7
 -5 -12 2 47.4 22.2
 -5 -12 2 21.9 15.1
 4 12 -2 44.3 38.5
 4 12 -2 44 14.3
 4 12 -2 56.69 21.1
 4 12 -2 25.3 14
 4 12 -2 22.3 20.9
 4 12 -2 50.39 16.5
 -4 -12 2 40.8 22.3
 -4 -12 2 49.1 20.7
 -4 -12 2 49.3 18.5
 -4 -12 2 23.8 20.2
 -4 -12 2 44 12.4
 -4 -12 2 9.3 16.7
 -4 -12 2 39.7 15
 3 12 -2 66.69 22.8
 3 12 -2 89.09 21.9
 3 12 -2 73.69 20.9
 3 12 -2 65.59 18.7
 -3 -12 2 77.39 20
 -3 -12 2 93.19 19.5
 -3 -12 2 104.29 16.7
 -3 -12 2 93.09 22.3
 -3 -12 2 72.19 22.6
 -3 -12 2 76.59 19.5
 2 12 -2 132.59 26.1
 2 12 -2 141.09 23.6
 2 12 -2 157.28 23.9
 2 12 -2 123.89 25.5
 -2 -12 2 123.19 21.8
 -2 -12 2 138.79 21
 -2 -12 2 184.88 26.9
 -2 -12 2 174.48 21.6
 -2 -12 2 191.68 26.2
 -2 -12 2 118.69 20.1
 1 12 -2 15.5 18.3
 1 12 -2 5.7 18.3
 1 12 -2 28.8 19.8
 1 12 -2 -19.9 18.8
 -1 -12 2 9.1 19.8
 -1 -12 2 -2.6 18.9
 -1 -12 2 -5.2 11.8
 -1 -12 2 20.5 15.4
 -1 -12 2 -10.2 15.1
 -1 -12 2 -15 15.3
 -1 -12 2 21.7 16.8
 0 12 -2 50.39 22
 0 12 -2 32.9 20.3
 0 12 -2 65.89 22.2
 0 -12 2 45.7 16.4
 0 -12 2 80.89 21.6
 0 -12 2 52.79 16.5
 0 -12 2 45.9 13.1
 0 -12 2 73.99 16.1
 0 -12 2 66.89 21
 -1 12 -2 -1.8 21.4
 -1 12 -2 -14.4 17.2
 -1 12 -2 -1.4 19.1
 -1 12 -2 -12.6 19.8
 1 -12 2 3.8 11
 1 -12 2 17.9 11.4
 1 -12 2 -13.6 22.2
 1 -12 2 4.6 10.9
 1 -12 2 -13.3 19.8
 1 -12 2 -7.2 16.4
 1 -12 2 -14.1 14.9
 -2 12 -2 238.68 34.2
 -2 12 -2 191.88 30.1
 2 -12 2 189.08 21.8
 2 -12 2 234.08 36.2
 2 -12 2 195.38 26.7
 2 -12 2 198.18 25.2
 2 -12 2 226.28 28.6
 2 -12 2 237.48 29.8
 2 -12 2 173.08 22.4
 -3 12 -2 85.89 29.5
 -3 12 -2 72.99 25.6
 3 -12 2 40.6 19.9
 3 -12 2 75.29 14.8
 3 -12 2 55.09 35.8
 3 -12 2 54.29 22.9
 3 -12 2 68.99 22.1
 3 -12 2 154.38 31.1
 3 -12 2 74.99 19.5
 3 -12 2 76.89 17.4
 4 -12 2 126.19 25.8
 4 -12 2 169.78 26.2
 4 -12 2 161.98 34.4
 4 -12 2 24.8 37.4
 4 -12 2 132.79 19.1
 -5 12 -2 3.1 44.6
 5 -12 2 15.7 39.9
 5 -12 2 12.1 26.5
 5 -12 2 -4.8 30.1
 5 -12 2 20.3 27.2
 -6 12 -2 163.28 56.09
 6 -12 2 106.09 47.1
 6 -12 2 54.79 38.3
 6 -12 2 76.79 31.5
 -7 12 -2 -38.5 55.79
 7 -12 2 32.4 42.1
 7 -12 2 93.89 53.59
 7 -12 2 2.2 35.8
 -8 12 -2 48 66.79
 8 -12 2 70.89 64.79
 8 -12 2 16.6 44.6
 -9 12 -2 96.99 78.09
 9 -12 2 56.89 70.49
 9 -12 2 74.59 55.99
 16 11 -2 -146.09 60.79
 16 11 -2 -118.79 56.09
 16 11 -2 -30 56.59
 16 11 -2 101.09 79.69
 -16 -11 2 99.39 80.59
 -16 -11 2 30.4 57.79
 -16 -11 2 -36.8 45.2
 15 11 -2 47.3 49.4
 15 11 -2 -30.4 51.69
 15 11 -2 33.5 64.39
 15 11 -2 -47.1 54.49
 -15 -11 2 139.39 65.79
 -15 -11 2 25.3 47.7
 -15 -11 2 -19.4 40.2
 -15 -11 2 -5.5 36.9
 -15 -11 2 6.5 44.2
 14 11 -2 46.6 44.6
 14 11 -2 45.1 62.29
 14 11 -2 -2.6 41.5
 14 11 -2 56.09 49.1
 -14 -11 2 27.7 33.4
 -14 -11 2 66.19 46.6
 -14 -11 2 88.39 54.29
 -14 -11 2 63.79 35
 -14 -11 2 -12.9 40.6
 13 11 -2 40.6 51.69
 13 11 -2 -33 34.6
 13 11 -2 -12.6 37.5
 13 11 -2 15.9 41.9
 -13 -11 2 44.9 36.1
 -13 -11 2 41 29.1
 -13 -11 2 72.69 45.6
 -13 -11 2 -4.1 28.7
 -13 -11 2 62.09 35.3
 12 11 -2 28.1 63.09
 12 11 -2 69.69 32.7
 12 11 -2 10.4 31.4
 12 11 -2 -10.1 40.6
 -12 -11 2 35 24.7
 -12 -11 2 -50.79 29.5
 -12 -11 2 45.2 31
 -12 -11 2 51.89 66.79
 -12 -11 2 43.2 26.2
 11 11 -2 41.9 29.8
 11 11 -2 -26.7 74.59
 11 11 -2 2 27.4
 11 11 -2 58.49 35.1
 -11 -11 2 -21.1 35.1
 -11 -11 2 34.7 23.1
 -11 -11 2 16.7 22.7
 -11 -11 2 -15.8 30.9
 10 11 -2 16.9 21.9
 10 11 -2 8.8 24.9
 10 11 -2 -4.2 30.9
 10 11 -2 20.6 25.2
 10 11 -2 12.7 35
 -10 -11 2 26.1 23.1
 -10 -11 2 28.3 22
 -10 -11 2 -3.6 24.1
 -10 -11 2 33.7 25.1
 -10 -11 2 49.9 28.5
 9 11 -2 17.3 18.5
 9 11 -2 3.6 31.1
 9 11 -2 29.2 22.6
 9 11 -2 18.9 22.1
 9 11 -2 25.7 27.8
 -9 -11 2 30.9 18.7
 -9 -11 2 20.6 23.6
 -9 -11 2 8.6 18.7
 -9 -11 2 11.5 21.7
 -9 -11 2 4 22.5
 8 11 -2 98.99 27.4
 8 11 -2 87.49 23.2
 8 11 -2 27 19.2
 8 11 -2 28.9 16.6
 8 11 -2 45.2 28.7
 8 11 -2 57.19 20.8
 -8 -11 2 98.59 31.4
 -8 -11 2 51.19 22.3
 -8 -11 2 46 19.8
 -8 -11 2 40.3 17.9
 -8 -11 2 39.4 21.5
 -8 -11 2 59.09 21
 7 11 -2 77.99 19.7
 7 11 -2 80.19 15.4
 7 11 -2 75.39 20
 7 11 -2 -3.4 39.2
 7 11 -2 54.79 28
 7 11 -2 60.59 25
 7 11 -2 75.49 19.4
 -7 -11 2 87.39 19.9
 -7 -11 2 55.19 19.9
 -7 -11 2 41 21.2
 -7 -11 2 76.79 27.4
 -7 -11 2 63.39 19
 6 11 -2 23.7 10.9
 6 11 -2 1.2 19.7
 6 11 -2 38.2 16.3
 6 11 -2 27.7 17.8
 6 11 -2 19.6 17.9
 6 11 -2 -6.2 15.7
 6 11 -2 43.7 10.4
 -6 -11 2 43.2 23.4
 -6 -11 2 26.9 17.8
 -6 -11 2 45.1 17.8
 -6 -11 2 34 15.4
 -6 -11 2 34.2 18
 5 11 -2 49.9 15.4
 5 11 -2 66.79 18
 5 11 -2 45.4 18.2
 5 11 -2 37.7 20.8
 5 11 -2 47.3 12.3
 5 11 -2 51.59 15.2
 5 11 -2 32 19.6
 -5 -11 2 55.79 13.5
 -5 -11 2 23.7 18.2
 -5 -11 2 44.9 18.2
 -5 -11 2 43.5 16
 -5 -11 2 38.1 20.3
 -5 -11 2 38.9 20
 4 11 -2 29.9 12.9
 4 11 -2 29.4 18.1
 4 11 -2 44.4 14.2
 4 11 -2 58.99 14.2
 4 11 -2 22 15.3
 4 11 -2 49.99 13.6
 -4 -11 2 43.7 24.7
 -4 -11 2 20 16.7
 -4 -11 2 28.7 11.2
 -4 -11 2 49.1 16.5
 -4 -11 2 57.59 20.4
 -4 -11 2 56.99 18.8
 -4 -11 2 65.19 18.4
 3 11 -2 16.1 14.2
 3 11 -2 7.4 15.8
 3 11 -2 -4.1 9.9
 3 11 -2 28 17.3
 3 11 -2 14.5 17.3
 -3 -11 2 9.2 16.4
 -3 -11 2 25.5 22.6
 -3 -11 2 26.7 17.6
 -3 -11 2 25.2 16
 -3 -11 2 -12.8 17.2
 -3 -11 2 7.2 13.6
 -3 -11 2 -3.8 14.1
 2 11 -2 10.8 16.2
 2 11 -2 28.7 17.2
 2 11 -2 23.7 16.8
 2 11 -2 8.3 19.6
 2 11 -2 39 15.6
 -2 -11 2 41.1 16.9
 -2 -11 2 41.5 17
 -2 -11 2 30.5 15.6
 -2 -11 2 52.19 17.1
 -2 -11 2 22.7 14.2
 -2 -11 2 31.2 13.8
 -2 -11 2 27.1 21.1
 1 11 -2 100.19 19.8
 1 11 -2 84.19 18.5
 1 11 -2 71.39 19
 1 11 -2 70.89 19.2
 1 11 -2 93.99 19.5
 -1 -11 2 94.09 17
 -1 -11 2 59.19 18.4
 -1 -11 2 88.89 21.8
 -1 -11 2 88.29 16.3
 -1 -11 2 49.2 14.8
 -1 -11 2 70.89 24.7
 -1 -11 2 82.89 19.2
 0 11 -2 -4.9 16.6
 0 11 -2 23.7 17.6
 0 11 -2 -8.2 15.6
 0 -11 2 1.2 14.4
 0 -11 2 -8.2 12.1
 0 -11 2 1.8 15.4
 0 -11 2 31 17.7
 0 -11 2 5.4 8.7
 0 -11 2 1.8 12.9
 0 -11 2 5.9 16.1
 -1 11 -2 189.58 26.5
 -1 11 -2 233.78 30
 -1 11 -2 220.38 30.5
 -1 11 -2 176.88 23.6
 1 -11 2 216.88 28.8
 1 -11 2 216.88 23.4
 1 -11 2 219.98 23.9
 1 -11 2 215.18 28.4
 1 -11 2 173.38 21.5
 1 -11 2 245.98 31.2
 -2 11 -2 38.9 18.8
 -2 11 -2 19.1 21
 2 -11 2 -15.4 16.4
 2 -11 2 -3 17.5
 2 -11 2 14.3 9.2
 2 -11 2 -34.6 15.7
 2 -11 2 -19.6 12.7
 -3 11 -2 46.1 22
 -3 11 -2 67.19 24.6
 3 -11 2 65.79 17.7
 3 -11 2 72.09 15.2
 3 -11 2 37.3 19.9
 3 -11 2 41.9 24.5
 3 -11 2 -10.5 30.9
 3 -11 2 42 18.9
 3 -11 2 49.1 11.5
 -4 11 -2 31 25.7
 4 -11 2 66.99 19.7
 4 -11 2 46 25.3
 4 -11 2 74.39 23.2
 4 -11 2 40.6 32
 4 -11 2 66.89 19.9
 -5 11 -2 -36.4 36.7
 5 -11 2 -12.5 33.6
 5 -11 2 35.7 22.3
 5 -11 2 -4.2 15.3
 5 -11 2 21.3 25.4
 5 -11 2 -35.3 25.2
 -6 11 -2 -22 42.7
 6 -11 2 7.8 26.3
 6 -11 2 -7.7 37.2
 6 -11 2 41.7 29.8
 6 -11 2 -2.4 28.3
 -7 11 -2 13.4 50.29
 7 -11 2 59.29 33
 7 -11 2 35.1 52.19
 7 -11 2 83.49 37.2
 7 -11 2 67.69 33.8
 -8 11 -2 -31.1 59.59
 8 -11 2 57.19 39
 8 -11 2 25.8 53.29
 8 -11 2 11.1 40.2
 -9 11 -2 -64.89 68.09
 9 -11 2 -23.5 59.59
 9 -11 2 -16.9 45.3
 10 -11 2 67.89 72.59
 16 10 -2 -33.7 57.59
 16 10 -2 60.69 58.29
 16 10 -2 87.69 67.19
 16 10 -2 40 63.79
 -16 -10 2 110.49 47
 -16 -10 2 -9.1 52.59
 -16 -10 2 187.28 73.29
 15 10 -2 -7 52.29
 15 10 -2 18.1 46.6
 15 10 -2 -17.4 54.29
 15 10 -2 19.9 45.2
 -15 -10 2 -60.99 36.4
 -15 -10 2 3.2 52.69
 -15 -10 2 77.79 61.39
 -15 -10 2 -16.7 48.1
 14 10 -2 21 50.79
 14 10 -2 8.1 45.6
 14 10 -2 -38 40.1
 14 10 -2 39.6 41
 -14 -10 2 -19.5 31
 -14 -10 2 -16.2 36.1
 -14 -10 2 -7 31.3
 -14 -10 2 60.39 41.5
 -14 -10 2 53.89 52.89
 13 10 -2 55.89 35.6
 13 10 -2 4.4 47.4
 13 10 -2 14 35
 13 10 -2 -37.8 39.2
 -13 -10 2 -43.6 31.1
 -13 -10 2 0.8 41
 -13 -10 2 -8.6 27.6
 -13 -10 2 15.1 26.6
 -13 -10 2 -10.4 32.5
 12 10 -2 8.9 38.2
 12 10 -2 36.4 31.5
 12 10 -2 18.8 36.2
 12 10 -2 41.7 52.09
 -12 -10 2 32.1 33.6
 -12 -10 2 3 25.5
 -12 -10 2 37.3 22.7
 -12 -10 2 -90.89 38.1
 -12 -10 2 -2 36.8
 11 10 -2 41.3 38.6
 11 10 -2 3.4 30.2
 11 10 -2 -53.39 25
 11 10 -2 -13.7 25.7
 -11 -10 2 -52.99 26.4
 -11 -10 2 2.4 27.4
 -11 -10 2 22 22.2
 -11 -10 2 3.7 22.1
 -11 -10 2 32.7 25.5
 10 10 -2 74.59 28.3
 10 10 -2 -15.3 20.2
 10 10 -2 20.2 24.1
 10 10 -2 27.2 32.8
 10 10 -2 3.5 23
 -10 -10 2 50.09 21.2
 -10 -10 2 41.4 19.8
 -10 -10 2 51.79 26.9
 -10 -10 2 83.79 26.6
 -10 -10 2 17.8 23
 9 10 -2 143.49 34.3
 9 10 -2 150.18 27.4
 9 10 -2 131.99 25.1
 9 10 -2 188.58 31.9
 9 10 -2 104.59 22.5
 -9 -10 2 120.19 22.8
 -9 -10 2 123.29 25.8
 -9 -10 2 163.58 23.9
 -9 -10 2 148.09 27.4
 -9 -10 2 143.19 27.6
 8 10 -2 5.9 19.7
 8 10 -2 37.1 22.5
 8 10 -2 26.6 15.5
 8 10 -2 -3.3 24.3
 8 10 -2 11.5 19.2
 8 10 -2 43.6 19.3
 -8 -10 2 3.2 25.2
 -8 -10 2 38.6 23.1
 -8 -10 2 40.2 19.1
 -8 -10 2 42.9 16.6
 -8 -10 2 20.1 18.6
 7 10 -2 17.6 19
 7 10 -2 27.4 22.7
 7 10 -2 7.8 15.6
 7 10 -2 10 19.9
 7 10 -2 20.6 16.3
 7 10 -2 10.8 16.2
 7 10 -2 17.1 12.4
 -7 -10 2 13.9 14.9
 -7 -10 2 29.3 23
 -7 -10 2 35.3 17.9
 -7 -10 2 19.2 15.8
 -7 -10 2 33.4 18.3
 6 10 -2 67.79 23.7
 6 10 -2 35.2 12.4
 6 10 -2 36.9 16.6
 6 10 -2 7.6 19.3
 6 10 -2 64.59 15.6
 6 10 -2 70.69 16.4
 6 10 -2 40.2 17.2
 6 10 -2 28.1 18.8
 -6 -10 2 60.99 26.9
 -6 -10 2 47.4 16.1
 -6 -10 2 40.5 15.3
 -6 -10 2 38.8 14
 -6 -10 2 45.3 21.2
 -6 -10 2 42 17.5
 5 10 -2 68.59 14.9
 5 10 -2 76.19 11.6
 5 10 -2 68.29 15.5
 5 10 -2 61.19 18.9
 5 10 -2 79.99 20.2
 5 10 -2 88.29 18.5
 5 10 -2 51.29 16
 -5 -10 2 55.99 16.8
 -5 -10 2 59.29 13.5
 -5 -10 2 110.69 17.6
 -5 -10 2 74.89 17.7
 -5 -10 2 68.19 16.5
 -5 -10 2 74.59 20.9
 -5 -10 2 48.6 18.4
 4 10 -2 33.5 14.3
 4 10 -2 64.09 12.9
 4 10 -2 78.79 14
 4 10 -2 88.99 13
 4 10 -2 61.89 14.2
 4 10 -2 73.49 17.6
 4 10 -2 76.69 17.6
 4 10 -2 109.19 23.8
 -4 -10 2 82.29 16.2
 -4 -10 2 70.69 16.4
 -4 -10 2 65.89 16.3
 -4 -10 2 38.4 19
 -4 -10 2 47.7 18.9
 -4 -10 2 67.19 14
 -4 -10 2 66.39 15.8
 -4 -10 2 69.49 17.9
 -4 -10 2 60.09 11.4
 3 10 -2 52.29 11
 3 10 -2 30.9 19.1
 3 10 -2 33.3 15.5
 3 10 -2 48.6 11.3
 3 10 -2 70.59 16.6
 3 10 -2 59.99 12.2
 3 10 -2 42.6 16.1
 3 10 -2 81.29 14.1
 -3 -10 2 59.99 16.8
 -3 -10 2 49.2 17
 -3 -10 2 30.9 9.3
 -3 -10 2 28.8 15.5
 -3 -10 2 59.49 21.3
 -3 -10 2 46 15.2
 -3 -10 2 67.49 12.9
 -3 -10 2 38.7 13.6
 -3 -10 2 -0.5 15.5
 2 10 -2 162.98 23
 2 10 -2 149.79 20.7
 2 10 -2 153.58 21.8
 2 10 -2 174.98 23.2
 2 10 -2 173.18 20.6
 -2 -10 2 143.39 23.8
 -2 -10 2 165.48 20.9
 -2 -10 2 192.98 23.8
 -2 -10 2 140.69 18.8
 -2 -10 2 121.79 17.7
 -2 -10 2 170.78 21
 -2 -10 2 155.88 22.3
 1 10 -2 -4.2 13.2
 1 10 -2 -17.2 12.9
 1 10 -2 -0.5 13.5
 1 10 -2 -1.3 15.2
 1 10 -2 5.6 13.8
 -1 -10 2 10.6 11.7
 -1 -10 2 -11 17.7
 -1 -10 2 -9.7 13.1
 -1 -10 2 7.9 12.1
 -1 -10 2 3.3 11
 -1 -10 2 -12.9 12.3
 -1 -10 2 -1.2 12.9
 0 10 -2 0.9 14.4
 0 10 -2 8.2 13.6
 0 10 -2 18.2 14.9
 0 10 -2 -2.2 13.7
 0 -10 2 -7.8 13.4
 0 -10 2 -6.9 10.4
 0 -10 2 -9 11.4
 0 -10 2 -12.9 12.9
 0 -10 2 5.8 7.4
 0 -10 2 -3.9 14.2
 0 -10 2 -10 9.5
 -1 10 -2 157.38 23.5
 -1 10 -2 247.78 29.2
 -1 10 -2 208.58 24.3
 -1 10 -2 197.78 22.6
 1 -10 2 165.38 20.2
 1 -10 2 191.88 22.3
 1 -10 2 196.28 19.7
 1 -10 2 195.98 24.7
 1 -10 2 223.28 27.1
 -2 10 -2 207.98 27.9
 -2 10 -2 163.88 23
 2 -10 2 162.48 22.8
 2 -10 2 216.48 25.8
 2 -10 2 174.28 22.3
 2 -10 2 151.68 15.2
 2 -10 2 165.78 21
 -3 10 -2 79.89 19.8
 -3 10 -2 110.19 23.7
 3 -10 2 93.89 30
 3 -10 2 56.19 9.4
 3 -10 2 62.29 16.1
 3 -10 2 71.29 20.1
 3 -10 2 56.39 15.5
 3 -10 2 68.29 20.3
 3 -10 2 59.89 13.2
 -4 10 -2 153.58 30.8
 4 -10 2 177.78 34.2
 4 -10 2 188.48 22.3
 4 -10 2 171.98 23
 4 -10 2 292.87 32
 4 -10 2 195.08 27.8
 4 -10 2 213.38 25.8
 -5 10 -2 96.79 29.5
 5 -10 2 63.89 30.6
 5 -10 2 63.39 17
 5 -10 2 57.89 24
 5 -10 2 97.39 16.7
 5 -10 2 83.19 21.8
 5 -10 2 79.49 24.3
 -6 10 -2 70.99 41.4
 6 -10 2 30.2 26.1
 6 -10 2 48.2 34.2
 6 -10 2 32.5 17.5
 6 -10 2 79.09 25.9
 6 -10 2 68.89 24.1
 -7 10 -2 137.09 45.8
 7 -10 2 25 29.7
 7 -10 2 68.09 21.6
 7 -10 2 75.09 29.6
 7 -10 2 125.19 33.4
 7 -10 2 93.29 41.1
 -8 10 -2 142.49 51.79
 8 -10 2 33.8 34.3
 8 -10 2 84.29 49.2
 8 -10 2 60.29 35.4
 8 -10 2 3.9 33.8
 -9 10 -2 37 55.69
 9 -10 2 29 55.19
 9 -10 2 73.29 55.19
 9 -10 2 84.89 41.7
 -10 10 -2 -41.8 64.89
 10 -10 2 -15.1 62.19
 10 -10 2 16.6 48.4
 16 9 -2 47.6 59.59
 16 9 -2 17.5 54.59
 16 9 -2 33.7 67.39
 16 9 -2 106.09 54.29
 -16 -9 2 -7.1 42.1
 -16 -9 2 -31.6 50.09
 -16 -9 2 33.4 63.49
 15 9 -2 -35.3 44.7
 15 9 -2 42.8 54.39
 15 9 -2 29.8 45.1
 15 9 -2 40.4 50.09
 -15 -9 2 -40.5 54.59
 -15 -9 2 -4.7 33.9
 -15 -9 2 -58.49 41.4
 14 9 -2 33 38.7
 14 9 -2 73.69 43.4
 14 9 -2 52.69 42.3
 14 9 -2 15.9 39
 -14 -9 2 -0.6 37.6
 -14 -9 2 92.29 31.7
 -14 -9 2 -54.99 43.1
 -14 -9 2 -16.8 36.4
 -14 -9 2 -27.8 26.5
 13 9 -2 34.1 36.5
 13 9 -2 59.79 34.3
 13 9 -2 89.49 40.3
 13 9 -2 60.79 42.3
 -13 -9 2 71.69 39.2
 -13 -9 2 18.6 29.5
 -13 -9 2 61.29 27.7
 -13 -9 2 79.29 25.1
 -13 -9 2 -44.7 37.5
 12 9 -2 9.4 36.1
 12 9 -2 27.5 58.69
 12 9 -2 64.19 33.9
 12 9 -2 -3.5 39.6
 -12 -9 2 56.39 48.1
 -12 -9 2 22.2 30.2
 -12 -9 2 43.6 34.4
 -12 -9 2 32.8 22.4
 -12 -9 2 29 34.4
 11 9 -2 -9.3 24.7
 11 9 -2 -16 25.2
 11 9 -2 13.2 28.2
 11 9 -2 39.1 24.5
 -11 -9 2 -7.2 25.7
 -11 -9 2 -4.3 19.5
 -11 -9 2 4.6 26.7
 -11 -9 2 -8.9 23.5
 -11 -9 2 -11.7 17.9
 10 9 -2 2.2 21.1
 10 9 -2 15 25
 10 9 -2 8.2 20.5
 10 9 -2 -24.3 20.6
 10 9 -2 -20.1 24.9
 -10 -9 2 34.8 18.3
 -10 -9 2 -7.8 17
 -10 -9 2 32.7 23.7
 -10 -9 2 -5.2 20.2
 -10 -9 2 -5.3 22.1
 9 9 -2 13 21.2
 9 9 -2 24.4 18.7
 9 9 -2 12.7 18.6
 9 9 -2 32 24.9
 9 9 -2 19.2 17.3
 -9 -9 2 -15.8 14.3
 -9 -9 2 34.1 20.7
 -9 -9 2 2.4 19.4
 -9 -9 2 6.2 19.4
 8 9 -2 67.69 18.3
 8 9 -2 37 19.4
 8 9 -2 62.39 18.9
 8 9 -2 24.1 24.6
 8 9 -2 4.9 14.7
 8 9 -2 86.69 23.5
 -8 -9 2 40.7 17.5
 -8 -9 2 62.59 17
 -8 -9 2 76.19 20.9
 -8 -9 2 58.59 18.1
 -8 -9 2 65.09 25.3
 7 9 -2 86.79 22.1
 7 9 -2 91.19 19.9
 7 9 -2 67.29 17.3
 7 9 -2 101.09 15
 7 9 -2 90.79 19.9
 7 9 -2 94.99 25.8
 7 9 -2 114.49 22.8
 7 9 -2 128.29 18.9
 -7 -9 2 54.69 23.1
 -7 -9 2 85.99 18
 -7 -9 2 85.99 16.8
 -7 -9 2 63.09 17.6
 -7 -9 2 21.2 24.2
 -7 -9 2 84.39 19.3
 6 9 -2 86.19 19.8
 6 9 -2 53.29 18
 6 9 -2 128.79 25.5
 6 9 -2 102.79 18.9
 6 9 -2 96.49 17.2
 6 9 -2 108.49 17.5
 6 9 -2 66.19 15.9
 6 9 -2 62.49 13
 -6 -9 2 51.79 19.8
 -6 -9 2 93.69 17.9
 -6 -9 2 77.79 15.2
 -6 -9 2 73.89 16.5
 -6 -9 2 42.1 20.2
 -6 -9 2 83.39 17.6
 -6 -9 2 89.69 15.9
 -6 -9 2 80.99 20.9
 -6 -9 2 51.29 18
 -6 -9 2 95.29 18.1
 5 9 -2 3.4 11.2
 5 9 -2 3.9 6.8
 5 9 -2 -5.7 8.7
 5 9 -2 -11 18.4
 5 9 -2 -4.7 12.3
 5 9 -2 9.6 14.8
 5 9 -2 -13.8 17.3
 5 9 -2 10.7 10.5
 5 9 -2 -5.7 13.4
 5 9 -2 -2.8 10.9
 -5 -9 2 -14.5 12.1
 -5 -9 2 5.6 10.5
 -5 -9 2 -8.3 16.3
 -5 -9 2 16.8 10.2
 -5 -9 2 -31.5 14.5
 -5 -9 2 6.2 11.9
 -5 -9 2 2.8 13.4
 -5 -9 2 -5.4 16.9
 -5 -9 2 0.2 12.3
 -5 -9 2 -0.1 12.6
 4 9 -2 24.8 12.9
 4 9 -2 54.69 18
 4 9 -2 14 10.5
 4 9 -2 16.6 14.1
 4 9 -2 22.9 6.5
 4 9 -2 28.8 8.9
 4 9 -2 21.5 13.1
 4 9 -2 18.6 11
 4 9 -2 3.5 9.8
 -4 -9 2 14.4 15.2
 -4 -9 2 19.5 11.7
 -4 -9 2 25.8 8.4
 -4 -9 2 11.7 15.6
 -4 -9 2 13.2 9.8
 -4 -9 2 19.9 14.1
 -4 -9 2 21.8 11.9
 -4 -9 2 30.6 14.6
 -4 -9 2 15.2 11.3
 -4 -9 2 4.3 11.1
 3 9 -2 19.1 11.8
 3 9 -2 30.7 10.5
 3 9 -2 42.2 13.6
 3 9 -2 12.5 13.2
 3 9 -2 44 10
 3 9 -2 55.09 16.4
 3 9 -2 35.1 10.1
 3 9 -2 56.49 10.2
 -3 -9 2 25.4 12
 -3 -9 2 32.8 10.2
 -3 -9 2 4 15.3
 -3 -9 2 36.1 14.5
 -3 -9 2 30.5 11.1
 -3 -9 2 32.1 12.5
 -3 -9 2 23.4 10.8
 -3 -9 2 19.9 15.8
 -3 -9 2 31.4 7.7
 -3 -9 2 37.4 13.3
 2 9 -2 81.79 11.6
 2 9 -2 89.39 15.2
 2 9 -2 106.09 17.6
 2 9 -2 84.89 15.6
 2 9 -2 92.99 15.6
 2 9 -2 109.99 15.3
 -2 -9 2 119.09 16.7
 -2 -9 2 64.59 17.6
 -2 -9 2 91.89 13.4
 -2 -9 2 113.59 16.4
 -2 -9 2 79.79 15.2
 -2 -9 2 89.19 15.4
 -2 -9 2 100.29 15
 -2 -9 2 109.89 18.6
 -2 -9 2 78.89 12.6
 1 9 -2 43.9 12.9
 1 9 -2 36.3 13.9
 1 9 -2 36.5 13
 1 9 -2 12.1 11.6
 1 9 -2 55.59 13.8
 -1 -9 2 25.5 16.3
 -1 -9 2 62.89 15.5
 -1 -9 2 63.39 12.4
 -1 -9 2 42.1 13.1
 -1 -9 2 50.39 10.1
 -1 -9 2 26.5 11.8
 -1 -9 2 40.9 12.4
 -1 -9 2 34.2 16.9
 -1 -9 2 38.4 13.2
 0 9 -2 61.19 14.4
 0 9 -2 67.69 13.8
 0 9 -2 49.7 14.8
 0 9 -2 50.79 12.8
 0 -9 2 49.3 8.8
 0 -9 2 51.99 12.9
 0 -9 2 35.4 8.1
 0 -9 2 60.39 14.1
 0 -9 2 46.8 10.2
 0 -9 2 -14.6 16
 0 -9 2 67.99 11
 0 -9 2 50.29 12.8
 0 -9 2 23.4 11.3
 -1 9 -2 47.5 14.5
 -1 9 -2 41.2 15.3
 -1 9 -2 29.6 11.5
 -1 9 -2 29.3 10.9
 1 -9 2 37.4 9.3
 1 -9 2 53.39 10
 1 -9 2 28.6 13.1
 1 -9 2 12.7 17.1
 1 -9 2 51.39 13
 1 -9 2 32.4 12.5
 -2 9 -2 192.88 22.5
 -2 9 -2 230.08 27.3
 2 -9 2 188.38 25
 2 -9 2 159.28 16.9
 2 -9 2 165.08 24.6
 2 -9 2 185.58 24.1
 2 -9 2 165.38 21
 2 -9 2 172.78 19.9
 -3 9 -2 151.88 20.8
 -3 9 -2 171.78 26.1
 3 -9 2 160.58 19.9
 3 -9 2 136.39 25.9
 3 -9 2 162.88 29.5
 3 -9 2 176.68 22.7
 3 -9 2 151.58 25.2
 3 -9 2 147.59 20.2
 -4 9 -2 26.3 19.9
 4 -9 2 31.8 17.7
 4 -9 2 15 33.5
 4 -9 2 24.1 18.2
 4 -9 2 -9.1 20.2
 4 -9 2 0.7 12.5
 4 -9 2 24.4 15.1
 -5 9 -2 35.3 22.1
 5 -9 2 10.5 23.7
 5 -9 2 11.8 27
 5 -9 2 34.4 13.5
 5 -9 2 37.2 20.3
 5 -9 2 27.3 17.7
 5 -9 2 15.6 20.5
 -6 9 -2 -3.3 13.6
 -6 9 -2 80.99 30.7
 6 -9 2 2 27.8
 6 -9 2 0.7 15.5
 6 -9 2 -10.2 20.8
 6 -9 2 -1.1 31
 6 -9 2 -0.4 18.5
 6 -9 2 -16.2 19
 6 -9 2 1.4 14.1
 6 -9 2 4.7 22.8
 -7 9 -2 28 18.8
 -7 9 -2 28.3 35.2
 7 -9 2 -51.99 20.5
 7 -9 2 59.69 26.1
 7 -9 2 -4.9 25.8
 7 -9 2 91.89 34.4
 7 -9 2 17.8 17.1
 7 -9 2 13.9 34.6
 7 -9 2 53.29 24.8
 -8 9 -2 13.1 22.8
 -8 9 -2 82.39 41.9
 8 -9 2 45.6 20.3
 8 -9 2 58.69 29.3
 8 -9 2 31.7 33.5
 8 -9 2 58.49 41
 8 -9 2 8.6 28.5
 -9 9 -2 58.79 48.1
 9 -9 2 3.3 38.3
 9 -9 2 37.1 37.3
 9 -9 2 125.39 51.39
 -10 9 -2 -40.7 55.49
 10 -9 2 -105.09 39.4
 10 -9 2 79.79 57.59
 10 -9 2 5.6 43.5
 -11 9 -2 56.09 67.69
 11 -9 2 32.6 62.69
 11 -9 2 -30.5 50.59
 16 8 -2 108.49 60.19
 16 8 -2 8.3 63.29
 16 8 -2 82.29 52.99
 16 8 -2 -15.2 51.89
 -16 -8 2 105.59 62.29
 -16 -8 2 88.19 41.9
 -16 -8 2 123.19 56.89
 15 8 -2 -31.3 48
 15 8 -2 -107.49 42.4
 15 8 -2 -3.1 45.6
 15 8 -2 -36.7 45.1
 -15 -8 2 -8.5 33.8
 -15 -8 2 16.5 51.49
 -15 -8 2 127.09 44.7
 14 8 -2 -25 39.4
 14 8 -2 -91.49 37.6
 14 8 -2 -54.39 35.5
 14 8 -2 -38.2 37.4
 -14 -8 2 -43.6 24.7
 -14 -8 2 4.9 27.9
 -14 -8 2 17.6 37.7
 -14 -8 2 -29.5 34.2
 13 8 -2 4.6 34.5
 13 8 -2 1.2 33.9
 13 8 -2 -22 31.2
 13 8 -2 -67.49 36.5
 -13 -8 2 41 25.4
 -13 -8 2 25.6 22.8
 -13 -8 2 12.4 33.4
 -13 -8 2 -46.1 34.5
 -13 -8 2 25.1 29.4
 12 8 -2 14.9 30.8
 12 8 -2 -7.2 27.5
 12 8 -2 -43.6 27.2
 12 8 -2 11.2 37
 -12 -8 2 -5 31.2
 -12 -8 2 14.8 26.9
 -12 -8 2 -12.1 26
 -12 -8 2 -37.7 20.6
 -12 -8 2 -11.8 19
 11 8 -2 38.9 27.4
 11 8 -2 26.9 23.8
 11 8 -2 -0.3 22.5
 11 8 -2 12.2 25.2
 -11 -8 2 25.9 24.5
 -11 -8 2 -3.2 16.1
 -11 -8 2 -1.1 18
 -11 -8 2 39.3 22.8
 -11 -8 2 38.8 26.8
 10 8 -2 21.3 21
 10 8 -2 18.6 23.4
 10 8 -2 42.5 24
 10 8 -2 41.7 21.5
 10 8 -2 39.5 22.9
 -10 -8 2 47.8 21.5
 -10 -8 2 39.5 22.1
 -10 -8 2 35.3 22.4
 -10 -8 2 49.5 16.6
 -10 -8 2 15.8 15.7
 9 8 -2 120.09 26.4
 9 8 -2 91.29 23.9
 9 8 -2 141.39 27.8
 9 8 -2 125.89 24.1
 9 8 -2 99.49 19.8
 -9 -8 2 110.99 22
 -9 -8 2 145.59 24.3
 -9 -8 2 105.09 23
 -9 -8 2 104.59 18.9
 8 8 -2 188.18 25.8
 8 8 -2 194.48 27.8
 8 8 -2 271.57 29.2
 8 8 -2 203.08 28.7
 8 8 -2 190.08 28.3
 8 8 -2 211.48 28.6
 -8 -8 2 229.68 25.9
 -8 -8 2 233.18 27.9
 -8 -8 2 241.48 33.2
 -8 -8 2 227.18 29.9
 -8 -8 2 231.48 28
 7 8 -2 261.97 29.4
 7 8 -2 303.87 32.4
 7 8 -2 315.37 31.8
 7 8 -2 288.97 36.8
 7 8 -2 288.47 31.3
 7 8 -2 295.57 33.6
 7 8 -2 326.77 29.8
 7 8 -2 302.67 28
 7 8 -2 306.17 38.9
 -7 -8 2 283.97 36
 -7 -8 2 319.77 33.7
 -7 -8 2 358.76 30.6
 -7 -8 2 289.47 37.4
 -7 -8 2 319.07 31.4
 -7 -8 2 319.17 29.6
 -7 -8 2 319.67 28.1
 -7 -8 2 311.37 32.6
 -7 -8 2 299.97 35.5
 6 8 -2 6 12.4
 6 8 -2 -12.6 15.9
 6 8 -2 12.3 9.3
 6 8 -2 -13.2 13.1
 6 8 -2 9 12
 6 8 -2 4.6 11
 6 8 -2 1.6 16.3
 6 8 -2 -5.5 13.7
 6 8 -2 -5.4 11.1
 -6 -8 2 1.9 10.1
 -6 -8 2 -8.1 12.9
 -6 -8 2 21.3 16.1
 -6 -8 2 -1.7 9.5
 -6 -8 2 -1.1 11.9
 -6 -8 2 -5.7 11.8
 -6 -8 2 -6.6 11.5
 -6 -8 2 -20.2 15.7
 -6 -8 2 -7.3 13.5
 5 8 -2 154.58 19.7
 5 8 -2 116.69 16.3
 5 8 -2 134.89 22.9
 5 8 -2 110.69 18.8
 5 8 -2 133.59 17
 5 8 -2 124.09 16.7
 5 8 -2 97.99 21.1
 5 8 -2 109.29 18.6
 -5 -8 2 127.39 18.6
 -5 -8 2 121.19 18.2
 -5 -8 2 100.39 18.7
 -5 -8 2 105.29 18.7
 -5 -8 2 131.49 17.8
 -5 -8 2 122.19 16.9
 -5 -8 2 132.79 18.3
 -5 -8 2 130.39 17.8
 -5 -8 2 145.79 21.3
 -5 -8 2 127.09 16
 4 8 -2 26.3 12.4
 4 8 -2 30.6 9.8
 4 8 -2 24.8 9.3
 4 8 -2 21.9 14.7
 4 8 -2 39.2 10.9
 4 8 -2 31.8 12.1
 4 8 -2 48.1 7.7
 4 8 -2 6.3 10.2
 4 8 -2 21.7 7.2
 4 8 -2 17.8 15
 -4 -8 2 36.8 9.7
 -4 -8 2 27.3 11.4
 -4 -8 2 40.2 8.2
 -4 -8 2 17.9 11.6
 -4 -8 2 8.6 10.8
 -4 -8 2 22.8 12.4
 -4 -8 2 39.2 11.3
 -4 -8 2 23.2 10.6
 -4 -8 2 24.4 13.9
 -4 -8 2 31.9 13.3
 3 8 -2 457.65 34.9
 3 8 -2 439.16 30.2
 3 8 -2 466.65 32.5
 3 8 -2 437.76 35
 3 8 -2 497.95 36.2
 3 8 -2 404.16 36
 3 8 -2 438.16 32.6
 3 8 -2 444.76 33.1
 -3 -8 2 446.06 34.7
 -3 -8 2 470.55 37.5
 -3 -8 2 444.76 33.6
 -3 -8 2 460.85 35.3
 -3 -8 2 454.25 31.8
 -3 -8 2 474.25 35
 -3 -8 2 464.35 33.2
 -3 -8 2 438.26 36
 -3 -8 2 447.06 38
 -3 -8 2 449.95 35.3
 2 8 -2 165.88 18.9
 2 8 -2 167.98 20.6
 2 8 -2 138.69 14.8
 2 8 -2 159.88 19.2
 2 8 -2 150.98 15
 2 8 -2 166.88 17.3
 2 8 -2 175.58 20
 -2 -8 2 152.58 18.4
 -2 -8 2 170.48 22
 -2 -8 2 159.88 17.8
 -2 -8 2 181.68 21.1
 -2 -8 2 167.88 19.2
 -2 -8 2 164.48 16.9
 -2 -8 2 170.18 19.8
 -2 -8 2 167.88 13.4
 -2 -8 2 170.48 18.6
 -2 -8 2 151.38 20.4
 1 8 -2 4.3 10.4
 1 8 -2 6.4 9.6
 1 8 -2 -1.3 8.6
 1 8 -2 -4.2 8.8
 1 8 -2 8.2 9.9
 -1 -8 2 -30.1 12
 -1 -8 2 0.5 7.3
 -1 -8 2 6.1 8.8
 -1 -8 2 6.5 10.2
 -1 -8 2 -14.2 9.5
 -1 -8 2 14.3 12.8
 -1 -8 2 -6.3 5.3
 -1 -8 2 5 8.9
 -1 -8 2 6.4 6.5
 -1 -8 2 -3.4 8.6
 0 8 -2 292.87 25.5
 0 8 -2 308.27 27.2
 0 8 -2 286.17 26.1
 0 8 -2 300.57 24.6
 0 -8 2 286.57 23.1
 0 -8 2 259.17 29.4
 0 -8 2 275.67 26.1
 0 -8 2 277.57 22.1
 0 -8 2 307.27 21.7
 0 -8 2 310.57 24.6
 0 -8 2 287.97 24.9
 0 -8 2 286.77 23.1
 0 -8 2 342.47 36.5
 -1 8 -2 158.78 19.3
 -1 8 -2 116.29 15.3
 -1 8 -2 150.78 20.6
 -1 8 -2 100.39 14.6
 1 -8 2 144.49 18.6
 1 -8 2 118.99 12.9
 1 -8 2 137.99 17
 1 -8 2 132.59 15.3
 1 -8 2 115.29 18.7
 1 -8 2 111.89 11.6
 1 -8 2 116.59 14.4
 -2 8 -2 8.7 10.4
 -2 8 -2 -1 12.9
 2 -8 2 -3.6 9
 2 -8 2 -12.2 11.8
 2 -8 2 3.1 7.8
 2 -8 2 23.1 14
 2 -8 2 7.6 14.8
 2 -8 2 -12.7 13
 -3 8 -2 17.2 16
 -3 8 -2 29.6 13.2
 3 -8 2 27.6 18.1
 3 -8 2 38.4 16.4
 3 -8 2 41.9 13.6
 3 -8 2 60.99 15
 3 -8 2 49.5 11.4
 3 -8 2 54.89 21.8
 3 -8 2 39 12.3
 -4 8 -2 32.5 17.8
 4 -8 2 2.9 20.7
 4 -8 2 15.6 18.1
 4 -8 2 12.3 10.4
 4 -8 2 15.5 12.7
 4 -8 2 37.5 14.7
 4 -8 2 22.6 17.3
 -5 8 -2 31 19.4
 -5 8 -2 55.79 13
 5 -8 2 36.7 17.4
 5 -8 2 55.79 16
 5 -8 2 24 19.9
 5 -8 2 29.9 24
 5 -8 2 36.3 19.5
 5 -8 2 64.39 12.3
 5 -8 2 48.7 18.2
 -6 8 -2 115.89 30
 6 -8 2 156.28 23.1
 6 -8 2 116.39 14.7
 6 -8 2 96.89 16.5
 6 -8 2 101.19 25.9
 6 -8 2 140.89 21.1
 6 -8 2 86.39 29.3
 6 -8 2 117.09 16.4
 6 -8 2 87.59 25.6
 -7 8 -2 20.8 30.7
 -7 8 -2 -2.9 17.7
 7 -8 2 1.9 14.8
 7 -8 2 3 20.6
 7 -8 2 16 21.1
 7 -8 2 31 24.9
 7 -8 2 -56.79 28.1
 7 -8 2 26.4 14.5
 7 -8 2 22.5 19.2
 7 -8 2 9.1 24.4
 -8 8 -2 23.8 21.1
 -8 8 -2 -6.2 32.6
 8 -8 2 26.2 24.2
 8 -8 2 70.19 35.6
 8 -8 2 6.2 26.1
 8 -8 2 11.3 17.3
 8 -8 2 -40.6 23.7
 8 -8 2 51.99 27.5
 -9 8 -2 24.1 40.4
 -9 8 -2 -26.5 24.7
 9 -8 2 -1.2 41.6
 9 -8 2 7.1 21.3
 -10 8 -2 -57.99 43.1
 -10 8 -2 5.2 29.5
 10 -8 2 5.4 37.7
 10 -8 2 -10.6 45.9
 -11 8 -2 74.79 56.09
 11 -8 2 -97.49 54.79
 11 -8 2 13.1 47.4
 -12 8 -2 -60.39 65.99
 12 -8 2 -110.79 65.59
 12 -8 2 -160.68 54.49
 17 7 -2 -85.49 64.89
 17 7 -2 46.2 64.39
 17 7 -2 -40.3 60.99
 -17 -7 2 37.6 48
 -17 -7 2 127.19 68.59
 16 7 -2 -7.1 51.59
 16 7 -2 88.89 53.19
 16 7 -2 46.3 53.79
 16 7 -2 84.39 59.19
 -16 -7 2 55.29 56.89
 -16 -7 2 15.8 50.59
 15 7 -2 -89.29 42.9
 15 7 -2 29.9 45.9
 15 7 -2 -7.3 46.1
 15 7 -2 -15.9 43.3
 -15 -7 2 6.4 46.6
 -15 -7 2 16.7 32.8
 -15 -7 2 52.79 45
 14 7 -2 0.2 37.1
 14 7 -2 61.39 46.1
 14 7 -2 19.5 37
 14 7 -2 19.2 44.8
 -14 -7 2 9.2 25.8
 -14 -7 2 28.5 39.9
 -14 -7 2 11.1 33.4
 -14 -7 2 -0.6 26.4
 13 7 -2 -11.8 31.5
 13 7 -2 -12.1 32.8
 13 7 -2 97.59 40.2
 13 7 -2 -29.5 29.7
 -13 -7 2 -38.3 31.1
 -13 -7 2 30.1 28.9
 -13 -7 2 15.4 20.3
 -13 -7 2 37.1 27.4
 -13 -7 2 45.4 32.7
 -13 -7 2 0.6 31.5
 12 7 -2 33 28.3
 12 7 -2 5.3 27.8
 12 7 -2 -13.8 27.8
 12 7 -2 13.7 27.6
 -12 -7 2 12 25
 -12 -7 2 67.99 30.2
 -12 -7 2 33.5 28.8
 -12 -7 2 5 20.7
 -12 -7 2 9.6 17.9
 11 7 -2 248.98 33.6
 11 7 -2 146.39 35.2
 11 7 -2 245.08 32.5
 11 7 -2 259.37 37
 -11 -7 2 200.58 25.3
 -11 -7 2 248.58 34.2
 -11 -7 2 264.17 32.2
 -11 -7 2 223.88 36.3
 -11 -7 2 147.69 28.4
 10 7 -2 85.49 24.6
 10 7 -2 38 22
 10 7 -2 80.69 22.1
 10 7 -2 108.69 23.5
 -10 -7 2 80.39 24
 -10 -7 2 92.89 23
 -10 -7 2 100.19 18.2
 -10 -7 2 84.29 23.2
 -10 -7 2 96.09 18.6
 9 7 -2 49.5 18.7
 9 7 -2 43.3 17.5
 9 7 -2 6.9 16.6
 9 7 -2 24.4 20.4
 9 7 -2 16.1 18.9
 -9 -7 2 7.9 15.3
 -9 -7 2 7.3 18
 -9 -7 2 31.6 14.3
 -9 -7 2 25.7 17.2
 8 7 -2 180.58 24
 8 7 -2 157.68 22.7
 8 7 -2 151.78 25.6
 8 7 -2 171.88 27.9
 8 7 -2 177.88 21.9
 8 7 -2 213.28 26.2
 8 7 -2 171.18 31
 8 7 -2 133.69 22.4
 -8 -7 2 222.08 23
 -8 -7 2 185.38 23.8
 -8 -7 2 124.49 23.5
 -8 -7 2 170.18 23.3
 -8 -7 2 189.68 25.9
 -8 -7 2 195.18 28.6
 -8 -7 2 195.38 25.7
 7 7 -2 69.19 19.8
 7 7 -2 88.99 21.6
 7 7 -2 64.39 13.8
 7 7 -2 111.09 20.7
 7 7 -2 73.59 15.6
 7 7 -2 103.29 17.1
 7 7 -2 92.69 17
 7 7 -2 63.09 15.8
 7 7 -2 69.89 17.9
 -7 -7 2 78.99 17.5
 -7 -7 2 77.19 17.6
 -7 -7 2 97.59 15.2
 -7 -7 2 73.99 15.2
 -7 -7 2 67.59 20.1
 -7 -7 2 51.59 16.5
 -7 -7 2 91.89 16.4
 -7 -7 2 93.19 15.6
 -7 -7 2 83.59 18.2
 6 7 -2 267.17 28.7
 6 7 -2 302.97 25.4
 6 7 -2 263.97 23.3
 6 7 -2 219.98 29.7
 6 7 -2 260.77 29.5
 6 7 -2 257.27 25.1
 6 7 -2 272.27 26.3
 6 7 -2 290.27 26.5
 6 7 -2 271.47 27
 -6 -7 2 236.88 25.2
 -6 -7 2 222.08 26
 -6 -7 2 229.78 25.5
 -6 -7 2 243.98 29.4
 -6 -7 2 274.07 26.2
 -6 -7 2 237.08 28.7
 -6 -7 2 206.68 27.1
 -6 -7 2 251.07 23.5
 -6 -7 2 308.77 25.3
 5 7 -2 233.98 23
 5 7 -2 245.08 21.5
 5 7 -2 273.67 25.9
 5 7 -2 267.37 24.5
 5 7 -2 193.08 27
 5 7 -2 251.67 23
 5 7 -2 255.67 25
 5 7 -2 254.17 23.6
 5 7 -2 228.18 27.9
 -5 -7 2 229.48 26.5
 -5 -7 2 288.77 23
 -5 -7 2 260.47 26.8
 -5 -7 2 269.77 24.5
 -5 -7 2 248.38 22.5
 -5 -7 2 246.48 24.1
 -5 -7 2 254.07 25
 -5 -7 2 205.88 24.6
 -5 -7 2 258.57 24.1
 4 7 -2 -7.8 7.4
 4 7 -2 -3.2 10.3
 4 7 -2 -2.7 7.5
 4 7 -2 3.9 11.7
 4 7 -2 4.5 8.4
 4 7 -2 1.7 4.7
 4 7 -2 11 6.6
 4 7 -2 5.4 8.7
 4 7 -2 10.8 10.6
 4 7 -2 22.3 13.2
 -4 -7 2 10.6 9.1
 -4 -7 2 -13.5 11
 -4 -7 2 -4.3 6
 -4 -7 2 9.4 10.4
 -4 -7 2 1.6 8.9
 -4 -7 2 -7.4 8.7
 -4 -7 2 6.3 9.5
 -4 -7 2 -6.4 11.3
 -4 -7 2 1.8 8.7
 -4 -7 2 -0.8 7.5
 3 7 -2 -3 8.5
 3 7 -2 -8.6 7.7
 3 7 -2 -3.9 5.2
 3 7 -2 -0.8 10.1
 3 7 -2 -3.6 5.9
 3 7 -2 2.6 9.3
 3 7 -2 0.4 8
 3 7 -2 -2.7 6.6
 -3 -7 2 10.5 9.6
 -3 -7 2 5 5.6
 -3 -7 2 2.3 8.7
 -3 -7 2 -8.6 9.7
 -3 -7 2 -2 9.9
 -3 -7 2 0.7 6.9
 -3 -7 2 -4.7 7.4
 -3 -7 2 2.3 7.4
 -3 -7 2 -2.2 10.2
 -3 -7 2 4.1 8.2
 2 7 -2 522.05 38.2
 2 7 -2 509.75 36.9
 2 7 -2 475.15 37.9
 2 7 -2 540.75 37.3
 2 7 -2 510.15 33.8
 2 7 -2 531.65 35.2
 2 7 -2 528.35 36.1
 2 7 -2 523.65 36.4
 2 7 -2 513.35 35.1
 -2 -7 2 508.25 35.6
 -2 -7 2 520.75 37.6
 -2 -7 2 527.65 37.1
 -2 -7 2 535.75 36
 -2 -7 2 530.85 39.8
 -2 -7 2 527.45 33.7
 -2 -7 2 503.15 34.4
 -2 -7 2 498.55 38
 -2 -7 2 400.36 39.1
 -2 -7 2 557.14 39.4
 -2 -7 2 508.65 36.7
 1 7 -2 126.29 14.2
 1 7 -2 97.89 13.4
 1 7 -2 113.39 13.8
 1 7 -2 94.99 13.4
 1 7 -2 102.09 14.2
 -1 -7 2 119.29 16.3
 -1 -7 2 109.09 13.7
 -1 -7 2 96.69 10.2
 -1 -7 2 79.19 11.1
 -1 -7 2 108.99 13.9
 -1 -7 2 98.79 12.6
 -1 -7 2 86.69 14.9
 -1 -7 2 83.19 12.3
 -1 -7 2 88.69 11.9
 -1 -7 2 111.99 14.1
 0 7 -2 7.2 8.6
 0 7 -2 7.1 7.7
 0 7 -2 12.2 8.9
 0 7 -2 -7.3 7.1
 0 -7 2 -10.9 7.6
 0 -7 2 8 9.6
 0 -7 2 5.8 6.9
 0 -7 2 -11.2 8.7
 0 -7 2 7.4 5.4
 0 -7 2 0.5 10.3
 0 -7 2 4.3 5.6
 0 -7 2 -3.1 5.8
 0 -7 2 3.6 5.3
 0 -7 2 5.7 7.4
 -1 7 -2 245.98 20.5
 -1 7 -2 201.68 17.9
 -1 7 -2 220.18 18.2
 -1 7 -2 218.08 23.1
 1 -7 2 217.18 21.8
 1 -7 2 228.18 19.3
 1 -7 2 204.38 18.3
 1 -7 2 222.18 16.6
 1 -7 2 216.88 24
 1 -7 2 256.37 21.8
 1 -7 2 220.18 16.2
 1 -7 2 265.87 23.4
 -2 7 -2 -1.7 8.7
 -2 7 -2 -16.1 10.7
 2 -7 2 -6.1 10.3
 2 -7 2 0.5 9.8
 2 -7 2 -0.7 11.7
 2 -7 2 -6.4 7.4
 2 -7 2 1.2 12.2
 2 -7 2 -2.3 6.9
 -3 7 -2 23.5 10.5
 -3 7 -2 24.6 14.1
 3 -7 2 6.8 13.3
 3 -7 2 37 17.9
 3 -7 2 30.1 14.9
 3 -7 2 6.9 14.4
 3 -7 2 1.9 11.4
 3 -7 2 31.5 9
 3 -7 2 31.5 10.9
 -4 7 -2 59.49 18.2
 -4 7 -2 61.89 10.9
 4 -7 2 67.19 15.6
 4 -7 2 71.29 14.4
 4 -7 2 66.99 16.5
 4 -7 2 92.09 22.1
 4 -7 2 71.19 20.4
 4 -7 2 65.79 13.1
 4 -7 2 72.29 16.2
 4 -7 2 49 11.4
 -5 7 -2 24.4 17.6
 -5 7 -2 25.5 10.9
 5 -7 2 17.1 19.7
 5 -7 2 25.6 17.2
 5 -7 2 37.8 14.4
 5 -7 2 17.6 15.6
 5 -7 2 18.6 12
 5 -7 2 17.3 16.7
 -6 7 -2 81.69 25.1
 -6 7 -2 68.89 15.4
 6 -7 2 76.39 16.9
 6 -7 2 101.69 18.6
 6 -7 2 71.69 20.4
 6 -7 2 78.99 13.5
 6 -7 2 70.99 11.1
 6 -7 2 72.49 19.6
 6 -7 2 56.49 23.4
 -7 7 -2 4.1 15.1
 -7 7 -2 48.4 25.5
 7 -7 2 50.79 18.9
 7 -7 2 16.9 33.2
 7 -7 2 -5.8 13.3
 7 -7 2 12.2 19.3
 7 -7 2 -8.2 12.1
 7 -7 2 4.4 20.5
 -8 7 -2 -13.1 18.5
 -8 7 -2 -18.9 29.2
 8 -7 2 -11.1 15.4
 8 -7 2 46.8 15.3
 8 -7 2 -19.8 25.1
 8 -7 2 -4.5 21.6
 8 -7 2 3.8 21.6
 8 -7 2 64.59 31.6
 -9 7 -2 6.7 39
 -9 7 -2 -2.8 35.3
 -9 7 -2 65.89 24.9
 9 -7 2 31.7 33.5
 9 -7 2 3.3 32.7
 9 -7 2 57.19 20
 9 -7 2 32 36.4
 -10 7 -2 1.5 27.5
 -10 7 -2 68.59 41.7
 10 -7 2 -10.1 21.8
 -11 7 -2 19.7 35.2
 -11 7 -2 -26.9 48.6
 11 -7 2 -0.3 30.3
 11 -7 2 87.89 54.69
 -12 7 -2 63.19 60.39
 -12 7 -2 124.69 43.9
 12 -7 2 -67.99 56.49
 17 6 -2 8.1 64.69
 17 6 -2 -69.49 59.19
 17 6 -2 82.69 60.09
 17 6 -2 -84.99 58.39
 -17 -6 2 7.1 61.99
 -17 -6 2 60.49 45.7
 16 6 -2 -49.8 51.79
 16 6 -2 104.69 54.39
 16 6 -2 55.49 52.99
 16 6 -2 61.19 57.39
 -16 -6 2 -1.4 50.39
 -16 -6 2 0.4 51.09
 -16 -6 2 -58.99 36.7
 15 6 -2 8.2 43
 15 6 -2 43.8 46.8
 15 6 -2 64.49 48.1
 15 6 -2 8.7 44
 -15 -6 2 -39.6 40.7
 -15 -6 2 -6.6 50.99
 -15 -6 2 58.09 32.5
 14 6 -2 16 36.5
 14 6 -2 4.8 37
 14 6 -2 47.3 37.1
 14 6 -2 94.29 39.2
 -14 -6 2 -2 35.7
 -14 -6 2 27 37.6
 13 6 -2 97.59 33.8
 13 6 -2 78.49 36.2
 13 6 -2 1.5 32.2
 13 6 -2 12.9 31.3
 -13 -6 2 83.29 33.2
 -13 -6 2 67.29 32.6
 -13 -6 2 47.2 32.5
 -13 -6 2 86.49 24.7
 12 6 -2 19.9 26.3
 12 6 -2 13.7 25.4
 12 6 -2 1.4 30.7
 12 6 -2 -19.7 24.9
 -12 -6 2 -16.9 28
 -12 -6 2 -17.2 16.1
 -12 -6 2 24.5 28.1
 -12 -6 2 9.4 26
 -12 -6 2 13.8 19.3
 11 6 -2 45.2 23
 11 6 -2 -3.2 22.3
 11 6 -2 9 22.9
 11 6 -2 -6.5 21.8
 11 6 -2 14.3 15.6
 -11 -6 2 -2.1 18.7
 -11 -6 2 1.7 17.4
 -11 -6 2 28.5 24.3
 -11 -6 2 10.1 14.5
 -11 -6 2 5.1 20.5
 10 6 -2 120.39 17.4
 10 6 -2 121.99 24.4
 10 6 -2 53.69 24.6
 10 6 -2 104.69 23.7
 10 6 -2 85.09 25.4
 -10 -6 2 128.99 18.2
 -10 -6 2 138.09 21
 -10 -6 2 107.19 22.5
 -10 -6 2 132.09 27.3
 -10 -6 2 69.99 20.3
 9 6 -2 0.5 16.2
 9 6 -2 -1.6 17.1
 9 6 -2 -1.2 15.6
 9 6 -2 10.9 17.9
 9 6 -2 -6.9 12.1
 9 6 -2 -19.5 26.1
 9 6 -2 15.9 16.1
 -9 -6 2 11 16.9
 -9 -6 2 7.4 16.1
 -9 -6 2 -4.2 12.1
 -9 -6 2 25.5 15.4
 8 6 -2 9.9 14.5
 8 6 -2 5.2 17
 8 6 -2 -4.7 13.7
 8 6 -2 12.8 14.8
 8 6 -2 3.9 13.2
 8 6 -2 13.9 13.2
 8 6 -2 1.1 13.7
 8 6 -2 -0.2 15.1
 8 6 -2 -3.9 21
 -8 -6 2 1.5 16.9
 -8 -6 2 -11.5 10.9
 -8 -6 2 10.4 18.2
 -8 -6 2 -0.7 13.2
 -8 -6 2 25.5 20.8
 -8 -6 2 10.9 16.3
 -8 -6 2 7.2 11.4
 -8 -6 2 16.8 12.3
 -8 -6 2 -10.6 16.5
 7 6 -2 239.48 27.8
 7 6 -2 274.27 30.9
 7 6 -2 257.17 26.1
 7 6 -2 187.68 27.2
 7 6 -2 228.98 26.4
 7 6 -2 269.07 26.1
 7 6 -2 199.48 25.3
 7 6 -2 229.68 24.2
 7 6 -2 213.18 24
 -7 -6 2 220.38 25.7
 -7 -6 2 217.08 27.9
 -7 -6 2 220.88 26.6
 -7 -6 2 199.08 27.9
 -7 -6 2 201.18 26.5
 -7 -6 2 254.67 24.6
 -7 -6 2 235.28 25.6
 -7 -6 2 242.78 23.2
 6 6 -2 137.19 18.9
 6 6 -2 122.39 17.2
 6 6 -2 133.99 19.5
 6 6 -2 146.09 18.4
 6 6 -2 122.59 19.4
 6 6 -2 140.59 16.2
 6 6 -2 138.59 20.1
 6 6 -2 104.99 20
 6 6 -2 164.48 19.3
 -6 -6 2 132.59 17.4
 -6 -6 2 142.69 20.3
 -6 -6 2 176.18 21.9
 -6 -6 2 163.98 20
 -6 -6 2 124.79 16.7
 -6 -6 2 141.19 18.4
 -6 -6 2 97.89 17
 -6 -6 2 136.79 18.1
 5 6 -2 5.6 9.1
 5 6 -2 -2.3 8.3
 5 6 -2 0.7 10
 5 6 -2 -0.2 10.3
 5 6 -2 -2.1 8.9
 5 6 -2 -9.9 12.3
 5 6 -2 1.4 9.3
 5 6 -2 8.9 7.8
 5 6 -2 6.6 9.5
 -5 -6 2 5 9.6
 -5 -6 2 9.8 10.2
 -5 -6 2 -12.7 9
 -5 -6 2 2.3 11.6
 -5 -6 2 2.7 10.3
 -5 -6 2 5.5 8
 -5 -6 2 1.4 7
 -5 -6 2 6.1 8.8
 4 6 -2 154.58 16.7
 4 6 -2 103.89 14.7
 4 6 -2 127.99 15
 4 6 -2 130.79 17.4
 4 6 -2 111.99 14.8
 4 6 -2 140.99 17.2
 4 6 -2 122.29 13.7
 4 6 -2 111.79 14.9
 4 6 -2 166.08 19.1
 -4 -6 2 129.19 16.3
 -4 -6 2 123.39 16.1
 -4 -6 2 118.49 17.3
 -4 -6 2 121.99 13.8
 -4 -6 2 118.09 16
 -4 -6 2 152.98 17
 -4 -6 2 125.99 17.8
 -4 -6 2 138.69 15
 -4 -6 2 147.29 15.8
 3 6 -2 16.4 8.8
 3 6 -2 9.3 8.6
 3 6 -2 13.5 4.6
 3 6 -2 -1.8 6.7
 3 6 -2 5.4 9.8
 3 6 -2 -2 7
 3 6 -2 -5.5 6
 -3 -6 2 2.2 5.1
 -3 -6 2 13.5 8.2
 -3 -6 2 -12.3 6.3
 -3 -6 2 12.3 7
 -3 -6 2 7.9 7.5
 -3 -6 2 14.3 8.9
 -3 -6 2 7.6 9
 -3 -6 2 7.2 7.4
 2 6 -2 2196.18 140.69
 2 6 -2 2146.49 139.79
 2 6 -2 2224.08 141.59
 2 6 -2 2153.98 140.39
 2 6 -2 2271.17 142.29
 2 6 -2 2244.08 140.79
 2 6 -2 2226.38 142.29
 2 6 -2 2221.68 140.59
 -2 -6 2 2135.89 140.09
 -2 -6 2 2127.09 142.09
 -2 -6 2 2257.27 142.79
 -2 -6 2 2301.37 141.79
 -2 -6 2 2232.38 142.39
 -2 -6 2 2174.38 140.89
 -2 -6 2 2204.58 140.89
 -2 -6 2 2193.28 139.69
 -2 -6 2 2249.18 141.59
 -2 -6 2 2199.78 141.49
 1 6 -2 1576.14 101.49
 1 6 -2 1531.75 100.09
 1 6 -2 1581.84 102.09
 1 6 -2 1596.34 102.69
 1 6 -2 1614.14 102.09
 1 6 -2 1539.15 101.79
 1 6 -2 1578.84 99.89
 1 6 -2 1556.74 99.79
 -1 -6 2 1535.05 100.89
 -1 -6 2 1664.03 102.49
 -1 -6 2 1672.53 100.49
 -1 -6 2 1625.44 103.49
 -1 -6 2 1488.05 101.69
 -1 -6 2 1543.25 102.49
 -1 -6 2 1568.24 100.89
 -1 -6 2 1543.05 101.19
 -1 -6 2 1521.45 102.89
 -1 -6 2 1598.24 101.69
 -1 -6 2 1637.44 102.09
 0 6 -2 32.2 7.7
 0 6 -2 35 7.8
 0 6 -2 31.5 9.2
 0 6 -2 41.8 9.1
 0 -6 2 23.2 6.9
 0 -6 2 24.6 5.8
 0 -6 2 33.9 7.8
 0 -6 2 38.7 6.4
 0 -6 2 32.8 5.6
 0 -6 2 39.2 9.1
 0 -6 2 30 10.8
 0 -6 2 30.4 9.4
 0 -6 2 30.8 9
 -1 6 -2 44.2 7.1
 -1 6 -2 55.79 9.2
 -1 6 -2 36.1 6.7
 -1 6 -2 23.3 10
 1 -6 2 58.19 11.1
 1 -6 2 46.6 7.7
 1 -6 2 61.49 12.9
 1 -6 2 57.59 10.3
 1 -6 2 36.9 8.9
 -2 6 -2 5.1 7.4
 -2 6 -2 3.4 8.8
 -2 6 -2 13 10.3
 2 -6 2 4.9 8
 2 -6 2 -2.6 10.1
 2 -6 2 -20.8 8.9
 2 -6 2 4.7 9.6
 2 -6 2 -3.7 6.1
 2 -6 2 0.9 5.8
 -3 6 -2 848.52 56.19
 -3 6 -2 903.81 61.49
 -3 6 -2 821.02 59.19
 3 -6 2 828.92 57.59
 3 -6 2 852.51 59.79
 3 -6 2 878.41 56.09
 3 -6 2 878.21 60.79
 3 -6 2 836.72 57.79
 3 -6 2 886.61 61.89
 3 -6 2 821.32 62.09
 -4 6 -2 627.74 45.7
 -4 6 -2 566.64 39.6
 -4 6 -2 533.65 41.8
 4 -6 2 532.85 43.2
 4 -6 2 589.14 44.6
 4 -6 2 565.74 46.6
 4 -6 2 562.14 41.1
 4 -6 2 549.65 44.7
 4 -6 2 555.74 38.2
 -5 6 -2 31.3 10
 -5 6 -2 11.5 11.4
 -5 6 -2 40.9 16.6
 5 -6 2 24.3 10.8
 5 -6 2 22.1 14.9
 5 -6 2 46.9 11.8
 5 -6 2 31.5 8.5
 5 -6 2 34.9 17.2
 -6 6 -2 -8 11.9
 -6 6 -2 -13.3 10.7
 -6 6 -2 54.09 19.2
 6 -6 2 -10.5 12.3
 6 -6 2 -3.8 13.5
 6 -6 2 6.7 19.1
 6 -6 2 8.8 7.7
 6 -6 2 14.5 15.6
 6 -6 2 8 10.1
 6 -6 2 4.6 9.1
 -7 6 -2 18.1 14.6
 -7 6 -2 13.9 22.8
 -7 6 -2 -11.2 18.4
 -7 6 -2 30.2 10.9
 7 -6 2 30.8 17.6
 7 -6 2 40.1 18.8
 7 -6 2 7.1 22.8
 7 -6 2 22.8 11.1
 7 -6 2 16.9 11.9
 7 -6 2 43.6 12.7
 -8 6 -2 88.09 29
 -8 6 -2 22.3 13.7
 -8 6 -2 38.9 18.8
 -8 6 -2 55.49 24.2
 8 -6 2 63.19 14.9
 8 -6 2 10.6 20.7
 8 -6 2 55.29 21.2
 8 -6 2 58.89 36.1
 8 -6 2 35 14.9
 8 -6 2 50.69 21
 -9 6 -2 47.1 16.9
 -9 6 -2 26.9 22.1
 -9 6 -2 68.89 37.1
 9 -6 2 101.19 28.3
 9 -6 2 30.1 18.3
 9 -6 2 28.7 18.2
 9 -6 2 47.8 30.8
 9 -6 2 46.1 24.7
 -10 6 -2 5.2 36.7
 -10 6 -2 21.9 26.3
 10 -6 2 -14.9 20.4
 10 -6 2 23.7 38
 -11 6 -2 16.9 31.3
 -11 6 -2 61.59 46.5
 11 -6 2 87.59 45.4
 11 -6 2 82.49 26.4
 -12 6 -2 55.49 38.4
 -12 6 -2 63.69 55.19
 12 -6 2 2.4 51.79
 12 -6 2 -9.4 28.1
 -13 6 -2 31.2 48.5
 -13 6 -2 16.9 64.09
 13 -6 2 16.2 62.89
 17 5 -2 39.1 55.59
 -17 -5 2 -64.09 43.7
 -17 -5 2 81.39 58.49
 16 5 -2 18.3 53.29
 16 5 -2 30.9 51.09
 16 5 -2 -10.5 55.49
 16 5 -2 133.59 51.79
 -16 -5 2 34.1 48.3
 -16 -5 2 23.8 54.09
 -16 -5 2 13.5 37.8
 15 5 -2 -22.7 38.7
 15 5 -2 0.2 44.4
 15 5 -2 1 44.8
 15 5 -2 92.19 45.5
 -15 -5 2 -37.8 39.7
 -15 -5 2 -0.3 46.2
 -15 -5 2 3.8 31.8
 14 5 -2 -3.7 35.3
 14 5 -2 -10.4 38.2
 14 5 -2 26.1 36.5
 -14 -5 2 -63.79 35.7
 -14 -5 2 32.9 35.4
 -14 -5 2 48.3 27.3
 13 5 -2 29.3 30.6
 13 5 -2 70.99 35.8
 13 5 -2 34.3 30.7
 13 5 -2 -3.6 31.9
 -13 -5 2 14.6 29.9
 -13 -5 2 27.9 22.4
 -13 -5 2 -11.8 30
 -13 -5 2 2.1 32.5
 12 5 -2 24.3 26.6
 12 5 -2 -19.9 25.7
 12 5 -2 1.8 29.4
 12 5 -2 11.8 25.4
 -12 -5 2 26.9 19.3
 -12 -5 2 -40 25.8
 -12 -5 2 -17.9 22.4
 -12 -5 2 -3.6 22.6
 11 5 -2 138.19 21.3
 11 5 -2 84.59 25.7
 11 5 -2 78.59 27.9
 11 5 -2 60.99 27.3
 11 5 -2 146.59 28.2
 -11 -5 2 119.69 28
 -11 -5 2 129.59 21.3
 -11 -5 2 57.79 26.5
 -11 -5 2 70.79 23.2
 -11 -5 2 108.09 18.1
 10 5 -2 15.8 13.4
 10 5 -2 29.1 29.1
 10 5 -2 39.5 22.8
 10 5 -2 2.4 17.9
 10 5 -2 -12.8 19.1
 10 5 -2 1.9 16.8
 -10 -5 2 27.1 18.3
 -10 -5 2 0.9 15.9
 -10 -5 2 11.8 12.5
 -10 -5 2 24.6 20.7
 -10 -5 2 6.2 13.8
 9 5 -2 -9.1 16.9
 9 5 -2 -29.3 15.5
 9 5 -2 8.7 15.7
 9 5 -2 30.6 15.5
 9 5 -2 39.6 23.6
 9 5 -2 20.7 17.7
 9 5 -2 22.6 11.4
 -9 -5 2 21.8 18.2
 -9 -5 2 14.4 20.4
 -9 -5 2 -0.1 14
 -9 -5 2 16 13.7
 8 5 -2 13.2 13.2
 8 5 -2 12.4 15.1
 8 5 -2 2.4 12.8
 8 5 -2 10.3 13.8
 8 5 -2 5.5 8.7
 8 5 -2 -5.6 13.5
 8 5 -2 5.8 15
 8 5 -2 16.8 13.2
 8 5 -2 31.7 20.4
 -8 -5 2 12.3 11.3
 -8 -5 2 -2.4 17.2
 -8 -5 2 2.2 11.9
 -8 -5 2 9.8 15.2
 -8 -5 2 5.4 15.7
 -8 -5 2 17.5 11.7
 -8 -5 2 29.5 17.5
 7 5 -2 151.88 21.7
 7 5 -2 145.59 19.4
 7 5 -2 149.88 21
 7 5 -2 155.68 21
 7 5 -2 128.69 18.1
 7 5 -2 171.98 20.2
 7 5 -2 148.79 21.6
 7 5 -2 135.79 23.4
 7 5 -2 136.19 18.4
 -7 -5 2 157.98 18.1
 -7 -5 2 111.39 19.9
 -7 -5 2 132.99 18
 -7 -5 2 196.98 24.3
 -7 -5 2 135.89 19.5
 -7 -5 2 113.69 18.4
 -7 -5 2 135.69 19.8
 -7 -5 2 118.59 22.7
 6 5 -2 19.1 9.5
 6 5 -2 41.3 13.3
 6 5 -2 20.3 9.9
 6 5 -2 21.8 9.5
 6 5 -2 39.5 11.2
 6 5 -2 16.4 10.9
 6 5 -2 8.3 10.1
 6 5 -2 18.1 10.4
 6 5 -2 5.5 13.6
 -6 -5 2 21.6 9.7
 -6 -5 2 27.2 12.1
 -6 -5 2 29.3 12.8
 -6 -5 2 22.4 8.8
 -6 -5 2 23.3 11.2
 -6 -5 2 6.8 9.2
 -6 -5 2 19.7 14
 -6 -5 2 19.2 10.5
 5 5 -2 27.6 9.2
 5 5 -2 15.6 10.1
 5 5 -2 34.6 9.9
 5 5 -2 26.2 13
 5 5 -2 31.9 9.3
 5 5 -2 6.5 9.3
 5 5 -2 45.2 11.5
 5 5 -2 36.9 8.3
 5 5 -2 35.4 11.3
 -5 -5 2 28.4 10.2
 -5 -5 2 37.6 8.9
 -5 -5 2 14.2 10.4
 -5 -5 2 20.2 8.9
 -5 -5 2 34.3 10.5
 -5 -5 2 42.2 12.2
 -5 -5 2 45.6 12.8
 -5 -5 2 42.4 9.3
 4 5 -2 12.9 7.6
 4 5 -2 15.6 7.8
 4 5 -2 31.5 8.1
 4 5 -2 11.7 7.2
 4 5 -2 17.8 10.3
 4 5 -2 13.7 9.1
 4 5 -2 14.3 7.4
 -4 -5 2 17.5 9.8
 -4 -5 2 17 8.9
 -4 -5 2 29.1 8.3
 -4 -5 2 6.8 8
 -4 -5 2 25.8 7
 -4 -5 2 19.1 7.6
 -4 -5 2 18.8 6.4
 -4 -5 2 15.2 7.6
 -4 -5 2 17.3 9.2
 3 5 -2 745.33 48
 3 5 -2 764.02 49.7
 3 5 -2 712.83 48.6
 3 5 -2 689.53 49.5
 3 5 -2 735.63 48.6
 3 5 -2 679.83 50.19
 3 5 -2 745.33 49.99
 -3 -5 2 750.82 48.9
 -3 -5 2 738.13 49.7
 -3 -5 2 733.63 48.6
 -3 -5 2 765.62 49.3
 -3 -5 2 744.13 49.7
 -3 -5 2 741.93 49.2
 -3 -5 2 692.93 48.2
 -3 -5 2 710.33 47.6
 -3 -5 2 684.43 49.8
 -3 -5 2 692.73 50.79
 2 5 -2 2565.74 162.78
 2 5 -2 2636.34 164.48
 2 5 -2 2645.04 163.18
 2 5 -2 2442.26 164.48
 2 5 -2 2518.35 164.18
 2 5 -2 2604.44 164.68
 2 5 -2 2593.64 162.78
 2 5 -2 2423.96 163.98
 2 5 -2 2528.65 163.28
 2 5 -2 2599.24 163.38
 -2 -5 2 2665.23 164.18
 -2 -5 2 2547.95 164.08
 -2 -5 2 2687.43 164.48
 -2 -5 2 2526.35 163.48
 -2 -5 2 2588.74 164.08
 -2 -5 2 2452.65 164.58
 -2 -5 2 2701.43 163.98
 -2 -5 2 2464.75 162.98
 -2 -5 2 2687.83 164.88
 -2 -5 2 2578.34 162.68
 1 5 -2 6 5
 1 5 -2 1 6.5
 1 5 -2 -1.8 3.4
 1 5 -2 9 6.4
 1 5 -2 4.4 4
 1 5 -2 5.2 5.3
 1 5 -2 2.1 3.4
 1 5 -2 1.4 5
 -1 -5 2 3.4 5.4
 -1 -5 2 3.6 7.3
 -1 -5 2 -3 4.3
 -1 -5 2 7.2 6.2
 -1 -5 2 7.7 3.4
 -1 -5 2 1.6 4.1
 -1 -5 2 11 6.3
 -1 -5 2 1.5 5
 -1 -5 2 3.8 4.1
 -1 -5 2 6.5 5.2
 0 5 -2 1092.39 71.79
 0 5 -2 1017.9 71.09
 0 5 -2 1064.59 72.99
 0 5 -2 1112.09 70.69
 0 -5 2 1054.79 69.79
 0 -5 2 1149.69 70.59
 0 -5 2 987 70.19
 0 -5 2 1147.39 71.79
 0 -5 2 1196.28 72.19
 0 -5 2 1202.18 72.99
 0 -5 2 1056.49 69.49
 0 -5 2 1079.89 70.29
 0 -5 2 1063.49 69.69
 -1 5 -2 12.2 5.8
 -1 5 -2 19.9 12.5
 -1 5 -2 21.7 8.8
 -1 5 -2 16.8 4.1
 -1 5 -2 22.2 4.7
 1 -5 2 26.9 8.4
 1 -5 2 23.4 5.7
 1 -5 2 29.6 9
 1 -5 2 26 8.3
 1 -5 2 31.2 7.8
 1 -5 2 29.1 5.8
 -2 5 -2 517.45 35.4
 -2 5 -2 456.95 32.7
 -2 5 -2 484.05 36.3
 2 -5 2 470.45 32.1
 2 -5 2 505.45 35.4
 2 -5 2 492.55 35.9
 2 -5 2 445.06 33.4
 2 -5 2 516.55 35.6
 2 -5 2 448.56 33.3
 2 -5 2 475.85 31.4
 -3 5 -2 9.8 8.1
 -3 5 -2 8 10.4
 -3 5 -2 6.5 5.9
 3 -5 2 -4.3 10.9
 3 -5 2 12.5 5.4
 3 -5 2 16.3 9.1
 3 -5 2 3.1 6.5
 3 -5 2 23.9 9.6
 3 -5 2 16.2 10.9
 -4 5 -2 21.8 9
 -4 5 -2 -8.9 10.6
 -4 5 -2 5.2 7.3
 4 -5 2 1.2 6.8
 4 -5 2 -4.8 10.6
 4 -5 2 -1.9 7
 4 -5 2 -10.9 11.2
 4 -5 2 0.2 13.6
 -5 5 -2 176.28 23.2
 -5 5 -2 140.69 17.2
 -5 5 -2 98.89 12.3
 -5 5 -2 135.79 16.2
 5 -5 2 144.09 15.1
 5 -5 2 114.09 13.2
 5 -5 2 130.59 16.3
 5 -5 2 169.78 22.1
 5 -5 2 134.99 18
 5 -5 2 89.49 13
 5 -5 2 125.89 20.9
 -6 5 -2 10 8.4
 -6 5 -2 27.4 16.3
 -6 5 -2 33 12.8
 -6 5 -2 33.2 12
 -6 5 -2 13.6 13.4
 6 -5 2 20.3 6.9
 6 -5 2 15 13.7
 6 -5 2 13.4 10.1
 6 -5 2 13.1 8.4
 6 -5 2 12.9 12
 6 -5 2 23.7 17.8
 6 -5 2 9.1 9.4
 -7 5 -2 47.2 21
 -7 5 -2 4.3 17.3
 -7 5 -2 -7.8 13.8
 -7 5 -2 46.6 15
 -7 5 -2 13 11.2
 7 -5 2 27.5 10
 7 -5 2 45.7 21.7
 7 -5 2 34.1 15.2
 7 -5 2 20.1 11.3
 7 -5 2 23.7 11.2
 7 -5 2 22 15.4
 -8 5 -2 -15.6 21.1
 -8 5 -2 -20.5 13.6
 -8 5 -2 6.6 23.7
 -8 5 -2 -13.5 16.2
 8 -5 2 12.8 13.2
 8 -5 2 -13.6 20.7
 8 -5 2 17.4 17.7
 8 -5 2 6.4 17.3
 8 -5 2 -3.1 18
 8 -5 2 5.3 23.1
 8 -5 2 -6.5 11.9
 -9 5 -2 84.89 24.8
 -9 5 -2 68.09 30.4
 -9 5 -2 60.49 17.7
 9 -5 2 104.49 17.6
 9 -5 2 69.29 18.3
 9 -5 2 86.59 18.6
 9 -5 2 101.39 17.8
 9 -5 2 58.19 26.3
 9 -5 2 33.9 33.3
 -10 5 -2 8.8 26.4
 -10 5 -2 27.8 54.69
 -10 5 -2 43.2 24.8
 10 -5 2 1.3 20.9
 10 -5 2 13.8 19.6
 10 -5 2 12.8 33.3
 10 -5 2 54.39 25.7
 -11 5 -2 24.6 29.5
 -11 5 -2 53.89 41.3
 11 -5 2 -17.5 23.7
 11 -5 2 7.2 22.2
 -12 5 -2 -25.4 34.7
 -12 5 -2 -24.8 48.5
 12 -5 2 -21.3 44.6
 12 -5 2 -43.5 27.4
 12 -5 2 8.8 27.1
 -13 5 -2 12.9 42.5
 -13 5 -2 -57.89 57.49
 13 -5 2 -32.2 33.4
 13 -5 2 -8.8 52.39
 -14 5 -2 99.49 56.79
 14 -5 2 22.1 71.49
 16 4 -2 18.3 50.69
 16 4 -2 -2.5 52.89
 16 4 -2 -51.49 56.59
 16 4 -2 -1 52.09
 -16 -4 2 -51.99 38
 -16 -4 2 11.1 47.7
 15 4 -2 15.8 40.8
 15 4 -2 -0.6 63.79
 15 4 -2 30.8 39.7
 15 4 -2 -32.2 43.9
 -15 -4 2 14.2 31.2
 -15 -4 2 44.7 38.6
 -15 -4 2 -18.2 44
 14 4 -2 -62.79 31.5
 14 4 -2 -0.2 36.6
 14 4 -2 8.5 36.9
 14 4 -2 -2.5 36.5
 -14 -4 2 1.5 25.2
 -14 -4 2 -24.2 36.2
 -14 -4 2 30.2 33.7
 13 4 -2 -30.3 27.2
 13 4 -2 -5.8 28.6
 13 4 -2 36.3 29.5
 -13 -4 2 -1.9 21.3
 -13 -4 2 -11.4 31.2
 -13 -4 2 11.8 28.7
 12 4 -2 260.07 37.2
 12 4 -2 287.47 37.1
 12 4 -2 243.18 39.3
 12 4 -2 239.28 42.1
 -12 -4 2 268.27 37.2
 -12 -4 2 207.08 33
 -12 -4 2 256.27 32.1
 -12 -4 2 215.48 36.9
 11 4 -2 76.79 21.4
 11 4 -2 73.79 39
 11 4 -2 89.29 25.7
 11 4 -2 27.2 22.7
 11 4 -2 74.09 25.6
 11 4 -2 82.99 23.6
 -11 -4 2 71.69 22.1
 -11 -4 2 99.59 23.3
 -11 -4 2 95.29 27.3
 -11 -4 2 78.09 18.7
 10 4 -2 178.78 29.2
 10 4 -2 142.19 26.9
 10 4 -2 186.48 28.5
 10 4 -2 155.28 25.1
 10 4 -2 130.29 33.4
 10 4 -2 163.78 22.1
 -10 -4 2 227.78 30.7
 -10 -4 2 187.28 28.5
 -10 -4 2 192.68 23.9
 -10 -4 2 127.39 23.1
 -10 -4 2 161.58 25
 9 4 -2 -12.7 13.3
 9 4 -2 6.5 17.3
 9 4 -2 -1.3 11.6
 9 4 -2 17.7 15.3
 9 4 -2 -8.7 16.6
 9 4 -2 -6.2 15.2
 9 4 -2 -4.5 22.2
 -9 -4 2 -19.8 15.8
 -9 -4 2 33.7 21
 -9 -4 2 -1.2 12.4
 -9 -4 2 -15.5 13.1
 -9 -4 2 -24 18.2
 8 4 -2 824.82 55.89
 8 4 -2 907.31 61.39
 8 4 -2 844.62 59.69
 8 4 -2 747.53 60.69
 8 4 -2 776.62 59.19
 8 4 -2 855.21 61.69
 8 4 -2 805.02 59.19
 8 4 -2 687.93 63.39
 8 4 -2 812.92 58.99
 8 4 -2 840.42 59.69
 -8 -4 2 869.91 59.79
 -8 -4 2 756.12 62.59
 -8 -4 2 870.41 59.59
 -8 -4 2 763.42 60.39
 -8 -4 2 870.41 62.69
 -8 -4 2 769.82 62.89
 -8 -4 2 813.92 61.39
 -8 -4 2 913.01 58.29
 7 4 -2 60.49 18.4
 7 4 -2 98.29 18
 7 4 -2 92.49 14.6
 7 4 -2 93.39 14.9
 7 4 -2 65.09 14.3
 7 4 -2 92.89 17
 7 4 -2 107.49 18.6
 7 4 -2 93.79 11.4
 7 4 -2 80.29 14.9
 7 4 -2 103.89 16.4
 -7 -4 2 118.99 18.7
 -7 -4 2 82.59 17.8
 -7 -4 2 82.99 16.5
 -7 -4 2 64.29 13.6
 -7 -4 2 85.19 13.9
 -7 -4 2 75.59 14.4
 -7 -4 2 107.59 19
 -7 -4 2 80.99 17.3
 6 4 -2 3.4 9.7
 6 4 -2 7.4 8.8
 6 4 -2 9.4 9.5
 6 4 -2 6.8 6.9
 6 4 -2 14 9.4
 6 4 -2 27.2 11.7
 6 4 -2 5.7 10.5
 6 4 -2 2.2 13.1
 6 4 -2 28.2 10.6
 6 4 -2 14.4 10.1
 -6 -4 2 14.4 9.3
 -6 -4 2 8.9 11.6
 -6 -4 2 16.3 11
 -6 -4 2 14 8.4
 -6 -4 2 11.6 12.2
 -6 -4 2 22.2 11.2
 -6 -4 2 5.9 7.5
 -6 -4 2 11.3 12.9
 5 4 -2 52.89 10.2
 5 4 -2 55.59 11
 5 4 -2 56.79 10.3
 5 4 -2 54.19 11
 5 4 -2 55.59 13.4
 5 4 -2 41.9 9.9
 5 4 -2 45.4 9.7
 5 4 -2 52.09 11.2
 5 4 -2 60.39 12.2
 -5 -4 2 64.39 9.9
 -5 -4 2 43.5 11.6
 -5 -4 2 37.6 10
 -5 -4 2 52.29 12.2
 -5 -4 2 51.09 10.9
 -5 -4 2 49.7 10.4
 -5 -4 2 46.8 9.6
 -5 -4 2 52.69 11
 4 4 -2 370.96 27.1
 4 4 -2 341.37 28.2
 4 4 -2 344.57 26
 4 4 -2 346.97 28.4
 4 4 -2 380.06 26.8
 4 4 -2 350.36 26
 4 4 -2 367.66 27.6
 4 4 -2 331.17 27.3
 -4 -4 2 391.06 27
 -4 -4 2 338.17 28.1
 -4 -4 2 352.36 26.5
 -4 -4 2 342.27 27.5
 -4 -4 2 277.17 30.7
 -4 -4 2 374.26 27.3
 -4 -4 2 352.66 26.2
 -4 -4 2 330.47 34.5
 3 4 -2 954.2 60.69
 3 4 -2 946.71 60.29
 3 4 -2 899.61 60.39
 3 4 -2 929.71 60.99
 3 4 -2 866.91 61.09
 3 4 -2 931.61 60.89
 3 4 -2 941.61 61.99
 3 4 -2 908.51 59.89
 -3 -4 2 900.51 60.69
 -3 -4 2 940.61 60.49
 -3 -4 2 909.41 60.19
 -3 -4 2 943.71 60.79
 -3 -4 2 928.61 60.49
 -3 -4 2 935.51 61.49
 -3 -4 2 877.01 59.59
 -3 -4 2 905.71 61.59
 -3 -4 2 897.91 60.29
 -3 -4 2 886.81 60.49
 2 4 -2 2492.45 152.48
 2 4 -2 2446.76 152.58
 2 4 -2 2345.57 151.88
 2 4 -2 2466.45 152.08
 2 4 -2 2469.05 151.68
 2 4 -2 2259.87 152.68
 2 4 -2 2259.07 152.38
 2 4 -2 2304.17 150.68
 2 4 -2 2536.75 151.58
 2 4 -2 2380.06 151.78
 -2 -4 2 2370.76 152.48
 -2 -4 2 2314.27 151.78
 -2 -4 2 2269.07 151.58
 -2 -4 2 2490.85 152.08
 -2 -4 2 2460.35 152.68
 -2 -4 2 2221.78 152.78
 -2 -4 2 2429.66 152.18
 -2 -4 2 2503.75 152.18
 -2 -4 2 2402.16 152.28
 -2 -4 2 2370.36 151.28
 1 4 -2 0.4 3.9
 1 4 -2 -0.1 3.4
 1 4 -2 2.1 3.3
 1 4 -2 -3.8 5.9
 1 4 -2 -1.6 4.5
 1 4 -2 -3.4 3.5
 1 4 -2 3.6 4.1
 1 4 -2 6.2 5.6
 -1 -4 2 1.5 3.4
 -1 -4 2 2.5 4.1
 -1 -4 2 1.2 5.3
 -1 -4 2 2.8 3.9
 -1 -4 2 -1.3 3.5
 -1 -4 2 3 5.8
 -1 -4 2 4.6 4.6
 -1 -4 2 -2.3 4.9
 -1 -4 2 -3.1 3.9
 -1 -4 2 -4.3 5.1
 0 4 -2 1255.87 87.09
 0 4 -2 1358.96 88.09
 0 4 -2 1405.76 88.39
 0 4 -2 1352.06 88.59
 0 4 -2 1341.57 87.09
 0 4 -2 1418.66 86.99
 0 -4 2 1414.96 87.09
 0 -4 2 1333.47 87.09
 0 -4 2 1475.25 88.69
 0 -4 2 1318.47 86.59
 0 -4 2 1357.16 86.49
 0 -4 2 1438.06 88.09
 0 -4 2 1213.08 86.99
 0 -4 2 1439.56 88.89
 0 -4 2 1360.06 86.29
 -1 4 -2 6.1 6.3
 -1 4 -2 4.5 4
 -1 4 -2 10.4 5.9
 1 -4 2 5.9 3.6
 1 -4 2 -5.3 6.6
 1 -4 2 4.4 6.5
 1 -4 2 -0.1 6.1
 1 -4 2 3.9 3.9
 -2 4 -2 89.59 11.9
 -2 4 -2 72.59 8.5
 -2 4 -2 83.39 8.7
 2 -4 2 75.69 10.4
 2 -4 2 64.79 9.6
 2 -4 2 85.29 11.5
 2 -4 2 77.69 11.4
 2 -4 2 74.99 7.5
 2 -4 2 79.89 7.5
 2 -4 2 92.99 12.4
 2 -4 2 109.79 13.3
 -3 4 -2 1048.1 68.79
 -3 4 -2 1008.3 65.59
 -3 4 -2 992.6 66.89
 3 -4 2 1021.1 67.89
 3 -4 2 966.4 65.29
 3 -4 2 1008.4 65.09
 3 -4 2 1007.8 64.19
 3 -4 2 1012.8 67.29
 3 -4 2 978.9 68.09
 -4 4 -2 84.99 12.7
 -4 4 -2 63.69 8.3
 -4 4 -2 74.09 9.4
 -4 4 -2 86.19 15.2
 -4 4 -2 89.89 11.1
 4 -4 2 69.39 12.8
 4 -4 2 82.09 14.6
 4 -4 2 78.99 10.6
 4 -4 2 58.99 13.9
 4 -4 2 71.89 9.9
 -5 4 -2 68.89 9.2
 -5 4 -2 64.79 15.9
 -5 4 -2 68.59 12.5
 -5 4 -2 69.19 11.6
 5 -4 2 70.79 12.8
 5 -4 2 72.89 16.2
 5 -4 2 44.6 14.5
 5 -4 2 65.99 10.2
 5 -4 2 70.69 9.4
 5 -4 2 64.79 11
 -6 4 -2 185.48 21.6
 -6 4 -2 222.98 26.8
 -6 4 -2 189.28 21.3
 -6 4 -2 153.98 21.5
 6 -4 2 206.58 21.3
 6 -4 2 250.67 30.9
 6 -4 2 176.98 17.5
 6 -4 2 250.77 23
 6 -4 2 228.98 28.1
 6 -4 2 203.68 20.9
 6 -4 2 190.68 18.1
 6 -4 2 149.49 19.5
 -7 4 -2 127.79 17.6
 -7 4 -2 168.78 26.4
 -7 4 -2 112.39 19.9
 -7 4 -2 175.68 20.8
 7 -4 2 145.39 24.9
 7 -4 2 128.59 15.9
 7 -4 2 150.08 18.8
 7 -4 2 134.59 16.5
 7 -4 2 136.69 18.7
 7 -4 2 143.19 19.7
 7 -4 2 145.09 19.7
 7 -4 2 155.58 20
 7 -4 2 135.89 17.5
 7 -4 2 117.49 16.2
 -8 4 -2 82.09 19.2
 -8 4 -2 154.88 26.9
 -8 4 -2 86.79 22.1
 -8 4 -2 91.29 16.8
 8 -4 2 124.39 17.6
 8 -4 2 97.49 16.8
 8 -4 2 116.99 14.2
 8 -4 2 105.39 21.2
 8 -4 2 90.89 20.8
 8 -4 2 104.99 17.3
 8 -4 2 91.89 19.6
 8 -4 2 96.79 15.1
 8 -4 2 80.39 25.6
 -9 4 -2 122.79 20.5
 -9 4 -2 150.48 31
 -9 4 -2 144.29 24.7
 9 -4 2 158.98 27.1
 9 -4 2 144.79 30.7
 9 -4 2 140.39 26.7
 9 -4 2 157.68 21.8
 9 -4 2 133.49 20.5
 9 -4 2 135.29 17
 9 -4 2 141.59 20.7
 9 -4 2 144.09 20.3
 -10 4 -2 61.39 25.2
 -10 4 -2 61.69 32.3
 -10 4 -2 57.19 18.5
 -10 4 -2 76.59 21.7
 10 -4 2 43.4 32.6
 10 -4 2 55.79 22.4
 10 -4 2 90.99 20.8
 10 -4 2 89.09 29.2
 10 -4 2 67.89 20.3
 10 -4 2 45.4 20.9
 -11 4 -2 25.6 26.6
 -11 4 -2 -29.6 35.1
 11 -4 2 -27.1 16.4
 11 -4 2 18.6 21.4
 11 -4 2 -19.8 36.7
 11 -4 2 -17.4 24.8
 -12 4 -2 34.5 33.5
 -12 4 -2 29.8 44.2
 12 -4 2 -56.89 29.9
 12 -4 2 -6.9 38.8
 12 -4 2 7.7 27
 -13 4 -2 43.7 41.2
 13 -4 2 46.2 32.3
 13 -4 2 50.99 38.6
 13 -4 2 30.2 50.19
 -14 4 -2 81.89 51.39
 14 -4 2 -23.6 58.49
 16 3 -2 10.9 51.69
 16 3 -2 -1 62.69
 16 3 -2 57.39 59.39
 16 3 -2 32.5 52.59
 -16 -3 2 57.69 51.39
 -16 -3 2 18.6 55.09
 -16 -3 2 -2.5 40.6
 15 3 -2 50.99 42.3
 15 3 -2 -74.39 42.8
 15 3 -2 -97.09 41.2
 15 3 -2 54.19 46.8
 -15 -3 2 1.5 29.5
 -15 -3 2 37.4 40
 -15 -3 2 63.69 45.2
 14 3 -2 63.89 37.3
 14 3 -2 -5.1 39.3
 14 3 -2 -15.3 36.2
 14 3 -2 6.7 35
 -14 -3 2 11.3 25.6
 -14 -3 2 27.6 33.8
 -14 -3 2 49.6 37.9
 13 3 -2 92.29 40.2
 13 3 -2 17.6 30.9
 13 3 -2 -2.9 29.9
 13 3 -2 10 42.5
 -13 -3 2 -17.4 20.6
 -13 -3 2 -2.7 31.1
 -13 -3 2 22 27.9
 12 3 -2 51.09 26.1
 12 3 -2 -4.3 24.6
 12 3 -2 39.1 47.5
 12 3 -2 10 31
 12 3 -2 13.1 26
 -12 -3 2 9 22.2
 -12 -3 2 11.1 17.7
 -12 -3 2 -10.5 26.1
 11 3 -2 65.09 21
 11 3 -2 100.89 26.4
 11 3 -2 65.69 25.8
 11 3 -2 96.39 24.9
 11 3 -2 99.69 37.5
 11 3 -2 64.49 29.2
 -11 -3 2 97.99 19.3
 -11 -3 2 91.09 26.2
 -11 -3 2 92.59 26.9
 -11 -3 2 71.19 22
 10 3 -2 90.49 23.8
 10 3 -2 103.89 21.1
 10 3 -2 137.39 23.3
 10 3 -2 141.29 33.2
 10 3 -2 109.59 24.7
 10 3 -2 176.98 24.9
 -10 -3 2 123.49 22.4
 -10 -3 2 88.49 27.6
 -10 -3 2 172.68 21.9
 -10 -3 2 153.08 26.7
 -10 -3 2 164.38 23.2
 -10 -3 2 120.69 21.9
 9 3 -2 6.6 13
 9 3 -2 18.4 23.5
 9 3 -2 -16.3 15.7
 9 3 -2 -3.8 13.8
 9 3 -2 1.5 16
 9 3 -2 -6 15.3
 9 3 -2 29.5 17.1
 9 3 -2 59.89 23.7
 9 3 -2 14.7 16.1
 -9 -3 2 -17.4 13.1
 -9 -3 2 3.7 17.1
 -9 -3 2 17.6 13.8
 -9 -3 2 20.4 19
 -9 -3 2 21.1 14.8
 -9 -3 2 23.2 12.9
 8 3 -2 15.3 13.7
 8 3 -2 7.4 10
 8 3 -2 -14.9 12.5
 8 3 -2 13.7 18.9
 8 3 -2 8.8 13.3
 8 3 -2 1.3 13.6
 8 3 -2 -11.6 12.1
 8 3 -2 6.3 13
 8 3 -2 8.7 13.9
 8 3 -2 32 13.3
 -8 -3 2 4.3 10.1
 -8 -3 2 13.6 10.9
 -8 -3 2 -36.2 15.8
 -8 -3 2 1.5 17.3
 -8 -3 2 -6.6 11.7
 -8 -3 2 7.4 14.8
 -8 -3 2 -0.6 15.7
 7 3 -2 357.76 31.1
 7 3 -2 278.77 27.3
 7 3 -2 279.77 25.5
 7 3 -2 278.17 26.9
 7 3 -2 309.37 27.8
 7 3 -2 264.27 30.4
 7 3 -2 288.17 28.1
 7 3 -2 260.57 26.2
 7 3 -2 266.97 24
 7 3 -2 303.97 29
 -7 -3 2 289.87 26.7
 -7 -3 2 266.77 23.6
 -7 -3 2 294.57 24.5
 -7 -3 2 305.37 29.7
 -7 -3 2 367.36 31.8
 -7 -3 2 265.17 30.2
 -7 -3 2 307.07 27.3
 -7 -3 2 319.87 31.7
 -7 -3 2 275.37 28.3
 6 3 -2 58.89 11
 6 3 -2 63.49 12.9
 6 3 -2 71.09 12.2
 6 3 -2 30 9.8
 6 3 -2 31.2 14.6
 6 3 -2 60.89 14.5
 6 3 -2 60.49 8.9
 6 3 -2 38.9 11.5
 6 3 -2 43.8 11.3
 6 3 -2 51.79 13
 -6 -3 2 73.89 16
 -6 -3 2 69.59 12.3
 -6 -3 2 61.09 8.9
 -6 -3 2 71.89 15.6
 -6 -3 2 37.1 12.6
 -6 -3 2 59.69 13.2
 -6 -3 2 59.39 10.8
 -6 -3 2 51.09 10.9
 -6 -3 2 51.29 13
 5 3 -2 -5.5 8.3
 5 3 -2 3.3 7.2
 5 3 -2 2.2 10.4
 5 3 -2 -12.3 7
 5 3 -2 4.5 8
 5 3 -2 -7.9 7.5
 5 3 -2 -15.3 8.1
 5 3 -2 -4.1 7.5
 5 3 -2 11.9 7.4
 -5 -3 2 0.3 8
 -5 -3 2 7.4 9.6
 -5 -3 2 5.2 5.9
 -5 -3 2 1.4 6.8
 -5 -3 2 14.6 9.1
 -5 -3 2 4.3 4.4
 -5 -3 2 -5.9 8.8
 -5 -3 2 -1.6 6.1
 4 3 -2 2.1 5.8
 4 3 -2 9.2 6.3
 4 3 -2 -4.1 6
 4 3 -2 5.8 8.8
 4 3 -2 7.3 6.1
 4 3 -2 -2.8 5.7
 4 3 -2 2.4 5.8
 4 3 -2 6.5 6.7
 4 3 -2 -7.3 6.5
 -4 -3 2 0.8 3
 -4 -3 2 -2.6 5.6
 -4 -3 2 7.1 6.7
 -4 -3 2 -16.3 7
 -4 -3 2 8.7 5.3
 -4 -3 2 7.7 6.3
 -4 -3 2 -1.5 7.2
 -4 -3 2 10.7 8.3
 -4 -3 2 -6.3 4.2
 -4 -3 2 5.3 5.3
 3 3 -2 32.7 6.9
 3 3 -2 47.1 7.5
 3 3 -2 44.5 9.7
 3 3 -2 38.5 8.2
 3 3 -2 53.19 8
 3 3 -2 41 6.9
 3 3 -2 42.2 7.4
 3 3 -2 39.7 7.3
 -3 -3 2 44.3 9
 -3 -3 2 39.3 7
 -3 -3 2 32.4 9.3
 -3 -3 2 38.7 6.4
 -3 -3 2 44.1 8.2
 -3 -3 2 39.9 6.8
 -3 -3 2 38.6 8.9
 -3 -3 2 29 6.4
 -3 -3 2 30.6 7
 -3 -3 2 44.8 7
 2 3 -2 378.66 26.4
 2 3 -2 379.56 26.5
 2 3 -2 403.26 26.2
 2 3 -2 401.56 26.5
 2 3 -2 356.46 26
 2 3 -2 336.97 26.9
 2 3 -2 404.36 27.9
 -2 -3 2 334.57 28.4
 -2 -3 2 412.36 27.5
 -2 -3 2 415.56 26.8
 -2 -3 2 337.87 26
 -2 -3 2 363.26 26.2
 -2 -3 2 365.26 26.4
 -2 -3 2 362.86 25.8
 -2 -3 2 406.96 26.4
 -2 -3 2 373.66 26.7
 -2 -3 2 397.96 26.3
 1 3 -2 1810.62 109.69
 1 3 -2 1737.93 108.59
 1 3 -2 1791.82 108.79
 1 3 -2 1539.75 109.19
 1 3 -2 1850.11 108.99
 1 3 -2 1805.52 108.29
 1 3 -2 1645.44 108.29
 1 3 -2 1638.24 108.39
 1 3 -2 1635.54 109.39
 1 3 -2 1572.14 109.09
 -1 -3 2 1778.42 108.79
 -1 -3 2 1617.94 109.09
 -1 -3 2 1803.82 108.79
 -1 -3 2 1634.04 108.59
 -1 -3 2 1664.83 108.59
 -1 -3 2 1535.75 109.19
 -1 -3 2 1708.43 108.29
 -1 -3 2 1736.33 109.59
 -1 -3 2 1717.83 109.09
 -1 -3 2 1797.12 109.49
 -1 -3 2 1870.51 108.89
 0 3 -2 2384.16 153.28
 0 3 -2 2495.05 152.18
 0 3 -2 2450.05 151.88
 0 3 -2 2159.68 152.08
 0 3 -2 2329.17 152.58
 0 3 -2 2469.65 152.98
 0 -3 2 2092.39 152.08
 0 -3 2 2598.04 153.28
 0 -3 2 2479.35 152.28
 0 -3 2 2477.05 153.38
 0 -3 2 2206.48 151.78
 0 -3 2 2462.55 151.58
 0 -3 2 2587.84 151.88
 0 -3 2 2427.16 152.58
 0 -3 2 2467.85 151.38
 -1 3 -2 530.85 33.4
 -1 3 -2 489.65 35.3
 -1 3 -2 493.25 35.3
 1 -3 2 513.75 34.4
 1 -3 2 505.55 36.5
 1 -3 2 520.85 33.2
 1 -3 2 518.45 33.6
 1 -3 2 540.65 35.5
 -2 3 -2 177.88 13.4
 -2 3 -2 210.88 15.9
 -2 3 -2 155.38 14.7
 2 -3 2 168.58 15.4
 2 -3 2 167.98 16
 2 -3 2 153.68 13
 2 -3 2 158.08 13.7
 2 -3 2 149.88 15.7
 -3 3 -2 27.1 6.8
 -3 3 -2 18.6 7.8
 -3 3 -2 25 4.3
 -3 3 -2 22.3 5.5
 -3 3 -2 22.6 4.1
 3 -3 2 23.9 7.8
 3 -3 2 35.8 6.1
 3 -3 2 10.8 7.9
 3 -3 2 18.4 5.2
 3 -3 2 26.9 8.7
 -4 3 -2 14.3 9.5
 -4 3 -2 2.2 7
 -4 3 -2 -7.7 9.9
 -4 3 -2 0.9 6
 -4 3 -2 3.8 4.8
 -4 3 -2 0.7 5.9
 4 -3 2 6.9 5.1
 4 -3 2 3.9 5.1
 4 -3 2 -3.3 5
 4 -3 2 -0.6 2.9
 4 -3 2 10.3 9.9
 4 -3 2 -9.3 7.8
 4 -3 2 -1.5 4.5
 4 -3 2 6.9 8.9
 4 -3 2 -3.6 6.5
 -5 3 -2 95.39 12.2
 -5 3 -2 86.09 15.5
 -5 3 -2 72.49 11.1
 -5 3 -2 77.99 15.3
 5 -3 2 74.49 9.8
 5 -3 2 68.29 8
 5 -3 2 74.19 11.2
 5 -3 2 110.29 18.1
 5 -3 2 66.49 12.5
 5 -3 2 81.09 9.7
 5 -3 2 77.19 9.1
 5 -3 2 77.39 11.8
 5 -3 2 84.49 10.4
 5 -3 2 58.89 13.6
 -6 3 -2 11.4 10.8
 -6 3 -2 2.5 9.7
 -6 3 -2 -2.4 12.1
 -6 3 -2 -3.4 7.9
 -6 3 -2 16.7 14.8
 -6 3 -2 2.6 9.3
 6 -3 2 -3.5 7.4
 6 -3 2 9.1 11
 6 -3 2 -3.5 9.2
 6 -3 2 4.8 13.1
 6 -3 2 1.8 14
 6 -3 2 15.1 7
 6 -3 2 -11.3 11.3
 6 -3 2 -11 8.1
 -7 3 -2 11.1 13.8
 -7 3 -2 -8.7 14
 -7 3 -2 -4.7 17.6
 -7 3 -2 -11 10.5
 -7 3 -2 -9.3 10.3
 7 -3 2 -11.8 10.1
 7 -3 2 -0.7 9.8
 7 -3 2 -10.8 16.9
 7 -3 2 -4.3 12.2
 7 -3 2 -18.9 10.7
 7 -3 2 1.7 7.9
 7 -3 2 -10.2 16.2
 7 -3 2 4.6 13.1
 7 -3 2 8.5 8.3
 7 -3 2 17.6 14.5
 -8 3 -2 -3.7 17.2
 -8 3 -2 26.3 18.2
 -8 3 -2 -44.4 21.7
 -8 3 -2 -1.5 11.9
 -8 3 -2 3.1 13.1
 -8 3 -2 1.9 12.7
 8 -3 2 21.8 9.5
 8 -3 2 -15 17.2
 8 -3 2 11.4 21
 8 -3 2 -0.9 14.9
 8 -3 2 30.4 14.5
 8 -3 2 -25.3 11.4
 8 -3 2 -7 10.7
 8 -3 2 26 13.6
 -9 3 -2 45.7 17.1
 -9 3 -2 22 22.7
 -9 3 -2 5 14.1
 -9 3 -2 26.9 18.2
 9 -3 2 43.6 17.4
 9 -3 2 52.19 23.2
 9 -3 2 45.7 16.1
 9 -3 2 51.59 15.4
 9 -3 2 14.9 22
 9 -3 2 49.7 12.4
 9 -3 2 73.79 26.2
 -10 3 -2 15.3 15.6
 -10 3 -2 -12.4 26.6
 -10 3 -2 7.7 18.9
 -10 3 -2 40.8 21.6
 10 -3 2 6.8 17
 10 -3 2 34.1 29.1
 10 -3 2 55.19 28.3
 10 -3 2 -15.8 20.1
 10 -3 2 45 15
 10 -3 2 39.2 19.1
 -11 3 -2 -24.6 24.3
 -11 3 -2 12.4 32.2
 -11 3 -2 23.7 23.3
 11 -3 2 28.5 20.6
 11 -3 2 7.7 29.8
 11 -3 2 6.7 24.8
 11 -3 2 -22.1 32.9
 11 -3 2 18.4 18.1
 -12 3 -2 53.39 32.4
 -12 3 -2 39.5 41.2
 12 -3 2 -7.2 19.8
 12 -3 2 33.1 31
 12 -3 2 24.2 43.9
 12 -3 2 8.8 25
 -13 3 -2 9.2 38
 13 -3 2 11.4 37.8
 13 -3 2 48.7 45.2
 13 -3 2 -12.1 30.9
 -14 3 -2 35.1 47.5
 14 -3 2 104.69 51.79
 14 -3 2 95.79 48.7
 -15 3 -2 -20 55.49
 15 -3 2 87.49 49.99
 15 -3 2 -21.2 56.69
 15 -3 2 53.99 72.29
 16 2 -2 15.5 60.39
 16 2 -2 18 61.79
 16 2 -2 -41.8 52.79
 16 2 -2 73.69 54.79
 -16 -2 2 -7.3 49
 15 2 -2 41.7 47.3
 15 2 -2 -6.8 52.49
 15 2 -2 -33.7 51.19
 15 2 -2 51.69 51.09
 -15 -2 2 -63.39 29
 -15 -2 2 9.8 39.9
 -15 -2 2 59.59 44
 14 2 -2 -64.29 35.7
 14 2 -2 -13.9 38.5
 14 2 -2 -24.9 43.3
 14 2 -2 -10.4 35.8
 -14 -2 2 -14 34.2
 -14 -2 2 55.59 39.7
 -14 -2 2 31.1 25.1
 13 2 -2 -21 29.9
 13 2 -2 13.7 31
 13 2 -2 -1.7 30
 13 2 -2 37.9 55.89
 13 2 -2 -7.1 31.9
 -13 -2 2 -5.7 29
 -13 -2 2 7 20.6
 -13 -2 2 -26.3 31.6
 12 2 -2 36.3 25.8
 12 2 -2 37 28.4
 12 2 -2 -26.6 23.6
 12 2 -2 61.89 46
 12 2 -2 2.2 27.4
 -12 -2 2 6.8 17.6
 -12 -2 2 6.8 22.8
 -12 -2 2 22.4 26.6
 -12 -2 2 37.5 28.6
 11 2 -2 -2.3 23.7
 11 2 -2 -19.6 24.5
 11 2 -2 78.69 38.9
 11 2 -2 -24 20.1
 11 2 -2 15.2 21.5
 11 2 -2 -18.5 21.1
 -11 -2 2 6.7 19
 -11 -2 2 37.4 23.1
 -11 -2 2 29.9 15.7
 -11 -2 2 2.3 22.8
 10 2 -2 158.28 26.3
 10 2 -2 138.69 24.3
 10 2 -2 143.49 24.9
 10 2 -2 82.29 24.1
 10 2 -2 162.68 24.3
 10 2 -2 87.09 33.7
 -10 -2 2 163.78 21.9
 -10 -2 2 163.88 24.8
 -10 -2 2 174.18 25.7
 -10 -2 2 100.19 26.7
 -10 -2 2 105.59 22.8
 -10 -2 2 121.19 26.8
 9 2 -2 29.9 17
 9 2 -2 48.8 17.5
 9 2 -2 60.89 17.5
 9 2 -2 61.19 25.9
 9 2 -2 81.09 16.8
 9 2 -2 68.49 17.5
 9 2 -2 66.29 19.1
 9 2 -2 43.1 16.7
 -9 -2 2 106.29 19.8
 -9 -2 2 53.59 20.4
 -9 -2 2 102.49 22.4
 -9 -2 2 29.8 14.4
 -9 -2 2 76.49 17.4
 8 2 -2 7.6 13.1
 8 2 -2 -2.7 12
 8 2 -2 -11.9 14.1
 8 2 -2 7.4 14.4
 8 2 -2 -3 11.9
 8 2 -2 8.7 13.9
 8 2 -2 -4.8 11.3
 8 2 -2 42.7 20.6
 8 2 -2 3.2 12.6
 8 2 -2 23.3 14.9
 -8 -2 2 -13.1 15.4
 -8 -2 2 2 11.7
 -8 -2 2 -11 18.2
 -8 -2 2 17.6 11.3
 -8 -2 2 0.9 15.8
 -8 -2 2 33.4 16
 -8 -2 2 -9.8 10.1
 -8 -2 2 6.6 11.4
 7 2 -2 278.57 30.1
 7 2 -2 262.07 26.5
 7 2 -2 269.07 25.5
 7 2 -2 288.17 32.2
 7 2 -2 302.27 27.8
 7 2 -2 268.47 25.2
 7 2 -2 247.08 27.4
 7 2 -2 329.37 28.2
 7 2 -2 264.77 24.1
 7 2 -2 285.07 27.9
 -7 -2 2 289.17 26
 -7 -2 2 257.07 28.9
 -7 -2 2 294.67 23.9
 -7 -2 2 286.47 31.9
 -7 -2 2 278.17 23.9
 -7 -2 2 291.17 29
 -7 -2 2 277.57 26.1
 -7 -2 2 285.77 27.9
 6 2 -2 43.4 11.1
 6 2 -2 35 10.8
 6 2 -2 21.5 8.6
 6 2 -2 32.2 14.6
 6 2 -2 42.5 9.5
 6 2 -2 27.9 10.2
 6 2 -2 40.4 11.7
 6 2 -2 49.8 14.1
 6 2 -2 44.9 10.6
 6 2 -2 39 11.7
 -6 -2 2 35.2 10.3
 -6 -2 2 41.8 13.1
 -6 -2 2 45.3 9.8
 -6 -2 2 11.2 12.1
 -6 -2 2 39.7 10
 -6 -2 2 57.79 22.3
 -6 -2 2 33.9 8.4
 -6 -2 2 40.6 12.3
 5 2 -2 1122.99 76.29
 5 2 -2 1219.38 75.99
 5 2 -2 1171.18 75.89
 5 2 -2 1158.98 75.19
 5 2 -2 1144.39 74.69
 5 2 -2 1097.59 74.19
 5 2 -2 1143.19 73.09
 5 2 -2 1107.79 75.19
 5 2 -2 1122.49 76.89
 5 2 -2 1100.59 74.19
 -5 -2 2 1120.69 76.19
 -5 -2 2 1112.79 74.19
 -5 -2 2 1166.68 75.09
 -5 -2 2 1063.19 74.89
 -5 -2 2 1126.29 74.29
 -5 -2 2 1165.28 75.39
 -5 -2 2 1114.39 76.09
 -5 -2 2 1072.99 75.69
 -5 -2 2 1083.39 73.09
 4 2 -2 16 7
 4 2 -2 10.1 8.5
 4 2 -2 2.3 6.9
 4 2 -2 14.9 6
 4 2 -2 1 6.2
 4 2 -2 -3.1 5.8
 4 2 -2 7 5.6
 4 2 -2 7.8 5.6
 4 2 -2 5.4 6.1
 -4 -2 2 3.5 7.9
 -4 -2 2 14.5 4.3
 -4 -2 2 2.9 5.2
 -4 -2 2 11.2 5.2
 -4 -2 2 15.4 8.3
 -4 -2 2 4.1 5.6
 -4 -2 2 9.2 7.4
 -4 -2 2 4.5 7.3
 -4 -2 2 2.1 8
 3 2 -2 0.7 6.2
 3 2 -2 6.9 6
 3 2 -2 -0.2 5.4
 3 2 -2 0.4 5.1
 3 2 -2 4.7 4.8
 3 2 -2 3.1 5.4
 3 2 -2 7.1 8.1
 3 2 -2 0.4 5.6
 -3 -2 2 7.4 4.8
 -3 -2 2 1.9 4.3
 -3 -2 2 4.4 4.5
 -3 -2 2 -4.8 5.9
 -3 -2 2 2.2 5.4
 -3 -2 2 0.1 6.2
 -3 -2 2 -3.1 6.2
 -3 -2 2 -3.7 2.5
 -3 -2 2 -2.1 4.3
 -3 -2 2 -1.2 5.7
 2 2 -2 3602.74 217.68
 2 2 -2 3421.96 218.58
 2 2 -2 3594.94 218.58
 2 2 -2 3377.06 217.98
 2 2 -2 3613.04 217.98
 2 2 -2 3250.77 217.38
 2 2 -2 3388.96 218.68
 2 2 -2 3461.95 217.88
 2 2 -2 3129.59 217.58
 2 2 -2 3650.73 217.88
 -2 -2 2 3276.97 217.68
 -2 -2 2 3715.23 218.08
 -2 -2 2 3686.83 218.78
 -2 -2 2 3221.38 217.58
 -2 -2 2 3220.38 217.48
 -2 -2 2 3196.98 217.78
 -2 -2 2 3770.22 218.08
 1 2 -2 139.79 10.2
 1 2 -2 119.19 10.1
 1 2 -2 96.99 10.9
 1 2 -2 108.79 10.5
 1 2 -2 140.99 9.9
 1 2 -2 99.99 11
 1 2 -2 131.59 9.5
 1 2 -2 108.89 9.5
 1 2 -2 114.69 10.6
 -1 -2 2 127.89 10.1
 -1 -2 2 128.59 9.4
 -1 -2 2 128.69 9.8
 -1 -2 2 103.49 10.9
 -1 -2 2 111.29 10.6
 -1 -2 2 105.09 9.8
 -1 -2 2 122.39 11
 -1 -2 2 113.09 10.3
 0 2 -2 1160.28 68.69
 0 2 -2 1066.39 69.19
 0 2 -2 1228.88 71.09
 0 2 -2 1184.08 68.19
 0 2 -2 1101.09 67.69
 0 2 -2 928.31 68.59
 0 -2 2 1111.09 68.79
 0 -2 2 1060.79 69.19
 0 -2 2 1091.99 68.09
 0 -2 2 1074.99 68.19
 0 -2 2 1113.09 68.79
 0 -2 2 1113.89 69.39
 0 -2 2 1013 67.89
 0 -2 2 888.01 68.39
 0 -2 2 965.5 68.69
 -1 2 -2 299.47 21.9
 -1 2 -2 258.97 20.4
 -1 2 -2 324.27 22.2
 1 -2 2 307.27 21.7
 1 -2 2 305.87 22.1
 1 -2 2 297.07 19.9
 1 -2 2 307.87 22.1
 1 -2 2 315.77 21.3
 1 -2 2 307.17 21.1
 1 -2 2 328.27 20.8
 -2 2 -2 511.55 35.8
 -2 2 -2 521.75 34.6
 -2 2 -2 521.55 33.5
 -2 2 -2 510.75 35.4
 2 -2 2 552.24 36
 2 -2 2 541.55 35.7
 2 -2 2 481.15 34.9
 2 -2 2 502.65 34.8
 -3 2 -2 -2.8 5.2
 -3 2 -2 0.4 4.2
 -3 2 -2 0 5.5
 -3 2 -2 4.1 3.8
 -3 2 -2 2.5 6.7
 3 -2 2 -4.5 6.4
 3 -2 2 5.2 7.1
 3 -2 2 0.4 4.2
 3 -2 2 2.7 4.4
 3 -2 2 -2.2 2.6
 3 -2 2 2.4 4.3
 3 -2 2 4.2 6.1
 3 -2 2 0.3 2.8
 -4 2 -2 1965.4 117.99
 -4 2 -2 1712.73 114.89
 -4 2 -2 1783.12 115.09
 -4 2 -2 1881.51 113.79
 -4 2 -2 1904.61 116.29
 4 -2 2 1693.63 113.69
 4 -2 2 1775.72 114.69
 4 -2 2 1773.72 116.29
 4 -2 2 1762.32 115.99
 4 -2 2 1697.63 113.89
 4 -2 2 1765.32 116.19
 4 -2 2 1765.52 113.39
 4 -2 2 1746.43 113.29
 -5 2 -2 89.59 11.3
 -5 2 -2 83.49 12.3
 -5 2 -2 91.19 14.4
 -5 2 -2 106.59 15.4
 5 -2 2 76.69 13.8
 5 -2 2 82.69 13
 5 -2 2 61.29 10.1
 5 -2 2 73.19 9.6
 5 -2 2 106.09 13.1
 5 -2 2 72.99 8.5
 5 -2 2 87.79 11.6
 5 -2 2 80.49 9.2
 5 -2 2 73.59 12.8
 -6 2 -2 535.25 37.7
 -6 2 -2 471.65 39.5
 -6 2 -2 526.45 36.5
 -6 2 -2 484.55 35.9
 -6 2 -2 549.85 40.9
 -6 2 -2 462.75 35.4
 6 -2 2 451.05 35.4
 6 -2 2 471.95 34.6
 6 -2 2 498.45 39.2
 6 -2 2 469.65 36.1
 6 -2 2 519.25 41.2
 6 -2 2 468.55 33.4
 6 -2 2 508.25 36.6
 -7 2 -2 2 13.5
 -7 2 -2 -2.4 10.6
 -7 2 -2 -3.6 10
 -7 2 -2 19.2 9.8
 -7 2 -2 -19.4 12.2
 -7 2 -2 -1.7 15.7
 7 -2 2 -0.9 9.7
 7 -2 2 5.4 7.7
 7 -2 2 13.8 13.8
 7 -2 2 -1.1 14.2
 7 -2 2 1.6 11.9
 7 -2 2 5.8 10.5
 7 -2 2 9.4 15
 7 -2 2 -3.5 11.3
 7 -2 2 13.2 8.7
 -8 2 -2 1.5 16.5
 -8 2 -2 19.5 12.9
 -8 2 -2 2.7 12.6
 -8 2 -2 4.4 16.7
 -8 2 -2 14.7 20.2
 -8 2 -2 7.2 18.3
 8 -2 2 2.2 13.1
 8 -2 2 21 11.8
 8 -2 2 -10 18.7
 8 -2 2 -0.6 13.3
 8 -2 2 21.3 10.7
 8 -2 2 7.9 9.3
 8 -2 2 5.4 17.4
 8 -2 2 4.1 13
 -9 2 -2 25.6 16
 -9 2 -2 19.8 20
 -9 2 -2 21.1 16.3
 -9 2 -2 5.5 25.2
 9 -2 2 -7.6 13.6
 9 -2 2 0.4 19.4
 9 -2 2 46.5 21.7
 9 -2 2 34 16.5
 9 -2 2 27.1 19.3
 9 -2 2 0.8 13.8
 -10 2 -2 71.69 22.3
 -10 2 -2 91.89 18.6
 -10 2 -2 59.49 27.2
 -10 2 -2 99.49 22.3
 10 -2 2 110.79 20.5
 10 -2 2 94.49 17.3
 10 -2 2 87.09 20.2
 10 -2 2 72.59 43.7
 10 -2 2 114.39 24.1
 10 -2 2 85.79 27.2
 -11 2 -2 -2 21.6
 -11 2 -2 15.1 29.1
 -11 2 -2 -12.2 22.8
 11 -2 2 -42.2 27.4
 11 -2 2 1.1 20.5
 11 -2 2 -18.2 55.99
 11 -2 2 -23.1 16
 11 -2 2 -9.8 24.1
 -12 2 -2 15.5 25.3
 -12 2 -2 10.8 29.6
 12 -2 2 1.6 29.3
 12 -2 2 -9.9 24
 12 -2 2 -5.6 19.4
 -13 2 -2 54.99 37
 13 -2 2 24.1 31.3
 13 -2 2 30.2 39.4
 13 -2 2 -14.5 46.3
 13 -2 2 73.09 24.2
 -14 2 -2 43.4 43.6
 14 -2 2 -93.59 43.1
 14 -2 2 -85.09 44.9
 -15 2 -2 38.8 53.09
 15 -2 2 80.89 58.09
 15 -2 2 7.5 61.09
 15 -2 2 18.8 46.6
 16 1 -2 -21.9 52.49
 16 1 -2 12.5 72.49
 16 1 -2 47.1 62.19
 16 1 -2 37.4 56.09
 -16 -1 2 -11.6 51.19
 15 1 -2 29.2 47.7
 15 1 -2 -7.6 45.4
 15 1 -2 -4.2 53.49
 -15 -1 2 62.59 42.7
 -15 -1 2 -28 72.49
 14 1 -2 14.4 38.4
 14 1 -2 73.59 41.9
 14 1 -2 -8.3 37
 14 1 -2 38.3 37.6
 -14 -1 2 16.7 24.8
 -14 -1 2 32.6 39.1
 -14 -1 2 69.49 35.8
 13 1 -2 62.39 32.3
 13 1 -2 26.7 32.3
 13 1 -2 20 31
 13 1 -2 4.8 31.9
 -13 -1 2 79.39 39.5
 -13 -1 2 36.1 30.2
 -13 -1 2 22.1 20.6
 -13 -1 2 -1.4 35.2
 12 1 -2 13.4 25.4
 12 1 -2 -6.4 45.2
 12 1 -2 18.9 27.2
 12 1 -2 48.6 26.3
 12 1 -2 12.3 30.1
 -12 -1 2 23.7 30
 -12 -1 2 -2.5 17.3
 -12 -1 2 21.1 27.5
 -12 -1 2 6.3 23.1
 -12 -1 2 47.6 36.2
 11 1 -2 169.28 28.2
 11 1 -2 155.58 41.3
 11 1 -2 118.79 28.4
 11 1 -2 133.09 33.2
 11 1 -2 129.79 27.9
 -11 -1 2 149.79 30.6
 -11 -1 2 131.39 20.4
 -11 -1 2 124.69 25.9
 -11 -1 2 104.59 30
 -11 -1 2 131.99 29.3
 10 1 -2 76.29 22.8
 10 1 -2 48.7 21.1
 10 1 -2 113.19 22.3
 10 1 -2 105.19 22.1
 10 1 -2 46.5 23.3
 10 1 -2 124.79 33.4
 -10 -1 2 81.29 15.4
 -10 -1 2 46.6 22.6
 -10 -1 2 79.29 21
 -10 -1 2 54.79 24.4
 -10 -1 2 59.09 21.9
 9 1 -2 16.8 15
 9 1 -2 -26.8 16.7
 9 1 -2 19.1 24.7
 9 1 -2 -13.2 14.4
 9 1 -2 -7.5 14.6
 9 1 -2 18.4 14.4
 9 1 -2 33.6 15
 9 1 -2 24.4 16.3
 -9 -1 2 -18.9 14.5
 -9 -1 2 -6 12.7
 -9 -1 2 6 19
 -9 -1 2 -0.1 14.7
 -9 -1 2 58.09 19.6
 -9 -1 2 12.6 10.7
 8 1 -2 42.4 14
 8 1 -2 77.19 15.2
 8 1 -2 49.1 14.6
 8 1 -2 36.5 22.3
 8 1 -2 61.09 16.4
 8 1 -2 35.7 16.2
 8 1 -2 50.69 14.9
 8 1 -2 54.19 15.9
 8 1 -2 72.69 17
 8 1 -2 51.49 18.4
 -8 -1 2 62.29 18.2
 -8 -1 2 84.79 19.2
 -8 -1 2 80.49 16.1
 -8 -1 2 86.39 20.1
 -8 -1 2 63.79 21.9
 -8 -1 2 75.59 16.7
 -8 -1 2 82.09 16
 7 1 -2 -2.1 12.2
 7 1 -2 -3.7 12
 7 1 -2 15.5 11.6
 7 1 -2 3.8 9.9
 7 1 -2 12.2 11.8
 7 1 -2 -14.5 15.7
 7 1 -2 -1.1 12
 7 1 -2 4.9 10.1
 7 1 -2 -1.7 10
 7 1 -2 7.3 11.6
 -7 -1 2 13.3 10.1
 -7 -1 2 7.5 13.6
 -7 -1 2 4.9 10.2
 -7 -1 2 -3.3 9.6
 -7 -1 2 12.2 15.7
 -7 -1 2 -6.1 14.1
 -7 -1 2 -2.9 8.5
 -7 -1 2 16.7 12.6
 6 1 -2 144.99 17.1
 6 1 -2 150.48 19.1
 6 1 -2 161.48 19.9
 6 1 -2 157.48 17.2
 6 1 -2 175.28 22.5
 6 1 -2 173.78 20.1
 6 1 -2 148.79 19
 6 1 -2 135.59 19.6
 6 1 -2 159.88 20
 6 1 -2 167.98 17
 -6 -1 2 147.69 20.7
 -6 -1 2 141.69 19.3
 -6 -1 2 147.29 20.1
 -6 -1 2 130.89 16.1
 -6 -1 2 164.88 18.1
 -6 -1 2 161.48 15.4
 -6 -1 2 164.18 18.6
 -6 -1 2 177.28 21.9
 -6 -1 2 149.99 18
 5 1 -2 1705.53 105.79
 5 1 -2 1698.13 106.59
 5 1 -2 1643.24 106.79
 5 1 -2 1583.64 104.69
 5 1 -2 1602.74 104.69
 5 1 -2 1642.14 107.59
 5 1 -2 1580.74 106.89
 5 1 -2 1627.94 105.99
 5 1 -2 1630.24 104.99
 -5 -1 2 1663.33 107.09
 -5 -1 2 1603.14 105.89
 -5 -1 2 1497.15 106.29
 -5 -1 2 1646.44 105.09
 -5 -1 2 1669.63 105.89
 -5 -1 2 1679.63 107.19
 -5 -1 2 1556.34 104.59
 -5 -1 2 1524.45 104.59
 4 1 -2 56.89 8
 4 1 -2 59.79 10.6
 4 1 -2 64.09 9.5
 4 1 -2 44.5 8.2
 4 1 -2 69.09 14.9
 4 1 -2 63.29 10.4
 4 1 -2 50.79 9.9
 4 1 -2 62.49 8.8
 4 1 -2 60.69 9.7
 -4 -1 2 58.09 11
 -4 -1 2 67.69 8.9
 -4 -1 2 72.19 12
 -4 -1 2 56.99 9.9
 -4 -1 2 63.39 10.7
 -4 -1 2 40.6 7.8
 -4 -1 2 63.09 8.1
 -4 -1 2 56.09 9.9
 -4 -1 2 52.69 8
 3 1 -2 1322.67 85.89
 3 1 -2 1302.17 85.89
 3 1 -2 1439.06 86.89
 3 1 -2 1400.76 87.29
 3 1 -2 1095.69 86.49
 3 1 -2 1337.47 86.19
 3 1 -2 1376.36 85.29
 -3 -1 2 1339.57 84.69
 -3 -1 2 1301.67 85.09
 -3 -1 2 1320.57 85.29
 -3 -1 2 1380.46 85.99
 -3 -1 2 1238.68 84.09
 -3 -1 2 1447.26 87.19
 -3 -1 2 1350.36 86.29
 -3 -1 2 1237.18 87.09
 -3 -1 2 1214.78 86.49
 -3 -1 2 1427.06 85.79
 2 1 -2 1083.69 70.09
 2 1 -2 1170.78 70.99
 2 1 -2 1157.68 71.39
 2 1 -2 1015.7 70.49
 2 1 -2 993.5 70.69
 2 1 -2 1096.29 71.09
 2 1 -2 1157.78 71.29
 2 1 -2 1022 70.69
 -2 -1 2 1150.08 71.29
 -2 -1 2 1079.49 70.09
 -2 -1 2 1000.5 70.39
 -2 -1 2 1143.29 71.29
 -2 -1 2 1269.47 72.39
 -2 -1 2 1127.29 70.79
 -2 -1 2 1207.58 72.29
 -2 -1 2 941.61 70.59
 1 1 -2 -1.6 2.8
 1 1 -2 3.5 4.6
 1 1 -2 1.4 2.6
 1 1 -2 -3.6 2.6
 1 1 -2 3.8 2.8
 1 1 -2 0.8 4.3
 1 1 -2 0.5 3
 1 1 -2 -2.4 2.7
 -1 -1 2 2.9 3.2
 -1 -1 2 3.2 3.6
 -1 -1 2 2.7 3
 -1 -1 2 1.3 2.5
 -1 -1 2 0.6 2.8
 -1 -1 2 3.4 3.3
 -1 -1 2 -0.2 3.1
 -1 -1 2 4 4.3
 -1 -1 2 -1.1 4.4
 0 1 -2 645.64 42.8
 0 1 -2 750.62 42.8
 0 1 -2 550.44 42.8
 0 1 -2 670.43 42.8
 0 1 -2 665.83 42.2
 0 1 -2 704.73 42.2
 0 1 -2 558.64 42.8
 0 -1 2 653.33 42.3
 0 -1 2 565.64 42.9
 0 -1 2 692.73 42.9
 0 -1 2 632.94 43
 0 -1 2 711.13 42.7
 0 -1 2 710.63 42.3
 0 -1 2 665.33 42.9
 -1 1 -2 20 2.2
 -1 1 -2 17.9 4.5
 -1 1 -2 24.7 4.9
 -1 1 -2 19 4.4
 -1 1 -2 16.8 4
 1 -1 2 30.7 4.4
 1 -1 2 15.2 4
 1 -1 2 14.1 4.5
 1 -1 2 18.8 3.5
 1 -1 2 22 2.7
 1 -1 2 13 3.3
 -2 1 -2 227.48 17.9
 -2 1 -2 223.58 18.5
 -2 1 -2 234.68 17.8
 -2 1 -2 277.77 18
 2 -1 2 255.77 18.6
 2 -1 2 229.38 16.3
 2 -1 2 246.98 16.6
 2 -1 2 255.57 18
 2 -1 2 278.67 18.7
 2 -1 2 213.98 17.4
 2 -1 2 243.68 18.5
 2 -1 2 236.08 17.9
 2 -1 2 259.77 16.8
 -3 1 -2 685.43 46.4
 -3 1 -2 679.53 46.6
 -3 1 -2 640.34 47
 -3 1 -2 765.42 45.5
 -3 1 -2 713.93 46.8
 3 -1 2 679.03 45
 3 -1 2 728.13 46.3
 3 -1 2 718.03 45.5
 3 -1 2 669.13 46.7
 3 -1 2 685.13 47.1
 3 -1 2 727.33 46.9
 3 -1 2 695.33 45
 3 -1 2 662.23 45.8
 -4 1 -2 25.7 8.8
 -4 1 -2 21.4 7.9
 -4 1 -2 33.4 5.1
 -4 1 -2 30 7.2
 -4 1 -2 28.5 6.6
 -4 1 -2 30 4.7
 -4 1 -2 26.2 6.3
 4 -1 2 17.6 8.3
 4 -1 2 39.5 7.1
 4 -1 2 38.3 6
 4 -1 2 27.8 7.9
 4 -1 2 30.9 5
 4 -1 2 18 7.6
 4 -1 2 34.3 7.2
 4 -1 2 33 7.4
 4 -1 2 33.7 5.1
 -5 1 -2 672.33 48.1
 -5 1 -2 621.04 47.5
 -5 1 -2 657.43 45.4
 -5 1 -2 709.93 48.3
 -5 1 -2 704.53 44.1
 -5 1 -2 713.23 45.6
 -5 1 -2 701.53 43.7
 -5 1 -2 649.83 46.1
 5 -1 2 652.13 43.8
 5 -1 2 672.33 46.1
 5 -1 2 692.03 47.6
 5 -1 2 590.04 49.2
 5 -1 2 646.94 44.8
 5 -1 2 666.03 45.9
 -6 1 -2 222.08 21.6
 -6 1 -2 213.98 20.7
 -6 1 -2 213.58 22.7
 -6 1 -2 230.78 16.4
 -6 1 -2 233.78 20.8
 -6 1 -2 204.28 19.7
 -6 1 -2 226.28 25.2
 6 -1 2 185.98 21.1
 6 -1 2 225.38 25.6
 6 -1 2 202.48 20.2
 6 -1 2 200.38 21.5
 6 -1 2 191.98 17.1
 6 -1 2 176.88 21.8
 6 -1 2 213.88 18.5
 6 -1 2 203.08 20
 -7 1 -2 47.4 9.8
 -7 1 -2 16.1 15.8
 -7 1 -2 9.9 6.9
 -7 1 -2 33.6 13.7
 -7 1 -2 22.5 11.7
 -7 1 -2 20 12.5
 -7 1 -2 16.5 10.7
 -7 1 -2 23.6 10.6
 7 -1 2 26.3 15.4
 7 -1 2 16.3 9.3
 7 -1 2 26.9 10.4
 7 -1 2 17.2 8.3
 7 -1 2 22.7 11.3
 7 -1 2 25.5 13.2
 7 -1 2 7.3 13.3
 7 -1 2 31.7 11.6
 -8 1 -2 150.28 18.2
 -8 1 -2 133.69 21.1
 -8 1 -2 130.39 23.6
 -8 1 -2 135.39 19
 -8 1 -2 130.49 17.1
 -8 1 -2 123.29 21.8
 -8 1 -2 117.69 14.3
 -8 1 -2 161.38 21.5
 8 -1 2 145.99 15.6
 8 -1 2 146.29 19.8
 8 -1 2 134.49 16.4
 8 -1 2 112.29 20.8
 8 -1 2 148.29 21.3
 8 -1 2 124.19 19.8
 8 -1 2 94.49 17.6
 8 -1 2 100.59 24.2
 8 -1 2 122.19 21.9
 -9 1 -2 -5.7 15
 -9 1 -2 19 15.6
 -9 1 -2 34 18.7
 -9 1 -2 23.2 16.4
 -9 1 -2 13 9.3
 9 -1 2 15.9 18.3
 9 -1 2 26.2 14.5
 9 -1 2 15.9 11.6
 9 -1 2 8.9 13.3
 9 -1 2 57.19 16.9
 9 -1 2 29.1 21.2
 -10 1 -2 117.59 22
 -10 1 -2 89.59 12.7
 -10 1 -2 126.59 20.9
 -10 1 -2 109.99 22.3
 10 -1 2 33.2 18.7
 10 -1 2 60.79 29.5
 10 -1 2 113.79 18
 10 -1 2 84.19 20.6
 10 -1 2 99.99 23.2
 10 -1 2 50.69 24.1
 -11 1 -2 -16.8 20.6
 -11 1 -2 31.4 16.5
 -11 1 -2 -0.1 22.8
 11 -1 2 24.8 57.39
 11 -1 2 -40.1 22.9
 11 -1 2 28.7 20
 11 -1 2 25.3 17
 11 -1 2 48 29.3
 -12 1 -2 -6.4 27.3
 -12 1 -2 0.3 25.3
 12 -1 2 -13.6 28.2
 12 -1 2 45.4 29.9
 12 -1 2 -5.4 19.6
 12 -1 2 32.8 24.8
 -13 1 -2 23.3 33.2
 -13 1 -2 -8.9 32.8
 13 -1 2 -2.2 29.2
 13 -1 2 65.99 38.4
 13 -1 2 5.5 22
 13 -1 2 4.7 64.59
 -14 1 -2 47.3 40.6
 14 -1 2 -43.4 43.1
 14 -1 2 1.5 59.69
 -15 1 -2 1.2 49.9
 15 -1 2 -23.4 53.69
 15 -1 2 -11.9 56.19
 15 -1 2 57.79 45.8
 16 0 -2 -29.7 55.19
 16 0 -2 64.59 55.99
 16 0 -2 90.89 72.69
 16 0 -2 29.4 63.39
 -16 0 2 -6.8 55.09
 15 0 -2 96.49 51.29
 15 0 -2 83.19 56.19
 15 0 -2 128.89 54.09
 15 0 -2 99.89 48.6
 -15 0 2 12.8 44.5
 14 0 -2 31.2 39.5
 14 0 -2 49.1 38.4
 14 0 -2 -11.4 38.6
 14 0 -2 -20 36.9
 -14 0 2 41.5 38.8
 -14 0 2 -39.2 38.7
 -14 0 2 21.7 54.29
 13 0 -2 38.4 34.5
 13 0 -2 58.89 37.4
 13 0 -2 111.99 33.4
 13 0 -2 77.29 34.6
 -13 0 2 148.59 39.1
 -13 0 2 64.69 21.4
 -13 0 2 101.99 36.2
 -13 0 2 94.39 41.5
 12 0 -2 7.5 26
 12 0 -2 -48 25.9
 12 0 -2 -22.9 27
 12 0 -2 25.5 48
 -12 0 2 -29.9 31.5
 -12 0 2 8.4 27.9
 -12 0 2 -25.7 17.3
 -12 0 2 24.3 30.8
 -12 0 2 15.7 24
 11 0 -2 54.39 23.6
 11 0 -2 25.2 25.7
 11 0 -2 102.19 40.4
 11 0 -2 43.6 24.7
 11 0 -2 64.79 24
 -11 0 2 43 25.9
 -11 0 2 44.4 16.1
 -11 0 2 56.89 28
 -11 0 2 14.9 26
 -11 0 2 74.99 23.3
 10 0 -2 22.4 19.8
 10 0 -2 35.5 21.9
 10 0 -2 15.1 20.1
 10 0 -2 -51.99 34
 10 0 -2 47.7 33.5
 10 0 -2 35.4 19.8
 -10 0 2 22.2 21.9
 -10 0 2 1.3 23
 -10 0 2 53.99 18.8
 -10 0 2 29.7 13
 -10 0 2 16.1 23
 9 0 -2 317.17 44.4
 9 0 -2 254.57 30.9
 9 0 -2 266.77 31.5
 9 0 -2 232.08 31.4
 9 0 -2 299.97 31.7
 9 0 -2 274.97 32.2
 9 0 -2 288.47 31.3
 9 0 -2 227.08 32.6
 -9 0 2 283.87 31.3
 -9 0 2 261.97 34
 -9 0 2 291.47 35.1
 -9 0 2 295.37 33.1
 -9 0 2 257.57 24.6
 8 0 -2 34 14.7
 8 0 -2 -6.8 16.4
 8 0 -2 4.9 13.2
 8 0 -2 7.6 17.4
 8 0 -2 28.5 13.7
 8 0 -2 -4.5 21
 8 0 -2 -6.1 12
 8 0 -2 4.6 12.7
 8 0 -2 -7.5 12.6
 8 0 -2 -10.1 13.5
 -8 0 2 14.7 12.8
 -8 0 2 6.1 13
 -8 0 2 14.4 20.1
 -8 0 2 -5.8 13.1
 -8 0 2 29.5 18.6
 -8 0 2 0.6 15.2
 -8 0 2 17.6 17
 7 0 -2 36.5 13.2
 7 0 -2 57.29 19.7
 7 0 -2 39.2 11.4
 7 0 -2 59.79 14.5
 7 0 -2 61.19 14
 7 0 -2 47.4 16.2
 7 0 -2 30.1 11.9
 7 0 -2 57.09 14.1
 7 0 -2 34.6 14.2
 7 0 -2 30.6 10.8
 -7 0 2 59.19 15.7
 -7 0 2 26.6 11.7
 -7 0 2 17.1 14.8
 -7 0 2 51.09 10.8
 -7 0 2 29.1 12.7
 -7 0 2 23.1 10.9
 -7 0 2 28.7 16.7
 -7 0 2 46.4 14.7
 6 0 -2 247.58 23.4
 6 0 -2 221.18 23.4
 6 0 -2 278.47 21.9
 6 0 -2 253.37 27.7
 6 0 -2 232.38 23.4
 6 0 -2 262.67 23.7
 6 0 -2 248.58 22.1
 6 0 -2 232.98 24
 6 0 -2 260.07 28.6
 6 0 -2 223.28 21.4
 -6 0 2 220.28 26.2
 -6 0 2 252.67 22.9
 -6 0 2 236.18 22.4
 -6 0 2 232.68 25.6
 -6 0 2 223.98 26.6
 -6 0 2 248.28 22.5
 -6 0 2 212.68 21
 -6 0 2 276.87 24.4
 5 0 -2 58.59 12.3
 5 0 -2 58.39 9.8
 5 0 -2 52.09 12.6
 5 0 -2 81.69 17.7
 5 0 -2 54.79 9.6
 5 0 -2 55.89 9.9
 5 0 -2 54.79 11.7
 5 0 -2 56.99 10.7
 -5 0 2 53.09 13.1
 -5 0 2 56.49 9.8
 -5 0 2 55.99 9.1
 -5 0 2 65.69 10.5
 -5 0 2 65.79 10.8
 -5 0 2 55.39 13.1
 -5 0 2 61.59 10.3
 -5 0 2 49.7 11.8
 -5 0 2 62.59 13.3
 4 0 -2 -7.7 9.7
 4 0 -2 -6.6 6.2
 4 0 -2 2.6 5.1
 4 0 -2 0.5 6.5
 4 0 -2 -10.6 6.4
 4 0 -2 -3.4 6.9
 4 0 -2 -5.2 5.5
 4 0 -2 2.9 6.7
 -4 0 2 -4.6 4.6
 -4 0 2 1.7 7.6
 -4 0 2 6.7 8.5
 -4 0 2 -1.7 7.9
 -4 0 2 -9.3 8
 -4 0 2 -5.9 8.2
 -4 0 2 -0.3 5.1
 -4 0 2 1.7 5.3
 -4 0 2 7.6 5.5
 3 0 -2 4060.99 253.97
 3 0 -2 4104.89 256.07
 3 0 -2 4261.77 254.67
 3 0 -2 3784.22 254.97
 3 0 -2 4460.55 255.77
 3 0 -2 4175.48 255.67
 3 0 -2 3565.34 254.27
 3 0 -2 3642.34 254.97
 -3 0 2 3957.9 254.37
 -3 0 2 4091.29 254.97
 -3 0 2 4103.99 255.97
 -3 0 2 3911.91 256.87
 -3 0 2 4450.15 254.37
 -3 0 2 3944.71 253.97
 -3 0 2 3864.01 254.97
 2 0 -2 159.58 15.6
 2 0 -2 180.88 13.2
 2 0 -2 147.49 13
 2 0 -2 194.68 15.4
 2 0 -2 144.09 13.8
 2 0 -2 133.79 14.4
 2 0 -2 145.99 14.3
 2 0 -2 191.18 14.2
 2 0 -2 183.08 13.6
 -2 0 2 167.28 15.6
 -2 0 2 185.98 12.6
 -2 0 2 192.98 15.6
 -2 0 2 153.08 14.1
 -2 0 2 149.19 14
 -2 0 2 188.78 13.4
 -2 0 2 169.88 13
 -2 0 2 157.58 14.1
 -2 0 2 176.18 13.8
 1 0 -2 88.49 7.7
 1 0 -2 86.19 9.4
 1 0 -2 76.39 8.9
 1 0 -2 81.79 7.6
 1 0 -2 72.79 7.1
 1 0 -2 96.89 8.5
 1 0 -2 79.19 7.2
 1 0 -2 81.29 9
 1 0 -2 74.99 7.8
 -1 0 2 92.79 7.9
 -1 0 2 79.89 7.5
 -1 0 2 93.39 8.2
 -1 0 2 88.69 9.2
 -1 0 2 77.59 8.6
 -1 0 2 66.09 6.9
 -1 0 2 85.89 7.9
 -1 0 2 86.89 9.8
 -1 0 2 86.79 7.3
 0 0 -2 425.96 30.2
 0 0 -2 457.95 30.1
 0 0 -2 501.35 30.3
 0 0 -2 409.46 30.8
 0 0 -2 446.86 30.7
 0 0 -2 480.85 30.1
 0 0 2 498.95 30.4
 0 0 2 405.26 30.1
 0 0 2 471.95 30.7
 0 0 2 436.66 30.1
 0 0 2 501.95 30.3
 -1 0 -2 57.19 7
 -1 0 -2 49.3 5.3
 -1 0 -2 61.29 5.2
 -1 0 -2 51.19 6.9
 -1 0 -2 73.19 5.4
 -1 0 -2 43.9 6.5
 -1 0 -2 57.79 6.4
 -1 0 -2 55.39 6
 -1 0 -2 52.19 6.2
 1 0 2 47.7 6.9
 1 0 2 52.19 5.8
 1 0 2 44.7 5.4
 1 0 2 62.79 5.2
 1 0 2 63.79 5.5
 1 0 2 57.19 7.4
 1 0 2 44.4 5.9
 1 0 2 57.89 6.8
 1 0 2 67.09 6.2
 1 0 2 72.69 6.3
 -2 0 -2 124.89 11.8
 -2 0 -2 144.29 10.9
 -2 0 -2 121.69 11.3
 -2 0 -2 140.39 9.9
 -2 0 -2 102.09 10.9
 -2 0 -2 146.09 9.3
 -2 0 -2 139.49 10.8
 -2 0 -2 137.49 11
 -2 0 -2 125.39 10.2
 2 0 2 132.89 11
 2 0 2 139.39 11.1
 2 0 2 121.89 10.1
 2 0 2 139.69 10.6
 2 0 2 125.79 9.5
 2 0 2 107.39 10.9
 2 0 2 132.39 10.8
 2 0 2 135.09 10
 2 0 2 119.89 11.5
 -3 0 -2 3563.44 216.88
 -3 0 -2 3483.15 215.38
 -3 0 -2 3346.87 216.98
 -3 0 -2 3775.92 216.58
 -3 0 -2 3350.36 216.78
 -3 0 -2 3327.47 215.88
 -3 0 -2 3504.35 215.88
 -3 0 -2 3478.95 216.38
 3 0 2 3591.64 216.18
 3 0 2 3513.65 216.28
 3 0 2 3369.96 216.58
 3 0 2 3284.47 215.28
 3 0 2 3320.17 216.48
 3 0 2 3261.87 215.78
 3 0 2 3152.98 217.48
 -4 0 -2 6.4 5.1
 -4 0 -2 -3.1 6.6
 -4 0 -2 -1.8 4.2
 -4 0 -2 4 5.4
 -4 0 -2 -9.9 4.4
 -4 0 -2 -7.3 4.7
 -4 0 -2 0.4 5.8
 -4 0 -2 -5 4.8
 4 0 2 10.3 6.2
 4 0 2 1.3 4.4
 4 0 2 -8.7 5.3
 4 0 2 -3.7 3.6
 4 0 2 1.6 5.6
 4 0 2 6.6 3.9
 4 0 2 -4.1 5.9
 4 0 2 1.6 4.9
 -5 0 -2 39.1 9.5
 -5 0 -2 47 7.4
 -5 0 -2 59.89 8.8
 -5 0 -2 43.8 9.4
 -5 0 -2 54.79 8.5
 -5 0 -2 57.79 9.5
 -5 0 -2 58.29 9.8
 -5 0 -2 52.29 11.4
 5 0 2 49.4 9.5
 5 0 2 63.69 11
 5 0 2 60.69 7.8
 5 0 2 64.69 7.9
 5 0 2 61.19 10.7
 5 0 2 51.39 10
 5 0 2 51.29 8.6
 -6 0 -2 217.78 17.3
 -6 0 -2 243.08 27.7
 -6 0 -2 223.48 21.4
 -6 0 -2 213.28 24.1
 -6 0 -2 203.48 20.1
 -6 0 -2 210.58 27.2
 -6 0 -2 220.28 20.1
 -6 0 -2 179.18 19.4
 6 0 2 208.18 17.3
 6 0 2 220.58 21.1
 6 0 2 206.08 24.1
 6 0 2 203.78 16.9
 6 0 2 200.28 20.8
 6 0 2 173.08 24.2
 6 0 2 213.78 21.6
 6 0 2 234.28 21.4
 6 0 2 193.58 19.5
 -7 0 -2 38.8 11
 -7 0 -2 24.9 10.7
 -7 0 -2 45.3 11.7
 -7 0 -2 24.2 15.3
 -7 0 -2 48.3 11.8
 -7 0 -2 40.3 9.2
 -7 0 -2 26.4 12.2
 7 0 2 39.8 12.2
 7 0 2 38.4 9.2
 7 0 2 36.7 13.5
 7 0 2 37.4 11.4
 7 0 2 22.4 13.4
 7 0 2 38.1 12.2
 7 0 2 61.39 12.3
 7 0 2 64.39 14.1
 -8 0 -2 -2.3 8.2
 -8 0 -2 25 16.2
 -8 0 -2 0.7 11.8
 -8 0 -2 -11.5 11.7
 -8 0 -2 -10.8 10.8
 -8 0 -2 -3.7 10.9
 -8 0 -2 11.3 16.2
 8 0 2 22.1 13.8
 8 0 2 -5.1 16.7
 8 0 2 5.1 11
 8 0 2 -4 12.8
 8 0 2 -7.9 13.8
 8 0 2 -9.6 10
 8 0 2 10.7 12.4
 8 0 2 17.3 10.6
 -9 0 -2 263.17 28.3
 -9 0 -2 228.28 29.1
 -9 0 -2 299.27 42.4
 -9 0 -2 259.77 31.3
 9 0 2 280.27 26
 9 0 2 318.07 35.6
 9 0 2 241.98 32.1
 9 0 2 253.17 31.8
 9 0 2 301.67 28.4
 9 0 2 263.97 26.6
 9 0 2 238.18 30.6
 -10 0 -2 37.4 19.2
 -10 0 -2 45.9 17.3
 -10 0 -2 52.69 15.8
 10 0 2 19.5 19.4
 10 0 2 -3.6 15.6
 10 0 2 15.5 17.1
 10 0 2 -14.6 18.7
 10 0 2 18.9 14.2
 10 0 2 40.7 25.2
 -11 0 -2 10 21.8
 -11 0 -2 53.59 20
 -11 0 -2 29.6 17.7
 -11 0 -2 39.3 22.2
 11 0 2 53.79 31.5
 11 0 2 49 18.3
 11 0 2 68.99 25.2
 11 0 2 42.5 21.5
 11 0 2 33 23.6
 -12 0 -2 -24.7 25.3
 -12 0 -2 -11.5 23.9
 -12 0 -2 10.9 22.7
 12 0 2 25.3 26.5
 12 0 2 -5.6 27.6
 12 0 2 17.1 18.9
 12 0 2 -4.7 36.2
 12 0 2 23.1 23
 -13 0 -2 34.8 31.8
 -13 0 -2 75.19 33.9
 13 0 2 97.49 27
 13 0 2 80.49 35.2
 13 0 2 18.6 30.2
 -14 0 -2 86.49 40.2
 14 0 2 -43.6 43.3
 14 0 2 120.19 62.89
 14 0 2 -5.7 36.1
 14 0 2 -21.8 25.7
 -15 0 -2 166.98 50.39
 15 0 2 94.09 45.2
 15 0 2 18.6 58.99
 15 0 2 -36.1 53.29
 -16 0 -2 39.7 58.99
 16 0 2 -48.7 64.09
 16 0 2 -34.5 51.89
 16 0 2 -7.4 60.79
 15 -1 -2 59.79 51.99
 15 -1 -2 5.7 48.4
 15 -1 -2 -16.3 53.49
 15 -1 -2 64.99 48.2
 -15 1 2 41.8 46.6
 -15 1 2 76.99 63.19
 14 -1 -2 -43.8 39.4
 14 -1 -2 -15.5 37.9
 14 -1 -2 -16.2 41.8
 14 -1 -2 -16.3 44.7
 -14 1 2 23.9 50.39
 -14 1 2 49 38.7
 13 -1 -2 -22.3 42.7
 13 -1 -2 73.49 34
 13 -1 -2 -62.49 41.6
 13 -1 -2 -55.99 38.1
 -13 1 2 -0.5 35.2
 -13 1 2 5.3 20.2
 -13 1 2 -43.5 44.8
 -13 1 2 16.7 33.3
 12 -1 -2 -43.6 59.39
 12 -1 -2 49.9 28
 12 -1 -2 3.3 28.8
 12 -1 -2 3.6 30.2
 12 -1 -2 6.5 28.5
 -12 1 2 -25.1 28.5
 -12 1 2 -22.4 24.6
 -12 1 2 -16.4 16.1
 -12 1 2 -23.5 32.9
 11 -1 -2 -29.6 23.5
 11 -1 -2 -17.3 23
 11 -1 -2 -31.2 28.3
 11 -1 -2 18.1 40.7
 11 -1 -2 4.6 22.4
 -11 1 2 -29.5 20.6
 -11 1 2 4.8 35.7
 -11 1 2 53.89 26
 -11 1 2 -12.9 13.9
 -11 1 2 19.5 25.6
 10 -1 -2 138.19 32.5
 10 -1 -2 98.19 23.6
 10 -1 -2 115.09 36.7
 10 -1 -2 139.09 31.3
 10 -1 -2 118.19 24.6
 -10 1 2 101.89 22.6
 -10 1 2 146.59 25.6
 -10 1 2 92.19 15.8
 -10 1 2 98.69 27.6
 -10 1 2 153.68 28.8
 9 -1 -2 18.1 17
 9 -1 -2 26.1 17.3
 9 -1 -2 19.8 21.4
 9 -1 -2 32.7 16.1
 9 -1 -2 5.7 27.2
 9 -1 -2 24.8 17.6
 9 -1 -2 5.6 17.4
 -9 1 2 46.7 18.8
 -9 1 2 45.8 11.6
 -9 1 2 0.4 19.9
 -9 1 2 30.4 15.5
 -9 1 2 -19.3 16.9
 8 -1 -2 88.99 19.5
 8 -1 -2 146.29 27.6
 8 -1 -2 137.09 22.9
 8 -1 -2 110.19 19
 8 -1 -2 120.09 24.2
 8 -1 -2 143.39 24.3
 8 -1 -2 143.29 21
 8 -1 -2 143.49 18.3
 8 -1 -2 117.49 20.5
 8 -1 -2 176.98 21.9
 -8 1 2 155.08 21.2
 -8 1 2 202.68 25.1
 -8 1 2 132.59 15.1
 -8 1 2 106.69 26.1
 -8 1 2 129.19 21
 -8 1 2 109.49 28.8
 -8 1 2 120.79 22.3
 7 -1 -2 14.6 10.5
 7 -1 -2 39.1 14.6
 7 -1 -2 18.3 11.3
 7 -1 -2 36.9 15.5
 7 -1 -2 43.4 13.9
 7 -1 -2 34.1 19.9
 7 -1 -2 28.7 13.2
 7 -1 -2 11.9 12.4
 7 -1 -2 25.6 14.3
 7 -1 -2 28.7 12.6
 -7 1 2 43 13.6
 -7 1 2 11.1 17.8
 -7 1 2 19.4 17.4
 -7 1 2 29.9 15.1
 -7 1 2 13.2 10.6
 -7 1 2 16.4 13.1
 6 -1 -2 266.67 22
 6 -1 -2 250.07 24.7
 6 -1 -2 274.07 24.4
 6 -1 -2 248.88 25.6
 6 -1 -2 268.47 22.4
 6 -1 -2 228.78 24.4
 6 -1 -2 212.58 28.2
 6 -1 -2 230.18 33.3
 -6 1 2 229.58 28
 -6 1 2 285.37 20.3
 -6 1 2 256.67 25.2
 -6 1 2 221.78 27.2
 -6 1 2 238.18 26.2
 -6 1 2 258.67 22.9
 -6 1 2 239.28 23.4
 -6 1 2 234.68 24.5
 5 -1 -2 770.12 55.99
 5 -1 -2 892.41 56.59
 5 -1 -2 781.02 52.59
 5 -1 -2 782.02 54.79
 5 -1 -2 842.62 53.39
 5 -1 -2 817.32 54.49
 5 -1 -2 767.62 56.39
 5 -1 -2 790.62 56.99
 5 -1 -2 742.03 53.29
 -5 1 2 783.52 56.19
 -5 1 2 703.53 52.69
 -5 1 2 737.63 52.29
 -5 1 2 771.52 56.19
 -5 1 2 817.12 54.39
 -5 1 2 811.32 54.39
 -5 1 2 787.02 53.89
 -5 1 2 785.82 55.99
 -5 1 2 804.02 52.19
 4 -1 -2 15.9 8
 4 -1 -2 26.6 9
 4 -1 -2 27.9 11.3
 4 -1 -2 27.4 7.6
 4 -1 -2 39.2 7.5
 4 -1 -2 45 9.4
 4 -1 -2 29.1 9.7
 -4 1 2 28.3 8.2
 -4 1 2 13.7 8.8
 -4 1 2 37.8 6.7
 -4 1 2 28 10.6
 -4 1 2 42.4 7.2
 -4 1 2 16.9 10.1
 -4 1 2 22.4 7.3
 -4 1 2 38.8 8.1
 3 -1 -2 776.72 55.09
 3 -1 -2 772.62 56.09
 3 -1 -2 875.41 55.49
 3 -1 -2 857.31 56.39
 3 -1 -2 823.72 58.49
 3 -1 -2 911.01 54.09
 3 -1 -2 830.22 55.69
 3 -1 -2 845.62 54.69
 -3 1 2 830.12 55.19
 -3 1 2 800.22 56.59
 -3 1 2 807.02 55.29
 -3 1 2 905.71 54.19
 -3 1 2 801.42 55.19
 -3 1 2 802.82 56.29
 -3 1 2 874.51 54.29
 -3 1 2 764.32 54.89
 -3 1 2 847.72 56.79
 2 -1 -2 283.77 22.7
 2 -1 -2 264.97 21.5
 2 -1 -2 316.07 21.2
 2 -1 -2 266.57 22
 2 -1 -2 300.57 21.7
 2 -1 -2 278.37 22.6
 2 -1 -2 229.98 21.2
 2 -1 -2 291.47 20.7
 -2 1 2 283.97 22.5
 -2 1 2 265.07 22.4
 -2 1 2 343.57 19.8
 -2 1 2 293.37 20.4
 -2 1 2 258.67 22.3
 -2 1 2 326.87 21
 -2 1 2 278.57 21.2
 -2 1 2 303.07 21.1
 1 -1 -2 12.1 5.7
 1 -1 -2 13.9 4.7
 1 -1 -2 21.4 6.6
 1 -1 -2 25.1 5.2
 1 -1 -2 22.9 5.5
 1 -1 -2 14.8 3.1
 1 -1 -2 14.5 5.1
 -1 1 2 19.3 4.5
 -1 1 2 19 5.5
 -1 1 2 20.4 7.6
 -1 1 2 18.8 3.2
 -1 1 2 8.8 4.4
 -1 1 2 14.5 6.4
 -1 1 2 24.8 4.4
 0 -1 -2 878.91 57.79
 0 -1 -2 829.02 57.19
 0 -1 -2 846.52 57.29
 0 -1 -2 929.31 57.99
 0 -1 -2 964 57.69
 0 -1 -2 991.7 57.79
 0 1 2 931.11 57.59
 0 1 2 816.22 57.29
 0 1 2 990.6 58.59
 0 1 2 797.22 56.79
 0 1 2 810.72 57.19
 0 1 2 868.31 57.59
 0 1 2 958.9 57.89
 0 1 2 881.51 57.89
 -1 -1 -2 -0.1 2.2
 -1 -1 -2 -0.8 3.8
 -1 -1 -2 1.2 2.5
 -1 -1 -2 3.3 3.7
 -1 -1 -2 -0.2 2.5
 -1 -1 -2 -0.8 2.7
 -1 -1 -2 2.9 2.7
 -1 -1 -2 5.5 2.5
 -1 -1 -2 -0.7 3.3
 1 1 2 0.7 4
 1 1 2 -2.8 2.6
 1 1 2 1.1 2.6
 1 1 2 -1.8 3.1
 1 1 2 -2.8 2.7
 1 1 2 -1 3.1
 1 1 2 1.3 2.7
 1 1 2 1.8 2.7
 1 1 2 -2.7 3
 -2 -1 -2 1000.1 62.79
 -2 -1 -2 912.31 62.89
 -2 -1 -2 901.91 62.29
 -2 -1 -2 1027.3 62.49
 -2 -1 -2 1054.19 63.09
 -2 -1 -2 1012.8 61.99
 -2 -1 -2 880.11 62.29
 -2 -1 -2 1035.7 62.59
 2 1 2 1013.2 62.49
 2 1 2 963.6 62.49
 2 1 2 924.71 61.99
 2 1 2 849.91 62.79
 2 1 2 921.91 62.19
 2 1 2 952.6 62.79
 2 1 2 995.2 62.69
 2 1 2 1001.6 62.39
 2 1 2 1018.9 62.79
 -3 -1 -2 1220.38 77.49
 -3 -1 -2 1125.69 76.69
 -3 -1 -2 1284.77 76.89
 -3 -1 -2 1166.78 76.49
 -3 -1 -2 1226.38 77.39
 -3 -1 -2 1120.59 77.59
 3 1 2 1197.08 76.89
 3 1 2 1189.18 76.19
 3 1 2 1175.68 77.59
 3 1 2 1306.37 77.59
 3 1 2 1149.39 76.39
 3 1 2 1185.18 77.39
 3 1 2 1202.88 76.69
 -4 -1 -2 48.4 7.4
 -4 -1 -2 61.09 9.7
 -4 -1 -2 49.9 8.2
 -4 -1 -2 65.79 9
 -4 -1 -2 46.5 8
 -4 -1 -2 66.49 9.2
 -4 -1 -2 68.99 7.6
 4 1 2 52.99 7.2
 4 1 2 56.79 9.2
 4 1 2 59.09 9.4
 4 1 2 48 7.9
 4 1 2 51.09 8.8
 4 1 2 56.69 9.1
 4 1 2 57.49 8.2
 4 1 2 58.09 7.6
 -5 -1 -2 1425.36 93.09
 -5 -1 -2 1352.26 93.79
 -5 -1 -2 1463.35 95.09
 -5 -1 -2 1510.35 93.59
 -5 -1 -2 1430.46 94.79
 -5 -1 -2 1516.45 94.19
 -5 -1 -2 1414.56 94.09
 5 1 2 1447.36 94.39
 5 1 2 1509.95 94.59
 5 1 2 1438.36 94.59
 5 1 2 1380.36 93.49
 5 1 2 1451.05 92.99
 5 1 2 1493.55 94.79
 5 1 2 1365.16 92.69
 5 1 2 1491.25 94.49
 -6 -1 -2 157.58 18.6
 -6 -1 -2 136.29 15.7
 -6 -1 -2 152.68 14
 -6 -1 -2 167.48 15.6
 -6 -1 -2 138.19 17.7
 -6 -1 -2 123.89 16
 -6 -1 -2 126.99 16.5
 6 1 2 154.88 17.9
 6 1 2 122.99 16.2
 6 1 2 131.29 15.2
 6 1 2 162.38 20.1
 6 1 2 126.39 14.1
 6 1 2 135.19 18.8
 6 1 2 145.29 17.3
 6 1 2 117.49 13.1
 6 1 2 159.58 17.1
 -7 -1 -2 21.9 10.4
 -7 -1 -2 -12.1 10
 -7 -1 -2 14.2 9.6
 -7 -1 -2 -9.7 9.1
 -7 -1 -2 4 9.5
 -7 -1 -2 13.3 10.4
 -7 -1 -2 8.8 13.3
 7 1 2 6.7 9.6
 7 1 2 7.7 10.7
 7 1 2 7 10
 7 1 2 -13 12.7
 7 1 2 13.3 9.7
 7 1 2 13.3 7.8
 7 1 2 30.8 12.2
 7 1 2 -10.5 9.1
 -8 -1 -2 82.79 15.1
 -8 -1 -2 51.99 13.9
 -8 -1 -2 73.99 12.1
 -8 -1 -2 58.59 15.2
 -8 -1 -2 49.9 13.6
 -8 -1 -2 36.7 18.3
 -8 -1 -2 36.2 16
 -8 -1 -2 67.29 14.4
 8 1 2 66.29 16.3
 8 1 2 67.89 14.4
 8 1 2 59.19 15.2
 8 1 2 61.49 12.6
 8 1 2 46.4 15.1
 8 1 2 75.19 16.1
 8 1 2 46 12.6
 8 1 2 68.89 15.5
 8 1 2 75.99 18
 -9 -1 -2 -27.7 19.8
 -9 -1 -2 7.3 12.6
 -9 -1 -2 9.3 11.5
 -9 -1 -2 -17.4 12.8
 -9 -1 -2 -15.8 14.4
 -9 -1 -2 7.2 14.6
 9 1 2 2.5 17
 9 1 2 15.5 13.4
 9 1 2 17.5 16.4
 9 1 2 -21.2 12.2
 9 1 2 4 11.9
 9 1 2 6.1 19.1
 9 1 2 4.1 15.1
 -10 -1 -2 73.59 18.9
 -10 -1 -2 100.29 21.2
 -10 -1 -2 89.59 16.6
 -10 -1 -2 89.39 21
 -10 -1 -2 59.19 19.1
 10 1 2 56.69 20.6
 10 1 2 63.99 21.8
 10 1 2 61.49 19.2
 10 1 2 69.79 18.9
 10 1 2 63.99 25.4
 10 1 2 91.89 18.1
 -11 -1 -2 132.89 27.1
 -11 -1 -2 150.88 23.9
 -11 -1 -2 127.19 19
 -11 -1 -2 99.79 24.3
 -11 -1 -2 99.39 25.3
 11 1 2 57.99 24.2
 11 1 2 119.19 26.3
 11 1 2 107.49 26.3
 11 1 2 128.49 21.5
 11 1 2 94.29 31.4
 -12 -1 -2 -26.5 23.8
 -12 -1 -2 -5.1 17.6
 -12 -1 -2 -37.5 22.4
 -12 -1 -2 25.3 21.7
 -12 -1 -2 33.2 25.8
 12 1 2 19.5 20
 12 1 2 37.1 28.8
 12 1 2 -3.3 36.2
 12 1 2 7.9 23.4
 12 1 2 28.5 25.9
 -13 -1 -2 38.5 30.1
 -13 -1 -2 22.5 21.6
 -13 -1 -2 14.8 28.2
 13 1 2 7.1 22.7
 13 1 2 -20.9 58.59
 13 1 2 -22.2 29.8
 13 1 2 -26.2 27.5
 -14 -1 -2 29.2 38.1
 -14 -1 -2 10.6 34.2
 14 1 2 14.6 49.7
 14 1 2 47.6 36.8
 14 1 2 -17.3 26.2
 14 1 2 15.2 37.7
 -15 -1 -2 17.8 45.1
 15 1 2 -98.29 59.49
 15 1 2 13.5 32.4
 15 1 2 34.8 42.6
 15 1 2 -16.3 40
 -16 -1 -2 93.09 58.59
 16 1 2 81.69 66.39
 16 1 2 -42.2 62.89
 16 1 2 -45.7 51.09
 15 -2 -2 96.39 54.59
 15 -2 -2 37.5 50.79
 15 -2 -2 -20.6 59.09
 -15 2 2 -4.9 65.79
 -15 2 2 86.89 50.69
 14 -2 -2 -17.8 38.7
 14 -2 -2 -80.69 40.6
 14 -2 -2 32.8 57.39
 14 -2 -2 -81.29 42.8
 -14 2 2 -5.2 39.4
 -14 2 2 41.9 54.99
 13 -2 -2 87.59 36.5
[truncated: 1,939,070 more chars]
