# Supplementary material for: Nucleophilic Substitution at a Coordinatively Saturated Five-Membered NHC∙Haloborane Centre
Source: MDPI journal article supplement (doi:10.3390/inorganics10070097), 2022-07-07
Supplement: s1 [file s1 › Cif_4.cif]

data_mo_gk_5221_0m_a
_audit_creation_date               2022-06-05
_audit_creation_method
;
Olex2 1.5
(compiled 2021.08.20 svn.r13c46975 for OlexSys, GUI svn.r6405)
;
_shelx_SHELXL_version_number       '2016/6'
_audit_contact_author_address      ?
_audit_contact_author_email        ?
_audit_contact_author_name         ''
_audit_contact_author_phone        ?
_publ_contact_author_id_orcid      ?
_publ_section_references
;
Bourhis, L.J., Dolomanov, O.V., Gildea, R.J., Howard, J.A.K., Puschmann, H.
 (2015). Acta Cryst. A71, 59-75.

Dolomanov, O.V., Bourhis, L.J., Gildea, R.J, Howard, J.A.K. & Puschmann, H.
 (2009), J. Appl. Cryst. 42, 339-341.

Sheldrick, G.M. (2015). Acta Cryst. C71, 3-8.
;
_chemical_name_common              ?
_chemical_name_systematic          ?
_chemical_formula_moiety           'C28 H39 B Cl F3 N2 O3 S, C7 H8'
_chemical_formula_sum              'C35 H47 B Cl F3 N2 O3 S'
_chemical_formula_weight           679.06
_chemical_melting_point            ?
loop_
  _atom_type_symbol
  _atom_type_description
  _atom_type_scat_dispersion_real
  _atom_type_scat_dispersion_imag
  _atom_type_scat_source
 'C' 'C' 0.0033 0.0016 'International Tables Vol C Tables 4.2.6.8 and 6.1.1.4'
 'H' 'H' 0.0000 0.0000 'International Tables Vol C Tables 4.2.6.8 and 6.1.1.4'
 'B' 'B' 0.0013 0.0007 'International Tables Vol C Tables 4.2.6.8 and 6.1.1.4'
 'Cl' 'Cl' 0.1484 0.1585 'International Tables Vol C Tables 4.2.6.8 and 6.1.1.4'
 'F' 'F' 0.0171 0.0103 'International Tables Vol C Tables 4.2.6.8 and 6.1.1.4'
 'N' 'N' 0.0061 0.0033 'International Tables Vol C Tables 4.2.6.8 and 6.1.1.4'
 'O' 'O' 0.0106 0.0060 'International Tables Vol C Tables 4.2.6.8 and 6.1.1.4'
 'S' 'S' 0.1246 0.1234 'International Tables Vol C Tables 4.2.6.8 and 6.1.1.4'

_shelx_space_group_comment
;
The symmetry employed for this shelxl refinement is uniquely defined
by the following loop, which should always be used as a source of
symmetry information in preference to the above space-group names.
They are only intended as comments.
;
_space_group_crystal_system        'monoclinic'
_space_group_IT_number             14
_space_group_name_H-M_alt          'P 1 21/n 1'
_space_group_name_Hall             '-P 2yn'
loop_
  _space_group_symop_operation_xyz
 'x, y, z'
 '-x+1/2, y+1/2, -z+1/2'
 '-x, -y, -z'
 'x-1/2, -y-1/2, z-1/2'

_cell_length_a                     12.286(3)
_cell_length_b                     14.731(3)
_cell_length_c                     20.644(4)
_cell_angle_alpha                  90
_cell_angle_beta                   104.789(9)
_cell_angle_gamma                  90
_cell_volume                       3612.8(13)
_cell_formula_units_Z              4
_cell_measurement_reflns_used      5485
_cell_measurement_temperature      100
_cell_measurement_theta_max        28.21
_cell_measurement_theta_min        2.47
_shelx_estimated_absorpt_T_max     0.981
_shelx_estimated_absorpt_T_min     0.969
_exptl_absorpt_coefficient_mu      0.215
_exptl_absorpt_correction_T_max    0.7460
_exptl_absorpt_correction_T_min    0.6442
_exptl_absorpt_correction_type     multi-scan
_exptl_absorpt_process_details    
 'SADABS-2016/2 (Bruker,2016/2) was used for absorption correction. wR2(int) was 0.1103 before and 0.0710 after correction. The Ratio of minimum to maximum transmission is 0.8635. The \l/2 correction factor is Not present.'
_exptl_absorpt_special_details     ?
_exptl_crystal_colour              colourless
_exptl_crystal_colour_primary      colourless
_exptl_crystal_density_diffrn      1.248
_exptl_crystal_density_meas        ?
_exptl_crystal_density_method      ?
_exptl_crystal_description         block
_exptl_crystal_F_000               1440
_exptl_crystal_size_max            0.15
_exptl_crystal_size_mid            0.12
_exptl_crystal_size_min            0.09
_exptl_transmission_factor_max     ?
_exptl_transmission_factor_min     ?
_diffrn_reflns_av_R_equivalents    0.0481
_diffrn_reflns_av_unetI/netI       0.0288
_diffrn_reflns_Laue_measured_fraction_full  0.999
_diffrn_reflns_Laue_measured_fraction_max  0.999
_diffrn_reflns_limit_h_max         15
_diffrn_reflns_limit_h_min         -15
_diffrn_reflns_limit_k_max         18
_diffrn_reflns_limit_k_min         -18
_diffrn_reflns_limit_l_max         25
_diffrn_reflns_limit_l_min         -25
_diffrn_reflns_number              53931
_diffrn_reflns_point_group_measured_fraction_full  0.999
_diffrn_reflns_point_group_measured_fraction_max  0.999
_diffrn_reflns_theta_full          25.242
_diffrn_reflns_theta_max           26.499
_diffrn_reflns_theta_min           2.041
_diffrn_ambient_temperature        100.0
_diffrn_detector_area_resol_mean   ?
_diffrn_measured_fraction_theta_full  0.999
_diffrn_measured_fraction_theta_max  0.999
_diffrn_measurement_device_type    'Bruker D8 VENTURE Kappa Duo PHOTON II CPAD'
_diffrn_measurement_method         '\f and \w scans'
_diffrn_radiation_type             MoK\a
_diffrn_radiation_wavelength       0.71073
_diffrn_source                     ?
_diffrn_standards_number           0
_reflns_Friedel_coverage           0.000
_reflns_Friedel_fraction_full      .
_reflns_Friedel_fraction_max       .
_reflns_number_gt                  7054
_reflns_number_total               7489
_reflns_special_details
;
 Reflections were merged by SHELXL according to the crystal
 class for the calculation of statistics and refinement.
 
 _reflns_Friedel_fraction is defined as the number of unique
 Friedel pairs measured divided by the number that would be
 possible theoretically, ignoring centric projections and
 systematic absences.
;
_reflns_threshold_expression       'I > 2\s(I)'
_computing_cell_refinement         'SAINT V8.40A (?, 2016)'
_computing_data_collection         ?
_computing_data_reduction          'SAINT V8.40A (?, 2016)'
_computing_molecular_graphics      'Olex2 1.5 (Dolomanov et al., 2009)'
_computing_publication_material    'Olex2 1.5 (Dolomanov et al., 2009)'
_computing_structure_refinement    'ShelXL (Sheldrick, 2015)'
_computing_structure_solution      'olex2.solve (Bourhis et al., 2015)'
_refine_diff_density_max           1.347
_refine_diff_density_min           -0.845
_refine_diff_density_rms           0.202
_refine_ls_extinction_coef         .
_refine_ls_extinction_method       none
_refine_ls_goodness_of_fit_ref     1.058
_refine_ls_hydrogen_treatment      constr
_refine_ls_matrix_type             full
_refine_ls_number_parameters       424
_refine_ls_number_reflns           7489
_refine_ls_number_restraints       0
_refine_ls_R_factor_all            0.0580
_refine_ls_R_factor_gt             0.0541
_refine_ls_restrained_S_all        1.058
_refine_ls_shift/su_max            0.001
_refine_ls_shift/su_mean           0.000
_refine_ls_structure_factor_coef   Fsqd
_refine_ls_weighting_details      
 'w=1/[\s^2^(Fo^2^)+(0.0874P)^2^+3.5826P] where P=(Fo^2^+2Fc^2^)/3'
_refine_ls_weighting_scheme        calc
_refine_ls_wR_factor_gt            0.1529
_refine_ls_wR_factor_ref           0.1580
_refine_special_details            ?
_olex2_refinement_description
;
1.a Ternary CH refined with riding coordinates:
 C00I(H00I), C00J(H00J), C00S(H00S), C00Z(H00Z), B015(H015)
1.b Secondary CH2 refined with riding coordinates:
 C00G(H00A,H00B), C00O(H00F,H00G)
1.c Aromatic/amide H refined with riding coordinates:
 C00L(H00L), C00M(H00M), C00P(H00P), C00Q(H00Q), C00T(H00T), C00U(H00U),
 C00Y(H00Y), C016(H016), C017(H017), C018(H018), C019(H019)
1.d Idealised Me refined as rotating group:
 C00K(H00C,H00D,H00E), C00R(H00H,H00K,H00N), C00X(H00O,H00R,H00V), C010(H01A,
 H01B,H01C), C011(H01D,H01E,H01F), C012(H01G,H01H,H01I), C013(H01J,H01K,H01L),
 C014(H01P,H01Q,H01R), C01A(H01M,H01N,H01O)
;
_atom_sites_solution_hydrogens     geom
_atom_sites_solution_primary       iterative
_atom_sites_solution_secondary     ?
loop_
  _atom_site_label
  _atom_site_type_symbol
  _atom_site_fract_x
  _atom_site_fract_y
  _atom_site_fract_z
  _atom_site_U_iso_or_equiv
  _atom_site_adp_type
  _atom_site_occupancy
  _atom_site_site_symmetry_order
  _atom_site_calc_flag
  _atom_site_refinement_flags_posn
  _atom_site_refinement_flags_adp
  _atom_site_refinement_flags_occupancy
  _atom_site_disorder_assembly
  _atom_site_disorder_group
 Cl01 Cl 0.30058(4) 0.28289(3) 0.79331(2) 0.02472(14) Uani 1 1 d . . . . .
 S02 S 0.50837(4) 0.21450(3) 0.70976(3) 0.02418(14) Uani 1 1 d . . . A 1
 O003 O 0.43891(11) 0.30079(9) 0.70570(7) 0.0219(3) Uani 1 1 d . . . . .
 F004 F 0.68980(13) 0.16925(11) 0.79935(9) 0.0497(4) Uani 1 1 d . . . . .
 F005 F 0.57447(14) 0.24766(14) 0.83834(8) 0.0557(5) Uani 1 1 d . . . . .
 F006 F 0.67380(13) 0.31244(11) 0.78089(10) 0.0556(5) Uani 1 1 d . . . . .
 N007 N 0.33018(12) 0.48317(10) 0.71785(7) 0.0141(3) Uani 1 1 d . . . . .
 N008 N 0.16880(13) 0.42992(10) 0.65987(8) 0.0160(3) Uani 1 1 d . . . . .
 O009 O 0.45065(14) 0.13610(10) 0.72336(9) 0.0325(4) Uani 1 1 d . . . . .
 O00A O 0.56573(16) 0.21302(12) 0.65833(9) 0.0397(4) Uani 1 1 d . . . . .
 C00B C 0.27442(14) 0.40886(12) 0.69236(8) 0.0140(3) Uani 1 1 d . . . . .
 C00C C 0.08555(15) 0.37268(12) 0.61657(9) 0.0179(4) Uani 1 1 d . . . . .
 C00D C 0.44930(14) 0.49500(11) 0.74763(9) 0.0146(3) Uani 1 1 d . . . . .
 C00E C 0.48805(15) 0.50549(12) 0.81701(9) 0.0170(4) Uani 1 1 d . . . . .
 C00F C 0.09246(15) 0.35909(13) 0.55052(10) 0.0210(4) Uani 1 1 d . . . . .
 C00G C 0.14884(16) 0.52903(12) 0.65950(9) 0.0190(4) Uani 1 1 d . . . . .
 H00A H 0.082083 0.543588 0.676111 0.023 Uiso 1 1 calc R . . . .
 H00B H 0.138466 0.554699 0.614007 0.023 Uiso 1 1 calc R . . . .
 C00H C -0.00471(15) 0.34028(13) 0.64027(10) 0.0211(4) Uani 1 1 d . . . . .
 C00I C 0.18979(17) 0.39380(15) 0.52446(10) 0.0260(4) Uani 1 1 d . . . . .
 H00I H 0.238504 0.432206 0.560310 0.031 Uiso 1 1 calc R . . . .
 C00J C 0.41134(17) 0.49788(12) 0.86390(9) 0.0194(4) Uani 1 1 d . . . . .
 H00J H 0.335875 0.476557 0.837293 0.023 Uiso 1 1 calc R . . . .
 C00K C 0.39651(19) 0.59144(13) 0.89353(10) 0.0249(4) Uani 1 1 d . . . . .
 H00C H 0.469556 0.613234 0.920274 0.037 Uiso 1 1 calc GR . . . .
 H00D H 0.344177 0.586339 0.922098 0.037 Uiso 1 1 calc GR . . . .
 H00E H 0.366342 0.634375 0.857117 0.037 Uiso 1 1 calc GR . . . .
 C00L C 0.00512(17) 0.31043(14) 0.50762(10) 0.0260(4) Uani 1 1 d . . . . .
 H00L H 0.008118 0.299009 0.462820 0.031 Uiso 1 1 calc R . . . .
 C00M C -0.08526(17) 0.27879(14) 0.52944(12) 0.0287(5) Uani 1 1 d . . . . .
 H00M H -0.144327 0.246916 0.499377 0.034 Uiso 1 1 calc R . . . .
 C00N C 0.52009(16) 0.50502(13) 0.70428(10) 0.0198(4) Uani 1 1 d . . . . .
 C00O C 0.25669(16) 0.56420(12) 0.70719(10) 0.0209(4) Uani 1 1 d . . . . .
 H00F H 0.289956 0.614300 0.686643 0.025 Uiso 1 1 calc R . . . .
 H00G H 0.242695 0.585571 0.749809 0.025 Uiso 1 1 calc R . . . .
 C00P C -0.09021(17) 0.29328(14) 0.59482(11) 0.0264(4) Uani 1 1 d . . . . .
 H00P H -0.152763 0.270938 0.609151 0.032 Uiso 1 1 calc R . . . .
 C00Q C 0.60194(17) 0.52705(14) 0.84261(10) 0.0244(4) Uani 1 1 d . . . . .
 H00Q H 0.630857 0.534941 0.889539 0.029 Uiso 1 1 calc R . . . .
 C00R C 0.4562(2) 0.42926(14) 0.92016(10) 0.0283(5) Uani 1 1 d . . . . .
 H00H H 0.466888 0.370314 0.900671 0.042 Uiso 1 1 calc GR . . . .
 H00K H 0.402000 0.422900 0.947443 0.042 Uiso 1 1 calc GR . . . .
 H00N H 0.528299 0.450690 0.948351 0.042 Uiso 1 1 calc GR . . . .
 C00S C -0.01204(17) 0.35498(14) 0.71178(10) 0.0236(4) Uani 1 1 d . . . . .
 H00S H 0.060030 0.383445 0.737363 0.028 Uiso 1 1 calc R . . . .
 C00T C 0.63275(17) 0.52560(14) 0.73265(11) 0.0243(4) Uani 1 1 d . . . . .
 H00T H 0.682786 0.531878 0.704631 0.029 Uiso 1 1 calc R . . . .
 C00U C 0.67280(17) 0.53704(15) 0.80111(11) 0.0272(4) Uani 1 1 d . . . . .
 H00U H 0.749713 0.551888 0.819613 0.033 Uiso 1 1 calc R . . . .
 C00V C 0.64166(18) -0.00136(17) 0.50384(12) 0.0330(5) Uani 1 1 d . . . . .
 C00W C 0.61866(19) 0.23861(16) 0.78647(12) 0.0331(5) Uani 1 1 d . . . . .
 C00X C 0.1495(2) 0.45271(17) 0.46246(11) 0.0334(5) Uani 1 1 d . . . . .
 H00O H 0.103631 0.416090 0.425917 0.050 Uiso 1 1 calc GR . . . .
 H00R H 0.214626 0.477036 0.448980 0.050 Uiso 1 1 calc GR . . . .
 H00V H 0.104164 0.502980 0.472524 0.050 Uiso 1 1 calc GR . . . .
 C00Y C 0.64282(19) 0.08697(17) 0.52749(13) 0.0357(5) Uani 1 1 d . . . . .
 H00Y H 0.644571 0.097260 0.573170 0.043 Uiso 1 1 calc R . . . .
 C00Z C 0.47697(19) 0.49788(18) 0.62877(10) 0.0323(5) Uani 1 1 d . . . . .
 H00Z H 0.403212 0.465236 0.619088 0.039 Uiso 1 1 calc R . . . .
 C010 C 0.2616(2) 0.3142(2) 0.51075(13) 0.0399(6) Uani 1 1 d . . . . .
 H01A H 0.286052 0.277066 0.551274 0.060 Uiso 1 1 calc GR . . . .
 H01B H 0.327787 0.337765 0.497980 0.060 Uiso 1 1 calc GR . . . .
 H01C H 0.216868 0.276873 0.474249 0.060 Uiso 1 1 calc GR . . . .
 C011 C -0.10865(19) 0.41989(17) 0.71425(12) 0.0332(5) Uani 1 1 d . . . . .
 H01D H -0.098876 0.477143 0.692228 0.050 Uiso 1 1 calc GR . . . .
 H01E H -0.108160 0.431734 0.761036 0.050 Uiso 1 1 calc GR . . . .
 H01F H -0.180584 0.392224 0.691063 0.050 Uiso 1 1 calc GR . . . .
 C012 C -0.0261(2) 0.26471(16) 0.74588(13) 0.0357(5) Uani 1 1 d . . . . .
 H01G H -0.096863 0.235924 0.721989 0.054 Uiso 1 1 calc GR . . . .
 H01H H -0.027364 0.276102 0.792446 0.054 Uiso 1 1 calc GR . . . .
 H01I H 0.037020 0.224460 0.744968 0.054 Uiso 1 1 calc GR . . . .
 C013 C 0.5555(3) 0.44314(19) 0.59695(12) 0.0421(6) Uani 1 1 d . . . . .
 H01J H 0.624367 0.477999 0.599360 0.063 Uiso 1 1 calc GR . . . .
 H01K H 0.517748 0.430611 0.549971 0.063 Uiso 1 1 calc GR . . . .
 H01L H 0.574775 0.385723 0.621135 0.063 Uiso 1 1 calc GR . . . .
 C014 C 0.6457(2) -0.08105(18) 0.54948(15) 0.0424(6) Uani 1 1 d . . . . .
 H01P H 0.724243 -0.095013 0.571989 0.064 Uiso 1 1 calc GR . . . .
 H01Q H 0.610941 -0.133746 0.523240 0.064 Uiso 1 1 calc GR . . . .
 H01R H 0.604593 -0.066517 0.583057 0.064 Uiso 1 1 calc GR . . . .
 B015 B 0.31579(18) 0.30454(14) 0.70602(10) 0.0179(4) Uani 1 1 d . . . . .
 H015 H 0.268860 0.261985 0.672526 0.022 Uiso 1 1 calc R . . . .
 C016 C 0.6414(2) 0.1608(2) 0.48494(17) 0.0513(7) Uani 1 1 d . . . . .
 H016 H 0.641712 0.221174 0.501137 0.062 Uiso 1 1 calc R . . . .
 C017 C 0.6357(2) -0.0146(2) 0.43663(15) 0.0510(7) Uani 1 1 d . . . . .
 H017 H 0.632925 -0.074554 0.419398 0.061 Uiso 1 1 calc R . . . .
 C018 C 0.6397(2) 0.1442(3) 0.41832(18) 0.0639(11) Uani 1 1 d . . . . .
 H018 H 0.642595 0.193618 0.389224 0.077 Uiso 1 1 calc R . . . .
 C019 C 0.6338(3) 0.0578(3) 0.39464(17) 0.0669(10) Uani 1 1 d . . . . .
 H019 H 0.628260 0.047502 0.348493 0.080 Uiso 1 1 calc R . . . .
 C01A C 0.4554(4) 0.5909(3) 0.59712(14) 0.0837(15) Uani 1 1 d . . . . .
 H01M H 0.402500 0.623991 0.616778 0.126 Uiso 1 1 calc GR . . . .
 H01N H 0.423382 0.584468 0.548750 0.126 Uiso 1 1 calc GR . . . .
 H01O H 0.526495 0.624496 0.605314 0.126 Uiso 1 1 calc GR . . . .

loop_
  _atom_site_aniso_label
  _atom_site_aniso_U_11
  _atom_site_aniso_U_22
  _atom_site_aniso_U_33
  _atom_site_aniso_U_23
  _atom_site_aniso_U_13
  _atom_site_aniso_U_12
 Cl01 0.0348(3) 0.0163(2) 0.0274(3) 0.00190(17) 0.0159(2) -0.00071(17)
 S02 0.0259(3) 0.0196(3) 0.0296(3) 0.00074(18) 0.0116(2) 0.00652(18)
 O003 0.0191(7) 0.0172(6) 0.0302(7) 0.0031(5) 0.0077(5) 0.0037(5)
 F004 0.0356(8) 0.0418(9) 0.0654(10) 0.0060(7) 0.0013(7) 0.0246(7)
 F005 0.0483(9) 0.0851(13) 0.0300(8) -0.0018(8) 0.0034(7) 0.0260(9)
 F006 0.0358(8) 0.0393(9) 0.0786(12) 0.0030(8) -0.0091(8) -0.0047(7)
 N007 0.0149(7) 0.0112(7) 0.0156(7) -0.0010(5) 0.0029(5) 0.0010(5)
 N008 0.0152(7) 0.0117(7) 0.0193(7) -0.0024(6) 0.0014(6) 0.0017(6)
 O009 0.0347(8) 0.0164(7) 0.0493(10) 0.0019(6) 0.0162(7) 0.0055(6)
 O00A 0.0455(10) 0.0385(10) 0.0428(10) 0.0016(7) 0.0257(8) 0.0141(8)
 C00B 0.0158(8) 0.0144(8) 0.0123(7) -0.0011(6) 0.0048(6) -0.0008(6)
 C00C 0.0144(8) 0.0138(8) 0.0227(9) -0.0038(7) -0.0005(7) 0.0012(6)
 C00D 0.0146(8) 0.0111(7) 0.0170(8) -0.0009(6) 0.0023(6) -0.0009(6)
 C00E 0.0191(9) 0.0126(8) 0.0180(8) 0.0003(6) 0.0026(7) 0.0007(6)
 C00F 0.0162(8) 0.0193(9) 0.0249(9) -0.0048(7) 0.0004(7) 0.0029(7)
 C00G 0.0192(9) 0.0131(8) 0.0225(9) -0.0018(7) 0.0016(7) 0.0029(7)
 C00H 0.0168(8) 0.0156(8) 0.0288(10) -0.0013(7) 0.0020(7) 0.0016(7)
 C00I 0.0191(9) 0.0366(11) 0.0211(9) -0.0075(8) 0.0030(7) 0.0004(8)
 C00J 0.0266(9) 0.0169(9) 0.0146(8) -0.0007(7) 0.0050(7) -0.0004(7)
 C00K 0.0339(11) 0.0195(9) 0.0220(9) -0.0035(7) 0.0080(8) 0.0012(8)
 C00L 0.0235(10) 0.0247(10) 0.0254(10) -0.0089(8) -0.0018(8) 0.0020(8)
 C00M 0.0209(10) 0.0220(10) 0.0371(12) -0.0084(8) -0.0037(8) -0.0021(8)
 C00N 0.0201(9) 0.0193(9) 0.0208(9) -0.0019(7) 0.0064(7) -0.0023(7)
 C00O 0.0196(9) 0.0127(8) 0.0274(10) -0.0029(7) 0.0002(7) 0.0033(7)
 C00P 0.0182(9) 0.0204(9) 0.0383(12) -0.0019(8) 0.0030(8) -0.0033(7)
 C00Q 0.0217(9) 0.0248(10) 0.0217(9) -0.0021(8) -0.0036(7) -0.0013(8)
 C00R 0.0436(12) 0.0223(10) 0.0181(9) 0.0037(8) 0.0064(8) 0.0018(9)
 C00S 0.0201(9) 0.0223(10) 0.0287(10) 0.0010(8) 0.0072(8) -0.0014(7)
 C00T 0.0200(9) 0.0240(10) 0.0307(10) -0.0012(8) 0.0095(8) -0.0035(7)
 C00U 0.0160(9) 0.0274(10) 0.0341(11) -0.0027(9) -0.0008(8) -0.0025(8)
 C00V 0.0168(9) 0.0410(13) 0.0393(12) -0.0030(10) 0.0036(9) -0.0002(9)
 C00W 0.0284(11) 0.0291(11) 0.0384(12) 0.0014(9) 0.0023(9) 0.0112(9)
 C00X 0.0310(11) 0.0391(13) 0.0310(11) 0.0017(10) 0.0093(9) -0.0002(9)
 C00Y 0.0250(11) 0.0401(13) 0.0360(12) -0.0008(10) -0.0030(9) -0.0008(9)
 C00Z 0.0264(10) 0.0531(14) 0.0196(10) -0.0062(9) 0.0099(8) -0.0081(10)
 C010 0.0307(12) 0.0562(16) 0.0344(12) 0.0026(11) 0.0114(10) 0.0183(11)
 C011 0.0286(11) 0.0351(12) 0.0394(12) -0.0018(10) 0.0149(9) 0.0041(9)
 C012 0.0399(13) 0.0299(11) 0.0388(13) 0.0070(10) 0.0131(10) -0.0025(10)
 C013 0.0629(17) 0.0410(14) 0.0300(12) -0.0065(10) 0.0255(12) -0.0031(12)
 C014 0.0286(12) 0.0357(13) 0.0567(16) 0.0016(11) -0.0008(11) 0.0025(10)
 B015 0.0195(10) 0.0133(9) 0.0208(10) -0.0006(7) 0.0048(8) 0.0006(7)
 C016 0.0255(12) 0.0461(15) 0.074(2) 0.0108(14) -0.0016(12) -0.0093(11)
 C017 0.0337(13) 0.078(2) 0.0426(15) -0.0113(14) 0.0120(11) 0.0095(13)
 C018 0.0316(14) 0.095(3) 0.067(2) 0.047(2) 0.0154(13) -0.0008(15)
 C019 0.0511(18) 0.114(3) 0.0426(16) 0.0125(19) 0.0251(14) 0.0108(19)
 C01A 0.138(4) 0.094(3) 0.0237(13) 0.0186(15) 0.0275(17) 0.073(3)

_geom_special_details
;
 All esds (except the esd in the dihedral angle between two l.s. planes)
 are estimated using the full covariance matrix.  The cell esds are taken
 into account individually in the estimation of esds in distances, angles
 and torsion angles; correlations between esds in cell parameters are only
 used when they are defined by crystal symmetry.  An approximate (isotropic)
 treatment of cell esds is used for estimating esds involving l.s. planes.
;
loop_
  _geom_bond_atom_site_label_1
  _geom_bond_atom_site_label_2
  _geom_bond_distance
  _geom_bond_site_symmetry_2
  _geom_bond_publ_flag
 Cl01 B015 1.886(2) . ?
 S02 O003 1.5213(14) . ?
 S02 O009 1.4204(16) . ?
 S02 O00A 1.4167(17) . ?
 S02 C00W 1.837(2) . ?
 O003 B015 1.515(2) . ?
 F004 C00W 1.327(3) . ?
 F005 C00W 1.325(3) . ?
 F006 C00W 1.302(3) . ?
 N007 C00B 1.327(2) . ?
 N007 C00D 1.446(2) . ?
 N007 C00O 1.479(2) . ?
 N008 C00B 1.336(2) . ?
 N008 C00C 1.445(2) . ?
 N008 C00G 1.480(2) . ?
 C00B B015 1.621(3) . ?
 C00C C00F 1.402(3) . ?
 C00C C00H 1.405(3) . ?
 C00D C00E 1.398(3) . ?
 C00D C00N 1.406(3) . ?
 C00E C00J 1.518(3) . ?
 C00E C00Q 1.400(3) . ?
 C00F C00I 1.520(3) . ?
 C00F C00L 1.402(3) . ?
 C00G C00O 1.526(3) . ?
 C00H C00P 1.400(3) . ?
 C00H C00S 1.517(3) . ?
 C00I C00X 1.521(3) . ?
 C00I C010 1.537(3) . ?
 C00J C00K 1.538(3) . ?
 C00J C00R 1.532(3) . ?
 C00L C00M 1.381(3) . ?
 C00M C00P 1.383(3) . ?
 C00N C00T 1.392(3) . ?
 C00N C00Z 1.517(3) . ?
 C00Q C00U 1.376(3) . ?
 C00S C011 1.535(3) . ?
 C00S C012 1.535(3) . ?
 C00T C00U 1.383(3) . ?
 C00V C00Y 1.389(4) . ?
 C00V C014 1.498(4) . ?
 C00V C017 1.384(4) . ?
 C00Y C016 1.395(4) . ?
 C00Z C013 1.529(3) . ?
 C00Z C01A 1.512(4) . ?
 C016 C018 1.391(5) . ?
 C017 C019 1.371(5) . ?
 C018 C019 1.359(6) . ?

loop_
  _geom_angle_atom_site_label_1
  _geom_angle_atom_site_label_2
  _geom_angle_atom_site_label_3
  _geom_angle
  _geom_angle_site_symmetry_1
  _geom_angle_site_symmetry_3
  _geom_angle_publ_flag
 O003 S02 C00W 99.55(9) . . ?
 O009 S02 O003 112.89(9) . . ?
 O009 S02 C00W 106.41(11) . . ?
 O00A S02 O003 110.55(9) . . ?
 O00A S02 O009 120.31(11) . . ?
 O00A S02 C00W 104.51(12) . . ?
 B015 O003 S02 125.22(12) . . ?
 C00B N007 C00D 129.21(15) . . ?
 C00B N007 C00O 111.90(14) . . ?
 C00D N007 C00O 118.64(14) . . ?
 C00B N008 C00C 128.18(15) . . ?
 C00B N008 C00G 111.71(14) . . ?
 C00C N008 C00G 118.82(14) . . ?
 N007 C00B N008 110.15(15) . . ?
 N007 C00B B015 127.30(15) . . ?
 N008 C00B B015 121.92(15) . . ?
 C00F C00C N008 118.41(17) . . ?
 C00F C00C C00H 122.63(17) . . ?
 C00H C00C N008 118.67(17) . . ?
 C00E C00D N007 119.47(16) . . ?
 C00E C00D C00N 122.44(17) . . ?
 C00N C00D N007 117.75(16) . . ?
 C00D C00E C00J 122.74(16) . . ?
 C00D C00E C00Q 117.26(17) . . ?
 C00Q C00E C00J 119.96(17) . . ?
 C00C C00F C00I 123.00(17) . . ?
 C00L C00F C00C 117.44(18) . . ?
 C00L C00F C00I 119.55(18) . . ?
 N008 C00G C00O 102.49(14) . . ?
 C00C C00H C00S 122.58(17) . . ?
 C00P C00H C00C 117.30(19) . . ?
 C00P C00H C00S 120.12(18) . . ?
 C00F C00I C00X 111.91(17) . . ?
 C00F C00I C010 110.44(19) . . ?
 C00X C00I C010 111.07(18) . . ?
 C00E C00J C00K 110.09(16) . . ?
 C00E C00J C00R 111.75(16) . . ?
 C00R C00J C00K 110.24(16) . . ?
 C00M C00L C00F 121.1(2) . . ?
 C00L C00M C00P 120.36(19) . . ?
 C00D C00N C00Z 122.44(17) . . ?
 C00T C00N C00D 117.74(18) . . ?
 C00T C00N C00Z 119.77(18) . . ?
 N007 C00O C00G 102.63(14) . . ?
 C00M C00P C00H 121.2(2) . . ?
 C00U C00Q C00E 121.28(18) . . ?
 C00H C00S C011 111.07(17) . . ?
 C00H C00S C012 111.35(17) . . ?
 C012 C00S C011 110.25(18) . . ?
 C00U C00T C00N 120.84(19) . . ?
 C00Q C00U C00T 120.43(18) . . ?
 C00Y C00V C014 121.2(2) . . ?
 C017 C00V C00Y 118.5(3) . . ?
 C017 C00V C014 120.3(3) . . ?
 F004 C00W S02 109.10(17) . . ?
 F005 C00W S02 110.60(16) . . ?
 F005 C00W F004 107.5(2) . . ?
 F006 C00W S02 111.79(17) . . ?
 F006 C00W F004 109.3(2) . . ?
 F006 C00W F005 108.5(2) . . ?
 C00V C00Y C016 120.8(3) . . ?
 C00N C00Z C013 112.6(2) . . ?
 C01A C00Z C00N 111.0(2) . . ?
 C01A C00Z C013 110.6(2) . . ?
 O003 B015 Cl01 109.90(13) . . ?
 O003 B015 C00B 107.64(15) . . ?
 C00B B015 Cl01 102.91(12) . . ?
 C018 C016 C00Y 118.7(3) . . ?
 C019 C017 C00V 120.8(3) . . ?
 C019 C018 C016 120.4(3) . . ?
 C018 C019 C017 120.7(3) . . ?

_shelx_res_file
;
TITL mo_Gk_5221_0m_a.res in P2(1)/n
    mo_gk_5221_0m_a.res
    created by SHELXL-2016/6 at 16:47:04 on 08-Feb-2021
REM Old TITL Integration of Gk_5221
REM SHELXT solution in P2(1)/n
REM R1 0.150, Rweak 0.007, Alpha 0.035, Orientation as input
REM Formula found by SHELXT: C36 Cl2 N3 O5
CELL 0.71073 12.2865 14.7315 20.6444 90 104.789 90
ZERR 4 0.0026 0.0029 0.0041 0 0.009 0
LATT 1
SYMM 0.5-X,0.5+Y,0.5-Z
SFAC C H B Cl F N O S
UNIT 140 188 4 4 12 8 12 4

L.S. 10
PLAN  20
SIZE 0.09 0.12 0.15
TEMP -173.15
LIST 6
fmap 2
acta
OMIT -3 53
REM <olex2.extras>
REM <HklSrc "%.\\mo_Gk_5221_0m_a.hkl">
REM </olex2.extras>

WGHT    0.087400    3.582600
FVAR       0.49925
CL01  4    0.300580    0.282886    0.793311    11.00000    0.03479    0.01630 =
         0.02744    0.00190    0.01592   -0.00071
PART 1
S02   8    0.508367    0.214502    0.709764    11.00000    0.02587    0.01962 =
         0.02956    0.00074    0.01165    0.00652
PART 0
O003  7    0.438911    0.300786    0.705704    11.00000    0.01908    0.01718 =
         0.03016    0.00307    0.00768    0.00369
F004  5    0.689805    0.169255    0.799353    11.00000    0.03565    0.04179 =
         0.06538    0.00602    0.00125    0.02459
F005  5    0.574471    0.247662    0.838345    11.00000    0.04833    0.08507 =
         0.03003   -0.00177    0.00336    0.02600
F006  5    0.673797    0.312435    0.780894    11.00000    0.03584    0.03932 =
         0.07865    0.00295   -0.00907   -0.00471
N007  6    0.330183    0.483173    0.717851    11.00000    0.01492    0.01125 =
         0.01556   -0.00096    0.00286    0.00103
N008  6    0.168800    0.429922    0.659867    11.00000    0.01523    0.01169 =
         0.01934   -0.00235    0.00140    0.00168
O009  7    0.450649    0.136096    0.723364    11.00000    0.03472    0.01637 =
         0.04928    0.00188    0.01623    0.00545
O00A  7    0.565733    0.213018    0.658327    11.00000    0.04552    0.03853 =
         0.04280    0.00164    0.02568    0.01406
C00B  1    0.274417    0.408864    0.692361    11.00000    0.01580    0.01445 =
         0.01234   -0.00113    0.00481   -0.00080
C00C  1    0.085555    0.372681    0.616572    11.00000    0.01440    0.01381 =
         0.02273   -0.00380   -0.00053    0.00115
C00D  1    0.449302    0.495003    0.747627    11.00000    0.01458    0.01114 =
         0.01704   -0.00085    0.00231   -0.00092
C00E  1    0.488052    0.505490    0.817012    11.00000    0.01913    0.01262 =
         0.01797    0.00035    0.00260    0.00072
C00F  1    0.092455    0.359095    0.550516    11.00000    0.01615    0.01929 =
         0.02489   -0.00479    0.00038    0.00288
C00G  1    0.148843    0.529027    0.659497    11.00000    0.01922    0.01314 =
         0.02250   -0.00179    0.00160    0.00285
AFIX  23
H00A  2    0.082083    0.543588    0.676111    11.00000   -1.20000
H00B  2    0.138466    0.554699    0.614007    11.00000   -1.20000
AFIX   0
C00H  1   -0.004710    0.340279    0.640268    11.00000    0.01676    0.01560 =
         0.02878   -0.00131    0.00197    0.00160
C00I  1    0.189791    0.393795    0.524459    11.00000    0.01912    0.03660 =
         0.02115   -0.00747    0.00301    0.00039
AFIX  13
H00I  2    0.238504    0.432206    0.560310    11.00000   -1.20000
AFIX   0
C00J  1    0.411339    0.497878    0.863896    11.00000    0.02655    0.01688 =
         0.01456   -0.00069    0.00495   -0.00043
AFIX  13
H00J  2    0.335875    0.476557    0.837293    11.00000   -1.20000
AFIX   0
C00K  1    0.396509    0.591438    0.893533    11.00000    0.03388    0.01945 =
         0.02195   -0.00345    0.00803    0.00117
AFIX 137
H00C  2    0.469556    0.613234    0.920274    11.00000   -1.50000
H00D  2    0.344177    0.586339    0.922098    11.00000   -1.50000
H00E  2    0.366342    0.634375    0.857117    11.00000   -1.50000
AFIX   0
C00L  1    0.005117    0.310426    0.507621    11.00000    0.02345    0.02468 =
         0.02537   -0.00885   -0.00177    0.00204
AFIX  43
H00L  2    0.008118    0.299009    0.462820    11.00000   -1.20000
AFIX   0
C00M  1   -0.085259    0.278794    0.529442    11.00000    0.02091    0.02204 =
         0.03713   -0.00838   -0.00374   -0.00214
AFIX  43
H00M  2   -0.144327    0.246916    0.499377    11.00000   -1.20000
AFIX   0
C00N  1    0.520090    0.505024    0.704282    11.00000    0.02009    0.01927 =
         0.02084   -0.00187    0.00643   -0.00226
C00O  1    0.256689    0.564203    0.707187    11.00000    0.01957    0.01272 =
         0.02737   -0.00291    0.00019    0.00330
AFIX  23
H00F  2    0.289956    0.614300    0.686643    11.00000   -1.20000
H00G  2    0.242695    0.585571    0.749809    11.00000   -1.20000
AFIX   0
C00P  1   -0.090213    0.293281    0.594823    11.00000    0.01823    0.02035 =
         0.03828   -0.00190    0.00298   -0.00326
AFIX  43
H00P  2   -0.152763    0.270938    0.609151    11.00000   -1.20000
AFIX   0
C00Q  1    0.601936    0.527052    0.842614    11.00000    0.02173    0.02480 =
         0.02173   -0.00206   -0.00361   -0.00133
AFIX  43
H00Q  2    0.630857    0.534941    0.889539    11.00000   -1.20000
AFIX   0
C00R  1    0.456171    0.429264    0.920160    11.00000    0.04363    0.02230 =
         0.01814    0.00365    0.00642    0.00179
AFIX 137
H00H  2    0.466888    0.370314    0.900671    11.00000   -1.50000
H00K  2    0.402000    0.422900    0.947443    11.00000   -1.50000
H00N  2    0.528299    0.450690    0.948351    11.00000   -1.50000
AFIX   0
C00S  1   -0.012036    0.354980    0.711784    11.00000    0.02011    0.02235 =
         0.02873    0.00100    0.00716   -0.00142
AFIX  13
H00S  2    0.060030    0.383445    0.737363    11.00000   -1.20000
AFIX   0
C00T  1    0.632754    0.525605    0.732648    11.00000    0.01998    0.02397 =
         0.03072   -0.00118    0.00945   -0.00354
AFIX  43
H00T  2    0.682786    0.531878    0.704631    11.00000   -1.20000
AFIX   0
C00U  1    0.672798    0.537042    0.801112    11.00000    0.01605    0.02740 =
         0.03407   -0.00274   -0.00082   -0.00254
AFIX  43
H00U  2    0.749713    0.551888    0.819613    11.00000   -1.20000
AFIX   0

C00V  1    0.641662   -0.001358    0.503840    11.00000    0.01682    0.04100 =
         0.03935   -0.00297    0.00361   -0.00021
C00W  1    0.618656    0.238613    0.786474    11.00000    0.02844    0.02913 =
         0.03837    0.00145    0.00229    0.01122
C00X  1    0.149467    0.452715    0.462456    11.00000    0.03099    0.03908 =
         0.03101    0.00173    0.00932   -0.00019
AFIX 137
H00O  2    0.103631    0.416090    0.425917    11.00000   -1.50000
H00R  2    0.214626    0.477036    0.448980    11.00000   -1.50000
H00V  2    0.104164    0.502980    0.472524    11.00000   -1.50000
AFIX   0

C00Y  1    0.642820    0.086971    0.527487    11.00000    0.02505    0.04007 =
         0.03602   -0.00083   -0.00296   -0.00084
AFIX  43
H00Y  2    0.644571    0.097260    0.573170    11.00000   -1.20000
AFIX   0

C00Z  1    0.476972    0.497879    0.628770    11.00000    0.02641    0.05314 =
         0.01959   -0.00624    0.00994   -0.00808
AFIX  13
H00Z  2    0.403212    0.465236    0.619088    11.00000   -1.20000
AFIX   0
C010  1    0.261636    0.314158    0.510748    11.00000    0.03072    0.05623 =
         0.03437    0.00256    0.01142    0.01829
AFIX 137
H01A  2    0.286052    0.277066    0.551274    11.00000   -1.50000
H01B  2    0.327787    0.337765    0.497980    11.00000   -1.50000
H01C  2    0.216868    0.276873    0.474249    11.00000   -1.50000
AFIX   0
C011  1   -0.108649    0.419889    0.714251    11.00000    0.02865    0.03513 =
         0.03935   -0.00184    0.01492    0.00414
AFIX 137
H01D  2   -0.098876    0.477143    0.692228    11.00000   -1.50000
H01E  2   -0.108160    0.431734    0.761036    11.00000   -1.50000
H01F  2   -0.180584    0.392224    0.691063    11.00000   -1.50000
AFIX   0
C012  1   -0.026080    0.264709    0.745878    11.00000    0.03992    0.02990 =
         0.03882    0.00700    0.01306   -0.00253
AFIX 137
H01G  2   -0.096863    0.235924    0.721989    11.00000   -1.50000
H01H  2   -0.027364    0.276102    0.792446    11.00000   -1.50000
H01I  2    0.037020    0.224460    0.744968    11.00000   -1.50000
AFIX   0
C013  1    0.555511    0.443142    0.596955    11.00000    0.06290    0.04095 =
         0.03002   -0.00648    0.02554   -0.00312
AFIX 137
H01J  2    0.624367    0.477999    0.599360    11.00000   -1.50000
H01K  2    0.517748    0.430611    0.549971    11.00000   -1.50000
H01L  2    0.574775    0.385723    0.621135    11.00000   -1.50000
AFIX   0

C014  1    0.645710   -0.081049    0.549478    11.00000    0.02859    0.03566 =
         0.05666    0.00157   -0.00079    0.00246
AFIX 137
H01P  2    0.724243   -0.095013    0.571989    11.00000   -1.50000
H01Q  2    0.610941   -0.133746    0.523240    11.00000   -1.50000
H01R  2    0.604593   -0.066517    0.583057    11.00000   -1.50000
AFIX   0

B015  3    0.315794    0.304540    0.706015    11.00000    0.01951    0.01328 =
         0.02080   -0.00055    0.00482    0.00056
AFIX  13
H015  2    0.268860    0.261985    0.672526    11.00000   -1.20000
AFIX   0

C016  1    0.641443    0.160792    0.484941    11.00000    0.02551    0.04606 =
         0.07434    0.01081   -0.00162   -0.00931
AFIX  43
H016  2    0.641712    0.221174    0.501137    11.00000   -1.20000
AFIX   0
C017  1    0.635708   -0.014566    0.436634    11.00000    0.03371    0.07786 =
         0.04258   -0.01132    0.01200    0.00948
AFIX  43
H017  2    0.632925   -0.074554    0.419398    11.00000   -1.20000
AFIX   0
C018  1    0.639669    0.144229    0.418320    11.00000    0.03162    0.09485 =
         0.06668    0.04739    0.01536   -0.00078
AFIX  43
H018  2    0.642595    0.193618    0.389224    11.00000   -1.20000
AFIX   0
C019  1    0.633777    0.057844    0.394642    11.00000    0.05111    0.11407 =
         0.04257    0.01253    0.02511    0.01077
AFIX  43
H019  2    0.628260    0.047502    0.348493    11.00000   -1.20000
AFIX   0

C01A  1    0.455444    0.590890    0.597119    11.00000    0.13752    0.09366 =
         0.02366    0.01857    0.02749    0.07322
AFIX 137
H01M  2    0.402500    0.623991    0.616778    11.00000   -1.50000
H01N  2    0.423382    0.584468    0.548750    11.00000   -1.50000
H01O  2    0.526495    0.624496    0.605314    11.00000   -1.50000
AFIX   0
HKLF 4


REM  mo_Gk_5221_0m_a.res in P2(1)/n
REM R1 =  0.0541 for    7054 Fo > 4sig(Fo)  and  0.0580 for all    7489 data
REM    424 parameters refined using      0 restraints

END

WGHT      0.0874      3.5826

REM Highest difference peak  1.347,  deepest hole -0.845,  1-sigma level  0.202
Q1    1   0.4874  0.2148  0.7735  11.00000  0.05    1.35
Q2    1   0.3524  0.2649  0.6092  11.00000  0.05    0.97
Q3    1   0.5549 -0.0979  0.5511  11.00000  0.05    0.66
Q4    1   0.1376  0.3791  0.5365  11.00000  0.05    0.62
Q5    1   0.0394  0.3381  0.5250  11.00000  0.05    0.59
Q6    1   0.5148  0.1678  0.4842  11.00000  0.05    0.57
Q7    1  -0.0375  0.2893  0.5228  11.00000  0.05    0.56
Q8    1   0.1799  0.4217  0.4970  11.00000  0.05    0.56
Q9    1   0.2191  0.3539  0.5185  11.00000  0.05    0.53
Q10   1   0.5082  0.6027  0.5968  11.00000  0.05    0.52
Q11   1   0.4807  0.2101  0.8412  11.00000  0.05    0.49
Q12   1   0.1601  0.5145  0.4872  11.00000  0.05    0.49
Q13   1   0.2265  0.3536  0.4595  11.00000  0.05    0.47
Q14   1   0.6141  0.1831  0.4458  11.00000  0.05    0.47
Q15   1   0.4298  0.5691  0.5707  11.00000  0.05    0.46
Q16   1  -0.0971  0.2951  0.5527  11.00000  0.05    0.43
Q17   1   0.6627 -0.0682  0.5220  11.00000  0.05    0.42
Q18   1   0.0802  0.3745  0.5756  11.00000  0.05    0.42
Q19   1   0.4544  0.5412  0.5999  11.00000  0.05    0.41
Q20   1   0.6064  0.1411  0.5063  11.00000  0.05    0.41
;
_shelx_res_checksum                16734
_shelx_hkl_file
;
  -2   0   0 6170.89  390.29
  -2   0   0 6330.76  389.98
  -3   0   0    2.44    0.66
   3   0   0    2.86    0.63
   3   0   0    2.63    0.73
   3   0   0    1.83    0.61
   4   0   0 1242.14   71.76
   4   0   0 1150.08   71.80
   4   0   0 1093.89   71.88
  -4   0   0 1127.77   71.79
  -5   0   0    4.22    0.91
  -5   0   0    2.29    0.83
  -5   0   0    1.72    0.73
   5   0   0    3.14    0.85
   5   0   0    3.48    1.02
   5   0   0    1.51    0.70
  -6   0   0 2035.15  134.38
   6   0   0 2271.22  134.62
   6   0   0 2219.48  134.42
   6   0   0 2215.41  134.22
  -6   0   0 2129.62  134.31
  -6   0   0 2109.78  134.41
  -7   0   0    4.07    1.40
  -7   0   0    1.98    1.09
   7   0   0    3.13    0.95
   7   0   0    2.99    1.16
  -7   0   0    4.95    1.26
   7   0   0    4.81    1.50
   8   0   0    4.74    1.46
   8   0   0    4.02    1.20
   8   0   0    6.98    1.74
  -8   0   0    3.86    1.29
  -8   0   0    3.68    1.61
  -8   0   0    5.21    1.53
   9   0   0    0.69    1.11
   9   0   0    0.99    1.31
  -9   0   0    0.65    0.96
   9   0   0    1.39    0.89
  -9   0   0   -0.07    1.09
  10   0   0  120.15    9.65
  10   0   0  136.35    9.37
  10   0   0  131.54    9.89
 -10   0   0  136.51   10.06
 -10   0   0  127.04    9.94
  11   0   0    2.25    1.42
  11   0   0    2.68    1.76
 -11   0   0   -0.12    1.39
 -12   0   0  357.58   25.13
  12   0   0  382.48   24.94
  12   0   0  367.65   24.93
  13   0   0   -0.59    1.61
 -13   0   0    2.88    2.80
  13   0   0    1.80    1.74
 -14   0   0  102.07    8.85
 -14   0   0  102.29    8.93
  14   0   0  103.00    8.56
  14   0   0   91.24    8.49
  15   0   0    2.32    1.98
 -15   0   0   -0.95    1.99
 -15   0   0    3.75    2.27
  15   0   0   -0.16    1.90
  16   0   0   39.42    4.94
 -16   0   0   27.76    4.98
  16   0   0   37.02    4.98
 -16   0   0   42.23    5.58
  -1   1   0    8.14    0.74
  -2  -1   0  940.45   60.49
  -2  -1   0  934.02   60.49
   2  -1   0  987.54   60.71
  -2  -1   0  995.08   60.64
  -2   1   0  990.03   60.71
  -2   1   0  970.97   60.67
   2   1   0 1041.33   60.52
   2   1   0  963.01   60.65
   3  -1   0 4133.71  249.72
   3  -1   0 4273.21  249.20
  -3  -1   0 3629.12  246.10
  -3  -1   0 3593.44  246.61
   4  -1   0    1.55    0.65
  -4  -1   0    1.58    0.64
  -4  -1   0    1.21    0.64
   4  -1   0    0.70    0.69
   4  -1   0    4.09    0.93
  -4  -1   0    0.82    0.51
   4   1   0    1.93    0.56
  -4   1   0    3.75    0.90
  -4   1   0    2.96    0.85
   4   1   0    1.17    0.62
   5  -1   0  519.68   33.21
   5  -1   0  530.77   33.38
   5  -1   0  549.75   33.14
  -5  -1   0  518.24   32.94
  -5  -1   0  538.78   33.16
  -5  -1   0  500.71   33.01
  -5   1   0  503.93   33.14
  -5   1   0  496.35   33.15
   5   1   0  544.55   32.84
   5   1   0  533.62   33.16
   5   1   0  517.18   32.99
  -6  -1   0  750.56   50.66
   6  -1   0  843.32   50.67
  -6  -1   0  787.36   50.51
  -6  -1   0  739.62   50.58
   6  -1   0  870.76   51.09
   6  -1   0  872.00   50.90
   6   1   0  794.92   50.71
  -6   1   0  774.03   50.76
   6   1   0  797.08   50.57
  -6   1   0  825.42   50.78
   6   1   0  809.98   50.36
   7  -1   0 1109.83   72.25
  -7  -1   0 1200.34   72.46
   7  -1   0 1021.62   72.35
   7  -1   0 1134.62   72.66
  -7  -1   0 1246.66   72.28
  -7  -1   0 1176.15   72.49
   7   1   0 1237.59   72.05
   7   1   0 1225.84   72.50
   7   1   0 1201.29   72.32
  -7   1   0 1009.93   72.38
  -7   1   0 1138.22   72.40
  -8  -1   0  144.72    9.95
  -8  -1   0  141.91   10.20
  -8  -1   0  130.87   10.07
   8  -1   0  157.86   10.63
   8  -1   0  149.95   10.52
   8  -1   0  144.42   10.30
   8   1   0  131.51   10.10
  -8   1   0  159.30   10.38
  -8   1   0  138.71   10.31
   8   1   0  138.27    9.69
   8   1   0  136.39   10.00
   9  -1   0    1.62    1.34
  -9  -1   0    6.74    1.83
  -9  -1   0    5.32    1.39
   9   1   0    4.71    1.49
  -9   1   0    2.39    1.25
   9   1   0    4.27    1.59
   9   1   0    6.86    1.37
  10  -1   0   23.74    3.08
  10  -1   0   21.31    3.08
 -10  -1   0   20.89    2.72
 -10  -1   0   23.59    3.16
  10   1   0   18.58    2.86
  10   1   0   17.80    2.35
  10   1   0   20.20    2.79
 -10   1   0   22.20    3.22
 -11  -1   0    5.08    2.07
  11  -1   0   14.02    2.89
 -11   1   0    9.89    2.44
  11   1   0    5.11    1.84
  11   1   0    5.65    1.64
  11   1   0    8.35    2.07
  12  -1   0    0.00    1.54
  12  -1   0   -0.09    1.51
 -12  -1   0    1.17    1.63
 -12   1   0    0.28    1.59
  12   1   0    1.57    1.60
 -12   1   0    0.49    1.76
  12   1   0   -0.01    1.40
 -13  -1   0  114.22    9.66
  13  -1   0   80.94    8.09
  13  -1   0   97.59    8.51
  13   1   0  114.33    8.44
 -13   1   0   89.51    8.47
  13   1   0  117.73    8.47
 -13   1   0   84.55    8.48
  14  -1   0   31.08    5.40
 -14  -1   0   36.81    4.89
  14  -1   0   30.00    4.42
 -14   1   0   21.56    4.26
 -14   1   0   28.09    4.37
  14   1   0   39.23    4.31
  14   1   0   37.82    4.39
  15  -1   0  134.66   10.73
 -15  -1   0  120.91   10.93
 -15  -1   0  133.12   10.97
  15  -1   0  136.84   10.94
  15   1   0  131.12   10.25
 -15   1   0  121.74   10.83
 -15   1   0  129.14   11.21
 -16  -1   0    6.95    2.69
 -16  -1   0    8.46    3.09
  16  -1   0    9.86    2.87
  16  -1   0    3.82    2.61
  16   1   0    3.78    2.14
 -16   1   0    9.00    3.09
  16   1   0    4.72    3.35
 -16   1   0    9.84    3.19
   0  -2   0  235.91   13.69
   0  -2   0  201.72   13.67
   1  -2   0 4580.46  298.65
  -1  -2   0 4745.33  294.61
   1  -2   0 4914.59  298.55
   2  -2   0  331.76   20.97
  -2  -2   0  337.79   20.80
   2  -2   0  357.49   20.91
  -2  -2   0  318.44   20.59
   2  -2   0  347.51   20.90
   2  -2   0  333.69   21.03
  -2  -2   0  298.58   20.52
  -2  -2   0  326.92   20.74
  -2   2   0  354.38   20.99
   2   2   0  308.43   20.56
   2   2   0  327.99   20.80
   2   2   0  356.54   20.64
   2   2   0  310.67   20.55
  -2   2   0  331.49   20.87
  -3  -2   0  301.30   17.53
   3  -2   0  241.06   17.81
  -3  -2   0  301.14   17.75
   3  -2   0  276.19   17.83
   3  -2   0  244.46   17.89
  -3  -2   0  299.63   17.48
   3   2   0  319.92   17.46
  -3   2   0  281.37   17.91
   3   2   0  300.42   17.81
  -3   2   0  246.13   17.74
  -3   2   0  248.93   17.74
   4  -2   0 3290.04  209.74
   4  -2   0 3226.51  209.85
  -4  -2   0 3530.78  209.33
  -4   2   0 3258.58  209.65
  -4   2   0 3299.52  209.67
  -4   2   0 3725.99  209.82
   5  -2   0  468.32   30.00
   5  -2   0  433.48   30.18
  -5  -2   0  503.69   29.71
   5  -2   0  462.45   30.11
  -5  -2   0  465.78   29.76
  -5  -2   0  489.08   29.95
  -5   2   0  455.17   30.04
   5   2   0  501.63   29.75
  -5   2   0  402.43   29.92
   5   2   0  506.05   29.74
   5   2   0  492.96   29.85
   6  -2   0  154.44   11.07
  -6  -2   0  156.55   10.70
  -6  -2   0  168.26   10.68
   6  -2   0  148.97   10.70
   6  -2   0  152.63   10.88
  -6  -2   0  164.35   10.45
  -6   2   0  130.24   10.69
   6   2   0  165.75   10.51
  -6   2   0  145.27   10.78
   6   2   0  169.68   10.67
   6   2   0  166.53   10.29
  -7  -2   0  152.73   10.28
   7  -2   0  144.79   10.56
   7  -2   0  129.94   10.26
  -7  -2   0  159.89    9.93
  -7  -2   0  161.12   10.22
   7  -2   0  132.62   10.14
   7   2   0  154.17    9.72
   7   2   0  148.79    9.98
   7   2   0  151.56   10.12
  -7   2   0  138.17   10.26
  -7   2   0  127.00   10.23
  -8  -2   0  515.81   32.62
  -8  -2   0  500.94   32.95
   8  -2   0  487.37   33.30
   8  -2   0  525.53   32.96
  -8  -2   0  535.75   33.01
   8   2   0  499.68   32.81
  -8   2   0  528.14   33.13
   8   2   0  530.01   32.76
   8   2   0  503.17   32.37
  -8   2   0  497.14   33.16
   9  -2   0  113.14    8.79
  -9  -2   0  128.02    8.80
   9  -2   0  114.75    8.52
  -9  -2   0  125.40    8.29
   9  -2   0   95.05    8.70
   9   2   0  122.44    8.01
   9   2   0  119.47    8.48
   9   2   0  119.06    8.39
  -9   2   0  122.63   10.71
  -9   2   0  102.28    8.68
  -9   2   0   93.43    8.59
  10  -2   0 1093.57   67.25
  10  -2   0 1127.44   67.10
 -10  -2   0 1062.42   66.28
 -10  -2   0 1060.59   66.83
 -10   2   0 1049.45   66.95
  10   2   0 1037.71   65.95
 -10   2   0 1062.84   67.04
  10   2   0  998.69   66.90
  10   2   0  997.25   66.35
 -11  -2   0    0.54    1.12
 -11  -2   0    1.34    1.62
  11  -2   0    0.52    1.38
  11  -2   0   -0.27    1.39
 -11   2   0    0.10    1.54
  11   2   0    0.98    1.32
  11   2   0    1.71    1.04
  11   2   0    1.16    1.25
 -11   2   0   -0.91    1.46
  12  -2   0   29.30    3.87
 -12  -2   0   26.53    3.82
  12  -2   0   32.54    4.08
 -12   2   0   26.52    3.79
 -12   2   0   31.45    4.10
  12   2   0   20.75    2.73
  12   2   0   21.93    3.19
  12   2   0   24.82    3.37
  13  -2   0   10.81    2.90
 -13  -2   0   14.66    3.10
  13  -2   0    9.05    2.80
 -13   2   0    5.54    2.36
 -13   2   0   10.14    2.98
  13   2   0   10.26    2.43
  13   2   0   19.17    2.90
  14  -2   0   66.35    6.54
 -14  -2   0   63.25    6.63
  14  -2   0   65.70    6.85
 -14   2   0   67.82    6.80
 -14   2   0   61.52    6.60
  14   2   0   60.59    5.69
  14   2   0   56.20    5.83
  15  -2   0    6.93    2.67
 -15  -2   0    1.24    2.00
  15  -2   0    8.15    2.84
 -15   2   0    6.35    2.68
 -15   2   0    7.20    2.77
  15   2   0    2.59    1.75
  15   2   0    3.22    1.98
 -16  -2   0  120.24   10.62
 -16  -2   0  118.61   10.61
  16  -2   0  135.80   10.76
  16  -2   0  108.65   10.21
 -16   2   0  112.98   10.48
  16   2   0  113.20    9.78
 -16   2   0  136.91   11.86
   0  -3   0    1.28    0.38
   0  -3   0    1.01    0.38
   0  -3   0    1.76    0.42
   0  -3   0    1.67    0.47
   0   3   0    2.59    0.50
   0   3   0    1.83    0.42
   0   3   0    2.05    0.53
  -2  -3   0  349.63   23.07
  -2  -3   0  341.83   23.04
  -2  -3   0  316.16   22.83
   2  -3   0  390.32   23.39
   2  -3   0  400.84   23.21
   2  -3   0  392.36   23.22
   2   3   0  349.61   23.04
  -2   3   0  382.38   23.19
  -2   3   0  358.00   23.20
   2   3   0  348.58   23.01
  -2   3   0  416.28   23.35
   3  -3   0 5849.90  360.21
   3  -3   0 5080.84  361.99
  -3  -3   0 6061.87  354.99
   3  -3   0 5228.94  363.33
  -3  -3   0 6112.92  355.46
   4  -3   0  484.56   32.16
  -4  -3   0  492.36   31.87
  -4  -3   0  506.51   31.51
   4  -3   0  484.62   32.28
   4  -3   0  545.75   32.15
  -4  -3   0  466.57   31.60
   4   3   0  517.89   31.64
  -4   3   0  550.76   32.24
  -4   3   0  492.36   32.04
  -4   3   0  480.08   32.01
   4   3   0  556.50   31.74
   4   3   0  502.38   31.50
   4   3   0  500.19   31.99
   5  -3   0  160.46   11.64
   5  -3   0  166.70   11.57
  -5  -3   0  176.03   11.44
   5  -3   0  156.79   11.77
  -5  -3   0  179.51   11.04
  -5  -3   0  179.16   11.20
   5   3   0  178.94   11.10
  -5   3   0  168.09   11.66
   5   3   0  195.07   11.69
  -5   3   0  143.75   11.44
   5   3   0  188.48   10.99
   5   3   0  177.37   11.18
  -5   3   0  149.53   11.47
   6  -3   0  102.18    7.18
   6  -3   0  101.47    7.31
   6  -3   0  100.26    7.48
  -6  -3   0   91.47    6.93
  -6  -3   0   99.95    6.83
  -6  -3   0   95.29    6.55
   6   3   0   94.28    6.72
  -6   3   0   98.26    7.22
  -6   3   0   95.15    7.14
  -6   3   0   88.22    7.07
   6   3   0   96.50    6.65
  -7  -3   0  249.26   15.36
  -7  -3   0  232.13   15.86
   7  -3   0  240.07   15.80
   7  -3   0  244.18   16.03
  -7  -3   0  237.62   14.99
  -7   3   0  248.18   17.45
   7   3   0  230.86   14.82
   7   3   0  218.71   15.10
   7   3   0  235.67   15.09
  -7   3   0  203.05   15.55
  -7   3   0  205.67   15.48
  -8  -3   0   88.99    6.17
  -8  -3   0   87.25    6.59
   8  -3   0   75.20    6.76
  -8  -3   0   95.80    6.65
   8  -3   0   86.00    6.73
   8  -3   0   78.61    6.98
   8   3   0   86.03    6.32
  -8   3   0   78.05    6.71
   8   3   0   85.94    5.96
   8   3   0   91.30    6.32
  -8   3   0   87.65    6.82
  -8   3   0   78.81    6.77
  -9  -3   0  265.75   17.69
   9  -3   0  257.79   18.05
   9  -3   0  259.33   18.26
  -9  -3   0  274.57   17.22
   9   3   0  261.84   16.93
   9   3   0  269.80   17.39
  -9   3   0  251.94   17.89
  -9   3   0  260.37   18.00
   9   3   0  253.95   17.28
 -10  -3   0  134.57    9.63
  10  -3   0  128.59   10.03
 -10  -3   0  126.72    8.91
  10  -3   0  122.45    9.75
  10   3   0  122.11    9.07
  10   3   0  125.12    8.65
 -10   3   0  129.07    9.86
 -10   3   0  117.72    9.60
  10   3   0  125.29    9.08
 -11  -3   0  438.07   29.09
  11  -3   0  483.31   30.29
  11  -3   0  485.97   30.51
 -11  -3   0  447.05   29.86
  11   3   0  448.41   28.82
 -11   3   0  459.26   30.22
  11   3   0  458.56   30.86
  11   3   0  393.69   29.22
 -11   3   0  463.56   30.18
 -12  -3   0    4.46    2.00
  12  -3   0    9.25    2.76
  12  -3   0    6.97    2.50
  12   3   0    5.10    1.80
 -12   3   0    4.96    2.27
  12   3   0    4.90    1.68
  12   3   0    6.01    1.65
 -12   3   0    4.57    1.99
  13  -3   0   61.80    6.28
  13  -3   0   51.70    6.05
 -13  -3   0   60.82    6.02
  13   3   0   61.66    5.43
  13   3   0   61.14    4.80
 -13   3   0   48.07    5.84
  13   3   0   61.22    5.21
 -13   3   0   50.47    5.95
  14  -3   0    7.42    2.75
  14  -3   0   10.78    2.99
 -14  -3   0   11.23    2.98
  14   3   0   12.64    2.52
 -14   3   0    8.12    2.75
  14   3   0   11.81    2.33
 -14   3   0    6.96    2.97
  14   3   0   11.94    2.86
  15  -3   0    1.71    2.14
  15  -3   0    1.07    2.16
 -15  -3   0    0.85    1.99
  15   3   0   -0.02    1.09
 -15   3   0   -1.01    2.16
  15   3   0    0.99    1.67
 -15   3   0   -0.69    1.82
  16  -3   0   17.35    3.97
  16  -3   0   20.99    4.13
 -16  -3   0    8.29    3.31
 -16   3   0   14.27    4.31
 -16   3   0   12.39    5.55
   0  -4   0 7657.12  502.35
   0  -4   0 7470.26  502.81
   0   4   0 8805.85  504.67
   0   4   0 8346.60  503.65
   1  -4   0  747.20   46.51
  -1  -4   0  720.18   46.48
   1  -4   0  744.90   46.60
   1  -4   0  776.04   46.67
  -1  -4   0  702.51   46.22
  -1  -4   0  691.88   46.28
   1  -4   0  775.17   46.62
  -1  -4   0  728.54   46.58
  -1   4   0  806.03   46.63
   1   4   0  747.39   46.60
   1   4   0  740.80   46.46
   1   4   0  803.95   46.27
  -1   4   0  713.85   46.63
  -1   4   0  750.29   46.49
  -1   4   0  753.39   46.51
   2  -4   0  868.41   51.60
  -2  -4   0  815.06   51.55
  -2  -4   0  823.06   51.48
  -2  -4   0  797.86   51.22
   2  -4   0  848.86   51.62
   2  -4   0  798.49   51.69
   2  -4   0  798.13   51.75
  -2   4   0  816.05   51.57
  -2   4   0  895.40   51.75
  -2   4   0  813.20   51.66
   2   4   0  837.36   51.49
   2   4   0  810.24   51.44
   3  -4   0    5.93    1.09
   3  -4   0    6.68    1.13
   3  -4   0    8.57    1.45
  -3  -4   0    3.29    0.84
   3  -4   0    5.52    1.20
  -3   4   0    3.61    0.95
  -3   4   0    8.69    1.19
  -3   4   0    7.67    1.32
  -4  -4   0    9.39    1.25
  -4  -4   0   11.25    1.10
   4  -4   0    6.51    1.53
   4  -4   0    8.75    1.59
  -4  -4   0   10.90    1.37
  -4  -4   0   11.25    0.85
   4  -4   0    9.14    1.40
   4   4   0   12.62    1.51
  -4   4   0    6.42    1.28
   4   4   0   10.15    0.89
   4   4   0   11.66    0.86
   4   4   0   10.00    0.86
  -4   4   0    6.64    1.35
  -4   4   0    7.33    1.39
  -5  -4   0  971.43   63.88
   5  -4   0 1020.69   64.43
   5  -4   0 1100.93   64.36
   5  -4   0 1009.67   64.58
  -5  -4   0 1009.02   64.02
  -5  -4   0 1046.75   63.47
  -5  -4   0 1081.47   63.73
   5   4   0 1076.54   64.23
   5   4   0 1032.26   63.47
  -5   4   0 1020.84   64.27
   5   4   0  930.75   63.50
  -5   4   0 1091.19   64.46
   5   4   0  908.67   63.49
  -5   4   0 1047.49   64.26
  -6  -4   0  186.41   12.57
   6  -4   0  224.14   13.48
   6  -4   0  209.94   13.58
   6  -4   0  206.73   13.21
  -6  -4   0  176.43   12.26
  -6  -4   0  182.91   12.82
   6   4   0  187.07   13.05
  -6   4   0  208.65   13.22
   6   4   0  176.26   12.34
  -6   4   0  215.96   13.37
   6   4   0  166.91   12.33
   6   4   0  176.67   12.23
  -6   4   0  201.89   13.18
  -7  -4   0   24.36    2.00
  -7  -4   0   21.97    2.32
   7   4   0   20.20    2.48
   7   4   0   19.09    2.03
   7   4   0   20.99    2.02
   8  -4   0    4.72    1.51
  -8  -4   0    3.99    1.36
   8  -4   0    6.82    2.02
  -8  -4   0    2.50    1.17
  -8  -4   0    5.17    1.03
   8   4   0    5.88    1.03
  -8   4   0    7.31    1.87
  -8   4   0    5.59    1.60
   8   4   0    5.15    1.17
   8   4   0    4.42    1.11
   9  -4   0   17.70    3.27
   9  -4   0   17.19    3.14
  -9  -4   0   21.33    3.02
  -9  -4   0   21.04    2.19
  -9   4   0   16.64    2.99
  -9   4   0   18.89    3.25
   9   4   0   23.13    2.44
   9   4   0   27.28    2.48
   9   4   0   19.38    2.01
 -10  -4   0   24.92    3.20
  10  -4   0   26.90    3.85
 -10  -4   0   22.68    2.52
  10  -4   0   29.12    3.64
  10   4   0   24.00    2.72
 -10   4   0   24.91    3.36
  10   4   0   21.99    2.33
 -10   4   0   27.95    3.61
  10   4   0   25.32    2.68
  11  -4   0   57.30    5.64
 -11  -4   0   53.40    5.16
  11  -4   0   57.91    5.77
  11   4   0   41.92    4.24
 -11   4   0   63.89    5.76
  11   4   0   45.65    4.46
 -11   4   0   58.48    5.56
  11   4   0   53.30    4.13
 -12  -4   0    3.82    1.27
  12  -4   0   11.48    2.78
  12  -4   0   10.95    2.90
 -12  -4   0    3.06    1.66
 -12   4   0    7.34    3.73
 -12   4   0    3.87    2.02
  12   4   0    4.47    1.55
  12   4   0    4.71    1.20
  12   4   0    2.89    1.38
  13  -4   0   66.31    6.86
  13  -4   0   68.92    7.04
 -13  -4   0   66.62    6.50
  13   4   0   75.15    5.92
 -13   4   0   75.16    7.22
 -13   4   0   66.05    6.81
  13   4   0   66.21    5.28
  14  -4   0   15.18    3.61
  14  -4   0   10.52    3.07
 -14  -4   0    9.63    2.76
 -14   4   0   13.67    3.51
  14   4   0   14.80    2.66
 -14   4   0   15.65    3.72
 -15  -4   0   10.56    3.06
  15  -4   0    9.09    2.99
  15  -4   0    8.01    3.24
 -15   4   0    2.01    2.21
  15   4   0   10.74    2.37
 -15   4   0    8.92    3.07
  16  -4   0    7.02    2.88
 -16  -4   0    5.34    2.69
  16  -4   0    7.93    3.13
 -16   4   0    7.79    3.16
 -16   4   0    4.07    3.51
   0  -5   0    1.03    0.47
   0  -5   0    1.49    0.51
   0  -5   0    0.87    0.50
   0   5   0    1.28    0.47
   0   5   0    1.48    0.50
   0   5   0    1.28    0.65
   1  -5   0  133.63    9.17
   1  -5   0  135.16    9.21
  -1  -5   0  137.55    8.92
  -1  -5   0  134.51    8.82
   1  -5   0  133.80    9.28
  -1  -5   0  141.28    9.10
   1  -5   0  132.75    9.21
   1   5   0  141.70    9.09
  -1   5   0  128.66    9.25
  -1   5   0  139.47    9.06
   1   5   0  157.79    8.89
  -1   5   0  139.64    9.12
   1   5   0  140.13    9.24
   2  -5   0 1772.00  112.07
  -2  -5   0 1759.12  111.89
   2  -5   0 1805.40  112.01
   2  -5   0 1860.11  111.95
  -2  -5   0 1638.46  111.46
   2  -5   0 1838.85  111.88
  -2   5   0 1937.93  112.05
  -2   5   0 1814.93  111.85
   2   5   0 1749.50  111.71
   2   5   0 1806.39  111.83
  -2   5   0 1859.33  112.06
   3  -5   0 3095.79  201.57
   3  -5   0 3241.29  201.46
   3  -5   0 3128.24  201.68
   3  -5   0 3201.74  201.42
  -3  -5   0 3415.22  201.35
  -3   5   0 3227.93  201.55
  -3   5   0 3330.88  201.45
  -3   5   0 3391.51  201.62
  -4  -5   0 1242.57   78.24
   4  -5   0 1149.88   78.67
   4  -5   0 1265.83   78.48
   4  -5   0 1153.98   78.56
   4  -5   0 1235.69   78.45
  -4  -5   0 1220.29   78.24
  -4  -5   0 1345.43   77.88
  -4   5   0 1282.01   78.55
   4   5   0 1314.69   78.32
  -4   5   0 1292.03   78.64
  -4   5   0 1313.05   78.49
  -5  -5   0  173.49   11.60
   5  -5   0  203.70   12.43
  -5  -5   0  158.70   11.88
  -5  -5   0  169.06   11.28
   5  -5   0  169.58   12.53
   5  -5   0  177.68   12.43
  -5  -5   0  168.86   11.98
   5   5   0  164.58   11.31
  -5   5   0  210.38   12.60
  -5   5   0  207.02   12.42
  -5   5   0  197.35   12.41
   5   5   0  173.77   12.11
   6  -5   0   90.69    8.51
  -6  -5   0  118.51    7.45
  -6  -5   0  122.46    7.84
  -6  -5   0  120.93    8.14
  -6  -5   0  129.79    8.31
  -6   5   0   97.27    8.30
   6   5   0  115.03    8.37
   6   5   0  131.30    7.38
  -6   5   0  104.05    8.32
  -6   5   0   98.21    8.36
   6   5   0  123.04    7.54
  -7  -5   0  225.34   15.75
   7  -5   0  251.67   16.49
   7  -5   0  255.73   16.77
  -7  -5   0  246.97   16.15
  -7  -5   0  240.71   15.36
  -7  -5   0  244.29   16.00
   7  -5   0  263.13   16.99
  -7   5   0  258.01   16.54
   7   5   0  221.82   15.30
  -7   5   0  264.97   16.56
   7   5   0  237.99   15.27
   7   5   0  227.59   15.42
   7   5   0  215.73   16.24
  -7   5   0  244.14   16.57
   8  -5   0   49.24    5.11
   8  -5   0   41.60    4.67
  -8  -5   0   48.77    4.16
  -8  -5   0   48.00    4.21
  -8  -5   0   52.64    3.65
  -8  -5   0   50.70    4.38
   8   5   0   50.44    3.61
   8   5   0   47.07    3.47
   8   5   0   46.61    3.70
  -8   5   0   49.55    4.69
  -8   5   0   43.14    4.54
   9  -5   0  562.07   37.91
  -9  -5   0  578.57   36.28
   9  -5   0  554.71   37.65
  -9   5   0  582.55   37.56
   9   5   0  560.77   36.22
   9   5   0  562.18   36.42
  -9   5   0  640.98   37.75
 -10  -5   0   35.69    2.93
  10  -5   0   45.59    4.48
 -10  -5   0   27.95    3.43
  10   5   0   32.11    3.03
  10   5   0   28.56    2.62
  10   5   0   32.78    2.84
 -11  -5   0   17.11    2.86
  11  -5   0   10.88    2.95
  11  -5   0   13.13    3.23
 -11  -5   0   17.78    2.02
  11   5   0   18.28    1.83
 -11   5   0   12.60    2.89
  11   5   0   17.65    1.94
 -11   5   0   13.09    2.98
  11   5   0   16.69    2.19
  12  -5   0   47.43    5.25
 -12  -5   0   39.29    3.55
  12  -5   0   46.48    5.33
 -12  -5   0   35.99    4.36
 -12   5   0   40.56    5.40
 -12   5   0   55.15    5.38
  12   5   0   39.43    3.34
  12   5   0   37.28    3.67
  12   5   0   35.18    3.20
 -13  -5   0  204.93   16.01
 -13  -5   0  190.37   14.81
  13  -5   0  237.40   16.89
  13  -5   0  240.64   17.07
 -13   5   0  244.04   16.88
 -13   5   0  236.94   16.79
  13   5   0  228.69   15.28
 -14  -5   0    1.28    1.86
  14  -5   0    1.45    1.78
  14  -5   0    1.51    2.22
 -14   5   0   -1.87    1.47
 -14   5   0    1.31    2.20
  14   5   0   -0.17    0.60
  14   5   0    1.97    1.26
  15  -5   0   21.75    4.38
  15  -5   0   19.96    4.18
 -15  -5   0   11.84    3.22
 -15   5   0   20.15    4.26
 -15   5   0   14.58    3.43
 -16  -5   0    0.21    2.11
  16  -5   0    4.16    2.85
  16  -5   0    5.86    2.78
 -16   5   0    1.91    2.56
 -16   5   0    4.41    2.77
   0  -6   0   82.10    5.71
   0  -6   0   84.01    5.65
   0  -6   0   86.52    5.66
   0  -6   0   79.65    5.67
   0  -6   0   80.32    5.85
   0   6   0   76.82    5.93
   0   6   0   89.89    5.69
   0   6   0   77.05    5.70
  -1  -6   0 1312.28   80.18
   1  -6   0 1270.67   80.32
  -1  -6   0 1338.01   79.91
   1  -6   0 1226.03   80.30
   1  -6   0 1253.88   80.26
  -1  -6   0 1315.11   80.36
   1  -6   0 1248.61   80.16
  -1  -6   0 1283.09   80.00
   1   6   0 1323.09   80.39
  -1   6   0 1238.40   80.07
   1   6   0 1373.24   79.94
  -1   6   0 1267.04   80.45
  -1   6   0 1321.42   80.28
  -1   6   0 1277.77   80.22
   1   6   0 1297.74   80.17
   2  -6   0  417.10   27.52
   2  -6   0  421.64   27.69
   2  -6   0  408.93   27.58
   2  -6   0  413.27   27.74
  -2  -6   0  443.89   27.52
  -2  -6   0  436.49   27.63
  -2  -6   0  446.89   27.22
   2   6   0  443.43   26.97
   2   6   0  454.94   27.60
  -2   6   0  423.15   27.49
  -2   6   0  441.66   27.54
   2   6   0  425.45   27.41
  -2   6   0  441.17   27.80
  -2   6   0  458.78   27.73
  -3  -6   0   10.20    1.45
   3  -6   0    6.13    1.48
  -3  -6   0    8.37    1.38
   3  -6   0    6.54    1.43
   3  -6   0    5.16    1.15
   3   6   0    6.14    1.21
   3   6   0    9.18    1.34
  -3   6   0    7.73    1.43
  -3   6   0    6.42    1.38
  -3   6   0    5.93    1.36
  -4  -6   0  103.39    6.82
  -4  -6   0  108.08    6.93
   4  -6   0   76.38    7.03
   4  -6   0   86.11    6.84
   4  -6   0   84.46    6.82
  -4   6   0   94.08    6.91
   4   6   0  110.55    6.87
  -4   6   0   94.44    7.05
  -4   6   0   98.54    7.14
  -5  -6   0  111.01    7.56
  -5  -6   0  107.15    7.57
   5  -6   0  110.26    7.83
   5  -6   0   96.33    7.86
   5  -6   0   89.24    7.91
  -5  -6   0  102.44    7.03
  -5   6   0  111.49    7.93
  -5   6   0  109.80    7.95
   5   6   0  108.09    7.63
  -5   6   0  111.28    7.80
   6  -6   0 1004.74   65.51
  -6  -6   0 1105.55   65.05
   6  -6   0 1032.65   65.33
  -6  -6   0 1085.83   65.00
   6  -6   0  910.93   65.49
  -6  -6   0 1034.96   64.49
  -6   6   0 1076.68   65.41
  -6   6   0 1071.30   65.50
   6   6   0 1003.09   64.04
   6   6   0 1030.47   65.12
  -7  -6   0  856.82   52.87
  -7  -6   0  845.17   52.40
   7  -6   0  831.94   53.63
  -7  -6   0  850.42   51.87
   7  -6   0  840.45   53.48
  -7  -6   0  815.53   52.76
  -7   6   0  865.12   53.23
  -7   6   0  850.04   53.25
   7   6   0  773.20   51.90
   8  -6   0   18.47    3.25
   8  -6   0   18.89    3.60
  -8   6   0   18.81    3.16
  -8   6   0   12.82    2.56
  -9  -6   0    4.83    0.96
   9  -6   0    7.17    2.10
  -9  -6   0    3.42    2.32
   9  -6   0    9.70    2.61
   9   6   0    4.87    1.10
  -9   6   0    8.60    2.24
  -9   6   0   10.37    2.34
  10  -6   0    1.93    1.63
 -10  -6   0    3.34    0.85
 -10  -6   0    2.99    1.58
  10  -6   0    1.40    1.61
 -10   6   0    1.70    1.44
 -10   6   0    4.11    1.87
  10   6   0    3.76    1.07
 -11  -6   0  118.37    7.91
  11  -6   0  110.30    9.82
 -11  -6   0  105.89    8.82
  11  -6   0  104.50    9.41
  11   6   0  116.94    8.10
 -11   6   0  125.20    9.72
 -11   6   0  124.86    9.65
  12  -6   0   35.29    4.93
  12  -6   0   32.00    4.48
 -12  -6   0   32.57    3.95
 -12  -6   0   33.76    3.02
  12   6   0   31.10    3.21
 -12   6   0   30.91    4.49
 -12   6   0   38.51    4.79
  13  -6   0   11.91    3.32
  13  -6   0   14.65    3.53
 -13  -6   0   15.72    3.15
 -13  -6   0   14.05    2.16
  13   6   0   13.87    2.02
 -13   6   0   17.78    3.81
 -13   6   0   14.07    3.41
  14  -6   0   12.69    3.52
  14  -6   0    7.61    3.23
 -14  -6   0    2.59    1.91
 -14   6   0    6.06    2.71
 -14   6   0    8.04    2.83
  15  -6   0   42.98    5.91
  15  -6   0   41.60    5.72
 -15  -6   0   42.31    5.47
 -15   6   0   32.07    5.29
 -15   6   0   38.61    5.46
  16  -6   0    6.55    3.23
 -16   6   0    6.09    2.62
   0  -7   0    1.12    0.63
   0  -7   0    0.46    0.50
   0  -7   0    0.51    0.48
   0  -7   0    0.70    0.57
   0  -7   0    0.77    0.54
   0   7   0    0.45    0.55
   0   7   0    1.06    0.51
   0   7   0    0.92    0.79
   1  -7   0  625.67   40.92
  -1  -7   0  654.79   40.87
  -1  -7   0  717.94   40.62
   1  -7   0  594.76   40.97
  -1  -7   0  701.71   40.75
  -1  -7   0  624.88   41.01
   1  -7   0  604.59   40.82
   1  -7   0  608.04   40.98
   1   7   0  640.79   40.85
   1   7   0  674.27   41.15
  -1   7   0  686.60   41.28
  -1   7   0  649.00   40.94
   1   7   0  686.84   40.61
  -1   7   0  633.33   40.91
   2  -7   0  857.52   58.88
   2  -7   0  858.63   58.74
  -2  -7   0 1079.98   58.42
  -2  -7   0  985.23   58.90
   2  -7   0  836.06   58.77
  -2  -7   0  969.21   58.70
   2  -7   0  851.62   58.63
  -2   7   0  911.26   58.82
   2   7   0  971.77   58.61
  -2   7   0  875.54   58.58
  -2   7   0  924.92   58.71
   2   7   0 1037.03   58.88
   2   7   0 1036.12   58.14
  -2   7   0  932.77   59.00
   3  -7   0  831.93   58.03
   3  -7   0  878.67   58.15
  -3  -7   0  968.51   58.10
   3  -7   0  875.73   58.31
   3  -7   0  855.51   58.37
  -3  -7   0 1016.52   57.69
  -3  -7   0  948.65   58.20
   3   7   0  983.09   58.05
  -3   7   0  933.93   58.41
  -3   7   0  937.37   58.11
   3   7   0  938.12   57.93
  -3   7   0  917.47   58.31
  -3   7   0  956.80   58.15
  -4  -7   0  310.71   19.78
   4  -7   0  290.69   19.86
  -4  -7   0  313.93   19.89
   4  -7   0  261.76   20.00
   4  -7   0  299.15   19.92
  -4  -7   0  302.09   19.27
   4  -7   0  280.49   20.17
  -4   7   0  341.50   20.28
   4   7   0  325.17   19.72
   4   7   0  319.75   19.65
  -4   7   0  303.23   20.08
  -4   7   0  298.15   19.89
  -5  -7   0   13.92    2.17
   5  -7   0   13.27    2.69
   5  -7   0   19.23    2.36
  -5  -7   0   16.87    1.63
  -5  -7   0   13.84    2.08
   5  -7   0   17.42    2.69
   5  -7   0   19.55    2.33
   5   7   0   11.99    1.98
  -5   7   0   20.71    2.81
  -5   7   0   17.95    2.37
  -5   7   0   18.52    2.47
  -6  -7   0  144.75    9.21
  -6  -7   0  143.29    9.79
   6  -7   0  125.61   10.32
  -6  -7   0  138.68    9.76
   6  -7   0  136.97   10.05
   6  -7   0  132.48   10.27
  -6   7   0  141.39   10.21
   6   7   0  129.88    9.76
  -6   7   0  129.07    9.92
  -6   7   0  157.85   10.35
  -7  -7   0  971.93   62.07
   7  -7   0 1010.26   62.78
   7  -7   0  952.61   62.89
  -7  -7   0  991.21   61.55
  -7  -7   0  943.02   62.02
  -7   7   0  952.40   62.38
   7   7   0  943.86   62.22
  -7   7   0 1118.64   62.80
  -8  -7   0   17.99    2.59
   8  -7   0   13.15    3.04
  -8  -7   0   13.66    2.17
   8  -7   0   18.82    3.41
  -8   7   0   20.10    3.15
  -8   7   0   22.62    3.55
   8   7   0   15.75    2.84
  -9  -7   0   82.42    7.20
   9  -7   0   95.95    8.19
   9  -7   0   92.99    7.92
   9   7   0   84.81    6.01
  -9   7   0   90.21    7.56
  -9   7   0  101.45    7.89
 -10  -7   0   18.84    2.78
  10  -7   0   25.73    3.91
  10  -7   0   25.84    4.15
 -10   7   0   30.35    3.75
  10   7   0   18.99    1.99
 -10   7   0   21.36    3.34
 -11  -7   0  123.15    8.16
  11  -7   0  106.76   10.45
 -11  -7   0  122.96    9.34
  11  -7   0  121.00   10.24
 -11   7   0  120.69   10.10
  11   7   0  126.42    8.34
 -11   7   0  132.65   10.93
 -12  -7   0   11.61    1.46
  12  -7   0   10.48    2.98
  12  -7   0   11.24    3.11
 -12  -7   0    8.68    2.44
 -12   7   0    9.60    3.06
  12   7   0   10.20    1.60
 -12   7   0    8.70    2.66
  13  -7   0   90.84    8.73
 -13  -7   0   89.08    7.85
  13  -7   0   92.00    8.63
 -13   7   0   93.23    8.52
 -13   7   0   81.22    8.26
 -14  -7   0    3.56    2.19
  14  -7   0    2.08    2.56
  14  -7   0    1.22    2.43
 -14   7   0    7.21    2.66
 -14   7   0    2.99    2.26
  15  -7   0   20.70    4.74
  15  -7   0   28.47    5.31
 -15  -7   0   28.06    4.43
 -15   7   0   31.84    8.25
   0  -8   0    7.34    1.31
   0  -8   0    3.95    1.17
   0  -8   0    7.48    1.16
   0  -8   0    8.48    1.31
   0  -8   0    7.06    1.23
   0   8   0    5.29    1.39
   0   8   0    6.38    1.14
   0   8   0    4.14    1.11
  -1  -8   0    4.35    0.81
   1  -8   0    1.71    0.95
  -1  -8   0    3.57    1.08
  -1  -8   0    2.72    0.83
  -1  -8   0    3.32    0.84
  -1  -8   0    2.81    0.87
  -1   8   0    1.55    1.09
  -1   8   0    1.20    0.76
   1   8   0    4.25    1.25
   1   8   0    3.02    0.69
   1   8   0    3.44    0.98
  -2  -8   0 1317.43   85.46
   2  -8   0 1383.10   85.36
   2  -8   0 1351.46   85.47
  -2  -8   0 1332.87   85.29
   2  -8   0 1415.71   85.68
  -2  -8   0 1266.26   84.94
   2  -8   0 1378.04   85.52
   2   8   0 1400.52   85.50
  -2   8   0 1391.70   85.40
  -2   8   0 1415.07   85.77
   2   8   0 1307.96   85.17
  -2   8   0 1394.33   85.50
   2   8   0 1358.67   84.71
  -2   8   0 1451.11   85.31
   3  -8   0  396.50   25.74
   3  -8   0  401.65   25.97
   3  -8   0  382.61   26.05
  -3  -8   0  431.26   25.74
  -3  -8   0  422.20   25.89
  -3  -8   0  396.49   25.23
   3  -8   0  394.66   25.80
  -3   8   0  396.62   25.90
  -3   8   0  369.60   25.63
   3   8   0  399.34   25.52
   3   8   0  400.80   25.64
  -3   8   0  413.97   26.13
  -3   8   0  390.23   25.66
  -4  -8   0   69.13    4.99
  -4  -8   0   63.72    5.01
   4  -8   0   65.39    5.08
   4  -8   0   59.10    5.62
  -4  -8   0   61.60    4.41
   4  -8   0   56.61    5.19
   4  -8   0   49.77    5.17
  -4   8   0   57.93    4.93
  -4   8   0   65.49    5.32
   4   8   0   60.99    4.73
   4   8   0   62.61    4.78
   5  -8   0  481.44   30.79
  -5  -8   0  485.68   30.65
   5  -8   0  483.80   30.76
  -5  -8   0  487.36   29.93
   5  -8   0  440.75   31.06
  -5  -8   0  504.49   30.59
   5  -8   0  445.15   30.92
  -5   8   0  434.13   30.60
  -5   8   0  493.15   30.98
  -5   8   0  497.43   31.04
   5   8   0  471.83   30.44
   6  -8   0   60.00    5.93
  -6  -8   0   76.96    5.80
  -6  -8   0   83.29    5.86
   6  -8   0   54.55    5.99
  -6   8   0   65.07    5.76
   6   8   0   74.01    5.70
  -6   8   0   71.18    6.09
  -7  -8   0  408.75   26.26
   7  -8   0  386.33   26.81
   7  -8   0  373.35   26.95
  -7  -8   0  409.45   26.32
  -7  -8   0  409.86   25.60
  -7   8   0  444.22   26.96
  -7   8   0  382.17   26.48
   7   8   0  399.27   26.36
   8  -8   0   10.71    2.85
  -8  -8   0   21.42    2.38
  -8  -8   0   21.53    3.42
   8  -8   0   17.42    3.38
  -8   8   0   13.31    2.80
  -8   8   0   16.75    3.13
   8   8   0   26.48    3.17
   9  -8   0    7.33    2.49
   9  -8   0   10.19    2.57
  -9  -8   0    2.20    2.08
  -9   8   0    7.01    2.18
  -9   8   0    5.37    1.98
  10  -8   0   10.32    2.87
  10  -8   0   18.99    3.71
 -10  -8   0   12.58    2.30
 -10   8   0   12.99    3.08
 -10   8   0   12.96    2.89
 -11  -8   0   69.85    5.92
  11  -8   0   62.20    6.67
  11  -8   0   62.48    6.88
 -11   8   0   69.48    6.70
 -11   8   0   68.53    6.72
  12  -8   0   30.29    4.64
  12  -8   0   23.69    4.42
 -12  -8   0   24.34    3.62
 -12   8   0   29.46    4.31
 -12   8   0   29.14    4.45
  13  -8   0   86.10    8.58
  13  -8   0   78.97    8.03
 -13  -8   0   82.00    7.31
 -13   8   0   79.08    8.05
 -13   8   0   82.57    8.15
  14  -8   0   -0.80    2.43
  14  -8   0    6.00    3.13
 -14  -8   0    6.37    2.48
 -14   8   0    5.17    2.83
 -14   8   0    0.59    2.35
  15  -8   0    5.66    3.31
 -15  -8   0    8.33    2.56
 -15   8   0    7.88    3.38
 -15   8   0    2.86    2.67
   0  -9   0    1.73    0.88
   0  -9   0    0.41    0.68
   0  -9   0    2.14    0.73
   0  -9   0    1.52    0.77
   0  -9   0    2.15    0.81
   0   9   0    0.83    0.99
   0   9   0    0.97    0.82
   0   9   0    1.67    0.74
   1  -9   0    8.99    1.56
  -1  -9   0    6.56    1.16
  -1  -9   0    9.47    1.48
  -1  -9   0    9.32    1.29
   1  -9   0   10.68    1.71
   1  -9   0    8.99    1.71
   1  -9   0    9.26    1.69
  -1  -9   0    6.97    1.47
  -1  -9   0    6.12    1.25
  -1   9   0   12.86    1.75
  -1   9   0   10.60    2.05
   1   9   0    7.27    1.18
   1   9   0    8.97    1.81
  -1   9   0    7.55    1.43
   1   9   0    8.50    1.49
  -2  -9   0   99.45    7.53
   2  -9   0  107.64    7.65
   2  -9   0  122.81    8.10
  -2  -9   0   93.68    7.66
   2  -9   0  117.15    7.89
   2  -9   0  112.97    7.85
   2   9   0   89.86    7.37
   2   9   0   94.46    7.66
  -2   9   0  111.41    7.74
  -2   9   0  104.24    7.74
  -2   9   0  119.08    7.61
  -2   9   0  109.62    8.11
  -3  -9   0  516.70   30.90
   3  -9   0  475.84   30.75
  -3  -9   0  508.72   30.66
   3  -9   0  485.50   31.06
   3  -9   0  454.86   30.82
  -3  -9   0  487.14   30.18
   3  -9   0  474.36   30.69
  -3   9   0  479.74   30.84
   3   9   0  459.74   30.40
  -3   9   0  453.05   30.51
   3   9   0  506.19   30.67
  -3   9   0  444.85   30.96
  -3   9   0  464.67   30.64
   4  -9   0  174.98   11.82
  -4  -9   0  176.93   11.69
   4  -9   0  175.26   12.15
  -4  -9   0  163.60   11.11
   4  -9   0  166.99   11.78
  -4  -9   0  170.70   11.78
  -4   9   0  167.09   11.69
   4   9   0  161.68   11.45
  -4   9   0  160.95   12.01
  -4   9   0  168.27   11.71
  -4   9   0  180.99   12.01
   4   9   0  162.41   11.48
   5  -9   0  399.38   27.45
  -5  -9   0  400.11   27.11
   5  -9   0  411.91   27.69
  -5  -9   0  429.33   27.09
  -5  -9   0  408.19   26.39
   5   9   0  397.56   26.87
  -5   9   0  437.63   27.64
  -5   9   0  454.63   27.97
   6  -9   0   -0.16    1.28
  -6  -9   0    1.89    1.28
   6  -9   0    0.39    1.34
  -6  -9   0    1.90    1.14
  -6  -9   0    0.80    0.79
  -6   9   0    1.63    1.41
  -6   9   0    2.10    1.33
  -7  -9   0    0.43    0.90
  -7  -9   0    2.76    1.54
   7  -9   0   -0.06    1.45
   7  -9   0    1.53    1.67
  -7  -9   0    0.56    1.25
  -7   9   0    0.59    1.56
   7   9   0    1.79    1.34
  -7   9   0    0.84    1.42
  -8  -9   0  547.92   36.17
   8  -9   0  559.44   37.85
   8  -9   0  596.25   37.75
  -8   9   0  572.94   37.57
  -8   9   0  577.43   37.33
   8   9   0  577.39   37.10
   9  -9   0    0.94    1.72
   9  -9   0    2.13    1.92
  -9   9   0    1.74    1.62
  -9   9   0    2.58    1.86
  10  -9   0    3.64    3.09
 -10   9   0    3.55    2.17
 -10   9   0    6.72    2.41
 -11  -9   0    0.04    1.38
  11  -9   0    3.13    2.04
  11  -9   0    4.09    2.25
 -11   9   0    1.28    1.86
 -11   9   0    3.40    2.13
 -12  -9   0   13.57    2.67
  12  -9   0   14.10    3.67
  12  -9   0   21.15    4.27
 -12   9   0   13.51    3.31
 -12   9   0   17.85    3.86
  13  -9   0   51.09    6.62
 -13  -9   0   50.53    5.34
  13  -9   0   52.52    6.54
 -13   9   0   48.53    6.11
 -13   9   0   49.80    6.21
 -14  -9   0    3.98    2.24
  14  -9   0    8.20    3.32
  14  -9   0    9.00    3.20
 -14   9   0    6.85    2.71
 -14   9   0   10.71    3.43
  15  -9   0    2.52    3.28
  15  -9   0    0.80    2.42
 -15  -9   0    2.35    2.27
 -15   9   0    5.12    3.14
 -15   9   0    4.02    2.86
   0 -10   0 1377.51   83.13
   0 -10   0 1388.05   83.24
   0 -10   0 1337.66   83.52
   0 -10   0 1321.58   83.30
   0 -10   0 1340.01   83.19
   0  10   0 1325.97   83.75
   0  10   0 1319.17   83.32
   0  10   0 1255.92   83.03
  -1 -10   0  393.43   24.56
   1 -10   0  362.23   25.04
  -1 -10   0  404.30   24.83
  -1 -10   0  398.00   24.91
  -1 -10   0  391.28   25.17
   1 -10   0  367.09   24.90
  -1 -10   0  397.44   24.80
   1 -10   0  391.20   24.93
   1  10   0  403.44   25.38
  -1  10   0  393.06   25.53
   1  10   0  404.95   24.97
  -1  10   0  378.26   24.90
  -1  10   0  363.99   24.96
   1  10   0  362.83   24.49
   2 -10   0   55.98    4.59
  -2 -10   0   51.15    4.09
  -2 -10   0   50.24    4.50
   2 -10   0   59.11    4.68
   2 -10   0   54.20    4.45
  -2 -10   0   51.56    4.28
   2 -10   0   51.51    4.64
  -2  10   0   55.41    4.53
   2  10   0   48.82    3.71
  -2  10   0   51.59    4.43
   2  10   0   53.78    4.31
   2  10   0   48.69    4.54
  -2  10   0   53.84    6.33
   3 -10   0   31.02    3.60
   3 -10   0   33.93    3.49
  -3 -10   0   28.02    3.16
  -3 -10   0   29.97    3.11
   3 -10   0   38.67    3.45
  -3 -10   0   29.27    2.76
   3 -10   0   35.67    3.30
   3  10   0   30.54    3.05
  -3  10   0   34.65    3.24
   3  10   0   26.98    3.13
  -3  10   0   31.57    3.50
  -3  10   0   33.30    3.37
  -3  10   0   33.16    3.29
  -4 -10   0  241.07   15.35
   4 -10   0  239.28   16.26
  -4 -10   0  247.04   16.63
  -4 -10   0  237.46   15.89
   4 -10   0  227.77   15.99
   4 -10   0  235.51   16.42
  -4  10   0  230.27   15.86
  -4  10   0  224.71   16.39
  -4  10   0  218.73   16.29
   4  10   0  242.48   15.73
   4  10   0  247.34   15.82
  -4  10   0  235.24   16.16
  -5 -10   0    7.31    1.80
   5 -10   0    4.78    1.90
   5 -10   0    7.03    1.96
  -5 -10   0    6.13    1.64
  -5 -10   0    5.93    1.23
   5  10   0    4.99    1.61
  -5  10   0    7.94    2.10
  -5  10   0    5.98    1.73
  -5  10   0    4.78    1.69
  -6 -10   0   47.59    3.75
  -6 -10   0   55.08    4.70
   6 -10   0   43.25    4.70
  -6 -10   0   54.58    4.60
   6 -10   0   50.19    5.24
  -6  10   0   44.24    4.51
  -6  10   0   40.99    4.81
   6  10   0   40.87    4.34
   7 -10   0    4.48    2.03
   7 -10   0    3.53    1.83
  -7  10   0    4.05    1.65
  -7  10   0    6.34    2.19
   7  10   0    7.76    2.07
   8 -10   0   10.90    2.87
   8 -10   0   10.45    2.76
  -8  10   0   14.10    2.95
  -8  10   0   11.02    2.53
   9 -10   0   95.61    8.57
   9 -10   0   90.77    8.17
  -9 -10   0   95.19    6.93
  -9  10   0   81.82    7.93
   9  10   0   94.60    7.75
  -9  10   0   86.07    7.81
  10 -10   0  153.49   12.12
 -10 -10   0  160.58   10.74
  10 -10   0  159.86   12.49
 -10  10   0  126.85   11.66
 -10  10   0  143.36   12.57
  11 -10   0   64.20    6.82
  11 -10   0   49.90    6.25
 -11 -10   0   61.28    5.46
 -11  10   0   65.62    6.56
 -11  10   0   55.73    6.44
  12 -10   0    0.36    1.74
  12 -10   0    0.78    2.11
 -12 -10   0    1.09    1.60
 -12  10   0   -0.79    1.85
 -12  10   0    1.66    2.14
  13 -10   0   36.60    5.89
  13 -10   0   47.14    6.06
 -13 -10   0   37.62    4.54
 -13  10   0   47.05    5.88
 -13  10   0   33.43    5.25
 -14 -10   0   10.82    2.93
  14 -10   0    9.17    4.03
  14 -10   0   14.24    6.50
 -14  10   0   11.33    4.08
 -14  10   0    7.30    5.13
   0 -11   0    3.87    1.37
   0 -11   0    4.38    1.35
   0 -11   0    4.80    1.17
   0 -11   0    2.73    1.14
   0  11   0    2.96    1.00
   0  11   0    3.30    1.40
  -1 -11   0 1767.55  104.85
  -1 -11   0 1798.21  104.81
   1 -11   0 1586.95  105.00
  -1 -11   0 1706.09  104.45
   1 -11   0 1656.04  105.09
  -1 -11   0 1746.93  105.17
   1 -11   0 1597.77  104.82
   1 -11   0 1646.13  104.85
  -1 -11   0 1734.60  104.73
  -1  11   0 1653.50  105.46
   1  11   0 1697.42  104.41
  -1  11   0 1685.78  104.99
  -1  11   0 1580.12  104.75
   1  11   0 1694.75  104.86
   1  11   0 1666.58  105.29
   2 -11   0 1164.60   76.95
   2 -11   0 1220.11   76.90
  -2 -11   0 1241.91   77.12
  -2 -11   0 1289.65   76.69
  -2 -11   0 1311.56   76.90
  -2 -11   0 1245.33   76.59
   2 -11   0 1138.75   77.09
   2 -11   0 1187.91   77.05
   2  11   0 1218.36   76.73
  -2  11   0 1214.94   77.50
  -2  11   0 1194.35   76.96
   2  11   0 1286.28   77.22
   3 -11   0  927.63   57.06
  -3 -11   0  906.75   56.94
  -3 -11   0  886.19   56.65
   3 -11   0  941.35   57.28
  -3 -11   0  905.30   56.30
   3 -11   0  878.45   56.77
  -3  11   0  909.04   56.59
  -3  11   0  903.83   56.86
   3  11   0  869.84   56.48
  -3  11   0  886.33   57.34
  -3  11   0  874.46   56.85
   3  11   0  887.24   56.86
  -4 -11   0  247.70   18.07
  -4 -11   0  268.14   17.15
   4 -11   0  268.30   18.30
  -4 -11   0  266.98   17.87
   4 -11   0  275.96   18.14
  -4  11   0  256.61   18.26
   4  11   0  264.33   18.12
  -4  11   0  266.57   17.80
   4  11   0  260.74   17.42
  -4  11   0  253.74   17.60
  -5 -11   0   20.44    2.82
   5 -11   0   18.45    3.33
   5 -11   0   21.35    3.47
  -5 -11   0   21.15    3.07
  -5 -11   0   22.18    2.32
  -5  11   0   24.34    3.04
  -5  11   0   19.24    2.91
  -5  11   0   15.51    3.09
   5  11   0   18.92    2.76
   5  11   0   20.05    2.66
   6 -11   0   11.72    2.75
  -6 -11   0   12.67    2.71
   6 -11   0   12.13    2.85
  -6 -11   0   11.36    1.73
  -6  11   0    8.52    2.62
  -6  11   0   12.66    2.57
   6  11   0    8.94    2.13
  -6  11   0   13.43    2.52
   7 -11   0   -1.14    1.30
   7 -11   0   -0.82    1.58
  -7 -11   0    1.61    1.04
   7  11   0    1.92    1.47
  -7  11   0    1.35    1.37
  -7  11   0    0.35    1.41
  -7  11   0   -0.77    1.34
   8 -11   0    7.53    2.48
   8 -11   0    5.87    2.39
  -8 -11   0    7.61    1.62
  -8  11   0   12.90    2.76
  -8  11   0   12.87    3.15
   8  11   0    9.25    2.48
   9 -11   0    6.89    2.76
   9 -11   0    2.00    2.13
  -9 -11   0    2.93    1.27
  -9  11   0    5.09    2.21
  -9  11   0    5.40    2.81
   9  11   0    4.40    2.10
 -10 -11   0  118.19    8.53
  10 -11   0  120.03   10.21
  10 -11   0  113.26   10.27
 -10  11   0  102.40    9.76
 -10  11   0  113.00    9.66
  11 -11   0   21.66    4.43
 -11 -11   0   22.53    3.13
  11 -11   0   22.09    4.29
 -11  11   0   21.96    4.35
 -11  11   0   22.24    4.19
  12 -11   0   30.40    5.66
 -12 -11   0   25.38    3.65
  12 -11   0   36.25    5.68
 -12  11   0   24.92    4.67
 -12  11   0   30.08    5.18
  13 -11   0   99.06    9.89
  13 -11   0  104.27   10.17
 -13  11   0  100.97    9.89
 -13  11   0  100.91    9.74
  14 -11   0   19.16    4.61
  14 -11   0   17.84    4.65
 -14 -11   0   13.67    2.99
 -14  11   0   20.13    4.75
 -14  11   0   16.52    4.41
   0 -12   0   33.46    3.55
   0 -12   0   36.88    3.61
   0 -12   0   34.31    3.46
   0 -12   0   37.91    3.28
   0  12   0   31.95    3.07
   0  12   0   28.83    3.74
   0  12   0   24.05    3.26
  -1 -12   0    2.76    1.03
  -1 -12   0    3.57    1.25
  -1 -12   0    2.60    1.16
  -1 -12   0    2.60    1.24
   1 -12   0    4.97    1.50
   1 -12   0    4.13    1.34
  -1 -12   0    3.98    1.11
   1 -12   0    4.18    1.47
   1  12   0    2.17    1.55
   1  12   0    3.23    1.04
   1  12   0    2.77    1.26
  -1  12   0    3.55    1.21
  -1  12   0    0.93    1.19
  -1  12   0    2.81    1.59
   2 -12   0   11.68    2.19
  -2 -12   0   15.56    2.02
   2 -12   0    7.75    2.20
  -2 -12   0   13.19    2.08
   2 -12   0   11.22    2.57
  -2 -12   0   14.98    2.47
  -2 -12   0   18.79    2.50
   2  12   0   13.75    2.17
   2  12   0   22.49    2.92
  -2  12   0   11.03    2.07
   2  12   0   13.22    1.51
  -2  12   0   11.91    2.72
  -2  12   0   14.28    2.85
  -3 -12   0    1.07    1.06
   3 -12   0    2.04    1.56
  -3 -12   0    1.09    1.18
  -3 -12   0    0.50    0.82
   3 -12   0    1.39    1.21
   3  12   0    2.16    1.32
  -3  12   0    1.89    1.46
   3  12   0    0.80    0.42
  -3  12   0    1.02    1.20
   3  12   0    2.47    1.27
   4 -12   0   68.64    5.60
  -4 -12   0   52.88    5.11
   4 -12   0   67.27    5.77
  -4 -12   0   57.70    4.57
  -4 -12   0   50.00    4.89
  -4  12   0   63.59    5.38
   4  12   0   46.90    4.81
   4  12   0   48.34    4.79
  -4  12   0   58.95    5.73
  -4  12   0   58.77    5.03
  -5 -12   0  240.89   16.17
   5 -12   0  238.41   16.67
   5 -12   0  239.02   16.89
  -5 -12   0  244.14   15.52
   5  12   0  216.72   15.84
  -5  12   0  237.14   16.88
  -5  12   0  225.32   16.10
   5  12   0  230.97   15.90
  -5  12   0  242.56   16.36
   6 -12   0    8.31    2.39
  -6 -12   0    2.86    1.16
   6 -12   0    4.51    2.26
   6  12   0    1.80    1.31
  -6  12   0    1.72    1.87
  -6  12   0    3.60    1.78
  -6  12   0    2.63    1.77
   7 -12   0    9.69    2.69
  -7 -12   0    4.99    1.36
   7 -12   0    6.84    2.63
   7  12   0    5.91    1.92
  -7  12   0    4.11    1.97
  -7  12   0    4.37    1.98
  -7  12   0    6.16    2.50
   8 -12   0  117.50   11.11
  -8 -12   0  113.30    8.32
   8 -12   0  121.53   10.73
  -8  12   0  126.88    9.65
   8  12   0  110.94    9.18
  -8  12   0  112.45    9.40
  -8  12   0  122.98   10.89
   9 -12   0    6.04    2.74
   9 -12   0    7.92    2.88
  -9 -12   0    7.02    1.75
  -9  12   0    9.31    2.70
  -9  12   0    6.83    2.66
   9  12   0    7.43    2.42
  10 -12   0  121.06   11.15
 -10 -12   0  139.15    9.33
  10 -12   0  122.50   10.90
 -10  12   0  117.99   10.81
 -10  12   0  122.05   10.45
  11 -12   0   15.62    4.11
 -11 -12   0   13.73    2.63
  11 -12   0   18.60    4.36
 -11  12   0   16.52    4.01
 -11  12   0   15.40    3.64
 -12 -12   0   20.81    3.43
  12 -12   0   24.06    5.03
  12 -12   0   27.20    5.09
 -12  12   0   26.10    4.93
 -12  12   0   20.60    4.43
  13 -12   0    4.64    3.13
  13 -12   0    1.59    2.80
 -13 -12   0    1.06    1.79
 -13  12   0    0.25    2.57
 -13  12   0    2.95    2.66
   0 -13   0    3.57    1.43
   0 -13   0    3.16    1.34
   0 -13   0    2.76    1.19
   0  13   0    3.37    1.67
   0  13   0    2.48    1.18
  -1 -13   0   60.00    5.33
   1 -13   0   69.21    5.56
   1 -13   0   67.65    5.49
   1 -13   0   69.05    5.83
  -1 -13   0   60.46    5.33
  -1 -13   0   67.49    5.11
  -1 -13   0   66.76    5.39
  -1  13   0   64.52    5.68
   1  13   0   64.92    4.96
  -1  13   0   72.88    6.39
   1  13   0   62.55    6.04
  -1  13   0   68.00    5.48
  -2 -13   0    2.19    1.22
  -2 -13   0    3.05    1.25
   2 -13   0    2.09    1.41
   2 -13   0    1.77    1.37
  -2 -13   0    2.94    1.27
  -2  13   0    2.36    1.74
  -2  13   0    0.35    1.28
  -2  13   0   -0.82    1.03
   2  13   0    3.78    1.89
   2  13   0    2.79    0.88
  -3 -13   0  133.89    9.04
   3 -13   0  124.18    9.53
  -3 -13   0  123.37    9.21
  -3 -13   0  132.76    9.09
   3 -13   0  120.70    9.77
   3  13   0  122.65    9.49
  -3  13   0  125.82    9.52
  -3  13   0  118.18   10.02
   3  13   0  127.00    8.04
   3  13   0  125.21    9.16
   4 -13   0   30.69    3.74
  -4 -13   0   33.33    3.15
   4 -13   0   30.92    4.04
  -4 -13   0   30.20    3.43
   4  13   0   25.26    3.50
  -4  13   0   33.30    3.80
  -4  13   0   25.72    3.92
   4  13   0   26.90    3.35
  -5 -13   0    7.68    1.65
   5 -13   0   16.73    3.35
   5 -13   0   12.64    2.74
  -5  13   0   12.41    2.80
  -5  13   0   11.98    2.50
   5  13   0   10.54    2.33
  -5  13   0   12.66    2.44
   5  13   0    8.58    2.13
   6 -13   0  113.62   10.27
  -6 -13   0  135.84    8.98
   6 -13   0  130.26   10.30
  -6  13   0  127.26    9.93
  -6  13   0  125.34    9.73
   6  13   0  136.52    9.67
  -6  13   0  118.64   10.32
   7 -13   0  121.92   10.43
   7 -13   0  118.99   10.61
  -7 -13   0  130.96    8.99
   7  13   0  133.78    9.88
  -7  13   0  121.03   10.58
  -7  13   0  133.49   10.25
  -7  13   0  136.48   10.15
   8 -13   0   70.73    7.20
  -8 -13   0   71.19    5.60
   8 -13   0   65.97    7.23
  -8  13   0   75.01    7.49
   8  13   0   69.74    6.44
  -8  13   0   74.31    6.80
  -8  13   0   73.39    6.77
   9 -13   0   17.63    4.20
  -9 -13   0   29.49    3.05
   9 -13   0   22.22    4.40
  -9  13   0   22.98    4.05
  -9  13   0   17.18    5.16
  -9  13   0   25.15    4.73
   9  13   0   26.73    3.79
 -10 -13   0   34.00    3.52
  10 -13   0   26.15    4.93
  10 -13   0   27.27    5.23
 -10  13   0   29.55    5.39
 -10  13   0   29.34    4.61
 -10  13   0   24.35    4.18
  11 -13   0    7.64    3.30
  11 -13   0   -1.07    3.03
 -11 -13   0    5.76    1.86
 -11  13   0    8.37    2.95
 -11  13   0    8.03    2.80
 -12 -13   0   44.67    4.87
  12 -13   0   57.43   10.60
  12 -13   0   54.61   10.41
 -12  13   0   37.96    5.68
 -12  13   0   46.39    6.65
  13 -13   0    0.71    2.42
 -13 -13   0    0.85    1.91
  13 -13   0    2.68    2.56
 -13  13   0   -0.62    2.76
   0 -14   0 1551.21  105.33
   0 -14   0 1751.24  105.09
   0  14   0 1683.13  104.95
   0  14   0 1793.73  106.22
   0  14   0 1643.36  105.38
  -1 -14   0   73.32    5.53
   1 -14   0   63.54    6.10
  -1 -14   0   64.05    6.11
  -1 -14   0   72.25    5.83
   1 -14   0   60.63    5.73
   1  14   0   85.86    6.83
  -1  14   0   72.90    6.21
  -1  14   0   77.83    7.01
   1  14   0   74.43    5.41
   1  14   0   72.09    6.09
  -1  14   0   72.22    5.79
  -2 -14   0  486.57   31.78
  -2 -14   0  475.30   31.81
   2 -14   0  484.59   32.36
  -2 -14   0  496.79   31.80
   2 -14   0  496.03   32.13
   2  14   0  474.54   31.83
   2  14   0  512.97   32.50
  -2  14   0  525.46   33.04
  -2  14   0  494.74   32.22
   2  14   0  489.45   31.04
  -3 -14   0   60.87    5.20
   3 -14   0   55.10    5.59
   3 -14   0   54.68    5.80
  -3 -14   0   67.44    5.24
   3  14   0   70.33    5.93
  -3  14   0   59.96    5.68
  -3  14   0   63.66    6.41
   3  14   0   65.25    5.45
   4 -14   0  285.93   20.85
  -4 -14   0  318.00   20.13
   4 -14   0  297.00   21.16
  -4  14   0  301.26   20.79
   4  14   0  299.39   20.30
  -4  14   0  321.50   21.65
   4  14   0  313.53   20.62
   5 -14   0    4.64    2.12
   5 -14   0    7.80    2.61
  -5 -14   0    2.63    1.27
   5  14   0    5.27    1.82
  -5  14   0    5.35    1.89
   5  14   0    1.76    1.42
  -5  14   0   10.52    2.52
  -5  14   0    5.03    2.30
  -6 -14   0    7.60    1.70
   6 -14   0    5.67    2.45
   6 -14   0    6.10    2.43
  -6  14   0    4.76    2.18
  -6  14   0    4.73    2.08
  -6  14   0    6.37    2.07
   6  14   0    7.44    2.11
   7 -14   0   10.54    2.94
   7 -14   0   12.46    3.15
  -7  14   0   15.91    3.66
   7  14   0   11.08    2.63
  -7  14   0   14.17    2.99
  -7  14   0   12.26    2.84
  -8 -14   0    1.36    1.12
   8 -14   0    2.11    2.44
   8 -14   0   -1.77    1.69
  -8  14   0    0.68    1.81
  -8  14   0   -0.72    1.99
   8  14   0    0.97    1.60
  -8  14   0   -0.88    1.48
   9 -14   0    3.61    2.33
   9 -14   0    0.53    1.88
  -9 -14   0    2.82    1.38
  -9  14   0    3.74    2.07
  -9  14   0    1.28    2.43
   9  14   0    2.59    1.83
  -9  14   0   -0.11    1.62
  10 -14   0   90.89    8.97
  10 -14   0   80.77    8.31
 -10 -14   0   75.68    6.47
 -10  14   0   80.67    8.62
 -10  14   0   76.52    7.71
 -10  14   0   87.25    7.94
  11 -14   0    2.51    2.48
  11 -14   0    6.23    3.12
 -11 -14   0   -0.38    1.66
 -11  14   0    3.39    2.34
 -11  14   0    1.59    2.25
 -11  14   0    4.77    2.70
  12 -14   0   32.14    6.47
  12 -14   0   35.43    6.08
 -12 -14   0   40.27    4.36
 -12  14   0   35.92    6.27
 -12  14   0   37.10    5.56
 -12  14   0   33.99    5.54
   0 -15   0    1.67    1.08
   0 -15   0    1.78    1.26
   0  15   0    1.44    1.17
   0  15   0    2.27    1.72
   0  15   0    0.67    1.30
   1 -15   0   26.26    3.41
   1 -15   0   33.06    3.84
  -1 -15   0   35.67    3.72
   1  15   0   37.37    4.38
   1  15   0   31.81    3.64
  -1  15   0   30.71    3.85
   1  15   0   30.93    2.98
  -1  15   0   31.51    3.36
  -1  15   0   35.98    4.52
   2 -15   0  322.22   22.88
   2 -15   0  329.88   23.25
  -2 -15   0  361.00   22.82
   2  15   0  344.06   21.86
  -2  15   0  349.03   23.91
   2  15   0  342.62   22.75
  -2  15   0  333.45   23.07
   2  15   0  370.69   23.51
  -3 -15   0   23.59    3.25
   3 -15   0   27.62    3.85
   3 -15   0   25.27    3.46
  -3  15   0   33.09    4.63
   3  15   0   29.67    3.49
   3  15   0   27.58    3.74
  -3  15   0   31.46    3.75
   4 -15   0  113.01    9.41
  -4 -15   0  107.21    8.45
   4 -15   0  109.33    9.14
  -4 -15   0  112.68    8.57
   4  15   0  119.55    8.71
  -4  15   0  112.29    9.11
  -4  15   0  125.82    9.99
   4  15   0  111.63    8.82
  -5 -15   0   66.02    6.02
   5 -15   0   59.64    6.32
   5 -15   0   59.76    6.05
   5  15   0   65.92    5.70
   5  15   0   63.82    5.68
  -5  15   0   58.44    6.03
  -5  15   0   64.61    7.39
   6 -15   0   45.91    5.49
  -6 -15   0   41.44    4.21
  -6  15   0   46.07    5.67
  -6  15   0   42.79    4.57
  -6  15   0   39.51    4.92
   6  15   0   33.99    4.21
   7 -15   0   -0.13    1.76
  -7 -15   0    0.75    1.10
   7 -15   0    1.54    2.04
   7  15   0    2.41    1.76
  -7  15   0    0.49    1.56
  -7  15   0   -2.29    1.38
  -7  15   0    0.26    2.00
   8 -15   0   31.69    4.96
  -8 -15   0   31.69    3.30
   8 -15   0   29.90    5.02
  -8  15   0   43.11    5.52
  -8  15   0   25.06    4.14
   8  15   0   35.04    4.21
  -8  15   0   28.86    4.68
  -9 -15   0   39.44    3.70
   9 -15   0   32.65    5.35
   9 -15   0   29.41    5.37
   9  15   0   37.24    5.06
  -9  15   0   32.67    4.68
  -9  15   0   26.73    5.13
  -9  15   0   29.11    4.48
  10 -15   0   -1.43    1.81
 -10 -15   0    0.33    1.48
  10 -15   0   -2.70    2.03
 -10  15   0   -0.75    1.81
 -10  15   0    3.42    2.24
 -10  15   0   -1.87    2.31
  11 -15   0   13.65    4.24
  11 -15   0   11.48    3.78
 -11 -15   0   12.50    2.63
 -11  15   0   10.66    3.46
 -11  15   0   11.02    3.99
 -11  15   0   12.50    3.51
   0 -16   0  133.87   10.35
   0 -16   0  140.74    9.89
   0  16   0  141.82   10.34
   0  16   0  140.86   11.05
   0  16   0  132.10    9.69
   1 -16   0    6.09    1.70
   1 -16   0    4.93    1.79
  -1 -16   0    3.96    1.54
   1  16   0    5.39    1.84
   1  16   0    2.37    1.97
  -1  16   0    3.84    1.86
  -1  16   0    4.41    2.38
   1  16   0    3.90    1.13
   2 -16   0   28.23    3.86
  -2 -16   0   36.01    3.62
   2 -16   0   25.03    3.50
  -2  16   0   34.89    4.04
  -2  16   0   30.70    4.84
   2  16   0   27.47    4.00
   2  16   0   30.32    2.64
   2  16   0   29.68    3.69
  -3 -16   0    4.71    1.70
   3 -16   0    3.96    1.94
   3 -16   0    3.01    1.83
   3  16   0    7.11    2.29
  -3  16   0    7.51    2.25
   3  16   0    5.90    1.98
  -3  16   0    7.37    2.56
  -4 -16   0    1.23    1.23
   4 -16   0    0.13    1.44
   4 -16   0    0.26    1.43
  -4  16   0    0.69    1.70
   4  16   0    0.44    1.42
   4  16   0    1.02    1.49
  -4  16   0   -0.36    2.05
   5 -16   0   24.41    4.22
   5 -16   0   28.01    3.89
  -5 -16   0   20.64    2.84
   5  16   0   22.38    3.52
   5  16   0   20.85    3.42
  -5  16   0   28.62    4.26
  -5  16   0   34.10    4.77
  -6 -16   0  105.77    7.61
   6 -16   0   94.75    8.80
   6 -16   0   97.97    9.25
   6  16   0  106.63    8.31
  -6  16   0  100.87    9.51
  -6  16   0   99.73    8.76
   7 -16   0   38.21    5.31
   7 -16   0   36.92    5.13
  -7 -16   0   34.45    3.57
  -7  16   0   35.66    5.78
  -7  16   0   33.34    4.76
   7  16   0   38.78    4.45
  -7  16   0   36.87    4.50
  -8 -16   0   29.46    3.30
   8 -16   0   26.01    5.23
   8 -16   0   27.97    4.93
  -8  16   0   31.00    5.55
  -8  16   0   31.56    4.48
  -8  16   0   30.16    4.81
   8  16   0   29.06    4.09
  -9 -16   0    7.67    1.90
   9 -16   0    9.31    2.90
   9 -16   0    4.49    2.94
  -9  16   0    8.45    2.84
  -9  16   0    4.63    2.46
  -9  16   0    5.82    3.25
   9  16   0    9.56    2.66
  10 -16   0  178.08   14.92
 -10 -16   0  159.19   12.11
 -10  16   0  176.63   19.42
 -10  16   0  168.91   13.42
 -10  16   0  185.24   13.99
   0 -17   0    0.78    1.44
   0  17   0   -1.04    1.39
   0  17   0    0.85    1.33
   0  17   0   -1.92    1.65
   1 -17   0  123.86    9.33
  -1 -17   0  123.87    9.48
   1 -17   0  124.31    9.83
  -1  17   0  123.28    9.71
  -1  17   0  123.95   10.47
   1  17   0  129.97   10.34
   1  17   0  124.19    9.44
   1  17   0  119.94    8.59
   2 -17   0   10.34    2.72
   2 -17   0   11.42    2.39
  -2 -17   0    5.66    1.91
  -2  17   0    5.16    2.08
   2  17   0    9.36    2.60
   2  17   0    3.53    1.03
   2  17   0    6.22    1.95
   3 -17   0  283.69   19.47
   3 -17   0  278.14   19.84
  -3 -17   0  285.50   19.02
   3  17   0  301.44   19.11
  -3  17   0  272.69   20.35
  -3  17   0  257.73   19.36
   3  17   0  278.31   19.51
   4 -17   0  117.91    9.35
   4 -17   0  107.23    9.56
  -4 -17   0  108.13    8.40
  -4  17   0  105.53    9.17
  -4  17   0  101.37    9.75
   4  17   0  113.67    8.62
   4  17   0  113.72    9.01
  -5 -17   0   12.14    2.24
   5 -17   0    6.54    2.53
   5 -17   0    8.85    2.92
   5  17   0    6.91    2.08
  -5  17   0    7.66    2.62
  -5  17   0    1.18    2.40
   5  17   0    8.67    2.60
  -6 -17   0    0.98    1.24
   6 -17   0    0.96    1.85
   6 -17   0    0.55    1.79
  -6  17   0    2.19    2.26
   6  17   0    3.00    1.93
  -6  17   0   -0.87    1.90
   7 -17   0  111.63    9.93
   7 -17   0  118.47   10.34
  -7 -17   0  110.62    8.22
   7  17   0  110.69    8.97
  -7  17   0  101.00   10.24
  -7  17   0  111.24    9.61
  -8 -17   0  148.22   11.33
   8 -17   0  177.72   13.97
   8 -17   0  168.74   13.48
  -8  17   0  160.21   13.91
   8  17   0  159.22   12.45
  -8  17   0  176.33   13.32
  -9 -17   0    6.04    1.90
   9 -17   0    5.52    2.91
   9  17   0    1.35    2.49
  -9  17   0    6.15    2.64
  -9  17   0    5.38    2.92
   0 -18   0   15.68    3.09
   0  18   0   12.38    3.30
   0  18   0   13.40    2.78
  -1 -18   0   18.38    3.26
   1 -18   0   17.51    3.34
   1 -18   0   17.54    2.92
  -1  18   0   13.82    3.55
  -1  18   0   16.77    3.10
   1  18   0   14.76    5.33
   1  18   0   17.65    2.97
  -2 -18   0    9.93    2.34
   2 -18   0   10.53    2.42
   2 -18   0    6.38    2.40
   2  18   0    8.88    2.29
  -2  18   0    7.20    2.30
  -2  18   0   10.14    2.99
  -3 -18   0   65.23    5.77
   3 -18   0   59.66    6.00
   3 -18   0   63.12    6.60
  -3  18   0   60.13    7.03
  -3  18   0   63.50    6.30
   3  18   0   68.49    6.00
   4 -18   0  224.68   16.86
   4 -18   0  228.92   17.32
  -4 -18   0  233.11   16.14
  -4  18   0  239.10   16.96
  -4  18   0  238.69   17.97
   4  18   0  237.13   16.31
   5 -18   0    8.28    2.87
  -5 -18   0    4.38    1.75
   5 -18   0    9.90    2.93
  -5  18   0    5.97    2.89
   5  18   0    8.68    2.49
   5  18   0    4.37    2.13
  -5  18   0    6.71    2.41
  -6 -18   0   40.72    3.95
   6 -18   0   37.40    5.33
   6 -18   0   30.73    5.40
  -6  18   0   29.05    5.77
   6  18   0   42.11    4.63
  -6  18   0   25.95    4.59
  -7 -18   0    6.32    1.90
   7 -18   0    7.19    2.85
   7 -18   0    6.54    3.06
  -7  18   0    3.92    2.52
  -7  18   0    7.82    3.46
   8 -18   0    2.75    2.66
  -8 -18   0   -1.59    1.54
   8  18   0    3.95    2.24
  -8  18   0   -0.48    1.89
   0 -19   0    0.08    1.64
   0  19   0    1.44    2.40
   0  19   0   -0.30    1.61
   1 -19   0    4.78    2.54
  -1 -19   0    6.16    2.28
   1  19   0    9.19    2.31
  -1  19   0    7.94    2.43
  -1  19   0    6.61    2.99
   1  19   0   10.71    2.95
   2 -19   0    6.71    2.24
  -2 -19   0    7.34    2.19
   2 -19   0    5.28    2.29
   2  19   0    6.53    2.13
   2  19   0    4.73    2.50
  -2  19   0    6.21    3.22
  -2  19   0    5.18    2.29
   3 -19   0    8.03    2.83
  -3 -19   0   10.32    2.49
   3  19   0   10.35    2.86
  -3  19   0    6.76    3.10
  -3  19   0    8.05    2.76
   3  19   0   14.43    2.75
   4 -19   0    4.75    2.13
   4 -19   0    2.57    2.29
  -4 -19   0    4.79    1.79
   4  19   0    8.24    2.67
  -4  19   0    2.17    2.13
   4  19   0    5.22    2.26
  -4  19   0    2.33    2.83
   5 -19   0    7.79    2.65
  -5 -19   0   10.31    2.30
   5 -19   0    3.41    2.74
   5  19   0   10.74    2.45
  -5  19   0    2.93    2.23
  -5  19   0    1.67    2.88
   6 -19   0   15.52    3.56
  -6 -19   0   13.82    2.59
   6 -19   0   18.08    4.07
  -6  19   0   12.14    3.16
  -6  19   0   14.00    3.96
   0 -20   0    7.24    2.65
   0  20   0    7.83    3.28
   0  20   0    4.55    2.11
  -1 -20   0   21.54    4.91
   1 -20   0   29.85    4.49
   1  20   0   30.12    4.70
  -1  20   0   29.28    4.17
   1  20   0   27.19    4.07
  -1  20   0   31.72    5.36
   2 -20   0   58.99    6.64
  -2 -20   0   70.56    6.37
   2  20   0   60.87    6.72
  -2  20   0   73.47    6.61
  -2  20   0   68.25    7.66
   3 -20   0    3.07    1.99
  -3 -20   0    4.76    2.04
   3 -20   0    3.17    2.22
  -3  20   0    4.30    2.35
   3  20   0    2.68    2.43
   3  20   0   -0.62    1.42
  -3  20   0    2.47    2.79
   4 -20   0   21.53    3.92
   4 -20   0   24.27    4.64
  -4 -20   0   25.89    3.63
  -4  20   0   23.17    5.13
   4  20   0   22.29    3.81
  -4  20   0   19.50    3.66
  16   0  -1   -1.48    1.76
 -16   0   1    0.86    2.07
  16   0  -1   -0.94    1.67
 -16   0   1    1.20    2.05
  15   0  -1  160.86   12.41
 -15   0   1  153.15   12.68
 -15   0   1  160.90   12.83
  14   0  -1   -1.20    1.55
  14   0  -1   -1.63    1.55
 -14   0   1   -0.07    2.00
  13   0  -1  275.52   19.07
  13   0  -1  263.62   18.87
 -12   0   1   -1.85    1.41
  12   0  -1    1.19    1.70
  12   0  -1    1.04    1.40
  11   0  -1  625.28   39.97
  11   0  -1  633.93   40.22
 -11   0   1  591.51   40.14
  10   0  -1   -0.49    1.22
  10   0  -1   -0.77    1.06
  10   0  -1    1.55    1.14
 -10   0   1    0.94    1.36
 -10   0   1    1.29    1.22
   9   0  -1    2.45    1.34
  -9   0   1    2.91    1.34
  -9   0   1    2.31    1.16
   9   0  -1    3.46    1.16
   9   0  -1    3.06    1.44
  -8   0   1    1.31    1.21
   8   0  -1    2.55    1.28
  -8   0   1    0.50    0.83
   8   0  -1    0.95    0.91
  -8   0   1    1.81    0.90
   8   0  -1    1.13    0.90
   7   0  -1  386.07   25.04
   7   0  -1  390.09   24.84
   7   0  -1  391.11   24.56
  -7   0   1  373.57   24.81
  -7   0   1  393.35   24.69
  -7   0   1  362.07   24.80
  -6   0   1   -0.07    0.66
   6   0  -1    0.65    0.74
  -6   0   1   -0.07    0.79
   6   0  -1    0.42    0.67
  -6   0   1   -0.42    0.51
   5   0  -1  401.89   26.00
  -5   0   1  410.55   26.06
  -5   0   1  397.24   26.01
  -5   0   1  405.01   25.93
   5   0  -1  425.98   25.90
   4   0  -1    2.96    0.81
  -4   0   1    4.60    0.95
  -4   0   1    3.64    0.86
   4   0  -1    5.34    0.93
  -3   0   1  696.82   43.19
   3   0  -1  755.05   43.14
   3   0  -1  645.82   43.12
  -3   0   1  690.23   43.16
  -3   0   1  671.86   43.10
  -2   0   1    1.71    0.41
   2   0  -1    1.54    0.47
  -2   0   1    1.60    0.39
   2   0  -1    1.47    0.39
   2   0  -1    2.53    0.46
   1   0   1  298.49   18.34
   1   0   1  295.68   18.34
   1   0   1  289.00   18.35
  -2   0  -1    1.19    0.38
  -2   0  -1    0.85    0.39
   2   0   1    0.70    0.44
   3   0   1 1438.44   90.44
   3   0   1 1432.94   90.38
  -3   0  -1 1458.90   90.40
  -3   0  -1 1453.03   90.39
  -3   0  -1 1506.23   90.54
   4   0   1    4.07    0.89
  -4   0  -1    1.82    0.71
   5   0   1  715.16   44.05
  -5   0  -1  654.32   43.99
   5   0   1  727.13   43.91
   5   0   1  701.27   44.13
  -5   0  -1  702.96   44.03
  -6   0  -1    1.60    0.90
   6   0   1    1.44    0.95
   6   0   1    1.18    0.86
  -6   0  -1    1.71    0.87
   6   0   1    1.61    0.78
  -7   0  -1 1407.84   82.79
   7   0   1 1359.63   82.51
   7   0   1 1285.46   82.69
   7   0   1 1259.60   82.78
  -7   0  -1 1299.95   82.80
   8   0   1    0.02    0.67
   8   0   1    0.17    0.82
   8   0   1    0.35    0.87
  -8   0  -1    1.71    1.04
  -8   0  -1    0.40    0.81
  -9   0  -1  165.83   11.66
  -9   0  -1  156.79   11.80
   9   0   1  161.45   11.61
   9   0   1  176.76   12.10
  10   0   1    1.24    1.17
 -10   0  -1    0.50    1.27
  10   0   1    0.04    0.95
  10   0   1    2.67    1.37
  11   0   1 2074.08  126.84
  11   0   1 2007.83  126.73
 -11   0  -1 1993.14  127.01
  12   0   1    0.35    1.65
  12   0   1    0.49    1.48
 -12   0  -1   -0.17    1.44
 -12   0  -1    0.59    1.54
  13   0   1   92.55    7.60
  13   0   1   85.42    7.58
 -13   0  -1   79.78    7.70
  14   0   1   -2.56    1.33
  14   0   1    1.31    1.68
 -14   0  -1   -0.06    1.75
 -14   0  -1   -1.36    1.51
  15   0   1    2.74    1.96
  15   0   1    4.15    2.20
 -15   0  -1    6.27    2.53
 -15   0  -1    0.60    1.95
 -16   0  -1    2.12    2.33
 -16   0  -1   -0.41    2.08
  16   0   1    1.39    2.07
  16   0   1    2.45    2.25
 -16  -1   1    1.42    2.43
  16  -1  -1    4.26    2.53
 -16  -1   1    2.44    2.47
  16  -1  -1    2.89    2.27
  16   1  -1    0.73    1.96
  16   1  -1    0.67    2.03
 -16   1   1    2.87    2.77
 -16   1   1   -3.81    1.79
  15  -1  -1   62.87    6.61
  15  -1  -1   67.56    6.79
 -15  -1   1   62.76    6.93
 -15   1   1   70.23    6.90
  15   1  -1   58.98    6.85
  15   1  -1   66.45    6.32
 -15   1   1   57.43    6.82
  14  -1  -1   43.30    4.92
 -14  -1   1   33.23    4.73
  14  -1  -1   45.03    5.22
  14   1  -1   35.48    4.48
 -14   1   1   38.20    4.97
 -14   1   1   41.23    5.16
  14   1  -1   26.77    4.19
  13  -1  -1    2.51    1.90
 -13  -1   1    0.18    1.35
  13  -1  -1   -1.75    1.47
  13   1  -1    1.73    1.67
  13   1  -1    0.50    1.45
 -13   1   1    1.09    1.83
 -13   1   1    0.53    1.53
 -12  -1   1   21.33    3.65
  12  -1  -1   11.64    2.97
  12  -1  -1   14.32    3.09
  12   1  -1   21.21    3.39
  12   1  -1   19.14    3.08
 -11  -1   1   11.09    2.59
  11  -1  -1    9.36    2.40
  11  -1  -1    6.35    2.32
  11   1  -1   12.82    2.66
 -11   1   1    4.23    2.00
  11   1  -1    8.52    2.95
  11   1  -1   11.04    2.27
 -10  -1   1   25.74    2.92
 -10  -1   1   23.23    3.19
  10  -1  -1   14.91    3.16
  10   1  -1   22.86    3.02
  10   1  -1   25.16    2.66
  10   1  -1   26.78    3.27
  -9  -1   1  241.10   17.07
   9  -1  -1  256.43   17.43
   9  -1  -1  264.18   16.90
   9  -1  -1  244.57   17.13
  -9  -1   1  254.39   16.76
   9   1  -1  246.48   16.56
   9   1  -1  243.11   16.90
  -9   1   1  274.63   17.11
   9   1  -1  239.65   17.10
  -9   1   1  253.95   17.31
  -8  -1   1   21.64    2.53
  -8  -1   1   21.96    2.42
  -8  -1   1   21.98    2.65
   8   1  -1   20.58    2.64
   8   1  -1   21.38    2.27
  -8   1   1   12.91    2.61
   8   1  -1   20.66    2.45
  -7  -1   1  794.30   52.52
   7  -1  -1  870.46   52.97
  -7  -1   1  861.81   52.34
   7  -1  -1  857.42   52.73
  -7  -1   1  820.56   52.57
   7  -1  -1  879.71   52.51
  -7   1   1  809.01   52.64
   7   1  -1  813.15   52.66
   7   1  -1  836.64   52.19
   7   1  -1  833.24   52.47
  -7   1   1  760.80   52.58
  -7   1   1  861.27   52.60
   6  -1  -1 1161.70   74.60
  -6  -1   1 1254.27   74.77
  -6  -1   1 1210.35   74.68
  -6  -1   1 1232.65   74.50
   6  -1  -1 1192.28   74.79
   6  -1  -1 1241.75   75.07
  -6   1   1 1013.42   74.62
  -6   1   1 1146.69   74.71
  -6   1   1 1149.41   74.66
   6   1  -1 1288.55   74.65
   6   1  -1 1254.91   74.40
  -5  -1   1 2445.58  153.56
  -5  -1   1 2485.56  153.44
   5  -1  -1 2539.97  153.76
  -5  -1   1 2442.09  153.64
   5  -1  -1 2671.05  153.66
   5   1  -1 2424.04  153.52
  -5   1   1 2485.43  153.66
  -5   1   1 2334.84  153.66
   4  -1  -1  868.09   63.73
  -4  -1   1 1053.25   63.59
   4  -1  -1 1024.49   63.77
  -4  -1   1 1024.53   63.67
  -4  -1   1 1121.84   63.84
   4   1  -1 1023.78   63.64
  -4   1   1 1021.44   63.79
   4   1  -1 1161.39   63.60
  -4   1   1  933.65   63.76
   4   1  -1  998.41   63.84
  -3  -1   1 2561.58  158.25
  -2  -1   1   12.40    1.03
  -2  -1   1   12.28    1.17
  -2  -1   1   13.58    1.09
   2  -1  -1   16.27    1.31
   2  -1  -1   13.97    1.21
   2   1  -1   13.25    1.06
   2   1  -1   12.96    1.06
  -2   1   1   14.03    1.22
   2   1  -1   12.97    1.20
  -2   1   1   14.91    1.25
   1   1   1 1313.20   80.25
  -1   1  -1 1196.47   83.10
  -1   1  -1 1222.09   83.63
   1   1   1 1342.85   80.11
   2  -1   1   18.73    1.43
   2  -1   1   14.56    1.29
  -2  -1  -1   13.88    1.14
  -2  -1  -1   13.36    1.19
  -2  -1  -1   12.63    1.22
  -2  -1  -1   13.64    1.13
   2  -1   1   14.29    1.37
  -2   1  -1   13.69    1.26
  -2   1  -1   13.13    1.32
   2   1   1   11.98    1.04
   2   1   1   15.30    1.15
  -2   1  -1   16.61    1.44
  -2   1  -1   14.11    1.28
   3  -1   1    8.73    1.19
   3  -1   1    8.47    1.20
  -3  -1  -1    7.81    1.07
  -3  -1  -1    8.58    0.99
  -3  -1  -1    8.72    0.99
   3  -1   1    9.95    1.13
   3   1   1    8.79    1.01
  -3   1  -1    8.14    1.11
   3   1   1    8.42    0.97
   3   1   1    9.76    0.93
  -3   1  -1    7.80    1.09
  -4  -1  -1 3029.71  186.87
   4  -1   1 3001.22  186.95
  -4  -1  -1 3088.83  186.75
   4  -1   1 2917.47  187.01
  -4   1  -1 3183.16  186.99
  -4   1  -1 2898.40  186.89
   5  -1   1 1237.81   73.31
  -5  -1  -1 1090.17   72.91
  -5  -1  -1 1068.62   72.97
   5  -1   1 1239.24   73.19
   5  -1   1 1273.22   73.08
  -5  -1  -1 1159.26   72.90
   5   1   1 1115.14   72.86
   5   1   1 1216.51   72.74
  -5   1  -1 1156.11   73.09
  -5   1  -1 1221.08   73.15
   5   1   1 1099.89   72.92
   6  -1   1  561.73   34.96
  -6  -1  -1  530.64   34.70
   6  -1   1  557.52   34.67
  -6  -1  -1  565.97   34.59
   6  -1   1  552.61   34.81
  -6  -1  -1  516.99   34.61
  -6   1  -1  489.02   34.67
  -6   1  -1  522.98   34.73
   6   1   1  579.69   34.38
   6   1   1  561.06   34.66
   6   1   1  564.17   34.59
  -7  -1  -1  552.21   36.61
  -7  -1  -1  612.78   38.46
   7  -1   1  564.24   36.72
   7  -1   1  572.81   36.88
   7  -1   1  609.70   36.60
  -7  -1  -1  596.56   36.54
   7   1   1  526.84   36.42
   7   1   1  528.02   36.49
   7   1   1  588.94   36.25
  -7   1  -1  625.72   36.84
  -7   1  -1  552.49   36.73
   8  -1   1  568.26   35.11
  -8  -1  -1  542.21   35.19
  -8  -1  -1  530.32   35.18
   8  -1   1  565.43   35.45
   8  -1   1  559.36   35.30
  -8  -1  -1  574.13   35.05
   8   1   1  538.69   34.67
  -8   1  -1  604.31   35.90
  -8   1  -1  553.20   35.32
  -8   1  -1  539.41   35.32
   8   1   1  499.94   34.98
   8   1   1  506.98   34.93
   9  -1   1    7.60    1.61
   9  -1   1    7.09    1.88
  -9  -1  -1    1.81    1.32
   9  -1   1    5.65    1.72
  -9   1  -1    5.02    1.64
   9   1   1    3.44    1.33
  -9   1  -1    4.46    1.70
   9   1   1    7.90    1.47
   9   1   1    2.59    1.31
 -10  -1  -1  194.49   12.77
 -10  -1  -1  186.87   13.08
  10  -1   1  178.12   13.07
  10  -1   1  180.35   12.98
 -10   1  -1  177.30   13.14
  10   1   1  174.38   12.71
  10   1   1  179.16   12.28
 -10   1  -1  179.32   13.10
  10   1   1  180.40   12.78
 -11  -1  -1   59.91    5.72
  11  -1   1   65.63    5.86
  11  -1   1   64.00    5.82
 -11   1  -1   61.74    5.88
  11   1   1   53.82    4.80
 -11   1  -1   60.23    5.78
  11   1   1   57.69    5.38
  11   1   1   53.32    5.28
  12  -1   1  182.58   13.56
  12  -1   1  177.26   13.49
 -12  -1  -1  203.38   13.82
 -12   1  -1  164.16   13.42
  12   1   1  192.91   13.33
 -12   1  -1  166.04   13.47
  12   1   1  197.16   13.31
  13  -1   1   66.61    6.19
  13  -1   1   61.69    6.01
 -13   1  -1   57.81    5.99
  13   1   1   55.56    5.51
  13   1   1   50.92    5.50
 -13   1  -1   64.56    6.34
 -14  -1  -1    7.19    2.62
 -14  -1  -1    5.47    2.39
  14  -1   1    3.75    2.11
  14   1   1    9.40    2.48
  14   1   1   10.12    2.43
 -14   1  -1    5.76    2.32
 -14   1  -1    8.75    2.99
 -15  -1  -1  275.81   18.96
  15  -1   1  235.52   18.33
  15  -1   1  250.63   18.67
 -15  -1  -1  274.59   19.04
  15   1   1  277.27   18.13
 -15   1  -1  218.29   18.60
  15   1   1  279.28   19.53
 -15   1  -1  249.96   18.79
  16  -1   1    0.94    2.18
  16  -1   1    3.75    2.45
 -16  -1  -1    2.01    2.24
 -16  -1  -1    0.16    2.42
 -16   1  -1    1.83    2.79
  16   1   1    1.87    2.22
  16   1   1    1.14    1.69
 -16   1  -1    0.33    2.07
  16  -2  -1    4.11    2.73
  16  -2  -1    5.58    2.70
 -16  -2   1    2.43    2.30
  16   2  -1   -0.53    1.74
 -16   2   1    2.81    2.33
 -16   2   1    3.03    2.44
  16   2  -1    3.83    2.09
  15  -2  -1    3.44    2.37
 -15  -2   1    5.53    2.46
  15  -2  -1    7.39    2.77
 -15   2   1    7.04    2.72
  15   2  -1    6.70    2.32
  15   2  -1    6.68    1.99
 -15   2   1    1.55    2.30
  14  -2  -1   10.54    3.05
 -14  -2   1   12.76    3.19
  14  -2  -1   11.00    2.98
 -14   2   1    4.74    2.46
  14   2  -1   12.28    2.67
  14   2  -1   11.02    2.54
 -14   2   1    9.55    3.14
  13  -2  -1  140.62   11.15
 -13  -2   1  149.68   11.31
  13  -2  -1  136.47   11.27
  13   2  -1  147.65   10.69
  13   2  -1  141.65   10.62
 -13   2   1  131.42   11.15
 -13   2   1  132.56   11.20
 -12  -2   1   15.27    3.09
  12  -2  -1   16.04    3.22
  12  -2  -1   19.62    3.55
 -12   2   1   14.01    3.15
  12   2  -1   20.38    3.09
 -12   2   1   10.77    2.98
  12   2  -1   22.02    3.10
 -11  -2   1   38.68    4.63
  11  -2  -1   50.42    5.00
 -11  -2   1   39.30    3.96
  11  -2  -1   55.09    5.29
  11   2  -1   37.83    4.28
 -11   2   1   51.28    5.20
  11   2  -1   43.58    3.89
  11   2  -1   38.97    4.21
 -11   2   1   52.81    5.15
 -10  -2   1  258.43   16.16
  10  -2  -1  223.83   16.94
 -10  -2   1  260.79   16.81
  10  -2  -1  237.15   16.81
  10   2  -1  232.44   17.05
 -10   2   1  233.44   16.84
  10   2  -1  236.89   16.32
   9  -2  -1   97.40    7.07
   9  -2  -1   94.93    7.27
  -9  -2   1   85.51    6.54
   9  -2  -1   87.17    7.38
  -9  -2   1   85.36    6.98
  -9   2   1   94.74    7.14
  -9   2   1   95.62    7.33
   9   2  -1   86.50    6.91
   9   2  -1   80.83    6.31
   9   2  -1   81.93    6.68
   8  -2  -1   21.51    3.56
   8  -2  -1   22.71    2.64
   8  -2  -1   21.50    2.96
  -8   2   1   20.83    2.63
  -8   2   1   17.72    2.76
  -8   2   1   23.44    2.83
   8   2  -1   27.06    2.81
  -7  -2   1   66.89    4.58
   7  -2  -1   58.71    5.24
  -7  -2   1   60.25    4.82
   7  -2  -1   54.13    4.99
   7  -2  -1   57.02    4.80
  -7  -2   1   65.47    4.96
   7   2  -1   58.86    4.65
   7   2  -1   64.49    4.92
  -7   2   1   57.73    4.86
   7   2  -1   64.60    4.45
  -7   2   1   47.04    4.81
  -6  -2   1  220.46   14.76
   6  -2  -1  227.77   15.13
   6  -2  -1  222.00   15.29
  -6  -2   1  227.19   14.56
  -6  -2   1  236.22   14.93
   6  -2  -1  227.31   14.96
   6   2  -1  225.40   14.68
   6   2  -1  229.30   14.92
  -6   2   1  193.14   14.90
   6   2  -1  244.72   14.54
  -6   2   1  220.26   14.98
   5  -2  -1  263.37   15.75
  -5  -2   1  228.71   15.55
  -5  -2   1  219.88   15.39
  -5  -2   1  240.64   15.30
   5  -2  -1  250.13   15.83
   5   2  -1  234.40   15.70
   5   2  -1  230.25   15.21
  -5   2   1  256.21   15.76
  -5   2   1  240.13   15.72
   5   2  -1  229.31   15.35
  -4  -2   1  379.18   23.70
   4  -2  -1  330.09   23.89
  -4  -2   1  381.44   23.59
  -4  -2   1  407.75   23.95
  -4   2   1  339.91   23.93
   4   2  -1  371.94   23.98
   4   2  -1  420.99   23.63
   4   2  -1  376.68   23.67
  -3  -2   1 1292.35   83.94
  -3  -2   1 1393.53   84.28
   3  -2  -1 1215.51   84.32
  -3  -2   1 1337.33   84.04
   3   2  -1 1233.24   84.23
  -3   2   1 1341.78   84.32
  -3   2   1 1573.17   84.74
   3   2  -1 1480.18   84.03
   2  -2  -1  146.44   10.56
  -2  -2   1  178.78   10.58
   2  -2  -1  144.76   10.62
  -2  -2   1  171.60   10.41
  -2  -2   1  174.68   10.58
  -2   2   1  151.38   10.60
   2   2  -1  172.22   10.58
   2   2  -1  186.50   10.32
  -2   2   1  137.85   10.52
   2   2  -1  179.80   10.42
  -1  -2   1    4.20    0.59
  -1  -2   1    4.77    0.62
   1   2  -1    3.57    0.56
   1   2  -1    4.87    0.60
   1   2  -1    3.86    0.46
   0  -2   1 1037.47   69.34
   0  -2   1 1039.49   69.79
   0  -2  -1 1102.69   68.03
   0  -2  -1 1080.75   67.79
  -1  -2  -1 2657.17  169.42
   1  -2   1 2650.20  174.40
   1  -2   1 2640.65  174.98
  -1  -2  -1 2644.30  169.35
  -1   2  -1 2608.95  174.60
  -1   2  -1 2567.12  175.06
   1   2   1 3045.97  169.48
   1   2   1 3011.94  169.58
  -2  -2  -1    9.39    0.71
   2  -2   1    6.34    0.86
   2  -2   1    5.74    0.87
   2  -2   1    7.35    1.10
  -2  -2  -1    9.66    0.76
  -2  -2  -1    7.87    0.65
  -2  -2  -1    9.37    0.90
   2  -2   1    6.15    0.95
  -2   2  -1    5.22    0.95
  -2   2  -1    7.97    0.95
  -2   2  -1    5.92    0.92
   2   2   1    9.79    0.96
  -2   2  -1    8.96    1.14
  -3  -2  -1 1558.66   93.13
   3  -2   1 1373.32   93.23
   3  -2   1 1432.91   93.33
   3  -2   1 1633.66   93.26
  -3  -2  -1 1465.02   92.87
  -3  -2  -1 1481.20   93.08
  -3   2  -1 1594.42   93.32
   3   2   1 1557.75   92.87
   3   2   1 1571.78   92.84
  -3   2  -1 1440.65   93.17
  -3   2  -1 1404.45   93.16
  -4  -2  -1   13.59    1.38
   4  -2   1   14.95    1.59
   4  -2   1   13.24    1.76
  -4  -2  -1   12.69    1.34
   4  -2   1   13.24    1.66
  -4  -2  -1   13.45    1.54
  -4   2  -1   15.19    1.69
  -4   2  -1   11.78    1.54
  -4   2  -1   13.72    1.62
   4   2   1   17.05    1.25
   4   2   1   13.37    1.32
   4   2   1   10.50    1.27
   5  -2   1  180.70   11.45
   5  -2   1  179.83   11.33
   5  -2   1  176.59   11.18
  -5  -2  -1  152.03   10.84
  -5  -2  -1  155.02   10.99
  -5   2  -1  176.51   11.28
  -5   2  -1  162.66   11.12
   5   2   1  152.33   10.73
   5   2   1  147.29   10.75
   5   2   1  170.26   10.61
  -6  -2  -1  649.57   40.72
  -6  -2  -1  621.57   40.94
   6  -2   1  685.84   41.26
   6  -2   1  665.02   41.06
  -6  -2  -1  647.38   40.86
   6  -2   1  685.52   41.41
  -6   2  -1  594.27   41.00
   6   2   1  653.40   40.48
  -6   2  -1  593.84   41.02
   6   2   1  672.85   40.79
   6   2   1  662.00   40.73
  -6   2  -1  640.43   41.14
  -7  -2  -1  159.34    9.91
   7  -2   1  137.08   10.15
   7  -2   1  129.56    9.92
  -7  -2  -1  154.45    9.64
  -7  -2  -1  146.95   10.35
   7  -2   1  138.54    9.83
  -7   2  -1  144.59   10.02
   7   2   1  141.45    9.61
   7   2   1  143.61    9.29
  -7   2  -1  117.67    9.75
  -7   2  -1  122.58    9.83
   7   2   1  138.87    9.55
   8  -2   1   94.88    8.49
  -8  -2  -1  123.25    8.53
  -8  -2  -1  128.72    8.23
   8  -2   1  104.78    8.29
   8  -2   1   96.40    8.46
  -8   2  -1  100.27    8.42
   8   2   1  125.89    8.25
  -8   2  -1  108.58    8.50
   8   2   1  120.64    7.84
   8   2   1  132.99    8.33
   9  -2   1  309.88   19.28
   9  -2   1  310.55   18.80
   9  -2   1  300.82   19.06
  -9  -2  -1  274.41   18.38
  -9  -2  -1  273.36   18.75
  -9   2  -1  264.31   18.89
   9   2   1  261.14   17.98
  -9   2  -1  273.26   18.87
   9   2   1  262.93   18.41
   9   2   1  261.80   18.39
 -10  -2  -1    9.93    2.26
 -10  -2  -1    8.24    1.87
  10   2   1    7.42    1.90
  10   2   1    6.87    1.43
 -10   2  -1   15.86    2.73
  10   2   1    5.02    1.99
 -10   2  -1   15.76    2.71
 -11  -2  -1   58.57    5.36
  11  -2   1   57.66    5.63
  11  -2   1   54.89    5.52
 -11   2  -1   42.39    5.19
 -11   2  -1   44.65    5.26
  11   2   1   56.98    5.01
  11   2   1   57.71    5.08
  11   2   1   63.95    5.12
  12  -2   1   66.95    6.68
  12  -2   1   72.24    6.70
 -12  -2  -1   81.28    6.88
 -12   2  -1   64.44    6.72
  12   2   1   74.47    5.64
  12   2   1   71.05    6.07
 -12   2  -1   68.72    6.71
  12   2   1   75.11    6.21
  13  -2   1  212.22   15.03
  13  -2   1  204.02   14.92
 -13  -2  -1  210.36   15.02
 -13   2  -1  187.90   14.77
  13   2   1  188.82   14.15
  13   2   1  192.80   13.99
 -13   2  -1  202.78   15.01
 -14  -2  -1   -0.02    1.71
  14  -2   1   -0.63    1.68
  14  -2   1   -0.70    1.43
 -14   2  -1    0.85    1.87
  14   2   1    0.60    1.42
 -14   2  -1    0.90    1.79
  14   2   1    1.01    1.33
 -15  -2  -1  131.25   10.30
 -15  -2  -1  124.39   10.39
  15  -2   1  118.68   10.15
  15  -2   1  119.59   10.13
 -15   2  -1  115.43   10.18
  15   2   1  117.14    9.56
 -15   2  -1  115.47   10.32
  15   2   1  103.99    8.87
  16  -2   1   21.79    4.01
 -16  -2  -1    9.64    2.93
  16  -2   1   15.81    3.64
 -16  -2  -1    8.56    3.13
 -16   2  -1   20.62    4.09
  16   2   1   13.70    3.15
  16  -3  -1   74.25    7.47
  16  -3  -1   68.95    7.32
 -16  -3   1   55.81    7.03
  16   3  -1   65.30    6.40
 -16   3   1   61.54    7.20
  15  -3  -1   12.13    3.25
  15  -3  -1   20.48    4.19
 -15  -3   1   11.57    3.16
  15   3  -1   18.14    3.10
 -15   3   1   17.11    4.14
  15   3  -1   13.72    2.86
 -15   3   1   15.71    3.86
  14  -3  -1    9.98    3.02
  14  -3  -1    6.79    2.63
 -14  -3   1   11.40    3.01
  14   3  -1   13.14    2.47
  14   3  -1   13.77    2.59
 -14   3   1   10.85    3.23
 -14   3   1   10.63    3.30
  13  -3  -1   41.98    5.16
 -13  -3   1   37.24    4.87
  13  -3  -1   51.66    5.29
  13   3  -1   36.45    4.14
 -13   3   1   48.60    5.41
  13   3  -1   36.22    4.20
  13   3  -1   37.85    3.71
 -13   3   1   41.15    5.14
  12  -3  -1    4.04    1.91
 -12  -3   1    3.26    1.96
  12  -3  -1    3.79    2.01
 -12   3   1    0.75    1.56
  12   3  -1    1.00    1.38
 -12   3   1    1.98    1.88
  12   3  -1    2.66    1.51
  12   3  -1    4.10    1.30
 -11  -3   1  238.23   15.42
  11  -3  -1  210.98   15.67
 -11  -3   1  219.69   14.44
  11  -3  -1  213.80   15.48
 -11   3   1  205.98   15.33
 -11   3   1  212.70   15.43
  11   3  -1  202.98   15.13
  11   3  -1  206.88   14.74
  10  -3  -1   32.34    4.67
 -10  -3   1   53.10    4.73
  10  -3  -1   43.92    4.80
 -10  -3   1   47.91    3.96
  10   3  -1   48.69    4.21
 -10   3   1   35.36    4.58
  10   3  -1   49.91    4.40
 -10   3   1   38.54    4.57
  10   3  -1   55.47    3.96
   9  -3  -1  498.60   37.10
  -9  -3   1  655.81   37.16
   9  -3  -1  518.17   37.38
  -9  -3   1  595.68   36.43
   9   3  -1  587.36   36.80
   9   3  -1  615.95   36.72
  -9   3   1  547.32   37.19
   9   3  -1  579.07   36.27
  -9   3   1  569.17   37.24
   8  -3  -1   49.39    4.32
   8  -3  -1   47.27    4.68
   8  -3  -1   43.90    4.34
  -8  -3   1   44.80    3.62
  -8  -3   1   46.10    4.06
  -8  -3   1   44.94    4.10
   8   3  -1   45.71    3.83
   8   3  -1   43.18    3.51
  -8   3   1   49.47    4.34
   8   3  -1   49.66    4.04
  -8   3   1   42.02    4.26
  -8   3   1   41.10    4.28
  -7  -3   1    0.58    0.88
   7  -3  -1    2.78    1.44
  -7  -3   1   -0.12    0.83
  -7  -3   1    0.27    0.59
   7  -3  -1    3.06    1.46
  -7   3   1    1.04    1.09
   7   3  -1    0.05    0.55
   7   3  -1    0.43    0.66
  -7   3   1    1.57    0.99
   7   3  -1    0.42    0.73
  -6  -3   1  726.58   45.23
  -6  -3   1  755.45   45.47
  -6  -3   1  759.49   44.98
   6  -3  -1  707.23   45.55
   6  -3  -1  702.53   45.73
   6  -3  -1  687.04   45.87
   6   3  -1  751.84   45.13
  -6   3   1  649.63   45.50
   6   3  -1  741.30   45.31
   6   3  -1  782.25   45.72
   6   3  -1  750.37   44.95
  -6   3   1  644.85   45.48
  -6   3   1  699.79   45.59
  -5  -3   1  520.35   32.51
  -5  -3   1  500.74   32.69
   5  -3  -1  536.44   33.15
   5  -3  -1  529.80   33.27
  -5  -3   1  522.46   32.96
   5   3  -1  525.92   32.55
   5   3  -1  523.11   33.10
  -5   3   1  557.40   33.24
  -5   3   1  488.43   33.05
  -5   3   1  489.54   33.05
   5   3  -1  533.02   32.65
  -4  -3   1  663.16   38.18
   4  -3  -1  588.13   38.23
  -4  -3   1  639.68   37.71
  -4  -3   1  648.05   37.89
   4  -3  -1  513.07   38.23
   4   3  -1  631.51   38.23
  -4   3   1  624.33   38.34
  -4   3   1  531.09   38.13
   4   3  -1  694.87   37.83
  -4   3   1  527.97   38.13
  -3  -3   1 1187.11   75.77
  -3  -3   1 1188.19   75.62
  -3  -3   1 1149.54   76.19
   3  -3  -1 1175.46   76.23
  -3  -3   1 1252.53   76.05
   3  -3  -1 1342.42   76.21
  -3   3   1 1139.80   76.05
  -3   3   1 1142.50   76.08
   3   3  -1 1291.27   75.77
   3   3  -1 1275.76   75.67
  -3   3   1 1355.42   76.28
   3   3  -1 1188.05   76.04
   2  -3  -1  359.78   21.49
  -2  -3   1  330.34   21.43
  -2  -3   1  317.29   21.44
  -2  -3   1  321.18   21.24
   2  -3  -1  351.09   21.46
   2  -3  -1  326.60   21.55
   2   3  -1  309.94   21.37
  -2   3   1  348.25   21.44
  -2   3   1  376.39   21.60
   2   3  -1  327.25   21.40
   2   3  -1  360.14   21.21
  -2   3   1  350.54   21.49
  -1  -3   1 3049.38  188.66
   1  -3  -1 2971.43  190.46
  -1  -3   1 2934.77  187.99
   1  -3  -1 2970.11  191.00
   1   3  -1 3003.06  188.37
   1   3  -1 2978.72  188.90
   0  -3  -1 1475.29   91.22
   1  -3   1 8429.92  529.46
   1  -3   1 8512.44  530.42
  -2  -3  -1 1712.83  111.70
  -2  -3  -1 1771.60  111.96
   2  -3   1 1849.49  112.25
   2  -3   1 1834.65  112.32
  -2  -3  -1 1768.77  111.95
  -2   3  -1 1793.74  112.16
   2   3   1 1764.26  111.97
  -2   3  -1 1764.00  112.20
  -2   3  -1 2035.61  112.43
  -3  -3  -1 1186.64   75.17
  -3  -3  -1 1195.07   75.38
   3  -3   1 1333.05   75.73
   3  -3   1 1195.98   75.77
   3  -3   1 1210.80   75.87
   3  -3   1 1347.16   75.74
  -3  -3  -1 1152.23   75.63
  -3  -3  -1 1146.23   75.14
  -3   3  -1 1361.65   75.86
   3   3   1 1212.22   75.14
  -3   3  -1 1137.48   75.63
   3   3   1 1127.93   75.50
  -3   3  -1 1203.21   75.68
  -4  -3  -1  181.95   10.94
   4  -3   1  154.84   11.47
   4  -3   1  173.87   11.45
   4  -3   1  152.30   11.54
  -4  -3  -1  171.01   11.25
  -4  -3  -1  168.09   10.96
  -4   3  -1  174.35   11.56
  -4   3  -1  155.68   11.36
   4   3   1  182.21   10.78
   4   3   1  176.54   11.37
   4   3   1  184.53   10.84
   5  -3   1    9.69    1.68
  -5  -3  -1    6.01    0.89
  -5  -3  -1    3.82    1.09
   5  -3   1   10.27    1.44
  -5  -3  -1    5.66    1.01
   5   3   1    6.53    1.00
  -5   3  -1    9.08    1.54
  -5   3  -1    7.29    1.42
  -5   3  -1    7.59    1.42
   5   3   1    4.18    0.83
   5   3   1    5.65    0.77
  -6  -3  -1   29.25    2.91
  -6  -3  -1   30.25    2.77
   6  -3   1   38.47    3.59
  -6  -3  -1   32.16    2.62
  -6   3  -1   33.47    3.19
  -6   3  -1   34.30    3.21
  -6   3  -1   38.74    3.35
   6   3   1   27.68    2.57
   6   3   1   26.93    2.53
   6   3   1   32.56    2.42
  -7  -3  -1    4.11    1.31
  -7  -3  -1    4.71    1.06
   7  -3   1    8.02    1.86
   7  -3   1    8.56    2.01
   7  -3   1    9.57    1.88
   7   3   1    5.27    1.17
  -7   3  -1    8.00    1.70
  -7   3  -1    5.98    1.71
   7   3   1    5.51    0.96
   7   3   1    7.06    1.26
   8  -3   1    2.28    1.15
  -8  -3  -1    3.47    0.93
   8  -3   1    3.16    1.37
  -8  -3  -1    2.29    1.12
  -8  -3  -1    2.26    1.17
   8  -3   1    2.03    1.39
  -8   3  -1    2.27    1.26
   8   3   1    1.68    0.81
   8   3   1    1.70    0.85
  -8   3  -1    4.14    1.39
  -8   3  -1    3.37    1.37
  -9  -3  -1    3.80    1.48
   9  -3   1   10.09    2.33
   9  -3   1    8.89    2.33
  -9  -3  -1    6.38    1.46
   9   3   1    7.48    1.55
   9   3   1    5.39    1.44
   9   3   1    8.14    1.34
  -9   3  -1    9.90    2.38
  -9   3  -1    6.59    1.92
 -10  -3  -1  347.50   23.42
  10  -3   1  391.50   24.70
 -10  -3  -1  330.53   23.89
  10  -3   1  379.77   24.44
  10   3   1  354.56   23.57
  10   3   1  336.83   23.38
 -10   3  -1  378.02   24.40
  10   3   1  345.71   23.04
 -10   3  -1  398.03   24.53
  11  -3   1  392.57   27.55
  11  -3   1  386.97   27.40
 -11  -3  -1  419.92   26.55
 -11  -3  -1  425.14   27.24
  11   3   1  418.20   26.70
  11   3   1  426.84   26.14
  11   3   1  436.89   26.57
 -11   3  -1  381.06   27.34
 -11   3  -1  380.24   27.29
 -12  -3  -1  235.66   17.48
  12  -3   1  257.85   17.92
  12  -3   1  272.00   18.15
 -12   3  -1  239.18   17.88
  12   3   1  254.26   17.03
  12   3   1  268.68   17.30
  12   3   1  236.35   16.30
 -12   3  -1  234.33   17.71
  13  -3   1   24.54    4.31
 -13  -3  -1   24.92    3.73
  13   3   1   25.49    3.02
 -13   3  -1   24.87    4.30
  13   3   1   26.91    3.61
 -13   3  -1   24.84    4.22
  13   3   1   26.23    3.33
  14  -3   1   17.42    3.66
  14  -3   1   17.99    3.60
 -14  -3  -1   13.08    3.12
  14   3   1   15.21    2.47
 -14   3  -1   14.88    3.54
 -14   3  -1   11.96    3.31
  14   3   1   16.68    2.95
 -15  -3  -1  141.09   11.56
  15  -3   1  146.86   11.73
  15  -3   1  140.06   11.69
  15   3   1  140.54   10.75
 -15   3  -1  145.23   11.91
 -15   3  -1  121.33   11.44
  16  -3   1   68.01    7.58
 -16  -3  -1   63.13    7.16
  16  -3   1   70.37    7.48
 -16  -3  -1   70.58    7.32
 -16   3  -1   83.92    8.33
 -16  -4   1   -0.52    1.99
  16  -4  -1    3.44    2.52
  16  -4  -1   -0.10    2.12
 -16   4   1   -0.16    2.49
  16   4  -1   -1.43    1.35
  16   4  -1   -0.07    1.24
  15  -4  -1   15.43    3.88
  15  -4  -1   13.81    3.54
 -15  -4   1   12.70    3.40
 -15   4   1   17.04    4.18
 -15   4   1   12.99    3.65
  15   4  -1   16.79    2.91
  14  -4  -1    1.98    2.22
  14  -4  -1   -0.88    1.82
 -14  -4   1    0.99    1.85
 -14   4   1    1.63    2.19
  14   4  -1    1.72    1.75
  14   4  -1    1.47    1.36
  14   4  -1    1.38    1.25
 -14   4   1    4.39    2.50
  13  -4  -1   -0.84    1.88
  13  -4  -1    2.23    2.00
 -13  -4   1   -0.49    1.43
  13   4  -1    1.64    1.33
  13   4  -1   -0.02    1.06
 -13   4   1   -1.45    1.53
 -13   4   1    0.21    1.89
  12  -4  -1   28.38    4.19
 -12  -4   1   30.39    3.87
 -12  -4   1   26.11    2.95
  12  -4  -1   28.75    4.07
  12   4  -1   26.82    2.81
  12   4  -1   29.39    3.31
 -12   4   1   29.24    3.96
 -12   4   1   33.17    4.33
  11  -4  -1   20.73    3.89
 -11  -4   1   25.53    3.47
  11  -4  -1   27.15    3.72
 -11   4   1   25.39    3.69
  11   4  -1   28.07    2.75
  11   4  -1   27.64    3.11
  11   4  -1   28.86    3.11
 -11   4   1   26.81    3.83
  10  -4  -1   25.97    4.26
 -10  -4   1   39.84    3.96
 -10  -4   1   38.39    3.23
  10  -4  -1   26.14    3.99
 -10   4   1   25.71    3.88
 -10   4   1   27.98    3.86
  10   4  -1   44.22    3.24
  10   4  -1   38.82    3.48
  10   4  -1   38.08    3.54
  -9  -4   1   91.81    6.32
   9  -4  -1   84.10    7.55
  -9  -4   1   86.96    6.90
   9  -4  -1   75.00    7.16
   9   4  -1   88.38    6.59
  -9   4   1   88.33    7.31
  -9   4   1   89.67    7.31
   9   4  -1   92.30    6.26
   9   4  -1   94.26    6.57
   8  -4  -1    0.00    1.11
  -8  -4   1    1.98    1.04
   8  -4  -1   -0.18    1.04
  -8  -4   1    1.70    1.00
  -8  -4   1    1.33    0.70
   8  -4  -1    1.15    1.27
  -8   4   1    0.31    1.04
   8   4  -1    1.37    0.81
  -8   4   1    0.33    1.02
   8   4  -1    0.29    0.61
   8   4  -1    0.62    0.62
  -8   4   1    0.25    1.10
  -7  -4   1  162.63   10.64
   7  -4  -1  157.53   11.94
  -7  -4   1  154.36   11.27
   7  -4  -1  165.95   11.10
  -7  -4   1  155.99   10.20
   7   4  -1  146.65   10.99
  -7   4   1  155.22   11.09
   7   4  -1  149.69   10.33
  -7   4   1  164.73   11.75
  -7   4   1  153.21   11.60
   7   4  -1  147.98   10.19
   7   4  -1  159.90   10.51
  -6  -4   1   18.63    1.83
  -6  -4   1   16.63    1.46
   6  -4  -1   13.16    2.39
  -6  -4   1   15.23    1.97
   6  -4  -1   14.74    2.01
   6  -4  -1   15.65    2.33
   6   4  -1   13.33    1.65
   6   4  -1   17.89    1.54
   6   4  -1   14.20    1.50
  -6   4   1   14.26    1.98
   6   4  -1   15.30    2.13
  -6   4   1   13.39    2.08
  -6   4   1   13.40    2.06
   5  -4  -1  812.04   58.30
  -5  -4   1  920.05   57.60
  -5  -4   1  922.46   57.94
   5  -4  -1  895.64   58.28
  -5  -4   1  946.08   57.36
  -5  -4   1  885.56   57.82
   5  -4  -1 1006.50   58.23
   5   4  -1  901.52   57.45
   5   4  -1  984.72   58.12
  -5   4   1  983.26   58.16
  -5   4   1 1005.07   58.31
   5   4  -1  861.93   57.43
  -5   4   1  911.03   58.10
   5   4  -1  919.68   57.62
   4  -4  -1   15.57    1.67
   4  -4  -1   12.03    1.73
  -4  -4   1    9.83    1.40
  -4   4   1   12.89    1.63
   3  -4  -1 3024.64  197.23
  -3   4   1 3127.15  197.12
  -3   4   1 3440.26  197.29
  -3   4   1 3151.03  197.07
  -2  -4   1  136.77    9.38
   2  -4  -1  154.65    9.43
   2  -4  -1  145.97    9.53
  -2   4   1  151.32    9.47
   2   4  -1  131.88    9.01
   2   4  -1  125.65    9.32
  -2   4   1  159.86    9.54
   2   4  -1  135.72    8.95
   2   4  -1  140.08    9.32
  -2   4   1  148.08    9.34
  -1  -4   1   19.60    1.71
  -1  -4   1   21.96    1.86
  -1  -4   1   22.10    1.52
   1  -4  -1   17.80    1.65
   1  -4  -1   18.79    1.59
   1  -4  -1   17.94    1.71
   1   4  -1   19.25    1.72
  -1   4   1   19.90    1.71
  -1   4   1   19.23    1.57
  -1   4   1   19.01    1.74
  -1   4   1   18.46    1.58
   0  -4  -1  745.00   48.26
   0  -4   1  792.95   48.43
   0  -4   1  785.91   48.36
   0  -4  -1  760.62   48.40
   0  -4   1  805.52   48.58
   0  -4   1  755.30   48.41
   0  -4   1  744.17   48.38
   0  -4  -1  746.84   48.19
   0   4   1  821.40   48.30
   0   4  -1  858.45   48.43
   0   4  -1  855.35   48.41
   0   4  -1  740.72   48.44
   0   4  -1  729.33   48.57
   0   4   1  743.98   48.43
  -1  -4  -1   30.21    2.37
   1  -4   1   32.52    2.81
   1  -4   1   30.83    2.60
   1  -4   1   34.48    2.56
  -1  -4  -1   28.26    2.44
   1  -4   1   33.50    2.58
  -1   4  -1   35.69    2.62
  -1   4  -1   32.77    2.55
   1   4   1   32.85    2.37
  -1   4  -1   34.69    2.65
   1   4   1   32.70    2.16
  -1   4  -1   30.71    2.63
   1   4   1   30.62    2.47
  -1   4  -1   34.00    2.55
  -2  -4  -1 4830.11  285.46
  -2  -4  -1 4705.58  285.18
   2  -4   1 4449.04  293.76
   2  -4   1 4401.76  294.72
   2   4   1 4626.19  286.00
  -2   4  -1 4560.76  296.41
  -2   4  -1 4463.53  295.11
   2   4   1 4610.45  285.62
   3  -4   1  696.22   46.97
   3  -4   1  708.30   46.89
   3  -4   1  774.38   46.82
   3  -4   1  763.45   46.82
  -3  -4  -1  776.03   46.62
  -3  -4  -1  750.68   46.23
  -3  -4  -1  779.75   46.60
   3   4   1  751.96   46.62
  -3   4  -1  799.23   46.99
  -3   4  -1  696.09   46.81
  -3   4  -1  710.65   46.78
   4  -4   1  398.21   27.96
   4  -4   1  418.36   27.87
  -4  -4  -1  492.66   27.17
   4  -4   1  382.30   28.02
   4  -4   1  426.90   27.88
  -4  -4  -1  475.82   27.71
  -4  -4  -1  469.97   27.61
  -4   4  -1  375.29   27.80
  -4   4  -1  399.28   27.83
  -4   4  -1  436.56   28.02
   4   4   1  453.62   27.17
   4   4   1  505.20   27.88
  -5  -4  -1  108.36    6.64
  -5  -4  -1  100.57    6.06
  -5  -4  -1  106.38    6.28
   5  -4   1   78.86    6.89
   5  -4   1   81.95    6.68
   5  -4   1   86.77    6.89
  -5   4  -1   89.74    6.85
   5   4   1   88.22    6.03
  -5   4  -1   77.81    6.64
   5   4   1  108.13    6.83
  -5   4  -1   77.19    6.61
   6  -4   1   94.73    6.80
  -6  -4  -1   77.69    5.99
  -6  -4  -1   77.61    5.49
  -6  -4  -1   71.05    5.67
   6  -4   1   98.34    6.66
   6  -4   1   92.21    6.39
   6   4   1   75.73    5.37
  -6   4  -1   87.81    6.45
   6   4   1   76.18    5.52
   6   4   1   75.25    5.31
  -6   4  -1   85.12    6.34
  -6   4  -1   80.92    6.29
  -7  -4  -1  435.12   26.52
  -7  -4  -1  386.91   26.76
   7  -4   1  428.88   27.36
   7  -4   1  457.41   27.64
   7  -4   1  465.83   27.87
   7   4   1  415.66   26.55
  -7   4  -1  412.02   27.34
  -7   4  -1  417.05   27.45
  -7   4  -1  375.31   27.21
   7   4   1  407.05   26.39
   7   4   1  418.57   26.27
   8  -4   1  231.08   16.19
  -8  -4  -1  218.55   15.37
  -8  -4  -1  219.39   15.50
  -8  -4  -1  234.39   15.00
   8  -4   1  230.08   16.02
   8   4   1  225.02   14.88
   8   4   1  235.15   15.08
  -8   4  -1  245.11   16.01
  -8   4  -1  235.25   15.94
  -9  -4  -1   15.41    3.14
  -9  -4  -1   17.38    2.06
   9  -4   1   19.84    2.87
   9  -4   1   23.28    3.75
   9   4   1   15.53    2.01
   9   4   1   14.59    1.88
  -9   4  -1   14.50    2.68
  -9   4  -1   23.51    3.23
   9   4   1   14.26    1.67
 -10  -4  -1   13.43    2.02
  10  -4   1   11.50    2.57
 -10  -4  -1   16.39    2.79
  10  -4   1   12.62    2.91
  10   4   1   14.43    1.64
  10   4   1   13.73    2.15
 -10   4  -1   11.11    2.64
 -10   4  -1   11.45    2.77
  10   4   1   15.41    1.91
 -11  -4  -1   29.73    3.78
  11  -4   1   31.75    4.22
 -11  -4  -1   35.40    3.50
  11  -4   1   32.76    4.30
  11   4   1   31.61    3.41
  11   4   1   36.03    3.20
 -11   4  -1   30.81    4.30
 -11   4  -1   35.10    4.42
  11   4   1   34.48    2.92
  12  -4   1   19.45    3.60
 -12  -4  -1   20.68    2.41
 -12  -4  -1   16.40    3.11
  12  -4   1   15.76    3.41
  12   4   1   16.33    2.16
 -12   4  -1   15.34    4.14
 -12   4  -1   13.01    3.75
  12   4   1   17.54    2.61
  12   4   1   19.20    2.06
  13  -4   1   47.33    5.32
 -13  -4  -1   30.84    4.29
  13  -4   1   41.94    5.04
  13   4   1   32.60    3.35
  13   4   1   36.00    3.88
  13   4   1   37.09    3.30
 -13   4  -1   38.59    4.86
 -13   4  -1   47.75    5.43
 -14  -4  -1   34.13    4.61
  14  -4   1   31.42    4.95
  14  -4   1   31.88    4.74
 -14   4  -1   34.54    4.94
 -14   4  -1   26.27    4.56
  14   4   1   41.49    3.99
  15  -4   1    8.79    3.09
 -15  -4  -1    6.75    2.69
  15  -4   1    9.73    3.22
 -15   4  -1    7.56    3.04
  15   4   1    4.65    1.77
 -15   4  -1   11.47    3.64
 -16  -4  -1    6.16    2.62
  16  -4   1    8.44    3.13
  16  -4   1    9.74    3.21
 -16  -4  -1    2.09    2.24
 -16   4  -1    6.92    3.07
 -16   4  -1    5.13    3.02
  16  -5  -1   56.35    7.06
 -16  -5   1   60.92    6.77
  16  -5  -1   71.19    7.53
 -16   5   1   67.62    7.37
 -16   5   1   59.16    7.29
  15  -5  -1  102.57   10.14
  15  -5  -1  111.55   10.14
 -15  -5   1  121.93    9.99
 -15   5   1  109.02   10.14
 -15   5   1  115.96   10.18
  14  -5  -1   16.21    3.79
 -14  -5   1   11.59    3.09
  14  -5  -1   20.74    4.08
 -14   5   1   15.66    3.69
  14   5  -1   13.12    2.50
 -14   5   1   15.29    3.77
  13  -5  -1   11.80    3.21
 -13  -5   1   13.45    2.06
 -13  -5   1   16.31    3.13
  13  -5  -1    8.63    2.80
 -13   5   1   11.97    3.15
 -13   5   1   11.45    3.18
  13   5  -1   15.66    2.17
  13   5  -1   15.65    2.12
  13   5  -1   16.67    2.42
 -12  -5   1   36.80    4.41
 -12  -5   1   41.18    3.58
  12  -5  -1   41.00    4.89
  12  -5  -1   42.78    5.21
  12   5  -1   38.96    3.56
  12   5  -1   40.39    3.43
 -12   5   1   40.20    5.68
  12   5  -1   42.04    3.88
  11  -5  -1    5.20    2.10
 -11  -5   1    1.97    1.44
  11  -5  -1    7.59    2.46
 -11  -5   1    2.68    1.06
 -11   5   1    8.98    2.39
  11   5  -1    3.26    1.00
  11   5  -1    0.68    1.06
 -11   5   1    6.62    2.27
  11   5  -1    2.41    1.12
  10  -5  -1   31.98    4.69
  10  -5  -1   37.26    4.62
 -10  -5   1   45.29    3.62
 -10  -5   1   49.26    4.51
  10   5  -1   56.43    3.93
  10   5  -1   45.43    3.56
 -10   5   1   40.61    4.71
 -10   5   1   38.68    4.57
  10   5  -1   49.43    3.89
  -9  -5   1  551.34   37.61
  -9  -5   1  593.88   36.68
   9  -5  -1  523.12   37.91
   9  -5  -1  634.94   38.60
   9   5  -1  581.07   36.84
   9   5  -1  589.96   36.86
  -9   5   1  624.98   38.05
  -9   5   1  613.52   38.00
   9   5  -1  544.34   36.60
  -8  -5   1   31.63    3.21
   8  -5  -1   40.22    4.28
   8  -5  -1   38.04    4.00
  -8  -5   1   30.32    3.33
  -8  -5   1   31.38    3.29
  -8  -5   1   32.71    2.67
  -8   5   1   39.39    3.82
   8   5  -1   28.85    2.90
   8   5  -1   33.31    2.80
  -8   5   1   42.07    3.98
   8   5  -1   30.52    2.80
   7  -5  -1    7.52    1.79
  -7  -5   1    2.80    1.02
  -7  -5   1    4.94    1.24
  -7  -5   1    3.29    1.26
  -7  -5   1    4.49    0.78
   7  -5  -1    6.57    1.91
   7  -5  -1    6.84    1.68
  -7   5   1    7.83    1.81
  -7   5   1    8.45    1.96
  -7   5   1    7.75    1.83
   7   5  -1    2.13    0.69
   7   5  -1    2.98    0.74
   7   5  -1    1.29    1.02
   7   5  -1    2.02    0.72
   6  -5  -1 2190.17  139.22
   6  -5  -1 2557.82  141.08
  -6  -5   1 2138.06  138.35
  -6  -5   1 2279.59  138.80
  -6  -5   1 2238.05  138.71
   6  -5  -1 1963.65  139.23
  -6  -5   1 2179.03  138.00
   6   5  -1 2255.59  138.09
   6   5  -1 2147.49  138.89
  -6   5   1 2271.07  139.67
  -6   5   1 2387.21  139.06
   6   5  -1 2184.77  138.10
   6   5  -1 2190.63  138.18
  -6   5   1 2301.31  139.07
  -5  -5   1  304.33   17.10
   5  -5  -1  220.68   17.62
  -5  -5   1  286.76   17.49
   5  -5  -1  251.29   17.58
  -5  -5   1  286.41   17.47
   5  -5  -1  220.29   17.74
  -5   5   1  244.94   17.63
   5   5  -1  315.32   17.69
  -5   5   1  253.44   17.57
   5   5  -1  273.42   16.78
   5   5  -1  249.02   16.84
  -5   5   1  255.95   17.55
   5   5  -1  300.60   16.84
  -4  -5   1  178.22   13.15
   4  -5  -1  204.47   13.59
   4  -5  -1  194.88   13.63
  -4  -5   1  192.21   12.82
  -4  -5   1  185.14   13.16
   4  -5  -1  232.79   13.51
  -4   5   1  229.23   13.43
  -4   5   1  227.16   13.51
   4   5  -1  193.08   13.19
   4   5  -1  183.84   12.56
  -4   5   1  220.83   13.57
   4   5  -1  177.40   12.50
   3  -5  -1   41.10    3.06
   3  -5  -1   37.76    3.00
   3  -5  -1   35.64    3.19
  -3  -5   1   25.90    2.78
   3   5  -1   31.90    2.86
   3   5  -1   37.78    2.37
   3   5  -1   28.04    2.79
  -3   5   1   36.27    3.09
  -3   5   1   38.29    3.01
  -3   5   1   42.31    3.22
   2  -5  -1  297.65   19.96
  -2  -5   1  311.90   19.62
   2  -5  -1  313.38   19.80
  -2  -5   1  303.78   19.85
   2  -5  -1  310.61   19.86
  -2  -5   1  300.35   19.94
   2   5  -1  352.91   19.41
   2   5  -1  287.49   19.84
  -2   5   1  309.33   19.76
  -2   5   1  307.01   19.93
  -2   5   1  297.52   19.92
   2   5  -1  346.00   19.41
   2   5  -1  294.80   19.77
  -1  -5   1   34.01    3.09
   1  -5  -1   45.90    3.17
   1  -5  -1   43.63    3.11
  -1  -5   1   31.49    2.84
   1  -5  -1   44.66    2.99
   1   5  -1   30.86    3.07
   1   5  -1   37.66    3.05
  -1   5   1   47.54    3.26
   1   5  -1   36.25    2.79
   1   5  -1   35.37    2.78
  -1   5   1   46.08    2.93
  -1   5   1   45.68    3.01
   0  -5   1   38.83    3.30
   0  -5  -1   48.09    3.12
   0  -5  -1   45.33    3.25
   0  -5   1   37.11    3.08
   0  -5   1   33.80    3.12
   0  -5  -1   47.42    3.04
   0  -5  -1   48.40    3.18
   0  -5   1   39.42    3.14
   0   5  -1   39.67    3.39
   0   5   1   47.84    3.15
   0   5   1   48.10    3.11
   0   5  -1   39.23    3.12
   0   5  -1   38.85    3.12
   0   5  -1   39.08    3.23
   0   5   1   49.94    3.39
  -1  -5  -1  833.65   54.85
   1  -5   1  850.08   55.26
  -1  -5  -1  885.52   55.23
   1  -5   1  840.55   55.33
  -1  -5  -1  898.74   55.10
   1  -5   1  859.92   55.23
   1  -5   1  912.68   55.39
  -1  -5  -1  828.06   54.87
   1   5   1  926.81   55.26
  -1   5  -1  855.02   55.44
   1   5   1  942.44   54.86
  -1   5  -1  951.52   55.36
  -1   5  -1  881.54   55.27
  -1   5  -1  922.59   55.26
   1   5   1  898.67   55.07
  -2  -5  -1 1310.61   84.31
  -2  -5  -1 1344.22   83.82
   2  -5   1 1339.63   84.49
   2  -5   1 1428.87   84.50
  -2  -5  -1 1365.65   84.22
   2  -5   1 1337.45   84.38
   2  -5   1 1328.87   84.58
   2   5   1 1347.52   84.20
   2   5   1 1362.43   84.15
  -2   5  -1 1380.10   84.42
  -2   5  -1 1390.44   84.40
  -2   5  -1 1277.85   84.52
  -2   5  -1 1426.84   84.55
   3  -5   1 1179.61   79.71
  -3  -5  -1 1296.69   79.37
   3  -5   1 1237.31   79.50
  -3  -5  -1 1414.12   78.95
   3  -5   1 1304.61   79.58
   3  -5   1 1177.03   79.61
  -3  -5  -1 1298.39   79.31
   3   5   1 1291.94   79.30
  -3   5  -1 1221.17   79.63
  -3   5  -1 1313.88   79.71
  -3   5  -1 1293.41   79.58
   4  -5   1  486.19   33.04
   4  -5   1  486.89   33.17
   4  -5   1  535.29   32.97
  -4  -5  -1  525.17   32.24
   4  -5   1  553.62   33.01
  -4  -5  -1  484.19   32.60
  -4  -5  -1  500.48   32.64
   4   5   1  493.36   32.70
  -4   5  -1  548.42   33.02
  -4   5  -1  549.05   33.16
  -4   5  -1  529.27   33.06
   5  -5   1  504.38   33.62
  -5  -5  -1  491.28   32.57
  -5  -5  -1  513.39   32.31
  -5  -5  -1  525.93   33.03
   5  -5   1  532.27   33.37
  -5  -5  -1  511.53   32.93
   5  -5   1  518.04   33.50
   5   5   1  541.43   33.20
  -5   5  -1  532.92   33.49
  -5   5  -1  506.74   33.35
  -5   5  -1  553.92   33.41
  -6  -5  -1 1501.97   98.98
   6  -5   1 1641.84  100.08
  -6  -5  -1 1657.63   99.44
  -6  -5  -1 1624.90   99.29
   6  -5   1 1621.30   99.79
  -6  -5  -1 1579.99   98.68
   6  -5   1 1587.20  100.81
   6   5   1 1505.60   99.55
  -6   5  -1 1637.29   99.93
  -6   5  -1 1766.77   99.91
   6   5   1 1541.59   98.73
  -6   5  -1 1483.15   99.75
  -7  -5  -1    3.96    1.19
  -7  -5  -1    3.93    1.13
  -7  -5  -1    4.70    1.27
  -7  -5  -1    3.96    0.77
   7  -5   1    4.82    1.41
   7  -5   1    3.32    1.39
   7  -5   1    1.77    1.35
  -7   5  -1    4.04    1.54
  -7   5  -1    3.64    1.45
   7   5   1    3.32    0.83
  -7   5  -1    2.55    1.42
  -8  -5  -1   49.18    4.34
  -8  -5  -1   55.21    3.88
  -8  -5  -1   51.10    4.49
   8   5   1   47.97    3.71
   8   5   1   47.18    3.49
  -8   5  -1   68.32    5.30
   8   5   1   55.22    3.99
   9  -5   1    2.71    1.69
  -9  -5  -1    0.54    0.74
   9  -5   1    2.20    1.78
  -9  -5  -1    0.68    1.89
  -9   5  -1    0.63    1.45
   9   5   1    0.86    0.56
   9   5   1    1.05    0.84
  -9   5  -1    2.55    1.70
   9   5   1    1.33    0.66
  10  -5   1  221.70   18.05
  10  -5   1  222.41   17.90
 -10  -5  -1  258.59   16.73
 -10  -5  -1  265.79   17.56
  10   5   1  272.72   16.43
  10   5   1  277.73   16.38
 -10   5  -1  232.78   17.88
 -10   5  -1  269.85   18.18
  10   5   1  276.34   16.96
  11  -5   1   25.64    3.71
  11  -5   1   23.20    3.88
 -11  -5  -1   21.13    3.13
 -11  -5  -1   18.98    2.22
  11   5   1   19.64    2.05
  11   5   1   21.70    2.44
  11   5   1   20.05    1.93
 -11   5  -1   22.52    3.80
 -11   5  -1   18.90    3.38
 -12  -5  -1   99.07    8.35
  12  -5   1   94.51   11.11
  12  -5   1  104.92    9.96
 -12  -5  -1   97.29    7.28
 -12   5  -1  108.36    8.98
  12   5   1  102.34    7.23
  12   5   1  106.01    6.89
 -12   5  -1   92.16    8.58
  12   5   1  102.55    7.59
  13  -5   1  154.51   12.55
  13  -5   1  157.51   12.80
 -13  -5  -1  141.07   10.88
 -13  -5  -1  152.83   12.02
 -13   5  -1  173.25   12.83
 -13   5  -1  148.86   12.47
  13   5   1  174.42   11.27
 -14  -5  -1   24.44    4.14
  14  -5   1   20.68    4.19
  14  -5   1   22.61    4.57
 -14   5  -1   19.88    3.96
 -14   5  -1   23.58    4.49
  15  -5   1   67.96    7.35
  15  -5   1   69.12    7.21
 -15  -5  -1   56.06    6.50
 -15   5  -1   62.13    7.13
 -15   5  -1   63.11    7.22
  16  -5   1   13.91    3.68
 -16  -5  -1    4.21    2.81
 -16   5  -1   15.53    3.96
 -16   5  -1    8.77    3.08
  16  -6  -1    2.68    4.30
 -16  -6   1   -1.43    1.92
 -16   6   1    1.20    2.45
 -16   6   1   -0.12    2.22
  16   6  -1    0.72    1.91
  15  -6  -1    5.05    2.69
 -15  -6   1    5.67    2.56
  15  -6  -1    8.05    3.10
 -15   6   1    5.80    2.91
 -15   6   1    5.39    2.67
  14  -6  -1   15.00    3.87
  14  -6  -1   14.45    3.82
 -14  -6   1   12.44    3.21
 -14   6   1   13.87    3.43
 -14   6   1   15.56    3.84
  13  -6  -1    9.45    3.25
 -13  -6   1   12.58    2.04
 -13  -6   1   10.90    2.80
  13  -6  -1   13.43    3.45
  13   6  -1   16.25    2.24
 -13   6   1   10.01    2.93
 -13   6   1    9.67    2.81
  12  -6  -1   77.98    7.74
  12  -6  -1   69.62    7.62
 -12  -6   1   84.73    7.14
 -12  -6   1   77.47    5.92
 -12   6   1   91.76    7.88
  12   6  -1   83.62    5.65
  12   6  -1   85.57    6.46
 -12   6   1   72.77    7.36
  12   6  -1   84.71    6.19
  11  -6  -1    8.81    2.71
 -11  -6   1    9.49    2.32
  11  -6  -1    5.21    2.33
 -11  -6   1   10.20    1.53
  11   6  -1   13.43    1.46
 -11   6   1    6.87    2.40
  11   6  -1   11.56    1.74
  11   6  -1   10.90    1.74
 -11   6   1    9.72    2.84
  10  -6  -1  140.41   11.62
 -10  -6   1  149.86   10.04
 -10  -6   1  149.55   10.90
  10  -6  -1  137.28   11.81
  10   6  -1  157.45    9.90
  10   6  -1  154.06   10.23
 -10   6   1  169.85   11.78
 -10   6   1  140.90   11.40
  10   6  -1  158.17    9.96
   9  -6  -1  128.29   10.19
   9  -6  -1  124.34    9.88
  -9  -6   1  121.46   10.35
  -9  -6   1  131.29    8.28
  -9   6   1  135.40    9.80
   9   6  -1  116.01    8.12
  -9   6   1  126.13    9.66
   9   6  -1  122.51    8.20
   9   6  -1  118.55    8.36
  -8  -6   1 2345.35  148.71
  -8  -6   1 2303.44  148.38
   8  -6  -1 2538.42  149.56
   8  -6  -1 2494.01  149.78
  -8  -6   1 2377.88  147.95
  -8   6   1 2468.83  149.20
   8   6  -1 2246.20  147.71
  -8   6   1 2547.30  149.29
   8   6  -1 2344.55  149.06
   8   6  -1 2276.50  147.75
   8   6  -1 2366.09  147.91
  -7  -6   1    2.88    0.97
   7  -6  -1   10.80    2.49
  -7  -6   1    4.19    1.33
  -7  -6   1    4.75    1.47
   7   6  -1    4.63    2.36
   7   6  -1    2.12    0.61
   7   6  -1    1.50    0.49
   6  -6  -1    0.66    2.42
  -6  -6   1    5.13    1.36
  -6  -6   1    5.16    1.08
  -6  -6   1    3.57    1.15
   6  -6  -1    3.51    1.63
   6  -6  -1    3.70    1.29
   6   6  -1    3.85    1.28
  -6   6   1    3.09    1.25
  -6   6   1    3.66    1.38
   6   6  -1    4.90    0.67
  -5  -6   1  232.90   17.02
   5  -6  -1  303.59   17.93
   5  -6  -1  252.25   17.92
  -5  -6   1  262.14   17.57
  -5  -6   1  253.72   17.56
   5  -6  -1  261.46   18.13
  -5   6   1  298.91   17.96
  -5   6   1  289.65   17.79
  -5   6   1  280.24   17.93
   5   6  -1  252.24   17.54
   4  -6  -1  136.13    9.75
   4  -6  -1  129.53    9.57
  -4  -6   1  102.64    9.08
   4  -6  -1  139.12    9.41
   4  -6  -1  143.03    9.43
  -4   6   1  141.70    9.39
  -4   6   1  144.90    9.59
  -4   6   1  146.27    9.56
  -3  -6   1 4586.63  271.96
   3  -6  -1 4341.15  271.90
   3  -6  -1 4183.19  272.10
   3  -6  -1 4275.40  271.93
  -3  -6   1 4423.12  272.02
   3  -6  -1 4338.84  272.22
  -3   6   1 4629.88  272.12
  -2  -6   1  224.32   12.39
   2  -6  -1  174.15   12.66
   2  -6  -1  187.97   12.47
  -2  -6   1  192.73   12.58
   2  -6  -1  176.85   12.64
  -2  -6   1  204.81   12.76
   2  -6  -1  183.25   12.54
   2   6  -1  188.74   12.50
  -2   6   1  192.17   12.72
  -2   6   1  197.07   12.66
   2   6  -1  206.80   12.73
  -2   6   1  178.13   12.41
  -2   6   1  173.93   12.36
  -1  -6   1  257.73   16.95
   1  -6  -1  268.32   16.85
  -1  -6   1  259.84   17.11
   1  -6  -1  259.75   16.97
   1  -6  -1  265.44   16.99
   1  -6  -1  274.92   17.03
  -1  -6   1  238.21   16.76
  -1  -6   1  238.19   16.63
  -1   6   1  284.57   16.97
   1   6  -1  259.82   16.97
   1   6  -1  266.83   17.18
  -1   6   1  272.89   17.13
   1   6  -1  266.58   16.71
  -1   6   1  274.54   16.88
   0  -6  -1    2.83    0.72
   0  -6  -1    4.74    0.77
   0  -6  -1    2.83    0.76
   0  -6  -1    3.54    0.73
   0  -6  -1    2.82    0.71
   0   6   1    5.37    0.83
   0   6   1    4.46    0.84
   0   6   1    2.55    0.86
   1  -6   1  176.82   11.94
  -1  -6  -1  184.74   11.78
   1  -6   1  177.29   12.03
  -1  -6  -1  175.95   11.56
  -1  -6  -1  169.01   11.88
   1  -6   1  175.36   11.90
   1  -6   1  179.32   12.04
  -1   6  -1  186.27   12.00
   1   6   1  183.36   11.96
   1   6   1  172.61   11.49
  -1   6  -1  196.22   11.93
  -1   6  -1  193.34   12.02
   1   6   1  180.05   11.72
  -1   6  -1  189.16   12.24
   2  -6   1 1222.86   85.34
  -2  -6  -1 1483.67   84.79
   2  -6   1 1332.95   85.39
  -2  -6  -1 1405.89   85.17
   2  -6   1 1290.68   85.28
  -2  -6  -1 1494.81   84.64
  -2  -6  -1 1414.11   85.31
   2  -6   1 1269.33   85.47
  -2   6  -1 1369.43   85.58
  -2   6  -1 1329.98   85.30
   2   6   1 1404.78   85.21
  -2   6  -1 1363.78   85.32
   2   6   1 1468.19   84.61
   2   6   1 1341.90   85.05
  -2   6  -1 1354.74   85.44
  -3  -6  -1 1012.22   61.54
   3  -6   1  883.04   61.81
  -3  -6  -1 1012.04   61.43
  -3  -6  -1 1075.84   61.02
   3  -6   1  949.01   61.61
   3  -6   1  910.47   61.73
   3  -6   1  950.85   61.64
   3   6   1 1004.51   61.35
   3   6   1 1020.12   61.38
  -3   6  -1  944.86   61.80
  -3   6  -1 1022.65   61.71
  -3   6  -1 1018.31   61.84
   4  -6   1  769.84   49.81
  -4  -6  -1  904.68   49.15
  -4  -6  -1  848.99   49.69
   4  -6   1  681.70   49.86
   4  -6   1  763.53   49.83
  -4  -6  -1  834.44   49.62
   4  -6   1  690.50   49.99
   4   6   1  844.29   49.65
  -4   6  -1  768.67   49.97
  -4   6  -1  773.68   49.98
  -4   6  -1  801.71   49.90
  -5  -6  -1   21.35    1.93
   5  -6   1   18.83    2.80
   5  -6   1   23.28    2.86
  -5  -6  -1   23.75    2.37
  -5  -6  -1   23.81    2.40
  -5   6  -1   26.43    2.76
  -5   6  -1   22.55    2.80
   5   6   1   26.16    2.52
  -6  -6  -1   28.79    2.85
   6  -6   1   28.89    3.18
  -6  -6  -1   31.75    2.97
  -6  -6  -1   33.77    2.58
   6  -6   1   23.91    3.38
   6  -6   1   25.10    3.30
  -6   6  -1   27.32    3.16
  -6   6  -1   32.94    3.32
   6   6   1   32.80    3.12
  -6   6  -1   25.88    3.18
  -7  -6  -1   12.18    1.77
  -7  -6  -1   13.52    1.26
  -7  -6  -1   14.95    2.29
  -7  -6  -1   14.61    1.98
  -8  -6  -1  725.89   48.65
  -8  -6  -1  700.90   46.73
  -8  -6  -1  716.18   45.93
   8  -6   1  819.69   48.04
  -8  -6  -1  710.80   46.55
   8  -6   1  765.48   47.66
  -8   6  -1  785.64   47.51
  -8   6  -1  764.29   47.51
   8   6   1  668.54   45.99
   9  -6   1    0.96    1.54
   9  -6   1   -0.28    1.02
  -9  -6  -1    0.14    0.56
  -9  -6  -1    0.51    1.11
   9   6   1    0.89    0.67
  -9   6  -1    1.53    1.51
  -9   6  -1    0.89    1.44
 -10  -6  -1    8.19    1.34
 -10  -6  -1   10.07    2.13
  10  -6   1   12.00    2.91
  10  -6   1   12.47    3.06
 -10   6  -1   13.06    2.69
 -10   6  -1    8.94    2.63
  10   6   1   10.95    1.56
 -11  -6  -1   76.74    6.57
 -11  -6  -1   79.66    5.65
  11  -6   1   74.22    7.34
  11  -6   1   78.81    7.33
  11   6   1   77.20    5.79
 -11   6  -1   80.47    7.35
 -11   6  -1   79.37    7.21
  12  -6   1  261.50   17.46
 -12  -6  -1  211.78   16.21
  12  -6   1  234.85   17.32
 -12  -6  -1  223.21   15.13
 -12   6  -1  236.81   17.11
  12   6   1  225.17   15.37
 -12   6  -1  238.96   17.09
 -13  -6  -1   66.46    6.43
 -13  -6  -1   56.80    5.24
  13  -6   1   80.34    7.70
  13  -6   1   73.64    7.10
 -13   6  -1   69.51    6.97
 -13   6  -1   67.65    7.03
  14  -6   1  163.06   13.88
  14  -6   1  176.56   14.21
 -14  -6  -1  182.06   13.52
 -14   6  -1  182.43   14.16
 -14   6  -1  169.98   13.97
 -15  -6  -1    2.88    2.18
  15  -6   1    1.99    2.58
  15  -6   1   -1.75    1.81
 -15   6  -1    2.50    2.60
 -15   6  -1    2.91    2.31
 -15  -7   1   -0.77    1.81
  15  -7  -1    0.79    2.50
  15  -7  -1   -0.66    2.10
 -15   7   1    0.39    2.22
 -15   7   1    0.99    2.35
  14  -7  -1   25.20    4.76
  14  -7  -1   26.44    5.01
 -14  -7   1   26.25    4.38
 -14   7   1   23.79    4.57
 -14   7   1   25.16    4.41
 -13  -7   1    9.26    2.57
  13  -7  -1    5.48    3.06
  13  -7  -1    9.32    3.27
 -13   7   1   10.86    3.02
 -13   7   1    7.15    2.56
  12  -7  -1    0.73    1.58
 -12  -7   1    1.22    1.55
  12  -7  -1    1.91    2.25
  12   7  -1    0.81    0.90
 -12   7   1    2.59    1.92
 -12   7   1    1.04    1.71
  11  -7  -1    8.15    2.58
 -11  -7   1    7.82    2.02
  11  -7  -1    9.33    2.69
  11   7  -1   10.28    1.52
 -11   7   1    8.33    2.65
 -11   7   1    4.85    2.20
  10  -7  -1  293.47   21.53
 -10  -7   1  316.22   20.63
  10  -7  -1  309.81   21.93
 -10   7   1  318.58   21.47
 -10   7   1  298.37   21.24
  10   7  -1  314.24   19.71
   9  -7  -1   87.45    7.66
  -9  -7   1   78.97    7.02
   9  -7  -1   81.51    7.33
  -9   7   1   77.64    6.87
   9   7  -1   73.66    5.45
  -9   7   1   91.85    7.18
  -8  -7   1  236.45   15.51
  -8  -7   1  235.00   15.96
   8  -7  -1  245.69   16.78
   8  -7  -1  224.42   16.77
  -8   7   1  234.27   16.41
   8   7  -1  257.18   16.40
  -8   7   1  209.21   16.13
   7  -7  -1   19.08    3.19
  -7  -7   1   22.23    2.58
  -7  -7   1   18.72    2.20
   7  -7  -1   13.84    3.06
  -7  -7   1   23.08    2.66
   7   7  -1   19.67    2.65
  -7   7   1   21.43    2.98
  -7   7   1   16.81    2.74
   6  -7  -1  587.42   37.97
  -6  -7   1  630.40   38.28
   6  -7  -1  531.37   38.04
   6  -7  -1  534.74   38.22
  -6  -7   1  616.99   37.81
  -6  -7   1  630.05   37.16
   6   7  -1  570.95   37.71
  -6   7   1  569.95   37.90
  -6   7   1  629.57   38.13
  -6   7   1  604.04   38.09
  -5  -7   1  213.17   12.58
   5  -7  -1  154.14   12.67
  -5  -7   1  205.40   11.86
   5  -7  -1  166.82   12.42
  -5   7   1  150.17   12.21
  -5   7   1  167.41   12.48
  -5   7   1  185.99   12.63
   5   7  -1  201.81   12.39
  -4  -7   1  726.25   49.15
   4  -7  -1  788.51   50.12
  -4  -7   1  783.98   49.67
   4  -7  -1  817.36   49.77
   4  -7  -1  793.25   49.75
   4  -7  -1  734.34   49.90
  -4  -7   1  757.03   49.73
  -4   7   1  850.76   50.00
   4   7  -1  782.66   49.51
  -4   7   1  833.99   49.95
   4   7  -1  774.49   49.53
  -4   7   1  816.33   49.71
   3  -7  -1  675.56   45.47
   3  -7  -1  701.39   45.42
   3  -7  -1  724.82   45.27
  -3  -7   1  682.02   45.30
  -3  -7   1  696.50   45.19
   3  -7  -1  701.85   45.17
  -3  -7   1  733.02   44.86
  -3   7   1  722.70   45.36
   3   7  -1  728.68   45.20
   3   7  -1  721.49   45.09
  -3   7   1  768.81   45.52
   3   7  -1  719.13   44.41
  -3   7   1  748.33   45.17
   2  -7  -1 1776.24  114.24
   2  -7  -1 1802.65  114.47
  -2  -7   1 1775.11  114.50
  -2  -7   1 1886.85  114.09
   2  -7  -1 1846.28  114.56
  -2  -7   1 1684.52  114.28
   2  -7  -1 1763.57  114.35
  -2   7   1 1983.46  114.65
   2   7  -1 1943.00  114.55
  -2   7   1 1874.59  114.17
  -2   7   1 1875.10  114.27
   2   7  -1 1863.90  113.84
   2   7  -1 1830.90  114.30
  -2   7   1 1860.47  114.41
  -1  -7   1   10.03    1.47
  -1  -7   1   12.10    1.46
  -1  -7   1   11.54    1.64
  -1  -7   1   13.00    1.32
   1   7  -1    9.95    1.61
   1   7  -1   16.22    1.43
  -1   7   1   12.57    1.48
   1   7  -1    9.78    1.77
   0  -7   1    7.80    1.28
   0  -7  -1   10.74    1.42
   0  -7   1   10.31    1.36
   0  -7   1   11.86    1.37
   0  -7  -1   10.79    1.36
   0  -7  -1   11.51    1.38
   0  -7   1    7.69    1.44
   0  -7  -1   10.88    1.28
   0  -7   1   10.89    1.43
   0   7   1   10.23    1.37
   0   7  -1   10.23    1.35
   0   7   1   13.59    1.75
   0   7  -1   10.95    1.65
   0   7  -1    9.12    1.68
  -1  -7  -1  203.68   15.24
   1  -7   1  240.62   15.51
   1  -7   1  244.87   15.50
  -1  -7  -1  220.99   14.96
   1  -7   1  250.12   15.40
  -1  -7  -1  223.30   15.13
  -1  -7  -1  225.68   14.91
   1  -7   1  236.80   15.33
   1   7   1  227.22   15.12
  -1   7  -1  260.80   15.50
   1   7   1  221.49   14.86
   1   7   1  229.73   15.39
  -1   7  -1  257.61   15.77
  -1   7  -1  252.98   15.44
   2  -7   1  714.11   45.03
  -2  -7  -1  676.71   44.97
   2  -7   1  678.26   45.20
   2  -7   1  733.72   45.17
   2  -7   1  685.78   45.10
  -2  -7  -1  683.08   44.82
  -2  -7  -1  665.52   44.29
   2   7   1  693.12   44.72
   2   7   1  678.20   44.26
  -2   7  -1  793.79   45.09
  -2   7  -1  768.38   45.43
  -2   7  -1  797.03   45.17
  -2   7  -1  756.78   45.21
   2   7   1  696.45   44.91
  -3  -7  -1    5.97    1.21
   3  -7   1    7.91    1.72
   3  -7   1    6.59    1.34
   3  -7   1    5.33    1.38
   3  -7   1    7.38    1.40
  -3  -7  -1    5.74    1.28
   3   7   1    7.51    1.35
  -3   7  -1   10.28    1.89
  -3   7  -1    9.84    1.71
   3   7   1    5.32    1.18
  -3   7  -1    8.74    1.71
  -3   7  -1    9.52    1.65
   4  -7   1   87.58    6.52
   4  -7   1   78.68    6.77
  -4  -7  -1   88.06    6.39
   4  -7   1   88.93    6.59
   4  -7   1   84.09    6.73
  -4  -7  -1   91.49    6.32
  -4  -7  -1   79.43    5.76
  -4   7  -1   93.21    6.80
  -4   7  -1   98.92    6.89
  -4   7  -1   94.78    6.67
   4   7   1   74.83    6.16
   5  -7   1  190.17   13.17
   5  -7   1  183.67   13.15
  -5  -7  -1  200.15   12.92
  -5  -7  -1  193.80   12.31
  -5  -7  -1  192.22   12.95
   5   7   1  196.90   12.96
  -5   7  -1  186.32   13.19
  -5   7  -1  190.16   13.34
  -5   7  -1  189.21   13.94
   6  -7   1   43.13    4.78
  -6  -7  -1   52.93    4.24
   6  -7   1   42.48    5.81
  -6  -7  -1   49.99    4.22
   6  -7   1   44.41    4.67
  -6  -7  -1   52.95    3.73
  -6   7  -1   56.01    6.44
  -6   7  -1   45.58    4.54
   6   7   1   56.21    4.49
  -6   7  -1   43.54    4.45
   7  -7   1   59.28    6.18
   7  -7   1   61.90    6.38
  -7  -7  -1   82.11    5.91
  -7  -7  -1   85.20    5.40
  -7   7  -1   72.27    6.36
   7   7   1   78.42    6.41
  -7   7  -1   56.70    5.93
   8  -7   1  175.89   13.35
  -8  -7  -1  176.88   12.05
   8  -7   1  192.92   13.35
  -8  -7  -1  181.54   12.44
  -8   7  -1  186.27   13.15
  -8   7  -1  160.71   12.79
  -9  -7  -1  382.85   25.48
  -9  -7  -1  406.13   24.62
   9  -7   1  403.09   26.91
   9  -7   1  395.91   26.68
  -9   7  -1  414.58   26.60
  -9   7  -1  356.22   26.21
  10  -7   1    3.77    1.80
 -10  -7  -1    6.56    1.86
  10  -7   1    5.44    2.29
 -10  -7  -1    7.85    1.02
 -10   7  -1    7.44    2.31
 -10   7  -1    7.02    2.22
 -11  -7  -1   25.72    3.35
 -11  -7  -1   25.54    2.24
  12  -7   1    7.11    2.75
 -12  -7  -1    9.74    2.46
 -12  -7  -1   10.30    1.44
  12  -7   1    8.67    3.08
 -12   7  -1   15.02    3.58
 -12   7  -1    9.49    2.95
  13  -7   1   -1.47    2.01
 -13  -7  -1    4.93    2.03
  13  -7   1    4.76    2.76
 -13   7  -1    3.83    2.24
 -13   7  -1    3.07    2.25
 -14  -7  -1   16.08    3.40
  14  -7   1   16.19    4.15
  14  -7   1   12.83    3.63
 -14   7  -1   11.00    3.38
 -14   7  -1   22.78    4.61
 -15  -7  -1    1.09    2.01
  15  -7   1    0.38    2.62
  15  -7   1    1.94    2.57
 -15   7  -1    3.39    2.88
 -15   7  -1    1.03    4.58
 -15  -8   1    4.51    2.49
 -15   8   1    6.28    3.33
 -15   8   1    7.74    3.16
 -14  -8   1    0.19    1.81
  14  -8  -1   -3.01    1.86
  14  -8  -1    0.82    2.44
 -14   8   1   -1.74    2.06
 -14   8   1   -0.42    2.11
  13  -8  -1   12.19    3.49
  13  -8  -1    8.18    2.81
 -13  -8   1    7.36    2.55
 -13   8   1   12.30    3.32
 -13   8   1    9.79    2.93
  12  -8  -1  132.59   11.24
  12  -8  -1  125.80   10.92
 -12  -8   1  134.63   10.10
 -12   8   1  116.72   10.50
 -12   8   1  135.12   10.88
  11  -8  -1    8.52    2.74
 -11  -8   1    6.96    1.99
  11  -8  -1    5.94    2.18
 -11   8   1    6.59    2.40
  10  -8  -1   39.01    4.91
  10  -8  -1   43.08    4.94
 -10  -8   1   35.08    3.74
 -10   8   1   38.09    4.51
 -10   8   1   30.04    4.19
  -9  -8   1   12.90    2.19
   9  -8  -1   12.81    3.15
   9  -8  -1   20.32    3.57
  -9   8   1   10.64    2.58
  -9   8   1   16.91    3.26
   9   8  -1   14.35    2.80
  -8  -8   1 1086.77   70.41
   8  -8  -1 1140.92   72.04
   8  -8  -1 1197.51   71.93
   8   8  -1 1068.42   71.17
  -8   8   1 1170.94   71.62
  -8   8   1 1097.82   71.30
  -7  -8   1   50.45    3.94
   7  -8  -1   38.93    4.82
  -7  -8   1   56.03    4.65
   7  -8  -1   43.13    4.91
  -7  -8   1   56.78    4.60
  -7   8   1   37.80    4.43
  -7   8   1   47.28    4.74
   7   8  -1   52.21    4.61
  -6  -8   1  135.28    8.68
  -6  -8   1  129.74    9.39
   6  -8  -1  125.66    9.94
  -6  -8   1  128.44    9.27
   6  -8  -1  118.92    9.65
  -6   8   1  127.62    9.38
   6   8  -1  119.34    9.20
  -6   8   1  135.04    9.66
   5  -8  -1  324.88   20.38
   5  -8  -1  288.63   21.22
  -5  -8   1  300.11   19.55
   5  -8  -1  290.95   20.47
  -5  -8   1  294.99   20.12
  -5  -8   1  293.89   20.22
  -5   8   1  335.26   20.56
  -5   8   1  312.23   20.23
  -5   8   1  318.35   20.53
   5   8  -1  300.08   20.03
  -4  -8   1    0.66    0.89
   4  -8  -1   -0.19    0.64
  -4  -8   1    1.05    0.73
   4  -8  -1   -0.61    0.80
   4  -8  -1   -0.14    0.98
  -4  -8   1    1.94    0.95
  -4   8   1    0.69    1.02
   4   8  -1    2.91    1.12
  -4   8   1   -0.10    0.68
   4   8  -1    0.61    0.67
  -4   8   1    0.00    1.13
   3  -8  -1   84.33    5.99
  -3  -8   1   69.69    5.57
   3  -8  -1   74.17    5.53
   3  -8  -1   71.85    5.67
  -3  -8   1   63.78    5.05
  -3  -8   1   68.06    5.45
   3  -8  -1   80.15    5.52
   3   8  -1   72.25    4.64
  -3   8   1   71.29    5.35
  -3   8   1   67.01    5.33
   3   8  -1   62.69    5.23
  -3   8   1   74.63    5.79
   3   8  -1   63.87    5.42
  -3   8   1   76.68    5.61
   2  -8  -1 1154.52   75.06
   2  -8  -1 1181.16   74.87
   2  -8  -1 1172.49   75.00
   2  -8  -1 1268.87   75.25
  -2  -8   1 1211.05   75.00
  -2  -8   1 1183.85   75.17
  -2  -8   1 1096.95   74.63
  -2   8   1 1200.26   74.89
   2   8  -1 1291.81   75.25
  -2   8   1 1219.47   74.75
   2   8  -1 1195.87   74.43
  -2   8   1 1249.50   75.30
  -2   8   1 1167.95   74.98
   2   8  -1 1209.03   74.95
   1  -8  -1   67.39    4.97
  -1  -8   1   64.13    5.08
   1  -8  -1   71.75    5.20
  -1  -8   1   61.03    4.75
   1  -8  -1   75.02    5.26
  -1  -8   1   64.25    4.98
  -1  -8   1   66.25    4.99
  -1  -8   1   62.39    5.25
   1  -8  -1   67.47    5.18
  -1   8   1   73.29    5.12
  -1   8   1   75.25    5.50
   1   8  -1   72.00    5.50
  -1   8   1   67.87    5.07
   1   8  -1   69.13    5.18
   0  -8  -1  605.62   39.00
   0  -8   1  664.82   39.34
   0  -8  -1  602.56   39.12
   0  -8  -1  638.64   39.09
   0  -8   1  609.15   39.21
   0  -8   1  598.42   39.18
   0  -8   1  611.43   39.46
   0  -8  -1  599.42   39.03
   0  -8   1  674.17   39.19
   0  -8  -1  581.11   39.25
   0   8  -1  636.32   39.17
   0   8   1  596.92   39.12
   0   8  -1  630.14   39.36
   0   8   1  636.07   39.51
   0   8  -1  660.84   39.74
   0   8   1  606.75   39.01
   1  -8   1   20.16    2.29
  -1  -8  -1   20.31    1.77
  -1  -8  -1   22.28    1.92
  -1  -8  -1   19.62    2.13
   1  -8   1   17.93    2.24
   1  -8   1   17.48    2.03
   1  -8   1   20.72    2.21
  -1  -8  -1   20.89    1.97
  -1   8  -1   20.42    2.17
   1   8   1   18.26    2.22
   1   8   1   18.81    1.98
   1   8   1   19.11    1.69
  -1   8  -1   17.05    2.42
  -1   8  -1   14.79    2.11
   2  -8   1 2877.23  188.37
   2  -8   1 3044.20  188.31
  -2  -8  -1 2989.15  187.76
  -2  -8  -1 2939.77  187.56
   2  -8   1 2933.80  188.51
   2  -8   1 3007.15  188.43
  -2  -8  -1 3096.97  188.13
  -2  -8  -1 2947.65  188.26
  -2   8  -1 2958.44  188.38
   2   8   1 3018.88  188.00
  -2   8  -1 3125.70  188.39
  -2   8  -1 3199.45  188.31
   2   8   1 2975.88  187.50
   2   8   1 3134.83  188.28
  -2   8  -1 3321.69  188.84
   3  -8   1   69.18    5.04
   3  -8   1   66.46    5.35
   3  -8   1   65.74    5.20
  -3  -8  -1   51.86    4.25
   3  -8   1   65.31    5.08
  -3  -8  -1   61.54    4.76
  -3  -8  -1   55.03    4.81
  -3   8  -1   75.80    5.50
  -3   8  -1   64.81    5.01
   3   8   1   50.78    4.54
  -3   8  -1   68.79    5.06
   3   8   1   54.65    4.67
  -3   8  -1   73.95    5.30
   4  -8   1 1273.27   82.96
   4  -8   1 1295.21   82.82
  -4  -8  -1 1435.91   82.65
  -4  -8  -1 1431.89   82.05
   4  -8   1 1264.68   83.11
  -4  -8  -1 1378.07   82.71
   4  -8   1 1379.41   82.87
  -4   8  -1 1339.69   83.01
   4   8   1 1264.06   82.40
  -4   8  -1 1273.42   82.76
   4   8   1 1282.17   82.35
  -4   8  -1 1240.52   82.70
   5  -8   1  104.27    8.65
  -5  -8  -1  117.53    7.47
  -5  -8  -1  116.02    8.06
   5  -8   1   99.88    8.45
   5  -8   1  116.91    8.38
   5  -8   1  105.01    8.24
  -5  -8  -1  114.97    8.16
  -5   8  -1  132.62    8.86
   5   8   1   97.75    7.91
  -5   8  -1  113.62    8.56
  -5   8  -1  110.93    8.89
   6  -8   1    1.22    1.25
  -6  -8  -1    1.12    1.18
  -6  -8  -1    0.56    1.09
  -6  -8  -1    1.18    0.73
   6  -8   1    0.69    1.40
   6   8   1    1.27    1.07
  -6   8  -1    2.06    1.54
  -6   8  -1    1.31    1.30
   7  -8   1  519.77   34.14
  -7  -8  -1  488.70   33.41
  -7  -8  -1  510.25   33.45
   7  -8   1  536.15   34.42
  -7  -8  -1  496.49   32.78
  -7   8  -1  504.31   33.85
   7   8   1  510.01   33.58
  -7   8  -1  600.47   34.39
   8  -8   1  141.72   10.82
  -8  -8  -1  126.65    9.41
   8  -8   1  147.06   11.06
  -8  -8  -1  131.10    9.98
  -8   8  -1  155.38   10.92
  -8   8  -1  131.21   10.38
   9  -8   1   53.21    5.69
  -9  -8  -1   50.99    4.37
   9  -8   1   51.10    5.48
  -9   8  -1   43.58    5.01
  -9   8  -1   53.49    5.48
 -10  -8  -1    7.24    1.81
  10  -8   1    6.57    2.41
  10  -8   1   10.79    3.00
 -10   8  -1    6.60    2.13
 -10   8  -1    5.29    2.21
 -11  -8  -1    8.06    2.16
  11  -8   1    5.99    2.42
  11  -8   1    5.97    2.65
 -11   8  -1   11.81    3.07
 -11   8  -1    8.87    2.75
  12  -8   1  222.24   17.24
 -12  -8  -1  235.86   16.34
  12  -8   1  231.47   17.58
 -12   8  -1  209.25   16.99
 -12   8  -1  260.80   17.63
  13  -8   1    4.79    2.69
  13  -8   1    1.00    2.05
 -13  -8  -1    3.04    1.87
 -13   8  -1   -0.96    2.00
 -13   8  -1    3.16    2.38
  14  -8   1  117.87   10.54
  14  -8   1  110.37   10.57
 -14  -8  -1  102.60    9.15
 -14   8  -1  108.56   10.08
 -14   8  -1  116.82   10.47
  15  -8   1    1.55    3.38
 -15  -8  -1   -1.03    1.72
  15  -8   1   -0.41    2.62
 -15   8  -1    4.54    2.53
 -15   8  -1    3.19    2.79
  15  -9  -1   26.69    5.56
  15  -9  -1   23.29    5.01
 -15  -9   1   34.43    4.56
 -15   9   1   24.24    5.07
 -15   9   1   20.93    4.84
  14  -9  -1   29.16    5.53
 -14  -9   1   31.02    4.15
  14  -9  -1   31.89    5.36
 -14   9   1   17.59    4.28
 -14   9   1   26.50    5.12
  13  -9  -1    9.63    3.57
 -13  -9   1    4.77    2.00
  13  -9  -1   12.83    3.75
 -13   9   1    8.44    2.96
 -13   9   1   11.60    3.44
  12  -9  -1   43.60    5.87
  12  -9  -1   46.67    6.10
 -12  -9   1   53.19    5.13
 -12   9   1   45.56    5.62
 -12   9   1   52.85    5.94
  11  -9  -1   33.89    4.70
  11  -9  -1   39.35    5.33
 -11   9   1   46.98    5.11
 -11   9   1   32.61    4.71
  10  -9  -1    0.17    1.51
  10  -9  -1   -0.64    1.64
 -10  -9   1    0.34    1.09
 -10   9   1    3.50    1.67
 -10   9   1    0.18    1.40
   9  -9  -1  190.12   14.17
   9  -9  -1  182.18   14.31
  -9  -9   1  178.48   12.70
  -9   9   1  179.61   13.66
   9   9  -1  219.53   13.93
  -9   9   1  177.66   13.84
   8  -9  -1   43.98    5.51
   8  -9  -1   53.98    5.52
  -8  -9   1   63.09    4.49
  -8   9   1   49.94    5.17
  -8   9   1   44.75    5.03
  -7  -9   1   10.06    2.16
   7  -9  -1    3.37    2.09
   7  -9  -1    2.60    1.57
   7   9  -1    9.42    2.13
  -7   9   1    3.17    1.77
  -7   9   1    4.43    1.72
  -6  -9   1  654.21   39.24
   6  -9  -1  577.77   39.71
   6  -9  -1  572.16   39.53
  -6  -9   1  660.54   39.38
  -6  -9   1  627.11   38.41
   6   9  -1  637.99   39.09
  -6   9   1  564.91   39.38
  -6   9   1  581.78   39.13
   5  -9  -1  170.86   12.17
  -5  -9   1  199.06   13.98
   5  -9  -1  151.62   12.28
   5  -9  -1  173.71   12.65
   5  -9  -1  166.70   12.56
   5   9  -1  191.30   12.01
  -5   9   1  159.24   12.27
  -5   9   1  170.65   12.05
  -5   9   1  179.52   12.41
   4  -9  -1   27.17    3.35
   4  -9  -1   30.06    3.02
  -4  -9   1   29.08    3.16
  -4  -9   1   29.12    2.98
   4  -9  -1   30.07    2.98
  -4  -9   1   29.61    2.63
  -4   9   1   26.21    2.84
  -4   9   1   26.59    3.19
   4   9  -1   25.21    2.83
   4   9  -1   26.11    2.84
  -4   9   1   30.64    3.02
  -4   9   1   33.90    3.27
   3  -9  -1   52.54    4.02
  -3  -9   1   41.68    3.85
   3  -9  -1   49.08    4.27
  -3  -9   1   41.43    4.03
  -3  -9   1   43.09    3.56
   3  -9  -1   54.67    4.50
  -3   9   1   47.25    4.04
  -3   9   1   45.94    4.24
   3   9  -1   38.22    3.83
  -3   9   1   46.67    3.82
   3   9  -1   42.93    3.08
  -3   9   1   44.87    3.88
   3   9  -1   42.61    3.77
   2  -9  -1  935.41   58.54
   2  -9  -1  984.00   58.92
  -2  -9   1  981.08   58.68
   2  -9  -1  938.79   58.70
   2  -9  -1  999.32   58.85
  -2  -9   1  895.46   58.32
  -2  -9   1  975.44   58.91
   2   9  -1  884.83   58.54
   2   9  -1  904.66   58.82
  -2   9   1  881.15   58.90
  -2   9   1  939.53   58.66
   2   9  -1  947.54   58.05
  -2   9   1  864.20   58.49
   1  -9  -1  340.07   23.89
   1  -9  -1  351.61   23.92
  -1  -9   1  410.33   23.90
   1  -9  -1  341.54   23.80
  -1  -9   1  385.35   23.83
  -1  -9   1  425.01   24.32
  -1  -9   1  414.66   24.01
  -1  -9   1  378.99   23.56
   1  -9  -1  355.05   23.73
  -1   9   1  367.01   23.79
   1   9  -1  371.51   24.26
  -1   9   1  327.47   23.73
   1   9  -1  368.21   23.93
   1   9  -1  390.50   23.62
  -1   9   1  336.39   24.12
   0  -9   1  116.71    7.81
   0  -9   1  119.76    7.64
   0  -9   1  118.74    7.76
   0  -9  -1   99.40    7.70
   0  -9   1  122.19    8.07
   0  -9   1  118.16    7.74
   0  -9  -1  100.60    7.45
   0  -9  -1  109.04    7.52
   0  -9  -1  106.28    7.45
   0  -9  -1  101.57    7.55
   0   9   1   90.38    7.47
   0   9   1   94.16    7.82
   0   9  -1  117.31    7.65
   0   9  -1  103.20    7.76
   0   9   1  105.69    7.43
   0   9  -1  118.84    8.27
  -1  -9  -1  106.75    7.26
   1  -9   1  120.19    7.99
  -1  -9  -1  109.17    7.51
   1  -9   1  111.86    7.94
  -1  -9  -1  107.28    7.38
   1  -9   1  104.16    7.66
  -1  -9  -1  115.79    7.81
   1  -9   1  119.57    7.83
  -1  -9  -1  111.15    7.43
  -1   9  -1  115.66    7.78
  -1   9  -1  100.54    8.07
  -1   9  -1  103.71    7.77
   1   9   1   96.56    7.75
   1   9   1   89.06    7.38
   2  -9   1 1160.91   67.64
   2  -9   1 1157.56   67.81
  -2  -9  -1 1057.93   67.43
  -2  -9  -1 1102.90   67.25
  -2  -9  -1 1059.61   66.90
  -2  -9  -1 1047.96   66.65
   2  -9   1 1131.58   67.50
   2   9   1 1010.58   67.37
  -2   9  -1 1041.34   67.85
   2   9   1 1056.32   67.11
  -2   9  -1 1057.77   67.51
   2   9   1 1046.28   66.59
  -2   9  -1 1096.48   67.56
  -2   9  -1 1029.94   67.30
  -3  -9  -1  531.35   33.22
  -3  -9  -1  508.64   32.71
   3  -9   1  526.65   33.52
  -3  -9  -1  532.76   33.41
   3  -9   1  503.36   33.56
   3  -9   1  529.51   33.47
   3  -9   1  507.44   33.72
  -3   9  -1  508.35   33.42
   3   9   1  533.08   33.07
  -3   9  -1  527.10   33.36
  -3   9  -1  549.28   34.23
   3   9   1  500.72   33.15
  -4  -9  -1   25.61    2.83
  -4  -9  -1   28.09    2.33
   4  -9   1   25.49    2.89
   4  -9   1   25.83    3.30
   4  -9   1   26.16    2.95
  -4  -9  -1   24.61    2.72
   4  -9   1   25.92    3.19
  -4   9  -1   26.10    2.91
  -4   9  -1   27.84    3.05
   4   9   1   26.62    2.70
   4   9   1   30.58    2.82
  -4   9  -1   27.69    3.10
  -4   9  -1   28.68    3.28
  -5  -9  -1  955.60   59.86
  -5  -9  -1 1004.35   60.61
   5  -9   1  903.27   61.17
  -5  -9  -1 1014.05   60.73
   5  -9   1  859.17   60.91
  -5   9  -1  968.16   60.80
  -5   9  -1  937.69   60.80
  -5   9  -1 1008.72   61.29
   5   9   1  999.06   60.52
   6  -9   1   91.96    8.17
  -6  -9  -1  109.48    7.02
   6  -9   1   94.13    8.38
  -6  -9  -1  110.82    7.79
   6   9   1  115.41    7.87
  -6   9  -1   97.47    7.98
  -6   9  -1   92.34    8.13
  -7  -9  -1    8.81    2.01
  -7  -9  -1    9.76    2.12
   7  -9   1    7.96    2.41
   7  -9   1    7.44    2.40
  -7  -9  -1    8.98    1.54
  -7   9  -1   10.66    2.62
  -7   9  -1    8.97    2.32
   7   9   1    7.64    2.08
   8  -9   1    2.33    2.02
  -8  -9  -1    1.31    1.01
   8  -9   1    1.88    1.83
  -8   9  -1    2.01    1.59
  -8   9  -1    3.06    2.20
   8   9   1    0.89    1.48
   9  -9   1   22.39    3.84
  -9  -9  -1   15.06    2.33
   9  -9   1   24.37    3.93
  -9   9  -1   15.89    3.28
  -9   9  -1   17.49    3.34
  10  -9   1    0.62    2.09
 -10  -9  -1    1.75    1.32
  10  -9   1    2.40    2.60
 -10   9  -1    2.38    3.50
 -10   9  -1    2.13    1.78
  11  -9   1   48.00    6.25
 -11  -9  -1   67.61    5.58
  11  -9   1   53.54    6.36
 -11   9  -1   60.77    6.43
 -11   9  -1   61.00    6.51
  12  -9   1    3.09    2.62
 -12  -9  -1    5.94    2.09
  12  -9   1    8.79    3.16
 -12   9  -1    4.67    2.54
 -12   9  -1    7.17    2.46
  13  -9   1    0.99    2.25
  13  -9   1    0.74    2.39
 -13  -9  -1    1.53    1.79
 -13   9  -1    0.93    2.30
 -13   9  -1   -1.09    1.92
  14  -9   1   15.25    3.96
  14  -9   1   14.65    3.89
 -14  -9  -1   10.81    2.71
 -14   9  -1   10.22    3.53
 -14   9  -1    5.54    2.76
 -14 -10   1    1.51    2.05
 -14  10   1   -1.29    2.26
 -13 -10   1   36.94    5.37
  13 -10  -1   48.13    6.14
  13 -10  -1   45.44    6.11
 -13  10   1   52.12    6.01
 -13  10   1   47.79    5.98
  12 -10  -1   50.54    6.11
 -12 -10   1   33.49    4.32
  12 -10  -1   39.21    5.55
 -12  10   1   45.37    5.57
 -12  10   1   45.14    5.54
  11 -10  -1   60.81    6.89
 -11 -10   1   70.15    5.96
  11 -10  -1   70.46    7.33
 -11  10   1   59.77    6.87
 -11  10   1   74.95    6.96
 -10 -10   1    7.99    2.02
  10 -10  -1    9.79    2.89
  10 -10  -1    9.89    3.01
 -10  10   1    9.72    2.56
 -10  10   1    5.71    2.43
   9 -10  -1   15.87    3.61
  -9 -10   1   15.92    2.41
   9 -10  -1   17.13    3.48
  -9  10   1   15.39    3.15
  -9  10   1   13.46    3.23
   9  10  -1   21.86    3.55
  -8 -10   1   59.47    5.02
   8 -10  -1   66.43    6.66
   8 -10  -1   66.88    6.30
  -8  10   1   72.87    6.25
  -8  10   1   63.45    6.27
   8  10  -1   63.44    5.97
   7 -10  -1    1.98    1.70
   7 -10  -1    1.86    1.86
  -7 -10   1    4.19    1.24
  -7  10   1    3.72    1.70
  -7  10   1    3.38    1.70
   7  10  -1    2.64    1.57
   6 -10  -1   49.23    5.31
  -6 -10   1   54.34    4.80
  -6 -10   1   56.70    4.97
  -6 -10   1   53.97    4.07
   6 -10  -1   44.37    4.97
  -6  10   1   50.04    4.78
   6  10  -1   49.14    4.58
  -6  10   1   40.56    4.75
  -5 -10   1    4.77    1.51
   5 -10  -1    9.07    2.25
  -5 -10   1    4.80    1.24
  -5 -10   1    4.86    1.66
   5 -10  -1    4.77    1.94
  -5  10   1    5.52    1.87
   5  10  -1    5.48    1.54
  -5  10   1    4.38    1.55
   4 -10  -1  105.68    8.14
  -4 -10   1  104.01    7.67
   4 -10  -1  101.47    7.92
  -4 -10   1  105.65    7.19
   4 -10  -1  103.45    7.74
  -4 -10   1  100.69    7.77
   4 -10  -1   93.29    7.50
   4  10  -1   88.21    7.43
   4  10  -1  107.50    7.51
  -4  10   1  103.85    7.79
  -4  10   1   94.21    7.48
  -4  10   1  102.39    7.51
  -4  10   1  104.07    8.05
   3 -10  -1   15.55    2.50
  -3 -10   1   23.20    2.52
   3 -10  -1   16.39    2.55
   3 -10  -1   14.59    2.11
   3 -10  -1   14.53    2.15
  -3  10   1   17.08    2.16
  -3  10   1   15.71    2.24
  -3  10   1   13.15    2.52
  -3  10   1   18.23    2.18
  -2 -10   1  851.69   51.93
  -2 -10   1  827.12   51.56
   2 -10  -1  826.05   51.50
   2 -10  -1  791.61   51.77
  -2 -10   1  861.50   51.36
   2 -10  -1  817.12   51.68
   2 -10  -1  830.51   51.72
  -2  10   1  790.92   51.95
   2  10  -1  801.15   51.82
   2  10  -1  801.33   51.53
   2  10  -1  757.90   51.67
  -2  10   1  802.23   51.54
  -2  10   1  858.35   51.60
  -1 -10   1   77.28    5.14
   1 -10  -1   48.82    4.93
  -1 -10   1   81.41    5.87
   1 -10  -1   51.93    4.95
  -1 -10   1   77.14    4.84
   1 -10  -1   57.43    4.87
   1  10  -1   77.42    4.87
  -1  10   1   54.33    4.87
  -1  10   1   51.67    5.23
   1  10  -1   76.16    5.67
  -1  10   1   55.08    4.88
   1  10  -1   63.89    5.13
   0 -10  -1  350.42   22.91
   0 -10   1  351.71   22.79
   0 -10  -1  369.16   22.64
   0 -10  -1  380.12   22.68
   0 -10  -1  368.96   22.65
   0 -10   1  341.57   22.64
   0 -10   1  343.76   22.74
   0 -10  -1  374.36   22.81
   0 -10   1  326.54   22.80
   0  10  -1  316.94   22.83
   0  10  -1  339.78   22.66
   0  10  -1  321.85   23.21
   0  10   1  357.05   22.53
   0  10   1  361.53   23.21
   0  10   1  370.60   22.79
   1 -10   1  492.52   34.06
  -1 -10  -1  564.67   33.74
  -1 -10  -1  571.97   33.83
  -1 -10  -1  581.90   33.72
  -1 -10  -1  573.43   33.54
   1 -10   1  493.32   33.88
   1 -10   1  520.99   34.18
  -1 -10  -1  547.24   34.08
   1 -10   1  525.40   33.98
   1  10   1  544.89   33.44
   1  10   1  548.54   33.80
   1  10   1  520.92   34.16
  -1  10  -1  493.89   34.02
  -1  10  -1  504.29   33.92
  -1  10  -1  488.06   34.51
   2 -10   1  608.21   41.07
  -2 -10  -1  664.29   40.72
  -2 -10  -1  648.48   40.16
  -2 -10  -1  660.13   39.86
   2 -10   1  672.39   40.83
   2 -10   1  652.47   40.98
  -2 -10  -1  662.55   40.46
   2 -10   1  606.90   40.76
  -2  10  -1  573.42   41.02
  -2  10  -1  602.17   40.67
   2  10   1  684.11   40.40
   2  10   1  655.68   40.73
  -2  10  -1  607.58   40.70
   2  10   1  640.09   39.77
  -3 -10  -1   36.02    2.70
  -3 -10  -1   34.37    3.11
  -3 -10  -1   35.94    3.28
   3 -10   1   26.64    3.08
   3 -10   1   33.07    5.75
   3 -10   1   25.88    3.03
   3  10   1   36.68    3.22
  -3  10  -1   29.35    3.12
  -3  10  -1   26.49    3.13
  -3  10  -1   28.46    3.22
  -3  10  -1   21.55    3.30
  -4 -10  -1    6.57    1.56
  -4 -10  -1    5.74    1.12
   4 -10   1    3.99    1.61
   4 -10   1    2.66    1.49
  -4 -10  -1    9.62    1.97
  -4  10  -1    3.11    1.39
  -4  10  -1    3.56    1.36
   4  10   1    5.97    1.51
  -4  10  -1    0.52    1.36
   4  10   1    5.44    1.42
  -4  10  -1    2.04    1.26
   5 -10   1   55.89    5.43
  -5 -10  -1   60.64    4.33
   5 -10   1   57.58    5.62
  -5 -10  -1   58.38    5.00
  -5  10  -1   50.60    5.04
   5  10   1   63.46    4.98
  -5  10  -1   55.70    5.47
  -5  10  -1   57.59    5.18
  -6 -10  -1  268.42   15.78
   6 -10   1  229.08   17.04
  -6 -10  -1  263.42   16.62
   6 -10   1  225.68   17.20
  -6 -10  -1  243.47   16.62
  -6  10  -1  245.59   16.81
   6  10   1  232.73   16.42
  -6  10  -1  228.57   17.12
  -6  10  -1  243.51   16.86
  -7 -10  -1  231.96   15.81
   7 -10   1  210.92   16.43
   7 -10   1  209.29   16.24
  -7 -10  -1  258.11   14.93
  -7  10  -1  198.94   16.11
  -7  10  -1  222.16   16.03
   7  10   1  249.15   15.85
  -8 -10  -1  618.98   37.42
   8 -10   1  576.04   39.18
   8 -10   1  584.28   39.01
  -8  10  -1  566.03   38.89
  -8  10  -1  584.22   38.65
   8  10   1  608.90   38.35
   9 -10   1  113.99   10.00
   9 -10   1  122.80    9.96
  -9  10  -1  108.50    9.65
  -9  10  -1  117.86    9.60
 -10 -10  -1   61.90    5.49
  10 -10   1   66.08    6.89
  10 -10   1   74.35    7.25
 -10  10  -1   70.74    6.87
 -10  10  -1   65.09    6.85
  11 -10   1    1.49    1.78
 -11 -10  -1    0.60    1.34
  11 -10   1    3.58    2.31
 -11  10  -1    4.19    2.27
 -11  10  -1    0.98    2.02
  12 -10   1   15.28    3.92
  12 -10   1    9.44    3.43
 -12 -10  -1   11.45    2.64
 -12  10  -1   13.96    3.53
 -12  10  -1   10.70    3.25
  13 -10   1    6.10    3.22
 -13 -10  -1   11.34    2.66
  13 -10   1   10.26    3.22
 -13  10  -1    7.66    3.28
 -13  10  -1    7.24    2.74
 -14 -10  -1   32.60    4.36
  14 -10   1   27.10    5.65
  14 -10   1   28.82    5.42
 -14  10  -1   31.85    6.55
 -14  10  -1   30.96    5.58
  14 -11  -1    5.05    3.20
  14 -11  -1    7.23    3.29
 -14 -11   1    6.41    2.51
 -14  11   1    5.14    2.92
 -14  11   1    7.25    4.55
  13 -11  -1   15.89    4.30
  13 -11  -1   14.76    4.08
 -13  11   1   14.20    4.04
 -13  11   1   10.85    3.58
  12 -11  -1   21.88    4.67
 -12 -11   1   24.38    3.48
  12 -11  -1   22.11    4.62
 -12  11   1   19.03    4.20
 -12  11   1   19.18    4.04
 -11 -11   1   37.12    3.80
  11 -11  -1   25.03    4.67
  11 -11  -1   27.29    4.98
 -11  11   1   28.45    4.49
 -11  11   1   32.74    5.43
  10 -11  -1   64.85    7.45
 -10 -11   1   78.65    6.03
  10 -11  -1   74.05    7.52
  10  11  -1   82.86    7.05
 -10  11   1   57.60    6.72
  -9 -11   1   47.28    4.41
   9  11  -1   45.18    5.15
  -9  11   1   51.60    6.93
  -9  11   1   60.67    5.68
  -8 -11   1    2.82    1.36
   8 -11  -1    2.36    1.99
   8 -11  -1    2.83    1.96
  -8  11   1    3.35    1.88
  -8  11   1    4.05    2.01
   8  11  -1    3.16    1.84
   7 -11  -1   52.06    6.02
  -7 -11   1   58.24    4.61
   7 -11  -1   56.57    5.79
  -7  11   1   50.08    5.58
   7  11  -1   61.34    5.37
  -7  11   1   64.43    5.66
   6 -11  -1  133.76   10.50
   6 -11  -1  132.72   10.27
  -6 -11   1  116.94    8.93
  -6  11   1  138.26    9.87
  -6  11   1  140.82    9.90
   6  11  -1  117.70    9.51
  -6  11   1  140.79   10.42
  -5 -11   1  773.23   47.65
   5 -11  -1  761.40   48.91
   5 -11  -1  742.11   48.66
  -5 -11   1  766.57   48.54
  -5 -11   1  812.91   48.42
   5  11  -1  750.67   48.05
  -5  11   1  727.29   48.12
  -5  11   1  755.03   48.24
  -5  11   1  706.73   48.68
   5  11  -1  770.22   48.08
  -4 -11   1   96.68    7.71
   4 -11  -1  109.18    8.17
  -4 -11   1  100.15    7.04
  -4 -11   1   90.12    7.38
   4 -11  -1  109.98    7.98
   4  11  -1   87.07    7.37
   4  11  -1   85.78    7.64
  -4  11   1   98.55    7.34
  -4  11   1  101.91    7.99
   3 -11  -1    2.24    1.14
  -3 -11   1    3.52    1.33
   3 -11  -1    0.65    2.10
  -3 -11   1    1.75    0.89
   3 -11  -1    1.85    1.28
  -3  11   1    2.40    1.41
   3  11  -1    2.05    0.61
   3  11  -1    0.71    1.22
   3  11  -1    3.78    1.38
  -3  11   1    3.15    1.15
  -3  11   1    2.46    1.19
  -2 -11   1  219.55   13.53
   2 -11  -1  189.78   13.68
   2 -11  -1  194.00   13.74
  -2 -11   1  220.00   13.61
  -2 -11   1  204.24   13.68
   2 -11  -1  179.85   13.78
   2 -11  -1  199.80   13.88
  -2 -11   1  210.95   14.00
  -2  11   1  195.45   13.63
   2  11  -1  218.32   14.74
  -2  11   1  193.03   14.10
   2  11  -1  204.25   13.69
   2  11  -1  192.02   12.98
  -2  11   1  186.39   13.59
   1 -11  -1  297.53   20.43
  -1 -11   1  316.00   20.01
   1 -11  -1  300.24   20.45
   1 -11  -1  285.89   20.25
  -1 -11   1  330.69   20.34
  -1 -11   1  317.57   20.33
  -1 -11   1  328.45   20.41
  -1 -11   1  324.27   20.73
   1 -11  -1  289.37   20.18
   1  11  -1  327.14   20.53
   1  11  -1  298.71   19.96
  -1  11   1  279.99   20.12
   1  11  -1  344.39   21.14
  -1  11   1  307.69   20.34
   0 -11  -1   41.79    4.14
   0 -11  -1   48.21    4.15
   0 -11   1   47.38    4.16
   0 -11  -1   44.81    3.95
   0 -11   1   46.77    4.26
   0 -11   1   49.28    4.03
   0 -11  -1   49.28    3.97
   0 -11   1   47.67    4.16
   0 -11   1   47.08    4.43
   0  11   1   44.31    3.83
   0  11   1   52.37    4.26
   0  11  -1   50.33    4.75
   0  11  -1   50.38    4.39
   0  11   1   46.81    4.54
   0  11  -1   50.63    4.05
  -1 -11  -1  416.08   28.74
   1 -11   1  475.08   29.64
  -1 -11  -1  441.57   28.97
   1 -11   1  468.05   29.35
  -1 -11  -1  448.23   29.08
  -1 -11  -1  424.01   28.98
   1 -11   1  468.11   29.55
  -1 -11  -1  416.83   29.71
   1 -11   1  479.54   29.60
   1  11   1  462.43   29.62
  -1  11  -1  452.69   29.30
   1  11   1  454.20   29.10
   1  11   1  426.49   28.68
  -1  11  -1  497.01   30.12
  -1  11  -1  504.36   29.63
   2 -11   1   49.30    5.00
  -2 -11  -1   64.49    4.70
  -2 -11  -1   64.75    4.31
  -2 -11  -1   68.88    4.70
   2 -11   1   51.29    4.92
  -2 -11  -1   68.64    5.22
  -2 -11  -1   64.12    4.89
  -2  11  -1   45.28    5.29
  -2  11  -1   57.33    5.12
   2  11   1   61.38    4.84
   2  11   1   58.01    4.15
   2  11   1   63.19    5.23
  -2  11  -1   53.40    5.11
   3 -11   1   22.44    3.00
  -3 -11  -1   18.07    2.41
   3 -11   1   21.09    3.09
  -3 -11  -1   14.72    1.96
  -3  11  -1   23.53    2.93
  -3  11  -1   17.40    3.06
   3  11   1   20.80    2.49
   3  11   1   19.94    2.59
  -3  11  -1   24.28    2.83
  -3  11  -1   18.62    2.90
  -4 -11  -1 1183.34   70.22
  -4 -11  -1 1095.06   70.90
  -4 -11  -1 1109.24   70.71
   4 -11   1 1155.69   71.30
   4 -11   1 1151.66   71.52
   4  11   1 1119.50   70.54
   4  11   1 1083.28   70.59
  -4  11  -1 1130.75   72.83
  -4  11  -1 1150.62   71.10
  -4  11  -1 1074.35   71.49
  -5 -11  -1  475.64   31.18
  -5 -11  -1  509.78   30.40
   5 -11   1  487.31   31.67
  -5 -11  -1  475.72   31.04
   5 -11   1  488.61   31.90
  -5  11  -1  457.88   31.76
  -5  11  -1  485.16   31.29
  -5  11  -1  468.75   31.32
   5  11   1  462.40   30.94
   6 -11   1    8.37    2.53
  -6 -11  -1    9.00    1.50
  -6 -11  -1    7.46    2.05
   6 -11   1    8.60    2.32
  -6 -11  -1    7.16    1.94
  -6  11  -1   11.89    2.50
   6  11   1    4.91    1.78
  -6  11  -1   12.47    2.92
  -6  11  -1   13.84    2.63
   7 -11   1    7.30    2.43
  -7 -11  -1    8.84    1.56
   7 -11   1    7.94    2.64
  -7  11  -1   11.27    2.94
  -7  11  -1    9.47    2.44
  -7  11  -1   10.33    2.54
   7  11   1    5.17    1.78
  -8 -11  -1   31.25    3.07
   8 -11   1   33.83    4.63
   8 -11   1   33.98    4.39
  -8  11  -1   32.76    4.58
   8  11   1   32.10    3.88
  -8  11  -1   41.00    4.56
   9 -11   1   65.68    6.52
  -9 -11  -1   56.37    5.30
   9 -11   1   55.24    6.35
  -9  11  -1   50.12    5.88
  -9  11  -1   54.12    5.85
  10 -11   1    0.34    1.84
 -10 -11  -1   -0.24    1.08
  10 -11   1    1.26    1.97
 -10  11  -1    0.04    1.71
 -10  11  -1    2.97    2.13
  11 -11   1   26.97    4.71
 -11 -11  -1   32.59    3.76
  11 -11   1   26.73    4.99
 -11  11  -1   28.90    4.64
 -11  11  -1   35.62    4.90
  12 -11   1  123.31   11.15
  12 -11   1  129.37   11.45
 -12 -11  -1  129.66    9.84
 -12  11  -1  135.10   11.46
 -12  11  -1  114.90   10.83
  13 -11   1   80.66    9.49
  13 -11   1   77.01    9.41
 -13 -11  -1   75.95    8.49
 -13  11  -1   89.02    8.80
 -13  11  -1   89.17    8.92
  14 -11   1   13.47    4.13
  14 -11   1   16.41    4.40
 -14  11  -1   21.03    4.50
 -14  11  -1   14.91    4.06
  13 -12  -1    4.94    3.76
  13 -12  -1    8.52    3.52
 -13 -12   1    6.55    2.35
 -13  12   1    8.91    3.11
 -12 -12   1    5.43    2.03
  12 -12  -1    1.57    2.39
  12 -12  -1    8.25    2.83
 -12  12   1    5.37    2.55
 -12  12   1    7.76    3.42
  11 -12  -1    2.80    2.67
 -11 -12   1    1.01    1.52
  11 -12  -1    2.62    2.25
 -11  12   1    1.89    2.21
 -11  12   1    3.68    2.53
  10 -12  -1   98.39    9.63
  10 -12  -1  113.22   10.15
 -10 -12   1  113.50    8.20
  10  12  -1  109.21    9.14
 -10  12   1  101.05    9.53
 -10  12   1  106.27    9.26
  -9 -12   1  116.97    7.97
   9 -12  -1   93.66    9.53
   9 -12  -1  100.21    9.46
  -9  12   1  102.96    8.94
  -9  12   1  102.40    9.41
   9  12  -1  120.90    9.04
   8 -12  -1    9.57    3.05
  -8 -12   1   16.79    2.23
   8 -12  -1    6.98    2.52
  -8  12   1   13.82    2.80
  -8  12   1    9.14    2.86
  -8  12   1   13.62    2.97
   8  12  -1   20.88    3.18
   7 -12  -1   40.67    4.90
   7 -12  -1   39.83    5.20
  -7 -12   1   42.83    3.70
   7  12  -1   39.43    4.38
  -7  12   1   43.89    4.54
  -7  12   1   40.73    4.50
  -7  12   1   38.10    4.75
  -6 -12   1    3.95    1.29
   6 -12  -1    1.07    1.63
   6 -12  -1   -0.05    1.53
  -6  12   1    2.31    1.57
   6  12  -1    4.64    1.77
  -6  12   1    0.51    1.46
  -6  12   1    0.14    1.45
   5 -12  -1   55.18    5.49
  -5 -12   1   65.12    4.79
   5 -12  -1   63.45    5.89
   5  12  -1   59.30    5.15
  -5  12   1   54.11    5.69
   5  12  -1   53.76    5.02
  -5  12   1   51.06    4.92
  -5  12   1   53.46    5.17
   4 -12  -1   16.34    2.91
   4 -12  -1   18.98    3.31
  -4 -12   1   14.89    2.53
  -4 -12   1   13.27    2.10
   4  12  -1   14.63    2.55
  -4  12   1   18.60    2.51
  -4  12   1   18.71    2.69
   4  12  -1    9.91    2.22
  -4  12   1   22.33    3.58
  -3 -12   1  365.58   24.00
  -3 -12   1  386.48   24.38
   3 -12  -1  363.98   24.73
   3 -12  -1  388.17   24.63
   3  12  -1  377.89   24.60
   3  12  -1  357.81   23.23
  -3  12   1  380.44   25.03
  -3  12   1  371.40   24.41
   3  12  -1  349.13   24.20
  -2 -12   1   35.47    3.47
  -2 -12   1   28.06    3.29
   2 -12  -1   41.73    5.61
   2 -12  -1   36.89    4.14
   2 -12  -1   38.54    3.63
  -2 -12   1   36.14    3.57
  -2 -12   1   35.09    4.16
  -2  12   1   41.58    3.67
   2  12  -1   36.26    3.79
   2  12  -1   32.42    2.93
  -2  12   1   43.74    4.34
   2  12  -1   38.91    4.20
  -2  12   1   41.21    3.78
   1 -12  -1  119.40    8.47
  -1 -12   1  112.53    7.87
  -1 -12   1  115.04    8.24
   1 -12  -1  107.69    8.38
   1 -12  -1  111.98    8.21
  -1 -12   1  116.54    8.26
   1 -12  -1  110.41    8.38
  -1 -12   1  115.54    8.48
  -1  12   1  108.33    8.03
   1  12  -1  110.28    7.83
  -1  12   1  116.33    8.88
   1  12  -1  105.51    8.70
  -1  12   1  109.69    8.24
   1  12  -1  108.03    8.34
   0 -12  -1    2.21    1.02
   0 -12  -1    3.10    1.20
   0 -12   1    7.26    1.55
   0 -12  -1    4.04    1.47
   0 -12  -1    2.87    1.28
   0 -12   1    6.10    1.57
   0 -12   1    7.79    1.79
   0  12   1    1.66    1.39
   0  12  -1    7.30    1.53
   0  12  -1    7.18    1.81
   0  12   1    1.89    0.98
   0  12  -1    8.46    2.26
   0  12   1    1.82    1.28
  -1 -12  -1   41.81    3.55
  -1 -12  -1   40.24    3.50
  -1 -12  -1   40.17    3.27
   1 -12   1   33.99    3.69
   1 -12   1   35.78    3.64
  -1 -12  -1   39.87    3.48
  -1 -12  -1   40.98    3.82
   1  12   1   37.52    3.58
   1  12   1   34.98    3.05
  -1  12  -1   29.91    3.41
   1  12   1   40.16    4.16
  -1  12  -1   34.66    4.22
  -2 -12  -1   19.40    2.38
  -2 -12  -1   22.09    2.51
   2 -12   1   27.57    3.33
   2 -12   1   30.60    3.11
  -2 -12  -1   24.17    2.93
  -2 -12  -1   23.13    2.66
  -2  12  -1   24.64    2.95
   2  12   1   19.48    3.01
  -2  12  -1   28.23    3.64
  -2  12  -1   23.98    3.17
   2  12   1   16.81    2.58
  -3 -12  -1  155.13   10.82
   3 -12   1  147.59   10.97
   3 -12   1  147.47   11.18
  -3 -12  -1  155.52   10.57
  -3 -12  -1  162.26   10.25
   3  12   1  153.29   10.44
  -3  12  -1  139.56   10.87
  -3  12  -1  133.76   11.26
   3  12   1  144.93   10.67
  -4 -12  -1   23.05    2.49
  -4 -12  -1   25.63    2.97
   4 -12   1   24.62    3.57
   4 -12   1   24.65    3.43
  -4 -12  -1   21.19    3.02
   4  12   1   25.31    2.91
  -4  12  -1   21.81    3.77
   4  12   1   22.84    2.96
  -4  12  -1   23.99    3.24
  -4  12  -1   25.61    3.16
  -5 -12  -1    3.67    1.65
   5 -12   1    2.65    1.72
  -5 -12  -1    3.65    1.50
  -5 -12  -1    4.53    1.16
   5 -12   1    5.23    1.90
   5  12   1    3.31    1.44
  -5  12  -1    3.72    1.84
  -5  12  -1    1.72    1.53
  -5  12  -1    2.24    1.74
   6 -12   1   70.06    6.63
   6 -12   1   62.17    6.28
  -6 -12  -1   63.88    4.87
  -6  12  -1   66.43    5.96
  -6  12  -1   58.66    6.25
  -6  12  -1   73.73    6.19
   6  12   1   58.38    5.54
   7 -12   1    0.48    1.67
   7 -12   1   -0.68    1.59
  -7 -12  -1    1.51    1.01
  -7  12  -1    1.15    1.57
  -7  12  -1    1.41    1.57
   7  12   1    0.69    1.41
  -7  12  -1    1.71    1.60
  -8 -12  -1   18.73    2.26
   8 -12   1    8.23    3.52
  -8  12  -1   15.44    2.99
  -8  12  -1   14.34    4.66
   8  12   1   22.15    3.30
  -8  12  -1   15.90    3.33
  -9 -12  -1   67.30    5.28
   9 -12   1   70.03    7.31
   9 -12   1   60.47    6.70
  -9  12  -1   58.71    6.72
  -9  12  -1   68.92    7.50
  10 -12   1   57.31    6.88
  10 -12   1   54.17    6.46
 -10 -12  -1   54.33    4.86
 -10  12  -1   55.33    6.53
 -10  12  -1   50.48    5.99
  11 -12   1   82.45    8.45
 -11 -12  -1   80.99    6.79
  11 -12   1   88.57    8.77
 -11  12  -1   76.29    8.28
 -11  12  -1   83.55    8.12
  12 -12   1   54.63    7.03
 -12 -12  -1   56.39    5.42
  12 -12   1   57.60    6.77
 -12  12  -1   49.84    6.37
 -12  12  -1   53.08    6.87
  13 -12   1  119.67   11.08
 -13 -12  -1   98.35   10.75
  13 -12   1  103.66   10.25
 -13  12  -1  113.88   11.21
 -13  12  -1  112.51   10.76
  13 -13  -1   20.35    4.72
  13 -13  -1   23.97    5.14
 -13 -13   1   17.22    3.21
 -13  13   1   20.61    4.41
 -13  13   1   19.80    4.75
 -12 -13   1   17.22    3.15
  12 -13  -1   15.63    4.07
  12 -13  -1   15.75    4.38
 -12  13   1   22.36    4.93
 -12  13   1   18.31    4.04
 -11 -13   1   -0.51    1.45
  11 -13  -1    0.15    2.40
  11 -13  -1    2.59    2.56
 -11  13   1    1.51    2.30
 -11  13   1    0.42    1.96
  10 -13  -1    1.36    2.16
  10 -13  -1    1.08    2.19
 -10 -13   1    2.09    1.44
 -10  13   1    0.58    2.29
 -10  13   1    3.17    2.05
 -10  13   1    1.94    1.93
   9 -13  -1  112.66   10.31
   9 -13  -1  108.07   10.01
  -9 -13   1  113.42    8.43
  -9  13   1  117.39    9.61
  -9  13   1  103.54    9.92
  -9  13   1  125.45   10.35
   9  13  -1  130.54    9.63
   8 -13  -1   17.08    3.83
  -8 -13   1   16.80    2.39
   8 -13  -1   15.97    3.54
   8  13  -1   15.76    3.04
  -8  13   1   16.96    3.21
  -8  13   1   19.00    3.90
  -8  13   1   15.96    3.13
   7 -13  -1    1.80    1.73
   7 -13  -1    1.43    1.74
  -7  13   1   -0.09    1.37
   7  13  -1    0.31    1.29
  -7  13   1   -0.90    1.58
  -7  13   1    2.06    1.69
   6 -13  -1   63.44    6.48
  -6 -13   1   67.16    5.21
   6 -13  -1   70.10    6.45
  -6  13   1   63.77    5.81
   6  13  -1   66.92    5.85
  -6  13   1   62.94    5.98
  -6  13   1   58.55    6.23
   5 -13  -1   74.68    6.76
   5 -13  -1   79.71    6.61
  -5 -13   1   66.38    5.42
  -5  13   1   68.76    5.86
  -5  13   1   63.98    5.93
   5  13  -1   67.16    5.84
   5  13  -1   63.62    5.77
  -5  13   1   65.28    6.57
   4 -13  -1   20.63    3.56
   4 -13  -1   26.11    3.45
  -4 -13   1   15.78    2.42
  -4  13   1   21.84    3.05
  -4  13   1   25.24    3.89
   4  13  -1   14.67    2.71
   4  13  -1   19.21    3.08
  -3 -13   1  363.58   23.42
   3 -13  -1  336.48   23.73
   3 -13  -1  335.68   23.49
  -3 -13   1  338.76   23.53
  -3 -13   1  346.60   23.06
  -3  13   1  401.69   24.42
   3  13  -1  381.06   23.78
   3  13  -1  340.84   23.20
  -3  13   1  354.30   23.46
   3  13  -1  345.74   22.20
  -2 -13   1  344.16   22.28
  -2 -13   1  360.42   22.48
   2 -13  -1  339.34   22.73
   2 -13  -1  338.26   22.48
  -2 -13   1  326.96   22.21
  -2  13   1  314.06   22.95
   2  13  -1  370.53   23.04
  -2  13   1  319.81   22.26
   2  13  -1  322.08   22.32
  -2  13   1  365.81   23.30
   2  13  -1  333.48   21.62
  -1 -13   1  125.31    8.44
  -1 -13   1  115.96    8.42
  -1 -13   1  125.48    8.47
   1 -13  -1   91.31    8.10
   1 -13  -1   97.87    8.16
   1 -13  -1   90.79    8.65
   1  13  -1  136.83    9.37
  -1  13   1  111.56    8.99
   1  13  -1  126.07    8.04
  -1  13   1  102.48    8.33
   1  13  -1  121.78    8.60
   0 -13   1  184.66   12.11
   0 -13   1  192.61   13.70
   0 -13  -1  166.17   11.93
   0 -13  -1  162.28   12.14
   0 -13   1  197.90   12.46
   0 -13  -1  168.96   12.09
   0  13   1  162.80   12.15
   0  13   1  168.11   12.79
   0  13   1  172.60   11.85
   0  13  -1  163.83   12.40
   0  13  -1  186.64   12.10
   0  13  -1  188.80   13.20
   1 -13   1  625.79   40.47
  -1 -13  -1  665.09   39.66
  -1 -13  -1  637.37   39.93
  -1 -13  -1  621.74   39.98
   1  13   1  617.43   40.54
  -1  13  -1  605.79   40.08
  -1  13  -1  653.89   41.09
   1  13   1  612.41   39.48
  -1  13  -1  610.29   40.38
   1  13   1  630.68   40.05
   2 -13   1  385.04   25.86
   2 -13   1  368.73   26.07
  -2 -13  -1  404.22   25.42
  -2 -13  -1  433.33   25.49
  -2  13  -1  382.99   25.99
   2  13   1  392.95   25.48
  -2  13  -1  376.05   26.56
  -2  13  -1  379.41   25.85
   2  13   1  412.87   26.07
   2  13   1  391.30   24.76
   3 -13   1  245.66   17.87
  -3 -13  -1  278.03   17.25
  -3 -13  -1  258.97   17.27
  -3 -13  -1  262.62   17.51
   3 -13   1  264.28   18.25
   3  13   1  261.88   17.47
   3  13   1  257.85   17.71
  -3  13  -1  259.65   18.01
  -3  13  -1  259.53   18.59
  -4 -13  -1   24.64    2.61
  -4 -13  -1   25.50    3.02
   4 -13   1   24.80    3.50
   4 -13   1   21.81    3.53
  -4  13  -1   28.36    3.58
   4  13   1   22.28    2.93
   4  13   1   24.58    3.17
  -4  13  -1   25.97    3.73
   5 -13   1  398.61   26.82
   5 -13   1  413.43   26.64
  -5 -13  -1  411.80   25.24
  -5 -13  -1  382.20   26.37
   5  13   1  388.40   25.68
  -5  13  -1  393.32   26.07
  -5  13  -1  399.26   26.32
  -5  13  -1  349.99   26.66
   6 -13   1    0.07    1.57
  -6 -13  -1    1.14    0.97
   6 -13   1    0.03    1.45
  -6  13  -1    1.30    1.70
   6  13   1    0.93    1.36
  -6  13  -1    2.02    1.66
  -6  13  -1    2.28    1.87
   7 -13   1   16.45    4.33
   7 -13   1   16.16    3.62
  -7 -13  -1   24.79    2.51
  -7  13  -1   25.38    4.01
  -7  13  -1   25.35    3.81
   7  13   1   24.29    3.30
   8 -13   1    4.89    2.13
  -8 -13  -1    2.10    1.22
   8 -13   1    4.93    2.66
  -8  13  -1    6.40    2.68
  -8  13  -1    7.11    2.42
  -8  13  -1    5.01    2.16
   8  13   1    1.07    1.64
  -9 -13  -1   38.71    3.74
   9 -13   1   42.95    5.47
   9 -13   1   42.33    5.75
  -9  13  -1   35.34    4.91
  -9  13  -1   41.61    5.64
  -9  13  -1   39.94    5.00
 -10 -13  -1   84.11    6.48
  10 -13   1   82.92    8.24
  10 -13   1   88.80    8.73
 -10  13  -1   76.86    7.78
 -10  13  -1   75.59    8.28
 -10  13  -1   75.66    7.67
  11 -13   1   52.06    6.51
 -11 -13  -1   47.01    4.68
  11 -13   1   52.27    6.82
 -11  13  -1   53.89    6.08
 -11  13  -1   38.00    5.55
 -11  13  -1   50.33    6.62
  12 -13   1   42.07    9.95
 -12 -13  -1   46.56    4.91
 -12  13  -1   52.96    6.39
 -12  13  -1   49.60    6.20
  12 -14  -1    1.61    2.62
  12 -14  -1    1.81    2.49
 -12 -14   1    2.49    3.13
 -12  14   1    0.25    2.71
 -12  14   1    0.97    2.45
 -12  14   1    1.94    2.42
  11 -14  -1   11.15    3.95
  11 -14  -1    6.95    3.56
 -11 -14   1    6.56    2.07
 -11  14   1    7.86    2.91
 -11  14   1    9.67    3.60
 -11  14   1    8.97    3.14
  10 -14  -1    2.65    2.32
 -10 -14   1   -0.58    1.36
  10 -14  -1   -1.12    1.95
  10  14  -1    4.58    2.24
 -10  14   1    0.84    2.34
 -10  14   1   -0.22    1.85
 -10  14   1   -0.39    1.84
  -9 -14   1   52.12    4.64
   9 -14  -1   46.60    6.09
   9 -14  -1   47.74    6.32
   9  14  -1   55.06    5.65
  -9  14   1   52.36    5.81
  -9  14   1   60.47    6.67
  -9  14   1   54.31    6.63
   8 -14  -1   17.71    3.74
   8 -14  -1   17.62    3.90
  -8  14   1   21.25    3.76
  -8  14   1   19.31    3.55
   8  14  -1   23.71    3.44
  -8  14   1   30.30    4.92
   7 -14  -1   13.25    3.59
  -7 -14   1    9.71    1.97
   7 -14  -1   11.13    3.72
  -7  14   1   16.69    3.13
   7  14  -1   12.28    2.68
  -7  14   1   15.89    3.62
  -7  14   1   11.91    2.68
   6 -14  -1    0.38    1.70
   6 -14  -1    1.21    1.68
  -6  14   1    0.52    1.45
   6  14  -1    1.60    1.25
  -6  14   1    1.99    1.57
  -6  14   1    1.61    1.74
   5 -14  -1   18.26    3.76
  -5 -14   1   21.20    2.70
   5 -14  -1   23.01    3.79
  -5  14   1   22.79    3.42
  -5  14   1   19.87    4.02
   5  14  -1   21.06    3.05
   5  14  -1   21.98    3.31
  -4 -14   1  217.12   14.49
   4 -14  -1  202.91   15.15
   4 -14  -1  193.03   15.28
  -4  14   1  220.15   15.80
   4  14  -1  220.93   15.07
  -4  14   1  218.18   15.05
   4  14  -1  216.04   14.75
  -3 -14   1    5.44    1.64
   3 -14  -1    7.23    2.13
  -3 -14   1    4.56    1.57
   3 -14  -1    5.72    2.18
   3  14  -1    6.68    0.91
  -3  14   1    8.16    2.60
  -3  14   1    5.19    1.96
   3  14  -1    4.15    1.94
   3  14  -1    4.03    1.71
   2 -14  -1    1.11    1.19
   2 -14  -1    1.71    1.59
  -2 -14   1    0.93    1.23
   2  14  -1    1.59    0.98
   2  14  -1    2.56    1.84
  -2  14   1    1.87    1.91
   2  14  -1    2.57    1.31
  -2  14   1    2.15    1.54
   1 -14  -1  348.36   26.03
  -1 -14   1  400.51   26.08
   1 -14  -1  368.01   26.37
  -1  14   1  397.24   25.76
   1  14  -1  447.60   26.98
   1  14  -1  413.28   26.20
  -1  14   1  387.22   26.03
  -1  14   1  394.24   26.76
   1  14  -1  421.80   25.57
   0 -14   1   17.65    2.95
   0 -14   1   13.51    2.44
   0 -14  -1   20.75    2.63
   0 -14  -1   19.24    2.58
   0  14  -1   13.02    2.71
   0  14  -1   17.42    3.42
   0  14  -1   18.13    2.99
   0  14   1   15.21    2.67
   0  14   1   19.77    3.34
   0  14   1   19.42    2.37
  -1 -14  -1  568.44   34.85
  -1 -14  -1  573.09   34.39
   1 -14   1  529.27   35.23
  -1 -14  -1  542.84   34.71
   1 -14   1  515.96   34.84
  -1  14  -1  551.17   35.89
   1  14   1  510.09   35.24
  -1  14  -1  523.60   35.14
   1  14   1  561.35   35.48
   1  14   1  537.35   34.19
  -1  14  -1  539.44   34.83
   2 -14   1   74.42    6.82
  -2 -14  -1   89.89    6.66
  -2 -14  -1   86.42    6.70
   2 -14   1   70.73    7.07
  -2 -14  -1   95.37    6.68
  -2  14  -1   76.62    7.61
   2  14   1   95.35    7.38
   2  14   1   91.55    5.88
  -2  14  -1   75.82    7.04
   2  14   1   90.44    6.74
  -3 -14  -1   22.31    2.76
   3 -14   1   21.55    3.58
  -3 -14  -1   20.70    3.38
   3 -14   1   23.15    3.53
  -3 -14  -1   22.58    2.59
  -3  14  -1   25.17    4.40
   3  14   1   17.32    3.08
  -3  14  -1   25.25    3.76
   3  14   1   21.49    2.98
  -4 -14  -1  102.22    7.30
   4 -14   1  102.87    8.56
   4 -14   1   94.12    8.13
  -4 -14  -1   90.73    7.94
   4  14   1   92.94    7.48
  -4  14  -1   96.09    8.74
  -4  14  -1  105.80    8.36
   4  14   1  103.43    7.80
   5 -14   1   16.64    3.27
   5 -14   1   18.12    3.71
  -5 -14  -1   24.40    2.56
  -5  14  -1   19.54    3.10
  -5  14  -1   15.51    3.63
  -5  14  -1   18.76    3.40
   5  14   1   16.53    2.73
   6 -14   1    8.25    2.80
  -6 -14  -1   11.88    1.87
   6 -14   1   14.59    3.35
  -6  14  -1   15.89    3.00
   6  14   1    9.36    2.32
  -6  14  -1   13.63    2.89
   7 -14   1  263.44   20.14
   7 -14   1  277.22   19.88
  -7 -14  -1  269.90   18.10
  -7  14  -1  291.45   20.50
  -7  14  -1  279.82   19.47
  -7  14  -1  273.34   19.59
   7  14   1  292.34   19.14
  -8 -14  -1    4.00    1.42
   8 -14   1    4.44    2.19
   8 -14   1    1.83    2.24
  -8  14  -1    5.19    2.74
  -8  14  -1    3.35    1.97
   8  14   1    3.90    1.93
  -8  14  -1    4.40    2.35
   9 -14   1  152.10   13.31
   9 -14   1  141.56   12.67
  -9 -14  -1  166.77   11.18
  -9  14  -1  162.73   13.50
  -9  14  -1  164.13   12.72
  -9  14  -1  151.66   12.66
   9  14   1  176.56   12.35
  10 -14   1   21.44    4.41
  10 -14   1   18.43    4.42
 -10 -14  -1   18.93    2.80
 -10  14  -1   17.35    4.44
 -10  14  -1   19.24    4.00
 -10  14  -1   19.21    3.88
  11 -14   1   27.20    5.41
  11 -14   1   23.33    4.73
 -11 -14  -1   24.37    3.43
 -11  14  -1   22.31    4.43
 -11  14  -1   20.33    4.78
 -11  14  -1   25.06    4.60
  12 -14   1    5.83    3.35
 -12 -14  -1    0.12    1.78
  12 -14   1    6.41    3.52
 -12  14  -1    3.24    3.01
 -12  14  -1    3.03    2.55
 -12  14  -1    3.95    2.77
  11 -15  -1    1.07    3.03
 -11 -15   1    4.29    1.92
  11 -15  -1    5.27    3.35
 -11  15   1    0.99    2.21
 -11  15   1    1.54    2.77
 -10 -15   1   22.45    3.34
  10 -15  -1   20.78    4.92
  10 -15  -1   20.96    4.50
 -10  15   1   24.07    4.36
 -10  15   1   21.99    4.07
  10  15  -1   29.21    4.18
 -10  15   1   22.78    5.25
   9 -15  -1   18.66    4.32
   9 -15  -1   20.72    4.20
  -9 -15   1   17.90    2.76
  -9  15   1   17.05    3.85
   9  15  -1   18.59    4.15
  -9  15   1   26.80    4.37
  -9  15   1   21.08    4.47
  -8 -15   1    2.00    1.36
   8 -15  -1   -2.75    1.74
   8 -15  -1    2.29    2.22
  -8  15   1    0.72    1.95
  -8  15   1   -0.61    1.60
   8  15  -1    2.87    1.80
  -8  15   1    1.68    2.28
   7 -15  -1   28.27    4.98
  -7 -15   1   28.12    3.18
   7 -15  -1   33.76    4.62
  -7  15   1   26.14    4.22
  -7  15   1   30.04    3.90
  -7  15   1   26.16    4.77
   7  15  -1   29.17    3.76
   6 -15  -1    9.99    3.03
  -6 -15   1    9.10    1.87
   6  15  -1    8.02    2.23
  -6  15   1    7.37    2.09
  -6  15   1    9.97    2.94
  -6  15   1    6.63    2.29
  -5 -15   1  241.00   16.17
   5 -15  -1  223.55   17.29
   5 -15  -1  239.97   17.18
  -5  15   1  240.97   17.68
   5  15  -1  249.14   16.60
  -5  15   1  231.72   16.80
   5  15  -1  246.65   16.70
   4 -15  -1   41.76    4.93
   4 -15  -1   37.37    4.58
  -4 -15   1   44.39    4.08
   4  15  -1   37.80    4.48
  -4  15   1   43.62    5.27
  -4  15   1   43.90    4.62
   4  15  -1   42.58    4.39
  -3 -15   1    6.74    1.67
   3 -15  -1    2.63    1.48
   3 -15  -1    1.79    1.72
   3  15  -1    4.90    0.83
  -3  15   1    3.75    2.25
  -3  15   1    4.67    1.81
   3  15  -1    5.44    1.99
   3  15  -1    6.76    1.91
   2 -15  -1    7.53    1.92
   2 -15  -1    5.84    2.03
  -2 -15   1    6.62    1.89
   2  15  -1    6.17    2.27
  -2  15   1    5.85    2.44
   2  15  -1    5.30    1.27
  -2  15   1    5.31    1.71
   2  15  -1    4.76    1.81
   1 -15  -1    0.63    1.02
   1 -15  -1    0.16    1.15
  -1 -15   1    1.05    1.36
  -1  15   1    2.27    1.90
  -1  15   1    0.17    1.04
   1  15  -1   -0.45    1.25
   1  15  -1    0.20    0.97
   1  15  -1    2.12    1.81
  -1  15   1    0.06    1.33
   0 -15   1    2.56    1.43
   0 -15  -1    2.27    1.06
   0 -15  -1    0.77    1.27
   0  15  -1    2.78    2.09
   0  15   1    1.00    1.15
   0  15   1    2.14    1.41
   0  15  -1    2.75    1.23
   0  15  -1    1.69    1.66
   0  15   1    1.20    1.71
  -1 -15  -1  154.77   11.41
  -1 -15  -1  156.52   10.89
   1 -15   1  168.02   11.55
   1 -15   1  148.40   11.75
   1  15   1  161.43   10.76
  -1  15  -1  161.59   11.86
   1  15   1  168.00   12.18
  -1  15  -1  171.33   12.63
   1  15   1  159.32   11.38
   2 -15   1    8.11    2.21
  -2 -15  -1   11.32    2.09
  -2 -15  -1   12.20    2.13
  -2 -15  -1   13.76    2.36
   2 -15   1    7.35    2.25
   2  15   1    9.43    1.33
   2  15   1   12.53    2.23
   2  15   1   12.34    2.54
  -2  15  -1    6.29    2.71
  -2  15  -1    7.39    2.20
   3 -15   1   15.30    3.12
  -3 -15  -1   13.59    2.22
   3 -15   1   12.87    2.71
  -3 -15  -1   14.78    2.33
  -3  15  -1   17.35    3.79
   3  15   1   19.36    3.03
  -3  15  -1   16.14    3.00
   3  15   1   15.41    2.59
  -4 -15  -1    1.84    1.12
   4 -15   1    2.22    1.70
   4 -15   1    0.25    1.30
  -4 -15  -1    2.18    1.04
   4  15   1    1.48    1.54
   4  15   1    1.03    1.26
  -4  15  -1    2.06    1.92
  -4  15  -1    1.74    1.93
   5 -15   1  361.62   25.37
  -5 -15  -1  356.98   24.07
   5 -15   1  387.51   25.87
  -5  15  -1  356.34   25.23
  -5  15  -1  407.60   27.39
   5  15   1  370.69   24.57
   6 -15   1   61.58    6.51
  -6 -15  -1   63.26    5.11
   6 -15   1   68.67    6.97
  -6  15  -1   65.32    6.04
  -6  15  -1   69.60    7.13
  -6  15  -1   57.14    6.19
   6  15   1   64.39    5.83
   7 -15   1    5.01    2.22
   7 -15   1    4.94    2.56
  -7  15  -1    2.76    2.00
  -7  15  -1    3.33    1.86
   7  15   1    5.01    1.76
  -8 -15  -1   -0.13    1.09
   8 -15   1   -1.37    1.80
   8 -15   1    0.47    2.01
  -8  15  -1    1.17    1.78
  -8  15  -1   -2.56    2.01
  -8  15  -1   -0.89    1.77
   8  15   1   -1.41    1.44
   9 -15   1    3.86    2.43
   9 -15   1    2.79    2.41
  -9 -15  -1    3.51    1.54
   9  15   1    2.28    1.92
  -9  15  -1    3.59    2.37
  -9  15  -1    2.29    2.26
  -9  15  -1    2.81    2.64
 -10 -15  -1   -0.32    1.40
  10 -15   1    1.42    2.99
  10 -15   1    3.61    2.63
 -10  15  -1   -0.43    2.13
 -10  15  -1    1.58    2.64
 -10  15  -1    3.98    2.42
  11 -15   1    2.50    2.93
  11 -15   1    4.61    2.83
 -11 -15  -1    3.28    1.85
 -11  15  -1    4.25    3.30
 -11  15  -1    2.76    2.73
 -10 -16   1    0.33    1.52
  10 -16  -1   -0.19    2.65
 -10  16   1    1.90    2.21
 -10  16   1   -0.60    2.07
 -10  16   1    3.93    3.31
  10  16  -1    4.21    2.38
   9 -16  -1   39.35    5.94
  -9 -16   1   39.28    3.96
   9 -16  -1   39.95    5.55
  -9  16   1   37.79    5.20
  -9  16   1   34.06    4.74
   9  16  -1   31.18    4.52
  -9  16   1   42.70    5.93
   8 -16  -1   66.52    7.28
   8 -16  -1   64.93    7.04
  -8 -16   1   74.93    5.70
  -8  16   1   61.30    7.45
  -8  16   1   59.89    6.68
  -8  16   1   60.92    6.39
   8  16  -1   71.14    7.24
   7 -16  -1   14.36    3.43
  -7 -16   1   13.46    2.29
   7 -16  -1   19.04    3.95
  -7  16   1   14.81    3.79
  -7  16   1   15.72    3.86
   7  16  -1   16.62    3.10
   6 -16  -1    0.60    1.70
   6 -16  -1    0.17    1.40
  -6 -16   1    1.85    1.25
   6  16  -1    0.32    1.51
  -6  16   1    0.66    1.91
  -6  16   1    1.67    1.77
  -5 -16   1   73.77    6.07
   5 -16  -1   69.72    6.81
   5  16  -1   73.34    6.63
   5  16  -1   77.77    6.50
  -5  16   1   74.96    7.49
  -5  16   1   69.31    6.72
   4 -16  -1  116.21    9.62
  -4 -16   1  126.51    9.11
   4 -16  -1  109.52    9.82
   4  16  -1  124.66    9.70
  -4  16   1  120.31   10.57
   4  16  -1  122.14    9.23
  -4  16   1  126.34    9.66
   3 -16  -1  320.14   23.62
   3 -16  -1  349.24   23.49
  -3 -16   1  338.95   23.05
   3  16  -1  357.97   23.23
   3  16  -1  367.72   23.79
  -3  16   1  347.27   23.48
  -3  16   1  352.29   24.35
   2 -16  -1   95.41    8.27
  -2 -16   1  111.41    8.19
   2 -16  -1   96.84    7.99
   2  16  -1  101.79    8.63
   2  16  -1  106.31    7.07
  -2  16   1  101.33    8.94
  -2  16   1   92.42    8.09
   2  16  -1  102.55    8.06
   1 -16  -1    2.11    1.61
  -1 -16   1    2.27    1.54
   1 -16  -1    1.52    1.24
   1  16  -1    1.91    2.04
  -1  16   1    4.30    1.95
  -1  16   1    3.29    1.57
   1  16  -1    3.85    1.84
   1  16  -1    0.90    1.12
   0 -16   1   69.05    6.18
   0 -16  -1   72.03    6.06
   0  16   1   73.35    6.77
   0  16  -1   66.68    5.56
   0  16  -1   64.41    6.66
   0  16   1   70.02    5.39
   0  16   1   67.07    5.83
   0  16  -1   66.26    6.11
  -1 -16  -1   16.47    2.65
   1 -16   1   20.49    2.82
   1 -16   1   18.83    3.25
   1  16   1   18.59    2.87
  -1  16  -1   22.04    4.06
   1  16   1   17.13    2.03
   1  16   1   13.92    3.15
  -1  16  -1   19.13    3.30
   2 -16   1  116.82    8.77
  -2 -16  -1  108.12    8.33
   2 -16   1  109.48    9.05
   2  16   1  109.17    8.91
   2  16   1  112.29    7.41
  -2  16  -1  111.34    9.67
  -2  16  -1  103.03    8.81
   2  16   1  111.21    8.35
   3 -16   1   88.46    7.60
   3 -16   1   83.68    7.86
  -3 -16  -1   91.04    6.97
   3  16   1   92.54    7.09
  -3  16  -1   88.40    8.96
  -3  16  -1   86.10    7.61
   3  16   1   90.15    7.51
   4 -16   1   37.22    4.76
   4 -16   1   36.41    4.92
   4  16   1   47.96    4.70
  -4  16  -1   44.14    5.64
  -4  16  -1   38.52    4.77
   4  16   1   53.12    4.49
   5 -16   1   50.45    5.89
  -5  16  -1   57.72    6.61
  -5  16  -1   47.43    5.73
   5  16   1   64.70    5.38
  -6 -16  -1    9.94    1.90
   6 -16   1    9.44    3.10
   6 -16   1    6.90    2.63
   6  16   1    6.51    1.98
  -6  16  -1   12.33    4.27
  -6  16  -1   10.61    3.40
  -7 -16  -1    9.06    1.80
   7 -16   1    8.53    2.92
   7 -16   1    9.21    3.20
  -7  16  -1    7.05    2.79
   7  16   1    8.69    2.32
  -7  16  -1    9.17    2.71
  -7  16  -1    9.91    3.12
   8 -16   1  136.72   12.01
  -8 -16  -1  136.81    9.82
   8 -16   1  155.95   12.11
  -8  16  -1  145.88   11.60
   8  16   1  131.35   10.71
  -8  16  -1  131.96   12.14
  -9 -16  -1   29.59    3.56
   9 -16   1   30.54    5.83
   9 -16   1   38.00    5.53
  -9  16  -1   36.41    4.95
  -9  16  -1   39.16    5.23
  -9  16  -1   31.39    6.01
 -10 -16  -1    5.06    1.95
  10 -16   1    3.58    2.87
  10 -16   1    1.46    2.64
 -10  16  -1    2.47    2.44
 -10  16  -1    2.90    2.94
 -10  16  -1    1.88    2.49
   9 -17  -1  181.80   14.67
  -9 -17   1  177.89   12.67
   9 -17  -1  225.46   19.79
  -9  17   1  179.27   14.14
  -9  17   1  171.21   15.40
   9  17  -1  175.97   13.68
  -9  17   1  174.52   13.55
   8 -17  -1    6.53    2.91
   8 -17  -1    6.67    3.03
  -8 -17   1   10.73    2.20
  -8  17   1    7.80    2.77
   8  17  -1    8.72    2.66
  -8  17   1    7.37    3.22
  -7 -17   1    2.04    1.42
   7 -17  -1   -1.74    2.12
   7 -17  -1   -0.93    2.03
  -7  17   1    1.21    2.47
   7  17  -1    2.72    2.00
  -7  17   1    1.82    2.21
  -6 -17   1   65.98    5.53
   6 -17  -1   68.22    6.75
   6 -17  -1   62.83    6.88
  -6  17   1   58.35    7.00
  -6  17   1   56.65    6.22
   6  17  -1   63.83    6.01
  -5 -17   1   94.33    7.31
   5 -17  -1   91.68    8.18
   5 -17  -1   83.74    8.31
   5  17  -1   97.74    7.65
  -5  17   1   89.77    7.95
  -5  17   1   86.49    8.75
   5  17  -1   88.05    7.74
  -4 -17   1    7.65    2.06
   4 -17  -1    3.80    2.29
   4  17  -1    5.98    2.01
  -4  17   1    5.15    2.59
   4  17  -1    8.15    2.35
  -4  17   1    4.96    2.19
   3 -17  -1   18.71    3.40
  -3 -17   1   22.01    3.17
   3 -17  -1   21.82    3.83
   3  17  -1   24.68    3.96
   3  17  -1   16.21    3.06
  -3  17   1   18.02    4.48
  -3  17   1   24.70    3.47
   2 -17  -1    0.85    1.60
  -2 -17   1    0.16    1.33
   2 -17  -1    0.61    1.29
  -2  17   1    2.30    2.21
   2  17  -1    1.99    1.89
   2  17  -1    1.44    1.56
   2  17  -1    1.01    1.00
  -2  17   1    3.67    1.82
   1 -17  -1    5.23    1.70
  -1 -17   1    8.75    2.28
   1 -17  -1    4.88    1.86
  -1  17   1    3.02    1.71
  -1  17   1    6.98    2.59
   1  17  -1    6.81    2.72
   1  17  -1    9.21    2.31
   0 -17  -1   15.52    2.85
   0 -17   1   10.79    2.58
   0 -17  -1   18.22    2.39
   0  17   1   12.45    3.12
   0  17  -1   10.32    2.92
   0  17   1   13.43    2.57
   0  17   1   12.52    2.06
   0  17  -1   10.59    2.53
   1 -17   1  103.08    8.60
   1 -17   1  107.18    9.16
  -1 -17  -1  120.76    8.85
   1  17   1  117.66    9.48
  -1  17  -1  105.63    8.99
   1  17   1  116.22    7.91
   1  17   1  116.99    8.64
  -2 -17  -1    1.22    1.50
   2 -17   1    3.82    1.69
   2 -17   1    1.04    1.70
  -2  17  -1    0.65    1.79
   2  17   1   -0.03    1.35
   2  17   1    1.27    0.68
   2  17   1    2.36    1.94
  -2  17  -1    1.23    2.13
   3 -17   1   10.35    3.09
  -3 -17  -1   17.98    2.62
   3 -17   1   10.93    2.75
  -3  17  -1   12.57    3.60
  -3  17  -1   10.37    2.87
   3  17   1   17.39    3.15
   3  17   1   19.41    2.68
  -4 -17  -1   21.66    2.73
   4 -17   1   13.61    3.29
   4 -17   1   17.48    3.45
   4  17   1   17.97    2.88
  -4  17  -1   14.40    3.85
  -4  17  -1   10.39    2.92
   4  17   1   23.64    3.57
  -5 -17  -1   99.69    7.62
   5 -17   1   90.06    8.99
   5 -17   1  108.94    9.03
   5  17   1  103.56    8.07
  -5  17  -1  100.64    9.74
   6 -17   1   10.90    3.08
  -6 -17  -1    5.22    1.60
   6 -17   1    5.75    2.60
   6  17   1    2.23    1.70
  -6  17  -1    4.21    2.42
  -6  17  -1    5.87    2.87
   7 -17   1    7.08    3.03
   7 -17   1    2.87    2.46
  -7 -17  -1    9.02    1.86
  -7  17  -1    6.67    2.67
  -7  17  -1    6.99    3.31
   7  17   1   11.39    2.57
   8 -17   1   10.53    3.65
  -8 -17  -1   11.39    2.17
   8 -17   1    7.32    3.20
   8  17   1   14.96    3.05
  -8  17  -1   12.11    3.34
  -8  17  -1   10.22    3.93
  -9 -17  -1  103.89    8.03
   9 -17   1  101.90   10.29
  -9  17  -1  116.22   10.04
  -9  17  -1  113.14    9.48
  -9  17  -1   96.63   10.80
  -8 -18   1   -1.27    1.48
   8 -18  -1   -2.99    2.00
   8 -18  -1    0.73    4.10
   8  18  -1   -1.27    1.92
  -8  18   1   -1.44    3.07
  -8  18   1    0.22    2.14
   7 -18  -1   68.66    7.16
  -7 -18   1   65.70    5.77
   7 -18  -1   71.94    7.67
   7  18  -1   66.55    6.50
  -7  18   1   63.07    7.70
  -7  18   1   67.16    6.97
   6 -18  -1   86.71    9.08
   6 -18  -1   99.12    9.07
  -6 -18   1  102.82    7.78
   6  18  -1  105.74    9.00
  -6  18   1   96.91    9.85
  -6  18   1   99.16    8.77
  -5 -18   1    2.09    1.46
   5 -18  -1   -0.99    1.72
   5 -18  -1    1.45    1.76
  -5  18   1    0.92    2.48
  -5  18   1   -0.24    1.90
   5  18  -1    0.60    1.87
   5  18  -1    1.97    1.85
   4 -18  -1   94.31    8.25
  -4 -18   1   71.02    6.75
   4 -18  -1   88.46    8.37
   4  18  -1   88.92    7.17
  -4  18   1   74.79    8.16
   4  18  -1   80.43    7.39
  -4  18   1   78.80    7.34
   3 -18  -1   80.62    8.89
  -3 -18   1   80.84    6.91
   3 -18  -1   80.58    7.23
  -3  18   1   83.10    7.28
   3  18  -1   84.09    6.98
  -3  18   1   78.50    8.16
   3  18  -1   81.54    7.57
  -2 -18   1    8.39    2.28
   2 -18  -1    7.70    2.43
   2 -18  -1    4.82    1.99
  -2  18   1    3.67    2.42
   2  18  -1    7.89    2.82
  -2  18   1    6.20    2.23
   2  18  -1    8.29    2.15
   1 -18  -1    0.57    1.44
   1 -18  -1    2.72    1.56
  -1 -18   1    2.97    1.77
   1  18  -1    4.00    2.30
  -1  18   1    0.55    1.61
  -1  18   1    2.25    2.15
   1  18  -1    4.95    1.92
   0 -18  -1   11.24    2.43
   0 -18   1   11.67    2.73
   0  18   1   12.50    2.59
   0  18  -1    9.21    2.36
   0  18  -1   13.11    3.48
   0  18   1   12.30    4.99
  -1 -18  -1   39.20    4.27
   1 -18   1   35.36    4.44
   1  18   1   34.23    4.03
  -1  18  -1   35.63    5.28
  -1  18  -1   37.77    4.63
   1  18   1   36.73    4.86
   2 -18   1  197.03   17.23
   2 -18   1  195.64   13.85
  -2 -18  -1  188.58   13.56
   2  18   1  196.43   13.44
  -2  18  -1  187.91   14.96
   2  18   1  175.98   14.04
  -2  18  -1  190.10   14.13
   3 -18   1    2.75    1.75
  -3 -18  -1    0.87    1.40
   3 -18   1    3.49    2.19
   3  18   1   -0.02    1.69
   3  18   1   -1.64    1.31
  -3  18  -1    2.17    2.43
  -3  18  -1   -2.03    1.54
   4 -18   1    5.81    2.55
  -4 -18  -1    7.41    1.97
   4 -18   1    8.10    2.43
   4  18   1    6.98    2.29
   4  18   1    3.96    1.84
  -4  18  -1    6.52    4.27
  -4  18  -1    7.04    3.03
   5 -18   1   40.98    5.17
  -5 -18  -1   33.28    3.79
   5 -18   1   36.89    5.38
  -5  18  -1   39.52    5.80
  -5  18  -1   38.60    5.01
   5  18   1   37.88    4.32
   6 -18   1   57.13    6.74
   6 -18   1   62.43    6.62
  -6 -18  -1   54.15    5.01
  -6  18  -1   58.54    6.53
  -6  18  -1   58.32    7.37
   6  18   1   55.23    5.42
   7 -18   1    4.10    2.39
   7 -18   1    4.72    2.69
   7  18   1    3.97    1.99
  -7  18  -1    3.70    2.93
  -7  18  -1    4.13    2.59
   8 -18   1    4.18    2.91
   8 -18   1    6.00    3.46
  -8  18  -1    4.40    2.90
  -8  18  -1   10.22    3.57
   8  18   1   -0.01    1.65
  -6 -19   1   31.00    3.87
   6 -19  -1   38.27    5.57
   6 -19  -1   33.23    4.97
   6  19  -1   38.06    4.62
  -6  19   1   37.28    5.16
  -6  19   1   36.67    6.13
   5 -19  -1   -0.75    1.64
   5 -19  -1   -0.47    2.18
  -5 -19   1    2.12    1.51
   5  19  -1    0.78    2.51
   5  19  -1    2.06    1.95
  -5  19   1   -0.29    2.13
  -5  19   1   -0.84    2.31
   4 -19  -1    2.23    2.09
   4 -19  -1    1.22    1.92
  -4 -19   1    3.41    1.67
  -4  19   1   -1.02    2.27
  -4  19   1   -0.23    1.84
   4  19  -1    2.68    1.97
   4  19  -1    0.44    1.72
   3 -19  -1   17.35    3.16
  -3 -19   1   15.80    2.89
   3 -19  -1   16.82    3.57
   3  19  -1   15.32    3.51
  -3  19   1   12.52    2.99
  -3  19   1   13.37    3.57
   3  19  -1   11.94    2.88
   2 -19  -1  107.53    8.75
  -2 -19   1   97.66    8.17
   2 -19  -1   91.99    7.90
  -2  19   1   93.83    8.19
  -2  19   1   94.78    9.23
   2  19  -1  102.96    8.93
   2  19  -1   92.98    8.02
  -1 -19   1   -0.16    1.68
   1 -19  -1   -0.65    1.35
   1 -19  -1    0.79    1.60
  -1  19   1   -0.67    1.56
   1  19  -1   -0.35    2.15
   1  19  -1    1.03    1.67
  -1  19   1    1.05    2.07
   0 -19  -1   11.27    2.73
   0  19   1   12.16    3.34
   0  19  -1    9.28    3.21
   0  19  -1    7.87    2.62
   0  19   1    8.37    2.32
  -1 -19  -1   38.66    4.58
   1 -19   1   47.21    5.07
  -1  19  -1   47.32    6.13
  -1  19  -1   41.95    4.97
   1  19   1   42.13    4.50
   1  19   1   41.98    5.38
  -2 -19  -1  119.27    9.47
   2 -19   1  126.15    9.69
   2 -19   1  125.43   10.24
  -2  19  -1  129.00   11.21
   2  19   1  134.36   10.10
   2  19   1  100.68    9.05
   3 -19   1   -0.10    1.98
  -3 -19  -1    0.42    1.44
   3 -19   1    0.20    1.70
  -3  19  -1    2.75    2.68
   3  19   1    1.95    1.69
   3  19   1    0.49    1.99
  -3  19  -1    2.97    2.12
   4 -19   1   -0.28    2.18
   4 -19   1    1.71    1.87
  -4 -19  -1    2.66    1.60
   4  19   1    0.04    1.33
   4  19   1   -0.45    1.82
  -4  19  -1    0.33    2.54
  -4  19  -1    1.03    2.05
   5 -19   1   88.90    8.44
   5 -19   1   80.05    7.82
  -5 -19  -1   86.72    6.83
  -5  19  -1   73.34    8.58
  -5  19  -1   78.12    7.82
   6 -19   1   35.99    5.12
  -6 -19  -1   22.56    3.20
   6 -19   1   35.41    5.42
  -6  19  -1   25.17    4.38
  -6  19  -1   20.65    5.16
  -4 -20   1   26.54    3.78
   4 -20  -1   21.74    3.84
   4 -20  -1   22.04    4.38
   4  20  -1   28.63    4.53
  -4  20   1   25.68    5.13
  -4  20   1   22.46    4.16
   4  20  -1   25.31    3.92
   3 -20  -1   42.22    5.58
   3 -20  -1   44.21    5.07
   3  20  -1   49.17    5.20
   3  20  -1   45.89    5.52
  -3  20   1   38.52    5.98
  -2 -20   1   60.57    6.50
   2 -20  -1   62.95    6.45
   2 -20  -1   60.14    5.85
   2  20  -1   59.79    6.68
  -2  20   1   54.12    6.89
   2  20  -1   66.20    6.80
   1 -20  -1   10.27    2.73
  -1 -20   1    9.89    2.79
   1  20  -1    9.90    3.35
   1  20  -1   12.48    3.23
  -1  20   1   16.17    3.88
   0 -20   1   -0.16    1.66
   0 -20  -1    0.33    1.76
   0  20  -1   -0.81    1.80
   0  20  -1    0.99    2.44
   0  20   1   -0.41    1.35
   0  20   1   -0.98    2.08
  -1 -20  -1    1.52    1.76
   1 -20   1    1.18    1.99
  -1  20  -1   -1.21    1.95
   1  20   1    2.54    2.23
   1  20   1    1.12    1.47
  -1  20  -1   -0.02    2.46
   2 -20   1   50.44    5.76
  -2 -20  -1   48.13    5.13
  -2  20  -1   44.57    5.53
  -2  20  -1   49.86    6.52
   2  20   1   46.46    5.62
   3 -20   1   15.47    3.14
  -3 -20  -1   17.45    2.82
   3 -20   1   12.28    3.30
  -3  20  -1    6.87    2.96
   3  20   1   13.47    3.00
  -3  20  -1   14.42    4.20
  -4 -20  -1  243.26   16.27
   4 -20   1  217.34   16.91
   4 -20   1  227.86   17.61
   4  20   1  247.24   16.76
  -4  20  -1  227.62   18.28
  -4  20  -1  224.41   17.13
  16   0  -2   21.32    4.04
 -16   0   2   12.65    3.47
 -16   0   2   20.39    4.32
  16   0  -2   21.27    3.98
  15   0  -2    0.27    1.80
  15   0  -2    0.98    2.07
 -15   0   2    2.62    2.15
 -15   0   2    0.85    2.29
  14   0  -2   99.27    8.56
 -14   0   2   92.42    8.83
  14   0  -2   98.94    8.39
  13   0  -2    0.72    1.77
  13   0  -2    1.78    1.83
 -12   0   2   -0.08    1.45
  12   0  -2    0.49    1.53
  12   0  -2    3.65    1.94
  11   0  -2   -0.47    1.16
 -11   0   2   -0.13    1.51
  11   0  -2   -0.79    1.34
  10   0  -2  496.17   33.01
  10   0  -2  521.17   32.82
 -10   0   2  480.50   32.83
 -10   0   2  525.31   32.52
  10   0  -2  490.57   32.32
   9   0  -2   -0.18    0.76
   9   0  -2   -1.17    0.89
   9   0  -2    0.26    1.16
  -9   0   2   -0.92    0.84
  -9   0   2    1.15    1.19
   8   0  -2  786.64   51.84
   8   0  -2  798.40   51.57
  -8   0   2  729.02   52.10
  -8   0   2  874.92   51.46
  -8   0   2  839.28   51.65
   8   0  -2  855.07   51.32
   7   0  -2    3.10    1.12
  -7   0   2    1.65    0.90
  -7   0   2    1.30    1.12
   7   0  -2    1.99    0.94
  -7   0   2    1.91    0.95
   6   0  -2  433.48   26.39
  -6   0   2  415.95   26.57
   6   0  -2  424.07   26.57
  -6   0   2  408.86   26.39
  -6   0   2  387.79   26.53
   5   0  -2    1.64    0.67
  -5   0   2    1.41    0.62
  -5   0   2    1.31    0.67
   5   0  -2    1.76    0.83
  -5   0   2    1.65    0.80
  -4   0   2 3245.08  190.49
   4   0  -2 2912.42  190.39
   3   0  -2    4.62    0.91
  -3   0   2    6.74    0.93
  -3   0   2    3.59    0.73
   3   0  -2    6.65    0.89
   3   0  -2    4.90    0.86
  -2   0   2 1776.99  112.98
  -2   0   2 1803.25  113.41
   2   0  -2 1697.58  112.98
   2   0  -2 1766.54  112.86
  -1   0   2    0.37    0.16
  -1   0   2    0.65    0.19
   1   0  -2    0.96    0.21
   1   0  -2    0.14    0.11
   0   0  -2    0.06    0.05
  -1   0  -2    3.15    0.40
   1   0   2    3.05    0.44
  -1   0  -2    1.77    0.33
   1   0   2    2.90    0.37
   1   0   2    2.67    0.35
  -1   0  -2    2.21    0.40
  -1   0  -2    2.15    0.34
  -2   0  -2   23.74    1.79
  -2   0  -2   21.18    1.75
  -2   0  -2   23.09    1.84
   2   0   2   25.31    1.85
   2   0   2   21.84    1.77
  -2   0  -2   21.02    1.79
   3   0   2    1.07    0.53
   3   0   2    0.67    0.52
  -3   0  -2    3.70    0.82
  -3   0  -2    1.20    0.56
   3   0   2    2.23    0.60
  -3   0  -2    1.90    0.61
   5   0   2    1.62    0.79
   5   0   2    1.00    0.83
  -5   0  -2    3.74    0.93
  -5   0  -2    1.15    0.77
   5   0   2    1.31    0.72
   6   0   2 1293.03   78.73
   6   0   2 1314.97   78.99
  -6   0  -2 1240.49   78.91
  -6   0  -2 1168.27   78.89
   6   0   2 1297.90   78.93
   7   0   2    0.55    0.68
   7   0   2   -0.61    0.67
  -7   0  -2    0.73    0.90
  -7   0  -2    0.63    0.80
   7   0   2    1.37    1.02
   8   0   2  510.98   32.93
  -8   0  -2  545.90   33.33
  -8   0  -2  488.63   33.28
   8   0   2  511.98   33.27
  -8   0  -2  528.54   34.02
   8   0   2  516.17   33.25
  -9   0  -2    0.42    1.16
   9   0   2    0.26    0.91
  -9   0  -2    1.03    1.06
   9   0   2    1.61    1.33
 -10   0  -2  246.72   17.29
  10   0   2  250.30   17.08
  10   0   2  261.01   17.15
  10   0   2  238.40   16.55
  11   0   2    7.87    2.30
 -11   0  -2    4.65    2.08
  11   0   2    9.74    2.40
 -11   0  -2   10.49    2.61
 -12   0  -2   30.05    4.02
  12   0   2   35.58    4.01
  12   0   2   32.64    3.84
 -12   0  -2   29.54    4.03
 -13   0  -2    1.02    1.98
 -13   0  -2   -1.01    1.28
  13   0   2    0.07    1.53
  13   0   2    1.94    1.74
  14   0   2   48.08    5.13
  14   0   2   43.99    5.25
 -14   0  -2   49.84    5.58
 -14   0  -2   48.36    5.59
  15   0   2    1.36    1.77
  15   0   2   -0.78    2.09
 -15   0  -2   -1.70    1.82
 -15   0  -2   -1.79    1.95
  16   0   2  301.93   20.95
 -16   0  -2  309.34   21.89
 -16   0  -2  307.25   23.04
  16   0   2  292.38   21.44
 -16  -1   2    9.31    3.23
  16  -1  -2   11.96    3.50
  16  -1  -2   11.03    3.27
 -16  -1   2   16.97    3.97
  16   1  -2   12.00    3.08
 -16   1   2   10.36    3.38
  16   1  -2   15.63    3.26
 -16   1   2   10.18    3.20
 -15  -1   2    2.53    2.40
  15  -1  -2    6.07    2.38
  15  -1  -2    2.24    2.05
 -15   1   2    3.03    2.19
  15   1  -2    2.73    1.99
  15   1  -2    4.62    2.02
 -15   1   2    1.64    2.30
  14  -1  -2  130.61   10.89
  14  -1  -2  142.81   10.87
 -14  -1   2  123.55   10.83
  14   1  -2  132.84   10.60
 -14   1   2  134.25   11.20
 -14   1   2  132.58   11.01
  14   1  -2  136.19   10.55
  13  -1  -2  143.07   10.74
 -13  -1   2  111.31   10.26
  13  -1  -2  144.88   10.56
 -13   1   2  129.29   11.63
  13   1  -2  126.48   10.14
  13   1  -2  120.02    9.91
 -12  -1   2  218.93   16.51
  12  -1  -2  244.91   16.87
  12  -1  -2  246.53   16.64
  12   1  -2  220.96   16.15
 -12   1   2  227.82   16.63
  12   1  -2  228.64   16.42
 -11  -1   2  273.49   19.18
  11  -1  -2  299.31   19.29
  11  -1  -2  254.11   19.23
  11   1  -2  283.78   18.93
 -11   1   2  264.70   19.21
  11   1  -2  287.23   19.19
 -10  -1   2    3.43    1.68
  10  -1  -2    3.95    1.90
  10  -1  -2    2.40    1.53
 -10  -1   2    4.71    1.44
  10   1  -2    4.25    1.70
  10   1  -2    5.57    1.45
  10   1  -2    4.69    1.54
 -10   1   2    0.05    1.33
   9  -1  -2   64.01    5.62
   9  -1  -2   63.94    5.86
  -9  -1   2   85.42    5.76
   9  -1  -2   63.09    6.17
  -9  -1   2   85.83    6.25
  -9   1   2   56.41    5.82
   9   1  -2   85.01    6.08
  -9   1   2   72.77    5.83
  -8  -1   2   21.56    2.73
  -8  -1   2   24.40    2.74
   8  -1  -2   22.66    2.81
   8  -1  -2   23.77    3.07
  -8  -1   2   24.34    2.53
  -8   1   2   20.42    2.79
   8   1  -2   23.09    2.37
  -8   1   2   26.55    2.80
   8   1  -2   19.32    2.71
   8   1  -2   24.96    2.65
  -8   1   2   21.33    2.66
   7  -1  -2  630.45   37.19
  -7  -1   2  564.88   36.65
   7  -1  -2  650.10   36.97
  -7  -1   2  510.59   36.83
  -7  -1   2  538.57   36.88
  -7   1   2  540.79   37.01
   7   1  -2  573.42   36.60
  -7   1   2  638.21   37.00
  -7   1   2  602.78   37.06
   7   1  -2  555.17   36.82
  -6  -1   2  825.25   52.68
   6  -1  -2  868.91   52.68
   6  -1  -2  889.56   52.89
  -6  -1   2  862.01   52.76
  -6  -1   2  804.60   52.44
   6   1  -2  845.64   52.62
   6   1  -2  873.79   52.46
  -6   1   2  754.35   52.71
  -6   1   2  836.74   52.76
  -6   1   2  826.08   52.66
  -5  -1   2   37.07    2.98
  -5  -1   2   30.30    2.84
  -5  -1   2   35.12    2.72
   5   1  -2   33.17    2.82
   5   1  -2   38.85    2.79
   5   1  -2   28.00    2.89
  -4  -1   2  234.22   16.69
   4  -1  -2  292.61   16.90
   4  -1  -2  257.41   16.90
  -4  -1   2  239.44   16.59
  -4  -1   2  259.79   16.83
  -4   1   2  293.27   16.94
   4   1  -2  254.14   16.70
   4   1  -2  226.57   16.83
  -4   1   2  267.18   16.92
  -4   1   2  292.44   16.90
   4   1  -2  268.72   16.85
   3  -1  -2 9827.30  609.94
   3  -1  -2 9999.00  610.70
  -3   1   2 9560.17  610.94
  -3   1   2 9731.83  610.23
  -2  -1   2  690.73   44.14
  -2  -1   2  771.51   44.30
  -2  -1   2  698.67   44.18
   2  -1  -2  719.69   44.28
   2  -1  -2  674.42   44.28
  -2   1   2  718.14   44.27
   2   1  -2  713.36   44.15
  -2   1   2  679.69   44.27
   2   1  -2  708.93   44.28
  -2   1   2  746.73   44.26
   1  -1  -2 4699.46  274.10
   1  -1  -2 4688.74  273.86
   1   1  -2 4453.96  274.86
  -1   1   2 3917.65  273.72
  -1   1   2 4037.95  273.58
   1   1  -2 4576.82  274.52
   0   1  -2  628.01   39.01
  -1  -1  -2 1259.29   83.33
   1  -1   2 1254.18   86.25
  -1  -1  -2 1255.58   83.57
   1  -1   2 1283.42   85.81
  -1   1  -2 1242.86   86.42
  -1   1  -2 1332.81   86.26
   1   1   2 1439.12   83.44
   1   1   2 1384.10   83.63
   2  -1   2 4376.39  283.93
   2  -1   2 4523.56  283.43
  -2   1  -2 4370.88  284.25
  -2   1  -2 4572.15  284.02
  -3  -1  -2 1663.56  112.09
   3  -1   2 1805.54  112.32
  -3  -1  -2 1738.66  112.12
   3  -1   2 1810.47  112.36
  -3  -1  -2 1779.74  112.20
  -3   1  -2 1960.19  112.48
  -3   1  -2 1926.35  112.64
   3   1   2 1808.06  112.12
   3   1   2 1786.24  112.06
  -3   1  -2 1832.05  112.30
  -3   1  -2 1819.55  112.26
  -4  -1  -2   76.66    6.00
  -4  -1  -2   73.82    5.85
  -4  -1  -2   80.93    5.93
   4  -1   2   89.98    6.14
   4  -1   2   95.37    6.23
  -4   1  -2  100.50    6.38
   4   1   2   73.40    5.82
   4   1   2   75.76    5.82
   4   1   2   78.79    5.71
  -4   1  -2  103.85    6.27
  -4   1  -2   93.76    6.13
  -4   1  -2   96.40    6.12
   5  -1   2  115.79    8.24
   5  -1   2  114.62    8.40
  -5  -1  -2  138.09    8.30
  -5  -1  -2  132.98    8.39
  -5  -1  -2  127.34    8.28
   5  -1   2  112.17    8.32
  -5   1  -2  110.49    8.32
  -5   1  -2  104.06    8.22
   5   1   2  133.28    8.25
  -5   1  -2  103.60    8.25
   5   1   2  127.04    8.21
  -6  -1  -2   13.71    1.83
  -6  -1  -2   11.64    1.82
  -6  -1  -2   10.91    1.81
   6  -1   2   20.84    2.22
   6   1   2   15.39    1.66
  -6   1  -2   19.50    2.20
  -6   1  -2   21.26    2.20
   6   1   2   13.36    1.76
   6   1   2   15.28    1.80
   7  -1   2  159.26   10.60
  -7  -1  -2  161.79   10.63
   7  -1   2  142.10   10.66
  -7  -1  -2  155.54   10.68
   7  -1   2  161.40   10.88
  -7  -1  -2  146.95   11.09
   7   1   2  146.75   10.49
   7   1   2  148.58   10.20
  -7   1  -2  153.16   10.74
  -7   1  -2  162.65   10.83
   7   1   2  147.97   10.50
  -7   1  -2  149.87   10.76
   8  -1   2   88.36    7.42
   8  -1   2   91.54    7.40
  -8  -1  -2  107.85    7.36
  -8  -1  -2  108.19    7.56
   8  -1   2   87.21    7.16
  -8  -1  -2  108.54    7.58
  -8   1  -2   89.68    7.40
  -8   1  -2   95.44    7.46
   8   1   2   98.85    6.92
  -8   1  -2   86.61    7.40
   8   1   2  108.12    7.36
   8   1   2  101.49    7.29
   9  -1   2    4.57    1.67
   9  -1   2    4.31    1.57
  -9  -1  -2    3.82    1.34
  -9  -1  -2    3.11    1.44
   9  -1   2    3.68    1.34
  -9   1  -2    2.76    1.57
   9   1   2    5.19    1.53
  -9   1  -2    1.92    1.17
  -9   1  -2    4.63    1.45
   9   1   2    4.97    1.39
   9   1   2    5.31    1.23
 -10  -1  -2  170.63   11.44
  10  -1   2  167.76   11.80
 -10  -1  -2  164.23   11.75
  10  -1   2  162.98   11.70
  10   1   2  153.44   11.31
  10   1   2  154.32   11.36
 -10   1  -2  155.43   11.66
 -10   1  -2  144.88   11.61
  11  -1   2    9.46    2.38
  11  -1   2   10.26    2.63
 -11  -1  -2   13.50    2.80
 -11   1  -2   13.46    3.01
  11   1   2   12.31    2.48
  11   1   2   18.08    2.74
  11   1   2   17.13    2.34
 -11   1  -2    9.12    2.76
  12  -1   2  203.64   13.71
  12  -1   2  197.01   13.70
 -12  -1  -2  184.21   13.71
  12   1   2  169.82   13.19
 -12   1  -2  181.11   13.74
  12   1   2  180.38   13.10
 -12   1  -2  174.26   13.54
  13  -1   2    0.44    1.69
 -13  -1  -2    2.87    2.47
  13  -1   2    1.45    1.83
 -13   1  -2    0.64    1.56
  13   1   2    2.02    1.64
  13   1   2    1.43    1.42
 -13   1  -2    0.55    1.87
  14  -1   2   50.59    5.39
 -14  -1  -2   50.40    5.67
  14  -1   2   46.20    5.49
 -14  -1  -2   45.65    5.56
 -14   1  -2   47.57    5.60
 -14   1  -2   40.00    5.39
  14   1   2   53.09    5.34
  14   1   2   54.13    5.04
  15  -1   2    8.41    2.24
 -15  -1  -2    3.20    2.26
 -15  -1  -2    4.75    2.56
  15  -1   2    2.17    2.36
 -15   1  -2    3.06    2.36
  15   1   2    6.21    2.04
  15   1   2    8.59    2.55
 -15   1  -2    2.41    2.12
 -16  -1  -2    8.45    2.96
  16  -1   2    4.39    2.31
 -16  -1  -2    5.14    2.89
  16  -1   2    3.86    2.59
  16   1   2    6.59    2.36
  16   1   2    2.34    1.43
 -16   1  -2    2.29    2.78
 -16  -2   2   70.60    7.82
  16  -2  -2   81.10    7.98
  16  -2  -2   78.97    7.81
 -16   2   2   84.43    8.20
  16   2  -2   71.48    6.95
 -16   2   2   79.99    8.12
  16   2  -2   66.50    6.77
 -15  -2   2    0.61    2.09
  15  -2  -2    0.44    2.04
  15  -2  -2    0.74    1.90
  15   2  -2    0.48    1.55
 -15   2   2    0.62    1.96
  15   2  -2   -0.44    1.55
 -15   2   2   -0.58    1.82
 -14  -2   2  187.48   13.87
  14  -2  -2  172.26   13.66
  14  -2  -2  172.11   13.76
  14   2  -2  181.13   13.14
 -14   2   2  168.87   13.69
 -14   2   2  178.90   13.85
  14   2  -2  176.33   13.04
  13  -2  -2    2.70    1.88
  13  -2  -2   -1.07    1.53
 -13  -2   2    1.49    1.78
  13   2  -2    0.37    1.54
 -13   2   2    0.75    1.69
 -13   2   2   -1.24    1.67
  13   2  -2    0.20    1.39
 -12  -2   2  168.57   12.79
  12  -2  -2  161.38   12.81
  12  -2  -2  172.66   13.19
 -12   2   2  166.36   12.93
  12   2  -2  174.56   12.54
  12   2  -2  176.95   12.37
  11  -2  -2  261.30   17.76
 -11  -2   2  246.59   16.50
  11  -2  -2  249.76   17.37
 -11  -2   2  247.29   17.23
  11   2  -2  231.68   16.29
 -11   2   2  251.54   17.47
  11   2  -2  240.49   17.01
  11   2  -2  243.74   16.85
  10  -2  -2    2.11    1.42
 -10  -2   2    0.64    1.29
 -10  -2   2    0.24    0.86
  10  -2  -2    2.31    1.72
  10   2  -2    1.54    1.02
  10   2  -2    0.07    1.18
 -10   2   2    1.76    1.57
  10   2  -2   -0.39    0.85
   9  -2  -2  178.93   14.94
   9  -2  -2  228.50   15.29
  -9  -2   2  231.89   14.88
  -9  -2   2  221.07   14.27
   9  -2  -2  197.49   14.84
   9   2  -2  223.12   14.18
  -9   2   2  190.06   14.80
   9   2  -2  228.58   14.60
  -9   2   2  209.16   14.68
   9   2  -2  224.30   14.82
   8  -2  -2  136.10    9.49
   8  -2  -2  138.42   10.03
  -8  -2   2  126.67    9.42
  -8  -2   2  134.02    9.06
  -8  -2   2  136.15    9.50
   8  -2  -2  116.11    9.59
   8   2  -2  142.64    9.37
  -8   2   2  129.57    9.52
   8   2  -2  129.73    9.52
  -8   2   2  131.98    9.51
  -8   2   2  127.43    9.66
   8   2  -2  129.39    8.97
  -7  -2   2    5.37    1.37
   7  -2  -2    9.15    1.70
  -7  -2   2    6.78    1.19
  -7  -2   2    5.52    1.30
   7  -2  -2    8.51    1.76
  -7   2   2    5.81    1.55
  -7   2   2    7.96    1.59
   7   2  -2    8.39    1.40
  -7   2   2    5.51    1.52
   7   2  -2    6.80    1.37
  -6  -2   2  396.66   25.65
   6  -2  -2  418.71   25.74
  -6  -2   2  373.47   25.50
  -6  -2   2  393.39   25.28
   6  -2  -2  427.86   25.97
  -6   2   2  411.34   25.75
   6   2  -2  373.86   25.77
  -6   2   2  411.06   25.77
   6   2  -2  411.13   25.31
   6   2  -2  410.54   25.49
  -6   2   2  370.71   25.75
  -5  -2   2  183.18   12.11
  -5  -2   2  165.42   11.91
   5  -2  -2  207.64   12.43
   5   2  -2  185.08   11.82
   5   2  -2  165.73   11.85
  -5   2   2  209.42   12.31
   5   2  -2  165.72   12.17
  -5   2   2  184.79   12.25
   4  -2  -2  463.18   30.84
  -4  -2   2  524.83   30.76
  -4  -2   2  469.86   30.52
  -4  -2   2  477.91   30.39
   4  -2  -2  516.09   30.82
  -4   2   2  439.15   30.73
   4   2  -2  477.84   30.48
  -4   2   2  527.94   30.84
   4   2  -2  511.19   30.48
   4   2  -2  460.76   30.75
  -3  -2   2  774.31   50.31
  -3  -2   2  792.57   50.41
   3  -2  -2  930.66   51.01
   3   2  -2  734.74   50.57
  -3   2   2  850.85   50.71
   3   2  -2  859.87   50.42
  -3   2   2  742.33   50.60
  -2   2   2 1780.30  110.16
  -1  -2   2  236.96   15.60
  -1  -2   2  232.92   15.56
   1  -2  -2  247.20   15.44
  -1  -2   2  209.25   15.57
   1   2  -2  232.71   15.55
   1   2  -2  245.92   15.50
   1   2  -2  238.00   15.59
  -1   2   2  280.42   15.43
  -1   2   2  268.92   15.46
  -1   2   2  267.70   15.51
   0  -2  -2 2031.18  128.37
   0  -2   2 1979.74  132.60
   0  -2   2 1912.13  131.77
   0  -2  -2 2047.09  128.47
   0   2   2 2207.83  128.70
   0   2  -2 1962.59  132.62
   0   2  -2 2122.44  132.41
   0   2   2 2226.05  128.87
   1  -2   2 1978.80  145.12
   1  -2   2 1973.16  145.75
   1   2   2 2483.33  140.38
   1   2   2 2496.92  140.39
  -1   2  -2 2046.60  146.40
   1   2   2 2506.46  140.54
  -1   2  -2 2055.14  145.69
   1   2   2 2435.56  140.24
  -2  -2  -2  264.38   17.55
  -2  -2  -2  252.69   17.77
   2  -2   2  309.85   18.01
   2  -2   2  275.07   18.02
  -2  -2  -2  259.12   17.65
   2  -2   2  286.35   18.09
   2  -2   2  308.93   18.00
  -2  -2  -2  246.75   17.58
  -2   2  -2  285.92   18.00
  -2   2  -2  319.37   18.10
  -2   2  -2  276.40   17.98
  -2   2  -2  317.99   18.18
  -3  -2  -2 2059.08  131.91
   3  -2   2 2096.93  132.29
  -3  -2  -2 2074.00  131.86
  -3  -2  -2 2058.30  132.03
   3  -2   2 2121.53  132.26
  -3   2  -2 2308.09  132.32
  -3   2  -2 2139.36  132.17
  -3   2  -2 2114.02  132.19
  -3   2  -2 2229.71  132.40
  -4  -2  -2  155.97   11.13
   4  -2   2  181.12   11.32
   4  -2   2  169.52   11.17
   4  -2   2  188.02   11.19
  -4  -2  -2  161.93   10.78
  -4  -2  -2  148.03   10.73
  -4  -2  -2  147.58   10.89
  -4   2  -2  167.17   11.11
   4   2   2  154.73   10.52
   4   2   2  157.89   10.73
  -4   2  -2  192.68   11.46
   4   2   2  161.59   10.64
  -4   2  -2  185.11   11.28
  -4   2  -2  166.84   11.07
  -5  -2  -2   88.18    6.12
  -5  -2  -2   93.79    6.01
   5  -2   2   78.25    6.19
  -5  -2  -2   91.53    5.94
   5  -2   2   80.79    6.13
   5  -2   2   80.30    6.29
   5   2   2   88.22    5.88
  -5   2  -2   73.44    6.07
  -5   2  -2   73.03    6.15
   5   2   2   92.53    5.83
   5   2   2   96.12    5.67
  -5   2  -2   67.90    6.04
  -6  -2  -2  474.61   32.30
  -6  -2  -2  499.21   32.23
  -6  -2  -2  509.94   32.14
   6  -2   2  531.13   32.61
   6  -2   2  565.72   32.81
   6  -2   2  548.46   32.52
  -6   2  -2  470.03   32.39
   6   2   2  485.50   32.01
  -6   2  -2  471.50   32.44
   6   2   2  516.54   32.13
   6   2   2  493.98   31.80
  -6   2  -2  529.21   32.63
   7  -2   2  157.51   10.99
  -7  -2  -2  151.12   10.41
   7  -2   2  161.92   10.75
  -7  -2  -2  164.99   10.67
   7  -2   2  153.13   10.84
  -7   2  -2  165.37   11.44
  -7   2  -2  139.80   10.73
   7   2   2  149.44   10.33
   7   2   2  140.07   10.34
  -7   2  -2  150.04   10.75
   7   2   2  153.03   10.07
  -8  -2  -2  137.00    9.47
   8  -2   2  135.35    9.50
   8  -2   2  120.20    9.52
  -8  -2  -2  130.38    9.44
   8  -2   2  128.15    9.71
  -8  -2  -2  140.80    9.27
   8   2   2  132.37    9.12
  -8   2  -2  126.80    9.54
  -8   2  -2  133.05    9.64
  -8   2  -2  113.17    9.46
   8   2   2  136.27    9.23
   8   2   2  130.12    8.78
  -9  -2  -2  326.39   19.58
   9  -2   2  289.75   20.02
   9  -2   2  264.96   19.52
   9  -2   2  283.74   19.92
   9   2   2  308.87   19.03
  -9   2  -2  272.78   19.81
  -9   2  -2  246.43   19.71
   9   2   2  323.60   19.59
   9   2   2  330.53   19.48
 -10  -2  -2  354.05   22.26
  10  -2   2  329.40   22.36
 -10  -2  -2  340.93   21.79
  10  -2   2  321.56   22.24
  10   2   2  348.48   21.29
  10   2   2  325.38   21.62
 -10   2  -2  318.80   22.30
  10   2   2  303.81   22.19
 -10   2  -2  316.34   22.21
  11  -2   2  108.76    8.25
  11  -2   2  103.19    8.24
 -11  -2  -2  104.38    8.04
 -11   2  -2   90.40    7.97
  11   2   2   91.05    7.38
 -11   2  -2   85.85    7.95
  11   2   2  102.14    7.54
  11   2   2   82.47    7.38
  12  -2   2   18.68    3.41
 -12  -2  -2   22.50    3.50
  12  -2   2   19.79    3.64
  12   2   2   20.34    3.03
 -12   2  -2   18.14    3.59
  12   2   2   19.77    2.47
  12   2   2   22.99    2.94
 -12   2  -2   15.69    3.17
  13  -2   2   35.69    4.66
  13  -2   2   29.58    4.40
 -13   2  -2   33.50    4.49
  13   2   2   34.57    3.47
 -13   2  -2   31.38    4.60
  13   2   2   40.16    3.86
  13   2   2   40.31    4.24
  14  -2   2   34.02    4.70
 -14  -2  -2   34.40    4.72
  14  -2   2   34.10    4.67
 -14  -2  -2   36.18    4.55
 -14   2  -2   32.84    4.65
  14   2   2   36.70    3.87
 -14   2  -2   30.20    4.73
  14   2   2   30.20    4.01
 -15  -2  -2    1.68    2.18
 -15  -2  -2    4.93    2.57
  15  -2   2   -0.20    2.04
  15  -2   2    0.00    2.04
 -15   2  -2    1.16    2.24
 -15   2  -2    0.63    2.54
  15   2   2    1.63    1.88
  15   2   2    1.73    1.22
  16  -2   2   26.00    4.40
 -16  -2  -2   17.49    3.88
  16  -2   2   18.43    4.18
 -16  -2  -2   24.64    4.69
 -16   2  -2   22.70    4.98
  16   2   2   24.02    3.93
 -16   2  -2   23.62    4.65
  16  -3  -2    6.66    2.67
  16  -3  -2    0.11    2.04
 -16  -3   2    4.95    2.79
 -16   3   2    5.08    2.72
  16   3  -2    5.90    2.32
 -16   3   2    5.57    2.64
  15  -3  -2    6.26    2.62
  15  -3  -2    8.77    2.90
 -15  -3   2    4.50    2.70
  15   3  -2    4.83    2.06
 -15   3   2    9.56    2.89
  15   3  -2    8.40    2.31
 -15   3   2    8.72    3.05
  14  -3  -2  193.83   15.09
  14  -3  -2  190.85   15.25
 -14  -3   2  211.34   15.21
  14   3  -2  193.58   14.22
 -14   3   2  199.58   15.26
  14   3  -2  193.03   14.23
 -14   3   2  220.05   15.56
  13  -3  -2   24.79    4.29
 -13  -3   2   35.10    4.36
  13  -3  -2   26.79    4.61
  13   3  -2   27.45    3.55
 -13   3   2   16.08    3.60
 -13   3   2   21.46    4.18
  13   3  -2   28.54    3.63
  12  -3  -2    6.14    2.16
  12  -3  -2    2.33    1.79
 -12  -3   2    4.40    2.10
  12   3  -2    3.15    1.63
 -12   3   2    2.48    1.70
  12   3  -2    4.24    1.60
 -12   3   2    1.43    1.93
  12   3  -2    5.27    1.46
  11  -3  -2    2.44    1.90
 -11  -3   2    5.70    1.97
 -11  -3   2    4.25    1.34
  11  -3  -2    6.12    1.97
  11   3  -2    2.67    1.57
  11   3  -2    4.61    1.65
  11   3  -2    5.49    1.37
 -11   3   2    3.67    1.94
 -11   3   2    1.55    1.57
 -10  -3   2  127.27    8.48
  10  -3  -2  110.90    9.30
  10  -3  -2  103.76    9.42
 -10  -3   2  131.10    9.26
  10   3  -2  117.81    8.96
  10   3  -2  118.02    8.74
 -10   3   2  117.68    9.37
 -10   3   2  111.54    9.29
  10   3  -2  128.43    8.44
   9  -3  -2   21.20    3.07
  -9  -3   2   27.37    2.59
  -9  -3   2   27.58    3.22
   9  -3  -2   24.35    3.52
  -9   3   2   25.95    3.35
   9   3  -2   26.49    2.55
   9   3  -2   25.31    3.03
   9   3  -2   25.70    2.80
  -8  -3   2  150.16    9.85
  -8  -3   2  157.87   10.37
   8  -3  -2  142.09   10.40
  -8  -3   2  150.17   10.39
   8  -3  -2  128.21   10.52
   8  -3  -2  147.99   10.98
   8   3  -2  160.30   10.17
  -8   3   2  145.05   10.48
  -8   3   2  141.89   10.46
   8   3  -2  142.98   10.29
   8   3  -2  147.41    9.82
  -8   3   2  138.51   10.57
  -7  -3   2 1018.50   63.06
   7  -3  -2 1045.02   63.58
  -7  -3   2 1006.23   62.67
   7   3  -2  939.18   62.82
   7   3  -2 1000.70   62.67
  -7   3   2  970.64   63.38
  -7   3   2  999.21   63.87
   7   3  -2 1069.02   63.54
  -6  -3   2  150.49   10.04
   6  -3  -2  144.03   10.29
  -6  -3   2  142.99    9.54
  -6  -3   2  141.50    9.81
   6  -3  -2  151.61   10.18
  -6   3   2  140.68   10.18
   6   3  -2  149.25    9.60
   6   3  -2  142.23   10.18
  -6   3   2  156.48   10.26
   6   3  -2  140.14    9.69
  -5  -3   2   25.21    2.41
  -5  -3   2   26.61    2.27
  -5  -3   2   23.95    2.02
   5   3  -2   24.85    2.52
   5   3  -2   26.32    2.19
   5   3  -2   29.52    2.20
  -4  -3   2  852.05   53.74
   4  -3  -2  957.11   54.35
  -4  -3   2  837.54   54.08
   4  -3  -2  818.40   54.33
  -4  -3   2  859.78   54.15
  -4  -3   2  830.06   53.89
   4   3  -2  884.38   53.81
  -4   3   2  973.46   54.40
   4   3  -2  826.42   54.18
   4   3  -2  846.76   53.86
  -4   3   2  864.55   54.25
  -4   3   2  850.48   54.25
  -3  -3   2  110.46    7.21
  -3  -3   2  110.57    7.42
  -3  -3   2  104.08    7.40
   3   3  -2  127.51    7.27
   3   3  -2  108.28    7.05
   3   3  -2   99.23    7.37
  -2  -3   2 6483.88  387.12
   2  -3  -2 6049.52  391.52
   2  -3  -2 6046.12  390.56
  -2  -3   2 6584.16  386.57
  -2   3   2 6029.92  388.83
  -2   3   2 5906.42  387.96
   1  -3  -2 2793.94  185.81
  -1  -3   2 3044.97  187.88
  -1  -3   2 2965.14  187.04
   1  -3  -2 2988.93  186.55
   0  -3   2  230.82   14.73
   0  -3   2  229.15   14.72
   0  -3   2  218.69   14.70
   0  -3  -2  220.53   14.52
   0  -3   2  214.48   14.63
   0  -3  -2  221.44   14.51
   0  -3  -2  207.44   14.40
   0   3  -2  224.11   14.85
   0   3  -2  228.32   14.76
   0   3  -2  240.88   14.67
   0   3   2  264.08   14.60
   0   3   2  241.90   14.43
   0   3  -2  249.83   14.74
   0   3   2  246.50   14.52
  -1  -3  -2  729.64   49.02
   1  -3   2  787.90   49.34
  -1  -3  -2  729.15   48.97
   1  -3   2  828.73   49.32
   1  -3   2  860.86   49.38
   1  -3   2  807.71   49.31
  -1  -3  -2  702.26   48.89
  -1   3  -2  784.58   49.28
  -1   3  -2  743.40   49.27
   1   3   2  817.09   48.99
   1   3   2  829.22   49.01
  -1   3  -2  826.15   49.37
  -1   3  -2  840.61   49.33
   2  -3   2  945.07   62.57
  -2  -3  -2  983.53   62.22
   2  -3   2  943.32   62.62
   2  -3   2 1048.61   62.56
   2  -3   2 1085.65   62.59
  -2  -3  -2 1000.38   62.27
  -2  -3  -2  995.22   62.07
  -2   3  -2  927.32   62.53
  -2   3  -2  913.72   62.54
   2   3   2 1058.06   62.34
  -2   3  -2 1074.20   62.73
  -2   3  -2 1077.98   62.67
  -3  -3  -2 2003.41  122.95
  -3  -3  -2 1969.10  123.00
   3  -3   2 2076.94  123.46
   3  -3   2 1826.12  123.47
   3  -3   2 2070.73  123.46
   3  -3   2 1829.81  123.53
  -3  -3  -2 1919.05  123.21
  -3   3  -2 2121.68  123.71
  -3   3  -2 1946.67  123.46
  -3   3  -2 2138.48  123.61
  -4  -3  -2   14.12    1.30
   4  -3   2   12.24    1.84
  -4  -3  -2   15.07    1.56
  -4  -3  -2   14.93    1.36
   4  -3   2   11.21    1.59
   4  -3   2   10.99    1.68
   4   3   2   16.58    1.32
  -4   3  -2   13.31    1.71
  -4   3  -2   10.30    1.60
  -4   3  -2   14.62    1.74
  -4   3  -2   13.04    1.85
   5  -3   2 1289.99   81.20
  -5  -3  -2 1391.34   80.73
  -5  -3  -2 1289.30   80.99
   5  -3   2 1308.40   81.32
   5  -3   2 1302.90   81.42
  -5  -3  -2 1412.18   80.81
  -5   3  -2 1157.98   81.10
  -5   3  -2 1341.57   81.37
   5   3   2 1389.02   80.39
  -5   3  -2 1140.12   81.07
   5   3   2 1337.35   80.68
   5   3   2 1231.48   80.45
   6  -3   2  436.86   27.72
  -6  -3  -2  421.15   27.36
   6  -3   2  417.92   27.55
   6  -3   2  439.69   27.85
  -6  -3  -2  463.45   27.11
  -6  -3  -2  461.59   27.26
  -6   3  -2  383.59   27.50
   6   3   2  439.93   26.71
  -6   3  -2  362.47   27.40
   6   3   2  439.03   26.87
  -6   3  -2  441.99   27.75
   6   3   2  412.82   27.00
  -7  -3  -2  241.44   17.12
   7  -3   2  295.33   17.68
   7  -3   2  265.85   18.32
  -7  -3  -2  265.70   17.00
  -7   3  -2  291.75   17.83
   7   3   2  245.08   16.78
   7   3   2  254.90   16.95
  -7   3  -2  240.18   17.48
  -8  -3  -2  116.32    7.65
  -8  -3  -2   99.70    7.84
  -8  -3  -2   99.07    7.80
   8  -3   2  112.55    8.16
   8  -3   2  103.67    8.33
   8  -3   2  100.09    8.18
  -8   3  -2  119.74    8.45
  -8   3  -2  102.84    8.10
   8   3   2  112.44    7.46
  -8   3  -2  100.21    8.13
   8   3   2  106.26    7.57
   8   3   2  104.31    7.14
   9  -3   2    6.91    2.08
  -9  -3  -2    5.54    1.47
  -9  -3  -2    6.68    1.80
   9  -3   2    5.67    1.98
   9   3   2    8.43    1.27
  -9   3  -2    3.43    1.69
  -9   3  -2    2.71    1.51
   9   3   2    8.77    1.54
   9   3   2    6.91    1.58
  10  -3   2  144.18   12.05
 -10  -3  -2  174.29   12.01
  10  -3   2  154.65   12.25
 -10   3  -2  148.02   12.14
  10   3   2  183.75   11.39
 -10   3  -2  150.17   12.09
  10   3   2  178.23   11.00
  10   3   2  176.60   11.61
  11  -3   2   78.92    7.10
  11  -3   2   73.19    6.94
 -11  -3  -2   77.37    6.77
 -11  -3  -2   82.24    6.17
 -11   3  -2   61.31    6.72
  11   3   2   77.20    6.31
  11   3   2   81.91    5.67
  11   3   2   85.15    6.07
 -11   3  -2   70.14    6.80
  12  -3   2    1.08    1.85
 -12  -3  -2    1.52    1.58
  12  -3   2    1.05    1.62
  12   3   2    1.66    1.16
  12   3   2    0.95    1.34
 -12   3  -2    0.83    1.71
  12   3   2    1.76    0.99
  13  -3   2    9.19    2.97
 -13  -3  -2    6.41    2.33
  13  -3   2    9.48    2.83
  13   3   2    7.19    1.53
  13   3   2    6.41    1.74
  13   3   2    6.89    2.08
 -13   3  -2    8.40    2.67
 -13   3  -2    5.97    2.49
  14  -3   2    5.45    2.53
  14  -3   2    3.08    2.19
 -14  -3  -2    5.73    2.15
 -14   3  -2   -0.52    1.74
 -14   3  -2    2.72    2.32
  14   3   2    3.69    1.74
 -15  -3  -2   -0.03    1.98
  15  -3   2    2.37    2.49
 -15  -3  -2    2.87    2.23
  15  -3   2    4.70    2.45
  15   3   2    4.95    1.93
 -15   3  -2    5.85    2.61
 -15   3  -2    5.34    2.67
  16  -3   2    4.20    2.49
  16  -3   2    5.64    2.93
 -16  -3  -2   -0.04    2.17
 -16  -3  -2    0.51    2.09
 -16   3  -2    6.72    2.79
  16   3   2   -0.79    1.76
 -16   3  -2    0.82    2.99
  16  -4  -2    3.33    2.68
 -16  -4   2    4.97    2.71
  16  -4  -2    2.46    2.50
 -16   4   2    2.16    3.27
  16   4  -2   -0.54    1.37
  16   4  -2   -0.31    1.28
  15  -4  -2    0.89    1.76
 -15  -4   2    0.88    2.01
  15  -4  -2    1.00    2.00
  15   4  -2   -0.65    1.03
  15   4  -2    0.25    1.38
 -15   4   2   -0.72    1.95
 -15   4   2   -0.29    1.97
 -14  -4   2    3.66    2.28
  14  -4  -2    5.33    2.66
  14  -4  -2    3.97    2.22
 -14   4   2    6.64    2.65
  14   4  -2    2.77    1.55
  14   4  -2    3.87    1.62
  14   4  -2    5.25    1.62
 -14   4   2    3.44    2.24
  13  -4  -2   20.37    4.12
  13  -4  -2   21.04    5.06
 -13  -4   2   20.50    3.69
 -13   4   2   17.86    3.75
 -13   4   2   15.92    3.47
  13   4  -2   19.95    2.49
  13   4  -2   17.15    2.87
  13   4  -2   19.70    2.84
  12  -4  -2    4.77    2.11
 -12  -4   2    3.57    1.29
 -12  -4   2    2.21    1.69
  12  -4  -2    4.89    1.99
  12   4  -2    5.29    1.62
 -12   4   2    1.52    1.95
  12   4  -2    3.60    1.62
 -12   4   2    5.38    2.22
 -11  -4   2  261.46   18.82
  11  -4  -2  286.06   19.45
  11  -4  -2  302.37   19.86
  11   4  -2  260.12   17.89
  11   4  -2  246.07   18.57
 -11   4   2  329.52   19.60
  11   4  -2  254.52   18.22
 -10  -4   2    0.68    0.90
  10  -4  -2    1.85    1.66
 -10  -4   2    2.68    1.47
  10  -4  -2    1.43    1.59
  10   4  -2    1.83    1.20
 -10   4   2    0.51    1.56
  10   4  -2    1.57    0.99
  10   4  -2    2.32    1.35
 -10   4   2    1.58    1.45
  -9  -4   2   28.16    3.09
  -9  -4   2   24.30    2.45
   9   4  -2   24.77    2.47
   9   4  -2   26.79    2.92
   9   4  -2   26.09    2.75
  -8  -4   2  171.52   11.33
   8  -4  -2  182.27   12.73
   8  -4  -2  161.63   12.32
  -8  -4   2  180.37   11.90
  -8  -4   2  169.41   11.96
   8  -4  -2  170.44   12.66
  -8   4   2  168.47   12.22
   8   4  -2  158.94   11.32
  -8   4   2  178.61   12.31
   8   4  -2  179.60   11.83
   8   4  -2  158.25   12.19
  -8   4   2  183.96   12.35
   8   4  -2  179.48   11.61
  -7  -4   2   19.20    2.32
  -7  -4   2   21.83    2.34
   7  -4  -2   17.42    3.19
  -7  -4   2   20.98    1.87
   7  -4  -2   18.92    2.47
   7   4  -2   19.86    1.94
   7   4  -2   23.18    2.13
   7   4  -2   20.12    2.58
  -7   4   2   16.22    2.47
  -6  -4   2    6.13    1.42
  -6  -4   2    4.16    1.16
  -6  -4   2    4.10    1.03
  -6  -4   2    6.05    0.90
   6   4  -2    3.40    0.76
   6   4  -2    5.61    0.94
   6   4  -2    2.83    1.16
   5  -4  -2  220.54   13.51
  -5  -4   2  195.04   12.69
  -5  -4   2  184.48   13.16
   5  -4  -2  202.29   13.61
  -5  -4   2  187.83   13.22
  -5  -4   2  186.21   12.91
   5   4  -2  187.33   12.82
   5   4  -2  192.96   13.32
  -5   4   2  226.53   13.59
   5   4  -2  193.28   12.78
  -5   4   2  217.54   13.46
  -5   4   2  214.80   13.47
   4  -4  -2  300.60   19.35
  -4  -4   2  290.47   19.08
  -4  -4   2  272.76   18.73
  -4  -4   2  284.03   19.05
   4   4  -2  290.06   18.70
  -4   4   2  332.70   19.26
   4   4  -2  280.18   18.71
   4   4  -2  282.92   19.06
  -4   4   2  338.11   19.23
  -3  -4   2   19.45    1.92
   3  -4  -2   21.25    2.12
  -3  -4   2   17.63    1.87
  -3  -4   2   18.68    1.72
   3  -4  -2   23.18    2.00
   3   4  -2   20.50    1.48
   3   4  -2   17.47    1.82
   3   4  -2   18.07    1.63
  -3   4   2   23.78    2.09
  -3   4   2   23.12    1.98
   3   4  -2   16.85    1.83
  -3   4   2   21.97    1.93
   2  -4  -2 1927.21  117.09
  -2  -4   2 1901.76  117.21
   2  -4  -2 1888.82  117.26
  -2  -4   2 1879.80  117.28
  -2   4   2 1943.87  117.03
  -2   4   2 1890.59  117.14
  -2   4   2 2086.29  117.24
   2   4  -2 1744.32  117.17
   2   4  -2 1752.58  117.11
  -1  -4   2 2246.15  139.28
   1   4  -2 2200.60  139.25
  -1   4   2 2271.80  139.15
   1   4  -2 2278.17  139.38
   0  -4  -2 7298.76  451.97
   0  -4   2 7286.51  455.33
   0  -4  -2 7246.21  451.56
   0  -4   2 7226.09  456.21
   1  -4   2  811.52   55.25
  -1  -4  -2  918.36   55.01
  -1  -4  -2  948.77   55.13
   1  -4   2  864.71   55.29
   1  -4   2  915.44   55.40
  -1  -4  -2  901.09   54.89
   1  -4   2  824.07   55.33
   1   4   2 1011.09   54.99
   1   4   2  990.16   54.87
  -1   4  -2  897.37   55.42
  -1   4  -2  813.65   55.39
  -1   4  -2  785.33   55.24
  -1   4  -2  842.19   55.29
   2  -4   2   42.47    2.97
  -2  -4  -2   32.59    2.59
  -2  -4  -2   30.27    2.52
  -2   4  -2   38.64    3.04
  -2   4  -2   36.62    2.94
   2   4   2   29.34    2.54
   2   4   2   31.98    2.51
  -2   4  -2   41.42    3.04
  -2   4  -2   39.31    3.07
  -3  -4  -2    1.58    0.35
   3  -4   2    1.96    0.66
  -3  -4  -2    1.26    0.51
   3  -4   2    1.87    0.78
  -3  -4  -2    1.08    0.30
   3  -4   2    2.59    0.93
  -3  -4  -2    1.54    0.38
   3  -4   2    2.66    0.78
  -3   4  -2    2.37    0.92
  -3   4  -2    1.44    0.70
  -3   4  -2    1.78    0.80
  -3   4  -2    2.41    0.87
   3   4   2    2.22    0.70
  -4  -4  -2  224.25   13.47
   4  -4   2  230.83   14.17
  -4  -4  -2  205.72   13.40
   4  -4   2  213.17   14.34
   4  -4   2  231.61   14.17
  -4  -4  -2  200.42   13.66
   4  -4   2  206.85   14.21
  -4  -4  -2  193.73   13.74
  -4   4  -2  207.68   14.14
   4   4   2  201.61   13.89
  -4   4  -2  224.06   14.29
  -4   4  -2  213.09   14.14
   5  -4   2  356.11   21.80
   5  -4   2  328.97   21.96
   5  -4   2  333.18   21.86
  -5  -4  -2  335.74   21.02
  -5  -4  -2  331.02   21.43
  -5  -4  -2  356.77   21.14
   5   4   2  305.49   20.96
  -5   4  -2  312.66   21.70
  -5   4  -2  326.05   21.73
  -5   4  -2  350.15   21.93
   6  -4   2 1215.08   71.01
  -6  -4  -2 1063.63   70.13
   6  -4   2 1117.60   71.27
  -6  -4  -2 1162.80   70.48
   6  -4   2 1174.43   71.09
  -6  -4  -2 1134.45   70.00
  -6   4  -2 1023.79   70.65
   6   4   2 1165.55   70.00
  -6   4  -2 1077.16   70.72
  -7  -4  -2   33.23    2.64
   7  -4   2   37.22    3.78
   7  -4   2   36.54    3.42
  -7  -4  -2   25.81    2.79
   7  -4   2   33.69    3.55
  -7  -4  -2   28.15    3.28
   7   4   2   26.54    2.26
  -7   4  -2   32.47    3.46
   7   4   2   27.90    2.56
  -7   4  -2   32.25    3.38
   7   4   2   29.37    2.21
  -7   4  -2   29.24    3.40
  -8  -4  -2   75.70    5.74
  -8  -4  -2   72.06    5.81
  -8  -4  -2   76.18    5.36
  -8   4  -2   62.31    6.02
   8   4   2   84.22    5.49
   8   4   2   75.75    5.06
  -8   4  -2   56.28    5.84
   8   4   2   70.68    4.90
   9  -4   2  690.09   46.80
  -9  -4  -2  785.48   45.86
  -9  -4  -2  768.00   47.49
   9  -4   2  665.51   46.83
   9   4   2  778.63   45.52
  -9   4  -2  633.43   46.49
   9   4   2  782.35   45.93
  -9   4  -2  702.08   46.72
  10  -4   2  321.27   22.35
  10  -4   2  323.24   22.50
 -10  -4  -2  343.76   21.32
 -10  -4  -2  325.37   21.85
  10   4   2  323.58   21.36
 -10   4  -2  311.60   22.22
 -10   4  -2  318.08   22.30
  10   4   2  348.22   20.99
  10   4   2  323.66   20.75
 -11  -4  -2    1.59    1.03
  11  -4   2    2.16    1.56
 -11  -4  -2    1.82    1.41
  11  -4   2    2.50    1.80
 -11   4  -2    2.29    1.90
 -11   4  -2    0.39    1.46
  11   4   2    3.49    1.01
  11   4   2    2.75    1.28
  11   4   2    2.91    0.88
  12  -4   2    2.50    1.96
  12  -4   2   -1.02    1.29
 -12  -4  -2    0.17    1.39
 -12  -4  -2    2.08    1.07
  12   4   2    1.83    1.23
  12   4   2    1.58    0.87
  12   4   2    0.99    0.82
 -12   4  -2   -0.20    1.68
  13  -4   2  124.82   10.05
  13  -4   2  125.65   10.00
 -13  -4  -2  101.64    9.25
 -13   4  -2  108.22    9.63
  13   4   2  111.50    8.66
 -13   4  -2  122.93   10.11
  14  -4   2    5.48    2.70
  14  -4   2    5.41    2.57
 -14  -4  -2    1.66    1.84
 -14   4  -2    6.33    2.57
  14   4   2    1.27    1.51
  14   4   2    0.94    0.70
 -14   4  -2    2.99    2.20
  15  -4   2   10.20    3.32
 -15  -4  -2   13.20    3.27
 -15  -4  -2    9.69    2.89
  15  -4   2   13.23    3.56
 -15   4  -2   10.98    3.29
 -15   4  -2    9.21    3.21
 -16  -4  -2   61.53    7.02
  16  -4   2   80.08    8.09
 -16  -4  -2   63.96    7.23
  16  -4   2   76.47    7.83
 -16   4  -2   80.18    8.28
 -16   4  -2   71.50    7.80
  16  -5  -2    5.10    2.98
 -16  -5   2    8.99    3.15
  16  -5  -2    8.86    3.16
 -16   5   2    8.82    3.45
 -16   5   2    9.74    3.64
  15  -5  -2   31.62    5.19
 -15  -5   2   23.78    4.62
  15  -5  -2   29.30    5.35
 -15   5   2   33.88    5.56
 -15   5   2   32.08    5.34
  14  -5  -2    1.44    2.25
  14  -5  -2    1.82    2.25
 -14  -5   2    2.06    1.84
  14   5  -2    0.38    1.04
  14   5  -2   -0.28    1.15
 -14   5   2   -0.36    1.96
 -14   5   2    0.81    1.90
  13  -5  -2   64.38    6.91
  13  -5  -2   77.74    7.63
 -13  -5   2   62.72    5.36
 -13  -5   2   67.47    6.58
 -13   5   2   86.30    7.42
 -13   5   2   69.93    6.93
  13   5  -2   69.19    5.72
  13   5  -2   66.25    5.34
  12  -5  -2    1.18    1.86
 -12  -5   2    0.90    0.93
 -12  -5   2    0.87    1.40
  12  -5  -2    1.75    1.70
 -12   5   2    0.05    3.00
  12   5  -2    0.95    0.94
  12   5  -2    0.48    1.01
  12   5  -2    1.79    1.15
 -11  -5   2    0.33    0.84
  11  -5  -2    0.14    1.75
  11  -5  -2    3.73    1.93
 -11  -5   2    0.36    1.40
 -11   5   2    2.67    1.67
 -11   5   2    1.49    1.70
  11   5  -2    2.07    1.02
  11   5  -2    0.55    0.90
  11   5  -2    1.56    1.08
 -10  -5   2   20.98    2.97
  10  -5  -2   21.13    3.76
 -10  -5   2   20.76    2.26
  10  -5  -2   18.66    3.45
  10   5  -2   23.12    2.62
  10   5  -2   23.04    2.61
 -10   5   2   23.19    3.30
 -10   5   2   25.50    3.44
  10   5  -2   24.08    2.32
   9  -5  -2   81.78    7.33
  -9  -5   2   75.10    5.52
  -9  -5   2   73.69    6.15
   9  -5  -2   80.71    6.94
   9   5  -2   75.60    5.73
   9   5  -2   73.16    5.58
  -9   5   2   85.23    6.87
  -9   5   2   80.32    6.76
   9   5  -2   81.57    5.94
  -8  -5   2    2.32    1.14
   8  -5  -2   11.03    2.64
  -8  -5   2    3.47    1.24
  -8  -5   2    1.82    0.81
  -8  -5   2    4.68    1.65
   8   5  -2    2.84    0.89
   8   5  -2    1.83    1.01
   8   5  -2    2.62    1.38
  -8   5   2    8.30    2.04
   8   5  -2    3.50    0.92
  -7  -5   2    1.35    0.83
   7  -5  -2    0.62    1.31
   7  -5  -2    0.98    1.11
  -7  -5   2    1.39    0.92
   7  -5  -2    0.42    0.86
   7   5  -2    0.98    0.69
  -7   5   2    0.63    1.03
   7   5  -2    0.51    0.52
  -7   5   2    0.55    0.98
   7   5  -2    1.94    1.35
  -7   5   2    1.91    1.14
   7   5  -2    1.38    0.64
  -6  -5   2   16.58    1.91
   6  -5  -2   18.10    2.52
  -6  -5   2   17.32    2.11
  -6  -5   2   14.40    2.03
   6   5  -2   20.18    2.37
   6   5  -2   17.57    1.71
  -6   5   2   19.57    2.42
  -6   5   2   19.00    2.34
   6   5  -2   18.35    1.68
  -5  -5   2    0.73    0.76
  -5  -5   2    3.69    1.11
   5  -5  -2    6.08    1.44
  -5  -5   2    3.53    0.86
   5   5  -2    1.57    0.62
   5   5  -2    3.84    1.20
   5   5  -2    2.97    0.77
   4  -5  -2 1208.74   81.87
  -4  -5   2 1231.12   81.66
   4  -5  -2 1335.25   81.78
  -4  -5   2 1288.11   81.68
  -4  -5   2 1268.24   81.29
  -4   5   2 1381.36   81.80
  -4   5   2 1397.27   81.72
   4   5  -2 1351.84   81.21
   4   5  -2 1202.74   80.99
  -4   5   2 1377.12   81.89
   4   5  -2 1373.22   81.68
   3  -5  -2    1.89    0.81
   3  -5  -2    2.97    0.83
   3  -5  -2    4.55    0.97
  -3   5   2    2.69    0.86
  -3   5   2    2.04    0.74
  -3   5   2    3.23    0.81
   2  -5  -2  668.04   40.45
  -2  -5   2  618.46   40.67
  -2  -5   2  598.62   40.35
   2  -5  -2  643.78   40.50
  -2  -5   2  654.23   40.61
   2  -5  -2  613.18   40.61
  -2   5   2  704.95   40.63
   2   5  -2  636.06   40.56
   2   5  -2  632.35   40.24
  -2   5   2  667.71   40.59
   2   5  -2  640.09   40.65
  -2   5   2  679.33   40.40
   2   5  -2  643.27   40.15
  -1  -5   2 1310.66   85.30
   1  -5  -2 1289.75   85.30
  -1  -5   2 1410.34   85.48
   1  -5  -2 1313.12   85.16
   1  -5  -2 1297.89   85.35
  -1  -5   2 1427.75   85.65
  -1   5   2 1513.83   85.08
   1   5  -2 1400.45   85.64
  -1   5   2 1425.14   85.33
   1   5  -2 1383.62   85.25
  -1   5   2 1333.90   85.38
  -1   5   2 1399.36   85.17
   1   5  -2 1346.43   85.46
   1   5  -2 1394.65   85.19
   0  -5   2  137.09    8.90
   0  -5   2  139.85    9.06
   0  -5   2  127.08    8.82
   0  -5   2  131.02    8.87
   0  -5  -2  129.36    8.47
   0  -5  -2  129.00    8.66
   0  -5   2  133.25    8.77
   0  -5  -2  129.37    8.55
   0  -5  -2  129.93    8.72
   0   5  -2  141.67    8.82
   0   5  -2  122.66    8.89
   0   5  -2  144.42    8.89
   0   5  -2  127.55    9.09
   0   5   2  138.07    8.60
   0   5   2  130.49    8.79
   0   5   2  137.28    8.62
   1  -5   2 5427.19  320.40
   1  -5   2 5506.64  319.32
   1   5   2 4518.62  311.04
   1   5   2 4580.69  310.82
   2  -5   2   68.76    5.79
   2  -5   2   76.49    5.71
  -2  -5  -2   88.13    5.58
  -2  -5  -2   85.76    5.08
   2  -5   2   71.94    5.76
   2  -5   2   75.98    5.74
  -2  -5  -2   93.62    5.52
  -2   5  -2   78.62    5.76
   2   5   2   88.03    5.47
  -2   5  -2   78.78    5.89
  -2   5  -2   76.97    5.74
  -2   5  -2   75.38    5.79
   2   5   2   87.35    5.45
  -2   5  -2   67.75    5.80
   3  -5   2 1131.73   77.51
  -3  -5  -2 1247.04   77.04
   3  -5   2 1244.52   77.38
   3  -5   2 1157.51   77.45
  -3  -5  -2 1332.69   76.61
   3  -5   2 1263.19   77.40
  -3   5  -2 1318.83   77.60
   3   5   2 1238.26   77.09
  -3   5  -2 1184.00   77.48
  -3   5  -2 1273.76   77.65
  -3   5  -2 1244.67   77.44
  -4  -5  -2 2024.17  119.70
  -4  -5  -2 2208.01  119.51
   4  -5   2 1708.18  120.14
   4  -5   2 1731.05  120.05
   4  -5   2 1964.04  120.03
  -4  -5  -2 1979.30  119.64
   4  -5   2 1912.78  120.01
  -4   5  -2 1949.35  120.18
   4   5   2 1956.76  119.78
  -4   5  -2 1827.50  120.08
  -4   5  -2 1953.11  120.07
  -5  -5  -2   15.78    1.81
  -5  -5  -2   16.31    1.33
   5  -5   2   16.92    2.08
  -5  -5  -2   16.04    1.53
  -5  -5  -2   15.86    1.76
   5  -5   2   16.16    2.39
   5  -5   2   13.88    2.31
  -5   5  -2   16.99    2.27
  -5   5  -2   17.86    2.27
  -5   5  -2   18.24    2.33
  -6  -5  -2  200.09   13.94
   6  -5   2  239.21   15.13
   6  -5   2  258.32   16.33
  -6  -5  -2  205.92   14.39
  -6  -5  -2  190.53   14.16
   6  -5   2  242.29   16.00
  -6  -5  -2  211.45   14.56
  -6   5  -2  229.81   15.18
  -6   5  -2  231.60   16.76
  -7  -5  -2  201.61   14.00
  -7  -5  -2  204.36   14.29
   7  -5   2  232.75   15.04
   7  -5   2  219.77   14.78
   7  -5   2  236.77   15.21
   7   5   2  184.90   13.63
  -7   5  -2  207.71   14.74
  -7   5  -2  226.01   14.85
   8  -5   2    5.87    1.71
   8  -5   2    3.91    1.80
  -8   5  -2    5.17    1.90
  -8   5  -2    2.69    1.63
  -9  -5  -2  628.61   37.78
   9  -5   2  569.09   39.18
   9  -5   2  557.54   39.00
  -9  -5  -2  572.26   38.86
  -9   5  -2  568.20   38.88
   9   5   2  625.15   37.86
  -9   5  -2  668.31   39.23
 -10  -5  -2   16.04    2.03
  10  -5   2   25.53    3.75
 -10  -5  -2   18.17    2.75
  10  -5   2   25.34    3.91
  10   5   2   16.33    2.16
 -10   5  -2   23.40    3.47
 -11  -5  -2   33.06    3.05
  11  -5   2   32.88    4.32
 -11  -5  -2   34.43    3.91
  11  -5   2   32.42    4.32
  11   5   2   33.46    3.27
 -11   5  -2   31.75    4.24
 -11   5  -2   31.32    4.34
 -12  -5  -2    6.60    1.53
 -12  -5  -2    8.40    2.27
  12  -5   2   10.26    3.36
  12   5   2    7.81    2.00
 -12   5  -2    5.31    2.24
 -12   5  -2   10.45    2.89
  13  -5   2   75.01    7.46
  13  -5   2   80.49    7.56
 -13  -5  -2   62.61    6.60
 -13   5  -2   85.96    7.76
 -13   5  -2   72.02    7.36
  13   5   2   69.05    5.93
  14  -5   2  103.58    9.32
  14  -5   2  103.67    9.38
 -14  -5  -2   89.36    8.48
 -14   5  -2   92.06    8.92
 -14   5  -2  104.61    9.35
 -15  -5  -2   45.94    5.44
  15  -5   2   41.28    5.87
  15  -5   2   39.30    5.62
 -15   5  -2   40.90    5.69
 -15   5  -2   28.51    5.22
  16  -6  -2    2.08    3.86
 -16  -6   2    0.06    2.11
 -16   6   2    0.60    2.22
 -16   6   2    1.76    2.39
  16   6  -2    0.50    1.46
  15  -6  -2   11.83    3.71
  15  -6  -2    8.60    3.35
 -15  -6   2    9.86    2.94
 -15   6   2   12.72    3.36
 -15   6   2   14.74    3.64
 -14  -6   2   36.79    5.03
  14  -6  -2   47.59    5.77
  14  -6  -2   44.39    5.95
 -14   6   2   46.48    5.74
 -14   6   2   43.53    5.73
 -13  -6   2    3.80    1.96
  13  -6  -2    1.38    2.00
 -13  -6   2    3.12    1.16
  13  -6  -2   -0.22    2.10
  13   6  -2    1.64    0.94
  13   6  -2    2.50    1.16
  13   6  -2    1.65    0.79
 -13   6   2    0.81    1.69
 -13   6   2    0.81    1.71
  12  -6  -2   48.17    5.84
 -12  -6   2   46.28    3.91
 -12  -6   2   48.96    5.04
  12  -6  -2   60.30    8.68
 -12   6   2   61.16    5.74
 -12   6   2   50.19    5.50
  12   6  -2   42.66    3.82
  12   6  -2   46.53    4.13
  12   6  -2   49.45    3.86
  11  -6  -2  132.62   11.42
 -11  -6   2  135.75   10.54
 -11  -6   2  140.27    9.56
  11  -6  -2  134.21   11.30
  11   6  -2  133.25    9.49
  11   6  -2  145.92    9.68
 -11   6   2  163.09   11.40
  11   6  -2  141.88    9.81
 -11   6   2  157.13   11.29
 -10  -6   2   36.72    2.88
  10  -6  -2   35.12    4.29
  10  -6  -2   39.15    4.79
 -10  -6   2   35.03    3.68
  10   6  -2   30.19    2.95
 -10   6   2   40.02    4.44
  10   6  -2   30.81    2.97
 -10   6   2   37.05    4.24
  10   6  -2   30.95    2.79
  -9  -6   2  102.30    7.77
   9  -6  -2  100.50    8.83
   9  -6  -2  101.47    8.61
  -9  -6   2  116.13    7.13
  -9   6   2   89.07    8.14
   9   6  -2   99.96    8.38
   9   6  -2  110.19    7.31
   9   6  -2  107.28    7.28
  -9   6   2  102.79    8.43
   9   6  -2  107.06    7.27
  -8  -6   2   46.31    3.99
  -8  -6   2   42.70    3.71
   8  -6  -2   39.46    4.51
   8  -6  -2   32.64    4.53
   8   6  -2   40.74    3.18
   8   6  -2   39.61    4.19
  -8   6   2   31.72    4.01
   8   6  -2   41.45    3.29
   8   6  -2   41.81    3.44
  -8   6   2   39.10    4.25
  -7  -6   2  242.14   16.67
  -7  -6   2  263.15   17.19
  -7  -6   2  254.83   17.12
   7  -6  -2  269.26   17.78
   7  -6  -2  271.76   18.08
   7  -6  -2  245.86   17.83
   7   6  -2  263.90   16.35
   7   6  -2  250.12   16.44
  -7   6   2  292.90   17.60
   7   6  -2  238.46   17.22
   7   6  -2  237.60   16.29
  -7   6   2  256.93   17.33
   6  -6  -2  724.57   55.00
   6  -6  -2  839.52   54.36
   6  -6  -2  715.37   55.15
  -6  -6   2  937.45   54.30
  -6  -6   2  961.48   54.36
  -6  -6   2  872.88   53.71
   6   6  -2  868.66   53.64
  -6   6   2  816.48   54.21
   6   6  -2  931.53   53.44
  -6   6   2  870.78   54.47
   6   6  -2  873.30   53.51
  -6   6   2  882.72   54.50
   6   6  -2  854.25   54.25
  -5  -6   2  347.27   22.45
   5  -6  -2  361.46   22.62
   5  -6  -2  308.99   22.65
  -5  -6   2  335.48   22.44
  -5  -6   2  332.43   21.94
  -5   6   2  379.29   22.67
  -5   6   2  352.09   22.66
   5   6  -2  338.29   21.58
  -5   6   2  367.25   22.52
   5   6  -2  337.05   21.68
   5   6  -2  345.61   22.42
   4  -6  -2  496.53   34.48
   4  -6  -2  564.04   34.41
  -4  -6   2  537.02   33.91
  -4  -6   2  515.67   34.28
  -4  -6   2  511.28   34.35
  -4   6   2  601.58   34.52
  -4   6   2  586.72   34.33
   4   6  -2  539.84   34.23
   4   6  -2  512.42   33.62
  -4   6   2  593.83   34.56
   4   6  -2  490.15   33.47
   4   6  -2  538.54   34.20
   3  -6  -2  950.51   60.09
   3  -6  -2  943.54   59.87
   3  -6  -2  930.00   59.82
  -3  -6   2  933.93   59.61
  -3  -6   2  917.61   59.91
  -3  -6   2  883.60   59.97
   3   6  -2  950.66   59.35
   3   6  -2  975.69   59.92
  -3   6   2 1000.21   60.02
   3   6  -2  920.02   59.79
   3   6  -2  954.80   59.26
  -3   6   2 1028.59   59.83
  -3   6   2 1050.74   60.07
  -2  -6   2 1081.01   67.04
  -2  -6   2 1115.29   66.82
   2  -6  -2  967.13   66.84
  -2  -6   2 1115.95   67.21
   2  -6  -2  979.60   67.00
   2  -6  -2  998.39   66.78
  -2   6   2 1058.51   67.02
   2   6  -2 1112.97   67.00
  -2   6   2  967.04   66.70
  -2   6   2 1067.81   66.97
   2   6  -2 1143.10   66.62
  -2   6   2 1016.60   66.69
   2   6  -2 1209.29   67.26
   2   6  -2 1192.79   66.59
  -1  -6   2  814.93   50.66
  -1  -6   2  817.95   50.20
   1  -6  -2  792.43   50.18
  -1  -6   2  826.83   50.37
   1  -6  -2  765.36   50.38
  -1  -6   2  783.18   50.47
   1  -6  -2  766.78   50.32
  -1   6   2  779.35   50.18
   1   6  -2  792.08   50.49
  -1   6   2  818.64   50.32
   1   6  -2  867.45   50.28
  -1   6   2  767.95   50.43
   1   6  -2  804.69   50.70
   1   6  -2  879.95   50.24
   0  -6  -2  282.43   20.73
   0  -6  -2  297.77   20.56
   0  -6   2  351.08   20.98
   0  -6  -2  280.05   20.64
   0  -6   2  339.07   20.92
   0  -6   2  341.14   20.83
   0  -6  -2  292.01   20.49
   0  -6   2  365.17   21.20
   0  -6   2  340.91   20.97
   0   6  -2  371.78   20.95
   0   6  -2  355.22   21.08
   0   6  -2  344.83   21.27
   0   6   2  301.69   20.60
   0   6  -2  369.90   20.91
   0   6   2  294.51   20.84
   0   6   2  314.84   20.60
   1  -6   2 2295.39  147.24
  -1  -6  -2 2401.75  146.86
   1  -6   2 2389.55  147.31
   1  -6   2 2287.87  147.13
   1  -6   2 2323.58  147.15
  -1   6  -2 2430.14  147.25
  -1   6  -2 2464.32  147.50
   1   6   2 2337.29  146.78
  -1   6  -2 2481.96  147.28
  -1   6  -2 2443.83  147.21
  -1   6  -2 2360.50  147.15
   1   6   2 2272.98  147.00
   2  -6   2   11.42    1.61
   2  -6   2   12.50    1.55
  -2  -6  -2    8.07    1.17
  -2  -6  -2   10.26    0.85
   2  -6   2   10.54    1.80
   2  -6   2   10.53    1.76
  -2  -6  -2    8.09    1.41
  -2   6  -2    9.77    1.75
  -2   6  -2   11.95    1.58
   2   6   2    8.67    1.13
  -2   6  -2   11.76    1.78
  -2   6  -2   11.01    1.60
   2   6   2    7.76    1.24
  -2   6  -2   11.09    1.65
  -3  -6  -2  758.05   47.24
   3  -6   2  721.62   48.28
  -3  -6  -2  761.52   47.77
   3  -6   2  735.87   48.20
   3  -6   2  788.12   48.11
   3  -6   2  807.60   48.19
  -3  -6  -2  706.77   47.77
   3   6   2  739.03   47.71
  -3   6  -2  777.38   48.33
  -3   6  -2  795.70   48.28
  -3   6  -2  807.19   48.20
   4  -6   2  351.64   21.79
   4  -6   2  311.86   21.94
  -4  -6  -2  322.42   21.37
   4  -6   2  341.99   21.73
  -4  -6  -2  320.83   21.33
   4  -6   2  305.84   21.80
  -4   6  -2  348.66   21.95
  -4   6  -2  348.50   21.97
  -4   6  -2  376.00   21.93
   4   6   2  309.10   21.36
  -5  -6  -2   25.63    2.55
   5  -6   2   30.56    2.92
  -5  -6  -2   23.38    2.05
   5  -6   2   26.53    2.77
  -5  -6  -2   22.60    2.43
   5  -6   2   24.46    3.04
   5  -6   2   26.69    2.99
  -5   6  -2   25.19    3.00
   5   6   2   25.14    2.58
  -5   6  -2   32.73    3.12
  -5   6  -2   29.28    3.04
   6  -6   2  220.11   15.28
  -6  -6  -2  204.79   14.52
   6  -6   2  226.82   15.13
  -6  -6  -2  203.88   14.17
  -6  -6  -2  208.80   14.62
   6  -6   2  220.88   15.44
  -6  -6  -2  209.02   13.79
  -6   6  -2  236.65   15.35
  -6   6  -2  238.65   15.34
  -6   6  -2  247.15   15.31
   7  -6   2  377.54   24.46
  -7  -6  -2  350.67   23.14
   7  -6   2  377.79   24.31
  -7  -6  -2  349.34   23.49
  -7  -6  -2  352.34   22.65
  -7  -6  -2  343.41   23.37
  -7   6  -2  391.14   24.20
  -7   6  -2  359.03   24.09
  -8  -6  -2 1201.08   72.79
  -8  -6  -2 1166.33   72.91
   8  -6   2 1121.82   73.73
   8  -6   2 1156.02   73.95
  -8  -6  -2 1192.28   73.63
  -8  -6  -2 1131.27   72.75
  -8   6  -2 1228.22   73.73
  -8   6  -2 1101.03   73.56
   9  -6   2  423.97   29.99
   9  -6   2  415.03   30.09
  -9  -6  -2  444.90   29.16
  -9  -6  -2  467.39   28.45
  -9   6  -2  441.90   29.94
  -9   6  -2  512.21   30.26
 -10  -6  -2    3.84    0.99
  10  -6   2    1.55    1.71
  10  -6   2    4.69    1.96
 -10  -6  -2    6.05    1.71
 -10   6  -2    6.34    2.37
 -10   6  -2    2.72    1.85
  11  -6   2   38.21    5.03
 -11  -6  -2   39.90    3.30
 -11  -6  -2   39.19    4.18
  11  -6   2   35.10    4.76
 -11   6  -2   43.04    5.46
 -11   6  -2   41.57    4.94
 -12  -6  -2   17.80    3.16
 -12  -6  -2   14.52    1.99
  12  -6   2   15.63    3.52
  12  -6   2   16.29    3.50
 -12   6  -2   20.63    3.94
 -12   6  -2   13.10    3.33
  13  -6   2    3.39    2.09
  13  -6   2    2.74    2.37
 -13  -6  -2    0.20    1.83
 -13   6  -2   -1.32    1.55
 -13   6  -2   -0.59    1.93
  14  -6   2    0.94    2.33
  14  -6   2    1.26    2.30
 -14  -6  -2    2.31    1.84
 -14   6  -2    2.56    2.04
 -14   6  -2   -1.41    1.91
  15  -6   2    9.66    3.28
  15  -6   2    6.19    3.06
 -15  -6  -2    1.44    2.14
 -15   6  -2    6.51    4.28
 -15   6  -2    6.62    3.34
  16  -7  -2    6.93    3.34
  16  -7  -2    8.12    3.25
 -16   7   2    6.39    3.02
  15  -7  -2   28.31    5.23
  15  -7  -2   20.88    4.69
 -15  -7   2   24.71    4.45
 -15   7   2   19.44    4.31
 -15   7   2   22.88    4.58
  14  -7  -2    2.66    2.50
  14  -7  -2    2.62    2.58
 -14  -7   2    6.49    2.30
 -14   7   2    1.49    2.15
 -14   7   2    3.94    2.40
 -13  -7   2    3.45    2.04
  13  -7  -2    6.95    3.05
  13  -7  -2    3.60    2.43
 -13   7   2    6.73    2.57
 -13   7   2    6.75    2.62
  12  -7  -2   40.49    5.33
  12  -7  -2   45.93    5.22
 -12  -7   2   30.68    4.18
 -12   7   2   45.95    5.24
  12   7  -2   36.71    3.42
 -12   7   2   52.46    5.45
  11  -7  -2   63.24    7.05
 -11  -7   2   75.90    6.30
  11  -7  -2   66.38    6.86
 -11   7   2   67.13    6.71
 -11   7   2   64.53    6.57
  11   7  -2   84.73    5.40
 -10  -7   2   20.60    2.75
  10   7  -2   13.73    1.79
  10   7  -2   15.47    1.42
   9  -7  -2   35.82    4.43
   9  -7  -2   39.70    4.60
  -9  -7   2   33.16    3.36
  -9   7   2   30.68    4.04
  -9   7   2   32.60    3.87
   9   7  -2   31.36    2.45
   9   7  -2   32.80    2.64
   9   7  -2   29.95    3.83
   8  -7  -2  120.70    9.74
   8  -7  -2  101.24    9.73
  -8  -7   2  142.65    8.91
  -8   7   2  121.36    9.48
  -8   7   2  101.05    9.15
   8   7  -2  133.42    8.15
   8   7  -2  143.82    9.63
   7  -7  -2  284.29   19.52
  -7  -7   2  295.11   19.09
  -7  -7   2  299.11   19.08
   7  -7  -2  251.35   19.51
  -7  -7   2  290.95   18.47
   7   7  -2  284.25   18.26
  -7   7   2  304.10   19.37
   7   7  -2  281.34   19.09
  -7   7   2  269.89   19.07
   6  -7  -2  143.14    9.54
   6  -7  -2  130.91    9.90
  -6  -7   2  128.17    9.32
  -6  -7   2  119.33    8.65
   6  -7  -2  120.65    9.65
  -6   7   2  133.95    9.88
  -6   7   2  150.33    9.65
   6   7  -2  106.48    9.05
  -5  -7   2  134.18   10.37
  -5  -7   2  147.86   10.98
  -5  -7   2  153.78   10.95
   5  -7  -2  154.74   11.29
   5  -7  -2  166.45   11.55
  -5   7   2  181.09   11.33
  -5   7   2  189.19   11.37
  -5   7   2  171.85   11.04
   5   7  -2  136.30   10.74
  -4  -7   2   28.61    2.62
   4  -7  -2   29.30    2.95
  -4  -7   2   30.41    3.08
   4  -7  -2   29.62    2.91
  -4  -7   2   29.59    3.00
   4  -7  -2   27.29    3.20
  -4   7   2   31.13    3.14
  -4   7   2   32.58    2.97
   4   7  -2   31.40    2.09
   4   7  -2   31.61    2.97
   4   7  -2   33.13    2.15
  -4   7   2   30.72    3.06
   4   7  -2   31.17    2.97
   3  -7  -2  853.14   59.21
  -3  -7   2  961.34   59.60
  -3  -7   2  965.63   59.46
   3  -7  -2  826.14   59.44
  -3  -7   2 1038.84   59.18
   3  -7  -2  863.32   59.29
  -3   7   2  919.08   59.43
  -3   7   2  958.09   59.52
   3   7  -2 1004.48   59.37
  -3   7   2  923.58   59.18
   3   7  -2 1041.99   59.53
   3   7  -2  975.23   58.71
   3   7  -2  977.69   58.69
  -2  -7   2   69.70    5.64
   2  -7  -2   85.24    6.05
  -2  -7   2   70.09    5.82
  -2  -7   2   67.66    5.95
   2  -7  -2   87.61    5.79
   2  -7  -2   83.98    5.85
   2   7  -2   74.45    6.02
  -2   7   2   94.81    5.68
  -2   7   2   90.52    5.76
   2   7  -2   74.12    5.39
   2   7  -2   75.32    5.84
  -2   7   2   88.72    5.94
   2   7  -2   73.79    5.42
  -2   7   2   97.34    6.18
   1  -7  -2  349.94   20.34
  -1  -7   2  276.07   20.15
  -1  -7   2  288.63   20.28
  -1  -7   2  272.23   20.41
  -1  -7   2  306.03   20.04
   1  -7  -2  348.89   20.38
  -1  -7   2  294.99   20.23
   1  -7  -2  357.62   20.16
  -1   7   2  364.96   20.20
  -1   7   2  364.28   20.28
   1   7  -2  307.81   20.62
   1   7  -2  299.51   20.36
   1   7  -2  284.10   20.24
   1   7  -2  301.99   20.04
   0  -7   2    1.36    0.85
   0  -7   2    0.25    0.60
   0  -7   2    0.00    0.49
   0  -7   2    0.57    0.63
   0  -7  -2    3.92    0.88
   0  -7  -2    1.22    0.70
   0  -7  -2    1.41    0.48
   0  -7   2    1.04    0.59
   0  -7  -2    0.40    0.42
   0   7  -2    1.93    0.88
   0   7  -2    1.30    0.62
   0   7  -2    2.39    1.15
   0   7   2    0.86    0.81
   0   7   2    1.23    0.65
   0   7   2    1.08    0.64
  -1  -7  -2  914.71   53.96
   1  -7   2  823.49   54.36
  -1  -7  -2  822.32   54.29
   1  -7   2  860.12   54.39
   1  -7   2  832.71   54.48
   1  -7   2  850.44   54.54
  -1  -7  -2  836.64   54.23
  -1   7  -2  925.10   54.84
  -1   7  -2  886.30   54.45
   1   7   2  857.50   54.03
   1   7   2  892.52   54.33
  -1   7  -2  871.46   54.44
   1   7   2  866.94   53.82
  -1   7  -2  904.44   54.53
  -2  -7  -2 1212.02   73.67
   2  -7   2 1104.07   74.59
   2  -7   2 1161.68   74.54
  -2  -7  -2 1202.70   74.14
  -2  -7  -2 1207.36   73.70
   2  -7   2 1116.11   74.48
  -2  -7  -2 1229.82   74.31
   2  -7   2 1115.32   74.39
  -2   7  -2 1159.30   74.52
  -2   7  -2 1218.32   74.81
  -2   7  -2 1219.08   74.48
   2   7   2 1257.18   74.06
   2   7   2 1245.52   74.23
  -2   7  -2 1226.18   74.54
   3  -7   2  432.45   29.65
   3  -7   2  442.06   29.57
  -3  -7  -2  454.95   29.24
   3  -7   2  447.87   29.81
   3  -7   2  453.06   29.55
  -3  -7  -2  467.24   29.36
  -3  -7  -2  474.76   28.72
  -3   7  -2  478.82   29.63
  -3   7  -2  483.92   29.94
   3   7   2  468.24   29.18
   3   7   2  470.18   29.16
  -3   7  -2  469.28   29.62
  -3   7  -2  453.45   29.71
  -4  -7  -2  545.45   31.59
   4  -7   2  431.09   31.99
   4  -7   2  494.61   32.38
  -4  -7  -2  532.61   31.64
   4  -7   2  430.35   31.87
  -4   7  -2  525.67   32.00
   4   7   2  480.23   31.46
  -4   7  -2  523.09   32.19
  -4   7  -2  501.30   32.45
  -5  -7  -2   60.19    5.06
  -5  -7  -2   57.12    4.52
  -5  -7  -2   64.98    5.11
   5  -7   2   77.54    5.65
   5  -7   2   78.82    5.61
   5  -7   2   68.12    5.77
   5  -7   2   68.57    5.89
  -5   7  -2   75.16    5.80
  -5   7  -2   79.13    5.92
   5   7   2   55.16    5.05
  -6  -7  -2  312.07   19.88
   6  -7   2  298.38   20.53
  -6  -7  -2  313.11   19.31
  -6  -7  -2  307.68   19.84
   6  -7   2  286.54   20.60
  -6   7  -2  294.64   20.32
  -6   7  -2  316.86   20.58
   6   7   2  295.49   19.97
  -7  -7  -2 1199.34   81.24
  -7  -7  -2 1269.72   81.37
   7  -7   2 1374.48   82.45
  -7  -7  -2 1170.44   80.81
   7  -7   2 1381.23   82.29
  -7   7  -2 1328.74   81.99
  -7   7  -2 1385.11   82.20
   8  -7   2   45.20    4.98
   8  -7   2   42.80    4.83
  -8  -7  -2   36.79    3.63
  -8  -7  -2   41.89    2.89
  -8  -7  -2   46.88    4.03
  -8   7  -2   49.02    4.85
  -8   7  -2   36.58    4.45
   9  -7   2  428.35   28.97
  -9  -7  -2  381.84   27.52
   9  -7   2  426.40   28.77
  -9  -7  -2  427.54   26.75
  -9   7  -2  473.22   28.92
  -9   7  -2  437.06   28.67
  10  -7   2    5.11    2.15
 -10  -7  -2    1.93    1.27
 -10  -7  -2    3.77    0.75
  10  -7   2    5.28    2.19
 -10   7  -2    3.82    2.07
 -10   7  -2    3.46    2.09
 -11  -7  -2   25.62    2.30
 -11  -7  -2   27.51    3.32
  11  -7   2   30.97    4.78
  11  -7   2   25.41    5.37
 -11   7  -2   26.72    4.05
 -11   7  -2   29.06    4.16
 -12  -7  -2    1.02    0.83
  12  -7   2    1.56    2.09
 -12  -7  -2    2.74    1.67
  12  -7   2    3.45    2.34
 -12   7  -2    1.15    1.81
 -12   7  -2    3.50    2.30
  13  -7   2   38.14    5.15
  13  -7   2   28.87    5.16
 -13  -7  -2   33.52    4.33
 -13   7  -2   33.14    5.00
 -13   7  -2   29.77    4.61
  14  -7   2    2.64    2.81
 -14  -7  -2    3.56    2.10
  14  -7   2    1.86    2.44
 -14   7  -2    2.08    2.37
 -14   7  -2    3.44    2.44
  15  -7   2    2.50    2.68
 -15  -7  -2    0.73    1.92
 -15   7  -2   -0.95    2.24
 -15   7  -2    3.42    2.87
  15  -8  -2  161.89   13.87
 -15  -8   2  134.78   11.50
  15  -8  -2  135.89   13.65
 -15   8   2  139.64   15.62
 -14  -8   2    7.47    2.44
  14  -8  -2    5.59    3.06
  14  -8  -2    4.77    3.04
 -14   8   2    3.72    2.45
 -14   8   2    4.09    2.74
  13  -8  -2    6.09    3.11
 -13  -8   2    3.96    2.11
  13  -8  -2    9.83    3.04
 -13   8   2    6.01    2.96
 -13   8   2    5.19    2.40
  12  -8  -2   62.81    6.74
 -12  -8   2   69.03    6.18
  12  -8  -2   62.29    7.02
 -12   8   2   68.69    6.79
 -12   8   2   58.81    6.63
 -11  -8   2  132.40    9.89
  11  -8  -2  131.26   11.69
  11  -8  -2  132.90   11.29
 -11   8   2  123.10   10.57
 -11   8   2  125.38   13.27
  11   8  -2  136.86    8.68
  10  -8  -2   11.35    3.16
  10  -8  -2   10.79    3.08
 -10  -8   2   14.21    2.37
  10   8  -2   13.67    1.34
  10   8  -2   13.98    3.11
 -10   8   2    9.05    2.54
 -10   8   2   10.25    2.70
  -9  -8   2   82.13    6.06
   9  -8  -2   81.32    7.27
   9  -8  -2   78.55    7.39
  -9   8   2   67.25    6.60
  -9   8   2   72.93    6.64
   9   8  -2   74.32    6.64
   8  -8  -2  397.21   28.24
  -8  -8   2  454.51   26.96
   8  -8  -2  412.31   28.08
  -8   8   2  405.76   27.63
   8   8  -2  466.40   27.86
  -8   8   2  372.24   27.62
  -7  -8   2    4.62    1.64
   7  -8  -2    2.36    1.59
  -7  -8   2    4.80    1.77
   7  -8  -2    3.36    1.92
  -7  -8   2    4.31    1.26
  -7   8   2    8.22    2.01
   7   8  -2    8.03    1.97
  -7   8   2    3.54    1.47
  -6  -8   2   10.65    1.67
   6  -8  -2   12.39    2.46
  -6  -8   2   10.61    2.16
  -6  -8   2   13.66    2.31
   6  -8  -2   15.72    2.80
  -6   8   2   18.38    2.33
  -6   8   2   17.75    2.56
   5  -8  -2  734.74   47.65
  -5  -8   2  754.94   45.84
   5  -8  -2  687.90   46.66
  -5  -8   2  717.93   46.49
  -5  -8   2  767.11   46.47
   5  -8  -2  761.18   46.52
   5   8  -2  676.93   46.16
  -5   8   2  707.51   46.28
  -5   8   2  726.74   47.24
  -5   8   2  769.09   46.64
   4  -8  -2  195.18   12.29
  -4  -8   2  160.88   11.75
   4  -8  -2  191.57   12.71
  -4  -8   2  169.05   12.32
   4  -8  -2  175.44   12.47
  -4  -8   2  176.18   12.26
   4  -8  -2  203.03   12.39
   4   8  -2  161.42   12.00
  -4   8   2  188.15   12.48
  -4   8   2  183.15   12.43
   4   8  -2  160.11   12.05
  -4   8   2  184.98   12.12
  -3  -8   2  115.05    7.43
  -3  -8   2  124.28    8.05
   3  -8  -2   90.64    7.68
   3  -8  -2   98.82    7.49
   3  -8  -2   99.98    7.58
  -3  -8   2  124.60    7.86
   3  -8  -2   99.61    7.88
   3   8  -2  118.91    7.87
  -3   8   2  100.13    7.64
   3   8  -2  121.48    7.00
  -3   8   2   90.72    7.67
  -3   8   2   94.82    7.33
   3   8  -2  110.65    7.63
  -3   8   2   98.92    7.39
   2  -8  -2 1129.15   70.42
  -2  -8   2 1076.73   70.66
  -2  -8   2 1094.26   70.49
   2  -8  -2 1149.15   70.30
  -2  -8   2 1094.09   70.24
   2  -8  -2 1193.59   70.67
   2  -8  -2 1164.11   70.61
  -2   8   2 1155.11   70.43
   2   8  -2 1175.99   70.77
   2   8  -2 1097.13   69.97
  -2   8   2 1049.15   70.02
  -2   8   2 1163.84   70.66
  -2   8   2 1135.63   70.26
   2   8  -2 1093.25   70.42
  -1  -8   2 1220.40   76.83
   1  -8  -2 1198.69   76.72
   1  -8  -2 1249.42   76.78
  -1  -8   2 1197.55   76.49
  -1  -8   2 1150.19   76.98
   1  -8  -2 1270.11   76.56
  -1  -8   2 1215.31   76.74
   1  -8  -2 1287.81   76.80
  -1  -8   2 1256.54   76.75
   1   8  -2 1235.87   76.90
  -1   8   2 1281.79   76.99
  -1   8   2 1218.07   76.61
  -1   8   2 1217.76   76.57
   1   8  -2 1230.15   76.54
   1   8  -2 1217.24   77.15
   0  -8  -2  148.64    9.49
   0  -8   2  114.45    9.25
   0  -8   2  114.52    9.36
   0  -8  -2  160.88    9.28
   0  -8  -2  154.90    9.22
   0  -8  -2  142.41    9.32
   0  -8  -2  156.46    9.38
   0   8   2  148.38    9.21
   0   8  -2  136.46    9.63
   0   8  -2  113.40    9.28
   0   8  -2  129.82    9.86
  -1  -8  -2   71.70    5.21
   1  -8   2   85.82    5.94
  -1  -8  -2   71.78    5.20
   1  -8   2   77.61    5.73
  -1  -8  -2   73.36    5.36
   1  -8   2   83.26    5.77
  -1  -8  -2   67.76    5.48
   1  -8   2   81.19    5.94
   1   8   2   72.87    5.10
   1   8   2   67.77    5.31
  -1   8  -2   79.40    5.74
   1   8   2   72.05    5.63
  -1   8  -2   79.90    5.88
  -1   8  -2   89.03    6.32
  -2  -8  -2 1522.42   88.69
  -2  -8  -2 1496.82   88.50
   2  -8   2 1358.65   88.97
   2  -8   2 1408.81   88.92
   2  -8   2 1400.22   88.77
   2  -8   2 1300.25   88.78
  -2  -8  -2 1440.88   88.09
  -2  -8  -2 1505.24   87.98
  -2   8  -2 1484.80   89.27
  -2   8  -2 1390.74   88.86
   2   8   2 1444.49   87.90
   2   8   2 1422.49   88.56
   2   8   2 1340.95   88.31
  -2   8  -2 1382.74   88.84
  -2   8  -2 1429.12   88.80
  -3  -8  -2  675.63   42.23
   3  -8   2  681.08   43.15
  -3  -8  -2  716.11   42.95
   3  -8   2  672.60   43.26
   3  -8   2  665.76   43.40
   3  -8   2  690.29   43.26
  -3  -8  -2  719.87   42.82
  -3   8  -2  663.67   43.12
   3   8   2  620.73   42.63
  -3   8  -2  749.05   43.63
  -3   8  -2  708.68   43.33
  -3   8  -2  631.41   43.04
   3   8   2  642.59   42.60
  -4  -8  -2  132.29    8.70
   4  -8   2  115.22    8.93
   4  -8   2  113.96    8.89
  -4  -8  -2  131.33    8.78
  -4  -8  -2  143.44    8.14
  -4   8  -2  109.72    8.90
   4   8   2  136.93    8.70
  -4   8  -2  113.90    8.89
  -4   8  -2  111.11    9.05
  -4   8  -2  123.10    9.32
  -5  -8  -2   71.46    4.53
   5  -8   2   63.95    5.84
  -5  -8  -2   69.11    5.24
  -5  -8  -2   74.04    5.26
   5  -8   2   56.17    5.49
   5  -8   2   51.72    5.56
  -5   8  -2   51.69    5.30
  -5   8  -2   68.95    5.85
  -5   8  -2   64.29    5.65
   5   8   2   72.49    5.27
  -6  -8  -2    6.45    1.10
  -6  -8  -2    9.68    1.82
  -6  -8  -2    5.26    1.50
   6  -8   2    7.44    2.10
   6  -8   2    4.94    1.95
   6   8   2    6.90    1.73
  -6   8  -2    4.37    1.64
  -6   8  -2    8.88    2.21
  -7  -8  -2    4.35    1.44
   7  -8   2    1.25    1.70
   7  -8   2   -0.23    1.30
  -7   8  -2    1.25    1.50
  -7   8  -2    1.66    1.51
   8  -8   2    1.64    1.66
  -8  -8  -2    3.61    1.48
  -8  -8  -2    3.84    1.19
   8  -8   2   -0.28    1.36
  -8   8  -2    3.43    1.95
  -8   8  -2    2.86    1.63
   9  -8   2    1.28    1.72
  -9  -8  -2   -1.04    0.88
   9  -8   2    1.43    1.89
  -9   8  -2    0.00    1.14
  -9   8  -2    1.75    1.48
 -10  -8  -2   84.26    6.44
  10  -8   2   67.83    7.13
  10  -8   2   72.80    7.36
 -10   8  -2   92.41    7.60
 -10   8  -2   68.54    6.99
 -11  -8  -2    2.37    1.54
  11  -8   2    4.05    2.23
  11  -8   2    1.19    1.78
 -11   8  -2    3.09    1.97
 -11   8  -2    0.63    1.72
 -12  -8  -2    0.85    1.52
  12  -8   2    1.59    2.10
  12  -8   2    1.09    2.31
 -12   8  -2   -0.68    1.83
 -12   8  -2    1.67    2.36
  13  -8   2    3.78    2.71
 -13  -8  -2    2.48    1.95
  13  -8   2    4.52    2.74
 -13   8  -2    2.92    2.43
 -13   8  -2    2.65    2.26
 -14  -8  -2   40.44    4.89
  14  -8   2   35.92    5.99
  14  -8   2   31.97    5.66
 -14   8  -2   35.02    5.72
 -14   8  -2   32.84    5.68
  15  -8   2   78.37    9.10
 -15  -8  -2   85.95    8.27
  15  -8   2   95.80    9.50
 -15   8  -2   95.37    9.42
 -15   8  -2   99.60    9.57
  15  -9  -2    6.92    3.44
  15  -9  -2    9.55    3.81
 -15  -9   2    3.75    2.33
 -15   9   2    5.03    3.06
 -15   9   2   14.59    3.93
 -14  -9   2  129.62   10.82
  14  -9  -2  129.11   12.03
  14  -9  -2  137.51   11.98
 -14   9   2  140.00   11.74
 -14   9   2  142.73   11.90
 -13  -9   2  107.15    9.00
  13  -9  -2  100.56    9.81
  13  -9  -2   99.63   10.04
 -13   9   2  114.16    9.77
 -13   9   2  107.07    9.65
  12  -9  -2    0.91    1.78
 -12  -9   2   -0.91    1.40
  12  -9  -2    1.11    1.80
 -12   9   2    0.80    1.78
 -12   9   2    1.50    1.80
 -11  -9   2    1.63    1.34
  11  -9  -2    3.42    2.22
  11  -9  -2    1.75    1.98
 -11   9   2    2.94    1.95
 -11   9   2    2.39    1.87
 -10  -9   2   33.89    3.56
  10  -9  -2   36.49    4.84
  10  -9  -2   37.99    5.01
 -10   9   2   28.55    4.01
 -10   9   2   26.21    4.01
  10   9  -2   37.98    4.31
  -9  -9   2    7.13    1.74
   9  -9  -2    8.96    2.74
   9  -9  -2    8.50    2.83
  -9   9   2    9.92    2.61
  -9   9   2    9.54    2.42
   9   9  -2    9.39    2.48
  -8  -9   2  204.80   14.96
   8  -9  -2  217.96   16.33
   8  -9  -2  234.74   16.73
   8   9  -2  241.68   15.98
  -8   9   2  226.83   16.15
  -8   9   2  239.33   16.02
   7  -9  -2  224.44   16.37
  -7  -9   2  234.78   14.98
   7  -9  -2  210.51   16.02
   7   9  -2  224.40   15.63
  -7   9   2  250.16   15.89
  -7   9   2  213.96   15.89
  -6  -9   2    2.58    1.31
   6  -9  -2    1.69    1.35
  -6  -9   2    2.37    1.06
   6  -9  -2    2.65    1.81
  -6  -9   2    2.23    1.21
  -6   9   2    1.69    1.24
   6   9  -2    1.95    1.19
  -6   9   2    2.86    1.26
   5  -9  -2  268.40   17.18
   5  -9  -2  232.81   17.26
  -5  -9   2  274.25   17.20
   5  -9  -2  245.78   17.52
  -5  -9   2  257.42   17.23
  -5  -9   2  267.49   16.54
   5   9  -2  265.97   16.96
  -5   9   2  216.55   16.74
   5   9  -2  240.91   17.28
  -5   9   2  274.98   17.32
  -5   9   2  239.10   17.20
   4  -9  -2  110.30    8.71
   4  -9  -2  109.36    7.83
   4  -9  -2  118.43    8.37
  -4  -9   2  107.11    7.88
  -4  -9   2  105.50    7.44
   4  -9  -2  110.01    7.85
  -4   9   2  104.63    7.62
  -4   9   2   99.56    7.60
  -4   9   2   97.80    8.47
   4   9  -2   99.25    7.65
   4   9  -2   98.75    7.70
  -4   9   2  111.39    7.96
  -3  -9   2  319.72   19.75
   3  -9  -2  308.00   19.90
   3  -9  -2  321.66   20.39
   3  -9  -2  300.82   19.97
  -3  -9   2  312.51   20.31
  -3  -9   2  323.32   20.12
   3  -9  -2  312.21   20.25
  -3   9   2  307.55   20.05
  -3   9   2  291.41   19.77
  -3   9   2  308.03   19.69
   3   9  -2  293.64   19.89
   3   9  -2  306.85   19.24
   3   9  -2  291.81   20.08
  -3   9   2  267.88   20.09
  -2  -9   2  154.14   11.92
   2  -9  -2  208.46   12.50
   2  -9  -2  195.15   12.13
  -2  -9   2  175.79   12.46
  -2  -9   2  176.21   12.25
   2  -9  -2  190.45   12.24
   2  -9  -2  188.07   12.43
   2   9  -2  166.98   12.42
   2   9  -2  156.28   12.08
  -2   9   2  188.02   12.19
  -2   9   2  180.83   12.05
  -2   9   2  182.59   12.48
  -1  -9   2    8.17    1.79
  -1  -9   2    8.55    1.51
  -1  -9   2    7.85    1.49
  -1  -9   2    6.75    1.22
  -1  -9   2    7.14    1.47
   1   9  -2    8.85    1.39
   1   9  -2   11.42    2.04
  -1   9   2    3.74    1.28
   1   9  -2    9.58    1.74
  -1   9   2    5.51    1.24
   0  -9   2   32.39    2.80
   0  -9   2   33.29    3.06
   0  -9  -2   30.37    2.85
   0  -9   2   32.31    2.89
   0  -9  -2   28.34    2.54
   0  -9  -2   26.97    2.63
   0  -9   2   30.27    2.87
   0  -9  -2   28.66    2.66
   0  -9  -2   31.71    2.54
   0  -9   2   30.51    3.06
   0   9   2   25.30    2.56
   0   9  -2   28.44    2.96
   0   9  -2   28.78    3.29
   0   9   2   29.02    3.02
   0   9   2   27.38    2.50
  -1  -9  -2  234.23   16.76
   1  -9   2  295.21   17.29
   1  -9   2  302.90   17.13
  -1  -9  -2  228.89   16.42
  -1  -9  -2  248.04   16.44
  -1  -9  -2  221.34   16.33
   1  -9   2  284.15   17.08
  -1  -9  -2  259.44   16.60
   1  -9   2  286.92   17.81
   1   9   2  216.30   16.78
   1   9   2  238.43   16.30
  -1   9  -2  278.63   17.05
  -1   9  -2  279.13   17.59
  -1   9  -2  249.03   17.05
   1   9   2  249.03   16.58
  -2  -9  -2  209.00   14.80
  -2  -9  -2  225.01   15.23
  -2  -9  -2  217.74   15.39
   2  -9   2  250.03   15.96
   2  -9   2  250.63   15.70
   2  -9   2  241.35   15.81
   2  -9   2  258.48   15.81
  -2  -9  -2  204.83   14.87
  -2   9  -2  239.85   15.76
   2   9   2  224.84   15.14
   2   9   2  217.96   15.37
  -2   9  -2  264.34   15.87
  -2   9  -2  240.65   15.61
   2   9   2  221.13   14.67
  -2   9  -2  259.93   16.28
  -3  -9  -2  880.08   52.50
   3  -9   2  814.21   52.86
  -3  -9  -2  871.85   52.65
   3  -9   2  825.40   52.95
  -3  -9  -2  844.67   51.92
   3  -9   2  804.24   52.76
   3  -9   2  812.55   53.09
   3   9   2  887.91   52.35
   3   9   2  870.15   52.44
  -3   9  -2  854.06   53.28
  -3   9  -2  787.16   52.71
  -3   9  -2  817.26   52.96
  -3   9  -2  777.04   52.76
   4  -9   2   19.73    2.69
  -4  -9  -2   17.08    2.25
  -4  -9  -2   17.23    2.24
   4  -9   2   24.97    2.67
   4  -9   2   21.64    2.95
  -4  -9  -2   15.78    1.72
  -4   9  -2   23.34    2.75
  -4   9  -2   22.84    2.99
  -4   9  -2   21.22    2.69
  -4   9  -2   24.41    2.80
   4   9   2   20.60    2.29
   5  -9   2   15.16    2.89
   5  -9   2   18.29    3.17
  -5  -9  -2   14.24    1.62
  -5  -9  -2   14.76    2.25
  -5  -9  -2   16.37    2.26
   5   9   2    9.71    2.03
  -5   9  -2   24.33    2.76
  -5   9  -2   22.86    2.91
  -5   9  -2   21.02    3.06
  -6  -9  -2   11.66    1.48
  -6  -9  -2   14.79    2.33
   6  -9   2    8.72    2.20
   6  -9   2    8.01    2.40
  -6  -9  -2   15.46    2.58
  -6   9  -2   10.35    2.41
   6   9   2   11.42    2.17
  -6   9  -2   12.30    2.80
  -7  -9  -2  725.38   47.30
   7  -9   2  712.85   48.19
  -7  -9  -2  802.98   46.58
  -7  -9  -2  741.33   47.28
   7  -9   2  695.17   47.93
  -7   9  -2  698.75   47.75
  -7   9  -2  842.00   48.40
   7   9   2  721.87   47.35
  -8  -9  -2  114.46    8.56
   8  -9   2  139.77   10.50
   8  -9   2  131.80   10.14
  -8  -9  -2  112.24    9.16
  -8   9  -2  126.97    9.89
  -8   9  -2  128.24   10.05
   9  -9   2  178.96   13.62
  -9  -9  -2  172.71   11.94
   9  -9   2  185.53   13.53
  -9   9  -2  153.83   12.92
  -9   9  -2  184.44   13.47
 -10  -9  -2    4.88    1.62
  10  -9   2    6.03    2.46
  10  -9   2    3.12    1.72
 -10   9  -2    5.22    2.14
  11  -9   2    1.10    1.83
 -11  -9  -2   -0.47    1.28
  11  -9   2    0.04    1.66
 -11   9  -2    2.00    1.79
 -11   9  -2    3.63    2.00
 -12  -9  -2    1.15    1.43
  12  -9   2    1.18    2.04
  12  -9   2    2.70    2.10
 -12   9  -2   -0.07    1.75
 -12   9  -2    2.22    2.36
  13  -9   2   19.85    4.44
 -13  -9  -2   23.48    3.53
  13  -9   2   14.79    3.99
 -13   9  -2   20.24    4.07
 -13   9  -2   18.36    4.19
 -14  -9  -2   13.40    2.93
  14  -9   2   15.43    4.25
  14 -10  -2   12.76    5.73
 -14 -10   2   17.65    3.31
  14 -10  -2   15.20    6.36
 -14  10   2   11.01    3.99
 -14  10   2   11.30    3.78
  13 -10  -2    8.30    3.08
  13 -10  -2    7.63    3.00
 -13  10   2    4.87    2.84
 -13  10   2    9.65    3.48
 -12 -10   2   18.58    3.32
  12 -10  -2   22.83    4.71
  12 -10  -2   22.36    4.46
 -12  10   2   21.66    4.39
 -12  10   2   23.23    4.23
 -11 -10   2   91.45    7.20
  11 -10  -2   88.06    8.56
  11 -10  -2   82.43    8.22
 -11  10   2   79.54    8.04
 -11  10   2   86.97    8.00
  10 -10  -2    1.02    2.04
  10 -10  -2    1.16    1.79
 -10 -10   2    2.30    1.42
 -10  10   2    1.85    1.78
 -10  10   2   -0.92    1.85
  10  10  -2    2.67    1.87
   9 -10  -2   61.29    6.86
   9 -10  -2   70.47    7.02
  -9 -10   2   69.67    5.60
   9  10  -2   73.65    6.50
  -9  10   2   66.91    6.67
  -9  10   2   73.14    6.50
   8 -10  -2  105.60    8.83
   8 -10  -2   96.63    8.36
  -8 -10   2   77.80    8.01
   8  10  -2   90.17    7.79
  -8  10   2  102.41    8.33
  -8  10   2  108.99    8.13
  -7 -10   2  180.20   12.96
   7 -10  -2  190.31   14.53
   7 -10  -2  182.89   14.22
  -7  10   2  221.59   14.07
  -7  10   2  197.38   14.22
   7  10  -2  201.84   13.80
   6 -10  -2   48.15    5.14
   6 -10  -2   51.29    5.11
  -6  10   2   46.63    4.83
  -6  10   2   46.01    4.52
  -5 -10   2    2.03    0.97
  -5 -10   2    2.14    1.41
  -5 -10   2    3.00    1.36
   5 -10  -2    3.82    1.58
   5 -10  -2    3.85    1.86
   5  10  -2    2.26    1.30
  -5  10   2    5.60    1.63
  -5  10   2    4.69    1.67
  -5  10   2    4.40    1.44
   5  10  -2    4.29    1.46
  -4 -10   2   57.18    4.80
   4 -10  -2   53.34    4.62
  -4 -10   2   57.47    4.98
   4 -10  -2   52.51    6.75
   4 -10  -2   51.39    4.93
   4 -10  -2   55.51    4.69
  -4 -10   2   61.56    4.45
  -4  10   2   46.38    4.81
  -4  10   2   52.58    4.73
  -4  10   2   51.75    4.47
   4  10  -2   50.77    4.56
  -4  10   2   52.90    4.54
   4  10  -2   55.18    5.07
  -3 -10   2   38.21    3.77
   3 -10  -2   43.38    3.85
   3 -10  -2   39.68    4.07
  -3 -10   2   44.41    3.63
  -3 -10   2   45.21    4.17
   3 -10  -2   42.87    4.07
   3  10  -2   42.61    3.07
  -3  10   2   41.05    3.70
  -3  10   2   40.06    3.49
  -3  10   2   41.38    4.49
   3  10  -2   39.32    3.74
   3  10  -2   36.68    3.90
   2 -10  -2   10.49    1.89
   2 -10  -2    8.89    1.87
   2 -10  -2    7.91    1.50
   2 -10  -2    8.58    1.65
  -2  10   2    9.01    1.61
  -2  10   2    9.83    1.67
  -2  10   2    9.71    2.04
   1 -10  -2  917.47   55.69
  -1 -10   2  887.49   55.86
  -1 -10   2  926.43   55.61
  -1 -10   2  848.97   55.82
  -1 -10   2  904.98   56.24
   1 -10  -2  881.72   55.88
  -1 -10   2  889.99   55.94
   1 -10  -2  929.86   55.97
   1 -10  -2  865.52   55.81
  -1  10   2  878.92   56.20
   1  10  -2  827.74   56.28
  -1  10   2  901.99   55.69
   1  10  -2  892.26   55.61
   1  10  -2  839.40   55.96
  -1  10   2  917.65   55.76
   0 -10   2  243.15   14.55
   0 -10  -2  199.71   14.18
   0 -10  -2  184.63   14.38
   0 -10   2  253.42   14.76
   0 -10   2  246.37   14.74
   0 -10   2  231.29   14.76
   0 -10  -2  194.39   14.30
   0 -10  -2  195.99   14.23
   0 -10   2  252.47   15.10
   0  10  -2  240.12   14.90
   0  10  -2  248.76   14.62
   0  10   2  197.27   14.27
   0  10   2  178.45   14.56
   0  10  -2  220.32   15.75
   0  10   2  196.32   14.11
  -1 -10  -2  250.59   15.94
  -1 -10  -2  237.45   15.97
   1 -10   2  232.98   16.34
   1 -10   2  254.12   16.52
   1 -10   2  265.28   16.71
   1 -10   2  240.65   16.62
  -1 -10  -2  256.27   16.08
  -1 -10  -2  244.44   16.32
  -1 -10  -2  239.18   15.85
  -1  10  -2  237.99   16.39
   1  10   2  236.04   15.73
  -1  10  -2  253.33   17.06
   1  10   2  260.41   16.13
   1  10   2  241.50   16.46
  -1  10  -2  245.69   16.59
   2 -10   2  169.01   10.87
   2 -10   2  157.04   10.50
  -2 -10  -2  140.40    9.50
  -2 -10  -2  148.54   10.05
   2 -10   2  154.86   10.63
  -2 -10  -2  136.90   10.20
   2 -10   2  169.54   10.68
  -2 -10  -2  128.40    9.67
   2  10   2  144.29   10.28
  -2  10  -2  154.30   10.62
  -2  10  -2  150.05   10.96
  -2  10  -2  146.86   10.50
   2  10   2  137.00    9.42
   2  10   2  145.54    9.94
   3 -10   2   -0.31    0.87
   3 -10   2    1.01    1.02
  -3 -10  -2    1.44    0.95
   3 -10   2    0.84    1.25
  -3 -10  -2    0.85    1.02
  -3  10  -2    2.08    1.14
  -3  10  -2    1.62    1.16
   3  10   2   -0.32    0.92
   3  10   2    0.20    0.79
  -3  10  -2    1.53    1.21
  -3  10  -2    2.92    1.62
   4 -10   2   64.82    5.43
  -4 -10  -2   57.99    4.80
   4 -10   2   66.67    5.78
  -4 -10  -2   52.02    4.85
  -4 -10  -2   53.91    4.20
   4  10   2   54.04    4.66
   4  10   2   55.25    4.68
  -4  10  -2   65.38    5.29
  -4  10  -2   64.19    5.26
  -4  10  -2   61.52    5.63
   5 -10   2   26.18    3.77
  -5 -10  -2   27.63    2.44
   5 -10   2   29.85    3.78
  -5 -10  -2   26.22    3.06
  -5 -10  -2   32.72    3.29
  -5  10  -2   25.28    3.36
  -5  10  -2   28.93    3.45
   5  10   2   28.20    3.11
  -5  10  -2   28.28    3.65
  -6 -10  -2    9.73    2.15
   6 -10   2   12.78    2.80
  -6 -10  -2    9.63    1.45
   6 -10   2    6.98    2.40
  -6 -10  -2   10.88    2.15
  -6  10  -2   14.45    2.80
  -6  10  -2   15.03    2.74
  -6  10  -2   10.29    2.62
  -7 -10  -2  105.93    8.62
   7 -10   2  109.71    8.99
   7 -10   2  109.12    9.12
  -7 -10  -2  104.58    7.32
  -7 -10  -2  101.10    8.15
  -7  10  -2  119.73    9.17
   7  10   2   90.93    8.03
  -7  10  -2  117.83    8.87
  -8 -10  -2   52.12    3.97
   8 -10   2   41.58    5.31
   8 -10   2   44.90    5.52
  -8  10  -2   43.01    4.95
  -8  10  -2   47.77    5.38
   9 -10   2   38.20    7.63
  -9 -10  -2   36.12    3.46
  -9  10  -2   35.71    6.13
  -9  10  -2   35.72    4.55
 -10 -10  -2   51.45    4.67
  10 -10   2   53.41    6.19
  10 -10   2   50.60    5.80
 -10  10  -2   56.30    5.91
 -10  10  -2   49.91    5.92
  11 -10   2    0.82    2.14
  11 -10   2    0.12    1.57
 -11 -10  -2    0.27    1.33
 -11  10  -2    1.00    2.06
 -11  10  -2    2.70    2.23
  12 -10   2    3.76    2.61
  12 -10   2    1.07    2.72
 -12 -10  -2    6.53    1.96
 -12  10  -2    2.59    2.38
 -12  10  -2    5.62    2.84
 -13 -10  -2    7.88    2.28
  13 -10   2   10.41    3.48
  13 -10   2   10.42    3.77
 -13  10  -2    8.13    3.38
 -13  10  -2   13.48    4.04
  14 -10   2   18.30    4.78
 -14 -10  -2   16.71    3.39
  14 -10   2   13.71    3.93
 -14  10  -2   12.32    3.85
 -14  10  -2   19.23    4.64
 -14 -11   2   30.43    4.41
  14 -11  -2   34.85    6.29
  14 -11  -2   35.22    6.04
 -14  11   2   40.78    8.71
 -14  11   2   41.78    5.91
  13 -11  -2   11.18    3.85
  13 -11  -2    9.02    3.50
 -13 -11   2   15.29    3.10
 -13  11   2   10.34    3.54
 -13  11   2   10.63    3.41
  12 -11  -2   18.84    4.13
 -12 -11   2   18.18    3.34
  12 -11  -2   22.28    4.70
 -12  11   2   22.22    4.48
 -12  11   2   22.16    4.16
  11 -11  -2   47.96    6.14
  11 -11  -2   43.68    5.42
 -11 -11   2   35.12    4.17
 -11  11   2   39.89    5.30
 -11  11   2   46.72    5.49
  10 -11  -2   74.89    7.66
 -10 -11   2   66.16    5.82
  10 -11  -2   78.41    7.52
 -10  11   2   80.91    6.97
  10  11  -2   63.79    6.53
 -10  11   2   61.79    6.81
   9 -11  -2    0.32    2.25
  -9 -11   2    0.00    1.15
   9 -11  -2    1.79    2.78
  -9  11   2    2.55    2.05
   9  11  -2    1.15    1.66
  -9  11   2    0.91    1.46
  -8 -11   2    9.29    1.75
   8 -11  -2    5.33    2.52
   8 -11  -2    4.10    2.18
  -8  11   2    5.37    2.02
  -8  11   2    5.33    2.33
   8  11  -2    4.86    2.07
   7 -11  -2  817.34   55.50
  -7 -11   2  832.85   54.13
   7 -11  -2  855.99   55.85
   7  11  -2  874.71   54.95
  -7  11   2  884.05   55.58
  -7  11   2  907.05   55.09
   6 -11  -2  452.95   30.36
   6 -11  -2  449.83   30.15
  -6 -11   2  464.50   28.97
  -6  11   2  463.88   29.58
   6  11  -2  466.26   29.55
  -6  11   2  427.88   30.00
  -6  11   2  439.88   29.49
   5 -11  -2  112.24    9.41
  -5 -11   2  128.99    8.46
   5 -11  -2  109.89    9.21
  -5 -11   2  136.34    9.22
  -5  11   2  108.15    9.16
   5  11  -2  124.74    8.82
   5  11  -2  133.49    8.97
  -5  11   2  103.46    8.58
  -5  11   2  107.86    8.66
  -4 -11   2  151.33   10.63
   4 -11  -2  162.00   11.42
  -4 -11   2  153.00   11.09
  -4 -11   2  153.55   11.36
   4 -11  -2  168.18   11.60
  -4  11   2  159.79   10.76
   4  11  -2  139.84   10.82
  -4  11   2  158.63   11.48
   4  11  -2  147.78   11.00
  -4  11   2  152.59   10.90
   3 -11  -2  190.52   13.37
   3 -11  -2  197.35   13.16
  -3 -11   2  201.03   13.22
  -3 -11   2  195.82   13.44
  -3 -11   2  199.46   12.91
   3 -11  -2  176.55   13.32
   3 -11  -2  194.24   13.01
   3  11  -2  176.56   13.23
  -3  11   2  191.25   13.08
   3  11  -2  187.65   12.22
  -3  11   2  186.44   12.96
  -3  11   2  173.22   13.35
   3  11  -2  192.31   13.62
  -2 -11   2   50.33    4.60
  -2 -11   2   52.38    4.29
  -2 -11   2   49.04    4.21
  -2 -11   2   52.74    4.46
   2  11  -2   43.50    3.70
  -2  11   2   40.49    4.04
   2  11  -2   48.94    4.42
   2  11  -2   55.10    4.89
  -1 -11   2 1036.39   65.81
   1 -11  -2 1075.80   65.79
  -1 -11   2  985.98   65.77
   1 -11  -2 1081.37   65.95
   1 -11  -2 1087.77   65.65
  -1 -11   2 1048.86   66.21
  -1 -11   2 1035.00   66.44
   1 -11  -2 1110.01   65.97
   1  11  -2 1009.86   66.35
  -1  11   2 1093.17   65.74
  -1  11   2 1071.42   66.27
   1  11  -2 1010.37   65.95
   1  11  -2  986.47   65.47
  -1  11   2 1030.44   65.57
   0 -11  -2  305.03   18.45
   0 -11   2  266.39   18.75
   0 -11   2  282.61   18.55
   0 -11  -2  287.83   18.72
   0 -11  -2  304.97   18.48
   0 -11  -2  305.93   18.63
   0 -11   2  272.33   18.98
   0 -11   2  274.90   18.72
   0  11   2  290.08   19.01
   0  11   2  265.84   18.20
   0  11   2  286.01   18.49
   0  11  -2  276.59   19.31
   0  11  -2  255.00   18.78
   0  11  -2  279.65   18.57
  -1 -11  -2  563.22   34.13
   1 -11   2  561.18   34.69
  -1 -11  -2  530.72   33.97
   1 -11   2  525.06   34.77
   1 -11   2  520.75   34.52
  -1 -11  -2  530.95   34.16
  -1 -11  -2  550.53   34.54
  -1 -11  -2  559.25   34.22
   1  11   2  560.80   34.25
   1  11   2  558.73   34.76
  -1  11  -2  504.58   35.12
  -1  11  -2  525.67   34.54
  -1  11  -2  542.77   34.89
   1  11   2  512.62   33.82
  -2 -11  -2  806.53   49.00
  -2 -11  -2  725.52   48.66
  -2 -11  -2  761.71   49.19
  -2 -11  -2  827.96   48.81
  -2 -11  -2  748.90   48.38
   2 -11   2  799.95   49.45
   2 -11   2  861.44   49.85
  -2  11  -2  766.34   49.42
  -2  11  -2  791.21   49.58
  -2  11  -2  740.67   49.94
   2  11   2  777.08   48.86
   2  11   2  739.15   48.30
   2  11   2  765.93   49.24
  -3 -11  -2 1185.29   74.75
  -3 -11  -2 1198.16   75.44
  -3 -11  -2 1256.76   75.26
   3 -11   2 1245.08   75.83
   3 -11   2 1234.15   76.05
   3  11   2 1211.38   75.07
   3  11   2 1215.62   75.29
  -3  11  -2 1179.68   75.73
  -3  11  -2 1173.52   75.53
  -3  11  -2 1201.80   75.77
  -3  11  -2 1112.88   76.11
   4 -11   2  461.18   30.05
   4 -11   2  474.33   29.87
  -4 -11  -2  456.75   29.16
  -4 -11  -2  440.89   29.29
  -4 -11  -2  491.32   28.63
   4  11   2  446.74   29.01
  -4  11  -2  423.28   30.04
   4  11   2  448.23   29.00
  -4  11  -2  430.00   29.58
  -4  11  -2  443.48   29.51
   5 -11   2  214.26   16.01
  -5 -11  -2  219.72   15.50
  -5 -11  -2  242.10   14.74
   5 -11   2  236.28   16.41
  -5  11  -2  207.31   16.15
   5  11   2  228.92   15.31
  -5  11  -2  231.07   15.84
  -5  11  -2  230.01   15.91
   6 -11   2    1.12    1.69
  -6 -11  -2    2.58    0.91
  -6 -11  -2    2.57    1.32
   6 -11   2    0.77    1.58
  -6 -11  -2    1.42    1.34
  -6  11  -2    1.83    1.57
  -6  11  -2    0.63    1.40
  -6  11  -2    0.25    1.57
   6  11   2    0.92    1.14
  -7 -11  -2   78.04    7.53
   7 -11   2   89.52    8.12
   7 -11   2   90.05    7.96
  -7 -11  -2   87.42    6.23
  -7  11  -2   76.53    7.71
  -7  11  -2  103.68    7.89
  -7  11  -2   90.69    7.63
   7  11   2   87.46    7.14
  -8 -11  -2    0.94    0.99
   8 -11   2    0.79    1.64
   8 -11   2    2.62    2.12
  -8  11  -2    2.56    2.09
  -8  11  -2    2.48    1.81
  -8  11  -2    2.40    1.70
   9 -11   2   38.94    5.06
  -9 -11  -2   45.21    3.91
   9 -11   2   31.74    5.03
  -9  11  -2   33.21    4.94
  -9  11  -2   38.56    4.87
 -10 -11  -2   46.28    4.43
  10 -11   2   52.40    6.13
  10 -11   2   59.42    6.11
 -10  11  -2   41.97    5.69
 -10  11  -2   50.93    5.74
 -11 -11  -2    3.74    1.71
  11 -11   2    5.58    2.70
  11 -11   2    4.96    2.81
 -11  11  -2    9.06    3.18
 -11  11  -2    5.59    2.67
  12 -11   2    6.87    2.97
 -12 -11  -2   20.18    3.21
  12 -11   2   11.11    3.68
 -12  11  -2   10.86    3.29
 -12  11  -2   10.86    3.37
 -13 -11  -2  186.30   13.54
 -13  11  -2  163.43   14.21
 -13 -12   2   14.34    3.01
 -13  12   2    8.85    3.75
 -13  12   2   16.59    4.08
  12 -12  -2    4.08    2.87
 -12 -12   2    1.95    1.86
  12 -12  -2    2.51    2.76
 -12  12   2    4.65    2.56
 -12  12   2    2.57    2.52
  11 -12  -2  131.34   11.88
 -11 -12   2  132.38   10.12
  11 -12  -2  144.24   11.93
 -11  12   2  135.45   11.17
 -11  12   2  140.52   11.80
  10 -12  -2    5.68    2.84
 -10 -12   2    4.24    1.62
  10 -12  -2    8.28    3.03
 -10  12   2    4.74    2.60
  10  12  -2    3.63    1.85
 -10  12   2    5.99    2.55
  -9 -12   2   22.04    2.95
   9 -12  -2   27.07    4.43
   9 -12  -2   24.12    4.63
  -9  12   2   29.97    4.77
  -9  12   2   28.91    4.02
   9  12  -2   25.76    3.77
   8 -12  -2    4.70    2.53
  -8 -12   2    1.76    1.27
   8 -12  -2    3.95    2.11
  -8  12   2    4.14    2.10
   8  12  -2    1.89    1.70
  -8  12   2    5.59    2.10
   7 -12  -2    7.20    2.60
   7 -12  -2    4.63    2.05
  -7  12   2    5.88    2.01
  -7  12   2    7.77    2.42
   7  12  -2    7.24    2.13
  -7  12   2    4.63    1.95
   6 -12  -2    5.61    2.02
   6 -12  -2    9.59    2.60
   6  12  -2   11.37    2.38
  -6  12   2    5.32    1.83
  -6  12   2    8.81    2.13
  -6  12   2    6.87    2.14
   5 -12  -2    4.88    1.88
   5 -12  -2    4.07    1.92
  -5 -12   2    1.98    1.19
   5  12  -2    2.33    1.45
   5  12  -2    2.66    1.47
  -5  12   2    1.34    1.70
  -5  12   2    0.31    1.08
  -5  12   2    2.05    1.58
   4 -12  -2   31.68    4.07
  -4 -12   2   39.75    4.27
   4 -12  -2   32.45    3.94
  -4 -12   2   32.76    3.35
  -4  12   2   35.04    3.71
   4  12  -2   36.55    3.89
  -4  12   2   36.12    3.44
   4  12  -2   38.84    3.87
  -4  12   2   32.47    4.10
   3 -12  -2  110.84    9.76
   3 -12  -2  104.41    8.47
  -3 -12   2  109.55    8.02
   3 -12  -2  107.39    8.38
  -3 -12   2  114.62    8.35
  -3  12   2  110.66    8.76
  -3  12   2  109.32    8.18
   3  12  -2  108.98    8.55
   3  12  -2  115.46    8.27
  -3  12   2  102.37    8.11
  -2 -12   2    3.28    1.47
   2 -12  -2    2.48    1.32
  -2 -12   2    4.41    1.41
   2 -12  -2    3.86    1.50
   2 -12  -2    2.70    1.21
   2 -12  -2    4.56    1.42
  -2  12   2    2.24    1.29
   2  12  -2    3.59    1.53
  -2  12   2    0.03    1.00
   2  12  -2    2.99    1.65
   2  12  -2    2.82    0.88
  -2  12   2    2.35    1.53
   1 -12  -2  188.34   12.71
   1 -12  -2  189.87   12.98
  -1 -12   2  185.05   12.91
   1 -12  -2  191.13   12.84
  -1 -12   2  190.35   12.95
   1 -12  -2  186.23   12.96
  -1 -12   2  181.20   12.92
   1  12  -2  184.67   13.53
  -1  12   2  193.22   13.43
  -1  12   2  188.16   12.79
   1  12  -2  184.61   13.08
  -1  12   2  192.21   12.68
   1  12  -2  178.95   12.53
   0 -12  -2  191.35   13.15
   0 -12   2  186.32   13.33
   0 -12  -2  182.72   12.81
   0 -12  -2  187.83   12.81
   0 -12   2  211.34   13.09
   0 -12  -2  184.11   12.96
   0 -12   2  206.89   13.31
   0  12  -2  185.71   12.98
   0  12   2  181.82   12.88
   0  12   2  180.63   12.61
   0  12  -2  203.99   13.97
   0  12  -2  193.71   13.41
  -1 -12  -2  245.01   15.88
   1 -12   2  237.10   16.26
   1 -12   2  243.14   16.57
  -1 -12  -2  248.81   15.72
  -1 -12  -2  236.74   15.92
  -1 -12  -2  237.16   16.25
   1 -12   2  254.11   16.50
  -1 -12  -2  249.51   15.95
  -1  12  -2  234.54   17.01
   1  12   2  231.48   15.52
   1  12   2  240.67   15.95
  -1  12  -2  235.33   16.69
   1  12   2  241.40   16.57
  -1  12  -2  242.04   16.58
  -2 -12  -2    0.92    0.96
  -2 -12  -2    1.15    0.70
  -2 -12  -2    2.28    1.02
  -2 -12  -2    1.14    0.81
  -2 -12  -2   -0.87    0.85
   2 -12   2   -1.76    1.10
   2 -12   2    1.02    1.18
   2  12   2    0.44    0.49
  -2  12  -2   -0.92    1.39
   2  12   2    0.01    1.17
  -2  12  -2    1.01    1.26
   2  12   2    1.21    1.06
  -2  12  -2    1.00    1.06
  -3 -12  -2   77.81    5.76
   3 -12   2   71.73    6.51
  -3 -12  -2   72.35    5.93
   3 -12   2   67.73    6.23
  -3 -12  -2   82.24    5.43
   3  12   2   73.08    5.62
  -3  12  -2   70.52    6.74
  -3  12  -2   63.14    6.18
   3  12   2   66.98    5.81
  -4 -12  -2    3.41    1.40
   4 -12   2    2.84    1.74
   4 -12   2    3.80    1.70
  -4 -12  -2    2.74    1.33
  -4 -12  -2    1.77    0.92
  -4  12  -2    0.42    1.50
   4  12   2    0.84    1.24
  -4  12  -2    2.55    1.64
  -4  12  -2    0.64    1.37
  -5 -12  -2  145.12   10.60
  -5 -12  -2  142.04   10.71
   5 -12   2  146.27   11.56
   5 -12   2  152.01   11.35
  -5 -12  -2  148.81    9.93
  -5  12  -2  138.47   11.53
  -5  12  -2  153.76   11.10
  -5  12  -2  157.22   11.26
   6 -12   2  381.85   27.58
  -6 -12  -2  399.95   26.90
  -6 -12  -2  408.12   27.12
  -6 -12  -2  446.99   26.11
   6 -12   2  403.78   27.97
   6  12   2  423.10   26.90
  -6  12  -2  421.16   27.53
  -6  12  -2  370.89   27.78
  -6  12  -2  426.51   27.48
  -7 -12  -2   51.45    3.87
   7 -12   2   39.47    5.07
   7 -12   2   42.36    5.54
  -7  12  -2   50.73    5.58
  -7  12  -2   51.71    5.25
   7  12   2   44.86    4.71
  -7  12  -2   52.66    5.26
  -8 -12  -2    6.00    1.43
   8 -12   2    4.81    2.44
   8 -12   2    6.34    2.70
  -8  12  -2   10.05    3.01
  -8  12  -2    9.64    2.64
  -8  12  -2    7.35    2.28
   8  12   2    5.89    2.09
   9 -12   2  110.43    9.91
   9 -12   2  123.80   10.49
  -9  12  -2  106.16    9.89
  -9  12  -2  110.69    9.61
  -9  12  -2  115.01    9.62
 -10 -12  -2    9.18    1.93
  10 -12   2    4.07    2.48
  10 -12   2    8.05    3.06
 -10  12  -2    4.59    2.40
 -10  12  -2    5.55    2.51
 -10  12  -2    7.90    2.79
  11 -12   2    6.73    3.01
  11 -12   2    9.33    3.40
 -11 -12  -2   15.41    2.48
 -11  12  -2    8.73    3.32
 -11  12  -2    9.46    3.28
 -12 -12  -2    6.97    2.10
  12 -12   2    7.77    3.47
  12 -12   2    8.26    3.02
 -12  12  -2    6.84    3.07
 -12  12  -2    6.66    3.29
  13 -12   2    3.03    2.74
  13 -12   2   -0.80    2.55
 -13  12  -2    0.56    2.77
 -13  12  -2   -0.56    2.51
 -13 -13   2    5.57    2.29
  13 -13  -2    7.20    3.46
  13 -13  -2    5.85    2.95
 -13  13   2    4.40    2.89
 -13  13   2    1.97    2.88
  12 -13  -2   50.04    6.49
 -12 -13   2   38.91    4.79
  12 -13  -2   47.38    6.58
 -12  13   2   37.37    6.35
 -12  13   2   51.53    5.91
  11 -13  -2  163.40   13.29
 -11 -13   2  139.51   11.39
  11 -13  -2  175.37   13.90
 -11  13   2  150.62   12.49
  11  13  -2  170.74   12.80
 -11  13   2  168.76   13.54
 -10 -13   2    6.95    1.94
  10 -13  -2    6.67    3.05
  10 -13  -2   11.67    3.48
  10  13  -2    5.37    2.29
 -10  13   2    8.13    2.80
 -10  13   2    6.16    2.51
  -9 -13   2   38.98    3.79
   9 -13  -2   36.38    5.00
   9 -13  -2   33.36    5.17
  -9  13   2   29.21    4.35
  -9  13   2   37.03    4.61
  -9  13   2   44.87    5.47
   9  13  -2   33.33    4.36
   8 -13  -2    4.82    2.20
  -8 -13   2    7.60    1.71
   8 -13  -2    5.73    2.59
  -8  13   2    3.32    1.97
  -8  13   2    2.75    2.49
   8  13  -2    4.69    1.98
  -8  13   2    6.56    2.25
   7 -13  -2   56.45    5.81
  -7 -13   2   54.50    4.66
   7 -13  -2   58.02    6.26
   7  13  -2   52.06    5.24
  -7  13   2   55.83    6.02
  -7  13   2   58.09    5.36
  -7  13   2   55.34    5.32
   6 -13  -2  120.85    9.91
   6 -13  -2  125.56    9.76
  -6  13   2  115.64    9.71
  -6  13   2  121.16    8.99
  -6  13   2  116.26    9.14
   6  13  -2  110.78    9.00
   5 -13  -2   28.55    3.74
  -5 -13   2   22.23    2.93
   5 -13  -2   28.45    3.95
  -5  13   2   35.43    3.59
   5  13  -2   20.99    3.32
  -5  13   2   29.50    4.08
  -5  13   2   35.66    4.27
   5  13  -2   24.79    3.31
   4 -13  -2   27.13    3.40
  -4 -13   2   28.25    2.96
   4 -13  -2   20.12    3.48
  -4  13   2   25.09    3.71
  -4  13   2   20.49    3.06
   4  13  -2   24.64    3.41
   4  13  -2   21.70    3.00
   3 -13  -2  118.16    9.05
  -3 -13   2  114.75    8.81
  -3 -13   2  103.85    8.62
   3 -13  -2  127.78    9.43
  -3  13   2  142.99    9.85
   3  13  -2  115.43    9.25
   3  13  -2  113.97    8.86
  -3  13   2  133.54    9.78
   3  13  -2  116.91    8.17
   2 -13  -2  212.69   14.32
  -2 -13   2  189.28   13.86
   2 -13  -2  217.53   14.42
   2 -13  -2  217.91   14.16
  -2 -13   2  179.66   13.78
  -2  13   2  227.51   14.84
  -2  13   2  202.74   13.85
   2  13  -2  213.87   14.67
   2  13  -2  182.82   13.28
   2  13  -2  194.17   14.11
  -2  13   2  203.20   13.95
   1 -13  -2  250.74   17.43
  -1 -13   2  238.49   18.33
  -1 -13   2  249.99   17.38
   1 -13  -2  264.71   17.25
   1 -13  -2  254.77   17.25
   1  13  -2  273.52   18.24
  -1  13   2  275.33   18.07
  -1  13   2  260.92   17.30
   1  13  -2  260.12   17.03
  -1  13   2  262.57   17.12
   1  13  -2  251.56   17.57
   0 -13  -2   71.45    5.77
   0 -13  -2   64.02    5.56
   0 -13   2   73.64    5.95
   0 -13   2   69.46    5.52
   0 -13  -2   74.96    6.19
   0 -13  -2   67.03    5.32
   0  13  -2   62.26    5.97
   0  13   2   65.51    5.49
   0  13  -2   69.27    6.47
   0  13   2   68.85    5.21
   0  13   2   65.93    6.07
   0  13  -2   69.92    5.53
   1 -13   2    4.09    1.43
  -1 -13  -2    1.15    1.07
   1 -13   2    3.02    1.58
  -1 -13  -2    1.18    0.95
  -1 -13  -2    1.57    1.05
  -1 -13  -2    0.85    1.12
  -1  13  -2    2.52    1.39
  -1  13  -2    3.23    1.81
   1  13   2    1.22    0.85
   1  13   2    2.36    1.25
  -1  13  -2    4.36    2.02
   1  13   2    4.13    1.72
  -2 -13  -2  330.23   21.08
  -2 -13  -2  345.77   21.66
   2 -13   2  297.43   21.60
  -2 -13  -2  369.80   21.20
  -2 -13  -2  345.00   21.27
   2 -13   2  311.60   21.95
  -2  13  -2  290.50   21.75
   2  13   2  317.50   21.62
   2  13   2  326.84   21.16
  -2  13  -2  301.35   22.37
  -3 -13  -2   20.16    2.37
  -3 -13  -2   22.29    2.61
  -3 -13  -2   19.80    2.28
  -3 -13  -2   18.53    2.74
   3 -13   2   31.89    3.45
   3  13   2   18.87    2.63
   3  13   2   20.64    2.92
   4 -13   2   53.12    5.14
   4 -13   2   53.40    5.47
  -4 -13  -2   49.69    4.04
  -4 -13  -2   40.04    4.45
  -4 -13  -2   48.88    4.47
  -4  13  -2   60.36    5.95
  -4  13  -2   57.17    5.24
   4  13   2   50.77    4.62
   4  13   2   45.94    4.42
  -5 -13  -2    5.77    1.80
   5 -13   2    4.27    2.08
  -5 -13  -2    6.05    1.36
   5 -13   2    3.86    2.08
  -5  13  -2    7.39    2.61
   5  13   2    5.86    1.73
  -5  13  -2    6.56    2.18
  -5  13  -2    9.49    2.52
   6 -13   2   27.86    4.30
  -6 -13  -2   36.55    3.15
   6 -13   2   37.65    4.84
   6  13   2   38.31    3.92
  -6  13  -2   38.93    4.47
  -6  13  -2   34.72    4.35
  -6  13  -2   35.37    4.66
   7 -13   2   -0.43    2.12
  -7 -13  -2    1.18    0.96
   7  13   2    3.05    1.70
  -7  13  -2    2.51    1.91
  -7  13  -2    1.73    1.68
  -7  13  -2   -1.14    1.45
   8 -13   2  100.68    9.43
  -8 -13  -2  100.06    7.21
   8 -13   2  100.66    9.08
   8  13   2   91.89    8.08
  -8  13  -2  109.08    9.44
  -8  13  -2  105.22    8.88
  -9 -13  -2    9.64    1.88
   9 -13   2    5.80    2.78
   9 -13   2    7.73    3.05
  -9  13  -2   10.24    2.72
  -9  13  -2    8.40    2.89
  -9  13  -2    9.06    2.84
  10 -13   2   25.30    5.08
  10 -13   2   19.73    3.97
 -10 -13  -2   12.53    2.39
 -10  13  -2   20.82    3.85
 -10  13  -2   23.57    4.78
 -10  13  -2   18.72    4.04
  11 -13   2   45.37    6.33
  11 -13   2   56.77    6.57
 -11 -13  -2   45.30    4.49
 -11  13  -2   43.73    5.88
 -11  13  -2   35.70    5.48
 -11  13  -2   31.50    5.84
  12 -13   2   50.21    7.03
 -12 -13  -2   59.46    5.49
  12 -13   2   61.31    7.49
 -12  13  -2   56.05    7.00
 -12  13  -2   45.16    6.24
 -12  13  -2   48.28    6.64
 -12 -14   2   15.62    3.36
  12 -14  -2   22.82    5.12
  12 -14  -2   18.38    4.73
 -12  14   2   19.36    4.10
 -12  14   2   26.13    4.67
 -12  14   2   21.31    5.39
 -11 -14   2    1.18    1.51
  11 -14  -2    3.22    2.69
  11 -14  -2    3.80    3.18
  11  14  -2    6.08    2.50
 -11  14   2    1.70    2.73
 -11  14   2    4.41    2.49
 -11  14   2    3.37    2.36
 -10 -14   2  144.26   10.13
  10 -14  -2  121.77   11.73
  10 -14  -2  127.08   11.65
 -10  14   2  132.36   11.80
 -10  14   2  145.15   11.23
  10  14  -2  148.37   11.27
 -10  14   2  137.20   11.13
  -9 -14   2    0.94    1.36
   9 -14  -2    3.71    2.39
   9 -14  -2    3.34    2.37
  -9  14   2    3.78    3.13
   9  14  -2    2.02    2.00
  -9  14   2    5.65    2.06
  -9  14   2    1.35    2.06
   8 -14  -2   10.28    3.10
   8 -14  -2   11.94    2.96
  -8 -14   2   10.37    2.10
  -8  14   2   10.67    2.82
  -8  14   2    9.41    2.51
   8  14  -2    7.82    2.24
  -8  14   2    9.76    3.03
  -7 -14   2    4.69    1.52
  -7  14   2    4.03    1.93
  -7  14   2    6.87    2.13
   7  14  -2    3.78    1.81
  -6 -14   2    3.70    1.39
   6 -14  -2    4.63    2.18
   6 -14  -2   -0.23    1.55
  -6  14   2    2.38    1.63
  -6  14   2    1.69    2.07
   6  14  -2    1.29    1.50
  -6  14   2    1.87    1.58
   5 -14  -2   19.03    3.36
   5 -14  -2   19.92    3.65
  -5 -14   2   18.35    2.71
   5  14  -2   21.12    3.33
   5  14  -2   20.53    2.92
  -5  14   2   18.56    3.13
  -5  14   2   18.75    3.70
   4 -14  -2  875.43   57.94
  -4 -14   2  943.04   57.21
   4 -14  -2  861.16   57.66
  -4  14   2  876.52   57.37
   4  14  -2  933.25   57.65
   4  14  -2  903.06   57.32
  -4  14   2  923.94   58.27
  -3 -14   2   12.12    2.25
   3 -14  -2    6.60    2.18
   3 -14  -2    7.84    2.37
  -3  14   2   10.47    2.21
   3  14  -2   12.31    2.44
   3  14  -2   14.71    1.52
   3  14  -2   12.67    2.75
  -3  14   2   12.63    2.94
   2 -14  -2    3.54    1.34
  -2 -14   2    0.09    1.16
   2 -14  -2    2.54    1.47
  -2  14   2    2.89    1.76
   2  14  -2    3.02    2.01
  -2  14   2    1.26    1.36
   2  14  -2   -0.22    1.37
   2  14  -2    0.81    0.90
  -2  14   2    2.71    1.52
   1 -14  -2   93.06    7.96
   1 -14  -2   87.99    9.04
  -1 -14   2  101.38    8.05
   1  14  -2  118.53    8.96
  -1  14   2  103.27    7.63
   1  14  -2  103.43    7.59
  -1  14   2  118.73    8.76
   1  14  -2  104.68    8.29
  -1  14   2  109.23    7.98
   0 -14  -2  422.28   28.30
   0 -14  -2  438.10   28.04
   0 -14  -2  406.41   28.10
   0 -14   2  442.16   28.33
   0 -14   2  444.99   28.72
   0  14   2  423.86   28.87
   0  14  -2  465.31   28.86
   0  14  -2  447.29   28.24
   0  14   2  414.45   27.81
   0  14  -2  500.08   29.69
   0  14   2  402.38   28.09
  -1 -14  -2  191.56   12.52
  -1 -14  -2  199.70   12.99
  -1 -14  -2  180.80   13.07
   1 -14   2  171.66   13.05
   1 -14   2  191.64   13.59
   1  14   2  172.10   12.30
  -1  14  -2  196.58   14.26
  -1  14  -2  178.98   13.06
   1  14   2  190.53   12.88
   1  14   2  201.57   13.64
  -1  14  -2  198.54   13.63
   2 -14   2  448.25   31.38
  -2 -14  -2  456.73   30.56
  -2 -14  -2  475.16   30.52
  -2 -14  -2  465.67   30.47
   2 -14   2  459.03   31.10
   2  14   2  503.60   30.09
   2  14   2  475.87   31.09
  -2  14  -2  505.97   31.51
   2  14   2  480.12   30.59
  -2  14  -2  489.09   32.11
   3 -14   2   65.08    6.33
  -3 -14  -2   59.97    5.41
  -3 -14  -2   66.08    5.27
  -3 -14  -2   67.60    5.34
   3 -14   2   69.02    6.18
  -3  14  -2   72.44    6.91
   3  14   2   71.30    5.94
  -3  14  -2   74.76    6.49
   4 -14   2  673.44   40.43
   4 -14   2  599.56   39.83
  -4 -14  -2  610.85   39.11
  -4 -14  -2  596.66   38.64
  -4  14  -2  585.65   40.45
  -4  14  -2  610.13   39.88
   4  14   2  618.12   39.15
   4  14   2  590.17   38.95
  -5 -14  -2   27.12    2.92
   5 -14   2   30.29    4.38
   5 -14   2   33.85    4.34
  -5  14  -2   39.48    4.15
  -5  14  -2   29.66    4.89
   5  14   2   30.82    3.51
  -5  14  -2   31.89    4.23
  -6 -14  -2  377.32   24.31
   6 -14   2  379.51   26.08
  -6  14  -2  386.05   25.69
   6  14   2  378.80   25.07
  -6  14  -2  384.22   25.93
  -6  14  -2  369.76   26.49
   7 -14   2    3.80    2.38
  -7 -14  -2    5.55    1.37
   7 -14   2    3.90    2.26
  -7  14  -2    3.17    2.18
   7  14   2    7.85    2.23
  -7  14  -2    5.12    2.66
  -7  14  -2    4.64    2.14
  -8 -14  -2    3.98    1.25
   8 -14   2    4.94    2.50
   8 -14   2    0.31    1.74
  -8  14  -2    1.20    2.38
   8  14   2    4.71    1.89
  -8  14  -2    4.81    2.32
   9 -14   2    7.56    2.82
  -9 -14  -2    8.88    1.88
   9 -14   2   10.83    3.29
  -9  14  -2   10.90    3.36
  -9  14  -2    7.69    2.76
  -9  14  -2    7.92    3.18
  10 -14   2   47.15    6.56
  10 -14   2   49.50    6.46
 -10 -14  -2   46.91    4.47
 -10  14  -2   52.87    6.73
 -10  14  -2   42.38    5.73
 -10  14  -2   49.84    6.12
 -11 -14  -2    5.17    1.78
 -11  14  -2   -0.94    2.32
 -11  14  -2    3.20    2.60
 -11 -15   2    3.43    1.89
 -11  15   2    0.31    2.20
 -11  15   2   -0.75    2.91
  11  15  -2    3.13    2.53
 -11  15   2    1.44    2.21
 -10 -15   2    8.93    2.15
  10 -15  -2   12.36    3.72
  10 -15  -2    9.56    2.95
  10  15  -2    8.94    3.08
 -10  15   2   10.85    4.04
 -10  15   2    9.88    3.09
 -10  15   2    9.42    3.00
   9 -15  -2   11.67    3.60
   9 -15  -2   14.35    3.42
  -9 -15   2   14.04    2.55
  -9  15   2   13.83    2.90
  -9  15   2   10.05    3.72
  -9  15   2    9.33    2.86
   9  15  -2   19.17    3.63
  -8 -15   2  235.94   15.96
   8 -15  -2  257.56   17.88
   8 -15  -2  245.59   18.13
  -8  15   2  235.54   17.04
  -8  15   2  213.48   17.59
  -8  15   2  238.34   16.74
   8  15  -2  230.18   16.84
   7 -15  -2    1.97    2.16
  -7 -15   2    0.48    1.13
   7 -15  -2    2.73    2.09
   7  15  -2    1.92    1.73
  -7  15   2    0.47    2.00
  -7  15   2    1.89    1.55
  -7  15   2    0.71    1.70
   6 -15  -2    9.40    2.65
   6 -15  -2   11.64    3.03
  -6 -15   2   16.40    2.31
  -6  15   2   11.41    5.25
  -6  15   2   16.11    3.09
   6  15  -2   10.85    2.36
   5 -15  -2    1.98    1.78
   5 -15  -2    2.18    1.70
  -5 -15   2    2.30    1.21
  -5  15   2    2.25    1.78
  -5  15   2    1.66    1.44
   5  15  -2    0.70    1.33
   5  15  -2    2.26    1.76
   4 -15  -2  190.05   14.50
  -4 -15   2  212.11   13.82
   4 -15  -2  182.65   14.15
   4  15  -2  202.37   14.28
   4  15  -2  202.56   13.92
  -4  15   2  193.35   14.04
  -4  15   2  192.04   14.83
   3 -15  -2   -1.10    1.22
   3 -15  -2    1.92    1.46
  -3 -15   2    0.73    1.24
  -3  15   2    1.19    1.87
   3  15  -2   -0.07    0.66
  -3  15   2    0.81    1.41
   3  15  -2    0.68    1.65
   3  15  -2    0.03    1.36
  -2 -15   2    0.32    1.18
   2 -15  -2    1.77    1.38
   2 -15  -2    0.28    1.12
  -2  15   2    0.02    1.14
  -2  15   2    0.81    1.71
   2  15  -2    1.09    0.92
   2  15  -2    1.16    1.48
   2  15  -2    1.45    1.68
   1 -15  -2   58.70    5.43
  -1 -15   2   60.45    5.49
   1 -15  -2   61.61    5.19
  -1  15   2   60.30    5.34
  -1  15   2   62.47    6.04
  -1  15   2   62.40    5.02
   1  15  -2   56.03    5.45
   1  15  -2   61.34    4.93
   1  15  -2   60.47    6.14
   0 -15  -2  105.37    7.33
   0 -15   2   83.02    7.65
   0 -15  -2  104.34    7.73
   0  15  -2   90.79    8.44
   0  15   2   97.64    7.47
   0  15  -2   98.43    8.02
   0  15   2   97.89    7.06
   0  15   2  106.27    8.35
   0  15  -2   94.71    7.36
  -1 -15  -2   18.94    2.09
   1 -15   2   12.19    2.50
  -1 -15  -2   19.65    2.58
   1 -15   2   13.01    2.88
  -1 -15  -2   15.76    2.41
  -1  15  -2   13.54    3.36
   1  15   2   15.74    3.12
  -1  15  -2   10.71    2.75
   1  15   2   15.60    1.90
   1  15   2   15.82    2.49
   2 -15   2  384.88   26.32
  -2 -15  -2  377.83   25.33
  -2 -15  -2  392.48   25.37
  -2 -15  -2  393.25   25.36
   2 -15   2  379.61   25.89
  -2  15  -2  404.16   26.33
   2  15   2  394.42   25.96
   2  15   2  381.32   24.55
  -2  15  -2  401.58   27.02
   2  15   2  396.71   25.39
  -3 -15  -2   20.41    2.59
  -3 -15  -2   19.53    2.53
  -3 -15  -2   20.48    2.73
   3 -15   2   16.37    3.44
   3 -15   2   17.37    3.19
  -3  15  -2   25.32    4.46
  -3  15  -2   26.29    3.69
   3  15   2   25.59    3.30
   3  15   2   26.18    2.92
  -4 -15  -2  105.95    7.75
   4 -15   2  106.09    9.18
   4 -15   2  110.00    8.91
  -4 -15  -2  102.75    8.29
  -4  15  -2  113.82    9.89
   4  15   2  112.31    8.32
   4  15   2  107.26    8.05
  -4  15  -2   98.01    8.75
   5 -15   2    5.02    2.27
  -5 -15  -2    4.17    1.28
   5  15   2    4.75    1.78
  -5  15  -2    2.84    1.81
  -5  15  -2    3.10    2.15
  -6 -15  -2   21.45    2.48
   6 -15   2   21.06    3.96
   6 -15   2   21.63    4.24
  -6  15  -2   21.47    3.66
  -6  15  -2   20.53    3.77
  -6  15  -2   20.90    4.21
   6  15   2   27.22    3.18
   7 -15   2    1.97    2.38
   7 -15   2    2.39    2.18
  -7 -15  -2    2.46    1.16
  -7  15  -2    2.27    2.02
   7  15   2    3.26    1.79
  -7  15  -2    1.67    1.59
  -7  15  -2    3.77    2.37
  -8 -15  -2   10.69    1.86
   8 -15   2   10.38    3.35
   8 -15   2   10.18    3.10
  -8  15  -2   10.96    3.01
   8  15   2   12.82    2.67
  -8  15  -2    9.51    3.66
  -8  15  -2    9.53    3.12
  -9 -15  -2   13.53    2.24
   9 -15   2   11.82    3.96
   9 -15   2   13.70    3.63
  -9  15  -2   10.55    3.71
  -9  15  -2   15.40    3.65
  -9  15  -2   10.99    3.22
  10 -15   2   38.34    7.11
  10 -15   2   40.38    5.80
 -10 -15  -2   30.82    3.74
 -10  15  -2   41.93    6.15
 -10  15  -2   32.60    5.40
 -10  15  -2   29.89    5.15
  11 -15   2   13.70    4.14
  11 -15   2    9.34    3.60
 -11 -15  -2   14.25    2.69
 -11  15  -2   15.86    3.97
 -11  15  -2   11.96    4.03
 -11  15  -2   10.43    3.57
 -10 -16   2   72.15    6.43
  10 -16  -2   85.28    8.62
  10 -16  -2   83.56   10.99
 -10  16   2   74.30    8.36
 -10  16   2   83.38    7.56
 -10  16   2   77.20    7.81
  10  16  -2   69.99    7.39
  -9 -16   2    1.31    1.51
   9 -16  -2    0.38    1.99
   9 -16  -2   -0.94    1.99
   9  16  -2    0.10    1.77
  -9  16   2    1.72    2.27
  -9  16   2   -0.36    2.22
  -9  16   2    2.55    2.09
  -8 -16   2   13.40    2.31
   8 -16  -2    7.97    3.08
   8 -16  -2   13.56    3.57
  -8  16   2    7.13    2.76
   8  16  -2   11.46    2.95
  -8  16   2   11.27    2.79
  -8  16   2   11.24    3.44
   7 -16  -2   14.03    3.67
   7 -16  -2   15.68    3.74
  -7 -16   2   19.37    2.76
   7  16  -2   17.05    3.31
  -7  16   2   14.51    3.26
  -7  16   2   14.02    3.67
  -6 -16   2   68.51    5.69
   6 -16  -2   61.65    6.86
   6 -16  -2   65.33    6.62
  -6  16   2   66.42    7.12
  -6  16   2   72.77    6.52
   6  16  -2   64.99    6.18
  -5 -16   2   27.72    3.43
   5 -16  -2   29.29    4.33
   5 -16  -2   28.64    4.16
   5  16  -2   31.35    4.14
   5  16  -2   28.51    3.89
  -5  16   2   33.19    4.74
  -5  16   2   27.97    3.96
   4 -16  -2  251.66   18.55
   4 -16  -2  263.97   18.35
  -4 -16   2  259.12   17.72
  -4  16   2  276.22   19.20
  -4  16   2  259.57   18.03
   4  16  -2  249.81   18.18
   4  16  -2  262.03   17.93
   3 -16  -2    3.55    1.85
  -3 -16   2    2.73    1.52
   3 -16  -2    3.46    1.81
  -3  16   2    4.43    2.27
   3  16  -2    0.99    1.81
   3  16  -2    3.54    1.83
  -3  16   2    2.22    1.55
   3  16  -2    3.76    0.88
   2 -16  -2    4.98    1.77
  -2 -16   2    7.49    2.10
   2 -16  -2    5.01    2.05
   2  16  -2    6.62    1.31
  -2  16   2    6.50    2.40
   2  16  -2    4.55    2.29
   2  16  -2    5.73    2.02
  -2  16   2    8.02    1.99
   1 -16  -2  176.29   12.50
  -1 -16   2  173.44   12.52
   1 -16  -2  176.83   12.09
  -1  16   2  164.17   12.97
   1  16  -2  169.12   12.45
  -1  16   2  163.29   12.12
   1  16  -2  172.28   13.21
   0 -16   2   83.89    7.35
   0 -16  -2   87.67    7.15
   0 -16  -2   93.68    6.74
   0  16   2   81.46    6.68
   0  16  -2   96.19    8.32
   0  16   2   84.97    6.94
   0  16  -2   93.66    7.60
   0  16  -2   89.97    7.22
   0  16   2   84.72    7.64
  -1 -16  -2    4.57    1.58
   1 -16   2    5.48    1.76
   1 -16   2    1.50    1.55
  -1  16  -2    1.43    2.01
   1  16   2    4.69    1.90
  -1  16  -2   -0.67    1.45
   1  16   2    2.99    1.46
   1  16   2    4.03    1.06
  -2 -16  -2    1.82    1.92
   2 -16   2    1.64    1.78
   2 -16   2    3.13    1.77
   2  16   2    0.35    1.08
  -2  16  -2    4.01    2.01
   2  16   2    0.60    1.57
  -2  16  -2    0.37    1.63
  -3 -16  -2    3.97    1.40
   3 -16   2    5.40    2.04
  -3 -16  -2    4.39    1.45
   3 -16   2    6.34    2.02
   3  16   2    7.29    1.96
   3  16   2    5.87    1.61
  -3  16  -2    2.47    2.36
  -3  16  -2    4.53    2.26
   4 -16   2    1.78    1.78
  -4 -16  -2    3.88    1.50
  -4 -16  -2    3.20    1.33
  -4  16  -2    5.73    2.41
   4  16   2    4.82    1.87
   4  16   2    3.92    1.67
  -4  16  -2    2.45    2.29
   5 -16   2    8.87    2.99
   5 -16   2    7.73    2.62
  -5 -16  -2   13.18    2.05
  -5 -16  -2   10.32    1.96
  -5  16  -2    8.95    2.76
   5  16   2   14.10    2.46
  -5  16  -2    7.84    2.95
   6 -16   2  121.41   10.88
   6 -16   2  137.62   11.51
  -6 -16  -2  135.64    9.41
  -6  16  -2  136.03   11.08
  -6  16  -2  134.66   11.82
   6  16   2  138.54   10.14
   7 -16   2   66.75    7.07
   7 -16   2   58.15    6.63
  -7 -16  -2   55.87    5.17
  -7  16  -2   59.70    6.48
  -7  16  -2   64.49    6.34
  -7  16  -2   59.46    7.18
   7  16   2   65.08    5.86
   8 -16   2   52.86    6.77
  -8 -16  -2   60.71    4.78
   8 -16   2   61.87    7.06
   8  16   2   62.39    6.00
  -8  16  -2   53.46    6.31
  -8  16  -2   52.85    6.43
  -8  16  -2   53.41    7.00
  -9 -16  -2    1.46    1.40
   9 -16   2    0.83    2.54
   9 -16   2    0.85    2.60
  -9  16  -2   -1.52    2.04
  -9  16  -2    0.51    2.25
  -9  16  -2    0.68    2.40
 -10 -16  -2  150.69   11.76
  10 -16   2  160.87   13.87
  10 -16   2  174.08   13.73
 -10  16  -2  155.37   12.89
 -10  16  -2  163.70   13.24
 -10  16  -2  150.75   13.89
   9 -17  -2    3.99    2.81
   9 -17  -2   -2.42    2.08
  -9 -17   2    2.40    1.67
  -9  17   2    0.36    2.54
  -9  17   2    0.98    2.11
   9  17  -2    3.20    2.34
  -9  17   2    1.64    2.92
   8 -17  -2  124.21   10.84
  -8 -17   2  112.78    8.95
   8 -17  -2  136.83   11.37
   8  17  -2  115.56    9.85
  -8  17   2  126.66   11.19
  -8  17   2  115.44    9.94
   7 -17  -2   27.24    5.13
  -7 -17   2   50.36    4.49
   7 -17  -2   45.62    5.95
  -7  17   2   41.25    5.70
  -7  17   2   32.15    5.67
   7  17  -2   45.57    5.38
   6 -17  -2    2.20    2.39
  -6 -17   2    5.19    1.71
   6 -17  -2    3.41    2.18
   6  17  -2   -0.07    1.65
  -6  17   2    5.02    2.67
  -6  17   2    6.06    2.10
   5 -17  -2    6.33    2.66
  -5 -17   2    7.01    2.05
   5 -17  -2    7.34    2.24
  -5  17   2    6.59    2.21
   5  17  -2    3.50    2.99
   5  17  -2    6.71    2.26
  -5  17   2    9.69    3.02
   4 -17  -2  427.74   29.14
   4 -17  -2  424.73   28.66
  -4 -17   2  431.78   28.15
  -4  17   2  421.89   29.43
   4  17  -2  424.71   28.32
  -4  17   2  418.23   28.40
   4  17  -2  439.47   29.74
   3 -17  -2   94.90    8.45
   3 -17  -2   87.20    7.96
  -3 -17   2  112.40    8.18
  -3  17   2   90.78    7.96
  -3  17   2   91.02    9.30
   3  17  -2  106.01    8.23
   3  17  -2  114.26    9.13
   2 -17  -2   68.23    6.13
   2 -17  -2   72.13    6.56
  -2 -17   2   74.27    6.40
   2  17  -2   69.34    6.41
  -2  17   2   71.41    6.23
  -2  17   2   72.52    7.12
   2  17  -2   70.54    5.31
   2  17  -2   68.99    7.02
   1 -17  -2    1.10    1.30
  -1 -17   2    2.16    1.65
   1 -17  -2    0.38    1.08
   1  17  -2    1.59    2.22
   1  17  -2    3.46    1.54
  -1  17   2    1.29    1.29
  -1  17   2    1.00    1.77
   1  17  -2    0.91    1.66
   0 -17  -2    8.48    1.83
   0 -17  -2    8.76    2.23
   0 -17   2    7.10    2.29
   0  17   2    9.61    2.67
   0  17   2    8.62    1.94
   0  17  -2    9.20    2.57
   0  17   2    8.55    1.74
  -1 -17  -2   34.29    3.86
   1 -17   2   41.61    4.62
   1  17   2   35.00    3.79
   1  17   2   40.25    4.75
  -1  17  -2   42.50    4.80
   1  17   2   34.36    3.24
  -1  17  -2   40.33    5.31
  -2 -17  -2   60.34    5.26
   2 -17   2   61.00    5.72
   2 -17   2   51.70    5.93
  -2  17  -2   61.44    6.85
  -2  17  -2   61.50    6.17
   2  17   2   63.54    5.34
   2  17   2   57.80    5.84
   3 -17   2  327.60   21.95
   3 -17   2  307.26   22.31
  -3 -17  -2  309.20   21.03
   3  17   2  321.67   21.11
   3  17   2  305.10   21.49
  -3  17  -2  331.04   22.24
  -3  17  -2  323.70   23.01
   4 -17   2  114.90    9.92
  -4 -17  -2  109.74    8.43
   4  17   2  114.20    8.90
   4  17   2  113.90    8.66
  -4  17  -2  117.15   10.44
  -4  17  -2  117.76    9.78
   5 -17   2   32.44    5.02
   5 -17   2   34.36    4.91
  -5 -17  -2   30.76    3.37
  -5  17  -2   38.44    4.96
  -5  17  -2   35.34    5.75
   5  17   2   33.23    3.92
  -6 -17  -2    4.09    1.53
   6 -17   2    3.52    2.30
   6 -17   2    5.00    2.38
  -6  17  -2    2.84    2.33
   6  17   2    3.79    1.82
  -6  17  -2    2.86    2.76
   7 -17   2  143.81   11.86
  -7 -17  -2  121.28    9.21
   7 -17   2  143.89   11.46
  -7  17  -2  127.86   11.97
   7  17   2  122.09    9.96
  -7  17  -2  139.39   11.36
  -8 -17  -2   16.77    2.50
   8 -17   2   18.00    4.48
   8 -17   2    9.44    3.36
  -8  17  -2   13.11    3.65
  -8  17  -2   12.37    4.07
   9 -17   2    6.89    3.71
   9 -17   2   12.68    3.82
  -9  17  -2    8.14    3.36
  -9  17  -2   13.21    4.11
  -9  17  -2   11.00    3.31
   8 -18  -2   36.41    5.96
   8 -18  -2   31.21    5.19
  -8 -18   2   30.42    3.70
  -8  18   2   21.62    4.82
  -8  18   2   25.16    4.49
   8  18  -2   37.18    4.60
  -7 -18   2    8.52    2.30
   7 -18  -2   11.39    3.51
   7 -18  -2   11.25    3.34
  -7  18   2   11.62    3.83
   7  18  -2    8.97    2.76
  -7  18   2   12.15    3.13
   6 -18  -2   27.90    4.73
   6 -18  -2   24.11    4.65
  -6 -18   2   25.41    3.48
  -6  18   2   26.06    5.01
   6  18  -2   21.49    3.82
  -5 -18   2  238.32   16.14
   5 -18  -2  237.34   16.91
   5 -18  -2  217.11   17.11
   5  18  -2  226.87   16.49
   5  18  -2  230.89   16.47
  -5  18   2  224.30   16.56
  -5  18   2  236.33   17.81
  -4 -18   2   98.62    8.27
   4 -18  -2  104.66    9.20
   4  18  -2   95.53    8.29
  -4  18   2  103.92    8.66
   4  18  -2  104.48    8.95
  -4  18   2  121.25    9.99
   3 -18  -2    6.51    2.25
   3 -18  -2    9.73    3.31
  -3 -18   2   10.01    2.47
   3  18  -2    9.92    2.74
   3  18  -2    9.92    2.49
  -3  18   2    9.26    2.49
  -3  18   2    7.59    2.78
  -2 -18   2    6.37    2.27
   2 -18  -2    6.23    2.20
   2 -18  -2    4.98    1.92
  -2  18   2    5.49    2.04
   2  18  -2    3.40    2.29
   2  18  -2    3.37    1.97
  -2  18   2    5.39    2.75
   1 -18  -2   37.49    4.23
   1 -18  -2   28.34    3.46
  -1 -18   2   31.71    4.13
  -1  18   2   22.65    4.88
   1  18  -2   27.31    4.66
  -1  18   2   28.58    3.69
   1  18  -2   31.11    4.05
   0 -18  -2   15.72    2.36
   0 -18   2   13.81    3.03
   0 -18  -2   10.96    2.58
   0  18  -2   17.88    3.24
   0  18   2   14.20    2.57
   0  18  -2   13.82    3.70
   0  18   2   17.87    3.78
   1 -18   2    6.85    3.21
  -1 -18  -2    2.98    1.81
   1  18   2    6.82    1.95
   1  18   2    5.33    2.47
  -1  18  -2    6.15    2.55
  -1  18  -2    6.33    2.66
   2 -18   2   40.24    4.73
   2 -18   2   42.50    5.14
  -2 -18  -2   47.15    4.45
  -2  18  -2   36.79    5.60
   2  18   2   48.16    4.38
   2  18   2   41.62    4.89
  -2  18  -2   31.69    4.96
   3 -18   2   72.93    7.26
  -3 -18  -2   75.48    6.06
   3 -18   2   74.82    6.78
   3  18   2   69.46    6.43
   3  18   2   58.97    5.73
  -3  18  -2   73.47    7.95
  -4 -18  -2  162.07   11.56
   4 -18   2  163.97   13.12
   4 -18   2  159.86   12.58
   4  18   2  168.01   12.08
  -4  18  -2  153.84   13.54
  -4  18  -2  165.63   12.83
   5 -18   2   11.24    3.04
  -5 -18  -2    6.72    1.76
   5 -18   2    8.81    3.19
  -5  18  -2   10.92    3.16
  -5  18  -2    7.51    3.39
   6 -18   2  140.05   11.82
   6 -18   2  128.21   11.10
  -6 -18  -2  131.24    9.55
  -6  18  -2  136.51   11.45
  -6  18  -2  128.38   12.17
   7 -18   2   14.62    3.49
   7 -18   2   11.40    3.71
  -7 -18  -2   11.53    2.47
  -7  18  -2   13.98    3.66
  -7  18  -2   14.03    4.66
  -6 -19   2   44.87    4.58
   6 -19  -2   40.43    5.96
   6 -19  -2   37.91    5.45
  -6  19   2   36.45    6.35
  -6  19   2   28.53    4.77
   6  19  -2   50.44    5.30
   5 -19  -2    3.04    2.38
   5 -19  -2    5.99    2.43
  -5 -19   2    1.97    1.83
  -5  19   2    0.74    2.67
   5  19  -2    4.13    2.23
   5  19  -2    6.76    2.62
  -4 -19   2   17.52    2.98
   4 -19  -2   13.63    3.07
   4 -19  -2   16.51    3.68
  -4  19   2   15.19    3.06
  -4  19   2   21.36    4.59
   4  19  -2   11.64    3.32
   4  19  -2   18.10    3.16
   3 -19  -2   56.68    6.19
   3 -19  -2   53.11    5.78
  -3 -19   2   58.57    5.79
  -3  19   2   62.97    6.96
   3  19  -2   66.39    6.63
  -3  19   2   59.03    5.79
  -2 -19   2   59.77    6.12
   2 -19  -2   62.62    8.63
   2 -19  -2   69.14    6.00
  -2  19   2   69.92    6.13
  -2  19   2   68.15    7.26
   2  19  -2   57.74    6.97
   2  19  -2   65.13    6.32
   1 -19  -2   43.13    4.80
   1 -19  -2   44.54    4.28
   1  19  -2   36.01    4.78
   1  19  -2   50.15    5.86
  -1  19   2   33.84    4.31
  -1  19   2   39.36    5.34
   0 -19   2   31.49    4.41
   0 -19  -2   29.02    3.89
   0  19  -2   33.35    6.55
   0  19  -2   36.43    5.66
   0  19   2   32.84    4.82
  -1 -19  -2   96.86    7.91
   1 -19   2   96.48    8.56
  -1  19  -2   90.35    9.14
   1  19   2  104.85    8.63
  -1  19  -2   84.96    8.97
   2 -19   2    2.43    2.10
  -2 -19  -2    2.12    1.44
  -2  19  -2    0.44    1.90
   2  19   2    0.32    1.25
  -2  19  -2   -1.31    2.38
   2  19   2   -1.06    2.03
   3 -19   2    8.38    2.56
   3 -19   2    7.60    2.98
  -3 -19  -2    8.60    2.02
  -3  19  -2    8.50    2.77
  -3  19  -2   13.44    3.73
   3  19   2    7.36    3.91
   4 -19   2   51.96    6.01
   4 -19   2   54.30    6.49
  -4 -19  -2   58.40    5.24
  -4  19  -2   54.42    6.27
  -4  19  -2   53.89    7.07
   4  19   2   56.69    6.35
   5 -19   2   26.12    4.62
  -5 -19  -2   32.55    3.64
   5 -19   2   27.23    5.04
  -5  19  -2   31.67    5.67
  -5  19  -2   31.61    4.95
   6 -19   2    5.28    2.72
   6 -19   2   12.79    4.39
  -6  19  -2   13.88    6.50
  -6  19  -2   10.14    2.90
  -4 -20   2    2.74    1.95
   4 -20  -2    3.17    2.02
   4 -20  -2    0.49    2.11
   4  20  -2    0.50    2.00
  -4  20   2   -3.91    2.15
   4  20  -2    2.00    2.13
   3 -20  -2    6.61    2.20
  -3 -20   2    6.03    2.49
   3 -20  -2    2.97    2.43
   3  20  -2    5.66    2.67
  -3  20   2    3.33    2.73
   3  20  -2    7.30    2.58
   2 -20  -2   91.48    9.07
   2 -20  -2  108.26    8.76
  -2 -20   2  115.13    9.30
  -2  20   2  112.98   10.08
   2  20  -2  123.18   10.08
   2  20  -2  110.61    9.12
  -1 -20   2  169.84   12.90
   1 -20  -2  161.85   12.75
  -1  20   2  159.41   13.35
   1  20  -2  164.44   13.59
   1  20  -2  182.86   12.88
   0 -20  -2   14.35    3.51
   0 -20   2   13.68    3.30
   0  20  -2   10.07    2.87
   0  20   2   16.62    3.66
   0  20  -2   15.73    3.82
   1 -20   2    2.06    2.36
  -1 -20  -2   -0.13    1.66
  -1  20  -2    1.52    2.73
   1  20   2   -0.47    1.40
   1  20   2    3.11    2.42
  -1  20  -2    0.94    1.90
  -2 -20  -2    9.98    2.31
   2 -20   2    9.24    3.06
  -2  20  -2    8.19    3.10
  -2  20  -2    9.77    2.94
   2  20   2    6.96    2.67
  -3 -20  -2   45.02    4.69
   3 -20   2   44.68    5.75
   3  20   2   41.09    5.13
  -3  20  -2   42.34    5.40
  -3  20  -2   44.21    6.51
   4 -20   2   61.82    7.08
 -17   0   3  178.53   14.23
  17   0  -3  167.16   13.57
 -17   0   3  177.32   14.16
  17   0  -3  169.82   13.60
  16   0  -3   -1.37    1.83
 -16   0   3   -1.52    1.91
  16   0  -3   -0.20    2.11
 -16   0   3    1.03    2.14
 -15   0   3   47.22    6.02
  15   0  -3   54.88    5.96
  15   0  -3   59.10    6.26
  14   0  -3    1.03    1.73
 -14   0   3    1.63    2.09
  14   0  -3    0.99    1.92
  13   0  -3  322.16   21.89
  13   0  -3  312.53   22.04
 -13   0   3  310.63   24.10
 -12   0   3   -0.09    1.55
  12   0  -3    0.98    1.72
  12   0  -3    0.87    1.51
 -11   0   3  141.70   11.50
  11   0  -3  160.64   11.85
  11   0  -3  159.88   11.50
 -10   0   3    0.31    1.09
 -10   0   3    0.72    1.48
  10   0  -3   -1.34    1.08
  10   0  -3    1.00    1.46
  -9   0   3  349.73   22.34
   9   0  -3  347.52   22.26
  -9   0   3  319.78   22.66
   9   0  -3  348.47   22.67
  -8   0   3    1.05    0.90
   8   0  -3    2.16    1.18
   8   0  -3    1.08    0.92
  -8   0   3    1.64    0.96
  -7   0   3  481.48   30.52
   7   0  -3  478.24   30.53
  -7   0   3  428.30   30.46
  -7   0   3  489.28   30.31
   7   0  -3  499.56   30.31
   6   0  -3    1.62    0.80
  -6   0   3    1.52    0.81
   6   0  -3    0.09    0.78
  -6   0   3   -0.02    0.75
  -6   0   3    0.10    0.61
   5   0  -3  585.04   34.25
  -5   0   3  497.71   34.30
  -5   0   3  531.26   34.18
  -5   0   3  574.62   34.40
   5   0  -3  528.64   34.31
  -4   0   3    2.69    0.78
   4   0  -3    0.17    0.45
  -4   0   3    0.68    0.42
  -4   0   3    0.54    0.47
   4   0  -3    1.21    0.59
   4   0  -3    0.97    0.62
  -2   0   3    3.24    0.60
  -2   0   3    2.24    0.49
   2   0  -3    2.95    0.54
   2   0  -3    3.36    0.56
   2   0  -3    3.04    0.57
  -2   0   3    1.89    0.46
  -1   0   3    7.49    0.71
   1   0  -3    6.77    0.69
   1   0  -3    7.97    0.70
  -1   0   3    6.75    0.69
  -1   0   3    8.71    0.75
   0   0   3    3.42    0.50
   0   0  -3    3.97    0.48
   0   0  -3    3.43    0.52
   0   0  -3    5.35    0.51
   0   0   3    4.02    0.49
   0   0  -3    5.54    0.53
   0   0   3    4.50    0.50
  -1   0  -3 1681.60  110.64
   1   0   3 1744.04  110.64
   1   0   3 1731.16  110.02
  -1   0  -3 1665.02  110.04
  -2   0  -3    2.64    0.61
   2   0   3    2.68    0.62
   2   0   3    3.43    0.63
  -2   0  -3    2.85    0.58
   2   0   3    3.67    0.65
  -2   0  -3    3.14    0.60
  -2   0  -3    2.72    0.61
  -3   0  -3 2588.65  172.78
   3   0   3 2635.12  172.48
   3   0   3 2533.18  173.01
  -3   0  -3 2755.94  174.31
   4   0   3    3.10    0.86
  -4   0  -3    2.52    0.81
   4   0   3    3.13    0.87
  -4   0  -3    6.58    1.18
  -4   0  -3    2.81    0.87
  -4   0  -3    4.53    1.12
   4   0   3    4.47    0.93
  -5   0  -3 1903.98  121.49
  -5   0  -3 1922.80  121.51
   5   0   3 1994.03  121.49
   5   0   3 1995.00  121.46
  -5   0  -3 1885.34  121.67
   5   0   3 2033.03  121.36
  -6   0  -3    2.75    1.11
   6   0   3    4.42    1.03
   6   0   3    2.98    1.06
  -6   0  -3    3.16    1.13
   6   0   3    3.52    1.19
  -7   0  -3   26.45    2.90
   7   0   3   29.43    2.87
   7   0   3   25.04    2.77
  -7   0  -3   27.50    2.88
   7   0   3   26.43    2.61
   8   0   3   -0.28    0.79
  -8   0  -3    0.75    1.04
   8   0   3    0.36    0.95
   8   0   3   -0.29    0.79
  -8   0  -3    1.34    1.20
   9   0   3  150.99   11.15
  -9   0  -3  156.36   11.26
  -9   0  -3  160.29   11.26
  -9   0  -3  153.96   11.35
   9   0   3  161.96   13.04
  10   0   3    1.35    1.34
 -10   0  -3    0.51    1.17
  10   0   3   -0.33    1.27
  10   0   3    1.15    1.07
 -10   0  -3    2.22    1.60
  11   0   3  311.60   20.95
 -11   0  -3  306.60   21.00
  11   0   3  314.28   20.82
 -11   0  -3  297.04   21.04
  12   0   3   -1.05    1.28
 -12   0  -3    0.05    1.54
 -12   0  -3   -0.79    1.36
  12   0   3    0.06    1.21
  13   0   3  113.36    9.25
 -13   0  -3  113.13    9.46
 -13   0  -3  114.12    9.50
  13   0   3  108.33    8.87
  14   0   3    1.62    1.54
 -14   0  -3   -3.52    1.49
 -14   0  -3   -1.77    1.63
  15   0   3   29.37    4.10
 -15   0  -3   33.21    4.96
 -15   0  -3   32.98    4.79
  15   0   3   27.12    4.55
  16   0   3    3.29    2.53
 -16   0  -3   -0.88    2.14
 -17  -1   3   23.30    4.93
 -17  -1   3   21.96    4.91
  17  -1  -3   32.55    5.05
  17  -1  -3   33.07    4.77
  17   1  -3   24.29    4.21
  17   1  -3   22.81    4.15
 -17   1   3   24.52    4.67
 -17   1   3   34.77    5.07
  16  -1  -3   -0.03    2.14
  16  -1  -3    1.44    2.25
 -16  -1   3   -1.01    2.00
 -16   1   3    2.33    2.61
  16   1  -3    3.11    1.68
 -16   1   3    0.60    2.39
  16   1  -3   -0.75    1.75
  15  -1  -3   12.56    3.34
  15  -1  -3    9.39    2.70
 -15  -1   3    8.26    2.91
  15   1  -3   12.23    2.98
  15   1  -3   13.92    3.23
 -15   1   3    9.92    3.20
 -15   1   3    6.58    2.84
  14  -1  -3   36.38    5.96
  14  -1  -3   44.99    5.39
 -14  -1   3   55.91    5.92
  14   1  -3   48.62    5.34
  14   1  -3   59.93    5.79
 -14   1   3   46.66    5.87
 -13  -1   3   15.14    3.34
  13  -1  -3    8.69    2.68
  13  -1  -3    9.28    2.92
  13   1  -3   19.02    3.57
 -13   1   3   11.82    4.76
  13   1  -3   17.40    3.16
  12  -1  -3   10.12    2.63
  12  -1  -3    1.54    1.67
 -12  -1   3    1.41    1.77
 -12   1   3    2.82    1.83
  12   1  -3    6.08    2.27
  12   1  -3    4.49    1.87
  11  -1  -3    5.05    2.09
  11  -1  -3    4.38    1.96
 -11  -1   3    9.69    2.40
  11   1  -3   13.51    2.52
 -11   1   3    2.22    1.87
 -10  -1   3  223.17   15.21
  10  -1  -3  199.39   15.32
  10  -1  -3  212.30   15.16
 -10  -1   3  221.87   14.59
  10   1  -3  229.97   14.54
 -10   1   3  195.53   15.07
  10   1  -3  211.47   14.93
  10   1  -3  224.51   15.31
  -9  -1   3    9.81    2.08
   9  -1  -3    7.27    1.93
  -9  -1   3    6.30    1.44
   9  -1  -3    6.59    1.56
   9   1  -3    5.18    1.51
  -9   1   3    5.68    1.83
  -9   1   3    6.64    1.64
   9   1  -3    6.63    1.43
  -8  -1   3  259.35   16.46
  -8  -1   3  265.91   16.83
   8  -1  -3  270.19   16.73
   8  -1  -3  232.18   16.82
  -8  -1   3  231.12   16.74
  -8   1   3  261.02   16.86
  -8   1   3  215.69   16.81
  -8   1   3  267.44   16.79
   8   1  -3  249.27   16.70
   8   1  -3  247.52   16.37
  -7  -1   3  133.49    8.78
  -7  -1   3  128.12    8.44
   7  -1  -3  119.26    8.80
  -7  -1   3  121.37    8.76
   7  -1  -3  110.84    8.50
  -7   1   3  117.28    8.67
   7   1  -3  132.98    8.46
   7   1  -3  147.54    8.84
  -7   1   3  100.96    8.66
  -7   1   3  112.95    8.55
  -6  -1   3  402.56   23.98
   6  -1  -3  380.94   24.04
  -6  -1   3  372.88   23.63
   6  -1  -3  374.34   23.83
  -6  -1   3  363.27   23.85
   6   1  -3  362.82   24.05
   6   1  -3  397.83   23.68
   6   1  -3  381.57   23.84
  -6   1   3  314.29   23.85
  -6   1   3  369.31   23.83
  -6   1   3  363.50   23.90
  -5  -1   3    1.57    0.72
   5  -1  -3    3.36    1.01
  -5  -1   3    3.87    0.76
  -5  -1   3    3.15    0.95
  -5   1   3    2.76    0.94
   5   1  -3    3.22    0.85
  -5   1   3    1.50    0.72
   5   1  -3    3.03    0.98
   5   1  -3    4.32    0.89
  -5   1   3    3.52    0.87
  -4  -1   3   53.37    3.49
  -4  -1   3   54.54    3.63
   4  -1  -3   46.23    3.59
   4  -1  -3   39.10    3.58
  -4   1   3   42.35    3.54
   4   1  -3   51.29    3.74
   4   1  -3   53.83    3.57
  -4   1   3   42.45    3.51
   3  -1  -3   93.56    5.81
  -3  -1   3   75.84    5.55
  -3  -1   3   77.78    5.86
   3  -1  -3   85.90    5.77
   3   1  -3   71.34    5.68
  -3   1   3   99.15    5.79
  -3   1   3   99.95    5.87
   3   1  -3   81.91    5.61
   3   1  -3   75.54    5.57
  -2  -1   3  464.26   26.55
  -2  -1   3  467.70   26.52
   2  -1  -3  406.53   26.45
  -2  -1   3  413.53   26.41
   2  -1  -3  382.15   26.46
   2   1  -3  399.65   26.38
   2   1  -3  410.04   26.48
  -2   1   3  414.74   26.46
  -2   1   3  432.11   26.41
  -2   1   3  407.10   26.47
   2   1  -3  457.02   26.44
  -1  -1   3 5634.38  348.65
  -1  -1   3 5500.12  347.92
   1   1  -3 5585.66  348.25
   0  -1   3 1623.96  105.91
   0  -1  -3 1578.38  103.98
   0  -1  -3 1576.93  103.64
   0  -1   3 1659.25  106.65
   0   1  -3 1741.88  106.35
   0   1  -3 1779.54  107.15
   0   1   3 1591.56  103.83
   0   1   3 1582.38  103.51
  -1  -1  -3 4568.27  282.35
   1  -1   3 4270.31  284.12
  -1  -1  -3 4526.87  281.90
   1  -1   3 4319.41  284.96
   1   1   3 4869.83  281.92
   1   1   3 4746.97  282.29
  -1   1  -3 4382.87  285.27
  -1   1  -3 4406.05  284.60
   2  -1   3   27.79    2.30
   2  -1   3   27.67    2.31
   2  -1   3   29.54    2.22
   2  -1   3   29.39    2.24
  -2   1  -3   28.20    2.23
  -2   1  -3   27.69    2.29
  -2   1  -3   28.80    2.33
  -2   1  -3   26.44    2.25
   3  -1   3 3858.42  267.03
   3  -1   3 3916.46  268.26
  -3   1  -3 4281.87  270.13
  -3   1  -3 4263.12  269.02
   3   1   3 4294.93  266.49
   3   1   3 4309.81  265.68
   4  -1   3  503.85   29.09
   4  -1   3  510.12   29.00
   4  -1   3  498.74   29.07
  -4  -1  -3  408.23   28.85
  -4  -1  -3  400.43   28.75
  -4   1  -3  502.55   29.24
   4   1   3  387.58   28.71
  -4   1  -3  500.30   29.04
  -4   1  -3  494.57   28.98
   4   1   3  404.00   28.56
   4   1   3  386.08   28.62
  -4   1  -3  494.66   29.09
  -5  -1  -3  665.97   42.70
  -5  -1  -3  645.99   42.85
   5  -1   3  718.93   42.96
   5  -1   3  740.04   42.99
  -5  -1  -3  652.65   42.69
   5  -1   3  702.59   42.80
  -5   1  -3  647.41   42.82
  -5   1  -3  655.49   42.78
  -5   1  -3  667.27   43.08
   5   1   3  694.85   42.46
   5   1   3  690.28   42.60
   5   1   3  682.18   42.68
  -5   1  -3  664.12   42.90
   6  -1   3  424.76   26.09
   6  -1   3  421.93   26.08
  -6  -1  -3  388.71   25.84
   6  -1   3  415.94   25.88
  -6  -1  -3  398.66   25.81
   6   1   3  397.31   25.77
  -6   1  -3  406.29   26.04
   6   1   3  390.06   25.49
  -6   1  -3  386.99   25.89
   6   1   3  409.40   25.71
  -6   1  -3  388.31   25.95
   7  -1   3   44.48    3.75
  -7  -1  -3   44.40    3.84
  -7  -1  -3   42.41    3.70
   7  -1   3   37.49    3.77
  -7  -1  -3   41.76    3.82
   7  -1   3   35.88    3.71
   7   1   3   42.11    3.35
   7   1   3   43.42    3.61
  -7   1  -3   37.75    3.79
  -7   1  -3   42.82    3.86
   7   1   3   42.11    3.68
  -7   1  -3   40.62    3.76
  -8  -1  -3    1.65    0.96
   8  -1   3    0.40    1.10
  -8  -1  -3    0.64    0.93
   8  -1   3    1.64    1.10
  -8  -1  -3    1.37    1.20
  -8   1  -3    1.22    0.95
  -8   1  -3    0.80    1.02
  -8   1  -3    0.85    1.16
   8   1   3    2.15    1.06
   8   1   3    0.59    0.84
   8   1   3    1.68    0.81
   9  -1   3  111.82    8.70
  -9  -1  -3  125.22    8.84
   9  -1   3  107.56    8.32
   9  -1   3  108.32    8.67
  -9  -1  -3  127.85    8.67
   9   1   3  116.91    8.42
   9   1   3  118.20    8.08
   9   1   3  119.03    9.08
  -9   1  -3  103.94    8.59
  -9   1  -3  106.77    8.72
  10  -1   3  338.76   22.20
 -10  -1  -3  342.88   22.62
 -10  -1  -3  368.05   22.45
  10  -1   3  325.40   22.17
  10   1   3  327.76   21.96
  10   1   3  320.43   21.84
  10   1   3  310.42   22.05
 -10   1  -3  324.79   22.21
 -10   1  -3  311.59   22.23
  11  -1   3  872.32   52.52
 -11  -1  -3  846.72   52.40
 -11  -1  -3  830.97   52.47
  11  -1   3  853.37   52.38
  11   1   3  779.95   52.04
 -11   1  -3  818.91   52.43
  11   1   3  769.84   51.38
  11   1   3  771.40   51.79
 -11   1  -3  804.30   52.51
 -12  -1  -3    3.00    1.81
 -12  -1  -3    5.21    2.08
  12  -1   3    3.77    1.86
  12  -1   3    1.15    1.63
 -12   1  -3    4.35    1.86
  12   1   3    2.23    1.52
 -12   1  -3    3.04    1.94
  12   1   3    2.80    1.41
  12   1   3    0.06    1.44
 -13  -1  -3   45.09    5.07
  13  -1   3   42.27    4.93
  13  -1   3   43.85    4.79
  13   1   3   40.76    4.32
 -13   1  -3   38.48    4.90
 -13   1  -3   38.64    4.94
  13   1   3   39.83    4.53
  14  -1   3   12.10    2.90
 -14  -1  -3   10.83    2.99
 -14  -1  -3   13.35    3.34
  14  -1   3   13.64    3.18
 -14   1  -3   11.38    3.15
  14   1   3   11.23    2.48
 -14   1  -3    9.60    2.96
  14   1   3    8.30    2.66
  15  -1   3   83.80    7.85
  15  -1   3   73.32    7.21
 -15  -1  -3   81.33    7.97
 -15  -1  -3   82.29    7.87
 -15   1  -3   80.18    7.99
 -15   1  -3   80.44    7.95
  15   1   3   85.82    7.57
 -16  -1  -3   20.65    6.70
  16  -1   3   17.48    3.90
  16  -1   3   19.26    3.49
 -16  -1  -3   18.60    3.99
  16   1   3   17.07    3.64
 -16   1  -3   18.80    4.20
 -16   1  -3   18.28    4.34
  17  -2  -3    1.90    2.49
  17  -2  -3    1.34    2.36
 -17  -2   3    1.83    2.47
  17   2  -3    1.33    1.89
 -17   2   3    6.89    3.25
 -17   2   3    2.13    2.46
  17   2  -3    1.38    1.88
  16  -2  -3    5.22    2.64
 -16  -2   3    6.09    2.76
  16  -2  -3    5.03    2.60
 -16   2   3    3.66    2.73
 -16   2   3    5.13    2.95
  16   2  -3    4.22    2.15
  15  -2  -3   -0.64    1.72
 -15  -2   3    0.12    2.17
  15  -2  -3    0.27    2.00
  15   2  -3   -0.61    1.50
 -15   2   3    1.64    2.15
 -15   2   3    2.12    2.13
  15   2  -3    0.38    1.67
 -14  -2   3    0.05    1.55
  14  -2  -3    0.97    2.00
  14  -2  -3   -0.58    1.98
 -14   2   3   -1.03    1.86
 -14   2   3   -0.32    1.90
  14   2  -3   -0.03    1.44
  14   2  -3    1.37    1.77
  13  -2  -3  306.53   21.71
 -13  -2   3  286.03   21.21
  13  -2  -3  315.16   21.52
  13   2  -3  304.51   21.05
 -13   2   3  298.48   21.53
  13   2  -3  320.55   20.97
  12  -2  -3    2.62    1.96
 -12  -2   3    6.37    2.10
  12  -2  -3    1.00    1.57
  12   2  -3    8.56    2.16
 -12   2   3   -0.24    1.58
  12   2  -3    5.32    2.10
 -11  -2   3    5.39    2.13
 -11  -2   3    4.67    1.47
  11  -2  -3    5.07    2.30
  11  -2  -3    6.28    2.26
  11   2  -3    4.34    1.48
 -11   2   3    6.12    2.34
  11   2  -3    4.67    1.72
  11   2  -3    5.36    2.01
 -10  -2   3   64.12    5.23
  10  -2  -3   66.28    6.02
  10  -2  -3   58.86    6.17
 -10  -2   3   70.81    5.96
  10   2  -3   64.67    5.59
 -10   2   3   67.63    6.10
  10   2  -3   69.19    5.21
  10   2  -3   64.11    5.83
   9  -2  -3  210.49   15.27
  -9  -2   3  223.03   15.15
  -9  -2   3  223.36   14.61
   9   2  -3  219.47   14.56
   9   2  -3  223.63   14.94
  -9   2   3  222.00   15.06
  -9   2   3  215.60   15.33
  -8  -2   3   14.17    2.03
  -8  -2   3   15.22    1.81
   8  -2  -3   13.80    2.51
   8  -2  -3   12.82    1.98
  -8  -2   3   15.65    2.20
   8   2  -3   14.77    2.09
  -8   2   3   11.58    2.19
   8   2  -3   15.40    1.87
  -8   2   3    9.96    2.09
  -8   2   3   15.65    2.44
  -7  -2   3  890.55   53.78
   7  -2  -3  825.65   53.90
  -7  -2   3  854.17   53.64
  -7  -2   3  886.54   53.31
   7  -2  -3  806.95   53.63
  -7   2   3  829.45   53.68
   7   2  -3  897.91   53.58
   7   2  -3  948.21   54.12
  -7   2   3  798.38   53.69
  -7   2   3  728.03   53.69
   7   2  -3  905.34   53.34
  -6  -2   3   19.95    2.09
  -6  -2   3   14.74    1.97
   6  -2  -3   21.48    2.33
  -6  -2   3   18.02    1.75
  -6   2   3   24.12    2.27
  -6   2   3   20.96    2.30
   6   2  -3   18.32    1.83
   6   2  -3   17.14    2.17
   6   2  -3   15.62    1.87
  -5  -2   3  707.58   43.34
   5  -2  -3  677.79   43.82
  -5  -2   3  664.60   43.49
  -5  -2   3  756.12   43.75
   5  -2  -3  715.04   43.72
   5   2  -3  735.38   43.42
  -5   2   3  621.49   43.68
  -5   2   3  707.96   43.71
  -5   2   3  696.31   43.69
   5   2  -3  661.15   43.42
  -4  -2   3   84.15    6.14
  -4  -2   3   96.75    6.37
   4  -2  -3  106.97    6.56
  -4  -2   3   95.65    6.07
   4   2  -3   87.23    6.07
   4   2  -3   91.06    6.12
   4   2  -3   78.31    6.29
   3  -2  -3    3.07    0.78
   3  -2  -3    4.14    0.81
  -3  -2   3    2.75    0.63
  -3  -2   3    3.83    0.75
   3   2  -3    2.16    0.63
   3   2  -3    2.30    0.51
  -3   2   3    3.46    0.77
  -3   2   3    1.11    0.55
  -3   2   3    1.46    0.55
   3   2  -3    4.77    0.75
  -2  -2   3  146.27    8.50
   2  -2  -3  109.61    8.49
  -2  -2   3  148.03    8.65
  -2   2   3  113.19    8.36
   2   2  -3  142.78    8.60
  -2   2   3  127.51    8.51
  -1  -2   3  564.39   34.55
   1  -2  -3  522.38   34.32
  -1  -2   3  580.81   34.60
  -1  -2   3  535.19   34.46
   1  -2  -3  536.26   34.41
  -1   2   3  563.20   34.40
   1   2  -3  548.24   34.54
  -1   2   3  505.83   34.20
   1   2  -3  593.56   34.50
  -1   2   3  577.34   34.30
   0   2  -3 1368.55   85.03
   0   2  -3 1374.22   85.01
  -1  -2  -3 1976.66  129.21
   1  -2   3 1972.52  134.90
  -1  -2  -3 2057.18  129.06
   1  -2   3 1979.59  134.08
  -1   2  -3 2078.28  135.70
  -1   2  -3 2093.85  134.96
   1   2   3 2136.28  130.26
   1   2   3 2152.44  129.88
   2  -2   3  455.29   29.94
   2  -2   3  465.66   29.95
   2  -2   3  461.47   30.06
  -2   2  -3  511.11   30.05
  -2   2  -3  516.41   30.01
  -2   2  -3  445.85   29.89
  -2   2  -3  471.74   29.91
  -3  -2  -3 1473.30   95.28
   3  -2   3 1415.29   95.64
   3  -2   3 1580.51   95.63
   3  -2   3 1466.62   95.68
  -3  -2  -3 1555.84   95.71
  -3  -2  -3 1525.61   95.33
   3  -2   3 1614.70   95.62
  -3  -2  -3 1529.88   95.32
  -3   2  -3 1634.83   95.85
  -3   2  -3 1638.72   95.75
  -3   2  -3 1520.03   95.65
  -3   2  -3 1520.00   95.62
  -4  -2  -3  209.81   15.49
  -4  -2  -3  231.30   15.41
   4  -2   3  259.99   15.89
  -4  -2  -3  207.26   15.34
   4  -2   3  275.94   15.83
   4  -2   3  252.63   15.89
   4   2   3  219.82   15.36
   4   2   3  235.42   15.10
  -4   2  -3  246.45   15.72
   4   2   3  229.06   15.19
  -4   2  -3  257.41   16.01
  -4   2  -3  268.45   15.92
  -4   2  -3  247.13   15.78
   5  -2   3  316.80   19.38
  -5  -2  -3  283.35   19.03
   5  -2   3  322.15   19.53
  -5  -2  -3  285.46   19.21
   5  -2   3  319.13   19.57
  -5  -2  -3  292.82   19.06
  -5  -2  -3  267.30   19.13
  -5   2  -3  316.78   19.71
   5   2   3  312.02   18.72
  -5   2  -3  311.34   19.51
   5   2   3  293.18   19.00
  -5   2  -3  277.18   19.31
  -5   2  -3  283.42   19.29
   5   2   3  279.95   18.80
   6  -2   3   46.99    4.02
   6  -2   3   50.38    4.23
   6  -2   3   51.09    4.35
  -6   2  -3   41.86    4.07
  -6   2  -3   50.27    4.28
  -6   2  -3   46.23    4.09
  -7  -2  -3  109.25    7.43
   7  -2   3   91.20    7.49
  -7  -2  -3   92.41    7.38
   7  -2   3   85.76    7.48
   7  -2   3  102.08    7.46
  -7  -2  -3  101.26    7.21
  -7   2  -3   97.62    7.65
   7   2   3  100.75    6.80
   7   2   3  108.22    7.09
   7   2   3  110.57    7.28
  -7   2  -3   97.49    7.51
   8  -2   3   32.86    3.60
   8  -2   3   34.64    3.37
  -8  -2  -3   28.55    3.18
   8  -2   3   29.14    3.41
  -8  -2  -3   31.08    3.26
  -8  -2  -3   35.05    3.25
   8   2   3   33.56    3.03
   8   2   3   31.81    2.70
  -8   2  -3   37.50    3.65
   8   2   3   28.01    3.05
  -8   2  -3   30.75    3.34
  -8   2  -3   31.53    3.55
  -9  -2  -3  215.72   15.33
   9  -2   3  244.07   15.76
  -9  -2  -3  205.26   15.04
   9  -2   3  245.94   15.76
   9  -2   3  240.58   15.42
  -9   2  -3  224.00   15.60
   9   2   3  204.68   15.00
   9   2   3  216.73   14.53
  -9   2  -3  239.83   15.64
   9   2   3  203.93   14.79
 -10  -2  -3    4.55    1.74
 -10  -2  -3    5.44    1.70
  10  -2   3    9.34    2.26
  10  -2   3   11.49    2.58
 -10   2  -3    8.88    2.31
  10   2   3    5.53    1.57
 -10   2  -3    7.45    2.15
  10   2   3    7.20    1.43
  10   2   3    6.05    1.74
  11  -2   3  123.99    9.66
  11  -2   3  121.11    9.65
 -11  -2  -3  126.20    9.60
  11   2   3  127.89    9.31
 -11   2  -3  113.33    9.66
  11   2   3  125.17    8.51
 -11   2  -3  112.97    9.56
  12  -2   3   70.64    6.76
 -12  -2  -3   72.83    6.54
 -12  -2  -3   73.74    6.74
  12  -2   3   70.43    6.80
  12   2   3   78.32    6.44
 -12   2  -3   62.16    6.50
 -12   2  -3   76.00    7.51
  12   2   3   79.37    6.05
 -13  -2  -3   49.39    7.01
  13  -2   3   38.86    4.89
 -13  -2  -3   42.95    5.45
  13  -2   3   34.21    5.34
  13   2   3   48.64    4.74
  13   2   3   41.47    3.82
  13   2   3   50.13    4.30
 -13   2  -3   33.31    4.75
 -13   2  -3   42.75    5.23
 -14  -2  -3   20.95    4.05
  14  -2   3   28.16    4.51
 -14  -2  -3   25.44    3.79
  14  -2   3   27.30    4.15
  14   2   3   18.88    2.83
 -14   2  -3   33.35    4.97
  14   2   3   24.71    3.88
 -14   2  -3   25.89    4.50
  15  -2   3    3.56    1.93
 -15  -2  -3    0.73    2.06
  15  -2   3    0.97    2.16
 -15  -2  -3    3.63    2.32
 -15   2  -3    5.72    2.88
 -15   2  -3    3.54    2.46
  16  -2   3    5.46    2.79
  16  -2   3    5.33    2.43
 -16  -2  -3    2.93    2.60
 -16  -2  -3    4.51    2.46
  16   2   3    4.35    2.27
 -16   2  -3    8.03    3.28
  16  -3  -3  117.74   10.56
  16  -3  -3  122.24   10.41
 -16  -3   3  118.19   10.32
  16   3  -3   92.38    8.90
 -16   3   3  141.72   10.93
 -16   3   3  130.56   10.78
  16   3  -3   99.29    9.23
 -15  -3   3    5.23    2.61
  15  -3  -3    5.32    2.58
  15  -3  -3    5.33    2.78
 -15   3   3    6.12    2.91
  15   3  -3    5.78    2.21
  15   3  -3    7.09    2.04
 -15   3   3   11.31    3.30
 -14  -3   3   17.77    3.76
  14  -3  -3   21.77    4.28
  14  -3  -3   20.08    3.86
 -14   3   3   23.27    4.14
  14   3  -3   14.78    2.96
  14   3  -3   15.49    3.07
 -14   3   3   21.12    3.97
  13  -3  -3    1.13    1.71
  13  -3  -3   -0.77    1.80
 -13  -3   3    0.64    1.66
  13   3  -3    2.15    1.55
 -13   3   3   -0.50    1.46
  13   3  -3    2.78    1.67
 -13   3   3   -1.14    1.72
  12  -3  -3   78.76    7.25
 -12  -3   3   84.88    7.19
  12  -3  -3   77.66    7.47
 -12   3   3   87.59    7.52
 -12   3   3   78.47    7.17
  12   3  -3   75.40    6.74
  12   3  -3   71.02    6.46
  11  -3  -3    0.64    1.36
 -11  -3   3    0.77    0.94
  11  -3  -3    0.03    1.53
 -11  -3   3    1.58    1.54
 -11   3   3    0.81    1.61
  11   3  -3    1.72    1.36
  11   3  -3    0.94    1.39
  11   3  -3    2.85    1.24
  10  -3  -3   -0.05    1.26
 -10  -3   3    0.58    0.83
  10  -3  -3   -0.14    1.25
 -10  -3   3    0.09    1.34
 -10   3   3    0.07    1.29
  10   3  -3    0.60    1.49
  10   3  -3    0.36    1.11
  -9  -3   3   22.64    2.91
   9  -3  -3   33.94    3.88
   9  -3  -3   28.24    3.26
  -9  -3   3   21.84    2.39
   9   3  -3   19.54    2.32
   9   3  -3   22.98    2.94
  -9   3   3   29.47    3.31
   9   3  -3   23.71    2.69
   8  -3  -3    3.60    1.40
  -8  -3   3    1.65    0.80
   8  -3  -3    2.99    1.20
  -8  -3   3    3.95    1.32
  -8  -3   3    3.92    1.23
   8   3  -3    4.05    1.38
  -8   3   3    4.47    1.50
  -8   3   3    3.92    1.37
   8   3  -3    3.08    1.15
  -8   3   3    2.93    1.33
   8   3  -3    4.11    1.04
   7  -3  -3  151.81    9.83
  -7  -3   3  111.63    9.02
  -7  -3   3  125.14    8.76
   7   3  -3  122.53    9.46
   7   3  -3  126.87    8.82
  -7   3   3  138.73    9.41
  -7   3   3  138.63    9.91
  -7   3   3  144.63    9.63
   6  -3  -3  279.45   19.40
  -6  -3   3  305.08   18.75
  -6  -3   3  282.61   18.96
  -6  -3   3  307.65   19.25
   6  -3  -3  278.94   19.25
   6   3  -3  307.19   19.41
   6   3  -3  296.34   18.81
  -6   3   3  288.63   19.34
   6   3  -3  299.71   18.89
  -6   3   3  298.89   19.30
  -6   3   3  293.30   19.25
   5  -3  -3   52.42    3.91
   5  -3  -3   52.07    4.10
  -5  -3   3   44.50    3.34
  -5  -3   3   45.13    3.76
  -5  -3   3   46.09    3.70
  -5  -3   3   41.31    3.51
  -5   3   3   47.39    3.80
   5   3  -3   47.32    3.48
  -5   3   3   46.14    3.85
   5   3  -3   45.42    3.83
   5   3  -3   47.44    3.46
  -4  -3   3   12.48    1.42
  -4  -3   3    8.93    1.14
  -4  -3   3   10.15    1.32
   4   3  -3    9.19    1.02
   4   3  -3    6.73    1.26
  -3  -3   3  431.34   26.94
   3  -3  -3  459.67   26.96
   3  -3  -3  421.90   27.00
  -3  -3   3  391.67   26.67
  -3  -3   3  443.79   26.96
   3   3  -3  368.25   26.78
  -3   3   3  450.98   26.91
   3   3  -3  429.29   26.73
   3   3  -3  396.84   26.85
  -3   3   3  462.09   26.97
   3   3  -3  427.46   26.56
  -2  -3   3   47.29    3.46
  -2  -3   3   43.25    3.00
   2  -3  -3   36.33    3.01
   2  -3  -3   36.78    2.92
  -2   3   3   36.22    2.89
  -2   3   3   39.62    3.00
   2   3  -3   47.95    3.03
  -2   3   3   36.46    2.87
   2   3  -3   41.12    3.09
  -1  -3   3 1585.82   91.83
   1  -3  -3 1428.21   91.41
  -1  -3   3 1404.98   91.61
   1  -3  -3 1458.12   91.56
  -1  -3   3 1495.59   91.71
  -1   3   3 1559.63   91.48
   1   3  -3 1435.22   91.77
   1   3  -3 1460.46   91.71
   0  -3   3  662.59   45.54
   0  -3   3  742.81   45.68
   0  -3   3  689.14   45.56
   0  -3  -3  745.96   45.22
   0   3   3  823.57   45.28
   0   3  -3  661.91   45.65
   0   3  -3  676.84   45.58
   0   3   3  769.46   45.33
   0   3  -3  765.70   45.54
   0   3  -3  763.54   45.60
  -1  -3  -3   88.62    4.95
  -1  -3  -3   87.37    4.96
   1  -3   3   66.90    5.25
  -1   3  -3   70.30    5.31
  -1   3  -3   67.22    5.26
  -1   3  -3   73.11    5.39
  -2  -3  -3  262.91   17.07
  -2  -3  -3  241.06   17.14
   2  -3   3  285.09   17.52
   2  -3   3  260.48   17.57
   2  -3   3  263.81   17.54
   2  -3   3  293.97   17.54
  -2   3  -3  293.56   17.60
  -2   3  -3  253.72   17.51
  -2   3  -3  273.77   17.58
  -2   3  -3  302.14   17.70
   3  -3   3  924.19   60.27
   3  -3   3 1059.63   60.29
  -3  -3  -3  894.65   59.69
  -3  -3  -3  906.54   59.74
   3  -3   3 1036.77   60.25
  -3  -3  -3  866.96   59.63
   3  -3   3  934.24   60.34
  -3  -3  -3  897.75   59.95
  -3   3  -3 1082.83   60.44
  -3   3  -3  989.50   60.30
  -3   3  -3 1086.33   60.54
  -3   3  -3  897.59   60.22
   4  -3   3  496.85   30.71
  -4  -3  -3  471.17   30.02
  -4  -3  -3  440.32   30.21
   4  -3   3  499.87   30.51
   4  -3   3  473.37   30.61
   4  -3   3  512.70   30.56
  -4  -3  -3  479.87   30.00
  -4  -3  -3  467.25   30.11
  -4   3  -3  432.90   30.45
  -4   3  -3  459.37   30.49
  -4   3  -3  509.78   30.69
  -4   3  -3  509.91   30.85
  -5  -3  -3  332.37   19.17
   5  -3   3  270.94   19.38
   5  -3   3  270.26   19.31
   5  -3   3  269.86   19.19
   5   3   3  332.91   18.51
  -5   3  -3  252.13   19.39
   5   3   3  342.90   18.38
  -5   3  -3  269.74   19.33
  -6  -3  -3   24.31    2.57
   6  -3   3   22.11    2.90
  -6  -3  -3   26.09    2.46
  -6  -3  -3   31.36    2.48
   6  -3   3   25.22    2.91
   6  -3   3   22.58    2.67
   6   3   3   29.73    1.99
  -6   3  -3   21.93    2.72
  -6   3  -3   18.81    2.72
  -6   3  -3   22.05    2.78
   6   3   3   27.45    2.09
   6   3   3   26.91    2.33
   7  -3   3  206.00   14.90
  -7  -3  -3  247.64   14.32
   7  -3   3  205.30   14.58
   7  -3   3  191.74   14.72
  -7  -3  -3  226.13   14.39
  -7  -3  -3  224.99   15.01
   7   3   3  243.43   14.25
   7   3   3  220.41   13.68
  -7   3  -3  196.03   14.62
  -7   3  -3  179.44   14.46
   7   3   3  223.28   13.87
  -7   3  -3  204.34   14.74
  -8  -3  -3   62.75    5.62
   8  -3   3   70.28    6.13
   8  -3   3   75.26    6.15
  -8  -3  -3   72.02    5.68
  -8  -3  -3   68.86    5.41
   8  -3   3   79.75    5.98
   8   3   3   61.89    4.83
   8   3   3   74.47    5.12
  -8   3  -3   72.18    6.05
  -8   3  -3   73.63    6.03
   8   3   3   69.14    5.38
   9  -3   3   51.05    5.32
   9  -3   3   50.62    5.20
  -9  -3  -3   57.54    4.71
  -9  -3  -3   55.98    4.95
  -9   3  -3   53.58    5.25
   9   3   3   61.93    4.41
   9   3   3   60.50    4.71
   9   3   3   54.44    4.08
  -9   3  -3   53.73    5.25
 -10  -3  -3   82.42    6.80
 -10  -3  -3   84.08    7.20
  10  -3   3  104.43    7.94
  10  -3   3  113.11    8.07
  10   3   3   83.21    6.48
 -10   3  -3  102.35    7.79
  10   3   3   71.52    6.72
 -10   3  -3   99.37    7.82
  10   3   3   89.95    6.27
 -11  -3  -3  132.08   11.10
  11  -3   3  170.74   11.87
 -11  -3  -3  138.97   10.65
  11  -3   3  181.73   12.03
 -11   3  -3  160.14   11.70
  11   3   3  153.26   10.13
  11   3   3  137.75   10.74
  11   3   3  140.43   10.32
 -11   3  -3  164.58   11.83
 -12  -3  -3   57.76    5.77
  12  -3   3   65.19    6.36
  12  -3   3   66.50    6.37
  12   3   3   63.10    5.47
  12   3   3   61.58    4.70
 -12   3  -3   58.21    6.36
  12   3   3   62.51    4.97
 -12   3  -3   63.41    6.37
 -13  -3  -3    3.00    2.12
  13  -3   3    3.48    2.37
  13  -3   3    3.19    2.09
 -13   3  -3    1.49    2.13
  13   3   3    3.94    1.28
 -13   3  -3    2.70    1.83
  13   3   3    2.18    1.40
  13   3   3    2.65    1.09
  14  -3   3    1.33    1.89
 -14  -3  -3   -0.04    1.76
  14  -3   3   -0.51    1.66
 -14  -3  -3    1.77    1.80
 -14   3  -3   -2.00    1.73
  14   3   3    0.59    1.61
 -14   3  -3    1.14    2.01
 -15  -3  -3  105.31    9.35
  15  -3   3  107.39    9.74
 -15  -3  -3   94.85    8.97
  15  -3   3  104.04    9.33
  15   3   3  100.57    8.57
 -15   3  -3  105.33    9.53
 -15   3  -3  115.40    9.85
  16  -3   3  106.20    9.64
  16  -3   3  107.14   10.11
 -16  -3  -3  113.62    9.88
 -16   3  -3  109.81   10.23
  16  -4  -3    2.12    2.24
 -16  -4   3    0.45    2.27
  16  -4  -3    4.61    2.65
 -16   4   3    1.77    4.03
 -16   4   3    3.68    2.67
  16   4  -3    1.69    1.60
  16   4  -3   -1.37    1.22
  15  -4  -3    4.77    2.46
  15  -4  -3    4.64    2.78
 -15  -4   3    6.41    2.58
  15   4  -3    4.60    1.90
 -15   4   3    4.38    2.63
 -15   4   3    2.65    2.50
  15   4  -3    5.46    2.09
 -14  -4   3   11.36    3.00
  14  -4  -3   12.61    3.54
  14  -4  -3    7.81    2.73
  14   4  -3    7.22    1.99
 -14   4   3    7.67    2.64
 -14   4   3   11.93    3.23
  14   4  -3    8.18    2.11
  13  -4  -3   19.17    4.23
 -13  -4   3   37.14    4.51
  13   4  -3   28.65    3.48
 -13   4   3   19.06    3.76
  13   4  -3   24.84    3.20
  13   4  -3   29.29    3.01
 -13   4   3   21.47    4.10
  12  -4  -3   13.29    3.13
  12  -4  -3   11.85    3.30
 -12  -4   3   13.37    2.14
 -12  -4   3   18.55    3.25
  12   4  -3   23.48    2.94
 -12   4   3   15.46    3.27
 -12   4   3   15.53    3.30
  12   4  -3   17.36    2.32
  12   4  -3   22.24    3.00
  11  -4  -3   60.61    6.49
 -11  -4   3   71.84    6.25
  11  -4  -3   59.23    6.30
 -11  -4   3   66.44    5.51
 -11   4   3   68.39    6.32
  11   4  -3   66.35    5.56
 -11   4   3   69.15    6.35
  11   4  -3   69.17    5.79
  10  -4  -3  426.68   33.09
  10  -4  -3  450.55   32.90
 -10  -4   3  515.92   31.85
 -10  -4   3  563.40   32.76
  10   4  -3  496.63   31.84
  10   4  -3  494.93   32.14
 -10   4   3  516.23   32.99
 -10   4   3  523.93   33.04
  10   4  -3  512.08   32.47
   9  -4  -3  562.47   40.09
  -9  -4   3  637.14   39.06
  -9  -4   3  668.98   39.77
   9  -4  -3  617.59   40.56
   9   4  -3  593.09   39.57
   9   4  -3  574.11   39.04
  -9   4   3  673.38   40.21
   9   4  -3  616.73   39.32
  -9   4   3  634.62   40.09
  -8  -4   3   58.84    5.17
   8  -4  -3   58.39    5.53
  -8  -4   3   66.23    5.19
   8  -4  -3   63.05    5.82
  -8  -4   3   65.19    4.65
  -8   4   3   64.11    5.45
   8   4  -3   71.77    5.66
  -8   4   3   55.99    5.23
   8   4  -3   63.80    4.71
  -8   4   3   63.09    5.51
   8   4  -3   65.38    4.90
  -8   4   3   62.44    5.39
   7  -4  -3  436.94   29.29
  -7  -4   3  444.09   27.61
   7  -4  -3  437.68   28.40
  -7  -4   3  450.72   28.01
  -7  -4   3  439.15   28.23
   7   4  -3  417.83   27.70
   7   4  -3  418.44   27.77
  -7   4   3  438.68   28.40
  -7   4   3  443.34   29.02
  -7   4   3  431.17   28.98
   7   4  -3  459.12   28.53
   6  -4  -3  159.02   10.00
  -6  -4   3  130.66    9.39
  -6  -4   3  135.45    9.30
   6  -4  -3  158.88   10.22
  -6  -4   3  130.42    9.66
  -6  -4   3  123.24    9.52
   6   4  -3  140.06    9.85
   6   4  -3  127.80    9.24
   6   4  -3  125.40    9.20
  -6   4   3  164.56   10.05
  -6   4   3  158.42    9.99
  -5  -4   3  238.46   15.72
   5  -4  -3  209.34   15.84
  -5  -4   3  229.31   15.39
   5  -4  -3  254.78   15.89
  -5  -4   3  223.11   15.63
   5   4  -3  234.36   15.35
  -5   4   3  253.73   15.82
   5   4  -3  245.52   15.80
  -5   4   3  242.27   15.83
   5   4  -3  237.95   15.23
  -5   4   3  263.63   15.90
  -4  -4   3 2016.58  128.16
  -4  -4   3 2040.42  128.17
   4  -4  -3 1900.96  128.29
   4  -4  -3 2231.23  128.29
  -4  -4   3 1877.92  127.81
  -4   4   3 2186.86  128.28
  -4   4   3 2134.11  128.20
   4   4  -3 1992.75  128.12
  -4   4   3 2234.20  128.21
   4   4  -3 2033.89  127.87
   4   4  -3 2069.13  127.66
  -3  -4   3  490.90   30.68
   3  -4  -3  497.38   30.62
   3  -4  -3  466.52   30.72
  -3  -4   3  498.79   30.74
  -3  -4   3  466.84   30.39
  -3   4   3  483.06   30.51
  -3   4   3  516.19   30.68
   3   4  -3  513.78   30.43
   3   4  -3  460.99   30.57
  -3   4   3  474.43   30.55
   3   4  -3  460.30   30.56
   2  -4  -3 1233.72   75.25
  -2  -4   3 1181.64   75.25
  -2  -4   3 1259.56   75.46
   2  -4  -3 1174.10   75.38
  -2  -4   3 1282.83   75.55
   2   4  -3 1271.68   75.23
  -2   4   3 1300.45   75.34
  -2   4   3 1193.32   75.23
   2   4  -3 1136.59   75.35
   2   4  -3 1109.03   75.38
  -2   4   3 1186.36   75.13
  -1  -4   3  270.65   17.78
  -1  -4   3  302.74   18.04
   1  -4  -3  254.92   17.57
   1  -4  -3  254.20   17.49
  -1  -4   3  294.73   17.92
   1  -4  -3  264.61   17.70
  -1   4   3  284.62   17.44
   1   4  -3  301.24   17.69
   1   4  -3  288.66   17.76
   1   4  -3  273.99   17.98
  -1   4   3  272.58   17.63
  -1   4   3  282.33   17.66
  -1   4   3  284.76   17.38
   0  -4   3   16.15    1.51
   0  -4   3   13.99    1.39
   0  -4  -3   10.94    0.96
   0  -4   3   15.57    1.54
   0  -4   3   14.66    1.45
   0  -4  -3   12.18    1.19
   0  -4  -3   11.45    1.10
   0  -4   3   14.88    1.43
   0   4   3   12.18    1.13
   0   4  -3   15.71    1.55
   0   4   3   13.05    1.18
   0   4   3   11.79    0.99
   0   4  -3   16.01    1.69
   1  -4   3  821.99   51.47
   1  -4   3  764.33   51.36
  -1  -4  -3  838.73   50.96
  -1  -4  -3  861.11   51.05
   1  -4   3  816.46   51.40
   1  -4   3  763.16   51.42
  -1  -4  -3  810.20   50.95
  -1   4  -3  724.26   51.35
  -1   4  -3  832.81   51.41
   1   4   3  952.46   51.05
   1   4   3  920.69   50.97
  -1   4  -3  816.41   51.46
  -1   4  -3  762.82   51.38
   2  -4   3  164.58   10.34
   2  -4   3  154.89   10.41
   2  -4   3  163.12   10.32
   2  -4   3  146.70   10.31
  -2   4  -3  167.21   10.50
  -2   4  -3  141.64   10.28
  -2   4  -3  142.26   10.23
  -2   4  -3  152.81   10.40
   3  -4   3  956.77   62.92
  -3  -4  -3  966.32   62.31
  -3  -4  -3 1018.62   62.16
   3  -4   3 1077.45   62.83
  -3  -4  -3  970.27   62.60
  -3  -4  -3 1016.99   62.01
   3  -4   3 1036.73   62.80
   3  -4   3  909.65   62.80
  -3  -4  -3  966.11   62.06
  -3   4  -3 1058.59   62.95
  -3   4  -3  980.01   62.87
  -3   4  -3 1091.36   63.10
   4  -4   3  129.34    8.84
  -4  -4  -3  127.56    8.51
   4  -4   3  125.18    9.05
  -4  -4  -3  125.08    8.30
  -4  -4  -3  126.82    8.20
   4  -4   3  128.80    8.81
  -4  -4  -3  136.57    8.19
  -4   4  -3  124.76    8.93
  -4   4  -3  121.14    8.88
  -4   4  -3  113.51    8.81
  -4   4  -3  130.61    9.14
  -5  -4  -3  130.35    9.39
  -5  -4  -3  136.18    9.10
   5  -4   3  142.78    9.93
   5  -4   3  142.13    9.77
   5  -4   3  144.63   10.05
  -5  -4  -3  129.76    9.12
  -5   4  -3  146.12    9.96
  -5   4  -3  153.17   10.21
  -5   4  -3  131.82    9.76
  -5   4  -3  138.67    9.82
   6  -4   3    6.10    1.80
   6  -4   3    5.84    1.60
  -6  -4  -3    1.17    0.75
  -6  -4  -3    1.79    0.87
   6  -4   3    4.68    1.43
  -6  -4  -3    2.47    0.76
  -6   4  -3    3.73    1.35
  -6   4  -3    6.32    1.54
   6   4   3    1.67    0.69
  -6   4  -3    2.33    1.33
  -7  -4  -3  474.26   27.43
   7  -4   3  398.97   28.23
  -7  -4  -3  452.93   28.27
   7  -4   3  432.28   28.26
  -7  -4  -3  441.79   27.60
   7  -4   3  423.84   28.06
  -7   4  -3  417.96   28.21
   7   4   3  470.06   27.39
  -7   4  -3  387.34   27.97
  -7   4  -3  399.68   28.06
  -8  -4  -3  974.66   58.55
  -8  -4  -3  930.84   58.99
   8  -4   3  957.82   59.55
   8  -4   3  951.57   59.65
  -8  -4  -3  904.99   58.81
   8   4   3  891.27   57.95
  -8   4  -3  910.55   59.32
  -8   4  -3  981.83   59.51
   8   4   3  955.07   58.53
   8   4   3  890.24   57.88
  -9  -4  -3  475.68   29.08
  -9  -4  -3  450.01   29.79
   9  -4   3  462.70   30.13
   9  -4   3  467.06   30.22
   9   4   3  453.75   29.04
  -9   4  -3  458.43   30.03
  -9   4  -3  433.81   29.86
   9   4   3  438.35   28.46
   9   4   3  445.69   28.37
  10  -4   3   14.08    2.98
  10  -4   3   13.56    2.77
 -10  -4  -3    8.72    1.77
 -10  -4  -3    8.70    2.06
 -10   4  -3    7.45    2.32
  10   4   3   11.15    1.96
  10   4   3    9.92    1.56
 -10   4  -3   12.63    2.74
  10   4   3    9.90    1.39
  11  -4   3    0.90    1.30
 -11  -4  -3   -0.26    0.95
  11  -4   3    0.59    1.57
 -11  -4  -3    0.30    1.26
 -11   4  -3    0.91    1.54
 -11   4  -3    0.94    1.62
  11   4   3    0.64    0.66
 -12  -4  -3  116.62    9.58
  12  -4   3  122.15   10.24
  12  -4   3  132.66   10.30
 -12   4  -3  113.98    9.97
  12   4   3  122.10    8.97
  12   4   3  118.24    8.13
 -12   4  -3  124.23   10.14
  13  -4   3   61.43    6.42
  13  -4   3   57.55    6.43
 -13  -4  -3   51.31    5.68
  13   4   3   65.32    5.43
 -13   4  -3   57.27    6.27
 -13   4  -3   60.15    6.48
 -14  -4  -3  102.39    8.89
  14  -4   3  107.90    9.47
  14  -4   3  112.72    9.63
 -14  -4  -3  112.33    9.27
 -14   4  -3   92.50    9.13
 -14   4  -3  106.97    9.58
  14   4   3  101.25    8.26
  15  -4   3    4.79    2.50
  15  -4   3    2.41    2.40
 -15  -4  -3    4.75    2.50
 -15  -4  -3    2.71    2.11
 -15   4  -3    4.73    2.77
 -15   4  -3    0.96    2.18
  16  -5  -3    2.54    2.55
 -16  -5   3    2.81    2.45
  16  -5  -3    2.78    2.52
  16   5  -3   -1.34    1.43
 -16   5   3   -0.54    2.40
 -16   5   3    1.21    3.71
  16   5  -3   -0.75    1.24
  15  -5  -3   22.61    4.88
  15  -5  -3   16.33    4.06
 -15  -5   3   20.92    4.09
 -15   5   3   22.20    4.34
 -15   5   3   21.82    4.22
  14  -5  -3   36.69    5.53
 -14  -5   3   35.28    4.88
  14  -5  -3   38.98    5.39
  14   5  -3   40.17    4.05
 -14   5   3   42.91    5.49
  14   5  -3   41.35    4.14
  14   5  -3   46.81    5.04
 -14   5   3   39.26    5.22
 -13  -5   3   12.81    2.98
  13  -5  -3    8.93    2.56
 -13  -5   3   10.52    2.10
  13  -5  -3   11.20    3.66
 -13   5   3    8.17    2.61
 -13   5   3   13.45    3.11
  13   5  -3   16.95    2.53
  12  -5  -3  113.41   10.52
 -12  -5   3  122.20    9.88
 -12  -5   3  127.38    8.91
  12  -5  -3  119.21   10.38
  12   5  -3  127.35    8.92
 -12   5   3  145.52   11.55
  12   5  -3  137.77   10.92
 -12   5   3  128.82   10.95
  12   5  -3  123.80    9.48
 -11  -5   3   33.89    3.91
  11  -5  -3   31.68    4.19
  11  -5  -3   30.61    4.53
 -11  -5   3   30.22    2.94
 -11   5   3   38.89    4.33
  11   5  -3   27.71    3.20
  11   5  -3   28.90    3.00
  11   5  -3   30.20    3.41
 -11   5   3   38.60    4.44
  10  -5  -3  400.42   25.04
 -10  -5   3  340.82   23.63
 -10  -5   3  341.38   22.89
  10  -5  -3  363.77   24.48
  10   5  -3  332.01   23.31
  10   5  -3  341.36   22.98
 -10   5   3  430.73   24.61
  10   5  -3  334.53   23.13
   9  -5  -3   78.56    6.96
   9  -5  -3   81.68    7.38
  -9  -5   3   78.97    6.31
  -9  -5   3   81.69    5.73
   9   5  -3   83.24    6.01
  -9   5   3   82.36    6.87
   9   5  -3   77.77    6.18
  -9   5   3   80.28    6.84
   9   5  -3   78.09    5.83
   9   5  -3   76.31    6.71
  -8  -5   3  493.25   30.66
  -8  -5   3  467.74   30.81
  -8  -5   3  488.51   30.12
   8  -5  -3  497.98   31.52
  -8   5   3  508.38   31.28
   8   5  -3  443.27   31.08
   8   5  -3  472.17   30.32
   8   5  -3  444.99   30.22
  -8   5   3  489.28   31.19
  -7  -5   3   48.56    4.15
   7  -5  -3   40.80    4.15
   7  -5  -3   43.23    4.48
  -7  -5   3   57.01    4.04
  -7  -5   3   47.75    4.12
  -7   5   3   44.15    4.16
  -7   5   3   42.51    4.17
   7   5  -3   44.84    3.57
  -7   5   3   45.18    4.25
   7   5  -3   50.34    3.67
   6  -5  -3  241.47   17.81
  -6  -5   3  267.51   17.54
  -6  -5   3  276.31   17.20
   6  -5  -3  261.93   19.32
  -6  -5   3  272.22   17.59
  -6   5   3  252.59   17.60
   6   5  -3  270.13   17.05
   6   5  -3  277.51   17.71
  -6   5   3  255.43   17.57
   6   5  -3  275.74   16.96
  -5  -5   3  352.35   24.57
   5  -5  -3  354.01   24.84
   5  -5  -3  391.64   24.76
  -5  -5   3  373.01   24.23
  -5  -5   3  378.14   24.64
   5   5  -3  345.02   23.94
  -5   5   3  414.08   24.83
  -5   5   3  423.37   24.80
   5   5  -3  370.04   24.60
  -5   5   3  425.82   24.74
  -4  -5   3  501.62   33.41
  -4  -5   3  497.74   33.00
   4  -5  -3  537.19   33.42
   4  -5  -3  461.83   33.45
  -4  -5   3  505.10   33.37
  -4   5   3  568.57   33.44
  -4   5   3  570.36   33.35
   4   5  -3  540.43   33.01
  -4   5   3  550.44   33.48
   4   5  -3  523.93   33.32
   4   5  -3  529.85   33.29
   4   5  -3  522.70   32.74
  -3  -5   3   19.06    1.97
  -3  -5   3   22.69    2.32
  -3  -5   3   22.06    2.20
   3   5  -3   23.13    2.18
   3   5  -3   23.94    2.22
   3   5  -3   23.51    1.93
  -2  -5   3  306.45   20.32
   2  -5  -3  297.23   20.26
  -2  -5   3  344.98   20.21
  -2  -5   3  334.94   20.50
   2  -5  -3  298.25   20.09
   2  -5  -3  294.24   20.05
   2   5  -3  306.50   20.37
  -2   5   3  319.39   20.19
  -2   5   3  306.62   19.95
  -2   5   3  303.07   20.14
   2   5  -3  369.70   20.01
   2   5  -3  312.25   20.28
   1  -5  -3 3665.82  225.53
   1  -5  -3 3733.51  225.04
   1  -5  -3 3412.76  227.32
   1  -5  -3 3398.46  226.68
   0  -5   3 2481.73  147.09
   0  -5  -3 2282.58  146.76
   0  -5  -3 2342.82  146.74
   0  -5   3 2393.65  147.05
   0  -5  -3 2360.23  146.56
   0  -5  -3 2326.40  146.48
   0  -5   3 2266.32  146.94
   0   5  -3 2175.33  147.21
   0   5  -3 2566.16  147.09
   0   5  -3 2369.27  147.14
   0   5  -3 2544.32  147.00
   1  -5   3   82.86    5.44
   1  -5   3   81.09    5.50
  -1  -5  -3   63.87    4.87
  -1  -5  -3   64.80    5.21
   1  -5   3   76.73    5.37
   1  -5   3   80.32    5.49
  -1  -5  -3   68.07    4.99
   1   5   3   68.45    4.99
  -1   5  -3   75.17    5.41
  -1   5  -3   71.70    5.37
  -1   5  -3   71.41    5.55
  -1   5  -3   85.63    5.53
  -1   5  -3   81.22    5.41
   1   5   3   71.57    4.98
  -2  -5  -3  261.72   16.12
   2  -5   3  260.67   16.61
  -2  -5  -3  269.33   15.87
   2  -5   3  229.72   16.52
  -2  -5  -3  260.14   16.18
   2  -5   3  225.92   16.58
  -2   5  -3  267.03   16.67
   2   5   3  266.67   16.13
  -2   5  -3  254.35   16.59
  -2   5  -3  255.74   16.70
  -2   5  -3  239.02   16.50
  -2   5  -3  232.58   16.64
   2   5   3  272.07   16.08
  -3  -5  -3    2.33    0.68
  -3  -5  -3    2.24    0.41
  -3  -5  -3    4.01    0.48
   3  -5   3    2.72    0.89
   3  -5   3    3.10    1.07
   3  -5   3    3.59    1.00
   3  -5   3    2.75    1.08
  -3  -5  -3    3.93    0.78
  -3   5  -3    2.11    0.99
  -3   5  -3    3.26    1.17
  -3   5  -3    3.70    1.15
  -3   5  -3    3.39    1.12
   3   5   3    2.40    0.78
   4  -5   3  352.64   23.05
  -4  -5  -3  396.11   22.44
  -4  -5  -3  390.20   22.25
  -4  -5  -3  395.10   22.30
   4  -5   3  326.73   23.24
  -4  -5  -3  348.20   22.58
   4  -5   3  316.67   23.11
  -4  -5  -3  349.56   22.66
   4  -5   3  349.29   23.05
  -4   5  -3  362.48   23.28
  -4   5  -3  323.38   23.12
  -4   5  -3  350.53   23.17
  -4   5  -3  353.75   23.38
  -5  -5  -3   12.94    1.71
  -5  -5  -3   16.61    1.90
  -5  -5  -3   16.33    1.60
  -5  -5  -3   18.35    1.52
   5  -5   3   25.18    2.65
  -5   5  -3   21.87    2.56
  -5   5  -3   21.36    4.00
  -6  -5  -3  415.23   26.88
  -6  -5  -3  439.33   27.25
  -6  -5  -3  425.78   27.41
   6  -5   3  447.43   28.22
   6  -5   3  470.03   28.17
  -6  -5  -3  405.97   27.06
   6  -5   3  430.47   27.86
  -6   5  -3  433.29   28.03
  -6   5  -3  388.50   27.80
  -6   5  -3  428.07   27.92
  -7  -5  -3   65.70    5.19
  -7  -5  -3   68.87    4.63
   7  -5   3   56.39    5.66
  -7  -5  -3   71.89    5.02
   7  -5   3   62.03    5.66
  -7   5  -3   51.74    5.32
  -8  -5  -3   18.30    2.63
   8  -5   3   25.41    3.48
  -8  -5  -3   18.21    2.06
   8  -5   3   25.15    3.36
  -8  -5  -3   17.43    2.37
  -8   5  -3   26.28    3.35
  -8   5  -3   20.40    3.04
  -9  -5  -3  160.25   11.00
   9  -5   3  126.22   10.93
   9  -5   3  128.41   10.84
  -9  -5  -3  160.24    9.82
  -9   5  -3  113.74   10.54
  -9   5  -3  135.83   10.87
   9   5   3  170.39    9.97
  10  -5   3   90.45    8.00
  10  -5   3   89.58    8.06
 -10  -5  -3   94.17    7.38
 -10  -5  -3   93.34    6.70
 -10   5  -3   98.42    8.09
  10   5   3  100.29    6.88
 -10   5  -3   78.82    7.71
  11  -5   3   25.95    4.12
 -11  -5  -3   15.72    2.80
 -11  -5  -3   17.70    2.22
  11  -5   3   22.81    4.06
  11   5   3   15.81    2.42
 -11   5  -3   19.15    3.72
 -11   5  -3   21.54    3.68
  12  -5   3  155.68   13.32
 -12  -5  -3  141.44   10.35
  12  -5   3  153.39   12.05
 -12  -5  -3  143.73   11.33
 -12   5  -3  146.78   11.90
 -12   5  -3  167.82   12.28
  13  -5   3    9.82    3.20
  13  -5   3    9.90    3.00
 -13   5  -3    6.32    2.86
 -13   5  -3   11.49    3.30
 -14  -5  -3  219.25   15.15
  14  -5   3  186.84   15.30
  14  -5   3  188.29   15.33
 -14   5  -3  184.23   15.23
 -14   5  -3  212.51   15.63
  15  -5   3   -1.55    2.09
 -15  -5  -3   -0.61    1.88
  15  -5   3    2.64    2.24
 -15  -5  -3    2.39    2.30
 -15   5  -3   -2.40    1.83
  16  -6  -3    4.78    4.50
  16  -6  -3    8.99    4.34
 -16  -6   3    8.47    2.68
 -16   6   3    9.96    3.32
 -16   6   3    4.02    2.63
  15  -6  -3   40.96    6.63
 -15  -6   3   34.21    5.18
  15  -6  -3   37.59    5.99
 -15   6   3   50.53    5.88
 -15   6   3   41.57    6.36
 -14  -6   3   -0.74    1.61
  14  -6  -3    1.08    2.49
  14  -6  -3   -2.40    1.41
 -14   6   3   -3.47    1.60
 -14   6   3    1.65    2.26
  14   6  -3    0.49    0.80
  14   6  -3   -0.08    0.85
  13  -6  -3   82.52    8.41
 -13  -6   3   79.85    7.33
 -13  -6   3   73.04    6.01
  13  -6  -3   89.33    8.21
 -13   6   3   72.27    7.58
  13   6  -3   88.84    6.15
 -13   6   3   84.17    7.87
  13   6  -3   82.83    6.21
 -12  -6   3  271.17   17.90
 -12  -6   3  276.45   19.15
  12  -6  -3  238.59   20.28
  12   6  -3  291.33   18.00
 -12   6   3  239.45   19.39
  12   6  -3  294.89   18.20
  12   6  -3  291.92   18.24
 -12   6   3  285.17   19.72
 -11  -6   3    6.47    1.33
  11  -6  -3    7.62    2.60
  11  -6  -3    3.01    2.00
 -11  -6   3    7.33    2.02
  11   6  -3    8.82    1.55
  11   6  -3   10.33    1.75
 -11   6   3    4.54    2.21
 -11   6   3    7.00    2.22
  11   6  -3    8.31    1.63
  10  -6  -3   21.78    3.75
  10  -6  -3   22.77    3.96
 -10  -6   3   12.37    2.39
  10   6  -3   11.29    1.73
  10   6  -3   12.68    2.03
  10   6  -3   13.97    2.03
   9  -6  -3   99.66    8.30
   9  -6  -3   94.31    8.03
  -9  -6   3   94.18    7.10
   9   6  -3   89.28    6.48
   9   6  -3   91.22    6.74
   9   6  -3   91.19    6.55
  -9   6   3   99.24    7.77
   9   6  -3   87.45    7.57
  -9   6   3   87.94    7.51
  -8  -6   3   69.40    6.24
   8  -6  -3   72.56    6.71
   8  -6  -3   80.92    6.64
  -8  -6   3   67.23    5.48
  -8   6   3   79.39    6.25
   8   6  -3   75.40    5.18
   8   6  -3   67.72    5.12
   8   6  -3   65.33    5.97
  -8   6   3   69.86    6.07
   8   6  -3   71.14    5.36
   7  -6  -3   47.82    4.74
  -7  -6   3   47.59    4.25
  -7  -6   3   47.35    3.89
   7  -6  -3   48.84    4.47
  -7  -6   3   54.67    4.43
  -7   6   3   44.72    4.79
   7   6  -3   50.17    3.64
   7   6  -3   48.03    4.44
  -7   6   3   43.50    4.27
  -7   6   3   40.10    4.19
   7   6  -3   46.92    3.53
  -6  -6   3   51.57    4.20
  -6  -6   3   49.42    3.70
   6  -6  -3   37.19    3.99
   6   6  -3   52.06    3.96
  -6   6   3   39.46    3.99
  -6   6   3   40.56    3.98
   6   6  -3   50.40    3.36
  -6   6   3   41.11    4.11
   6   6  -3   46.29    4.08
  -5  -6   3  725.27   47.68
  -5  -6   3  778.51   47.20
   5  -6  -3  760.37   47.72
  -5  -6   3  740.09   47.66
   5  -6  -3  658.24   47.78
  -5   6   3  778.70   47.60
   5   6  -3  742.77   46.81
  -5   6   3  794.07   47.74
   5   6  -3  767.16   47.61
   5   6  -3  768.46   47.05
  -5   6   3  775.03   47.78
  -4  -6   3   55.55    4.89
   4  -6  -3   77.27    5.39
  -4  -6   3   59.18    4.57
  -4  -6   3   61.29    4.94
   4   6  -3   72.15    4.99
   4   6  -3   58.59    4.18
   4   6  -3   56.66    4.37
   4   6  -3   71.91    4.97
   3  -6  -3  209.72   15.55
  -3  -6   3  247.40   15.66
  -3  -6   3  249.74   15.77
   3  -6  -3  211.92   15.33
  -3  -6   3  243.86   15.34
   3  -6  -3  217.53   15.39
   3   6  -3  251.68   15.58
   3   6  -3  256.00   15.03
   3   6  -3  267.77   15.70
  -3   6   3  225.91   15.48
  -3   6   3  233.74   15.50
  -3   6   3  214.03   15.23
   3   6  -3  247.71   15.16
  -2  -6   3  245.33   16.53
  -2  -6   3  240.10   16.69
   2  -6  -3  249.34   16.50
   2  -6  -3  260.21   16.46
  -2  -6   3  241.13   16.82
   2  -6  -3  254.87   16.71
   2   6  -3  256.74   16.72
   2   6  -3  269.72   16.92
   2   6  -3  264.40   16.31
  -2   6   3  258.35   16.29
   2   6  -3  256.43   16.39
  -2   6   3  257.51   16.62
  -2   6   3  263.58   16.34
  -2   6   3  269.67   16.62
  -1  -6   3  191.42   13.42
   1  -6  -3  229.14   12.95
  -1  -6   3  179.62   13.12
   1  -6  -3  215.00   13.21
  -1  -6   3  177.72   13.20
   1  -6  -3  218.75   13.09
   1   6  -3  187.99   13.86
  -1   6   3  212.31   13.18
  -1   6   3  215.86   12.89
  -1   6   3  216.88   13.06
   1   6  -3  182.77   13.44
   1   6  -3  180.68   13.25
   0  -6   3   69.12    4.66
   0  -6  -3   51.82    4.23
   0  -6  -3   53.94    4.07
   0  -6  -3   49.55    4.22
   0  -6   3   71.56    4.69
   0  -6   3   71.03    4.56
   0  -6   3   71.92    4.87
   0  -6  -3   54.85    4.02
   0  -6   3   70.69    4.70
   0   6   3   52.05    4.13
   0   6   3   52.58    4.09
   0   6  -3   75.26    4.87
   0   6   3   52.32    4.34
   0   6  -3   74.71    4.68
   1  -6   3  384.07   25.87
   1  -6   3  381.67   25.78
   1  -6   3  411.67   25.98
  -1  -6  -3  387.28   25.48
   1  -6   3  392.12   25.79
  -1  -6  -3  399.21   25.33
  -1  -6  -3  402.12   25.36
   1   6   3  402.97   25.30
  -1   6  -3  425.15   25.91
   1   6   3  405.24   25.24
   1   6   3  403.67   25.52
  -1   6  -3  422.04   25.96
  -1   6  -3  400.15   26.10
  -1   6  -3  428.27   25.95
  -1   6  -3  420.78   25.87
   2  -6   3 1152.65   71.96
  -2  -6  -3 1203.32   71.23
  -2  -6  -3 1123.93   71.50
   2  -6   3 1174.32   72.06
   2  -6   3 1076.76   72.05
   2  -6   3 1132.26   72.02
  -2  -6  -3 1109.41   71.59
   2   6   3 1123.91   71.48
  -2   6  -3 1108.60   72.18
  -2   6  -3 1181.35   72.06
  -2   6  -3 1204.59   72.06
   2   6   3 1163.75   71.47
  -2   6  -3 1204.75   72.06
  -2   6  -3 1159.44   72.14
  -3  -6  -3  736.49   39.96
   3  -6   3  616.97   40.17
   3  -6   3  603.35   40.17
  -3  -6  -3  712.87   39.83
   3  -6   3  546.21   40.17
  -3   6  -3  636.66   40.29
  -3   6  -3  632.49   40.22
  -3   6  -3  635.58   40.46
  -3   6  -3  596.56   40.37
  -3   6  -3  621.63   40.32
  -4  -6  -3 1409.00   83.58
   4  -6   3 1197.93   84.05
   4  -6   3 1225.34   84.18
  -4  -6  -3 1377.82   83.03
   4  -6   3 1323.45   83.99
   4  -6   3 1375.73   84.03
  -4  -6  -3 1414.91   83.60
  -4   6  -3 1387.37   84.15
   4   6   3 1430.86   83.69
  -4   6  -3 1263.71   84.14
  -4   6  -3 1368.57   84.36
  -4   6  -3 1333.22   84.19
  -5  -6  -3    4.59    0.79
  -5  -6  -3    4.35    1.07
   5  -6   3    3.96    1.25
  -5  -6  -3    2.48    0.83
   5  -6   3    3.78    1.28
  -5   6  -3    3.98    1.29
  -5   6  -3    4.51    1.52
   6  -6   3    7.18    1.87
  -6  -6  -3   10.60    1.72
  -6  -6  -3    9.45    0.97
  -6  -6  -3    9.39    1.58
   6  -6   3    8.78    1.97
  -6  -6  -3    9.06    1.31
   6  -6   3    7.50    2.09
  -6   6  -3   10.79    2.11
  -6   6  -3   13.22    2.44
  -6   6  -3    8.80    2.05
  -7  -6  -3    1.21    1.01
  -7  -6  -3    1.94    0.64
  -7  -6  -3    1.87    0.94
   7  -6   3   -0.74    1.15
   7  -6   3    0.13    1.46
  -7  -6  -3    1.38    1.14
  -7   6  -3    1.82    1.43
  -7   6  -3    0.42    1.07
  -8  -6  -3 1937.40  127.43
  -8  -6  -3 1881.29  126.71
   8  -6   3 2233.73  128.00
  -8  -6  -3 2024.22  126.28
   8  -6   3 2110.02  128.01
  -8  -6  -3 1866.97  126.65
  -8   6  -3 1982.91  127.61
  -8   6  -3 2278.07  127.88
   9  -6   3   62.30    6.37
   9  -6   3   64.13    6.54
  -9  -6  -3   76.39    5.04
  -9  -6  -3   72.65    5.68
  -9  -6  -3   71.98    5.72
  -9   6  -3   65.38    6.40
  -9   6  -3   68.54    6.45
  10  -6   3   20.36    3.77
  10  -6   3   24.07    4.18
 -10  -6  -3   24.29    2.25
 -10  -6  -3   20.92    2.94
 -10   6  -3   26.39    3.81
 -10   6  -3   22.10    3.73
 -11  -6  -3   10.95    1.65
  11  -6   3    8.37    2.72
  11  -6   3   15.37    3.50
 -11  -6  -3   13.29    2.59
[truncated: 1,663,662 more chars]
