# Supplementary material for: Nucleophilic Substitution at a Coordinatively Saturated Five-Membered NHC∙Haloborane Centre
Source: MDPI journal article supplement (doi:10.3390/inorganics10070097), 2022-07-07
Supplement: s1 [file s1 › Cif_5a.cif]

data_mo_gar_116_0m_a
_audit_creation_date               2022-06-17
_audit_creation_method
;
Olex2 1.5
(compiled 2021.08.20 svn.r13c46975 for OlexSys, GUI svn.r6405)
;
_shelx_SHELXL_version_number       '2018/3'
_audit_contact_author_address      ?
_audit_contact_author_email        ?
_audit_contact_author_name         ''
_audit_contact_author_phone        ?
_publ_contact_author_id_orcid      ?
_publ_section_references
;
Dolomanov, O.V., Bourhis, L.J., Gildea, R.J, Howard, J.A.K. & Puschmann, H.
 (2009), J. Appl. Cryst. 42, 339-341.

Sheldrick, G.M. (2015). Acta Cryst. C71, 3-8.
;
_chemical_name_common              ?
_chemical_name_systematic          ?
_chemical_formula_moiety           'C34 H43 B Cl F3 N2 O3 S, C7 H8'
_chemical_formula_sum              'C41 H51 B Cl F3 N2 O3 S'
_chemical_formula_weight           755.15
_chemical_melting_point            ?
loop_
  _atom_type_symbol
  _atom_type_description
  _atom_type_scat_dispersion_real
  _atom_type_scat_dispersion_imag
  _atom_type_scat_source
 'C' 'C' 0.0033 0.0016 'International Tables Vol C Tables 4.2.6.8 and 6.1.1.4'
 'H' 'H' 0.0000 0.0000 'International Tables Vol C Tables 4.2.6.8 and 6.1.1.4'
 'B' 'B' 0.0013 0.0007 'International Tables Vol C Tables 4.2.6.8 and 6.1.1.4'
 'Cl' 'Cl' 0.1484 0.1585 'International Tables Vol C Tables 4.2.6.8 and 6.1.1.4'
 'F' 'F' 0.0171 0.0103 'International Tables Vol C Tables 4.2.6.8 and 6.1.1.4'
 'N' 'N' 0.0061 0.0033 'International Tables Vol C Tables 4.2.6.8 and 6.1.1.4'
 'O' 'O' 0.0106 0.0060 'International Tables Vol C Tables 4.2.6.8 and 6.1.1.4'
 'S' 'S' 0.1246 0.1234 'International Tables Vol C Tables 4.2.6.8 and 6.1.1.4'

_shelx_space_group_comment
;
The symmetry employed for this shelxl refinement is uniquely defined
by the following loop, which should always be used as a source of
symmetry information in preference to the above space-group names.
They are only intended as comments.
;
_space_group_crystal_system        'monoclinic'
_space_group_IT_number             14
_space_group_name_H-M_alt          'P 1 21/n 1'
_space_group_name_Hall             '-P 2yn'
loop_
  _space_group_symop_operation_xyz
 'x, y, z'
 '-x+1/2, y+1/2, -z+1/2'
 '-x, -y, -z'
 'x-1/2, -y-1/2, z-1/2'

_cell_length_a                     16.0556(5)
_cell_length_b                     22.2837(7)
_cell_length_c                     23.3059(7)
_cell_angle_alpha                  90
_cell_angle_beta                   107.6690(10)
_cell_angle_gamma                  90
_cell_volume                       7945.0(4)
_cell_formula_units_Z              8
_cell_measurement_reflns_used      9549
_cell_measurement_temperature      100(2)
_cell_measurement_theta_max        33.14
_cell_measurement_theta_min        2.26
_shelx_estimated_absorpt_T_max     0.961
_shelx_estimated_absorpt_T_min     0.949
_exptl_absorpt_coefficient_mu      0.203
_exptl_absorpt_correction_T_max    0.7465
_exptl_absorpt_correction_T_min    0.7005
_exptl_absorpt_correction_type     multi-scan
_exptl_absorpt_process_details    
 'SADABS-2016/2 (Bruker,2016/2) was used for absorption correction. wR2(int) was 0.0934 before and 0.0676 after correction. The Ratio of minimum to maximum transmission is 0.9384. The \l/2 correction factor is Not present.'
_exptl_absorpt_special_details     ?
_exptl_crystal_colour              colourless
_exptl_crystal_colour_primary      colourless
_exptl_crystal_density_diffrn      1.263
_exptl_crystal_density_meas        ?
_exptl_crystal_density_method      ?
_exptl_crystal_description         block
_exptl_crystal_F_000               3200
_exptl_crystal_size_max            0.26
_exptl_crystal_size_mid            0.22
_exptl_crystal_size_min            0.2
_exptl_transmission_factor_max     ?
_exptl_transmission_factor_min     ?
_diffrn_reflns_av_R_equivalents    0.0508
_diffrn_reflns_av_unetI/netI       0.0187
_diffrn_reflns_Laue_measured_fraction_full  0.992
_diffrn_reflns_Laue_measured_fraction_max  0.992
_diffrn_reflns_limit_h_max         19
_diffrn_reflns_limit_h_min         -19
_diffrn_reflns_limit_k_max         26
_diffrn_reflns_limit_k_min         -26
_diffrn_reflns_limit_l_max         27
_diffrn_reflns_limit_l_min         -27
_diffrn_reflns_number              196375
_diffrn_reflns_point_group_measured_fraction_full  0.992
_diffrn_reflns_point_group_measured_fraction_max  0.992
_diffrn_reflns_theta_full          24.999
_diffrn_reflns_theta_max           24.999
_diffrn_reflns_theta_min           2.047
_diffrn_ambient_temperature        100.0
_diffrn_detector_area_resol_mean   ?
_diffrn_measured_fraction_theta_full  0.992
_diffrn_measured_fraction_theta_max  0.992
_diffrn_measurement_device_type    'Bruker D8 VENTURE Kappa Duo PHOTON II CPAD'
_diffrn_measurement_method         '\f and \w scans'
_diffrn_radiation_type             MoK\a
_diffrn_radiation_wavelength       0.71073
_diffrn_source                     ?
_reflns_Friedel_coverage           0.000
_reflns_Friedel_fraction_full      .
_reflns_Friedel_fraction_max       .
_reflns_number_gt                  12543
_reflns_number_total               13881
_reflns_special_details
;
 Reflections were merged by SHELXL according to the crystal
 class for the calculation of statistics and refinement.
 
 _reflns_Friedel_fraction is defined as the number of unique
 Friedel pairs measured divided by the number that would be
 possible theoretically, ignoring centric projections and
 systematic absences.
;
_reflns_threshold_expression       'I > 2\s(I)'
_computing_cell_refinement         'SAINT V8.40A (?, 2016)'
_computing_data_collection         ?
_computing_data_reduction          'SAINT V8.40A (?, 2016)'
_computing_molecular_graphics      'Olex2 1.5 (Dolomanov et al., 2009)'
_computing_publication_material    'Olex2 1.5 (Dolomanov et al., 2009)'
_computing_structure_refinement    'ShelXL (Sheldrick, 2015)'
_computing_structure_solution      'SHELXT 2014/5 (Sheldrick, 2014)'
_refine_diff_density_max           1.111
_refine_diff_density_min           -0.427
_refine_diff_density_rms           0.060
_refine_ls_extinction_coef         .
_refine_ls_extinction_method       none
_refine_ls_goodness_of_fit_ref     1.136
_refine_ls_hydrogen_treatment      constr
_refine_ls_matrix_type             full
_refine_ls_number_parameters       975
_refine_ls_number_reflns           13881
_refine_ls_number_restraints       0
_refine_ls_R_factor_all            0.0508
_refine_ls_R_factor_gt             0.0463
_refine_ls_restrained_S_all        1.136
_refine_ls_shift/su_max            0.001
_refine_ls_shift/su_mean           0.000
_refine_ls_structure_factor_coef   Fsqd
_refine_ls_weighting_details      
 'w=1/[\s^2^(Fo^2^)+(0.0753P)^2^+5.2943P] where P=(Fo^2^+2Fc^2^)/3'
_refine_ls_weighting_scheme        calc
_refine_ls_wR_factor_gt            0.1329
_refine_ls_wR_factor_ref           0.1386
_refine_special_details            ?
_olex2_refinement_description
;
1. Others
 Sof(S2)=1-FVAR(1)
 Sof(S1)=FVAR(1)
 Sof(S4)=1-FVAR(2)
 Sof(S3)=FVAR(2)
2.a Ternary CH refined with riding coordinates:
 C2(H2), C12(H12), C19(H19), C29(H29), C37(H37), C49(H49), C64(H64), C67(H67)
2.b Secondary CH2 refined with riding coordinates:
 C23(H23A,H23B), C24(H24A,H24B), C56(H56A,H56B), C57(H57A,H57B)
2.c Aromatic/amide H refined with riding coordinates:
 C8(H8), C9(H9), C10(H10), C15(H15), C16(H16), C17(H17), C25(H25), C26(H26),
 C27(H27), C34(H34), C35(H35), C43(H43), C44(H44), C45(H45), C46(H46), C47(H47),
  C52(H52), C54(H54), C55(H55), C60(H60), C61(H61), C62(H62), C73(H73),
 C74(H74), C75(H75), C76(H76), C77(H77), C80(H80), C81(H81), C82(H82), C83(H83),
  C84(H84)
2.d Idealised Me refined as rotating group:
 C1(H1A,H1B,H1C), C11(H11A,H11B,H11C), C13(H13A,H13B,H13C), C20(H20A,H20B,
 H20C), C21(H21A,H21B,H21C), C30(H30A,H30B,H30C), C31(H31A,H31B,H31C), C32(H32A,
 H32B,H32C), C36(H36A,H36B,H36C), C50(H50A,H50B,H50C), C51(H51A,H51B,H51C),
 C65(H65A,H65B,H65C), C66(H66A,H66B,H66C), C68(H68A,H68B,H68C), C69(H69A,H69B,
 H69C), C70(H70A,H70B,H70C), C71(H71A,H71B,H71C), C78(H78A,H78B,H78C)
;
_atom_sites_solution_hydrogens     geom
_atom_sites_solution_primary       ?
_atom_sites_solution_secondary     ?
loop_
  _atom_site_label
  _atom_site_type_symbol
  _atom_site_fract_x
  _atom_site_fract_y
  _atom_site_fract_z
  _atom_site_U_iso_or_equiv
  _atom_site_adp_type
  _atom_site_occupancy
  _atom_site_site_symmetry_order
  _atom_site_calc_flag
  _atom_site_refinement_flags_posn
  _atom_site_refinement_flags_adp
  _atom_site_refinement_flags_occupancy
  _atom_site_disorder_assembly
  _atom_site_disorder_group
 Cl1 Cl 0.52004(3) 0.72471(2) 0.22258(2) 0.01622(12) Uani 1 1 d . . . . .
 Cl2 Cl 0.02091(3) 0.76349(2) 0.21976(2) 0.01748(12) Uani 1 1 d . . . . .
 S3 S 0.53425(3) 0.85391(2) 0.15945(2) 0.01427(17) Uani 0.933(2) 1 d . . P A 3
 S1 S 0.04016(3) 0.60374(2) 0.19266(2) 0.01312(18) Uani 0.881(2) 1 d . . P B 1
 O1 O 0.46789(8) 0.84234(6) 0.19322(5) 0.0156(3) Uani 1 1 d . . . . .
 F2 F 0.50533(9) 0.96665(5) 0.17817(6) 0.0353(3) Uani 1 1 d . . . . .
 F3 F 0.41806(8) 0.92956(6) 0.09617(6) 0.0360(3) Uani 1 1 d . . . . .
 F4 F 0.55115(9) 0.94851(6) 0.10114(6) 0.0415(4) Uani 1 1 d . . . . .
 F5 F 0.06017(9) 0.57896(7) 0.08987(6) 0.0435(4) Uani 1 1 d . . . . .
 F6 F -0.07429(9) 0.58812(9) 0.08734(6) 0.0546(5) Uani 1 1 d . . . . .
 F7 F 0.00980(12) 0.66886(7) 0.09599(7) 0.0531(4) Uani 1 1 d . . . . .
 O0AA O 0.62143(8) 0.86008(6) 0.19938(6) 0.0245(3) Uani 1 1 d . . . . .
 O2 O 0.51799(10) 0.81928(7) 0.10589(7) 0.0305(3) Uani 1 1 d . . . . .
 O3 O -0.02872(8) 0.64324(6) 0.20694(6) 0.0175(3) Uani 1 1 d . . . . .
 O4 O 0.02466(10) 0.54134(6) 0.20063(7) 0.0316(4) Uani 1 1 d . . . . .
 O5 O 0.12565(8) 0.62947(7) 0.21207(6) 0.0247(3) Uani 1 1 d . . . . .
 N1 N 0.37080(9) 0.74801(6) 0.29411(6) 0.0117(3) Uani 1 1 d . . . . .
 N2 N 0.30967(9) 0.78237(6) 0.20356(6) 0.0118(3) Uani 1 1 d . . . . .
 N3 N -0.12533(9) 0.74921(6) 0.29825(6) 0.0120(3) Uani 1 1 d . . . . .
 N4 N -0.18592(9) 0.71095(6) 0.20938(6) 0.0113(3) Uani 1 1 d . . . . .
 C1 C 0.42917(15) 0.89986(10) 0.41979(10) 0.0308(5) Uani 1 1 d . . . . .
 H1A H 0.416480 0.894976 0.458089 0.046 Uiso 1 1 calc GR . . . .
 H1B H 0.404605 0.937940 0.401137 0.046 Uiso 1 1 calc GR . . . .
 H1C H 0.492596 0.899923 0.427139 0.046 Uiso 1 1 calc GR . . . .
 C2 C 0.38825(13) 0.84786(8) 0.37758(8) 0.0200(4) Uani 1 1 d . . . . .
 H2 H 0.392571 0.858032 0.336788 0.024 Uiso 1 1 calc R . . . .
 C3 C 0.43451(12) 0.78795(9) 0.39607(8) 0.0178(4) Uani 1 1 d . . . . .
 C4 C 0.42737(11) 0.74051(8) 0.35499(8) 0.0143(4) Uani 1 1 d . . . . .
 C5 C 0.38391(11) 0.77961(7) 0.24863(7) 0.0103(3) Uani 1 1 d . . . . .
 B2 B 0.48189(12) 0.79863(9) 0.24603(8) 0.0118(4) Uani 1 1 d . . . . .
 C7 C 0.55024(11) 0.82562(8) 0.30527(8) 0.0155(4) Uani 1 1 d . . . . .
 C8 C 0.61438(12) 0.79042(10) 0.34585(8) 0.0208(4) Uani 1 1 d . . . . .
 H8 H 0.615477 0.748344 0.339533 0.025 Uiso 1 1 calc R . . . .
 C9 C 0.67561(13) 0.81577(11) 0.39456(9) 0.0287(5) Uani 1 1 d . . . . .
 H9 H 0.718231 0.791037 0.421345 0.034 Uiso 1 1 calc R . . . .
 C10 C 0.67563(15) 0.87756(12) 0.40495(10) 0.0351(5) Uani 1 1 d . . . . .
 H10 H 0.717919 0.894859 0.438636 0.042 Uiso 1 1 calc R . . . .
 C11 C 0.30950(14) 0.96713(10) 0.21824(10) 0.0302(5) Uani 1 1 d . . . . .
 H11A H 0.369180 0.960359 0.216870 0.045 Uiso 1 1 calc GR . . . .
 H11B H 0.311535 0.983890 0.257515 0.045 Uiso 1 1 calc GR . . . .
 H11C H 0.279580 0.995322 0.186369 0.045 Uiso 1 1 calc GR . . . .
 C12 C 0.25975(12) 0.90738(8) 0.20877(9) 0.0195(4) Uani 1 1 d . . . . .
 H12 H 0.289683 0.880177 0.242930 0.023 Uiso 1 1 calc R . . . .
 C13 C 0.16553(14) 0.91778(9) 0.21051(10) 0.0280(5) Uani 1 1 d . . . . .
 H13A H 0.134626 0.944093 0.177153 0.042 Uiso 1 1 calc GR . . . .
 H13B H 0.167145 0.936631 0.248826 0.042 Uiso 1 1 calc GR . . . .
 H13C H 0.134985 0.879213 0.206668 0.042 Uiso 1 1 calc GR . . . .
 C14 C 0.25941(11) 0.87660(8) 0.15049(8) 0.0156(4) Uani 1 1 d . . . . .
 C15 C 0.22861(12) 0.90730(8) 0.09607(9) 0.0199(4) Uani 1 1 d . . . . .
 H15 H 0.210607 0.947921 0.096003 0.024 Uiso 1 1 calc R . . . .
 C16 C 0.22388(12) 0.87941(9) 0.04209(8) 0.0207(4) Uani 1 1 d . . . . .
 H16 H 0.203173 0.901082 0.005392 0.025 Uiso 1 1 calc R . . . .
 C17 C 0.24914(12) 0.82018(8) 0.04134(8) 0.0190(4) Uani 1 1 d . . . . .
 H17 H 0.244806 0.801498 0.003904 0.023 Uiso 1 1 calc R . . . .
 C18 C 0.28088(11) 0.78730(8) 0.09448(8) 0.0147(4) Uani 1 1 d . . . . .
 C19 C 0.30339(12) 0.72135(8) 0.09190(8) 0.0171(4) Uani 1 1 d . . . . .
 H19 H 0.332982 0.707434 0.133964 0.020 Uiso 1 1 calc R . . . .
 C20 C 0.36598(13) 0.71106(9) 0.05487(9) 0.0227(4) Uani 1 1 d . . . . .
 H20A H 0.339998 0.726977 0.014139 0.034 Uiso 1 1 calc GR . . . .
 H20B H 0.376696 0.667953 0.052632 0.034 Uiso 1 1 calc GR . . . .
 H20C H 0.421385 0.731643 0.074065 0.034 Uiso 1 1 calc GR . . . .
 C21 C 0.21955(13) 0.68421(9) 0.06661(9) 0.0234(4) Uani 1 1 d . . . . .
 H21A H 0.180599 0.690941 0.091226 0.035 Uiso 1 1 calc GR . . . .
 H21B H 0.234570 0.641521 0.067479 0.035 Uiso 1 1 calc GR . . . .
 H21C H 0.190033 0.696482 0.025017 0.035 Uiso 1 1 calc GR . . . .
 C22 C 0.28653(11) 0.81704(8) 0.14851(8) 0.0130(3) Uani 1 1 d . . . . .
 C23 C 0.28377(11) 0.71850(8) 0.27509(8) 0.0168(4) Uani 1 1 d . . . . .
 H23A H 0.254365 0.721591 0.306668 0.020 Uiso 1 1 calc R . . . .
 H23B H 0.288456 0.675702 0.265078 0.020 Uiso 1 1 calc R . . . .
 C24 C 0.23649(11) 0.75431(9) 0.22011(8) 0.0188(4) Uani 1 1 d . . . . .
 H24A H 0.201186 0.728060 0.187484 0.023 Uiso 1 1 calc R . . . .
 H24B H 0.198053 0.785000 0.229589 0.023 Uiso 1 1 calc R . . . .
 C25 C 0.48531(13) 0.77802(10) 0.45543(9) 0.0242(4) Uani 1 1 d . . . . .
 H25 H 0.492172 0.809360 0.484125 0.029 Uiso 1 1 calc R . . . .
 C26 C 0.52595(13) 0.72344(10) 0.47340(9) 0.0258(5) Uani 1 1 d . . . . .
 H26 H 0.559900 0.717682 0.514181 0.031 Uiso 1 1 calc R . . . .
 C27 C 0.51758(12) 0.67762(9) 0.43278(9) 0.0224(4) Uani 1 1 d . . . . .
 H27 H 0.546108 0.640471 0.445764 0.027 Uiso 1 1 calc R . . . .
 C28 C 0.46752(11) 0.68475(8) 0.37236(8) 0.0169(4) Uani 1 1 d . . . . .
 C29 C 0.45655(12) 0.63191(8) 0.32969(9) 0.0196(4) Uani 1 1 d . . . . .
 H29 H 0.427914 0.646740 0.287829 0.024 Uiso 1 1 calc R . . . .
 C30 C 0.39610(15) 0.58496(9) 0.34460(10) 0.0286(5) Uani 1 1 d . . . . .
 H30A H 0.423523 0.569170 0.385204 0.043 Uiso 1 1 calc GR . . . .
 H30B H 0.386121 0.552070 0.315375 0.043 Uiso 1 1 calc GR . . . .
 H30C H 0.340117 0.603703 0.342714 0.043 Uiso 1 1 calc GR . . . .
 C31 C 0.54402(14) 0.60282(10) 0.33140(10) 0.0296(5) Uani 1 1 d . . . . .
 H31A H 0.582542 0.633201 0.322569 0.044 Uiso 1 1 calc GR . . . .
 H31B H 0.533622 0.570795 0.301227 0.044 Uiso 1 1 calc GR . . . .
 H31C H 0.571697 0.585914 0.371490 0.044 Uiso 1 1 calc GR . . . .
 C32 C 0.29099(13) 0.84406(9) 0.37224(10) 0.0277(5) Uani 1 1 d . . . . .
 H32A H 0.263176 0.813001 0.342908 0.042 Uiso 1 1 calc GR . . . .
 H32B H 0.263098 0.882849 0.358857 0.042 Uiso 1 1 calc GR . . . .
 H32C H 0.284430 0.833880 0.411555 0.042 Uiso 1 1 calc GR . . . .
 C33 C 0.49923(13) 0.92955(9) 0.13222(9) 0.0258(4) Uani 1 1 d . . . . .
 C34 C 0.55196(13) 0.88733(9) 0.31624(9) 0.0232(4) Uani 1 1 d . . . . .
 H34 H 0.510003 0.912303 0.289228 0.028 Uiso 1 1 calc R . . . .
 C35 C 0.61323(15) 0.91334(11) 0.36551(10) 0.0320(5) Uani 1 1 d . . . . .
 H35 H 0.612329 0.955371 0.372117 0.038 Uiso 1 1 calc R . . . .
 C36 C -0.20601(13) 0.65895(10) 0.37929(10) 0.0277(5) Uani 1 1 d . . . . .
 H36A H -0.214481 0.672920 0.417005 0.042 Uiso 1 1 calc GR . . . .
 H36B H -0.233158 0.619419 0.368963 0.042 Uiso 1 1 calc GR . . . .
 H36C H -0.233075 0.687453 0.346988 0.042 Uiso 1 1 calc GR . . . .
 C37 C -0.10773(13) 0.65436(8) 0.38701(9) 0.0202(4) Uani 1 1 d . . . . .
 H37 H -0.101349 0.641020 0.347596 0.024 Uiso 1 1 calc R . . . .
 C38 C -0.06181(12) 0.71476(8) 0.40231(8) 0.0173(4) Uani 1 1 d . . . . .
 C39 C -0.06897(11) 0.75963(8) 0.35865(8) 0.0137(4) Uani 1 1 d . . . . .
 C40 C -0.11194(11) 0.71518(7) 0.25450(7) 0.0103(3) Uani 1 1 d . . . . .
 B1 B -0.01413(12) 0.69422(9) 0.25296(8) 0.0124(4) Uani 1 1 d . . . . .
 C42 C 0.05622(11) 0.67410(8) 0.31477(8) 0.0140(4) Uani 1 1 d . . . . .
 C43 C 0.11993(12) 0.71357(9) 0.34997(8) 0.0170(4) Uani 1 1 d . . . . .
 H43 H 0.118329 0.754655 0.338795 0.020 Uiso 1 1 calc R . . . .
 C44 C 0.18468(12) 0.69402(9) 0.40033(8) 0.0222(4) Uani 1 1 d . . . . .
 H44 H 0.226293 0.721896 0.423342 0.027 Uiso 1 1 calc R . . . .
 C45 C 0.18987(13) 0.63404(10) 0.41789(9) 0.0268(5) Uani 1 1 d . . . . .
 H45 H 0.235276 0.620631 0.452057 0.032 Uiso 1 1 calc R . . . .
 C46 C 0.02936(13) 0.78293(10) 0.47591(8) 0.0240(4) Uani 1 1 d . . . . .
 H46 H 0.063290 0.790856 0.516293 0.029 Uiso 1 1 calc R . . . .
 C47 C -0.01099(13) 0.72772(9) 0.46121(9) 0.0220(4) Uani 1 1 d . . . . .
 H47 H -0.004029 0.698144 0.491665 0.026 Uiso 1 1 calc R . . . .
 C48 C -0.02908(11) 0.81610(8) 0.37275(8) 0.0161(4) Uani 1 1 d . . . . .
 C49 C -0.04083(12) 0.86612(8) 0.32711(9) 0.0188(4) Uani 1 1 d . . . . .
 H49 H -0.070085 0.848967 0.286309 0.023 Uiso 1 1 calc R . . . .
 C50 C -0.10108(15) 0.91464(9) 0.33970(10) 0.0285(5) Uani 1 1 d . . . . .
 H50A H -0.156879 0.896479 0.339212 0.043 Uiso 1 1 calc GR . . . .
 H50B H -0.111504 0.945789 0.308636 0.043 Uiso 1 1 calc GR . . . .
 H50C H -0.073262 0.932590 0.379288 0.043 Uiso 1 1 calc GR . . . .
 C51 C 0.04603(14) 0.89422(9) 0.32619(10) 0.0283(5) Uani 1 1 d . . . . .
 H51A H 0.075542 0.911884 0.365645 0.042 Uiso 1 1 calc GR . . . .
 H51B H 0.034632 0.925552 0.295259 0.042 Uiso 1 1 calc GR . . . .
 H51C H 0.083374 0.863182 0.317080 0.042 Uiso 1 1 calc GR . . . .
 C52 C 0.02084(12) 0.82648(9) 0.43260(9) 0.0212(4) Uani 1 1 d . . . . .
 H52 H 0.049173 0.864063 0.443438 0.025 Uiso 1 1 calc R . . . .
 C53 C 0.00600(14) 0.61111(11) 0.11106(10) 0.0322(5) Uani 1 1 d . . . . .
 C54 C 0.06215(13) 0.61439(9) 0.33391(9) 0.0223(4) Uani 1 1 d . . . . .
 H54 H 0.020112 0.586361 0.311633 0.027 Uiso 1 1 calc R . . . .
 C55 C 0.12774(14) 0.59454(10) 0.38463(9) 0.0270(4) Uani 1 1 d . . . . .
 H55 H 0.129610 0.553603 0.396322 0.032 Uiso 1 1 calc R . . . .
 C56 C -0.25950(11) 0.74019(8) 0.22430(8) 0.0179(4) Uani 1 1 d . . . . .
 H56A H -0.297799 0.710236 0.235070 0.021 Uiso 1 1 calc R . . . .
 H56B H -0.294847 0.765050 0.190439 0.021 Uiso 1 1 calc R . . . .
 C57 C -0.21263(11) 0.77835(8) 0.27769(8) 0.0167(4) Uani 1 1 d . . . . .
 H57A H -0.208201 0.820575 0.265737 0.020 Uiso 1 1 calc R . . . .
 H57B H -0.242177 0.776985 0.309275 0.020 Uiso 1 1 calc R . . . .
 C58 C -0.20831(10) 0.67558(8) 0.15484(8) 0.0124(3) Uani 1 1 d . . . . .
 C59 C -0.23288(11) 0.61544(8) 0.15803(8) 0.0159(4) Uani 1 1 d . . . . .
 C60 C -0.26392(12) 0.58425(8) 0.10376(9) 0.0208(4) Uani 1 1 d . . . . .
 H60 H -0.279869 0.543237 0.104211 0.025 Uiso 1 1 calc R . . . .
 C61 C -0.27183(12) 0.61218(9) 0.04921(9) 0.0212(4) Uani 1 1 d . . . . .
 H61 H -0.293359 0.590271 0.012722 0.025 Uiso 1 1 calc R . . . .
 C62 C -0.24858(12) 0.67169(9) 0.04762(8) 0.0191(4) Uani 1 1 d . . . . .
 H62 H -0.254776 0.690299 0.009873 0.023 Uiso 1 1 calc R . . . .
 C63 C -0.21617(11) 0.70500(8) 0.10042(8) 0.0146(4) Uani 1 1 d . . . . .
 C64 C -0.19557(12) 0.77130(8) 0.09683(8) 0.0167(4) Uani 1 1 d . . . . .
 H64 H -0.167577 0.786197 0.138750 0.020 Uiso 1 1 calc R . . . .
 C65 C -0.28047(13) 0.80709(9) 0.06965(9) 0.0221(4) Uani 1 1 d . . . . .
 H65A H -0.307821 0.794428 0.027884 0.033 Uiso 1 1 calc GR . . . .
 H65B H -0.266902 0.850028 0.070609 0.033 Uiso 1 1 calc GR . . . .
 H65C H -0.320721 0.799597 0.093150 0.033 Uiso 1 1 calc GR . . . .
 C66 C -0.13183(13) 0.78192(9) 0.06071(9) 0.0215(4) Uani 1 1 d . . . . .
 H66A H -0.075479 0.763263 0.081541 0.032 Uiso 1 1 calc GR . . . .
 H66B H -0.123658 0.825151 0.056857 0.032 Uiso 1 1 calc GR . . . .
 H66C H -0.155463 0.764159 0.020569 0.032 Uiso 1 1 calc GR . . . .
 C67 C -0.23073(12) 0.58556(8) 0.21701(9) 0.0197(4) Uani 1 1 d . . . . .
 H67 H -0.198675 0.612726 0.250613 0.024 Uiso 1 1 calc R . . . .
 C68 C -0.32416(14) 0.57709(9) 0.22074(10) 0.0284(5) Uani 1 1 d . . . . .
 H68A H -0.353593 0.616107 0.216456 0.043 Uiso 1 1 calc GR . . . .
 H68B H -0.321545 0.559480 0.259777 0.043 Uiso 1 1 calc GR . . . .
 H68C H -0.356798 0.550308 0.188354 0.043 Uiso 1 1 calc GR . . . .
 C69 C -0.18317(14) 0.52491(9) 0.22613(10) 0.0271(4) Uani 1 1 d . . . . .
 H69A H -0.215593 0.496633 0.195180 0.041 Uiso 1 1 calc GR . . . .
 H69B H -0.179420 0.509064 0.266068 0.041 Uiso 1 1 calc GR . . . .
 H69C H -0.124141 0.530299 0.222980 0.041 Uiso 1 1 calc GR . . . .
 C70 C -0.06820(15) 0.60523(10) 0.43348(10) 0.0318(5) Uani 1 1 d . . . . .
 H70A H -0.004701 0.604117 0.441300 0.048 Uiso 1 1 calc GR . . . .
 H70B H -0.093277 0.566269 0.417777 0.048 Uiso 1 1 calc GR . . . .
 H70C H -0.081381 0.613945 0.471019 0.048 Uiso 1 1 calc GR . . . .
 C71 C 0.48981(17) 0.56673(12) 0.06161(14) 0.0484(7) Uani 1 1 d . . . . .
 H71A H 0.530194 0.532644 0.068266 0.073 Uiso 1 1 calc GR . . . .
 H71B H 0.520769 0.602093 0.082648 0.073 Uiso 1 1 calc GR . . . .
 H71C H 0.467135 0.575193 0.018385 0.073 Uiso 1 1 calc GR . . . .
 C72 C 0.41491(15) 0.55175(10) 0.08552(11) 0.0329(5) Uani 1 1 d . . . . .
 C73 C 0.34104(16) 0.52376(9) 0.04987(11) 0.0336(5) Uani 1 1 d . . . . .
 H73 H 0.337750 0.513977 0.009568 0.040 Uiso 1 1 calc R . . . .
 C74 C 0.27176(16) 0.50940(10) 0.07026(11) 0.0361(5) Uani 1 1 d . . . . .
 H74 H 0.222490 0.489018 0.044606 0.043 Uiso 1 1 calc R . . . .
 C75 C 0.27387(16) 0.52470(10) 0.12837(11) 0.0364(5) Uani 1 1 d . . . . .
 H75 H 0.225993 0.515279 0.142707 0.044 Uiso 1 1 calc R . . . .
 C76 C 0.41738(17) 0.56708(11) 0.14343(11) 0.0383(6) Uani 1 1 d . . . . .
 H76 H 0.467430 0.586787 0.168977 0.046 Uiso 1 1 calc R . . . .
 C77 C 0.34639(17) 0.55378(11) 0.16506(10) 0.0380(6) Uani 1 1 d . . . . .
 H77 H 0.348518 0.564846 0.204849 0.046 Uiso 1 1 calc R . . . .
 C78 C 0.98302(17) 0.93066(12) 0.05392(13) 0.0443(6) Uani 1 1 d . . . . .
 H78A H 1.023573 0.964633 0.060263 0.066 Uiso 1 1 calc GR . . . .
 H78B H 0.959865 0.922077 0.010739 0.066 Uiso 1 1 calc GR . . . .
 H78C H 1.013945 0.895287 0.074951 0.066 Uiso 1 1 calc GR . . . .
 C79 C 0.90854(15) 0.94605(9) 0.07828(10) 0.0300(5) Uani 1 1 d . . . . .
 C80 C 0.83499(16) 0.97493(10) 0.04253(11) 0.0343(5) Uani 1 1 d . . . . .
 H80 H 0.831573 0.985121 0.002296 0.041 Uiso 1 1 calc R . . . .
 C81 C 0.76640(16) 0.98928(10) 0.06400(11) 0.0370(5) Uani 1 1 d . . . . .
 H81 H 0.717098 1.010029 0.038827 0.044 Uiso 1 1 calc R . . . .
 C82 C 0.76885(16) 0.97370(11) 0.12187(11) 0.0364(5) Uani 1 1 d . . . . .
 H82 H 0.721331 0.983238 0.136543 0.044 Uiso 1 1 calc R . . . .
 C83 C 0.91105(15) 0.93053(11) 0.13615(10) 0.0344(5) Uani 1 1 d . . . . .
 H83 H 0.960933 0.910370 0.161341 0.041 Uiso 1 1 calc R . . . .
 C84 C 0.84166(16) 0.94393(11) 0.15825(11) 0.0373(5) Uani 1 1 d . . . . .
 H84 H 0.844240 0.932710 0.198079 0.045 Uiso 1 1 calc R . . . .
 S4 S 0.5407(5) 0.8936(3) 0.1919(3) 0.024(3) Uani 0.067(2) 1 d . . P A 4
 S2 S 0.0377(3) 0.64443(18) 0.16306(18) 0.0205(14) Uani 0.119(2) 1 d . . P B 2

loop_
  _atom_site_aniso_label
  _atom_site_aniso_U_11
  _atom_site_aniso_U_22
  _atom_site_aniso_U_33
  _atom_site_aniso_U_23
  _atom_site_aniso_U_13
  _atom_site_aniso_U_12
 Cl1 0.0131(2) 0.0155(2) 0.0215(2) -0.00024(16) 0.00755(17) 0.00265(15)
 Cl2 0.0121(2) 0.0210(2) 0.0202(2) 0.00598(17) 0.00601(17) -0.00116(16)
 S3 0.0156(3) 0.0142(3) 0.0155(3) 0.00129(19) 0.00840(19) -0.00081(17)
 S1 0.0116(3) 0.0143(3) 0.0135(3) -0.0010(2) 0.00390(19) 0.00288(18)
 O1 0.0128(6) 0.0192(6) 0.0160(6) 0.0055(5) 0.0061(5) 0.0022(5)
 F2 0.0436(8) 0.0191(6) 0.0443(8) -0.0053(5) 0.0151(6) -0.0015(5)
 F3 0.0223(6) 0.0445(8) 0.0345(7) 0.0176(6) -0.0014(5) -0.0018(5)
 F4 0.0369(7) 0.0433(8) 0.0509(8) 0.0239(7) 0.0234(6) -0.0023(6)
 F5 0.0360(7) 0.0663(10) 0.0313(7) -0.0162(7) 0.0147(6) 0.0154(7)
 F6 0.0225(7) 0.1056(14) 0.0290(7) -0.0286(8) -0.0024(6) 0.0091(7)
 F7 0.0842(12) 0.0477(9) 0.0404(8) 0.0256(7) 0.0383(8) 0.0319(8)
 O0AA 0.0141(6) 0.0289(8) 0.0317(8) 0.0084(6) 0.0088(6) 0.0010(5)
 O2 0.0446(9) 0.0283(8) 0.0266(8) -0.0092(6) 0.0227(7) -0.0109(7)
 O3 0.0120(6) 0.0222(7) 0.0172(6) -0.0081(5) 0.0027(5) 0.0021(5)
 O4 0.0347(8) 0.0189(7) 0.0491(9) 0.0079(7) 0.0246(7) 0.0087(6)
 O5 0.0124(6) 0.0322(8) 0.0296(8) -0.0093(6) 0.0064(6) 0.0000(6)
 N1 0.0102(7) 0.0134(7) 0.0122(7) 0.0019(6) 0.0044(6) -0.0022(5)
 N2 0.0091(7) 0.0141(7) 0.0128(7) 0.0038(6) 0.0041(6) -0.0007(5)
 N3 0.0106(7) 0.0137(7) 0.0124(7) -0.0027(6) 0.0044(6) 0.0007(6)
 N4 0.0086(7) 0.0134(7) 0.0124(7) -0.0038(6) 0.0039(6) 0.0005(5)
 C1 0.0343(12) 0.0265(11) 0.0314(11) -0.0102(9) 0.0100(9) -0.0012(9)
 C2 0.0243(10) 0.0204(10) 0.0177(9) -0.0027(7) 0.0101(8) -0.0013(8)
 C3 0.0180(9) 0.0234(10) 0.0143(9) 0.0000(7) 0.0081(7) -0.0040(7)
 C4 0.0131(8) 0.0201(9) 0.0102(8) 0.0026(7) 0.0044(7) -0.0036(7)
 C5 0.0122(8) 0.0091(8) 0.0104(8) -0.0009(6) 0.0048(6) 0.0022(6)
 B2 0.0104(9) 0.0134(9) 0.0126(9) 0.0018(7) 0.0052(7) 0.0013(7)
 C7 0.0117(8) 0.0204(9) 0.0135(8) 0.0007(7) 0.0026(7) -0.0044(7)
 C8 0.0162(9) 0.0317(11) 0.0163(9) 0.0015(8) 0.0075(7) -0.0002(8)
 C9 0.0183(10) 0.0518(14) 0.0144(9) 0.0024(9) 0.0025(8) -0.0017(9)
 C10 0.0318(12) 0.0540(15) 0.0194(10) -0.0110(10) 0.0076(9) -0.0192(11)
 C11 0.0300(11) 0.0273(11) 0.0370(12) -0.0126(9) 0.0156(9) -0.0076(9)
 C12 0.0204(9) 0.0172(9) 0.0216(9) -0.0001(7) 0.0076(8) 0.0038(7)
 C13 0.0268(11) 0.0230(10) 0.0396(12) -0.0012(9) 0.0185(9) 0.0003(8)
 C14 0.0110(8) 0.0153(9) 0.0196(9) 0.0021(7) 0.0034(7) 0.0005(7)
 C15 0.0180(9) 0.0144(9) 0.0243(10) 0.0040(7) 0.0021(8) 0.0026(7)
 C16 0.0205(9) 0.0197(9) 0.0174(9) 0.0081(7) -0.0010(7) -0.0013(7)
 C17 0.0214(9) 0.0191(9) 0.0141(9) 0.0021(7) 0.0016(7) -0.0022(7)
 C18 0.0112(8) 0.0154(9) 0.0161(9) 0.0028(7) 0.0021(7) -0.0011(7)
 C19 0.0186(9) 0.0156(9) 0.0155(9) 0.0017(7) 0.0029(7) 0.0008(7)
 C20 0.0244(10) 0.0214(10) 0.0225(10) -0.0019(8) 0.0073(8) 0.0004(8)
 C21 0.0267(10) 0.0172(9) 0.0255(10) -0.0017(8) 0.0066(8) -0.0050(8)
 C22 0.0086(8) 0.0160(9) 0.0134(8) 0.0046(7) 0.0020(6) -0.0007(6)
 C23 0.0124(8) 0.0202(9) 0.0182(9) 0.0025(7) 0.0053(7) -0.0052(7)
 C24 0.0111(8) 0.0239(10) 0.0215(9) 0.0065(8) 0.0053(7) -0.0041(7)
 C25 0.0228(10) 0.0344(11) 0.0160(9) -0.0052(8) 0.0070(8) -0.0065(8)
 C26 0.0224(10) 0.0395(12) 0.0138(9) 0.0063(8) 0.0030(8) -0.0024(9)
 C27 0.0196(9) 0.0283(11) 0.0185(9) 0.0088(8) 0.0048(8) -0.0004(8)
 C28 0.0147(8) 0.0211(9) 0.0158(9) 0.0066(7) 0.0060(7) -0.0025(7)
 C29 0.0215(10) 0.0180(9) 0.0201(9) 0.0066(7) 0.0075(8) 0.0034(7)
 C30 0.0373(12) 0.0202(10) 0.0292(11) 0.0053(8) 0.0116(9) -0.0041(9)
 C31 0.0317(11) 0.0268(11) 0.0317(11) 0.0089(9) 0.0115(9) 0.0137(9)
 C32 0.0249(11) 0.0241(10) 0.0359(12) -0.0020(9) 0.0120(9) 0.0021(8)
 C33 0.0208(10) 0.0257(10) 0.0309(11) 0.0052(9) 0.0075(8) -0.0032(8)
 C34 0.0242(10) 0.0248(10) 0.0223(10) -0.0028(8) 0.0099(8) -0.0055(8)
 C35 0.0358(12) 0.0358(12) 0.0274(11) -0.0121(9) 0.0140(10) -0.0184(10)
 C36 0.0256(11) 0.0264(11) 0.0341(11) 0.0005(9) 0.0135(9) -0.0048(8)
 C37 0.0257(10) 0.0178(9) 0.0201(9) 0.0015(7) 0.0115(8) -0.0008(8)
 C38 0.0183(9) 0.0212(9) 0.0143(9) -0.0018(7) 0.0080(7) 0.0026(7)
 C39 0.0138(8) 0.0168(9) 0.0117(8) -0.0036(7) 0.0055(7) 0.0020(7)
 C40 0.0129(8) 0.0084(8) 0.0107(8) 0.0007(6) 0.0055(6) -0.0021(6)
 B1 0.0112(9) 0.0140(9) 0.0127(9) -0.0032(7) 0.0048(7) -0.0019(7)
 C42 0.0122(8) 0.0176(9) 0.0125(8) -0.0019(7) 0.0042(7) 0.0020(7)
 C43 0.0172(9) 0.0204(9) 0.0151(9) -0.0015(7) 0.0075(7) 0.0001(7)
 C44 0.0176(9) 0.0326(11) 0.0154(9) -0.0041(8) 0.0036(7) -0.0026(8)
 C45 0.0242(10) 0.0373(12) 0.0164(9) 0.0052(8) 0.0024(8) 0.0071(9)
 C46 0.0223(10) 0.0345(11) 0.0135(9) -0.0071(8) 0.0029(8) 0.0015(8)
 C47 0.0216(10) 0.0297(11) 0.0156(9) 0.0018(8) 0.0069(8) 0.0047(8)
 C48 0.0141(8) 0.0185(9) 0.0166(9) -0.0060(7) 0.0059(7) 0.0018(7)
 C49 0.0201(9) 0.0155(9) 0.0215(9) -0.0053(7) 0.0071(8) -0.0030(7)
 C50 0.0357(12) 0.0173(10) 0.0333(11) -0.0046(8) 0.0114(9) 0.0039(9)
 C51 0.0292(11) 0.0232(10) 0.0341(12) -0.0056(9) 0.0120(9) -0.0105(8)
 C52 0.0181(9) 0.0236(10) 0.0205(9) -0.0103(8) 0.0039(8) -0.0012(8)
 C53 0.0294(11) 0.0443(13) 0.0234(11) -0.0041(9) 0.0087(9) 0.0119(10)
 C54 0.0215(10) 0.0210(10) 0.0242(10) 0.0009(8) 0.0067(8) 0.0007(8)
 C55 0.0299(11) 0.0245(10) 0.0270(11) 0.0095(8) 0.0094(9) 0.0083(9)
 C56 0.0104(8) 0.0222(9) 0.0215(9) -0.0061(8) 0.0056(7) 0.0032(7)
 C57 0.0125(8) 0.0182(9) 0.0196(9) -0.0033(7) 0.0053(7) 0.0038(7)
 C58 0.0082(8) 0.0131(8) 0.0148(8) -0.0054(7) 0.0016(6) 0.0004(6)
 C59 0.0105(8) 0.0161(9) 0.0208(9) -0.0033(7) 0.0044(7) -0.0004(7)
 C60 0.0182(9) 0.0144(9) 0.0274(10) -0.0066(8) 0.0033(8) -0.0030(7)
 C61 0.0191(9) 0.0218(10) 0.0183(9) -0.0090(8) -0.0009(7) 0.0007(7)
 C62 0.0188(9) 0.0200(9) 0.0156(9) -0.0042(7) 0.0005(7) 0.0033(7)
 C63 0.0100(8) 0.0160(9) 0.0159(9) -0.0028(7) 0.0012(7) 0.0029(7)
 C64 0.0178(9) 0.0152(9) 0.0151(9) -0.0018(7) 0.0021(7) 0.0001(7)
 C65 0.0236(10) 0.0179(9) 0.0226(10) 0.0015(8) 0.0039(8) 0.0063(8)
 C66 0.0230(10) 0.0206(10) 0.0207(9) 0.0017(8) 0.0064(8) 0.0008(8)
 C67 0.0208(9) 0.0152(9) 0.0244(10) -0.0018(7) 0.0090(8) -0.0039(7)
 C68 0.0280(11) 0.0219(10) 0.0428(12) 0.0007(9) 0.0220(10) -0.0011(8)
 C69 0.0262(10) 0.0232(10) 0.0353(11) 0.0081(9) 0.0142(9) 0.0043(8)
 C70 0.0378(12) 0.0253(11) 0.0324(12) 0.0094(9) 0.0111(10) -0.0001(9)
 C71 0.0418(14) 0.0380(14) 0.0735(19) 0.0216(13) 0.0298(14) 0.0103(11)
 C72 0.0383(12) 0.0218(11) 0.0393(13) 0.0082(9) 0.0130(10) 0.0059(9)
 C73 0.0467(14) 0.0176(10) 0.0356(12) 0.0020(9) 0.0111(10) 0.0003(9)
 C74 0.0407(13) 0.0228(11) 0.0409(13) -0.0024(9) 0.0068(11) -0.0056(10)
 C75 0.0401(13) 0.0273(11) 0.0442(14) 0.0079(10) 0.0164(11) 0.0009(10)
 C76 0.0447(14) 0.0279(12) 0.0345(12) 0.0050(10) 0.0004(11) 0.0000(10)
 C77 0.0550(15) 0.0306(12) 0.0268(11) 0.0025(9) 0.0101(11) 0.0034(11)
 C78 0.0434(14) 0.0414(14) 0.0550(16) -0.0130(12) 0.0254(13) -0.0070(11)
 C79 0.0354(12) 0.0210(10) 0.0348(12) -0.0079(9) 0.0123(10) -0.0065(9)
 C80 0.0490(14) 0.0195(10) 0.0343(12) -0.0017(9) 0.0123(11) -0.0018(10)
 C81 0.0368(13) 0.0263(12) 0.0433(14) -0.0014(10) 0.0051(11) 0.0047(10)
 C82 0.0342(12) 0.0317(12) 0.0461(14) -0.0118(10) 0.0164(11) -0.0022(10)
 C83 0.0343(12) 0.0325(12) 0.0306(12) -0.0049(9) 0.0012(9) 0.0012(10)
 C84 0.0453(14) 0.0382(13) 0.0273(11) -0.0057(10) 0.0093(10) -0.0031(11)
 S4 0.029(4) 0.016(4) 0.029(4) -0.005(3) 0.013(3) -0.007(3)
 S2 0.023(2) 0.022(2) 0.020(2) 0.0014(17) 0.0122(17) 0.0007(16)

_geom_special_details
;
 All esds (except the esd in the dihedral angle between two l.s. planes)
 are estimated using the full covariance matrix.  The cell esds are taken
 into account individually in the estimation of esds in distances, angles
 and torsion angles; correlations between esds in cell parameters are only
 used when they are defined by crystal symmetry.  An approximate (isotropic)
 treatment of cell esds is used for estimating esds involving l.s. planes.
;
loop_
  _geom_bond_atom_site_label_1
  _geom_bond_atom_site_label_2
  _geom_bond_distance
  _geom_bond_site_symmetry_2
  _geom_bond_publ_flag
 Cl1 B2 1.8948(19) . ?
 Cl2 B1 1.887(2) . ?
 S3 O1 1.5265(12) . ?
 S3 O0AA 1.4329(14) . ?
 S3 O2 1.4228(15) . ?
 S3 C33 1.828(2) . ?
 S1 O3 1.5270(13) . ?
 S1 O4 1.4345(15) . ?
 S1 O5 1.4284(14) . ?
 S1 C53 1.820(2) . ?
 O1 B2 1.532(2) . ?
 O1 S4 1.642(7) . ?
 F2 C33 1.333(2) . ?
 F2 S4 1.722(7) . ?
 F3 C33 1.319(2) . ?
 F4 C33 1.328(2) . ?
 F5 C53 1.332(2) . ?
 F6 C53 1.341(3) . ?
 F7 C53 1.340(3) . ?
 F7 S2 1.586(4) . ?
 O0AA S4 1.459(8) . ?
 O3 B1 1.531(2) . ?
 O3 S2 1.687(4) . ?
 O5 S2 1.559(4) . ?
 N1 C4 1.443(2) . ?
 N1 C5 1.341(2) . ?
 N1 C23 1.485(2) . ?
 N2 C5 1.330(2) . ?
 N2 C22 1.446(2) . ?
 N2 C24 1.482(2) . ?
 N3 C39 1.443(2) . ?
 N3 C40 1.339(2) . ?
 N3 C57 1.486(2) . ?
 N4 C40 1.329(2) . ?
 N4 C56 1.480(2) . ?
 N4 C58 1.445(2) . ?
 C1 H1A 0.9800 . ?
 C1 H1B 0.9800 . ?
 C1 H1C 0.9800 . ?
 C1 C2 1.533(3) . ?
 C2 H2 1.0000 . ?
 C2 C3 1.525(3) . ?
 C2 C32 1.531(3) . ?
 C3 C4 1.408(3) . ?
 C3 C25 1.394(3) . ?
 C4 C28 1.402(3) . ?
 C5 B2 1.648(2) . ?
 B2 C7 1.598(2) . ?
 C7 C8 1.407(3) . ?
 C7 C34 1.398(3) . ?
 C8 H8 0.9500 . ?
 C8 C9 1.377(3) . ?
 C9 H9 0.9500 . ?
 C9 C10 1.398(4) . ?
 C10 H10 0.9500 . ?
 C10 C35 1.388(4) . ?
 C11 H11A 0.9800 . ?
 C11 H11B 0.9800 . ?
 C11 H11C 0.9800 . ?
 C11 C12 1.534(3) . ?
 C12 H12 1.0000 . ?
 C12 C13 1.543(3) . ?
 C12 C14 1.520(3) . ?
 C13 H13A 0.9800 . ?
 C13 H13B 0.9800 . ?
 C13 H13C 0.9800 . ?
 C14 C15 1.393(3) . ?
 C14 C22 1.402(3) . ?
 C15 H15 0.9500 . ?
 C15 C16 1.385(3) . ?
 C16 H16 0.9500 . ?
 C16 C17 1.382(3) . ?
 C17 H17 0.9500 . ?
 C17 C18 1.396(2) . ?
 C18 C19 1.519(2) . ?
 C18 C22 1.401(3) . ?
 C19 H19 1.0000 . ?
 C19 C20 1.528(3) . ?
 C19 C21 1.537(3) . ?
 C20 H20A 0.9800 . ?
 C20 H20B 0.9800 . ?
 C20 H20C 0.9800 . ?
 C21 H21A 0.9800 . ?
 C21 H21B 0.9800 . ?
 C21 H21C 0.9800 . ?
 C23 H23A 0.9900 . ?
 C23 H23B 0.9900 . ?
 C23 C24 1.505(2) . ?
 C24 H24A 0.9900 . ?
 C24 H24B 0.9900 . ?
 C25 H25 0.9500 . ?
 C25 C26 1.384(3) . ?
 C26 H26 0.9500 . ?
 C26 C27 1.371(3) . ?
 C27 H27 0.9500 . ?
 C27 C28 1.403(3) . ?
 C28 C29 1.517(3) . ?
 C29 H29 1.0000 . ?
 C29 C30 1.537(3) . ?
 C29 C31 1.536(3) . ?
 C30 H30A 0.9800 . ?
 C30 H30B 0.9800 . ?
 C30 H30C 0.9800 . ?
 C31 H31A 0.9800 . ?
 C31 H31B 0.9800 . ?
 C31 H31C 0.9800 . ?
 C32 H32A 0.9800 . ?
 C32 H32B 0.9800 . ?
 C32 H32C 0.9800 . ?
 C33 S4 1.567(8) . ?
 C34 H34 0.9500 . ?
 C34 C35 1.391(3) . ?
 C35 H35 0.9500 . ?
 C36 H36A 0.9800 . ?
 C36 H36B 0.9800 . ?
 C36 H36C 0.9800 . ?
 C36 C37 1.536(3) . ?
 C37 H37 1.0000 . ?
 C37 C38 1.524(3) . ?
 C37 C70 1.535(3) . ?
 C38 C39 1.406(3) . ?
 C38 C47 1.398(3) . ?
 C39 C48 1.405(3) . ?
 C40 B1 1.649(2) . ?
 B1 C42 1.601(2) . ?
 C42 C43 1.408(3) . ?
 C42 C54 1.398(3) . ?
 C43 H43 0.9500 . ?
 C43 C44 1.381(3) . ?
 C44 H44 0.9500 . ?
 C44 C45 1.393(3) . ?
 C45 H45 0.9500 . ?
 C45 C55 1.379(3) . ?
 C46 H46 0.9500 . ?
 C46 C47 1.384(3) . ?
 C46 C52 1.377(3) . ?
 C47 H47 0.9500 . ?
 C48 C49 1.513(3) . ?
 C48 C52 1.401(3) . ?
 C49 H49 1.0000 . ?
 C49 C50 1.537(3) . ?
 C49 C51 1.535(3) . ?
 C50 H50A 0.9800 . ?
 C50 H50B 0.9800 . ?
 C50 H50C 0.9800 . ?
 C51 H51A 0.9800 . ?
 C51 H51B 0.9800 . ?
 C51 H51C 0.9800 . ?
 C52 H52 0.9500 . ?
 C53 S2 1.380(5) . ?
 C54 H54 0.9500 . ?
 C54 C55 1.395(3) . ?
 C55 H55 0.9500 . ?
 C56 H56A 0.9900 . ?
 C56 H56B 0.9900 . ?
 C56 C57 1.506(2) . ?
 C57 H57A 0.9900 . ?
 C57 H57B 0.9900 . ?
 C58 C59 1.405(3) . ?
 C58 C63 1.399(3) . ?
 C59 C60 1.396(3) . ?
 C59 C67 1.518(3) . ?
 C60 H60 0.9500 . ?
 C60 C61 1.386(3) . ?
 C61 H61 0.9500 . ?
 C61 C62 1.381(3) . ?
 C62 H62 0.9500 . ?
 C62 C63 1.395(3) . ?
 C63 C64 1.522(2) . ?
 C64 H64 1.0000 . ?
 C64 C65 1.540(2) . ?
 C64 C66 1.528(3) . ?
 C65 H65A 0.9800 . ?
 C65 H65B 0.9800 . ?
 C65 H65C 0.9800 . ?
 C66 H66A 0.9800 . ?
 C66 H66B 0.9800 . ?
 C66 H66C 0.9800 . ?
 C67 H67 1.0000 . ?
 C67 C68 1.540(3) . ?
 C67 C69 1.535(3) . ?
 C68 H68A 0.9800 . ?
 C68 H68B 0.9800 . ?
 C68 H68C 0.9800 . ?
 C69 H69A 0.9800 . ?
 C69 H69B 0.9800 . ?
 C69 H69C 0.9800 . ?
 C70 H70A 0.9800 . ?
 C70 H70B 0.9800 . ?
 C70 H70C 0.9800 . ?
 C71 H71A 0.9800 . ?
 C71 H71B 0.9800 . ?
 C71 H71C 0.9800 . ?
 C71 C72 1.508(3) . ?
 C72 C73 1.374(3) . ?
 C72 C76 1.381(4) . ?
 C73 H73 0.9500 . ?
 C73 C74 1.373(3) . ?
 C74 H74 0.9500 . ?
 C74 C75 1.387(3) . ?
 C75 H75 0.9500 . ?
 C75 C77 1.379(4) . ?
 C76 H76 0.9500 . ?
 C76 C77 1.411(4) . ?
 C77 H77 0.9500 . ?
 C78 H78A 0.9800 . ?
 C78 H78B 0.9800 . ?
 C78 H78C 0.9800 . ?
 C78 C79 1.511(3) . ?
 C79 C80 1.380(3) . ?
 C79 C83 1.381(3) . ?
 C80 H80 0.9500 . ?
 C80 C81 1.378(4) . ?
 C81 H81 0.9500 . ?
 C81 C82 1.382(4) . ?
 C82 H82 0.9500 . ?
 C82 C84 1.387(4) . ?
 C83 H83 0.9500 . ?
 C83 C84 1.394(3) . ?
 C84 H84 0.9500 . ?

loop_
  _geom_angle_atom_site_label_1
  _geom_angle_atom_site_label_2
  _geom_angle_atom_site_label_3
  _geom_angle
  _geom_angle_site_symmetry_1
  _geom_angle_site_symmetry_3
  _geom_angle_publ_flag
 O1 S3 C33 98.36(8) . . ?
 O0AA S3 O1 112.23(8) . . ?
 O0AA S3 C33 105.90(9) . . ?
 O2 S3 O1 112.94(8) . . ?
 O2 S3 O0AA 120.32(9) . . ?
 O2 S3 C33 103.91(10) . . ?
 O3 S1 C53 99.63(8) . . ?
 O4 S1 O3 111.40(8) . . ?
 O4 S1 C53 102.34(11) . . ?
 O5 S1 O3 112.93(8) . . ?
 O5 S1 O4 122.40(9) . . ?
 O5 S1 C53 104.51(10) . . ?
 S3 O1 B2 124.51(11) . . ?
 B2 O1 S4 121.7(3) . . ?
 C33 F2 S4 60.2(3) . . ?
 C53 F7 S2 55.52(18) . . ?
 S1 O3 B1 127.84(11) . . ?
 B1 O3 S2 115.00(18) . . ?
 C4 N1 C23 119.76(14) . . ?
 C5 N1 C4 129.39(14) . . ?
 C5 N1 C23 110.84(14) . . ?
 C5 N2 C22 130.77(14) . . ?
 C5 N2 C24 111.49(14) . . ?
 C22 N2 C24 116.48(13) . . ?
 C39 N3 C57 119.69(14) . . ?
 C40 N3 C39 129.48(14) . . ?
 C40 N3 C57 110.82(14) . . ?
 C40 N4 C56 111.61(14) . . ?
 C40 N4 C58 131.16(14) . . ?
 C58 N4 C56 116.33(13) . . ?
 H1A C1 H1B 109.5 . . ?
 H1A C1 H1C 109.5 . . ?
 H1B C1 H1C 109.5 . . ?
 C2 C1 H1A 109.5 . . ?
 C2 C1 H1B 109.5 . . ?
 C2 C1 H1C 109.5 . . ?
 C1 C2 H2 107.4 . . ?
 C1 C2 C32 108.78(16) . . ?
 C3 C2 C1 113.78(16) . . ?
 C3 C2 H2 107.4 . . ?
 C3 C2 C32 111.83(16) . . ?
 C32 C2 H2 107.4 . . ?
 C4 C3 C2 122.22(16) . . ?
 C25 C3 C2 120.51(17) . . ?
 C25 C3 C4 117.27(18) . . ?
 C3 C4 N1 118.60(16) . . ?
 C28 C4 N1 118.93(16) . . ?
 C28 C4 C3 122.27(16) . . ?
 N1 C5 B2 123.00(14) . . ?
 N2 C5 N1 109.30(14) . . ?
 N2 C5 B2 126.57(14) . . ?
 O1 B2 Cl1 107.61(11) . . ?
 O1 B2 C5 106.51(13) . . ?
 O1 B2 C7 110.48(14) . . ?
 C5 B2 Cl1 100.54(11) . . ?
 C7 B2 Cl1 112.28(12) . . ?
 C7 B2 C5 118.55(14) . . ?
 C8 C7 B2 122.80(17) . . ?
 C8 C7 C34 117.12(17) . . ?
 C34 C7 B2 119.92(16) . . ?
 C7 C8 H8 119.4 . . ?
 C9 C8 C7 121.3(2) . . ?
 C9 C8 H8 119.4 . . ?
 C8 C9 H9 119.7 . . ?
 C8 C9 C10 120.6(2) . . ?
 C10 C9 H9 119.7 . . ?
 C9 C10 H10 120.4 . . ?
 C35 C10 C9 119.28(19) . . ?
 C35 C10 H10 120.4 . . ?
 H11A C11 H11B 109.5 . . ?
 H11A C11 H11C 109.5 . . ?
 H11B C11 H11C 109.5 . . ?
 C12 C11 H11A 109.5 . . ?
 C12 C11 H11B 109.5 . . ?
 C12 C11 H11C 109.5 . . ?
 C11 C12 H12 108.0 . . ?
 C11 C12 C13 109.75(16) . . ?
 C13 C12 H12 108.0 . . ?
 C14 C12 C11 112.37(16) . . ?
 C14 C12 H12 108.0 . . ?
 C14 C12 C13 110.71(16) . . ?
 C12 C13 H13A 109.5 . . ?
 C12 C13 H13B 109.5 . . ?
 C12 C13 H13C 109.5 . . ?
 H13A C13 H13B 109.5 . . ?
 H13A C13 H13C 109.5 . . ?
 H13B C13 H13C 109.5 . . ?
 C15 C14 C12 119.72(16) . . ?
 C15 C14 C22 117.58(17) . . ?
 C22 C14 C12 122.66(16) . . ?
 C14 C15 H15 119.6 . . ?
 C16 C15 C14 120.88(17) . . ?
 C16 C15 H15 119.6 . . ?
 C15 C16 H16 119.8 . . ?
 C17 C16 C15 120.31(17) . . ?
 C17 C16 H16 119.8 . . ?
 C16 C17 H17 119.3 . . ?
 C16 C17 C18 121.30(17) . . ?
 C18 C17 H17 119.3 . . ?
 C17 C18 C19 120.01(16) . . ?
 C17 C18 C22 117.11(16) . . ?
 C22 C18 C19 122.81(16) . . ?
 C18 C19 H19 108.0 . . ?
 C18 C19 C20 111.89(15) . . ?
 C18 C19 C21 110.17(15) . . ?
 C20 C19 H19 108.0 . . ?
 C20 C19 C21 110.62(15) . . ?
 C21 C19 H19 108.0 . . ?
 C19 C20 H20A 109.5 . . ?
 C19 C20 H20B 109.5 . . ?
 C19 C20 H20C 109.5 . . ?
 H20A C20 H20B 109.5 . . ?
 H20A C20 H20C 109.5 . . ?
 H20B C20 H20C 109.5 . . ?
 C19 C21 H21A 109.5 . . ?
 C19 C21 H21B 109.5 . . ?
 C19 C21 H21C 109.5 . . ?
 H21A C21 H21B 109.5 . . ?
 H21A C21 H21C 109.5 . . ?
 H21B C21 H21C 109.5 . . ?
 C14 C22 N2 118.37(15) . . ?
 C18 C22 N2 118.28(15) . . ?
 C18 C22 C14 122.77(16) . . ?
 N1 C23 H23A 111.4 . . ?
 N1 C23 H23B 111.4 . . ?
 N1 C23 C24 101.83(14) . . ?
 H23A C23 H23B 109.3 . . ?
 C24 C23 H23A 111.4 . . ?
 C24 C23 H23B 111.4 . . ?
 N2 C24 C23 102.16(14) . . ?
 N2 C24 H24A 111.3 . . ?
 N2 C24 H24B 111.3 . . ?
 C23 C24 H24A 111.3 . . ?
 C23 C24 H24B 111.3 . . ?
 H24A C24 H24B 109.2 . . ?
 C3 C25 H25 119.3 . . ?
 C26 C25 C3 121.34(19) . . ?
 C26 C25 H25 119.3 . . ?
 C25 C26 H26 119.8 . . ?
 C27 C26 C25 120.48(18) . . ?
 C27 C26 H26 119.8 . . ?
 C26 C27 H27 119.5 . . ?
 C26 C27 C28 121.00(19) . . ?
 C28 C27 H27 119.5 . . ?
 C4 C28 C29 123.16(16) . . ?
 C27 C28 C4 117.62(18) . . ?
 C27 C28 C29 119.18(17) . . ?
 C28 C29 H29 108.1 . . ?
 C28 C29 C30 109.63(16) . . ?
 C28 C29 C31 112.78(16) . . ?
 C30 C29 H29 108.1 . . ?
 C30 C29 C31 110.00(17) . . ?
 C31 C29 H29 108.1 . . ?
 C29 C30 H30A 109.5 . . ?
 C29 C30 H30B 109.5 . . ?
 C29 C30 H30C 109.5 . . ?
 H30A C30 H30B 109.5 . . ?
 H30A C30 H30C 109.5 . . ?
 H30B C30 H30C 109.5 . . ?
 C29 C31 H31A 109.5 . . ?
 C29 C31 H31B 109.5 . . ?
 C29 C31 H31C 109.5 . . ?
 H31A C31 H31B 109.5 . . ?
 H31A C31 H31C 109.5 . . ?
 H31B C31 H31C 109.5 . . ?
 C2 C32 H32A 109.5 . . ?
 C2 C32 H32B 109.5 . . ?
 C2 C32 H32C 109.5 . . ?
 H32A C32 H32B 109.5 . . ?
 H32A C32 H32C 109.5 . . ?
 H32B C32 H32C 109.5 . . ?
 F2 C33 S3 110.67(14) . . ?
 F2 C33 F4 109.62(17) . . ?
 F2 C33 S4 72.3(3) . . ?
 F3 C33 S3 111.19(14) . . ?
 F3 C33 F2 109.22(17) . . ?
 F3 C33 F4 108.35(17) . . ?
 F3 C33 S4 129.6(3) . . ?
 F4 C33 S3 107.74(14) . . ?
 F4 C33 S4 118.6(3) . . ?
 C7 C34 H34 119.0 . . ?
 C35 C34 C7 122.1(2) . . ?
 C35 C34 H34 119.0 . . ?
 C10 C35 C34 119.6(2) . . ?
 C10 C35 H35 120.2 . . ?
 C34 C35 H35 120.2 . . ?
 H36A C36 H36B 109.5 . . ?
 H36A C36 H36C 109.5 . . ?
 H36B C36 H36C 109.5 . . ?
 C37 C36 H36A 109.5 . . ?
 C37 C36 H36B 109.5 . . ?
 C37 C36 H36C 109.5 . . ?
 C36 C37 H37 107.5 . . ?
 C38 C37 C36 112.05(16) . . ?
 C38 C37 H37 107.5 . . ?
 C38 C37 C70 113.43(17) . . ?
 C70 C37 C36 108.67(16) . . ?
 C70 C37 H37 107.5 . . ?
 C39 C38 C37 122.09(16) . . ?
 C47 C38 C37 120.60(17) . . ?
 C47 C38 C39 117.31(17) . . ?
 C38 C39 N3 118.75(16) . . ?
 C48 C39 N3 118.60(16) . . ?
 C48 C39 C38 122.44(16) . . ?
 N3 C40 B1 123.42(14) . . ?
 N4 C40 N3 109.32(14) . . ?
 N4 C40 B1 126.23(14) . . ?
 O3 B1 Cl2 108.72(12) . . ?
 O3 B1 C40 106.33(13) . . ?
 O3 B1 C42 109.79(14) . . ?
 C40 B1 Cl2 100.46(11) . . ?
 C42 B1 Cl2 112.40(12) . . ?
 C42 B1 C40 118.43(14) . . ?
 C43 C42 B1 122.58(16) . . ?
 C43 C42 C54 116.21(16) . . ?
 C54 C42 B1 120.99(16) . . ?
 C42 C43 H43 119.2 . . ?
 C44 C43 C42 121.62(18) . . ?
 C44 C43 H43 119.2 . . ?
 C43 C44 H44 119.5 . . ?
 C45 C44 C43 120.99(18) . . ?
 C45 C44 H44 119.5 . . ?
 C44 C45 H45 120.7 . . ?
 C55 C45 C44 118.61(18) . . ?
 C55 C45 H45 120.7 . . ?
 C47 C46 H46 119.7 . . ?
 C52 C46 H46 119.7 . . ?
 C52 C46 C47 120.67(18) . . ?
 C38 C47 H47 119.4 . . ?
 C46 C47 C38 121.11(18) . . ?
 C46 C47 H47 119.4 . . ?
 C39 C48 C49 123.02(16) . . ?
 C52 C48 C39 117.59(17) . . ?
 C52 C48 C49 119.34(17) . . ?
 C48 C49 H49 108.0 . . ?
 C48 C49 C50 109.60(16) . . ?
 C48 C49 C51 112.99(16) . . ?
 C50 C49 H49 108.0 . . ?
 C51 C49 H49 108.0 . . ?
 C51 C49 C50 110.05(16) . . ?
 C49 C50 H50A 109.5 . . ?
 C49 C50 H50B 109.5 . . ?
 C49 C50 H50C 109.5 . . ?
 H50A C50 H50B 109.5 . . ?
 H50A C50 H50C 109.5 . . ?
 H50B C50 H50C 109.5 . . ?
 C49 C51 H51A 109.5 . . ?
 C49 C51 H51B 109.5 . . ?
 C49 C51 H51C 109.5 . . ?
 H51A C51 H51B 109.5 . . ?
 H51A C51 H51C 109.5 . . ?
 H51B C51 H51C 109.5 . . ?
 C46 C52 C48 120.88(18) . . ?
 C46 C52 H52 119.6 . . ?
 C48 C52 H52 119.6 . . ?
 F5 C53 S1 108.39(15) . . ?
 F5 C53 F6 107.21(18) . . ?
 F5 C53 F7 109.41(19) . . ?
 F5 C53 S2 120.4(2) . . ?
 F6 C53 S1 110.10(16) . . ?
 F6 C53 S2 128.3(2) . . ?
 F7 C53 S1 109.71(15) . . ?
 F7 C53 F6 111.93(19) . . ?
 F7 C53 S2 71.3(2) . . ?
 C42 C54 H54 118.9 . . ?
 C55 C54 C42 122.21(19) . . ?
 C55 C54 H54 118.9 . . ?
 C45 C55 C54 120.35(19) . . ?
 C45 C55 H55 119.8 . . ?
 C54 C55 H55 119.8 . . ?
 N4 C56 H56A 111.4 . . ?
 N4 C56 H56B 111.4 . . ?
 N4 C56 C57 102.02(14) . . ?
 H56A C56 H56B 109.2 . . ?
 C57 C56 H56A 111.4 . . ?
 C57 C56 H56B 111.4 . . ?
 N3 C57 C56 101.87(14) . . ?
 N3 C57 H57A 111.4 . . ?
 N3 C57 H57B 111.4 . . ?
 C56 C57 H57A 111.4 . . ?
 C56 C57 H57B 111.4 . . ?
 H57A C57 H57B 109.3 . . ?
 C59 C58 N4 118.19(15) . . ?
 C63 C58 N4 118.14(15) . . ?
 C63 C58 C59 123.05(16) . . ?
 C58 C59 C67 122.45(16) . . ?
 C60 C59 C58 117.11(17) . . ?
 C60 C59 C67 120.38(16) . . ?
 C59 C60 H60 119.5 . . ?
 C61 C60 C59 121.03(17) . . ?
 C61 C60 H60 119.5 . . ?
 C60 C61 H61 119.8 . . ?
 C62 C61 C60 120.36(17) . . ?
 C62 C61 H61 119.8 . . ?
 C61 C62 H62 119.4 . . ?
 C61 C62 C63 121.23(18) . . ?
 C63 C62 H62 119.4 . . ?
 C58 C63 C64 122.92(15) . . ?
 C62 C63 C58 117.20(16) . . ?
 C62 C63 C64 119.80(16) . . ?
 C63 C64 H64 108.0 . . ?
 C63 C64 C65 110.21(15) . . ?
 C63 C64 C66 111.94(15) . . ?
 C65 C64 H64 108.0 . . ?
 C66 C64 H64 108.0 . . ?
 C66 C64 C65 110.51(15) . . ?
 C64 C65 H65A 109.5 . . ?
 C64 C65 H65B 109.5 . . ?
 C64 C65 H65C 109.5 . . ?
 H65A C65 H65B 109.5 . . ?
 H65A C65 H65C 109.5 . . ?
 H65B C65 H65C 109.5 . . ?
 C64 C66 H66A 109.5 . . ?
 C64 C66 H66B 109.5 . . ?
 C64 C66 H66C 109.5 . . ?
 H66A C66 H66B 109.5 . . ?
 H66A C66 H66C 109.5 . . ?
 H66B C66 H66C 109.5 . . ?
 C59 C67 H67 108.0 . . ?
 C59 C67 C68 110.48(16) . . ?
 C59 C67 C69 112.66(16) . . ?
 C68 C67 H67 108.0 . . ?
 C69 C67 H67 108.0 . . ?
 C69 C67 C68 109.65(16) . . ?
 C67 C68 H68A 109.5 . . ?
 C67 C68 H68B 109.5 . . ?
 C67 C68 H68C 109.5 . . ?
 H68A C68 H68B 109.5 . . ?
 H68A C68 H68C 109.5 . . ?
 H68B C68 H68C 109.5 . . ?
 C67 C69 H69A 109.5 . . ?
 C67 C69 H69B 109.5 . . ?
 C67 C69 H69C 109.5 . . ?
 H69A C69 H69B 109.5 . . ?
 H69A C69 H69C 109.5 . . ?
 H69B C69 H69C 109.5 . . ?
 C37 C70 H70A 109.5 . . ?
 C37 C70 H70B 109.5 . . ?
 C37 C70 H70C 109.5 . . ?
 H70A C70 H70B 109.5 . . ?
 H70A C70 H70C 109.5 . . ?
 H70B C70 H70C 109.5 . . ?
 H71A C71 H71B 109.5 . . ?
 H71A C71 H71C 109.5 . . ?
 H71B C71 H71C 109.5 . . ?
 C72 C71 H71A 109.5 . . ?
 C72 C71 H71B 109.5 . . ?
 C72 C71 H71C 109.5 . . ?
 C73 C72 C71 121.0(2) . . ?
 C73 C72 C76 117.8(2) . . ?
 C76 C72 C71 121.1(2) . . ?
 C72 C73 H73 118.7 . . ?
 C72 C73 C74 122.5(2) . . ?
 C74 C73 H73 118.7 . . ?
 C73 C74 H74 120.1 . . ?
 C73 C74 C75 119.9(2) . . ?
 C75 C74 H74 120.1 . . ?
 C74 C75 H75 120.4 . . ?
 C77 C75 C74 119.1(2) . . ?
 C77 C75 H75 120.4 . . ?
 C72 C76 H76 119.6 . . ?
 C72 C76 C77 120.7(2) . . ?
 C77 C76 H76 119.6 . . ?
 C75 C77 C76 119.9(2) . . ?
 C75 C77 H77 120.0 . . ?
 C76 C77 H77 120.0 . . ?
 H78A C78 H78B 109.5 . . ?
 H78A C78 H78C 109.5 . . ?
 H78B C78 H78C 109.5 . . ?
 C79 C78 H78A 109.5 . . ?
 C79 C78 H78B 109.5 . . ?
 C79 C78 H78C 109.5 . . ?
 C80 C79 C78 120.6(2) . . ?
 C83 C79 C78 121.2(2) . . ?
 C83 C79 C80 118.2(2) . . ?
 C79 C80 H80 119.3 . . ?
 C81 C80 C79 121.4(2) . . ?
 C81 C80 H80 119.3 . . ?
 C80 C81 H81 119.8 . . ?
 C82 C81 C80 120.5(2) . . ?
 C82 C81 H81 119.8 . . ?
 C81 C82 H82 120.5 . . ?
 C81 C82 C84 119.1(2) . . ?
 C84 C82 H82 120.5 . . ?
 C79 C83 H83 119.4 . . ?
 C79 C83 C84 121.2(2) . . ?
 C84 C83 H83 119.4 . . ?
 C82 C84 C83 119.8(2) . . ?
 C82 C84 H84 120.1 . . ?
 C83 C84 H84 120.1 . . ?
 O1 S4 F2 117.7(5) . . ?
 O0AA S4 O1 104.7(4) . . ?
 O0AA S4 F2 137.5(5) . . ?
 O0AA S4 C33 119.4(5) . . ?
 C33 S4 O1 105.0(4) . . ?
 C33 S4 F2 47.5(2) . . ?
 F7 S2 O3 124.2(3) . . ?
 O5 S2 F7 135.9(3) . . ?
 O5 S2 O3 98.7(2) . . ?
 C53 S2 F7 53.18(18) . . ?
 C53 S2 O3 113.0(3) . . ?
 C53 S2 O5 122.6(3) . . ?

loop_
  _geom_torsion_atom_site_label_1
  _geom_torsion_atom_site_label_2
  _geom_torsion_atom_site_label_3
  _geom_torsion_atom_site_label_4
  _geom_torsion
  _geom_torsion_site_symmetry_1
  _geom_torsion_site_symmetry_2
  _geom_torsion_site_symmetry_3
  _geom_torsion_site_symmetry_4
  _geom_torsion_publ_flag
 Cl1 B2 C7 C8 -20.0(2) . . . . ?
 Cl1 B2 C7 C34 155.35(14) . . . . ?
 Cl2 B1 C42 C43 20.1(2) . . . . ?
 Cl2 B1 C42 C54 -154.18(15) . . . . ?
 S3 O1 B2 Cl1 -49.46(16) . . . . ?
 S3 O1 B2 C5 -156.56(11) . . . . ?
 S3 O1 B2 C7 73.43(17) . . . . ?
 S1 O3 B1 Cl2 79.16(16) . . . . ?
 S1 O3 B1 C40 -173.44(11) . . . . ?
 S1 O3 B1 C42 -44.2(2) . . . . ?
 O1 S3 C33 F2 59.61(14) . . . . ?
 O1 S3 C33 F3 -61.97(16) . . . . ?
 O1 S3 C33 F4 179.44(14) . . . . ?
 O1 B2 C7 C8 -140.11(16) . . . . ?
 O1 B2 C7 C34 35.2(2) . . . . ?
 F2 C33 S4 O1 114.0(4) . . . . ?
 F2 C33 S4 O0AA -129.2(5) . . . . ?
 F3 C33 S4 O1 13.3(6) . . . . ?
 F3 C33 S4 F2 -100.7(3) . . . . ?
 F3 C33 S4 O0AA 130.2(4) . . . . ?
 F4 C33 S4 O1 -142.9(3) . . . . ?
 F4 C33 S4 F2 103.2(2) . . . . ?
 F4 C33 S4 O0AA -26.0(6) . . . . ?
 F5 C53 S2 F7 102.0(3) . . . . ?
 F5 C53 S2 O3 -141.6(2) . . . . ?
 F5 C53 S2 O5 -23.8(5) . . . . ?
 F6 C53 S2 F7 -103.6(3) . . . . ?
 F6 C53 S2 O3 12.8(4) . . . . ?
 F6 C53 S2 O5 130.6(3) . . . . ?
 F7 C53 S2 O3 116.4(3) . . . . ?
 F7 C53 S2 O5 -125.8(3) . . . . ?
 O0AA S3 O1 B2 -43.69(15) . . . . ?
 O0AA S3 C33 F2 -56.47(15) . . . . ?
 O0AA S3 C33 F3 -178.04(14) . . . . ?
 O0AA S3 C33 F4 63.36(16) . . . . ?
 O2 S3 O1 B2 96.23(15) . . . . ?
 O2 S3 C33 F2 175.85(13) . . . . ?
 O2 S3 C33 F3 54.27(16) . . . . ?
 O2 S3 C33 F4 -64.32(16) . . . . ?
 O3 S1 C53 F5 179.77(16) . . . . ?
 O3 S1 C53 F6 -63.25(17) . . . . ?
 O3 S1 C53 F7 60.35(16) . . . . ?
 O3 B1 C42 C43 141.31(16) . . . . ?
 O3 B1 C42 C54 -33.0(2) . . . . ?
 O4 S1 O3 B1 123.00(15) . . . . ?
 O4 S1 C53 F5 -65.66(18) . . . . ?
 O4 S1 C53 F6 51.33(17) . . . . ?
 O4 S1 C53 F7 174.93(15) . . . . ?
 O5 S1 O3 B1 -19.24(17) . . . . ?
 O5 S1 C53 F5 62.89(18) . . . . ?
 O5 S1 C53 F6 179.87(15) . . . . ?
 O5 S1 C53 F7 -56.52(17) . . . . ?
 N1 C4 C28 C27 -175.97(15) . . . . ?
 N1 C4 C28 C29 1.8(3) . . . . ?
 N1 C5 B2 Cl1 76.96(17) . . . . ?
 N1 C5 B2 O1 -170.96(14) . . . . ?
 N1 C5 B2 C7 -45.7(2) . . . . ?
 N1 C23 C24 N2 19.67(17) . . . . ?
 N2 C5 B2 Cl1 -89.58(17) . . . . ?
 N2 C5 B2 O1 22.5(2) . . . . ?
 N2 C5 B2 C7 147.73(17) . . . . ?
 N3 C39 C48 C49 -1.4(3) . . . . ?
 N3 C39 C48 C52 175.99(15) . . . . ?
 N3 C40 B1 Cl2 -82.00(17) . . . . ?
 N3 C40 B1 O3 164.78(15) . . . . ?
 N3 C40 B1 C42 40.7(2) . . . . ?
 N4 C40 B1 Cl2 85.11(17) . . . . ?
 N4 C40 B1 O3 -28.1(2) . . . . ?
 N4 C40 B1 C42 -152.16(16) . . . . ?
 N4 C56 C57 N3 -19.65(17) . . . . ?
 N4 C58 C59 C60 172.74(15) . . . . ?
 N4 C58 C59 C67 -4.2(2) . . . . ?
 N4 C58 C63 C62 -172.02(15) . . . . ?
 N4 C58 C63 C64 4.7(2) . . . . ?
 C1 C2 C3 C4 -158.43(17) . . . . ?
 C1 C2 C3 C25 22.3(3) . . . . ?
 C2 C3 C4 N1 -3.1(3) . . . . ?
 C2 C3 C4 C28 -177.86(16) . . . . ?
 C2 C3 C25 C26 178.32(18) . . . . ?
 C3 C4 C28 C27 -1.3(3) . . . . ?
 C3 C4 C28 C29 176.45(16) . . . . ?
 C3 C25 C26 C27 0.4(3) . . . . ?
 C4 N1 C5 N2 -169.82(16) . . . . ?
 C4 N1 C5 B2 21.6(3) . . . . ?
 C4 N1 C23 C24 160.50(15) . . . . ?
 C4 C3 C25 C26 -1.0(3) . . . . ?
 C4 C28 C29 C30 -106.1(2) . . . . ?
 C4 C28 C29 C31 131.00(18) . . . . ?
 C5 N1 C4 C3 76.3(2) . . . . ?
 C5 N1 C4 C28 -108.8(2) . . . . ?
 C5 N1 C23 C24 -19.05(19) . . . . ?
 C5 N2 C22 C14 -83.1(2) . . . . ?
 C5 N2 C22 C18 105.4(2) . . . . ?
 C5 N2 C24 C23 -16.10(19) . . . . ?
 C5 B2 C7 C8 96.6(2) . . . . ?
 C5 B2 C7 C34 -88.0(2) . . . . ?
 B2 O1 S4 F2 -128.2(4) . . . . ?
 B2 O1 S4 O0AA 55.7(5) . . . . ?
 B2 O1 S4 C33 -177.7(2) . . . . ?
 B2 C7 C8 C9 176.05(17) . . . . ?
 B2 C7 C34 C35 -176.58(17) . . . . ?
 C7 C8 C9 C10 -0.1(3) . . . . ?
 C7 C34 C35 C10 0.8(3) . . . . ?
 C8 C7 C34 C35 -1.0(3) . . . . ?
 C8 C9 C10 C35 -0.1(3) . . . . ?
 C9 C10 C35 C34 -0.3(3) . . . . ?
 C11 C12 C14 C15 -55.2(2) . . . . ?
 C11 C12 C14 C22 126.93(19) . . . . ?
 C12 C14 C15 C16 -177.04(17) . . . . ?
 C12 C14 C22 N2 4.6(2) . . . . ?
 C12 C14 C22 C18 175.66(16) . . . . ?
 C13 C12 C14 C15 67.9(2) . . . . ?
 C13 C12 C14 C22 -109.97(19) . . . . ?
 C14 C15 C16 C17 0.5(3) . . . . ?
 C15 C14 C22 N2 -173.37(15) . . . . ?
 C15 C14 C22 C18 -2.3(3) . . . . ?
 C15 C16 C17 C18 -0.8(3) . . . . ?
 C16 C17 C18 C19 176.64(17) . . . . ?
 C16 C17 C18 C22 -0.4(3) . . . . ?
 C17 C18 C19 C20 53.0(2) . . . . ?
 C17 C18 C19 C21 -70.5(2) . . . . ?
 C17 C18 C22 N2 173.10(15) . . . . ?
 C17 C18 C22 C14 2.0(3) . . . . ?
 C19 C18 C22 N2 -3.9(2) . . . . ?
 C19 C18 C22 C14 -174.97(16) . . . . ?
 C22 N2 C5 N1 170.97(16) . . . . ?
 C22 N2 C5 B2 -21.0(3) . . . . ?
 C22 N2 C24 C23 175.35(15) . . . . ?
 C22 C14 C15 C16 1.0(3) . . . . ?
 C22 C18 C19 C20 -130.11(18) . . . . ?
 C22 C18 C19 C21 106.39(19) . . . . ?
 C23 N1 C4 C3 -103.13(19) . . . . ?
 C23 N1 C4 C28 71.8(2) . . . . ?
 C23 N1 C5 N2 9.66(19) . . . . ?
 C23 N1 C5 B2 -158.91(15) . . . . ?
 C24 N2 C5 N1 4.55(19) . . . . ?
 C24 N2 C5 B2 172.60(15) . . . . ?
 C24 N2 C22 C14 82.7(2) . . . . ?
 C24 N2 C22 C18 -88.76(19) . . . . ?
 C25 C3 C4 N1 176.11(16) . . . . ?
 C25 C3 C4 C28 1.4(3) . . . . ?
 C25 C26 C27 C28 -0.3(3) . . . . ?
 C26 C27 C28 C4 0.7(3) . . . . ?
 C26 C27 C28 C29 -177.11(17) . . . . ?
 C27 C28 C29 C30 71.6(2) . . . . ?
 C27 C28 C29 C31 -51.3(2) . . . . ?
 C32 C2 C3 C4 77.8(2) . . . . ?
 C32 C2 C3 C25 -101.4(2) . . . . ?
 C33 S3 O1 B2 -154.74(14) . . . . ?
 C33 F2 S4 O1 -85.2(5) . . . . ?
 C33 F2 S4 O0AA 89.2(7) . . . . ?
 C34 C7 C8 C9 0.6(3) . . . . ?
 C36 C37 C38 C39 -76.2(2) . . . . ?
 C36 C37 C38 C47 103.2(2) . . . . ?
 C37 C38 C39 N3 3.4(3) . . . . ?
 C37 C38 C39 C48 177.97(16) . . . . ?
 C37 C38 C47 C46 -178.48(17) . . . . ?
 C38 C39 C48 C49 -176.05(16) . . . . ?
 C38 C39 C48 C52 1.4(3) . . . . ?
 C39 N3 C40 N4 170.37(16) . . . . ?
 C39 N3 C40 B1 -20.6(3) . . . . ?
 C39 N3 C57 C56 -160.85(15) . . . . ?
 C39 C38 C47 C46 1.0(3) . . . . ?
 C39 C48 C49 C50 106.4(2) . . . . ?
 C39 C48 C49 C51 -130.47(18) . . . . ?
 C39 C48 C52 C46 -0.7(3) . . . . ?
 C40 N3 C39 C38 -76.8(2) . . . . ?
 C40 N3 C39 C48 108.4(2) . . . . ?
 C40 N3 C57 C56 18.77(19) . . . . ?
 C40 N4 C56 C57 16.37(19) . . . . ?
 C40 N4 C58 C59 82.4(2) . . . . ?
 C40 N4 C58 C63 -106.3(2) . . . . ?
 C40 B1 C42 C43 -96.4(2) . . . . ?
 C40 B1 C42 C54 89.3(2) . . . . ?
 B1 O3 S2 F7 -100.4(3) . . . . ?
 B1 O3 S2 O5 68.4(2) . . . . ?
 B1 O3 S2 C53 -160.5(2) . . . . ?
 B1 C42 C43 C44 -174.28(17) . . . . ?
 B1 C42 C54 C55 174.11(18) . . . . ?
 C42 C43 C44 C45 0.7(3) . . . . ?
 C42 C54 C55 C45 -0.1(3) . . . . ?
 C43 C42 C54 C55 -0.6(3) . . . . ?
 C43 C44 C45 C55 -1.4(3) . . . . ?
 C44 C45 C55 C54 1.1(3) . . . . ?
 C47 C38 C39 N3 -176.12(16) . . . . ?
 C47 C38 C39 C48 -1.5(3) . . . . ?
 C47 C46 C52 C48 0.3(3) . . . . ?
 C49 C48 C52 C46 176.81(17) . . . . ?
 C52 C46 C47 C38 -0.4(3) . . . . ?
 C52 C48 C49 C50 -71.0(2) . . . . ?
 C52 C48 C49 C51 52.1(2) . . . . ?
 C53 S1 O3 B1 -129.58(16) . . . . ?
 C53 F7 S2 O3 -94.7(3) . . . . ?
 C53 F7 S2 O5 101.3(4) . . . . ?
 C54 C42 C43 C44 0.3(3) . . . . ?
 C56 N4 C40 N3 -5.03(19) . . . . ?
 C56 N4 C40 B1 -173.64(15) . . . . ?
 C56 N4 C58 C59 -85.71(19) . . . . ?
 C56 N4 C58 C63 85.55(19) . . . . ?
 C57 N3 C39 C38 102.73(19) . . . . ?
 C57 N3 C39 C48 -72.1(2) . . . . ?
 C57 N3 C40 N4 -9.20(19) . . . . ?
 C57 N3 C40 B1 159.80(15) . . . . ?
 C58 N4 C40 N3 -173.59(16) . . . . ?
 C58 N4 C40 B1 17.8(3) . . . . ?
 C58 N4 C56 C57 -173.21(15) . . . . ?
 C58 C59 C60 C61 -1.4(3) . . . . ?
 C58 C59 C67 C68 106.60(19) . . . . ?
 C58 C59 C67 C69 -130.38(18) . . . . ?
 C58 C63 C64 C65 -108.73(19) . . . . ?
 C58 C63 C64 C66 127.85(18) . . . . ?
 C59 C58 C63 C62 -1.2(3) . . . . ?
 C59 C58 C63 C64 175.56(16) . . . . ?
 C59 C60 C61 C62 0.3(3) . . . . ?
 C60 C59 C67 C68 -70.3(2) . . . . ?
 C60 C59 C67 C69 52.7(2) . . . . ?
 C60 C61 C62 C63 0.5(3) . . . . ?
 C61 C62 C63 C58 0.0(3) . . . . ?
 C61 C62 C63 C64 -176.89(17) . . . . ?
 C62 C63 C64 C65 68.0(2) . . . . ?
 C62 C63 C64 C66 -55.5(2) . . . . ?
 C63 C58 C59 C60 1.9(3) . . . . ?
 C63 C58 C59 C67 -175.04(16) . . . . ?
 C67 C59 C60 C61 175.59(17) . . . . ?
 C70 C37 C38 C39 160.27(17) . . . . ?
 C70 C37 C38 C47 -20.3(3) . . . . ?
 C71 C72 C73 C74 179.9(2) . . . . ?
 C71 C72 C76 C77 178.9(2) . . . . ?
 C72 C73 C74 C75 1.8(3) . . . . ?
 C72 C76 C77 C75 0.6(4) . . . . ?
 C73 C72 C76 C77 0.5(3) . . . . ?
 C73 C74 C75 C77 -0.6(3) . . . . ?
 C74 C75 C77 C76 -0.5(3) . . . . ?
 C76 C72 C73 C74 -1.8(3) . . . . ?
 C78 C79 C80 C81 180.0(2) . . . . ?
 C78 C79 C83 C84 -179.0(2) . . . . ?
 C79 C80 C81 C82 -1.5(3) . . . . ?
 C79 C83 C84 C82 -0.4(4) . . . . ?
 C80 C79 C83 C84 -0.5(3) . . . . ?
 C80 C81 C82 C84 0.6(4) . . . . ?
 C81 C82 C84 C83 0.3(4) . . . . ?
 C83 C79 C80 C81 1.4(3) . . . . ?
 S4 O1 B2 Cl1 -100.4(3) . . . . ?
 S4 O1 B2 C5 152.5(3) . . . . ?
 S4 O1 B2 C7 22.5(4) . . . . ?
 S4 F2 C33 F3 126.7(3) . . . . ?
 S4 F2 C33 F4 -114.8(3) . . . . ?
 S2 F7 C53 F5 -116.6(3) . . . . ?
 S2 F7 C53 F6 124.7(3) . . . . ?
 S2 O3 B1 Cl2 33.1(2) . . . . ?
 S2 O3 B1 C40 140.50(19) . . . . ?
 S2 O3 B1 C42 -90.2(2) . . . . ?

_shelx_res_file
;
TITL mo_GAR_116_0m_a.res in P2(1)/n
    mo_gar_116_0m_a.res
    created by SHELXL-2018/3 at 10:05:08 on 08-Jun-2022
CELL 0.71073 16.0556 22.2837 23.3059 90 107.669 90
ZERR 8 0.0005 0.0007 0.0007 0 0.001 0
LATT 1
SYMM 0.5-X,0.5+Y,0.5-Z
SFAC C H B Cl F N O S
UNIT 328 408 8 8 24 16 24 8

L.S. 50
PLAN  -10 0 0
SIZE 0.2 0.22 0.26
TEMP -173.15
CONF
HTAB
BOND $H
MORE -1
fmap 2
acta
OMIT -3 50
OMIT 1 1 2
OMIT -1 2 2
OMIT 0 3 10
OMIT 1 2 0
OMIT 2 0 10
OMIT 5 2 2
OMIT 1 8 4
OMIT 4 3 2
OMIT 6 4 8
OMIT 0 2 1
OMIT 6 0 0
OMIT -2 8 2
OMIT 0 2 2
OMIT -7 1 12
OMIT -5 4 10
OMIT -3 1 4
OMIT 0 6 12
OMIT 7 3 4
OMIT -9 6 6
OMIT -1 9 6
OMIT -2 9 8
OMIT -8 2 10
OMIT -3 7 6
OMIT 10 3 4
OMIT 6 1 6
OMIT -7 3 2
OMIT 4 2 10
OMIT 0 12 0
OMIT 2 1 12
OMIT -9 6 18
OMIT 5 6 10
OMIT -4 11 4
OMIT -1 4 4
OMIT 5 8 6
OMIT 2 3 10
OMIT -4 3 10
OMIT 8 4 4
OMIT -1 0 3
OMIT 0 6 8
OMIT -4 14 6
OMIT 10 0 0
OMIT 8 10 4
OMIT -7 3 14
OMIT 10 1 4
OMIT 7 9 4
OMIT 4 0 6
OMIT -6 5 12
OMIT -6 7 12
OMIT 1 9 6
OMIT -7 2 8
OMIT -1 12 4
OMIT -6 4 4
REM <olex2.extras>
REM <HklSrc "%.\\mo_gar_116_0m_a.hkl">
REM </olex2.extras>

WGHT    0.075300    5.294300
FVAR       0.37300   0.88121   0.93265
CL1   4    0.520043    0.724714    0.222580    11.00000    0.01312    0.01555 =
         0.02153   -0.00024    0.00755    0.00265
CL2   4    0.020906    0.763488    0.219765    11.00000    0.01207    0.02095 =
         0.02017    0.00598    0.00601   -0.00116
PART 3
S3    8    0.534253    0.853914    0.159452    31.00000    0.01556    0.01418 =
         0.01552    0.00129    0.00840   -0.00081

PART 0
PART 1
S1    8    0.040161    0.603740    0.192664    21.00000    0.01158    0.01432 =
         0.01350   -0.00105    0.00390    0.00288

PART 0
O1    7    0.467891    0.842339    0.193222    11.00000    0.01278    0.01923 =
         0.01597    0.00550    0.00608    0.00220
F2    5    0.505327    0.966646    0.178169    11.00000    0.04365    0.01912 =
         0.04431   -0.00533    0.01508   -0.00152
F3    5    0.418057    0.929556    0.096173    11.00000    0.02228    0.04451 =
         0.03453    0.01759   -0.00141   -0.00180
F4    5    0.551146    0.948514    0.101138    11.00000    0.03692    0.04330 =
         0.05091    0.02393    0.02344   -0.00230

F5    5    0.060175    0.578962    0.089866    11.00000    0.03597    0.06630 =
         0.03132   -0.01624    0.01474    0.01537
F6    5   -0.074290    0.588121    0.087338    11.00000    0.02253    0.10557 =
         0.02896   -0.02863   -0.00241    0.00911
F7    5    0.009800    0.668857    0.095991    11.00000    0.08416    0.04772 =
         0.04042    0.02558    0.03833    0.03192
O0AA  7    0.621430    0.860077    0.199384    11.00000    0.01414    0.02894 =
         0.03168    0.00837    0.00883    0.00101
O2    7    0.517985    0.819277    0.105891    11.00000    0.04461    0.02833 =
         0.02664   -0.00922    0.02272   -0.01085
O3    7   -0.028720    0.643236    0.206942    11.00000    0.01196    0.02221 =
         0.01724   -0.00815    0.00270    0.00205
O4    7    0.024662    0.541344    0.200635    11.00000    0.03473    0.01894 =
         0.04907    0.00788    0.02459    0.00869
O5    7    0.125649    0.629470    0.212068    11.00000    0.01240    0.03224 =
         0.02959   -0.00933    0.00640   -0.00003
N1    6    0.370797    0.748011    0.294112    11.00000    0.01022    0.01340 =
         0.01217    0.00187    0.00444   -0.00215
N2    6    0.309671    0.782375    0.203559    11.00000    0.00911    0.01405 =
         0.01278    0.00377    0.00405   -0.00071
N3    6   -0.125333    0.749214    0.298248    11.00000    0.01057    0.01365 =
         0.01240   -0.00273    0.00442    0.00071
N4    6   -0.185924    0.710954    0.209384    11.00000    0.00865    0.01344 =
         0.01242   -0.00381    0.00392    0.00050
C1    1    0.429173    0.899865    0.419793    11.00000    0.03432    0.02654 =
         0.03142   -0.01016    0.00996   -0.00123
AFIX 137
H1A   2    0.416480    0.894976    0.458089    11.00000   -1.50000
H1B   2    0.404605    0.937940    0.401137    11.00000   -1.50000
H1C   2    0.492596    0.899923    0.427139    11.00000   -1.50000
AFIX   0
C2    1    0.388248    0.847858    0.377578    11.00000    0.02431    0.02042 =
         0.01773   -0.00267    0.01006   -0.00129
AFIX  13
H2    2    0.392571    0.858032    0.336788    11.00000   -1.20000
AFIX   0
C3    1    0.434514    0.787952    0.396073    11.00000    0.01801    0.02336 =
         0.01429    0.00002    0.00814   -0.00396
C4    1    0.427367    0.740505    0.354985    11.00000    0.01308    0.02013 =
         0.01019    0.00261    0.00439   -0.00358
C5    1    0.383908    0.779614    0.248635    11.00000    0.01223    0.00905 =
         0.01039   -0.00089    0.00479    0.00218
B2    3    0.481891    0.798633    0.246030    11.00000    0.01037    0.01341 =
         0.01264    0.00180    0.00522    0.00134
C7    1    0.550237    0.825618    0.305268    11.00000    0.01167    0.02039 =
         0.01352    0.00073    0.00258   -0.00444
C8    1    0.614378    0.790416    0.345849    11.00000    0.01616    0.03169 =
         0.01635    0.00151    0.00751   -0.00017
AFIX  43
H8    2    0.615477    0.748344    0.339533    11.00000   -1.20000
AFIX   0
C9    1    0.675610    0.815770    0.394556    11.00000    0.01834    0.05185 =
         0.01442    0.00239    0.00254   -0.00173
AFIX  43
H9    2    0.718231    0.791037    0.421345    11.00000   -1.20000
AFIX   0
C10   1    0.675635    0.877557    0.404945    11.00000    0.03181    0.05395 =
         0.01943   -0.01102    0.00762   -0.01919
AFIX  43
H10   2    0.717919    0.894859    0.438636    11.00000   -1.20000
AFIX   0
C11   1    0.309502    0.967132    0.218236    11.00000    0.02996    0.02734 =
         0.03700   -0.01264    0.01556   -0.00757
AFIX 137
H11A  2    0.369180    0.960359    0.216870    11.00000   -1.50000
H11B  2    0.311535    0.983890    0.257515    11.00000   -1.50000
H11C  2    0.279580    0.995322    0.186369    11.00000   -1.50000
AFIX   0
C12   1    0.259746    0.907381    0.208772    11.00000    0.02041    0.01719 =
         0.02158   -0.00011    0.00760    0.00383
AFIX  13
H12   2    0.289683    0.880177    0.242930    11.00000   -1.20000
AFIX   0
C13   1    0.165532    0.917778    0.210514    11.00000    0.02683    0.02301 =
         0.03963   -0.00120    0.01845    0.00026
AFIX 137
H13A  2    0.134626    0.944093    0.177153    11.00000   -1.50000
H13B  2    0.167145    0.936631    0.248826    11.00000   -1.50000
H13C  2    0.134985    0.879213    0.206668    11.00000   -1.50000
AFIX   0
C14   1    0.259410    0.876598    0.150487    11.00000    0.01102    0.01526 =
         0.01961    0.00210    0.00342    0.00053
C15   1    0.228608    0.907302    0.096073    11.00000    0.01804    0.01437 =
         0.02428    0.00401    0.00207    0.00263
AFIX  43
H15   2    0.210607    0.947921    0.096003    11.00000   -1.20000
AFIX   0
C16   1    0.223876    0.879414    0.042089    11.00000    0.02054    0.01968 =
         0.01743    0.00812   -0.00097   -0.00135
AFIX  43
H16   2    0.203173    0.901082    0.005392    11.00000   -1.20000
AFIX   0
C17   1    0.249138    0.820184    0.041337    11.00000    0.02143    0.01913 =
         0.01406    0.00210    0.00164   -0.00218
AFIX  43
H17   2    0.244806    0.801498    0.003904    11.00000   -1.20000
AFIX   0
C18   1    0.280878    0.787297    0.094484    11.00000    0.01115    0.01542 =
         0.01606    0.00280    0.00205   -0.00106
C19   1    0.303394    0.721347    0.091904    11.00000    0.01860    0.01561 =
         0.01548    0.00166    0.00289    0.00076
AFIX  13
H19   2    0.332982    0.707434    0.133964    11.00000   -1.20000
AFIX   0
C20   1    0.365978    0.711058    0.054865    11.00000    0.02445    0.02137 =
         0.02254   -0.00193    0.00732    0.00044
AFIX 137
H20A  2    0.339998    0.726977    0.014139    11.00000   -1.50000
H20B  2    0.376696    0.667953    0.052632    11.00000   -1.50000
H20C  2    0.421385    0.731643    0.074065    11.00000   -1.50000
AFIX   0
C21   1    0.219552    0.684207    0.066615    11.00000    0.02665    0.01721 =
         0.02555   -0.00165    0.00664   -0.00503
AFIX 137
H21A  2    0.180599    0.690941    0.091226    11.00000   -1.50000
H21B  2    0.234570    0.641521    0.067479    11.00000   -1.50000
H21C  2    0.190033    0.696482    0.025017    11.00000   -1.50000
AFIX   0
C22   1    0.286528    0.817036    0.148506    11.00000    0.00863    0.01604 =
         0.01336    0.00458    0.00197   -0.00069
C23   1    0.283766    0.718495    0.275090    11.00000    0.01242    0.02023 =
         0.01824    0.00251    0.00527   -0.00519
AFIX  23
H23A  2    0.254365    0.721591    0.306668    11.00000   -1.20000
H23B  2    0.288456    0.675702    0.265078    11.00000   -1.20000
AFIX   0
C24   1    0.236493    0.754312    0.220111    11.00000    0.01113    0.02393 =
         0.02149    0.00654    0.00528   -0.00408
AFIX  23
H24A  2    0.201186    0.728060    0.187484    11.00000   -1.20000
H24B  2    0.198053    0.785000    0.229589    11.00000   -1.20000
AFIX   0
C25   1    0.485312    0.778018    0.455427    11.00000    0.02280    0.03444 =
         0.01598   -0.00523    0.00698   -0.00654
AFIX  43
H25   2    0.492172    0.809360    0.484125    11.00000   -1.20000
AFIX   0
C26   1    0.525948    0.723444    0.473399    11.00000    0.02244    0.03949 =
         0.01384    0.00632    0.00296   -0.00244
AFIX  43
H26   2    0.559900    0.717682    0.514181    11.00000   -1.20000
AFIX   0
C27   1    0.517576    0.677619    0.432784    11.00000    0.01963    0.02829 =
         0.01852    0.00876    0.00479   -0.00039
AFIX  43
H27   2    0.546108    0.640471    0.445764    11.00000   -1.20000
AFIX   0
C28   1    0.467525    0.684752    0.372360    11.00000    0.01467    0.02115 =
         0.01583    0.00663    0.00603   -0.00247
C29   1    0.456546    0.631911    0.329688    11.00000    0.02154    0.01796 =
         0.02005    0.00664    0.00745    0.00340
AFIX  13
H29   2    0.427914    0.646740    0.287829    11.00000   -1.20000
AFIX   0
C30   1    0.396102    0.584961    0.344596    11.00000    0.03733    0.02024 =
         0.02923    0.00528    0.01160   -0.00405
AFIX 137
H30A  2    0.423523    0.569170    0.385204    11.00000   -1.50000
H30B  2    0.386121    0.552070    0.315375    11.00000   -1.50000
H30C  2    0.340117    0.603703    0.342714    11.00000   -1.50000
AFIX   0
C31   1    0.544021    0.602822    0.331398    11.00000    0.03172    0.02676 =
         0.03171    0.00895    0.01148    0.01365
AFIX 137
H31A  2    0.582542    0.633201    0.322569    11.00000   -1.50000
H31B  2    0.533622    0.570795    0.301227    11.00000   -1.50000
H31C  2    0.571697    0.585914    0.371490    11.00000   -1.50000
AFIX   0
C32   1    0.290990    0.844055    0.372245    11.00000    0.02488    0.02410 =
         0.03588   -0.00201    0.01200    0.00209
AFIX 137
H32A  2    0.263176    0.813001    0.342908    11.00000   -1.50000
H32B  2    0.263098    0.882849    0.358857    11.00000   -1.50000
H32C  2    0.284430    0.833880    0.411555    11.00000   -1.50000
AFIX   0
C33   1    0.499230    0.929553    0.132222    11.00000    0.02079    0.02566 =
         0.03088    0.00518    0.00753   -0.00322
C34   1    0.551963    0.887331    0.316245    11.00000    0.02424    0.02483 =
         0.02234   -0.00284    0.00988   -0.00547
AFIX  43
H34   2    0.510003    0.912303    0.289228    11.00000   -1.20000
AFIX   0
C35   1    0.613226    0.913339    0.365513    11.00000    0.03577    0.03580 =
         0.02739   -0.01210    0.01401   -0.01839
AFIX  43
H35   2    0.612329    0.955371    0.372117    11.00000   -1.20000
AFIX   0

C36   1   -0.206008    0.658954    0.379294    11.00000    0.02562    0.02639 =
         0.03407    0.00051    0.01346   -0.00479
AFIX 137
H36A  2   -0.214481    0.672920    0.417005    11.00000   -1.50000
H36B  2   -0.233158    0.619419    0.368963    11.00000   -1.50000
H36C  2   -0.233075    0.687453    0.346988    11.00000   -1.50000
AFIX   0
C37   1   -0.107735    0.654362    0.387013    11.00000    0.02572    0.01777 =
         0.02007    0.00154    0.01147   -0.00082
AFIX  13
H37   2   -0.101349    0.641020    0.347596    11.00000   -1.20000
AFIX   0
C38   1   -0.061808    0.714756    0.402313    11.00000    0.01834    0.02124 =
         0.01433   -0.00181    0.00804    0.00262
C39   1   -0.068966    0.759632    0.358653    11.00000    0.01382    0.01679 =
         0.01174   -0.00362    0.00554    0.00201
C40   1   -0.111944    0.715181    0.254496    11.00000    0.01291    0.00842 =
         0.01071    0.00073    0.00548   -0.00209
B1    3   -0.014133    0.694223    0.252962    11.00000    0.01123    0.01397 =
         0.01275   -0.00316    0.00481   -0.00194
C42   1    0.056216    0.674104    0.314774    11.00000    0.01218    0.01765 =
         0.01250   -0.00194    0.00422    0.00204
C43   1    0.119928    0.713573    0.349968    11.00000    0.01717    0.02041 =
         0.01510   -0.00147    0.00751    0.00011
AFIX  43
H43   2    0.118329    0.754655    0.338795    11.00000   -1.20000
AFIX   0
C44   1    0.184676    0.694018    0.400330    11.00000    0.01758    0.03257 =
         0.01540   -0.00406    0.00357   -0.00256
AFIX  43
H44   2    0.226293    0.721896    0.423342    11.00000   -1.20000
AFIX   0
C45   1    0.189875    0.634044    0.417887    11.00000    0.02418    0.03733 =
         0.01640    0.00524    0.00245    0.00712
AFIX  43
H45   2    0.235276    0.620631    0.452057    11.00000   -1.20000
AFIX   0
C46   1    0.029365    0.782932    0.475909    11.00000    0.02226    0.03448 =
         0.01350   -0.00705    0.00295    0.00147
AFIX  43
H46   2    0.063290    0.790856    0.516293    11.00000   -1.20000
AFIX   0
C47   1   -0.010991    0.727720    0.461209    11.00000    0.02160    0.02967 =
         0.01561    0.00184    0.00688    0.00466
AFIX  43
H47   2   -0.004029    0.698144    0.491665    11.00000   -1.20000
AFIX   0
C48   1   -0.029077    0.816099    0.372748    11.00000    0.01408    0.01845 =
         0.01657   -0.00597    0.00590    0.00182
C49   1   -0.040827    0.866125    0.327112    11.00000    0.02007    0.01549 =
         0.02149   -0.00534    0.00712   -0.00295
AFIX  13
H49   2   -0.070085    0.848967    0.286309    11.00000   -1.20000
AFIX   0
C50   1   -0.101078    0.914643    0.339703    11.00000    0.03574    0.01726 =
         0.03325   -0.00462    0.01144    0.00387
AFIX 137
H50A  2   -0.156879    0.896479    0.339212    11.00000   -1.50000
H50B  2   -0.111504    0.945789    0.308636    11.00000   -1.50000
H50C  2   -0.073262    0.932590    0.379288    11.00000   -1.50000
AFIX   0
C51   1    0.046029    0.894225    0.326191    11.00000    0.02917    0.02317 =
         0.03413   -0.00559    0.01196   -0.01051
AFIX 137
H51A  2    0.075542    0.911884    0.365645    11.00000   -1.50000
H51B  2    0.034632    0.925552    0.295259    11.00000   -1.50000
H51C  2    0.083374    0.863182    0.317080    11.00000   -1.50000
AFIX   0
C52   1    0.020836    0.826478    0.432598    11.00000    0.01806    0.02360 =
         0.02050   -0.01034    0.00385   -0.00124
AFIX  43
H52   2    0.049173    0.864063    0.443438    11.00000   -1.20000
AFIX   0
C53   1    0.005998    0.611109    0.111062    11.00000    0.02940    0.04429 =
         0.02342   -0.00409    0.00867    0.01193
C54   1    0.062155    0.614386    0.333913    11.00000    0.02148    0.02099 =
         0.02421    0.00087    0.00674    0.00072
AFIX  43
H54   2    0.020112    0.586361    0.311633    11.00000   -1.20000
AFIX   0
C55   1    0.127743    0.594544    0.384632    11.00000    0.02988    0.02452 =
         0.02701    0.00947    0.00943    0.00827
AFIX  43
H55   2    0.129610    0.553603    0.396322    11.00000   -1.20000
AFIX   0
C56   1   -0.259500    0.740186    0.224305    11.00000    0.01041    0.02220 =
         0.02152   -0.00606    0.00558    0.00322
AFIX  23
H56A  2   -0.297799    0.710236    0.235070    11.00000   -1.20000
H56B  2   -0.294847    0.765050    0.190439    11.00000   -1.20000
AFIX   0
C57   1   -0.212626    0.778346    0.277685    11.00000    0.01247    0.01823 =
         0.01957   -0.00327    0.00530    0.00377
AFIX  23
H57A  2   -0.208201    0.820575    0.265737    11.00000   -1.20000
H57B  2   -0.242177    0.776985    0.309275    11.00000   -1.20000
AFIX   0
C58   1   -0.208309    0.675578    0.154838    11.00000    0.00816    0.01307 =
         0.01478   -0.00541    0.00161    0.00042
C59   1   -0.232875    0.615439    0.158029    11.00000    0.01050    0.01606 =
         0.02081   -0.00325    0.00439   -0.00039
C60   1   -0.263917    0.584247    0.103756    11.00000    0.01823    0.01441 =
         0.02737   -0.00658    0.00333   -0.00302
AFIX  43
H60   2   -0.279869    0.543237    0.104211    11.00000   -1.20000
AFIX   0
C61   1   -0.271830    0.612180    0.049208    11.00000    0.01913    0.02184 =
         0.01833   -0.00904   -0.00091    0.00071
AFIX  43
H61   2   -0.293359    0.590271    0.012722    11.00000   -1.20000
AFIX   0
C62   1   -0.248583    0.671694    0.047618    11.00000    0.01879    0.01996 =
         0.01556   -0.00424    0.00054    0.00334
AFIX  43
H62   2   -0.254776    0.690299    0.009873    11.00000   -1.20000
AFIX   0
C63   1   -0.216167    0.705001    0.100420    11.00000    0.00997    0.01596 =
         0.01592   -0.00280    0.00123    0.00289
C64   1   -0.195568    0.771303    0.096833    11.00000    0.01776    0.01518 =
         0.01511   -0.00180    0.00211    0.00008
AFIX  13
H64   2   -0.167577    0.786197    0.138750    11.00000   -1.20000
AFIX   0
C65   1   -0.280471    0.807092    0.069648    11.00000    0.02364    0.01790 =
         0.02262    0.00147    0.00394    0.00634
AFIX 137
H65A  2   -0.307821    0.794428    0.027884    11.00000   -1.50000
H65B  2   -0.266902    0.850028    0.070609    11.00000   -1.50000
H65C  2   -0.320721    0.799597    0.093150    11.00000   -1.50000
AFIX   0
C66   1   -0.131827    0.781921    0.060711    11.00000    0.02304    0.02057 =
         0.02067    0.00174    0.00644    0.00078
AFIX 137
H66A  2   -0.075479    0.763263    0.081541    11.00000   -1.50000
H66B  2   -0.123658    0.825151    0.056857    11.00000   -1.50000
H66C  2   -0.155463    0.764159    0.020569    11.00000   -1.50000
AFIX   0
C67   1   -0.230727    0.585559    0.217010    11.00000    0.02081    0.01519 =
         0.02438   -0.00182    0.00898   -0.00395
AFIX  13
H67   2   -0.198675    0.612726    0.250613    11.00000   -1.20000
AFIX   0
C68   1   -0.324164    0.577093    0.220739    11.00000    0.02805    0.02191 =
         0.04276    0.00069    0.02199   -0.00110
AFIX 137
H68A  2   -0.353593    0.616107    0.216456    11.00000   -1.50000
H68B  2   -0.321545    0.559480    0.259777    11.00000   -1.50000
H68C  2   -0.356798    0.550308    0.188354    11.00000   -1.50000
AFIX   0
C69   1   -0.183171    0.524906    0.226134    11.00000    0.02616    0.02317 =
         0.03532    0.00814    0.01420    0.00433
AFIX 137
H69A  2   -0.215593    0.496633    0.195180    11.00000   -1.50000
H69B  2   -0.179420    0.509064    0.266068    11.00000   -1.50000
H69C  2   -0.124141    0.530299    0.222980    11.00000   -1.50000
AFIX   0
C70   1   -0.068199    0.605231    0.433479    11.00000    0.03782    0.02530 =
         0.03242    0.00940    0.01108   -0.00013
AFIX 137
H70A  2   -0.004701    0.604117    0.441300    11.00000   -1.50000
H70B  2   -0.093277    0.566269    0.417777    11.00000   -1.50000
H70C  2   -0.081381    0.613945    0.471019    11.00000   -1.50000
AFIX   0

C71   1    0.489811    0.566732    0.061612    11.00000    0.04178    0.03798 =
         0.07354    0.02164    0.02976    0.01029
AFIX 137
H71A  2    0.530194    0.532644    0.068266    11.00000   -1.50000
H71B  2    0.520769    0.602093    0.082648    11.00000   -1.50000
H71C  2    0.467135    0.575193    0.018385    11.00000   -1.50000
AFIX   0
C72   1    0.414913    0.551748    0.085524    11.00000    0.03831    0.02181 =
         0.03930    0.00822    0.01299    0.00585
C73   1    0.341036    0.523764    0.049870    11.00000    0.04671    0.01763 =
         0.03560    0.00200    0.01112    0.00031
AFIX  43
H73   2    0.337750    0.513977    0.009568    11.00000   -1.20000
AFIX   0
C74   1    0.271764    0.509401    0.070259    11.00000    0.04075    0.02280 =
         0.04093   -0.00237    0.00678   -0.00561
AFIX  43
H74   2    0.222490    0.489018    0.044606    11.00000   -1.20000
AFIX   0
C75   1    0.273866    0.524703    0.128368    11.00000    0.04007    0.02730 =
         0.04419    0.00795    0.01644    0.00094
AFIX  43
H75   2    0.225993    0.515279    0.142707    11.00000   -1.20000
AFIX   0
C76   1    0.417385    0.567079    0.143434    11.00000    0.04466    0.02788 =
         0.03449    0.00499    0.00041   -0.00003
AFIX  43
H76   2    0.467430    0.586787    0.168977    11.00000   -1.20000
AFIX   0
C77   1    0.346386    0.553784    0.165062    11.00000    0.05504    0.03065 =
         0.02675    0.00254    0.01014    0.00339
AFIX  43
H77   2    0.348518    0.564846    0.204849    11.00000   -1.20000
AFIX   0

C78   1    0.983021    0.930661    0.053918    11.00000    0.04342    0.04140 =
         0.05498   -0.01297    0.02540   -0.00697
AFIX 137
H78A  2    1.023573    0.964633    0.060263    11.00000   -1.50000
H78B  2    0.959865    0.922077    0.010739    11.00000   -1.50000
H78C  2    1.013945    0.895287    0.074951    11.00000   -1.50000
AFIX   0
C79   1    0.908540    0.946054    0.078275    11.00000    0.03542    0.02096 =
         0.03480   -0.00787    0.01235   -0.00647
C80   1    0.834988    0.974929    0.042527    11.00000    0.04895    0.01945 =
         0.03429   -0.00173    0.01234   -0.00180
AFIX  43
H80   2    0.831573    0.985121    0.002296    11.00000   -1.20000
AFIX   0
C81   1    0.766397    0.989281    0.063995    11.00000    0.03676    0.02627 =
         0.04333   -0.00143    0.00511    0.00468
AFIX  43
H81   2    0.717098    1.010029    0.038827    11.00000   -1.20000
AFIX   0
C82   1    0.768849    0.973697    0.121874    11.00000    0.03420    0.03171 =
         0.04610   -0.01183    0.01644   -0.00219
AFIX  43
H82   2    0.721331    0.983238    0.136543    11.00000   -1.20000
AFIX   0
C83   1    0.911052    0.930530    0.136150    11.00000    0.03431    0.03250 =
         0.03059   -0.00488    0.00118    0.00120
AFIX  43
H83   2    0.960933    0.910370    0.161341    11.00000   -1.20000
AFIX   0
C84   1    0.841659    0.943929    0.158251    11.00000    0.04525    0.03821 =
         0.02733   -0.00570    0.00927   -0.00313
AFIX  43
H84   2    0.844240    0.932710    0.198079    11.00000   -1.20000
AFIX   0

PART 4
S4    8    0.540749    0.893608    0.191883   -31.00000    0.02927    0.01622 =
         0.02921   -0.00501    0.01303   -0.00701

PART 0
PART 2
S2    8    0.037698    0.644435    0.163057   -21.00000    0.02325    0.02238 =
         0.01972    0.00142    0.01219    0.00074
HKLF 4


REM  mo_GAR_116_0m_a.res in P2(1)/n
REM wR2 = 0.1386, GooF = S = 1.136, Restrained GooF = 1.136 for all data
REM R1 = 0.0463 for 12543 Fo > 4sig(Fo) and 0.0508 for all 13881 data
REM 975 parameters refined using 0 restraints

END

WGHT      0.0747      7.2537

REM Instructions for potential hydrogen bonds
HTAB C24 O5
HTAB C24 Cl2
EQIV $1 x-1, y, z
HTAB C56 Cl1_$1
HTAB C56 O0AA_$1

REM Highest difference peak  1.111,  deepest hole -0.427,  1-sigma level  0.060
Q1    1   0.0527  0.5404  0.1135  11.00000  0.05    1.11
Q2    1   0.6246  0.8313  0.3373  11.00000  0.05    1.06
Q3    1   0.0002  0.5642  0.1328  11.00000  0.05    1.01
Q4    1   0.1237  0.6692  0.3402  11.00000  0.05    0.82
Q5    1   0.5066  0.8824  0.1064  11.00000  0.05    0.73
Q6    1   0.5631  0.9066  0.0860  11.00000  0.05    0.73
Q7    1  -0.0097  0.5293  0.1653  11.00000  0.05    0.69
Q8    1   0.3862  0.5300  0.0204  11.00000  0.05    0.57
Q9    1   0.5422  0.9473  0.2140  11.00000  0.05    0.46
Q10   1   0.6645  0.8524  0.2960  11.00000  0.05    0.46
;
_shelx_res_checksum                39644
_shelx_hkl_file
;
  -3   0   0    4.90    1.20
   3   0   0    2.40    1.10
   3   0   0    1.10    1.60
   3   0   0    5.10    1.20
  -3   0   0    5.60    1.80
  -3   0   0    4.50    1.20
   5   0   0   10.80    1.70
   5   0   0    9.80    2.50
  -5   0   0   10.10    2.30
   6   0   0   41.70    3.50
   6   0   0   32.70    3.00
   6   0   0   28.80    1.70
  -6   0   0   32.90    3.10
   7   0   0   11.00    2.40
   7   0   0   12.50    2.10
  -7   0   0    9.50    2.00
  -7   0   0    5.80    2.70
  -7   0   0    9.50    1.70
  -7   0   0    7.80    1.90
   7   0   0   11.20    3.10
   8   0   0  921.41   44.70
   8   0   0  852.01   45.40
   8   0   0  825.92   45.20
  -8   0   0  935.61   45.00
  -8   0   0  995.80   45.10
  -8   0   0  852.91   44.30
   9   0   0    5.30    3.20
   9   0   0    3.80    2.40
  -9   0   0   16.50    3.00
   9   0   0    3.70    2.00
  -9   0   0    5.40    1.70
   9   0   0    2.80    2.10
  -9   0   0    5.00    2.00
 -10   0   0   64.79    5.50
  10   0   0   38.40    5.90
  10   0   0   57.19    6.00
 -10   0   0   55.09    5.10
  10   0   0   63.69    5.30
 -10   0   0   65.69    4.70
 -11   0   0   26.80    4.00
 -11   0   0   38.80    4.30
  11   0   0   26.30    4.50
  11   0   0   35.90    4.80
  12   0   0 1477.05   75.59
  12   0   0 1336.97   76.19
  12   0   0 1572.04   76.09
  12   0   0 1608.54   74.69
 -12   0   0 1505.05   74.69
 -12   0   0 1502.35   73.89
  13   0   0   33.60    5.20
 -13   0   0   25.50    3.80
  13   0   0   28.70    4.30
  13   0   0   30.60    6.30
  13   0   0   23.10    5.00
 -13   0   0   17.10    3.80
  14   0   0  532.95   26.70
 -14   0   0  485.35   26.90
  14   0   0  481.15   27.80
  14   0   0  494.25   28.10
  14   0   0  445.06   28.70
 -14   0   0  477.75   26.30
 -14   0   0  506.05   25.60
  15   0   0    8.70    5.50
  15   0   0    9.10    4.20
 -15   0   0    8.00    2.90
 -15   0   0    8.30    2.60
  15   0   0    5.30    4.10
 -15   0   0    1.60    2.70
  16   0   0   49.40    6.20
  16   0   0   45.80    7.20
 -16   0   0   50.69    6.50
 -16   0   0   50.29    7.00
  16   0   0   38.70    8.10
 -16   0   0   42.00    4.60
 -17   0   0   -3.50    2.20
  17   0   0   -1.30    3.90
  17   0   0   -3.30    3.60
 -17   0   0    2.60    2.20
  17   0   0    1.90    3.60
 -17   0   0    1.70    2.90
  17   0   0    2.50    5.40
  18   0   0   61.99    7.10
 -18   0   0   61.39    4.80
 -18   0   0   56.09    5.90
  18   0   0   69.59    9.30
  18   0   0   57.49   10.00
  19   0   0   -0.30    3.10
  19   0   0    1.90    4.50
  19   0   0   -6.80    5.60
  20   0   0 1008.30   54.79
  20   0   0 1011.60   52.79
  20   0   0 1034.30   57.29
  21   0   0   -1.10    3.40
  21   0   0    1.80    5.00
  21   0   0   -2.80    6.20
  22   0   0  152.58   17.40
  22   0   0  135.79   13.20
  22   0   0  143.89   11.50
  23   0   0   -7.10    8.70
  23   0   0   11.20    4.30
  23   0   0    2.30    4.10
   3  -1   0 2370.86  113.99
  -3  -1   0 2412.06  113.89
   3  -1   0 2258.67  113.99
   3  -1   0 2397.96  114.49
   3   1   0 2343.57  113.99
  -4  -1   0 1491.85   69.79
   4  -1   0 1353.96   70.39
  -4  -1   0 1311.47   69.59
  -4  -1   0 1570.84   70.49
   4  -1   0 1352.96   69.89
   4  -1   0 1446.76   69.89
   4  -1   0 1361.76   69.89
  -4  -1   0 1539.75   69.59
  -4   1   0 1587.44   69.99
   4   1   0 1441.76   69.49
   4   1   0 1323.67   69.19
   4   1   0 1414.86   70.19
  -4   1   0 1545.85   69.99
   4   1   0 1332.97   69.79
  -5  -1   0  352.96   18.90
   5  -1   0  326.47   19.80
  -5  -1   0  402.06   19.00
   5  -1   0  392.36   19.20
   5  -1   0  366.46   19.40
  -5  -1   0  398.56   20.00
   5  -1   0  362.56   19.30
  -5  -1   0  383.66   19.20
  -5   1   0  409.76   19.30
   5   1   0  345.77   18.40
   5   1   0  379.46   18.80
   5   1   0  350.56   19.70
   5   1   0  352.56   19.20
  -5   1   0  421.06   19.40
   6  -1   0  701.53   38.00
  -6  -1   0  801.92   37.90
  -6  -1   0  746.03   37.50
   6  -1   0  760.52   37.90
  -6  -1   0  841.82   39.00
   6  -1   0  664.03   38.50
   6  -1   0  737.43   38.10
  -6  -1   0  823.72   37.70
   6   1   0  747.13   38.00
   6   1   0  741.63   36.90
   6   1   0  775.22   37.50
  -6   1   0  807.42   38.00
   6   1   0  681.23   38.40
  -6   1   0  791.02   37.90
   7  -1   0  381.06   19.50
   7  -1   0  349.17   19.70
  -7  -1   0  386.76   20.70
  -7  -1   0  388.76   19.30
   7  -1   0  360.76   19.80
  -7  -1   0  385.06   19.40
  -7  -1   0  364.76   19.10
  -7   1   0  390.36   19.60
   7   1   0  355.16   19.60
  -7   1   0  375.36   19.50
   7   1   0  386.96   19.10
   7   1   0  317.47   20.00
   7   1   0  368.76   18.30
   8  -1   0 5806.02  299.47
  -8  -1   0 6986.10  300.17
   8  -1   0 6061.39  298.87
   8  -1   0 6128.79  298.87
   8   1   0 5904.91  299.37
   8   1   0 6168.48  298.77
  -9  -1   0   14.10    2.50
  -9  -1   0   29.20    3.60
   9  -1   0   28.60    3.60
   9  -1   0   24.70    3.80
  -9  -1   0   23.60    3.30
  -9  -1   0   18.30    4.30
   9  -1   0   17.50    3.40
   9  -1   0   17.50    4.10
   9   1   0   16.20    3.10
  -9   1   0   20.30    2.60
   9   1   0   20.30    1.50
   9   1   0   18.20    4.20
  -9   1   0   24.10    3.30
   9   1   0   27.40    3.20
 -10  -1   0 1157.18   54.89
  10  -1   0 1167.38   54.99
  10  -1   0  953.10   56.29
  10  -1   0 1092.39   55.59
 -10  -1   0 1151.58   54.89
  10  -1   0 1002.80   55.39
 -10  -1   0 1096.29   54.39
 -10   1   0 1120.99   54.09
  10   1   0 1159.78   54.59
 -10   1   0 1144.09   54.99
 -10   1   0 1172.08   55.29
  10   1   0  955.70   55.79
  10   1   0 1058.39   55.39
 -11  -1   0   22.90    3.20
  11  -1   0   24.40    3.80
 -11  -1   0   22.40    3.50
  11  -1   0   12.20    5.10
  11  -1   0   12.70    4.40
 -11  -1   0   20.20    3.30
  11  -1   0   22.70    4.30
  11   1   0   23.30    4.50
  11   1   0   22.50    3.30
  11   1   0   14.90    4.40
 -11   1   0   19.40    3.40
 -11   1   0   23.70    2.90
  11   1   0   14.80    3.60
  12  -1   0  482.35   27.60
 -12  -1   0  505.45   26.00
 -12  -1   0  501.95   26.50
 -12  -1   0  509.45   26.70
  12  -1   0  454.15   28.50
  12  -1   0  525.65   26.80
  12  -1   0  521.05   27.90
 -12   1   0  491.35   25.70
 -12   1   0  542.75   26.90
 -12   1   0  526.65   27.20
  12   1   0  473.45   27.40
  12   1   0  510.25   26.30
  12   1   0  448.56   28.20
  12   1   0  486.95   27.80
  13  -1   0  701.73   35.30
 -13  -1   0  671.83   34.90
  13  -1   0  652.33   36.20
  13  -1   0  682.83   36.40
 -13  -1   0  677.83   34.50
 -13  -1   0  738.93   36.70
  13  -1   0  604.14   37.10
  13   1   0  716.13   35.00
 -13   1   0  659.73   35.10
 -13   1   0  647.84   35.60
  13   1   0  684.23   36.20
 -13   1   0  683.03   34.10
  13   1   0  683.83   36.70
  13   1   0  616.34   37.00
  14  -1   0  304.47   19.80
 -14  -1   0  337.27   17.90
  14  -1   0  300.67   19.80
  14  -1   0  348.57   20.20
 -14  -1   0  318.57   18.80
  14  -1   0  291.77   20.90
 -14  -1   0  322.87   18.30
 -14   1   0  330.17   19.30
  14   1   0  339.37   20.00
 -14   1   0  308.97   18.40
  14   1   0  316.37   21.10
 -14   1   0  330.27   17.40
  14   1   0  339.77   20.30
  14   1   0  337.77   18.40
 -15  -1   0  331.57   18.70
  15  -1   0  333.67   22.70
  15  -1   0  338.87   21.20
  15  -1   0  354.06   21.40
 -15  -1   0  315.17   19.10
 -15  -1   0  327.37   19.80
  15  -1   0  373.46   20.20
  15   1   0  341.37   22.40
 -15   1   0  335.77   19.50
 -15   1   0  342.17   20.30
  15   1   0  363.96   21.70
 -15   1   0  348.67   18.30
  15   1   0  349.07   19.50
  15   1   0  357.16   21.10
  16  -1   0  292.67   18.90
 -16  -1   0  283.57   16.60
  16  -1   0  302.57   19.10
 -16  -1   0  305.07   17.60
  16  -1   0  266.17   20.30
 -16  -1   0  301.67   16.20
  16  -1   0  309.07   17.70
  16   1   0  284.57   18.70
 -16   1   0  285.87   15.50
 -16   1   0  242.78   18.30
  16   1   0  293.27   19.10
 -16   1   0  267.97   17.60
  16   1   0  279.57   20.00
  17  -1   0   89.59   10.10
 -17  -1   0   82.89    7.40
  17  -1   0   95.39    9.80
 -17  -1   0   95.79    7.10
  17  -1   0   67.29   10.70
  17  -1   0   92.39    8.70
 -17   1   0  100.39    6.40
 -17   1   0  110.89    9.20
  17   1   0   86.89    9.80
 -17   1   0   92.69    7.80
  17   1   0  112.29    8.50
  17   1   0  110.99   10.50
  17   1   0  108.59   11.90
  18  -1   0   90.09   10.40
  18  -1   0  107.99    9.00
 -18  -1   0   82.99    6.20
  18  -1   0   86.29    9.80
 -18  -1   0   78.79    7.00
  18  -1   0   64.49   11.40
  18   1   0  105.79   10.40
  18   1   0   88.49    8.00
 -18   1   0   79.19    5.10
  18   1   0   85.09   11.40
 -18   1   0  101.99    9.30
 -18   1   0   85.69    5.30
  19  -1   0    2.60    4.70
  19  -1   0    8.70    6.90
 -19  -1   0    2.00    1.30
  19  -1   0    0.00    3.70
  19   1   0   -6.00    6.10
  19   1   0   -1.10    3.90
  19   1   0    4.30    3.50
  20  -1   0   32.40    8.90
  20  -1   0   35.00    5.90
  20  -1   0   32.40    6.70
  20   1   0   28.80    9.00
  20   1   0   24.80    4.70
  20   1   0   33.30    7.00
  21  -1   0   10.10    7.80
  21  -1   0    5.00    4.30
  21  -1   0    7.60    5.20
  21   1   0    2.50    4.50
  21   1   0    7.00    7.60
  21   1   0    0.80    3.30
  22  -1   0   14.30    5.80
  22  -1   0    8.10    4.70
  22  -1   0    9.00    8.30
  22   1   0   19.00    6.00
  22   1   0   15.50    7.90
  22   1   0   15.30    8.60
  22   1   0   25.40    4.80
  23  -1   0   11.10    4.80
  23  -1   0   10.90    5.10
  23   1   0    8.20    4.50
  23   1   0    9.10    8.30
  23   1   0    6.90   10.70
  -1   2   0  255.27   13.20
  -1   2   0  271.27   13.20
   2  -2   0  883.01   44.60
  -2  -2   0  860.51   44.50
  -2  -2   0  958.70   44.50
  -2  -2   0  955.40   44.50
   2  -2   0  928.01   44.60
   2  -2   0  935.51   44.20
   2  -2   0  871.31   44.40
   2   2   0  882.01   44.40
   2   2   0  820.42   44.80
  -2   2   0  921.31   44.60
  -2   2   0  998.60   44.40
   2   2   0  917.01   44.50
   2   2   0  936.31   44.60
  -2   2   0  991.70   44.20
  -2   2   0  844.82   44.30
   2   2   0  862.41   44.50
  -2   2   0  944.11   44.60
   4  -2   0 4009.60  200.28
   4  -2   0 4070.89  199.58
   4   2   0 4317.47  199.68
  -5  -2   0 2533.25  111.09
   5  -2   0 2160.58  111.69
   5  -2   0 2121.69  111.49
  -5  -2   0 2407.26  111.49
   5  -2   0 2030.90  112.09
  -5  -2   0 2157.58  111.29
  -5  -2   0 2485.35  112.19
   5  -2   0 2323.27  111.59
   5   2   0 2138.59  110.89
   5   2   0 2255.87  111.59
   5   2   0 2325.17  110.89
   5   2   0 2271.47  111.89
  -5   2   0 2413.16  111.69
  -5   2   0 2509.15  111.79
   6  -2   0 1268.77   68.69
  -6  -2   0 1325.27   67.59
   6  -2   0 1227.88   67.79
  -6  -2   0 1494.65   67.89
   6  -2   0 1396.66   67.99
   6  -2   0 1242.88   67.99
  -6  -2   0 1553.24   68.79
  -6  -2   0 1517.25   67.39
  -6   2   0 1432.66   67.99
   6   2   0 1383.26   67.19
  -6   2   0 1426.56   68.09
   6   2   0 1375.66   68.39
   6   2   0 1382.56   67.99
   6   2   0 1319.87   66.99
   7  -2   0 1968.10   99.39
   7  -2   0 2083.59   99.29
   7  -2   0 1879.11   99.39
   7  -2   0 1825.72   99.99
  -7  -2   0 2189.58   99.19
  -7  -2   0 2018.00   98.89
  -7  -2   0 1987.40   98.69
  -7  -2   0 2169.48  100.29
  -7   2   0 2180.08   99.49
   7   2   0 1966.90   98.19
  -7   2   0 2189.48   99.39
   7   2   0 1942.71   99.29
   7   2   0 2061.79   98.49
   7   2   0 1950.20   99.79
   8  -2   0  859.91   49.80
   8  -2   0  898.81   49.20
  -8  -2   0 1065.09   48.90
   8  -2   0  943.21   48.90
   8  -2   0  926.81   49.10
  -8  -2   0 1000.70   48.60
  -8  -2   0 1037.90   48.50
  -8  -2   0 1039.40   50.29
  -8   2   0 1036.10   49.20
   8   2   0 1044.30   48.30
   8   2   0  945.81   49.10
  -8   2   0 1001.40   49.00
   8   2   0 1016.70   47.70
   8   2   0  848.62   49.40
   9  -2   0  335.87   20.00
   9  -2   0  323.07   20.80
  -9  -2   0  370.96   19.20
  -9  -2   0  387.76   19.20
  -9  -2   0  380.26   21.10
  -9  -2   0  385.86   19.50
   9  -2   0  353.36   20.00
   9  -2   0  377.26   19.70
  -9   2   0  368.06   20.00
   9   2   0  297.17   20.20
   9   2   0  392.56   19.00
   9   2   0  381.06   18.20
   9   2   0  325.07   19.70
  -9   2   0  388.06   20.70
 -10  -2   0  635.44   31.60
  10  -2   0  622.24   32.60
 -10  -2   0  651.93   31.90
 -10  -2   0  599.84   31.50
  10  -2   0  624.24   32.10
 -10  -2   0  642.64   33.90
  10  -2   0  507.15   32.30
  10   2   0  547.75   32.90
 -10   2   0  653.23   32.70
  10   2   0  651.33   31.40
  10   2   0  642.14   30.40
 -10   2   0  643.54   32.10
  10   2   0  604.34   32.40
 -11  -2   0  203.28   11.80
  11  -2   0  205.78   12.30
  11  -2   0  188.88   12.70
  11  -2   0  166.78   13.80
 -11  -2   0  199.28   11.70
  11  -2   0  189.08   14.00
 -11  -2   0  196.28   11.50
 -11   2   0  204.88   12.10
  11   2   0  175.48   12.40
 -11   2   0  203.48   12.50
  11   2   0  207.78   11.40
 -11   2   0  203.48   11.00
  11   2   0  200.08    9.90
  11   2   0  170.88   13.10
  12  -2   0 1850.01   95.29
  12  -2   0 1925.41   95.39
  12  -2   0 2004.90   94.69
  12  -2   0 1811.62   96.29
 -12  -2   0 1912.11   94.09
 -12  -2   0 1954.20   93.89
 -12  -2   0 1936.21   94.19
  12   2   0 1907.81   95.69
  12   2   0 1764.12   95.79
  12   2   0 1971.00   93.79
 -12   2   0 1937.11   94.49
 -12   2   0 1970.30   95.09
  12   2   0 1912.81   95.19
 -12   2   0 1872.01   93.19
  13  -2   0  286.57   18.30
 -13  -2   0  291.17   16.80
  13  -2   0  286.67   18.50
 -13  -2   0  296.37   17.20
  13  -2   0  267.37   19.60
  13  -2   0  319.47   17.90
 -13  -2   0  318.67   17.20
  13   2   0  325.97   16.90
  13   2   0  323.17   18.60
  13   2   0  321.17   19.10
 -13   2   0  301.27   17.40
 -13   2   0  299.67   18.00
  13   2   0  270.27   19.00
 -13   2   0  293.77   16.10
  14  -2   0   75.39    7.30
 -14  -2   0   51.19    5.60
 -14  -2   0   64.19    9.10
  14  -2   0   58.99    7.80
 -14  -2   0   60.89    6.00
  14  -2   0   44.50    8.40
  14  -2   0   53.89    7.10
  14   2   0   57.99    5.90
  14   2   0   51.59    7.20
 -14   2   0   62.89    6.30
  14   2   0   56.39    7.90
 -14   2   0   56.69    5.20
  14   2   0   49.80    7.80
 -14   2   0   72.79    7.30
 -15  -2   0  628.94   33.60
  15  -2   0  661.93   35.80
  15  -2   0  664.03   34.60
 -15  -2   0  679.03   33.50
 -15  -2   0  623.74   34.00
  15  -2   0  672.03   36.00
  15  -2   0  620.24   37.10
 -15   2   0  615.94   34.00
  15   2   0  708.03   33.80
 -15   2   0  607.24   34.90
  15   2   0  598.04   36.40
 -15   2   0  627.34   32.50
  15   2   0  696.73   35.70
  15   2   0  618.94   36.00
  16  -2   0   30.30    6.40
  16  -2   0   27.60    6.00
  16  -2   0   29.80    5.50
 -16  -2   0   25.20    4.10
 -16  -2   0   30.30    4.40
  16  -2   0   17.80    6.90
 -16   2   0   35.80    3.70
  16   2   0   28.70    7.20
 -16   2   0   32.20    4.80
  16   2   0   38.30    6.50
  16   2   0   28.70    4.60
  16   2   0   32.80    6.70
 -16   2   0   31.00    5.80
  17  -2   0  243.18   16.90
  17  -2   0  240.78   16.90
  17  -2   0  252.67   15.70
  17  -2   0  251.27   19.30
 -17  -2   0  235.28   13.90
 -17  -2   0  232.58   14.30
  17   2   0  241.08   15.70
  17   2   0  263.07   17.00
 -17   2   0  235.08   12.60
 -17   2   0  223.58   14.50
  17   2   0  224.48   18.80
 -17   2   0  226.08   16.00
  17   2   0  233.18   18.00
 -17   2   0  231.18   12.50
  18  -2   0  274.57   18.40
  18  -2   0  255.37   16.60
 -18  -2   0  246.78   14.90
 -18  -2   0  250.57   14.60
  18  -2   0  236.38   17.50
  18   2   0  258.87   19.60
 -18   2   0  269.07   17.20
  18   2   0  239.98   15.30
  18   2   0  282.47   18.10
 -19  -2   0  145.09   10.20
  19  -2   0  200.18   17.40
  19  -2   0  186.48   14.90
  19  -2   0  195.48   13.50
 -19  -2   0  180.28   11.20
 -19  -2   0  188.88   11.20
 -19   2   0  169.78   13.60
  19   2   0  172.88   16.40
  19   2   0  194.48   12.30
  19   2   0  182.48   14.40
  20  -2   0  450.45   26.40
  20  -2   0  456.55   27.90
  20  -2   0  450.95   30.20
  20   2   0  471.15   27.60
  20   2   0  407.66   29.30
  20   2   0  454.35   25.10
  21  -2   0  169.18   15.20
  21  -2   0  177.08   18.20
  21  -2   0  198.28   14.40
  21   2   0  180.98   17.30
  21   2   0  228.68   21.00
  21   2   0  196.38   14.90
  21   2   0  178.38   12.60
  22  -2   0  642.44   35.60
  22  -2   0  647.94   40.20
  22  -2   0  620.84   36.90
  22   2   0  602.04   36.30
  22   2   0  649.83   39.40
  22   2   0  644.04   42.40
  23  -2   0    8.30    4.60
  23  -2   0    9.00   10.60
  23  -2   0   10.40    5.10
  23   2   0   11.70   10.10
  23   2   0    7.00    9.80
  23   2   0   10.70    4.70
   0  -3   0    1.30    0.80
   0  -3   0    1.90    0.80
   0  -3   0    1.50    0.90
   0  -3   0    5.50    0.80
   0  -3   0    2.00    1.00
   0   3   0    1.30    0.70
   0   3   0    2.60    0.80
   0   3   0    1.40    0.50
   0   3   0    2.10    0.80
   0   3   0    1.80    1.00
   0   3   0    1.40    0.90
  -2  -3   0 1568.74   79.29
   2  -3   0 1571.74   79.09
   2  -3   0 1577.44   79.19
   2  -3   0 1623.64   79.39
   2  -3   0 1510.25   79.39
  -2  -3   0 1575.84   79.39
  -2  -3   0 1804.12   79.49
  -2  -3   0 1753.42   79.79
   2  -3   0 1660.83   79.79
   2   3   0 1515.85   79.59
   2   3   0 1724.73   79.49
  -2   3   0 1680.73   79.19
   2   3   0 1622.44   79.19
   2   3   0 1650.93   79.19
  -2   3   0 1554.54   79.09
   2   3   0 1659.23   79.39
  -2   3   0 1721.93   79.49
   4  -3   0 1159.08   57.49
  -4  -3   0 1086.69   57.29
   4  -3   0 1138.09   57.59
  -4  -3   0 1255.17   56.49
  -4  -3   0 1192.68   57.29
  -4  -3   0 1251.27   57.59
   4  -3   0 1076.29   57.09
  -4   3   0 1052.29   57.09
  -4   3   0 1254.57   57.59
   4   3   0 1078.99   57.99
   4   3   0 1109.59   57.29
   4   3   0 1093.69   56.99
  -4   3   0 1296.07   57.69
  -4   3   0 1287.07   57.09
   4   3   0 1138.79   57.39
  -4   3   0 1298.37   56.69
   4   3   0 1109.19   56.39
   4   3   0 1166.28   57.49
   5  -3   0  471.85   25.70
   5  -3   0  564.34   25.90
  -5  -3   0  500.05   25.90
  -5  -3   0  532.05   25.50
  -5  -3   0  521.95   24.70
   5  -3   0  462.45   25.30
  -5  -3   0  483.15   25.40
  -5   3   0  535.35   24.60
   5   3   0  472.95   25.50
   5   3   0  486.65   25.50
   5   3   0  500.45   25.00
  -5   3   0  501.35   25.60
   5   3   0  460.95   25.60
  -5   3   0  547.95   25.90
   5   3   0  491.75   24.60
   6  -3   0  296.57   16.50
  -6  -3   0  306.07   16.80
  -6  -3   0  303.87   15.50
  -6  -3   0  292.77   16.10
   6  -3   0  305.07   16.40
   6  -3   0  307.97   16.30
  -6  -3   0  302.77   16.10
   6   3   0  296.87   16.30
   6   3   0  294.37   15.30
  -6   3   0  332.97   15.10
   6   3   0  282.27   15.50
  -6   3   0  328.97   16.50
   6   3   0  296.77   16.60
  -6   3   0  321.47   16.60
   7  -3   0  820.82   44.40
  -7  -3   0  924.91   43.40
  -7  -3   0  910.31   44.00
   7  -3   0  817.42   45.10
  -7  -3   0  928.91   44.10
  -7  -3   0  913.91   45.00
   7  -3   0  892.11   44.30
   7  -3   0  822.42   44.10
   7   3   0  864.41   43.30
  -7   3   0  907.41   44.30
   7   3   0  901.91   43.20
  -7   3   0  923.41   44.50
   7   3   0  839.92   44.50
   7   3   0  857.31   44.20
  -8  -3   0  273.87   14.70
   8  -3   0  276.37   15.10
  -8  -3   0  278.07   16.00
  -8  -3   0  267.77   14.10
   8  -3   0  258.37   15.00
  -8  -3   0  262.47   14.60
   8  -3   0  243.88   15.20
   8   3   0  269.17   13.90
  -8   3   0  285.67   15.10
   8   3   0  236.98   15.30
   8   3   0  247.78   15.00
   8   3   0  273.57   13.80
  -8   3   0  283.37   15.30
   9  -3   0  498.15   27.70
   9  -3   0  479.35   27.90
   9  -3   0  501.25   27.60
  -9  -3   0  546.35   28.90
   9  -3   0  497.75   28.90
  -9  -3   0  538.15   27.30
  -9  -3   0  547.15   27.30
  -9  -3   0  559.64   26.80
  -9   3   0  549.95   28.00
   9   3   0  563.04   26.30
   9   3   0  553.64   26.50
  -9   3   0  524.45   27.60
   9   3   0  463.05   28.00
   9   3   0  522.45   27.80
  10  -3   0  118.29   10.30
  10  -3   0  101.59    8.70
 -10  -3   0  114.89    7.40
 -10  -3   0  113.29    7.80
 -10  -3   0  119.19    9.80
  10  -3   0  111.19    8.40
 -10  -3   0  109.89    7.70
  10  -3   0  120.99    8.50
  10   3   0  110.29    8.60
 -10   3   0  123.79    8.30
  10   3   0  124.89    7.20
  10   3   0  118.29    6.70
  10   3   0   97.79    9.10
 -10   3   0  135.19    9.00
 -11  -3   0  197.48   11.40
 -11  -3   0  195.38   13.90
  11  -3   0  184.68   14.00
 -11  -3   0  196.48   11.70
  11  -3   0  184.78   12.90
  11  -3   0  197.28   12.40
 -11  -3   0  203.18   11.80
  11   3   0  193.08   10.30
  11   3   0  201.18   11.10
  11   3   0  186.68   12.70
 -11   3   0  192.78   12.60
 -11   3   0  208.58   12.20
  11   3   0  173.38   13.10
 -12  -3   0  515.85   26.90
  12  -3   0  498.85   28.50
 -12  -3   0  543.45   27.20
  12  -3   0  459.75   29.20
  12  -3   0  541.15   27.90
 -12  -3   0  515.55   27.10
  12  -3   0  520.65   28.30
 -12   3   0  471.35   26.10
  12   3   0  487.35   28.80
  12   3   0  532.55   25.50
  12   3   0  532.05   28.30
 -12   3   0  503.15   27.50
  12   3   0  527.65   26.50
 -12   3   0  532.45   28.30
 -13  -3   0   53.29    5.60
 -13  -3   0   69.49    6.20
  13  -3   0   56.09    8.70
 -13  -3   0   60.99    5.60
  13  -3   0   54.39    7.00
  13  -3   0   63.79    7.10
  13  -3   0   62.59    7.00
  13   3   0   57.89    7.20
 -13   3   0   56.69    4.70
  13   3   0   50.39    7.40
  13   3   0   59.49    5.40
 -13   3   0   54.19    6.10
 -13   3   0   77.19    7.30
  13   3   0   59.59    8.00
 -14  -3   0 3338.27  164.68
  14  -3   0 3579.34  165.68
  14  -3   0 3476.45  166.38
  14  -3   0 3474.95  166.68
  14  -3   0 3244.08  167.68
 -14  -3   0 3481.35  164.78
 -14  -3   0 3159.88  164.58
  14   3   0 3457.85  166.18
  14   3   0 3504.25  164.18
  14   3   0 3238.68  166.88
 -14   3   0 3293.17  165.98
  14   3   0 3396.86  166.98
 -14   3   0 3466.05  163.58
 -14   3   0 3118.59  164.98
  15  -3   0   57.29    7.90
 -15  -3   0   67.79    6.10
 -15  -3   0   66.89    6.60
  15  -3   0   73.69    8.50
  15  -3   0   81.69    8.00
  15  -3   0   46.90    8.90
 -15   3   0   64.99    6.70
 -15   3   0   64.59    5.10
  15   3   0   73.59    6.20
 -15   3   0   69.19    7.80
  15   3   0   66.09    9.30
 -15   3   0   65.09    5.00
  15   3   0   76.49    8.30
 -16  -3   0  222.58   13.90
 -16  -3   0  223.28   13.60
  16  -3   0  236.68   15.40
  16  -3   0  198.08   17.60
  16  -3   0  212.18   15.60
  16  -3   0  247.28   16.70
  16   3   0  242.98   13.80
  16   3   0  220.38   17.20
 -16   3   0  223.88   15.60
 -16   3   0  216.08   14.20
 -16   3   0  232.38   12.30
  16   3   0  257.97   16.30
 -16   3   0  233.38   12.40
  16   3   0  241.08   16.70
  17  -3   0  173.98   13.60
  17  -3   0  172.08   12.20
 -17  -3   0  147.89   10.30
 -17  -3   0  157.38   10.30
 -17  -3   0  150.58   11.70
  17  -3   0  157.58   15.20
 -17   3   0  145.19   12.00
  17   3   0  174.68   14.50
 -17   3   0  127.19   10.50
  17   3   0  162.78   10.40
  17   3   0  154.28   12.60
 -18  -3   0   67.19    6.30
 -18  -3   0   69.59    6.30
  18  -3   0   60.79    8.40
  18  -3   0   74.49    9.60
 -18  -3   0   64.89    6.00
  18  -3   0   85.39    8.80
  18  -3   0   46.00   13.00
 -18   3   0   70.69    8.70
  18   3   0   55.29    9.90
  18   3   0   75.49    6.80
  18   3   0   81.79    9.70
 -19  -3   0   44.30    4.70
  19  -3   0   42.80    9.90
 -19  -3   0   41.50    4.70
 -19  -3   0   48.20    4.70
  19  -3   0   47.70    7.50
  19  -3   0   37.00    9.80
  19   3   0   43.90    7.60
  19   3   0   40.80   10.60
  19   3   0   44.70    9.40
  20  -3   0    7.80    4.80
  20  -3   0    7.80    7.70
  20  -3   0   12.60    5.70
 -20  -3   0    6.40    2.60
 -20  -3   0    5.70    3.00
  20   3   0   12.20    3.60
  20   3   0    6.80    4.50
  20   3   0   -4.50    5.90
  20   3   0   11.10    8.70
  21  -3   0   40.60    7.90
  21  -3   0   30.80    6.30
  21  -3   0   29.40    9.40
  21   3   0   30.20   10.40
  21   3   0   28.90    6.40
  21   3   0   21.80    8.10
  22  -3   0  164.68   17.70
  22  -3   0  137.49   13.50
  22  -3   0  144.49   12.90
  22   3   0  172.78   17.10
  22   3   0  157.08   13.70
  22   3   0  122.69   17.50
  23  -3   0    2.50    8.50
  23  -3   0   15.30    5.50
  23  -3   0   11.10    5.30
  23   3   0   11.30    4.80
  23   3   0    7.60    9.10
  23   3   0   17.20   10.40
   0  -4   0  693.03   33.50
   0  -4   0  628.54   33.00
   0  -4   0  669.33   33.40
   0  -4   0  711.73   33.60
   0  -4   0  675.13   33.60
   0   4   0  690.43   33.10
   0   4   0  716.73   33.50
   0   4   0  691.73   33.50
   0   4   0  631.84   33.40
   0   4   0  701.83   33.30
   0   4   0  599.44   33.50
   1  -4   0  257.27   13.60
  -1  -4   0  244.48   13.70
  -1  -4   0  272.07   13.80
   1  -4   0  267.37   13.90
  -1  -4   0  272.17   13.00
   1  -4   0  244.88   13.70
  -1  -4   0  281.47   13.20
  -1  -4   0  295.57   13.90
  -1  -4   0  246.08   13.60
   1  -4   0  253.47   13.40
   1  -4   0  275.17   13.90
   1  -4   0  222.88   13.30
   1   4   0  241.68   13.70
   1   4   0  268.17   13.30
  -1   4   0  234.88   13.80
   1   4   0  273.47   13.70
   1   4   0  239.08   12.90
   1   4   0  274.47   13.70
   1   4   0  258.97   13.40
  -1   4   0  283.47   13.40
  -1   4   0  267.87   13.60
  -1   4   0  249.08   13.40
  -1   4   0  257.27   13.40
  -1   4   0  267.77   13.70
  -1   4   0  250.27   13.80
   2  -4   0 3398.36  165.48
  -2  -4   0 3272.67  165.78
   2  -4   0 3499.75  166.08
   2   4   0 3537.85  165.88
   2   4   0 3497.55  166.08
  -2   4   0 3331.07  165.38
  -2   4   0 3447.76  166.18
   3  -4   0 2793.22  137.09
   3  -4   0 2998.60  136.89
   3  -4   0 2701.53  136.69
   3  -4   0 3143.49  137.79
  -3  -4   0 2898.81  136.99
  -3  -4   0 3067.89  137.69
  -3  -4   0 2767.02  137.09
   3  -4   0 2630.94  137.09
   3   4   0 2854.41  137.09
   3   4   0 2764.12  136.99
  -3   4   0 2591.14  136.59
   3   4   0 2720.43  137.49
   3   4   0 2825.32  136.79
   4  -4   0   58.89    4.40
  -4  -4   0   47.00    4.10
  -4  -4   0   57.09    4.00
   4  -4   0   43.60    4.20
  -4  -4   0   52.49    4.00
  -4  -4   0   52.49    4.00
   4  -4   0   49.40    3.70
  -4   4   0   60.39    4.40
  -4   4   0   53.99    3.70
   4   4   0   52.09    3.70
   4   4   0   46.20    3.90
  -4   4   0   55.29    4.30
   4   4   0   60.59    5.10
   4   4   0   52.09    4.10
  -4   4   0   53.49    3.70
   4   4   0   49.20    4.10
  -4   4   0   59.69    3.40
  -5  -4   0 1743.43   84.39
  -5  -4   0 1686.33   84.29
   5  -4   0 1573.64   84.59
   5  -4   0 1606.44   84.09
  -5  -4   0 1815.62   84.29
  -5  -4   0 1792.32   84.59
   5  -4   0 1715.03   84.59
  -5   4   0 1868.81   84.69
   5   4   0 1615.34   84.29
   5   4   0 1675.73   83.89
  -5   4   0 1617.44   83.99
   5   4   0 1659.43   84.39
  -5   4   0 1854.21   83.99
  -5   4   0 1864.31   83.59
   5   4   0 1719.63   84.39
  -5   4   0 1848.42   84.79
   5   4   0 1669.33   83.09
   6  -4   0 2578.74  135.49
   6  -4   0 2551.74  134.29
   6  -4   0 2660.53  134.89
  -6  -4   0 2916.11  134.49
  -6  -4   0 2880.81  134.59
  -6  -4   0 2926.21  133.49
  -6  -4   0 2941.71  135.09
   6  -4   0 2682.33  134.69
  -6   4   0 2941.71  134.89
   6   4   0 2683.03  133.99
  -6   4   0 2854.71  134.09
   6   4   0 2812.52  133.29
   6   4   0 2664.63  134.59
   6   4   0 2425.96  135.49
   6   4   0 2672.23  134.59
  -6   4   0 2941.41  133.49
  -6   4   0 2900.71  134.99
   6   4   0 2727.23  134.79
  -7  -4   0   44.60    4.60
  -7  -4   0   45.50    3.00
   7  -4   0   42.00    4.60
   7  -4   0   28.50    4.90
   7  -4   0   38.60    4.80
  -7  -4   0   36.40    4.20
  -7  -4   0   38.90    3.90
   7  -4   0   44.70    4.20
   7   4   0   37.60    2.80
  -7   4   0   49.10    4.90
   7   4   0   35.70    3.30
  -7   4   0   46.20    4.80
  -7   4   0   46.50    2.70
   7   4   0   38.30    4.50
   7   4   0   36.90    4.60
  -8  -4   0  575.64   30.40
  -8  -4   0  597.34   29.50
  -8  -4   0  591.24   28.50
   8  -4   0  512.85   29.80
  -8  -4   0  577.84   29.30
   8  -4   0  584.44   29.60
   8  -4   0  556.24   30.90
   8  -4   0  577.24   29.80
   8   4   0  509.85   29.80
   8   4   0  547.95   29.60
   8   4   0  558.84   28.60
  -8   4   0  592.84   30.70
   8   4   0  583.94   28.30
  -8   4   0  614.54   30.10
   9  -4   0  680.63   37.20
   9  -4   0  640.24   36.00
   9  -4   0  706.23   35.70
  -9  -4   0  673.83   35.30
   9  -4   0  721.83   35.90
  -9  -4   0  702.63   36.70
  -9  -4   0  671.03   36.10
  -9  -4   0  686.33   34.50
   9   4   0  721.63   34.50
   9   4   0  719.83   34.30
   9   4   0  665.33   35.70
  -9   4   0  757.72   36.40
   9   4   0  627.14   36.00
  -9   4   0  702.13   35.70
  10  -4   0 1421.36   70.19
 -10  -4   0 1404.36   69.69
 -10  -4   0 1438.66   69.69
 -10  -4   0 1440.86   71.39
 -10  -4   0 1438.56   68.99
  10  -4   0 1277.27   70.49
  10  -4   0 1477.75   70.39
  10  -4   0 1353.06   71.59
  10   4   0 1422.36   68.59
 -10   4   0 1435.56   70.59
  10   4   0 1307.27   70.59
  10   4   0 1419.86   68.69
 -10   4   0 1405.96   70.09
  10   4   0 1402.76   70.29
  11  -4   0  877.41   44.90
  11  -4   0  878.41   44.80
  11  -4   0  835.92   46.30
  11  -4   0  835.72   45.30
 -11  -4   0  865.61   44.20
 -11  -4   0  881.31   46.20
 -11  -4   0  882.71   43.50
 -11  -4   0  867.61   44.10
  11   4   0  755.82   45.10
  11   4   0  876.71   43.10
  11   4   0  897.41   43.00
 -11   4   0  924.81   45.40
 -11   4   0  908.41   44.70
  12  -4   0  358.46   21.70
 -12  -4   0  367.86   19.70
 -12  -4   0  354.06   21.80
  12  -4   0  357.06   20.40
 -12  -4   0  361.16   19.40
  12  -4   0  314.47   20.70
  12  -4   0  355.26   22.30
 -12  -4   0  356.06   18.90
 -12   4   0  334.07   18.40
  12   4   0  374.66   18.50
  12   4   0  332.87   21.10
  12   4   0  342.07   20.40
 -12   4   0  353.86   20.60
 -12   4   0  354.76   20.00
  12   4   0  346.77   18.10
 -13  -4   0  549.85   29.30
 -13  -4   0  554.94   29.70
  13  -4   0  588.34   30.50
  13  -4   0  532.85   32.20
  13  -4   0  548.95   31.20
  13  -4   0  576.24   30.80
  13   4   0  576.34   27.90
 -13   4   0  529.15   28.40
  13   4   0  564.94   31.50
 -13   4   0  564.94   30.90
  13   4   0  560.04   30.70
  13   4   0  576.04   28.60
 -13   4   0  546.25   28.30
 -13   4   0  553.74   30.00
  14  -4   0  499.55   26.00
 -14  -4   0  459.65   24.90
  14  -4   0  452.15   28.00
 -14  -4   0  456.75   24.50
  14  -4   0  448.96   26.00
  14  -4   0  439.86   26.60
  14   4   0  465.15   27.20
 -14   4   0  432.46   23.30
  14   4   0  468.95   23.90
  14   4   0  453.75   26.90
 -14   4   0  440.86   23.50
  14   4   0  490.45   26.30
 -14   4   0  435.06   25.20
 -14   4   0  455.15   26.10
  15  -4   0  391.66   22.40
 -15  -4   0  356.46   20.70
  15  -4   0  381.36   22.80
 -15  -4   0  407.56   21.50
  15  -4   0  380.56   25.00
  15  -4   0  368.86   23.30
 -15   4   0  367.66   19.60
 -15   4   0  355.26   22.60
 -15   4   0  364.06   22.90
 -15   4   0  387.26   19.50
  15   4   0  381.76   23.60
  15   4   0  379.86   23.80
  15   4   0  410.66   23.00
  15   4   0  379.86   20.40
 -16  -4   0   85.09    6.80
 -16  -4   0   83.59    7.10
  16  -4   0   86.19   11.60
  16  -4   0   93.29   10.10
  16  -4   0   83.99    9.00
  16  -4   0   96.69    9.30
 -16  -4   0   86.49    7.70
  16   4   0   96.69    6.90
 -16   4   0   86.69    5.40
  16   4   0  103.29    9.60
 -16   4   0   81.19    7.60
 -16   4   0   82.19    5.30
  16   4   0   77.79    9.70
  16   4   0   55.09   10.60
  16   4   0   95.99   11.30
 -17  -4   0   45.10    5.60
  17  -4   0   44.50    7.70
  17  -4   0   34.00    8.10
 -17  -4   0   38.20    5.00
  17  -4   0   32.90    6.30
  17  -4   0   41.70    6.70
  17   4   0   44.10    7.20
  17   4   0   42.40    8.00
  17   4   0   37.30    4.60
 -17   4   0   35.80    6.70
  17   4   0   18.40    8.30
 -18  -4   0   76.49    6.50
  18  -4   0   75.19   12.00
  18  -4   0   96.89    9.70
  18  -4   0   81.09    9.30
  18  -4   0   91.89   10.70
 -18  -4   0   83.49    7.40
 -18  -4   0   77.89    6.70
  18   4   0   91.49   14.50
  18   4   0   95.29    7.10
  18   4   0   89.89   11.80
  18   4   0   91.99   10.00
 -19  -4   0   15.70    3.10
  19  -4   0   20.00    5.50
  19  -4   0   17.10    8.30
  19  -4   0   24.50    6.80
 -19  -4   0   20.30    3.70
 -19  -4   0   18.80    3.10
  19  -4   0    4.90    7.10
  19   4   0    6.50    8.30
  19   4   0   22.40    7.40
  19   4   0   23.30    6.00
  19   4   0   20.70    3.60
  20  -4   0  165.68   13.60
  20  -4   0  172.08   15.10
  20  -4   0  190.18   18.00
  20   4   0  141.29   15.70
  20   4   0  174.58   14.20
  20   4   0  182.18   19.20
  21  -4   0  448.16   30.30
  21  -4   0  424.76   26.30
  21  -4   0  423.36   27.40
  21   4   0  430.06   31.90
  21   4   0  432.06   29.20
  21   4   0  428.86   26.50
  22  -4   0  222.38   20.30
  22  -4   0  280.17   19.30
  22  -4   0  263.97   21.40
  22   4   0  220.18   20.10
  22   4   0  246.68   17.80
  22   4   0  229.98   22.70
  23  -4   0    5.50    5.00
  23  -4   0    1.50    5.30
  23  -4   0   -9.30    8.00
  23   4   0    1.80    4.50
  23   4   0   -3.40    8.30
  23   4   0   13.40   10.10
   0  -5   0   44.20    4.00
   0   5   0   35.30    3.80
   0   5   0   34.50    3.70
  -1  -5   0  169.88   10.40
  -1  -5   0  192.68   10.70
   1  -5   0  207.08   10.80
   1  -5   0  180.08   10.20
   1  -5   0  187.28   10.90
   1  -5   0  177.18   10.60
  -1  -5   0  176.58   10.60
   1  -5   0  177.18   10.40
  -1  -5   0  189.68   10.70
  -1  -5   0  189.98   10.00
  -1  -5   0  174.28    9.60
  -1   5   0  205.68   10.20
  -1   5   0  185.18   10.30
  -1   5   0  182.58   10.90
  -1   5   0  203.18   10.30
   1   5   0  165.28   10.60
   1   5   0  184.08   10.50
   1   5   0  169.08   10.70
   1   5   0  174.18    9.70
  -1   5   0  202.88   10.70
  -1   5   0  225.58   10.70
  -1   5   0  175.78   10.70
   1   5   0  202.48   10.30
   1   5   0  202.08   10.60
   3  -5   0 2388.86  114.59
   3  -5   0 2244.78  114.69
  -3  -5   0 2543.35  114.89
  -3  -5   0 2331.67  114.89
  -3  -5   0 2268.37  114.69
   3  -5   0 2135.59  114.79
   3  -5   0 2520.65  115.39
   3  -5   0 2260.07  114.39
   3  -5   0 2308.87  115.19
  -3  -5   0 2516.95  114.39
  -3  -5   0 2426.36  115.29
   3   5   0 2358.76  114.89
   3   5   0 2284.67  114.79
  -3   5   0 2446.06  114.59
  -3   5   0 2629.54  114.99
   3   5   0 2405.96  114.39
  -3   5   0 2466.25  114.99
   3   5   0 2236.58  114.49
   3   5   0 2312.67  114.79
   3   5   0 2205.88  115.09
  -3   5   0 2249.97  114.29
  -4  -5   0  418.66   21.20
  -4  -5   0  408.06   22.10
   4  -5   0  401.96   21.00
  -4  -5   0  388.46   21.20
   4  -5   0  392.06   21.60
  -4  -5   0  390.76   21.50
  -4  -5   0  428.56   21.40
   4  -5   0  441.96   22.30
   4   5   0  375.16   21.40
   4   5   0  391.66   21.10
   4   5   0  398.56   21.50
  -4   5   0  469.25   21.80
   4   5   0  383.76   21.10
  -4   5   0  398.46   21.00
  -4   5   0  443.46   20.80
  -4   5   0  459.95   21.80
  -4   5   0  441.96   21.10
   5  -5   0  704.33   38.50
   5  -5   0  727.83   39.20
  -5  -5   0  805.32   39.10
  -5  -5   0  808.32   38.90
   5  -5   0  709.13   38.90
  -5  -5   0  820.12   39.00
  -5  -5   0  803.02   38.80
   5   5   0  728.33   38.50
  -5   5   0  829.82   38.20
   5   5   0  793.62   38.80
  -5   5   0  732.53   38.40
  -5   5   0  812.12   38.50
  -5   5   0  856.51   39.40
  -5   5   0  854.51   39.30
   5   5   0  733.83   38.90
   5   5   0  686.93   39.60
   5   5   0  759.02   39.00
   6  -5   0 1143.69   60.49
   6  -5   0 1097.09   59.59
  -6  -5   0 1282.57   59.49
   6  -5   0 1159.68   59.19
  -6  -5   0 1275.87   59.69
   6  -5   0 1149.48   59.79
  -6  -5   0 1284.37   59.79
  -6  -5   0 1271.67   59.49
   6   5   0 1147.59   58.99
   6   5   0 1149.08   59.49
   6   5   0 1177.68   59.49
  -6   5   0 1200.28   59.09
   6   5   0 1158.28   59.49
   6   5   0 1082.39   60.39
  -6   5   0 1160.98   58.89
  -6   5   0 1268.57   58.49
  -6   5   0 1296.97   59.89
  -6   5   0 1281.47   59.99
   7  -5   0  127.79    8.30
  -7  -5   0  141.69    8.80
   7  -5   0  133.89    9.90
   7  -5   0  128.99    8.90
  -7  -5   0  129.29    8.30
  -7  -5   0  134.29    8.40
   7  -5   0  123.79    9.00
  -7  -5   0  141.59    9.00
  -7   5   0  152.28    7.30
   7   5   0  122.19    8.70
   7   5   0  110.49    9.90
  -7   5   0  126.59    8.70
  -7   5   0  148.09    8.00
   7   5   0  126.09    7.90
   7   5   0  121.89    8.50
   7   5   0  123.99    8.70
   7   5   0  133.59    6.90
  -7   5   0  149.69    9.30
   8  -5   0  922.01   46.90
  -8  -5   0  942.31   46.80
   8  -5   0  919.11   47.30
  -8  -5   0  965.30   46.80
   8  -5   0  959.60   48.60
  -8  -5   0  994.80   47.20
   8  -5   0  863.11   47.40
  -8  -5   0  968.10   47.80
   8   5   0  921.21   46.20
   8   5   0  888.11   47.30
   8   5   0  827.02   48.40
   8   5   0  872.61   47.10
   8   5   0  970.90   45.40
  -8   5   0  961.20   46.20
  -8   5   0  968.90   45.50
  -8   5   0  944.61   47.30
   9  -5   0  233.08   15.80
   9  -5   0  261.07   14.20
   9  -5   0  209.58   14.50
  -9  -5   0  247.48   15.00
  -9  -5   0  251.47   14.20
  -9  -5   0  244.18   14.30
   9  -5   0  223.98   14.30
  -9   5   0  249.28   13.20
   9   5   0  215.28   15.90
   9   5   0  248.28   12.40
   9   5   0  232.78   13.10
  -9   5   0  251.67   14.40
   9   5   0  223.28   14.20
   9   5   0  237.68   14.60
  -9   5   0  266.17   14.90
  10  -5   0 1093.29   58.09
 -10  -5   0 1151.98   56.39
 -10  -5   0 1121.59   55.99
  10  -5   0 1071.99   56.49
 -10  -5   0 1162.78   57.59
  10  -5   0 1094.89   56.39
  10   5   0 1058.09   56.79
  10   5   0 1123.99   55.19
 -10   5   0 1168.28   55.29
  10   5   0 1138.89   54.69
  10   5   0 1086.39   58.59
 -10   5   0 1164.78   57.09
  10   5   0 1056.39   56.49
 -10   5   0 1142.69   56.59
  11  -5   0  637.14   34.00
  11  -5   0  616.64   33.70
 -11  -5   0  615.74   31.20
  11  -5   0  621.44   31.90
 -11  -5   0  592.14   31.50
 -11  -5   0  586.54   33.00
  11  -5   0  525.25   32.20
  11   5   0  572.74   32.30
 -11   5   0  610.24   30.40
  11   5   0  558.94   32.10
 -11   5   0  617.14   31.80
  11   5   0  615.64   29.90
  11   5   0  554.34   34.00
 -11   5   0  641.04   32.60
  11   5   0  598.54   30.30
 -12  -5   0  276.57   16.40
  12  -5   0  282.77   17.20
  12  -5   0  296.27   18.30
  12  -5   0  297.17   17.60
  12  -5   0  285.77   19.50
 -12  -5   0  282.07   16.40
 -12  -5   0  299.97   18.70
 -12  -5   0  274.87   16.80
  12   5   0  270.37   19.80
  12   5   0  286.97   15.40
 -12   5   0  292.77   15.50
 -12   5   0  318.07   18.10
  12   5   0  287.47   15.20
  12   5   0  255.67   17.80
  12   5   0  295.17   17.60
 -12   5   0  301.87   17.20
  13  -5   0   62.99    7.10
 -13  -5   0   57.49    5.50
  13  -5   0   49.90    8.40
  13  -5   0   41.00    6.80
 -13  -5   0   64.99    8.50
 -13  -5   0   50.49    5.60
  13  -5   0   52.49    6.50
 -13  -5   0   56.89    6.50
  13   5   0   55.09    4.40
 -13   5   0   57.39    6.20
  13   5   0   50.59    9.10
  13   5   0   67.19    7.30
  13   5   0   55.19    7.60
 -13   5   0   44.50    4.40
 -13   5   0   68.29    7.70
  13   5   0   57.69    4.60
 -14  -5   0  275.17   16.70
  14  -5   0  299.07   18.40
 -14  -5   0  308.27   17.70
  14  -5   0  323.87   21.10
  14  -5   0  315.47   19.60
  14  -5   0  319.67   18.70
 -14   5   0  273.87   17.60
 -14   5   0  298.97   15.70
  14   5   0  260.37   21.00
 -14   5   0  301.67   18.80
  14   5   0  324.07   18.80
 -14   5   0  284.07   15.70
  14   5   0  283.77   15.90
  14   5   0  317.17   19.70
  14   5   0  291.47   15.50
  15  -5   0   32.30    5.60
  15  -5   0   23.80    5.90
  15  -5   0   36.50    6.10
 -15  -5   0   26.30    4.80
 -15  -5   0   30.70    4.30
  15  -5   0   18.40    6.90
 -15   5   0   24.50    5.60
 -15   5   0   28.90    3.20
  15   5   0   27.30    6.70
  15   5   0   29.40    3.60
  15   5   0   24.60    2.30
  15   5   0   26.60    8.00
 -15   5   0   23.80    4.70
  15   5   0   24.10    2.40
  15   5   0   15.10    5.30
 -15   5   0   30.10    3.10
  15   5   0   31.50    5.60
  16  -5   0   -0.40    5.50
  16  -5   0    6.40    4.30
  16  -5   0   10.80    4.30
 -16  -5   0    1.50    3.40
 -16  -5   0    6.60    2.40
 -16  -5   0    7.70    3.00
  16  -5   0    1.50    4.50
 -16   5   0    2.90    1.40
  16   5   0    5.40    2.40
  16   5   0    1.50    5.00
  16   5   0   -1.70    6.90
 -16   5   0    6.30    2.70
 -16   5   0    4.20    3.90
 -16   5   0    3.50    1.50
  16   5   0    7.60    4.40
  17  -5   0  179.88   13.20
 -17  -5   0  151.28   11.20
  17  -5   0  176.18   12.80
 -17  -5   0  134.69   11.00
  17  -5   0  160.38   15.20
 -17  -5   0  155.18   10.30
  17  -5   0  156.58   13.50
 -17   5   0  113.79   11.90
  17   5   0  175.98    9.90
  17   5   0  173.98   13.30
  17   5   0  139.39   16.90
  17   5   0  159.78   14.20
  18  -5   0   25.50    6.30
  18  -5   0   43.80    9.40
 -18  -5   0   32.30    5.10
  18  -5   0   26.10    6.70
 -18  -5   0   37.30    4.60
  18  -5   0   30.90    6.30
 -18  -5   0   38.10    4.40
  18   5   0   49.40    7.70
  18   5   0   24.70    9.70
  18   5   0   30.00    8.10
  19  -5   0  471.15   30.50
  19  -5   0  418.66   26.90
  19  -5   0  435.06   26.60
 -19  -5   0  420.96   23.30
 -19  -5   0  429.46   23.30
 -19  -5   0  439.06   24.60
  19  -5   0  513.25   28.60
  19   5   0  474.15   32.40
  19   5   0  450.35   28.90
  19   5   0  457.65   27.10
  20  -5   0   32.90    9.80
  20  -5   0   40.60    8.10
  20  -5   0   30.70    6.80
  20   5   0   49.60   11.60
  20   5   0   38.60    7.00
  20   5   0   38.10    8.90
  21  -5   0   -1.80    5.00
  21  -5   0    1.60    7.00
  21  -5   0    1.00    5.50
 -21  -5   0   -0.80    1.50
  21   5   0    6.20    7.00
  21   5   0   14.10    8.90
  21   5   0   13.40    4.90
  22  -5   0   57.49    8.80
  22  -5   0   44.50    8.40
  22  -5   0   55.09   11.20
  22   5   0   40.50   10.10
  22   5   0   48.70    8.10
  22   5   0   63.39   12.80
  23  -5   0   20.10    8.50
  23  -5   0   21.20    6.70
  23  -5   0   21.50    6.40
  23   5   0   19.10   10.00
  23   5   0   16.60    5.70
  23   5   0   28.30   11.10
   1  -6   0 2923.11  139.59
   1  -6   0 2886.81  139.79
   1  -6   0 2811.02  139.49
  -1  -6   0 2968.60  139.59
  -1  -6   0 3043.20  139.79
   1  -6   0 3035.50  139.69
  -1  -6   0 2756.12  138.69
  -1  -6   0 2785.42  139.59
  -1   6   0 2564.44  139.49
   1   6   0 2856.41  138.79
  -1   6   0 2685.23  139.19
  -1   6   0 3030.90  139.69
   1   6   0 2828.12  139.49
   1   6   0 2805.42  139.69
   1   6   0 3210.18  139.79
   1   6   0 2761.62  139.59
  -1   6   0 2828.02  139.79
  -1   6   0 2901.71  139.19
   2  -6   0 3540.95  176.78
  -2  -6   0 3615.84  176.78
   2  -6   0 3770.22  176.58
   2  -6   0 3946.31  177.08
   2  -6   0 3602.44  176.28
  -2  -6   0 3650.83  176.58
   2  -6   0 3849.42  177.08
   2  -6   0 3454.85  176.38
   2   6   0 3706.03  176.88
   2   6   0 3606.14  175.68
   2   6   0 3395.06  176.88
   2   6   0 3696.73  176.68
  -2   6   0 3396.66  176.88
  -2   6   0 3826.72  177.18
  -2   6   0 3595.14  176.28
  -3  -6   0  873.81   42.20
  -3  -6   0  844.32   40.90
  -3  -6   0  849.81   42.40
  -3  -6   0  899.91   42.90
  -3  -6   0  941.51   42.40
   3  -6   0  798.22   41.80
   3  -6   0  808.22   42.10
   3  -6   0  772.52   42.30
   3  -6   0  816.12   42.60
   3  -6   0  860.11   42.70
  -3  -6   0  899.81   41.70
   3  -6   0  816.92   42.00
   3   6   0  839.22   41.70
  -3   6   0  866.51   42.30
  -3   6   0  871.51   42.50
  -3   6   0  782.42   41.70
   3   6   0  777.22   42.60
   3   6   0  809.62   42.30
  -3   6   0  911.51   41.80
   3   6   0  847.72   42.30
   3   6   0  835.12   40.90
  -3   6   0  875.31   42.00
   3   6   0  795.92   42.20
   3   6   0  863.61   42.00
   4  -6   0 2179.38  106.39
  -4  -6   0 2415.36  107.49
  -4  -6   0 2259.77  106.59
   4  -6   0 2028.70  106.99
   4  -6   0 2112.49  106.09
   4  -6   0 1958.20  106.49
   4  -6   0 2292.17  107.39
  -4  -6   0 2185.78  106.79
   4  -6   0 2029.70  106.79
  -4  -6   0 2301.17  106.19
  -4  -6   0 2325.07  106.69
  -4   6   0 2311.07  105.99
  -4   6   0 2267.47  106.89
  -4   6   0 2350.16  106.89
   4   6   0 2084.39  106.19
   4   6   0 2067.09  107.19
  -4   6   0 2061.59  105.99
   4   6   0 2228.78  106.19
   4   6   0 2144.69  106.69
   4   6   0 1987.20  106.59
  -4   6   0 2234.38  106.29
   5  -6   0   17.50    3.20
  -5  -6   0   22.60    3.10
   5  -6   0   14.80    2.50
   5  -6   0   17.30    3.60
  -5  -6   0   24.40    3.00
   5  -6   0   12.10    2.80
  -5  -6   0   17.50    2.80
  -5  -6   0   23.50    3.70
  -5   6   0   21.00    2.70
   5   6   0   23.80    2.90
   5   6   0   18.60    3.00
   5   6   0   21.90    3.20
  -5   6   0   17.60    3.10
  -5   6   0   26.10    2.50
   5   6   0   18.10    2.60
  -5   6   0   17.80    2.50
  -5   6   0   21.10    3.40
   5   6   0   15.00    3.40
   6  -6   0 1744.83   90.99
  -6  -6   0 1927.21   91.59
   6  -6   0 1677.33   91.49
  -6  -6   0 1981.90   91.89
   6  -6   0 1699.13   91.79
  -6  -6   0 1948.51   91.49
  -6  -6   0 1931.21   91.49
   6   6   0 1690.73   92.39
  -6   6   0 1910.51   91.09
  -6   6   0 1949.51   91.99
  -6   6   0 1955.40   90.99
   6   6   0 1917.51   91.49
   6   6   0 1790.62   90.99
  -6   6   0 1895.51   90.59
   6   6   0 1808.72   91.59
  -6   6   0 2020.30   91.99
   6   6   0 1816.52   91.59
  -7  -6   0 2178.98  103.99
   7  -6   0 2211.38  105.59
   7  -6   0 1899.21  104.39
   7  -6   0 1958.30  104.19
  -7  -6   0 2328.27  104.49
  -7  -6   0 2187.18  103.99
   7  -6   0 2025.70  103.69
  -7  -6   0 2213.58  104.39
   7   6   0 1979.40  105.29
  -7   6   0 2194.38  103.49
  -7   6   0 2129.69  103.59
   7   6   0 2101.39  103.49
   7   6   0 2095.09  104.19
   7   6   0 1985.40  104.09
   7   6   0 2048.90  104.09
  -7   6   0 2207.68  104.79
  -7   6   0 2311.27  102.99
   8  -6   0    0.70    1.80
  -8  -6   0    0.70    2.00
   8  -6   0   -1.40    3.00
  -8  -6   0    1.50    2.40
  -8  -6   0    0.20    2.40
   8  -6   0    2.00    2.70
  -8  -6   0    2.00    2.00
   8  -6   0   -0.80    2.30
   8   6   0   -5.20    2.90
  -8   6   0    2.10    2.30
  -8   6   0    1.50    1.10
   8   6   0   -2.30    2.10
   8   6   0   -1.50    1.40
  -8   6   0    0.20    2.40
   8   6   0    1.40    2.30
  -8   6   0   -1.40    1.50
  -9  -6   0  305.17   16.60
  -9  -6   0  302.97   16.60
   9  -6   0  267.67   17.10
  -9  -6   0  303.87   17.10
   9  -6   0  327.37   16.90
   9  -6   0  309.17   20.40
   9  -6   0  256.77   17.30
  -9  -6   0  329.77   17.80
   9   6   0  296.57   17.20
  -9   6   0  288.97   15.10
   9   6   0  273.17   18.80
  -9   6   0  290.27   17.10
  -9   6   0  291.17   15.90
  -9   6   0  291.87   17.40
   9   6   0  300.87   16.10
   9   6   0  316.57   17.40
  10  -6   0   28.20    4.40
 -10  -6   0   30.70    4.60
  10  -6   0   29.60    4.80
 -10  -6   0   36.00    4.40
 -10  -6   0   37.70    4.40
  10  -6   0   20.40    5.70
 -10  -6   0   40.10    5.70
  10  -6   0   28.20    5.30
  10   6   0   28.40    2.40
  10   6   0   27.60    3.50
  10   6   0   19.50    6.00
  10   6   0   24.30    4.70
 -10   6   0   34.80    3.70
 -10   6   0   36.30    5.00
 -10   6   0   33.80    5.30
  10   6   0   26.70    4.50
  11  -6   0 1044.80   53.49
  11  -6   0 1032.00   51.79
  11  -6   0  978.90   51.29
 -11  -6   0 1020.60   52.59
 -11  -6   0 1040.90   51.39
 -11  -6   0  996.80   50.79
  11  -6   0  893.71   51.89
 -11  -6   0  979.20   50.79
  11   6   0 1015.20   49.20
  11   6   0 1014.30   50.09
  11   6   0 1025.20   52.09
 -11   6   0 1029.30   49.99
  11   6   0 1041.70   51.79
  11   6   0  929.21   53.59
 -11   6   0 1016.20   51.59
 -11   6   0 1033.20   52.19
 -12  -6   0  505.45   29.00
  12  -6   0  562.84   30.40
  12  -6   0  595.64   30.30
  12  -6   0  585.64   32.40
 -12  -6   0  553.14   29.10
 -12  -6   0  565.14   29.80
  12  -6   0  504.35   30.60
 -12  -6   0  545.85   31.30
  12   6   0  551.74   28.30
  12   6   0  526.85   32.50
  12   6   0  573.54   27.60
 -12   6   0  566.24   30.70
 -12   6   0  564.54   30.00
  12   6   0  556.04   30.70
 -12   6   0  532.25   28.10
  12   6   0  551.64   30.20
 -13  -6   0  254.97   15.60
  13  -6   0  238.88   16.90
 -13  -6   0  239.18   14.80
  13  -6   0  262.07   15.90
  13  -6   0  293.67   19.00
 -13  -6   0  264.97   14.90
 -13  -6   0  261.17   17.20
  13  -6   0  264.17   16.40
  13   6   0  252.57   16.20
 -13   6   0  228.58   13.60
  13   6   0  247.38   16.60
  13   6   0  245.68   13.90
  13   6   0  262.17   13.40
 -13   6   0  257.77   16.70
  13   6   0  228.28   18.50
 -13   6   0  238.98   15.60
  14  -6   0  153.88   12.90
 -14  -6   0  139.69    9.80
  14  -6   0  163.08   11.60
 -14  -6   0  148.89   11.00
 -14  -6   0  147.49   12.70
  14  -6   0  172.18   14.70
  14  -6   0  163.38   12.10
  14   6   0  147.59   14.70
  14   6   0  144.89   12.60
  14   6   0  147.19    9.00
 -14   6   0  152.58    8.90
 -14   6   0  144.39   11.90
  14   6   0  150.38    8.80
  14   6   0  159.28   11.90
  15  -6   0   67.39    8.10
  15  -6   0   65.79    7.90
  15  -6   0   48.90    9.60
 -15  -6   0   53.69    5.40
  15  -6   0   65.49    9.00
 -15  -6   0   54.89    6.90
 -15   6   0   60.49    8.10
 -15   6   0   57.49    4.30
  15   6   0   53.29   10.50
 -15   6   0   59.29    6.60
  15   6   0   74.89    8.10
  15   6   0   62.99    9.00
  15   6   0   59.39    4.60
 -15   6   0   54.59    4.40
  16  -6   0  137.29   14.90
  16  -6   0  164.78   12.60
 -16  -6   0  157.38   11.30
 -16  -6   0  136.89    9.80
  16  -6   0  146.69   13.40
  16  -6   0  140.49   11.70
 -16  -6   0  154.38   10.20
 -16   6   0  130.39   12.00
  16   6   0  165.58    8.20
  16   6   0  154.38    8.00
  16   6   0  158.78   12.60
  16   6   0  137.39   15.80
  16   6   0  152.28   13.60
 -16   6   0  155.38    8.10
 -16   6   0  145.89    8.10
  17  -6   0  242.08   16.50
  17  -6   0  212.18   15.70
 -17  -6   0  227.58   14.00
  17  -6   0  225.38   17.50
 -17  -6   0  217.88   13.60
  17  -6   0  242.68   19.20
 -17  -6   0  223.28   15.00
  17   6   0  256.47   18.00
  17   6   0  250.27   16.70
  17   6   0  240.08   20.60
 -18  -6   0    5.70    2.80
  18  -6   0    2.10    4.70
 -18  -6   0    5.30    2.70
 -18  -6   0    6.90    3.60
  18  -6   0    2.10    6.50
  18  -6   0    6.30    5.30
  18   6   0   11.10    6.00
  18   6   0    6.00    4.50
  18   6   0    5.80    7.90
  19  -6   0    9.10    5.30
 -19  -6   0   14.90    4.10
  19  -6   0   16.00    5.10
  19  -6   0   11.70    5.70
 -19  -6   0   10.90    2.90
  19  -6   0   12.50    7.90
 -19  -6   0    8.80    2.50
  19   6   0    4.80    5.10
  19   6   0   16.10    9.00
  19   6   0   33.20    8.30
  20  -6   0  122.79   15.30
  20  -6   0   90.79   11.60
  20  -6   0   79.79   10.20
  20   6   0   67.69   11.60
  20   6   0   84.79   15.10
  20   6   0   85.59    9.90
  21  -6   0   17.10    5.70
  21  -6   0   15.00    8.70
  21  -6   0   17.00    6.80
  21   6   0   21.40    5.90
  21   6   0   13.30    8.30
  21   6   0   12.80    8.10
  22  -6   0   -2.90    4.40
  22  -6   0    4.20    8.00
  22  -6   0    5.00    5.00
  22   6   0    6.10    7.20
  22   6   0    8.10    4.80
  22   6   0   11.40    9.10
  23  -6   0   -0.80    4.70
  23  -6   0    8.10    5.70
  23  -6   0   23.10    9.00
  23   6   0    8.50    8.90
  23   6   0   -1.00    7.70
  23   6   0    4.60    4.70
   0  -7   0   47.30    4.50
   0   7   0   32.40    4.00
   1  -7   0 4689.53  214.88
   1  -7   0 4548.65  214.58
  -1  -7   0 4296.07  214.58
  -1  -7   0 4656.93  214.58
   1  -7   0 4411.26  214.48
   1   7   0 4255.37  214.58
  -1   7   0 4340.47  214.18
  -1   7   0 4518.55  214.88
   1   7   0 4538.75  214.48
   1   7   0 4202.88  214.58
  -1   7   0 4218.88  214.58
  -2  -7   0 1135.59   57.49
  -2  -7   0 1260.67   57.89
   2  -7   0 1135.99   57.79
  -2  -7   0 1247.28   56.89
  -2  -7   0 1161.08   56.39
  -2  -7   0 1166.48   57.89
   2  -7   0 1158.68   57.29
   2  -7   0 1123.89   57.89
   2  -7   0 1105.79   57.39
   2  -7   0 1214.38   57.99
   2  -7   0 1091.49   57.09
  -2  -7   0 1111.09   57.69
   2   7   0 1180.48   57.69
  -2   7   0 1111.39   57.89
   2   7   0 1223.28   57.09
   2   7   0 1049.99   57.79
  -2   7   0 1157.68   58.09
  -2   7   0 1248.08   57.29
  -2   7   0 1213.08   57.39
  -2   7   0 1215.38   57.79
  -2   7   0 1096.89   57.19
   2   7   0 1047.00   57.69
   2   7   0 1142.09   56.49
   2   7   0 1204.38   57.39
  -2   7   0 1243.18   57.59
   2   7   0 1099.49   57.49
  -3  -7   0    9.90    2.30
   3  -7   0   11.20    2.90
   3  -7   0   10.00    2.10
  -3  -7   0   11.60    2.80
  -3  -7   0    9.30    1.80
   3  -7   0    8.60    2.60
   3  -7   0    8.50    2.40
  -3  -7   0   14.50    1.40
  -3  -7   0    8.50    2.30
   3  -7   0   13.30    2.60
   3  -7   0   11.40    2.60
  -3  -7   0    6.60    2.40
   3   7   0   13.00    1.40
  -3   7   0    9.40    2.20
   3   7   0   13.40    2.30
  -3   7   0   15.00    2.30
   3   7   0    8.20    2.50
  -3   7   0    7.90    2.20
  -3   7   0    9.70    2.10
  -3   7   0    5.50    2.70
   3   7   0   18.00    2.60
   3   7   0    7.90    2.40
   3   7   0   12.40    2.60
   3   7   0   10.90    2.80
  -3   7   0    7.10    2.20
   4  -7   0 1044.30   50.49
   4  -7   0  980.50   50.89
  -4  -7   0 1058.79   50.99
  -4  -7   0 1015.20   49.99
  -4  -7   0  992.40   50.49
   4  -7   0 1035.20   51.29
   4  -7   0  956.70   51.09
  -4  -7   0 1110.59   51.59
   4  -7   0  990.20   50.09
   4  -7   0  911.91   50.39
  -4  -7   0 1107.49   50.79
   4   7   0  903.71   50.59
  -4   7   0 1084.69   50.99
  -4   7   0 1066.69   50.39
   4   7   0  983.10   50.59
   4   7   0  936.81   51.09
   4   7   0 1050.19   50.79
  -4   7   0 1062.19   49.99
   4   7   0  948.51   50.19
   4   7   0 1003.00   50.09
  -4   7   0 1065.49   50.79
  -4   7   0  963.50   49.99
   5  -7   0 1045.30   56.29
   5  -7   0 1074.99   56.09
  -5  -7   0 1180.18   57.09
  -5  -7   0 1132.59   55.69
  -5  -7   0 1172.48   56.09
   5  -7   0 1108.69   55.59
   5  -7   0 1161.88   57.09
  -5  -7   0 1145.49   55.99
  -5  -7   0 1173.68   56.39
   5  -7   0 1070.39   56.59
   5   7   0 1078.29   55.59
  -5   7   0 1136.29   55.49
   5   7   0 1013.70   56.09
   5   7   0 1094.19   56.19
   5   7   0 1059.99   55.59
  -5   7   0 1219.08   56.49
   5   7   0  942.61   56.49
  -5   7   0 1209.08   55.39
  -5   7   0 1193.58   55.69
  -5   7   0 1246.68   56.49
  -6  -7   0 1063.69   49.90
   6  -7   0  998.30   51.09
  -6  -7   0 1044.20   49.80
  -6  -7   0 1056.69   50.29
   6  -7   0  964.90   49.40
   6  -7   0  882.71   49.80
   6  -7   0  902.71   50.19
  -6  -7   0 1033.60   49.70
   6   7   0  935.61   49.90
  -6   7   0 1084.09   49.00
  -6   7   0 1018.10   49.40
  -6   7   0 1008.60   49.30
   6   7   0  897.01   49.80
  -6   7   0 1043.80   50.29
   6   7   0  957.10   49.50
  -6   7   0 1019.50   50.19
   6   7   0  937.91   49.40
  -7  -7   0 1352.86   63.59
   7  -7   0 1245.48   62.69
   7  -7   0 1156.58   63.59
  -7  -7   0 1335.07   63.29
   7  -7   0 1140.49   63.19
  -7  -7   0 1317.67   63.09
  -7  -7   0 1277.77   62.99
  -7   7   0 1252.07   62.59
   7   7   0 1257.87   62.99
   7   7   0 1180.28   64.39
  -7   7   0 1355.46   63.69
  -7   7   0 1347.87   62.09
  -7   7   0 1308.97   63.69
  -7   7   0 1334.67   62.59
   7   7   0 1211.68   62.59
   7   7   0 1164.48   63.19
   7   7   0 1268.77   63.29
  -8  -7   0  128.09    9.70
  -8  -7   0  155.38    9.60
  -8  -7   0  136.69   10.00
   8  -7   0  135.19   10.40
   8  -7   0  139.59   10.20
   8  -7   0  150.48    9.30
   8  -7   0  166.98   11.80
  -8  -7   0  144.29    9.50
  -8   7   0  152.98    8.40
   8   7   0  151.48    9.20
  -8   7   0  157.68    9.00
   8   7   0  136.19    9.70
   8   7   0  124.39   11.20
  -8   7   0  160.38   10.50
  -8   7   0  156.98   10.20
   8   7   0  135.79    9.90
   8   7   0  140.79    9.90
  -8   7   0  169.08    9.40
  -9  -7   0  121.29    8.00
   9  -7   0  124.39   10.30
  -9  -7   0  112.29    7.90
   9  -7   0  101.99    7.70
   9  -7   0  107.49   11.10
  -9  -7   0  110.59    8.50
   9  -7   0  102.39    8.50
  -9  -7   0  108.99    8.70
   9   7   0  112.09    8.60
   9   7   0  111.89    7.40
  -9   7   0  112.89    8.50
  -9   7   0  110.29    7.20
   9   7   0  110.19    8.50
   9   7   0   82.29   11.30
  -9   7   0  117.69    8.90
  -9   7   0  104.59    6.40
 -10  -7   0  890.31   44.80
  10  -7   0  923.01   46.80
  10  -7   0  889.51   44.40
  10  -7   0  773.42   45.20
  10  -7   0  864.91   45.10
 -10  -7   0  897.11   45.50
 -10  -7   0  847.72   44.10
 -10  -7   0  880.41   44.30
 -10   7   0  881.91   43.50
  10   7   0  882.01   45.00
 -10   7   0  863.31   45.40
  10   7   0  858.41   43.70
  10   7   0  833.22   46.80
 -10   7   0  847.92   42.60
 -10   7   0  891.11   45.00
 -11  -7   0   10.80    3.00
  11  -7   0   10.80    5.40
 -11  -7   0    9.00    2.80
 -11  -7   0    4.20    3.30
 -11  -7   0    9.60    3.80
  11  -7   0    5.20    3.00
  11  -7   0    6.10    3.80
  11  -7   0    0.10    3.30
 -11   7   0   10.30    3.80
  11   7   0    4.10    2.20
 -11   7   0   11.20    3.60
  11   7   0    3.90    3.30
  11   7   0    3.10    4.90
  11   7   0    4.90    3.60
 -11   7   0    6.80    2.30
 -12  -7   0  104.59    9.70
 -12  -7   0   94.69    8.00
  12  -7   0  127.19   11.60
  12  -7   0  109.49    9.70
  12  -7   0  106.69   10.10
 -12  -7   0  100.29    7.80
 -12  -7   0  106.09    9.10
  12   7   0  118.49   12.50
  12   7   0  110.79    9.90
 -12   7   0  112.19    7.20
 -12   7   0  113.79    8.90
  12   7   0  103.59    9.30
 -12   7   0  105.59    9.60
  12   7   0   97.29    7.30
  13  -7   0  380.06   22.90
 -13  -7   0  322.37   18.60
 -13  -7   0  305.07   19.50
 -13  -7   0  313.97   18.60
  13  -7   0  348.27   20.40
  13  -7   0  304.97   20.70
  13  -7   0  358.56   19.80
 -13  -7   0  298.17   20.60
  13   7   0  339.67   18.00
 -13   7   0  313.77   17.60
  13   7   0  378.36   20.50
  13   7   0  306.67   22.70
 -13   7   0  309.37   20.30
  13   7   0  367.06   20.90
 -13   7   0  332.37   19.70
  14  -7   0  256.27   18.20
  14  -7   0  230.38   15.60
 -14  -7   0  209.18   13.40
 -14  -7   0  212.38   16.20
 -14  -7   0  194.48   14.50
  14  -7   0  240.88   15.00
  14  -7   0  231.88   16.40
 -14   7   0  227.48   14.70
  14   7   0  229.08   16.00
 -14   7   0  219.88   12.40
  14   7   0  229.38   15.30
  14   7   0  237.18   13.00
  14   7   0  220.48   18.60
  15  -7   0  345.57   20.40
 -15  -7   0  313.77   19.20
  15  -7   0  309.27   19.30
 -15  -7   0  300.37   17.80
  15  -7   0  347.57   23.00
  15  -7   0  320.07   21.00
 -15   7   0  283.27   18.80
  15   7   0  325.77   17.20
 -15   7   0  318.17   20.40
  15   7   0  324.57   20.00
  15   7   0  329.07   20.80
 -15   7   0  308.17   16.50
  15   7   0  309.57   23.50
 -15   7   0  317.67   16.50
 -16  -7   0   32.00    6.60
  16  -7   0   21.50    5.90
  16  -7   0   19.30    6.10
  16  -7   0   28.70    5.30
 -16  -7   0   28.30    4.10
  16  -7   0   27.60    8.40
  16   7   0   23.60    5.90
  16   7   0   22.60    8.00
 -16   7   0   21.60    2.30
 -16   7   0   23.30    2.30
  16   7   0   32.20    6.80
  16   7   0   28.80    3.30
  17  -7   0  812.92   46.60
 -17  -7   0  762.42   40.20
  17  -7   0  827.52   44.40
 -17  -7   0  770.92   42.20
  17  -7   0  765.72   42.40
  17  -7   0  798.72   43.00
 -17  -7   0  751.62   40.10
  17   7   0  762.82   46.90
  17   7   0  806.32   43.00
  17   7   0  810.72   44.00
  18  -7   0  138.19   15.60
  18  -7   0  122.59   13.20
  18  -7   0  101.99   10.40
 -18  -7   0  117.09    8.10
  18  -7   0  121.79   12.00
 -18  -7   0  120.69   10.00
 -18  -7   0  113.09    8.00
  18   7   0   99.59   15.10
  18   7   0  137.39   11.90
  18   7   0  137.99   13.20
  19  -7   0  225.18   17.50
 -19  -7   0  262.67   14.40
  19  -7   0  258.87   18.60
  19  -7   0  296.37   22.30
 -19  -7   0  255.37   14.40
 -19  -7   0  275.57   16.80
  19  -7   0  253.67   19.60
  19   7   0  263.47   20.20
  19   7   0  296.97   24.10
  19   7   0  261.37   20.20
  20  -7   0    0.30    5.80
  20  -7   0   13.30    6.30
  20  -7   0   13.20    5.40
  20  -7   0    5.70    7.50
  20   7   0   24.80    8.30
  20   7   0   16.60    5.70
  20   7   0   23.60   10.40
  21  -7   0   62.69    9.90
  21  -7   0   82.39   13.30
  21  -7   0   53.09    8.80
  21   7   0   55.19   12.50
  21   7   0   53.09   10.70
  21   7   0   61.99    8.80
  22  -7   0   10.40    6.20
  22  -7   0   12.80    5.90
  22  -7   0   12.20    8.80
  22   7   0   14.20    9.50
  22   7   0   21.10    8.10
  22   7   0   12.00    5.00
  23  -7   0   13.60    5.80
  23  -7   0   17.70    6.80
  23  -7   0    6.40    8.00
  23   7   0   18.20    5.60
  23   7   0   28.80   11.60
  23   7   0   10.20   12.10
   0  -8   0  766.62   38.40
   0  -8   0  717.13   37.30
   0  -8   0  784.82   38.40
   0  -8   0  785.82   38.60
   0   8   0  668.23   38.10
   0   8   0  821.52   38.40
   0   8   0  734.93   38.50
   0   8   0  724.23   38.20
   0   8   0  688.63   37.40
   0   8   0  825.82   38.00
  -1  -8   0 1160.68   55.69
  -1  -8   0 1130.09   56.39
   1  -8   0 1073.69   56.59
  -1  -8   0  987.30   56.19
   1  -8   0 1256.77   56.69
  -1  -8   0 1213.08   56.69
   1  -8   0 1077.99   56.39
   1  -8   0 1020.00   56.19
   1  -8   0 1152.68   55.79
  -1  -8   0 1125.09   55.29
  -1  -8   0 1184.28   56.59
   1   8   0 1063.69   56.29
   1   8   0 1111.09   55.39
  -1   8   0 1159.78   56.89
   1   8   0 1191.28   56.09
  -1   8   0 1154.98   56.19
  -1   8   0 1092.29   55.79
   1   8   0 1037.50   56.49
  -1   8   0 1202.98   56.09
  -1   8   0 1199.98   56.39
  -1   8   0 1019.20   56.39
   1   8   0 1210.18   56.49
  -1   8   0 1150.78   56.49
   2  -8   0  545.55   28.00
  -2  -8   0  492.55   27.80
   2  -8   0  515.95   27.70
  -2  -8   0  540.55   27.80
  -2  -8   0  583.54   28.10
   2  -8   0  527.95   28.00
  -2  -8   0  540.95   26.90
  -2  -8   0  535.05   28.10
   2  -8   0  506.95   27.30
   2  -8   0  527.65   28.20
  -2  -8   0  540.45   26.50
   2   8   0  505.55   26.50
   2   8   0  496.85   28.00
  -2   8   0  564.24   27.40
   2   8   0  569.74   28.00
   2   8   0  518.95   27.80
  -2   8   0  555.44   28.00
  -2   8   0  532.15   27.40
   2   8   0  496.65   27.90
  -2   8   0  540.75   28.30
  -2   8   0  526.85   27.40
  -2   8   0  541.65   27.60
   2   8   0  545.35   27.50
   3  -8   0   30.80    4.30
   3  -8   0   28.60    3.90
   3  -8   0   34.80    4.10
  -3  -8   0   35.70    2.50
  -3  -8   0   39.00    4.40
   3  -8   0   37.10    4.90
   3  -8   0   35.10    4.40
   3  -8   0   33.60    3.80
  -3  -8   0   31.30    4.00
  -3  -8   0   31.50    4.40
  -3  -8   0   43.30    5.10
  -3  -8   0   34.60    3.20
  -3   8   0   35.00    3.80
  -3   8   0   32.30    3.90
  -3   8   0   37.40    4.10
  -3   8   0   35.00    5.00
   3   8   0   39.80    3.90
   3   8   0   40.90    4.50
   3   8   0   24.60    3.80
   3   8   0   34.00    4.70
   3   8   0   35.50    2.70
  -3   8   0   45.70    4.90
  -3   8   0   36.70    3.70
   3   8   0   35.30    3.50
   3   8   0   35.10    4.30
   4  -8   0    0.20    1.70
  -4  -8   0    0.70    2.30
  -4  -8   0    1.60    1.50
   4  -8   0    0.90    2.30
   4  -8   0   -0.70    1.90
  -4  -8   0    1.80    0.70
   4  -8   0    2.30    2.50
   4  -8   0    1.70    2.70
  -4  -8   0    2.20    2.00
  -4  -8   0   -1.90    2.30
   4  -8   0   -0.80    2.10
  -4  -8   0    0.40    1.90
   4   8   0    2.10    1.70
  -4   8   0    0.70    2.10
   4   8   0    2.70    1.90
  -4   8   0    1.30    1.70
  -4   8   0    1.40    1.60
   4   8   0   -1.50    2.10
   4   8   0    1.90    2.70
  -4   8   0    3.70    2.50
   4   8   0    2.90    2.20
  -4   8   0   -2.40    1.80
   4   8   0    1.10    2.20
   5  -8   0 4600.64  243.38
   5  -8   0 5255.27  244.48
  -5  -8   0 5354.46  243.58
  -5  -8   0 5136.19  243.48
   5  -8   0 4624.54  243.78
  -5  -8   0 5348.76  244.58
  -5  -8   0 5300.77  242.98
   5  -8   0 4944.01  242.98
   5  -8   0 4810.02  244.08
  -5  -8   0 5416.06  243.98
  -5   8   0 5040.00  242.88
   5   8   0 5105.09  242.98
   5   8   0 4741.73  244.28
   5   8   0 4674.23  243.58
  -5   8   0 5282.87  243.98
   5   8   0 4832.22  243.08
   5   8   0 4886.51  243.68
  -6  -8   0  195.28   11.30
  -6  -8   0  205.68   11.40
   6  -8   0  180.48   12.60
   6  -8   0  166.28   11.70
   6  -8   0  174.68   12.00
   6  -8   0  177.08   10.70
  -6  -8   0  188.38   10.90
  -6  -8   0  200.38   11.90
   6  -8   0  164.48   11.40
  -6   8   0  180.98   10.80
  -6   8   0  189.78   11.70
   6   8   0  172.08   11.50
  -6   8   0  184.98   10.40
   6   8   0  157.78   12.20
  -6   8   0  173.68   10.50
   6   8   0  183.38   10.90
   6   8   0  191.78   11.60
  -6   8   0  209.98   11.90
   6   8   0  166.98   10.80
   7  -8   0 1113.49   54.59
   7  -8   0 1001.90   55.19
  -7  -8   0 1254.07   56.39
  -7  -8   0 1097.89   54.79
   7  -8   0 1072.99   55.89
   7  -8   0  961.50   55.39
  -7  -8   0 1112.09   54.89
   7  -8   0 1149.69   56.69
  -7  -8   0 1107.09   55.39
  -7   8   0 1085.39   54.29
   7   8   0 1098.89   54.59
   7   8   0 1074.09   54.79
   7   8   0 1017.00   56.19
   7   8   0 1093.19   55.19
  -7   8   0 1126.39   54.39
   7   8   0 1014.10   55.09
  -7   8   0 1116.29   55.59
  -7   8   0 1162.78   54.09
  -7   8   0 1099.99   55.39
   8  -8   0  305.47   18.20
   8  -8   0  279.17   15.80
   8  -8   0  297.27   18.10
   8  -8   0  256.17   16.60
  -8  -8   0  293.47   16.20
   8  -8   0  259.07   17.00
  -8  -8   0  273.87   16.60
  -8  -8   0  270.87   17.20
  -8  -8   0  295.07   16.20
  -8   8   0  287.77   17.00
  -8   8   0  282.97   15.70
   8   8   0  293.67   15.90
   8   8   0  266.77   16.60
   8   8   0  245.58   17.60
   8   8   0  269.97   16.20
  -8   8   0  299.07   15.70
   8   8   0  296.07   16.80
  -8   8   0  305.17   15.20
  -8   8   0  286.97   16.80
  -9  -8   0 1323.57   66.59
   9  -8   0 1513.25   68.69
   9  -8   0 1131.79   66.69
  -9  -8   0 1315.07   65.99
   9  -8   0 1287.97   70.49
  -9  -8   0 1366.76   65.99
   9  -8   0 1289.67   65.79
  -9  -8   0 1360.66   66.79
   9   8   0 1337.47   66.59
  -9   8   0 1344.67   66.79
   9   8   0 1223.98   66.39
  -9   8   0 1343.07   65.39
   9   8   0 1243.88   68.09
  -9   8   0 1332.97   64.79
   9   8   0 1329.97   66.39
  -9   8   0 1372.86   67.09
   9   8   0 1341.07   65.69
 -10  -8   0  846.62   44.60
  10  -8   0  944.01   46.50
  10  -8   0  764.92   44.20
 -10  -8   0  826.02   43.50
  10  -8   0  857.21   43.60
  10  -8   0  772.32   44.70
 -10  -8   0  846.92   44.30
 -10  -8   0  836.42   43.60
 -10   8   0  876.11   44.90
 -10   8   0  918.31   43.00
  10   8   0  867.11   44.30
 -10   8   0  869.51   44.50
 -10   8   0  856.21   42.20
  10   8   0  823.82   46.20
  10   8   0  862.41   43.20
  10   8   0  861.61   44.40
  11  -8   0   46.40    7.90
 -11  -8   0   56.09    6.80
 -11  -8   0   49.10    5.40
  11  -8   0   29.70    5.70
  11  -8   0   49.40    5.80
 -11  -8   0   43.50    5.40
  11  -8   0   29.70    5.70
 -11  -8   0   63.59    7.50
 -11   8   0   47.80    6.40
 -11   8   0   42.20    4.50
 -11   8   0   46.40    3.40
  11   8   0   31.00    7.20
  11   8   0   38.80    5.70
  11   8   0   54.59    5.20
 -11   8   0   52.69    6.90
  11   8   0   48.50    6.30
 -12  -8   0  548.35   28.80
  12  -8   0  548.25   30.80
 -12  -8   0  531.35   29.70
  12  -8   0  520.15   29.90
 -12  -8   0  510.65   28.60
  12  -8   0  580.24   32.20
 -12  -8   0  530.65   30.50
  12  -8   0  521.05   30.60
  12   8   0  566.64   30.10
 -12   8   0  558.94   29.80
  12   8   0  551.44   28.30
 -12   8   0  541.95   30.50
  12   8   0  511.45   32.10
  12   8   0  535.75   30.00
 -12   8   0  537.45   27.80
 -13  -8   0  740.23   42.80
  13  -8   0  704.43   42.60
 -13  -8   0  821.52   40.90
 -13  -8   0  763.12   40.70
 -13  -8   0  776.12   41.80
  13  -8   0  854.11   44.70
  13  -8   0  801.42   42.40
  13  -8   0  801.42   41.60
  13   8   0  833.02   40.40
 -13   8   0  743.43   39.70
 -13   8   0  767.52   43.00
  13   8   0  828.02   42.60
  13   8   0  824.62   42.40
  13   8   0  814.12   45.20
 -14  -8   0  153.28   10.70
 -14  -8   0  151.48   13.20
 -14  -8   0  164.18   12.70
  14  -8   0  185.68   15.50
  14  -8   0  140.99   13.40
  14  -8   0  177.38   13.30
  14  -8   0  172.38   12.00
  14   8   0  174.28   12.80
 -14   8   0  149.99    9.60
 -14   8   0  183.18   13.50
  14   8   0  167.78   16.10
  14   8   0  174.68   10.50
 -14   8   0  162.28   12.10
  14   8   0  197.98   13.60
  15  -8   0  338.27   20.30
 -15  -8   0  336.77   19.00
  15  -8   0  376.86   23.90
  15  -8   0  320.77   21.90
  15  -8   0  340.97   21.30
 -15  -8   0  328.47   20.30
 -15   8   0  313.27   17.50
  15   8   0  352.76   21.70
  15   8   0  363.36   21.40
  15   8   0  326.37   24.40
  15   8   0  329.47   18.40
  16  -8   0   61.39    9.40
  16  -8   0   58.99    7.60
 -16  -8   0   53.49    5.70
  16  -8   0   62.59   10.40
 -16  -8   0   60.39    7.70
 -16  -8   0   50.39    7.20
  16  -8   0   67.99    8.80
 -16   8   0   50.79    3.80
 -16   8   0   55.69    3.80
  16   8   0   59.39    5.10
  16   8   0   76.39    9.80
  16   8   0   71.89    9.00
  16   8   0   58.79   11.30
 -17  -8   0   99.29    7.50
  17  -8   0  101.59   11.10
 -17  -8   0  103.59    9.40
 -17  -8   0   94.59    7.50
  17  -8   0  102.09    9.40
  17  -8   0   97.19   12.10
  17   8   0  107.29   11.90
  17   8   0   99.19    6.60
  17   8   0   86.59   15.90
  17   8   0  110.59   10.90
  18  -8   0   19.70    7.90
 -18  -8   0   33.30    4.30
  18  -8   0   38.10   10.00
 -18  -8   0   19.70    5.10
  18  -8   0   29.10    7.70
  18  -8   0   31.70    6.20
 -18  -8   0   29.80    4.00
  18   8   0   34.20    6.90
  18   8   0   39.10   10.30
  18   8   0   33.00    7.90
  19  -8   0  383.16   25.10
  19  -8   0  334.17   22.40
  19  -8   0  402.86   27.50
 -19  -8   0  353.36   19.20
  19  -8   0  373.36   23.90
  19  -8   0  339.97   24.10
 -19  -8   0  338.47   19.10
 -19  -8   0  386.46   22.00
  19   8   0  362.46   28.30
  19   8   0  420.66   25.70
  20  -8   0  117.19   15.50
  20  -8   0   84.99   10.90
  20  -8   0   71.59    9.90
  20  -8   0  103.59   13.10
  20  -8   0  101.99   12.60
  20   8   0   92.69   10.40
  20   8   0   83.59   14.40
  20   8   0   98.29   12.80
  21  -8   0   10.00    5.80
 -21  -8   0    2.50    2.20
  21  -8   0   -1.00    4.80
  21  -8   0   29.80   10.20
  21   8   0   10.50    7.20
  21   8   0    0.30    4.00
  21   8   0    8.40    8.80
  22  -8   0   -3.60    4.50
  22  -8   0   -0.70    5.40
  22   8   0   -3.00    5.70
  22   8   0   -0.80    3.90
  22   8   0  -13.90    8.30
   0  -9   0    1.20    1.60
   0  -9   0    2.50    2.10
   0  -9   0    0.50    2.40
   0  -9   0    1.00    2.20
   0  -9   0    0.90    2.20
   0   9   0    0.20    2.10
   0   9   0   -0.10    1.50
   0   9   0    1.90    2.40
   0   9   0    2.30    2.10
   0   9   0    1.40    2.70
   0   9   0    1.70    1.90
   1  -9   0  446.66   24.20
   1  -9   0  462.55   24.60
  -1  -9   0  460.35   24.20
  -1  -9   0  450.45   23.00
  -1  -9   0  487.75   24.50
  -1  -9   0  468.95   23.40
   1  -9   0  446.16   23.40
   1  -9   0  475.45   24.50
   1  -9   0  450.75   24.30
  -1  -9   0  467.45   24.50
   1   9   0  415.46   23.00
  -1   9   0  464.35   24.00
  -1   9   0  453.05   24.30
  -1   9   0  453.85   24.00
   1   9   0  462.55   23.80
  -1   9   0  465.75   24.70
   1   9   0  436.66   24.30
   1   9   0  471.65   24.30
   1   9   0  438.46   24.50
  -1   9   0  417.96   23.40
  -1   9   0  426.46   24.30
   1   9   0  433.16   24.10
  -1   9   0  455.05   23.70
  -2  -9   0  353.56   18.60
   2  -9   0  318.77   18.20
   2  -9   0  320.17   18.40
  -2  -9   0  334.77   17.30
   2  -9   0  333.07   17.80
   2  -9   0  313.37   18.60
  -2  -9   0  313.57   16.80
  -2  -9   0  317.17   18.50
  -2  -9   0  335.77   18.30
  -2  -9   0  341.47   18.60
   2  -9   0  341.57   18.60
  -2   9   0  343.57   18.90
   2   9   0  275.77   18.20
  -2   9   0  354.16   17.80
  -2   9   0  328.07   17.90
  -2   9   0  322.27   17.80
   2   9   0  309.57   16.90
  -2   9   0  318.07   18.30
   2   9   0  322.87   17.80
  -2   9   0  327.57   18.70
  -2   9   0  341.97   18.20
   2   9   0  317.77   18.20
   2   9   0  357.16   18.50
   3  -9   0 1347.47   63.09
  -3  -9   0 1306.97   63.09
  -3  -9   0 1262.77   61.49
   3  -9   0 1214.08   62.99
   3  -9   0 1229.58   61.89
  -3  -9   0 1238.58   62.39
   3  -9   0 1202.38   62.29
   3  -9   0 1254.27   62.19
  -3  -9   0 1226.88   62.69
  -3  -9   0 1201.68   60.79
   3  -9   0 1294.27   62.89
  -3  -9   0 1301.07   62.69
  -3   9   0 1256.47   62.29
   3   9   0 1183.18   62.89
   3   9   0 1133.99   62.59
   3   9   0 1248.78   61.79
  -3   9   0 1254.37   61.99
  -3   9   0 1296.97   61.99
  -3   9   0 1295.97   62.79
   3   9   0 1224.18   60.99
   3   9   0 1208.68   62.49
  -3   9   0 1334.57   62.39
   3   9   0 1222.88   62.49
   3   9   0 1251.07   62.19
  -3   9   0 1266.77   63.19
   4  -9   0 1402.96   71.79
   4  -9   0 1401.96   71.29
   4  -9   0 1386.66   71.19
  -4  -9   0 1504.15   71.59
   4  -9   0 1507.05   72.19
  -4  -9   0 1458.35   69.49
   4  -9   0 1347.87   71.89
  -4  -9   0 1457.95   71.39
  -4  -9   0 1530.75   72.29
  -4  -9   0 1509.35   70.59
   4  -9   0 1385.56   70.79
  -4  -9   0 1416.76   71.69
  -4   9   0 1439.56   71.69
  -4   9   0 1465.25   70.79
  -4   9   0 1516.15   71.19
   4   9   0 1496.25   70.89
   4   9   0 1258.57   71.39
   4   9   0 1452.25   69.69
   4   9   0 1345.27   71.99
   4   9   0 1371.36   71.39
   4   9   0 1456.45   71.59
  -4   9   0 1472.65   71.49
   4   9   0 1380.66   70.99
  -4   9   0 1477.65   70.79
   5  -9   0 3318.47  161.58
  -5  -9   0 3397.26  162.18
   5  -9   0 3301.77  161.88
  -5  -9   0 3289.47  161.98
  -5  -9   0 3376.16  161.38
   5  -9   0 3136.19  162.48
  -5  -9   0 3831.32  165.28
  -5  -9   0 3540.75  162.68
   5  -9   0 3065.69  162.68
   5  -9   0 3073.79  161.98
  -5   9   0 3585.84  163.78
  -5   9   0 3469.55  161.48
  -5   9   0 3355.66  161.78
   5   9   0 3309.17  162.28
  -5   9   0 3295.17  161.38
   5   9   0 3214.68  161.78
   5   9   0 2849.42  162.08
   5   9   0 3322.77  161.48
   5   9   0 2934.51  162.68
  -5   9   0 3840.22  164.38
   6  -9   0   13.80    3.90
  -6  -9   0   14.50    3.20
   6  -9   0    7.40    3.20
  -6  -9   0   16.30    3.30
  -6  -9   0   10.70    3.80
  -6  -9   0   16.10    4.00
   6  -9   0    9.40    2.60
  -6  -9   0   11.50    2.70
   6  -9   0   16.50    4.10
   6  -9   0   10.20    3.30
  -6   9   0   12.70    3.50
   6   9   0   12.50    3.50
  -6   9   0   12.50    2.40
  -6   9   0   11.90    2.70
   6   9   0   12.10    2.80
  -6   9   0    7.60    2.30
   6   9   0   14.10    3.30
   6   9   0    9.40    3.80
   6   9   0   13.60    2.90
  -6   9   0   17.30    3.70
   7  -9   0   16.20    3.90
  -7  -9   0   19.20    3.50
   7  -9   0   16.10    4.00
   7  -9   0   18.70    3.30
   7  -9   0   20.40    4.90
  -7  -9   0   20.30    4.30
  -7  -9   0   23.50    3.90
  -7  -9   0   22.20    3.80
   7  -9   0   13.50    3.60
  -7   9   0   14.90    3.40
   7   9   0   14.50    3.80
  -7   9   0   19.60    4.00
   7   9   0   14.10    2.90
  -7   9   0   20.30    3.20
  -7   9   0   22.80    3.10
  -7   9   0   22.40    3.40
   7   9   0   13.80    3.10
   7   9   0   21.40    4.30
   7   9   0   12.60    4.10
   8  -9   0   20.70    5.20
   8  -9   0   27.10    4.90
  -8  -9   0   41.40    4.90
   8  -9   0   19.70    3.30
  -8  -9   0   27.20    4.90
  -8  -9   0   31.50    4.50
   8  -9   0   16.70    4.70
  -8   9   0   28.20    4.40
  -8   9   0   18.30    4.30
   8   9   0   30.40    4.60
  -8   9   0   23.10    3.10
   8   9   0   23.30    3.90
   8   9   0   26.90    4.50
   8   9   0   22.60    3.70
  -8   9   0   20.50    3.40
  -8   9   0   24.20    3.60
  -9  -9   0  294.57   16.70
  -9  -9   0  303.07   16.80
   9  -9   0  273.67   18.60
  -9  -9   0  301.97   17.20
   9  -9   0  302.97   19.00
   9  -9   0  273.47   16.30
   9  -9   0  252.47   17.60
   9  -9   0  315.37   18.30
  -9  -9   0  300.07   17.50
   9  -9   0  256.67   17.20
   9   9   0  278.47   17.00
   9   9   0  289.27   19.10
  -9   9   0  289.07   17.60
  -9   9   0  285.57   17.30
   9   9   0  287.27   16.80
  -9   9   0  275.07   16.00
   9   9   0  276.27   16.20
  -9   9   0  289.37   16.00
  -9   9   0  304.07   15.50
  10  -9   0  177.78   13.10
  10  -9   0  138.99   11.40
 -10  -9   0  153.08   10.40
  10  -9   0  170.48   10.40
 -10  -9   0  159.28   11.60
  10  -9   0  136.09   11.80
 -10  -9   0  158.68   11.30
 -10  -9   0  147.39   10.40
  10  -9   0  158.48   13.20
 -10   9   0  153.68    9.70
 -10   9   0  154.38   11.60
  10   9   0  148.19   13.20
 -10   9   0  143.79   11.10
  10   9   0  143.99   10.00
  10   9   0  147.29   11.20
 -10   9   0  161.38    9.10
  10   9   0  176.78   11.30
 -11  -9   0  362.96   21.10
  11  -9   0  325.67   21.00
 -11  -9   0  361.86   20.10
 -11  -9   0  370.86   21.40
  11  -9   0  303.17   21.30
  11  -9   0  365.66   20.20
 -11  -9   0  369.76   20.10
  11  -9   0  384.16   23.30
  11   9   0  339.97   22.50
  11   9   0  366.96   23.50
 -11   9   0  353.76   19.20
 -11   9   0  337.37   20.80
 -11   9   0  340.97   18.40
  11   9   0  368.26   21.20
  11   9   0  392.26   21.20
 -11   9   0  350.36   21.50
 -12  -9   0  240.28   14.20
 -12  -9   0  234.88   15.80
 -12  -9   0  226.08   14.20
  12  -9   0  241.58   14.60
  12  -9   0  228.78   15.70
 -12  -9   0  245.58   15.70
  12  -9   0  211.38   16.00
  12  -9   0  257.67   17.80
 -12   9   0  223.28   15.10
  12   9   0  251.67   15.70
  12   9   0  217.38   17.80
 -12   9   0  221.08   12.00
 -12   9   0  231.28   13.30
  12   9   0  216.48   15.20
 -12   9   0  241.58   16.00
 -13  -9   0    8.30    4.50
  13  -9   0   11.70    5.20
 -13  -9   0   16.40    3.40
 -13  -9   0   13.70    5.20
 -13  -9   0   18.40    3.90
  13  -9   0   16.30    4.30
  13  -9   0   21.40    6.90
  13  -9   0   16.50    5.10
 -13   9   0   17.60    3.00
  13   9   0   19.70    4.90
  13   9   0    6.40    4.40
  13   9   0   11.40    6.20
 -13   9   0   11.10    4.60
 -13   9   0   15.50    4.20
 -14  -9   0  276.97   18.50
  14  -9   0  255.37   17.70
 -14  -9   0  254.67   15.80
 -14  -9   0  257.87   17.20
  14  -9   0  268.87   16.60
  14  -9   0  286.77   19.00
 -14  -9   0  267.17   15.80
  14  -9   0  286.27   20.20
 -14   9   0  234.98   16.70
  14   9   0  256.37   20.60
 -14   9   0  287.77   18.50
  14   9   0  274.57   17.90
 -14   9   0  257.37   14.60
  14   9   0  260.97   18.30
  14   9   0  287.07   17.80
  15  -9   0   39.50    7.60
  15  -9   0   54.69    6.70
 -15  -9   0   33.10    7.00
 -15  -9   0   20.50    5.30
  15  -9   0   49.99    7.70
  15  -9   0   43.40    9.00
  15   9   0   41.80    7.00
 -15   9   0   47.30    4.10
  15   9   0   39.10    7.30
  15   9   0   25.90    8.30
  15   9   0   41.30    4.80
  16  -9   0  533.35   30.60
  16  -9   0  484.25   27.50
 -16  -9   0  427.66   26.10
 -16  -9   0  429.46   24.30
  16  -9   0  470.35   28.50
  16  -9   0  477.45   28.20
 -16  -9   0  407.06   24.10
  16  -9   0  430.06   25.60
  16   9   0  449.36   24.00
 -16   9   0  447.66   22.50
  16   9   0  483.05   27.70
  16   9   0  434.86   30.30
  16   9   0  459.25   26.90
 -16   9   0  428.86   22.50
  17  -9   0  325.37   20.90
  17  -9   0  398.26   25.70
 -17  -9   0  323.97   19.10
 -17  -9   0  324.57   19.00
  17  -9   0  358.06   22.60
 -17  -9   0  333.37   21.00
  17  -9   0  341.87   23.10
  17  -9   0  326.57   23.50
  17   9   0  380.26   22.30
  17   9   0  406.06   23.50
  17   9   0  302.17   30.80
  17   9   0  334.67   18.60
  18  -9   0    8.50    7.20
  18  -9   0    5.50    5.80
 -18  -9   0    6.90    4.30
  18  -9   0    7.60    5.60
 -18  -9   0   10.80    2.80
  18  -9   0    8.40    5.80
  18  -9   0   14.60    4.70
 -18  -9   0    4.70    2.40
  18   9   0    5.30    4.80
  18   9   0    5.70    8.10
  18   9   0   10.10    6.20
  18   9   0    7.10    2.10
  19  -9   0   -0.80    6.30
 -19  -9   0    3.80    3.90
  19  -9   0    7.50    5.00
 -19  -9   0    1.10    2.40
  19  -9   0   -4.50    5.00
 -19  -9   0    0.60    2.20
  19  -9   0   17.20    6.70
  19   9   0   -0.50    3.90
  19   9   0    8.40    5.80
  19   9   0   -6.10    7.20
  20  -9   0   -1.40    5.30
 -20  -9   0    6.10    3.20
  20  -9   0   -5.50    5.20
  20  -9   0    7.80    7.90
  20   9   0   -5.80    7.40
  20   9   0    0.70    4.00
  20   9   0    7.10    6.40
  21  -9   0   67.59   12.70
  21  -9   0   88.79   11.40
  21  -9   0   79.29   11.60
  21   9   0   69.49    9.40
  21   9   0   78.79   11.80
  21   9   0   70.69   14.50
  22  -9   0   17.10    6.60
  22  -9   0   -4.30    9.30
 -22  -9   0   -4.60    3.10
  22  -9   0    1.20    5.20
  22   9   0    3.40    4.30
  22   9   0    2.40    6.60
   0 -10   0  461.05   27.00
   0 -10   0  528.95   27.30
   0 -10   0  554.94   27.40
   0 -10   0  499.35   27.40
   0 -10   0  542.45   26.10
   0  10   0  483.65   27.00
   0  10   0  485.05   27.40
   0  10   0  493.75   26.50
   0  10   0  532.35   27.20
   0  10   0  454.25   26.00
   0  10   0  542.05   27.10
   1 -10   0  977.50   50.79
  -1 -10   0 1029.00   50.49
   1 -10   0  996.70   50.49
  -1 -10   0 1005.80   50.69
   1 -10   0 1043.80   49.70
  -1 -10   0 1002.50   49.20
  -1 -10   0 1002.70   50.69
   1 -10   0  915.61   50.29
   1 -10   0 1072.69   50.79
  -1 -10   0  928.21   50.39
  -1 -10   0 1052.99   49.60
   1  10   0  929.01   50.29
   1  10   0 1016.10   50.39
  -1  10   0 1038.50   51.09
   1  10   0  926.81   50.69
  -1  10   0  943.91   49.60
  -1  10   0 1022.80   50.29
  -1  10   0 1011.90   50.19
  -1  10   0  945.21   50.59
  -1  10   0  988.80   50.49
   1  10   0  959.80   50.59
   1  10   0 1028.60   50.09
   1  10   0  936.81   49.20
  -1  10   0 1060.59   49.99
   2 -10   0 3755.82  174.38
  -2 -10   0 3480.35  174.98
   2 -10   0 3387.86  174.68
  -2 -10   0 3772.22  173.88
   2 -10   0 3488.45  175.28
   2 -10   0 3634.14  175.18
  -2 -10   0 3711.43  174.98
   2 -10   0 3722.33  175.18
  -2 -10   0 3723.03  175.18
  -2 -10   0 3603.34  173.38
  -2 -10   0 3637.24  175.18
  -2  10   0 3620.64  174.68
   2  10   0 3296.27  174.98
   2  10   0 3344.57  174.78
  -2  10   0 3442.26  175.18
   2  10   0 3322.27  175.08
  -2  10   0 3733.13  174.38
  -2  10   0 3937.71  175.78
  -2  10   0 3359.66  174.28
   2  10   0 3692.53  174.98
   2  10   0 3710.73  174.58
  -2  10   0 3677.53  174.48
   2  10   0 3423.16  173.48
  -2  10   0 3543.25  174.98
   3 -10   0 1946.31  100.69
  -3 -10   0 2101.59  100.19
   3 -10   0 2070.59   99.79
  -3 -10   0 2113.59  100.69
   3 -10   0 1949.20   99.99
  -3 -10   0 2107.09   99.09
   3 -10   0 2065.79  100.59
  -3 -10   0 1997.60  100.39
  -3 -10   0 2130.49  100.39
   3 -10   0 2066.89  100.49
  -3 -10   0 2012.30   98.39
   3  10   0 2076.69   99.49
  -3  10   0 2082.49   99.89
   3  10   0 1993.80   98.59
  -3  10   0 1977.90  100.29
   3  10   0 1929.21  100.39
  -3  10   0 1943.71   99.79
   3  10   0 1985.20   99.69
   3  10   0 1916.11  100.09
   3  10   0 2034.60  100.19
  -3  10   0 2083.39   99.69
  -3  10   0 2098.89   99.59
  -3  10   0 1964.00  100.69
   4 -10   0  763.22   41.90
  -4 -10   0  915.21   44.00
   4 -10   0  801.72   41.30
  -4 -10   0  831.62   41.40
  -4 -10   0  837.82   40.40
  -4 -10   0  865.11   42.00
   4 -10   0  770.62   40.60
   4 -10   0  831.52   41.90
   4 -10   0  797.92   41.20
  -4 -10   0  821.12   39.30
  -4 -10   0  820.62   42.60
   4  10   0  784.52   41.60
   4  10   0  808.92   40.60
  -4  10   0  804.52   42.30
   4  10   0  771.92   41.00
   4  10   0  779.72   41.40
  -4  10   0  834.92   40.80
   4  10   0  763.02   42.00
   4  10   0  712.53   41.50
   4  10   0  825.62   39.50
  -4  10   0  822.22   41.10
  -4  10   0  680.73   43.90
  -4  10   0  826.72   40.70
  -5 -10   0  720.73   36.80
  -5 -10   0  732.73   35.90
  -5 -10   0  734.33   36.90
   5 -10   0  689.43   37.50
   5 -10   0  690.93   37.30
   5 -10   0  697.33   36.80
  -5 -10   0  761.42   37.50
  -5 -10   0  726.13   37.80
   5 -10   0  673.13   36.10
   5 -10   0  690.03   36.60
   5 -10   0  761.22   37.90
   5  10   0  674.63   37.70
  -5  10   0  730.93   36.10
   5  10   0  693.73   36.10
   5  10   0  710.53   36.90
  -5  10   0  744.53   36.50
  -5  10   0  756.22   37.10
   5  10   0  653.43   38.00
   5  10   0  634.74   36.90
   5  10   0  663.33   36.30
  -5  10   0  719.63   36.10
  -5  10   0  709.83   37.10
  -6 -10   0  472.05   25.30
   6 -10   0  471.35   24.10
  -6 -10   0  456.95   24.70
  -6 -10   0  479.25   24.70
   6 -10   0  446.66   24.90
   6 -10   0  440.76   25.30
   6 -10   0  438.46   25.70
   6 -10   0  431.06   25.50
  -6 -10   0  449.56   24.00
  -6 -10   0  460.25   25.90
   6  10   0  403.56   25.50
  -6  10   0  445.46   24.20
  -6  10   0  458.95   23.90
  -6  10   0  481.05   25.20
  -6  10   0  471.95   25.20
   6  10   0  447.46   24.90
   6  10   0  439.46   24.10
  -6  10   0  464.35   23.90
   6  10   0  468.55   25.40
  -7 -10   0  724.93   36.50
  -7 -10   0  737.63   36.80
   7 -10   0  707.93   36.20
  -7 -10   0  726.63   37.50
   7 -10   0  683.53   37.80
  -7 -10   0  746.33   36.90
   7 -10   0  732.53   38.30
   7 -10   0  688.13   37.70
   7 -10   0  612.74   36.80
  -7  10   0  745.83   36.00
   7  10   0  727.63   37.30
   7  10   0  653.83   38.10
   7  10   0  730.93   36.50
  -7  10   0  712.83   37.40
  -7  10   0  700.53   37.30
   7  10   0  653.43   37.10
  -7  10   0  688.43   36.00
  -7  10   0  724.53   36.40
  -8 -10   0  272.27   16.00
   8 -10   0  257.27   16.60
   8 -10   0  308.17   18.20
   8 -10   0  254.07   16.90
  -8 -10   0  280.27   16.00
   8 -10   0  290.87   15.70
  -8 -10   0  243.88   16.40
  -8 -10   0  275.27   16.00
   8 -10   0  275.17   17.30
  -8  10   0  275.47   16.80
   8  10   0  275.37   15.70
   8  10   0  240.48   17.60
  -8  10   0  278.47   15.30
  -8  10   0  274.47   15.50
  -8  10   0  276.87   15.00
   8  10   0  273.37   16.50
   8  10   0  251.87   17.80
  -8  10   0  261.07   16.50
   8  10   0  267.97   15.80
   9 -10   0  157.48   12.20
  -9 -10   0  163.68   10.90
   9 -10   0  159.38   10.40
   9 -10   0  198.38   13.80
   9 -10   0  146.09   11.50
   9 -10   0  156.18   12.80
  -9 -10   0  173.78   12.00
  -9 -10   0  160.78   11.00
  -9 -10   0  155.88   10.80
   9 -10   0  161.38   12.20
  -9  10   0  161.48   10.20
  -9  10   0  158.68   10.10
   9  10   0  164.68   10.90
   9  10   0  147.49   11.40
  -9  10   0  166.98   11.70
   9  10   0  148.59   10.40
  -9  10   0  169.78    9.80
   9  10   0  143.79   12.90
   9  10   0  151.68   11.20
  -9  10   0  168.88   12.00
 -10 -10   0   33.60    5.00
  10 -10   0   34.70    6.50
  10 -10   0   19.70    5.00
 -10 -10   0   41.10    6.60
  10 -10   0   31.70    4.50
  10 -10   0   26.00    6.70
 -10 -10   0   38.30    4.90
  10 -10   0   33.50    5.90
  10 -10   0   21.70    5.00
 -10 -10   0   34.50    5.60
 -10  10   0   31.50    5.80
 -10  10   0   37.80    3.90
 -10  10   0   38.40    6.30
 -10  10   0   31.70    4.30
  10  10   0   29.70    6.60
  10  10   0   24.10    4.90
  10  10   0   28.20    4.30
  10  10   0   36.00    5.30
  11 -10   0  517.45   28.60
  11 -10   0  538.45   31.70
  11 -10   0  477.65   30.20
  11 -10   0  478.15   29.60
 -11 -10   0  538.65   28.90
  11 -10   0  565.94   31.90
 -11 -10   0  571.24   30.00
  11 -10   0  527.35   30.70
 -11 -10   0  488.15   28.50
  11  10   0  567.54   28.70
 -11  10   0  515.65   29.70
 -11  10   0  551.74   30.50
  11  10   0  537.15   29.90
 -11  10   0  525.95   27.30
 -11  10   0  526.35   28.00
  11  10   0  632.94   30.00
  11  10   0  539.95   32.00
 -12 -10   0    7.60    3.00
  12 -10   0    8.80    5.50
  12 -10   0    5.80    4.50
  12 -10   0    5.90    3.30
  12 -10   0    4.50    5.30
 -12 -10   0    8.20    4.40
 -12 -10   0    6.10    3.20
  12 -10   0    8.40    4.80
 -12 -10   0    8.90    4.60
 -12  10   0    5.00    2.60
 -12  10   0    5.80    1.80
  12  10   0    5.00    4.10
  12  10   0    4.60    5.50
  12  10   0   11.90    4.30
 -12  10   0   11.10    4.00
  12  10   0    4.80    2.80
 -12  10   0   11.50    5.40
 -13 -10   0  567.64   33.00
 -13 -10   0  608.94   31.80
  13 -10   0  588.14   32.10
  13 -10   0  647.74   35.80
  13 -10   0  595.34   37.10
  13 -10   0  602.94   34.40
  13 -10   0  553.24   34.00
  13 -10   0  550.04   33.30
 -13 -10   0  577.94   33.60
 -13 -10   0  582.14   31.80
 -13  10   0  564.04   30.70
  13  10   0  630.24   31.80
 -13  10   0  604.44   33.90
  13  10   0  674.93   33.60
  13  10   0  630.64   33.50
 -13  10   0  601.34   33.20
  13  10   0  574.04   35.90
  14 -10   0   72.39    7.60
  14 -10   0   85.39   12.40
 -14 -10   0   81.79    7.20
  14 -10   0   76.09   10.10
 -14 -10   0   85.69    9.20
  14 -10   0   70.59    9.10
 -14 -10   0   79.49    9.30
  14 -10   0   84.29    9.90
 -14 -10   0   87.09    7.40
 -14  10   0   81.39    6.20
  14  10   0   97.79    9.60
  14  10   0   76.69    9.10
  14  10   0   76.99    7.00
  14  10   0   75.69   11.60
 -15 -10   0   87.09    9.40
  15 -10   0   91.19    8.00
 -15 -10   0   74.39    6.90
  15 -10   0   76.99   11.60
  15 -10   0   92.49   10.60
  15 -10   0   91.79   10.30
  15 -10   0   74.89   10.50
  15  10   0   88.59    9.70
  15  10   0   92.39   10.30
 -15  10   0   76.59    5.90
  15  10   0   86.59    7.20
  15  10   0   77.89   12.20
  16 -10   0   17.70    6.20
 -16 -10   0   20.70    3.90
  16 -10   0   22.70    7.80
  16 -10   0   19.50    6.60
 -16 -10   0   27.10    4.20
  16 -10   0   25.80    5.10
 -16 -10   0   25.50    5.80
  16 -10   0   21.60    6.50
  16  10   0   23.60    8.70
  16  10   0   20.00    3.70
  16  10   0   31.90    7.20
 -16  10   0   22.50    2.80
  16  10   0   28.70    6.50
 -17 -10   0   72.59    6.90
  17 -10   0   59.99   11.60
  17 -10   0   78.29   10.40
  17 -10   0   86.89   11.20
 -17 -10   0   99.79    9.80
 -17 -10   0   78.29    6.80
  17 -10   0   97.89    9.00
  17 -10   0   66.49   11.70
  17  10   0   79.99    7.80
  17  10   0   90.39   10.50
  17  10   0   67.19   12.30
  17  10   0   99.59   11.40
  18 -10   0  345.07   24.20
 -18 -10   0  322.57   19.30
  18 -10   0  342.17   21.70
  18 -10   0  337.27   24.50
  18 -10   0  386.16   24.40
 -18 -10   0  369.16   22.30
  18 -10   0  364.56   26.10
  18  10   0  362.46   19.40
  18  10   0  367.46   23.00
  18  10   0  371.76   24.00
  18  10   0  385.36   28.30
  19 -10   0  117.09   13.90
  19 -10   0  123.69   13.40
 -19 -10   0  108.99    8.10
  19 -10   0  136.69   16.60
  19 -10   0  108.79   10.30
 -19 -10   0  116.69   11.00
  19 -10   0  121.19   13.70
  19  10   0  102.69   11.30
  19  10   0  117.59   13.40
  19  10   0  133.39   17.60
 -20 -10   0    6.50    4.00
  20 -10   0    1.80    5.80
  20 -10   0    8.50    8.20
  20 -10   0   -4.00    4.90
  20  10   0   -1.50    3.80
  20  10   0    7.10    6.40
  20  10   0   -1.00    7.80
  21 -10   0   51.89   12.30
  21 -10   0   40.80    8.90
  21 -10   0   46.20    9.10
  21  10   0   39.60   12.00
  21  10   0   37.80    7.20
  21  10   0   47.40    9.60
  22 -10   0   85.39   14.20
  22 -10   0   63.19   11.10
  22 -10   0   71.69   10.20
  22  10   0   74.69   11.60
  22  10   0   61.29   14.80
  22  10   0   79.79   10.00
   0 -11   0    9.10    3.20
   0 -11   0   -0.10    1.90
   0 -11   0    1.40    2.60
   0 -11   0    1.30    2.90
   0 -11   0    3.60    2.90
   0  11   0    0.60    3.10
   0  11   0    0.80    2.30
   0  11   0   -0.90    2.20
   0  11   0    2.70    2.70
   0  11   0    0.10    1.90
   0  11   0   -0.30    2.80
   0  11   0   -0.20    2.60
   1 -11   0  501.45   26.00
  -1 -11   0  471.35   25.90
   1 -11   0  506.25   24.90
   1 -11   0  515.05   26.10
   1 -11   0  404.16   25.40
  -1 -11   0  416.66   25.60
  -1 -11   0  487.25   24.30
  -1 -11   0  459.55   25.70
  -1 -11   0  456.65   24.60
  -1 -11   0  471.05   25.90
   1 -11   0  479.05   26.20
  -1  11   0  525.25   25.70
   1  11   0  467.25   25.60
  -1  11   0  438.76   25.80
  -1  11   0  516.55   25.70
   1  11   0  485.25   25.30
  -1  11   0  511.05   25.30
  -1  11   0  490.45   26.40
   1  11   0  430.76   25.50
   1  11   0  446.56   24.40
  -1  11   0  470.45   25.80
  -1  11   0  436.86   24.70
   1  11   0  465.95   26.10
   1  11   0  465.35   26.00
  -2 -11   0  514.45   25.40
   2 -11   0  503.25   25.90
  -2 -11   0  451.95   26.60
   2 -11   0  464.75   28.70
  -2 -11   0  513.25   26.70
   2 -11   0  532.75   27.10
   2 -11   0  466.55   26.40
   2 -11   0  486.45   27.10
  -2 -11   0  494.65   24.90
  -2  11   0  469.55   26.20
  -2  11   0  486.65   27.10
  -2  11   0  477.95   26.60
   2  11   0  509.15   27.20
   2  11   0  481.35   25.10
  -2  11   0  500.75   26.20
  -2  11   0  506.65   26.00
   2  11   0  455.15   26.40
  -2  11   0  534.15   27.50
  -2  11   0  484.95   26.00
   2  11   0  453.95   26.80
  -3 -11   0   59.89    6.90
   3 -11   0   60.39    6.50
  -3 -11   0   56.79    4.70
  -3 -11   0   56.79    6.10
  -3 -11   0   57.99    4.10
   3 -11   0   63.19    6.60
   3 -11   0   54.19    6.30
   3 -11   0   57.89    5.80
  -3 -11   0   60.89    6.80
   3 -11   0   53.39    6.60
  -3 -11   0   54.69    6.00
   3  11   0   58.59    6.00
  -3  11   0   53.89    7.30
   3  11   0   57.49    8.30
  -3  11   0   52.29    6.80
  -3  11   0   61.79    5.50
  -3  11   0   56.29    5.70
  -3  11   0   60.29    6.50
   3  11   0   62.19    4.40
   3  11   0   47.10    6.60
   3  11   0   57.49    6.10
  -3  11   0   56.99    5.50
   3  11   0   39.20    5.70
   4 -11   0 1801.82   88.69
  -4 -11   0 1783.72   85.89
   4 -11   0 1661.73   87.79
   4 -11   0 1805.52   88.59
  -4 -11   0 1841.92   88.89
   4 -11   0 1772.22   88.89
   4 -11   0 1832.52   87.89
  -4 -11   0 1797.12   88.09
  -4 -11   0 1788.12   88.19
  -4 -11   0 1765.12   88.49
  -4 -11   0 1783.22   86.89
   4  11   0 1814.12   86.19
  -4  11   0 1839.32   88.49
  -4  11   0 1775.92   87.79
  -4  11   0 1777.62   89.09
   4  11   0 1727.43   87.69
   4  11   0 1804.42   87.39
  -4  11   0 1809.42   87.39
  -4  11   0 1808.92   87.99
   4  11   0 1580.54   88.19
   4  11   0 1588.24   88.49
   4  11   0 1752.92   88.19
  -4  11   0 1837.52   87.49
   4  11   0 1749.92   88.19
   5 -11   0  427.76   23.40
  -5 -11   0  402.36   22.40
  -5 -11   0  422.56   23.40
  -5 -11   0  400.66   20.00
  -5 -11   0  396.76   21.30
  -5 -11   0  411.76   22.50
  -5 -11   0  410.86   23.00
   5 -11   0  391.46   21.70
   5 -11   0  408.36   23.10
   5 -11   0  400.26   23.30
   5 -11   0  418.66   22.50
   5 -11   0  398.26   22.30
   5  11   0  398.06   22.00
   5  11   0  442.26   22.90
   5  11   0  420.16   21.80
   5  11   0  351.76   22.60
   5  11   0  351.06   23.00
   5  11   0  412.66   22.80
  -5  11   0  419.36   21.80
  -5  11   0  398.66   22.70
  -5  11   0  399.66   21.60
  -5  11   0  400.36   22.10
  -5  11   0  406.16   22.60
  -6 -11   0  565.44   30.00
   6 -11   0  597.84   31.40
   6 -11   0  576.74   29.40
  -6 -11   0  541.55   31.00
  -6 -11   0  578.54   30.80
   6 -11   0  587.04   31.00
   6 -11   0  566.24   30.20
  -6 -11   0  573.94   30.10
  -6 -11   0  561.14   29.20
   6 -11   0  572.74   31.10
  -6  11   0  548.05   29.20
   6  11   0  540.05   29.70
  -6  11   0  562.34   29.20
  -6  11   0  584.74   29.70
   6  11   0  469.05   30.10
   6  11   0  518.85   31.00
  -6  11   0  583.74   30.60
  -6  11   0  572.24   30.40
   6  11   0  566.74   29.40
   6  11   0  563.14   30.40
   7 -11   0  534.35   29.90
  -7 -11   0  557.44   29.70
  -7 -11   0  550.94   31.10
   7 -11   0  521.85   30.40
  -7 -11   0  544.05   30.30
   7 -11   0  563.34   31.10
   7 -11   0  570.64   29.10
  -7 -11   0  549.74   29.10
   7 -11   0  543.95   30.80
  -7 -11   0  547.75   29.70
  -7  11   0  605.54   29.00
   7  11   0  570.44   29.30
  -7  11   0  566.74   28.90
  -7  11   0  578.84   30.40
   7  11   0  540.35   30.00
  -7  11   0  557.84   29.20
   7  11   0  547.35   29.40
   7  11   0  496.95   30.90
   7  11   0  496.15   31.00
  -7  11   0  593.44   30.40
  -8 -11   0   73.19    6.50
  -8 -11   0   77.39    8.00
   8 -11   0   75.79    6.40
  -8 -11   0   66.19    6.90
   8 -11   0   67.59    7.90
   8 -11   0   69.29    7.60
   8 -11   0   74.29    8.10
  -8 -11   0   74.69    7.00
   8 -11   0   83.19    8.60
  -8  11   0   80.99    6.50
   8  11   0   69.89    7.10
   8  11   0   65.19    8.80
   8  11   0   47.60    6.70
  -8  11   0   74.29    6.00
  -8  11   0   88.39    8.10
  -8  11   0   78.59    7.60
  -8  11   0   77.09    6.20
   8  11   0   70.69    6.60
   8  11   0   69.39    6.60
  -9 -11   0   24.90    6.50
  -9 -11   0   19.20    3.80
   9 -11   0   21.90    5.80
   9 -11   0   14.40    5.50
   9 -11   0   23.50    6.30
  -9 -11   0   17.30    3.90
   9 -11   0   11.00    4.30
  -9 -11   0   21.10    4.30
   9 -11   0   18.10    5.20
   9 -11   0   19.60    3.80
   9  11   0   24.00    4.20
   9  11   0   20.50    5.90
  -9  11   0   24.90    3.90
  -9  11   0   22.30    5.10
   9  11   0   21.10    4.60
  -9  11   0   24.20    3.90
   9  11   0   18.10    4.20
   9  11   0    8.20    3.90
  -9  11   0   21.40    4.90
  -9  11   0   25.40    3.50
 -10 -11   0    1.80    2.90
  10 -11   0    0.90    2.70
 -10 -11   0    2.10    3.70
  10 -11   0    0.40    3.80
  10 -11   0   -0.40    3.90
  10 -11   0    7.90    4.60
  10 -11   0    1.00    4.80
  10 -11   0    2.40    4.00
 -10 -11   0    0.90    2.60
 -10 -11   0    1.50    2.50
  10  11   0   -0.10    4.90
 -10  11   0    4.00    3.70
  10  11   0    0.50    3.20
  10  11   0    4.10    4.20
 -10  11   0    7.90    4.00
  10  11   0    8.20    4.10
 -10  11   0    5.70    2.90
 -10  11   0    2.60    2.50
 -10  11   0    1.60    2.00
  10  11   0    3.70    2.70
 -11 -11   0   28.00    5.60
 -11 -11   0   27.60    4.70
 -11 -11   0   21.10    5.40
  11 -11   0   23.50    7.00
  11 -11   0   15.20    5.20
  11 -11   0   13.50    4.70
  11 -11   0   30.00    7.40
 -11 -11   0   22.60    4.40
  11 -11   0   21.00    4.10
  11 -11   0   22.70    5.60
 -11  11   0   22.50    3.90
  11  11   0   18.70    6.80
  11  11   0   24.90    5.40
  11  11   0   24.50    4.90
  11  11   0   28.00    4.50
 -11  11   0   26.30    3.50
 -11  11   0   33.10    7.40
  12 -11   0   47.70    7.40
  12 -11   0   74.89    9.40
 -12 -11   0   59.79    7.60
 -12 -11   0   50.89    5.80
  12 -11   0   44.40    8.50
  12 -11   0   80.89   10.40
  12 -11   0   61.59    6.40
  12 -11   0   39.20    7.00
 -12 -11   0   51.89    6.30
 -12 -11   0   48.50    7.50
 -12  11   0   49.70    5.40
 -12  11   0   53.49    7.70
  12  11   0   54.39    7.20
  12  11   0   59.39    9.80
 -12  11   0   63.19    7.90
  12  11   0   44.90    5.80
 -12  11   0   60.59    4.70
  12  11   0   49.60    7.10
 -13 -11   0  386.76   23.40
 -13 -11   0  409.26   23.80
  13 -11   0  401.96   22.10
  13 -11   0  410.66   25.90
 -13 -11   0  379.56   21.80
  13 -11   0  411.96   24.80
  13 -11   0  360.26   24.30
  13 -11   0  335.67   23.00
 -13 -11   0  364.26   21.70
 -13  11   0  377.46   19.70
  13  11   0  393.66   21.90
  13  11   0  399.56   23.20
  13  11   0  393.66   23.60
 -13  11   0  377.16   20.80
  13  11   0  385.76   26.30
 -14 -11   0   75.79    8.00
  14 -11   0   96.59    8.40
 -14 -11   0   93.59    9.80
  14 -11   0   66.59    9.60
  14 -11   0   89.09   10.30
  14 -11   0   99.89   10.70
 -14 -11   0   90.99   10.60
 -14 -11   0   87.99    7.80
  14 -11   0   85.39   11.70
  14  11   0  107.29    9.80
 -14  11   0   79.09    6.50
  14  11   0   93.09    7.90
  14  11   0   73.79   11.50
  14  11   0  102.49   10.20
 -15 -11   0   98.69    8.20
  15 -11   0  114.89    9.30
  15 -11   0  113.29   12.20
  15 -11   0  111.79   14.10
  15 -11   0  106.99   11.50
  15 -11   0   98.39   11.10
 -15 -11   0  101.29   10.50
  15  11   0   92.49   10.40
  15  11   0  114.49   11.10
 -15  11   0  111.29    7.40
  15  11   0  108.49   14.60
  15  11   0  106.79    8.50
  16 -11   0   29.00    7.40
  16 -11   0   34.80    7.50
 -16 -11   0   28.30    4.80
 -16 -11   0   18.40    6.00
 -16 -11   0   31.50    4.60
  16 -11   0   40.90    5.80
  16 -11   0   19.50    7.20
  16 -11   0   32.90    9.10
  16  11   0   20.30    4.30
  16  11   0   31.80    9.70
 -16  11   0   29.60    3.30
  16  11   0   30.40    7.10
  16  11   0   26.00    6.50
  17 -11   0  162.28   17.50
 -17 -11   0  166.68   11.40
  17 -11   0  200.48   17.00
  17 -11   0  168.28   15.40
  17 -11   0  173.98   15.20
 -17 -11   0  175.98   14.10
  17 -11   0  179.28   13.20
  17  11   0  200.38   15.00
  17  11   0  201.28   19.50
  17  11   0  188.38   15.40
  17  11   0  178.58   11.80
 -18 -11   0  164.18   13.40
  18 -11   0  160.18   15.10
  18 -11   0  166.08   15.00
  18 -11   0  155.88   12.50
  18 -11   0  161.48   18.20
  18 -11   0  154.38   15.90
  18  11   0  177.58   20.50
  18  11   0  180.08   15.30
  19 -11   0    5.70    8.00
  19 -11   0   12.30    4.40
  19 -11   0   -0.80    5.60
  19 -11   0    8.00    6.40
  19 -11   0    3.10    5.90
 -19 -11   0    5.50    4.70
  19  11   0    1.20    2.10
  19  11   0   11.50    6.00
  19  11   0    2.90    4.40
  19  11   0   -0.30    7.90
  20 -11   0   -6.50    6.70
  20 -11   0   -3.70    5.20
  20 -11   0    0.20    5.10
 -20 -11   0    0.90    4.00
  20  11   0    0.90    4.50
  20  11   0   10.30    9.10
  20  11   0   -2.20    5.20
  21 -11   0   48.00    9.50
  21 -11   0   37.40    8.30
  21 -11   0   40.20   11.40
  21  11   0   36.90    9.10
  21  11   0   23.60   11.60
  21  11   0   29.30    7.10
  22 -11   0  184.18   15.80
  22 -11   0  165.18   19.40
  22 -11   0  173.68   17.60
  22  11   0  193.68   22.40
  22  11   0  143.39   13.80
  22  11   0  163.58   16.10
   0 -12   0   80.69    7.40
   0 -12   0   76.09    7.00
   0 -12   0   73.69    7.50
   0 -12   0   49.30    6.50
   0 -12   0   76.39    5.80
   0  12   0   77.79    7.60
   0  12   0   68.59    6.30
   0  12   0   82.49    8.00
   0  12   0   71.19    6.90
   0  12   0   82.89    7.00
   0  12   0   60.79    5.70
   0  12   0   65.59    6.90
   1 -12   0   58.69    6.90
  -1 -12   0   81.09    5.80
  -1 -12   0   76.69    6.00
  -1 -12   0   71.99    7.30
  -1 -12   0   86.69    7.50
   1 -12   0   83.29    7.60
  -1 -12   0   66.89    7.20
  -1 -12   0   72.69    7.00
   1 -12   0   82.89    6.30
   1 -12   0   94.39   10.30
   1 -12   0   74.69    7.30
   1  12   0   70.59    7.60
   1  12   0   63.19    7.20
  -1  12   0   69.79    8.10
  -1  12   0   66.69    7.00
  -1  12   0   76.19    7.90
   1  12   0   75.29    5.80
   1  12   0   84.09    7.20
   1  12   0   77.69    6.50
  -1  12   0   77.09    7.70
  -1  12   0   72.99    6.30
  -1  12   0   78.59    7.10
  -1  12   0   77.39    6.50
   1  12   0   75.49    7.30
   2 -12   0   88.39    7.80
   2 -12   0   86.99    7.80
   2 -12   0   71.89    7.40
  -2 -12   0   84.59    7.60
  -2 -12   0   70.99    5.80
  -2 -12   0   74.09    7.50
  -2 -12   0   82.99    7.60
   2 -12   0   89.29    6.90
  -2 -12   0   78.79    5.60
  -2 -12   0   78.29    7.80
   2  12   0   83.29    7.30
   2  12   0   80.59    7.40
   2  12   0   80.19    5.90
  -2  12   0   70.49    6.50
  -2  12   0   86.69    7.10
   2  12   0   80.89    7.00
  -2  12   0  111.99    8.90
   2  12   0   78.49    7.80
   2  12   0   81.29    8.10
  -2  12   0   82.09    7.50
  -2  12   0   91.99    8.20
  -3 -12   0  209.78   13.10
   3 -12   0  185.48   12.70
  -3 -12   0  188.58   11.30
  -3 -12   0  193.28   13.20
  -3 -12   0  201.48   12.90
   3 -12   0  189.78   12.10
   3 -12   0  229.28   13.50
  -3 -12   0  192.28   13.10
  -3 -12   0  198.58   10.80
   3 -12   0  208.68   13.20
   3  12   0  197.68   12.70
   3  12   0  190.48   11.00
  -3  12   0  208.48   12.70
  -3  12   0  185.08   13.30
  -3  12   0  194.88   12.20
   3  12   0  184.68   12.70
   3  12   0  197.98   12.40
   3  12   0  178.28   13.20
   3  12   0  195.78   13.40
  -3  12   0  182.68   12.20
  -3  12   0  199.58   13.00
   4 -12   0  147.99   10.80
  -4 -12   0  139.59    7.80
  -4 -12   0  149.99   10.20
  -4 -12   0  130.99   10.00
   4 -12   0  141.29   10.50
   4 -12   0  146.09   10.00
  -4 -12   0  134.29    8.70
   4 -12   0  141.99   10.20
  -4 -12   0  147.59   10.90
  -4 -12   0  142.29   10.70
   4  12   0  145.39    9.40
  -4  12   0  131.39   10.90
   4  12   0  133.49   10.60
   4  12   0  132.49   10.70
  -4  12   0  133.19    9.70
   4  12   0  148.69   10.30
   4  12   0  136.79    8.10
   4  12   0  140.69   10.20
  -4  12   0  149.39    9.60
  -4  12   0  145.69   10.50
  -4  12   0  132.39    9.30
  -4  12   0  133.49    9.90
   4  12   0  138.39    9.70
   5 -12   0   30.00    5.00
   5 -12   0   22.80    4.40
  -5 -12   0   32.90    5.40
   5 -12   0   26.80    5.40
   5 -12   0   25.40    3.80
  -5 -12   0   29.50    3.80
  -5 -12   0   24.40    2.30
  -5 -12   0   29.40    5.50
  -5 -12   0   34.20    5.10
  -5 -12   0   30.40    4.70
   5 -12   0   22.50    4.60
  -5  12   0   38.50    5.80
  -5  12   0   35.30    5.00
   5  12   0   23.60    4.60
  -5  12   0   30.70    4.90
  -5  12   0   27.90    3.90
   5  12   0   22.40    4.20
  -5  12   0   36.80    4.70
   5  12   0   21.60    4.80
   5  12   0   22.10    4.00
   5  12   0   18.20    4.90
   5  12   0   24.80    4.20
   6 -12   0  658.53   36.30
   6 -12   0  685.03   36.30
  -6 -12   0  663.33   36.40
  -6 -12   0  675.53   35.30
  -6 -12   0  658.63   35.80
  -6 -12   0  632.54   34.10
   6 -12   0  610.34   37.10
   6 -12   0  689.83   35.30
  -6 -12   0  689.03   35.30
   6 -12   0  664.63   35.60
   6 -12   0  686.53   34.50
  -6  12   0  693.23   34.50
   6  12   0  668.03   34.60
   6  12   0  664.53   34.90
  -6  12   0  631.34   34.20
  -6  12   0  677.43   34.80
  -6  12   0  693.63   35.60
   6  12   0  628.24   35.40
  -6  12   0  683.53   35.80
   6  12   0  613.54   36.50
  -7 -12   0  904.31   45.60
   7 -12   0  911.21   46.70
  -7 -12   0  817.32   47.30
   7 -12   0  883.21   45.80
   7 -12   0  871.41   46.70
  -7 -12   0  890.61   47.00
  -7 -12   0  924.81   45.60
   7 -12   0  892.01   44.80
   7 -12   0  882.71   46.80
  -7 -12   0  880.21   45.70
  -7  12   0  878.51   46.00
   7  12   0  965.40   45.20
   7  12   0  871.11   47.00
  -7  12   0  861.81   44.50
   7  12   0  856.31   45.10
  -7  12   0  836.42   44.90
   7  12   0  861.21   45.90
  -7  12   0  838.02   44.40
   7  12   0  784.42   45.80
  -7  12   0  922.51   46.30
   8 -12   0  223.88   15.90
   8 -12   0  229.68   15.20
  -8 -12   0  242.88   14.80
  -8 -12   0  237.58   15.80
   8 -12   0  227.28   16.10
  -8 -12   0  226.58   14.60
   8 -12   0  231.58   16.00
  -8 -12   0  249.78   14.30
   8 -12   0  240.58   14.10
   8  12   0  234.38   15.20
  -8  12   0  235.98   15.40
  -8  12   0  227.58   14.20
   8  12   0  233.38   14.40
   8  12   0  258.17   14.70
  -8  12   0  226.78   13.70
   8  12   0  221.08   15.40
   8  12   0  209.88   16.30
  -8  12   0  226.78   15.50
  -8  12   0  240.38   13.80
   9 -12   0  850.71   46.90
   9 -12   0  804.12   46.10
   9 -12   0  830.72   46.40
  -9 -12   0  858.41   44.90
  -9 -12   0  883.11   45.00
   9 -12   0  823.42   44.20
  -9 -12   0  885.71   46.00
   9 -12   0  738.53   45.10
  -9 -12   0  905.71   45.00
  -9  12   0  893.81   44.10
  -9  12   0  852.01   44.30
   9  12   0  957.50   45.10
   9  12   0  822.22   47.00
  -9  12   0  887.51   45.90
  -9  12   0  905.31   44.00
   9  12   0  818.32   45.70
   9  12   0  916.21   44.90
  -9  12   0  878.71   46.00
   9  12   0  885.41   45.70
  10 -12   0   28.50    6.30
  10 -12   0   28.20    6.30
  10 -12   0   34.30    6.50
 -10 -12   0   36.10    5.40
 -10 -12   0   45.60    7.00
  10 -12   0   34.80    5.00
  10 -12   0   31.60    7.00
 -10 -12   0   30.40    5.10
  10 -12   0   36.00    7.50
 -10 -12   0   32.60    5.30
  10  12   0   26.20    4.70
 -10  12   0   40.20    4.60
 -10  12   0   41.70    5.20
  10  12   0   29.10    5.70
 -10  12   0   49.50    7.40
 -10  12   0   30.60    5.50
  10  12   0   24.70    7.00
 -10  12   0   25.60    4.50
  10  12   0   35.50    6.40
 -11 -12   0  620.94   34.90
  11 -12   0  617.84   36.70
  11 -12   0  648.14   37.90
  11 -12   0  667.43   37.80
 -11 -12   0  667.63   35.60
  11 -12   0  596.44   35.80
 -11 -12   0  632.04   34.80
  11 -12   0  662.13   34.60
 -11 -12   0  637.74   36.10
  11 -12   0  709.33   37.40
  11  12   0  681.33   35.00
  11  12   0  657.73   38.10
  11  12   0  710.03   35.60
 -11  12   0  677.03   33.80
  11  12   0  664.33   36.30
 -11  12   0  642.14   36.50
 -11  12   0  645.34   34.20
 -11  12   0  649.14   36.00
  12 -12   0  300.47   19.10
  12 -12   0  247.38   19.00
  12 -12   0  220.98   17.40
  12 -12   0  288.17   16.30
  12 -12   0  317.87   20.30
 -12 -12   0  230.08   16.70
 -12 -12   0  264.97   16.20
  12 -12   0  262.37   18.70
 -12 -12   0  254.57   17.70
 -12 -12   0  259.47   16.10
  12  12   0  286.17   17.30
  12  12   0  259.77   17.70
 -12  12   0  253.57   15.30
 -12  12   0  264.07   14.80
 -12  12   0  256.77   17.30
  12  12   0  258.57   16.10
  12  12   0  281.37   20.20
 -12  12   0  236.88   17.60
  13 -12   0  636.64   36.50
  13 -12   0  588.64   32.40
  13 -12   0  590.14   35.20
 -13 -12   0  596.94   32.50
  13 -12   0  625.94   35.40
  13 -12   0  559.54   34.10
 -13 -12   0  571.84   34.00
 -13 -12   0  619.44   34.20
  13  12   0  604.14   32.50
 -13  12   0  566.04   31.50
 -13  12   0  586.34   30.70
  13  12   0  678.33   34.10
  13  12   0  649.93   34.60
  13  12   0  627.64   37.20
  14 -12   0    5.60    5.10
  14 -12   0    2.70    3.00
  14 -12   0   -0.70    5.60
 -14 -12   0    2.30    2.80
 -14 -12   0   -0.90    3.80
 -14 -12   0    4.20    3.60
 -14 -12   0   -0.80    2.50
  14 -12   0   -4.90    4.50
  14 -12   0    3.30    5.50
 -14  12   0    0.60    2.20
  14  12   0    1.70    4.40
  14  12   0   -3.30    2.80
 -14  12   0    0.40    1.10
  14  12   0   -3.90    5.90
  14  12   0    1.60    4.10
  15 -12   0   45.10    5.90
 -15 -12   0   42.20    5.40
  15 -12   0   34.50    7.80
 -15 -12   0   42.60    6.20
  15 -12   0   42.10    9.50
  15 -12   0   22.10    7.10
  15 -12   0   36.80    7.30
 -15 -12   0   36.10    7.00
  15  12   0   47.30    7.40
  15  12   0   35.50    9.60
 -15  12   0   39.70    4.50
  15  12   0   36.30    7.30
  15  12   0   33.90    5.10
  16 -12   0   18.60    6.50
  16 -12   0   30.50    5.40
 -16 -12   0   11.50    3.70
 -16 -12   0   15.50    5.90
  16 -12   0   22.60    6.70
  16 -12   0   17.60   12.80
  16 -12   0   26.80    6.90
  16  12   0   21.90    6.50
 -16  12   0   22.80    3.20
  16  12   0   11.30    3.70
  16  12   0   24.50    6.20
  17 -12   0    6.20    7.30
  17 -12   0    7.60    3.70
  17 -12   0    6.10    5.80
  17 -12   0    1.80    5.40
 -17 -12   0   -0.20    2.50
 -17 -12   0    7.10    4.60
  17  12   0    4.80    7.70
  17  12   0   -1.90    2.70
  17  12   0    3.70    6.00
  17  12   0    0.80    4.50
  18 -12   0   28.90    5.40
  18 -12   0   24.80    9.10
  18 -12   0   27.60    7.70
  18 -12   0   22.70    8.00
 -18 -12   0   21.60    6.20
  18 -12   0   25.90    7.40
  18  12   0   18.20    6.00
  18  12   0   18.00    3.90
  18  12   0   24.10    8.30
  18  12   0   18.60    9.20
 -19 -12   0   87.69   10.90
  19 -12   0   93.89   13.00
  19 -12   0   91.29   13.50
  19 -12   0   91.49   15.00
  19 -12   0   99.69   10.60
  19 -12   0  113.19   13.20
  19  12   0  127.49   13.10
  19  12   0  126.49   12.10
  19  12   0  147.89   17.90
  20 -12   0   -1.40    5.80
  20 -12   0    4.20    5.70
  20 -12   0   -6.20    7.30
 -20 -12   0   -7.50    4.20
  20  12   0   -1.60    4.20
  20  12   0   -3.20    5.60
  20  12   0   12.00    7.50
  21 -12   0   12.20   10.40
  21 -12   0   11.20    6.40
  21 -12   0   13.10    6.50
 -21 -12   0   -1.00    3.10
  21  12   0    8.20    6.90
  21  12   0    2.90    5.00
  21  12   0   20.30   10.50
  22 -12   0   16.00    8.20
  22 -12   0   20.10   11.00
  22 -12   0   28.80    7.50
  22  12   0   11.50    5.40
  22  12   0   26.70    7.70
  22  12   0   30.40   10.50
   0 -13   0    0.10    3.10
   0 -13   0    1.40    3.00
   0 -13   0    6.40    3.60
   0 -13   0    5.10    3.60
   0 -13   0    3.40    2.20
   0  13   0    0.60    3.40
   0  13   0   -0.40    3.20
   0  13   0   -0.40    2.20
   0  13   0    4.70    3.20
   0  13   0    1.70    3.10
   0  13   0    1.50    2.50
   0  13   0   -1.50    3.60
   1 -13   0 1336.87   67.29
  -1 -13   0 1202.78   66.99
  -1 -13   0 1335.87   67.39
   1 -13   0 1405.96   67.49
   1 -13   0 1264.97   65.79
   1 -13   0 1108.99   66.59
   1 -13   0 1367.96   67.69
  -1 -13   0 1364.26   65.89
  -1 -13   0 1351.36   67.29
  -1 -13   0 1437.96   67.49
  -1 -13   0 1378.26   65.49
  -1  13   0 1295.67   67.39
  -1  13   0 1291.17   66.09
   1  13   0 1353.96   67.79
   1  13   0 1317.67   67.19
  -1  13   0 1290.67   66.29
   1  13   0 1323.47   66.99
  -1  13   0 1357.76   66.89
   1  13   0 1278.17   65.59
  -1  13   0 1305.07   66.79
  -1  13   0 1428.56   68.09
   1  13   0 1391.26   66.59
   1  13   0 1270.97   67.29
  -1  13   0 1288.37   67.09
   2 -13   0   94.69    8.70
  -2 -13   0   88.19    8.10
  -2 -13   0   88.69    6.20
   2 -13   0   90.09    7.10
  -2 -13   0   97.59    8.30
   2 -13   0   87.89    8.00
  -2 -13   0   82.09    8.50
  -2 -13   0   87.89    6.50
  -2 -13   0  100.39    8.30
   2 -13   0   83.59    8.40
   2 -13   0   70.79    7.70
  -2  13   0  104.89    7.50
  -2  13   0   80.19    7.10
  -2  13   0   89.89    8.60
  -2  13   0   93.39    8.90
  -2  13   0   88.09    8.10
   2  13   0   85.39    7.90
  -2  13   0   88.49    7.70
  -2  13   0   95.39    7.80
   2  13   0   72.69    8.30
   2  13   0   86.19    8.60
   2  13   0   89.79    8.00
   2  13   0   91.59    7.40
   2  13   0   80.19    6.30
  -3 -13   0   66.99    7.60
   3 -13   0   68.69    7.70
   3 -13   0   82.99    6.90
  -3 -13   0   64.79    7.00
  -3 -13   0   65.89    5.00
  -3 -13   0   73.89    8.10
   3 -13   0   72.69    7.40
   3 -13   0   50.99    6.80
   3 -13   0   81.49    7.80
  -3 -13   0   69.99    7.20
  -3 -13   0   67.79    5.60
  -3  13   0   64.39    8.10
  -3  13   0   67.19    6.70
   3  13   0   80.29    5.40
   3  13   0   66.59    8.00
   3  13   0   70.29    8.30
   3  13   0   67.49    7.10
   3  13   0   61.59    7.00
   3  13   0   69.49    6.60
  -3  13   0   71.09    6.90
  -3  13   0   68.29    7.30
  -3  13   0   75.49    6.50
  -3  13   0   62.89    6.40
  -4 -13   0  354.36   17.90
   4 -13   0  409.16   21.30
   4 -13   0  338.87   20.70
   4 -13   0  369.06   20.00
  -4 -13   0  336.77   20.20
   4 -13   0  315.67   20.00
  -4 -13   0  351.76   18.80
  -4 -13   0  349.96   20.90
  -4 -13   0  360.46   20.90
  -4 -13   0  344.67   20.30
   4 -13   0  320.87   20.90
  -4  13   0  349.47   19.50
  -4  13   0  362.36   19.60
  -4  13   0  336.47   19.90
  -4  13   0  343.37   21.30
   4  13   0  352.36   20.50
   4  13   0  327.17   20.20
  -4  13   0  334.67   20.50
   4  13   0  335.27   19.80
   4  13   0  369.36   18.20
   4  13   0  319.47   20.90
   4  13   0  319.17   20.60
  -4  13   0  358.36   20.00
  -5 -13   0 1706.83   85.79
  -5 -13   0 1744.33   88.39
   5 -13   0 1728.03   89.49
  -5 -13   0 1820.02   88.69
  -5 -13   0 1685.53   90.69
   5 -13   0 2086.19   92.09
  -5 -13   0 1797.02   87.19
   5 -13   0 1708.63   88.39
  -5 -13   0 1825.22   89.49
   5 -13   0 1874.71   89.59
   5  13   0 1745.13   88.69
   5  13   0 1734.33   88.69
  -5  13   0 1722.43   88.79
   5  13   0 1878.71   87.89
  -5  13   0 1888.11   87.89
  -5  13   0 1771.02   87.59
   5  13   0 1505.85   88.89
  -5  13   0 1755.32   88.49
  -5  13   0 1824.12   88.19
   5  13   0 1665.03   89.39
   5  13   0 1712.43   88.09
  -6 -13   0  727.33   36.70
   6 -13   0  677.33   38.80
  -6 -13   0  723.43   39.00
   6 -13   0  713.83   37.00
   6 -13   0  711.53   38.80
   6 -13   0  710.43   37.80
  -6 -13   0  767.12   38.20
  -6 -13   0  692.63   37.70
   6 -13   0  743.83   38.00
   6 -13   0  781.72   39.10
  -6 -13   0  759.62   39.30
  -6  13   0  673.83   38.20
  -6  13   0  714.83   37.00
   6  13   0  610.84   38.10
  -6  13   0  717.03   37.40
   6  13   0  734.33   37.20
   6  13   0  697.73   39.10
  -6  13   0  693.93   38.00
   6  13   0  703.33   37.50
   6  13   0  735.93   38.40
  -6  13   0  693.73   36.80
   7 -13   0    9.10    4.20
  -7 -13   0    3.90    4.30
   7 -13   0    5.70    4.10
  -7 -13   0    2.80    3.80
  -7 -13   0    6.50    3.10
   7 -13   0    5.00    4.10
   7 -13   0    9.60    3.00
  -7 -13   0    5.20    2.80
   7 -13   0    1.30    3.90
  -7 -13   0    6.30    3.30
  -7  13   0    2.60    3.00
  -7  13   0    6.10    3.70
  -7  13   0    4.40    2.80
   7  13   0    9.60    3.20
  -7  13   0    5.50    2.70
   7  13   0    5.20    3.20
  -7  13   0    5.80    3.60
   7  13   0    1.80    3.30
   7  13   0    8.60    5.00
   7  13   0   -1.10    2.90
   8 -13   0  110.29    8.40
  -8 -13   0   97.69   10.00
   8 -13   0  125.49   10.90
  -8 -13   0  111.99    9.40
   8 -13   0  110.09    9.80
  -8 -13   0  106.19    9.10
   8 -13   0  122.29   10.90
  -8 -13   0  111.99    8.60
   8 -13   0  122.79   10.90
   8  13   0  112.59    8.90
  -8  13   0  105.39    9.80
  -8  13   0  108.79    8.70
   8  13   0   89.19    9.90
   8  13   0  101.69   10.80
  -8  13   0  130.89    8.60
   8  13   0  113.49    9.80
   8  13   0  115.99    8.90
  -8  13   0  112.99   10.00
  -9 -13   0   15.70    4.30
   9 -13   0    4.10    4.70
   9 -13   0   16.20    5.20
   9 -13   0   23.70    5.90
  -9 -13   0   13.20    3.70
   9 -13   0   21.10    5.80
  -9 -13   0   18.30    5.30
  -9 -13   0   15.00    4.00
   9 -13   0   12.80    3.60
  -9  13   0   21.20    5.30
  -9  13   0   17.20    3.70
   9  13   0   13.70    6.20
   9  13   0    8.70    4.40
   9  13   0   18.60    5.20
  -9  13   0   17.10    3.60
   9  13   0   14.50    4.00
   9  13   0   13.60    4.00
  -9  13   0   12.90    4.30
  -9  13   0   22.50    4.30
 -10 -13   0   22.60    4.80
 -10 -13   0   28.40    6.20
  10 -13   0   27.10    6.00
  10 -13   0   17.50    5.60
 -10 -13   0   23.70    4.90
  10 -13   0   20.70    4.30
  10 -13   0   18.10    6.50
  10 -13   0   13.10    5.50
  10 -13   0   13.30    5.30
 -10 -13   0   25.40    4.80
  10  13   0   18.80    6.70
  10  13   0   23.50    4.70
  10  13   0   29.80    5.90
  10  13   0   20.70    4.40
 -10  13   0   10.50    4.20
 -10  13   0   19.20    3.60
 -10  13   0   24.90    4.90
  10  13   0   15.60    5.40
 -10  13   0   22.40    4.20
 -10  13   0   23.60    5.30
 -11 -13   0   84.09    8.20
 -11 -13   0   84.49    7.70
  11 -13   0   65.29    9.00
  11 -13   0   80.29    7.50
 -11 -13   0   81.69    8.10
  11 -13   0   60.89    8.80
 -11 -13   0   89.89   10.00
  11 -13   0   89.49   11.30
  11 -13   0   87.89   10.20
  11 -13   0   94.59   11.50
  11  13   0   85.49    8.50
 -11  13   0  100.19    7.70
  11  13   0   79.89    7.90
  11  13   0   92.39    9.20
 -11  13   0   82.29    9.00
 -11  13   0   95.49    7.00
 -11  13   0   85.29    9.50
  11  13   0   95.79   11.90
  11  13   0   83.49    9.50
  12 -13   0    4.80    3.40
 -12 -13   0    6.50    3.70
  12 -13   0    3.30    5.00
  12 -13   0   -1.00    4.40
  12 -13   0    8.90    5.40
 -12 -13   0    0.00    4.40
  12 -13   0   -1.00    5.40
 -12 -13   0    5.30    3.60
  12  13   0   -0.80    3.20
  12  13   0    7.00    4.20
  12  13   0    3.40    4.20
  12  13   0   -3.60    5.50
 -12  13   0    3.10    2.00
  13 -13   0  129.79   13.70
  13 -13   0  120.29   12.30
 -13 -13   0  135.09   12.10
  13 -13   0  125.39   12.20
 -13 -13   0  130.99    9.90
  13 -13   0  129.19   13.00
 -13 -13   0  142.29   10.30
 -13 -13   0  129.29   12.40
  13 -13   0  111.09    9.70
 -13  13   0  123.99    8.40
  13  13   0  134.59   12.10
  13  13   0  131.79   14.40
  13  13   0  119.69   10.10
 -13  13   0  123.89    9.00
  13  13   0  141.59   11.40
  14 -13   0   35.10    7.30
  14 -13   0   47.90    9.30
 -14 -13   0   51.99    7.90
  14 -13   0   41.60    5.90
 -14 -13   0   50.99    6.40
 -14 -13   0   47.60    5.90
  14 -13   0   37.90    8.30
 -14 -13   0   55.89    8.10
  14 -13   0   32.70    7.30
  14  13   0   35.80    9.20
  14  13   0   52.79    8.50
 -14  13   0   42.20    5.10
  14  13   0   44.40    5.90
 -14  13   0   45.20    4.00
  14  13   0   59.69    8.10
  15 -13   0    4.50    6.40
  15 -13   0    6.20    4.80
  15 -13   0    2.60    3.20
  15 -13   0    2.60    5.40
  15 -13   0   -2.50    5.40
 -15 -13   0    2.30    2.90
 -15 -13   0    5.10    5.00
  15  13   0    2.60    7.40
  15  13   0    0.10    3.00
  15  13   0    3.10    4.70
 -15  13   0    1.30    2.10
  15  13   0   -2.90    4.00
  16 -13   0    3.80    6.20
  16 -13   0    3.90    3.60
  16 -13   0    7.30    5.80
  16 -13   0    0.20    5.20
 -16 -13   0    5.90    4.60
  16 -13   0    5.50    7.20
 -16  13   0    6.20    2.30
  16  13   0    2.30    3.40
  16  13   0    2.60    7.00
  16  13   0    0.10    4.80
  16  13   0    9.00    5.20
  17 -13   0    9.50    7.70
  17 -13   0   11.90    6.70
  17 -13   0    5.50    6.50
 -17 -13   0   -0.40    1.90
 -17 -13   0    3.80    5.20
  17 -13   0    6.90    6.20
  17 -13   0    8.80    4.00
 -17  13   0    5.20    1.70
  17  13   0   13.90    6.20
  17  13   0   -1.50    7.70
  17  13   0    5.20    3.40
  17  13   0   -4.80    4.80
  18 -13   0   25.40    8.20
 -18 -13   0   19.10    6.30
  18 -13   0    7.60    8.30
  18 -13   0   24.10    4.90
  18 -13   0   20.20    6.90
  18 -13   0   30.70    8.20
  18  13   0    7.90    3.60
  18  13   0   18.80    6.00
  18  13   0   14.20    9.50
  19 -13   0  126.29   16.20
  19 -13   0  100.49   13.60
  19 -13   0  111.39   13.30
 -19 -13   0  108.29   11.80
  19  13   0  110.19   16.20
  19  13   0  124.99   13.10
  19  13   0  109.79   11.90
  20 -13   0    5.60    5.80
  20 -13   0   -7.50    6.80
  20 -13   0   -4.70    5.20
 -20 -13   0    3.40    5.00
  20  13   0   -0.20    5.50
  20  13   0    4.90    4.60
  20  13   0    2.80    7.80
  21 -13   0    8.60    6.60
  21 -13   0    6.10   11.60
  21 -13   0   19.00    7.60
  21  13   0   19.30    5.80
  21  13   0   15.40    6.50
   0 -14   0   50.99    5.20
   0 -14   0   28.80    5.60
   0 -14   0   50.89    6.60
   0 -14   0   48.60    5.50
   0 -14   0   48.00    6.40
   0 -14   0   51.29    7.20
   0  14   0   52.79    6.70
   0  14   0   46.80    6.60
   0  14   0   55.39    6.20
   0  14   0   54.49    6.80
   0  14   0   39.90    6.00
   0  14   0   56.59    7.70
   0  14   0   45.30    5.30
   1 -14   0  298.47   20.80
  -1 -14   0  317.87   21.20
   1 -14   0  356.46   21.70
   1 -14   0  364.86   21.40
   1 -14   0  358.26   21.50
  -1 -14   0  353.66   19.40
   1 -14   0  358.66   19.90
  -1 -14   0  372.76   21.60
  -1 -14   0  382.86   19.90
  -1 -14   0  366.16   21.40
  -1 -14   0  337.97   21.10
  -1  14   0  361.16   20.50
   1  14   0  353.16   21.50
   1  14   0  366.16   19.80
  -1  14   0  369.66   21.10
  -1  14   0  407.26   22.50
  -1  14   0  354.16   20.90
  -1  14   0  356.06   21.30
   1  14   0  407.36   22.40
  -1  14   0  356.76   21.70
  -1  14   0  363.86   20.30
   1  14   0  381.46   20.80
   1  14   0  340.07   21.40
   1  14   0  379.06   21.20
  -2 -14   0    6.10    3.30
  -2 -14   0    9.30    2.60
  -2 -14   0   12.20    2.70
  -2 -14   0    3.90    4.00
   2 -14   0    8.20    3.70
   2 -14   0    2.70    2.90
   2 -14   0    8.30    3.60
   2 -14   0    7.80    3.90
  -2 -14   0   11.30    4.00
  -2 -14   0   14.20    3.90
   2 -14   0    8.10    3.80
  -2  14   0   11.70    4.30
   2  14   0   11.20    3.90
  -2  14   0    9.60    3.50
  -2  14   0    7.50    3.40
   2  14   0   13.80    4.20
  -2  14   0    9.10    3.60
  -2  14   0    9.20    3.20
   2  14   0   10.20    2.60
   2  14   0    9.60    4.00
  -2  14   0   19.00    5.30
   2  14   0   12.20    3.50
  -2  14   0    9.30    3.30
   2  14   0    5.00    3.70
  -3 -14   0  701.73   35.10
  -3 -14   0  619.04   35.10
  -3 -14   0  635.74   32.50
   3 -14   0  589.14   34.60
   3 -14   0  670.83   35.40
   3 -14   0  649.83   34.00
  -3 -14   0  671.63   35.20
  -3 -14   0  644.34   33.20
   3 -14   0  625.84   35.50
   3 -14   0  659.83   35.30
  -3  14   0  587.84   34.00
  -3  14   0  615.84   34.90
   3  14   0  688.03   33.00
   3  14   0  659.03   34.90
  -3  14   0  651.73   34.20
   3  14   0  670.03   34.40
  -3  14   0  654.03   34.10
   3  14   0  599.04   37.20
  -3  14   0  640.14   34.40
   3  14   0  645.84   34.90
  -4 -14   0 1429.96   69.79
  -4 -14   0 1423.26   70.69
  -4 -14   0 1492.75   72.99
  -4 -14   0 1439.16   72.99
   4 -14   0 1405.26   73.19
   4 -14   0 1304.07   71.99
  -4 -14   0 1428.76   72.39
  -4 -14   0 1476.15   72.39
   4 -14   0 1588.54   78.19
   4 -14   0 1427.76   72.79
  -4  14   0 1470.65   71.59
   4  14   0 1413.56   71.79
   4  14   0 1423.16   70.09
   4  14   0 1435.36   72.39
  -4  14   0 1350.76   71.79
  -4  14   0 1414.36   71.39
   4  14   0 1347.67   72.69
   4  14   0 1404.86   72.39
   4  14   0 1451.05   73.19
  -4  14   0 1458.25   73.49
  -4  14   0 1420.86   71.89
  -4  14   0 1380.46   72.49
   5 -14   0  248.98   16.40
  -5 -14   0  223.28   12.40
   5 -14   0  255.37   16.30
  -5 -14   0  230.08   15.20
   5 -14   0  268.87   15.50
  -5 -14   0  237.78   16.00
  -5 -14   0  218.28   15.80
   5 -14   0  245.98   16.60
  -5 -14   0  231.98   13.70
   5 -14   0  251.97   15.60
  -5 -14   0  246.68   15.50
  -5  14   0  246.08   15.80
   5  14   0  205.38   15.70
   5  14   0  228.78   14.80
   5  14   0  213.28   16.00
  -5  14   0  235.28   14.40
   5  14   0  245.98   14.60
   5  14   0  245.48   15.70
  -5  14   0  251.57   17.10
   5  14   0  224.08   15.30
  -5  14   0  215.88   14.70
  -5  14   0  246.18   15.40
  -5  14   0  241.48   14.50
   6 -14   0   17.80    4.80
  -6 -14   0   17.00    3.80
  -6 -14   0   24.10    4.70
   6 -14   0   24.80    5.00
   6 -14   0    9.70    4.80
  -6 -14   0   20.80    5.60
   6 -14   0   18.40    5.20
  -6 -14   0   17.80    4.90
   6 -14   0   14.30    4.80
  -6 -14   0   18.90    4.40
   6  14   0   19.30    5.90
  -6  14   0   19.80    4.60
   6  14   0   17.00    4.70
   6  14   0   12.60    4.90
  -6  14   0   23.30    4.90
  -6  14   0   25.00    5.40
   6  14   0   10.20    3.50
   6  14   0   20.10    4.20
  -6  14   0   17.20    3.90
  -6  14   0   18.70    3.80
   7 -14   0  851.41   46.10
  -7 -14   0  865.71   44.70
  -7 -14   0  890.01   44.90
   7 -14   0  841.42   45.90
   7 -14   0  830.02   43.60
  -7 -14   0  840.92   45.60
   7 -14   0  891.51   45.00
  -7 -14   0  868.41   46.20
  -7 -14   0  843.82   43.50
   7 -14   0  884.01   45.90
  -7  14   0  810.62   43.50
  -7  14   0  861.81   45.20
  -7  14   0  860.21   44.30
   7  14   0  857.91   44.40
   7  14   0  826.52   46.10
  -7  14   0  838.22   43.70
  -7  14   0  851.41   45.30
   7  14   0  733.63   45.00
   7  14   0  903.31   44.10
   7  14   0  832.12   45.10
   8 -14   0    8.30    4.30
   8 -14   0    5.70    3.10
  -8 -14   0   11.20    4.00
  -8 -14   0    1.00    3.60
   8 -14   0    6.50    4.30
  -8 -14   0    2.70    4.60
   8 -14   0   12.30    4.90
  -8 -14   0   12.20    4.80
   8 -14   0    3.80    4.60
  -8 -14   0   11.80    3.40
  -8  14   0    5.50    3.30
  -8  14   0    5.60    3.90
   8  14   0    8.50    4.20
   8  14   0   -0.70    4.70
  -8  14   0   12.10    3.30
   8  14   0    3.80    3.30
  -8  14   0   11.00    3.40
   8  14   0    4.40    4.10
  -8  14   0    6.90    4.00
   8  14   0    1.60    3.30
   9 -14   0  373.06   23.70
  -9 -14   0  385.86   22.20
   9 -14   0  352.96   21.00
   9 -14   0  370.26   23.80
  -9 -14   0  369.76   21.40
  -9 -14   0  398.86   22.20
  -9 -14   0  376.36   23.30
   9 -14   0  363.96   22.80
  -9  14   0  359.96   21.40
  -9  14   0  382.56   21.00
   9  14   0  378.06   24.60
   9  14   0  325.77   22.70
   9  14   0  388.76   23.00
  -9  14   0  376.26   21.00
   9  14   0  408.56   22.00
   9  14   0  392.46   22.10
 -10 -14   0  812.02   43.70
  10 -14   0  824.62   43.10
  10 -14   0  794.02   44.60
  10 -14   0  813.12   46.00
  10 -14   0  868.51   45.90
  10 -14   0  841.72   46.00
  10 -14   0  839.42   46.30
 -10 -14   0  786.62   43.80
 -10 -14   0  874.11   45.50
 -10 -14   0  838.82   43.90
 -10  14   0  800.02   42.80
 -10  14   0  842.22   42.90
  10  14   0  826.82   43.80
  10  14   0  801.92   46.50
  10  14   0  924.61   44.20
  10  14   0  858.51   45.00
  10  14   0  802.92   45.00
 -10  14   0  834.02   43.30
 -11 -14   0  339.57   20.90
  11 -14   0  363.26   20.40
 -11 -14   0  350.86   22.50
  11 -14   0  333.97   22.20
 -11 -14   0  357.76   20.90
  11 -14   0  345.27   23.60
  11 -14   0  342.87   23.60
  11 -14   0  375.56   23.40
  11 -14   0  379.56   23.40
 -11 -14   0  349.77   22.30
  11  14   0  336.57   21.90
  11  14   0  345.17   20.90
  11  14   0  334.77   22.30
 -11  14   0  380.26   20.10
 -11  14   0  320.77   22.40
 -11  14   0  343.57   20.10
  11  14   0  370.86   21.30
  11  14   0  360.06   24.50
  12 -14   0   59.99    9.30
 -12 -14   0   49.40    7.20
  12 -14   0   55.49    8.70
 -12 -14   0   65.19    7.40
  12 -14   0   57.79    9.90
 -12 -14   0   62.59    6.70
 -12 -14   0   51.69    8.30
  12 -14   0   56.09    9.60
  12 -14   0   59.49    9.90
  12  14   0   61.99    7.90
  12  14   0   46.80    6.90
 -12  14   0   58.19    5.80
  12  14   0   53.29    8.50
  12  14   0   63.99   10.70
 -12  14   0   54.19    6.00
 -13 -14   0  491.25   28.20
  13 -14   0  548.25   32.40
  13 -14   0  501.55   31.00
 -13 -14   0  531.65   28.40
  13 -14   0  522.05   28.00
 -13 -14   0  515.55   30.10
  13 -14   0  458.25   29.80
  13 -14   0  512.35   31.00
  13  14   0  523.55   29.30
  13  14   0  516.45   30.20
  13  14   0  519.05   32.50
 -13  14   0  488.05   27.30
 -13  14   0  507.75   26.90
  13  14   0  475.65   28.30
  14 -14   0   26.90    5.00
  14 -14   0   23.00    6.90
  14 -14   0   17.40    6.70
 -14 -14   0   40.00    7.60
 -14 -14   0   41.80    6.60
  14 -14   0   36.40    8.70
 -14 -14   0   24.10    5.20
  14 -14   0   26.90    6.70
 -14  14   0   33.30    3.90
  14  14   0   27.50    8.70
  14  14   0   30.40    6.50
  14  14   0   34.10    6.90
  14  14   0   30.00    5.40
  15 -14   0   25.00    8.60
  15 -14   0   21.10    6.70
  15 -14   0   34.10    8.70
  15 -14   0   26.10    5.10
 -15 -14   0   35.20    8.00
  15 -14   0   37.40    8.10
 -15 -14   0   29.70    5.10
  15  14   0   23.40    4.90
  15  14   0   22.30   10.30
 -15  14   0   38.10    4.70
  15  14   0   27.50    6.50
  15  14   0   33.40    7.20
  16 -14   0   21.30    7.50
  16 -14   0   22.20    7.20
  16 -14   0   17.80    6.70
 -16 -14   0   17.90    6.50
  16 -14   0   20.10    8.30
  16 -14   0   22.80    4.80
  16  14   0   24.90    6.50
  16  14   0   22.60    9.70
  16  14   0   30.30    7.00
 -16  14   0   22.50    3.40
  16  14   0   20.40    4.90
  17 -14   0  100.09    9.20
  17 -14   0  123.39   15.70
  17 -14   0   92.29   12.80
  17 -14   0  125.29   14.10
  17 -14   0   95.79   12.30
 -17 -14   0  101.89   12.10
  17  14   0  128.99   16.50
  17  14   0   94.39    9.10
  17  14   0  113.29   12.20
  17  14   0  118.59   12.20
  18 -14   0    6.60    7.40
  18 -14   0    9.10    7.60
  18 -14   0   -0.40    6.30
 -18 -14   0   15.30    6.00
  18 -14   0    4.20    4.00
  18 -14   0    6.40    8.20
  18  14   0    7.20    3.80
  18  14   0   13.70    9.00
  18  14   0   12.10    5.90
  18  14   0    2.90    6.70
  19 -14   0   18.50    7.80
  19 -14   0   14.20    7.20
 -19 -14   0   11.90    5.90
  19 -14   0   22.80    9.00
  19  14   0   26.10    6.40
  19  14   0   20.60    6.90
  19  14   0   10.00    8.70
  20 -14   0   19.70    7.30
  20 -14   0   13.70    7.30
  20 -14   0   17.90    9.90
 -20 -14   0   31.50    7.30
  20  14   0   18.10    6.20
  20  14   0   19.80    9.80
  20  14   0   11.30    7.10
 -21 -14   0    0.70    3.60
  21 -14   0   -3.60    7.90
  21 -14   0   -8.90    7.90
  21 -14   0   -4.80    5.70
  21  14   0    8.00    6.60
  21  14   0   16.70    9.80
  21  14   0   -1.60    3.90
   0 -15   0    4.30    4.40
   0 -15   0    4.30    3.70
   0 -15   0    4.20    4.00
   0 -15   0    3.40    2.70
   0 -15   0    1.40    3.20
   0 -15   0    5.60    2.70
   0  15   0    8.30    3.20
   0  15   0   -0.90    2.80
   0  15   0    0.50    3.20
   0  15   0    5.10    3.00
   0  15   0    9.90    4.50
   0  15   0    9.20    4.20
  -1 -15   0    3.10    2.40
   1 -15   0    4.20    3.30
   1 -15   0    7.00    3.20
  -1 -15   0    0.90    3.70
  -1 -15   0    7.00    3.60
   1 -15   0    1.40    3.20
  -1 -15   0    2.80    3.30
  -1 -15   0    2.20    2.40
  -1 -15   0    2.80    3.40
   1 -15   0   -0.40    3.30
  -1  15   0    2.20    2.80
   1  15   0    4.50    3.10
   1  15   0    6.00    3.60
  -1  15   0    1.50    3.20
  -1  15   0    2.20    2.80
  -1  15   0    3.80    3.10
   1  15   0    0.50    4.10
   1  15   0    2.50    3.80
   1  15   0    1.60    3.70
   1  15   0    3.70    2.50
  -1  15   0    2.90    3.80
  -1  15   0    2.90    3.50
   1  15   0    0.60    3.60
  -1  15   0    3.10    4.40
  -2 -15   0  936.61   47.20
   2 -15   0  749.62   46.70
   2 -15   0  894.41   47.60
   2 -15   0  970.30   46.00
   2 -15   0  909.91   47.40
  -2 -15   0  918.21   47.40
  -2 -15   0  827.12   47.00
  -2 -15   0  881.41   44.80
  -2 -15   0  812.72   47.00
  -2 -15   0  902.21   45.30
   2 -15   0  885.31   47.20
  -2  15   0  940.41   47.90
   2  15   0  932.41   47.80
  -2  15   0  898.01   46.50
  -2  15   0  920.61   46.20
  -2  15   0  864.01   47.00
   2  15   0  892.11   47.10
   2  15   0  899.61   46.30
  -2  15   0  913.81   46.70
  -2  15   0  902.41   47.90
   2  15   0  860.91   46.80
  -2  15   0  841.72   45.90
   2  15   0  910.41   45.20
   2  15   0  919.61   47.90
  -3 -15   0  214.28   14.10
  -3 -15   0  190.68   13.20
  -3 -15   0  175.88   10.50
  -3 -15   0  182.98   13.10
   3 -15   0  185.88   12.90
  -3 -15   0  197.08   13.40
   3 -15   0  155.98   12.70
   3 -15   0  173.38   14.80
  -3 -15   0  191.08   11.30
   3 -15   0  170.28   13.30
   3 -15   0  176.48   12.90
  -3  15   0  187.98   14.00
  -3  15   0  172.68   12.40
   3  15   0  178.68   13.90
  -3  15   0  169.98   11.90
  -3  15   0  164.88   12.10
   3  15   0  179.38   13.10
   3  15   0  172.78   12.20
  -3  15   0  171.98   12.20
   3  15   0  180.28   12.70
   3  15   0  185.98   10.90
   3  15   0  170.28   13.70
  -3  15   0  179.28   13.10
   4 -15   0  147.49   12.60
   4 -15   0  176.18   13.30
  -4 -15   0  162.78   12.50
   4 -15   0  178.08   13.50
  -4 -15   0  198.08   13.80
   4 -15   0  176.28   12.10
  -4 -15   0  181.18   10.90
  -4 -15   0  182.78   12.70
  -4 -15   0  183.98   10.00
   4 -15   0  139.49   12.30
  -4 -15   0  171.08   13.10
  -4  15   0  165.88   11.70
   4  15   0  177.98   14.20
   4  15   0  170.68   13.40
  -4  15   0  154.98   12.00
  -4  15   0  158.28   12.60
   4  15   0  177.98   12.80
   4  15   0  183.98   10.40
  -4  15   0  166.78   13.60
  -4  15   0  180.88   12.20
   4  15   0  182.88   13.70
   4  15   0  177.48   12.00
  -4  15   0  168.68   11.60
   5 -15   0  174.38   12.60
   5 -15   0  146.29   11.10
   5 -15   0  176.38   13.00
  -5 -15   0  145.59   12.10
  -5 -15   0  161.18   12.40
  -5 -15   0  142.59   11.60
  -5 -15   0  139.99    9.70
   5 -15   0  173.48   12.10
  -5 -15   0  144.59   11.40
  -5 -15   0  139.89    8.50
   5 -15   0  156.48   12.50
   5  15   0  149.69   11.60
   5  15   0  128.99   11.30
   5  15   0  137.09   12.30
   5  15   0  161.28   13.00
  -5  15   0  167.78   11.80
  -5  15   0  157.08   10.70
   5  15   0  147.19   11.00
  -5  15   0  157.48   10.70
  -5  15   0  142.99   11.70
  -5  15   0  147.19   11.20
  -5  15   0  166.08   13.50
  -6 -15   0  964.60   54.59
  -6 -15   0 1054.69   53.79
   6 -15   0 1105.19   53.79
   6 -15   0 1075.29   54.89
  -6 -15   0 1035.20   53.89
   6 -15   0 1062.49   54.89
   6 -15   0 1114.09   54.09
  -6 -15   0 1029.20   52.39
   6 -15   0  994.10   54.89
  -6 -15   0 1060.99   54.69
  -6  15   0 1017.70   54.29
  -6  15   0 1010.30   53.89
  -6  15   0 1037.80   53.29
   6  15   0 1039.00   55.19
  -6  15   0 1086.89   53.09
   6  15   0 1077.89   52.99
   6  15   0  923.41   54.19
   6  15   0  942.41   53.09
  -6  15   0 1041.90   52.69
   6  15   0  987.10   53.99
  -7 -15   0    4.50    2.70
  -7 -15   0    0.00    4.40
   7 -15   0    3.80    4.30
   7 -15   0   -3.90    3.70
  -7 -15   0    5.50    4.60
   7 -15   0    3.40    4.60
  -7 -15   0    0.60    3.40
  -7 -15   0    1.60    2.70
   7 -15   0   -0.70    3.90
   7  15   0   -3.10    4.50
   7  15   0    4.40    3.60
  -7  15   0    2.40    3.20
   7  15   0    5.50    4.20
  -7  15   0   -1.60    3.60
  -7  15   0   -1.60    2.60
   7  15   0    0.90    3.10
   7  15   0    3.00    4.10
  -7  15   0    4.00    4.10
  -7  15   0    0.70    2.70
   8 -15   0  264.57   20.30
  -8 -15   0  262.97   16.30
   8 -15   0  274.17   18.90
  -8 -15   0  266.97   18.50
   8 -15   0  300.37   18.30
  -8 -15   0  274.37   17.40
   8 -15   0  276.87   19.00
  -8 -15   0  285.57   17.70
   8 -15   0  269.87   16.40
  -8  15   0  238.38   16.50
   8  15   0  285.67   18.30
   8  15   0  247.28   18.40
   8  15   0  278.77   19.60
   8  15   0  273.57   17.30
  -8  15   0  283.07   16.50
   8  15   0  296.07   17.10
  -8  15   0  287.37   16.40
   9 -15   0  293.07   18.70
   9 -15   0  240.38   17.90
   9 -15   0  258.57   15.30
  -9 -15   0  227.48   15.90
   9 -15   0  264.57   17.40
   9 -15   0  241.58   17.90
  -9 -15   0  225.88   15.20
  -9 -15   0  218.98   17.20
  -9 -15   0  262.97   16.50
   9  15   0  227.78   17.30
  -9  15   0  261.67   15.20
   9  15   0  255.47   17.00
   9  15   0  248.18   16.20
   9  15   0  262.77   19.10
  -9  15   0  245.98   15.20
  -9  15   0  234.28   15.50
  10 -15   0    5.60    5.10
 -10 -15   0    8.00    5.30
  10 -15   0    6.70    5.10
 -10 -15   0    8.60    3.70
 -10 -15   0   11.50    3.90
  10 -15   0    6.00    5.80
  10 -15   0    6.30    3.40
  10 -15   0    1.10    4.90
  10 -15   0    9.30    5.50
 -10 -15   0   15.40    4.80
  10  15   0   16.20    6.60
  10  15   0    5.40    3.70
 -10  15   0    8.40    3.60
  10  15   0    4.60    4.50
 -10  15   0   10.10    3.50
  10  15   0    7.20    3.90
  10  15   0   14.50    5.50
 -10  15   0    5.80    2.90
 -10  15   0    0.90    1.80
 -11 -15   0    3.30    3.30
  11 -15   0    8.00    3.40
 -11 -15   0    7.90    5.40
  11 -15   0    8.50    6.00
  11 -15   0   17.60    5.80
 -11 -15   0    9.90    3.40
  11 -15   0    5.30    5.50
 -11 -15   0    5.60    3.70
  11 -15   0    1.90    5.70
 -11  15   0    7.30    3.30
  11  15   0    5.40    6.00
  11  15   0    8.50    4.00
 -11  15   0    4.30    3.10
 -11  15   0    9.10    3.10
  11  15   0   -5.20    3.20
  11  15   0    0.80    3.60
  11  15   0    0.20    3.90
  12 -15   0   11.80    5.50
  12 -15   0   15.60    6.60
 -12 -15   0   13.70    5.80
  12 -15   0   25.10    7.20
 -12 -15   0   21.00    5.00
 -12 -15   0   17.30    3.80
 -12 -15   0   14.90    4.70
  12 -15   0   17.00    6.00
  12  15   0   22.30    5.60
 -12  15   0   16.00    3.60
  12  15   0   20.50    6.00
  12  15   0   16.30    7.00
  12  15   0   15.70    4.60
 -12  15   0   18.30    4.00
 -13 -15   0    8.40    5.00
  13 -15   0    2.00    5.20
 -13 -15   0    6.10    3.80
  13 -15   0    7.80    6.60
  13 -15   0    1.00    3.00
  13 -15   0   -2.50    4.80
  13 -15   0    6.10    4.90
 -13 -15   0   -2.20    3.10
 -13  15   0    5.40    3.00
 -13  15   0    4.10    2.50
  13  15   0    4.50    3.60
  13  15   0    8.80    5.20
  13  15   0    3.30    4.40
  13  15   0    4.10    6.90
  14 -15   0   12.80    6.30
 -14 -15   0   24.80    5.20
  14 -15   0   28.30    4.70
  14 -15   0   14.40    6.40
  14 -15   0   31.30    8.80
 -14 -15   0   22.50    5.50
 -14 -15   0   36.10    7.80
  14 -15   0   20.60    6.20
 -14  15   0   26.60    4.40
 -14  15   0   28.70    3.90
  14  15   0   21.60    5.30
  14  15   0   14.90    8.00
  14  15   0   18.20    5.90
  14  15   0   25.90    6.60
  15 -15   0    8.70    5.90
  15 -15   0   41.30   10.70
  15 -15   0   21.90    7.60
 -15 -15   0   24.60    4.90
 -15 -15   0   25.50    7.20
  15 -15   0   35.30    5.60
  15  15   0   32.10    7.10
 -15  15   0   27.70    3.30
  15  15   0   26.20    6.50
 -15  15   0   24.40    4.30
  15  15   0   21.10    9.10
  16 -15   0   46.70    9.30
  16 -15   0   74.19   11.50
 -16 -15   0   54.89    9.50
  16 -15   0   77.99    7.70
  16 -15   0   83.49   12.30
  16 -15   0   65.19   10.80
  16  15   0   70.89   10.00
 -16  15   0   63.59    5.80
  16  15   0   71.49   14.70
  16  15   0   70.49   12.70
  17 -15   0    6.80    3.70
  17 -15   0    2.10    5.70
  17 -15   0   -4.20    6.90
  17 -15   0   -2.80    9.50
 -17 -15   0    4.70    5.80
  17 -15   0    6.40    7.00
  17  15   0   14.40    6.20
  17  15   0    6.50    9.00
  17  15   0    4.80    5.50
  18 -15   0   -1.20    3.50
 -18 -15   0   -5.60    1.90
  18 -15   0    7.30    6.80
  18 -15   0   11.00    7.50
  18 -15   0   -9.50    6.20
 -18 -15   0    2.40    5.20
  18 -15   0   -1.60    6.10
  18  15   0   -3.00    5.30
  18  15   0  -13.80    6.50
  18  15   0    6.00    5.50
  19 -15   0  223.38   21.30
  19 -15   0  236.38   20.10
  19 -15   0  195.08   18.50
 -19 -15   0  222.88   17.90
  19  15   0  251.57   23.20
  19  15   0  210.78   17.00
  19  15   0  226.48   18.10
 -20 -15   0   25.50    6.80
  20 -15   0   17.30    7.80
  20 -15   0   24.50   10.90
  20 -15   0   22.60    7.50
  20  15   0   35.40   11.70
  20  15   0   33.70    7.90
  20  15   0   19.30    6.40
  21 -15   0  184.68   18.50
  21 -15   0  179.78   20.40
  21 -15   0  170.88   19.50
  21  15   0  161.58   21.00
  21  15   0  175.58   15.30
  21  15   0  197.58   17.10
   0 -16   0 1491.65   76.49
   0 -16   0 1548.65   76.39
   0 -16   0 1304.47   75.79
   0 -16   0 1497.45   76.29
   0 -16   0 1518.65   74.29
   0  16   0 1477.45   75.19
   0  16   0 1504.65   76.59
   0  16   0 1463.05   76.09
   0  16   0 1524.85   75.99
   0  16   0 1584.94   77.09
   0  16   0 1449.35   74.49
   0  16   0 1524.45   76.09
  -1 -16   0  101.59   10.00
  -1 -16   0  102.79   10.50
   1 -16   0  112.39   10.50
  -1 -16   0  115.39   10.50
   1 -16   0  108.49    9.90
  -1 -16   0  105.09    9.80
   1 -16   0  115.29   10.40
  -1 -16   0  105.59    8.20
   1 -16   0  102.59   10.30
   1 -16   0   98.59    8.40
  -1 -16   0  110.09    8.10
  -1  16   0  112.69   10.10
   1  16   0  128.39   11.20
   1  16   0  107.69    9.80
   1  16   0  131.79   10.80
  -1  16   0  120.29   11.00
  -1  16   0  112.69    9.60
  -1  16   0  110.19    8.80
   1  16   0  115.19    9.90
   1  16   0  123.99   11.10
  -1  16   0  112.69   10.00
  -1  16   0  127.89   11.10
   1  16   0  121.09    9.50
  -1  16   0  120.09    9.20
   2 -16   0   99.79   10.20
  -2 -16   0  111.89   10.70
  -2 -16   0  102.89    9.80
  -2 -16   0  117.19   10.40
  -2 -16   0  111.39    7.70
   2 -16   0   95.09   10.10
   2 -16   0   97.39    9.80
  -2 -16   0  117.39   10.20
  -2 -16   0  111.09    8.10
   2 -16   0  100.39    8.50
   2 -16   0  107.99   10.30
  -2  16   0  118.29   11.10
  -2  16   0  118.99   11.00
  -2  16   0  108.49    9.10
   2  16   0   98.59   10.50
   2  16   0  116.89    8.00
   2  16   0  102.39    8.90
   2  16   0  106.69   10.90
   2  16   0  112.09    9.80
  -2  16   0  112.19    9.60
  -2  16   0  109.39    9.40
   2  16   0  106.49    9.70
  -2  16   0  103.39    8.80
  -2  16   0  106.99   10.00
  -3 -16   0  216.08   14.80
  -3 -16   0  196.08   14.70
  -3 -16   0  213.08   14.80
   3 -16   0  205.48   14.70
  -3 -16   0  213.88   12.10
  -3 -16   0  195.18   15.10
  -3 -16   0  208.48   12.70
   3 -16   0  195.98   15.10
   3 -16   0  218.08   15.20
   3 -16   0  198.58   13.50
   3 -16   0  207.28   14.90
   3  16   0  236.58   15.90
   3  16   0  219.88   15.50
   3  16   0  221.38   12.50
  -3  16   0  215.68   13.80
  -3  16   0  197.98   13.80
   3  16   0  205.38   14.50
  -3  16   0  198.08   13.80
  -3  16   0  188.98   14.50
  -3  16   0  229.68   15.90
   3  16   0  192.98   13.70
  -3  16   0  218.18   14.30
   3  16   0  196.08   14.40
  -4 -16   0   40.30    6.50
  -4 -16   0   43.90    5.80
   4 -16   0   28.10    6.00
  -4 -16   0   47.90    7.90
  -4 -16   0   48.50    4.30
   4 -16   0   64.69    8.40
   4 -16   0   31.30    5.70
  -4 -16   0   45.60    6.50
   4 -16   0   45.00    7.30
  -4 -16   0   48.50    7.30
   4 -16   0   37.50    7.10
  -4  16   0   60.89    7.10
   4  16   0   41.70    6.50
   4  16   0   42.40    7.40
   4  16   0   43.80    6.80
   4  16   0   40.60    6.20
  -4  16   0   37.30    6.10
  -4  16   0   37.10    5.90
  -4  16   0   47.40    6.10
  -4  16   0   36.50    6.00
   4  16   0   44.70    4.60
   4  16   0   27.20    6.50
  -4  16   0   43.70    8.00
  -5 -16   0   55.69    8.20
   5 -16   0   54.89    7.40
   5 -16   0   58.19    8.10
   5 -16   0   53.39    7.10
  -5 -16   0   49.10    7.60
   5 -16   0   65.69    8.60
  -5 -16   0   51.19    5.50
  -5 -16   0   56.09    4.40
  -5 -16   0   45.70    6.60
   5 -16   0   59.49    8.20
  -5 -16   0   43.50    6.50
  -5  16   0   55.99    7.30
   5  16   0   45.70    6.90
  -5  16   0   54.29    6.50
   5  16   0   29.60    6.40
   5  16   0   46.80    6.60
  -5  16   0   65.99    7.60
  -5  16   0   61.89    6.90
  -5  16   0   60.09    7.50
   5  16   0   54.39    9.00
   5  16   0   68.99    8.50
  -5  16   0   61.39    9.10
  -6 -16   0  255.67   15.40
   6 -16   0  248.48   17.30
   6 -16   0  295.47   18.70
  -6 -16   0  266.97   17.20
  -6 -16   0  257.37   18.10
   6 -16   0  288.77   18.80
   6 -16   0  292.67   17.50
  -6 -16   0  250.67   13.70
  -6 -16   0  264.07   18.30
   6 -16   0  258.77   17.90
  -6 -16   0  256.97   17.30
   6  16   0  273.07   18.40
  -6  16   0  271.07   16.10
  -6  16   0  270.57   17.90
   6  16   0  244.18   17.40
  -6  16   0  268.67   17.50
   6  16   0  252.87   16.70
  -6  16   0  249.38   16.60
   6  16   0  253.57   18.70
  -6  16   0  272.07   16.40
   7 -16   0  185.98   14.00
   7 -16   0  166.98   16.00
   7 -16   0  208.58   15.60
  -7 -16   0  201.58   14.80
  -7 -16   0  203.98   13.80
  -7 -16   0  189.68   13.90
  -7 -16   0  178.88   12.00
   7 -16   0  211.78   15.40
  -7  16   0  183.48   13.10
   7  16   0  194.08   13.00
   7  16   0  195.68   13.60
  -7  16   0  171.78   12.50
   7  16   0  178.98   14.70
   7  16   0  192.88   15.60
  -7  16   0  186.98   16.90
  -7  16   0  173.88   12.30
   7  16   0  207.58   14.40
  -8 -16   0    0.10    3.00
   8 -16   0   -1.30    4.70
   8 -16   0   -2.00    4.10
  -8 -16   0   -0.30    1.60
   8 -16   0    2.50    4.40
   8 -16   0   -3.50    4.20
  -8 -16   0    4.50    4.10
  -8 -16   0    3.00    5.30
  -8  16   0    6.20    3.20
  -8  16   0   -1.70    1.60
   8  16   0   -1.80    3.50
  -8  16   0    1.30    2.80
   8  16   0    4.60    4.90
  -8  16   0    2.40    3.30
   8  16   0    2.70    3.70
   8  16   0    1.20    4.00
   8  16   0    3.30    5.50
   9 -16   0  756.12   39.30
  -9 -16   0  666.23   39.40
   9 -16   0  777.62   40.60
  -9 -16   0  693.73   37.40
  -9 -16   0  692.73   38.30
  -9 -16   0  715.33   38.50
   9 -16   0  721.03   40.50
   9 -16   0  696.43   40.10
   9  16   0  703.53   40.70
   9  16   0  651.53   39.40
  -9  16   0  701.63   37.80
  -9  16   0  683.73   37.30
  -9  16   0  692.33   37.00
   9  16   0  690.83   38.20
   9  16   0  708.13   39.40
   9  16   0  762.02   38.40
 -10 -16   0  142.79   10.90
 -10 -16   0  153.08   11.60
 -10 -16   0  150.78   11.80
  10 -16   0  163.88   13.00
  10 -16   0  143.99   13.60
 -10 -16   0  143.19   13.40
  10 -16   0  135.59   10.50
  10 -16   0  157.38   14.00
 -10  16   0  138.89   10.30
 -10  16   0  140.49   10.40
  10  16   0  145.79   11.70
  10  16   0  159.38   12.50
  10  16   0  145.79   14.30
 -10  16   0  131.09   10.70
  10  16   0  155.38   11.70
  10  16   0  135.29   13.10
  11 -16   0  407.46   26.10
 -11 -16   0  441.26   25.70
  11 -16   0  413.66   25.10
  11 -16   0  433.16   27.00
 -11 -16   0  324.57   22.80
  11 -16   0  427.76   26.40
 -11 -16   0  387.36   23.30
 -11 -16   0  404.16   23.70
 -11  16   0  406.76   22.40
 -11  16   0  384.46   22.40
 -11  16   0  412.66   23.00
  11  16   0  380.26   25.20
  11  16   0  362.56   26.00
  11  16   0  426.96   27.50
  11  16   0  379.26   24.50
  11  16   0  425.06   23.90
  12 -16   0  371.46   26.50
  12 -16   0  438.86   27.30
  12 -16   0  441.56   28.00
 -12 -16   0  399.36   24.40
  12 -16   0  439.76   24.50
  12 -16   0  414.86   25.80
 -12 -16   0  405.96   26.10
 -12 -16   0  406.06   24.20
 -12  16   0  414.26   23.20
  12  16   0  460.75   25.00
  12  16   0  423.46   26.20
  12  16   0  416.16   28.20
 -12  16   0  393.66   23.30
  12  16   0  371.46   25.60
 -12  16   0  420.46   23.10
  13 -16   0  165.68   15.90
 -13 -16   0  158.28   13.10
  13 -16   0  182.78   11.90
 -13 -16   0  172.18   12.70
  13 -16   0  176.48   15.00
  13 -16   0  174.38   15.40
 -13 -16   0  162.58   14.90
  13 -16   0  202.98   16.60
  13  16   0  162.98   14.50
  13  16   0  191.58   13.80
 -13  16   0  171.68   11.50
 -13  16   0  172.48   11.80
  13  16   0  173.98   16.70
  13  16   0  131.49   12.30
  14 -16   0  138.89   15.30
 -14 -16   0  127.39   10.40
  14 -16   0  118.79   13.30
  14 -16   0  112.39   14.60
 -14 -16   0  111.29   12.70
  14 -16   0  115.99    9.50
 -14 -16   0   85.09   10.30
  14 -16   0  133.19   13.30
  14  16   0  131.99   18.00
 -14  16   0  145.39    9.20
  14  16   0  124.19   10.80
  14  16   0  117.19   12.60
 -14  16   0  116.89    9.10
  14  16   0  129.69   11.90
  15 -16   0   41.60    8.80
  15 -16   0   41.50    6.10
  15 -16   0   39.60    9.40
  15 -16   0   48.80   14.10
 -15 -16   0   57.09    6.90
 -15 -16   0   49.00    9.50
  15 -16   0   64.99   11.30
 -15  16   0   39.00    4.70
  15  16   0   68.59   12.50
  15  16   0   42.60    7.00
  15  16   0   57.09    8.60
 -15  16   0   50.99    5.90
  15  16   0   42.50    8.40
  16 -16   0   17.50    4.30
  16 -16   0    6.00    6.30
 -16 -16   0   15.80    6.60
  16 -16   0   15.20    7.30
  16 -16   0   30.60    7.20
  16 -16   0   -5.10    6.40
 -16 -16   0    0.20    2.20
  16  16   0    8.30    5.70
  16  16   0    8.30    5.50
  16  16   0    9.40    4.50
  16  16   0   15.00    8.70
  17 -16   0   18.90   10.00
  17 -16   0   68.39   11.60
  17 -16   0   33.00    8.80
  17 -16   0   52.99    6.40
  17 -16   0   58.89    9.70
 -17 -16   0   26.70    8.00
  17  16   0   53.19    8.70
  17  16   0   61.09   13.10
  17  16   0   44.60    8.90
  17  16   0   33.20    6.30
 -18 -16   0    2.50    6.00
 -18 -16   0   -3.70    2.10
  18 -16   0   -1.20    5.70
  18 -16   0    1.90    6.70
  18 -16   0   -6.20    7.00
  18  16   0    4.70    7.70
  18  16   0   -1.00    5.50
  18  16   0    2.80    5.10
  19 -16   0    7.80    9.10
 -19 -16   0   16.80    7.70
  19 -16   0   -7.10    6.10
  19 -16   0   10.20    7.50
  19  16   0   16.70    6.70
  19  16   0   11.50    9.20
  19  16   0    9.20    5.70
 -20 -16   0   -2.70    5.10
  20 -16   0    8.40    7.50
  20 -16   0   -3.70    6.00
  20  16   0   12.80    6.60
  20  16   0   -2.80    4.80
   0 -17   0   12.00    5.00
   0 -17   0   10.60    3.30
   0 -17   0   15.20    4.70
   0 -17   0    9.50    5.00
   0 -17   0   18.90    4.00
   0 -17   0    6.10    4.70
   0  17   0   18.00    5.10
   0  17   0    8.30    4.10
   0  17   0    3.80    3.80
   0  17   0   12.20    3.60
   0  17   0   18.80    5.50
   0  17   0   16.40    5.60
   0  17   0   10.30    3.90
  -1 -17   0 2076.39  114.19
  -1 -17   0 2277.17  114.69
  -1 -17   0 2281.87  112.49
   1 -17   0 2317.37  114.99
  -1 -17   0 2303.37  114.69
  -1 -17   0 2250.87  111.99
   1 -17   0 2217.78  114.39
   1 -17   0 1923.21  113.79
   1 -17   0 2402.96  114.79
  -1 -17   0 2374.66  114.59
   1 -17   0 2267.97  112.49
   1  17   0 2325.57  112.59
   1  17   0 2283.07  113.49
  -1  17   0 2153.98  114.29
   1  17   0 2374.66  114.89
  -1  17   0 2323.07  115.29
  -1  17   0 2288.47  113.39
  -1  17   0 2231.48  113.89
   1  17   0 2458.55  115.29
   1  17   0 2190.38  114.19
   1  17   0 2302.97  114.09
  -1  17   0 2395.56  115.09
  -1  17   0 2358.36  114.19
   1  17   0 2456.65  115.49
  -1  17   0 2180.08  112.89
  -2 -17   0   44.80    5.30
  -2 -17   0   30.80    5.60
   2 -17   0   20.10    6.00
  -2 -17   0   33.10    6.60
   2 -17   0   35.00    6.70
  -2 -17   0   21.90    6.20
   2 -17   0   27.80    6.10
  -2 -17   0   35.90    4.60
  -2 -17   0   34.90    6.50
   2 -17   0   18.70    4.50
   2 -17   0   23.30    5.90
  -2  17   0   23.00    5.50
  -2  17   0   22.80    5.60
   2  17   0   33.40    5.60
  -2  17   0   21.30    5.60
   2  17   0   23.80    5.50
   2  17   0   29.50    6.10
   2  17   0   39.70    7.10
   2  17   0   22.90    4.10
   2  17   0   40.20    8.00
  -2  17   0   28.30    5.20
  -2  17   0   29.10    6.60
  -2  17   0   29.00    6.50
  -2  17   0   27.50    5.20
  -3 -17   0  322.27   20.80
   3 -17   0  339.97   21.40
   3 -17   0  323.87   19.60
   3 -17   0  346.07   21.90
   3 -17   0  340.27   21.60
  -3 -17   0  339.57   21.30
  -3 -17   0  324.47   21.40
  -3 -17   0  329.87   18.90
  -3 -17   0  314.57   20.80
  -3 -17   0  339.57   18.20
   3 -17   0  304.77   20.70
  -3  17   0  332.17   21.00
  -3  17   0  346.57   20.30
  -3  17   0  342.87   20.00
   3  17   0  352.96   22.00
  -3  17   0  317.47   20.20
   3  17   0  313.87   18.50
  -3  17   0  349.87   22.20
   3  17   0  329.17   20.70
   3  17   0  338.57   21.00
   3  17   0  370.56   22.20
   3  17   0  313.27   20.10
  -3  17   0  338.27   20.10
  -4 -17   0 2257.27  113.39
   4 -17   0 2220.58  113.79
   4 -17   0 2171.28  113.19
  -4 -17   0 2194.18  113.79
  -4 -17   0 2336.67  110.39
  -4 -17   0 2405.06  113.59
   4 -17   0 2171.08  114.09
   4 -17   0 2187.58  112.19
  -4 -17   0 2471.55  114.39
   4 -17   0 2286.17  113.99
  -4 -17   0 2247.68  111.19
  -4  17   0 2177.38  113.49
   4  17   0 2202.58  110.69
   4  17   0 2287.67  113.49
   4  17   0 2334.17  114.39
  -4  17   0 2147.69  112.69
  -4  17   0 2259.87  112.39
   4  17   0 2220.38  112.59
  -4  17   0 2162.98  112.69
  -4  17   0 2206.18  112.29
   4  17   0 2312.87  114.39
  -4  17   0 2390.76  114.79
   4  17   0 2337.57  113.69
   5 -17   0  213.88   15.50
  -5 -17   0  212.18   11.90
   5 -17   0  218.08   14.70
   5 -17   0  205.18   16.40
  -5 -17   0  229.18   15.60
   5 -17   0  237.98   16.60
  -5 -17   0  194.98   14.80
  -5 -17   0  210.98   13.10
   5 -17   0  231.98   16.20
  -5 -17   0  199.38   16.00
   5  17   0  207.58   15.20
  -5  17   0  221.88   14.30
  -5  17   0  192.28   14.60
   5  17   0  228.28   15.70
   5  17   0  204.48   16.20
   5  17   0  219.28   14.80
  -5  17   0  208.68   15.50
  -5  17   0  221.18   14.40
  -5  17   0  236.88   17.10
  -5  17   0  215.08   14.60
   5  17   0  200.18   16.50
   6 -17   0  249.08   18.00
  -6 -17   0  243.98   14.80
   6 -17   0  265.77   17.30
  -6 -17   0  277.27   18.50
   6 -17   0  246.08   16.50
  -6 -17   0  249.08   13.20
  -6 -17   0  228.08   17.40
  -6 -17   0  247.18   16.90
   6 -17   0  245.08   18.20
  -6  17   0  237.98   15.70
   6  17   0  259.07   18.20
   6  17   0  273.57   17.70
   6  17   0  242.78   18.10
   6  17   0  239.48   16.40
  -6  17   0  256.57   15.70
  -6  17   0  235.28   16.10
  -6  17   0  247.28   17.00
   6  17   0  234.88   17.30
   7 -17   0   46.00    7.80
  -7 -17   0   61.69    8.30
   7 -17   0   44.90    7.80
  -7 -17   0   52.69    8.50
   7 -17   0   62.79    8.20
  -7 -17   0   38.80    5.40
  -7 -17   0   46.30    6.80
  -7  17   0   53.09    6.60
   7  17   0   49.30    9.10
   7  17   0   48.80    6.90
  -7  17   0   45.50    7.60
  -7  17   0   49.70    6.40
   7  17   0   48.10    8.40
  -7  17   0   57.19    7.30
   7  17   0   58.19    9.10
   8 -17   0 1006.00   54.69
  -8 -17   0 1024.20   54.49
  -8 -17   0  985.40   53.19
  -8 -17   0  999.60   51.79
   8 -17   0 1005.50   54.99
  -8 -17   0 1044.90   53.29
   8 -17   0 1029.70   53.49
   8 -17   0 1034.70   54.79
  -8  17   0  976.50   52.09
   8  17   0 1043.10   53.99
  -8  17   0  981.70   51.69
   8  17   0  899.21   53.89
   8  17   0 1063.89   54.39
  -8  17   0  996.00   52.59
   8  17   0 1067.79   55.59
   9 -17   0  231.08   17.50
   9 -17   0  210.78   15.90
  -9 -17   0  193.18   16.10
  -9 -17   0  199.48   14.80
   9 -17   0  223.38   17.20
  -9 -17   0  208.98   14.80
  -9 -17   0  216.08   13.80
   9  17   0  185.78   16.10
   9  17   0  203.08   17.60
  -9  17   0  207.28   13.90
   9  17   0  224.58   16.20
   9  17   0  226.68   14.90
  -9  17   0  198.88   13.50
   9  17   0  210.18   15.60
  -9  17   0  214.08   14.40
 -10 -17   0  454.35   28.00
 -10 -17   0  467.25   26.40
  10 -17   0  485.25   29.10
  10 -17   0  473.95   27.40
 -10 -17   0  385.26   25.00
  10 -17   0  505.55   29.10
  10  17   0  452.75   27.30
  10  17   0  439.66   29.20
  10  17   0  418.26   26.10
 -10  17   0  443.36   24.90
  10  17   0  478.75   26.20
 -10  17   0  448.06   25.30
 -10  17   0  432.86   25.50
  10  17   0  432.46   27.70
  11 -17   0   10.90    6.50
  11 -17   0   14.00    6.40
  11 -17   0   14.90    5.80
  11 -17   0   15.80    6.10
 -11 -17   0   12.50    4.40
 -11 -17   0   10.90    3.90
 -11 -17   0   21.40    6.80
  11  17   0   11.10    5.90
  11  17   0   15.70    7.10
 -11  17   0   17.90    4.50
 -11  17   0   13.50    3.80
  11  17   0   13.20    4.70
  11  17   0   17.80    5.30
 -11  17   0   10.80    3.60
 -12 -17   0   10.10    4.60
 -12 -17   0    7.50    6.10
 -12 -17   0   14.60    4.40
  12 -17   0   10.70    6.70
  12 -17   0    3.50    3.20
  12 -17   0    1.00    5.10
  12 -17   0   -0.20    5.00
  12 -17   0    4.00    5.40
  12  17   0   -0.30    3.90
  12  17   0   -1.40    3.80
 -12  17   0    1.20    3.00
  12  17   0   12.60    5.80
  12  17   0    2.30    6.70
 -12  17   0    1.10    3.00
 -12  17   0    6.20    3.60
 -13 -17   0  220.38   14.90
  13 -17   0  192.28   13.40
  13 -17   0  221.38   18.70
 -13 -17   0  199.78   15.10
  13 -17   0  218.38   24.10
  13 -17   0  206.48   17.20
 -13 -17   0  183.88   16.70
  13 -17   0  214.68   18.20
  13  17   0  197.58   15.00
  13  17   0  240.38   15.80
 -13  17   0  219.78   14.00
 -13  17   0  207.98   13.60
  13  17   0  214.68   17.20
  13  17   0  218.98   19.60
  14 -17   0  180.88   17.10
  14 -17   0  194.88   16.70
  14 -17   0  182.08   12.50
 -14 -17   0  182.28   16.20
  14 -17   0  170.58   16.40
 -14 -17   0  183.98   13.40
  14  17   0  191.58   14.90
  14  17   0  199.08   14.30
  14  17   0  196.88   16.20
 -14  17   0  181.58   12.20
 -14  17   0  197.28   12.70
  14  17   0  175.68   18.10
 -15 -17   0   53.39    9.60
  15 -17   0   52.69   11.20
  15 -17   0   56.29    6.60
  15 -17   0   48.00    9.70
  15 -17   0   47.30   10.20
  15 -17   0   39.80    9.00
  15  17   0   73.89    9.70
 -15  17   0   53.29    5.50
  15  17   0   47.90    9.60
  15  17   0   69.79   12.70
 -15  17   0   52.19    6.40
  16 -17   0   -1.80    6.30
 -16 -17   0   -2.40    1.70
  16 -17   0   -0.70    6.30
 -16 -17   0    5.60    5.80
  16 -17   0    9.00    5.90
  16 -17   0   -0.50    3.10
  16 -17   0   -0.70    6.80
 -16  17   0   -6.20    2.60
  16  17   0    4.60    7.70
  16  17   0    5.70    5.60
  16  17   0    7.10    5.50
 -16  17   0   -2.40    1.10
  17 -17   0  173.88   16.80
  17 -17   0  155.28   16.40
 -17 -17   0  149.49   15.10
  17 -17   0  140.19   11.10
  17 -17   0  155.38   18.80
  17  17   0  161.38   15.30
  17  17   0  163.88   14.60
  17  17   0  193.08   19.30
  18 -17   0   33.80    9.00
  18 -17   0   32.00   10.20
  18 -17   0   27.20    8.40
  18  17   0   38.50   11.30
  18  17   0   36.80    8.00
  18  17   0   31.30    8.20
 -19 -17   0  361.86   25.80
  19 -17   0  382.46   28.30
  19 -17   0  403.96   27.30
  19 -17   0  397.36   29.20
  19  17   0  378.86   25.70
  19  17   0  357.26   25.80
  19  17   0  443.46   31.70
  20 -17   0   29.70   10.80
  20 -17   0   48.90   10.70
  20 -17   0   55.79   16.60
 -20 -17   0   44.80    8.60
  20  17   0   45.00    8.60
  20  17   0   41.20    8.50
  20  17   0   47.40   11.30
   0 -18   0  214.58   13.40
   0 -18   0  197.08   15.50
   0 -18   0  169.58   15.30
   0 -18   0  189.88   15.10
   0 -18   0  218.28   13.70
   0 -18   0  220.18   16.00
   0  18   0  232.38   16.70
   0  18   0  205.58   14.40
   0  18   0  198.18   15.40
   0  18   0  214.08   15.10
   0  18   0  225.28   15.70
   0  18   0  242.48   16.80
   0  18   0  215.48   13.80
  -1 -18   0  206.88   12.70
   1 -18   0  195.78   15.50
   1 -18   0  184.38   15.30
   1 -18   0  175.08   15.00
  -1 -18   0  204.28   15.20
   1 -18   0  195.18   15.00
   1 -18   0  207.78   13.50
  -1 -18   0  218.98   13.10
   1 -18   0  204.98   13.20
  -1 -18   0  238.28   22.80
  -1 -18   0  209.98   15.20
  -1 -18   0  189.28   15.40
  -1  18   0  201.08   14.30
  -1  18   0  196.28   15.90
   1  18   0  202.08   13.10
   1  18   0  214.58   16.40
   1  18   0  213.78   15.60
  -1  18   0  199.38   13.50
   1  18   0  198.18   14.80
  -1  18   0  176.38   13.60
   1  18   0  204.48   14.60
   1  18   0  232.98   16.10
   1  18   0  193.28   13.90
  -1  18   0  197.18   15.50
  -1  18   0  184.68   14.80
   2 -18   0  318.57   23.40
  -2 -18   0  401.46   24.00
   2 -18   0  394.16   24.50
  -2 -18   0  371.56   21.00
  -2 -18   0  366.26   23.60
  -2 -18   0  366.56   24.00
   2 -18   0  387.56   22.20
  -2 -18   0  378.46   21.40
   2 -18   0  379.46   24.00
  -2 -18   0  393.46   24.00
   2 -18   0  393.36   24.00
   2  18   0  412.46   24.40
  -2  18   0  403.16   24.60
   2  18   0  406.86   21.60
  -2  18   0  379.06   24.70
  -2  18   0  371.46   23.00
   2  18   0  445.96   25.40
   2  18   0  393.46   23.80
   2  18   0  344.97   23.00
   2  18   0  399.96   24.40
  -2  18   0  367.26   22.40
  -2  18   0  408.56   23.40
   2  18   0  351.26   22.40
  -2  18   0  391.26   22.60
  -2  18   0  381.26   23.80
  -3 -18   0   20.20    6.20
   3 -18   0   16.80    5.80
  -3 -18   0   18.90    5.00
   3 -18   0   20.50    6.00
  -3 -18   0   14.60    3.30
  -3 -18   0   18.10    3.80
   3 -18   0   13.70    5.70
  -3 -18   0   11.90    4.40
   3 -18   0   12.30    5.60
  -3 -18   0   26.90    6.20
   3 -18   0   23.10    5.10
   3  18   0   15.50    3.50
  -3  18   0   18.70    5.60
   3  18   0   18.00    5.60
   3  18   0   16.70    4.70
  -3  18   0   28.70    7.10
  -3  18   0   17.80    4.90
   3  18   0   25.90    6.90
  -3  18   0   14.90    4.60
   3  18   0   18.60    6.20
   3  18   0   12.10    4.40
  -3  18   0   21.50    5.40
  -3  18   0   24.50    5.40
   4 -18   0  200.58   16.10
  -4 -18   0  230.38   13.10
   4 -18   0  241.38   17.20
   4 -18   0  231.28   17.20
   4 -18   0  231.98   18.60
  -4 -18   0  245.38   17.20
  -4 -18   0  221.68   16.40
  -4 -18   0  231.08   13.90
   4 -18   0  194.48   14.80
  -4  18   0  206.08   17.20
   4  18   0  239.38   16.50
   4  18   0  241.98   17.70
  -4  18   0  223.48   15.60
  -4  18   0  219.08   15.20
   4  18   0  243.68   17.50
  -4  18   0  232.08   16.50
   4  18   0  227.48   13.50
   4  18   0  232.68   15.50
  -4  18   0  220.98   15.30
  -4  18   0  217.78   14.90
   5 -18   0   14.10    5.20
  -5 -18   0    0.00    2.10
  -5 -18   0   18.90    5.60
  -5 -18   0   11.90    3.30
   5 -18   0    5.60    4.60
  -5 -18   0   12.70    4.30
   5 -18   0    4.90    4.80
   5 -18   0    5.20    4.80
  -5 -18   0    5.50    5.90
   5 -18   0   19.90    6.70
  -5 -18   0    7.50    2.50
   5  18   0    5.60    5.30
  -5  18   0    9.50    4.10
   5  18   0   13.70    5.30
  -5  18   0   10.30    4.40
  -5  18   0   18.60    7.00
  -5  18   0    9.30    5.50
  -5  18   0   14.20    4.70
   5  18   0    9.80    4.50
  -5  18   0   11.10    4.60
   5  18   0   13.50    6.20
  -6 -18   0    4.60    3.90
   6 -18   0    9.80    4.90
   6 -18   0   10.20    5.30
   6 -18   0    7.50    5.30
   6 -18   0    3.00    4.50
  -6 -18   0    6.00    5.70
  -6 -18   0    4.20    2.80
  -6 -18   0    7.60    2.00
   6 -18   0    9.30    5.00
  -6 -18   0    3.60    4.10
   6  18   0    2.80    4.40
  -6  18   0    9.60    4.00
   6  18   0    3.70    5.30
  -6  18   0    6.30    4.70
   6  18   0    4.50    4.20
  -6  18   0    5.60    4.00
  -6  18   0    3.20    3.60
  -6  18   0   11.60    4.60
   6  18   0    0.70    3.80
   6  18   0    2.90    4.70
  -7 -18   0    2.60    5.30
  -7 -18   0    6.60    4.30
  -7 -18   0    3.60    3.90
   7 -18   0   11.40    5.70
  -7 -18   0    7.30    3.30
   7 -18   0    2.90    4.30
   7 -18   0   12.20    5.40
   7 -18   0   12.50    5.30
   7 -18   0    4.00    4.90
   7  18   0    3.80    4.90
  -7  18   0    7.70    3.80
   7  18   0    4.30    5.30
  -7  18   0    3.20    4.10
   7  18   0    6.40    5.40
  -7  18   0    9.70    3.90
  -7  18   0    0.30    2.80
   7  18   0   -2.90    3.60
   8 -18   0   82.89   10.60
  -8 -18   0   85.79   11.00
   8 -18   0  107.89   10.60
   8 -18   0  100.59   12.10
  -8 -18   0   81.79    9.70
  -8 -18   0   88.69    8.90
  -8 -18   0   81.89    7.50
  -8  18   0   89.19    8.80
   8  18   0   82.89   10.40
  -8  18   0   88.79    8.20
   8  18   0  101.89    9.40
   8  18   0   81.69    9.10
  -8  18   0   80.09    8.30
   8  18   0   84.89   10.40
   8  18   0   96.29   12.30
  -9 -18   0  725.23   38.90
  -9 -18   0  694.53   37.60
   9 -18   0  782.12   39.90
   9 -18   0  672.03   40.80
  -9 -18   0  683.63   40.20
   9 -18   0  738.03   41.00
  -9  18   0  655.43   38.00
   9  18   0  744.63   41.70
   9  18   0  757.22   38.50
   9  18   0  670.13   38.60
  -9  18   0  699.83   37.80
  -9  18   0  706.13   37.40
   9  18   0  703.03   41.10
   9  18   0  652.33   40.00
 -10 -18   0   -4.00    3.40
  10 -18   0   -3.40    4.70
  10 -18   0    8.80    5.60
 -10 -18   0    2.20    3.10
 -10 -18   0   -7.50    5.00
  10 -18   0   -1.30    4.60
 -10  18   0   -3.10    3.00
 -10  18   0    4.00    3.40
 -10  18   0    2.50    2.80
  10  18   0    1.90    3.70
  10  18   0    1.20    6.40
  10  18   0    1.30    4.90
  10  18   0    0.40    3.90
  11 -18   0  124.59   13.50
 -11 -18   0  118.89   10.70
 -11 -18   0  116.09   13.40
  11 -18   0  132.59   12.70
 -11 -18   0  121.09   10.00
  11 -18   0  118.69   14.10
  11  18   0  143.29   16.10
  11  18   0  118.49   10.80
  11  18   0  104.39   12.30
  11  18   0   87.09   10.00
 -11  18   0  113.69    9.50
 -11  18   0   95.29    9.20
 -11  18   0  119.19    9.10
  12 -18   0   56.59    9.30
 -12 -18   0   68.79   10.90
  12 -18   0   69.59   11.80
 -12 -18   0   65.19    8.00
  12 -18   0   83.19   12.00
  12 -18   0   51.79    9.30
 -12  18   0   57.89    6.90
  12  18   0   44.30    8.40
  12  18   0   52.69   11.00
 -12  18   0   73.29    7.00
 -12  18   0   69.39    8.20
  12  18   0   64.99    8.40
  13 -18   0  149.88   20.80
 -13 -18   0  123.19   14.00
 -13 -18   0  150.28   12.50
 -13 -18   0  143.99   12.00
  13 -18   0  149.79   15.70
  13 -18   0  140.49   14.90
  13  18   0  159.18   13.00
  13  18   0  155.58   14.80
 -13  18   0  148.79   11.10
 -13  18   0  140.49   11.30
  14 -18   0   92.19   13.60
 -14 -18   0   91.49    9.10
  14 -18   0   72.99   10.90
  14 -18   0  101.89   12.90
 -14 -18   0   92.99   12.40
  14 -18   0  101.79   13.10
 -14  18   0   93.39    8.50
  14  18   0   81.79   13.30
 -14  18   0   80.59    8.10
  14  18   0   78.89   10.10
  15 -18   0   11.30    8.30
  15 -18   0   11.10    7.80
  15 -18   0   30.40    9.20
 -15 -18   0   22.30    7.70
  15 -18   0   16.70    7.50
  15  18   0   23.50    6.40
 -15  18   0   40.40    5.40
  15  18   0   29.40   10.20
  15  18   0   14.80    6.40
 -15  18   0   36.30    5.90
  16 -18   0   -4.50    6.10
  16 -18   0  -10.90    6.20
  16 -18   0    3.20    6.90
 -16 -18   0    7.60    6.70
  16  18   0   -3.90    4.60
  16  18   0   -3.40    7.90
  16  18   0  -11.50    4.20
 -16  18   0   -2.80    3.10
 -16  18   0   -4.80    1.60
 -17 -18   0   -2.70    2.30
  17 -18   0   11.50    6.80
 -17 -18   0    6.30    7.60
  17 -18   0    7.80    7.80
  17 -18   0    2.50    6.60
  17  18   0    1.80    5.50
  17  18   0   -1.10    5.70
  17  18   0   26.50   10.10
  18 -18   0    2.20    6.50
 -18 -18   0   12.00    6.70
  18 -18   0    4.00    7.20
  18 -18   0    2.50    7.50
  18  18   0    7.90    5.80
  18  18   0    0.50    7.60
  18  18   0    8.60    6.40
  19 -18   0   62.79   11.30
  19 -18   0   32.50   11.20
  19 -18   0   48.30   10.90
 -19 -18   0   56.99   10.70
  19  18   0   40.90    8.90
  19  18   0   55.19    9.60
  19  18   0   44.60   14.60
  20 -18   0   79.69   13.20
  20 -18   0   65.29   13.60
 -20 -18   0   59.19   10.20
  20 -18   0   69.49   11.70
  20  18   0   60.29    9.90
  20  18   0   57.89    9.70
  20  18   0   77.19   14.00
   0 -19   0    4.00    5.40
   0 -19   0    7.50    5.50
   0 -19   0    6.00    4.60
   0 -19   0    9.20    3.80
   0 -19   0    6.80    3.40
   0  19   0    1.60    4.10
   0  19   0    4.30    3.20
   0  19   0   19.50    6.20
   0  19   0   18.50    6.00
   0  19   0   10.80    5.20
   0  19   0    8.50    5.00
   0  19   0    1.20    4.00
   1 -19   0 1522.05   78.09
  -1 -19   0 1453.55   80.29
  -1 -19   0 1649.23   80.69
   1 -19   0 1630.24   80.79
   1 -19   0 1563.94   80.99
   1 -19   0 1288.97   79.59
  -1 -19   0 1520.45   77.59
  -1 -19   0 1538.15   77.99
   1 -19   0 1548.45   78.59
  -1  19   0 1475.45   79.19
   1  19   0 1575.34   80.49
  -1  19   0 1506.75   79.69
   1  19   0 1691.03   81.39
  -1  19   0 1586.44   80.59
   1  19   0 1543.95   78.19
   1  19   0 1719.43   81.79
   1  19   0 1570.14   80.49
  -1  19   0 1592.04   79.99
  -1  19   0 1564.14   81.39
  -1  19   0 1641.04   81.29
  -1  19   0 1551.24   78.69
  -2 -19   0   87.49    7.70
  -2 -19   0  101.59   11.50
   2 -19   0  104.49    9.10
   2 -19   0   95.09   11.10
  -2 -19   0   90.39    7.70
  -2 -19   0   80.29    9.90
   2 -19   0   70.19   10.10
   2 -19   0   96.29   10.90
  -2  19   0   88.99    9.10
   2  19   0   92.29   11.00
  -2  19   0  118.89   12.50
   2  19   0   88.19    8.00
  -2  19   0   90.49    9.50
   2  19   0  103.09   10.60
  -2  19   0   80.79   10.70
  -2  19   0   87.59   10.20
  -2  19   0   84.79    8.90
   2  19   0  106.19   11.80
  -2  19   0  105.99   11.80
   2  19   0  109.69   11.10
   3 -19   0  461.05   28.60
  -3 -19   0  509.95   28.90
  -3 -19   0  475.15   24.70
   3 -19   0  455.05   26.10
   3 -19   0  413.16   27.50
  -3 -19   0  445.36   29.80
  -3 -19   0  473.55   25.20
   3 -19   0  453.65   28.10
   3  19   0  520.65   29.30
   3  19   0  499.75   29.20
  -3  19   0  436.36   26.50
  -3  19   0  419.36   26.80
   3  19   0  480.85   25.40
  -3  19   0  468.35   28.80
  -3  19   0  450.05   28.60
   3  19   0  488.25   28.00
  -3  19   0  421.86   26.20
  -3  19   0  420.96   27.40
  -4 -19   0  389.86   24.50
   4 -19   0  407.36   25.60
  -4 -19   0  381.56   25.10
  -4 -19   0  376.16   21.80
   4 -19   0  400.66   23.30
   4 -19   0  380.66   24.50
   4 -19   0  381.06   25.10
  -4 -19   0  411.66   21.20
   4  19   0  425.76   25.80
   4  19   0  385.26   21.60
  -4  19   0  385.26   24.60
  -4  19   0  383.76   23.20
  -4  19   0  400.76   23.50
  -4  19   0  348.67   23.40
  -4  19   0  408.36   23.90
   4  19   0  398.16   24.70
   4  19   0  362.36   23.50
   4  19   0  433.36   26.00
  -4  19   0  421.16   26.20
   5 -19   0   39.80    6.70
  -5 -19   0   41.80    5.40
   5 -19   0   42.40    7.90
   5 -19   0   40.80    7.80
   5 -19   0   53.79    8.80
  -5 -19   0   37.70    8.40
  -5 -19   0   38.70    7.10
  -5 -19   0   42.90    4.50
   5  19   0   38.40    8.60
  -5  19   0   40.10    6.40
  -5  19   0   41.20    6.60
   5  19   0   26.40    6.90
  -5  19   0   36.90    6.90
   5  19   0   47.40    7.80
  -5  19   0   34.90    6.70
   5  19   0   31.20    6.30
  -5  19   0   49.60    8.90
  -5  19   0   41.00    6.50
   5  19   0   26.40    6.60
  -6 -19   0   69.39    6.70
   6 -19   0   77.49    9.90
  -6 -19   0   58.49    8.00
  -6 -19   0   87.89   10.10
   6 -19   0   94.79   11.70
   6 -19   0   82.19   11.30
   6 -19   0   68.19    8.60
  -6 -19   0   80.19   10.80
  -6 -19   0   64.59    5.30
  -6  19   0   71.59    8.70
  -6  19   0   65.59    8.00
   6  19   0   79.29   10.70
  -6  19   0   67.09    8.30
  -6  19   0   87.89   10.90
   6  19   0   95.69   10.80
   6  19   0   64.79    8.50
   6  19   0   54.99    8.90
   6  19   0   73.69    9.60
  -6  19   0   73.59    9.10
  -7 -19   0   27.50    7.70
   7 -19   0   43.20   13.10
   7 -19   0   28.90    6.60
   7 -19   0   30.80    7.70
  -7 -19   0   31.50    4.80
  -7 -19   0   37.10    7.10
   7 -19   0   29.00    6.90
   7  19   0   26.10    6.80
   7  19   0   22.50    6.10
  -7  19   0   26.70    5.50
   7  19   0   23.10    5.80
   7  19   0   30.40    8.10
  -7  19   0   23.00    5.40
  -7  19   0   29.30    5.50
  -7  19   0   41.70   10.60
  -8 -19   0  276.57   19.70
  -8 -19   0  274.17   16.20
   8 -19   0  247.18   25.80
  -8 -19   0  283.47   18.30
   8 -19   0  258.97   18.20
   8 -19   0  281.87   20.00
   8  19   0  254.07   17.70
   8  19   0  256.97   19.50
  -8  19   0  251.57   17.10
  -8  19   0  245.28   16.20
  -8  19   0  235.48   16.60
   8  19   0  257.47   20.10
   9 -19   0   41.70    8.10
   9 -19   0   45.90    7.80
  -9 -19   0   54.49    9.40
  -9 -19   0   54.99    6.50
  -9 -19   0   37.30    6.70
   9 -19   0   51.59    8.90
  -9  19   0   45.30    6.10
   9  19   0   42.00    9.00
   9  19   0   51.79    7.40
  -9  19   0   59.79    7.30
   9  19   0   34.70    8.90
  -9  19   0   46.30    6.90
   9  19   0   37.00    8.20
  10 -19   0   -5.10    4.80
 -10 -19   0    1.30    4.00
 -10 -19   0    3.50    5.60
  10 -19   0    1.80    4.80
 -10 -19   0    5.40    3.20
  10 -19   0    5.00    5.50
  10  19   0    5.80    5.40
 -10  19   0   -3.50    3.20
  10  19   0    9.40    4.40
  10  19   0   -2.40    5.90
 -10  19   0    4.00    3.40
 -10  19   0    6.50    3.60
  11 -19   0  107.69   12.00
  11 -19   0  102.99   13.10
  11 -19   0   83.49   11.90
 -11 -19   0   85.39   12.10
  11 -19   0   82.39   12.20
 -11 -19   0   88.79    8.80
 -11 -19   0   91.99    9.70
  11  19   0   75.99   12.30
 -11  19   0   72.59    8.50
 -11  19   0   85.99    8.00
  11  19   0   82.29   11.70
  11  19   0   84.79    9.50
 -11  19   0   91.89    8.80
 -12 -19   0   23.30    7.80
  12 -19   0   48.20    9.70
 -12 -19   0   49.99    7.20
 -12 -19   0   30.10    6.10
  12 -19   0   27.10    8.80
  12 -19   0   32.20    8.00
  12 -19   0   38.20    9.80
 -12  19   0   27.60    5.50
 -12  19   0   36.20    5.60
  12  19   0   30.10    8.20
  12  19   0   31.10    6.70
 -12  19   0   43.90    6.70
  12  19   0   33.80   10.70
  13 -19   0  261.47   30.60
 -13 -19   0  187.68   14.10
  13 -19   0  198.38   16.60
 -13 -19   0  160.68   16.30
  13 -19   0  205.28   18.00
  13 -19   0  160.58   16.50
 -13 -19   0  177.48   14.40
  13  19   0  189.98   14.80
  13  19   0  212.58   21.20
 -13  19   0  171.98   13.10
  13  19   0  198.48   18.80
 -13  19   0  185.18   13.20
  14 -19   0    4.90    6.80
 -14 -19   0    3.90    3.00
  14 -19   0   18.00    7.10
  14 -19   0   27.40    8.00
 -14 -19   0    2.90    6.10
  14  19   0   16.50    6.00
  14  19   0   19.10    6.90
 -14  19   0   11.90    4.30
 -14  19   0   19.80    4.80
  14  19   0   12.90    8.70
  15 -19   0  241.08   19.30
  15 -19   0  264.87   21.20
  15 -19   0  244.28   21.20
 -15 -19   0  198.38   19.00
  15  19   0  200.28   18.30
  15  19   0  230.08   17.60
 -15  19   0  239.88   14.90
  15  19   0  271.77   22.90
 -15  19   0  213.68   15.00
  16 -19   0   37.70    9.70
  16 -19   0   55.19   11.80
  16 -19   0   50.29   10.30
 -16 -19   0   51.69    9.70
 -16  19   0   27.50    5.60
  16  19   0   52.49    8.70
  16  19   0   53.19   12.60
  16  19   0   56.69    9.70
  17 -19   0    4.00    6.30
  17 -19   0   -7.30    6.70
 -17 -19   0   -1.20    5.70
  17 -19   0    0.10    7.30
  17  19   0    4.10    8.60
  17  19   0   -1.60    5.10
 -18 -19   0  113.89   13.90
  18 -19   0   87.09   13.10
  18 -19   0   86.79   14.30
  18 -19   0  121.39   16.10
  18  19   0   96.19   12.50
  18  19   0   84.69   11.70
  18  19   0   94.39   15.60
  19 -19   0   23.80    9.40
  19 -19   0    6.30    9.30
 -19 -19   0   24.40    7.80
  19  19   0    7.10    9.50
  19  19   0   39.20    8.60
  19  19   0   18.20    6.30
   0 -20   0  375.76   26.00
   0 -20   0  419.36   26.40
   0 -20   0  397.96   23.30
   0 -20   0  398.76   23.60
   0 -20   0  405.56   26.10
   0  20   0  443.36   26.10
   0  20   0  427.56   24.00
   0  20   0  450.85   27.20
   0  20   0  391.36   25.70
   0  20   0  409.56   25.10
   0  20   0  454.75   27.40
   1 -20   0   42.30    8.10
   1 -20   0   59.29    7.30
   1 -20   0   74.49   10.40
  -1 -20   0   56.39    6.60
  -1 -20   0   49.60    8.40
  -1 -20   0   31.50    6.50
   1 -20   0   49.90    8.30
   1 -20   0   65.99    7.40
  -1 -20   0   47.10    8.90
  -1  20   0   58.39    8.50
  -1  20   0   55.99    8.00
  -1  20   0   58.09    9.60
   1  20   0   67.29    9.60
  -1  20   0   55.59    8.40
   1  20   0   66.99    9.60
   1  20   0   65.49   10.10
   1  20   0   62.19    6.90
   1  20   0   56.59    9.30
  -1  20   0   63.09    8.30
  -1  20   0   59.79    9.70
  -1  20   0   61.49    7.50
   2 -20   0  113.59   12.10
  -2 -20   0   98.49    8.40
  -2 -20   0  106.49   11.70
  -2 -20   0  104.89    8.70
   2 -20   0  117.39   12.30
   2 -20   0   84.69   11.30
   2 -20   0   86.39    9.20
  -2 -20   0  125.09   12.70
  -2  20   0  119.59   10.80
  -2  20   0   92.29   12.50
   2  20   0  123.89   11.50
   2  20   0  107.89   11.90
  -2  20   0   94.09    9.60
  -2  20   0  100.59   10.00
   2  20   0  113.49    9.00
   2  20   0  135.99   13.20
  -2  20   0  101.09   11.80
  -2  20   0  104.99   10.80
   2  20   0  130.09   12.30
   3 -20   0  229.98   18.00
   3 -20   0  225.08   17.80
  -3 -20   0  222.78   14.30
   3 -20   0  233.18   16.00
   3 -20   0  249.08   18.80
  -3 -20   0  245.18   14.90
  -3 -20   0  239.68   17.90
  -3 -20   0  256.97   18.80
  -3  20   0  227.28   16.70
   3  20   0  279.27   19.50
  -3  20   0  231.18   17.90
   3  20   0  253.47   15.10
  -3  20   0  233.28   16.20
  -3  20   0  219.38   17.50
   3  20   0  277.27   18.90
   3  20   0  227.48   17.50
  -3  20   0  261.87   19.30
  -3  20   0  236.98   16.40
   3  20   0  274.97   19.20
  -4 -20   0  404.06   26.10
   4 -20   0  400.26   23.90
  -4 -20   0  401.06   22.40
   4 -20   0  397.66   25.90
  -4 -20   0  399.96   21.70
   4 -20   0  415.96   26.40
   4 -20   0  369.46   25.10
  -4 -20   0  379.06   27.00
   4  20   0  430.56   26.70
  -4  20   0  416.26   25.50
   4  20   0  426.46   22.50
  -4  20   0  380.56   24.20
  -4  20   0  377.26   24.10
  -4  20   0  436.56   27.10
  -4  20   0  401.96   24.00
   4  20   0  375.26   25.00
   4  20   0  378.56   24.00
   4  20   0  420.46   26.60
   5 -20   0   13.20    5.80
   5 -20   0   20.20    7.50
  -5 -20   0   15.70    3.40
   5 -20   0   22.50    7.10
  -5 -20   0   13.80    5.10
   5 -20   0   15.50    5.40
  -5 -20   0   13.90    6.90
  -5 -20   0   15.40    3.10
   5 -20   0    4.20    3.80
  -5  20   0   17.90    5.80
   5  20   0    8.50    6.10
  -5  20   0   13.10    5.10
   5  20   0   13.50    5.20
  -5  20   0    9.80    4.40
   5  20   0   15.60    6.70
   5  20   0    7.70    4.70
   5  20   0    3.90    5.60
  -5  20   0   19.50    8.00
  -5  20   0    9.90    4.90
  -6 -20   0  218.48   18.40
   6 -20   0  233.78   17.10
   6 -20   0  272.57   18.30
  -6 -20   0  243.38   15.00
  -6 -20   0  259.37   13.60
   6 -20   0  240.68   19.00
  -6 -20   0  242.58   17.60
   6 -20   0  235.88   18.90
   6  20   0  255.17   19.70
   6  20   0  281.57   19.90
  -6  20   0  259.27   18.70
   6  20   0  248.18   17.90
  -6  20   0  222.88   15.90
  -6  20   0  220.98   17.70
   7 -20   0   55.69    8.30
  -7 -20   0   42.40    8.10
   7 -20   0   53.59    9.60
   7 -20   0   78.79   10.00
  -7 -20   0   62.89    6.50
   7 -20   0   73.39   11.00
  -7 -20   0   57.69   10.00
  -7  20   0   54.49    7.30
   7  20   0   55.49   10.60
  -7  20   0   43.60    8.60
   7  20   0   37.20    8.10
   8 -20   0   46.10    9.10
   8 -20   0   59.39    9.00
  -8 -20   0   37.10    8.60
   8 -20   0   53.69    9.50
  -8 -20   0   26.60    6.20
  -8 -20   0   39.50    5.70
   8  20   0   48.70    9.10
  -8  20   0   44.10    6.30
   8  20   0   45.90    9.40
  -8  20   0   40.50    7.70
   9 -20   0  164.08   14.40
  -9 -20   0  161.68   13.70
   9 -20   0  167.48   15.50
   9 -20   0  166.98   15.80
  -9 -20   0  174.38   12.00
  -9 -20   0  166.88   15.50
   9  20   0  161.88   15.50
  -9  20   0  168.28   13.90
  -9  20   0  155.28   13.90
  -9  20   0  153.18   11.70
   9  20   0  184.68   16.40
 -10 -20   0  319.67   20.20
  10 -20   0  304.27   20.90
  10 -20   0  260.87   21.50
 -10 -20   0  302.17   18.60
  10 -20   0  326.77   22.60
 -10 -20   0  290.97   21.70
 -10  20   0  305.37   19.10
  10  20   0  269.47   21.50
 -10  20   0  299.07   19.50
  10  20   0  278.77   22.60
  10  20   0  305.67   19.50
 -10  20   0  305.27   18.20
  11 -20   0  160.58   15.50
 -11 -20   0  132.29   14.70
  11 -20   0  134.99   16.00
  11 -20   0  120.29   13.60
 -11 -20   0  155.68   12.70
 -11 -20   0  122.09   11.20
  11 -20   0  160.08   15.80
  11  20   0  150.28   14.80
  11  20   0  129.19   12.10
 -11  20   0  147.39   11.90
 -11  20   0  122.89   11.20
  11  20   0  157.08   16.00
 -11  20   0  145.29   10.70
 -12 -20   0  296.77   20.20
  12 -20   0  328.37   24.20
 -12 -20   0  310.97   20.90
  12 -20   0  327.27   22.70
  12 -20   0  354.86   25.00
 -12 -20   0  303.87   23.30
  12  20   0  355.66   28.20
  12  20   0  333.17   21.30
  12  20   0  357.96   25.70
 -12  20   0  340.97   20.40
 -12  20   0  301.67   20.20
 -12  20   0  337.27   19.40
  13 -20   0   53.59   10.00
  13 -20   0   62.49   11.20
 -13 -20   0   59.59    8.00
 -13 -20   0   48.80   10.20
  13 -20   0   48.40   10.40
  13  20   0   48.70    9.30
 -13  20   0   54.19    7.20
  13  20   0   61.49    8.70
 -13  20   0   61.59    7.60
  13  20   0   51.29   11.80
  14 -20   0   36.80   10.10
  14 -20   0   52.99   11.00
  14 -20   0   60.79   10.70
 -14  20   0   52.29    7.00
  14  20   0   35.40    8.90
 -14  20   0   40.80    6.40
  14  20   0   66.99    9.40
  14  20   0   60.29   12.90
  15 -20   0   51.59   11.40
 -15 -20   0   61.99   11.00
  15 -20   0   84.89   13.60
  15 -20   0   76.29   12.20
 -15  20   0   70.09    7.80
  15  20   0   62.49   10.50
  15  20   0   64.29   13.40
  15  20   0   68.19    9.90
 -15  20   0   80.39    8.60
  16 -20   0   71.39   12.90
  16 -20   0   68.79   12.50
  16 -20   0   50.29   10.30
 -16 -20   0   71.09   11.80
  16  20   0   75.49   10.30
  16  20   0   68.59   13.30
  16  20   0   64.29   10.60
  17 -20   0   -1.00    5.90
 -17 -20   0   15.10    7.00
  17 -20   0   10.90    7.60
  17 -20   0   11.00    8.00
  17  20   0   10.10    8.50
  17  20   0    1.90    5.20
  17  20   0   11.20    6.60
  18 -20   0   21.30    8.90
  18 -20   0   -2.90    7.00
  18 -20   0   13.40    8.60
 -18 -20   0   22.30    7.70
  18  20   0   18.50   11.50
  18  20   0   16.30    6.50
  18  20   0   13.70    6.50
  19 -20   0    0.50    6.80
 -19 -20   0    6.70    7.40
  19 -20   0    7.10    7.10
  19 -20   0   10.60    7.20
  19  20   0   -4.00    6.50
  19  20   0    2.10    9.40
  19  20   0    5.00    5.80
   0 -21   0    4.90    4.80
   0 -21   0    6.40    5.70
   0 -21   0    6.10    3.70
   0 -21   0    5.80    4.50
   0 -21   0    6.10    3.30
   0  21   0    3.30    4.00
   0  21   0    1.00    5.00
   0  21   0    2.00    3.50
   0  21   0   -2.00    1.80
   0  21   0   13.30    7.00
   0  21   0    3.70    5.80
   0  21   0   19.70    6.20
   1 -21   0   20.70    5.70
  -1 -21   0    9.40    3.80
  -1 -21   0    6.30    5.70
   1 -21   0   14.20    4.60
  -1 -21   0    7.80    5.90
   1 -21   0    8.00    5.80
   1 -21   0   10.30    5.90
   1 -21   0   16.80    4.50
  -1 -21   0   16.00    4.10
  -1  21   0   23.10    6.50
  -1  21   0    9.20    4.10
  -1  21   0   19.60    5.50
  -1  21   0   14.80    5.90
  -1  21   0   16.70    4.80
   1  21   0   12.10    6.60
  -1  21   0   21.70    7.60
   1  21   0   13.80    4.10
   1  21   0   10.60    6.10
   1  21   0    7.40    6.80
   1  21   0   14.30    5.40
  -1  21   0    8.90    5.60
   2 -21   0  146.39   13.70
   2 -21   0  132.29   11.30
  -2 -21   0  132.39   11.30
  -2 -21   0  135.99   13.30
   2 -21   0  152.28   14.00
  -2 -21   0  129.89   10.30
  -2 -21   0  152.08   14.10
   2 -21   0  124.19   13.20
   2  21   0  153.48   14.00
  -2  21   0  152.48   12.40
  -2  21   0  124.79   11.30
   2  21   0  162.98   14.80
  -2  21   0  140.89   11.80
  -2  21   0  152.68   12.90
  -2  21   0  160.18   14.60
   2  21   0  154.08   10.90
  -2  21   0  138.19   13.00
   2  21   0  154.28   13.40
   2  21   0  160.68   14.50
   3 -21   0    6.40    4.10
  -3 -21   0    7.70    6.00
   3 -21   0   10.00    6.00
  -3 -21   0    2.30    2.90
   3 -21   0    6.20    6.20
  -3 -21   0    8.40    3.30
  -3 -21   0   11.90    5.70
   3 -21   0    6.70    5.50
   3  21   0    9.50    6.30
  -3  21   0    2.10    4.00
   3  21   0    4.10    6.40
  -3  21   0   10.70    4.40
   3  21   0    8.80    6.90
   3  21   0    7.20    3.30
   3  21   0    6.00    4.50
  -3  21   0    4.90    5.30
  -3  21   0    9.70    6.40
  -3  21   0    3.50    4.00
  -3  21   0    4.60    4.50
  -4 -21   0   15.00    6.10
  -4 -21   0    7.30    3.00
   4 -21   0   14.30    6.40
   4 -21   0   14.80    6.00
   4 -21   0   20.80    6.60
  -4 -21   0    6.10    6.40
  -4 -21   0    3.10    2.90
   4 -21   0   10.20    4.80
   4  21   0   15.80    7.10
   4  21   0   11.40    6.90
  -4  21   0   15.30    5.40
  -4  21   0   21.60    6.30
  -4  21   0   17.50    5.40
   4  21   0   16.00    5.60
   4  21   0    3.40    5.70
  -4  21   0   13.60    7.30
  -4  21   0    4.30    4.30
   4  21   0   10.70    3.40
  -4  21   0   15.60    5.40
   5 -21   0   81.99   10.90
   5 -21   0   78.79    9.30
   5 -21   0   80.99   10.80
  -5 -21   0   72.69   10.70
  -5 -21   0   77.49    6.40
  -5 -21   0   54.09    8.60
  -5 -21   0   65.79    6.90
   5 -21   0   76.69   11.70
  -5  21   0   74.89    9.00
  -5  21   0   87.29   10.20
   5  21   0  104.99   13.20
  -5  21   0   63.59    8.40
  -5  21   0   95.49   12.90
  -5  21   0   72.79    9.60
   5  21   0   71.19   11.70
   5  21   0   98.29   11.60
  -6 -21   0   93.29    6.40
  -6 -21   0   71.69   11.00
   6 -21   0  101.19   13.00
   6 -21   0   79.39   10.90
   6 -21   0   89.09   11.20
  -6 -21   0   84.89    7.60
   6 -21   0   67.39    9.30
  -6  21   0   78.99    9.30
  -6  21   0   87.29    9.10
   6  21   0  122.19   14.40
   6  21   0   83.29   11.00
  -6  21   0   76.09    9.40
   7 -21   0   79.49   10.30
  -7 -21   0   48.00    7.70
   7 -21   0   46.00    9.20
   7 -21   0   64.29   10.70
  -7 -21   0   64.99   10.40
   7 -21   0   60.09    9.00
  -7 -21   0   56.59    6.40
  -7  21   0   44.30    7.40
   7  21   0   62.19   11.00
   7  21   0   98.59   13.00
  -7  21   0   66.29    8.10
   8 -21   0   27.60    7.00
  -8 -21   0   35.40    7.30
   8 -21   0   39.50   11.60
   8 -21   0   49.60   10.50
  -8 -21   0   32.50    5.30
  -8 -21   0   31.90    8.40
  -8  21   0   35.50    6.20
  -8  21   0   36.00    6.50
  -8  21   0   31.00    5.90
   8  21   0   22.00    7.50
   8  21   0   36.40    9.00
  -9 -21   0    0.10    3.30
   9 -21   0    3.90    5.50
   9 -21   0   -2.20    5.30
  -9 -21   0    0.60    4.10
  -9 -21   0   -0.70    6.30
  -9  21   0    5.20    4.10
   9  21   0    4.50    6.50
  -9  21   0    3.50    3.70
  -9  21   0   -1.60    3.70
   9  21   0   -1.30    5.60
 -10 -21   0   24.40    8.70
 -10 -21   0   31.90    6.50
  10 -21   0   38.60    8.30
 -10 -21   0   36.40    5.80
  10 -21   0   37.20    9.30
 -10  21   0   39.40    6.50
  10  21   0   32.60    8.90
 -10  21   0   32.20    6.00
  10  21   0   26.10    7.40
 -10  21   0   28.30    5.40
  11 -21   0  106.49   12.90
 -11 -21   0  103.49   11.10
  11 -21   0  151.98   16.60
 -11 -21   0  107.89   13.90
  11 -21   0  123.79   15.20
  11  21   0  100.29   14.60
  11  21   0  110.39   17.30
 -11  21   0  114.69   10.50
 -11  21   0  124.69    9.70
 -11  21   0  105.59   10.40
  12 -21   0   59.29   11.30
  12 -21   0   41.60    9.00
 -12 -21   0   34.50    6.50
 -12 -21   0   59.09   11.10
 -12 -21   0   60.79    8.10
 -12  21   0   51.09    6.40
  12  21   0   54.59   12.10
 -12  21   0   41.40    7.50
  12  21   0   49.40    9.60
 -12  21   0   53.79    7.50
  12  21   0   51.49    8.10
 -13 -21   0   50.29   11.00
  13 -21   0   24.60    8.30
  13 -21   0   37.00    9.10
  13 -21   0   27.20    9.00
 -13  21   0   23.00    6.00
  13  21   0   34.70   10.50
  13  21   0   28.30    8.00
 -13  21   0   26.10    6.60
  13  21   0   24.90    6.80
  14 -21   0  310.67   22.20
  14 -21   0  264.77   22.60
  14 -21   0  302.37   23.60
 -14 -21   0  268.77   21.80
 -14  21   0  278.47   18.30
  14  21   0  283.97   22.10
 -14  21   0  267.57   19.90
  14  21   0  282.07   19.80
  14  21   0  288.07   24.60
 -15 -21   0   68.29   11.50
  15 -21   0   70.39   13.10
  15 -21   0   57.79   11.50
  15 -21   0   67.79   11.80
 -15  21   0   50.99    7.70
  15  21   0   54.79   10.70
  15  21   0   79.69   10.60
  15  21   0   73.09   13.80
 -15  21   0   68.19   12.50
  16 -21   0  236.78   21.90
 -16 -21   0  266.87   21.60
  16 -21   0  279.87   21.80
  16 -21   0  252.07   22.40
  16  21   0  238.08   19.20
  16  21   0  273.67   20.90
  16  21   0  263.97   24.10
  17 -21   0  159.18   17.90
  17 -21   0  179.98   20.20
 -17 -21   0  194.68   18.00
  17 -21   0  149.69   17.00
  17  21   0  148.19   15.00
  17  21   0  196.78   21.00
  17  21   0  156.38   16.10
  18 -21   0  389.86   28.80
  18 -21   0  373.06   28.10
 -18 -21   0  380.76   27.60
  18  21   0  402.46   31.10
  18  21   0  389.06   27.00
  18  21   0  394.86   26.50
   0 -22   0  149.88   11.00
   0 -22   0  150.08   14.00
   0 -22   0   91.69   12.70
   0 -22   0  137.79   10.80
   0  22   0  146.39   13.30
   0  22   0  134.89   11.20
   0  22   0  150.88   13.80
   0  22   0  162.88   15.50
   0  22   0  150.98   14.60
   1 -22   0  256.17   16.50
   1 -22   0  262.37   19.40
  -1 -22   0  241.08   15.80
  -1 -22   0  235.98   19.20
   1 -22   0  224.48   18.60
  -1 -22   0  247.38   15.80
   1 -22   0  277.57   16.60
  -1 -22   0  261.17   19.10
  -1  22   0  293.37   20.90
  -1  22   0  244.08   16.80
  -1  22   0  252.37   18.70
   1  22   0  256.57   19.10
   1  22   0  271.37   20.20
  -1  22   0  270.37   20.40
   1  22   0  271.67   20.40
   1  22   0  245.28   16.30
  -1  22   0  245.68   18.40
   1  22   0  225.28   18.10
   2 -22   0  160.78   11.90
   2 -22   0  168.28   15.00
   2 -22   0  131.99   13.80
   2 -22   0  147.39   11.90
  -2 -22   0  134.59   10.60
  -2 -22   0  153.38   14.20
  -2 -22   0  151.98   10.90
  -2 -22   0  137.99   14.70
   2  22   0  164.38   11.60
  -2  22   0  149.09   14.00
  -2  22   0  166.58   13.60
   2  22   0  138.09   15.10
  -2  22   0  139.99   14.70
   2  22   0  169.18   15.60
   2  22   0  145.79   14.50
  -2  22   0  152.18   12.40
   3 -22   0   26.20    5.90
  -3 -22   0   22.10    4.50
  -3 -22   0   29.90    7.20
   3 -22   0   28.30    7.80
   3 -22   0   30.10    7.40
  -3 -22   0   25.70    8.00
  -3 -22   0   28.30    4.90
  -3  22   0   27.60    6.50
   3  22   0   25.90    8.10
  -3  22   0   26.90    8.90
   3  22   0   34.30    8.90
   3  22   0   22.20    6.20
   3  22   0   34.10    8.20
  -3  22   0   25.90    6.50
   3  22   0   26.10    4.80
  -4 -22   0  300.87   18.30
  -4 -22   0  321.87   21.80
  -4 -22   0  326.67   22.60
   4 -22   0  307.67   22.50
  -4 -22   0  291.87   17.60
   4 -22   0  287.47   19.70
   4 -22   0  317.27   22.00
   4  22   0  325.57   18.40
   4  22   0  311.67   21.70
  -4  22   0  315.87   20.60
   4  22   0  309.47   22.80
   4  22   0  301.17   22.60
   4  22   0  316.37   23.10
  -4  22   0  317.47   23.20
  -4  22   0  320.67   20.50
  -5 -22   0  153.68   13.90
  -5 -22   0  153.18   14.80
  -5 -22   0  141.29    9.50
   5 -22   0  133.79   14.60
   5 -22   0  139.39   14.00
  -5 -22   0  132.89   10.20
   5 -22   0  162.98   13.00
   5  22   0  156.68   15.10
   5  22   0  151.08   15.20
  -5  22   0  128.89   11.90
   5  22   0  145.89   13.80
  -5  22   0  139.89   16.10
  -6 -22   0   60.49    5.60
  -6 -22   0   57.59    8.70
   6 -22   0   78.39    9.80
  -6 -22   0   66.89    6.90
  -6 -22   0   46.50    9.90
   6 -22   0   71.39   10.70
   6 -22   0   81.59   10.80
   6  22   0   72.29   11.30
   6  22   0   85.59   11.90
  -6  22   0   57.29    8.10
  -7 -22   0  124.49   12.60
  -7 -22   0  130.59    9.90
   7 -22   0  133.29   14.80
   7 -22   0  131.29   12.40
  -7 -22   0  128.19   14.40
   7  22   0  163.68   15.80
   7  22   0  136.99   14.80
  -7  22   0  114.19   10.80
  -8 -22   0   41.10    9.50
   8 -22   0   45.60    8.50
   8 -22   0   49.40    9.50
  -8 -22   0   45.60    6.00
  -8 -22   0   44.30    9.50
   8  22   0   43.10    9.90
   8  22   0   32.70    8.10
  -8  22   0   46.50    6.60
  -8  22   0   28.20    6.00
  -9 -22   0    5.30    5.10
  -9 -22   0   -0.60    3.10
   9 -22   0   -2.00    5.20
   9 -22   0   12.50    7.20
  -9 -22   0   10.20    7.10
   9  22   0    2.60    6.10
  -9  22   0   -6.30    3.60
  -9  22   0    3.60    3.50
   9  22   0    1.60    6.40
  -9  22   0    5.70    5.80
 -10 -22   0    6.20    7.10
  10 -22   0   -0.30    5.90
  10 -22   0   -1.00    5.60
 -10 -22   0    4.80    3.70
 -10 -22   0   -1.70    4.40
 -10  22   0   -7.60    3.90
 -10  22   0    2.60    3.80
  10  22   0   -5.60    7.80
  10  22   0    1.10    6.60
 -11 -22   0   48.70    8.10
  11 -22   0   30.60    8.00
  11 -22   0   44.10   10.50
 -11 -22   0   36.00    6.50
  11 -22   0   29.40    9.50
 -11  22   0   33.70    6.40
 -11  22   0   25.20    5.80
  11  22   0   42.30    9.40
  11  22   0   34.60   10.00
 -11  22   0   44.60    6.30
 -12 -22   0  121.19   14.90
  12 -22   0  124.39   15.20
  12 -22   0  143.29   16.00
 -12 -22   0  101.09   10.10
  12 -22   0   86.69   12.40
 -12 -22   0   99.19   10.80
  12  22   0  112.89   15.70
 -12  22   0  101.69    8.60
  12  22   0   94.89   13.50
 -12  22   0  104.79   10.50
 -12  22   0   76.19    9.70
  13 -22   0   17.20    8.30
  13 -22   0   20.00    8.00
 -13 -22   0   11.60    7.30
  13 -22   0   12.40    7.60
 -13  22   0    4.50    4.80
  13  22   0   16.70    7.00
 -13  22   0    3.60    4.90
  13  22   0   11.90    9.30
  13  22   0    3.00    5.40
 -14 -22   0  135.09   15.40
  14 -22   0   94.49   14.80
  14 -22   0  167.08   17.20
  14 -22   0  147.39   15.30
 -14  22   0  104.49   11.70
  14  22   0  183.48   20.10
  14  22   0  137.29   13.20
  14  22   0  128.29   15.00
 -14  22   0  119.29   11.90
 -15 -22   0   10.00    7.60
  15 -22   0   25.20    8.90
  15 -22   0   21.90    9.00
  15 -22   0   26.80    9.00
  15  22   0   17.00    6.50
  15  22   0   29.20   10.00
  15  22   0   15.50    7.90
  16 -22   0   96.79   13.30
 -16 -22   0   85.99   13.10
  16 -22   0   99.09   14.70
  16 -22   0   93.09   13.80
  16  22   0   94.69   13.40
  16  22   0  124.09   15.30
  16  22   0  102.89   15.60
 -17 -22   0   34.30    8.50
  17 -22   0   21.10    9.70
  17  22   0   17.40    7.50
  17  22   0    8.50    6.20
 -18 -22   0  114.19   15.10
  18 -22   0  110.49   15.10
  18 -22   0   88.79   13.90
  18 -22   0  147.59   18.10
  18  22   0  155.48   14.60
  18  22   0  135.59   19.00
   0 -23   0   -2.70    4.60
   0 -23   0    0.50    6.20
   0 -23   0    3.60    3.30
   0 -23   0    6.90    4.00
   0  23   0   -3.00    5.00
   0  23   0   -2.60    3.30
   0  23   0    2.30    5.40
   0  23   0   -1.10    4.40
   0  23   0    2.60    6.20
   1 -23   0   23.90    7.20
  -1 -23   0   38.10    5.60
   1 -23   0   31.90    5.70
  -1 -23   0   31.40    8.30
   1 -23   0   16.70    5.00
   1 -23   0   13.70    6.90
  -1 -23   0   28.00    7.70
  -1 -23   0   14.40    4.60
  -1  23   0   15.30    7.50
   1  23   0   28.10    5.50
   1  23   0   41.20    9.30
   1  23   0   26.00    7.40
   1  23   0   24.90    6.70
  -1  23   0   21.10    5.60
  -1  23   0   24.90    7.50
  -1  23   0   35.20    8.70
   1  23   0   19.90    8.30
   2 -23   0  122.69   13.80
  -2 -23   0   89.39   12.70
  -2 -23   0  119.99   13.30
   2 -23   0  129.69   10.80
  -2 -23   0  107.09    9.10
   2 -23   0  127.99   13.80
  -2 -23   0  116.59    9.60
   2 -23   0  114.19   10.40
   2  23   0  114.89   12.40
  -2  23   0  115.69   10.90
   2  23   0  106.19    9.90
   2  23   0  144.09   15.20
   2  23   0  149.99   15.80
  -2  23   0  126.39   13.90
  -2  23   0  111.39   12.10
   2  23   0  136.39   13.60
  -3 -23   0   96.39    8.80
  -3 -23   0  107.59   12.60
   3 -23   0  123.79   13.70
  -3 -23   0  117.49    9.40
  -3 -23   0  115.49   14.00
   3 -23   0  111.79   10.80
   3 -23   0  126.39   13.60
   3  23   0  115.09   14.30
  -3  23   0  110.89   11.10
   3  23   0  108.59   12.20
  -3  23   0  104.49   11.60
  -3  23   0  130.39   14.40
   3  23   0  124.09   14.30
   3  23   0  117.49    9.50
   3  23   0  130.09   13.90
  -4 -23   0   95.69    8.40
  -4 -23   0  112.79   13.00
  -4 -23   0   92.79   12.80
  -4 -23   0   85.49    7.70
   4 -23   0  102.79   10.60
   4 -23   0   84.79   12.00
   4 -23   0   95.59   12.20
   4  23   0  120.19   13.70
   4  23   0  113.49   14.10
   4  23   0  126.69   14.80
  -4  23   0   80.09   10.30
  -4  23   0  103.19   13.80
   4  23   0   98.09   13.30
  -5 -23   0   70.09   10.10
   5 -23   0   99.79   10.80
  -5 -23   0   94.59    8.10
  -5 -23   0   85.69    7.30
  -5 -23   0  116.09   14.40
   5 -23   0   90.59   12.00
   5 -23   0   81.89   11.90
  -5  23   0   79.09   12.50
   5  23   0  121.29   13.60
   5  23   0   96.99   13.40
  -5  23   0   68.49    9.30
   5  23   0  108.99   14.10
  -6 -23   0  137.99   13.40
  -6 -23   0  119.09    8.50
   6 -23   0  121.69   13.50
   6 -23   0  127.79   12.40
  -6 -23   0  150.68   15.20
   6 -23   0  126.09   14.70
  -6 -23   0  123.69   10.00
  -6  23   0  139.79   11.60
   6  23   0  137.69   15.40
   6  23   0  143.09   15.30
   7 -23   0    2.30    5.60
  -7 -23   0   14.10    6.40
  -7 -23   0    9.50    7.00
   7 -23   0   11.60    6.80
  -7 -23   0   10.60    4.00
   7  23   0   24.20    8.30
  -7  23   0    5.20    4.10
   7  23   0   13.90    8.20
  -8 -23   0  147.09   11.30
  -8 -23   0  136.19   13.50
   8 -23   0  136.59   15.70
  -8 -23   0  147.19   16.10
   8 -23   0  152.88   14.10
  -8  23   0  139.49   11.60
   8  23   0  176.08   16.90
   8  23   0  178.08   18.80
  -9 -23   0   -4.40    3.50
  -9 -23   0   -2.80    7.70
   9 -23   0   -1.80    6.30
  -9 -23   0   11.60   10.20
   9 -23   0   -5.90    5.60
   9  23   0    1.00    5.50
   9  23   0    4.40    7.80
  -9  23   0   -0.70    3.50
 -10 -23   0  316.77   24.50
  10 -23   0  339.17   22.90
  10 -23   0  297.37   24.10
 -10 -23   0  312.97   21.80
 -10  23   0  340.87   19.80
  10  23   0  330.77   25.00
  10  23   0  306.27   24.10
 -11 -23   0    0.10    6.90
  11 -23   0   -5.50    6.70
 -11 -23   0    8.40    4.70
  11 -23   0    9.20    6.60
 -11 -23   0    4.30    4.70
  11 -23   0   -0.50    7.00
  11  23   0   12.50    7.70
  11  23   0    4.90    6.60
  12 -23   0   69.89   11.10
  12 -23   0   75.29   12.50
 -12 -23   0   75.89   12.20
  12 -23   0   88.99   13.60
  12  23   0   57.49   12.50
 -12  23   0   80.19    8.20
  12  23   0   77.99   12.40
  13 -23   0   75.79   13.10
 -13 -23   0   67.99   12.20
  13 -23   0   69.59   12.10
  13 -23   0   83.99   13.20
  13  23   0   73.59   13.70
  13  23   0   54.19   10.40
  14 -23   0   -5.70    5.90
 -14 -23   0   -3.60    2.20
  14 -23   0    3.10    7.20
  14 -23   0   -0.70    7.40
 -14 -23   0    1.60    7.00
  14  23   0    2.90    6.00
  14  23   0    3.10    8.50
  15 -23   0   94.39   13.40
  15 -23   0   80.29   14.00
 -15 -23   0   56.49   11.30
  15 -23   0   82.89   13.90
  15  23   0   61.79   10.00
  15  23   0   65.09   11.70
  15  23   0   62.69   12.70
  16 -23   0   10.80    8.90
  16 -23   0    6.80    8.40
  16 -23   0    4.90    7.20
 -16 -23   0   -2.70    6.10
  16  23   0   13.20    6.60
  16  23   0   -1.20    8.70
  16  23   0   14.80    6.90
  17 -23   0  172.48   19.50
 -17 -23   0  226.98   19.60
  17 -23   0  173.98   17.90
  17  23   0  196.18   16.70
  17  23   0  158.38   18.30
  17  23   0  228.38   22.40
   0 -24   0  290.37   20.90
   0 -24   0  242.48   16.60
   0 -24   0  262.27   17.00
   0 -24   0  242.98   20.10
   0  24   0  274.67   21.20
   0  24   0  282.67   20.20
   0  24   0  269.47   21.70
   0  24   0  238.48   18.70
  -1 -24   0  153.78   11.90
  -1 -24   0  163.18   15.30
   1 -24   0  134.99   15.40
   1 -24   0  162.58   12.30
   1 -24   0  152.68   12.40
  -1 -24   0  150.28   11.60
   1 -24   0  171.98   16.20
  -1 -24   0  150.48   15.80
   1  24   0  165.58   16.70
  -1  24   0  147.89   12.70
  -1  24   0  189.18   17.40
   1  24   0  179.98   16.10
   1  24   0  165.38   12.60
  -1  24   0  162.88   16.20
   1  24   0  155.88   16.00
  -1  24   0  158.98   14.80
   2 -24   0  776.82   45.30
   2 -24   0  715.73   44.70
  -2 -24   0  799.82   41.40
  -2 -24   0  761.52   41.00
  -2 -24   0  785.12   45.60
   2 -24   0  745.53   42.50
  -2 -24   0  812.12   45.00
   2 -24   0  806.82   42.30
  -2  24   0  793.12   44.00
   2  24   0  840.32   45.80
  -2  24   0  785.72   46.00
   2  24   0  792.72   46.20
   2  24   0  777.62   45.10
   2  24   0  730.83   41.70
  -2  24   0  750.72   42.90
   2  24   0  827.62   46.40
  -3 -24   0    7.70    3.80
  -3 -24   0    7.90    5.70
  -3 -24   0    1.80    6.60
   3 -24   0   11.50    4.20
   3 -24   0    9.00    5.10
   3 -24   0    4.00    6.00
   3 -24   0    2.90    6.00
  -3 -24   0   10.00    3.80
  -3  24   0    7.70    5.20
   3  24   0   11.60    3.70
  -3  24   0    3.90    6.70
   3  24   0    4.70    5.30
   3  24   0   10.00    7.00
   3  24   0    1.80    6.40
   3  24   0   -3.00    5.80
  -4 -24   0  545.45   29.50
  -4 -24   0  521.15   34.00
   4 -24   0  520.65   33.80
   4 -24   0  534.95   31.10
  -4 -24   0  517.75   29.40
  -4 -24   0  579.44   33.40
   4 -24   0  564.34   33.80
  -4  24   0  508.35   31.40
   4  24   0  562.44   34.70
  -4  24   0  513.05   34.50
   4  24   0  546.65   34.30
   4  24   0  539.75   34.50
   4  24   0  516.45   33.00
  -5 -24   0    6.00    3.40
  -5 -24   0    5.20    7.00
  -5 -24   0    5.70    2.90
  -5 -24   0    9.60    5.80
   5 -24   0    9.70    5.40
   5 -24   0    8.20    7.00
   5 -24   0   10.00    6.60
   5  24   0   10.30    7.80
   5  24   0   13.00    7.20
   5  24   0    8.40    5.90
  -5  24   0    5.00    4.80
   5  24   0   16.50    7.60
  -5  24   0    3.00    7.10
  -6 -24   0  283.07   16.00
   6 -24   0  280.87   22.30
  -6 -24   0  275.77   22.30
   6 -24   0  273.97   21.20
   6 -24   0  275.77   19.60
  -6 -24   0  278.67   17.50
  -6 -24   0  291.87   20.80
   6  24   0  318.47   23.60
   6  24   0  277.97   22.30
   6  24   0  292.47   22.60
  -6  24   0  284.17   18.90
   7 -24   0    6.70    6.80
  -7 -24   0   -3.00    5.30
  -7 -24   0   -4.00    2.90
   7 -24   0    2.80    5.50
  -7 -24   0    2.60    7.00
   7  24   0    8.60   10.80
  -7  24   0   11.00    4.80
  -8 -24   0   86.89   11.00
  -8 -24   0   94.49   13.40
   8 -24   0   87.29   17.50
  -8 -24   0  102.39    9.10
   8 -24   0  100.69   13.80
  -8  24   0   82.79    9.30
   8  24   0  122.69   15.30
   8  24   0   88.59   12.50
  -9 -24   0   48.80   10.40
  -9 -24   0   47.60    8.60
   9 -24   0   44.50    9.10
   9 -24   0   34.20    9.40
   9  24   0   64.39   12.70
   9  24   0   57.99   11.70
  -9  24   0   55.39    7.30
 -10 -24   0    8.80    5.30
 -10 -24   0   12.10    4.70
 -10 -24   0   17.60    8.40
  10 -24   0    7.90    7.90
  10 -24   0    8.30    6.50
  10  24   0    8.40    7.80
 -10  24   0   14.00    4.40
  10  24   0    0.90    6.60
 -11 -24   0  125.09   15.90
  11 -24   0  118.29   15.60
  11 -24   0  123.09   14.60
 -11 -24   0  118.19   12.40
  11 -24   0  124.89   15.70
 -11 -24   0   94.39   10.50
 -11  24   0  125.09    9.80
  11  24   0  136.89   17.40
  11  24   0   88.99   12.90
  12 -24   0   50.69   11.60
  12 -24   0   43.50   10.70
 -12 -24   0   36.60   10.30
  12 -24   0   47.00   10.20
  12  24   0   52.99   12.60
  12  24   0   39.50    9.60
 -13 -24   0    0.00    7.30
  13 -24   0   12.10    8.20
  13 -24   0    8.20    7.60
  13 -24   0    3.80    6.80
 -13 -24   0   -3.50    2.10
  13  24   0   23.20    9.40
  13  24   0    0.20    6.10
 -14 -24   0   62.19   12.30
  14 -24   0   47.30   10.70
  14 -24   0   63.69   12.00
  14 -24   0   80.89   13.80
  14  24   0   63.59   13.30
  14  24   0   65.09   11.10
  15 -24   0   -1.60    7.30
 -15 -24   0   -6.30    3.80
 -15 -24   0   13.70    7.40
  15 -24   0    5.10    8.10
  15 -24   0   13.40    8.70
  15  24   0   -5.90    7.40
  15  24   0   11.50    6.90
  16 -24   0  335.97   24.60
  16 -24   0  308.67   25.40
 -16 -24   0  303.57   24.50
  16 -24   0  311.97   25.80
  16  24   0  292.97   24.00
  16  24   0  335.17   27.50
   0 -25   0    4.50    3.70
   0 -25   0   -1.20    6.90
   0 -25   0   -0.90    6.40
   0 -25   0    3.60    4.00
   0  25   0   -1.50    6.30
   0  25   0    8.90    4.50
   0  25   0    2.60    7.30
   0  25   0   -1.10    5.60
  -1 -25   0   13.50    4.50
   1 -25   0    1.40    6.50
   1 -25   0   31.00    8.70
  -1 -25   0   13.60    7.60
  -1 -25   0    7.80    7.10
  -1 -25   0    7.70    4.50
   1 -25   0   10.00    5.00
  -1  25   0   23.10    7.50
   1  25   0   13.20    7.80
   1  25   0   14.10    7.40
   1  25   0   12.70    7.60
  -1  25   0   24.20    9.10
  -1  25   0   11.50    4.90
  -2 -25   0   24.70    8.40
  -2 -25   0   44.50    8.70
   2 -25   0   50.29    7.90
   2 -25   0   57.29    7.80
  -2 -25   0   52.09    6.50
   2 -25   0   37.40    9.10
  -2 -25   0   39.20    6.00
   2 -25   0   58.29   10.30
  -2  25   0   44.30   10.20
  -2  25   0   49.00    8.60
   2  25   0   50.99    7.10
   2  25   0   33.90    9.10
   2  25   0   37.10    9.90
   2  25   0   42.90   10.20
   3 -25   0   -0.40    4.70
  -3 -25   0    0.30    3.30
  -3 -25   0   -4.00    5.50
  -3 -25   0    1.50    7.30
   3 -25   0    5.30    4.40
   3 -25   0    1.10    6.10
   3 -25   0    5.10    6.70
  -3 -25   0    4.60    3.40
  -3  25   0    6.20    7.00
   3  25   0    0.80    6.20
   3  25   0   10.60    4.00
  -3  25   0    1.10    5.20
   3  25   0    2.90    6.60
   3  25   0    0.90    6.60
  -4 -25   0   77.29   12.10
  -4 -25   0   58.29    6.70
  -4 -25   0   53.19    9.50
   4 -25   0   48.60   10.40
   4 -25   0   61.49    9.00
  -4 -25   0   64.69    7.40
   4 -25   0   48.70   10.20
   4  25   0   77.09   12.80
  -4  25   0   66.99   12.00
   4  25   0   64.59   11.90
  -4  25   0   63.79    9.60
   4  25   0   48.80   11.60
   5 -25   0  139.59   16.50
  -5 -25   0  132.99   14.00
  -5 -25   0  123.79   10.20
   5 -25   0  115.49   14.40
   5 -25   0  107.39   12.00
  -5 -25   0  136.69    9.40
   5  25   0  118.59   16.70
  -5  25   0  132.09   12.10
   5  25   0  129.99   16.10
  -6 -25   0  237.88   18.60
  -6 -25   0  223.88   13.30
   6 -25   0  241.98   19.20
   6 -25   0  219.08   19.80
  -6 -25   0  230.98   14.90
   6 -25   0  198.18   17.00
  -6 -25   0  201.88   19.00
   6  25   0  235.58   20.30
  -6  25   0  222.88   16.40
   6  25   0  210.88   20.00
   6  25   0  245.08   20.30
  -7 -25   0   40.20    8.50
  -7 -25   0   50.09   10.60
   7 -25   0   40.40   10.70
  -7 -25   0   35.20    5.90
   7  25   0   52.69   10.30
  -7  25   0   39.40    6.80
   7  25   0   42.80   10.20
   7  25   0   38.10   11.60
  -8 -25   0   76.89    9.60
   8 -25   0   77.69   13.30
   8 -25   0   82.39   11.30
  -8 -25   0   71.79   10.30
  -8 -25   0   87.59   13.10
  -8  25   0   73.29    8.90
   8  25   0  116.09   15.50
   8  25   0   89.09   14.00
  -9 -25   0   37.90   10.10
   9 -25   0   28.60   10.10
   9 -25   0   27.40    8.00
  -9 -25   0   22.10    6.60
  -9 -25   0   44.20    6.70
  -9  25   0   24.80    5.50
   9  25   0   36.30   11.00
   9  25   0   37.30    9.10
  10 -25   0   82.19   12.10
  10 -25   0   87.09   13.20
 -10 -25   0   82.99    9.40
 -10 -25   0   82.09   13.50
  10 -25   0   68.99   13.00
 -10 -25   0   93.09   11.50
  10  25   0  108.69   16.10
 -10  25   0   82.59    8.40
  10  25   0   76.19   13.10
  11 -25   0    5.90    7.10
  11 -25   0   15.30    7.60
 -11 -25   0   -1.00    2.70
 -11 -25   0    4.60    7.80
  11 -25   0   11.40    7.70
 -11  25   0    4.80    3.70
  11  25   0    4.20    7.20
  11  25   0    1.50    7.90
  12 -25   0   17.40    8.70
  12 -25   0    4.50    6.70
  12 -25   0   16.00    8.80
 -12 -25   0   18.50    9.40
  12  25   0   11.50    7.50
  12  25   0    8.30    8.70
 -13 -25   0   32.40    9.60
  13 -25   0   29.00    8.40
  13 -25   0   39.60    9.50
  13 -25   0   48.90   11.30
  13  25   0   19.50    9.40
  13  25   0   22.70    8.80
  14 -25   0    3.90    7.30
 -14 -25   0   -4.70    3.60
  14 -25   0    3.10    6.30
 -14 -25   0    0.70    5.80
  14 -25   0   -8.50    6.90
  14  25   0   -9.00    5.50
  14  25   0    2.50    7.90
  15 -25   0   26.90   14.20
  15 -25   0   -0.70    6.40
 -15 -25   0    7.00    7.10
  15 -25   0   -2.00    9.00
  15  25   0   -1.30    6.40
  16 -25   0   18.80    8.60
  16 -25   0    5.20    7.40
  16 -25   0   17.70    9.60
 -16 -25   0    6.50    7.90
  16  25   0    9.40    7.20
  16  25   0   10.60    9.80
   0 -26   0   90.79    9.70
   0 -26   0   88.99   12.20
   0 -26   0   92.29    9.00
   0 -26   0   72.19   12.20
   0  26   0   73.29   12.40
   0  26   0   91.39   13.00
   0  26   0   86.59    9.70
  -1 -26   0   60.09    8.80
   1 -26   0   36.10    9.70
   1 -26   0   27.40    6.60
  -1 -26   0   38.70   11.40
  -1 -26   0   33.90    6.10
   1 -26   0   44.30    9.40
   1 -26   0   44.00    6.70
  -1 -26   0   40.20    9.40
   1  26   0   50.19   10.90
   1  26   0   49.10    7.30
  -1  26   0   52.39   10.00
   1  26   0   55.39   10.80
   2 -26   0   67.59   11.40
   2 -26   0   87.89    9.40
  -2 -26   0  111.69   14.40
   2 -26   0   91.09   10.50
  -2 -26   0   80.29    8.50
   2 -26   0  107.39   13.80
  -2 -26   0   71.09    8.30
   2  26   0   80.69   10.60
   2  26   0   73.69   15.30
   2  26   0   96.79   14.00
  -2  26   0  100.29   12.80
  -3 -26   0  224.98   18.80
   3 -26   0  204.98   16.00
  -3 -26   0  217.58   14.60
  -3 -26   0  220.78   14.30
  -3 -26   0  214.48   19.60
   3 -26   0  232.58   20.10
   3 -26   0  192.88   18.70
  -3  26   0  223.38   20.40
   3  26   0  220.18   19.80
   3  26   0  208.38   19.70
   3  26   0  232.38   21.10
  -3  26   0  190.18   17.00
  -4 -26   0  281.87   17.10
  -4 -26   0  293.37   21.60
   4 -26   0  280.97   22.30
   4 -26   0  301.77   23.30
  -4 -26   0  257.07   17.50
   4 -26   0  258.77   19.20
  -4 -26   0  297.67   22.90
   4  26   0  284.77   22.80
  -4  26   0  280.77   23.30
  -4  26   0  282.67   20.00
   4  26   0  279.77   23.40
   4  26   0  298.77   23.50
   5 -26   0  173.78   15.30
   5 -26   0  193.78   20.00
   5 -26   0  179.48   17.40
  -5 -26   0  185.78   16.70
  -5 -26   0  172.58   11.90
  -5 -26   0  184.58   12.80
  -5 -26   0  188.38   18.60
  -5  26   0  178.48   19.10
  -5  26   0  170.68   14.90
   5  26   0  182.38   18.40
   5  26   0  185.18   18.80
   5  26   0  188.78   18.60
  -6 -26   0   90.99   13.50
  -6 -26   0   85.99   12.00
   6 -26   0  116.89   14.40
  -6 -26   0   95.79    9.00
   6 -26   0  100.69   14.40
   6 -26   0   96.89   17.90
   6  26   0  100.49   14.70
  -6  26   0   99.59   10.70
   6  26   0  103.09   15.30
   6  26   0  114.19   15.10
  -7 -26   0  115.49   13.60
  -7 -26   0  103.29   15.00
   7 -26   0  124.19   15.50
   7 -26   0  121.39   13.30
   7  26   0  137.39   17.90
   7  26   0  146.99   17.70
   7  26   0  123.59   16.60
  -7  26   0  133.99   11.70
  -8 -26   0    2.80    4.00
  -8 -26   0  -10.80    4.40
   8 -26   0   -3.30    6.20
   8 -26   0   -3.10    6.00
  -8 -26   0   -3.10    7.00
   8  26   0   17.40    9.60
  -8  26   0    2.00    4.30
   8  26   0    8.80    8.40
   8  26   0   -5.10    6.70
  -9 -26   0  292.67   19.20
   9 -26   0  287.77   21.80
   9 -26   0  287.27   24.20
  -9 -26   0  295.67   21.70
  -9 -26   0  301.17   24.30
   9  26   0  301.37   24.50
   9  26   0  330.47   25.80
   9  26   0  273.37   24.50
  -9  26   0  295.27   19.00
  10 -26   0  136.99   14.90
 -10 -26   0  127.79   16.80
 -10 -26   0   95.89   10.70
  10 -26   0  133.99   16.90
 -10 -26   0  136.89   13.80
  10 -26   0  120.89   15.10
 -10  26   0  127.69   10.70
  10  26   0  113.39   15.20
  10  26   0  127.99   16.90
  11 -26   0   19.60    9.10
  11 -26   0   38.20   11.40
 -11 -26   0   23.80    9.40
  11 -26   0   20.30    8.50
  11  26   0   21.90    9.90
  11  26   0   25.90    9.10
  12 -26   0   93.09   14.60
 -12 -26   0   73.79   13.60
  12 -26   0  103.39   14.60
  12 -26   0  102.79   13.60
  12  26   0  119.39   16.50
  12  26   0   98.79   15.80
  13 -26   0    2.80    7.90
  13 -26   0   -2.40    7.10
 -13 -26   0    5.50    6.90
  13 -26   0   17.10    8.20
 -13 -26   0   -4.20    3.40
  13  26   0   -1.30    7.00
  13  26   0   12.20    7.90
 -14 -26   0   -7.40    6.40
  14 -26   0   -2.80    6.90
 -14 -26   0    0.20    6.50
  14  26   0   -1.70    5.80
  15 -26   0   19.70   10.40
  15 -26   0   10.00    8.20
  15 -26   0    8.80    9.20
 -15 -26   0   23.00    8.60
  15  26   0   19.00    8.90
  15  26   0   15.80   10.40
   0 -27   0    0.80    6.80
   0 -27   0    3.60    7.10
   0 -27   0    1.50    4.30
   0 -27   0    2.90    3.90
   0  27   0    2.70    7.90
   0  27   0    2.10    6.30
  -1 -27   0  321.47   24.00
  -1 -27   0  295.67   22.80
  -1 -27   0  301.47   18.60
   1 -27   0  251.87   22.40
   1 -27   0  272.27   23.00
  -1 -27   0  288.37   18.30
   1 -27   0  282.07   19.10
   1 -27   0  287.27   18.80
  -1  27   0  323.67   22.50
  -1  27   0  302.67   24.30
   1  27   0  271.57   19.00
   1  27   0  320.17   24.50
   1  27   0  245.08   22.70
   1  27   0  265.47   22.10
   2 -27   0   68.19   12.80
   2 -27   0   78.89    9.80
  -2 -27   0   71.49   12.40
   2 -27   0   57.29   11.70
  -2 -27   0   57.69    7.50
  -2 -27   0   62.59    7.70
  -2 -27   0   74.19   12.30
   2  27   0   79.99    9.10
   2  27   0   88.09   13.30
   2  27   0   62.79   12.60
  -2  27   0   64.09   12.10
   2  27   0   61.79   12.40
  -2  27   0   79.69   11.30
  -3 -27   0   60.29   10.80
  -3 -27   0   74.09    8.20
   3 -27   0   65.59    9.50
   3 -27   0   88.19   13.40
   3 -27   0   61.09   12.30
  -3 -27   0   67.59   10.20
  -3 -27   0   80.09   13.30
  -3  27   0   75.59   13.90
   3  27   0   76.29   13.00
   3  27   0   82.09   14.20
   3  27   0   90.09   13.70
  -3  27   0   90.49   12.20
  -4 -27   0  113.99   16.30
  -4 -27   0  148.39   15.70
   4 -27   0  132.39   18.40
  -4 -27   0  142.69   10.70
   4 -27   0  138.29   13.40
   4  27   0  170.78   19.50
  -4  27   0  142.69   18.10
   4  27   0  158.88   17.10
  -4  27   0  133.19   13.80
   4  27   0  141.29   25.30
  -5 -27   0    5.90    6.80
   5 -27   0    1.20    9.70
   5 -27   0    7.40    7.50
  -5 -27   0   -2.50    4.50
  -5 -27   0    7.70    7.50
   5 -27   0    1.00    7.40
   5  27   0    9.20    8.30
   5  27   0   13.70    8.80
   5  27   0   10.20    7.40
  -5  27   0   27.60    6.50
  -5  27   0   -3.60    6.60
   6 -27   0    2.30    6.80
   6 -27   0   -4.00    5.30
  -6 -27   0   -4.90    4.70
  -6 -27   0   -0.20    3.90
  -6 -27   0   -6.60    6.30
   6 -27   0   -3.50    7.20
   6  27   0    3.10    7.30
   6  27   0    0.40    7.50
  -6  27   0    6.90    5.00
   6  27   0    2.20    7.80
  -7 -27   0    8.10    7.10
  -7 -27   0   11.50    5.00
   7 -27   0    4.60    7.10
  -7 -27   0    2.10    7.10
   7 -27   0   10.50    6.20
   7  27   0    6.60    7.10
   7  27   0   14.10    8.40
  -7  27   0   -0.50    4.00
   7  27   0   13.30    8.70
  -8 -27   0    9.60    5.10
  -8 -27   0   11.20    6.40
   8 -27   0    1.90    7.00
   8 -27   0    1.90    6.20
  -8 -27   0   10.70    9.10
   8  27   0   11.60    8.00
   8  27   0   13.70    7.50
  -8  27   0    7.70    4.30
   8  27   0   22.70    9.50
  -9 -27   0   15.50    6.80
  -9 -27   0   21.20    9.10
  -9 -27   0    3.70    5.10
   9 -27   0   10.10    7.00
   9 -27   0   11.20    8.20
   9  27   0    7.70    8.50
   9  27   0   13.90    8.10
   9  27   0   13.80    9.30
  -9  27   0   13.90    5.20
  10 -27   0   71.49   12.30
  10 -27   0   71.59   11.50
  10 -27   0   70.29   12.30
 -10 -27   0   78.89   13.60
  10  27   0  104.59   15.60
  10  27   0   89.69   14.70
  10  27   0   86.79   14.30
  11 -27   0    2.00    8.20
 -11 -27   0   14.70    8.90
  11 -27   0   22.70    9.00
  11 -27   0   11.00    8.20
  11  27   0   20.50    9.90
  11  27   0   21.20    8.90
  11  27   0   18.50   10.00
  12 -27   0   27.20    9.00
  12 -27   0   24.60    9.30
 -12 -27   0   16.40    8.80
  12 -27   0   35.70   10.60
  12  27   0   24.50   10.20
  12  27   0    5.10    7.20
 -13 -27   0  -11.60    4.00
  13 -27   0   19.40   13.20
  13 -27   0    1.10    9.50
  13 -27   0    4.30    7.40
 -13 -27   0   -8.10    7.20
  13  27   0   15.30    8.60
  13  27   0   17.60   16.20
  14 -27   0   -1.70    7.00
  14 -27   0    2.90    6.60
  14 -27   0    2.50    7.70
 -14 -27   0  -14.80    6.10
  14  27   0   -2.90    8.70
  14  27   0   -6.30    6.70
   0 -28   0  531.85   34.80
   0 -28   0  516.35   34.80
   0 -28   0  515.45   30.20
   0  28   0  525.75   34.00
   0  28   0  553.74   36.20
  -1 -28   0    2.80    7.20
  -1 -28   0    2.40    4.00
   1 -28   0    2.50    4.60
   1 -28   0   10.70    7.50
   1 -28   0   -2.10    6.20
  -1 -28   0   -1.20    7.10
  -1 -28   0    8.50    4.90
   1  28   0    3.60    8.60
  -1  28   0    7.10    7.40
   1  28   0    2.50    8.10
   1  28   0   -6.10    6.50
  -1  28   0   -3.70    7.50
  -2 -28   0  292.67   23.60
  -2 -28   0  308.27   24.20
  -2 -28   0  304.97   19.20
   2 -28   0  310.37   24.30
  -2 -28   0  314.07   19.10
   2 -28   0  306.47   20.50
   2 -28   0  245.38   25.40
  -2  28   0  315.77   25.30
   2  28   0  299.57   25.10
   2  28   0  324.27   25.60
   2  28   0  273.27   23.30
  -2  28   0  307.27   22.60
   3 -28   0   71.39   12.60
  -3 -28   0   64.69   12.10
  -3 -28   0   73.19    8.10
  -3 -28   0   73.19   13.50
  -3 -28   0   79.39    8.70
   3 -28   0   68.79   11.90
   3 -28   0   61.19    9.50
  -3  28   0   63.49   13.60
  -3  28   0   89.99   11.90
   3  28   0   92.99   14.40
   3  28   0   69.89   13.90
   3  28   0   72.89   16.40
  -4 -28   0   23.50    9.60
  -4 -28   0   22.80    4.90
  -4 -28   0   24.80    8.90
   4 -28   0   24.10    8.10
  -4 -28   0   17.50    4.80
   4 -28   0   19.10    9.00
   4 -28   0   27.60    9.80
   4  28   0   22.00    9.20
  -4  28   0    9.90    8.60
   4  28   0   15.70    9.30
   4  28   0    2.40    8.40
  -4  28   0   15.80    6.70
   5 -28   0   63.19    9.70
  -5 -28   0   52.59    7.20
  -5 -28   0   59.19    6.30
   5 -28   0   57.79   12.10
  -5 -28   0   54.49   11.00
   5 -28   0   55.19   10.40
  -5 -28   0   45.10   11.00
  -5  28   0   60.09   10.00
  -5  28   0   56.39   12.90
   5  28   0   55.09   12.50
   5  28   0   49.70   11.70
   5  28   0   57.99   12.30
   6 -28   0   13.30    7.30
   6 -28   0   15.90    8.30
  -6 -28   0    0.70    4.60
   6 -28   0   16.30    8.90
  -6 -28   0    1.10    6.00
  -6 -28   0    3.40    8.00
   6  28   0    2.10    8.30
   6  28   0    0.00    7.60
  -6  28   0   10.50    5.60
   6  28   0    8.00    8.90
  -7 -28   0   19.50    8.10
   7 -28   0    8.10    7.60
   7 -28   0   -4.40    6.40
  -7 -28   0    0.70    4.30
  -7 -28   0   -6.00    6.80
   7  28   0    0.90    7.80
  -7  28   0    9.60    5.30
   7  28   0   15.90    8.60
   7  28   0    2.40    7.30
  -8 -28   0   20.40    9.50
  -8 -28   0   31.80    8.50
  -8 -28   0   23.20    6.20
   8 -28   0   33.40    9.40
   8 -28   0   46.30   11.60
   8  28   0   40.40   10.80
   8  28   0   37.60   10.70
   8  28   0   36.60   10.90
  -8  28   0   29.70    6.50
   9 -28   0   41.10   12.10
  -9 -28   0   25.20    9.20
  -9 -28   0   35.80    8.60
   9 -28   0   14.50    7.60
  -9  28   0   22.30    5.40
   9  28   0   20.50    8.20
   9  28   0   43.50   12.60
   9  28   0   20.70    9.90
  10 -28   0   18.00    8.60
  10 -28   0   21.30    9.90
  10 -28   0   22.20    9.30
 -10 -28   0   23.70    9.40
  10  28   0   31.50   10.80
  10  28   0   13.00    8.00
  10  28   0   29.40   10.70
  11 -28   0   19.80    9.00
 -11 -28   0   -6.30    3.40
  11 -28   0   -1.10    6.60
 -11 -28   0    2.10    6.90
  11 -28   0    4.30    7.30
 -11  28   0   -6.00    2.40
  11  28   0   -6.40    8.60
  11  28   0    8.60    8.70
  11  28   0   20.10    7.90
  12 -28   0  280.37   22.50
  12 -28   0  267.67   24.50
 -12 -28   0  202.48   21.40
  12 -28   0  241.38   26.20
  12  28   0  258.87   23.20
  12  28   0  217.68   25.10
  13 -28   0   -3.70    7.40
  13 -28   0   -3.40    6.60
  13 -28   0    0.50    7.40
 -13 -28   0   -3.50    8.90
  13  28   0   -1.20    6.20
  13  28   0    4.20   10.00
   0 -29   0    0.70    7.50
   0 -29   0    4.60    4.80
   0 -29   0    7.60    8.30
   0  29   0   16.80    9.30
   0  29   0   -3.40    6.30
   1 -29   0   99.09   14.70
   1 -29   0  109.19   16.10
  -1 -29   0  101.69   10.40
  -1 -29   0   98.29   14.90
  -1 -29   0   99.69   13.80
   1 -29   0   95.69   10.90
  -1  29   0   94.39   13.30
   1  29   0  172.18   26.40
   1  29   0   86.29   14.90
  -1  29   0  105.19   15.70
   2 -29   0    4.00    7.40
   2 -29   0   -4.20    4.50
   2 -29   0   -5.50    6.20
  -2 -29   0    5.80    5.70
  -2 -29   0    5.60    8.30
  -2 -29   0    4.00    4.00
  -2 -29   0   -5.10    6.80
   2  29   0    2.70    8.90
   2  29   0   -5.80    7.20
  -2  29   0  -10.30    7.10
  -2  29   0    3.90    6.30
   2  29   0   -1.80    7.00
   3 -29   0    9.10    5.80
  -3 -29   0    7.50    4.70
  -3 -29   0    0.10    7.80
  -3 -29   0    3.40    7.10
   3 -29   0  -10.00    6.50
   3 -29   0   11.90    7.90
  -3 -29   0    1.00    3.70
  -3  29   0    3.30    8.40
   3  29   0    5.80    8.40
  -3  29   0    3.50    5.80
   3  29   0   -2.70    7.60
   3  29   0    0.10    6.90
  -4 -29   0  102.79    9.30
  -4 -29   0   95.09    9.80
   4 -29   0  102.09   14.30
  -4 -29   0  113.59   15.10
   4 -29   0   94.39   11.50
   4 -29   0  116.39   17.00
  -4 -29   0  119.99   15.90
  -4  29   0  117.29   17.30
  -4  29   0  120.49   13.70
   4  29   0  101.59   15.60
   4  29   0  100.39   15.80
   4  29   0   69.89   13.50
  -5 -29   0   45.00   11.30
   5 -29   0   49.30    9.10
   5 -29   0   54.49   12.10
   5 -29   0   68.99   12.00
  -5 -29   0   47.90    6.80
  -5 -29   0   57.69   11.10
  -5 -29   0   36.20    5.30
   5  29   0   62.49   13.80
   5  29   0   45.30   11.70
   5  29   0   68.69   12.90
  -5  29   0   64.29    9.80
  -6 -29   0  117.99   12.10
  -6 -29   0  145.69   16.50
  -6 -29   0  158.78   17.70
   6 -29   0  195.88   19.40
   6 -29   0  131.49   14.70
   6  29   0  181.28   20.50
   6  29   0  165.58   18.80
   6  29   0  153.48   19.30
  -6  29   0  149.99   13.80
   7 -29   0    1.50    6.10
  -7 -29   0    1.10    6.20
   7 -29   0    0.30    7.10
  -7 -29   0   10.00    9.00
   7  29   0    1.20    8.30
   7  29   0   11.10    9.60
  -7  29   0    8.60    5.50
   7  29   0   -2.30    6.60
   8 -29   0  195.68   20.10
  -8 -29   0  183.68   19.70
   8 -29   0  179.28   17.30
  -8 -29   0  203.98   18.80
   8  29   0  208.28   21.40
  -8  29   0  171.68   14.70
   8  29   0  214.28   21.00
   8  29   0  190.68   20.40
   9 -29   0   -0.80    6.40
  -9 -29   0   -1.70    3.60
  -9 -29   0    2.40    7.90
   9 -29   0    7.20    8.10
   9 -29   0    4.50    8.00
  -9  29   0   -5.30    2.60
   9  29   0    1.10    7.90
   9  29   0   -3.30    7.30
   9  29   0    4.00    8.20
  10 -29   0   64.89   12.70
 -10 -29   0   48.50   11.40
  10 -29   0   38.20    9.50
  10 -29   0   41.90   10.90
  10  29   0   60.49   14.50
  10  29   0   44.60   12.60
  10  29   0   50.09   12.20
  11 -29   0   -8.80    6.50
  11 -29   0    2.00    7.60
 -11 -29   0  -12.00    6.20
 -11 -29   0   -9.00    3.70
  11 -29   0    3.00    7.80
  11  29   0    3.80   10.50
 -11  29   0   12.00    4.70
  12 -29   0   -6.40    7.40
  12 -29   0   11.20    7.90
 -12 -29   0   -5.10    4.60
  12 -29   0    1.90    6.60
 -12 -29   0   17.30   13.80
  12  29   0    4.40    9.10
  12  29   0    0.60    8.20
  12  29   0    5.00    7.80
   0 -30   0  442.06   30.60
   0 -30   0  395.56   25.60
   0 -30   0  425.16   30.70
   0  30   0  431.76   30.00
   0  30   0  446.06   32.40
   1 -30   0   41.50    7.40
  -1 -30   0   21.10   11.20
  -1 -30   0   24.60    6.30
   1 -30   0   29.80    9.70
   1 -30   0   26.20    9.10
  -1 -30   0   33.20   10.60
  -1  30   0   24.50   10.60
   1  30   0   25.60   11.20
  -1  30   0   25.40    9.60
   1  30   0   50.19   10.70
   2 -30   0  219.38   21.50
  -2 -30   0  281.17   24.00
  -2 -30   0  250.67   22.70
   2 -30   0  242.78   17.90
   2 -30   0  219.38   21.70
  -2 -30   0  249.48   16.80
   2  30   0  241.88   22.40
   2  30   0  216.28   21.20
  -2  30   0  234.78   20.10
  -2  30   0  267.97   24.30
   3 -30   0  185.18   19.70
  -3 -30   0  216.08   20.10
  -3 -30   0  218.78   20.60
   3 -30   0  188.38   16.00
  -3 -30   0  199.88   14.30
   3 -30   0  191.98   20.60
  -3  30   0  175.98   21.60
   3  30   0  201.48   20.10
   3  30   0  230.18   21.70
   3  30   0  186.48   20.60
  -3  30   0  212.48   18.30
  -4 -30   0   71.59   13.70
   4 -30   0   64.19   12.40
   4 -30   0   77.19   14.00
  -4 -30   0   56.69   11.60
   4 -30   0   69.29   10.40
  -4 -30   0   68.09    7.80
   4  30   0   83.69   13.70
   4  30   0   77.89   14.30
   4  30   0   43.30   11.50
  -4  30   0   80.59   11.40
  -4  30   0   79.19   14.80
  -5 -30   0  159.88   19.90
   5 -30   0  168.28   18.20
   5 -30   0  169.18   19.10
  -5 -30   0  185.88   18.10
   5 -30   0  146.19   15.00
  -5  30   0  147.39   14.80
   5  30   0  159.78   19.40
   5  30   0  146.79   19.20
   5  30   0  138.79   18.60
   6 -30   0  148.19   18.20
   6 -30   0  118.99   14.20
  -6 -30   0  109.19   14.40
  -6 -30   0  149.69   18.50
   6  30   0  161.08   19.70
   6  30   0  139.39   19.10
  -6  30   0  123.69   13.00
   6  30   0  140.69   18.70
  -7 -30   0   16.30    8.10
  -7 -30   0   17.50    9.60
   7 -30   0   37.10   10.40
   7 -30   0   19.10    7.60
   7  30   0   10.70    9.30
   7  30   0   25.90   10.40
   7  30   0   23.90    9.50
  -7  30   0   24.30    6.80
   8 -30   0    8.40    7.10
  -8 -30   0   14.60    7.60
   8 -30   0   14.30    9.70
  -8 -30   0   33.80   11.60
  -8  30   0    6.80    3.80
   8  30   0   22.30   10.20
   8  30   0    9.10    8.80
   8  30   0   25.10   11.00
   9 -30   0  169.68   19.10
  -9 -30   0  136.89   18.50
   9 -30   0  177.98   18.60
   9 -30   0  135.09   16.10
   9  30   0  185.08   21.80
   9  30   0  179.58   19.80
   9  30   0  176.38   20.20
  10 -30   0   21.20   15.80
  10 -30   0    0.30    6.50
  10 -30   0   -5.10    6.60
 -10  30   0   -1.30    3.70
  10  30   0    7.90    8.90
  10  30   0    0.80    8.70
  10  30   0    4.30   14.90
 -11 -30   0    7.40    8.90
  11 -30   0   43.20   11.80
  11 -30   0   26.20    8.60
  11 -30   0   21.30    8.70
  11  30   0   51.79   12.30
  11  30   0   50.89   13.50
  11  30   0   32.70   10.00
   0 -31   0    9.40    5.00
   0 -31   0   24.10    9.30
   0 -31   0   -2.80    7.00
   0  31   0   12.50    8.20
   0  31   0   13.50    9.90
  -1 -31   0   36.00   10.20
  -1 -31   0   47.70    7.70
  -1 -31   0   42.50   12.00
   1 -31   0   39.10   11.00
   1 -31   0   41.50    8.10
   1 -31   0   58.99   12.50
  -1  31   0   47.60   12.50
   1  31   0   61.39   12.30
  -1  31   0   45.50   10.90
   1  31   0   47.80   12.70
   2 -31   0  344.27   26.50
  -2 -31   0  363.46   26.90
   2 -31   0  364.16   27.30
   2 -31   0  325.97   22.40
  -2 -31   0  352.36   27.50
  -2 -31   0  318.97   21.00
   2  31   0  320.37   27.70
   2  31   0  322.77   26.20
  -2  31   0  327.97   26.00
  -2  31   0  325.27   27.50
  -3 -31   0   39.40   10.30
  -3 -31   0   66.69   13.00
   3 -31   0   56.09    9.20
   3 -31   0   53.49   11.70
  -3 -31   0   48.60    7.40
   3 -31   0   56.79   12.20
  -3  31   0   58.19   13.20
   3  31   0   64.79   12.50
  -3  31   0   91.19   14.80
   3  31   0   50.29   12.80
  -4 -31   0    5.40    2.30
  -4 -31   0   -3.20    7.50
   4 -31   0    8.20    6.10
   4 -31   0   -5.30    6.60
   4 -31   0   13.00    8.60
  -4  31   0    4.70    6.40
   4  31   0    6.80    7.90
   4  31   0    1.40    7.40
  -4  31   0   -2.30    8.60
   4  31   0    0.30    8.10
   5 -31   0   32.90    8.40
  -5 -31   0   20.40    9.70
  -5 -31   0   36.70    9.80
   5 -31   0   36.20   10.50
   5 -31   0   27.70    9.30
  -5  31   0   44.80    9.00
   5  31   0   26.20   10.60
   5  31   0   29.00   11.40
   5  31   0   16.50    8.60
  -6 -31   0   26.80    8.40
  -6 -31   0   22.40    9.90
   6 -31   0   22.20    7.30
   6 -31   0   19.20   10.40
  -6  31   0   18.40    7.10
   6  31   0   22.30    9.40
   6  31   0   21.30   10.40
   6  31   0   26.00   11.50
  -7 -31   0   69.69   12.30
  -7 -31   0   95.19   15.50
   7 -31   0   82.49   14.10
   7 -31   0   69.29   10.80
   7  31   0   69.39   14.10
   7  31   0   74.49   13.50
   7  31   0   65.59   14.30
  -7  31   0   76.99   10.30
   8 -31   0   21.30    7.30
  -8 -31   0    7.30    5.60
   8 -31   0   27.60    9.90
   8  31   0   23.80   14.90
   8  31   0   30.30   11.40
  -9 -31   0   38.50   10.20
   9 -31   0   25.50    8.60
   9 -31   0   23.20   14.30
   9  31   0   37.40   11.60
   9  31   0   25.50   10.80
 -10 -31   0  104.99   15.30
  10 -31   0   94.19   13.80
  10 -31   0   84.29   14.60
  10 -31   0   81.69   12.60
  10  31   0   96.99   16.10
  10  31   0   80.39   15.00
  10  31   0   62.89   14.20
   0 -32   0   21.80    9.70
   0 -32   0   48.70   11.30
   0 -32   0   35.60    7.30
   0  32   0   35.50   12.00
   0  32   0   20.40    8.90
  -1 -32   0   74.49   13.30
  -1 -32   0   83.09   14.00
   1 -32   0   89.69   14.70
   1 -32   0   81.39   13.80
   1 -32   0  101.09   11.10
  -1 -32   0   95.79   10.80
  -1  32   0  105.59   16.70
   1  32   0  101.19   16.90
  -1  32   0   75.69   13.20
   1  32   0  112.49   15.40
   2 -32   0  203.38   16.50
  -2 -32   0  167.48   19.30
   2 -32   0  212.18   21.30
   2 -32   0  208.98   20.70
  -2 -32   0  166.78   14.40
  -2 -32   0  224.88   21.70
   2  32   0  198.38   22.00
  -2  32   0  168.08   18.50
   2  32   0  209.58   20.40
  -2  32   0  229.18   22.60
  -3 -32   0  442.66   27.20
   3 -32   0  472.15   33.70
  -3 -32   0  444.26   33.70
   3 -32   0  481.65   29.70
   3 -32   0  510.45   34.20
  -3 -32   0  472.45   33.10
   3  32   0  485.35   35.20
  -3  32   0  476.85   31.50
   3  32   0  542.75   34.70
  -3  32   0  426.06   34.30
   4 -32   0   68.69   12.50
   4 -32   0   41.30   11.20
  -4 -32   0   48.40   10.80
   4 -32   0   56.19    9.60
  -4 -32   0   52.59   12.70
   4  32   0   38.20   12.00
   4  32   0   50.69   12.00
  -4  32   0   70.79   11.30
  -4  32   0   52.89   12.40
  -5 -32   0   27.30    8.90
   5 -32   0   13.10    9.00
  -5 -32   0   16.40    9.20
   5 -32   0   11.20    6.40
  -5  32   0   44.40   13.30
   5  32   0   18.50   10.80
   5  32   0   12.20   10.30
   5  32   0   11.90    8.90
   6 -32   0    0.10    8.20
   6 -32   0   12.20    6.40
  -6 -32   0    7.50    7.00
  -6 -32   0   -3.10   12.60
   6  32   0    3.50    7.80
  -6  32   0   10.20    6.20
   6  32   0   -2.70   11.40
  -7 -32   0   13.70    9.10
   7 -32   0   31.10    8.50
   7 -32   0   23.80   10.20
   7  32   0   15.80    9.60
   7  32   0   19.80   10.70
  -7  32   0    0.30    4.00
   7  32   0   12.30    9.90
   8 -32   0   89.09   13.90
   8 -32   0   87.19   15.10
  -8 -32   0  105.59   16.30
   8  32   0   94.89   16.30
   8  32   0   59.09   17.30
   8  32   0   97.09   15.30
   0 -33   0    4.40    8.70
   0 -33   0    3.70    5.40
   0 -33   0    2.20    7.60
   0  33   0    3.40    7.80
  -1 -33   0    1.70    4.80
  -1 -33   0    7.40    8.50
   1 -33   0   12.20    5.90
  -1 -33   0   20.30   10.60
   1 -33   0    4.80    7.80
   1 -33   0   -3.50    7.60
   1  33   0    4.70    8.00
  -1  33   0    3.00    6.60
   2 -33   0   45.70   11.50
   2 -33   0   75.99   13.40
  -2 -33   0   61.09    8.30
   2 -33   0   73.49   10.20
  -2 -33   0   65.99   13.80
   2  33   0   85.69   13.60
  -2  33   0   85.59   13.50
   3 -33   0   53.89   12.30
  -3 -33   0   55.89   16.80
   3 -33   0   64.19   13.30
   3 -33   0   73.69   10.50
  -3 -33   0   74.09   14.40
  -3  33   0   93.59   13.40
   3  33   0   76.49   18.10
  -3  33   0   66.29   15.90
   3  33   0   85.89   15.20
   4 -33   0   74.29   15.00
   4 -33   0   91.69   11.70
   4 -33   0   93.09   15.00
  -4 -33   0   92.89   15.90
  -4 -33   0   88.59   14.70
  -4  33   0  117.19   14.10
   4  33   0   83.59   14.80
   4  33   0  115.79   17.30
  -5 -33   0   17.10    8.00
  -5 -33   0   42.30   11.70
   5 -33   0   -5.00    7.90
   5 -33   0   14.60    7.10
  -5  33   0   11.40    7.00
   5  33   0   -0.50    8.10
   5  33   0   -0.70    9.50
  -6 -33   0   31.00    9.90
   6 -33   0   43.00   13.80
   6 -33   0   50.59    9.30
  -6 -33   0   35.90    9.70
   6  33   0   52.29   12.70
   6  33   0   47.90   12.60
   6  33   0   32.90   14.00
   0 -34   0    1.20    8.70
   0 -34   0    0.10    8.00
   0 -34   0   12.30    5.80
   0  34   0   32.90    9.40
   0  34   0   -1.80    8.30
  -1 -34   0   69.89   13.40
   1 -34   0   39.50    8.20
   1 -34   0   51.89   12.20
   1 -34   0   40.00   10.80
  -1 -34   0   48.70    8.00
  -1 -34   0   72.19   13.60
  -1  34   0   74.09   15.20
  -1  34   0   79.39   13.00
   1  34   0   59.59   13.40
   1  34   0   66.39   12.50
   2 -34   0   25.80   11.30
  -2 -34   0   52.59   12.20
  -2 -34   0   13.00    4.60
   2 -34   0   39.10    7.60
  -2 -34   0   33.90    9.50
   2 -34   0   36.50   10.40
  -2  34   0   22.90    9.40
   2  34   0   36.90   11.30
  -2  34   0   22.60   10.30
   2  34   0   33.40   10.80
  -3 -34   0   13.60    9.30
   3 -34   0    0.30    7.40
  -3 -34   0    7.40    3.30
  -3 -34   0   -3.50    8.00
   3 -34   0   -4.30    4.90
   3 -34   0   12.40    9.20
  -3  34   0   15.80    9.70
   3  34   0   11.20    8.40
  -3  34   0    1.50    7.20
   3  34   0   20.70   11.00
  23   0  -1    8.60    4.70
  23   0  -1   -6.80    5.70
  23   0  -1   -5.10    3.60
  22   0  -1  -11.70    5.90
  22   0  -1   -1.20    4.20
  22   0  -1    8.90    3.90
  21   0  -1   38.40    6.20
  21   0  -1   33.80    7.60
  21   0  -1   35.00    9.70
  20   0  -1    5.00    5.30
  20   0  -1    5.50    3.90
  20   0  -1    3.20    7.10
  19   0  -1   -1.50    5.80
 -19   0   1    2.70    3.50
 -19   0   1    3.20    2.10
  19   0  -1    6.30    3.50
  19   0  -1    5.50    4.60
  18   0  -1   -0.90    5.40
  18   0  -1   -6.10    3.60
  18   0  -1   -3.00    2.70
 -18   0   1    2.90    3.60
 -18   0   1   -2.80    2.00
  17   0  -1   41.80    7.50
 -17   0   1   41.00    5.70
  17   0  -1   54.39    6.30
 -17   0   1   46.50    6.40
  17   0  -1   48.70    7.70
  17   0  -1   50.59    8.80
 -17   0   1   46.00    5.10
 -16   0   1    6.00    3.30
  16   0  -1    2.80    4.20
  16   0  -1   -4.90    2.80
  16   0  -1   -1.30    5.10
 -16   0   1   -1.80    2.10
 -16   0   1   -1.50    2.10
  15   0  -1    3.00    3.80
 -15   0   1    0.30    2.90
  15   0  -1   -3.90    3.70
 -15   0   1    2.50    2.50
  15   0  -1    1.70    3.30
 -15   0   1    4.50    2.70
  15   0  -1   -2.30    4.70
  14   0  -1   -1.70    3.50
  14   0  -1    0.20    3.50
  14   0  -1    0.30    4.80
 -14   0   1    0.60    2.30
  14   0  -1   -1.10    2.70
 -14   0   1   -0.40    2.30
 -14   0   1    1.70    2.70
  13   0  -1   82.39    8.30
  13   0  -1   82.19    6.90
  13   0  -1   54.99    8.40
  13   0  -1   74.99    8.10
 -13   0   1   76.39    6.20
 -13   0   1   67.29    6.90
 -13   0   1   79.09    6.80
  12   0  -1   -1.70    2.90
  12   0  -1   -1.90    2.40
 -12   0   1   -1.20    3.80
 -12   0   1   -0.40    2.10
  12   0  -1    3.50    3.20
  12   0  -1    9.10    4.70
 -12   0   1   -2.90    1.80
  11   0  -1   13.70    2.80
 -11   0   1    6.80    2.70
  11   0  -1    8.70    3.40
 -11   0   1   12.40    2.50
  11   0  -1    7.30    4.00
  11   0  -1    1.80    3.10
 -11   0   1    6.10    2.70
 -10   0   1   -1.10    1.70
  10   0  -1   -0.80    2.20
 -10   0   1   -1.10    1.60
 -10   0   1   -1.30    1.90
  10   0  -1   -2.60    2.00
  10   0  -1   -0.80    1.90
  10   0  -1   -0.50    3.00
  -9   0   1    1.60    1.80
   9   0  -1    1.40    2.70
  -9   0   1    3.70    2.20
   9   0  -1   -0.50    2.00
   9   0  -1    1.10    2.10
  -9   0   1    2.30    1.50
   9   0  -1   -0.90    1.70
  -9   0   1    2.60    2.80
  -8   0   1   -0.80    2.30
  -8   0   1    0.10    1.70
   8   0  -1    3.10    2.90
   8   0  -1   -0.40    1.70
   8   0  -1    0.50    2.00
   8   0  -1   -0.20    2.20
  -8   0   1   -2.10    1.60
   7   0  -1   32.00    4.00
  -7   0   1   34.40    3.30
   7   0  -1   25.90    3.90
   7   0  -1   26.40    3.80
  -7   0   1   42.80    5.00
  -7   0   1   36.40    3.70
   7   0  -1   31.00    3.20
   6   0  -1   -0.60    1.70
   6   0  -1    1.00    1.60
   6   0  -1    0.10    1.30
  -6   0   1   -0.70    1.20
  -6   0   1    4.40    2.30
  -6   0   1    1.00    1.20
   6   0  -1   -0.20    1.00
   5   0  -1    1.60    1.40
   5   0  -1    1.40    1.40
  -5   0   1    3.80    1.30
   5   0  -1    3.60    1.80
   5   0  -1    3.40    1.20
  -5   0   1    2.40    1.40
  -5   0   1    3.60    1.80
   5   0  -1    1.90    0.40
  -4   0   1    0.50    1.80
   4   0  -1    4.70    1.90
   4   0  -1    0.60    0.50
   4   0  -1    0.10    1.10
  -4   0   1    0.20    1.10
  -4   0   1    1.30    1.30
   4   0  -1    0.10    1.50
   4   0  -1    0.40    1.40
  -3   0   1    0.70    1.00
  -3   0   1    0.10    1.40
   3   0  -1   -0.10    0.40
   3   0  -1    0.90    0.80
  -3   0   1   -0.70    0.80
   3   0  -1   -0.10    1.00
   3   0  -1   -1.10    1.00
   3   0  -1    0.90    1.40
   2   0  -1    0.10    0.20
   2   0  -1   -0.30    0.50
  -2   0   1    0.50    0.60
  -2   0   1    0.80    0.50
  -2   0   1    0.00    0.60
   2   0  -1    0.10    0.50
  -2   0   1    0.00    0.10
   2   0  -1    0.90    0.60
   2   0  -1   -0.10    0.10
  -2   0  -1    0.60    0.60
   2   0   1    0.60    0.90
   2   0   1    0.50    0.70
  -2   0  -1    0.10    0.10
   2   0   1    0.10    0.40
   2   0   1    0.10    0.20
  -2   0  -1    0.20    0.40
  -3   0  -1  107.19    6.20
   3   0   1  118.09    6.70
   3   0   1  113.79    6.50
   3   0   1  124.79    7.40
  -3   0  -1  131.09    6.50
  -3   0  -1  135.79    6.80
   4   0   1   -0.30    1.00
   4   0   1   -0.20    1.80
  -4   0  -1    0.70    1.20
   4   0   1    1.00    1.10
  -4   0  -1    0.00    0.70
  -4   0  -1    0.70    0.90
   5   0   1   96.79    5.80
  -5   0  -1  107.59    6.00
  -5   0  -1   94.29    5.50
   5   0   1   91.79    5.70
  -5   0  -1   81.49    5.10
   5   0   1   93.99    6.70
   5   0   1   91.19    5.10
   6   0   1   -2.30    1.20
   6   0   1   -0.40    1.20
  -6   0  -1   -0.90    1.30
  -6   0  -1    0.80    1.00
   6   0   1    0.20    0.60
   6   0   1   -2.40    1.80
  -6   0  -1   -1.50    1.00
  -7   0  -1    1.70    1.20
  -7   0  -1    1.60    1.80
   7   0   1   -0.50    2.30
  -7   0  -1   -0.10    1.30
   7   0   1    1.20    0.70
   7   0   1    1.10    1.60
   7   0   1    0.90    1.60
   8   0   1    0.30    1.80
  -8   0  -1   -0.80    1.20
   8   0   1   -0.80    0.60
  -8   0  -1    3.90    1.90
   8   0   1   -0.70    0.50
   8   0   1   -2.00    2.50
   8   0   1    0.40    1.60
  -8   0  -1   -1.00    1.40
   9   0   1   51.29    5.10
  -9   0  -1   59.69    4.60
   9   0   1   34.70    5.40
   9   0   1   56.29    4.90
  -9   0  -1   57.49    4.00
  -9   0  -1   53.49    5.00
  10   0   1   -2.00    2.00
 -10   0  -1   -1.40    1.30
  10   0   1    3.60    2.20
  10   0   1   -1.70    3.10
 -10   0  -1   -0.90    1.60
 -10   0  -1   -0.40    2.00
  11   0   1   27.70    4.70
  11   0   1   23.30    5.20
 -11   0  -1   39.50    4.90
  11   0   1   44.70    4.70
 -11   0  -1   39.90    3.60
  11   0   1   32.80    4.60
 -11   0  -1   34.70    4.00
  12   0   1   -3.10    2.60
 -12   0  -1   -1.80    1.70
 -12   0  -1    2.30    2.80
  12   0   1    0.60    2.50
 -12   0  -1    0.40    2.00
  12   0   1    1.40    2.80
  12   0   1    0.00    4.00
 -13   0  -1  209.98   11.90
  13   0   1  201.58   15.50
  13   0   1  241.08   13.40
 -13   0  -1  205.38   13.50
  13   0   1  208.88   14.20
  13   0   1  204.68   14.00
 -13   0  -1  207.08   12.60
  14   0   1    6.00    3.90
 -14   0  -1    0.50    2.10
  14   0   1    0.10    3.50
  14   0   1    0.40    4.80
 -14   0  -1   -1.10    2.00
 -14   0  -1    0.30    2.80
  14   0   1    4.00    3.10
  15   0   1   34.00    6.10
 -15   0  -1   23.70    4.50
 -15   0  -1   28.20    4.00
  15   0   1   34.50    6.30
 -15   0  -1   35.50    3.80
  15   0   1   32.00    5.90
  15   0   1   25.40    6.90
 -16   0  -1    1.40    2.60
  16   0   1    0.70    5.20
 -16   0  -1   -2.00    1.50
  16   0   1    0.80    4.00
 -16   0  -1   -2.30    1.80
  16   0   1    1.60    4.00
  16   0   1   -4.30    2.90
 -17   0  -1   -1.00    1.30
  17   0   1   -3.60    3.90
  17   0   1   -1.90    4.00
  17   0   1   -2.30    3.10
  17   0   1    1.10    5.50
  18   0   1   -0.40    6.40
 -18   0  -1   -2.80    2.00
  18   0   1   -3.40    3.80
  18   0   1    1.00    3.40
 -19   0  -1   44.90    4.30
 -19   0  -1   38.40    4.40
  19   0   1   47.00    7.60
  19   0   1   52.19    6.70
  19   0   1   34.30    9.00
  20   0   1    0.40    3.30
  20   0   1    0.70    4.00
  20   0   1    4.20    7.40
  21   0   1    4.00    4.30
  21   0   1   -0.70    6.10
  21   0   1    1.50    4.20
  22   0   1    0.80    3.60
  22   0   1   -3.80    6.80
  22   0   1    2.20    3.80
  23   0   1    9.40    4.50
  23   0   1    4.50    4.60
  23   0   1   21.60    9.70
  23   0   1   14.80    8.40
  23  -1  -1   14.30    5.40
  23  -1  -1   20.70    5.10
  23  -1  -1   14.20    9.70
  23   1  -1   25.90    8.60
  23   1  -1   15.10    5.60
  22  -1  -1    5.60    4.40
  22  -1  -1  -10.30    6.00
  22  -1  -1    3.20    4.80
  22   1  -1    5.80    3.60
  22   1  -1   -1.20    4.10
  22   1  -1    4.90    7.40
  22   1  -1    2.20    6.50
  21  -1  -1   -4.70    6.90
  21  -1  -1    4.60    3.90
 -21  -1   1    4.10    2.20
  21  -1  -1    3.30    4.70
  21   1  -1    0.20    6.20
  21   1  -1    2.10    5.20
  21   1  -1    1.20    3.40
  20  -1  -1   40.10    6.20
  20  -1  -1   39.80    9.50
  20  -1  -1   49.70    8.70
  20   1  -1   44.50    5.80
  20   1  -1   30.30    7.30
  20   1  -1   53.59   10.40
  19  -1  -1    2.60    4.30
 -19  -1   1    0.00    2.00
  19  -1  -1    2.80    6.20
  19  -1  -1   -2.30    3.40
  19   1  -1   -7.20    5.80
 -19   1   1   -1.40    1.70
 -19   1   1   -1.70    3.60
 -19   1   1    2.10    1.80
  19   1  -1    0.30    3.30
  19   1  -1   -7.70    3.40
  18  -1  -1   12.10    3.90
  18  -1  -1    5.60    4.90
  18  -1  -1    1.70    5.80
 -18  -1   1    9.70    3.10
 -18  -1   1   16.00    4.00
  18   1  -1   15.10    4.20
  18   1  -1    2.90    5.90
 -18   1   1    8.50    2.60
 -18   1   1   12.60    4.20
  18   1  -1    4.60    4.50
  17  -1  -1   24.70    6.30
 -17  -1   1   26.80    4.80
 -17  -1   1   32.90    4.50
 -17  -1   1   34.80    4.60
  17  -1  -1   27.70    5.20
  17  -1  -1   34.00    6.50
  17  -1  -1   25.40    7.50
  17   1  -1   20.90    6.90
 -17   1   1   30.70    3.90
  17   1  -1   29.10    6.40
  17   1  -1   33.60    6.50
 -17   1   1   33.00    4.80
 -17   1   1   28.20    5.40
  17   1  -1   23.70    4.60
  16  -1  -1    4.10    3.80
  16  -1  -1    5.90    4.00
  16  -1  -1    9.10    4.60
  16  -1  -1   13.20    6.50
 -16  -1   1    5.30    2.80
 -16  -1   1    3.60    3.20
 -16  -1   1    3.50    2.70
 -16   1   1    8.10    3.50
  16   1  -1    7.90    4.00
  16   1  -1   10.90    5.70
 -16   1   1   10.20    2.90
  16   1  -1   12.40    4.10
 -16   1   1    9.70    3.10
  16   1  -1    2.20    4.30
 -15  -1   1   12.60    3.50
  15  -1  -1   12.80    4.30
  15  -1  -1   15.60    4.20
  15  -1  -1   13.60    4.90
  15  -1  -1   13.60    6.00
 -15  -1   1   13.30    3.30
 -15  -1   1   16.20    3.80
 -15   1   1   15.50    4.10
  15   1  -1   21.70    4.20
  15   1  -1   13.40    5.80
 -15   1   1   10.20    3.30
 -15   1   1   10.90    3.10
  15   1  -1   13.00    5.30
  15   1  -1   11.30    4.90
 -14  -1   1    2.60    2.50
  14  -1  -1   -0.10    5.00
  14  -1  -1    2.20    3.10
  14  -1  -1   -3.80    3.00
 -14  -1   1    1.00    2.20
  14  -1  -1    1.60    3.70
 -14  -1   1   -2.20    2.30
 -14   1   1   -3.30    2.10
  14   1  -1   -0.20    3.70
  14   1  -1    2.80    4.50
 -14   1   1   -1.20    2.80
  14   1  -1   -1.10    3.50
 -14   1   1   -0.10    2.20
  14   1  -1   -1.30    2.60
  13  -1  -1    4.20    3.50
  13  -1  -1    4.30    4.60
 -13  -1   1    0.30    2.30
  13  -1  -1   -1.00    3.20
  13  -1  -1    2.60    3.00
 -13  -1   1    1.50    2.30
  13   1  -1   -2.50    2.40
 -13   1   1   -0.10    2.30
 -13   1   1   -1.00    2.00
 -13   1   1    2.40    2.80
  13   1  -1    2.60    3.30
  13   1  -1    4.80    3.30
  13   1  -1    0.00    4.20
  12  -1  -1    8.30    3.00
 -12  -1   1    5.80    2.80
 -12  -1   1    2.50    2.20
  12  -1  -1    5.60    3.30
 -12  -1   1    4.20    2.40
  12  -1  -1    2.80    3.10
  12  -1  -1    3.70    4.00
 -12   1   1    6.70    2.70
 -12   1   1    2.50    2.90
 -12   1   1    5.50    2.30
  12   1  -1    6.40    3.50
  12   1  -1    7.10    4.20
  12   1  -1    8.20    2.70
  12   1  -1    3.80    3.50
 -11  -1   1    8.00    2.60
  11  -1  -1    3.90    3.60
  11  -1  -1    5.20    3.10
 -11  -1   1    6.50    4.10
  11  -1  -1   10.50    2.80
 -11  -1   1   10.20    2.90
 -11  -1   1    9.40    2.40
  11   1  -1    9.60    3.80
 -11   1   1    8.70    2.20
  11   1  -1    9.50    2.60
  11   1  -1    5.40    3.00
 -11   1   1    6.80    2.70
 -11   1   1    9.50    2.90
  11   1  -1    0.90    3.00
  10  -1  -1   10.10    2.70
 -10  -1   1    4.20    2.30
 -10  -1   1    4.00    2.00
  10  -1  -1    3.30    3.20
  10  -1  -1    1.40    2.60
  10  -1  -1   -2.30    3.20
 -10  -1   1    9.50    3.60
 -10  -1   1    7.60    2.40
  10   1  -1    4.20    3.30
  10   1  -1    5.80    3.20
 -10   1   1    4.50    2.40
  10   1  -1    2.20    2.50
  10   1  -1    2.60    1.90
 -10   1   1    6.40    2.40
   9  -1  -1    0.60    1.90
  -9  -1   1    0.10    1.40
  -9  -1   1   -1.00    1.50
  -9  -1   1   -1.10    2.60
  -9  -1   1   -3.30    1.40
   9  -1  -1   -1.40    1.90
   9  -1  -1   -2.20    2.60
   9  -1  -1    0.40    2.10
   9   1  -1    1.40    2.70
   9   1  -1   -0.20    2.00
  -9   1   1   -0.60    1.80
   9   1  -1    0.80    0.50
   9   1  -1   -2.30    2.00
   9   1  -1    0.40    1.50
  -8  -1   1    1.60    2.60
  -8  -1   1   -0.30    1.50
  -8  -1   1    1.70    1.70
  -8  -1   1   -0.50    1.80
   8  -1  -1   -0.90    1.80
   8  -1  -1   -0.90    2.10
   8  -1  -1    1.00    2.10
   8  -1  -1   -2.30    2.70
  -8   1   1   -0.20    1.80
   8   1  -1   -0.60    2.40
   8   1  -1   -1.30    1.50
  -8   1   1    2.50    2.90
  -8   1   1    2.10    1.90
   8   1  -1    4.50    2.30
   8   1  -1   -0.20    0.70
   7  -1  -1    3.00    2.00
  -7  -1   1    4.10    1.70
   7  -1  -1    2.60    1.70
  -7  -1   1    7.90    2.00
   7  -1  -1    4.30    1.90
  -7  -1   1    5.00    1.60
   7  -1  -1    6.10    2.70
  -7  -1   1    7.60    2.80
   7   1  -1    3.80    0.80
   7   1  -1    2.20    1.90
  -7   1   1    6.50    2.80
   7   1  -1    3.70    2.50
  -7   1   1    4.80    1.80
  -7   1   1    4.30    2.00
   7   1  -1    4.90    1.50
   6  -1  -1    5.30    1.70
  -6  -1   1    4.30    1.40
   6  -1  -1    4.20    2.50
   6  -1  -1    3.80    1.70
  -6  -1   1    5.30    1.60
  -6  -1   1    5.40    2.30
   6  -1  -1    2.40    1.60
  -6   1   1    7.20    1.90
   6   1  -1    3.90    0.80
  -6   1   1    6.10    1.70
   6   1  -1    5.60    2.10
  -6   1   1    4.10    2.20
   6   1  -1    1.80    1.50
   6   1  -1    4.50    1.30
   5  -1  -1    4.10    1.60
  -5  -1   1    7.80    1.30
  -5  -1   1    6.30    1.40
   5  -1  -1    5.30    1.90
  -5  -1   1    3.60    1.70
   5  -1  -1    3.50    1.30
   5  -1  -1    2.60    1.40
  -5   1   1    6.10    2.10
   5   1  -1    4.30    1.90
   5   1  -1    4.70    0.80
  -5   1   1    6.50    1.70
  -5   1   1    9.70    1.80
   5   1  -1    5.50    1.20
   5   1  -1    6.30    1.70
  -4  -1   1   51.49    3.20
   4  -1  -1   47.20    3.90
   4  -1  -1   47.70    3.50
  -4  -1   1   53.99    3.80
  -4  -1   1   49.10    4.10
  -4  -1   1   46.60    2.80
   4  -1  -1   42.70    3.70
  -4   1   1   48.40    3.80
   4   1  -1   44.20    3.70
  -4   1   1   45.40    4.20
   4   1  -1   47.40    4.10
   4   1  -1   39.70    2.80
   4   1  -1   52.39    3.10
  -4   1   1   48.70    3.50
   3  -1  -1    2.90    1.30
   3  -1  -1    1.10    1.60
   3  -1  -1    4.30    1.40
  -3  -1   1    2.10    1.40
  -3  -1   1    1.50    1.10
   3  -1  -1    3.00    1.20
  -3  -1   1    1.90    0.70
  -3  -1   1    3.80    0.80
  -3   1   1    4.60    1.40
  -3   1   1    6.60    1.80
  -3   1   1    2.60    1.20
   3   1  -1    1.20    0.50
   3   1  -1    1.00    1.30
  -3   1   1    3.50    1.40
   3   1  -1    2.90    0.80
   3   1  -1    0.90    1.30
   2  -1  -1    0.60    0.60
   2  -1  -1    0.30    0.70
   2  -1  -1    1.60    0.80
  -2  -1   1    0.00    0.60
   2  -1  -1    0.80    0.60
  -2  -1   1   -0.60    0.60
  -2  -1   1    0.30    0.40
  -2  -1   1    0.50    0.40
  -2   1   1    0.20    0.70
   2   1  -1   -0.10    0.20
   2   1  -1    0.40    0.20
   2   1  -1   -0.10    0.50
   2   1  -1    1.30    0.70
  -2   1   1   -0.10    0.50
  -2   1   1    0.70    0.70
  -2   1   1    1.10    0.70
   1  -1   1    0.10    0.20
   1  -1   1    0.00    0.10
   1  -1   1   -0.20    0.20
  -1  -1  -1    1.00    0.40
  -1  -1  -1    1.00    0.70
   1  -1   1   -0.10    0.10
   1   1   1    0.00    0.10
   1   1   1    0.20    0.10
   1   1   1    0.00    0.20
   1   1   1   -0.30    0.20
   1   1   1    0.00    0.20
  -1   1  -1    1.60    0.70
  -2  -1  -1    0.30    0.90
  -2  -1  -1    0.10    0.40
   2  -1   1    0.90    0.60
   2  -1   1   -0.20    0.40
   2  -1   1    1.10    0.80
  -2  -1  -1   -0.10    0.60
  -2   1  -1   -1.20    0.70
   2   1   1    0.00    0.80
  -2   1  -1    0.80    0.50
   2   1   1   -0.50    0.50
   2   1   1    0.20    0.50
  -2   1  -1    0.60    0.60
   2   1   1   -0.20    0.50
  -3  -1  -1   68.19    4.50
   3  -1   1   62.19    4.20
   3  -1   1   57.79    3.90
  -3  -1  -1   67.49    3.70
   3  -1   1   59.19    3.40
  -3  -1  -1   56.59    3.70
  -3  -1  -1   65.69    3.80
  -3   1  -1   60.09    3.80
   3   1   1   55.89    3.70
  -3   1  -1   66.29    3.50
   3   1   1   55.79    3.60
   3   1   1   57.69    4.30
  -3   1  -1   66.29    4.30
   3   1   1   58.79    3.70
  -4  -1  -1  106.59    5.80
   4  -1   1  101.59    6.10
   4  -1   1   95.49    5.90
  -4  -1  -1  104.89    5.70
   4  -1   1   97.89    6.80
  -4  -1  -1   94.89    5.60
  -4  -1  -1  108.39    6.60
   4  -1   1   94.19    5.20
  -4   1  -1  108.69    6.20
   4   1   1   92.79    5.70
  -4   1  -1  103.39    5.80
   4   1   1  106.19    6.50
   4   1   1   97.99    5.70
   5  -1   1    2.40    0.60
   5  -1   1    1.60    1.30
  -5  -1  -1    1.00    1.70
  -5  -1  -1    1.60    1.00
  -5  -1  -1    4.30    1.20
   5  -1   1    1.70    1.40
   5  -1   1    0.60    2.10
  -5  -1  -1    1.80    1.20
   5   1   1    0.30    1.60
   5   1   1    1.20    1.10
  -5   1  -1    3.00    1.70
  -5   1  -1    2.30    1.10
   5   1   1    2.90    1.20
  -6  -1  -1   32.30    2.80
   6  -1   1   33.80    3.40
   6  -1   1   29.50    3.30
  -6  -1  -1   38.30    3.20
   6  -1   1   21.90    3.70
   6  -1   1   32.30    2.00
  -6  -1  -1   35.20    3.00
  -6  -1  -1   40.60    4.50
  -6   1  -1   40.80    3.70
  -6   1  -1   38.00    3.20
   6   1   1   34.40    3.00
   6   1   1   28.50    4.10
   6   1   1   31.40    3.30
  -7  -1  -1   59.39    4.10
   7  -1   1   34.40    5.00
   7  -1   1   44.70    4.40
   7  -1   1   48.30    4.50
  -7  -1  -1   51.19    3.80
  -7  -1  -1   50.19    4.20
   7  -1   1   50.09    4.60
   7   1   1   51.39    4.40
   7   1   1   59.99    4.30
  -7   1  -1   52.29    4.70
  -7   1  -1   52.89    4.20
  -7   1  -1   47.40    3.40
   7   1   1   47.80    5.30
   7   1   1   52.89    3.20
   8  -1   1   32.30    5.10
   8  -1   1   46.10    4.40
  -8  -1  -1   43.60    3.70
   8  -1   1   40.70    4.50
   8  -1   1   40.10    4.50
  -8  -1  -1   52.69    4.00
  -8  -1  -1   43.50    4.10
   8   1   1   40.00    4.40
  -8   1  -1   43.40    3.20
   8   1   1   43.40    4.00
   8   1   1   41.60    2.80
  -8   1  -1   46.70    4.00
   8   1   1   36.60    5.20
  -8   1  -1   45.30    4.60
   9  -1   1   21.10    3.50
   9  -1   1   20.60    3.40
   9  -1   1   22.80    3.80
   9  -1   1   15.70    4.50
  -9  -1  -1   19.50    2.70
  -9  -1  -1   19.00    3.10
  -9  -1  -1   23.90    3.00
   9   1   1   23.80    1.80
   9   1   1   13.90    4.10
  -9   1  -1   28.70    2.50
  -9   1  -1   12.90    3.10
   9   1   1   23.60    3.10
   9   1   1   20.60    3.50
  -9   1  -1   25.10    3.20
   9   1   1   21.90    2.00
 -10  -1  -1   25.40    3.60
  10  -1   1   16.60    3.50
 -10  -1  -1   23.30    2.90
 -10  -1  -1   19.10    3.10
  10  -1   1   20.90    3.90
  10  -1   1   25.50    3.80
  10   1   1   21.80    3.80
 -10   1  -1   21.40    3.90
 -10   1  -1   21.20    2.50
 -10   1  -1   24.00    3.40
  10   1   1   12.90    4.00
  10   1   1   21.80    3.20
  10   1   1   21.70    1.70
  10   1   1   21.10    1.50
 -11  -1  -1   13.10    2.70
  11  -1   1   12.30    3.60
  11  -1   1   13.90    3.90
  11  -1   1   19.30    3.50
  11  -1   1    6.70    4.00
 -11  -1  -1   13.30    2.50
 -11  -1  -1   13.70    3.20
 -11   1  -1   16.00    2.90
 -11   1  -1   11.40    2.10
  11   1   1   15.90    3.10
  11   1   1    8.40    4.10
  11   1   1   12.70    3.30
 -11   1  -1   13.80    3.80
 -12  -1  -1    1.00    2.50
  12  -1   1   -0.50    2.70
  12  -1   1    3.20    4.20
 -12  -1  -1   -1.20    2.00
  12  -1   1   -0.40    2.70
 -12  -1  -1    3.70    2.10
  12  -1   1    3.50    3.10
  12   1   1   -0.20    2.80
 -12   1  -1    2.10    2.80
  12   1   1    2.30    3.10
  12   1   1    2.80    2.50
 -12   1  -1    3.00    2.40
 -12   1  -1   -1.90    1.50
  12   1   1   -2.80    3.50
 -13  -1  -1    1.90    2.90
 -13  -1  -1    1.10    2.20
  13  -1   1    1.80    3.10
  13  -1   1    1.90    3.00
 -13  -1  -1    1.60    2.20
  13  -1   1    2.60    4.80
  13  -1   1    2.00    3.30
  13   1   1    3.20    3.20
 -13   1  -1    4.80    2.00
  13   1   1    2.80    4.40
  13   1   1   -2.10    3.00
 -13   1  -1    0.20    2.80
 -13   1  -1    4.00    2.50
  13   1   1    5.80    2.90
  14  -1   1   16.30    4.70
 -14  -1  -1   18.80    3.90
 -14  -1  -1   21.20    3.60
  14  -1   1   18.70    6.20
  14  -1   1   17.50    4.70
 -14  -1  -1   22.30    3.40
  14   1   1   19.30    3.90
  14   1   1   20.40    5.50
 -14   1  -1   19.20    2.80
  14   1   1   19.20    4.80
 -14   1  -1   16.90    4.30
  14   1   1   12.50    5.60
 -14   1  -1   16.10    3.40
  15  -1   1   26.90    7.20
 -15  -1  -1   31.80    3.90
 -15  -1  -1   32.40    5.00
 -15  -1  -1   26.00    3.80
  15  -1   1   33.60    6.20
  15  -1   1   30.80    5.90
  15  -1   1   35.70    5.50
 -15   1  -1   26.60    5.10
  15   1   1   34.50    5.90
 -15   1  -1   27.40    4.20
  15   1   1   34.70    4.90
 -15   1  -1   29.20    3.30
  15   1   1   34.20    6.10
  15   1   1   25.70    6.70
 -16  -1  -1    3.60    2.00
 -16  -1  -1   -2.10    1.80
  16  -1   1    6.00    5.60
  16  -1   1    3.80    4.00
  16  -1   1    9.80    4.40
  16  -1   1   -0.40    3.30
  16   1   1    1.50    3.90
  16   1   1    1.60    3.70
 -16   1  -1    0.20    1.40
 -16   1  -1    1.30    3.20
  16   1   1   -1.70    3.30
 -16   1  -1    3.70    2.20
  16   1   1   -0.30    4.80
  17  -1   1    1.80    3.60
  17  -1   1    3.40    3.80
 -17  -1  -1    6.20    2.40
  17  -1   1    1.00    5.60
  17  -1   1   11.20    4.80
 -17  -1  -1    4.30    2.10
  17   1   1    0.60    5.50
 -17   1  -1   11.50    3.80
  17   1   1   10.50    4.20
  17   1   1    5.40    4.10
 -17   1  -1    0.60    2.30
  17   1   1    5.40    3.50
 -18  -1  -1    4.60    2.20
 -18  -1  -1    5.70    1.50
  18  -1   1    3.00    3.80
  18  -1   1    6.90    4.00
  18  -1   1    2.70    4.50
  18   1   1    3.60    5.90
  18   1   1    9.20    4.40
  18   1   1    5.80    3.40
 -18   1  -1    0.20    2.40
 -19  -1  -1    7.80    2.40
  19  -1   1   12.70    4.10
  19  -1   1   -0.90    6.00
  19  -1   1    9.40    4.80
 -19   1  -1    7.30    2.70
  19   1   1    9.50    7.00
  19   1   1   10.00    5.30
  19   1   1   11.30    3.70
  20  -1   1    8.40    5.30
  20  -1   1    8.40    4.40
  20  -1   1    4.00    7.20
  20   1   1    3.20    6.80
  20   1   1    5.40    4.70
  20   1   1    8.80    3.70
 -20   1  -1    7.90    2.30
  21  -1   1   16.40    7.80
  21  -1   1    6.80    4.30
  21  -1   1   12.50    5.30
  21   1   1   -3.50    6.60
  21   1   1    8.90    4.10
  21   1   1    6.10    4.40
  22  -1   1    3.00    7.70
  22  -1   1   -1.50    3.90
  22  -1   1   -2.00    4.10
  22   1   1    6.80    3.60
  22   1   1    1.30    7.10
  22   1   1    0.30    4.20
  22   1   1   18.70    9.10
  23  -1   1   -1.70    4.00
  23  -1   1   -2.80    7.30
  23  -1   1   -3.50    3.90
  23   1   1   -9.80    7.30
  23   1   1    1.50   11.90
  23   1   1    7.80    3.70
  23   1   1    2.10    4.20
  23  -2  -1   20.30    6.00
  23  -2  -1   19.00    5.60
  23   2  -1   44.50   10.20
  23   2  -1   20.50    6.00
  22  -2  -1    3.50    5.00
  22  -2  -1    5.10    7.60
  22  -2  -1   -2.70    4.50
  22   2  -1   14.10    7.30
  22   2  -1    3.20    4.70
  22   2  -1    9.90    7.60
 -21  -2   1   -0.10    1.90
  21  -2  -1    6.00    4.70
  21  -2  -1    7.60    8.00
  21  -2  -1    6.10    5.20
  21   2  -1    4.00    7.30
  21   2  -1    2.80    3.40
  21   2  -1    8.20    5.20
  21   2  -1    8.00    7.20
 -20  -2   1    2.60    1.70
  20  -2  -1    2.30    4.20
 -20  -2   1    0.00    1.10
  20  -2  -1   -6.20    4.80
  20  -2  -1    9.20    7.10
  20   2  -1    5.50    4.60
  20   2  -1    2.70    5.90
  20   2  -1   -3.90    2.70
  19  -2  -1    9.20    5.50
 -19  -2   1   13.90    3.30
  19  -2  -1    9.80    4.30
  19  -2  -1    6.90    7.10
  19   2  -1   10.40    5.10
  19   2  -1   13.10    4.00
  19   2  -1    8.70    7.00
 -19   2   1   14.30    5.40
 -19   2   1    8.30    1.70
 -19   2   1   12.00    1.90
  18  -2  -1    1.20    4.40
 -18  -2   1   -4.50    2.50
  18  -2  -1    2.40    6.30
  18  -2  -1   12.30    5.00
  18  -2  -1    0.30    3.40
 -18   2   1    3.30    2.00
 -18   2   1    2.40    3.90
  18   2  -1    2.70    6.10
  18   2  -1    6.20    3.10
 -18   2   1    2.80    1.80
  18   2  -1    1.50    4.70
 -17  -2   1    6.40    2.80
  17  -2  -1    2.00    4.40
  17  -2  -1    5.30    5.70
  17  -2  -1    3.20    3.60
 -17  -2   1   -2.00    2.40
 -17  -2   1    4.90    2.70
  17  -2  -1    4.10    3.70
 -17   2   1    2.80    2.20
  17   2  -1   10.40    5.70
  17   2  -1    2.90    3.00
 -17   2   1    2.80    3.30
  17   2  -1    8.00    4.70
 -17   2   1    0.80    2.60
  16  -2  -1  137.29   10.60
  16  -2  -1  130.09   13.20
 -16  -2   1  134.39    9.50
 -16  -2   1  108.69    9.20
  16  -2  -1  126.09   11.90
  16  -2  -1  122.49   11.10
 -16   2   1  142.19    8.60
  16   2  -1  128.29   12.50
  16   2  -1  134.89    9.50
 -16   2   1  132.49    9.90
  16   2  -1  136.09   11.70
 -16   2   1  131.59   10.60
  16   2  -1  130.59   11.60
 -15  -2   1    9.80    3.40
  15  -2  -1   11.40    4.70
  15  -2  -1   15.50    4.20
 -15  -2   1    5.90    3.10
  15  -2  -1   16.30    5.10
 -15  -2   1    9.80    3.10
  15  -2  -1    8.20    5.90
  15   2  -1   10.10    3.30
  15   2  -1   28.50    6.10
  15   2  -1   17.80    4.90
  15   2  -1    6.80    5.10
 -15   2   1   13.40    4.10
 -15   2   1    5.60    2.60
 -15   2   1   13.70    3.60
  14  -2  -1   10.60    6.10
  14  -2  -1   11.20    4.50
  14  -2  -1   11.00    4.00
 -14  -2   1    7.90    3.20
  14  -2  -1    9.70    4.30
 -14  -2   1   15.50    3.50
  14   2  -1   11.70    5.10
 -14   2   1    9.50    3.70
  14   2  -1    9.70    3.20
  14   2  -1    7.80    4.90
 -14   2   1    8.50    2.70
  14   2  -1    4.50    4.10
 -14   2   1   17.80    3.80
 -13  -2   1   20.50    3.70
 -13  -2   1   17.50    3.60
  13  -2  -1   20.50    4.30
  13  -2  -1   14.30    3.90
 -13  -2   1   13.30    3.20
  13  -2  -1   11.30    4.20
  13  -2  -1   12.90    5.60
 -13   2   1   11.00    3.40
  13   2  -1   15.00    5.20
  13   2  -1   14.00    3.00
  13   2  -1   13.60    4.20
  13   2  -1   15.40    5.00
 -13   2   1   13.80    2.80
 -13   2   1   17.40    4.10
 -12  -2   1   29.20    4.30
  12  -2  -1   19.20    5.40
  12  -2  -1   35.10    5.70
 -12  -2   1   19.80    5.40
 -12  -2   1   23.60    3.70
 -12  -2   1   32.70    4.10
  12  -2  -1   32.70    4.70
  12  -2  -1   18.90    4.50
  12   2  -1   31.40    3.80
  12   2  -1   20.30    4.50
  12   2  -1   18.10    4.30
 -12   2   1   22.90    4.20
  12   2  -1   28.50    5.60
 -12   2   1   27.10    3.50
 -12   2   1   26.20    4.10
  11  -2  -1   -2.20    2.60
  11  -2  -1    0.10    3.60
  11  -2  -1    2.50    2.50
 -11  -2   1    2.70    3.50
 -11  -2   1   -1.10    1.70
 -11  -2   1    1.30    2.10
 -11  -2   1   -3.00    1.90
  11  -2  -1    0.30    2.70
  11   2  -1   -1.50    0.70
  11   2  -1   -1.30    1.70
 -11   2   1   -3.60    1.70
  11   2  -1   -1.80    2.50
  11   2  -1   -1.50    2.90
 -11   2   1    0.00    2.20
  11   2  -1   -1.60    3.10
  10  -2  -1    7.60    3.10
 -10  -2   1    5.90    2.20
 -10  -2   1    7.10    2.50
 -10  -2   1   13.40    4.30
  10  -2  -1    4.40    2.60
  10  -2  -1    5.50    3.80
  10  -2  -1    7.40    2.90
 -10  -2   1    6.90    2.30
  10   2  -1    3.80    2.60
 -10   2   1    8.50    2.60
 -10   2   1   13.70    3.30
  10   2  -1    9.00    2.20
  10   2  -1    5.80    3.50
  10   2  -1    9.80    1.30
   9  -2  -1   -0.40    3.00
  -9  -2   1    1.90    1.60
  -9  -2   1    1.50    1.60
  -9  -2   1    0.30    1.90
   9  -2  -1    3.10    2.20
   9  -2  -1   -0.60    1.90
   9  -2  -1   -0.90    2.10
  -9  -2   1   -0.90    2.70
  -9   2   1    0.90    2.10
   9   2  -1    2.00    2.10
   9   2  -1   -0.90    2.60
   9   2  -1    1.30    0.90
   9   2  -1    0.20    1.40
  -9   2   1    1.00    1.60
   8  -2  -1   62.59    5.10
  -8  -2   1   58.79    5.00
  -8  -2   1   58.09    6.20
   8  -2  -1   50.99    5.40
   8  -2  -1   54.49    5.20
   8  -2  -1   47.80    6.00
  -8  -2   1   61.99    4.90
  -8  -2   1   62.19    4.50
  -8   2   1   61.89    5.20
   8   2  -1   58.69    3.70
   8   2  -1   52.59    5.40
   8   2  -1   42.40    5.50
  -8   2   1   59.49    5.10
   8   2  -1   58.49    4.20
   7  -2  -1    4.10    2.80
  -7  -2   1   -1.40    2.20
  -7  -2   1    1.10    1.50
  -7  -2   1    0.20    1.50
   7  -2  -1    0.20    1.80
  -7  -2   1    1.20    1.30
   7  -2  -1    2.80    2.00
   7  -2  -1   -0.30    1.80
   7   2  -1    0.10    0.90
   7   2  -1   -1.00    1.10
   7   2  -1    0.50    2.20
  -7   2   1    0.40    1.40
   7   2  -1    2.30    2.00
  -7   2   1    2.30    1.90
   6  -2  -1   17.30    2.70
  -6  -2   1   29.10    3.80
  -6  -2   1   25.80    2.80
   6  -2  -1   19.80    2.60
  -6  -2   1   29.30    3.00
   6  -2  -1   18.30    3.30
  -6  -2   1   22.10    2.30
   6  -2  -1   16.90    2.60
   6   2  -1   18.20    2.60
   6   2  -1   13.80    2.70
  -6   2   1   27.70    3.10
   6   2  -1   20.90    2.00
   6   2  -1   28.90    2.20
  -6   2   1   30.00    3.30
  -5  -2   1   17.00    1.70
   5  -2  -1   12.80    2.60
   5  -2  -1   13.30    2.30
  -5  -2   1   24.10    2.70
  -5  -2   1   12.60    2.00
  -5  -2   1   18.40    2.70
   5  -2  -1   12.10    2.00
   5  -2  -1   10.20    2.10
   5   2  -1   16.30    1.60
   5   2  -1   14.80    2.40
   5   2  -1   15.60    2.20
  -5   2   1   17.90    2.40
  -5   2   1   18.10    2.50
   5   2  -1   16.90    1.60
  -4  -2   1    2.40    1.20
   4  -2  -1    0.40    1.30
  -4  -2   1   -0.70    0.80
   4  -2  -1   -0.30    1.30
   4  -2  -1   -0.30    1.40
  -4  -2   1    0.80    0.70
   4  -2  -1   -0.40    1.80
  -4  -2   1    0.40    1.20
  -4  -2   1   -0.60    1.40
  -4   2   1    0.30    1.30
   4   2  -1    0.00    1.50
  -4   2   1    1.30    1.30
   4   2  -1    1.50    1.30
  -4   2   1    2.90    1.40
  -4   2   1    1.20    0.50
   4   2  -1    0.70    0.70
   4   2  -1    0.80    0.80
  -3  -2   1   49.99    3.90
   3  -2  -1   50.09    3.80
  -3  -2   1   60.29    3.00
   3  -2  -1   51.79    4.10
   3  -2  -1   46.50    3.80
  -3  -2   1   54.59    3.50
   3  -2  -1   49.00    4.40
  -3  -2   1   59.19    4.00
  -3  -2   1   63.09    4.00
  -3   2   1   61.19    4.10
  -3   2   1   47.50    3.80
   3   2  -1   52.29    3.40
  -3   2   1   59.19    3.90
   3   2  -1   51.89    3.90
   3   2  -1   56.19    3.10
  -2  -2   1    7.00    1.10
  -2  -2   1    6.30    1.20
  -2  -2   1    8.60    1.30
   2  -2  -1    7.00    1.10
   2  -2  -1    5.40    1.00
   2  -2  -1    7.10    1.20
   2  -2  -1    5.10    1.20
  -2  -2   1    6.40    1.00
   2   2  -1    7.70    1.20
  -2   2   1    8.30    1.30
   2   2  -1    6.60    1.10
   2   2  -1    6.30    1.30
   2   2  -1    5.40    1.20
  -2   2   1    8.30    1.20
  -2   2   1    6.20    1.20
   2   2  -1    6.20    0.90
  -1  -2   1    0.50    0.50
   1  -2  -1    1.10    0.70
  -1  -2   1    0.00    0.40
  -1  -2   1    0.50    0.40
   1  -2  -1    1.00    0.40
   1  -2  -1    0.30    0.40
  -1  -2   1    0.30    0.60
  -1  -2   1    0.00    0.50
   1  -2  -1    0.20    0.50
   1  -2  -1    0.00    0.30
  -1  -2   1    0.10    0.50
  -1   2   1   -0.50    0.40
   1   2  -1    0.00    0.30
   1   2  -1    0.30    0.40
   1   2  -1    0.50    0.60
  -1   2   1   -0.10    0.30
  -1   2   1   -0.20    0.60
   1   2  -1   -0.10    0.50
  -1   2   1    0.20    0.40
  -1   2   1    1.00    0.70
   1   2  -1    0.00    0.30
   0  -2   1   18.90    1.60
   0   2  -1   14.30    1.40
   0   2   1   19.60    1.70
  -1  -2  -1   -0.10    0.10
  -1  -2  -1    0.50    0.40
  -1  -2  -1    0.00    0.60
   1  -2   1    0.00    0.60
  -1  -2  -1    0.20    0.70
   1  -2   1   -0.20    0.30
   1  -2   1    1.00    0.70
   1  -2   1    0.00    0.30
   1  -2   1    0.10    0.20
  -1  -2  -1    0.40    0.50
   1  -2   1    0.00    0.50
   1  -2   1   -0.10    0.10
   1   2   1    0.80    0.60
  -1   2  -1    0.20    0.60
   1   2   1   -0.10    0.20
   1   2   1   -0.20    0.20
  -1   2  -1    0.00    0.10
   1   2   1    0.10    0.50
  -1   2  -1    0.10    0.40
  -1   2  -1   -0.30    0.70
  -1   2  -1    0.50    0.50
   1   2   1   -0.20    0.40
  -1   2  -1   -0.10    0.60
  -1   2  -1    0.90    0.50
   2  -2   1    4.80    0.80
   2  -2   1    4.00    0.80
   2  -2   1    4.10    1.30
  -2  -2  -1    5.10    0.90
  -2  -2  -1    6.50    1.20
  -2  -2  -1    3.90    1.20
   2  -2   1    3.10    1.10
  -2   2  -1    7.30    1.40
  -2   2  -1    5.10    0.90
   2   2   1    6.10    1.20
   2   2   1    4.20    0.90
  -2   2  -1    4.80    1.10
  -2   2  -1    3.20    0.70
   2   2   1    6.00    1.70
   2   2   1    4.90    1.00
   2   2   1    6.30    1.20
  -2   2  -1    3.20    0.80
  -3  -2  -1  185.48   10.10
   3  -2   1  186.48   10.40
   3  -2   1  179.88   10.20
   3  -2   1  180.78    9.90
  -3  -2  -1  219.38   10.50
  -3  -2  -1  201.98    9.90
   3  -2   1  186.98    9.70
   3   2   1  174.18    9.90
  -3   2  -1  198.28    9.60
  -3   2  -1  220.98   10.60
  -3   2  -1  197.18   10.20
   3   2   1  176.78   10.00
   3   2   1  172.48    9.70
  -3   2  -1  211.18    9.80
   3   2   1  191.58   10.30
  -4  -2  -1  119.69    5.90
   4  -2   1   95.69    5.40
  -4  -2  -1  118.99    6.80
   4  -2   1  102.19    6.40
  -4  -2  -1   97.99    6.00
  -4  -2  -1  108.69    5.80
   4  -2   1   94.19    5.90
   4  -2   1   96.09    6.20
  -4   2  -1  111.79    5.60
   4   2   1   93.79    5.60
   4   2   1  108.59    6.50
  -4   2  -1  118.09    6.60
   4   2   1   92.99    5.90
  -4   2  -1  102.69    6.10
   4   2   1  103.59    6.00
   5  -2   1   22.50    2.50
   5  -2   1   21.80    1.60
  -5  -2  -1   26.90    2.30
   5  -2   1   17.10    3.30
   5  -2   1   18.60    2.40
  -5  -2  -1   24.10    2.50
  -5  -2  -1   31.90    3.60
  -5  -2  -1   24.80    2.30
   5  -2   1   27.60    3.00
  -5   2  -1   27.10    3.00
   5   2   1   21.00    3.00
   5   2   1   21.70    2.10
  -5   2  -1   26.70    1.90
  -5   2  -1   24.70    2.60
   5   2   1   27.20    2.70
   6  -2   1    7.20    2.20
  -6  -2  -1    7.50    1.60
  -6  -2  -1    9.60    2.60
   6  -2   1    4.60    1.70
   6  -2   1    6.30    2.90
  -6  -2  -1    9.90    1.70
   6  -2   1    5.80    0.70
   6  -2   1    6.20    1.70
  -6  -2  -1    6.80    1.60
   6   2   1    7.50    1.90
   6   2   1    5.90    1.40
  -6   2  -1    9.20    1.90
   6   2   1    6.30    2.30
  -6   2  -1    7.30    2.20
   7  -2   1  109.99    7.60
   7  -2   1  108.09    8.60
   7  -2   1  110.99    7.60
  -7  -2  -1  114.29    7.00
   7  -2   1  110.89    7.40
  -7  -2  -1  122.69    8.60
  -7  -2  -1  113.79    7.00
  -7  -2  -1  123.59    7.00
   7   2   1  120.09    7.40
  -7   2  -1  118.59    7.80
   7   2   1  112.39    8.20
   7   2   1  106.99    6.30
  -7   2  -1  110.89    7.20
   7   2   1  114.49    6.80
   8  -2   1   30.70    4.00
  -8  -2  -1   38.40    5.30
  -8  -2  -1   35.50    3.70
   8  -2   1   40.60    4.50
   8  -2   1   39.30    4.60
   8  -2   1   28.10    5.10
  -8  -2  -1   41.70    3.70
  -8  -2  -1   37.00    3.70
   8   2   1   32.10    4.60
  -8   2  -1   49.20    4.70
  -8   2  -1   42.40    4.00
   8   2   1   41.10    2.90
   8   2   1   43.60    3.70
   8   2   1   39.50    4.30
  -9  -2  -1   52.79    4.30
  -9  -2  -1   44.60    4.10
   9  -2   1   38.60    5.70
   9  -2   1   52.09    4.90
   9  -2   1   43.60    5.00
   9  -2   1   38.10    4.70
  -9  -2  -1   41.50    4.10
   9   2   1   52.79    4.10
   9   2   1   31.10    5.00
   9   2   1   45.10    4.90
   9   2   1   46.20    3.20
  -9   2  -1   41.80    4.80
  -9   2  -1   40.40    4.90
  -9   2  -1   49.50    3.40
 -10  -2  -1   44.40    4.20
  10  -2   1   35.20    4.70
 -10  -2  -1   58.49    5.70
  10  -2   1   31.70    6.60
  10  -2   1   46.20    5.10
  10  -2   1   48.00    5.30
 -10  -2  -1   43.70    4.50
  10   2   1   39.90    3.00
  10   2   1   43.40    5.00
  10   2   1   30.10    5.40
 -10   2  -1   44.50    3.40
  10   2   1   49.90    4.20
 -10   2  -1   39.30    4.40
 -11  -2  -1   57.89    4.90
  11  -2   1   63.69    7.60
 -11  -2  -1   50.79    5.10
  11  -2   1   36.20    6.70
 -11  -2  -1   53.59    4.80
  11  -2   1   63.39    6.00
  11   2   1   54.09    3.60
  11   2   1   59.39    6.00
  11   2   1   53.89    3.30
  11   2   1   64.69    5.10
 -11   2  -1   53.79    5.30
  11   2   1   38.60    6.00
 -11   2  -1   48.00    3.90
 -11   2  -1   62.19    6.00
 -12  -2  -1    5.60    2.70
 -12  -2  -1    5.40    2.30
 -12  -2  -1    6.30    2.60
  12  -2   1   12.80    3.60
  12  -2   1    8.20    3.60
  12  -2   1    8.00    5.00
  12  -2   1    6.30    3.50
 -12   2  -1    5.40    2.60
  12   2   1    6.30    3.30
 -12   2  -1    8.90    3.60
  12   2   1    8.50    4.60
 -12   2  -1    6.80    1.80
  12   2   1    5.50    2.40
  13  -2   1   48.00    6.50
  13  -2   1   38.20    7.30
  13  -2   1   53.59    6.80
 -13  -2  -1   51.99    4.90
 -13  -2  -1   48.40    5.50
  13  -2   1   48.10    6.90
 -13  -2  -1   52.49    5.20
 -13   2  -1   51.09    4.10
 -13   2  -1   43.80    5.80
  13   2   1   60.49    5.60
  13   2   1   51.39    6.30
 -13   2  -1   56.19    5.50
  13   2   1   58.79    7.50
  13   2   1   51.19    7.70
  14  -2   1   80.99    8.50
  14  -2   1   53.19    9.00
 -14  -2  -1   81.09    6.40
 -14  -2  -1   77.59    6.20
  14  -2   1   73.49    8.20
  14  -2   1   89.89    8.00
  14   2   1   87.59    6.90
  14   2   1   83.19    8.30
 -14   2  -1   61.79    6.30
 -14   2  -1   72.09    7.90
 -14   2  -1   75.89    5.10
  14   2   1   69.09    8.70
  14   2   1   95.79   10.30
  15  -2   1   14.30    5.00
 -15  -2  -1   13.30    3.00
  15  -2   1   10.90    6.20
  15  -2   1   11.10    4.40
 -15  -2  -1   12.10    2.70
  15  -2   1    4.90    3.90
  15   2   1   10.20    5.80
 -15   2  -1   11.10    2.00
 -15   2  -1    7.50    2.90
 -15   2  -1   13.00    2.00
  15   2   1   12.80    3.30
 -15   2  -1   12.60    4.20
  15   2   1    9.50    4.50
  15   2   1   18.70    4.90
  16  -2   1    1.60    3.70
  16  -2   1    0.20    3.40
 -16  -2  -1    2.00    2.20
  16  -2   1    7.20    4.30
  16  -2   1   -0.80    5.50
 -16  -2  -1    2.50    2.00
  16   2   1    5.50    3.90
 -16   2  -1    3.30    4.00
  16   2   1   -3.20    2.70
  16   2   1   -0.20    3.70
  16   2   1    7.10    5.50
 -16   2  -1   -0.20    2.90
 -17  -2  -1    0.60    2.00
  17  -2   1    2.30    4.30
  17  -2   1   -4.40    3.20
 -17  -2  -1    0.90    2.20
 -17  -2  -1    1.10    2.00
  17  -2   1    1.60    5.70
 -17   2  -1    1.10    2.20
  17   2   1    1.10    4.10
 -17   2  -1   -1.20    3.10
  17   2   1    0.80    3.80
  17   2   1    3.90    5.50
 -18  -2  -1    7.90    2.10
  18  -2   1    6.50    4.30
  18  -2   1   -1.30    8.50
 -18  -2  -1    6.90    2.30
 -18  -2  -1    5.90    2.60
  18  -2   1    7.70    4.50
  18  -2   1    0.00    4.00
  18   2   1    9.80    3.40
  18   2   1    6.50    6.50
  18   2   1    2.50    4.20
 -18   2  -1    2.90    2.70
  19  -2   1    4.30    4.50
  19  -2   1    0.60    4.00
  19  -2   1   -0.50    6.50
  19   2   1    5.70    4.70
  19   2   1   -3.10    6.00
  19   2   1   11.50    3.50
  20  -2   1    8.60    7.50
  20  -2   1    6.50    4.60
  20  -2   1    2.40    4.40
  20   2   1   -0.40    6.30
  20   2   1    6.20    8.00
  20   2   1    1.70    3.10
  20   2   1    1.00    3.70
  21  -2   1    9.90    7.60
  21  -2   1   10.10    4.80
  21  -2   1   18.60    5.30
  21   2   1   19.60    5.70
  21   2   1   19.50    8.90
  21   2   1   11.70    3.70
  21   2   1    3.80    6.60
  22  -2   1   18.80    5.70
  22  -2   1   31.40   10.00
  22  -2   1   11.90    5.60
  22   2   1   30.60    6.50
  22   2   1   30.80    9.00
  22   2   1   31.00    4.70
  22   2   1   13.20    9.40
  23  -2   1   -5.10    6.90
  23  -2   1   10.30    5.50
  23  -2   1   11.50    5.00
  23   2   1    2.00    9.00
  23   2   1    6.80    4.30
  23  -3  -1   16.60    6.50
  23  -3  -1    7.20    5.50
  23   3  -1   -1.20    7.40
  23   3  -1   35.20   16.80
  23   3  -1   19.40    6.00
  22  -3  -1    8.10    5.10
  22  -3  -1   16.60    8.60
  22  -3  -1    2.20    4.80
  22   3  -1   13.00    7.90
  22   3  -1    9.30    5.10
  22   3  -1   16.20    7.40
  21  -3  -1    0.90    5.00
 -21  -3   1   -0.60    1.30
  21  -3  -1    6.40    4.40
  21  -3  -1   -0.60    6.20
 -21  -3   1    0.10    1.90
  21   3  -1   -1.10    7.30
  21   3  -1   -2.80    4.30
  21   3  -1    9.80    6.90
 -20  -3   1    0.40    1.70
  20  -3  -1    6.30    7.10
  20  -3  -1   11.80    4.70
  20  -3  -1    2.30    5.20
  20   3  -1    7.90    7.00
  20   3  -1    7.70    4.70
  20   3  -1    3.60    8.60
  19  -3  -1   -3.10    4.90
 -19  -3   1    3.50    2.60
  19  -3  -1   -5.60    3.60
  19  -3  -1    4.10    6.80
 -19  -3   1   -3.40    2.40
  19   3  -1   -5.00    5.70
  19   3  -1    1.40    6.00
  19   3  -1    6.70    4.70
  18  -3  -1   53.99    8.60
  18  -3  -1   65.09   17.60
  18  -3  -1   85.89    8.40
 -18  -3   1   58.49    6.50
 -18  -3   1   45.20    7.70
  18  -3  -1   49.99    7.80
  18   3  -1   69.89    9.20
  18   3  -1   42.20    8.70
 -18   3   1   63.49    4.60
  18   3  -1   71.99    6.50
 -18   3   1   56.29    4.50
 -18   3   1   51.49    7.60
  17  -3  -1   15.70    5.50
 -17  -3   1    7.90    2.90
 -17  -3   1    6.30    3.20
  17  -3  -1    8.10    4.10
  17  -3  -1   13.00    5.20
  17  -3  -1   11.30    6.50
 -17   3   1    7.70    2.20
 -17   3   1   15.70    2.70
  17   3  -1    5.00    4.50
  17   3  -1   10.20    6.10
  17   3  -1   12.00    3.40
  16  -3  -1   29.10    6.30
  16  -3  -1   40.90    8.30
 -16  -3   1   32.80    4.90
  16  -3  -1   35.00    5.80
 -16  -3   1   31.00    4.40
  16  -3  -1   38.50    7.10
  16   3  -1   43.10    4.80
  16   3  -1   37.50    6.70
  16   3  -1   39.80    7.00
 -16   3   1   22.20    5.20
  16   3  -1   29.20    7.00
 -16   3   1   34.90    5.50
 -16   3   1   40.70    4.10
 -15  -3   1   21.20    4.10
  15  -3  -1   25.10    4.90
  15  -3  -1   18.30    5.00
  15  -3  -1   16.70    4.90
 -15  -3   1   18.70    3.70
 -15  -3   1   17.00    4.00
  15  -3  -1   12.40    6.10
  15   3  -1   18.80    5.90
  15   3  -1   16.80    5.60
 -15   3   1   20.90    3.20
  15   3  -1   22.50    3.70
 -15   3   1   16.80    4.70
  15   3  -1   20.80    5.10
 -15   3   1    7.00    3.90
  14  -3  -1   -0.70    3.70
  14  -3  -1    2.20    5.00
  14  -3  -1    3.90    3.60
 -14  -3   1    3.90    3.10
  14  -3  -1    3.30    3.80
 -14  -3   1    2.40    2.70
 -14  -3   1    1.20    2.20
  14   3  -1    1.40    3.90
 -14   3   1    2.00    2.30
  14   3  -1    2.40    3.50
  14   3  -1    6.00    4.90
 -14   3   1    3.00    3.60
  14   3  -1    3.60    2.60
 -14   3   1    2.80    2.60
 -13  -3   1   -3.20    2.10
  13  -3  -1    4.10    3.20
  13  -3  -1   -1.10    4.60
 -13  -3   1    1.60    2.30
 -13  -3   1    2.60    2.80
  13  -3  -1    2.90    3.50
 -13  -3   1    4.20    3.60
  13  -3  -1    3.00    3.60
  13   3  -1    5.20    4.40
  13   3  -1    1.80    2.30
  13   3  -1    1.50    3.20
 -13   3   1    0.70    2.40
 -13   3   1    4.30    2.20
  13   3  -1   -5.00    3.20
 -13   3   1   -0.20    2.90
  12  -3  -1    0.10    3.60
  12  -3  -1    2.80    2.90
 -12  -3   1    1.50    2.40
 -12  -3   1    0.70    1.70
  12  -3  -1    1.30    3.20
 -12  -3   1    0.40    2.40
  12  -3  -1    1.40    2.90
 -12  -3   1   -8.00    2.90
 -12   3   1    4.10    3.10
 -12   3   1   -1.20    2.20
  12   3  -1    1.00    3.20
  12   3  -1    2.40    1.90
  12   3  -1    0.10    1.10
  12   3  -1    3.00    3.90
  11  -3  -1  167.28   11.50
 -11  -3   1  179.68   12.70
  11  -3  -1  164.88   12.00
 -11  -3   1  173.48   10.70
  11  -3  -1  190.08   11.40
 -11  -3   1  173.98   10.80
 -11  -3   1  174.88   10.10
  11  -3  -1  159.98   12.70
  11   3  -1  173.58    9.80
  11   3  -1  150.68    9.00
  11   3  -1  142.99   11.90
 -11   3   1  177.68   11.50
 -11   3   1  169.48   11.10
 -10  -3   1   -3.70    2.60
 -10  -3   1    3.20    1.80
 -10  -3   1    5.00    2.20
  10  -3  -1    4.30    2.70
  10  -3  -1    2.60    2.60
 -10  -3   1    2.20    2.10
  10  -3  -1    3.50    2.60
 -10   3   1    2.50    2.20
  10   3  -1    2.20    1.70
  10   3  -1    2.40    1.20
  10   3  -1    3.40    3.10
  10   3  -1    2.70    2.60
 -10   3   1    1.00    2.40
   9  -3  -1    6.30    2.90
   9  -3  -1   11.20    3.10
  -9  -3   1   10.30    3.60
   9  -3  -1    7.80    2.80
   9  -3  -1    2.80    3.30
  -9  -3   1   11.70    2.60
  -9  -3   1   10.00    2.00
   9   3  -1    6.40    2.70
  -9   3   1   10.40    2.60
   9   3  -1    8.80    1.80
  -9   3   1   11.50    3.10
   9   3  -1    2.20    2.80
   9   3  -1    7.30    1.50
   8  -3  -1    2.00    1.90
  -8  -3   1   -1.50    1.70
  -8  -3   1    5.80    2.80
  -8  -3   1    2.70    1.40
   8  -3  -1    1.30    2.30
   8  -3  -1    2.00    2.80
  -8  -3   1    1.50    1.90
   8  -3  -1    1.70    2.10
   8   3  -1    3.00    1.20
  -8   3   1    5.20    2.20
   8   3  -1    2.10    1.30
   8   3  -1    2.20    2.20
   8   3  -1    2.50    2.70
  -8   3   1    5.00    2.00
   7  -3  -1   47.60    4.60
  -7  -3   1   40.90    5.00
   7  -3  -1   45.00    4.50
   7  -3  -1   42.30    4.80
  -7  -3   1   48.30    3.40
  -7  -3   1   50.89    4.40
  -7  -3   1   46.60    4.30
   7  -3  -1   51.59    5.50
   7   3  -1   50.69    5.10
   7   3  -1   42.50    4.70
   7   3  -1   43.40    3.40
  -7   3   1   56.19    4.70
  -7   3   1   51.59    4.80
   7   3  -1   45.90    3.30
  -6  -3   1   -1.50    1.60
  -6  -3   1   -0.80    0.80
   6  -3  -1   -1.90    2.00
   6  -3  -1   -0.30    1.50
   6  -3  -1   -1.10    1.60
  -6  -3   1    0.70    1.30
   6  -3  -1    1.10    1.60
  -6  -3   1   -1.40    1.40
  -6   3   1    0.70    1.50
  -6   3   1    0.20    0.50
   6   3  -1   -0.80    1.70
   6   3  -1   -0.20    0.80
   6   3  -1   -0.70    0.90
   6   3  -1    0.70    1.70
  -6   3   1   -0.70    1.60
  -6   3   1    2.50    1.50
   5  -3  -1    2.40    1.80
   5  -3  -1    3.00    1.50
  -5  -3   1    2.50    1.30
  -5  -3   1    5.00    1.80
   5  -3  -1    0.30    2.00
   5  -3  -1    4.80    1.80
  -5  -3   1    4.10    0.80
  -5  -3   1    2.40    1.50
   5   3  -1    6.30    1.90
   5   3  -1    3.30    1.60
   5   3  -1    2.50    1.00
  -5   3   1    2.00    1.30
  -5   3   1    4.00    1.60
   5   3  -1    3.90    0.80
  -5   3   1    3.70    0.70
  -5   3   1    3.70    1.70
  -4  -3   1    5.50    1.60
  -4  -3   1    2.00    1.40
  -4  -3   1    2.40    1.50
  -4  -3   1    4.40    0.70
   4  -3  -1    1.90    1.50
   4  -3  -1    0.50    1.90
   4  -3  -1    1.00    1.70
  -4  -3   1    2.10    1.00
   4  -3  -1    2.20    1.40
   4   3  -1    3.70    1.70
  -4   3   1    3.20    1.40
  -4   3   1    5.10    1.60
   4   3  -1    2.20    1.40
  -4   3   1    1.80    1.40
   4   3  -1    3.10    2.00
   4   3  -1    3.20    1.50
   4   3  -1    2.50    1.10
  -4   3   1    3.70    0.80
   3  -3  -1    2.80    1.60
   3  -3  -1    5.30    1.60
  -3  -3   1    2.50    1.60
  -3  -3   1    4.20    1.50
  -3  -3   1    2.60    1.40
  -3  -3   1    5.10    1.40
  -3  -3   1    1.60    0.40
   3  -3  -1    1.30    1.50
   3   3  -1    1.60    1.80
   3   3  -1    8.90    2.20
  -3   3   1    4.90    1.70
  -3   3   1    1.50    1.50
   3   3  -1    2.60    1.50
  -3   3   1    0.00    1.40
   3   3  -1    2.80    1.30
   3   3  -1    2.60    1.50
  -2  -3   1   -0.80    1.10
  -2  -3   1    1.00    1.30
   2  -3  -1   -1.20    1.00
  -2  -3   1    0.70    1.00
  -2  -3   1    1.80    1.60
   2  -3  -1   -0.80    1.50
  -2  -3   1    1.10    1.00
   2  -3  -1    1.30    1.20
   2  -3  -1   -0.70    1.10
  -2  -3   1    1.90    1.30
   2   3  -1    0.20    1.20
  -2   3   1    1.30    1.10
  -2   3   1    0.00    1.20
   2   3  -1   -0.70    1.40
  -2   3   1   -0.10    1.20
   2   3  -1   -0.70    0.90
   2   3  -1    1.60    1.60
   2   3  -1    2.10    1.00
  -2   3   1    1.70    1.20
  -1  -3   1   78.49    5.00
  -1  -3   1   84.69    5.00
  -1  -3   1   86.69    4.70
  -1  -3   1   80.19    4.70
   1  -3  -1   94.49    5.10
   1  -3  -1   84.29    5.00
  -1  -3   1   76.89    4.90
   1  -3  -1   82.09    5.10
   1  -3  -1   83.59    5.00
  -1  -3   1   84.49    5.00
   1  -3  -1   75.69    4.90
  -1  -3   1   72.99    4.40
   1  -3  -1   90.89    4.80
   1   3  -1   95.79    5.00
   1   3  -1   84.19    4.80
   1   3  -1   83.29    5.00
  -1   3   1   95.59    4.80
  -1   3   1   89.39    5.00
  -1   3   1   78.79    5.00
   1   3  -1   77.09    4.90
   1   3  -1   94.09    4.80
  -1   3   1   84.69    4.90
  -1   3   1   70.39    4.90
   1   3  -1   76.99    5.00
   1   3  -1   69.59    4.40
   0  -3   1    5.80    1.20
   0  -3   1    6.60    1.10
   0  -3  -1    7.70    1.30
   0  -3   1    7.10    1.10
   0  -3  -1    6.40    1.20
   0  -3  -1    5.80    1.20
   0  -3  -1    7.40    0.90
   0  -3   1    7.50    1.40
   0  -3   1    6.90    1.10
   0  -3  -1    7.20    1.20
   0  -3   1    6.30    1.10
   0   3  -1    4.60    1.10
   0   3   1    9.30    1.40
   0   3   1    5.00    1.20
   0   3  -1    7.90    1.20
   0   3  -1    7.40    1.40
   0   3  -1    8.80    1.40
   0   3   1    7.00    0.90
   0   3   1    6.20    1.10
   0   3  -1    7.10    1.10
   0   3  -1    8.30    1.20
   0   3   1    7.10    1.30
   0   3   1    4.70    1.30
  -1  -3  -1   65.19    3.40
  -1  -3  -1   74.09    3.50
   1  -3   1   56.79    4.00
   1  -3   1   59.69    4.10
  -1  -3  -1   60.39    4.10
   1  -3   1   64.59    3.80
   1  -3   1   62.09    4.20
  -1  -3  -1   65.29    4.00
  -1  -3  -1   67.49    4.20
   1  -3   1   64.79    3.90
  -1  -3  -1   56.39    3.80
   1  -3   1   66.79    4.30
   1   3   1   63.39    4.20
   1   3   1   69.79    4.10
  -1   3  -1   70.29    3.80
   1   3   1   61.09    3.40
  -1   3  -1   58.09    4.20
   1   3   1   54.19    3.90
  -1   3  -1   67.99    4.10
  -1   3  -1   64.09    4.10
  -1   3  -1   72.49    3.90
  -1   3  -1   49.60    3.50
  -1   3  -1   55.29    4.20
   2  -3   1   96.29    5.30
   2  -3   1   97.39    6.20
   2  -3   1   84.99    5.70
  -2  -3  -1  104.89    6.10
  -2  -3  -1   88.89    5.40
   2  -3   1   85.39    5.90
   2  -3   1   94.59    5.30
  -2  -3  -1  113.19    5.40
   2  -3   1   84.79    5.70
  -2  -3  -1   91.89    5.80
   2   3   1   84.99    5.40
  -2   3  -1   92.99    5.70
  -2   3  -1   82.79    5.00
   2   3   1   81.69    5.50
  -2   3  -1  104.19    5.40
  -2   3  -1   97.89    5.90
  -2   3  -1  102.29    5.30
   2   3   1   91.29    6.10
   2   3   1  100.79    5.30
   2   3   1   94.49    5.70
  -3  -3  -1   98.29    5.70
   3  -3   1   95.59    6.20
   3  -3   1   90.49    6.10
   3  -3   1   99.59    5.50
  -3  -3  -1  116.79    6.10
  -3  -3  -1  101.79    6.10
   3  -3   1   88.69    5.50
  -3   3  -1  109.09    5.60
  -3   3  -1  111.39    6.40
  -3   3  -1  109.29    6.10
   3   3   1  105.79    5.90
  -3   3  -1  108.29    5.50
   3   3   1   90.69    5.90
   3   3   1   89.79    5.80
   3   3   1  113.19    6.90
  -3   3  -1   92.59    5.40
   3   3   1   87.29    5.10
  -4  -3  -1   16.50    1.90
   4  -3   1   13.90    1.50
  -4  -3  -1   18.50    2.40
   4  -3   1   14.40    2.40
   4  -3   1   12.40    1.70
   4  -3   1   11.50    2.00
  -4  -3  -1   13.00    2.10
   4   3   1   10.90    1.80
  -4   3  -1   16.70    1.60
  -4   3  -1   19.30    2.60
   4   3   1   14.20    2.20
   4   3   1   13.70    2.00
   4   3   1   10.00    2.50
  -4   3  -1   12.10    1.90
   4   3   1   13.10    1.30
  -4   3  -1   16.20    1.60
   5  -3   1   -0.20    1.50
  -5  -3  -1    0.50    1.60
  -5  -3  -1    1.10    1.30
  -5  -3  -1    1.00    1.10
   5  -3   1    0.20    1.20
   5  -3   1    1.00    0.70
   5  -3   1    1.30    1.20
  -5   3  -1    3.60    1.70
  -5   3  -1    1.60    0.90
   5   3   1    0.50    0.70
  -5   3  -1    3.00    1.40
   5   3   1    0.30    1.10
   5   3   1    0.70    1.30
   5   3   1    1.00    1.60
  -5   3  -1    2.50    0.80
   6  -3   1   77.49    7.20
  -6  -3  -1   86.89    5.50
   6  -3   1   92.99    5.00
   6  -3   1   81.39    6.30
  -6  -3  -1  104.59    5.90
  -6  -3  -1  105.79    7.10
  -6  -3  -1   95.29    6.10
   6  -3   1   85.99    6.50
   6  -3   1   83.69    5.90
  -6   3  -1  100.09    6.30
   6   3   1   87.39    6.10
  -6   3  -1   99.19    6.80
   6   3   1   90.19    6.00
   6   3   1   91.59    6.70
  -6   3  -1  101.39    5.40
   6   3   1   94.19    5.40
  -6   3  -1   96.59    5.20
  -7  -3  -1    5.00    2.60
   7  -3   1    0.40    2.60
  -7  -3  -1   -1.50    1.60
   7  -3   1   -1.60    1.70
   7  -3   1    1.40    1.70
   7  -3   1    0.80    2.30
  -7  -3  -1    0.00    1.20
  -7  -3  -1    0.60    1.40
   7   3   1    0.70    1.10
  -7   3  -1    1.10    2.00
  -7   3  -1   -1.70    1.40
   7   3   1   -0.40    1.10
   7   3   1   -0.50    1.70
   7   3   1    0.50    2.20
   8  -3   1   19.10    3.20
   8  -3   1   11.30    4.00
  -8  -3  -1   22.20    3.10
  -8  -3  -1   24.40    2.90
  -8  -3  -1   34.80    3.30
  -8  -3  -1   26.20    4.40
   8  -3   1   19.70    3.40
   8  -3   1   17.20    3.30
   8   3   1   20.70    4.00
   8   3   1   20.20    3.30
  -8   3  -1   26.20    3.80
   8   3   1   27.00    2.70
   8   3   1   27.50    2.60
  -8   3  -1   30.30    3.60
  -9  -3  -1   93.29    6.10
   9  -3   1   74.49    8.10
   9  -3   1   88.09    7.00
   9  -3   1   75.69    6.90
  -9  -3  -1  104.89    8.20
  -9  -3  -1   88.19    5.90
   9  -3   1   77.59    6.50
  -9  -3  -1   78.79    6.10
  -9   3  -1   95.99    6.60
   9   3   1   79.49    7.40
   9   3   1   78.89    6.60
   9   3   1   84.69    5.30
   9   3   1   88.99    5.60
  -9   3  -1   90.39    7.20
  10  -3   1   16.20    4.90
  10  -3   1   25.70    4.00
 -10  -3  -1   25.90    3.50
  10  -3   1   23.10    4.00
 -10  -3  -1   29.80    3.70
  10  -3   1   22.50    4.20
 -10  -3  -1   32.40    5.60
 -10  -3  -1   22.20    3.20
  10   3   1   19.20    2.40
  10   3   1   25.00    4.80
  10   3   1   26.70    3.10
 -10   3  -1   24.40    3.70
 -10   3  -1   40.80    5.10
 -10   3  -1   27.50    2.60
  10   3   1   24.50    3.80
  11  -3   1  153.68   12.80
 -11  -3  -1  147.39    9.80
 -11  -3  -1  157.48   10.00
 -11  -3  -1  160.48    9.70
  11  -3   1  175.38   11.00
  11  -3   1  160.68   11.30
  11  -3   1  155.28   10.90
  11   3   1  154.18   11.80
 -11   3  -1  166.88   10.40
  11   3   1  179.98    9.70
  11   3   1  160.28    8.80
  11   3   1  154.08   10.70
 -11   3  -1  154.28    8.80
 -11   3  -1  165.18   11.20
  12  -3   1  193.18   12.20
  12  -3   1  169.18   14.00
  12  -3   1  180.18   12.10
  12  -3   1  170.98   12.40
 -12  -3  -1  187.58   11.10
 -12  -3  -1  186.38   10.80
 -12   3  -1  196.58   12.50
  12   3   1  180.78    9.50
 -12   3  -1  161.88   11.20
  12   3   1  192.28   10.70
  12   3   1  165.18   13.00
  12   3   1  180.18   12.10
 -12   3  -1  164.78    9.70
 -13  -3  -1    5.00    2.70
  13  -3   1    6.70    3.60
 -13  -3  -1    4.30    2.20
  13  -3   1    5.30    3.40
  13  -3   1    3.10    5.20
  13  -3   1    6.50    3.70
  13   3   1    2.60    2.40
 -13   3  -1    4.30    3.30
 -13   3  -1    2.50    2.40
 -13   3  -1    4.80    1.60
 -13   3  -1    1.20    1.50
  13   3   1    0.70    3.30
  13   3   1    8.00    4.80
  14  -3   1   37.00    5.70
 -14  -3  -1   20.00    3.90
  14  -3   1   21.20    5.10
  14  -3   1   26.60    5.00
 -14  -3  -1   26.60    3.50
  14  -3   1   17.40    6.40
  14   3   1   24.60    4.90
 -14   3  -1   16.80    4.60
 -14   3  -1   20.50    3.70
 -14   3  -1   20.10    2.40
 -14   3  -1   26.60    2.70
  14   3   1   23.90    5.60
  14   3   1   17.80    5.60
  14   3   1   28.10    3.80
 -15  -3  -1   13.50    3.30
  15  -3   1    9.90    4.10
  15  -3   1   16.30    4.50
  15  -3   1    8.20    4.50
  15  -3   1   10.20    6.20
 -15  -3  -1    8.90    2.90
 -15  -3  -1    8.90    2.50
  15   3   1   10.90    3.10
 -15   3  -1    6.00    3.50
 -15   3  -1   11.20    3.20
  15   3   1   12.70    5.60
  15   3   1   13.40    4.30
 -16  -3  -1    4.20    2.40
  16  -3   1    8.60    4.30
  16  -3   1    6.10    4.10
 -16  -3  -1    5.20    2.50
  16  -3   1   -2.20    5.60
 -16  -3  -1    0.80    2.00
  16  -3   1    3.80    3.70
 -16   3  -1    1.40    3.20
  16   3   1   -0.20    3.70
  16   3   1    3.60    5.50
  16   3   1    3.40    2.80
 -16   3  -1    2.70    2.40
  16   3   1    3.50    4.00
 -17  -3  -1   28.10    4.00
  17  -3   1   22.20    7.80
  17  -3   1   35.30    6.20
  17  -3   1   35.80    6.80
 -17  -3  -1   26.00    3.60
  17  -3   1   26.20    5.40
 -17  -3  -1   26.00    3.70
 -17   3  -1   28.70    5.60
  17   3   1   32.40    7.80
 -17   3  -1   23.70    4.00
  17   3   1   33.40    4.40
  17   3   1   39.10    6.50
 -18  -3  -1    3.00    1.80
 -18  -3  -1    3.20    1.90
  18  -3   1   -3.80    3.90
  18  -3   1    2.40    4.30
 -18  -3  -1    1.40    1.90
  18  -3   1    1.70    3.90
  18  -3   1   -5.20    5.80
  18   3   1    7.70    4.30
 -18   3  -1    9.50    4.50
  18   3   1   14.70    6.90
  18   3   1    3.80    7.40
  18   3   1    0.10    2.50
 -19  -3  -1    1.10    1.00
  19  -3   1    7.30    4.90
  19  -3   1    8.70    7.20
  19  -3   1    5.60    5.70
  19   3   1   -1.60    7.10
  19   3   1    7.10    4.80
  19   3   1    5.20    4.30
  19   3   1    1.10    5.90
  20  -3   1    5.60    4.90
  20  -3   1    3.30    4.80
  20  -3   1   -2.00    6.80
  20   3   1    6.50    4.20
  20   3   1   -3.60    6.90
  20   3   1    1.50    3.20
  20   3   1    1.20    6.50
  21  -3   1    4.00    4.70
  21  -3   1    3.50    4.40
  21  -3   1   -1.00    6.90
  21   3   1   10.10    7.50
  21   3   1    7.10    7.50
  21   3   1    5.70    4.60
  21   3   1   11.40    3.30
  22  -3   1   -2.50    4.20
  22  -3   1    3.60    7.80
  22  -3   1   10.90    5.30
  22   3   1   -1.50    6.70
  22   3   1   24.70   10.30
  22   3   1   10.60    4.70
  23  -3   1    5.30    4.50
  23  -3   1    7.50    4.90
  23  -3   1   -5.20    7.30
  23   3   1    3.50    4.20
  23   3   1    7.00    9.60
  23  -4  -1   22.70    5.50
  23  -4  -1   17.20    6.30
  23  -4  -1   25.70   10.90
  23   4  -1   30.00   10.40
  23   4  -1   23.50    6.60
  23   4  -1    8.00    8.20
 -22  -4   1    1.00    1.80
  22  -4  -1   -7.50    6.70
  22  -4  -1    7.20    5.30
  22   4  -1   21.10    8.60
  22   4  -1    5.50    4.60
  22   4  -1    0.20    7.00
  21  -4  -1   17.70    7.80
  21  -4  -1   21.90    7.20
  21  -4  -1   19.00    5.90
  21   4  -1    7.80    8.30
  21   4  -1    8.20    7.30
  21   4  -1   12.10    5.20
  20  -4  -1    9.60    7.80
  20  -4  -1   16.10    6.60
  20  -4  -1   17.70    5.60
  20   4  -1   23.30    6.10
  20   4  -1    5.50    8.60
  20   4  -1   16.50    7.70
  19  -4  -1   22.70   10.50
  19  -4  -1   13.20    5.20
 -19  -4   1   17.20    3.40
 -19  -4   1   14.10    3.80
  19  -4  -1   13.90    7.90
  19   4  -1   18.20    5.80
  19   4  -1   19.40    7.40
  19   4  -1   23.20    9.00
 -18  -4   1    3.80    3.00
  18  -4  -1   11.60    5.30
 -18  -4   1   10.20    3.60
  18  -4  -1   10.90    4.90
 -18  -4   1   10.50    3.20
  18  -4  -1   21.90    5.60
  18  -4  -1    8.20   10.90
  18   4  -1    7.50    6.00
 -18   4   1   10.40    1.90
 -18   4   1   -0.30    3.30
  18   4  -1   13.30    3.20
 -18   4   1   11.90    2.00
  18   4  -1   12.10    5.20
  17  -4  -1   10.00    6.60
  17  -4  -1    3.30    4.50
 -17  -4   1   13.60    4.00
 -17  -4   1   14.70    3.50
  17  -4  -1   18.80    5.90
  17  -4  -1   21.00    5.30
  17   4  -1   11.10    6.00
 -17   4   1    9.50    4.30
 -17   4   1   11.70    2.40
  17   4  -1   18.10    5.40
  17   4  -1   10.40    7.70
  17   4  -1   11.40    3.30
 -17   4   1   11.60    2.50
  16  -4  -1   72.59    8.20
 -16  -4   1   59.59    6.90
  16  -4  -1   56.69    9.80
  16  -4  -1   75.39    9.50
  16  -4  -1   59.09    8.10
  16   4  -1   70.79    6.00
  16   4  -1   75.39    9.00
 -16   4   1   66.89    5.30
  16   4  -1   61.29    9.10
 -16   4   1   63.69    5.30
 -16   4   1   53.59    8.40
  16   4  -1   73.09    9.50
 -16   4   1   59.59    6.70
  15  -4  -1   28.20    5.60
 -15  -4   1   22.10    4.50
  15  -4  -1   23.60    7.10
  15  -4  -1   35.30    6.00
 -15  -4   1   26.20    4.40
  15  -4  -1   36.40    6.60
  15   4  -1   20.60    5.40
  15   4  -1   18.00    6.00
 -15   4   1   22.40    4.40
  15   4  -1   19.80    3.70
 -15   4   1   25.90    5.30
 -15   4   1   30.20    3.70
 -15   4   1   24.20    3.50
  15   4  -1   26.30    5.70
 -14  -4   1  115.39    8.20
  14  -4  -1  128.89   10.10
 -14  -4   1  112.59    8.50
  14  -4  -1  113.99   11.00
 -14  -4   1  117.39    9.20
 -14  -4   1  104.29   11.20
  14  -4  -1  108.49    9.90
  14  -4  -1  133.89   12.60
  14   4  -1  120.99   11.00
  14   4  -1  110.09   10.70
  14   4  -1  121.39    8.00
 -14   4   1  118.09    7.80
 -14   4   1  109.49    9.20
  14   4  -1  126.39   10.70
 -14   4   1  122.89   10.00
  13  -4  -1    4.60    3.30
  13  -4  -1    2.20    3.60
 -13  -4   1    0.50    1.90
 -13  -4   1   -0.90    3.50
  13  -4  -1   -5.20    4.20
  13  -4  -1    1.20    3.10
 -13  -4   1    3.60    3.10
 -13  -4   1    4.20    2.60
  13   4  -1    3.30    1.30
  13   4  -1   -0.90    3.30
  13   4  -1   -1.70    3.50
 -13   4   1   -0.30    2.40
 -13   4   1    3.10    3.30
  13   4  -1    0.60    2.00
 -12  -4   1  490.05   25.20
 -12  -4   1  426.86   24.00
  12  -4  -1  488.65   26.00
  12  -4  -1  464.55   27.30
 -12  -4   1  488.05   25.10
  12  -4  -1  434.06   26.30
 -12  -4   1  506.75   27.50
 -12   4   1  457.45   25.40
  12   4  -1  427.36   26.30
  12   4  -1  448.86   23.40
  12   4  -1  458.25   26.00
 -12   4   1  431.96   25.60
  12   4  -1  499.75   23.90
  11  -4  -1  102.69   10.20
 -11  -4   1  109.19    8.00
  11  -4  -1   92.89    9.10
 -11  -4   1  105.99    7.00
 -11  -4   1  120.59    8.20
  11  -4  -1  117.89    8.60
 -11  -4   1  119.69    9.80
 -11   4   1   87.39    8.30
  11   4  -1  100.79    9.10
  11   4  -1  116.39    6.80
  11   4  -1   98.79   10.00
 -11   4   1  109.59    8.40
  11   4  -1  101.09    6.50
  10  -4  -1  289.17   18.80
 -10  -4   1  341.87   19.60
 -10  -4   1  324.67   17.00
  10  -4  -1  304.77   19.90
 -10  -4   1  347.07   18.20
  10  -4  -1  328.47   18.50
 -10  -4   1  318.87   18.00
  10  -4  -1  317.37   18.30
 -10   4   1  341.87   18.80
  10   4  -1  306.77   18.60
  10   4  -1  306.17   16.80
 -10   4   1  328.87   18.40
  10   4  -1  350.86   16.90
  10   4  -1  308.37   18.80
   9  -4  -1    4.30    3.40
   9  -4  -1   -1.10    1.90
   9  -4  -1   -1.10    2.30
  -9  -4   1   -0.40    2.70
  -9  -4   1   -0.90    1.20
  -9  -4   1   -0.80    1.80
  -9  -4   1    3.60    2.20
   9  -4  -1   -1.20    2.00
   9   4  -1    1.70    2.30
  -9   4   1    2.80    2.20
   9   4  -1    4.50    1.50
   9   4  -1    0.90    2.70
   9   4  -1    0.60    1.20
  -8  -4   1   42.10    4.50
   8  -4  -1   37.80    5.00
   8  -4  -1   44.10    4.80
  -8  -4   1   46.60    5.50
   8  -4  -1   45.60    4.60
   8  -4  -1   38.00    5.70
  -8  -4   1   43.50    3.30
  -8  -4   1   53.79    4.60
   8   4  -1   45.30    3.10
   8   4  -1   32.70    4.60
   8   4  -1   39.50    3.50
  -8   4   1   47.60    4.80
   8   4  -1   25.70    4.10
  -7  -4   1  102.99    6.80
   7  -4  -1   96.59    8.00
  -7  -4   1   96.69    6.70
   7  -4  -1   93.99    6.80
   7  -4  -1   79.69    7.00
   7  -4  -1   82.39    6.60
  -7  -4   1   97.59    7.20
  -7  -4   1   93.69    5.40
  -7   4   1  104.39    5.20
   7   4  -1   88.09    5.80
  -7   4   1   97.39    7.00
   7   4  -1   85.79    6.80
   7   4  -1  100.19    5.40
   7   4  -1  103.49    7.20
  -7   4   1   96.59    6.60
  -7   4   1   98.69    6.90
  -6  -4   1   88.89    6.30
   6  -4  -1   77.09    6.30
   6  -4  -1   71.19    5.70
   6  -4  -1   89.69    6.20
  -6  -4   1   87.39    6.00
  -6  -4   1   80.69    4.60
   6  -4  -1   75.89    6.90
  -6  -4   1   89.69    6.10
  -6   4   1   89.79    6.20
   6   4  -1   74.09    6.00
   6   4  -1   86.29    6.20
  -6   4   1   81.99    5.80
   6   4  -1   88.19    7.20
   6   4  -1   84.09    4.60
  -6   4   1   88.69    6.30
   6   4  -1   79.19    5.30
  -6   4   1   89.49    4.70
   5  -4  -1   52.79    4.30
  -5  -4   1   49.20    2.70
   5  -4  -1   45.70    3.90
  -5  -4   1   49.20    4.10
  -5  -4   1   55.29    4.30
   5  -4  -1   42.90    4.40
   5  -4  -1   44.40    4.70
  -5  -4   1   49.50    4.20
  -5   4   1   54.79    4.30
   5   4  -1   46.90    4.10
   5   4  -1   44.90    3.60
   5   4  -1   49.20    4.20
  -5   4   1   46.50    3.90
  -5   4   1   49.10    3.10
  -5   4   1   54.59    4.40
   5   4  -1   45.70    4.20
  -4  -4   1   -0.10    1.50
   4  -4  -1    0.20    1.20
   4  -4  -1    0.50    1.50
  -4  -4   1    0.80    1.20
   4  -4  -1    0.20    1.40
  -4  -4   1   -0.10    0.10
  -4  -4   1   -0.10    1.20
   4   4  -1   -0.20    1.10
   4   4  -1    1.60    1.40
  -4   4   1   -0.40    1.30
  -4   4   1   -0.10    1.20
   4   4  -1    1.70    1.90
   4   4  -1    0.80    1.50
  -4   4   1    0.70    0.80
  -4   4   1   -0.60    1.10
   4   4  -1    0.40    1.10
  -4   4   1   -0.50    1.30
  -3  -4   1    1.70    1.70
  -3  -4   1    4.60    2.20
   3  -4  -1    3.40    2.30
  -3  -4   1    3.30    1.60
  -3  -4   1    1.80    1.70
   3  -4  -1    3.10    1.90
  -3  -4   1    5.80    1.50
   3  -4  -1    5.90    1.70
   3  -4  -1    5.80    1.70
  -3  -4   1    3.70    1.50
   3   4  -1    4.60    1.80
  -3   4   1    5.80    1.20
  -3   4   1    7.30    2.00
   3   4  -1    6.10    1.60
   3   4  -1    4.00    1.80
  -3   4   1    4.40    1.60
   3   4  -1    4.90    1.50
  -3   4   1    4.00    1.60
   3   4  -1    4.40    2.40
  -3   4   1    7.80    1.80
  -2  -4   1    1.40    1.80
  -2  -4   1    1.70    1.50
  -2  -4   1    1.90    1.90
  -2  -4   1    0.30    1.50
   2  -4  -1    0.40    1.60
   2  -4  -1    0.50    1.50
  -2  -4   1   -0.40    0.70
   2  -4  -1   -0.10    1.60
  -2  -4   1   -0.40    1.40
   2  -4  -1    0.70    1.60
   2  -4  -1   -0.40    2.00
  -2  -4   1   -0.10    1.20
   2   4  -1    0.20    1.20
  -2   4   1    0.50    1.70
   2   4  -1    0.40    1.60
  -2   4   1   -2.30    2.00
   2   4  -1   -1.20    1.60
  -2   4   1    1.30    1.60
  -2   4   1    0.60    1.40
   2   4  -1    1.00    1.40
  -2   4   1   -0.50    1.50
   2   4  -1    0.70    1.80
   2   4  -1   -1.30    1.50
   1  -4  -1  186.68   11.20
  -1  -4   1  223.18   11.40
  -1  -4   1  217.08   11.50
  -1  -4   1  227.08   11.50
   1  -4  -1  204.88   11.30
   1  -4  -1  212.68   11.40
   1  -4  -1  220.58   11.00
  -1  -4   1  189.78   10.70
  -1  -4   1  217.78   11.10
  -1  -4   1  184.98   11.30
  -1  -4   1  223.48   11.10
   1  -4  -1  205.68   11.50
   1  -4  -1  220.38   11.50
   1   4  -1  200.88   11.30
  -1   4   1  227.18   11.40
  -1   4   1  195.58   11.30
   1   4  -1  244.48   11.50
   1   4  -1  191.38   11.40
   1   4  -1  197.58   11.40
  -1   4   1  194.08   11.40
   1   4  -1  237.38   11.20
   1   4  -1  191.98   10.70
  -1   4   1  216.28   11.40
  -1   4   1  193.98   11.50
  -1   4   1  231.38   11.10
   1   4  -1  208.58   11.10
   0  -4  -1   52.49    3.20
   0  -4   1   50.09    3.80
   0  -4   1   48.30    4.10
   0  -4  -1   50.29    4.00
   0  -4   1   44.90    3.90
   0  -4   1   46.70    3.40
   0  -4  -1   51.49    3.90
   0  -4   1   53.59    3.90
   0  -4   1   48.40    3.50
   0  -4  -1   52.59    4.00
   0  -4  -1   47.60    3.70
   0   4  -1   48.70    3.90
   0   4   1   51.99    4.10
   0   4   1   53.09    3.20
   0   4  -1   42.60    3.80
   0   4   1   45.90    3.90
   0   4   1   49.30    3.70
   0   4   1   44.00    3.90
   0   4  -1   41.30    4.00
   0   4  -1   56.69    3.60
   0   4   1   58.99    4.00
   0   4  -1   53.79    3.70
   0   4  -1   45.10    3.40
  -1  -4  -1  136.69    8.00
   1  -4   1  131.69    7.90
  -1  -4  -1  152.98    7.40
  -1  -4  -1  164.08    8.50
   1  -4   1  125.79    8.20
  -1  -4  -1  147.49    7.30
   1  -4   1  147.39    7.80
  -1  -4  -1  149.69    8.20
   1  -4   1  144.99    8.50
   1  -4   1  147.99    8.30
   1  -4   1  145.59    8.00
  -1  -4  -1  148.09    8.30
  -1   4  -1  129.69    8.30
  -1   4  -1  129.49    8.30
  -1   4  -1  124.49    7.60
  -1   4  -1  162.98    7.90
   1   4   1  123.89    8.10
   1   4   1  140.69    7.50
   1   4   1  131.99    8.00
   1   4   1  136.99    7.30
  -1   4  -1  152.68    8.10
   1   4   1  135.49    8.30
  -1   4  -1  154.78    8.00
  -1   4  -1  139.99    8.20
   1   4   1  156.38    8.30
   2  -4   1  251.67   13.90
   2  -4   1  257.47   13.50
   2  -4   1  238.48   13.30
   2  -4   1  238.18   13.90
   2  -4   1  259.97   13.60
  -2  -4  -1  307.67   13.40
  -2  -4  -1  258.87   14.00
   2  -4   1  243.08   14.10
   2  -4   1  272.77   14.30
  -2  -4  -1  302.47   14.50
  -2  -4  -1  243.48   13.60
  -2  -4  -1  272.37   13.80
  -2   4  -1  241.58   13.30
  -2   4  -1  239.48   14.20
   2   4   1  239.88   13.70
   2   4   1  270.87   13.40
  -2   4  -1  279.87   14.00
   2   4   1  253.67   13.80
   2   4   1  267.77   14.30
  -2   4  -1  273.67   14.00
   2   4   1  265.87   12.90
  -2   4  -1  291.97   13.70
  -2   4  -1  302.77   13.70
  -2   4  -1  245.78   14.20
   2   4   1  262.87   14.00
  -3  -4  -1    1.00    1.10
  -3  -4  -1   -0.60    1.50
  -3  -4  -1    0.80    1.10
   3  -4   1    0.60    0.90
   3  -4   1    1.40    1.40
   3  -4   1    0.20    0.90
  -3  -4  -1    1.20    1.10
   3  -4   1    0.00    1.30
  -3  -4  -1    0.30    1.60
   3  -4   1   -1.30    1.40
   3  -4   1   -0.50    0.90
   3   4   1    0.60    0.40
   3   4   1    0.40    1.30
  -3   4  -1   -0.10    0.80
  -3   4  -1    1.10    1.50
  -3   4  -1    2.50    1.50
   3   4   1   -0.20    1.10
  -3   4  -1    0.80    0.90
   3   4   1    0.30    1.30
   3   4   1    3.50    2.00
   3   4   1   -0.90    1.00
  -3   4  -1    0.60    1.00
  -4  -4  -1   47.00    3.70
  -4  -4  -1   44.10    3.80
   4  -4   1   42.50    3.00
   4  -4   1   41.10    3.10
   4  -4   1   39.00    3.80
  -4  -4  -1   43.30    3.40
   4  -4   1   43.30    3.90
   4   4   1   41.20    3.50
   4   4   1   43.00    4.40
  -4   4  -1   49.50    3.20
  -4   4  -1   49.80    4.10
   4   4   1   46.00    3.70
   4   4   1   38.30    2.40
  -4   4  -1   47.70    3.80
   4   4   1   44.00    3.50
  -4   4  -1   42.10    3.10
  -4   4  -1   48.20    3.10
  -5  -4  -1   67.89    4.90
  -5  -4  -1   64.69    4.50
  -5  -4  -1   64.29    5.00
   5  -4   1   65.99    4.00
   5  -4   1   59.09    4.40
   5  -4   1   60.59    5.00
   5  -4   1   62.19    5.20
   5   4   1   59.29    4.70
   5   4   1   63.19    5.90
  -5   4  -1   71.19    4.10
  -5   4  -1   67.39    5.00
   5   4   1   64.59    4.70
  -5   4  -1   73.69    5.40
   5   4   1   62.99    3.60
   5   4   1   65.89    5.00
  -5   4  -1   75.79    4.20
   6  -4   1    4.00    1.60
  -6  -4  -1    4.90    1.60
   6  -4   1    4.00    2.40
   6  -4   1    4.30    2.20
   6  -4   1    3.90    1.00
  -6  -4  -1    6.30    2.00
  -6  -4  -1    3.10    2.10
  -6   4  -1    4.30    1.30
   6   4   1    4.70    2.70
   6   4   1    1.90    1.90
   6   4   1    4.00    1.80
   6   4   1    4.80    1.50
  -6   4  -1    3.30    1.80
  -6   4  -1    3.90    1.10
   6   4   1    2.60    1.60
   6   4   1    3.80    0.90
  -6   4  -1    4.00    2.30
  -7  -4  -1    0.50    0.40
   7  -4   1   -1.00    2.90
  -7  -4  -1    3.40    2.50
  -7  -4  -1    2.50    2.00
   7  -4   1    2.00    2.00
  -7  -4  -1    0.30    1.40
   7  -4   1    1.20    1.70
   7  -4   1   -1.30    2.20
   7   4   1    0.60    1.00
  -7   4  -1   -0.50    1.10
  -7   4  -1    0.20    0.90
   7   4   1    1.40    1.70
   7   4   1    3.60    3.40
   7   4   1   -2.70    2.00
  -7   4  -1   -0.80    1.70
   7   4   1    0.90    1.30
  -7   4  -1    0.10    2.20
   8  -4   1   54.59    4.80
   8  -4   1   48.00    5.40
   8  -4   1   50.29    5.40
  -8  -4  -1   54.39    4.90
  -8  -4  -1   61.99    6.10
   8  -4   1   37.70    5.80
  -8  -4  -1   52.79    4.50
   8   4   1   49.50    5.50
  -8   4  -1   45.80    4.80
   8   4   1   54.49    4.10
   8   4   1   55.19    3.70
   8   4   1   50.29    5.00
  -8   4  -1   61.59    5.70
  -8   4  -1   55.09    3.80
  -9  -4  -1   11.10    3.60
   9  -4   1   10.00    3.00
  -9  -4  -1    8.10    2.50
   9  -4   1   13.90    2.90
   9  -4   1    6.40    2.80
   9  -4   1    6.50    4.00
  -9  -4  -1   10.30    2.40
   9   4   1    8.10    1.90
  -9   4  -1   15.50    3.50
   9   4   1    4.80    3.00
   9   4   1    8.10    2.70
  -9   4  -1   10.10    1.80
  -9   4  -1    9.30    2.60
   9   4   1   10.00    1.80
  10  -4   1  167.98   10.80
  10  -4   1  173.08   11.40
  10  -4   1  157.28   11.30
 -10  -4  -1  164.78   10.50
 -10  -4  -1  177.68   10.10
  10  -4   1  146.39   12.30
 -10  -4  -1  168.18   12.00
  10   4   1  157.88   11.50
  10   4   1  160.48   10.90
 -10   4  -1  178.68   10.80
 -10   4  -1  160.28    9.20
 -10   4  -1  191.68   11.70
  10   4   1  172.18    9.50
  10   4   1  174.78    9.50
 -11  -4  -1   70.59    5.60
  11  -4   1   75.59    7.30
 -11  -4  -1   71.59    6.10
  11  -4   1   56.49    8.20
  11  -4   1   71.79    6.70
  11  -4   1   77.59    7.10
 -11  -4  -1   75.89    8.70
  11   4   1   66.09    4.90
  11   4   1   75.09    5.20
 -11   4  -1   64.79    7.10
  11   4   1   70.99    6.90
  11   4   1   64.79    7.40
 -11   4  -1   73.09    6.40
 -11   4  -1   67.69    4.70
  12  -4   1   49.00    6.70
 -12  -4  -1   71.59    6.30
 -12  -4  -1   70.89    5.60
  12  -4   1   74.59    7.00
  12  -4   1   74.99    7.40
  12  -4   1   63.89    9.00
  12   4   1   74.89    7.20
 -12   4  -1   63.79    4.40
 -12   4  -1   64.09    6.30
  12   4   1   47.00    7.10
  12   4   1   63.59    4.70
 -12   4  -1   73.19    7.40
 -12   4  -1   65.29    4.50
  12   4   1   71.69    5.20
 -13  -4  -1  105.79    7.40
 -13  -4  -1  106.19    8.20
  13  -4   1  101.99   11.20
  13  -4   1  107.19    9.30
  13  -4   1  120.59    9.20
  13  -4   1  110.89    9.80
  13   4   1  124.79    7.40
 -13   4  -1   90.99    8.00
 -13   4  -1   89.89    9.10
  13   4   1  121.09    9.40
  13   4   1  105.49    6.30
 -13   4  -1   99.69    6.10
 -13   4  -1  103.69    6.20
  13   4   1  102.89   10.30
  14  -4   1   35.40    7.70
  14  -4   1   53.19    6.90
  14  -4   1   53.09    7.50
 -14  -4  -1   39.50    4.80
 -14  -4  -1   47.40    4.70
  14  -4   1   44.70    6.30
 -14  -4  -1   44.50    5.40
  14   4   1   53.49    4.90
  14   4   1   43.20    7.40
 -14   4  -1   49.10    7.00
  14   4   1   46.30    3.10
 -14   4  -1   42.30    3.30
 -14   4  -1   43.80    3.20
  14   4   1   57.29    6.90
  14   4   1   45.50    3.20
 -14   4  -1   49.30    5.60
  15  -4   1  157.88   11.50
  15  -4   1  140.89   11.00
 -15  -4  -1  138.89    9.80
  15  -4   1  139.29   11.90
 -15  -4  -1  128.69    8.70
 -15  -4  -1  126.29    9.00
  15  -4   1  158.88   14.40
  15   4   1  136.69   11.80
  15   4   1  139.69    9.00
 -15   4  -1  126.89   11.20
 -15   4  -1  140.19   10.80
  15   4   1  151.28   11.10
  15   4   1  122.79   12.40
  16  -4   1   40.50    6.50
 -16  -4  -1   36.50    4.30
 -16  -4  -1   36.90    5.00
  16  -4   1   44.20    7.00
 -16  -4  -1   45.40    4.60
  16  -4   1   39.80    8.80
  16  -4   1   49.00    6.90
 -16   4  -1   34.30    5.10
  16   4   1   49.70    5.10
  16   4   1   42.00    6.60
  16   4   1   47.20    8.40
  16   4   1   42.20    7.40
 -16   4  -1   44.40    7.10
  16   4   1   41.50    9.60
  17  -4   1   15.70    7.30
 -17  -4  -1   20.70    3.10
  17  -4   1   18.60    5.30
  17  -4   1   20.40    5.50
 -17  -4  -1   20.30    3.00
  17  -4   1   26.40    5.40
 -17  -4  -1   16.70    3.40
  17   4   1   18.40    3.40
 -17   4  -1   20.70    5.50
  17   4   1   23.00    8.40
  17   4   1   11.40    6.30
 -17   4  -1   11.80    3.40
  17   4   1   21.60    5.40
  18  -4   1    1.90    6.70
 -18  -4  -1    7.40    2.00
 -18  -4  -1    4.10    1.90
  18  -4   1    2.40    4.20
  18  -4   1    2.40    4.30
 -18  -4  -1    5.70    2.70
  18  -4   1    7.40    4.80
  18   4   1   10.00    3.00
  18   4   1    5.80    5.80
  18   4   1   -4.00    7.60
  18   4   1    2.00    4.10
  19  -4   1   51.99    7.50
  19  -4   1   59.39    8.20
  19  -4   1   62.69   11.40
  19  -4   1   63.79   14.10
  19   4   1   69.69    5.80
  19   4   1   60.49    8.50
  19   4   1   53.49    9.60
  19   4   1   46.90   11.30
  20  -4   1  104.89   11.50
  20  -4   1   99.09   10.20
  20  -4   1   94.09   13.40
  20   4   1   56.09   12.60
  20   4   1   58.79   10.70
  20   4   1   90.39   10.00
  21  -4   1   10.80    7.30
  21  -4   1   33.80    7.00
  21  -4   1   16.60    6.10
  21   4   1   12.30    8.30
  21   4   1   24.90    5.70
  21   4   1   19.30    8.00
  22  -4   1    9.50    5.10
  22  -4   1    7.00    5.40
  22  -4   1    2.20    7.40
  22   4   1   16.90    4.90
  22   4   1    5.60    8.80
  22   4   1    4.80    6.30
  23  -4   1   -7.90    3.60
  23  -4   1    8.70    5.20
  23  -4   1    7.80    9.00
  23   4   1   10.80    9.30
  23   4   1    7.50    4.70
  23  -5  -1   10.60    5.90
  23  -5  -1    3.30    5.40
  23  -5  -1   16.90    8.30
  23   5  -1   15.30    8.70
  23   5  -1    1.50    4.30
  23   5  -1    9.90    8.80
  22  -5  -1   12.40    6.30
 -22  -5   1   -1.10    2.10
  22  -5  -1    7.20    7.70
  22  -5  -1    2.10    4.60
  22   5  -1    1.90    7.10
  22   5  -1    4.90    4.70
  22   5  -1   10.10    8.40
  21  -5  -1   29.60    7.70
  21  -5  -1   22.70    8.80
  21  -5  -1   27.70    6.60
  21   5  -1   27.10   10.60
  21   5  -1   34.40    7.20
  21   5  -1   37.60    9.20
  20  -5  -1   33.70    7.90
  20  -5  -1   44.30    7.40
  20  -5  -1   43.40   10.70
  20   5  -1   36.10    8.90
  20   5  -1   36.20    7.40
  20   5  -1   21.80    9.50
 -19  -5   1    7.40    2.60
 -19  -5   1    7.90    3.70
  19  -5  -1   -3.20    6.10
  19  -5  -1    4.60    5.00
  19  -5  -1    5.30    5.30
  19  -5  -1    9.90    4.80
  19   5  -1   -0.70    5.60
  19   5  -1    8.30    5.30
  19   5  -1   -5.10    7.10
 -18  -5   1    5.70    3.90
  18  -5  -1    5.30    4.80
 -18  -5   1    3.60    3.00
  18  -5  -1   -6.60    6.20
  18  -5  -1    1.90    4.60
  18  -5  -1    1.00    3.60
 -18  -5   1    5.30    3.50
  18   5  -1    3.10    4.30
  18   5  -1   10.50    6.00
  18   5  -1    2.00    7.30
 -17  -5   1   33.20    4.70
  17  -5  -1   31.10    8.30
 -17  -5   1   32.70    5.50
  17  -5  -1   28.40    6.20
  17  -5  -1   35.30    6.40
  17  -5  -1   38.10    7.40
  17   5  -1   29.50    7.10
 -17   5   1   37.10    3.70
  17   5  -1   22.00    8.50
 -17   5   1   47.30    6.90
  17   5  -1   48.00    7.80
 -17   5   1   38.20    3.60
  16  -5  -1    2.40    5.80
 -16  -5   1    7.90    3.30
  16  -5  -1    9.70    5.10
  16  -5  -1   12.80    4.80
  16  -5  -1    6.90    4.60
 -16  -5   1   11.00    4.00
 -16  -5   1   11.50    4.00
 -16   5   1    6.60    3.90
 -16   5   1   11.00    2.50
  16   5  -1   10.70    5.70
  16   5  -1   10.60    4.60
 -16   5   1    0.10    2.30
 -16   5   1    7.70    2.30
  16   5  -1    4.60    6.70
  15  -5  -1  347.47   22.90
 -15  -5   1  319.47   18.80
  15  -5  -1  342.77   20.20
  15  -5  -1  326.17   21.30
 -15  -5   1  323.87   19.00
 -15  -5   1  312.77   19.20
  15  -5  -1  315.77   20.20
  15   5  -1  332.77   21.40
 -15   5   1  334.47   19.80
  15   5  -1  342.47   21.60
 -15   5   1  317.07   20.40
  15   5  -1  344.57   17.70
  15   5  -1  327.37   23.60
 -15   5   1  331.97   17.60
 -15   5   1  326.57   17.70
  15   5  -1  325.67   16.50
  15   5  -1  307.57   20.40
  14  -5  -1   47.50    7.10
 -14  -5   1   52.59    8.10
  14  -5  -1   55.79    7.10
 -14  -5   1   61.39    5.90
  14  -5  -1   60.09    9.10
 -14  -5   1   45.30    6.00
  14  -5  -1   67.99    7.50
 -14   5   1   57.89    7.00
  14   5  -1   51.29    4.20
  14   5  -1   63.69   10.10
  14   5  -1   52.79    7.40
  14   5  -1   63.29    5.00
  14   5  -1   42.50    7.40
 -14   5   1   51.39    6.90
 -14   5   1   52.19    5.10
  13  -5  -1  142.99   10.40
  13  -5  -1  114.09   11.00
 -13  -5   1  114.19   10.90
 -13  -5   1  126.19    9.70
  13  -5  -1  119.59   11.80
 -13  -5   1  118.49    8.90
  13  -5  -1  140.59   10.40
  13   5  -1  119.39    7.60
  13   5  -1  126.59   12.70
  13   5  -1  133.29   10.60
 -13   5   1  130.39    9.90
 -13   5   1  123.09   10.20
  13   5  -1  128.19   11.00
 -13   5   1  125.89    8.30
  13   5  -1  134.99    7.90
 -12  -5   1    0.90    1.80
 -12  -5   1    3.80    4.00
  12  -5  -1   -0.90    2.80
 -12  -5   1    1.60    2.40
  12  -5  -1    1.80    3.40
 -12  -5   1   -3.90    2.60
  12  -5  -1   -2.80    3.10
  12  -5  -1   -1.10    4.30
  12   5  -1    1.30    3.20
  12   5  -1    1.60    1.80
  12   5  -1   -3.20    3.40
 -12   5   1    0.90    2.70
  12   5  -1   -0.40    1.60
 -12   5   1   -0.20    1.90
 -12   5   1    3.80    3.50
  12   5  -1    0.50    4.40
 -11  -5   1  327.17   18.40
  11  -5  -1  302.67   19.60
 -11  -5   1  326.17   18.60
 -11  -5   1  345.67   20.20
  11  -5  -1  350.16   20.40
  11  -5  -1  339.87   20.80
  11  -5  -1  326.47   19.10
 -11  -5   1  317.07   17.10
  11   5  -1  308.57   21.00
  11   5  -1  324.07   17.30
  11   5  -1  304.77   19.30
 -11   5   1  325.27   19.20
  11   5  -1  344.37   16.90
 -11   5   1  335.87   18.90
 -11   5   1  339.97   17.80
  11   5  -1  297.37   19.00
  10  -5  -1   46.10    6.50
 -10  -5   1   41.60    5.20
  10  -5  -1   48.20    5.20
 -10  -5   1   59.59    6.90
 -10  -5   1   34.90    3.50
 -10  -5   1   50.19    5.00
  10  -5  -1   36.80    5.10
  10   5  -1   44.40    3.50
  10   5  -1   37.00    5.60
  10   5  -1   38.70    5.30
 -10   5   1   58.69    6.00
  10   5  -1   43.70    4.00
 -10   5   1   45.40    5.30
  10   5  -1   42.80    7.00
   9  -5  -1   67.89    5.80
  -9  -5   1   66.09    5.60
   9  -5  -1   51.69    5.80
  -9  -5   1   71.49    6.00
  -9  -5   1   57.89    4.00
   9  -5  -1   58.09    7.30
  -9  -5   1   67.59    6.60
  -9   5   1   64.79    6.30
   9   5  -1   63.99    4.80
   9   5  -1   57.39    6.30
   9   5  -1   46.10    6.80
  -9   5   1   68.39    6.00
   9   5  -1   64.79    6.20
   9   5  -1   65.39    4.10
   8  -5  -1    0.70    2.30
   8  -5  -1    2.00    2.50
   8  -5  -1    4.00    3.20
  -8  -5   1    4.90    2.00
   8  -5  -1    1.50    2.00
  -8  -5   1    0.10    2.30
  -8  -5   1    3.30    1.00
  -8  -5   1    0.50    2.10
   8   5  -1   -1.10    2.10
   8   5  -1    1.20    2.40
  -8   5   1    3.50    2.80
  -8   5   1   10.50    2.70
  -8   5   1    2.40    1.80
   8   5  -1    1.00    1.40
   8   5  -1   -0.70    3.10
  -8   5   1    1.00    0.80
   7  -5  -1    2.20    1.90
  -7  -5   1    4.60    2.40
  -7  -5   1    2.30    2.30
  -7  -5   1    6.10    2.20
   7  -5  -1    0.80    2.80
   7  -5  -1    4.40    2.30
   7  -5  -1    3.70    2.50
[truncated: 9,213,518 more chars]
