# Supplementary material for: Nucleophilic Substitution at a Coordinatively Saturated Five-Membered NHC∙Haloborane Centre
Source: MDPI journal article supplement (doi:10.3390/inorganics10070097), 2022-07-07
Supplement: s1 [file s1 › Cif_6.cif]

data_mo_gk_phbno3_0m
_audit_creation_date               2022-06-17
_audit_creation_method
;
Olex2 1.5
(compiled 2021.08.20 svn.r13c46975 for OlexSys, GUI svn.r6405)
;
_shelx_SHELXL_version_number       '2018/3'
_audit_contact_author_address      ?
_audit_contact_author_email        ?
_audit_contact_author_name         ''
_audit_contact_author_phone        ?
_publ_contact_author_id_orcid      ?
_publ_section_references
;
Dolomanov, O.V., Bourhis, L.J., Gildea, R.J, Howard, J.A.K. & Puschmann, H.
 (2009), J. Appl. Cryst. 42, 339-341.

Sheldrick, G.M. (2015). Acta Cryst. C71, 3-8.
;
_chemical_name_common              ?
_chemical_name_systematic          ?
_chemical_formula_moiety           'C33 H43 B N4 O6'
_chemical_formula_sum              'C33 H43 B N4 O6'
_chemical_formula_weight           602.52
_chemical_melting_point            ?
loop_
  _atom_type_symbol
  _atom_type_description
  _atom_type_scat_dispersion_real
  _atom_type_scat_dispersion_imag
  _atom_type_scat_source
 'C' 'C' 0.0033 0.0016 'International Tables Vol C Tables 4.2.6.8 and 6.1.1.4'
 'H' 'H' 0.0000 0.0000 'International Tables Vol C Tables 4.2.6.8 and 6.1.1.4'
 'B' 'B' 0.0013 0.0007 'International Tables Vol C Tables 4.2.6.8 and 6.1.1.4'
 'N' 'N' 0.0061 0.0033 'International Tables Vol C Tables 4.2.6.8 and 6.1.1.4'
 'O' 'O' 0.0106 0.0060 'International Tables Vol C Tables 4.2.6.8 and 6.1.1.4'

_shelx_space_group_comment
;
The symmetry employed for this shelxl refinement is uniquely defined
by the following loop, which should always be used as a source of
symmetry information in preference to the above space-group names.
They are only intended as comments.
;
_space_group_crystal_system        'monoclinic'
_space_group_IT_number             14
_space_group_name_H-M_alt          'P 1 21/c 1'
_space_group_name_Hall             '-P 2ybc'
loop_
  _space_group_symop_operation_xyz
 'x, y, z'
 '-x, y+1/2, -z+1/2'
 '-x, -y, -z'
 'x, -y-1/2, z-1/2'

_cell_length_a                     10.1256(5)
_cell_length_b                     16.8204(13)
_cell_length_c                     18.9207(16)
_cell_angle_alpha                  90
_cell_angle_beta                   98.178(2)
_cell_angle_gamma                  90
_cell_volume                       3189.7(4)
_cell_formula_units_Z              4
_cell_measurement_reflns_used      2763
_cell_measurement_temperature      160
_cell_measurement_theta_max        25.57
_cell_measurement_theta_min        2.42
_shelx_estimated_absorpt_T_max     0.993
_shelx_estimated_absorpt_T_min     0.984
_exptl_absorpt_coefficient_mu      0.086
_exptl_absorpt_correction_T_max    0.7459
_exptl_absorpt_correction_T_min    0.6825
_exptl_absorpt_correction_type     multi-scan
_exptl_absorpt_process_details    
 'SADABS-2016/2 (Bruker,2016/2) was used for absorption correction. wR2(int) was 0.0898 before and 0.0745 after correction. The Ratio of minimum to maximum transmission is 0.9150. The \l/2 correction factor is Not present.'
_exptl_absorpt_special_details     ?
_exptl_crystal_colour              colourless
_exptl_crystal_colour_primary      colourless
_exptl_crystal_density_diffrn      1.255
_exptl_crystal_density_meas        ?
_exptl_crystal_density_method      ?
_exptl_crystal_description         block
_exptl_crystal_F_000               1288
_exptl_crystal_size_max            0.19
_exptl_crystal_size_mid            0.12
_exptl_crystal_size_min            0.08
_exptl_transmission_factor_max     ?
_exptl_transmission_factor_min     ?
_diffrn_reflns_av_R_equivalents    0.1113
_diffrn_reflns_av_unetI/netI       0.1409
_diffrn_reflns_Laue_measured_fraction_full  0.994
_diffrn_reflns_Laue_measured_fraction_max  0.844
_diffrn_reflns_limit_h_max         13
_diffrn_reflns_limit_h_min         -13
_diffrn_reflns_limit_k_max         21
_diffrn_reflns_limit_k_min         -21
_diffrn_reflns_limit_l_max         26
_diffrn_reflns_limit_l_min         -25
_diffrn_reflns_number              21918
_diffrn_reflns_point_group_measured_fraction_full  0.994
_diffrn_reflns_point_group_measured_fraction_max  0.844
_diffrn_reflns_theta_full          25.242
_diffrn_reflns_theta_max           29.578
_diffrn_reflns_theta_min           2.175
_diffrn_ambient_temperature        160.0
_diffrn_detector_area_resol_mean   ?
_diffrn_measured_fraction_theta_full  0.994
_diffrn_measured_fraction_theta_max  0.844
_diffrn_measurement_device_type    'Bruker D8 VENTURE Kappa Duo PHOTON II CPAD'
_diffrn_measurement_method         '\f and \w scans'
_diffrn_radiation_type             MoK\a
_diffrn_radiation_wavelength       0.71073
_diffrn_source                     ?
_diffrn_standards_number           0
_reflns_Friedel_coverage           0.000
_reflns_Friedel_fraction_full      .
_reflns_Friedel_fraction_max       .
_reflns_number_gt                  3960
_reflns_number_total               7552
_reflns_special_details
;
 Reflections were merged by SHELXL according to the crystal
 class for the calculation of statistics and refinement.
 
 _reflns_Friedel_fraction is defined as the number of unique
 Friedel pairs measured divided by the number that would be
 possible theoretically, ignoring centric projections and
 systematic absences.
;
_reflns_threshold_expression       'I > 2\s(I)'
_computing_cell_refinement         ?
_computing_data_collection         ?
_computing_data_reduction          ?
_computing_molecular_graphics      'Olex2 1.5 (Dolomanov et al., 2009)'
_computing_publication_material    'Olex2 1.5 (Dolomanov et al., 2009)'
_computing_structure_refinement    'ShelXL (Sheldrick, 2015)'
_computing_structure_solution      'SHELXT 2014/5 (Sheldrick, 2014)'
_refine_diff_density_max           0.508
_refine_diff_density_min           -0.760
_refine_diff_density_rms           0.235
_refine_ls_extinction_coef         .
_refine_ls_extinction_method       none
_refine_ls_goodness_of_fit_ref     0.995
_refine_ls_hydrogen_treatment      constr
_refine_ls_matrix_type             full
_refine_ls_number_parameters       405
_refine_ls_number_reflns           7552
_refine_ls_number_restraints       0
_refine_ls_R_factor_all            0.1607
_refine_ls_R_factor_gt             0.0693
_refine_ls_restrained_S_all        0.995
_refine_ls_shift/su_max            0.000
_refine_ls_shift/su_mean           0.000
_refine_ls_structure_factor_coef   Fsqd
_refine_ls_weighting_details      
 'w=1/[\s^2^(Fo^2^)+(0.1090P)^2^] where P=(Fo^2^+2Fc^2^)/3'
_refine_ls_weighting_scheme        calc
_refine_ls_wR_factor_gt            0.1688
_refine_ls_wR_factor_ref           0.2175
_refine_special_details            ?
_olex2_refinement_description
;
1.a Ternary CH refined with riding coordinates:
 C22(H22), C25(H25), C13(H13), C10(H10)
1.b Secondary CH2 refined with riding coordinates:
 C3(H3A,H3B), C2(H2A,H2B)
1.c Aromatic/amide H refined with riding coordinates:
 C33(H33), C32(H32), C31(H31), C8(H8), C7(H7), C6(H6), C29(H29), C30(H30),
 C20(H20), C19(H19), C18(H18)
1.d Idealised Me refined as rotating group:
 C23(H23A,H23B,H23C), C27(H27A,H27B,H27C), C14(H14A,H14B,H14C), C15(H15A,H15B,
 H15C), C11(H11A,H11B,H11C), C12(H12A,H12B,H12C), C24(H24A,H24B,H24C), C26(H26A,
 H26B,H26C)
;
_atom_sites_solution_hydrogens     geom
_atom_sites_solution_primary       ?
_atom_sites_solution_secondary     ?
loop_
  _atom_site_label
  _atom_site_type_symbol
  _atom_site_fract_x
  _atom_site_fract_y
  _atom_site_fract_z
  _atom_site_U_iso_or_equiv
  _atom_site_adp_type
  _atom_site_occupancy
  _atom_site_site_symmetry_order
  _atom_site_calc_flag
  _atom_site_refinement_flags_posn
  _atom_site_refinement_flags_adp
  _atom_site_refinement_flags_occupancy
  _atom_site_disorder_assembly
  _atom_site_disorder_group
 O6 O 0.84561(16) 0.63946(11) 0.69449(10) 0.0260(4) Uani 1 1 d . . . . .
 O4 O 0.71051(19) 0.60593(13) 0.59786(11) 0.0381(5) Uani 1 1 d . . . . .
 O5 O 0.62836(17) 0.70665(12) 0.70921(10) 0.0313(5) Uani 1 1 d . . . . .
 O1 O 0.6264(3) 0.83285(15) 0.72032(17) 0.0760(9) Uani 1 1 d . . . . .
 N1 N 0.69652(19) 0.48875(12) 0.73942(11) 0.0204(5) Uani 1 1 d . . . . .
 N2 N 0.51268(19) 0.55415(12) 0.70352(11) 0.0199(5) Uani 1 1 d . . . . .
 O3 O 0.9079(2) 0.64952(16) 0.59039(12) 0.0531(7) Uani 1 1 d . . . . .
 C23 C 0.6389(3) 0.38942(19) 0.91723(17) 0.0407(8) Uani 1 1 d . . . . .
 H23A H 0.705338 0.367766 0.955055 0.061 Uiso 1 1 calc GR . . . .
 H23B H 0.625897 0.352268 0.876943 0.061 Uiso 1 1 calc GR . . . .
 H23C H 0.554140 0.397049 0.935700 0.061 Uiso 1 1 calc GR . . . .
 C22 C 0.6877(3) 0.46924(17) 0.89228(15) 0.0279(6) Uani 1 1 d . . . . .
 H22 H 0.617033 0.491047 0.855037 0.033 Uiso 1 1 calc R . . . .
 C21 C 0.8144(3) 0.45815(16) 0.85836(14) 0.0250(6) Uani 1 1 d . . . . .
 C16 C 0.8188(2) 0.46684(16) 0.78493(14) 0.0225(6) Uani 1 1 d . . . . .
 C1 C 0.6424(2) 0.56109(16) 0.72925(13) 0.0195(6) Uani 1 1 d . . . . .
 B1 B 0.7320(3) 0.64416(19) 0.73907(17) 0.0237(7) Uani 1 1 d . . . . .
 C28 C 0.8032(2) 0.66732(16) 0.81710(14) 0.0252(6) Uani 1 1 d . . . . .
 C33 C 0.9321(3) 0.64114(17) 0.84473(15) 0.0289(7) Uani 1 1 d . . . . .
 H33 H 0.978512 0.607301 0.816463 0.035 Uiso 1 1 calc R . . . .
 C32 C 0.9935(3) 0.66336(18) 0.91221(15) 0.0319(7) Uani 1 1 d . . . . .
 H32 H 1.080283 0.644269 0.929687 0.038 Uiso 1 1 calc R . . . .
 C31 C 0.9282(3) 0.71325(18) 0.95395(16) 0.0371(8) Uani 1 1 d . . . . .
 H31 H 0.969864 0.728151 1.000237 0.045 Uiso 1 1 calc R . . . .
 C27 C 0.9244(3) 0.36059(18) 0.64624(16) 0.0378(8) Uani 1 1 d . . . . .
 H27A H 0.998849 0.329545 0.671014 0.057 Uiso 1 1 calc GR . . . .
 H27B H 0.928451 0.360191 0.594795 0.057 Uiso 1 1 calc GR . . . .
 H27C H 0.839830 0.337157 0.655361 0.057 Uiso 1 1 calc GR . . . .
 C25 C 0.9339(3) 0.44674(17) 0.67376(15) 0.0276(6) Uani 1 1 d . . . . .
 H25 H 0.853559 0.476276 0.650500 0.033 Uiso 1 1 calc R . . . .
 C17 C 0.9320(2) 0.44734(16) 0.75361(14) 0.0244(6) Uani 1 1 d . . . . .
 C4 C 0.4066(2) 0.61302(15) 0.69185(14) 0.0214(6) Uani 1 1 d . . . . .
 C9 C 0.3512(2) 0.63102(15) 0.62226(15) 0.0237(6) Uani 1 1 d . . . . .
 C8 C 0.2409(3) 0.68239(17) 0.61303(16) 0.0321(7) Uani 1 1 d . . . . .
 H8 H 0.200928 0.695630 0.566008 0.039 Uiso 1 1 calc R . . . .
 C7 C 0.1894(3) 0.71389(18) 0.66985(17) 0.0352(7) Uani 1 1 d . . . . .
 H7 H 0.115152 0.748932 0.662126 0.042 Uiso 1 1 calc R . . . .
 C6 C 0.2456(3) 0.69460(18) 0.73856(17) 0.0336(7) Uani 1 1 d . . . . .
 H6 H 0.208466 0.716271 0.777712 0.040 Uiso 1 1 calc R . . . .
 C5 C 0.3558(2) 0.64400(16) 0.75186(15) 0.0250(6) Uani 1 1 d . . . . .
 C13 C 0.4114(3) 0.62236(17) 0.82798(14) 0.0277(7) Uani 1 1 d . . . . .
 H13 H 0.508002 0.609141 0.829213 0.033 Uiso 1 1 calc R . . . .
 C14 C 0.4015(3) 0.69051(19) 0.88075(16) 0.0395(8) Uani 1 1 d . . . . .
 H14A H 0.432434 0.739933 0.861119 0.059 Uiso 1 1 calc GR . . . .
 H14B H 0.457172 0.678422 0.926184 0.059 Uiso 1 1 calc GR . . . .
 H14C H 0.308488 0.696745 0.888685 0.059 Uiso 1 1 calc GR . . . .
 C15 C 0.3417(3) 0.5489(2) 0.85253(17) 0.0407(8) Uani 1 1 d . . . . .
 H15A H 0.246193 0.559835 0.850672 0.061 Uiso 1 1 calc GR . . . .
 H15B H 0.380109 0.535661 0.901610 0.061 Uiso 1 1 calc GR . . . .
 H15C H 0.354034 0.504047 0.821054 0.061 Uiso 1 1 calc GR . . . .
 C10 C 0.4033(3) 0.59742(18) 0.55731(15) 0.0299(7) Uani 1 1 d . . . . .
 H10 H 0.484611 0.565165 0.574242 0.036 Uiso 1 1 calc R . . . .
 C11 C 0.4438(4) 0.6641(2) 0.51005(19) 0.0539(10) Uani 1 1 d . . . . .
 H11A H 0.364714 0.694935 0.490776 0.081 Uiso 1 1 calc GR . . . .
 H11B H 0.484309 0.641171 0.470621 0.081 Uiso 1 1 calc GR . . . .
 H11C H 0.508420 0.698981 0.538408 0.081 Uiso 1 1 calc GR . . . .
 C12 C 0.3014(3) 0.5430(2) 0.51460(17) 0.0471(9) Uani 1 1 d . . . . .
 H12A H 0.281204 0.498434 0.544673 0.071 Uiso 1 1 calc GR . . . .
 H12B H 0.338002 0.522542 0.472908 0.071 Uiso 1 1 calc GR . . . .
 H12C H 0.219563 0.572917 0.498709 0.071 Uiso 1 1 calc GR . . . .
 C3 C 0.4723(2) 0.46976(16) 0.69232(15) 0.0261(6) Uani 1 1 d . . . . .
 H3A H 0.437940 0.459326 0.641535 0.031 Uiso 1 1 calc R . . . .
 H3B H 0.402983 0.455141 0.721976 0.031 Uiso 1 1 calc R . . . .
 C2 C 0.6005(2) 0.42459(17) 0.71541(16) 0.0299(7) Uani 1 1 d . . . . .
 H2A H 0.590727 0.387351 0.754852 0.036 Uiso 1 1 calc R . . . .
 H2B H 0.628462 0.394506 0.675082 0.036 Uiso 1 1 calc R . . . .
 C29 C 0.7419(3) 0.71866(17) 0.86086(16) 0.0321(7) Uani 1 1 d . . . . .
 H29 H 0.655481 0.738664 0.843766 0.039 Uiso 1 1 calc R . . . .
 C30 C 0.8025(3) 0.74135(18) 0.92817(16) 0.0372(7) Uani 1 1 d . . . . .
 H30 H 0.757736 0.776096 0.956441 0.045 Uiso 1 1 calc R . . . .
 N3 N 0.8185(2) 0.63143(15) 0.62337(14) 0.0337(6) Uani 1 1 d . . . . .
 N4 N 0.6681(3) 0.77713(16) 0.69389(16) 0.0422(7) Uani 1 1 d . . . . .
 O2 O 0.7372(3) 0.78409(16) 0.6448(2) 0.0975(12) Uani 1 1 d . . . . .
 C24 C 0.7081(3) 0.5282(2) 0.95459(16) 0.0417(8) Uani 1 1 d . . . . .
 H24A H 0.623453 0.536053 0.973115 0.062 Uiso 1 1 calc GR . . . .
 H24B H 0.739027 0.579205 0.937933 0.062 Uiso 1 1 calc GR . . . .
 H24C H 0.774857 0.507177 0.992560 0.062 Uiso 1 1 calc GR . . . .
 C20 C 0.9308(3) 0.43427(17) 0.90087(15) 0.0330(7) Uani 1 1 d . . . . .
 H20 H 0.931805 0.429443 0.950966 0.040 Uiso 1 1 calc R . . . .
 C19 C 1.0446(3) 0.41749(18) 0.87195(16) 0.0366(8) Uani 1 1 d . . . . .
 H19 H 1.123433 0.401878 0.902121 0.044 Uiso 1 1 calc R . . . .
 C18 C 1.0448(3) 0.42321(18) 0.79939(16) 0.0333(7) Uani 1 1 d . . . . .
 H18 H 1.123830 0.410384 0.780104 0.040 Uiso 1 1 calc R . . . .
 C26 C 1.0581(3) 0.4872(2) 0.65276(19) 0.0464(9) Uani 1 1 d . . . . .
 H26A H 1.067922 0.540184 0.674506 0.070 Uiso 1 1 calc GR . . . .
 H26B H 1.048694 0.492273 0.600682 0.070 Uiso 1 1 calc GR . . . .
 H26C H 1.137126 0.455202 0.669651 0.070 Uiso 1 1 calc GR . . . .

loop_
  _atom_site_aniso_label
  _atom_site_aniso_U_11
  _atom_site_aniso_U_22
  _atom_site_aniso_U_33
  _atom_site_aniso_U_23
  _atom_site_aniso_U_13
  _atom_site_aniso_U_12
 O6 0.0200(9) 0.0361(12) 0.0218(11) 0.0027(8) 0.0030(7) -0.0049(8)
 O4 0.0351(11) 0.0499(14) 0.0290(12) -0.0043(10) 0.0032(9) -0.0111(10)
 O5 0.0216(9) 0.0391(13) 0.0323(12) 0.0023(9) 0.0005(8) -0.0089(9)
 O1 0.094(2) 0.0290(15) 0.115(3) 0.0000(15) 0.0501(19) 0.0151(14)
 N1 0.0178(10) 0.0191(12) 0.0234(12) -0.0009(9) 0.0005(9) -0.0015(9)
 N2 0.0183(10) 0.0184(12) 0.0227(12) -0.0006(9) 0.0020(9) -0.0015(9)
 O3 0.0378(12) 0.0877(19) 0.0363(14) 0.0116(13) 0.0138(10) -0.0150(12)
 C23 0.0459(18) 0.0386(19) 0.040(2) 0.0058(15) 0.0137(15) -0.0014(15)
 C22 0.0320(14) 0.0294(16) 0.0226(15) 0.0040(12) 0.0050(12) 0.0019(12)
 C21 0.0262(14) 0.0238(15) 0.0244(15) 0.0007(12) 0.0015(11) 0.0020(11)
 C16 0.0206(13) 0.0220(15) 0.0238(15) -0.0019(11) -0.0001(11) 0.0015(11)
 C1 0.0199(13) 0.0256(15) 0.0136(13) 0.0004(11) 0.0041(10) -0.0012(11)
 B1 0.0201(14) 0.0248(17) 0.0264(17) 0.0049(14) 0.0040(12) 0.0003(12)
 C28 0.0262(14) 0.0230(15) 0.0266(15) -0.0010(12) 0.0041(11) -0.0086(11)
 C33 0.0262(14) 0.0283(16) 0.0323(17) -0.0004(13) 0.0051(12) -0.0047(12)
 C32 0.0306(15) 0.0374(18) 0.0260(16) 0.0049(13) -0.0018(12) -0.0088(13)
 C31 0.0459(18) 0.0400(19) 0.0239(16) -0.0022(14) -0.0001(14) -0.0145(15)
 C27 0.0442(17) 0.0360(18) 0.0331(18) -0.0034(14) 0.0051(14) 0.0084(14)
 C25 0.0225(13) 0.0332(17) 0.0277(16) 0.0007(13) 0.0050(11) 0.0035(12)
 C17 0.0222(13) 0.0232(15) 0.0272(15) -0.0017(12) 0.0014(11) -0.0012(11)
 C4 0.0165(12) 0.0193(14) 0.0285(15) -0.0006(12) 0.0032(11) -0.0017(10)
 C9 0.0202(13) 0.0210(15) 0.0288(16) 0.0013(12) 0.0001(11) -0.0021(10)
 C8 0.0293(15) 0.0297(17) 0.0341(18) 0.0056(14) -0.0070(13) 0.0017(12)
 C7 0.0252(14) 0.0286(17) 0.051(2) -0.0016(15) 0.0024(14) 0.0059(12)
 C6 0.0283(14) 0.0316(17) 0.0424(19) -0.0073(14) 0.0103(13) 0.0020(13)
 C5 0.0233(13) 0.0232(15) 0.0285(16) -0.0040(12) 0.0041(11) -0.0031(11)
 C13 0.0268(13) 0.0331(17) 0.0241(15) -0.0044(12) 0.0071(11) 0.0009(12)
 C14 0.0381(16) 0.050(2) 0.0314(18) -0.0113(15) 0.0083(13) 0.0006(15)
 C15 0.0469(18) 0.044(2) 0.0328(18) 0.0032(15) 0.0118(15) -0.0089(15)
 C10 0.0302(14) 0.0368(17) 0.0218(15) 0.0037(13) 0.0005(12) 0.0052(13)
 C11 0.058(2) 0.066(3) 0.040(2) 0.0220(18) 0.0130(17) 0.0099(19)
 C12 0.0468(18) 0.058(2) 0.0327(19) -0.0105(17) -0.0065(15) 0.0069(16)
 C3 0.0239(13) 0.0242(15) 0.0294(16) -0.0013(12) 0.0017(11) -0.0028(11)
 C2 0.0258(14) 0.0263(16) 0.0357(18) -0.0048(13) -0.0018(12) -0.0006(12)
 C29 0.0287(14) 0.0300(17) 0.0381(19) -0.0037(14) 0.0066(13) -0.0011(12)
 C30 0.0457(18) 0.0335(18) 0.0337(18) -0.0106(14) 0.0102(14) -0.0070(14)
 N3 0.0291(13) 0.0391(16) 0.0336(15) 0.0047(12) 0.0070(11) -0.0024(11)
 N4 0.0390(15) 0.0294(16) 0.0550(19) -0.0106(14) -0.0044(13) 0.0108(13)
 O2 0.137(3) 0.0426(18) 0.134(3) 0.0062(18) 0.091(3) -0.0068(17)
 C24 0.056(2) 0.042(2) 0.0302(18) 0.0024(15) 0.0163(15) 0.0011(16)
 C20 0.0397(17) 0.0367(18) 0.0210(15) 0.0018(13) -0.0012(13) 0.0040(14)
 C19 0.0284(15) 0.044(2) 0.0338(18) 0.0035(15) -0.0082(13) 0.0070(13)
 C18 0.0219(14) 0.0387(18) 0.0381(19) -0.0022(14) 0.0002(12) 0.0036(12)
 C26 0.0347(17) 0.060(2) 0.047(2) 0.0119(18) 0.0124(15) -0.0034(16)

_geom_special_details
;
 All esds (except the esd in the dihedral angle between two l.s. planes)
 are estimated using the full covariance matrix.  The cell esds are taken
 into account individually in the estimation of esds in distances, angles
 and torsion angles; correlations between esds in cell parameters are only
 used when they are defined by crystal symmetry.  An approximate (isotropic)
 treatment of cell esds is used for estimating esds involving l.s. planes.
;
loop_
  _geom_bond_atom_site_label_1
  _geom_bond_atom_site_label_2
  _geom_bond_distance
  _geom_bond_site_symmetry_2
  _geom_bond_publ_flag
 O6 B1 1.522(3) . ?
 O6 N3 1.341(3) . ?
 O4 N3 1.209(3) . ?
 O5 B1 1.535(4) . ?
 O5 N4 1.298(3) . ?
 O1 N4 1.169(3) . ?
 N1 C16 1.452(3) . ?
 N1 C1 1.337(3) . ?
 N1 C2 1.480(3) . ?
 N2 C1 1.340(3) . ?
 N2 C4 1.455(3) . ?
 N2 C3 1.484(3) . ?
 O3 N3 1.209(3) . ?
 C23 H23A 0.9800 . ?
 C23 H23B 0.9800 . ?
 C23 H23C 0.9800 . ?
 C23 C22 1.529(4) . ?
 C22 H22 1.0000 . ?
 C22 C21 1.525(4) . ?
 C22 C24 1.532(4) . ?
 C21 C16 1.404(4) . ?
 C21 C20 1.389(4) . ?
 C16 C17 1.402(4) . ?
 C1 B1 1.662(4) . ?
 B1 C28 1.596(4) . ?
 C28 C33 1.406(4) . ?
 C28 C29 1.401(4) . ?
 C33 H33 0.9500 . ?
 C33 C32 1.389(4) . ?
 C32 H32 0.9500 . ?
 C32 C31 1.383(4) . ?
 C31 H31 0.9500 . ?
 C31 C30 1.380(4) . ?
 C27 H27A 0.9800 . ?
 C27 H27B 0.9800 . ?
 C27 H27C 0.9800 . ?
 C27 C25 1.538(4) . ?
 C25 H25 1.0000 . ?
 C25 C17 1.514(4) . ?
 C25 C26 1.532(4) . ?
 C17 C18 1.392(4) . ?
 C4 C9 1.389(4) . ?
 C4 C5 1.411(4) . ?
 C9 C8 1.403(4) . ?
 C9 C10 1.514(4) . ?
 C8 H8 0.9500 . ?
 C8 C7 1.367(4) . ?
 C7 H7 0.9500 . ?
 C7 C6 1.382(4) . ?
 C6 H6 0.9500 . ?
 C6 C5 1.397(4) . ?
 C5 C13 1.514(4) . ?
 C13 H13 1.0000 . ?
 C13 C14 1.533(4) . ?
 C13 C15 1.528(4) . ?
 C14 H14A 0.9800 . ?
 C14 H14B 0.9800 . ?
 C14 H14C 0.9800 . ?
 C15 H15A 0.9800 . ?
 C15 H15B 0.9800 . ?
 C15 H15C 0.9800 . ?
 C10 H10 1.0000 . ?
 C10 C11 1.527(4) . ?
 C10 C12 1.522(4) . ?
 C11 H11A 0.9800 . ?
 C11 H11B 0.9800 . ?
 C11 H11C 0.9800 . ?
 C12 H12A 0.9800 . ?
 C12 H12B 0.9800 . ?
 C12 H12C 0.9800 . ?
 C3 H3A 0.9900 . ?
 C3 H3B 0.9900 . ?
 C3 C2 1.514(4) . ?
 C2 H2A 0.9900 . ?
 C2 H2B 0.9900 . ?
 C29 H29 0.9500 . ?
 C29 C30 1.387(4) . ?
 C30 H30 0.9500 . ?
 N4 O2 1.245(4) . ?
 C24 H24A 0.9800 . ?
 C24 H24B 0.9800 . ?
 C24 H24C 0.9800 . ?
 C20 H20 0.9500 . ?
 C20 C19 1.373(4) . ?
 C19 H19 0.9500 . ?
 C19 C18 1.377(4) . ?
 C18 H18 0.9500 . ?
 C26 H26A 0.9800 . ?
 C26 H26B 0.9800 . ?
 C26 H26C 0.9800 . ?

loop_
  _geom_angle_atom_site_label_1
  _geom_angle_atom_site_label_2
  _geom_angle_atom_site_label_3
  _geom_angle
  _geom_angle_site_symmetry_1
  _geom_angle_site_symmetry_3
  _geom_angle_publ_flag
 N3 O6 B1 119.87(19) . . ?
 N4 O5 B1 119.4(2) . . ?
 C16 N1 C2 117.7(2) . . ?
 C1 N1 C16 127.9(2) . . ?
 C1 N1 C2 112.4(2) . . ?
 C1 N2 C4 131.4(2) . . ?
 C1 N2 C3 111.8(2) . . ?
 C4 N2 C3 116.55(19) . . ?
 H23A C23 H23B 109.5 . . ?
 H23A C23 H23C 109.5 . . ?
 H23B C23 H23C 109.5 . . ?
 C22 C23 H23A 109.5 . . ?
 C22 C23 H23B 109.5 . . ?
 C22 C23 H23C 109.5 . . ?
 C23 C22 H22 108.0 . . ?
 C23 C22 C24 110.2(2) . . ?
 C21 C22 C23 110.5(2) . . ?
 C21 C22 H22 108.0 . . ?
 C21 C22 C24 111.9(2) . . ?
 C24 C22 H22 108.0 . . ?
 C16 C21 C22 123.4(2) . . ?
 C20 C21 C22 119.2(2) . . ?
 C20 C21 C16 117.4(2) . . ?
 C21 C16 N1 118.0(2) . . ?
 C17 C16 N1 119.2(2) . . ?
 C17 C16 C21 122.5(2) . . ?
 N1 C1 N2 109.5(2) . . ?
 N1 C1 B1 122.9(2) . . ?
 N2 C1 B1 127.3(2) . . ?
 O6 B1 O5 111.3(2) . . ?
 O6 B1 C1 109.7(2) . . ?
 O6 B1 C28 104.3(2) . . ?
 O5 B1 C1 101.59(19) . . ?
 O5 B1 C28 111.6(2) . . ?
 C28 B1 C1 118.4(2) . . ?
 C33 C28 B1 122.7(2) . . ?
 C29 C28 B1 121.1(2) . . ?
 C29 C28 C33 116.1(3) . . ?
 C28 C33 H33 119.1 . . ?
 C32 C33 C28 121.9(3) . . ?
 C32 C33 H33 119.1 . . ?
 C33 C32 H32 120.0 . . ?
 C31 C32 C33 120.0(3) . . ?
 C31 C32 H32 120.0 . . ?
 C32 C31 H31 120.1 . . ?
 C30 C31 C32 119.8(3) . . ?
 C30 C31 H31 120.1 . . ?
 H27A C27 H27B 109.5 . . ?
 H27A C27 H27C 109.5 . . ?
 H27B C27 H27C 109.5 . . ?
 C25 C27 H27A 109.5 . . ?
 C25 C27 H27B 109.5 . . ?
 C25 C27 H27C 109.5 . . ?
 C27 C25 H25 108.1 . . ?
 C17 C25 C27 109.6(2) . . ?
 C17 C25 H25 108.1 . . ?
 C17 C25 C26 112.5(2) . . ?
 C26 C25 C27 110.2(2) . . ?
 C26 C25 H25 108.1 . . ?
 C16 C17 C25 123.4(2) . . ?
 C18 C17 C16 116.9(3) . . ?
 C18 C17 C25 119.6(2) . . ?
 C9 C4 N2 118.8(2) . . ?
 C9 C4 C5 122.6(2) . . ?
 C5 C4 N2 118.4(2) . . ?
 C4 C9 C8 117.3(2) . . ?
 C4 C9 C10 123.2(2) . . ?
 C8 C9 C10 119.5(2) . . ?
 C9 C8 H8 119.1 . . ?
 C7 C8 C9 121.8(3) . . ?
 C7 C8 H8 119.1 . . ?
 C8 C7 H7 120.1 . . ?
 C8 C7 C6 119.8(3) . . ?
 C6 C7 H7 120.1 . . ?
 C7 C6 H6 119.2 . . ?
 C7 C6 C5 121.6(3) . . ?
 C5 C6 H6 119.2 . . ?
 C4 C5 C13 123.2(2) . . ?
 C6 C5 C4 116.9(3) . . ?
 C6 C5 C13 119.8(2) . . ?
 C5 C13 H13 107.8 . . ?
 C5 C13 C14 112.9(2) . . ?
 C5 C13 C15 111.0(2) . . ?
 C14 C13 H13 107.8 . . ?
 C15 C13 H13 107.8 . . ?
 C15 C13 C14 109.3(2) . . ?
 C13 C14 H14A 109.5 . . ?
 C13 C14 H14B 109.5 . . ?
 C13 C14 H14C 109.5 . . ?
 H14A C14 H14B 109.5 . . ?
 H14A C14 H14C 109.5 . . ?
 H14B C14 H14C 109.5 . . ?
 C13 C15 H15A 109.5 . . ?
 C13 C15 H15B 109.5 . . ?
 C13 C15 H15C 109.5 . . ?
 H15A C15 H15B 109.5 . . ?
 H15A C15 H15C 109.5 . . ?
 H15B C15 H15C 109.5 . . ?
 C9 C10 H10 108.0 . . ?
 C9 C10 C11 110.8(3) . . ?
 C9 C10 C12 111.6(2) . . ?
 C11 C10 H10 108.0 . . ?
 C12 C10 H10 108.0 . . ?
 C12 C10 C11 110.4(3) . . ?
 C10 C11 H11A 109.5 . . ?
 C10 C11 H11B 109.5 . . ?
 C10 C11 H11C 109.5 . . ?
 H11A C11 H11B 109.5 . . ?
 H11A C11 H11C 109.5 . . ?
 H11B C11 H11C 109.5 . . ?
 C10 C12 H12A 109.5 . . ?
 C10 C12 H12B 109.5 . . ?
 C10 C12 H12C 109.5 . . ?
 H12A C12 H12B 109.5 . . ?
 H12A C12 H12C 109.5 . . ?
 H12B C12 H12C 109.5 . . ?
 N2 C3 H3A 111.1 . . ?
 N2 C3 H3B 111.1 . . ?
 N2 C3 C2 103.4(2) . . ?
 H3A C3 H3B 109.1 . . ?
 C2 C3 H3A 111.1 . . ?
 C2 C3 H3B 111.1 . . ?
 N1 C2 C3 102.8(2) . . ?
 N1 C2 H2A 111.2 . . ?
 N1 C2 H2B 111.2 . . ?
 C3 C2 H2A 111.2 . . ?
 C3 C2 H2B 111.2 . . ?
 H2A C2 H2B 109.1 . . ?
 C28 C29 H29 118.8 . . ?
 C30 C29 C28 122.5(3) . . ?
 C30 C29 H29 118.8 . . ?
 C31 C30 C29 119.7(3) . . ?
 C31 C30 H30 120.1 . . ?
 C29 C30 H30 120.1 . . ?
 O4 N3 O6 118.7(2) . . ?
 O4 N3 O3 125.7(3) . . ?
 O3 N3 O6 115.5(2) . . ?
 O1 N4 O5 119.6(3) . . ?
 O1 N4 O2 121.3(3) . . ?
 O2 N4 O5 118.5(3) . . ?
 C22 C24 H24A 109.5 . . ?
 C22 C24 H24B 109.5 . . ?
 C22 C24 H24C 109.5 . . ?
 H24A C24 H24B 109.5 . . ?
 H24A C24 H24C 109.5 . . ?
 H24B C24 H24C 109.5 . . ?
 C21 C20 H20 119.3 . . ?
 C19 C20 C21 121.3(3) . . ?
 C19 C20 H20 119.3 . . ?
 C20 C19 H19 119.9 . . ?
 C20 C19 C18 120.2(3) . . ?
 C18 C19 H19 119.9 . . ?
 C17 C18 H18 119.2 . . ?
 C19 C18 C17 121.5(3) . . ?
 C19 C18 H18 119.2 . . ?
 C25 C26 H26A 109.5 . . ?
 C25 C26 H26B 109.5 . . ?
 C25 C26 H26C 109.5 . . ?
 H26A C26 H26B 109.5 . . ?
 H26A C26 H26C 109.5 . . ?
 H26B C26 H26C 109.5 . . ?

loop_
  _geom_torsion_atom_site_label_1
  _geom_torsion_atom_site_label_2
  _geom_torsion_atom_site_label_3
  _geom_torsion_atom_site_label_4
  _geom_torsion
  _geom_torsion_site_symmetry_1
  _geom_torsion_site_symmetry_2
  _geom_torsion_site_symmetry_3
  _geom_torsion_site_symmetry_4
  _geom_torsion_publ_flag
 O6 B1 C28 C33 -33.6(3) . . . . ?
 O6 B1 C28 C29 143.3(2) . . . . ?
 O5 B1 C28 C33 -153.9(2) . . . . ?
 O5 B1 C28 C29 23.0(3) . . . . ?
 N1 C16 C17 C25 -0.8(4) . . . . ?
 N1 C16 C17 C18 -177.1(2) . . . . ?
 N1 C1 B1 O6 52.8(3) . . . . ?
 N1 C1 B1 O5 170.7(2) . . . . ?
 N1 C1 B1 C28 -66.7(3) . . . . ?
 N2 C1 B1 O6 -119.5(3) . . . . ?
 N2 C1 B1 O5 -1.7(3) . . . . ?
 N2 C1 B1 C28 120.9(3) . . . . ?
 N2 C4 C9 C8 174.2(2) . . . . ?
 N2 C4 C9 C10 -5.2(4) . . . . ?
 N2 C4 C5 C6 -174.1(2) . . . . ?
 N2 C4 C5 C13 3.5(4) . . . . ?
 N2 C3 C2 N1 2.1(3) . . . . ?
 C23 C22 C21 C16 109.5(3) . . . . ?
 C23 C22 C21 C20 -67.1(3) . . . . ?
 C22 C21 C16 N1 1.0(4) . . . . ?
 C22 C21 C16 C17 -172.3(3) . . . . ?
 C22 C21 C20 C19 174.9(3) . . . . ?
 C21 C16 C17 C25 172.4(3) . . . . ?
 C21 C16 C17 C18 -3.9(4) . . . . ?
 C21 C20 C19 C18 -0.8(5) . . . . ?
 C16 N1 C1 N2 -159.8(2) . . . . ?
 C16 N1 C1 B1 26.7(4) . . . . ?
 C16 N1 C2 C3 161.7(2) . . . . ?
 C16 C21 C20 C19 -1.9(4) . . . . ?
 C16 C17 C18 C19 1.0(4) . . . . ?
 C1 N1 C16 C21 80.0(3) . . . . ?
 C1 N1 C16 C17 -106.5(3) . . . . ?
 C1 N1 C2 C3 -3.5(3) . . . . ?
 C1 N2 C4 C9 112.3(3) . . . . ?
 C1 N2 C4 C5 -73.5(3) . . . . ?
 C1 N2 C3 C2 -0.2(3) . . . . ?
 C1 B1 C28 C33 88.7(3) . . . . ?
 C1 B1 C28 C29 -94.4(3) . . . . ?
 B1 O6 N3 O4 -20.7(4) . . . . ?
 B1 O6 N3 O3 160.7(2) . . . . ?
 B1 O5 N4 O1 -123.5(3) . . . . ?
 B1 O5 N4 O2 65.1(4) . . . . ?
 B1 C28 C33 C32 178.6(3) . . . . ?
 B1 C28 C29 C30 -178.4(3) . . . . ?
 C28 C33 C32 C31 -0.7(4) . . . . ?
 C28 C29 C30 C31 0.3(5) . . . . ?
 C33 C28 C29 C30 -1.3(4) . . . . ?
 C33 C32 C31 C30 -0.5(4) . . . . ?
 C32 C31 C30 C29 0.7(4) . . . . ?
 C27 C25 C17 C16 -102.0(3) . . . . ?
 C27 C25 C17 C18 74.2(3) . . . . ?
 C25 C17 C18 C19 -175.4(3) . . . . ?
 C4 N2 C1 N1 171.4(2) . . . . ?
 C4 N2 C1 B1 -15.5(4) . . . . ?
 C4 N2 C3 C2 -174.6(2) . . . . ?
 C4 C9 C8 C7 0.1(4) . . . . ?
 C4 C9 C10 C11 -122.1(3) . . . . ?
 C4 C9 C10 C12 114.5(3) . . . . ?
 C4 C5 C13 C14 147.8(3) . . . . ?
 C4 C5 C13 C15 -89.0(3) . . . . ?
 C9 C4 C5 C6 -0.1(4) . . . . ?
 C9 C4 C5 C13 177.4(2) . . . . ?
 C9 C8 C7 C6 -0.6(4) . . . . ?
 C8 C9 C10 C11 58.6(3) . . . . ?
 C8 C9 C10 C12 -64.9(3) . . . . ?
 C8 C7 C6 C5 0.8(4) . . . . ?
 C7 C6 C5 C4 -0.4(4) . . . . ?
 C7 C6 C5 C13 -178.0(3) . . . . ?
 C6 C5 C13 C14 -34.7(3) . . . . ?
 C6 C5 C13 C15 88.4(3) . . . . ?
 C5 C4 C9 C8 0.2(4) . . . . ?
 C5 C4 C9 C10 -179.1(2) . . . . ?
 C10 C9 C8 C7 179.5(3) . . . . ?
 C3 N2 C1 N1 -2.0(3) . . . . ?
 C3 N2 C1 B1 171.2(2) . . . . ?
 C3 N2 C4 C9 -74.6(3) . . . . ?
 C3 N2 C4 C5 99.6(3) . . . . ?
 C2 N1 C16 C21 -82.5(3) . . . . ?
 C2 N1 C16 C17 91.0(3) . . . . ?
 C2 N1 C1 N2 3.5(3) . . . . ?
 C2 N1 C1 B1 -170.0(2) . . . . ?
 C29 C28 C33 C32 1.5(4) . . . . ?
 N3 O6 B1 O5 -50.6(3) . . . . ?
 N3 O6 B1 C1 61.0(3) . . . . ?
 N3 O6 B1 C28 -171.1(2) . . . . ?
 N4 O5 B1 O6 -48.6(3) . . . . ?
 N4 O5 B1 C1 -165.4(2) . . . . ?
 N4 O5 B1 C28 67.5(3) . . . . ?
 C24 C22 C21 C16 -127.2(3) . . . . ?
 C24 C22 C21 C20 56.2(3) . . . . ?
 C20 C21 C16 N1 177.6(2) . . . . ?
 C20 C21 C16 C17 4.3(4) . . . . ?
 C20 C19 C18 C17 1.2(5) . . . . ?
 C26 C25 C17 C16 135.0(3) . . . . ?
 C26 C25 C17 C18 -48.8(4) . . . . ?

_shelx_res_file
;
TITL mo_gk_phBNO3_0m_a.res in P2(1)/c
    mo_gk_phbno3_0m.res
    created by SHELXL-2018/3 at 11:06:56 on 03-Jun-2022
CELL 0.71073 10.1256 16.8204 18.9207 90 98.178 90
ZERR 4 0.0005 0.0013 0.0016 0 0.002 0
LATT 1
SYMM -X,0.5+Y,0.5-Z
SFAC C H B N O
UNIT 132 172 4 16 24

L.S. 50
PLAN  -5 0 0
SIZE 0.08 0.12 0.19
TEMP -113.15
HTAB
BOND $H
CONF
fmap 2
acta
REM <olex2.extras>
REM <HklSrc "%.\\mo_gk_phBNO3_0m_a.hkl">
REM </olex2.extras>

WGHT    0.109000
FVAR       0.56925
O6    5    0.845606    0.639457    0.694490    11.00000    0.01998    0.03606 =
         0.02185    0.00269    0.00299   -0.00485
O4    5    0.710509    0.605932    0.597860    11.00000    0.03511    0.04994 =
         0.02900   -0.00433    0.00320   -0.01106
O5    5    0.628358    0.706654    0.709213    11.00000    0.02155    0.03914 =
         0.03233    0.00233    0.00046   -0.00886
O1    5    0.626373    0.832848    0.720321    11.00000    0.09399    0.02898 =
         0.11528   -0.00004    0.05013    0.01507
N1    4    0.696521    0.488750    0.739416    11.00000    0.01783    0.01913 =
         0.02343   -0.00092    0.00047   -0.00149
N2    4    0.512675    0.554148    0.703517    11.00000    0.01827    0.01842 =
         0.02267   -0.00059    0.00199   -0.00149
O3    5    0.907870    0.649521    0.590394    11.00000    0.03783    0.08767 =
         0.03634    0.01155    0.01384   -0.01504
C23   1    0.638896    0.389419    0.917233    11.00000    0.04592    0.03855 =
         0.03987    0.00579    0.01371   -0.00144
AFIX 137
H23A  2    0.705338    0.367766    0.955055    11.00000   -1.50000
H23B  2    0.625897    0.352268    0.876943    11.00000   -1.50000
H23C  2    0.554140    0.397049    0.935700    11.00000   -1.50000
AFIX   0
C22   1    0.687741    0.469243    0.892275    11.00000    0.03199    0.02938 =
         0.02259    0.00402    0.00497    0.00188
AFIX  13
H22   2    0.617033    0.491047    0.855037    11.00000   -1.20000
AFIX   0
C21   1    0.814418    0.458154    0.858359    11.00000    0.02625    0.02382 =
         0.02438    0.00066    0.00145    0.00198
C16   1    0.818799    0.466840    0.784932    11.00000    0.02064    0.02205 =
         0.02377   -0.00192   -0.00012    0.00148
C1    1    0.642449    0.561093    0.729251    11.00000    0.01987    0.02564 =
         0.01361    0.00037    0.00413   -0.00119
B1    3    0.732003    0.644162    0.739073    11.00000    0.02011    0.02484 =
         0.02639    0.00491    0.00403    0.00034
C28   1    0.803216    0.667319    0.817097    11.00000    0.02616    0.02303 =
         0.02660   -0.00097    0.00407   -0.00863
C33   1    0.932080    0.641140    0.844726    11.00000    0.02624    0.02829 =
         0.03234   -0.00043    0.00513   -0.00471
AFIX  43
H33   2    0.978512    0.607301    0.816463    11.00000   -1.20000
AFIX   0
C32   1    0.993468    0.663360    0.912210    11.00000    0.03064    0.03740 =
         0.02598    0.00492   -0.00175   -0.00878
AFIX  43
H32   2    1.080283    0.644269    0.929687    11.00000   -1.20000
AFIX   0
C31   1    0.928246    0.713253    0.953945    11.00000    0.04586    0.03999 =
         0.02393   -0.00219   -0.00013   -0.01445
AFIX  43
H31   2    0.969864    0.728151    1.000237    11.00000   -1.20000
AFIX   0
C27   1    0.924391    0.360593    0.646235    11.00000    0.04418    0.03598 =
         0.03308   -0.00342    0.00506    0.00841
AFIX 137
H27A  2    0.998849    0.329545    0.671014    11.00000   -1.50000
H27B  2    0.928451    0.360191    0.594795    11.00000   -1.50000
H27C  2    0.839830    0.337157    0.655361    11.00000   -1.50000
AFIX   0
C25   1    0.933875    0.446744    0.673760    11.00000    0.02249    0.03317 =
         0.02768    0.00068    0.00500    0.00351
AFIX  13
H25   2    0.853559    0.476276    0.650500    11.00000   -1.20000
AFIX   0
C17   1    0.932034    0.447340    0.753609    11.00000    0.02224    0.02320 =
         0.02721   -0.00172    0.00138   -0.00124
C4    1    0.406587    0.613019    0.691847    11.00000    0.01654    0.01925 =
         0.02852   -0.00059    0.00321   -0.00171
C9    1    0.351231    0.631021    0.622255    11.00000    0.02021    0.02097 =
         0.02882    0.00129    0.00008   -0.00215
C8    1    0.240899    0.682390    0.613030    11.00000    0.02927    0.02972 =
         0.03409    0.00561   -0.00703    0.00168
AFIX  43
H8    2    0.200928    0.695630    0.566008    11.00000   -1.20000
AFIX   0
C7    1    0.189384    0.713890    0.669851    11.00000    0.02524    0.02862 =
         0.05070   -0.00162    0.00236    0.00588
AFIX  43
H7    2    0.115152    0.748932    0.662126    11.00000   -1.20000
AFIX   0
C6    1    0.245618    0.694603    0.738556    11.00000    0.02831    0.03163 =
         0.04238   -0.00728    0.01032    0.00203
AFIX  43
H6    2    0.208466    0.716271    0.777712    11.00000   -1.20000
AFIX   0
C5    1    0.355811    0.644001    0.751863    11.00000    0.02330    0.02321 =
         0.02847   -0.00405    0.00410   -0.00311
C13   1    0.411415    0.622363    0.827981    11.00000    0.02680    0.03310 =
         0.02414   -0.00442    0.00715    0.00092
AFIX  13
H13   2    0.508002    0.609141    0.829213    11.00000   -1.20000
AFIX   0
C14   1    0.401482    0.690510    0.880750    11.00000    0.03808    0.04992 =
         0.03137   -0.01133    0.00826    0.00059
AFIX 137
H14A  2    0.432434    0.739933    0.861119    11.00000   -1.50000
H14B  2    0.457172    0.678422    0.926184    11.00000   -1.50000
H14C  2    0.308488    0.696745    0.888685    11.00000   -1.50000
AFIX   0
C15   1    0.341686    0.548889    0.852531    11.00000    0.04692    0.04426 =
         0.03283    0.00324    0.01179   -0.00890
AFIX 137
H15A  2    0.246193    0.559835    0.850672    11.00000   -1.50000
H15B  2    0.380109    0.535661    0.901610    11.00000   -1.50000
H15C  2    0.354034    0.504047    0.821054    11.00000   -1.50000
AFIX   0
C10   1    0.403284    0.597417    0.557312    11.00000    0.03023    0.03684 =
         0.02176    0.00374    0.00052    0.00516
AFIX  13
H10   2    0.484611    0.565165    0.574242    11.00000   -1.20000
AFIX   0
C11   1    0.443809    0.664094    0.510049    11.00000    0.05777    0.06602 =
         0.03964    0.02204    0.01297    0.00986
AFIX 137
H11A  2    0.364714    0.694935    0.490776    11.00000   -1.50000
H11B  2    0.484309    0.641171    0.470621    11.00000   -1.50000
H11C  2    0.508420    0.698981    0.538408    11.00000   -1.50000
AFIX   0
C12   1    0.301441    0.542978    0.514595    11.00000    0.04684    0.05824 =
         0.03270   -0.01050   -0.00647    0.00694
AFIX 137
H12A  2    0.281204    0.498434    0.544673    11.00000   -1.50000
H12B  2    0.338002    0.522542    0.472908    11.00000   -1.50000
H12C  2    0.219563    0.572917    0.498709    11.00000   -1.50000
AFIX   0
C3    1    0.472308    0.469759    0.692321    11.00000    0.02393    0.02422 =
         0.02941   -0.00131    0.00172   -0.00283
AFIX  23
H3A   2    0.437940    0.459326    0.641535    11.00000   -1.20000
H3B   2    0.402983    0.455141    0.721976    11.00000   -1.20000
AFIX   0
C2    1    0.600487    0.424595    0.715411    11.00000    0.02583    0.02626 =
         0.03574   -0.00484   -0.00180   -0.00062
AFIX  23
H2A   2    0.590727    0.387351    0.754852    11.00000   -1.20000
H2B   2    0.628462    0.394506    0.675082    11.00000   -1.20000
AFIX   0
C29   1    0.741868    0.718656    0.860857    11.00000    0.02869    0.03003 =
         0.03810   -0.00366    0.00664   -0.00107
AFIX  43
H29   2    0.655481    0.738664    0.843766    11.00000   -1.20000
AFIX   0
C30   1    0.802531    0.741347    0.928171    11.00000    0.04574    0.03346 =
         0.03369   -0.01063    0.01022   -0.00702
AFIX  43
H30   2    0.757736    0.776096    0.956441    11.00000   -1.20000
AFIX   0
N3    4    0.818474    0.631428    0.623366    11.00000    0.02906    0.03912 =
         0.03358    0.00466    0.00702   -0.00244
N4    4    0.668076    0.777125    0.693894    11.00000    0.03900    0.02937 =
         0.05495   -0.01063   -0.00443    0.01081
O2    5    0.737236    0.784088    0.644850    11.00000    0.13660    0.04262 =
         0.13417    0.00623    0.09102   -0.00678
C24   1    0.708104    0.528235    0.954585    11.00000    0.05562    0.04206 =
         0.03024    0.00244    0.01630    0.00106
AFIX 137
H24A  2    0.623453    0.536053    0.973115    11.00000   -1.50000
H24B  2    0.739027    0.579205    0.937933    11.00000   -1.50000
H24C  2    0.774857    0.507177    0.992560    11.00000   -1.50000
AFIX   0
C20   1    0.930843    0.434270    0.900869    11.00000    0.03966    0.03670 =
         0.02099    0.00183   -0.00123    0.00404
AFIX  43
H20   2    0.931805    0.429443    0.950966    11.00000   -1.20000
AFIX   0
C19   1    1.044596    0.417491    0.871946    11.00000    0.02838    0.04383 =
         0.03382    0.00352   -0.00824    0.00699
AFIX  43
H19   2    1.123433    0.401878    0.902121    11.00000   -1.20000
AFIX   0
C18   1    1.044837    0.423207    0.799391    11.00000    0.02191    0.03871 =
         0.03806   -0.00216    0.00021    0.00361
AFIX  43
H18   2    1.123830    0.410384    0.780104    11.00000   -1.20000
AFIX   0
C26   1    1.058090    0.487248    0.652759    11.00000    0.03473    0.05973 =
         0.04667    0.01194    0.01242   -0.00337
AFIX 137
H26A  2    1.067922    0.540184    0.674506    11.00000   -1.50000
H26B  2    1.048694    0.492273    0.600682    11.00000   -1.50000
H26C  2    1.137126    0.455202    0.669651    11.00000   -1.50000
AFIX   0
HKLF 4


REM  mo_gk_phBNO3_0m_a.res in P2(1)/c
REM wR2 = 0.2175, GooF = S = 0.995, Restrained GooF = 0.995 for all data
REM R1 = 0.0693 for 3960 Fo > 4sig(Fo) and 0.1607 for all 7552 data
REM 405 parameters refined using 0 restraints

END

WGHT      0.1090      0.0000

REM Instructions for potential hydrogen bonds
EQIV $1 -x+1, y-1/2, -z+3/2
HTAB C3 O1_$1
HTAB C2 O1_$1

REM Highest difference peak  0.508,  deepest hole -0.760,  1-sigma level  0.235
Q1    1   0.5449  0.6774  0.5183  11.00000  0.05    0.51
Q2    1   0.2024  0.8099  0.5360  11.00000  0.05    0.50
Q3    1   0.1835  0.7235  0.5244  11.00000  0.05    0.50
Q4    1   0.7319  0.3600  0.9711  11.00000  0.05    0.49
Q5    1   0.1689  0.8564  0.5247  11.00000  0.05    0.48
;
_shelx_res_checksum                21742
_shelx_hkl_file
;
  -2   0   0 1407.66  101.09
   2   0   0 1411.56  101.09
  -3   0   0 5439.16  395.46
   3   0   0 5655.03  395.36
  -4   0   0  860.21   63.19
   5   0   0   59.29    6.60
  -5   0   0   51.99    6.90
   6   0   0   56.29    7.20
  -6   0   0   53.29    7.40
   7   0   0 1313.67   96.39
  -7   0   0 1320.87   96.99
  -8   0   0  417.96   34.30
   8   0   0  445.06   33.90
   9   0   0 1071.89   81.39
  10   0   0    8.80    4.40
  10   0   0    5.10    4.90
  -1   1   0    0.50    0.80
   2  -1   0 2681.73  193.58
  -2   1   0 2725.83  193.68
  -3  -1   0  749.82   56.39
   3  -1   0  847.12   57.89
  -3   1   0  770.72   57.79
   3   1   0  774.22   56.29
   4  -1   0 1089.09   76.69
  -4  -1   0  975.00   75.19
  -4   1   0 1032.30   76.69
   4   1   0 1075.19   75.09
  -5  -1   0   21.30    3.70
   5  -1   0   29.30    5.30
   5   1   0   33.80    3.90
  -5   1   0   36.30    6.20
  -6  -1   0   20.20    3.80
   6  -1   0   15.70    4.60
   6   1   0   19.00    3.50
  -6   1   0   21.00    5.60
   7  -1   0  173.18   16.20
  -7   1   0  172.98   16.80
   7   1   0  164.98   14.00
   8  -1   0    0.10    4.50
   8   1   0    2.60    3.00
  -8   1   0    3.60    5.10
   8   1   0    2.80    2.70
   9  -1   0   62.99    9.60
  -9   1   0   69.29   10.70
   9   1   0   58.29    5.80
   9   1   0   63.39    6.00
  10  -1   0  138.39   15.20
 -10   1   0  125.19   15.60
  11  -1   0   21.40    7.10
  12  -1   0   22.60    4.80
   0  -2   0 1197.88   86.39
   1  -2   0   10.90    2.40
  -1  -2   0   14.40    2.00
  -1   2   0   12.90    2.60
   1   2   0   13.30    1.90
  -2  -2   0 2046.70  154.68
  -2   2   0 2159.78  156.48
   2   2   0 2306.07  154.68
   3  -2   0  568.74   43.30
  -3   2   0  572.84   43.50
   4  -2   0   -0.90    2.40
  -4   2   0   -0.50    2.60
   5  -2   0 1631.94  123.49
  -5   2   0 1744.83  124.09
   6  -2   0  250.07   22.10
   7  -2   0   -2.80    4.30
  -7   2   0   13.30    5.90
   8  -2   0  527.75   43.20
  -8   2   0  547.95   44.30
   9  -2   0  229.08   23.10
  -9   2   0  268.47   25.30
  10  -2   0   28.10    8.80
 -10   2   0   18.30    9.70
  11  -2   0   97.89   13.90
 -11   2   0   88.49   15.10
  12  -2   0   16.30    9.50
   0  -3   0    2.40    1.60
   0   3   0    1.60    1.50
  -1  -3   0 3981.90  297.47
   1  -3   0 4240.58  298.57
   1   3   0 3992.90  297.47
  -1   3   0 4471.25  298.67
  -2  -3   0 3461.75  253.77
  -2   3   0 3562.04  255.27
   2   3   0 3629.04  253.27
  -3  -3   0 1292.47   94.89
   3   3   0 1372.86   94.89
  -3   3   0 1314.17   97.89
   4  -3   0  141.19   14.20
  -4   3   0  152.58   14.50
   5  -3   0  185.88   17.60
  -5   3   0  181.98   17.70
   6  -3   0  620.94   50.99
  -6   3   0  680.93   51.89
   7  -3   0  190.48   20.10
  -7   3   0  213.88   21.00
   8  -3   0   30.40    8.10
  -8   3   0   41.80   10.10
   9  -3   0  258.47   26.10
  -9   3   0  280.57   27.80
  10  -3   0   -4.00    8.20
 -10   3   0   -7.70    9.80
  11  -3   0   42.10   11.60
 -11   3   0   58.49   14.20
  12  -3   0   -5.20   11.40
 -12   3   0    1.90   13.50
  13  -3   0   -5.10   12.80
   0  -4   0 1064.69   76.39
   0   4   0 1010.90   76.29
   1  -4   0   12.70    3.50
   1   4   0    9.40    2.60
  -1   4   0   10.50    3.30
   2  -4   0 2695.83  183.28
  -2  -4   0 2341.87  180.98
  -2   4   0 2308.27  182.78
   2   4   0 2760.12  181.38
  -3  -4   0   14.80    2.50
   3  -4   0   10.10    4.30
   3   4   0   23.00    3.00
  -3   4   0   18.00    4.80
  -4  -4   0 1641.04  124.39
   4   4   0 1822.52  124.49
  -4   4   0 1783.02  128.99
   5  -4   0  544.45   45.70
  -5   4   0  607.34   46.60
   6  -4   0  207.08   20.30
  -6   4   0  192.08   20.30
  -7   4   0   30.90    8.80
   8  -4   0  100.69   14.00
  -8   4   0   86.09   14.70
   9  -4   0   41.60   11.40
  -9   4   0   19.70    9.90
  10  -4   0   10.20   10.10
 -10   4   0   35.10   11.60
 -11   4   0  -10.20   12.40
  12  -4   0   60.69   15.60
 -12   4   0   16.50   16.50
   0   5   0    2.70    2.40
   1  -5   0  654.73   47.90
  -1  -5   0  624.64   46.80
   1   5   0  589.74   46.70
  -1   5   0  606.54   47.70
   2  -5   0 5330.27  367.16
  -2  -5   0 4824.62  364.76
  -2   5   0 4945.31  366.86
   2   5   0 5324.57  365.16
   3  -5   0   18.50    5.60
  -3  -5   0   31.20    4.50
  -3   5   0   28.30    6.30
   3   5   0   33.40    4.80
  -4  -5   0   33.50    4.00
  -4   5   0   36.00    7.70
   4   5   0   33.60    4.20
   5  -5   0  212.18   23.00
  -5   5   0  208.68   21.10
   6  -5   0    0.00    5.60
  -6   5   0    2.00    5.60
   7  -5   0  114.99   16.80
  -7   5   0  119.09   17.00
   8  -5   0  106.79   16.00
   9  -5   0  702.23   58.39
  -9   5   0  704.33   59.69
  10  -5   0   60.49   14.20
 -10   5   0   78.39   16.60
  11  -5   0  -17.30   11.30
 -11   5   0   -4.00   14.20
  12  -5   0  -13.50   14.60
 -12   5   0    4.60   17.90
  13  -5   0   20.00   18.80
 -13   5   0   -3.60   21.30
   0  -6   0  643.54   47.30
   0   6   0  572.24   47.10
  -1  -6   0   23.60    4.80
   1   6   0   22.50    5.10
  -1   6   0   21.70    5.70
  -2  -6   0  314.67   28.20
   2  -6   0  306.97   29.80
  -2   6   0  417.06   31.20
   2   6   0  409.46   29.10
  -3  -6   0   26.90    5.00
   3  -6   0   35.50    7.70
  -3   6   0   57.09    9.40
   3   6   0   49.30    6.60
  -4  -6   0    1.50    2.20
   4  -6   0    5.90    5.00
   4   6   0    9.10    2.90
  -4   6   0   10.70    5.30
   5  -6   0    0.30    4.60
  -5  -6   0    8.50    2.10
   5   6   0   13.00    2.60
  -5   6   0    3.40    5.30
   6  -6   0   61.29   12.20
  -6   6   0   59.29   11.90
   7  -6   0   69.59   13.20
  -7   6   0   50.49   12.50
   8  -6   0    5.50    8.20
  -8   6   0    3.50    9.10
   9  -6   0  104.69   17.70
  -9   6   0   53.39   15.90
  10  -6   0    0.30   11.40
 -10   6   0    3.50   13.70
  11  -6   0  102.09   19.90
 -11   6   0  110.89   22.30
  12  -6   0   41.70   17.70
 -12   6   0  -17.10   21.00
  13  -6   0   65.39   24.50
   0  -7   0    5.00    3.50
   0   7   0    4.20    4.00
  -1  -7   0 1529.75  109.79
   1  -7   0 1653.13  111.19
   1   7   0 1289.77  109.29
  -1   7   0 1483.05  110.79
  -2  -7   0 1576.64  115.19
   2   7   0 1608.64  115.59
  -2   7   0 1515.55  117.19
  -3  -7   0 1920.11  142.19
   3  -7   0 1888.61  144.89
   3   7   0 2054.29  142.59
  -3   7   0 1946.51  145.39
   4  -7   0  350.06   31.40
  -4  -7   0  334.97   27.40
   4   7   0  381.96   28.00
  -4   7   0  303.97   30.90
  -5  -7   0   52.99    6.40
   5  -7   0   55.99   11.50
  -5   7   0   38.00   10.30
   5   7   0   60.39    7.10
  -6   7   0   51.49   11.30
   7  -7   0  299.27   30.50
  -7   7   0  298.77   31.10
   8  -7   0    5.70    9.70
  -8   7   0   21.30   11.30
   9  -7   0  122.39   23.40
  -9   7   0  121.19   20.80
  10  -7   0    9.80   12.90
 -10   7   0  -33.50   13.00
  11  -7   0   53.79   18.80
 -11   7   0   70.69   20.80
  12  -7   0  -26.60   19.50
 -12   7   0    5.90   22.30
   0  -8   0  165.68   17.10
   0   8   0  168.68   17.50
  -1  -8   0    4.10    3.90
   1  -8   0   -0.90    4.10
  -1   8   0    4.80    4.70
   1   8   0   -0.30    3.70
  -2  -8   0  364.96   30.40
   2  -8   0  369.06   32.10
   2   8   0  377.66   30.80
  -2   8   0  331.57   32.00
  -3  -8   0    3.20    4.00
   3   8   0   -5.00    3.40
  -3   8   0   -2.90    5.30
  -4  -8   0  274.87   24.00
   4  -8   0  291.77   28.10
   4   8   0  297.07   24.50
  -4   8   0  299.77   28.80
  -5  -8   0   29.10    5.50
   5  -8   0   38.00    9.70
  -5   8   0   42.70   11.00
   5   8   0   35.50    7.10
   6  -8   0   57.49   13.80
  -6  -8   0   68.69    6.50
  -6   8   0   76.49   14.70
   6   8   0   58.99    6.60
  -7   8   0  357.96   35.50
   8  -8   0   74.39   16.00
  -8   8   0   79.49   18.10
   9  -8   0    6.80   12.40
  -9   8   0    3.60   12.80
  10  -8   0    7.00   15.40
 -10   8   0   18.30   16.10
  11  -8   0   30.60   19.30
 -11   8   0   25.20   19.30
  12  -8   0   -4.30   21.50
 -12   8   0   45.10   31.20
   0  -9   0   -2.10    4.70
   0   9   0   -6.00    4.20
  -1  -9   0   -4.50    4.40
   1  -9   0    2.20    4.40
   1   9   0   -0.20    4.50
  -1   9   0    3.90    5.50
   2  -9   0  439.76   42.10
  -2  -9   0  570.04   41.70
   2   9   0  481.95   41.30
  -2   9   0  534.55   43.90
   3  -9   0   42.90   10.40
  -3  -9   0   40.50    8.20
  -3   9   0   33.70    9.50
   3   9   0   38.40    8.10
  -4  -9   0  847.62   64.29
  -4   9   0  901.51   69.39
   4   9   0  795.12   65.49
   5  -9   0  189.48   22.40
  -5  -9   0  185.98   16.70
   5   9   0  160.38   16.60
  -5   9   0  181.78   23.80
  -6  -9   0   52.89    7.20
   6  -9   0   66.59   14.30
   6   9   0   58.29    7.70
  -6   9   0   64.69   14.50
   7  -9   0  147.59   22.20
  -7   9   0  139.79   22.30
  -8   9   0   17.90   12.10
   9  -9   0    6.00   13.20
  -9   9   0  -17.10   13.00
 -10   9   0   15.80   17.50
  11  -9   0   -6.70   20.30
 -11   9   0  -37.30   20.90
   0 -10   0  766.92   59.09
   0  10   0  690.63   58.69
  -1 -10   0  511.95   42.80
   1 -10   0  560.94   44.30
  -1  10   0  471.15   43.50
   1  10   0  500.75   43.00
   2 -10   0  286.77   27.30
  -2 -10   0  254.87   24.60
   2  10   0  233.88   24.50
  -2  10   0  281.87   27.20
   3 -10   0  356.46   32.90
  -3 -10   0  315.67   29.80
  -3  10   0  317.87   32.60
   3  10   0  358.56   30.90
  -4 -10   0   39.40    8.40
   4 -10   0   67.29   13.30
  -4  10   0   66.89   13.90
   4  10   0   43.70    9.20
  -5 -10   0  148.19   15.20
   5  10   0  137.99   15.20
  -5  10   0  120.89   20.70
   6 -10   0  332.67   32.60
  -6 -10   0  274.37   23.20
  -6  10   0  251.97   30.30
   6  10   0  259.27   23.30
   7 -10   0  264.07   33.00
  -7  10   0  321.47   34.40
   8 -10   0   74.99   18.50
  -8  10   0   78.39   17.90
   9 -10   0   13.40   15.30
  -9  10   0   20.30   15.50
  10 -10   0   21.70   18.50
 -10  10   0   12.80   20.00
  11 -10   0   84.39   25.80
 -11  10   0   89.59   28.00
   0 -11   0   -3.20    6.50
   0  11   0   13.70    7.00
  -1 -11   0  231.88   23.70
   1 -11   0  221.48   24.50
   1  11   0  190.08   23.10
  -1  11   0  276.37   26.10
   2 -11   0   29.40    9.20
  -2 -11   0   13.10    7.00
   2  11   0   22.80    8.20
  -2  11   0    1.40    8.30
  -3 -11   0   11.00    6.50
   3 -11   0    7.00    7.30
   3  11   0    1.50    6.60
  -3  11   0    1.40    8.60
   4 -11   0  240.08   29.30
  -4 -11   0  293.67   26.00
  -4  11   0  339.77   31.60
   4  11   0  243.78   25.80
  -5 -11   0  198.78   19.00
   5 -11   0  142.29   23.10
  -5  11   0  194.98   26.50
   5  11   0  165.78   18.40
  -6 -11   0  162.28   16.80
  -6  11   0  168.78   25.20
   6  11   0  166.58   17.60
  -7 -11   0    4.20    4.30
   7 -11   0   10.80   12.80
  -7  11   0   14.70   13.10
   7  11   0    6.00    4.60
   8 -11   0    4.60   14.10
  -8  11   0   11.90   14.50
  -9  11   0  -12.80   16.30
  10 -11   0   69.99   22.90
 -10  11   0   11.80   21.00
   0 -12   0 1335.27  107.29
   0  12   0 1458.35  108.79
  -1 -12   0  101.29   19.10
   1 -12   0  143.29   19.80
   1  12   0   78.39   15.00
  -1  12   0   89.39   16.00
   2 -12   0  272.87   28.80
  -2 -12   0  260.97   26.50
   2  12   0  253.27   26.70
  -2  12   0  248.18   28.80
   3 -12   0    3.40   10.10
  -3 -12   0   12.10    8.60
  -3  12   0   13.00   10.60
   3  12   0   20.50    7.50
  -4 -12   0   48.10   10.20
   4 -12   0   56.09   14.80
   4  12   0   27.00    9.70
  -4  12   0   49.10   14.30
  -5 -12   0   66.09   11.90
   5 -12   0   87.79   18.50
  -5  12   0   67.09   16.90
   5  12   0   64.59   12.10
   6 -12   0   33.20   13.70
  -6 -12   0   38.70    9.10
   6  12   0   49.40   10.00
  -6  12   0   40.30   14.30
  -7 -12   0   75.09    9.50
   7 -12   0   28.40   18.50
   7  12   0   58.59    9.50
  -7  12   0   58.79   18.40
   8 -12   0   15.40   17.30
  -8  12   0   23.00   16.90
   9 -12   0   83.69   24.90
  -9  12   0   51.09   22.70
 -10  12   0   -1.60   22.70
   0  13   0    0.30    8.80
   1 -13   0   45.90   12.70
  -1 -13   0   63.79   13.00
  -1  13   0   67.69   15.20
   1  13   0   48.00   12.10
  -2 -13   0   41.60   11.50
   2 -13   0   44.90   13.70
   2  13   0   33.30   10.60
  -2  13   0   49.00   14.30
   3 -13   0   48.20   15.10
  -3 -13   0   63.99   13.30
   3  13   0   76.59   14.10
  -3  13   0   48.70   15.00
   4 -13   0   33.40   12.60
  -4 -13   0    4.50    7.40
   4  13   0   32.70   10.40
  -4  13   0   47.80   14.50
   5 -13   0    6.40   13.10
  -5  13   0   19.20   13.90
   5  13   0   26.60    9.70
   6 -13   0  105.49   21.20
  -6 -13   0  136.29   16.90
  -6  13   0  136.49   25.00
   6  13   0  113.29   16.50
  -7 -13   0   35.40    8.70
   7 -13   0   47.40   19.60
  -7  13   0   32.80   16.30
   7  13   0   32.60    9.30
   8 -13   0   35.90   21.30
  -8  13   0   55.39   22.20
   9 -13   0  -15.80   20.80
  -9  13   0   59.99   24.10
  10 -13   0    1.70   24.30
 -10  13   0   26.10   40.20
   0 -14   0  150.88   22.60
   0  14   0  124.99   21.50
  -1 -14   0  430.96   37.60
   1 -14   0  324.07   37.20
   1  14   0  331.67   36.50
  -1  14   0  395.56   38.90
  -2 -14   0    3.50   10.00
   2 -14   0    8.40   11.30
   2  14   0   21.80   11.00
  -2  14   0   26.40   13.10
   3 -14   0   60.59   15.40
  -3 -14   0   57.69   12.80
  -3  14   0  110.69   19.30
   3  14   0   93.39   16.20
   4 -14   0   42.90   15.00
   4  14   0   18.70   10.00
  -4  14   0   45.50   14.90
   5 -14   0  106.09   21.00
   5  14   0   98.99   19.10
  -5  14   0   79.49   19.90
  -6 -14   0   24.90   10.10
   6 -14   0   12.70   16.30
   6  14   0   54.59   12.30
  -6  14   0   29.50   16.40
  -7 -14   0  100.49   14.80
   7 -14   0  127.79   26.60
  -7  14   0  103.69   23.40
   7  14   0  110.89   15.60
   8 -14   0   -3.80   20.20
  -8 -14   0    2.80    4.90
  -8  14   0   -5.00   20.60
   8  14   0   -6.30    5.20
   9 -14   0   35.90   27.10
   0 -15   0    3.90   10.70
   0  15   0   14.90   11.50
  -1 -15   0  401.66   39.90
   1 -15   0  453.45   41.50
  -1  15   0  402.76   41.40
   1  15   0  345.57   39.40
   2 -15   0    2.90   12.40
  -2 -15   0    1.40   11.30
  -2  15   0   -5.70   11.50
   2  15   0   36.30   13.90
  -3 -15   0   56.29   15.00
   3 -15   0   65.89   19.50
   3  15   0   76.69   16.40
  -3  15   0   49.40   22.80
   4 -15   0  186.38   29.90
  -4  15   0  213.48   31.20
   5 -15   0  242.78   33.80
  -5  15   0  214.38   32.20
   5  15   0  194.38   26.40
   6 -15   0   71.89   20.90
  -6 -15   0   51.39   13.60
   6  15   0   41.80   13.30
  -6  15   0   83.79   23.80
   7 -15   0   12.90   21.90
  -7  15   0   42.50   21.00
   8 -15   0  -21.10   23.90
  -8  15   0   -1.80   23.60
   9 -15   0    7.90   27.50
  -9  15   0    1.10   30.20
   0 -16   0   74.09   19.10
   0  16   0   62.99   16.90
  -1 -16   0    3.20   12.40
   1 -16   0   -5.70   12.30
  -1  16   0   10.60   13.50
   1  16   0   13.20   13.00
   2 -16   0   84.09   20.30
  -2 -16   0   71.39   19.30
   2  16   0   81.49   19.00
  -2  16   0   58.79   19.50
   3 -16   0   -3.40   14.70
   3  16   0    6.00   12.70
  -3  16   0    1.10   14.10
  -4 -16   0   -4.30   12.40
  -4  16   0   40.70   19.40
   4  16   0   43.60   15.40
   5 -16   0    1.60   18.00
  -5 -16   0   -7.30   11.80
   5  16   0   14.00   14.20
  -5  16   0   12.00   18.10
   6 -16   0   26.50   23.00
  -6  16   0   55.49   22.90
   7 -16   0   61.29   25.40
  -7  16   0   50.49   25.50
   8 -16   0   60.79   30.10
  -8  16   0   -6.10   26.30
   0 -17   0    4.60   13.80
   0  17   0    1.70   14.20
   1 -17   0   38.70   16.90
  -1  17   0   29.90   16.90
   1  17   0   28.40   16.50
   2 -17   0  214.48   31.60
  -2 -17   0  105.29   28.70
   2  17   0  265.07   32.60
  -2  17   0  164.08   30.50
  -3 -17   0   38.10   15.50
   3 -17   0   39.90   19.10
  -3  17   0   37.80   18.70
   3  17   0   88.89   19.40
   4 -17   0   39.50   21.10
  -4 -17   0   59.99   17.50
  -4  17   0   75.79   23.70
   5 -17   0   12.50   20.50
  -5  17   0   16.20   21.20
   6 -17   0   49.00   26.70
   7 -17   0   75.49   30.00
  -7  17   0   69.39   30.80
   8 -17   0   24.80   34.80
  -8  17   0   10.90   36.20
  -1 -18   0   36.10   18.30
   1 -18   0   38.00   19.60
  -1  18   0   -2.50   19.40
   1  18   0   62.69   20.40
  -2 -18   0   22.80   16.50
   2 -18   0    1.00   16.50
   2  18   0  -10.70   15.80
  -2  18   0   -2.50   18.00
   3 -18   0   30.00   21.80
  -3  18   0    7.50   21.00
   4 -18   0   -0.70   21.10
  -4  18   0    6.00   22.40
   5 -18   0    2.60   21.90
  -5  18   0   -0.90   23.20
   6 -18   0  -34.40   24.70
  -6  18   0  -22.20   26.40
   7 -18   0   25.20   35.20
  -7  18   0   45.00   33.30
   0 -19   0  -25.20   19.90
   0  19   0  -14.40   19.00
   1 -19   0   32.40   21.00
  -1 -19   0   45.90   20.50
  -1  19   0   42.90   22.50
   1  19   0    1.00   20.80
  -2  19   0  -14.30   19.80
   3 -19   0    8.40   21.90
  -3  19   0  -27.10   23.40
   4 -19   0   -2.80   23.10
  -4  19   0  -52.29   23.80
   5 -19   0   26.40   29.90
  -5  19   0   60.69   27.20
   6 -19   0   49.00   32.30
  -6  19   0   10.40   31.60
   1 -20   0  -21.90   23.40
  -1  20   0   14.60   24.50
   2 -20   0   14.00   25.20
  -2  20   0  -33.50   25.20
   3 -20   0   12.40   31.30
  -3  20   0   21.30   25.60
  -4  20   0   54.29   31.60
   5 -20   0   27.20   34.20
  -5  20   0   65.69   32.70
   6 -20   0   -4.80   37.90
  -6  20   0   -9.50   37.80
   3 -21   0   19.30   31.60
  -3  21   0   62.29   31.70
   4 -21   0   66.29   35.20
  -4  21   0   28.80   33.00
   5 -21   0    8.20   36.60
  -5  21   0   86.49   39.60
  10   0  -1    1.30    4.00
  -9   0   1    3.90    4.90
  -8   0   1   -5.20    4.00
   8   0  -1   -1.40    3.50
   7   0  -1    3.30    3.30
  -7   0   1   -2.80    3.30
   6   0  -1    1.80    2.50
  -6   0   1   -4.50    2.60
  -5   0   1    2.40    2.20
   5   0  -1    3.20    2.30
  -4   0   1    1.30    1.70
  -3   0   1   -1.60    1.10
   3   0  -1    0.00    1.10
  -2   0   1    0.20    0.80
   2   0  -1    0.80    0.80
   1   0  -1   -0.80    0.40
  -1   0   1    0.10    0.40
  -1   0  -1   -0.70    0.60
   1   0   1    0.50    0.70
  -2   0  -1    1.90    1.30
   2   0   1    2.50    1.10
  -3   0  -1    1.20    1.50
   3   0   1    3.10    1.80
  -4   0  -1   -0.80    1.80
   4   0   1    4.30    2.40
  -5   0  -1    5.20    2.70
   5   0   1   -2.60    2.00
   6   0   1   -3.40    2.60
  -6   0  -1    0.20    3.10
  -7   0  -1    0.10    3.80
   7   0   1   -0.50    3.20
  -8   0  -1   -1.20    4.40
   8   0   1    2.60    4.10
   9   0   1    5.90    4.80
  10   0   1   10.00    4.80
  10   0   1    2.40    5.30
  11   0   1   -1.40    3.50
  11   0   1    3.20    3.90
  11  -1  -1   -0.50    5.70
  10  -1  -1  367.56   31.10
 -10   1   1  378.86   32.00
   9  -1  -1  178.08   17.30
  -9   1   1  163.08   18.20
   8  -1  -1    0.00    4.30
  -8   1   1    0.90    5.20
   8   1  -1    1.70    2.20
  -7  -1   1   70.29    7.00
   7  -1  -1   59.99    8.60
  -7   1   1   55.79    9.10
   7   1  -1   59.89    6.40
   6  -1  -1    7.90    3.40
  -6  -1   1    6.40    2.70
  -6   1   1   14.40    4.30
   6   1  -1    9.60    2.50
   5  -1  -1    1.20    2.70
  -5  -1   1   -2.50    1.50
  -5   1   1   -3.80    2.30
   5   1  -1    1.40    1.50
   4  -1  -1  187.98   15.20
  -4  -1   1  164.38   13.60
   4   1  -1  181.38   13.60
  -4   1   1  182.58   15.20
  -3  -1   1  111.59    9.10
   3  -1  -1  124.09   10.50
  -3   1   1  108.99   10.30
   3   1  -1  128.59    9.20
  -2  -1   1 1515.55  109.69
   2  -1  -1 1465.85  110.89
  -2   1   1 1517.35  110.89
   2   1  -1 1650.83  109.79
  -1  -1  -1 1155.28   81.99
   1   1   1 1128.19   81.99
   2   1   1 2895.21  198.78
  -2   1  -1 2585.54  199.68
   2   1   1 2863.81  198.78
   3  -1   1 1432.06   99.99
   3   1   1 1416.66   98.79
  -3   1  -1 1261.27   99.79
   4  -1   1  128.89   12.00
   4   1   1  131.39   10.90
  -4   1  -1  117.79   12.00
  -5   1  -1  450.85   35.30
   5   1   1  438.96   33.40
   6  -1   1  179.58   18.20
   6   1   1  219.98   17.10
  -6   1  -1  223.38   19.50
   7  -1   1  218.98   19.70
   7   1   1  220.68   18.30
  -7   1  -1  209.68   20.30
   7   1   1  217.88   17.90
   8  -1   1   20.40    6.30
   8   1   1   26.50    4.90
   8   1   1   26.80    4.80
  -8   1  -1   25.20    7.50
   9  -1   1  352.56   28.40
   9   1   1  316.57   25.30
  -9   1  -1  331.67   29.40
   9   1   1  326.47   25.50
  10  -1   1  220.58   20.90
  11  -1   1   -7.70    7.40
  11  -1   1    2.50    6.90
  12  -1   1    4.40    5.90
  12  -2  -1   95.59   13.30
  11  -2  -1   86.99   13.50
 -11   2   1  110.49   15.30
  10  -2  -1   16.70    7.90
 -10   2   1   27.50    9.60
   9  -2  -1   16.00    6.50
  -9   2   1   13.80    7.90
   8  -2  -1  222.48   20.00
  -8   2   1  177.68   20.10
   7  -2  -1   38.80    7.70
  -7   2   1   55.29    9.30
   6  -2  -1   18.60    5.30
   5  -2  -1  103.49   11.30
  -5   2   1  107.29   11.50
   4  -2  -1   29.20    5.50
  -4   2   1   33.40    5.70
   3  -2  -1  464.55   34.30
  -3   2   1  419.96   33.90
  -2  -2   1 1852.71  133.19
  -2   2   1 1825.22  134.79
   2   2  -1 1917.61  133.19
  -1  -2   1 1852.21  140.59
   1  -2  -1 1877.11  141.29
  -1   2   1 1968.60  141.39
   1   2  -1 2160.38  140.89
   0   2  -1 3543.05  252.87
   0   2   1 3531.55  252.67
  -1  -2  -1 1405.06  107.69
   1  -2   1 1627.74  108.89
   1   2   1 1547.75  107.79
  -1   2  -1 1427.16  108.59
  -2  -2  -1 2358.86  168.98
   2   2   1 2488.45  169.08
  -2   2  -1 2236.68  170.48
   3  -2   1   86.29    9.40
   3   2   1   97.89    7.60
  -3   2  -1   81.09    9.50
   4  -2   1    2.80    3.00
  -4   2  -1    3.70    3.00
   4   2   1    1.40    1.30
   4   2   1    2.40    1.50
   5  -2   1 1172.68   88.09
   5   2   1 1159.38   85.29
   5   2   1 1158.28   85.29
  -5   2  -1 1266.57   88.89
   6  -2   1  393.16   32.70
   6   2   1  394.06   29.40
  -6   2  -1  420.16   35.30
   6   2   1  392.36   29.50
   7  -2   1   25.70    6.90
  -7   2  -1   39.40    8.40
   7   2   1   31.60    3.70
   7   2   1   31.40    3.90
   8  -2   1  271.47   24.10
  -8   2  -1  245.58   24.90
   9  -2   1    4.90    6.50
  -9   2  -1    5.10    7.80
  10  -2   1   51.99   10.60
 -10   2  -1   61.59   12.00
  11  -2   1   18.80    9.50
  12  -2   1   27.60   10.10
  13  -3  -1  -13.70   11.70
  12  -3  -1  -22.40   10.30
 -12   3   1   -8.20   12.00
  11  -3  -1   13.20    9.70
 -11   3   1   23.10   11.80
  10  -3  -1   50.79   11.70
 -10   3   1   53.69   13.50
   9  -3  -1    8.90    7.60
  -9   3   1   16.00    8.90
   8  -3  -1   35.40    8.30
  -8   3   1   25.70    8.70
   7  -3  -1    7.10    4.90
  -7   3   1    5.20    5.50
   6  -3  -1   45.70    8.40
  -6   3   1   62.99    9.80
   5  -3  -1  139.59   14.10
  -5   3   1  118.49   13.20
   4  -3  -1  300.07   24.90
  -4   3   1  284.57   24.50
  -3  -3   1 1289.57   95.79
   3   3  -1 1387.56   95.89
  -3   3   1 1353.26   98.69
  -2  -3   1 8330.07  549.05
   2  -3  -1 7071.69  549.95
  -1  -3   1  584.94   41.00
   1  -3  -1  493.55   41.50
   1   3  -1  597.44   41.20
  -1   3   1  527.95   41.60
   0  -3   1  346.07   27.80
   0  -3  -1  400.36   28.00
   0   3  -1  362.96   28.00
   0   3   1  337.27   27.60
   1  -3   1 1589.24  115.69
  -1  -3  -1 1609.54  114.69
   1   3   1 1484.55  114.59
  -1   3  -1 1686.63  115.99
  -2  -3  -1  937.21   70.19
   2  -3   1  886.51   71.79
  -2   3  -1 1024.10   72.39
   2   3   1 1025.90   70.39
  -3  -3  -1    7.80    1.80
   3   3   1   10.60    2.00
  -3   3  -1   10.40    4.10
   4  -3   1  103.29   11.90
  -4   3  -1  108.89   12.20
   4   3   1  116.49    8.80
   4   3   1  105.59    8.90
   5  -3   1   21.40    5.60
   5   3   1   22.50    2.30
   5   3   1   24.40    2.30
  -5   3  -1   15.50    5.50
   6  -3   1    6.60    4.90
  -6   3  -1   15.50    6.30
   7  -3   1    3.70    4.90
  -7   3  -1    3.40    5.90
   8  -3   1    3.30    6.50
  -8   3  -1    3.00    7.10
   9  -3   1   99.59   13.90
  -9   3  -1   88.99   15.20
  10  -3   1   93.99   14.90
 -10   3  -1   97.69   16.10
  11  -3   1    6.90   10.20
 -11   3  -1   26.30   13.10
  12  -3   1    2.90   12.00
  13  -3   1   33.40   14.00
  12  -4  -1   24.00   13.80
 -12   4   1   12.20   15.40
 -11   4   1   84.19   17.60
  10  -4  -1   -9.50    8.60
 -10   4   1  -13.40   10.30
   9  -4  -1  324.07   29.60
  -9   4   1  278.77   30.00
   8  -4  -1   14.00    7.40
  -8   4   1    8.50    8.20
  -7   4   1  353.06   31.90
   6  -4  -1  516.35   41.80
  -6   4   1  499.25   42.10
   5  -4  -1  221.58   20.50
  -5   4   1  201.18   20.00
  -4   4   1   13.90    4.90
  -3  -4   1    1.20    1.20
   3  -4  -1   -0.10    3.00
   3   4  -1    1.70    1.30
  -3   4   1    3.30    3.20
   2  -4  -1  151.18   14.30
  -2  -4   1  143.69   12.50
  -2   4   1  157.38   14.30
   2   4  -1  155.78   12.90
   1  -4  -1 1152.08   87.59
  -1  -4   1 1263.97   90.39
  -1   4   1 1180.08   87.69
   1   4  -1 1176.38   86.99
   0  -4   1 9999.00  681.93
   0  -4  -1 9909.51  681.83
   0   4   1 9363.96  681.73
   0   4  -1 8975.00  681.93
  -1  -4  -1 8517.85  604.84
   1  -4   1 8945.41  605.84
  -1   4  -1 7283.07  605.24
   1   4   1 9175.78  604.84
  -2  -4  -1   93.29    8.90
   2  -4   1   93.89   10.50
  -2   4  -1  105.69   11.00
   2   4   1  100.59    9.10
  -3  -4  -1  721.33   58.59
   3   4   1  854.51   58.79
  -3   4  -1  851.61   61.89
  -4  -4  -1    3.00    1.50
  -4   4  -1    1.90    3.80
   4   4   1    5.10    1.80
   5  -4   1  911.51   69.69
  -5   4  -1  899.11   70.09
   6  -4   1  230.88   23.40
  -6   4  -1  275.57   25.00
   7  -4   1   -2.00    5.60
  -7   4  -1   -1.10    6.10
   8  -4   1  627.14   53.69
  -8   4  -1  692.73   55.29
   9  -4   1  123.99   17.60
  -9   4  -1  128.29   18.90
  10  -4   1   63.89   13.50
 -10   4  -1   36.20   13.50
 -11   4  -1  -11.90   13.10
  12  -4   1   13.60   14.00
 -12   4  -1  -18.40   16.10
  13  -4   1  -25.80   24.00
  13  -5  -1   15.20   18.80
 -13   5   1  -14.00   19.80
  12  -5  -1   33.90   16.30
 -12   5   1   49.10   19.80
  11  -5  -1   31.40   14.70
 -11   5   1   57.19   17.20
  10  -5  -1  164.38   22.60
 -10   5   1  180.28   25.10
   9  -5  -1   88.19   15.60
  -9   5   1   67.69   14.70
   8  -5  -1   37.20   10.20
   7  -5  -1  158.48   18.60
  -7   5   1  161.68   19.40
   6  -5  -1   -5.10    5.50
  -6   5   1    2.50    5.10
   5  -5  -1  139.39   18.90
  -5   5   1  122.29   15.30
   4  -5  -1   -1.40    3.60
  -4  -5   1    0.50    1.30
  -4   5   1   -1.70    3.60
   4   5  -1    1.20    1.70
  -3  -5   1  445.66   37.90
   3  -5  -1  574.54   41.60
  -3   5   1  509.05   40.80
   3   5  -1  538.95   38.60
   2  -5  -1 1026.60   76.39
  -2  -5   1  996.90   74.49
  -2   5   1  952.50   75.99
   2   5  -1 1076.59   74.99
   1  -5  -1 1251.57   84.79
  -1  -5   1 1166.48   83.49
  -1   5   1  992.00   83.89
   1   5  -1 1128.29   83.69
   0  -5  -1  935.81   64.79
   0   5   1  750.02   58.79
   0   5  -1  719.73   58.89
   1  -5   1   51.49    7.60
  -1  -5  -1   40.90    6.20
  -1   5  -1   36.80    6.90
   1   5   1   49.60    6.70
   2  -5   1  283.77   24.80
  -2  -5  -1  272.07   23.00
  -2   5  -1  304.27   25.40
   2   5   1  298.97   23.20
  -3  -5  -1    1.10    1.90
   3  -5   1    3.80    3.40
   3   5   1    1.90    2.00
  -3   5  -1    1.90    4.20
  -4  -5  -1   31.00    4.30
   4   5   1   33.20    4.40
  -4   5  -1   36.10    8.00
   5   5   1  115.99    9.00
   5   5   1  106.59    9.00
  -5   5  -1  118.39   14.40
   6  -5   1   19.80    7.70
  -6   5  -1   25.40    8.30
   7  -5   1   45.50   10.60
  -7   5  -1   80.79   14.20
   8  -5   1  101.59   16.40
  -8   5  -1  114.39   19.80
   9  -5   1  -11.20    8.70
  -9   5  -1   -7.10   10.50
  10  -5   1   32.80   11.70
 -10   5  -1   25.20   13.70
  11  -5   1   33.40   14.50
 -11   5  -1   37.60   17.00
  12  -5   1   -1.70   15.60
 -12   5  -1   42.50   19.70
  13  -5   1    8.00   19.10
 -13   5  -1  -13.80   21.50
  13  -6  -1   -9.40   22.20
  12  -6  -1   61.99   18.10
 -12   6   1   25.60   22.80
  11  -6  -1   11.70   14.30
 -11   6   1  -11.50   15.20
  10  -6  -1   -1.00   10.70
 -10   6   1   -7.30   12.00
   9  -6  -1  213.48   25.60
  -9   6   1  220.38   26.80
   8  -6  -1  383.56   35.80
  -8   6   1  371.16   36.30
   7  -6  -1  129.59   18.70
  -7   6   1  149.69   19.80
   6  -6  -1   46.00   10.80
  -6   6   1   77.09   13.30
   5  -6  -1    7.70    5.30
  -5  -6   1    6.10    1.70
  -5   6   1    8.40    5.60
   5   6  -1    9.90    2.00
  -4  -6   1    4.90    2.40
   4  -6  -1    4.60    4.70
  -4   6   1   -2.30    4.00
   4   6  -1    1.70    2.40
  -3  -6   1  879.31   73.19
   3  -6  -1 1037.60   76.69
  -3   6   1 1080.89   76.69
   3   6  -1 1028.10   73.99
   2  -6  -1  282.57   23.30
  -2  -6   1  243.38   21.00
  -2   6   1  227.58   22.30
   2   6  -1  258.47   21.50
  -1  -6   1 3130.39  229.18
  -1   6   1 3269.57  230.28
   1   6  -1 3134.49  229.58
   0  -6   1 3415.56  227.28
   0  -6  -1 3337.47  227.28
   0   6  -1 3036.80  227.28
   0   6   1 2773.42  226.58
  -1  -6  -1   41.20    6.70
   1   6   1   39.30    6.50
  -1   6  -1   35.70    7.10
   2  -6   1  107.49   12.90
  -2  -6  -1  130.29   11.80
   2   6   1  105.59   11.50
  -2   6  -1  130.29   14.00
  -3  -6  -1  627.04   47.90
   3  -6   1  607.64   50.39
  -3   6  -1  656.93   51.19
   3   6   1  644.24   48.00
   4  -6   1  495.45   35.60
  -4  -6  -1  351.16   30.30
  -4   6  -1  367.76   34.20
   4   6   1  407.66   30.50
  -5  -6  -1  106.29    9.70
   5   6   1  107.49    9.70
  -5   6  -1  151.38   16.40
   6  -6   1  122.19   16.80
  -6   6  -1  108.59   16.60
   7  -6   1  164.88   20.10
  -7   6  -1  154.08   21.50
   8  -6   1  997.40   77.59
  -8   6  -1  926.61   77.99
   9  -6   1   21.30   11.50
  -9   6  -1   44.60   13.50
  10  -6   1   17.60   12.60
 -10   6  -1   11.80   13.20
  11  -6   1   15.50   15.10
 -11   6  -1    1.20   16.60
  12  -6   1   11.90   17.50
 -12   6  -1   10.90   20.20
  12  -7  -1   23.10   22.40
 -12   7   1    0.30   21.90
  11  -7  -1  -13.60   13.90
 -11   7   1   16.90   17.00
  10  -7  -1  242.58   29.40
 -10   7   1  199.98   28.60
   9  -7  -1   53.49   17.30
  -9   7   1   89.69   18.20
   8  -7  -1  357.16   34.50
  -8   7   1  325.77   34.30
   7  -7  -1  455.35   43.40
  -7   7   1  536.25   44.90
  -6   7   1  115.09   17.50
  -5  -7   1  321.47   25.90
   5  -7  -1  360.06   31.90
  -5   7   1  372.16   32.10
   5   7  -1  331.07   26.30
   4  -7  -1   22.10    7.60
  -4  -7   1   24.40    4.80
   4   7  -1   39.40    6.10
  -4   7   1   33.80    8.90
   3  -7  -1 1144.39   95.69
  -3  -7   1 1338.67   93.49
  -3   7   1 1246.08   96.09
   3   7  -1 1314.97   93.89
  -2  -7   1 1927.51  139.69
   2   7  -1 1973.60  140.29
  -2   7   1 1831.52  141.29
  -1  -7   1   -4.80    2.70
   1  -7  -1    3.40    4.10
  -1   7   1    1.40    3.80
   1   7  -1   -3.80    3.10
   0  -7  -1 1373.06   93.29
   0  -7   1 1277.87   92.99
   0   7   1 1072.39   92.09
   0   7  -1 1244.18   93.19
   1  -7   1 3028.10  209.98
  -1  -7  -1 2871.41  208.68
  -1   7  -1 2914.61  210.28
   1   7   1 2706.73  208.48
  -2  -7  -1 2080.49  171.68
   2   7   1 2528.75  172.38
  -2   7  -1 2520.55  174.88
  -3  -7  -1 1224.08   91.59
   3  -7   1 1220.78   94.39
  -3   7  -1 1248.28   94.89
   3   7   1 1262.97   91.69
  -4  -7  -1    2.00    3.00
   4  -7   1    0.50    5.70
   4   7   1    6.30    3.30
  -4   7  -1    6.60    6.00
   5  -7   1   12.80    7.10
  -5  -7  -1   16.00    3.90
  -5   7  -1   22.80    9.00
   5   7   1   30.90    4.90
  -6   7  -1  491.15   43.50
   7  -7   1   88.49   16.30
  -7   7  -1  121.49   18.20
   8  -7   1   -4.90    9.00
  -8   7  -1    8.30   10.40
  -9   7  -1  126.29   21.20
  10  -7   1    3.40   13.40
 -10   7  -1   16.90   14.90
  11  -7   1    1.50   15.70
 -11   7  -1    2.10   18.10
  12  -7   1  -11.70   26.40
 -12   7  -1    3.60   21.70
  12  -8  -1    6.60   21.60
 -12   8   1   23.80   24.40
  11  -8  -1   28.80   17.80
 -11   8   1  -22.60   19.00
  10  -8  -1   62.79   18.30
 -10   8   1   53.99   18.40
   9  -8  -1   31.00   13.90
  -9   8   1   36.50   14.70
   8  -8  -1   32.70   12.40
  -8   8   1   27.30   12.90
  -7   8   1   20.20    9.50
   6  -8  -1  203.08   23.10
  -6   8   1  178.98   22.30
   6   8  -1  183.58   14.60
  -5  -8   1   27.40    5.10
   5  -8  -1   33.90   10.30
  -5   8   1   48.20   11.20
   4  -8  -1   37.70    9.20
  -4  -8   1   25.90    5.40
  -4   8   1   25.20    8.40
   4   8  -1   17.50    5.20
   3  -8  -1  162.48   32.70
  -3  -8   1  233.28   21.30
   3   8  -1  278.27   22.30
  -3   8   1  240.18   24.20
  -2  -8   1  404.26   33.30
   2  -8  -1  431.56   35.60
  -2   8   1  379.76   35.00
   2   8  -1  403.86   33.90
  -1  -8   1  701.63   54.69
   1  -8  -1  763.32   56.19
  -1   8   1  750.32   55.99
   1   8  -1  602.44   54.59
   0  -8  -1  102.19   12.70
   0  -8   1  103.19   12.50
   0   8   1  101.29   12.70
   0   8  -1  117.89   13.90
  -1  -8  -1   -1.60    3.20
   1  -8   1   -3.80    4.10
  -1   8  -1    6.10    4.40
   1   8   1   -0.90    3.90
  -2  -8  -1  200.58   19.40
   2  -8   1  221.88   21.50
   2   8   1  209.28   19.40
  -2   8  -1  196.88   21.40
  -3  -8  -1    2.30    3.80
  -3   8  -1   -0.40    5.00
   3   8   1    5.60    3.80
   4  -8   1   50.29   10.70
  -4  -8  -1   65.19    8.90
  -4   8  -1   80.49   13.60
   4   8   1   58.79    8.70
  -5  -8  -1   54.39   10.40
   5  -8   1   68.29   12.80
   5   8   1   47.10    7.50
  -5   8  -1   69.89   13.60
   6  -8   1    0.00    7.80
  -6  -8  -1    4.10    3.00
  -6   8  -1   -2.80    7.80
   6   8   1    2.30    3.10
  -7   8  -1    1.50    8.90
   8  -8   1   25.30   11.70
  -8   8  -1   34.60   13.30
   9  -8   1   79.69   17.90
  -9   8  -1   44.20   16.90
  10  -8   1   49.40   18.00
 -10   8  -1   11.50   16.80
  11  -8   1   12.40   18.60
 -11   8  -1   12.10   21.00
  12  -8   1  -10.70   23.90
  11  -9  -1   13.90   19.30
 -11   9   1    0.70   20.70
 -10   9   1   17.50   16.90
   9  -9  -1  175.88   26.90
  -9   9   1  191.38   28.10
  -8   9   1   73.19   16.70
   7  -9  -1   80.69   15.80
  -7   9   1   40.60   13.70
  -6  -9   1  254.47   22.70
   6  -9  -1  328.37   31.00
   6   9  -1  305.17   23.30
  -6   9   1  286.47   30.40
   5  -9  -1  448.76   42.20
  -5  -9   1  449.95   36.80
  -5   9   1  515.15   43.10
   5   9  -1  469.45   37.30
  -4  -9   1  151.28   15.30
  -4   9   1  141.49   19.70
   4   9  -1  143.99   17.00
  -3  -9   1  506.05   39.00
   3  -9  -1  432.76   41.30
  -3   9   1  451.15   41.40
   3   9  -1  505.85   39.60
   2  -9  -1  373.76   36.20
  -2  -9   1  447.76   35.50
  -2   9   1  473.75   37.90
   2   9  -1  390.46   35.20
   1  -9  -1  335.87   28.40
  -1  -9   1  272.57   26.40
  -1   9   1  296.67   27.70
   1   9  -1  288.97   27.30
   0  -9  -1    9.90    5.70
   0  -9   1   21.10    6.90
   0   9   1    6.30    5.00
   0   9  -1    7.90    5.30
  -1  -9  -1   13.70    5.80
   1  -9   1    4.90    5.50
   1   9   1    8.30    4.90
  -1   9  -1   13.50    7.20
  -2  -9  -1  506.55   40.90
   2  -9   1  469.75   42.10
   2   9   1  503.15   40.80
  -2   9  -1  505.15   43.20
   3  -9   1   73.79   13.80
  -3  -9  -1   77.39   10.90
   3   9   1   81.49   11.70
  -3   9  -1   86.69   14.70
  -4  -9  -1   31.00    7.90
  -4   9  -1   23.60    9.20
   4   9   1   20.60    5.70
  -5  -9  -1   11.90    5.20
   5  -9   1   -1.30    7.30
  -5   9  -1    0.80    8.00
   5   9   1    6.20    4.40
  -6  -9  -1    1.10    3.60
   6  -9   1    5.60    9.40
  -6   9  -1    5.90    9.10
   6   9   1    5.20    4.10
   7  -9   1    5.70   10.20
  -7   9  -1   22.20   12.10
  -8   9  -1   -3.40   11.50
   9  -9   1   56.29   17.40
  -9   9  -1   51.79   16.50
 -10   9  -1   80.49   23.30
  11  -9   1   24.30   20.60
 -11   9  -1   29.50   22.00
  11 -10  -1   38.20   22.30
 -11  10   1    3.10   23.30
  10 -10  -1    7.80   17.60
 -10  10   1    4.70   18.80
   9 -10  -1   68.69   20.70
  -9  10   1  127.89   23.10
   8 -10  -1   11.50   12.40
  -8  10   1   64.59   17.00
   7 -10  -1   60.79   16.00
  -7  10   1   62.59   16.80
  -6 -10   1   86.29   10.60
   6 -10  -1   80.49   16.10
   6  10  -1   90.79   11.20
  -6  10   1  107.29   18.50
  -5 -10   1  155.58   16.70
   5  10  -1  173.58   17.30
  -5  10   1  182.48   24.00
  -4 -10   1 1010.20   82.09
   4 -10  -1 1130.99   86.79
  -4  10   1 1108.69   86.79
   4  10  -1 1119.69   82.99
   3 -10  -1  109.49   17.30
  -3 -10   1  103.79   14.40
   3  10  -1  137.99   18.90
  -3  10   1  114.99   17.80
   2 -10  -1  189.98   21.70
  -2 -10   1  177.38   20.00
   2  10  -1  193.48   20.40
  -2  10   1  210.98   22.20
   1 -10  -1   30.70    8.80
  -1 -10   1   34.20    8.70
  -1  10   1   19.20    7.70
   1  10  -1   29.80    8.50
   0 -10   1   69.39   12.50
   0 -10  -1   99.09   14.20
   0  10   1   75.89   13.30
   0  10  -1   84.59   13.60
  -1 -10  -1   13.00    6.40
   1 -10   1   19.70    7.90
   1  10   1   12.90    6.60
  -1  10  -1   12.30    6.60
   2 -10   1  169.48   21.30
  -2 -10  -1  208.98   20.90
  -2  10  -1  242.58   23.70
   2  10   1  188.98   19.90
   3 -10   1   20.20    9.10
  -3 -10  -1   26.50    8.00
   3  10   1   16.90    6.90
  -3  10  -1   -0.60    7.70
  -4 -10  -1   35.60    8.00
   4 -10   1   25.70    9.90
  -4  10  -1   38.50   11.60
   4  10   1   29.50    7.50
  -5 -10  -1  182.28   18.60
  -5  10  -1  208.58   24.80
   5  10   1  184.68   18.60
  -6 -10  -1  279.07   23.40
   6 -10   1  333.57   32.10
  -6  10  -1  269.47   31.40
   6  10   1  241.08   23.20
  -7 -10  -1   13.60    3.60
   7 -10   1   21.20   14.10
   7  10   1   15.50    3.70
  -7  10  -1    2.40   11.30
   8 -10   1   -1.20   12.50
  -8  10  -1  -11.30   12.30
   9 -10   1  227.18   31.90
  -9  10  -1  206.08   30.50
  10 -10   1   76.59   22.10
 -10  10  -1  -29.90   18.70
  11 -10   1  -11.20   23.10
 -11  10  -1    7.30   23.90
  10 -11  -1  132.59   27.70
 -10  11   1  140.49   27.90
  -9  11   1   13.80   17.40
   8 -11  -1   46.30   16.80
  -8  11   1   49.50   17.90
   7 -11  -1    2.50   12.10
  -7 -11   1    5.10    4.10
   7  11  -1    2.80    4.20
  -7  11   1   13.20   12.90
  -6 -11   1    1.60    5.10
   6  11  -1   -4.00    5.80
  -6  11   1    3.20   10.90
  -5 -11   1  268.77   25.30
   5 -11  -1  278.47   30.60
   5  11  -1  265.27   25.80
  -5  11   1  317.17   31.80
  -4 -11   1   25.90    7.90
   4 -11  -1   25.10   10.80
   4  11  -1   27.40    8.00
  -4  11   1   29.90   10.80
  -3 -11   1  316.37   28.70
   3 -11  -1  354.96   32.30
   3  11  -1  303.97   28.90
  -3  11   1  267.07   30.80
  -2 -11   1  403.96   37.50
   2 -11  -1  429.36   39.40
  -2  11   1  471.55   40.40
   2  11  -1  423.06   38.50
  -1 -11   1   64.69   12.10
   1 -11  -1   75.19   13.70
  -1  11   1   57.69   11.70
   1  11  -1   43.20   11.10
   0 -11   1   16.70    8.10
   0 -11  -1   20.70    8.10
   0  11  -1   25.70    8.10
   0  11   1   20.60    8.50
  -1 -11  -1  318.57   29.80
   1 -11   1  351.06   31.20
  -1  11  -1  332.37   31.20
   1  11   1  252.97   28.50
   2 -11   1 1973.00  156.98
  -2 -11  -1 2287.77  159.48
   2  11   1 2004.10  155.48
  -2  11  -1 2125.49  158.38
  -3 -11  -1   77.39   12.50
   3 -11   1   68.89   14.00
  -3  11  -1   68.69   14.90
   3  11   1   96.29   14.00
   4 -11   1   27.60   12.00
  -4 -11  -1   56.09    9.90
   4  11   1   39.00    9.90
  -4  11  -1   69.99   15.40
  -5 -11  -1  334.37   27.00
   5 -11   1  217.58   29.60
  -5  11  -1  281.37   32.20
   5  11   1  284.57   26.20
  -6 -11  -1  224.98   21.30
  -6  11  -1  250.57   29.40
   6  11   1  217.68   21.60
  -7 -11  -1   13.80    4.60
   7 -11   1    9.00   13.40
  -7  11  -1   -3.70   11.90
   7  11   1    7.70    5.60
   8 -11   1   29.40   17.70
  -8  11  -1   37.50   17.40
  -9  11  -1   19.70   17.80
  10 -11   1  141.09   27.00
 -10  11  -1   97.89   26.90
 -10  12   1   42.00   23.70
   9 -12  -1   -3.40   18.00
  -9  12   1   -2.80   18.50
   8 -12  -1    9.60   15.90
  -8  12   1   14.00   16.60
   7 -12  -1   23.20   17.50
  -7 -12   1   34.50    7.10
  -7  12   1   37.90   14.80
   7  12  -1   32.50    7.60
   6 -12  -1  327.07   41.00
  -6 -12   1  441.26   35.30
   6  12  -1  428.66   35.90
  -6  12   1  440.96   43.50
  -5 -12   1   35.10    9.70
   5 -12  -1   35.40   13.80
   5  12  -1   32.10    9.90
  -5  12   1   39.10   13.90
  -4 -12   1   93.99   14.10
   4 -12  -1   51.29   15.20
  -4  12   1   75.59   16.80
   4  12  -1   61.89   12.70
  -3 -12   1   77.59   14.10
   3 -12  -1  127.39   20.10
  -3  12   1  104.99   18.10
   3  12  -1   85.99   14.80
   2 -12  -1   -3.30    8.20
  -2 -12   1    5.60    7.40
   2  12  -1   -4.20    7.10
  -2  12   1   10.40    8.20
  -1 -12   1  125.79   21.50
   1 -12  -1  126.89   18.90
  -1  12   1  132.49   19.90
   1  12  -1  116.69   18.10
   0 -12  -1  146.69   20.10
   0 -12   1  131.79   19.50
   0  12  -1  148.19   20.50
   0  12   1  122.69   19.20
   1 -12   1   -4.00    7.00
   1  12   1    5.90    7.70
  -1  12  -1   12.70    7.70
   2 -12   1   84.09   15.60
  -2 -12  -1   96.09   15.20
   2  12   1   74.69   14.10
  -2  12  -1   96.29   16.90
   3 -12   1   78.09   16.00
  -3 -12  -1   63.89   12.70
   3  12   1   61.39   12.50
  -3  12  -1   72.39   15.30
   4 -12   1   34.10   12.10
  -4 -12  -1   32.80    9.50
   4  12   1   25.70    9.00
  -4  12  -1   40.40   14.00
   5 -12   1   20.80   12.60
  -5 -12  -1   22.60    7.90
   5  12   1   19.50    8.70
  -5  12  -1    9.00   12.00
  -6 -12  -1  476.55   38.30
   6 -12   1  473.25   46.80
  -6  12  -1  377.56   44.40
   6  12   1  465.75   38.50
  -7 -12  -1   -5.40    5.60
   7  12   1   -1.70    6.30
  -7  12  -1   13.90   13.80
   8 -12   1  -33.70   15.30
  -8  12  -1  -36.70   15.90
   9 -12   1   33.20   21.30
  -9  12  -1   -6.10   19.20
 -10  12  -1   38.20   24.50
  10 -13  -1   -2.80   23.20
 -10  13   1   -6.80   28.00
   9 -13  -1   33.40   23.50
  -9  13   1   28.30   21.80
   8 -13  -1   53.89   22.00
  -8  13   1   14.40   18.80
   7 -13  -1  298.17   39.50
  -7 -13   1  337.67   28.30
  -7  13   1  349.17   39.60
   7  13  -1  294.47   28.30
   6 -13  -1   53.09   17.10
  -6 -13   1   59.89   11.80
   6  13  -1   70.59   12.80
  -6  13   1   55.19   17.00
   5 -13  -1   86.39   18.60
   5  13  -1   63.59   13.40
  -5  13   1   80.89   18.80
   4 -13  -1    2.70   11.80
  -4 -13   1   -2.90    7.30
  -4  13   1   -1.80   10.80
   4  13  -1    7.00    8.50
  -3 -13   1   25.00    9.30
   3 -13  -1   28.00   12.80
   3  13  -1   16.90    9.30
  -3  13   1   25.60   11.20
  -2 -13   1   27.20   10.40
   2 -13  -1   45.90   13.60
   2  13  -1   25.40   10.40
  -2  13   1   47.60   13.80
  -1 -13   1  118.69   18.70
   1 -13  -1  135.49   20.00
  -1  13   1  128.49   20.50
   1  13  -1   84.19   16.00
   0 -13   1   65.49   24.00
   0  13   1   51.49   12.50
   0  13  -1   42.00   11.80
  -1 -13  -1    4.90    8.50
   1 -13   1   20.50   10.60
  -1  13  -1   18.80    8.90
   1  13   1    7.50    8.50
  -2 -13  -1   24.40   10.40
   2 -13   1   30.40   11.30
   2  13   1   30.80   10.50
  -2  13  -1   27.90   13.00
  -3 -13  -1    0.60    7.50
   3 -13   1    2.10    9.90
   3  13   1   -0.90    8.20
  -3  13  -1   11.90   10.50
   4 -13   1  441.26   40.60
  -4  13  -1  345.87   38.90
   4  13   1  350.56   34.80
   5 -13   1   99.19   21.30
  -5  13  -1  136.39   23.50
   5  13   1  115.39   16.50
  -6 -13  -1   49.00   11.10
   6 -13   1   60.49   17.50
  -6  13  -1   15.80   15.50
   6  13   1   45.80   13.30
   7 -13   1  230.08   34.20
  -7 -13  -1  234.08   22.90
  -7  13  -1  234.78   34.80
   7  13   1  243.18   23.40
   8 -13   1   -9.50   20.30
  -8  13  -1  -15.80   17.50
   9 -13   1   -3.20   21.10
  -9  13  -1   15.90   21.90
  10 -13   1    8.90   28.60
   9 -14  -1  -41.80   23.80
  -8 -14   1  123.39   12.00
   8 -14  -1  144.59   29.60
  -8  14   1  150.88   31.70
   7 -14  -1   -4.40   18.70
  -7 -14   1    6.40    8.60
  -7  14   1  -18.50   16.00
   7  14  -1   -1.80    8.70
   6 -14  -1   99.79   23.30
  -6 -14   1  148.39   18.10
  -6  14   1  152.68   26.70
   6  14  -1   94.79   16.70
   5 -14  -1  -16.40   12.50
   5  14  -1   13.90   11.40
  -5  14   1   34.70   15.20
   4 -14  -1  261.57   31.20
  -4  14   1  200.78   30.90
   4  14  -1  234.68   27.50
  -3 -14   1  142.99   19.90
   3 -14  -1  134.39   23.40
   3  14  -1  168.48   22.90
  -3  14   1  118.39   22.50
  -2 -14   1   47.20   12.60
   2 -14  -1    1.70    9.90
  -2  14   1   36.80   12.20
   2  14  -1   39.60   12.70
  -1 -14   1  194.38   24.80
   1 -14  -1  181.38   25.90
   1  14  -1  130.59   22.60
  -1  14   1  167.98   25.00
   0 -14  -1  648.64   58.39
   0 -14   1  671.03   59.09
   0  14  -1  681.73   59.89
   0  14   1  721.53   60.19
   1 -14   1 1110.89   85.79
  -1 -14  -1  989.00   83.59
  -1  14  -1 1008.60   85.49
   1  14   1 1051.89   84.59
   2 -14   1  -13.30   10.60
  -2 -14  -1    5.70    9.50
  -2  14  -1    1.90   11.60
   2  14   1    9.60   10.20
  -3 -14  -1   53.59   12.80
   3 -14   1   52.69   16.60
   3  14   1   38.20   13.00
  -3  14  -1   59.29   17.10
   4 -14   1    8.90   12.30
  -4  14  -1  -18.80   12.10
   4  14   1    1.60    9.00
   5 -14   1  -25.30   13.00
  -5  14  -1   11.40   13.10
  -6 -14  -1   26.40   10.30
   6 -14   1    8.30   16.20
  -6  14  -1   29.10   17.30
   6  14   1    9.70   10.00
   7 -14   1    2.00   18.70
  -7 -14  -1   11.00    8.90
   7  14   1   26.10    9.90
  -7  14  -1   19.10   18.60
  -8 -14  -1   16.50    5.90
   8 -14   1   19.80   22.10
   8  14   1   14.00    9.00
  -8  14  -1  -26.80   19.20
   9 -14   1  -17.20   24.10
  -9  14  -1   20.10   28.90
   9 -15  -1   17.00   29.20
  -9  15   1   27.40   28.60
   8 -15  -1   21.70   23.40
  -8  15   1  -16.10   22.20
   7 -15  -1  -17.30   20.10
  -7  15   1    6.30   20.00
  -6 -15   1  170.68   22.20
   6 -15  -1  218.68   31.90
  -6  15   1  191.48   31.20
   6  15  -1  131.19   21.10
   5 -15  -1   51.29   17.50
   5  15  -1   18.40   11.80
  -5  15   1   26.80   16.70
   4 -15  -1   13.30   15.30
  -4  15   1   68.79   17.00
  -3 -15   1  259.77   30.70
   3 -15  -1  226.68   32.60
  -3  15   1  255.97   38.60
   3  15  -1  285.37   31.50
  -2 -15   1   -1.70   10.70
   2 -15  -1   -2.60   10.80
  -2  15   1  -22.10   11.90
   2  15  -1   -1.10   10.80
   1 -15  -1    2.10    9.90
  -1 -15   1   -1.00   10.50
  -1  15   1    7.00   11.30
   1  15  -1   -6.30   11.10
   0 -15  -1  113.59   20.10
   0 -15   1   88.99   17.90
   0  15   1   83.99   17.90
   0  15  -1   68.59   17.70
  -1 -15  -1   13.50   12.70
   1 -15   1   33.40   12.50
  -1  15  -1   -0.70   10.40
   1  15   1   26.20   12.60
  -2 -15  -1  232.58   28.90
   2 -15   1  221.38   31.90
   2  15   1  261.87   30.30
  -2  15  -1  228.88   33.00
  -3 -15  -1  267.97   31.20
   3 -15   1  311.67   38.40
  -3  15  -1  249.48   38.90
   3  15   1  281.77   31.30
   4 -15   1    5.30   15.00
  -4  15  -1    7.00   15.00
   4  15   1   -9.50   12.30
   5 -15   1    6.30   16.00
  -5  15  -1   19.10   15.10
   5  15   1   26.70   12.70
  -6 -15  -1  109.39   18.40
   6 -15   1  108.59   26.90
  -6  15  -1  124.99   25.60
   6  15   1  126.19   19.00
   7 -15   1   32.10   21.10
  -7  15  -1   36.80   23.20
   8 -15   1  -62.69   23.20
  -8  15  -1   20.80   23.90
   9 -15   1   41.20   29.80
   8 -16  -1   23.30   29.40
  -8  16   1   28.20   27.60
   7 -16  -1   65.19   27.00
  -7  16   1   77.39   25.80
   6 -16  -1   -6.30   19.10
  -6  16   1  -14.10   18.60
  -5 -16   1   -2.20   11.30
   5 -16  -1   17.80   18.40
   5  16  -1    6.20   12.90
  -5  16   1   12.50   16.70
  -4  16   1  332.27   42.60
   4  16  -1  328.07   36.90
   3 -16  -1   -9.10   13.60
   3  16  -1   19.60   15.80
  -3  16   1   -5.50   13.90
  -2 -16   1   16.10   14.20
   2 -16  -1   12.90   14.60
   2  16  -1   26.70   13.80
  -2  16   1    5.30   13.10
   1 -16  -1   23.60   14.10
  -1 -16   1   33.10   14.40
   1  16  -1   -9.10   11.60
  -1  16   1    9.70   13.80
   0 -16   1   15.20   13.80
   0 -16  -1   -4.90   13.60
   0  16  -1   -2.80   12.00
   0  16   1    8.60   13.00
  -1 -16  -1    8.70   13.00
   1 -16   1   10.80   14.20
  -1  16  -1    7.20   13.10
   1  16   1   14.60   13.20
   2 -16   1   51.29   16.70
  -2 -16  -1   24.90   16.20
   2  16   1   54.89   16.30
  -2  16  -1   39.20   18.20
   3 -16   1    0.00   15.00
   3  16   1   10.10   12.20
  -3  16  -1  -16.30   14.00
   4 -16   1    9.20   17.50
  -4 -16  -1   -1.40   11.70
  -4  16  -1    6.00   16.50
   4  16   1   12.10   13.10
  -5 -16  -1    5.90   11.80
   5 -16   1   -3.70   17.50
  -5  16  -1  -15.10   17.10
   5  16   1    0.80   15.90
   6 -16   1  -14.90   20.00
  -6  16  -1   42.00   21.00
   7 -16   1    9.60   22.90
  -7  16  -1    7.60   24.80
   8 -16   1    3.20   25.90
  -8  16  -1  -30.60   26.60
   8 -17  -1   93.19   37.00
  -8  17   1   14.70   33.30
   7 -17  -1   85.29   30.20
  -7  17   1   33.80   28.00
   6 -17  -1  -19.70   22.20
   5 -17  -1  105.09   26.30
  -5  17   1   76.89   23.00
  -4 -17   1   13.80   14.20
   4 -17  -1    1.50   17.30
  -4  17   1   17.50   19.00
   3 -17  -1    6.80   15.60
  -3 -17   1   15.60   14.40
   3  17  -1   33.50   16.60
  -3  17   1   60.79   19.80
   2 -17  -1   48.70   19.40
  -2 -17   1   21.40   17.80
  -2  17   1    9.10   17.80
   2  17  -1   27.00   15.30
   1 -17  -1  -12.90   14.90
  -1  17   1   13.70   15.50
   1  17  -1    8.80   15.60
   0 -17   1   10.50   14.40
   0 -17  -1    4.30   14.80
   0  17   1   -7.00   14.10
   0  17  -1    0.10   15.10
   1 -17   1  -14.60   13.50
  -1  17  -1  -29.10   15.00
   1  17   1    9.60   14.40
  -2 -17  -1    7.80   14.00
   2 -17   1  -24.30   16.40
  -2  17  -1    9.90   17.60
   2  17   1   11.20   14.40
   3 -17   1  -12.30   16.60
  -3 -17  -1   33.60   15.20
  -3  17  -1   39.20   19.00
   3  17   1   15.20   14.70
  -4 -17  -1  120.69   22.80
   4 -17   1   77.79   25.00
  -4  17  -1   54.89   22.60
   5 -17   1   -1.50   19.20
  -5  17  -1   33.20   22.20
   6 -17   1   24.90   22.60
  -6  17  -1  -30.30   25.00
   7 -17   1   65.49   31.30
  -7  17  -1   89.69   32.00
   8 -17   1  155.58   43.40
   7 -18  -1  -33.70   34.90
  -7  18   1  -54.29   29.10
   6 -18  -1  -24.50   25.80
  -6  18   1   12.90   26.20
   5 -18  -1   51.09   27.00
  -5  18   1  -10.50   21.20
   4 -18  -1   26.70   23.40
  -4  18   1    6.00   21.30
   3 -18  -1   19.70   21.50
  -3  18   1    3.40   20.70
  -2 -18   1    2.60   16.10
   2 -18  -1   -4.30   18.10
   2  18  -1    0.30   17.40
  -2  18   1  -18.40   16.90
   1 -18  -1    0.30   18.30
  -1 -18   1  -11.00   15.60
  -1  18   1  -11.80   17.60
   1  18  -1    3.10   17.50
   1 -18   1   -6.50   17.10
  -1 -18  -1  -17.50   16.30
  -1  18  -1   -1.50   19.10
   1  18   1   14.30   16.10
   2 -18   1   10.80   17.40
  -2 -18  -1   14.10   16.30
  -2  18  -1   -7.10   19.10
   2  18   1    6.40   17.20
   3 -18   1  122.99   26.30
  -3  18  -1  143.99   30.30
   4 -18   1   -0.20   19.00
  -4  18  -1    1.70   20.30
   5 -18   1   12.90   25.70
  -5  18  -1  -28.10   23.70
   6 -18   1   38.20   28.80
  -6  18  -1  -15.50   25.30
   7 -18   1    4.30   31.80
  -7  18  -1  -30.50   28.80
   7 -19  -1   76.69   52.19
   6 -19  -1  -26.10   32.10
  -6  19   1   -6.70   28.70
   5 -19  -1  135.89   34.40
  -5  19   1   36.60   28.80
   4 -19  -1   23.60   27.60
  -4  19   1   31.50   22.80
   3 -19  -1   25.30   25.20
  -3  19   1   15.30   22.30
  -2  19   1  -39.10   20.70
  -1 -19   1   -9.60   18.50
   1 -19  -1    9.70   22.10
  -1  19   1  -19.40   19.60
   1  19  -1   47.20   21.90
   0 -19   1  -18.20   18.90
   0 -19  -1   11.50   19.50
   0  19   1   -3.80   19.60
   0  19  -1   14.70   21.80
  -1 -19  -1   11.60   19.10
   1 -19   1   22.20   20.80
  -1  19  -1   22.30   21.90
   1  19   1  -16.60   18.60
  -2  19  -1   10.60   20.70
   3 -19   1  -11.60   23.00
  -3  19  -1   18.70   24.60
   4 -19   1   40.70   28.00
  -4  19  -1   73.49   28.70
   5 -19   1   28.50   26.90
  -5  19  -1   20.10   29.70
   6 -19   1  -58.19   29.60
  -6  19  -1  -26.10   30.00
   6 -20  -1   32.30   37.70
  -6  20   1   30.90   34.00
   5 -20  -1   55.79   31.90
  -5  20   1   -8.20   32.60
  -4  20   1   44.20   36.20
   3 -20  -1    5.60   35.90
  -3  20   1   89.39   31.00
   2 -20  -1  -22.40   24.60
  -2  20   1   21.60   26.20
   1 -20  -1    3.60   22.70
  -1  20   1  -25.00   23.80
   1 -20   1   -1.30   21.60
  -1  20  -1   25.20   23.90
   2 -20   1   74.19   27.40
  -2  20  -1   45.80   26.30
   3 -20   1   77.19   42.90
  -3  20  -1   71.29   30.60
  -4  20  -1   23.60   37.00
   5 -20   1  -37.30   33.70
  -5  20  -1  -22.50   33.40
   6 -20   1  -16.50   38.10
  -6  20  -1  -52.89   36.00
   5 -21  -1   90.89   42.00
  -5  21   1   47.30   38.40
   4 -21  -1   -0.70   31.60
  -4  21   1  -68.49   33.10
   3 -21  -1  -36.50   29.20
  -3  21   1  -17.70   29.30
   3 -21   1   83.49   35.80
  -3  21  -1   36.50   34.60
   4 -21   1    1.00   35.10
  -4  21  -1  -49.90   34.80
   5 -21   1  -37.10   36.60
  -5  21  -1  -12.70   39.80
 -10   0   2   80.59    9.30
  10   0  -2   72.39    8.70
  -9   0   2  255.17   22.00
  -8   0   2  355.86   26.80
   8   0  -2  293.97   25.70
   7   0  -2 1083.39   77.79
  -7   0   2 1025.50   77.99
  -6   0   2    2.80    3.00
   6   0  -2    3.10    2.60
  -5   0   2   52.19    6.20
   5   0  -2   50.29    6.20
   4   0  -2  139.69   11.60
  -4   0   2  123.99   11.10
   3   0  -2 1793.22  126.99
  -3   0   2 1735.73  126.79
   2   0  -2  708.73   48.00
  -2   0   2  601.44   47.70
   0   0   2    1.90    1.00
  -2   0  -2   53.89    5.60
   2   0   2   46.00    5.60
  -3   0  -2  899.41   65.39
   3   0   2  868.81   65.29
   4   0   2 2689.83  189.28
  -4   0  -2 2557.74  189.18
  -5   0  -2 1301.17   96.79
   5   0   2 1283.67   95.09
  -6   0  -2  741.83   56.39
   6   0   2  739.23   55.99
  -7   0  -2  287.57   24.20
   7   0   2  271.17   23.60
   8   0   2   23.70    6.20
   9   0   2  408.76   32.80
   9   0   2  375.36   31.70
  10   0   2   95.49   11.90
  10   0   2  110.29   14.10
  11   0   2  -13.90    5.00
  11   0   2    4.30    4.90
  11  -1  -2    9.70    5.70
 -11   1   2  -12.40    7.10
  10  -1  -2    4.90    5.90
 -10   1   2    5.20    7.00
   9  -1  -2  206.48   19.70
  -9   1   2  206.88   20.60
   8  -1  -2   14.20    5.10
  -8  -1   2   11.20    3.20
   8   1  -2    7.70    2.50
  -8   1   2   -1.70    5.10
  -7  -1   2   85.59    8.20
   7  -1  -2   80.79    9.90
  -7   1   2   81.59   10.70
   7   1  -2   78.59    7.70
  -6  -1   2  249.68   20.60
   6  -1  -2  268.57   22.30
   6   1  -2  274.17   20.60
  -6   1   2  269.37   22.50
  -5  -1   2   84.19    8.20
   5  -1  -2   86.59   10.50
  -5   1   2  105.99   10.00
   5   1  -2   98.79    8.30
   4  -1  -2  199.08   17.80
  -4  -1   2  194.88   16.40
  -4   1   2  240.38   18.10
   4   1  -2  230.78   16.70
  -3  -1   2   71.79    6.30
   3  -1  -2   62.49    7.30
   3   1  -2   80.69    6.50
  -3   1   2   77.59    7.50
  -2  -1   2   15.70    2.30
  -2   1   2   16.70    3.20
   2   1  -2   15.10    2.30
  -1  -1   2 1010.00   76.49
  -1   1   2 1110.09   76.99
   0  -1   2 1693.43  128.49
   0  -1  -2 1879.21  128.49
   1  -1   2    0.40    1.20
  -1  -1  -2   -1.10    1.00
  -1   1  -2    1.80    1.60
   1   1   2    0.40    1.10
  -2   1  -2 6549.54  476.25
   2   1   2 6943.51  475.45
   2   1   2 6516.85  475.45
   3  -1   2  109.09   10.50
  -3   1  -2   96.79   10.20
   3   1   2   98.09    9.50
   3   1   2  117.29    9.80
   4  -1   2  402.66   31.50
   4   1   2  370.96   30.20
   4   1   2  407.76   31.40
  -4   1  -2  396.66   31.50
   5  -1   2  541.95   42.50
   5   1   2  542.15   41.30
   5   1   2  514.15   41.20
  -5   1  -2  582.14   42.90
   6  -1   2  125.79   13.80
   6   1   2  143.99   12.80
   6   1   2  129.99   12.80
  -6   1  -2  135.89   14.50
   7  -1   2    6.70    4.70
   7   1   2    5.50    3.60
   7   1   2    2.90    3.50
  -7   1  -2    6.30    5.40
   8  -1   2   13.40    5.70
   8   1   2   16.50    4.40
   8   1   2    1.90    3.70
  -8   1  -2    8.50    6.70
   9  -1   2   84.89   11.70
  -9   1  -2   78.49   12.90
   9   1   2   85.79    9.90
   9   1   2   76.19    9.30
  10  -1   2   45.10    9.50
  10   1   2   48.10    6.20
  10   1   2   55.69    6.30
  11  -1   2   10.90    8.20
  11  -1   2   -0.10    7.30
  12  -1   2   -2.70    6.80
  12  -2  -2   31.20    8.50
 -12   2   2   25.70   11.10
  11  -2  -2   29.90    9.20
 -11   2   2   31.90   10.40
  10  -2  -2   18.90    8.90
 -10   2   2   29.50    9.60
   9  -2  -2    1.30    5.80
  -9   2   2   13.30    7.30
   8  -2  -2  297.97   26.10
  -8   2   2  283.97   26.60
   7  -2  -2   96.09   11.70
  -7   2   2   87.09   12.00
   6  -2  -2  142.09   14.50
   5  -2  -2   -1.90    2.90
  -5   2   2   -0.50    2.90
   4  -2  -2    4.00    3.00
  -4  -2   2    5.20    1.10
  -4  -2   2    2.10    0.80
  -4   2   2    0.70    2.50
  -3  -2   2 2320.77  174.58
   3  -2  -2 2298.37  176.48
  -3  -2   2 2378.06  174.68
  -3   2   2 2816.92  176.98
  -2  -2   2 7556.94  533.05
  -2  -2   2 7494.65  533.05
  -2   2   2 7411.86  534.15
  -1  -2   2   89.39    8.60
   1  -2  -2  102.29    9.20
  -1   2   2  107.29    9.20
   1   2  -2  101.79    8.80
   0  -2   2  441.46   33.20
   0  -2  -2  471.25   33.10
   0   2   2  414.56   32.80
   0   2  -2  418.66   33.10
  -1  -2  -2 1026.40   76.09
   1  -2   2  963.20   76.79
   1   2   2 1114.09   76.29
  -1   2  -2 1083.49   77.09
  -2  -2  -2 1437.76  111.69
   2   2   2 1604.64  111.89
  -2   2  -2 1615.94  113.39
   3  -2   2   -2.80    2.40
   3   2   2    6.70    2.10
   3   2   2    7.10    2.30
  -3   2  -2    6.10    3.10
   4  -2   2  142.29   14.30
   4   2   2  161.78   12.40
   4   2   2  137.39   12.30
  -4   2  -2  125.29   13.90
   5  -2   2  265.17   24.10
   5   2   2  255.77   21.60
   5   2   2  282.17   22.00
  -5   2  -2  324.07   25.20
   6  -2   2   41.40    8.90
   6   2   2   65.89    7.00
   6   2   2   63.39    6.90
  -6   2  -2   56.89    9.90
   7  -2   2   14.40    6.10
   7   2   2   18.80    4.00
   7   2   2   25.80    4.40
  -7   2  -2   26.90    7.80
   8  -2   2   62.29   10.60
   8   2   2   68.39    7.50
  -8   2  -2   43.40   11.00
   8   2   2   70.59    7.10
   9  -2   2  110.59   15.70
  -9   2  -2  135.99   17.30
  10  -2   2    8.00    8.00
 -10   2  -2   11.40    9.70
  11  -2   2   18.80    9.00
  12  -2   2   14.00   10.70
  13  -3  -2   18.00   11.70
 -13   3   2   -7.20   14.30
  12  -3  -2  -12.60   10.40
 -12   3   2    8.00   12.20
  11  -3  -2    5.10    9.10
 -11   3   2    3.00   10.90
  10  -3  -2   12.90    8.30
 -10   3   2   -2.10    9.20
   9  -3  -2  425.86   37.70
  -9   3   2  456.15   38.70
   8  -3  -2    1.10    5.60
  -8   3   2   -3.70    5.90
   7  -3  -2   78.89   11.60
  -7   3   2  102.89   13.60
   6  -3  -2  103.59   12.60
  -6   3   2  108.19   13.10
   5  -3  -2   39.90    7.70
  -5   3   2   37.70    6.90
   4  -3  -2   29.70    5.80
  -4   3   2   25.60    5.60
  -3  -3   2    4.30    1.40
  -3  -3   2    2.80    1.30
  -3   3   2    4.60    2.70
  -2  -3   2 1122.49   80.79
   2  -3  -2 1011.50   81.89
   2   3  -2 1205.18   80.99
  -2   3   2 1103.19   82.09
  -1  -3   2  135.99   11.70
   1  -3  -2  145.69   12.40
   1   3  -2  128.29   12.60
  -1   3   2  130.09   12.20
   0  -3   2 2753.12  193.08
   0  -3  -2 2644.24  192.78
   0   3  -2 2761.22  193.18
   0   3   2 2566.14  192.68
  -1  -3  -2   68.49    7.00
   1  -3   2   74.69    7.90
  -1   3  -2   82.19    8.40
   1   3   2   51.09    7.70
   2  -3   2  653.63   48.40
  -2  -3  -2  609.74   46.50
   2   3   2  643.84   46.60
  -2   3  -2  605.24   48.20
  -3  -3  -2  106.39    9.50
  -3   3  -2  103.49   11.80
   3   3   2  106.89    9.50
   4  -3   2   26.50    6.20
   4   3   2   27.70    4.30
   4   3   2   29.60    4.20
  -4   3  -2   16.30    5.50
   5  -3   2  121.79   15.70
   5   3   2  175.38   13.50
   5   3   2  163.48   13.20
  -5   3  -2  167.48   17.10
   6  -3   2    1.60    4.40
   6   3   2    1.40    1.90
   6   3   2    2.70    2.00
  -6   3  -2    8.40    5.70
   7  -3   2  135.69   16.00
   7   3   2  127.39   10.20
  -7   3  -2  137.29   19.50
   8  -3   2  102.19   14.40
  -8   3  -2   75.99   14.10
   9  -3   2    4.80    7.80
  -9   3  -2   -2.00    8.50
  10  -3   2   -2.80    8.90
 -10   3  -2    4.40   10.80
  11  -3   2    2.90   10.70
 -11   3  -2  -10.00   12.50
  12  -3   2    2.00   12.10
  13  -3   2   44.50   15.50
  12  -4  -2  -11.70   12.30
 -12   4   2    3.40   15.00
 -11   4   2   17.50   13.30
  10  -4  -2  122.39   17.60
 -10   4   2  103.09   18.20
   9  -4  -2  304.67   30.00
  -9   4   2  325.47   31.50
   8  -4  -2  222.18   22.40
  -8   4   2  193.58   22.60
   7  -4  -2  301.17   33.60
  -7   4   2  265.77   26.30
   6  -4  -2  226.48   21.80
  -6   4   2  225.68   22.10
   5  -4  -2  725.33   55.89
  -5   4   2  699.73   55.59
  -4  -4   2  161.98   12.50
  -4  -4   2  165.28   12.60
  -4   4   2  175.68   16.40
   3  -4  -2    4.50    3.30
  -3  -4   2    3.00    1.70
  -3   4   2    5.10    3.60
   3   4  -2    7.40    2.20
   2  -4  -2 3218.48  235.68
  -2  -4   2 3233.08  234.18
  -2   4   2 3499.05  235.88
   2   4  -2 3123.49  234.28
  -1  -4   2 2617.04  209.38
   1  -4  -2 3345.27  210.78
  -1   4   2 2553.84  209.88
   1   4  -2 3157.98  209.98
   0  -4   2    1.70    2.10
   0  -4  -2    3.10    2.30
   0   4   2    1.80    2.00
   0   4  -2    1.80    2.40
   1  -4   2  836.12   63.69
  -1  -4  -2  894.51   62.79
  -1   4  -2  849.32   63.79
   1   4   2  795.62   62.49
   2  -4   2 3876.91  306.07
  -2  -4  -2 4339.97  304.57
  -2   4  -2 4182.78  306.47
   2   4   2 4595.44  304.67
  -3  -4  -2    7.80    2.50
   3  -4   2    0.60    3.80
  -3   4  -2    6.90    4.20
   3   4   2    8.80    2.60
  -4  -4  -2   26.30    4.10
   4   4   2   35.30    4.60
  -4   4  -2   31.60    7.40
   5  -4   2    2.00    4.30
   5   4   2    2.20    1.90
   5   4   2    5.10    2.20
  -5   4  -2    1.70    4.30
   6  -4   2    2.10    5.00
   6   4   2    5.00    1.80
  -6   4  -2    5.30    6.10
   6   4   2    6.10    1.80
   7  -4   2   29.40    8.60
  -7   4  -2   57.49   11.50
   8  -4   2   41.90   10.30
  -8   4  -2   50.19   12.20
   9  -4   2   29.20   10.10
  -9   4  -2   21.30   11.30
  10  -4   2   24.70   11.10
 -10   4  -2   43.40   14.30
 -11   4  -2   47.80   16.00
  12  -4   2   -5.40   14.30
 -12   4  -2   -2.10   16.90
  13  -4   2   22.10   24.90
  13  -5  -2   -1.20   19.00
 -13   5   2   40.60   20.50
  12  -5  -2   -5.30   14.60
 -12   5   2   -9.00   16.70
  11  -5  -2   68.29   16.10
 -11   5   2   87.09   18.10
  10  -5  -2    3.80   10.20
 -10   5   2   -4.90   11.60
   9  -5  -2  255.07   28.00
  -9   5   2  300.17   29.90
   8  -5  -2   14.30    8.50
   7  -5  -2   -2.10    6.10
  -7   5   2    2.60    6.90
   6  -5  -2   37.70    9.20
  -6   5   2   46.50    9.60
   5  -5  -2   53.89   12.60
  -5   5   2   49.10    9.20
   4  -5  -2   -0.20    3.90
  -4  -5   2    6.20    2.00
  -4   5   2    3.80    3.80
   4   5  -2   14.20    2.80
   3  -5  -2   10.30    4.50
  -3  -5   2    6.20    2.40
   3   5  -2   10.60    3.20
  -3   5   2   24.10    5.90
  -2  -5   2 4264.57  296.67
   2  -5  -2 3977.50  298.17
   2   5  -2 4211.48  297.07
  -2   5   2 4088.39  298.17
   1  -5  -2 2463.55  186.38
  -1  -5   2 2955.20  186.28
   1   5  -2 2434.06  185.88
  -1   5   2 2428.06  186.28
   0  -5  -2   14.40    3.80
   0  -5   2   13.90    4.20
   0   5   2    8.90    3.40
   0   5  -2    8.80    3.90
   1  -5   2   -0.30    2.80
  -1  -5  -2    1.40    2.50
   1   5   2   -2.30    2.20
  -1   5  -2   -2.70    3.00
  -2  -5  -2   38.50    6.00
   2  -5   2   38.00    7.60
   2   5   2   50.39    6.50
  -2   5  -2   17.80    6.00
   3  -5   2  140.19   14.90
  -3  -5  -2  130.79   12.20
  -3   5  -2  137.19   15.10
   3   5   2  132.79   12.20
  -4  -5  -2 1031.90   80.99
   4  -5   2 1173.78   84.89
  -4   5  -2 1149.78   85.29
   4   5   2 1112.99   80.99
  -5   5  -2    1.80    6.10
   5   5   2    4.30    2.40
   6  -5   2    4.00    5.80
   6   5   2    2.50    1.60
   6   5   2    0.20    1.40
  -6   5  -2   -3.30    5.60
   7  -5   2   13.00    8.10
  -7   5  -2   16.50    8.70
   8  -5   2  333.87   33.80
  -8   5  -2  392.06   36.40
   9  -5   2   68.59   14.40
  -9   5  -2   50.99   14.80
  10  -5   2  166.48   23.30
 -10   5  -2  233.98   28.10
  11  -5   2  -18.30   13.20
 -11   5  -2   10.60   16.20
  12  -5   2   16.10   17.30
 -12   5  -2    6.00   19.30
  13  -5   2   -0.20   20.00
  13  -6  -2    2.10   20.70
 -13   6   2   46.20   27.90
  12  -6  -2   -7.80   16.40
 -12   6   2  -39.00   20.90
  11  -6  -2   15.10   14.50
 -11   6   2   14.30   16.00
  10  -6  -2   -3.00   11.00
 -10   6   2   11.40   12.30
   9  -6  -2   81.69   16.70
  -9   6   2   79.79   16.30
   8  -6  -2   10.90    8.60
  -8   6   2   10.20    9.50
   7  -6  -2  247.38   25.20
  -7   6   2  227.48   25.00
   6  -6  -2    2.00    5.60
  -6   6   2   -4.30    5.80
  -5  -6   2  248.88   19.60
  -5   6   2  292.57   25.60
   4  -6  -2  575.54   43.00
  -4  -6   2  492.55   38.50
   4   6  -2  522.15   39.00
  -4   6   2  469.65   41.80
   3  -6  -2  147.69   16.00
  -3  -6   2  147.59   13.40
  -3   6   2  150.88   15.90
   3   6  -2  149.99   14.00
  -2  -6   2  913.41   69.99
   2  -6  -2  978.10   72.09
   2   6  -2  959.90   70.79
  -2   6   2  916.71   71.79
  -1  -6   2   34.30    6.20
   1  -6  -2   28.50    7.00
   1   6  -2   22.20    5.50
  -1   6   2   19.20    5.40
   0  -6   2  143.49   13.50
   0  -6  -2  155.18   13.70
   0   6   2  111.49   12.60
   0   6  -2   94.89   12.60
   1  -6   2   71.09   12.20
  -1  -6  -2   84.09    9.30
   1   6   2   71.29    9.90
  -1   6  -2   78.29   11.10
  -2  -6  -2 1406.06  110.29
   2  -6   2 1659.43  112.89
  -2   6  -2 1479.35  112.59
   2   6   2 1496.15  110.49
   3  -6   2  307.17   28.90
  -3  -6  -2  298.47   26.30
  -3   6  -2  374.56   30.20
   3   6   2  346.67   26.80
   4  -6   2  216.78   21.60
  -4  -6  -2  212.08   18.10
   4   6   2  224.08   18.10
  -4   6  -2  191.68   21.70
  -5  -6  -2  303.57   24.50
  -5   6  -2  295.07   29.40
   5   6   2  326.37   24.50
   6  -6   2   91.19   15.40
  -6   6  -2   66.79   13.80
   6   6   2   84.89    7.30
   6   6   2   74.99    7.40
   7  -6   2  143.49   20.50
  -7   6  -2  190.98   22.30
   8  -6   2    1.30    8.80
  -8   6  -2    3.00    9.90
   9  -6   2    3.50   10.20
  -9   6  -2   16.80   12.90
  10  -6   2  -16.60   12.10
 -10   6  -2   -2.50   14.10
  11  -6   2   26.40   16.70
 -11   6  -2   43.60   18.80
  12  -6   2   34.20   19.60
 -12   6  -2   35.60   26.50
  12  -7  -2  -17.20   18.50
 -12   7   2   -8.30   20.70
  11  -7  -2   52.79   17.10
 -11   7   2   33.60   18.20
  10  -7  -2  -14.20   11.40
 -10   7   2   18.80   15.00
   9  -7  -2   17.20   17.90
  -9   7   2   -1.10   11.20
   8  -7  -2    8.40   10.20
  -8   7   2    0.50    9.40
   7  -7  -2   23.00    8.90
  -7   7   2    8.40    8.40
  -6   7   2   -5.80    6.20
  -5  -7   2    3.80    2.50
   5  -7  -2   -5.80    5.20
  -5   7   2    0.30    5.80
   5   7  -2    8.10    2.90
  -4  -7   2  597.84   48.80
   4  -7  -2  580.64   52.19
  -4   7   2  689.43   53.09
   4   7  -2  731.33   49.90
   3  -7  -2 1376.96   96.79
  -3  -7   2 1179.88   93.29
   3   7  -2 1331.57   94.29
  -3   7   2 1196.08   95.79
  -2  -7   2  189.98   18.30
  -2   7   2  244.08   20.90
   2   7  -2  196.48   18.90
  -1  -7   2    1.60    3.50
   1  -7  -2   -0.30    3.60
   1   7  -2    2.50    4.30
  -1   7   2   -0.40    3.90
   0  -7   2  822.72   58.89
   0  -7  -2  772.32   58.59
   0   7   2  783.42   58.59
   0   7  -2  638.74   58.09
  -1  -7  -2   56.39    8.80
   1  -7   2   45.20    8.70
   1   7   2   38.40    7.30
  -1   7  -2   63.89   10.10
  -2  -7  -2 1482.45  113.09
   2  -7   2 1553.94  117.79
  -2   7  -2 1550.74  115.49
   2   7   2 1557.54  113.29
   3  -7   2  182.68   18.70
  -3  -7  -2  146.99   15.60
   3   7   2  176.78   15.90
  -3   7  -2  167.38   18.70
  -4  -7  -2   79.49    9.50
   4  -7   2   55.29   12.00
   4   7   2   94.99    9.70
  -4   7  -2   78.69   13.80
   5  -7   2   -6.30    5.80
  -5  -7  -2    0.20    3.00
  -5   7  -2    0.20    6.80
   5   7   2    3.60    2.80
   6  -7   2   10.10    7.70
   6   7   2   18.50    3.80
  -6   7  -2    4.20    8.10
   7  -7   2   55.09   12.80
  -7   7  -2   29.40   11.70
   8  -7   2    8.80   10.40
  -8   7  -2   12.50   10.40
  -9   7  -2   30.00   14.30
  10  -7   2    6.00   14.40
 -10   7  -2  -16.50   15.40
  11  -7   2   53.39   17.90
 -11   7  -2   33.00   21.40
  12  -7   2   31.80   31.00
 -12   7  -2    9.50   23.80
  12  -8  -2   16.00   20.60
 -12   8   2   -6.90   23.40
  11  -8  -2   20.10   17.30
 -11   8   2    9.20   18.60
  10  -8  -2   -8.80   12.60
 -10   8   2   -5.80   15.60
   9  -8  -2   12.80   12.30
  -9   8   2   62.09   15.80
   8  -8  -2   -4.60    9.70
  -8   8   2  -10.70    9.60
  -7   8   2  391.56   37.90
   6  -8  -2  127.59   18.70
  -6  -8   2  122.99   10.90
  -6   8   2  124.09   18.90
  -5  -8   2    7.00    3.80
   5  -8  -2   19.30    8.20
  -5   8   2   13.60    7.10
  -4  -8   2  223.58   20.10
   4  -8  -2  210.68   23.50
   4   8  -2  243.38   21.00
  -4   8   2  257.37   24.50
  -3  -8   2  501.15   40.90
  -3   8   2  506.85   43.70
   3   8  -2  549.25   42.10
  -2  -8   2  886.01   68.99
   2  -8  -2  830.02   70.39
  -2   8   2  932.31   70.99
   2   8  -2  979.40   70.09
  -1  -8   2   21.30    5.70
   1  -8  -2   12.10    5.40
  -1   8   2   16.80    6.00
   1   8  -2    7.50    5.00
   0  -8  -2  314.77   26.10
   0  -8   2  309.77   26.00
   0   8   2  248.88   25.20
   0   8  -2  265.97   25.90
   1  -8   2    1.10    4.70
  -1  -8  -2    3.10    4.00
  -1   8  -2    1.70    5.60
   1   8   2   -2.20    4.10
   2  -8   2 1389.26   93.79
  -2  -8  -2 1077.79   90.49
  -2   8  -2 1205.88   93.29
   2   8   2 1212.08   91.09
   3  -8   2  539.45   50.99
  -3  -8  -2  554.24   45.70
  -3   8  -2  583.64   49.00
   3   8   2  631.94   46.10
  -4  -8  -2  112.49   12.70
   4  -8   2  120.49   17.20
   4   8   2  128.39   12.80
  -4   8  -2  102.29   16.80
  -5  -8  -2   87.79   10.80
   5  -8   2  114.59   16.90
  -5   8  -2  138.19   18.60
   5   8   2   96.89   10.70
   6  -8   2  164.18   22.20
  -6  -8  -2  149.19   13.80
   6   8   2  145.29   13.80
  -6   8  -2  178.98   23.30
  -7   8  -2  244.78   28.40
   8  -8   2   55.29   15.50
  -8   8  -2   60.09   16.20
   9  -8   2   84.79   18.60
  -9   8  -2   86.89   19.90
  10  -8   2   -0.90   14.50
 -10   8  -2   -4.80   16.40
  11  -8   2   32.60   18.50
 -11   8  -2   16.90   20.70
  11  -9  -2   48.50   20.40
 -11   9   2   60.49   22.30
 -10   9   2   35.20   18.10
   9  -9  -2   21.40   14.20
  -9   9   2   13.20   13.60
  -8   9   2    8.30   10.90
   7  -9  -2  131.79   21.00
  -7   9   2  121.89   20.90
  -6  -9   2  845.02   63.49
   6  -9  -2  853.81   70.49
   6   9  -2  841.32   63.69
  -6   9   2  928.51   71.59
  -5  -9   2   20.30    5.30
   5  -9  -2   28.70   10.10
  -5   9   2   27.80   10.10
   5   9  -2   16.70    5.50
  -4  -9   2   81.59   11.10
   4   9  -2   84.49   12.80
  -4   9   2   84.89   15.40
  -3  -9   2   10.40    4.70
   3  -9  -2   13.20    7.60
   3   9  -2   14.60    6.30
  -3   9   2    8.30    5.70
   2  -9  -2  754.52   61.09
  -2  -9   2  773.92   59.49
  -2   9   2  799.52   61.39
   2   9  -2  711.93   59.59
  -1  -9   2   -2.80    4.30
   1  -9  -2   -2.60    4.90
  -1   9   2   -0.20    4.90
   1   9  -2    2.30    4.70
   0  -9  -2  316.47   27.90
   0  -9   2  294.87   27.50
   0   9   2  276.67   27.10
   0   9  -2  308.67   28.20
   1  -9   2  357.26   31.70
  -1  -9  -2  396.96   31.50
  -1   9  -2  353.86   32.30
   1   9   2  301.97   30.10
  -2  -9  -2  118.99   14.10
   2  -9   2  142.99   16.10
  -2   9  -2  131.29   17.50
   2   9   2   77.49   12.60
   3  -9   2  399.26   37.40
  -3  -9  -2  444.76   35.50
  -3   9  -2  384.16   37.80
   3   9   2  434.66   35.00
   4  -9   2  385.56   41.10
  -4  -9  -2  429.96   37.40
   4   9   2  443.96   35.40
  -4   9  -2  447.46   40.20
   5  -9   2  250.57   26.30
  -5  -9  -2  237.78   21.00
  -5   9  -2  247.18   27.20
   5   9   2  205.28   20.40
  -6  -9  -2    5.70    4.10
   6  -9   2   -8.90    8.40
   6   9   2    1.10    4.20
  -6   9  -2   22.80    9.90
   7  -9   2   39.90   13.30
   7   9   2   25.80    4.00
  -7   9  -2   37.10   13.50
   7   9   2   35.00    4.50
  -8   9  -2   37.80   14.90
   9  -9   2   33.60   17.30
  -9   9  -2   72.59   20.90
  10  -9   2   25.60   25.80
 -10   9  -2   32.00   18.70
  11  -9   2    0.10   20.40
 -11   9  -2    9.70   23.00
  11 -10  -2   26.80   23.70
 -11  10   2   26.90   22.90
  10 -10  -2   64.59   20.90
 -10  10   2   86.79   24.00
   9 -10  -2   27.30   17.20
  -9  10   2    1.00   15.00
   8 -10  -2    6.50   12.30
  -8  10   2   14.00   12.10
   7 -10  -2  299.57   34.80
  -7  10   2  360.66   36.00
  -6 -10   2   38.60    6.90
   6 -10  -2   33.90   11.70
  -6  10   2   60.89   15.20
   6  10  -2   37.60    7.60
  -5 -10   2    4.90    4.90
  -5  10   2    5.70    8.00
   5  10  -2    1.20    5.30
   4 -10  -2   44.70   11.80
  -4 -10   2   60.39   10.40
   4  10  -2   78.59   11.90
  -4  10   2   85.19   15.00
  -3 -10   2   37.20    9.00
   3 -10  -2   49.60   11.00
  -3  10   2   54.39   12.50
   3  10  -2   58.29   10.40
  -2 -10   2  285.17   27.70
   2 -10  -2  292.67   29.60
  -2  10   2  346.27   30.50
   2  10  -2  325.27   29.00
   1 -10  -2    5.80    5.20
  -1 -10   2   -2.00    4.90
   1  10  -2    6.40    6.10
  -1  10   2   -1.50    5.40
   0 -10  -2  239.88   23.60
   0 -10   2  236.18   23.20
   0  10   2  198.88   22.20
   0  10  -2  221.28   23.30
  -1 -10  -2   10.80    6.40
   1 -10   2   15.40    7.20
   1  10   2    1.60    5.30
  -1  10  -2    7.00    7.00
  -2 -10  -2   12.20    6.30
   2 -10   2   19.10    7.90
   2  10   2   10.00    5.60
  -2  10  -2   19.40    7.40
   3 -10   2  306.77   31.40
   3  10   2  380.46   29.80
  -3  10  -2  277.07   31.70
   4 -10   2   53.19   12.30
  -4 -10  -2   42.60    8.80
   4  10   2   45.30    8.80
  -4  10  -2   42.50   11.80
  -5 -10  -2   21.70    6.70
   5 -10   2   13.10   12.10
  -5  10  -2   17.80   10.70
   5  10   2   15.40    5.90
   6 -10   2   -1.70   10.00
  -6 -10  -2    2.90    5.00
  -6  10  -2    2.30   10.00
   6  10   2   -0.10    5.10
  -7 -10  -2   30.30    5.60
   7 -10   2   48.50   14.60
  -7  10  -2   27.80   13.10
   7  10   2   28.20    5.80
   8 -10   2   50.09   16.10
  -8  10  -2   19.00   14.20
   9 -10   2  170.98   27.80
  -9  10  -2  176.88   30.40
  10 -10   2   -3.70   19.30
 -10  10  -2   21.00   21.70
  11 -10   2   -1.10   23.40
 -11  10  -2  112.29   38.10
  10 -11  -2  105.09   26.00
 -10  11   2    6.20   20.60
  -9  11   2   -6.30   16.10
   8 -11  -2   14.50   14.80
  -8  11   2   22.80   15.50
   7 -11  -2   45.70   16.70
  -7 -11   2   49.00    6.80
  -7  11   2   46.50   15.10
  -6 -11   2   82.49   10.80
   6  11  -2   82.29   12.00
  -6  11   2   67.69   16.40
  -5 -11   2  328.67   27.60
   5 -11  -2  345.47   33.30
  -5  11   2  254.87   31.40
   5  11  -2  279.97   27.50
   4 -11  -2   37.90   11.70
  -4 -11   2   22.40    7.40
  -4  11   2   17.30    9.50
   4  11  -2   27.90    9.30
  -3 -11   2    1.90    6.00
   3 -11  -2    4.70    7.90
   3  11  -2   -0.10    6.20
  -3  11   2    1.10    7.40
  -2 -11   2  482.05   42.70
   2 -11  -2  482.15   43.30
  -2  11   2  541.25   44.20
   2  11  -2  444.56   41.50
   1 -11  -2  100.89   16.10
  -1 -11   2  122.99   17.00
   1  11  -2  115.99   17.10
  -1  11   2  112.39   16.80
   0 -11  -2  184.98   21.60
   0 -11   2  181.98   21.20
   0  11  -2  181.88   21.70
   0  11   2  196.78   21.30
   1 -11   2  371.96   34.80
  -1 -11  -2  361.86   33.80
   1  11   2  345.97   33.10
  -1  11  -2  404.06   35.90
   2 -11   2  626.74   54.99
  -2  11  -2  703.33   56.49
   2  11   2  627.54   53.09
   3 -11   2  106.69   17.30
  -3 -11  -2   97.19   14.60
   3  11   2   95.29   14.40
  -3  11  -2  101.59   18.20
  -4 -11  -2    0.80    6.10
   4 -11   2    9.70    8.30
   4  11   2    1.30    5.90
  -4  11  -2    5.20    9.50
   5 -11   2   61.39   15.10
  -5 -11  -2   54.69   10.10
   5  11   2   45.10   10.10
  -5  11  -2   48.80   15.10
  -6 -11  -2  142.09   16.20
   6 -11   2  144.89   25.90
  -6  11  -2  149.59   24.50
   6  11   2  153.68   16.80
   7 -11   2   -6.00   12.80
  -7 -11  -2    1.10    5.20
   7  11   2    6.10    5.30
  -7  11  -2   -5.00   13.20
   8 -11   2   88.39   21.80
  -8  11  -2   72.79   20.10
  -9  11  -2   82.49   23.30
  10 -11   2   83.29   25.30
 -10  11  -2   37.10   25.00
 -10  12   2  -34.30   21.20
   9 -12  -2  -14.50   18.10
  -9  12   2   -2.40   18.60
   8 -12  -2   18.90   16.50
  -8  12   2   21.10   15.40
   7 -12  -2   44.10   18.80
  -7 -12   2   36.90    7.10
  -7  12   2   32.10   15.00
   7  12  -2   38.20    7.70
  -6 -12   2    1.60    6.20
   6 -12  -2    2.40   11.70
  -6  12   2    6.30   12.10
   6  12  -2   -7.00    6.60
  -5 -12   2   44.80   10.00
   5 -12  -2   61.69   15.50
  -5  12   2   59.59   14.30
   5  12  -2   47.80   11.20
  -4 -12   2    2.40    6.70
   4 -12  -2   -3.70    9.50
  -4  12   2   12.00   11.30
   4  12  -2   -8.00    6.60
  -3 -12   2  301.27   27.90
   3 -12  -2  225.08   29.00
  -3  12   2  278.67   30.20
   3  12  -2  282.27   27.90
  -2 -12   2   39.00   10.60
   2 -12  -2   35.40   11.50
  -2  12   2   47.40   12.00
   2  12  -2   35.30   10.30
  -1 -12   2  -18.70   12.80
   1 -12  -2   -1.80    7.10
   1  12  -2   10.50    8.30
  -1  12   2   -5.20    6.50
   0 -12  -2  196.68   23.80
   0 -12   2  204.48   23.90
   0  12   2  223.98   24.30
   0  12  -2  214.78   23.90
   1 -12   2   15.20    9.60
   1  12   2    8.30    7.40
  -1  12  -2   23.40   10.80
   2 -12   2    2.20    8.10
  -2 -12  -2    0.20    7.40
   2  12   2   12.70    7.80
  -2  12  -2    2.80    9.00
  -3 -12  -2  133.29   19.00
   3 -12   2  104.89   20.00
   3  12   2  161.78   20.30
  -3  12  -2  179.08   24.30
   4 -12   2   19.40   12.30
  -4 -12  -2   23.30    8.40
   4  12   2   24.20    8.90
  -4  12  -2   25.80   11.90
  -5 -12  -2   47.00   10.80
   5 -12   2   62.69   16.10
   5  12   2   63.39   11.70
  -5  12  -2   54.29   16.20
  -6 -12  -2   -2.60    6.50
   6 -12   2    0.40   13.00
  -6  12  -2  -16.80   11.10
   6  12   2    0.00    6.60
  -7 -12  -2   -8.70    6.10
   7  12   2   -1.30    7.80
  -7  12  -2    4.10   14.40
   8 -12   2   12.50   18.30
  -8  12  -2   11.60   18.10
   9 -12   2  -35.70   19.10
  -9  12  -2    3.80   20.40
 -10  12  -2   43.30   24.40
  10 -13  -2   27.80   24.90
 -10  13   2   29.80   26.30
   9 -13  -2   30.40   22.60
  -9  13   2   25.10   21.80
   8 -13  -2   35.50   20.90
  -8  13   2   34.80   20.00
   7 -13  -2   70.29   19.80
  -7 -13   2   51.79    9.60
   7  13  -2   43.00    9.40
  -7  13   2   24.50   16.90
  -6 -13   2  735.73   57.89
   6 -13  -2  822.32   66.89
   6  13  -2  699.33   58.39
  -6  13   2  654.73   64.89
   5 -13  -2  183.78   27.00
  -5  13   2  221.58   30.40
   5  13  -2  195.98   23.40
  -4 -13   2    0.00    7.30
   4 -13  -2   24.80   11.50
   4  13  -2    8.70    8.80
  -4  13   2    9.30   10.80
  -3 -13   2   -3.70    7.50
   3 -13  -2   -9.70    8.60
  -3  13   2   -6.30    9.50
   3  13  -2    8.80    9.10
  -2 -13   2   19.70    9.20
   2 -13  -2    5.80    9.80
  -2  13   2   -8.70    8.70
   2  13  -2    2.10    8.60
  -1 -13   2   34.30   11.50
   1 -13  -2   38.60   12.30
  -1  13   2   26.90   11.70
   1  13  -2   42.00   11.60
   0 -13   2  132.89   23.30
   0 -13  -2   89.89   17.50
   0  13   2  106.49   18.00
   0  13  -2   98.79   18.70
  -1 -13  -2   21.60   10.60
   1 -13   2   59.59   14.20
  -1  13  -2   49.90   12.70
   1  13   2   38.70   11.20
  -2 -13  -2   82.59   15.60
   2 -13   2   99.49   18.20
  -2  13  -2   92.09   18.20
   2  13   2   67.29   14.60
  -3 -13  -2  719.73   56.89
   3 -13   2  627.64   58.59
  -3  13  -2  666.13   59.89
   3  13   2  660.23   56.29
   4 -13   2   20.90   13.30
  -4  13  -2   -0.10   12.20
   4  13   2   21.50    9.30
   5 -13   2   -9.10   12.50
   5  13   2   -2.10    7.90
  -5  13  -2   12.40   12.60
  -6 -13  -2   85.79   17.30
   6 -13   2   45.30   16.60
  -6  13  -2   76.89   20.60
   6  13   2   64.39   18.30
  -7 -13  -2   -2.20    7.40
   7 -13   2   -6.80   16.70
  -7  13  -2  -13.00   16.40
   7  13   2   -7.70    7.80
  -8  13  -2   20.00   19.60
   8  13   2   16.40    5.20
   9 -13   2   14.90   24.40
  -9  13  -2   37.20   24.10
   9 -14  -2    3.20   23.80
   8 -14  -2   -1.10   19.80
  -8 -14   2    8.30    4.60
  -8  14   2    1.90   20.10
   7 -14  -2   55.29   22.70
  -7 -14   2   57.49   11.20
  -7  14   2   30.20   19.20
   7  14  -2   44.60   11.20
   6 -14  -2   38.20   17.90
  -6 -14   2   29.90   10.20
   6  14  -2   43.70   11.90
  -6  14   2    6.90   14.90
   5 -14  -2   31.20   16.00
  -5  14   2   17.70   14.90
   5  14  -2   50.49   15.40
   4 -14  -2   92.19   18.90
   4  14  -2  100.19   17.90
  -4  14   2   96.49   19.90
  -3 -14   2  201.08   23.80
   3 -14  -2  157.58   25.80
   3  14  -2  204.38   26.60
  -3  14   2  218.58   28.90
   2 -14  -2  150.18   24.50
  -2 -14   2  174.68   23.30
   2  14  -2  190.48   25.10
  -2  14   2  127.39   25.90
   1 -14  -2   94.39   19.00
  -1 -14   2  152.78   21.00
  -1  14   2   80.99   18.20
   1  14  -2   57.39   16.20
   0 -14   2  353.36   36.10
   0 -14  -2  314.17   35.30
   0  14  -2  352.56   36.90
   0  14   2  358.96   36.30
   1 -14   2  448.96   44.00
  -1 -14  -2  483.05   44.00
   1  14   2  434.36   43.10
  -1  14  -2  487.45   45.50
  -2 -14  -2  153.28   22.70
   2 -14   2  169.08   24.60
   2  14   2  138.79   21.80
  -2  14  -2  160.28   36.80
  -3 -14  -2  305.47   28.60
   3 -14   2  255.37   32.90
  -3  14  -2  188.38   30.80
   3  14   2  227.38   27.40
   4 -14   2   12.80   12.60
  -4  14  -2   35.90   13.50
   4  14   2    5.80   10.50
   5 -14   2   18.00   14.00
  -5  14  -2   17.70   14.80
   5  14   2    6.80   10.40
  -6 -14  -2   22.10   10.00
   6 -14   2  -22.80   15.90
   6  14   2    4.00    9.00
  -6  14  -2   10.00   16.10
   7 -14   2   -5.20   17.90
  -7 -14  -2    6.00    8.90
  -7  14  -2   -8.50   18.50
   7  14   2    4.40    9.40
   8 -14   2  -10.30   21.00
  -8  14  -2    3.90   20.80
   9 -14   2  -17.10   25.00
  -9  14  -2   24.10   26.50
   9 -15  -2    2.50   29.20
  -9  15   2  -19.10   25.70
   8 -15  -2   62.89   26.70
  -8  15   2   76.89   26.80
   7 -15  -2   11.80   20.90
  -7  15   2    5.00   20.50
  -6 -15   2   -0.40   10.60
   6 -15  -2   24.00   16.80
   6  15  -2   -1.40   10.50
  -6  15   2    4.40   16.90
   5 -15  -2   25.20   16.60
  -5  15   2   17.20   16.40
   5  15  -2   25.10   12.60
   4 -15  -2   10.80   13.30
  -4  15   2   -0.50   12.60
   3 -15  -2   17.90   12.60
  -3 -15   2   -6.20    9.60
  -3  15   2   -8.80   12.80
   3  15  -2   -1.30   11.20
   2 -15  -2   70.79   18.10
  -2 -15   2   35.10   13.20
   2  15  -2   42.90   15.30
  -2  15   2   65.29   17.30
  -1 -15   2    4.10   10.90
   1 -15  -2   -8.30   11.60
   1  15  -2   27.20   12.00
  -1  15   2  -14.90   10.90
   0 -15   2   14.80   12.10
   0 -15  -2   -0.20   11.80
   0  15  -2   -9.20   11.10
   0  15   2   26.80   12.00
  -1 -15  -2   11.60   11.30
   1 -15   2   24.50   12.70
   1  15   2   26.00   11.80
  -1  15  -2   18.40   12.90
  -2 -15  -2   32.80   13.10
   2 -15   2    9.40   12.40
  -2  15  -2   32.80   16.10
   2  15   2   19.40   12.40
  -3 -15  -2   14.60   13.30
   3 -15   2   23.60   15.50
  -3  15  -2   32.50   16.60
   3  15   2   10.80   11.70
   4 -15   2   48.10   18.50
  -4  15  -2   27.50   17.10
   4  15   2   24.50   12.60
   5 -15   2  129.09   25.40
  -5  15  -2  119.89   25.20
   5  15   2   79.69   16.80
   6 -15   2   53.59   21.00
  -6 -15  -2   41.70   13.30
  -6  15  -2   48.80   19.90
   7 -15   2  -28.40   20.80
  -7  15  -2   -7.10   19.70
   8 -15   2   -5.40   23.40
  -8  15  -2  -16.80   22.80
   9 -15   2  -54.69   34.80
   8 -16  -2  -23.40   26.40
  -8  16   2   17.10   27.60
   7 -16  -2  105.99   28.20
  -7  16   2   30.90   24.40
   6 -16  -2   45.80   22.10
  -6  16   2   87.39   22.40
   5 -16  -2   14.70   17.90
  -5 -16   2    1.40   11.90
   5  16  -2    6.30   13.40
  -5  16   2   35.60   17.10
   4 -16  -2  146.69   36.50
   4  16  -2  106.59   20.00
  -4  16   2  105.59   24.10
   3 -16  -2  109.89   23.50
   3  16  -2  155.88   27.40
  -3  16   2   84.69   21.20
  -2 -16   2   65.29   18.90
   2 -16  -2   48.10   18.20
   2  16  -2   57.09   17.40
  -2  16   2   55.09   18.40
  -1 -16   2    3.00   12.20
   1 -16  -2   -8.40   13.10
   1  16  -2    8.50   12.90
  -1  16   2   -5.30   12.20
   0 -16   2   54.09   16.50
   0 -16  -2   35.60   15.10
   0  16   2   26.80   14.70
   0  16  -2   24.60   14.80
  -1 -16  -2   32.70   14.60
   1 -16   2   68.59   19.30
  -1  16  -2   16.20   16.10
   1  16   2   37.10   15.60
   2 -16   2   58.69   18.80
  -2  16  -2   40.40   18.40
   2  16   2   72.49   18.40
   3 -16   2  -12.20   14.50
  -3 -16  -2   15.00   14.40
  -3  16  -2   10.50   16.00
   3  16   2   11.20   13.00
   4 -16   2   66.09   21.30
  -4  16  -2   76.59   21.90
   4  16   2   62.39   17.30
  -5 -16  -2    0.70   14.10
   5 -16   2  -29.10   16.60
  -5  16  -2   20.60   19.80
   6 -16   2   40.60   23.10
  -6  16  -2   20.60   21.40
   7 -16   2   39.50   25.40
  -7  16  -2  -24.00   23.50
   8 -16   2    2.10   29.30
  -8  16  -2   23.50   29.10
   8 -17  -2   20.40   31.90
  -8  17   2    1.30   30.50
   7 -17  -2   32.70   27.60
  -7  17   2  -64.19   23.90
   6 -17  -2    8.50   24.60
  -6  17   2   -8.20   23.50
   5 -17  -2  -10.40   19.10
  -5  17   2   39.90   21.30
   4 -17  -2  -24.30   17.20
  -4 -17   2   13.60   14.80
  -4  17   2   36.60   19.10
   3 -17  -2   -7.80   15.20
  -3 -17   2   12.90   14.70
   3  17  -2    8.40   15.90
  -3  17   2   14.30   17.90
  -2 -17   2   96.99   24.40
   2 -17  -2  158.78   29.20
  -2  17   2  156.18   29.20
   2  17  -2  189.58   29.10
   1 -17  -2  214.68   32.60
   1  17  -2  291.77   37.70
  -1  17   2  273.67   36.20
   0 -17   2   19.50   15.40
   0 -17  -2    5.20   14.60
   0  17   2   31.40   16.10
   0  17  -2   24.70   16.20
   1 -17   2   -4.40   14.10
   1  17   2   32.60   14.90
  -1  17  -2    3.30   16.10
  -2 -17  -2  145.29   27.20
   2 -17   2  248.08   33.40
  -2  17  -2  202.58   32.60
   2  17   2  236.58   31.00
   3 -17   2  -21.40   17.10
  -3 -17  -2   19.30   16.00
   3  17   2   22.50   14.90
  -3  17  -2   20.80   17.50
   4 -17   2   30.70   20.50
  -4  17  -2   19.70   19.00
   5 -17   2    9.10   22.30
  -5  17  -2    7.90   22.40
   6 -17   2   37.30   29.70
  -6  17  -2    7.20   23.70
   7 -17   2  -18.40   24.60
  -7  17  -2   28.50   28.90
   7 -18  -2  -37.90   32.80
  -7  18   2    7.00   30.60
   6 -18  -2   74.09   29.00
  -6  18   2   -5.60   26.00
   5 -18  -2   59.09   26.00
  -5  18   2  -16.30   23.30
   4 -18  -2   51.79   23.70
  -4  18   2   38.10   22.30
   3 -18  -2   14.70   19.40
  -3  18   2  -10.10   18.80
   2 -18  -2   51.89   21.80
  -2 -18   2   43.80   19.10
  -2  18   2   37.10   19.40
   2  18  -2   29.30   19.60
   1 -18  -2   -0.80   16.70
  -1 -18   2   17.30   17.10
  -1  18   2   14.80   19.20
   1  18  -2   15.00   19.00
  -1 -18  -2   20.50   18.30
   1 -18   2   54.99   19.90
   1  18   2   31.70   17.50
  -1  18  -2   45.70   23.80
  -2 -18  -2   32.90   18.50
   2 -18   2   69.09   21.90
  -2  18  -2   57.99   24.40
   2  18   2   12.50   18.10
   3 -18   2   68.89   23.80
  -3  18  -2   71.09   25.00
   4 -18   2   61.29   25.50
  -4  18  -2   68.09   24.10
   5 -18   2   -6.30   23.60
  -5  18  -2  -25.90   23.10
   6 -18   2   81.59   30.50
  -6  18  -2   13.20   29.40
   7 -18   2   54.89   36.20
  -7  18  -2  133.09   35.80
   7 -19  -2   -3.40   43.30
   6 -19  -2   66.49   32.50
  -6  19   2    9.70   32.00
   5 -19  -2   34.00   28.40
  -5  19   2   17.90   25.40
   4 -19  -2    3.70   23.00
  -4  19   2    1.30   24.60
   3 -19  -2   10.20   23.20
  -3  19   2   -0.60   23.00
  -2  19   2   54.99   26.20
   1 -19  -2   15.70   20.00
  -1 -19   2   10.40   18.60
   1  19  -2   -8.70   19.60
  -1  19   2  -24.20   20.50
   0 -19   2   13.50   19.80
   0 -19  -2  -26.60   18.60
   0  19   2   -0.30   19.50
   0  19  -2    8.70   21.00
  -1 -19  -2   -4.70   19.60
   1 -19   2   -9.90   19.90
   1  19   2   11.30   21.50
  -1  19  -2  -24.80   21.10
  -2  19  -2   29.30   29.60
   3 -19   2   31.40   21.90
  -3  19  -2   -8.80   22.90
   4 -19   2   -2.50   23.80
  -4  19  -2   -3.20   24.30
   5 -19   2   60.89   30.10
  -5  19  -2   44.30   27.90
   6 -19   2   62.99   37.70
  -6  19  -2   -4.10   32.70
   6 -20  -2   34.70   35.10
  -6  20   2  -38.40   34.90
   5 -20  -2   23.50   34.60
  -5  20   2   32.90   32.50
  -4  20   2   51.79   39.60
   3 -20  -2  -55.09   28.30
  -3  20   2   43.10   26.20
   2 -20  -2    8.70   23.10
  -2  20   2  -47.10   23.70
   1 -20  -2   35.00   23.50
  -1  20   2   64.29   25.30
   1 -20   2  -53.49   22.30
  -1  20  -2   19.30   26.10
   2 -20   2  -24.10   23.50
  -2  20  -2   43.10   27.40
   3 -20   2   40.60   29.30
  -3  20  -2   34.10   29.30
   5 -20   2  -37.70   37.20
  -5  20  -2   -8.50   31.80
   6 -20   2   21.50   38.70
  -6  20  -2    3.40   42.80
   5 -21  -2  -49.10   37.30
  -5  21   2  -12.40   39.10
   4 -21  -2  -18.80   33.30
  -4  21   2  -27.40   33.00
   3 -21  -2    1.60   31.00
  -3  21   2   -7.00   31.10
   3 -21   2    6.00   32.30
  -3  21  -2   -7.50   35.30
   4 -21   2   47.90   37.00
  -4  21  -2  -58.29   32.90
   5 -21   2   72.69   39.50
  -5  21  -2  134.69   41.00
 -10   0   3   -2.50    4.60
  10   0  -3    5.20    4.00
  -9   0   3   -2.40    4.60
   9   0  -3    1.40    4.80
   8   0  -3    0.40    3.50
  -8   0   3    6.10    4.50
   7   0  -3   -1.10    3.00
  -7   0   3    1.90    3.40
   6   0  -3   -0.80    2.70
  -6   0   3    8.20    3.00
  -5   0   3    2.30    2.30
   5   0  -3    3.50    2.40
  -4   0   3   -2.30    1.70
   4   0  -3    0.40    2.00
  -3   0   3   -2.30    1.50
   3   0  -3    0.80    1.60
  -2   0   3    1.10    1.40
   2   0  -3    2.10    1.60
  -1   0   3    1.10    1.40
   0   0   3    0.30    1.40
   1   0   3   -2.60    1.30
   1   0   3    0.30    1.60
   2   0   3    1.00    1.80
   3   0   3    3.00    2.40
  -3   0  -3   -3.00    2.00
  -4   0  -3    1.50    2.50
   4   0   3   -5.10    2.70
  -5   0  -3    4.90    3.30
   5   0   3    2.70    3.60
   6   0   3    0.00    3.90
   7   0   3   -0.70    4.10
   8   0   3   -0.40    5.20
   8   0   3   -0.20    4.80
   9   0   3   -1.90    5.50
   9   0   3   -0.20    6.00
  10   0   3    3.90    6.60
  10   0   3    4.20    6.00
  11   0   3   -2.00    6.60
  11   0   3    4.10    6.10
  11  -1  -3    7.90    5.70
 -11   1   3    4.60    7.20
  10  -1  -3    0.20    5.90
 -10   1   3   -3.80    6.90
   9  -1  -3  126.19   14.10
  -9   1   3  114.89   14.70
  -8  -1   3   18.20    4.10
   8  -1  -3   11.00    5.00
  -8   1   3   18.20    6.40
   8   1  -3   18.40    3.50
   7  -1  -3   11.40    4.70
  -7  -1   3   13.00    3.60
   7   1  -3   18.50    3.70
  -7   1   3    9.40    5.00
   6  -1  -3   57.89    9.00
  -6  -1   3   78.89    7.70
  -6   1   3   79.39    9.80
   6   1  -3   83.19    7.80
  -5  -1   3  198.18   16.10
   5   1  -3  199.48   16.30
  -5   1   3  208.58   17.60
  -4  -1   3  222.88   17.90
   4  -1  -3  232.38   19.20
   4   1  -3  218.38   18.00
  -4   1   3  241.28   19.10
  -3  -1   3  726.83   50.99
   3  -1  -3  722.83   51.89
  -3   1   3  621.64   51.39
   3   1  -3  694.83   50.99
  -2  -1   3 1311.77   92.89
  -2   1   3 1236.98   93.29
   2   1  -3 1294.57   92.89
   1  -1  -3   39.20    5.40
  -1  -1   3   51.99    5.00
  -1   1   3   29.50    4.70
   0  -1   3   43.40    5.40
   0  -1  -3   50.79    5.50
   0   1   3   51.49    5.60
  -1  -1  -3    4.60    1.90
   1  -1   3    4.40    2.20
   1   1   3    4.30    2.00
  -1   1  -3    4.10    2.00
   2   1   3  105.29   10.00
  -2   1  -3  107.09   10.60
   3  -1   3  189.48   16.80
   3   1   3  156.58   15.70
   3   1   3  202.38   16.00
  -3   1  -3  198.88   16.90
   4  -1   3  257.47   22.00
   4   1   3  252.87   20.90
   4   1   3  239.58   21.00
  -4   1  -3  255.27   21.90
   5  -1   3  357.36   30.70
   5   1   3  378.46   30.00
  -5   1  -3  392.86   31.20
   5   1   3  356.36   29.60
   6  -1   3   10.30    4.90
  -6   1  -3   17.50    5.20
   6   1   3   14.10    4.10
   6   1   3   15.40    4.80
   7  -1   3   26.60    7.00
   7   1   3   11.20    4.60
   7   1   3   23.50    5.80
  -7   1  -3   20.90    7.40
   8  -1   3  177.38   19.50
   8   1   3  207.38   18.50
  -8   1  -3  184.38   20.60
   8   1   3  212.88   18.20
   9  -1   3    0.40    6.50
   9   1   3   12.90    5.60
   9   1   3   19.90    8.50
  10  -1   3   17.20    7.80
  10  -1   3    8.70    8.40
  10   1   3    5.10    4.70
  10   1   3    6.20    6.00
  11  -1   3   -1.10    7.90
  12  -1   3    5.20   14.10
  12  -2  -3   -1.50    7.90
 -12   2   3  -13.20    9.50
  11  -2  -3    2.80    8.40
 -11   2   3   34.50   10.40
  10  -2  -3  266.97   24.80
 -10   2   3  245.28   25.70
   9  -2  -3    0.50    5.80
  -9   2   3    4.00    7.00
   8  -2  -3  264.17   24.00
  -8   2   3  255.07   24.30
   7  -2  -3    7.80    5.00
  -7   2   3   10.10    5.40
  -6  -2   3  116.59    9.30
   6  -2  -3  100.19   12.40
  -6   2   3  127.99   13.40
   5  -2  -3  603.44   46.60
  -5  -2   3  572.34   43.60
  -5   2   3  634.94   46.50
  -4  -2   3 1329.67   99.09
   4  -2  -3 1412.76  101.59
  -4   2   3 1399.26  101.29
  -3  -2   3  167.58   13.80
  -3  -2   3  167.38   13.70
  -3   2   3  178.08   15.20
  -2  -2   3  986.40   76.79
  -2  -2   3 1048.40   76.99
  -2   2   3 1145.09   78.09
   1  -2  -3    9.10    2.60
  -1  -2   3    7.60    2.40
   1   2  -3    5.70    2.10
  -1   2   3    8.90    2.60
   0  -2   3 1367.46   94.39
   0  -2  -3 1344.67   94.09
   0   2  -3 1300.77   94.29
   0   2   3 1143.49   93.69
   1  -2   3  335.17   27.40
  -1  -2  -3  320.07   26.50
  -1   2  -3  373.66   27.60
  -2  -2  -3  279.37   19.90
   2   2   3  224.18   19.40
  -2   2  -3  220.68   20.50
   3  -2   3    2.40    3.50
   3   2   3    8.80    2.90
  -3   2  -3    3.90    3.40
   4  -2   3  900.21   68.89
   4   2   3  864.51   66.99
  -4   2  -3  950.50   69.19
   4   2   3  911.61   66.99
   5  -2   3  443.66   34.60
   5   2   3  400.96   32.10
   5   2   3  414.76   31.90
  -5   2  -3  377.56   34.00
   6  -2   3  975.20   83.99
  -6   2  -3 1131.49   79.09
   6   2   3 1021.60   75.79
   6   2   3  972.10   75.49
   7  -2   3  202.08   20.00
   7   2   3  194.88   17.10
   7   2   3  188.08   17.00
  -7   2  -3  205.58   21.10
   8  -2   3    1.60    6.20
   8   2   3    4.90    3.70
  -8   2  -3    9.20    7.40
   8   2   3    6.50    3.80
   9  -2   3    2.20    6.90
  -9   2  -3   -9.50    8.20
   9   2   3    3.00    3.40
   9   2   3    7.30    3.80
  10  -2   3  101.29   15.10
  11  -2   3   18.10   10.00
  12  -2   3   25.90   11.60
  13  -3  -3    2.80   10.80
 -13   3   3    6.30   14.30
  12  -3  -3   10.60   11.60
 -12   3   3    4.60   12.40
  11  -3  -3   14.30    9.80
 -11   3   3   36.50   12.50
  10  -3  -3   26.90    9.60
 -10   3   3   18.00   10.10
   9  -3  -3   53.59   10.60
  -9   3   3   49.10   11.10
   8  -3  -3   70.09   12.00
  -8   3   3   67.69   12.00
   7  -3  -3   36.90    8.30
  -7   3   3   33.60    8.40
   6  -3  -3  803.02   61.19
  -6   3   3  773.22   60.79
   5  -3  -3   63.09    9.20
  -5  -3   3   48.30    4.20
  -5  -3   3   48.30    4.10
  -5   3   3   61.59    8.90
   4  -3  -3   18.60    5.00
  -4  -3   3   22.60    3.00
  -4  -3   3   16.50    2.90
  -4   3   3   21.60    5.30
  -3  -3   3  347.47   26.50
  -3  -3   3  342.07   26.30
  -3   3   3  349.17   28.30
   2  -3  -3 1119.79   81.29
  -2  -3   3 1119.19   79.99
  -2   3   3 1064.99   80.99
   2   3  -3 1070.79   79.99
   1  -3  -3 3888.61  252.77
  -1  -3   3 3679.63  252.17
   1   3  -3 3520.95  252.17
  -1   3   3 2966.20  251.87
   0  -3   3  153.48   14.20
   0  -3  -3  170.58   14.10
   0   3   3  146.89   13.80
   0   3  -3  157.38   14.40
   1  -3   3   36.00    6.30
   1   3   3   33.50    5.30
  -1   3  -3   56.79    7.50
   2  -3   3 2744.03  191.28
  -2  -3  -3 2515.55  189.48
  -2   3  -3 2453.25  190.88
   2   3   3 2814.92  189.78
  -3  -3  -3  501.85   38.10
   3   3   3  529.65   38.30
  -3   3  -3  461.15   39.90
  -4   3  -3 1821.32  148.99
   4   3   3 2089.09  146.89
   4   3   3 2161.28  147.19
   5  -3   3   74.89   11.70
   5   3   3   80.19    8.30
   5   3   3   78.89    8.60
  -5   3  -3   64.19   11.40
   6  -3   3   86.79   13.30
   6   3   3   95.79    9.50
   6   3   3   98.89   10.10
  -6   3  -3   95.29   14.00
   7  -3   3   10.40    6.40
   7   3   3    8.20    3.10
   7   3   3    8.80    3.60
   8  -3   3   47.60   10.40
  -8   3  -3   53.59   11.90
   8   3   3   48.80    5.90
   8   3   3   43.90    7.10
   9  -3   3   39.90   10.30
  -9   3  -3   23.40   10.70
  10  -3   3    7.60    9.40
 -10   3  -3    3.40   11.40
  11  -3   3   43.30   13.20
  12  -3   3    8.60   13.40
  13  -3   3  -19.60   15.10
  12  -4  -3   82.89   17.30
 -12   4   3   94.49   19.90
 -11   4   3    4.40   12.90
  10  -4  -3   12.80   10.10
 -10   4   3   11.10   10.40
   9  -4  -3   44.30   11.20
  -9   4   3   44.30   11.20
   8  -4  -3  133.89   17.40
  -8   4   3  140.39   18.70
   7  -4  -3    6.80    6.20
  -7   4   3    0.40    5.70
   6  -4  -3   10.40    5.50
  -6   4   3   -0.20    5.10
   5  -4  -3   44.20    8.50
  -5   4   3   41.70    8.00
  -4  -4   3   70.79    6.70
  -4  -4   3   65.39    6.70
  -4   4   3   87.89   10.10
  -3  -4   3 2555.64  189.38
   3  -4  -3 2709.73  191.78
   3   4  -3 2793.82  189.68
  -3   4   3 2480.55  191.28
   2  -4  -3  527.15   39.70
  -2  -4   3  484.05   38.20
   2   4  -3  517.95   38.40
  -2   4   3  466.35   39.10
  -1  -4   3 5210.28  359.56
   1  -4  -3 5219.28  360.06
   1   4  -3 4802.12  359.36
  -1   4   3 4828.52  359.66
   0  -4  -3  188.28   16.00
   0  -4   3  183.28   16.20
   0   4   3  156.78   15.70
  -1  -4  -3 2186.78  153.98
   1  -4   3 2109.89  154.98
  -1   4  -3 2018.70  154.98
   1   4   3 2168.68  153.98
  -2  -4  -3 1440.46  103.89
   2  -4   3 1402.46  105.59
   2   4   3 1402.16  103.79
  -2   4  -3 1436.16  105.79
  -3  -4  -3 2351.56  175.28
   3  -4   3 2348.17  177.78
   3   4   3 2508.55  175.48
  -3   4  -3 2514.35  178.18
  -4  -4  -3   19.40    4.10
   4   4   3   22.00    4.20
  -4   4  -3   25.60    7.10
   5  -4   3   13.70    5.70
   5   4   3   20.50    4.00
   5   4   3   12.80    3.90
  -5   4  -3   10.90    6.60
   6  -4   3  189.28   19.90
  -6   4  -3  177.68   20.20
   6   4   3  178.58   15.30
   6   4   3  189.78   15.80
   7  -4   3  322.97   31.50
   7   4   3  358.06   26.60
  -7   4  -3  339.67   33.10
   7   4   3  353.16   26.40
   8  -4   3  194.08   23.00
  -8   4  -3  223.78   24.60
   9  -4   3  132.59   19.00
  -9   4  -3  141.49   20.40
  10  -4   3    3.70   10.30
 -10   4  -3   16.60   12.80
  11  -4   3   45.30   22.30
 -11   4  -3    2.60   15.10
  12  -4   3   15.70   14.80
  13  -4   3   -1.60   26.30
  13  -5  -3   46.50   20.30
 -13   5   3   49.20   21.50
  12  -5  -3   48.30   16.50
 -12   5   3   32.50   18.00
  11  -5  -3   23.50   13.40
 -11   5   3   35.90   15.20
  10  -5  -3   -6.00    9.70
 -10   5   3   -1.30   11.40
   9  -5  -3    9.20    9.00
  -9   5   3   10.50    9.40
   8  -5  -3   53.69   11.50
  -8   5   3   72.59   16.40
   7  -5  -3  164.98   18.70
  -7   5   3  131.89   18.80
   6  -5  -3    8.80    6.10
  -6   5   3   12.00    6.00
  -5  -5   3   -0.50    1.40
  -5  -5   3    3.50    1.50
  -5   5   3    1.70    4.00
  -4  -5   3    0.50    2.00
   4  -5  -3    3.20    4.30
  -4   5   3    1.20    3.90
   3  -5  -3   49.30    8.30
  -3  -5   3   25.10    4.90
  -3   5   3   30.10    6.20
   3   5  -3   29.20    5.20
  -2  -5   3 1986.30  136.49
   2  -5  -3 1939.11  137.89
  -2   5   3 1595.64  136.99
   2   5  -3 1969.80  136.79
   1  -5  -3  283.17   25.40
  -1  -5   3  326.97   25.40
   1   5  -3  296.07   25.40
   0  -5  -3   77.69    9.40
   0  -5   3   67.59    9.90
   0   5   3   80.29    9.30
   0   5  -3   88.39   10.10
   1  -5   3 2133.39  156.98
  -1  -5  -3 2308.17  156.08
   1   5   3 2004.00  155.58
  -1   5  -3 2121.79  163.68
   2  -5   3  839.62   66.19
  -2  -5  -3  860.01   64.29
   2   5   3  850.51   64.19
  -2   5  -3  875.91   66.49
  -3  -5  -3   36.50    6.40
   3  -5   3   41.90    9.00
   3   5   3   63.69    7.30
  -3   5  -3   75.69   11.20
  -4  -5  -3  211.98   18.60
   4  -5   3  230.18   22.30
   4   5   3  216.38   18.50
  -4   5  -3  233.88   22.30
  -5   5  -3   -2.60    5.10
   5   5   3    4.50    3.00
   6  -5   3   63.39   11.80
   6   5   3   66.19    7.70
  -6   5  -3   54.19   11.70
   7  -5   3   42.60   10.40
  -7   5  -3   25.30    9.40
   7   5   3   32.80    4.40
   7   5   3   42.30    4.50
   8  -5   3  -16.10   12.30
  -8   5  -3   -6.10    9.40
   9  -5   3   73.29   15.70
  -9   5  -3   77.99   16.80
  10  -5   3  121.89   19.30
 -10   5  -3   72.99   18.90
  11  -5   3   10.10   14.60
 -11   5  -3   15.40   16.60
  12  -5   3   33.20   18.00
 -12   5  -3   -2.20   20.80
  13  -5   3   38.30   36.90
  13  -6  -3    9.70   20.30
 -13   6   3   13.10   25.20
  12  -6  -3   -6.00   16.50
 -12   6   3   -3.70   25.00
  11  -6  -3   84.69   19.20
 -11   6   3  108.99   21.90
  10  -6  -3   29.30   13.10
 -10   6   3   37.50   13.60
   9  -6  -3    6.70   10.20
  -9   6   3   28.40   11.50
   8  -6  -3   46.60   11.90
  -8   6   3   49.60   13.10
   7  -6  -3   11.40    7.70
  -7   6   3    6.50    7.80
   6  -6  -3  152.18   17.30
  -6   6   3  116.89   17.00
  -5  -6   3   54.49    5.90
  -5  -6   3   52.89    5.90
  -5   6   3   50.39   10.00
   4  -6  -3  466.25   35.40
  -4  -6   3  364.56   30.60
  -4   6   3  384.06   34.00
   4   6  -3  402.46   31.20
   3  -6  -3  866.71   71.09
  -3  -6   3  907.81   68.69
  -3   6   3  907.61   70.99
   3   6  -3  996.80   69.49
   2  -6  -3  754.92   55.89
  -2  -6   3  662.23   53.89
   2   6  -3  805.72   54.99
  -2   6   3  616.74   54.79
   1  -6  -3   57.99    9.20
  -1  -6   3   60.79    8.60
  -1   6   3   46.30    8.40
   1   6  -3   29.20    6.70
   0  -6   3  206.88   19.70
   0  -6  -3  244.28   20.00
   0   6  -3  208.48   20.00
   0   6   3  186.58   19.00
   1  -6   3   45.50    8.70
  -1  -6  -3   48.70    7.70
  -1   6  -3   37.60    8.10
   1   6   3   37.90    6.80
  -2  -6  -3  424.06   34.70
   2  -6   3  379.26   36.10
  -2   6  -3  499.55   38.10
   2   6   3  445.36   34.80
  -3  -6  -3  816.82   63.19
   3  -6   3  837.72   65.99
   3   6   3  871.21   63.29
  -3   6  -3  825.62   66.19
  -4  -6  -3  175.88   16.20
   4  -6   3  184.58   19.90
   4   6   3  183.78   16.00
  -4   6  -3  160.28   19.30
  -5  -6  -3    9.20    3.70
   5  -6   3    9.90    6.40
   5   6   3   11.40    3.60
  -5   6  -3    7.10    7.00
  -6   6  -3    6.00    7.00
   6   6   3    6.80    3.40
   6   6   3    1.30    2.90
   7  -6   3  100.49   17.00
  -7   6  -3  112.59   18.60
   7   6   3  110.29    8.70
   8  -6   3  207.88   26.10
  -8   6  -3  185.78   25.80
   9  -6   3   -5.70   10.30
  -9   6  -3   -6.10   12.00
  10  -6   3   92.09   18.80
 -10   6  -3  141.39   21.40
  11  -6   3   34.60   15.90
 -11   6  -3   -6.20   18.30
  12  -6   3    1.40   19.90
 -12   6  -3   13.20   24.20
  12  -7  -3    0.80   19.20
 -12   7   3    3.90   20.80
  11  -7  -3    1.60   15.20
 -11   7   3    6.30   16.90
  10  -7  -3  217.28   27.80
 -10   7   3  205.68   29.00
  -9   7   3   18.80   11.20
   8  -7  -3   96.89   16.70
  -8   7   3  112.99   18.20
   7  -7  -3   -2.50    7.10
  -7   7   3   12.30    8.30
  -6  -7   3  371.26   27.80
  -6  -7   3  394.26   27.90
  -6   7   3  406.86   35.60
  -5  -7   3  558.64   43.10
   5  -7  -3  563.04   48.20
   5   7  -3  598.84   43.60
  -5   7   3  565.34   47.90
  -4  -7   3   24.70    5.20
   4  -7  -3   23.30    8.00
  -4   7   3   45.00    9.40
   4   7  -3   34.10    6.20
   3  -7  -3 1732.83  137.59
  -3  -7   3 1793.42  134.99
  -3   7   3 1854.71  137.79
   3   7  -3 2014.20  136.19
   2  -7  -3 2324.37  184.58
  -2  -7   3 2493.35  183.28
  -2   7   3 2727.13  185.38
   2   7  -3 2539.85  183.98
  -1  -7   3  607.74   46.70
   1  -7  -3  606.84   47.30
  -1   7   3  661.93   47.80
   1   7  -3  484.25   46.20
   0  -7   3  523.45   41.00
   0  -7  -3  525.75   40.80
   0   7   3  491.85   40.40
   0   7  -3  450.35   40.70
  -1  -7  -3  262.77   22.60
   1  -7   3  271.87   23.90
   1   7   3  216.28   22.00
  -1   7  -3  256.27   24.10
  -2  -7  -3    0.00    3.30
   2  -7   3   -0.10    4.90
   2   7   3   -0.60    3.30
  -2   7  -3    2.80    4.60
  -3  -7  -3  531.55   43.10
   3  -7   3  535.25   45.90
  -3   7  -3  539.75   46.80
   3   7   3  578.24   43.30
  -4  -7  -3  124.59   13.60
   4  -7   3  145.79   17.40
   4   7   3  136.59   13.80
  -4   7  -3  149.59   17.90
  -5  -7  -3   -0.60    3.50
   5  -7   3    3.00    6.80
   5   7   3   -0.40    3.40
  -5   7  -3   -3.90    6.70
  -6   7  -3   67.09   14.10
   6   7   3   58.29    7.70
   7  -7   3  213.18   24.90
   7   7   3  202.78   16.60
   7   7   3  226.48   16.60
  -7   7  -3  217.48   27.70
   8  -7   3   14.60   11.20
  -8   7  -3    6.90   11.60
   9  -7   3  -13.20   12.90
  -9   7  -3   -4.90   13.00
  10  -7   3    6.40   14.50
 -10   7  -3   26.80   17.40
  11  -7   3   34.80   18.70
 -11   7  -3   47.80   22.00
  12  -7   3  -12.20   29.50
 -12   7  -3   34.00   37.20
  12  -8  -3    4.40   19.90
 -12   8   3    4.90   24.00
  11  -8  -3   20.60   17.50
 -11   8   3   35.40   19.00
  10  -8  -3  -10.80   13.50
 -10   8   3   -1.80   14.40
   9  -8  -3  -17.40   10.80
  -9   8   3   -3.60   12.30
   8  -8  -3  -11.40    9.80
  -8   8   3    1.70   10.70
  -7   8   3  501.75   45.50
   6  -8  -3  122.59   19.20
  -6  -8   3  118.29   10.80
  -6  -8   3  123.59   10.90
  -6   8   3  129.79   19.10
  -5  -8   3   -4.00    3.30
   5  -8  -3   -4.20    6.20
  -5   8   3   11.30    6.70
   5   8  -3    1.30    3.70
  -4  -8   3   24.80    5.60
   4  -8  -3   25.40    8.80
  -4   8   3   19.20    7.50
   4   8  -3   30.50    6.50
   3  -8  -3  509.55   43.00
  -3  -8   3  463.75   39.00
  -3   8   3  497.95   41.70
   3   8  -3  494.55   40.10
  -2  -8   3  389.96   30.50
   2  -8  -3  349.17   31.80
  -2   8   3  333.47   31.20
   2   8  -3  335.97   30.50
   1  -8  -3  736.73   59.19
  -1  -8   3  782.82   58.59
   1   8  -3  638.14   58.39
  -1   8   3  834.62   59.79
   0  -8  -3   93.69   12.70
   0  -8   3   94.89   13.20
   0   8   3   77.09   11.70
   0   8  -3   65.49   12.10
   1  -8   3 1773.32  132.29
  -1  -8  -3 1759.62  131.19
  -1   8  -3 1996.70  133.79
   1   8   3 1583.84  130.69
   2  -8   3   25.30    8.00
  -2  -8  -3   31.80    7.10
   2   8   3   15.50    5.60
  -2   8  -3   52.59   10.70
  -3  -8  -3   65.39   10.20
   3  -8   3   71.99   13.00
   3   8   3   88.59   11.60
  -3   8  -3   74.29   13.50
  -4  -8  -3  123.29   13.40
   4  -8   3  114.39   17.40
  -4   8  -3  119.79   18.30
   5  -8   3   48.10   12.10
  -5  -8  -3   52.99    8.30
   5   8   3   36.40    6.80
  -5   8  -3   25.50   10.40
  -6  -8  -3   58.69    8.40
   6  -8   3   68.69   14.40
   6   8   3   64.89    8.60
  -6   8  -3   50.39   13.70
   7   8   3  111.79   10.90
   7   8   3  128.69   10.90
  -7   8  -3  103.79   19.10
   8  -8   3  109.29   18.90
  -8   8  -3   77.69   16.40
   9  -8   3   46.40   15.60
  -9   8  -3   57.89   18.40
  10  -8   3   34.50   18.50
 -10   8  -3    4.20   18.90
  11  -8   3   26.00   20.20
 -11   8  -3   93.19   25.40
  11  -9  -3  -11.80   19.50
 -11   9   3   10.40   20.50
 -10   9   3  -15.30   16.30
   9  -9  -3   -7.40   12.60
  -9   9   3   -1.90   13.10
  -8   9   3  273.87   32.40
   7  -9  -3   -3.50   10.20
  -7   9   3    7.30   10.10
  -6  -9   3   42.60    6.70
   6  -9  -3   58.89   13.20
  -6   9   3   63.29   13.60
   6   9  -3   58.59    7.70
  -5  -9   3  354.96   30.20
   5  -9  -3  396.66   36.30
  -5   9   3  411.96   35.90
   5   9  -3  351.86   30.80
  -4  -9   3  343.87   29.80
   4  -9  -3  351.66   35.30
   4   9  -3  315.87   28.40
  -4   9   3  299.87   30.90
  -3  -9   3   70.59   10.70
   3  -9  -3   77.39   14.10
   3   9  -3   78.19   12.00
  -3   9   3   63.39   12.50
  -2  -9   3   29.60    7.40
   2  -9  -3   14.60    7.90
  -2   9   3   29.60    9.00
   2   9  -3   24.10    7.40
  -1  -9   3  451.45   37.40
   1  -9  -3  416.86   37.70
  -1   9   3  426.86   38.00
   1   9  -3  453.65   38.10
   0  -9  -3  142.99   16.50
   0  -9   3  135.69   16.40
   0   9   3  148.79   16.40
   0   9  -3  116.69   17.00
   1  -9   3   19.30    6.50
  -1  -9  -3   32.60    8.30
  -1   9  -3   23.30    7.70
   1   9   3   17.90    6.40
   2  -9   3   41.20   10.30
  -2  -9  -3   40.60    8.60
   2   9   3   38.20    8.30
  -2   9  -3   43.60   10.80
   3  -9   3   32.40   10.00
  -3  -9  -3   33.40    7.80
   3   9   3   34.80    7.80
  -3   9  -3   43.50   11.20
   4  -9   3   58.99   12.70
  -4  -9  -3   68.69   10.80
   4   9   3   57.59    9.70
  -4   9  -3   56.39   13.00
   5  -9   3   90.69   16.90
  -5  -9  -3   96.29   12.40
   5   9   3   94.99   11.50
  -5   9  -3   71.39   15.70
   6  -9   3   37.50   12.40
  -6  -9  -3   23.60    6.50
   6   9   3   18.70    5.80
  -6   9  -3   22.80   11.70
   7  -9   3   46.60   14.50
   7   9   3   19.50    5.20
  -7   9  -3   12.30   12.90
  -8   9  -3   90.49   19.40
   9  -9   3   12.00   15.40
  -9   9  -3   19.20   15.20
  10  -9   3   90.29   27.10
 -10   9  -3   50.79   23.80
  11  -9   3   -0.10   22.20
 -11   9  -3   92.89   27.20
  11 -10  -3    9.90   22.70
 -11  10   3   16.80   22.40
  10 -10  -3   18.00   17.30
 -10  10   3   -2.80   17.70
   9 -10  -3  -13.30   14.50
  -9  10   3   19.00   14.70
   8 -10  -3  319.37   38.80
  -8  10   3  428.76   40.30
   7 -10  -3  192.08   26.70
  -7 -10   3  167.48   14.00
  -7 -10   3  184.88   14.10
  -7  10   3  186.98   26.10
  -6 -10   3    7.30    4.80
   6 -10  -3  -13.20    9.10
  -6  10   3   -6.30    8.70
   6  10  -3    8.60    5.20
   5 -10  -3  164.68   27.50
  -5 -10   3  176.08   18.30
   5  10  -3  184.28   19.00
  -5  10   3  241.28   24.70
   4 -10  -3  233.88   28.00
  -4 -10   3  315.17   25.50
  -4  10   3  265.27   28.10
   4  10  -3  257.97   25.50
   3 -10  -3  297.07   29.60
  -3 -10   3  275.27   28.50
   3  10  -3  274.17   27.20
  -3  10   3  305.57   29.20
   2 -10  -3  377.26   36.60
  -2 -10   3  405.66   35.10
  -2  10   3  459.75   37.60
   2  10  -3  387.96   35.80
   1 -10  -3   -0.20    5.90
  -1 -10   3    3.50    5.90
   1  10  -3    1.10    6.10
  -1  10   3    3.20    5.60
   0 -10   3   -1.10    5.20
   0 -10  -3  -10.50    5.60
   0  10  -3   -7.30    5.60
   0  10   3    1.30    5.70
  -1 -10  -3  296.27   27.60
   1 -10   3  328.27   29.10
   1  10   3  285.67   27.20
  -1  10  -3  241.28   27.80
   2 -10   3    5.10    6.30
  -2 -10  -3   -2.60    5.20
  -2  10  -3   -1.50    6.70
   2  10   3   -0.20    5.30
  -3 -10  -3    3.40    5.50
   3 -10   3   -3.80    6.60
   3  10   3    0.50    5.30
  -3  10  -3    9.20    8.50
   4 -10   3   20.40    9.10
  -4 -10  -3   25.20    7.70
  -4  10  -3   25.40   10.30
   4  10   3   25.20    7.20
   5 -10   3  136.09   21.20
  -5 -10  -3  125.69   15.30
  -5  10  -3  125.09   21.10
   5  10   3  130.09   14.80
  -6 -10  -3  163.98   17.20
   6 -10   3  155.78   22.90
  -6  10  -3  176.68   25.70
   6  10   3  162.28   16.80
   7 -10   3    6.60   11.80
  -7 -10  -3   -0.80    4.70
  -7  10  -3   -5.00   11.90
   7  10   3   -1.30    4.60
   8 -10   3   24.60   14.10
  -8  10  -3   27.70   16.00
   9 -10   3   -4.00   15.40
  -9  10  -3   -1.50   16.70
  10 -10   3   15.80   20.70
 -10  10  -3   38.40   22.40
  11 -10   3  -66.09   25.60
  10 -11  -3   10.30   20.80
 -10  11   3   39.80   21.50
  -9  11   3  286.77   38.20
   8 -11  -3  -23.40   12.90
  -8  11   3   -7.50   13.20
   7 -11  -3   15.60   13.70
  -7 -11   3   18.30    5.00
  -7  11   3   14.60   13.10
  -6 -11   3   43.10    8.50
   6  11  -3   56.69   10.20
  -6  11   3   49.50   14.60
  -5 -11   3   28.40    7.70
   5 -11  -3   32.10   12.10
   5  11  -3   35.00    8.70
  -5  11   3   19.30   10.90
   4 -11  -3   82.09   17.40
  -4 -11   3   76.39   12.40
   4  11  -3   54.89   12.00
  -4  11   3   97.89   16.40
  -3 -11   3  122.29   16.10
   3 -11  -3  117.79   18.70
  -3  11   3   99.59   17.30
   3  11  -3  110.79   16.20
   2 -11  -3  400.56   39.60
  -2  11   3  467.15   40.00
   2  11  -3  427.66   39.20
  -1 -11   3  174.18   19.80
   1 -11  -3  202.78   21.20
   1  11  -3  120.29   18.80
  -1  11   3  130.19   19.20
   0 -11  -3   47.60   11.20
   0 -11   3   48.30   11.50
   0  11   3   57.69   12.00
   0  11  -3   55.89   11.80
  -1 -11  -3    0.60    6.40
   1 -11   3   11.20    8.20
   1  11   3    3.70    6.10
  -1  11  -3    8.40    8.50
  -2 -11  -3  387.16   35.80
   2 -11   3  382.06   37.20
   2  11   3  407.86   35.80
  -2  11  -3  399.96   38.40
  -3 -11  -3  292.27   30.20
   3 -11   3  299.47   32.50
   3  11   3  399.16   31.20
  -3  11  -3  308.57   33.80
  -4 -11  -3   24.50    8.10
   4 -11   3   17.30   10.60
  -4  11  -3   11.40    9.20
   4  11   3    4.50    6.10
   5 -11   3    9.70   10.10
  -5 -11  -3   11.50    7.20
   5  11   3    4.60    6.20
  -5  11  -3   28.40   13.50
  -6 -11  -3    1.20    6.80
   6 -11   3    1.50   11.30
   6  11   3    1.50    6.10
  -6  11  -3   -6.50   11.60
  -7 -11  -3   21.90    7.00
   7 -11   3   39.50   14.70
   7  11   3   17.70    7.10
  -7  11  -3   30.50   14.70
   8 -11   3    8.20   14.90
  -8  11  -3   30.50   16.30
   9 -11   3  -25.10   18.40
  -9  11  -3   24.20   20.20
  10 -11   3   23.00   22.30
 -10  11  -3    5.00   24.50
 -10  12   3   19.30   21.90
   9 -12  -3  -26.50   16.80
  -9  12   3    3.30   18.30
   8 -12  -3    1.70   15.80
  -8  12   3   18.70   16.50
  -7 -12   3   28.10    7.00
  -7  12   3   44.00   15.30
   7  12  -3   32.30    7.70
   6 -12  -3  -18.40   12.30
  -6 -12   3    1.00    6.30
  -6  12   3   22.30   13.70
   6  12  -3   -1.20    7.10
   5 -12  -3  172.78   25.50
  -5 -12   3  151.38   18.30
  -5  12   3  158.08   24.70
   5  12  -3  170.08   20.00
   4 -12  -3   57.99   16.30
  -4 -12   3   69.69   14.10
   4  12  -3  101.49   15.10
  -4  12   3   83.69   17.30
   3 -12  -3   25.30   12.20
  -3 -12   3   38.30   10.50
  -3  12   3   10.40    9.00
   3  12  -3   29.20    9.60
   2 -12  -3   23.90   10.80
  -2 -12   3   31.50   10.30
   2  12  -3   22.10    9.90
  -2  12   3   41.60   11.20
   1 -12  -3  458.45   43.00
   1  12  -3  441.86   43.00
  -1  12   3  511.85   43.40
   0 -12  -3  174.78   22.50
   0 -12   3  136.59   20.50
   0  12  -3  178.08   23.10
   0  12   3  140.29   20.50
  -1 -12  -3   23.40    9.40
   1 -12   3   12.20    9.40
  -1  12  -3    5.40    8.70
   1  12   3    6.90    7.30
   2 -12   3  122.59   20.00
  -2 -12  -3  132.29   18.30
   2  12   3   89.09   15.60
  -2  12  -3  100.89   18.20
   3 -12   3   40.90   13.30
  -3 -12  -3   52.89   11.50
   3  12   3   43.90   11.00
  -3  12  -3   41.10   13.70
   4 -12   3  345.57   36.50
   4  12   3  317.87   31.70
  -4  12  -3  393.26   38.40
   5 -12   3   15.10   13.20
  -5 -12  -3    6.20    7.80
   5  12   3   16.20    7.80
  -5  12  -3   25.30   13.70
  -6 -12  -3   13.90    8.60
   6 -12   3   11.60   14.20
  -6  12  -3   42.50   16.90
   6  12   3   24.70    8.70
   7 -12   3   73.59   19.20
  -7 -12  -3   68.19   12.70
  -7  12  -3   35.50   17.20
   7  12   3   64.69   10.90
   8 -12   3    9.30   18.00
   8  12   3   -2.70    3.80
   8  12   3    5.50    4.40
  -8  12  -3   21.10   18.10
   9 -12   3  130.79   30.60
  -9  12  -3  121.99   29.30
 -10  12  -3   -4.40   25.30
  10 -13  -3   22.30   25.40
 -10  13   3  -25.30   23.30
   9 -13  -3   -1.10   21.40
  -9  13   3  -26.80   19.70
   8 -13  -3  224.38   35.50
  -8  13   3   98.79   25.80
   7 -13  -3    2.20   15.10
  -7 -13   3   16.40    7.60
  -7  13   3   12.80   16.90
   7  13  -3   11.60    7.80
   6 -13  -3  177.88   27.30
  -6 -13   3  160.38   18.80
  -6  13   3  139.69   24.60
   6  13  -3  107.29   17.80
   5 -13  -3   -8.30   11.50
  -5  13   3    4.40   11.10
   5  13  -3    4.30    8.60
   4 -13  -3   13.50   11.90
  -4 -13   3   -3.20    7.90
   4  13  -3   37.90   12.00
  -4  13   3   38.40   14.90
  -3 -13   3   -0.80    7.60
   3 -13  -3   35.40   13.50
  -3  13   3   26.00   11.00
   3  13  -3   42.50   12.80
  -2 -13   3   14.90    8.40
   2 -13  -3   -5.60   10.00
   2  13  -3   13.20    9.60
  -2  13   3   -1.70    9.20
  -1 -13   3    0.00    8.30
   1 -13  -3    9.50    8.90
  -1  13   3   -2.60    7.60
   1  13  -3   -3.10    8.80
   0 -13   3  113.89   17.90
   0 -13  -3   76.89   15.30
   0  13  -3   74.69   16.60
   0  13   3   75.79   15.40
   1 -13   3   23.00   10.90
  -1 -13  -3   38.70   12.00
  -1  13  -3   48.40   13.60
   1  13   3   38.10   11.20
  -2 -13  -3  186.18   24.20
   2 -13   3  197.28   26.40
  -2  13  -3  161.88   26.40
   2  13   3  212.28   23.10
   3 -13   3  250.87   30.30
  -3 -13  -3  232.48   26.40
   3  13   3  278.27   27.60
  -3  13  -3  237.18   29.70
   4 -13   3   78.99   18.70
  -4  13  -3   78.19   17.50
   4  13   3   63.09   13.30
   5 -13   3   37.60   16.20
   5  13   3   41.10   11.70
  -5  13  -3   49.60   16.60
   6 -13   3   55.39   18.20
  -6 -13  -3   36.20   12.50
  -6  13  -3   23.40   16.70
   6  13   3   34.40   10.20
   7 -13   3   25.80   18.30
  -7 -13  -3   32.20    9.80
   7  13   3   19.30    8.70
  -7  13  -3   49.10   19.00
   8  13   3   27.80    7.40
  -8  13  -3   39.40   21.20
   9 -13   3   34.00   24.80
  -9  13  -3    6.20   22.70
   9 -14  -3  -10.60   23.50
  -9  14   3   17.00   27.10
  -8 -14   3   72.29    9.10
  -8 -14   3   90.29   10.50
   8 -14  -3   85.59   25.50
  -8  14   3   83.19   26.60
  -7 -14   3   15.90    9.00
   7 -14  -3   37.70   20.70
  -7  14   3   27.50   18.20
   7  14  -3    8.30    9.10
   6 -14  -3   59.69   20.30
  -6 -14   3   53.59   11.90
  -6  14   3   31.70   18.10
   6  14  -3   64.99   14.30
   5 -14  -3   34.20   16.90
  -5  14   3   81.59   18.40
   5  14  -3   64.89   22.10
   4 -14  -3   31.60   15.00
  -4  14   3    6.60   12.30
   4  14  -3    4.20   10.70
  -3 -14   3   14.40    9.70
   3 -14  -3   -5.20   12.60
  -3  14   3   -3.10   11.40
   3  14  -3   22.20   11.80
  -2 -14   3   32.80   13.00
   2 -14  -3   19.90   13.20
   2  14  -3   40.50   13.50
   1 -14  -3    8.90   11.20
  -1 -14   3    8.20    9.70
   1  14  -3   20.50   11.20
  -1  14   3   -7.60    9.40
   0 -14   3  284.37   32.40
   0 -14  -3  273.57   32.10
   0  14  -3  328.67   34.50
   0  14   3  308.77   32.70
  -1 -14  -3  340.67   37.30
   1 -14   3  371.16   38.60
   1  14   3  412.26   38.30
  -1  14  -3  402.56   40.00
  -2 -14  -3   28.80   12.10
   2 -14   3   19.40   11.80
   2  14   3    3.30    9.50
  -3 -14  -3   17.00   11.40
   3 -14   3   56.19   16.20
  -3  14  -3   44.60   16.10
   3  14   3   22.00   11.20
   4 -14   3   27.70   13.20
  -4  14  -3   19.00   14.10
   4  14   3   23.10   11.20
   5 -14   3  133.39   25.80
   5  14   3  114.69   18.70
  -5  14  -3  123.19   24.70
  -6 -14  -3   15.20   10.00
   6 -14   3    4.30   17.00
   6  14   3   -4.60    9.00
  -6  14  -3  -31.40   15.50
   7 -14   3   -1.30   20.10
  -7 -14  -3  -13.40   13.70
  -7  14  -3  -23.80   19.00
   8 -14   3   39.50   25.40
  -8  14  -3   21.80   22.30
   9 -14   3  -21.20   29.20
  -9  14  -3   43.40   26.20
   9 -15  -3   51.19   29.50
  -9  15   3   19.30   27.80
   8 -15  -3   20.50   24.30
  -8  15   3   43.60   24.50
   7 -15  -3   50.19   21.70
  -7  15   3    5.70   20.00
  -6 -15   3  138.39   20.40
   6 -15  -3  195.38   31.10
   6  15  -3  150.88   21.30
  -6  15   3  130.29   25.60
   5 -15  -3  243.88   35.50
  -5  15   3  250.37   34.70
   5  15  -3  237.28   29.40
   4 -15  -3  187.08   28.80
  -4  15   3  223.78   30.70
   3 -15  -3   -2.20   16.10
  -3 -15   3   19.60   11.70
   3  15  -3    7.70   12.10
  -3  15   3   12.40   13.80
  -2 -15   3   85.59   16.50
   2 -15  -3   96.99   19.60
  -2  15   3   85.59   18.50
   2  15  -3   49.70   16.50
   1 -15  -3  128.09   23.50
  -1 -15   3  148.09   22.80
   1  15  -3  113.59   22.10
  -1  15   3  166.28   24.90
   0 -15  -3  338.47   38.20
   0 -15   3  361.46   38.90
   0  15   3  345.87   38.10
   0  15  -3  441.66   41.20
   1 -15   3  117.49   21.30
  -1 -15  -3  108.69   20.50
   1  15   3  111.19   20.60
  -1  15  -3   97.29   21.30
   2 -15   3  696.63   64.19
  -2 -15  -3  829.32   63.99
  -2  15  -3  659.73   65.29
   2  15   3  699.13   61.89
   3  15   3   -4.60   10.40
  -3  15  -3   -9.40   13.60
   4 -15   3  -15.00   12.90
  -4  15  -3   -1.50   14.90
   4  15   3    0.60   10.70
   5 -15   3    1.90   15.30
  -5  15  -3   -2.90   15.60
   5  15   3    2.80   11.30
   6 -15   3   50.59   22.50
  -6  15  -3   19.90   18.80
   7 -15   3  -13.90   21.90
  -7  15  -3   23.70   20.70
   8 -15   3    7.20   25.10
  -8  15  -3    3.70   24.20
   8 -16  -3  -42.30   24.20
  -8  16   3  -13.40   25.90
   7 -16  -3   34.50   24.30
  -7  16   3   58.79   25.50
   6 -16  -3   -5.80   20.30
  -6  16   3   28.10   19.70
  -5 -16   3  -26.10   11.40
   5 -16  -3   30.00   17.00
   5  16  -3   -0.70   13.20
  -5  16   3   18.70   17.20
   4 -16  -3   54.39   18.80
  -4 -16   3   13.30   11.30
  -4  16   3   37.40   17.90
   4  16  -3   35.30   14.90
   3 -16  -3   15.80   15.30
   3  16  -3   -0.50   14.10
  -3  16   3   44.90   16.40
   2 -16  -3   32.40   15.50
  -2  16   3   18.60   15.00
   2  16  -3   32.50   15.20
   1 -16  -3    3.10   13.20
  -1 -16   3   23.70   14.10
  -1  16   3    4.10   12.40
   1  16  -3    2.10   13.50
   0 -16  -3   69.29   18.30
   0 -16   3   76.49   18.00
   0  16  -3   65.49   20.30
   0  16   3  103.69   21.00
  -1 -16  -3   37.30   14.90
   1 -16   3   -1.40   13.90
  -1  16  -3   20.10   15.70
   1  16   3   40.70   15.20
   2 -16   3   11.70   14.00
  -2  16  -3   22.50   15.60
   2  16   3   33.60   14.90
  -3 -16  -3   23.20   13.90
   3 -16   3   53.59   18.40
   3  16   3   27.70   14.40
  -3  16  -3   -5.50   16.60
   4 -16   3   38.50   20.20
  -4 -16  -3   25.70   13.50
   4  16   3   46.10   15.90
  -4  16  -3   51.89   21.60
   5 -16   3   41.20   21.00
   6 -16   3   47.80   23.40
  -6  16  -3    9.80   20.90
   7 -16   3  -29.90   26.50
  -7  16  -3   36.40   24.90
   8 -16   3  -12.50   29.80
  -8  16  -3  -34.90   28.10
   8 -17  -3   93.29   34.50
  -8  17   3   48.20   32.60
   7 -17  -3   11.90   27.70
  -7  17   3    5.30   25.90
   6 -17  -3   33.10   25.20
  -6  17   3   15.10   27.70
   5 -17  -3    5.90   19.50
  -5  17   3  -19.60   20.20
  -4 -17   3   22.70   17.00
   4 -17  -3   32.70   19.10
  -4  17   3    1.00   16.60
  -3 -17   3    0.50   13.80
   3 -17  -3   19.90   16.90
  -3  17   3   16.50   17.80
   3  17  -3    1.80   15.20
  -2 -17   3   -3.80   13.90
   2 -17  -3   13.90   16.80
  -2  17   3  -19.80   16.70
   2  17  -3    9.10   15.70
   1 -17  -3   -7.10   14.00
  -1  17   3    1.90   14.40
   1  17  -3    0.40   16.00
   0 -17   3   14.50   15.50
   0 -17  -3   18.10   16.50
   0  17   3    7.40   14.50
   0  17  -3   24.50   16.70
   1 -17   3   60.99   18.10
   1  17   3   12.90   18.30
  -1  17  -3   51.69   19.90
   2 -17   3  -20.60   14.70
  -2 -17  -3   -7.70   13.90
  -2  17  -3  -12.60   17.90
   2  17   3   -2.70   14.50
   3 -17   3    9.30   18.10
  -3 -17  -3   -4.90   14.90
   3  17   3   10.00   15.30
  -3  17  -3   18.20   18.20
   4 -17   3  103.09   26.20
  -4  17  -3   82.39   22.50
   5 -17   3   12.70   21.90
  -5  17  -3    5.50   21.70
  -6  17  -3   18.00   25.60
   7 -17   3   -4.20   28.70
  -7  17  -3    9.10   28.90
   7 -18  -3    4.60   29.30
  -7  18   3   -1.60   28.10
   6 -18  -3    8.90   26.60
  -6  18   3   55.49   28.00
   5 -18  -3    0.10   22.90
  -5  18   3  -15.20   21.20
   4 -18  -3   22.20   22.20
  -4  18   3  -29.80   21.40
   3 -18  -3  -16.40   18.20
  -3  18   3   32.90   20.80
   2 -18  -3  206.88   33.60
  -2 -18   3  192.48   29.90
  -2  18   3  219.28   33.90
   2  18  -3  140.59   28.90
  -1 -18   3   18.50   17.10
   1  18  -3   16.40   18.20
  -1  18   3   38.20   20.70
   0  18   3   62.99   21.60
   0  18  -3   40.00   29.60
   1 -18   3   64.69   30.40
  -1 -18  -3   96.39   23.40
   1  18   3   87.49   22.00
  -1  18  -3  122.99   27.30
   2 -18   3  -17.00   18.20
  -2 -18  -3   -6.40   16.70
   2  18   3    4.10   17.00
  -2  18  -3  -15.60   20.70
   3 -18   3  -14.50   19.60
  -3  18  -3   -9.90   19.60
   4 -18   3  -14.00   21.70
  -4  18  -3   17.70   22.70
   5 -18   3  -13.10   23.60
  -5  18  -3   -3.60   24.50
   6 -18   3   -7.30   26.20
  -6  18  -3   20.50   29.50
   7 -18   3   12.00   34.30
  -7  18  -3    5.10   30.90
   7 -19  -3  148.49   59.79
   6 -19  -3    2.40   30.70
  -6  19   3  -29.60   28.80
   5 -19  -3   -1.00   25.80
  -5  19   3  -16.40   28.10
   4 -19  -3   -1.90   24.40
  -4  19   3  -10.00   22.00
   3 -19  -3  -11.10   20.60
  -3  19   3  -26.20   20.90
  -1 -19   3   15.70   20.40
   1 -19  -3   11.80   20.10
   1  19  -3   -9.10   23.10
  -1  19   3   11.20   23.10
   0 -19  -3  -23.30   20.10
   0 -19   3   13.50   18.70
   0  19  -3   19.40   21.30
   0  19   3   30.80   21.20
  -1 -19  -3   37.70   21.50
   1 -19   3    0.60   19.50
  -1  19  -3   25.20   23.20
   3 -19   3  -27.10   27.00
  -3  19  -3   11.40   24.30
   4 -19   3   -3.90   24.90
  -4  19  -3   21.20   27.00
   5 -19   3    0.40   29.10
  -5  19  -3   71.09   30.60
   6 -19   3   25.70   35.90
  -6  19  -3   -4.20   32.00
   6 -20  -3  -11.70   35.30
  -6  20   3    3.00   36.40
   5 -20  -3  107.79   35.90
  -5  20   3   80.79   35.90
   3 -20  -3  -15.20   24.00
  -3  20   3  -64.59   26.40
   2 -20  -3  -37.00   22.80
  -2  20   3  -55.49   23.60
   1 -20  -3  213.18   35.20
  -1  20   3  117.59   35.10
   1 -20   3   -1.80   22.80
  -1  20  -3   52.39   28.60
   2 -20   3    4.30   25.10
  -2  20  -3    1.80   28.60
   3 -20   3  135.39   35.70
  -3  20  -3  192.38   36.10
  -5  20  -3   22.70   35.30
   6 -20   3  -63.49   52.79
   5 -21  -3    2.40   35.80
  -5  21   3  -90.29   35.80
   4 -21  -3   16.90   32.60
  -4  21   3   -5.00   31.20
   3 -21  -3   19.00   31.60
  -3  21   3  -29.00   41.50
   3 -21   3   15.00   30.20
   4 -21   3   54.19   36.20
  -4  21  -3   43.10   39.50
   5 -21   3  -45.20   39.30
  -5  21  -3   38.90   42.30
 -10   0   4    6.10    5.20
  10   0  -4    3.60    4.10
  -9   0   4  180.48   17.30
   9   0  -4  170.48   16.30
   8   0  -4  408.16   32.70
  -8   0   4  415.46   33.20
  -7   0   4   17.90    4.80
   7   0  -4   20.20    5.30
   6   0  -4  600.64   45.80
  -6   0   4  596.04   45.60
   5   0  -4  290.47   23.80
   4   0  -4  560.54   42.90
  -4   0   4  565.44   42.70
   3   0  -4 1549.14  110.59
  -3   0   4 1485.75  110.39
  -1   0   4    3.40    2.20
   1   0  -4    2.80    2.00
   0   0   4 2431.86  179.58
   0   0  -4 2547.05  179.78
   2   0   4 3145.29  226.78
   3   0   4  755.52   59.49
   3   0   4  816.32   59.79
   4   0   4 1515.05  111.89
   5   0   4  136.29   16.00
   6   0   4   36.70    9.40
   6   0   4   41.50    7.70
   7   0   4   48.70    9.30
   7   0   4   57.59    9.80
   8   0   4   46.20    9.80
   8   0   4   37.10    8.20
   9   0   4  110.19   13.90
   9   0   4  101.09   14.30
  10   0   4    6.60    7.30
  10   0   4    8.90    7.60
  11   0   4   23.20    8.40
  12  -1  -4    5.30    3.30
  11  -1  -4    0.40    6.10
 -11   1   4   -3.10    7.30
  10  -1  -4   14.00    6.70
 -10   1   4    4.50    7.20
  -9  -1   4   40.20    5.60
   9  -1  -4   37.30    8.10
  -9   1   4   47.80    9.30
   9   1  -4   42.50    5.20
   8  -1  -4   98.89   11.80
  -8  -1   4   81.59    9.40
  -8   1   4  103.79   12.40
   8   1  -4   83.29    9.00
   7  -1  -4    7.30    4.70
  -7  -1   4    9.20    3.40
   7   1  -4    7.10    3.10
  -7   1   4    9.10    4.60
   6  -1  -4   56.99    8.60
  -6  -1   4   59.59    6.90
  -6   1   4   55.29    8.10
   6   1  -4   64.59    7.40
   5  -1  -4 1555.24  120.09
  -5  -1   4 1665.63  118.89
  -5   1   4 1674.03  120.09
   5   1  -4 1666.23  119.09
   4  -1  -4   35.30    5.70
  -4  -1   4   25.30    4.50
   4   1  -4   27.80    4.70
  -4   1   4   27.30    5.20
  -3  -1   4  683.73   52.69
   3  -1  -4  736.73   53.69
   3   1  -4  706.73   52.89
  -3   1   4  713.03   53.39
  -2  -1   4  112.09    9.30
   2   1  -4   89.49    9.00
  -2   1   4   76.89    8.90
  -1  -1   4   54.49    6.50
   1  -1  -4   55.89    6.80
  -1   1   4   64.49    7.10
   0  -1   4  913.61   69.89
   0  -1   4  886.91   69.89
   0  -1  -4 1029.00   70.19
   0   1   4  945.31   69.89
  -1  -1  -4   -0.50    1.90
   1  -1   4    0.60    2.20
  -1   1  -4    0.60    2.00
   1   1   4   -1.40    3.10
  -2   1  -4 1635.44  112.69
   2   1   4 1432.66  111.69
  -3   1  -4  627.24   48.20
   3   1   4  624.04   47.40
   3   1   4  609.74   47.60
   4  -1   4   39.10    7.60
   4   1   4   43.20    7.50
   4   1   4   49.60    7.40
  -4   1  -4   39.50    8.00
   5  -1   4   20.00    6.30
  -5   1  -4   16.60    5.50
   5   1   4   24.70    5.60
   5   1   4   16.20    5.20
   6  -1   4 1004.60   77.79
   6   1   4 1030.00   76.79
   7  -1   4   31.30    8.50
  -7   1  -4   30.00    8.40
   7   1   4   37.20    7.70
   7   1   4   39.30    7.50
   8  -1   4    2.70    6.20
   8   1   4   -7.30    4.60
   8   1   4    3.50    5.30
   9  -1   4   15.70    7.70
   9  -1   4   11.60    8.60
   9   1   4   -0.50    5.50
  10  -1   4   15.60    9.60
  10   1   4   10.40    6.40
  10   1   4   14.20    6.90
  11  -1   4    6.20    8.80
  11   1   4    4.20    5.50
  11   1   4   13.10    7.40
  12  -2  -4   -1.00    8.10
 -12   2   4   12.80    9.90
  11  -2  -4   12.50    8.10
 -11   2   4    0.80    9.50
  10  -2  -4  125.09   15.70
 -10   2   4  123.99   16.70
   9  -2  -4   49.30   10.20
  -9   2   4   55.89   10.50
   8  -2  -4   17.40    7.00
  -8   2   4   27.90    7.90
   7  -2  -4   86.29   11.70
  -7  -2   4   80.09    7.70
  -7   2   4   79.49   11.60
  -6  -2   4  181.98   14.50
   6  -2  -4  166.08   19.10
  -6   2   4  177.18   17.30
   6   2  -4  182.78   14.90
   5  -2  -4    1.40    3.40
  -5  -2   4    4.20    2.20
  -5   2   4    7.20    4.00
   5   2  -4    6.40    2.70
   4  -2  -4 1329.37  100.69
  -4  -2   4 1354.36   99.69
  -4   2   4 1402.76  100.59
   4   2  -4 1363.06   99.09
  -3  -2   4   54.39    6.20
  -3   2   4   53.29    7.80
  -2  -2   4 1016.20   73.19
  -2  -2   4  956.00   72.79
  -2   2   4 1003.10   73.79
   1  -2  -4  140.69   14.10
  -1  -2   4  167.28   14.30
  -1   2   4  168.28   14.50
   0  -2  -4  472.05   34.40
   0  -2   4  476.15   34.70
   0   2  -4  420.56   34.30
   0   2   4  387.36   33.90
   1  -2   4   54.09    8.40
  -1   2  -4   71.59    8.20
   1   2   4   63.79    7.40
  -2  -2  -4  483.55   36.20
   2  -2   4  500.15   37.60
  -2   2  -4  436.96   37.00
   2   2   4  442.76   36.10
  -3   2  -4    7.40    3.90
   3   2   4    5.30    3.10
   4  -2   4   15.70    6.00
   4   2   4   19.70    5.10
   4   2   4   14.50    4.00
  -4   2  -4   14.80    5.60
   5  -2   4  212.68   20.70
   5   2   4  219.88   18.80
  -5   2  -4  217.88   21.00
   5   2   4  202.78   19.00
   6  -2   4    2.50    5.90
   6   2   4   11.80    5.60
  -6   2  -4   22.70    6.80
   6   2   4   17.20    5.60
   7  -2   4   88.09   14.30
   7   2   4  115.89   12.80
  -7   2  -4  130.79   16.80
   7   2   4  129.69   12.80
   8  -2   4   11.80    7.40
  -8   2  -4   11.90    8.30
   8   2   4    4.10    4.50
   8   2   4   11.50    5.10
   9  -2   4    5.80    8.30
  -9   2  -4   -0.70    8.90
   9   2   4   13.00    5.50
   9   2   4    9.30    4.90
  10  -2   4   62.59   12.60
  10   2   4   44.70    6.30
  11  -2   4  -11.30   10.10
  12  -2   4   19.50   12.70
  13  -3  -4   50.29   12.90
 -13   3   4   34.90   15.10
  12  -3  -4   37.80   12.50
 -12   3   4   32.50   13.30
  11  -3  -4    4.00    9.00
 -11   3   4    0.40   10.90
  10  -3  -4   29.30   10.30
 -10   3   4   55.69   13.10
   9  -3  -4  161.58   19.30
  -9   3   4  170.68   20.20
   8  -3  -4  368.86   33.90
  -8   3   4  415.66   34.90
   7  -3  -4  270.07   25.50
  -7   3   4  286.57   27.60
  -6  -3   4  262.77   20.80
  -6  -3   4  287.67   20.70
   6  -3  -4  255.97   25.00
  -6   3   4  307.37   25.30
   5  -3  -4   19.80    5.80
  -5  -3   4   19.00    3.40
  -5  -3   4   22.10    3.50
  -5   3   4   27.00    6.20
  -4  -3   4  343.37   25.60
  -4  -3   4  311.67   25.70
  -4   3   4  339.47   27.90
  -3  -3   4   55.59    6.40
  -3  -3   4   52.09    6.50
  -3   3   4   61.49    8.60
   2  -3  -4  326.67   26.50
  -2  -3   4  303.97   25.30
  -2   3   4  320.57   26.30
  -1  -3   4   26.30    4.80
   1  -3  -4   18.90    4.50
  -1   3   4   16.10    4.50
   1   3  -4   17.30    3.90
   0  -3  -4 4264.27  331.77
   0   3   4 4571.24  332.27
   0   3  -4 5054.29  332.87
   1  -3   4  238.18   21.20
  -1  -3  -4  291.87   20.90
   1   3   4  217.18   20.10
  -1   3  -4  220.48   20.90
  -2  -3  -4   28.30    5.00
   2  -3   4   26.90    6.10
  -2   3  -4   44.70    7.70
   2   3   4   17.30    4.20
  -3  -3  -4 1907.21  145.79
   3   3   4 2051.69  146.09
  -3   3  -4 2078.89  148.29
   4   3   4  483.55   36.40
  -4   3  -4  438.26   38.50
   5  -3   4   32.00    7.90
   5   3   4   26.60    5.90
   5   3   4   29.50    5.70
  -5   3  -4   36.00    8.70
   6  -3   4  102.39   14.90
   6   3   4   99.99   11.70
  -6   3  -4  101.49   15.70
   6   3   4  117.89   11.60
   7  -3   4   35.40    9.90
   7   3   4   45.50    7.70
  -7   3  -4   63.59   12.50
   7   3   4   58.09    7.80
   8  -3   4   14.00    7.90
  -8   3  -4  -10.00    8.00
   8   3   4   11.80    4.50
   8   3   4    9.20    4.30
   9  -3   4  111.79   17.10
   9   3   4  107.49   10.60
   9   3   4  108.49   10.30
  -9   3  -4  128.89   18.70
  10  -3   4   23.60   10.70
 -10   3  -4   25.10   13.30
  11  -3   4   64.59   15.00
  12  -3   4    9.80   14.60
  13  -3   4   30.90   17.70
  12  -4  -4  -12.00   12.90
 -12   4   4   -3.70   14.60
  11  -4  -4   30.80   19.60
 -11   4   4   31.60   14.10
  10  -4  -4   96.59   16.60
 -10   4   4  103.29   17.40
   9  -4  -4  242.38   25.20
  -9   4   4  218.58   25.30
   8  -4  -4  372.16   33.50
  -8   4   4  365.76   33.70
   7  -4  -4   42.20    9.30
  -7   4   4   35.30    8.90
   6  -4  -4   -7.80    4.60
  -6   4   4   -5.10    4.40
  -5  -4   4   20.40    3.60
   5  -4  -4   22.20    6.70
  -5  -4   4   28.10    3.80
  -5   4   4   12.80    5.30
  -4  -4   4  650.23   51.49
  -4  -4   4  702.93   51.89
  -4   4   4  749.82   54.69
   3  -4  -4   89.09   11.00
  -3  -4   4   93.89    9.70
  -3   4   4  107.39   11.50
   2  -4  -4   -1.60    2.90
  -2  -4   4    2.20    2.40
  -2   4   4   -1.40    3.20
   2   4  -4    3.00    2.70
  -1  -4   4 1055.49   81.29
   1  -4  -4 1146.89   81.99
   1   4  -4 1048.20   81.39
  -1   4   4 1123.29   81.69
   0  -4   4 1009.60   69.79
   0   4   4  857.81   66.69
   0   4  -4  818.72   67.09
   1  -4   4  141.69   13.80
  -1  -4  -4  161.68   13.20
   1   4   4  105.99   12.10
  -1   4  -4  105.69   13.10
   2  -4   4   44.50    8.60
  -2  -4  -4   44.10    7.30
  -2   4  -4   53.89    9.20
   2   4   4   54.49    7.80
   3  -4   4  773.22   65.79
  -3  -4  -4  873.11   63.99
   3   4   4  872.01   63.99
  -3   4  -4  876.81   66.49
  -4  -4  -4  953.60   75.39
   4   4   4 1026.10   75.39
  -4   4  -4 1078.19   78.89
   5  -4   4  340.67   29.90
   5   4   4  315.97   26.20
  -5   4  -4  310.67   29.40
   5   4   4  306.97   25.70
   6  -4   4   76.09   13.10
  -6   4  -4   97.69   15.80
   6   4   4   95.09   10.80
   6   4   4   98.69   10.30
   7  -4   4   28.60    8.40
  -7   4  -4   21.10    8.80
   7   4   4   17.60    4.60
   7   4   4   20.40    5.00
   8  -4   4    6.20    8.20
   8   4   4   -0.70    3.20
  -8   4  -4    2.30    9.20
   8   4   4    5.60    3.40
   9  -4   4   84.99   15.30
  -9   4  -4   81.09   17.40
  10  -4   4   12.40   12.30
 -10   4  -4   15.60   13.80
  11  -4   4   -7.20   15.80
 -11   4  -4   -7.80   15.60
  12  -4   4  -11.30   15.70
  13  -4   4   36.40   24.80
  13  -5  -4   72.59   21.30
 -13   5   4   46.90   21.30
  12  -5  -4   36.60   16.00
 -12   5   4   42.60   18.50
  11  -5  -4    7.50   12.80
 -11   5   4   14.80   13.70
  10  -5  -4   88.39   16.10
 -10   5   4   66.59   15.40
   9  -5  -4   -1.00    8.50
  -9   5   4   12.30   10.00
   8  -5  -4    6.80    7.50
  -8   5   4   13.60    9.00
   7  -5  -4 1021.70   78.09
  -7   5   4  963.30   77.29
   6  -5  -4    6.50    6.00
  -6   5   4    7.30    5.40
  -5  -5   4  133.49   12.40
  -5  -5   4  154.98   12.40
  -5   5   4  146.69   16.30
  -4  -5   4  146.79   13.30
  -4  -5   4  138.49   13.10
   4  -5  -4  204.28   17.60
  -4   5   4  121.79   15.20
   3  -5  -4  828.32   64.19
  -3  -5   4  787.02   61.99
   3   5  -4  832.92   62.29
  -3   5   4  869.11   64.29
  -2  -5   4  446.96   35.80
   2  -5  -4  422.16   36.60
  -2   5   4  477.95   36.90
   2   5  -4  448.26   35.90
   1  -5  -4   39.70    7.40
  -1  -5   4   50.19    7.80
   1   5  -4   29.10    6.60
  -1   5   4   44.10    7.50
   0  -5   4  765.32   57.19
   0  -5  -4  796.62   56.99
   0   5  -4  700.33   56.99
   0   5   4  684.53   56.29
  -1  -5  -4   74.29    9.50
   1  -5   4   64.89   10.20
   1   5   4   48.90    8.00
  -1   5  -4   34.80    7.80
  -2  -5  -4  160.88   15.70
   2  -5   4  180.98   17.60
  -2   5  -4  180.38   17.80
   2   5   4  153.08   15.60
   3  -5   4    6.00    4.90
  -3  -5  -4   12.30    4.30
   3   5   4    7.40    3.60
  -3   5  -4    7.50    5.10
   4  -5   4    3.70    5.60
  -4  -5  -4   -2.30    2.90
   4   5   4    2.60    3.10
  -4   5  -4   12.10    6.40
   5   5   4  125.49   12.60
  -5   5  -4  145.89   18.70
   6  -5   4   24.70    9.20
   6   5   4   16.50    4.90
  -6   5  -4   14.50    8.20
   6   5   4   12.50    4.20
   7  -5   4   23.80    9.50
   7   5   4   29.00    5.80
   7   5   4   38.10    5.90
  -7   5  -4   49.30   12.50
   8   5   4  340.57   26.20
  -8   5  -4  402.86   36.60
   8   5   4  354.56   26.20
   9  -5   4   -1.70   11.30
  -9   5  -4    1.70   11.80
  10  -5   4   42.30   15.20
 -10   5  -4   17.20   15.50
  11  -5   4   32.50   15.70
 -11   5  -4   31.50   19.20
  12  -5   4    4.70   18.20
  13  -6  -4    1.20   21.00
 -13   6   4   35.60   25.50
  12  -6  -4   20.20   16.50
  11  -6  -4  -25.40   13.80
 -11   6   4    5.60   15.00
  10  -6  -4  -10.10   10.90
 -10   6   4   14.00   12.60
   9  -6  -4   20.80   10.30
  -9   6   4   25.20   11.10
   8  -6  -4   73.49   13.80
  -8   6   4   71.39   14.40
   7  -6  -4   22.80    9.30
  -7   6   4   25.50    9.10
   6  -6  -4  223.78   31.60
  -6  -6   4  185.28   14.40
  -6  -6   4  191.78   14.50
  -6   6   4  194.48   20.80
  -5  -6   4  468.65   33.50
   5  -6  -4  387.56   37.20
  -5  -6   4  408.06   33.20
  -5   6   4  482.25   38.20
   4  -6  -4  125.79   16.10
  -4  -6   4  149.19   13.80
   4   6  -4  139.39   13.60
  -4   6   4  161.58   16.80
   3  -6  -4  433.06   35.50
  -3  -6   4  385.86   32.80
   3   6  -4  405.46   33.30
  -3   6   4  425.06   35.10
  -2  -6   4 1352.16  102.79
   2  -6  -4 1437.96  104.39
   2   6  -4 1377.56  103.29
  -1  -6   4 1392.96  100.79
   1  -6  -4 1437.16  101.39
   1   6  -4 1209.28  100.49
  -1   6   4 1360.56  100.99
   0  -6  -4  107.39   11.40
   0  -6   4   77.29   11.30
   0   6   4   78.09   11.00
   0   6  -4   63.79   10.70
  -1  -6  -4   35.10    6.60
   1  -6   4   24.40    6.70
  -1   6  -4   27.70    7.40
   1   6   4   21.00    5.70
  -2  -6  -4  155.18   15.90
   2  -6   4  154.38   17.70
   2   6   4  160.58   16.00
  -2   6  -4  201.68   19.30
   3  -6   4 1031.00   79.09
  -3  -6  -4 1019.00   76.19
  -3   6  -4  999.30   78.99
   3   6   4 1002.30   75.99
   4  -6   4   80.99   13.60
  -4  -6  -4   79.19   10.30
  -4   6  -4   77.39   14.10
   4   6   4   79.79   10.40
  -5  -6  -4   -2.10    3.40
   5  -6   4   -2.50    6.60
  -5   6  -4    2.00    6.60
   6   6   4  462.25   36.50
  -6   6  -4  526.85   43.00
   6   6   4  436.86   36.00
   7  -6   4  119.79   19.00
   7   6   4  109.49   12.00
   7   6   4  132.29   11.60
  -7   6  -4  133.89   19.80
   8  -6   4  126.59   20.90
  -8   6  -4  177.78   23.20
   9  -6   4   33.50   13.70
  -9   6  -4   41.00   18.20
  10  -6   4   56.39   17.40
 -10   6  -4   75.19   20.90
  11  -6   4   32.80   19.00
 -11   6  -4   48.90   20.00
  12  -6   4   64.39   22.30
 -12   6  -4   55.09   28.90
  12  -7  -4  -13.40   18.60
 -12   7   4   23.40   21.00
  11  -7  -4   11.90   16.20
 -11   7   4   -0.30   16.10
  10  -7  -4    5.60   12.30
 -10   7   4    1.40   13.10
  -9   7   4   72.19   15.50
   8  -7  -4   45.00   12.60
  -8   7   4   49.90   13.40
   7  -7  -4   38.00   11.50
  -7   7   4   25.60    9.60
   6  -7  -4   -1.10    6.70
  -6  -7   4    4.40    2.40
  -6   7   4    2.10    6.30
   5  -7  -4  194.28   20.30
  -5  -7   4  144.79   14.40
  -5   7   4  177.38   19.40
   4  -7  -4   -3.30    5.30
  -4  -7   4   -2.10    3.20
  -4   7   4    2.50    6.00
   4   7  -4    6.00    4.00
   3  -7  -4  636.64   54.79
  -3  -7   4  681.53   52.89
  -3   7   4  680.43   57.49
   3   7  -4  726.33   53.69
   2  -7  -4  244.28   22.70
  -2  -7   4  226.68   21.20
  -2   7   4  219.38   22.00
   2   7  -4  214.28   21.00
   1  -7  -4 1875.81  134.99
  -1  -7   4 1828.12  134.39
  -1   7   4 1967.00  135.29
   1   7  -4 1599.84  134.19
   0  -7  -4  113.79   13.30
   0  -7   4  120.19   14.00
   0   7   4  113.69   13.40
   0   7  -4  118.19   15.80
   1  -7   4    8.30    4.70
  -1  -7  -4    4.50    4.20
   1   7   4    7.90    4.40
  -1   7  -4    5.80    5.40
  -2  -7  -4  144.29   14.40
   2  -7   4  108.69   15.90
   2   7   4  125.39   13.60
  -2   7  -4  120.59   16.70
   3  -7   4   77.59   13.00
  -3  -7  -4   70.19   10.40
   3   7   4   68.19   10.10
  -4  -7  -4   56.69    9.40
   4  -7   4   91.89   15.10
  -4   7  -4   83.29   14.50
   4   7   4   71.29   10.10
   5  -7   4   12.30    7.60
  -5  -7  -4   -2.20    3.70
  -5   7  -4   17.30    8.30
   6  -7   4   55.09   13.40
   6   7   4   40.50    7.00
  -6   7  -4   47.70   12.20
   7  -7   4   39.90   13.70
   7   7   4   12.10    4.20
  -7   7  -4   13.40   10.80
   7   7   4   25.40    5.40
   8  -7   4  173.18   24.00
  -8   7  -4  136.49   23.80
   9  -7   4   13.80   13.90
  -9   7  -4   39.30   15.50
  10  -7   4   19.50   15.90
 -10   7  -4  -19.70   15.90
  11  -7   4   40.60   21.20
 -11   7  -4   36.10   21.20
  12  -8  -4   38.20   22.50
 -12   8   4   50.49   24.40
  11  -8  -4   23.90   18.10
 -11   8   4   19.80   19.10
  10  -8  -4   48.70   17.90
 -10   8   4   98.59   20.30
   9  -8  -4    7.60   12.00
  -9   8   4    9.90   12.90
   8  -8  -4   -2.70    9.50
  -8   8   4    6.00   10.20
  -7   8   4  215.38   25.60
   6  -8  -4   70.29   13.60
  -6  -8   4   49.90    6.60
  -6  -8   4   53.19    6.80
  -6   8   4   34.50   10.60
   5  -8  -4  360.16   30.80
  -5  -8   4  262.67   25.70
  -5   8   4  286.87   28.60
   5   8  -4  298.17   25.20
  -4  -8   4  154.48   15.20
   4  -8  -4  135.39   19.40
  -4   8   4  169.68   18.70
   4   8  -4  136.99   15.40
  -3  -8   4  636.84   52.89
   3  -8  -4  592.04   54.69
  -3   8   4  705.43   55.59
   3   8  -4  785.92   54.69
  -2  -8   4   12.30    5.50
   2  -8  -4    8.10    5.70
   2   8  -4    5.40    5.10
  -2   8   4   20.20    6.80
   1  -8  -4    3.70    5.20
  -1  -8   4    7.40    5.50
   1   8  -4    4.60    5.70
  -1   8   4    6.50    5.10
   0  -8   4  539.35   43.80
   0  -8  -4  496.45   43.10
   0   8   4  510.95   43.20
   0   8  -4  548.55   44.40
  -1  -8  -4   15.30    6.30
   1  -8   4   21.20    7.10
  -1   8  -4   -4.00    5.40
   1   8   4    7.10    5.00
  -2  -8  -4  229.18   23.10
   2  -8   4  286.07   25.80
  -2   8  -4  282.37   26.10
   2   8   4  220.78   22.50
   3  -8   4  514.65   42.40
  -3  -8  -4  426.06   38.40
   3   8   4  535.85   39.10
  -3   8  -4  405.76   41.00
   4  -8   4  908.61   77.39
   4   8   4 1026.30   74.19
  -5  -8  -4  227.78   19.10
   5  -8   4  189.08   22.60
   5   8   4  170.88   18.00
  -5   8  -4  167.88   24.20
  -6  -8  -4   19.00    6.20
   6  -8   4   37.80   11.80
  -6   8  -4   57.39   13.20
   6   8   4   34.70    6.40
  -7   8  -4   79.59   17.60
   7   8   4  103.09   10.80
   8  -8   4   10.80   11.30
  -8   8  -4    5.10   12.20
   9  -8   4   54.59   17.50
  -9   8  -4   48.20   17.60
  10  -8   4  -17.60   16.40
 -10   8  -4   40.30   21.10
  11  -8   4   11.20   21.30
 -11   8  -4   45.00   24.00
  11  -9  -4   -8.90   19.60
 -11   9   4   24.60   20.40
  10  -9  -4   -0.40   18.20
 -10   9   4    5.70   16.20
   9  -9  -4   88.99   19.80
  -9   9   4   62.99   18.10
  -8   9   4   -3.50   11.30
   7  -9  -4  260.27   29.30
  -7   9   4  238.38   30.30
   6  -9  -4  248.88   27.30
  -6  -9   4  228.08   19.60
  -6   9   4  200.28   25.30
   5  -9  -4   46.30   11.80
  -5  -9   4   36.10    7.20
  -5   9   4   37.10   10.60
   5   9  -4   58.59    9.10
  -4  -9   4   28.90    8.20
   4  -9  -4   20.10    9.10
  -4   9   4   43.40   10.50
   4   9  -4   29.40    7.60
  -3  -9   4   32.70    8.00
   3  -9  -4   27.50    9.70
   3   9  -4   44.30    9.40
  -3   9   4   41.00   10.30
   2  -9  -4  159.38   20.30
  -2  -9   4  166.08   17.00
  -2   9   4  138.49   17.50
   2   9  -4  137.49   17.20
   1  -9  -4    1.50    4.90
  -1  -9   4    6.20    5.80
   1   9  -4    1.50    5.30
  -1   9   4   -1.80    5.80
   0  -9  -4   33.50    8.80
   0  -9   4   39.90    9.60
   0   9  -4   19.40    7.10
   0   9   4   37.60    8.60
  -1  -9  -4    4.30    5.40
   1  -9   4    0.50    6.30
   1   9   4   -4.30    4.70
  -1   9  -4   -4.70    5.90
  -2  -9  -4  636.44   48.00
   2  -9   4  519.15   48.60
  -2   9  -4  574.14   49.80
   2   9   4  581.74   47.30
  -3  -9  -4  712.53   55.79
   3  -9   4  680.03   58.19
  -3   9  -4  751.92   59.59
   3   9   4  655.93   57.59
   4  -9   4    0.60    7.80
  -4  -9  -4   13.20    6.00
  -4   9  -4   -1.40    7.10
   4   9   4    6.50    5.70
  -5  -9  -4  235.48   23.50
   5  -9   4  256.07   28.60
   5   9   4  269.17   23.30
   6  -9   4    6.40    9.20
  -6  -9  -4   -4.70    4.90
  -6   9  -4   12.90   10.20
   6   9   4   -3.50    4.40
   7  -9   4   49.20   14.90
  -7   9  -4   45.60   15.60
   7   9   4   57.49    8.40
  -8   9  -4   20.60   14.10
   9  -9   4   12.10   15.90
  -9   9  -4    7.90   17.30
  10  -9   4   69.79   23.40
 -10   9  -4   65.19   23.60
  11  -9   4   -8.10   23.50
 -11   9  -4   36.60   25.50
  11 -10  -4  -20.20   21.60
 -11  10   4   17.80   22.20
  10 -10  -4   23.80   18.80
 -10  10   4   44.70   19.70
   9 -10  -4   20.60   15.80
  -9  10   4   35.90   16.50
   8 -10  -4  115.99   20.90
  -8  10   4  120.89   22.60
   7 -10  -4  100.69   19.10
  -7 -10   4  101.99   10.30
  -7 -10   4  108.49   10.50
  -7  10   4  120.39   20.90
   6 -10  -4   36.30   13.30
  -6 -10   4   48.90    8.00
   6  10  -4   42.60    8.10
  -6  10   4   28.60   11.60
   5 -10  -4   -9.50    7.40
  -5 -10   4    4.80    5.20
   5  10  -4   -1.50    5.70
  -5  10   4    7.60    8.10
   4 -10  -4    5.50    7.80
  -4 -10   4   23.10    7.20
  -4  10   4   31.80   10.10
   4  10  -4   17.20    7.10
   3 -10  -4    3.90    7.90
  -3 -10   4   13.60    8.00
   3  10  -4    6.30    6.80
  -3  10   4    2.80    6.20
   2 -10  -4    6.00    7.60
  -2 -10   4    3.60    6.40
  -2  10   4    6.50    6.80
   2  10  -4    4.70    6.70
   1 -10  -4  178.48   20.30
  -1 -10   4  146.89   20.00
  -1  10   4  171.98   19.60
   1  10  -4  158.08   19.20
   0 -10   4   18.50    8.20
   0 -10  -4   16.40    7.10
   0  10  -4   21.90    9.40
   0  10   4   23.30    7.70
   1 -10   4  393.76   35.20
  -1 -10  -4  374.16   34.20
   1  10   4  350.96   33.60
  -1  10  -4  395.96   35.90
  -2 -10  -4   60.09   11.10
   2 -10   4   42.70   10.90
  -2  10  -4   18.50    9.80
   3 -10   4  128.99   20.80
  -3 -10  -4  148.69   18.10
   3  10   4  169.68   18.10
  -3  10  -4  175.58   23.90
   4 -10   4   16.70   10.40
  -4 -10  -4   20.60    7.60
   4  10   4   35.50    8.40
  -4  10  -4   20.70   11.00
  -5 -10  -4   17.70    7.00
   5 -10   4    2.40    9.20
   5  10   4    7.90    6.40
  -5  10  -4    9.40   10.00
   6 -10   4   19.70   12.00
  -6 -10  -4   12.90    6.20
   6  10   4   12.70    6.10
  -6  10  -4   25.30   14.30
   7 -10   4    4.90   12.60
  -7 -10  -4   -3.20    5.40
  -7  10  -4    0.10   12.50
   7  10   4    1.80    5.30
   8 -10   4    5.90   14.50
  -8  10  -4   10.90   13.90
   8  10   4   10.70    3.20
   8  10   4    4.10    3.10
   9 -10   4   48.70   22.30
  -9  10  -4   48.90   20.70
  10 -10   4   19.20   21.60
 -10  10  -4   -5.60   20.70
  10 -11  -4   -3.20   20.00
 -10  11   4    0.90   19.10
  -9  11   4  -26.20   15.90
   8 -11  -4   13.50   14.70
  -8  11   4   17.20   14.20
   7 -11  -4   29.70   13.40
  -7 -11   4   23.60    6.20
  -7 -11   4   26.80    5.90
  -7  11   4    9.10   12.60
   6 -11  -4  243.18   29.70
  -6 -11   4  252.17   22.60
   6  11  -4  234.08   23.20
  -6  11   4  238.18   29.30
  -5 -11   4   80.89   12.30
   5 -11  -4   55.49   15.20
  -5  11   4   87.89   17.50
   5  11  -4   88.09   14.10
  -4 -11   4   14.50    7.10
   4 -11  -4    3.40    8.60
  -4  11   4    2.20    9.00
   4  11  -4    9.30    6.50
  -3 -11   4  387.86   34.60
   3 -11  -4  400.66   37.70
   3  11  -4  363.56   35.10
  -3  11   4  395.56   37.30
   2 -11  -4   24.30   11.40
  -2 -11   4   30.50   10.70
  -2  11   4   19.00    7.60
   2  11  -4   34.10    9.60
   1 -11  -4  275.97   28.20
  -1 -11   4  281.67   27.70
  -1  11   4  288.37   28.30
   1  11  -4  251.77   27.90
   0 -11  -4   13.40    7.80
   0 -11   4    6.60    7.70
   0  11   4    0.90    6.40
   0  11  -4    4.00    7.60
  -1 -11  -4   12.90    7.70
   1 -11   4    8.10    8.30
  -1  11  -4  -14.60    7.10
   1  11   4    2.80    7.70
   2 -11   4  206.18   22.80
  -2 -11  -4  156.88   20.60
   2  11   4  150.48   20.20
  -2  11  -4  138.29   22.40
  -3 -11  -4  166.48   20.40
   3 -11   4  124.29   21.10
   3  11   4  157.38   18.80
  -3  11  -4  154.78   23.30
   4 -11   4  260.17   29.20
  -4 -11  -4  262.27   25.90
  -4  11  -4  253.67   29.90
   4  11   4  242.38   24.90
  -5 -11  -4    2.80    6.70
   5 -11   4    0.30    9.80
  -5  11  -4   -1.00   11.00
   5  11   4    1.90    6.60
   6 -11   4  -13.90   11.20
  -6 -11  -4   11.50    7.10
  -6  11  -4    9.90   13.40
   6  11   4   12.40    6.80
  -7 -11  -4   15.30    6.90
   7 -11   4   27.30   15.20
   7  11   4   11.40    6.80
  -7  11  -4   17.40   14.60
   8 -11   4   56.49   18.80
   8  11   4   95.09   10.40
   8  11   4   89.59   10.30
  -8  11  -4  113.69   24.10
   9 -11   4   -2.60   19.20
  -9  11  -4   58.39   21.70
  10 -11   4   51.39   23.50
 -10  11  -4   30.60   24.30
 -10  12   4   13.10   21.40
   9 -12  -4  -12.90   18.10
  -9  12   4  -14.20   18.30
   8 -12  -4   27.90   16.70
  -8  12   4   19.90   16.10
  -7 -12   4   11.10    6.20
  -7  12   4    7.60   13.50
  -6 -12   4   52.89   10.50
   6 -12  -4   69.79   17.50
   6  12  -4   83.09   13.00
  -6  12   4   62.69   17.40
  -5 -12   4   21.20    8.40
   5 -12  -4   42.50   14.60
  -5  12   4   42.40   14.50
   5  12  -4   51.39   11.60
   4 -12  -4  327.77   35.30
  -4 -12   4  253.17   29.60
   4  12  -4  420.86   33.50
  -4  12   4  360.96   35.10
  -3 -12   4    0.50    7.30
   3 -12  -4   -0.20    9.30
  -3  12   4   -1.20    8.50
   3  12  -4   10.40    8.20
   2 -12  -4   86.19   17.20
  -2 -12   4   87.89   15.70
   2  12  -4   94.39   16.70
  -2  12   4   79.29   16.40
  -1 -12   4  244.18   26.10
   1 -12  -4  226.28   26.60
   1  12  -4  231.48   27.30
  -1  12   4  269.17   27.40
   0 -12   4  111.09   18.50
   0 -12  -4  163.78   21.60
   0  12   4  146.29   23.20
   0  12  -4   96.79   18.90
   1 -12   4  113.49   18.60
  -1 -12  -4  129.09   18.70
   1  12   4  111.79   17.70
  -1  12  -4   87.69   18.10
  -2 -12  -4  270.17   24.90
   2 -12   4  208.28   25.10
  -2  12  -4  165.48   25.80
   2  12   4  168.08   21.50
   3 -12   4    3.30    9.60
  -3 -12  -4    9.60    8.10
  -3  12  -4    7.30   10.60
   3  12   4    4.60    7.10
   4 -12   4   16.80   11.20
  -4 -12  -4    7.00    7.70
  -4  12  -4   32.40   11.90
   4  12   4   10.70    8.30
   5 -12   4  -14.50   11.50
  -5  12  -4   10.00   12.30
   5  12   4  -10.90    6.70
   6 -12   4   -2.50   13.80
  -6 -12  -4   -1.70    8.00
  -6  12  -4   11.60   14.00
   6  12   4   -1.00    7.00
   7 -12   4   -6.20   14.40
  -7 -12  -4    2.90    7.80
  -7  12  -4    3.70   14.80
   7  12   4    5.30    7.70
   8 -12   4  115.59   24.90
  -8  12  -4   74.39   22.10
   8  12   4   96.29   11.40
   9 -12   4   -3.10   21.20
  -9  12  -4  -16.00   20.90
  10 -13  -4   -4.60   24.70
 -10  13   4   26.40   25.40
   9 -13  -4   15.20   21.30
  -9  13   4   -2.60   20.50
  -8 -13   4   21.70    4.00
  -8  13   4   35.10   19.50
   7 -13  -4   80.69   21.20
  -7 -13   4   69.29   11.50
   7  13  -4   70.49   11.80
  -7  13   4   77.39   20.90
   6 -13  -4   79.99   20.10
  -6 -13   4   91.69   14.10
   6  13  -4   54.09   17.90
  -6  13   4   75.49   19.60
   5 -13  -4   -7.70   11.70
  -5  13   4  -14.00   12.20
   5  13  -4    8.40    9.10
   4 -13  -4   10.80   11.80
  -4 -13   4   -0.50    8.30
  -4  13   4   22.60   13.00
   4  13  -4   20.60    9.90
   3 -13  -4  240.58   29.40
  -3 -13   4  278.17   27.30
   3  13  -4  245.78   28.00
  -3  13   4  234.48   28.30
  -2 -13   4   16.10    9.70
   2 -13  -4   15.20   11.20
  -2  13   4   14.80   10.60
   2  13  -4   19.80   10.10
  -1 -13   4  141.09   19.80
   1 -13  -4  104.49   18.70
   1  13  -4  102.79   18.50
   0 -13   4  240.18   29.10
   0 -13  -4  193.18   26.80
   0  13  -4  213.08   28.50
   0  13   4  250.67   26.30
  -1 -13  -4   55.49   14.20
   1 -13   4   55.59   15.20
   1  13   4   68.09   13.60
   2 -13   4   85.19   17.70
  -2 -13  -4  107.39   17.70
   2  13   4   77.69   15.00
  -2  13  -4  101.89   19.80
   3 -13   4   -2.80   11.40
  -3 -13  -4    2.00    8.70
  -3  13  -4   -9.10   12.20
   3  13   4  -10.50    7.80
   4 -13   4   26.00   14.40
  -4  13  -4   27.20   15.40
   4  13   4   21.60    9.90
   5 -13   4   28.30   15.80
  -5  13  -4   21.20   13.20
   5  13   4    6.90    8.70
   6 -13   4   85.79   23.30
  -6 -13  -4  125.79   17.80
   6  13   4  110.99   15.90
  -6  13  -4  104.99   24.30
   7 -13   4   19.50   19.10
  -7 -13  -4   18.00    9.60
  -7  13  -4   28.50   16.60
   7  13   4   33.10    9.50
   8 -13   4   -2.10   20.10
  -8  13  -4    1.60   21.00
   9 -13   4   -0.30   25.00
  -9  13  -4   -8.50   24.10
   9 -14  -4    7.90   24.10
  -9  14   4    6.10   24.20
  -8 -14   4   60.39    9.30
  -8 -14   4   68.09    9.50
   8 -14  -4   57.39   23.00
  -8  14   4   87.69   25.00
   7 -14  -4   47.10   20.90
  -7 -14   4   42.20   10.80
  -7  14   4   47.10   19.20
   7  14  -4   26.00   10.50
  -6 -14   4   16.90   10.10
   6 -14  -4   39.30   18.60
   6  14  -4   34.30   11.70
  -6  14   4   56.89   18.50
   5 -14  -4  -10.90   12.90
  -5  14   4    9.30   13.30
   4 -14  -4   30.90   15.70
  -4  14   4   18.10   12.40
   4  14  -4   37.60   13.40
   3 -14  -4  162.08   25.20
  -3 -14   4  181.78   23.40
  -3  14   4  109.69   22.50
   3  14  -4  191.58   25.50
   2 -14  -4   54.19   15.20
  -2 -14   4   40.10   13.00
  -2  14   4   47.10   15.80
   2  14  -4   33.90   13.00
   1 -14  -4    3.40   10.00
  -1 -14   4    0.30   10.70
   1  14  -4    8.40   11.10
  -1  14   4   -5.60   10.50
   0 -14  -4   15.40   11.20
   0 -14   4    5.40   11.70
   0  14  -4  -10.00   10.60
   0  14   4   -4.00    9.70
  -1 -14  -4  416.96   41.40
   1 -14   4  414.36   42.10
  -1  14  -4  438.36   43.70
   1  14   4  428.06   40.50
   2 -14   4   58.29   16.30
  -2 -14  -4   63.59   14.50
   2  14   4   62.29   14.10
  -2  14  -4   20.80   14.80
  -3 -14  -4    5.10   10.00
   3 -14   4   12.50   13.20
  -3  14  -4  -15.10   11.40
   3  14   4   17.40   10.10
   4 -14   4   -2.60   13.90
   4  14   4  -14.40    9.50
  -4  14  -4   -5.10   13.10
   5 -14   4   12.90   16.20
  -5  14  -4   10.00   14.50
   5  14   4   34.50   12.20
   6 -14   4   44.20   18.90
  -6 -14  -4   35.20   11.60
   6  14   4    7.50   10.50
  -6  14  -4    8.70   17.60
   7 -14   4   20.70   19.00
  -7  14  -4    1.40   20.50
   8 -14   4   27.90   25.70
  -8  14  -4   61.79   24.70
  -9  14  -4    1.60   31.60
   9 -15  -4   26.00   31.10
  -9  15   4   23.70   28.30
   8 -15  -4   35.30   23.90
  -8 -15   4   36.60    9.60
  -8  15   4   10.70   23.30
   7 -15  -4   25.20   20.80
  -7  15   4    9.90   20.90
   6 -15  -4   50.69   20.70
  -6 -15   4   76.69   15.50
   6  15  -4  105.69   17.80
  -6  15   4  119.39   24.40
   5 -15  -4   19.10   17.40
  -5  15   4    1.80   13.60
   5  15  -4   -0.90   11.40
   4 -15  -4   -4.30   14.10
  -4  15   4  -23.20   12.20
   4  15  -4  -17.30   12.70
  -3 -15   4  170.38   26.30
  -3  15   4  116.19   23.10
   3  15  -4  159.88   23.90
  -2 -15   4  244.78   31.00
   2 -15  -4  347.17   35.30
  -2  15   4  255.77   32.40
   2  15  -4  268.87   34.50
   1 -15  -4  258.97   33.20
  -1 -15   4  248.48   30.20
   1  15  -4  209.28   31.00
  -1  15   4  255.57   32.40
   0 -15  -4   38.70   14.10
   0 -15   4    8.30   12.10
   0  15  -4   39.70   14.20
   0  15   4   30.60   13.20
   1 -15   4   11.00   12.50
  -1 -15  -4   20.20   12.00
   1  15   4   14.70   11.50
  -1  15  -4   18.80   15.10
   2 -15   4   19.00   12.50
  -2 -15  -4  -11.70   10.90
   2  15   4  -13.10   10.20
  -2  15  -4  -12.60   13.80
   3 -15   4   14.50   16.50
  -3  15  -4   15.60   16.70
   3  15   4    7.50   11.70
   4 -15   4   18.70   15.70
  -4 -15  -4   20.30   12.00
   4  15   4   14.60   11.90
  -4  15  -4   -3.70   14.60
  -5 -15  -4   20.90   11.90
   5 -15   4   33.90   17.70
  -5  15  -4  -13.10   16.80
   5  15   4    5.60   11.10
   6 -15   4   -9.20   18.70
  -6  15  -4    5.00   17.90
   7 -15   4   18.80   23.10
  -7  15  -4    8.80   22.30
   8 -15   4   13.30   27.90
  -8  15  -4   43.90   26.50
   8 -16  -4   15.10   27.50
  -8  16   4   12.90   26.70
   7 -16  -4   64.79   26.40
  -7  16   4   34.20   23.00
   6 -16  -4  -21.00   20.20
  -6  16   4   28.90   20.20
  -5 -16   4    1.10   11.90
   5 -16  -4    4.10   16.60
  -5  16   4   15.40   20.60
   4 -16  -4   11.40   16.10
  -4 -16   4   -2.50   12.00
   4  16  -4    6.30   14.20
  -4  16   4   -3.40   15.40
  -3 -16   4   -6.60   14.10
   3 -16  -4    7.80   15.50
  -3  16   4   20.00   14.50
   3  16  -4   16.80   15.60
   2 -16  -4   43.80   16.00
   2  16  -4   26.20   15.70
  -2  16   4   -9.90   13.80
   1 -16  -4   20.50   15.20
  -1 -16   4   10.40   14.40
   1  16  -4   44.20   17.10
  -1  16   4   29.80   14.70
   0 -16  -4   -4.50   12.90
   0 -16   4   12.00   12.90
   0  16  -4   -0.50   14.90
   0  16   4   11.00   13.80
  -1 -16  -4   -3.90   12.80
   1 -16   4   17.10   14.50
   1  16   4   -3.70   12.80
  -1  16  -4    6.40   15.20
   2 -16   4   78.59   20.90
   2  16   4  101.09   23.20
  -2  16  -4  119.99   25.80
   3 -16   4   24.30   18.00
  -3 -16  -4    6.60   13.00
  -3  16  -4  -18.00   16.00
   3  16   4   -6.20   11.80
  -4 -16  -4  226.68   31.00
   4 -16   4  292.27   38.40
   4  16   4  277.57   32.10
  -4  16  -4  249.08   38.70
   5 -16   4   80.59   24.50
  -5  16  -4   53.49   26.90
   6 -16   4   11.30   23.80
  -6  16  -4   -0.30   21.60
   7 -16   4   -4.80   24.10
  -7  16  -4    9.60   24.60
   8 -16   4   15.40   31.70
  -8  16  -4   46.50   31.80
   8 -17  -4    5.70   31.20
  -8  17   4   13.60   30.40
   7 -17  -4  113.59   31.30
  -7  17   4   48.10   28.70
   6 -17  -4   11.80   27.00
  -6  17   4   24.90   22.50
   5 -17  -4   16.30   21.60
  -5  17   4   41.40   20.70
   4 -17  -4   20.40   19.80
  -4  17   4   27.70   18.40
  -3 -17   4   18.90   15.40
   3 -17  -4   -1.20   15.80
   3  17  -4   -2.50   15.10
  -3  17   4    1.00   15.90
  -2 -17   4  -10.00   14.30
   2 -17  -4   -1.80   16.00
   2  17  -4  -10.50   15.20
  -2  17   4   -0.70   16.70
   1 -17  -4   -7.00   14.30
  -1  17   4  -24.80   14.10
   1  17  -4    2.90   17.50
   0 -17   4    8.70   15.20
   0 -17  -4   38.50   17.90
   0  17  -4    6.50   18.00
   0  17   4   14.70   16.20
   1 -17   4    6.80   16.30
  -1  17  -4   17.90   17.70
   2 -17   4   44.80   19.50
  -2 -17  -4   41.70   17.30
  -2  17  -4   26.40   18.50
   2  17   4   57.19   17.10
   3 -17   4   19.70   19.20
  -3 -17  -4   -1.70   15.40
   3  17   4   27.60   15.40
  -3  17  -4   -5.50   18.40
   4 -17   4   16.30   19.60
  -4  17  -4    9.30   18.90
   5 -17   4   59.89   24.10
  -5  17  -4   10.70   21.60
   6 -17   4   68.19   31.50
  -6  17  -4  -22.80   26.50
   7 -17   4   28.40   32.00
  -7  17  -4   75.49   31.00
   7 -18  -4   64.29   33.00
  -7  18   4   24.70   30.70
   6 -18  -4   13.80   25.50
  -6  18   4   -4.60   26.60
   5 -18  -4   18.70   24.60
  -5  18   4   11.70   24.50
   4 -18  -4  -15.30   21.60
  -4  18   4    5.70   19.10
   3 -18  -4   28.90   20.30
  -3  18   4   60.89   23.80
  -2 -18   4   67.49   20.50
   2 -18  -4   34.80   20.40
  -2  18   4   40.70   21.00
   2  18  -4   50.89   21.90
  -1 -18   4   18.00   17.40
  -1  18   4    2.10   17.20
   1  18  -4  -26.20   17.90
   0  18  -4    5.90   19.60
   0  18   4   26.70   18.10
  -1 -18  -4    4.30   16.90
  -1  18  -4    6.30   21.00
   1  18   4    1.10   16.50
   2 -18   4  136.39   28.80
  -2 -18  -4  122.69   25.60
   2  18   4  161.48   33.90
  -2  18  -4  167.78   31.70
   3 -18   4   54.19   23.80
  -3  18  -4   30.90   22.20
   4 -18   4  151.08   32.50
  -4  18  -4   99.39   30.70
   5 -18   4   65.39   30.50
  -5  18  -4   48.10   27.90
   6 -18   4   25.60   29.70
  -6  18  -4   35.40   29.00
   7 -18   4   47.60   40.70
   6 -19  -4   87.99   34.70
  -6  19   4   73.39   34.00
   5 -19  -4   -2.00   28.50
  -5  19   4  -15.20   25.80
   4 -19  -4   19.30   27.20
  -4  19   4  -10.40   24.80
   3 -19  -4  -16.40   24.80
  -3  19   4   26.90   24.30
   1 -19  -4   12.90   21.00
  -1 -19   4    8.90   20.60
  -1  19   4   14.80   19.20
   0 -19   4    6.30   20.50
   0 -19  -4   -4.30   20.40
   0  19   4  -23.60   18.70
   0  19  -4    1.70   21.70
   1 -19   4   18.90   22.50
  -1  19  -4   38.50   25.30
  -2  19  -4   40.90   28.10
  -3  19  -4   86.09   30.20
   4 -19   4   10.90   29.20
  -4  19  -4  -12.60   27.30
   5 -19   4   25.90   31.90
  -5  19  -4   93.49   34.50
   6 -19   4   26.80   37.60
  -6  19  -4  -15.20   34.40
   6 -20  -4   26.50   38.40
  -6  20   4   -3.20   36.30
  -5  20   4   41.50   34.20
   3 -20  -4   51.69   28.50
  -3  20   4  -11.60   25.20
   2 -20  -4   -0.60   25.90
  -2  20   4   18.80   26.00
   1 -20  -4   12.50   23.20
   1 -20   4  -27.20   25.60
   2 -20   4   32.10   27.10
  -2  20  -4   22.20   27.40
   3 -20   4   14.60   26.90
  -3  20  -4   13.50   30.60
  -4  20  -4   41.40   31.50
  -5  20  -4    5.90   37.40
   5 -21  -4    1.30   39.70
  -5  21   4   53.89   39.50
   4 -21  -4   22.50   35.10
  -4  21   4   18.10   32.90
   3 -21  -4   51.79   34.20
   3 -21   4   12.80   41.90
   4 -21   4  -13.80   35.40
  -4  21  -4   30.20   36.80
   5 -21   4  -62.39   39.50
  -5  21  -4    1.50   41.80
 -11   0   5    0.50    4.30
  10   0  -5    1.80    4.90
 -10   0   5    5.60    5.80
  -9   0   5   -2.90    5.20
   9   0  -5   -0.50    4.70
   8   0  -5    4.00    4.60
  -8   0   5   -0.90    4.40
   7   0  -5    2.00    3.90
  -7   0   5   -1.00    3.50
   6   0  -5    4.00    3.40
  -6   0   5    0.50    3.10
   5   0  -5    3.70    5.60
  -5   0   5    2.00    3.00
   4   0  -5    2.80    2.80
  -4   0   5    3.80    3.00
   3   0  -5   -1.00    2.40
  -3   0   5    1.00    2.20
  -2   0   5   -0.10    2.00
  -1   0   5   -0.20    2.30
   1   0  -5   -1.00    2.30
   0   0   5   19.20    4.10
   0   0  -5   13.10    3.50
   1   0   5    3.90    2.70
   2   0   5   -0.50    2.90
   3   0   5   -1.60    3.10
   3   0   5    1.00    2.80
   4   0   5    1.20    3.70
   4   0   5    4.40    3.70
   5   0   5   -1.70    4.10
   5   0   5   -4.40    4.20
   6   0   5   10.60    5.70
   6   0   5    1.60    5.00
   7   0   5   -5.00    5.50
   7   0   5    2.80    6.10
   8   0   5    2.00    6.40
   8   0   5  -10.00    6.50
   9   0   5    1.00    7.40
   9   0   5   -1.90    6.60
  10   0   5    4.00    8.00
  10   0   5    8.10    8.40
  11   0   5   10.90    8.60
  12   0   5   14.40    8.60
  12  -1  -5    8.60    5.10
  11  -1  -5   50.89    9.50
 -11   1   5   46.00   10.30
  10  -1  -5    2.00    6.10
   9  -1  -5   65.79   10.30
   9   1  -5   56.89    7.30
  -9   1   5   40.10    9.90
   8  -1  -5   16.60    6.20
  -8  -1   5   13.00    4.70
  -8   1   5   22.60    6.30
   8   1  -5   13.40    4.10
   7  -1  -5   10.80    5.20
  -7  -1   5    6.80    3.50
   7   1  -5    6.10    3.80
  -7   1   5   13.20    5.10
   6  -1  -5  132.69   13.80
  -6  -1   5  126.19   12.30
  -6   1   5  132.59   13.60
   6   1  -5  128.09   12.60
  -5  -1   5  294.47   24.80
   5  -1  -5  301.87   26.00
  -5   1   5  333.27   26.00
   5   1  -5  306.07   25.10
  -4  -1   5 1328.37   98.49
   4  -1  -5 1318.37   99.39
  -4   1   5 1309.07   99.09
   4   1  -5 1420.96   98.89
  -3  -1   5    1.00    2.40
   3  -1  -5    1.90    2.60
   3   1  -5    0.60    2.40
  -3   1   5    0.50    2.60
  -2  -1   5 4123.69  290.57
  -2   1   5 3965.90  290.77
  -1  -1   5 4168.58  326.37
   1  -1  -5 4892.61  327.07
  -1   1   5 4031.80  326.37
   1   1  -5 5133.69  327.37
   0  -1   5 3151.08  209.18
   0  -1  -5 3049.59  208.78
   0  -1   5 2562.54  208.18
   0   1   5 2789.22  208.48
   1  -1   5   71.79   10.20
  -1  -1  -5   81.39    9.60
   1  -1   5   74.19    9.50
   1   1   5  113.29   10.30
   2  -1   5    1.80    3.00
  -2  -1  -5    3.70    3.30
   2   1   5    0.80    2.80
   3   1   5  193.58   18.20
   3   1   5  192.08   18.00
  -3   1  -5  213.28   19.20
   4  -1   5  611.84   49.20
   4   1   5  657.93   48.70
  -4   1  -5  624.34   49.10
   4   1   5  575.74   47.90
   5  -1   5    6.10    5.60
   5   1   5   15.80    5.10
  -5   1  -5    8.00    5.00
   5   1   5   13.10    7.60
   6  -1   5    8.50    7.20
   6   1   5   18.70    6.10
   6   1   5   18.30    6.20
   7  -1   5   15.60    6.80
   7   1   5    8.30    6.00
   7   1   5   11.90    6.20
   8  -1   5   50.99   11.90
   8  -1   5   35.40    9.90
   8   1   5   49.10    9.50
   8   1   5   55.49   10.20
   9  -1   5   12.40    8.30
   9  -1   5   23.40   11.70
   9   1   5    3.70    6.60
   9   1   5   -9.90    6.50
  10  -1   5    4.80   10.00
  10   1   5    8.00    7.00
  10   1   5   -1.40    7.10
  11  -1   5   22.60   10.80
  11   1   5   22.60    7.70
  12  -2  -5    6.20    9.00
 -12   2   5   10.00   10.70
  11  -2  -5   -5.40    8.00
 -11   2   5    2.10    9.50
  10  -2  -5   -6.20    7.40
 -10   2   5    2.70    8.70
   9  -2  -5  547.15   45.80
  -9   2   5  578.94   46.60
  -8  -2   5   19.90    3.90
  -8  -2   5   22.20    3.80
   8  -2  -5   10.80    6.40
  -8   2   5   26.50    7.80
   7  -2  -5    0.50    5.00
  -7  -2   5    5.60    2.90
  -7   2   5    1.40    4.80
   6  -2  -5  125.79   15.70
  -6  -2   5  136.89   12.60
   6   2  -5  147.79   13.10
  -6   2   5  149.59   15.00
   5  -2  -5  943.61   67.29
  -5  -2   5  866.31   64.89
   5   2  -5  845.92   65.09
  -5   2   5  858.01   66.49
   4  -2  -5    2.00    3.50
  -4  -2   5    0.80    2.30
   4   2  -5    6.00    3.00
  -4   2   5   -1.60    3.00
  -3  -2   5  106.89   10.00
  -3   2   5   82.39   11.30
   2  -2  -5  403.86   30.10
  -2  -2   5  370.86   29.20
  -2  -2   5  367.86   29.00
  -2   2   5  309.27   29.10
  -1  -2   5  648.94   46.90
   1  -2  -5  537.95   46.40
  -1  -2   5  662.23   48.80
  -1   2   5  588.64   46.70
   0  -2   5  114.09   11.60
   0  -2  -5   96.99   10.60
   0   2   5   96.49   10.60
  -1  -2  -5 2595.64  177.78
   1  -2   5 2555.04  178.48
  -1   2  -5 2442.56  178.18
   1   2   5 2203.18  177.18
   2  -2   5   36.60    7.50
  -2  -2  -5   44.40    7.20
   2   2   5   35.00    6.10
  -2   2  -5   47.20    7.90
  -3   2  -5 1004.30   77.69
   3   2   5 1033.00   76.49
   4   2   5  828.02   59.49
   4   2   5  709.53   59.19
  -4   2  -5  790.62   60.89
   5  -2   5   -0.50    4.90
   5   2   5    1.60    4.10
   5   2   5   -1.40    4.20
  -5   2  -5   -0.40    5.10
   6  -2   5    2.90    6.00
   6   2   5    9.50    5.10
   6   2   5    8.50    5.00
  -6   2  -5    5.90    6.50
   7  -2   5    0.60    6.50
   7   2   5    4.80    4.80
  -7   2  -5    8.40    7.40
   7   2   5    3.00    5.20
   8  -2   5   43.40   11.30
   8   2   5   51.59    9.20
   8   2   5   54.99    9.50
  -8   2  -5   35.60   10.90
   9  -2   5  387.76   38.40
   9   2   5  449.46   35.70
   9   2   5  454.25   35.40
  10  -2   5   15.20   10.00
  10  -2   5    7.50   11.60
  10   2   5   16.30    6.20
  10   2   5    4.80    6.30
  11  -2   5   73.09   16.00
  12  -2   5  -10.50   13.50
  13  -3  -5   22.60   12.70
 -13   3   5   15.10   13.90
  12  -3  -5   13.00   11.80
 -12   3   5   16.80   13.10
  11  -3  -5   16.30   10.10
 -11   3   5   13.20   12.50
  10  -3  -5  113.39   16.70
 -10   3   5  132.69   18.70
   9  -3  -5   14.40    7.60
  -9   3   5   11.20    8.50
   8  -3  -5   16.50    7.50
  -8   3   5   22.80    8.10
   7  -3  -5  873.11   67.39
  -7  -3   5  848.02   62.79
  -7  -3   5  869.51   62.59
  -6  -3   5   49.30    6.00
   6  -3  -5   41.90    8.30
  -6  -3   5   47.20    6.20
  -6   3   5   49.30    8.90
  -5  -3   5 1204.48   83.39
   5  -3  -5 1113.89   86.09
  -5  -3   5 1082.19   83.39
  -5   3   5 1142.79   85.79
  -4  -3   5  204.48   17.40
  -4  -3   5  200.18   17.50
  -4   3   5  208.08   19.20
   3  -3  -5    0.90    2.80
  -3  -3   5    0.20    2.60
  -3  -3   5   -1.10    2.30
  -3   3   5    4.60    3.20
   2  -3  -5  339.57   27.20
  -2  -3   5  317.57   26.20
  -2  -3   5  322.17   26.40
  -2   3   5  297.57   26.70
  -1  -3   5 1073.49   79.09
   1  -3  -5 1142.29   79.49
   1   3  -5  893.81   78.39
  -1   3   5 1129.09   79.49
   0  -3   5 1017.90   72.69
   0  -3  -5 1021.10   72.59
   0   3   5  905.71   71.89
   0   3  -5  878.91   73.89
  -1  -3  -5  450.65   36.80
   1  -3   5  413.76   37.20
  -1   3  -5  513.25   38.20
   1   3   5  477.75   36.90
  -2  -3  -5   83.99    9.60
   2  -3   5   76.19   11.10
   2   3   5   75.59    9.40
  -2   3  -5   79.69   11.90
   3  -3   5  282.67   24.20
  -3  -3  -5  243.18   21.90
   3   3   5  232.38   21.70
  -3   3  -5  269.27   24.00
   4   3   5  515.95   42.40
  -4   3  -5  576.34   45.20
   5  -3   5  746.73   57.79
  -5   3  -5  682.83   57.39
   5   3   5  705.33   55.29
   5   3   5  721.53   54.89
   6  -3   5   -0.30    6.20
   6   3   5    5.20    4.60
   6   3   5   -4.10    3.80
  -6   3  -5    2.50    6.60
   7   3   5   67.39    9.90
  -7   3  -5   83.19   14.40
   7   3   5   67.09   10.20
   8  -3   5  218.68   24.30
  -8   3  -5  256.77   26.20
   8   3   5  215.58   19.90
   8   3   5  197.38   19.90
   9  -3   5   19.60    9.70
   9   3   5    8.50    5.10
   9   3   5   13.90    5.50
  -9   3  -5   20.20   11.60
  10  -3   5   -8.00   10.30
  10   3   5    3.40    3.50
  10   3   5    1.40    4.40
  11  -3   5   31.20   14.60
  12  -3   5   37.80   16.60
  13  -3   5    1.70   18.40
 -13   4   5   14.90   21.30
  12  -4  -5    3.00   13.70
 -12   4   5  -37.60   13.90
  11  -4  -5   -0.50   11.50
 -11   4   5   -5.50   12.80
  10  -4  -5   20.80   10.50
 -10   4   5   10.00   10.60
   9  -4  -5   43.60   11.50
  -9   4   5   54.79   12.80
   8  -4  -5  353.36   32.90
  -8   4   5  359.96   32.90
   7  -4  -5   37.70    9.00
  -7   4   5   41.80    9.50
  -6  -4   5    6.60    2.90
   6  -4  -5    4.00    5.60
  -6  -4   5    4.80    2.60
  -6   4   5   11.70    6.00
   5  -4  -5   51.69    9.30
  -5  -4   5   43.30    5.90
  -5  -4   5   37.70    5.80
  -5   4   5   50.99    9.20
  -4  -4   5 1247.28   96.29
  -4   4   5 1389.66   98.69
  -3  -4   5    0.30    2.70
  -3  -4   5    3.50    2.80
   3  -4  -5    4.10    4.40
  -3   4   5    7.70    4.50
  -2  -4   5   15.30    4.80
   2  -4  -5   15.40    5.10
   2   4  -5   18.10    4.80
  -2   4   5   26.40    5.90
  -1  -4   5  357.66   28.80
   1  -4  -5  324.37   28.70
  -1   4   5  385.06   29.60
   1   4  -5  306.97   28.40
   0  -4   5   14.50    4.90
   0  -4  -5    3.30    3.30
   0   4  -5    8.70    3.90
   0   4   5   15.30    4.60
   1  -4   5   44.50    8.30
  -1  -4  -5   60.39    8.40
   1   4   5   29.40    6.30
  -1   4  -5   45.60    8.40
   2  -4   5   61.09   10.60
  -2  -4  -5   82.19   10.40
   2   4   5   55.79    8.60
  -2   4  -5   79.89   11.50
  -3  -4  -5  341.17   27.90
   3  -4   5  294.07   29.20
   3   4   5  346.17   27.80
  -3   4  -5  331.47   29.80
  -4  -4  -5  889.51   65.69
  -4   4  -5  819.92   67.89
   4   4   5  870.11   65.49
   5   4   5  229.48   21.40
   5   4   5  237.08   21.10
  -5   4  -5  253.97   24.90
   6  -4   5   75.39   14.20
   6   4   5   96.29   11.40
  -6   4  -5  103.69   16.30
   6   4   5  107.19   12.10
   7  -4   5   43.90   11.40
  -7   4  -5   71.99   14.20
   7   4   5   66.39    8.90
   7   4   5   51.89    9.10
   8  -4   5   58.79   13.10
  -8   4  -5   85.39   19.20
   8   4   5   85.89   10.20
   9  -4   5   28.10   12.20
  -9   4  -5   38.90   13.20
   9   4   5   25.10    4.80
   9   4   5   20.60    5.20
  10  -4   5    7.10   12.50
 -10   4  -5   11.00   14.10
  11  -4   5    5.40   15.70
  12  -4   5   53.39   19.60
  13  -5  -5   18.40   18.70
 -13   5   5   -3.90   19.70
  12  -5  -5   12.00   15.40
 -12   5   5  -14.00   16.30
  11  -5  -5   -1.40   12.50
 -11   5   5  -13.40   13.50
  10  -5  -5   71.49   14.90
 -10   5   5   69.39   16.30
   9  -5  -5   45.90   13.50
  -9   5   5   70.29   14.10
   8  -5  -5   26.30   12.40
  -8   5   5   23.60    9.10
   7  -5  -5   -3.40    6.70
  -7   5   5   -4.70    6.00
   6  -5  -5   24.80    8.00
  -6  -5   5   19.00    3.70
  -6  -5   5   21.50    3.90
  -6   5   5   27.40    8.30
  -5  -5   5   59.39    8.60
  -5  -5   5   87.79    8.60
  -5   5   5   80.69   12.10
  -4  -5   5    1.40    3.10
   4  -5  -5   -4.70    4.00
  -4  -5   5    1.30    3.10
  -4   5   5    0.20    4.30
   3  -5  -5   34.00    7.70
  -3  -5   5   21.80    5.30
  -3   5   5   34.20    7.40
   3   5  -5   31.90    6.20
  -2  -5   5  151.18   14.80
   2  -5  -5  129.39   15.00
  -2   5   5  142.79   15.40
   2   5  -5  153.88   14.80
   1  -5  -5  700.53   53.89
  -1  -5   5  630.44   50.79
   1   5  -5  590.14   50.69
  -1   5   5  691.23   51.39
   0  -5   5  351.86   29.00
   0  -5  -5  388.96   29.10
   0   5  -5  263.97   27.90
   0   5   5  327.47   28.20
   1  -5   5    2.00    4.50
  -1  -5  -5   -1.90    3.40
  -1   5  -5    5.50    4.60
   1   5   5    6.40    3.50
   2  -5   5   90.09   13.20
  -2  -5  -5   89.79   10.50
   2   5   5   67.19   10.30
  -2   5  -5   88.29   13.40
  -3  -5  -5  404.26   33.70
   3  -5   5  438.36   36.30
   3   5   5  412.26   33.70
  -3   5  -5  393.96   36.00
  -4  -5  -5  416.36   34.10
   4  -5   5  438.46   37.30
  -4   5  -5  411.96   37.20
   4   5   5  410.86   34.00
  -5   5  -5   52.39   12.10
   5   5   5   79.29   11.50
   6  -5   5   10.70    8.20
   6   5   5    8.50    4.60
   6   5   5    7.40    5.00
  -6   5  -5   18.70    9.30
   7  -5   5  221.68   26.50
   7   5   5  256.17   22.30
   7   5   5  259.47   21.60
  -7   5  -5  228.08   27.30
   8  -5   5   17.40   10.70
   8   5   5    5.60    4.70
   8   5   5    4.10    4.30
  -8   5  -5    3.40   10.30
   9  -5   5  196.78   24.50
  -9   5  -5  150.88   25.30
  10  -5   5    1.20   13.40
 -10   5  -5   -4.80   15.90
  11  -5   5   29.20   16.70
 -11   5  -5   76.29   21.20
  12  -5   5   77.49   22.90
  13  -6  -5    6.80   22.20
  12  -6  -5   44.70   18.00
  11  -6  -5   23.30   15.30
 -11   6   5   23.50   16.20
  10  -6  -5  174.08   23.80
 -10   6   5  137.09   23.70
   9  -6  -5    3.50    9.30
  -9   6   5   27.90   11.90
   8  -6  -5   99.49   17.30
  -8   6   5  134.89   18.80
   7  -6  -5   51.99   12.20
  -7   6   5   62.69   12.20
  -6  -6   5   49.90    6.10
  -6  -6   5   38.90    5.90
  -6   6   5   55.09   10.50
  -5  -6   5   41.10    6.30
  -5  -6   5   32.30    5.90
   5  -6  -5   40.60    9.70
  -5   6   5   45.80    9.90
  -4  -6   5  238.18   22.40
   4  -6  -5  289.27   26.10
  -4   6   5  283.67   25.60
   3  -6  -5   32.90    8.50
  -3  -6   5   41.00    7.50
  -3   6   5   36.40    8.60
   3   6  -5   50.99    8.40
   2  -6  -5   37.00    8.40
  -2  -6   5   34.00    7.10
   2   6  -5   23.30    6.10
  -2   6   5   36.10    8.00
   1  -6  -5   68.89   10.50
  -1  -6   5   64.19   10.30
  -1   6   5   63.89   10.40
   1   6  -5   41.20    8.70
   0  -6  -5  973.80   70.89
   0  -6   5  871.11   70.79
   0   6  -5  910.01   71.29
   0   6   5  914.81   70.39
   1  -6   5    4.00    5.10
  -1  -6  -5   10.20    4.60
   1   6   5    1.80    3.90
  -1   6  -5    4.10    5.40
   2  -6   5   28.50    8.70
  -2  -6  -5   38.20    7.80
  -2   6  -5   28.10    8.20
   2   6   5   32.10    6.90
   3  -6   5   26.40    8.30
  -3  -6  -5   21.60    6.10
  -3   6  -5   30.20    8.80
   3   6   5   27.00    6.10
  -4  -6  -5  294.27   23.60
   4  -6   5  234.38   25.90
   4   6   5  237.28   22.80
  -4   6  -5  266.77   26.70
   5  -6   5    6.30    7.60
  -5  -6  -5   15.00    5.60
  -5   6  -5   21.50    8.90
   5   6   5   20.80    5.70
   6   6   5    3.90    4.10
   6   6   5    7.40    5.20
  -6   6  -5   17.60    9.60
   7  -6   5    6.50    8.70
  -7   6  -5    2.80    9.20
   7   6   5    1.30    5.00
   7   6   5    1.30    4.30
   8  -6   5    3.80   10.60
   8   6   5   -1.50    4.20
   8   6   5   -2.40    3.70
  -8   6  -5   -5.90   10.70
   9  -6   5  125.49   20.30
  10  -6   5   63.39   19.00
 -10   6  -5   50.09   18.80
  11  -6   5   76.89   22.00
 -11   6  -5  113.69   26.50
  12  -6   5   25.20   22.40
  12  -7  -5  -22.90   18.70
 -12   7   5   29.10   22.50
  11  -7  -5  113.39   22.20
 -11   7   5  118.39   23.80
  10  -7  -5  153.58   23.40
 -10   7   5  123.79   22.60
   9  -7  -5   42.40   15.70
  -9   7   5   43.00   14.70
   8  -7  -5  151.88   20.70
  -8   7   5   91.39   17.30
   7  -7  -5  921.11   73.29
  -7   7   5  875.61   72.09
  -6  -7   5  952.20   68.49
  -6  -7   5  885.21   68.29
  -6   7   5  957.30   74.19
  -5  -7   5  244.28   21.70
  -5  -7   5  258.07   21.90
   5  -7  -5  230.58   25.60
  -5   7   5  283.07   26.40
  -4  -7   5  284.17   25.70
   4  -7  -5  285.07   28.60
  -4   7   5  345.97   29.10
   4   7  -5  295.87   26.00
  -3  -7   5  522.75   44.20
   3  -7  -5  563.54   46.80
  -3   7   5  539.35   46.60
   3   7  -5  600.44   45.30
   2  -7  -5   81.99   13.90
  -2  -7   5   97.19   13.60
  -2   7   5  108.39   14.70
   2   7  -5  120.19   13.70
  -1  -7   5  656.53   50.89
   1  -7  -5  618.24   51.09
   1   7  -5  534.15   50.49
  -1   7   5  730.63   51.79
   0  -7   5 1198.78   94.79
   0  -7  -5 1269.57   94.59
   0   7  -5 1290.57   95.49
   0   7   5 1228.58   94.39
  -1  -7  -5   39.60    8.40
   1  -7   5   37.30    9.50
  -1   7  -5   36.50    8.80
   1   7   5   25.00    6.90
  -2  -7  -5  159.38   17.10
   2  -7   5  162.48   19.00
  -2   7  -5  176.28   19.40
   2   7   5  165.28   16.90
  -3  -7  -5  704.83   56.69
   3  -7   5  792.62   60.99
   3   7   5  754.82   56.79
  -3   7  -5  656.53   59.19
   4  -7   5  124.69   18.80
  -4  -7  -5  147.09   15.10
  -4   7  -5  105.79   17.90
   5  -7   5   16.50    9.30
  -5  -7  -5   11.10    4.90
   5   7   5    9.30    5.20
  -5   7  -5   10.80    7.80
   6  -7   5   51.99   13.80
  -6   7  -5   55.69   14.60
   6   7   5   80.99   10.30
   7   7   5  178.48   17.30
   7   7   5  180.28   16.40
  -7   7  -5  134.09   22.30
   8  -7   5   46.40   14.00
   8   7   5   24.80    5.40
   8   7   5   36.70    6.10
  -8   7  -5   35.90   14.90
   9  -7   5   86.19   19.00
  -9   7  -5  110.49   21.50
  10  -7   5  -12.60   16.00
 -10   7  -5    7.30   18.20
  11  -7   5    6.80   20.80
 -11   7  -5    7.00   22.70
  12  -8  -5  -16.80   20.20
 -12   8   5  -16.70   23.80
  11  -8  -5   14.50   18.40
 -11   8   5   21.40   19.10
  10  -8  -5   21.80   15.40
 -10   8   5   -7.50   14.60
   9  -8  -5   64.59   17.00
  -9   8   5   69.29   16.50
   8  -8  -5   82.29   16.50
  -8   8   5   53.69   14.70
  -7  -8   5  216.98   16.00
  -7  -8   5  209.78   16.00
  -7   8   5  187.08   25.40
   6  -8  -5    4.20    8.60
  -6  -8   5    1.60    3.80
  -6  -8   5    1.30    3.60
  -6   8   5   11.30    8.00
   5  -8  -5    6.30    7.00
  -5  -8   5    8.80    4.90
  -5   8   5   -3.80    6.40
   4  -8  -5    3.00    7.10
  -4  -8   5    8.20    5.60
   4   8  -5   10.50    7.40
  -3  -8   5   94.49   13.00
   3  -8  -5   73.89   14.00
   3   8  -5   92.69   13.40
  -3   8   5   79.19   13.70
  -2  -8   5    5.20    5.70
   2  -8  -5    9.20    5.80
  -2   8   5   17.40    7.20
   2   8  -5    4.40    5.20
   1  -8  -5   11.50    6.20
  -1  -8   5    4.40    5.90
   1   8  -5    1.70    5.60
  -1   8   5    9.10    5.80
   0  -8   5    5.20    5.70
   0  -8  -5    0.50    4.40
   0   8  -5    5.10    5.90
   0   8   5    1.80    4.50
   1  -8   5   21.00    8.50
  -1  -8  -5   18.10    6.70
   1   8   5   14.20    6.00
  -1   8  -5   14.40    6.20
  -2  -8  -5   20.20    7.00
   2  -8   5   20.70    8.20
   2   8   5   10.80    5.20
  -2   8  -5   23.80    8.00
  -3  -8  -5    7.30    5.60
   3  -8   5   -0.50    6.90
   3   8   5    6.70    5.40
  -3   8  -5    7.70    6.40
   4  -8   5  155.48   22.50
  -4  -8  -5  183.48   18.70
  -4   8  -5  194.58   22.60
   4   8   5  174.48   18.00
  -5  -8  -5    7.10    5.40
   5  -8   5    0.20    7.70
  -5   8  -5    6.20    9.00
   5   8   5    5.10    4.70
   6  -8   5    3.90    9.80
  -6  -8  -5    9.70    5.90
   6   8   5   12.00    5.00
  -6   8  -5   -5.10    9.20
   7  -8   5   -1.40   10.20
   7   8   5    4.20    4.90
   7   8   5   -3.70    5.60
  -7   8  -5   -6.20   11.20
   8  -8   5    3.30   12.20
   8   8   5    1.80    3.80
  -8   8  -5    4.60   13.10
   8   8   5    1.30    4.40
   9  -8   5   -3.30   14.40
  -9   8  -5   35.30   17.00
  10  -8   5    0.00   17.20
  11  -8   5   55.49   24.40
 -11   8  -5   62.89   26.20
  11  -9  -5   28.40   20.70
 -11   9   5   30.40   21.60
  10  -9  -5   -9.40   16.40
 -10   9   5  -12.30   16.20
   9  -9  -5   64.19   18.70
  -9   9   5  106.89   21.40
  -8   9   5    2.70   11.80
  -7  -9   5  145.49   14.30
  -7  -9   5  157.38   13.30
   7  -9  -5  156.48   23.30
  -7   9   5  139.39   22.00
  -6  -9   5  133.99   14.30
  -6  -9   5  137.89   14.80
   6  -9  -5  159.28   23.10
  -6   9   5  151.58   21.50
  -5  -9   5  284.27   24.80
   5  -9  -5  269.97   29.60
   5   9  -5  278.97   25.40
  -5   9   5  278.37   31.80
  -4  -9   5  170.28   17.40
   4  -9  -5  169.08   20.70
   4   9  -5  168.08   18.50
  -4   9   5  140.89   21.10
  -3  -9   5  131.09   15.00
   3  -9  -5  100.09   16.60
   3   9  -5  106.09   16.10
  -3   9   5  110.29   16.70
   2  -9  -5  196.58   22.60
  -2  -9   5  228.08   22.00
   2   9  -5  199.28   21.80
  -2   9   5  205.18   22.60
  -1  -9   5  165.98   18.60
   1  -9  -5  157.38   18.10
  -1   9   5  155.18   17.70
   1   9  -5  118.69   18.10
   0  -9  -5  301.37   27.90
   0  -9   5  284.27   27.90
   0   9  -5  314.97   28.80
   0   9   5  244.58   26.50
   1  -9   5  350.76   34.90
  -1  -9  -5  418.56   34.70
   1   9   5  377.46   33.70
  -1   9  -5  374.66   35.60
  -2  -9  -5  266.67   24.70
   2  -9   5  254.07   26.60
   2   9   5  208.48   22.80
  -2   9  -5  257.47   26.70
   3  -9   5    8.20    7.60
  -3  -9  -5   35.10   12.40
   3   9   5   41.00    9.10
  -3   9  -5   51.89   12.70
   4  -9   5  150.38   22.00
  -4  -9  -5  151.08   16.90
  -4   9  -5  137.19   20.90
   4   9   5  141.99   16.60
   5  -9   5  131.99   20.90
  -5  -9  -5  146.89   17.00
   5   9   5  151.38   16.70
  -5   9  -5  146.49   22.30
   6  -9   5   17.60   10.70
  -6  -9  -5   30.00    8.20
   6   9   5   26.30    7.90
  -6   9  -5   40.10   12.80
   7  -9   5   31.20   13.10
  -7   9  -5   29.90   14.10
   7   9   5   36.70    7.30
   8   9   5    2.90    4.70
  -8   9  -5   10.20   15.00
   8   9   5   11.30    5.30
   9  -9   5   58.69   19.90
  -9   9  -5   34.70   17.80
  10  -9   5   -3.40   19.50
 -10   9  -5    6.20   22.20
  11  -9   5   35.60   32.70
  11 -10  -5   25.90   22.30
 -11  10   5   38.70   23.10
  10 -10  -5   35.20   19.60
 -10  10   5   -2.10   18.50
   9 -10  -5  -11.10   14.80
  -9  10   5   22.70   15.40
   8 -10  -5   -3.30   12.80
  -8  10   5   21.40   12.50
   7 -10  -5   67.29   17.80
  -7 -10   5   68.39    9.60
  -7 -10   5   60.49    8.40
  -7  10   5   39.40   14.10
  -6 -10   5    5.80    5.10
   6 -10  -5   -2.50    9.70
  -6  10   5    3.00    9.40
   5 -10  -5   11.00    9.40
  -5 -10   5    9.90    6.00
   5  10  -5    7.30    6.50
  -5  10   5   13.20    9.40
   4 -10  -5  209.38   25.90
  -4 -10   5  247.58   23.50
   4  10  -5  262.97   24.80
  -4  10   5  229.78   26.30
  -3 -10   5  371.46   37.00
   3 -10  -5  464.45   40.60
   3  10  -5  432.46   38.70
  -3  10   5  516.95   41.30
   2 -10  -5   -0.60    6.70
  -2 -10   5    9.30    7.30
   2  10  -5    4.50    7.00
  -2  10   5    8.20    7.90
  -1 -10   5   32.90    9.70
   1 -10  -5   13.60    8.20
   1  10  -5   28.80    8.70
  -1  10   5   31.20    9.40
   0 -10  -5   -1.30    5.80
   0 -10   5    5.50    7.70
   0  10  -5   -4.10    6.70
   0  10   5   -6.70    6.10
  -1 -10  -5    0.30    6.10
   1 -10   5   11.60    7.70
   1  10   5   -4.40    5.90
  -1  10  -5   -1.70    7.60
   2 -10   5   37.40   11.30
  -2 -10  -5   45.30   12.20
  -2  10  -5   51.89   13.20
   2  10   5   32.30    9.40
   3 -10   5  285.17   30.90
  -3 -10  -5  284.07   28.10
  -3  10  -5  317.07   32.00
   3  10   5  299.17   28.20
  -4 -10  -5  232.58   23.10
   4 -10   5  226.08   26.90
  -4  10  -5  214.88   28.70
   4  10   5  213.38   22.50
   5 -10   5   80.39   17.30
  -5 -10  -5  103.19   14.70
   5  10   5   83.29   13.10
  -5  10  -5   93.79   17.90
  -6 -10  -5   95.79   13.90
   6 -10   5  109.49   20.50
   6  10   5  108.99   13.90
  -6  10  -5  107.59   23.20
   7 -10   5    4.80   12.20
  -7 -10  -5    9.60    7.10
   7  10   5    0.20    5.80
  -7  10  -5    0.30   12.80
   8 -10   5   14.50   15.00
  -8  10  -5    9.30   17.00
   8  10   5    8.90    6.00
   8  10   5   13.80    5.70
  -9  10  -5   -9.00   18.30
  10 -10   5   37.90   24.50
 -10  10  -5  129.89   28.90
  11 -11  -5  -23.10   26.90
  10 -11  -5   -4.80   19.80
 -10  11   5  -14.10   20.00
   9 -11  -5    1.30   16.80
  -9  11   5   60.79   20.20
   8 -11  -5   65.19   19.30
  -8  11   5   87.99   19.30
   7 -11  -5   71.29   18.60
  -7 -11   5   74.39   10.60
  -7 -11   5   67.79    9.80
  -7  11   5   38.10   15.70
  -6 -11   5   14.10    7.00
   6 -11  -5   29.40   12.70
   6  11  -5   14.10    7.40
  -6  11   5   15.20   10.70
   5 -11  -5   24.20   10.60
  -5 -11   5   16.80    7.60
   5  11  -5    5.50    7.40
  -5  11   5   13.70    9.90
   4 -11  -5  303.67   33.30
  -4 -11   5  356.26   30.90
  -4  11   5  307.67   33.30
   4  11  -5  350.76   32.20
   3 -11  -5   51.99   13.40
  -3 -11   5   66.59   12.70
  -3  11   5   87.89   16.00
   3  11  -5   73.99   13.60
  -2 -11   5   32.20   10.10
   2 -11  -5   44.20   13.00
   2  11  -5   20.60    8.80
  -2  11   5   45.60   11.60
   1 -11  -5   14.50    9.70
  -1 -11   5   20.00    9.10
   1  11  -5   13.20    9.20
  -1  11   5   14.40    8.50
   0 -11  -5  158.98   21.10
   0 -11   5  127.49   19.60
   0  11  -5  111.39   19.40
   0  11   5  147.99   19.70
   1 -11   5   11.90    9.10
  -1 -11  -5    9.00    7.90
   1  11   5   -4.70    6.90
  -1  11  -5    3.20    9.00
   2 -11   5  237.68   28.30
  -2 -11  -5  279.67   27.30
  -2  11  -5  259.67   29.90
   2  11   5  273.27   26.50
   3 -11   5  121.79   19.70
  -3 -11  -5  169.98   19.70
   3  11   5  147.19   18.80
  -3  11  -5  108.79   19.60
   4 -11   5   31.70   12.00
  -4 -11  -5   43.10   10.50
  -4  11  -5   30.90   12.30
   4  11   5   37.40    9.80
   5 -11   5   71.79   16.90
   5  11   5   70.69   12.20
  -5  11  -5   73.19   17.50
  -6 -11  -5    6.20    7.30
   6 -11   5   -9.20   10.60
   6  11   5   -2.50    6.50
  -6  11  -5    2.10   12.30
   7 -11   5   18.50   15.00
  -7 -11  -5   20.60    9.60
   7  11   5   20.50    7.70
   8 -11   5    4.90   17.90
  -8  11  -5  -26.30   17.30
   8  11   5   -1.50    6.30
   8  11   5    2.00    6.80
   9 -11   5   19.50   20.40
  -9  11  -5   -5.00   20.00
  10 -11   5  -24.60   22.40
 -10  11  -5   20.10   24.70
 -10  12   5  -12.30   21.20
   9 -12  -5   36.10   19.90
  -9  12   5   15.30   18.80
   8 -12  -5  160.18   27.60
  -8  12   5  136.59   26.10
   7 -12  -5   42.70   17.10
  -7 -12   5   32.10    7.90
  -7 -12   5   20.00    8.00
  -7  12   5   15.90   14.10
  -6 -12   5   19.20    8.20
   6 -12  -5   22.80   12.80
   6  12  -5   11.20    8.90
  -6  12   5   23.80   13.40
   5 -12  -5   77.29   17.20
  -5  12   5   69.49   16.50
   5  12  -5   68.09   13.50
   4 -12  -5   54.89   14.60
  -4 -12   5   24.00    9.40
  -4  12   5   48.60   13.70
   4  12  -5   44.80   11.80
   3 -12  -5   14.60   10.90
  -3 -12   5   12.80    8.40
   3  12  -5   10.30    9.50
  -3  12   5   10.90    9.00
  -2 -12   5  287.27   28.40
   2 -12  -5  252.17   29.30
   2  12  -5  229.28   27.30
  -2  12   5  292.07   29.40
  -1 -12   5    7.80    8.50
   1 -12  -5   -2.40    8.10
   1  12  -5   -0.30    8.70
  -1  12   5    1.70    7.80
   0 -12  -5   20.90   10.50
   0 -12   5   18.80   10.40
   0  12   5   22.50   10.40
   1 -12   5  148.69   21.70
  -1 -12  -5  141.59   20.30
  -1  12  -5  163.28   23.60
   1  12   5  103.09   17.80
  -2 -12  -5  107.79   16.90
   2 -12   5   66.59   16.20
   2  12   5   79.39   15.10
  -2  12  -5   86.69   18.10
  -3 -12  -5  115.99   18.20
   3 -12   5  109.89   19.50
  -3  12  -5   95.59   19.90
   3  12   5  133.79   18.10
  -4 -12  -5   -3.60    7.70
   4 -12   5   -6.00   11.20
  -4  12  -5    7.00   11.40
   4  12   5   -3.50    7.60
   5 -12   5   39.80   15.20
   5  12   5   30.90    9.70
  -5  12  -5   17.40   13.70
   6 -12   5   63.09   18.30
   6  12   5   67.29   12.70
  -6  12  -5   76.69   19.40
   7 -12   5   -7.60   16.50
  -7 -12  -5   -9.70    8.40
  -7  12  -5    7.90   17.10
   7  12   5  -16.20    7.40
   8 -12   5   28.30   18.90
   8  12   5   13.80    7.90
  -8  12  -5   10.00   20.10
   9 -12   5   -5.80   21.30
  -9  12  -5  -11.00   22.40
  10 -13  -5   58.69   27.80
 -10  13   5   13.20   40.80
   9 -13  -5  -31.20   20.60
  -9  13   5  -17.40   20.90
  -8 -13   5   20.90    5.70
  -8 -13   5   18.80    5.70
  -8  13   5    1.30   17.60
   7 -13  -5   12.70   17.50
  -7 -13   5   34.00    9.20
  -7  13   5   10.70   16.10
   6 -13  -5   -6.30   14.20
   6  13  -5   21.60   10.90
  -6  13   5  -12.50   13.10
   5 -13  -5   15.10   11.50
   5  13  -5    1.70   10.00
  -5  13   5  -15.60   11.70
  -4 -13   5   -6.40    8.70
   4 -13  -5   59.09   15.90
   4  13  -5   69.49   14.40
  -4  13   5   32.70   13.20
  -3 -13   5   26.80   10.40
   3 -13  -5   -5.40   11.20
   3  13  -5   13.80   10.70
  -3  13   5   22.10   11.10
  -2 -13   5  245.68   26.20
   2 -13  -5  238.28   27.90
  -2  13   5  196.78   27.20
   2  13  -5  168.18   25.40
   1 -13  -5   71.89   15.80
  -1 -13   5   50.69   13.00
   1  13  -5   53.49   15.00
  -1  13   5   49.00   13.60
   0 -13  -5   22.30   11.80
   0 -13   5   28.60   12.00
   0  13  -5    8.60   12.50
   0  13   5   38.40   11.50
  -1 -13  -5  120.09   19.90
   1 -13   5  124.09   20.50
  -1  13  -5  129.89   22.40
   1  13   5  126.09   19.00
  -2 -13  -5    8.60   10.30
   2 -13   5   59.59   14.70
   2  13   5   16.80    9.90
  -2  13  -5   43.10   13.20
  -3 -13  -5  252.97   27.80
   3 -13   5  208.08   31.00
   3  13   5  290.57   29.00
  -3  13  -5  282.07   32.90
   4 -13   5   45.90   15.40
   4  13   5   16.70   10.60
  -4  13  -5   40.50   15.80
   5 -13   5   99.99   20.80
  -5  13  -5   43.70   18.30
   6 -13   5   23.90   15.10
  -6 -13  -5   16.00   11.00
   6  13   5    6.50    8.90
  -6  13  -5   38.10   15.60
  -7 -13  -5   83.89   14.90
   7 -13   5   81.59   23.30
  -7  13  -5  105.09   24.30
   8 -13   5   20.70   22.60
  -8  13  -5  -16.50   20.30
   9 -13   5    4.60   25.10
  -9  13  -5    4.00   25.50
   9 -14  -5   36.60   28.10
  -9  14   5  -13.20   22.80
   8 -14  -5   33.00   22.20
  -8 -14   5   -7.50    6.80
  -8  14   5    2.10   20.20
  -7 -14   5    5.40    9.00
   7 -14  -5   10.20   18.90
  -7  14   5   20.20   17.20
   6 -14  -5   27.40   17.00
  -6 -14   5    0.70    9.30
   6  14  -5   -1.30   10.20
  -6  14   5   -7.40   14.10
   5 -14  -5  112.59   24.40
  -5  14   5  110.69   22.70
   5  14  -5   96.29   18.30
   4 -14  -5   42.60   16.20
   4  14  -5   26.10   12.40
  -4  14   5   24.50   13.30
   3 -14  -5   -3.10   12.00
  -3 -14   5    7.20   10.40
   3  14  -5    4.70   10.80
  -3  14   5    8.70   12.00
  -2 -14   5  442.86   39.30
  -2  14   5  351.26   38.80
  -1 -14   5   30.40   12.30
   1 -14  -5   -0.60   11.80
   1  14  -5    7.50   11.30
  -1  14   5   47.70   13.60
   0 -14   5   49.80   14.20
   0 -14  -5   53.69   15.80
   0  14   5   40.30   12.90
   0  14  -5   45.30   15.10
   1 -14   5  112.69   20.20
  -1 -14  -5  102.09   19.10
   1  14   5   72.79   15.90
  -1  14  -5   54.59   16.90
  -2 -14  -5   23.40   11.60
   2  14   5    2.90   10.60
  -2  14  -5   47.40   15.40
  -3 -14  -5   42.70   13.60
   3 -14   5   19.80   14.30
  -3  14  -5   30.50   15.50
   3  14   5    8.20   10.50
   4 -14   5  -24.50   13.10
  -4  14  -5   11.20   15.20
   5 -14   5   13.10   15.80
  -5  14  -5   21.00   16.50
   5  14   5   15.30   10.60
   6 -14   5    4.50   19.20
  -6 -14  -5   -0.70   11.10
   6  14   5   13.40   12.10
  -6  14  -5    9.10   16.60
   7 -14   5   19.50   21.70
  -7  14  -5   20.50   21.60
   8 -14   5   34.50   24.40
  -8  14  -5   27.40   23.30
   9 -15  -5   -6.40   28.60
  -9  15   5   23.20   29.80
  -8 -15   5    4.80    9.00
   8 -15  -5    9.80   23.90
  -8  15   5   35.40   23.50
   7 -15  -5  -19.80   20.10
  -7  15   5    4.60   18.40
   6 -15  -5   18.90   18.90
  -6 -15   5   13.10   11.80
  -6  15   5   -4.10   17.60
   5 -15  -5   49.99   18.50
   5  15  -5   40.00   13.90
  -5  15   5   24.80   16.30
   4 -15  -5   28.90   18.50
  -4 -15   5    2.50   17.20
  -4  15   5   66.39   17.70
   4  15  -5   71.29   17.10
   3 -15  -5    2.70   14.10
   3  15  -5   24.20   13.30
  -3  15   5   31.50   14.10
  -2 -15   5    6.80   11.20
   2 -15  -5    0.00   11.40
  -2  15   5   23.80   12.30
   2  15  -5    3.60   12.50
   1 -15  -5    4.70   13.70
  -1 -15   5   37.40   13.80
   1  15  -5   14.20   13.60
  -1  15   5   25.10   13.40
   0 -15   5   60.89   17.70
   0 -15  -5   32.70   15.30
   0  15  -5   58.29   16.40
   0  15   5   62.59   15.90
   1 -15   5   14.10   13.40
  -1 -15  -5   20.60   12.80
   1  15   5   19.00   11.30
  -1  15  -5   20.00   15.20
  -2 -15  -5  328.47   37.60
   2 -15   5  351.56   39.90
   2  15   5  389.16   37.00
  -2  15  -5  350.36   41.50
   3 -15   5   -6.00   14.10
  -3  15  -5    7.40   15.60
   4 -15   5   24.80   18.60
  -4 -15  -5    8.10   11.90
   4  15   5   51.99   14.90
  -5 -15  -5    4.00   11.90
   5 -15   5   -0.80   16.50
  -5  15  -5   -1.40   19.00
   5  15   5   15.40   12.40
   6 -15   5  -25.70   19.80
  -6  15  -5   -0.60   18.80
   7 -15   5   41.10   25.00
  -7  15  -5   17.90   24.40
   8 -15   5   64.99   30.40
  -8  15  -5   15.50   27.80
  -8 -16   5   48.10   18.50
   8 -16  -5   41.00   28.10
  -8  16   5   44.80   29.60
   7 -16  -5   49.60   25.60
  -7  16   5   41.70   25.00
   6 -16  -5   36.20   21.90
  -6  16   5   13.20   17.80
   5 -16  -5   79.39   21.70
  -4 -16   5   20.00   13.10
   4 -16  -5  -15.80   14.50
  -4  16   5   -1.10   14.50
   4  16  -5   16.50   15.30
   3 -16  -5  140.09   24.60
  -3 -16   5   51.29   18.20
  -3  16   5  127.29   25.10
   3  16  -5  133.59   23.50
   2 -16  -5   53.79   18.80
   2  16  -5   41.70   17.10
  -2  16   5   50.09   17.10
   1 -16  -5   73.89   20.30
  -1 -16   5   36.70   16.00
  -1  16   5   65.59   17.10
   1  16  -5   62.09   19.70
   0 -16   5   57.19   16.50
   0 -16  -5   66.19   17.70
   0  16  -5   53.09   17.90
   0  16   5   20.00   13.70
  -1 -16  -5   50.89   18.70
   1 -16   5   45.30   18.50
  -1  16  -5   86.39   22.00
   1  16   5   96.29   18.90
   2 -16   5   71.59   20.30
  -2  16  -5   89.99   21.80
  -3 -16  -5   64.19   17.20
   3 -16   5   33.40   17.50
   3  16   5   12.40   13.90
  -3  16  -5   43.10   18.80
   4 -16   5   11.70   19.20
  -4 -16  -5   13.50   14.10
   4  16   5   27.20   15.20
  -4  16  -5    9.20   19.70
   5 -16   5   42.30   26.10
  -5  16  -5   34.30   23.70
   6 -16   5   42.70   25.60
  -6  16  -5   55.89   23.40
   7 -16   5   29.80   25.60
  -7  16  -5   38.20   27.30
   8 -16   5   47.30   50.89
   8 -17  -5  -26.80   33.60
   7 -17  -5   40.00   29.40
  -7  17   5   22.20   25.90
  -6  17   5   35.40   24.40
   5 -17  -5    8.70   22.70
  -5  17   5   19.70   21.10
   4 -17  -5   -7.70   19.20
  -4  17   5   -0.50   18.90
  -3 -17   5   71.99   20.10
   3 -17  -5   79.19   21.80
   3  17  -5   58.89   19.60
  -3  17   5   48.00   20.50
  -2 -17   5  134.59   24.80
   2 -17  -5  119.09   25.50
   2  17  -5  114.49   23.80
  -2  17   5   95.49   22.60
   1 -17  -5   13.10   16.40
  -1  17   5    0.70   15.50
   0 -17   5    4.80   16.80
   0  17  -5   23.30   18.80
   0  17   5   -4.90   14.40
   1 -17   5   31.60   18.40
   1  17   5   41.80   17.30
  -1  17  -5   33.10   18.90
  -2 -17  -5   13.30   15.70
   2 -17   5   14.60   18.70
   2  17   5    1.60   14.70
  -2  17  -5    5.70   16.90
  -3 -17  -5   63.19   19.00
   3 -17   5   18.20   18.00
  -3  17  -5   60.09   23.70
   4 -17   5   37.60   22.50
  -4  17  -5  -13.90   18.60
   5 -17   5   48.00   25.20
  -5  17  -5   28.50   23.10
   6 -17   5  -12.10   24.10
  -6  17  -5   73.89   29.20
   7 -17   5   19.90   32.80
   7 -18  -5  -39.50   31.70
  -7  18   5  -20.80   29.70
   6 -18  -5    0.60   28.20
  -6  18   5  -36.40   23.60
   5 -18  -5    8.10   25.30
  -5  18   5   -5.40   21.70
   4 -18  -5   32.30   24.20
  -4  18   5  -20.00   22.00
   3 -18  -5   99.59   26.90
  -3  18   5   78.09   25.40
   2 -18  -5   19.30   20.60
  -2 -18   5   19.90   18.50
   2  18  -5   16.70   20.00
  -2  18   5   10.30   17.80
  -1 -18   5    8.30   18.30
   1  18  -5   14.80   21.50
  -1  18   5   29.60   21.70
   0 -18  -5   90.99   23.80
   0 -18   5   63.09   25.70
   0  18  -5  109.59   28.10
   0  18   5  124.39   24.80
  -1 -18  -5   -8.30   18.10
  -1  18  -5   18.40   22.70
   1  18   5   19.50   17.80
   2 -18   5   -7.40   20.00
  -2  18  -5    9.70   21.50
   3 -18   5   -4.70   18.80
  -3  18  -5   29.80   22.40
   4 -18   5    1.90   25.80
  -4  18  -5   -8.00   25.20
   5 -18   5  -18.40   26.60
  -5  18  -5  -18.00   26.60
   6 -18   5   82.99   34.20
  -6  18  -5   41.40   31.00
   6 -19  -5  -19.40   33.10
  -6  19   5   13.90   33.00
   5 -19  -5    2.60   27.30
  -5  19   5   54.59   28.20
   4 -19  -5   14.60   24.60
  -4  19   5   11.60   26.70
  -3  19   5   12.90   20.90
  -2  19   5   13.40   20.30
   1 -19  -5    9.80   21.40
  -1  19   5    0.60   21.10
   0 -19  -5   55.59   25.10
   0 -19   5   38.10   22.90
   0  19  -5   25.00   24.20
   0  19   5   60.59   23.30
   1 -19   5   20.40   21.70
  -1  19  -5   25.60   25.30
  -2  19  -5   43.50   26.00
  -3  19  -5   21.80   27.10
   4 -19   5  107.99   33.80
  -4  19  -5   48.80   29.50
   5 -19   5   37.10   33.60
  -5  19  -5   57.99   30.00
   6 -19   5   77.99   41.20
  -6  19  -5   61.39   35.30
   6 -20  -5  -38.50   34.90
  -6  20   5   45.30   35.40
  -5  20   5    8.70   34.90
  -4  20   5   -2.00   28.20
   3 -20  -5   33.10   29.40
  -3  20   5   14.20   25.40
   2 -20  -5   14.70   25.40
  -2  20   5   29.10   24.70
   1 -20   5   79.79   32.00
   2 -20   5   50.29   28.50
  -2  20  -5   29.10   28.40
   3 -20   5   28.90   29.60
  -3  20  -5    2.70   28.50
   4 -20   5    8.10   39.00
  -4  20  -5  -62.89   31.90
   5 -21  -5   -7.60   39.90
  -5  21   5   10.10   36.80
   4 -21  -5  -23.30   34.30
  -4  21   5  -14.00   34.60
   4 -21   5   14.10   40.20
   5 -21   5 -112.39   50.59
 -11   0   6    1.50    6.10
  11   0  -6   16.00    5.60
 -10   0   6   17.20    7.50
  10   0  -6   44.30    7.70
  -9   0   6  904.61   67.19
   9   0  -6  857.61   66.69
  -8   0   6   86.79   11.20
   8   0  -6   75.39   10.90
   7   0  -6   10.90    5.10
  -7   0   6    7.50    4.80
  -6   0   6  129.89   13.60
   6   0  -6  132.89   14.00
  -5   0   6 1857.41  138.29
   5   0  -6 1926.01  138.69
   4   0  -6  241.98   21.50
  -4   0   6  247.68   21.40
  -3   0   6 3241.28  234.18
  -2   0   6 3192.58  230.78
  -1   0   6    6.40    3.00
   1   0  -6   12.20    4.20
   1   0   6   58.39    8.70
   2   0   6   23.30    6.00
   2   0   6   17.60    5.20
   4   0   6  359.06   34.00
   4   0   6  455.75   34.90
   5   0   6  119.39   14.70
   5   0   6  128.19   15.10
   6   0   6  185.38   20.30
   6   0   6  204.98   20.60
   7   0   6    7.50    7.70
   7   0   6   23.80    8.30
   8   0   6  569.24   47.70
   8   0   6  571.74   47.70
   9   0   6  264.37   26.20
   9   0   6  234.98   26.00
  10   0   6    4.00    8.70
  10   0   6   -0.50    9.30
  11   0   6  211.18   24.30
  12   0   6   -0.90   10.90
  11  -1  -6  106.89   14.10
 -11   1   6  125.29   15.60
  10  -1  -6   11.60   10.10
 -10  -1   6   11.50    4.90
  -9  -1   6   40.90    8.60
   9  -1  -6   66.19   10.20
  -9   1   6   62.49   10.80
   8  -1  -6   79.19   11.50
  -8  -1   6   85.79   10.40
  -8   1   6   71.49   11.70
   8   1  -6   94.09   10.70
  -7  -1   6   10.30    4.80
   7  -1  -6    5.60    5.10
   7   1  -6    6.20    4.70
  -7   1   6    7.20    4.80
  -6  -1   6   81.99    9.60
   6  -1  -6   71.49   10.80
  -6   1   6   78.29   12.10
   6   1  -6   79.49   10.30
  -5  -1   6   83.69    9.90
   5  -1  -6   88.39   10.90
  -5   1   6   89.29   10.70
   5   1  -6   89.19   10.40
  -4  -1   6  303.07   25.00
   4  -1  -6  305.87   25.80
  -4   1   6  289.87   25.40
   4   1  -6  292.67   25.00
  -3  -1   6   -2.30    2.70
  -3   1   6    0.70    2.80
   3   1  -6   -3.50    2.80
   2  -1  -6   97.19   10.90
  -2  -1   6   87.29   10.20
  -2   1   6  102.99   11.00
  -1  -1   6  803.72   69.89
   1  -1  -6  947.21   70.69
   1   1  -6  940.71   70.69
  -1   1   6 1056.49   71.09
   0  -1  -6  821.72   59.49
   0  -1   6  729.13   58.99
   0   1   6  772.02   59.69
   1  -1   6 1269.97  101.39
   1  -1   6 1331.67  101.49
  -1  -1  -6 1517.55  101.89
   1   1   6 1338.47  101.19
   2  -1   6  365.16   32.00
   2  -1   6  373.56   32.30
  -2  -1  -6  399.36   32.00
   2   1   6  391.56   31.90
   3   1   6  524.35   40.00
   3   1   6  458.95   39.70
   4  -1   6  879.11   64.19
   4   1   6  797.52   62.59
   4   1   6  764.22   62.79
   5  -1   6   55.29   10.30
   5   1   6   54.89    9.90
   5   1   6   70.39   10.70
   6  -1   6   22.10    8.10
   6  -1   6   31.80    8.70
   6   1   6   24.60    7.30
   6   1   6   16.70    7.40
   7  -1   6   20.90    8.60
   7  -1   6   16.90    8.70
   7   1   6   21.40    7.30
   7   1   6   17.90    7.50
   8  -1   6  173.08   22.10
   8  -1   6  198.78   23.00
   8   1   6  209.68   21.20
   8   1   6  194.48   20.90
   9  -1   6  284.87   27.60
   9  -1   6  228.98   25.60
   9   1   6  239.28   24.40
   9   1   6  216.18   26.80
  10  -1   6   16.30   12.10
  10   1   6   26.00    9.20
  10   1   6   22.00    9.00
  11  -1   6   10.10   11.60
  11   1   6   23.50    9.10
  12  -2  -6    4.60    9.60
 -12   2   6   15.10   11.30
  11  -2  -6   17.20    9.20
 -11   2   6   -6.60    9.70
  10  -2  -6   17.30    8.50
 -10   2   6   20.30   10.20
  -9  -2   6  152.78   12.60
  -9  -2   6  143.19   12.60
   9  -2  -6  145.69   18.40
  -9   2   6  121.09   17.40
   8  -2  -6   61.59   10.60
  -8  -2   6   62.49    7.80
  -8   2   6   57.19   10.60
   7  -2  -6  131.09   15.60
  -7  -2   6  113.19   12.40
   7   2  -6  148.39   13.30
  -7   2   6  141.79   15.30
  -6  -2   6   29.70    5.40
   6  -2  -6   19.00    6.80
  -6   2   6   20.40    6.20
   6   2  -6   36.00    6.10
  -5  -2   6   44.90    6.90
   5  -2  -6   43.30    8.70
  -5   2   6   51.29    8.80
   5   2  -6   43.90    7.20
  -4  -2   6   14.70    4.40
   4  -2  -6    9.60    4.30
   4   2  -6   21.20    5.00
  -4   2   6   11.50    4.80
  -3  -2   6  532.25   40.80
   3   2  -6  533.25   41.20
  -3   2   6  495.35   41.40
  -2  -2   6  157.88   14.10
   2  -2  -6  116.09   13.60
  -2   2   6  137.69   14.00
  -1  -2   6  498.05   36.30
   1  -2  -6  437.46   36.00
  -1  -2   6  431.06   36.00
  -1   2   6  415.36   35.70
   0  -2   6    7.60    3.60
   0  -2   6   -0.80    3.40
   0  -2  -6   -0.10    3.30
   0   2   6    0.10    3.00
   1  -2   6   -3.20    3.40
  -1  -2  -6    1.50    3.10
   1   2   6   -0.50    2.80
  -2  -2  -6 1435.26  106.39
  -2   2  -6 1493.75  107.49
   2   2   6 1374.66  106.29
   3  -2   6   11.20    5.20
   3   2   6    4.20    4.10
  -3   2  -6   21.60    5.80
   4   2   6   62.39    9.30
  -4   2  -6   35.30    8.20
   4   2   6   26.50    7.30
   5  -2   6  381.36   32.20
   5   2   6  325.27   30.20
  -5   2  -6  306.47   30.80
   5   2   6  379.46   30.20
   6  -2   6    5.00    6.70
   6   2   6   -2.20    5.00
  -6   2  -6    4.80    6.50
   6   2   6   -0.10    5.20
   7  -2   6    5.40    7.90
   7   2   6    5.70    6.10
   7   2   6    8.00    6.30
   8  -2   6   91.69   15.20
   8   2   6   84.09   12.60
   8   2   6   61.49   11.30
   9  -2   6   82.39   14.90
   9  -2   6   97.09   17.10
  10  -2   6   16.50   11.40
  10   2   6    4.00    6.80
  10   2   6   -0.50    7.10
  11  -2   6   -1.10   12.40
  12  -2   6    9.90   15.80
  13  -3  -6    2.80   13.00
 -13   3   6   12.10   15.00
  12  -3  -6    8.80   12.00
 -12   3   6  -27.00   12.90
  11  -3  -6   22.90   10.60
 -11   3   6   -2.30   18.20
  10  -3  -6   29.80   10.20
 -10   3   6   31.30   11.30
   9  -3  -6   -1.20    7.80
  -9   3   6   17.20    8.60
  -8  -3   6    7.50    3.10
   8  -3  -6    0.50    7.10
  -8  -3   6   10.30    3.00
  -8   3   6    8.60    7.10
   7  -3  -6   81.79   14.20
  -7  -3   6   86.19    8.90
  -7  -3   6   84.19    9.40
  -7   3   6   71.19   12.50
   6  -3  -6  127.39   15.70
  -6  -3   6  142.39   12.90
  -6  -3   6  133.89   13.20
  -6   3   6  128.99   15.50
  -5  -3   6  102.19   10.60
   5  -3  -6  131.79   14.10
  -5  -3   6   81.69   10.60
  -5   3   6  120.19   13.30
  -4  -3   6   78.09    9.70
  -4  -3   6   62.19    8.70
  -4   3   6   55.19    9.60
  -3  -3   6   32.80    6.10
  -3  -3   6   27.10    6.10
   3  -3  -6   21.60    6.30
  -3   3   6   23.10    6.10
  -2  -3   6 1496.05  112.39
  -2  -3   6 1473.05  112.59
   2  -3  -6 1644.74  113.69
  -2   3   6 1489.55  113.09
  -1  -3   6   11.00    4.00
   1  -3  -6   11.40    4.50
  -1   3   6    7.60    4.20
   0  -3   6   84.99   12.70
   0  -3  -6   87.29   10.10
   0   3   6   51.49    9.10
   0   3  -6   78.49   10.80
  -1  -3  -6  886.11   64.29
   1  -3   6  805.82   64.69
   1   3   6  733.83   63.49
  -1   3  -6  930.31   65.29
   2  -3   6   21.70    6.20
  -2  -3  -6   17.40    5.40
  -2   3  -6   30.00    7.00
   2   3   6   14.80    4.80
  -3  -3  -6 1958.00  142.99
   3  -3   6 1887.21  144.39
   3   3   6 1941.11  142.79
  -3   3  -6 1987.70  144.79
  -4   3  -6  220.38   22.40
   4   3   6  213.48   20.40
   5  -3   6    1.40    6.30
   5   3   6   -5.40    4.30
  -5   3  -6   -1.60    5.80
   6  -3   6  219.78   24.00
   6   3   6  221.98   21.10
   6   3   6  217.58   21.70
  -6   3  -6  246.88   24.60
   7  -3   6   97.49   15.80
   7   3   6  115.99   14.30
  -7   3  -6   99.59   16.50
   7   3   6   96.89   13.00
   8  -3   6    4.70    9.10
  -8   3  -6   12.70   10.60
   8   3   6   14.00    6.30
   8   3   6   16.80    7.50
   9  -3   6    2.20   10.30
   9   3   6   -5.60    6.00
  10  -3   6   25.10   12.50
  10   3   6   15.00    6.70
  10   3   6    8.70    6.20
  11  -3   6   21.60   14.10
  12  -3   6   24.20   17.60
 -13   4   6   45.80   21.30
  12  -4  -6  -16.10   13.30
 -12   4   6   -0.30   15.20
  11  -4  -6   50.19   14.30
 -11   4   6   41.70   14.80
  10  -4  -6   41.30   13.30
 -10   4   6   74.09   15.20
   9  -4  -6  134.19   20.10
  -9   4   6  183.58   22.10
   8  -4  -6  125.69   17.30
  -8   4   6  120.79   17.30
   7  -4  -6   72.29   13.10
  -7  -4   6   73.49    8.00
  -7  -4   6   79.79    8.60
  -7   4   6   79.79   13.30
   6  -4  -6   12.80    6.80
  -6  -4   6   12.30    3.40
  -6   4   6   -2.10    5.20
  -5  -4   6  249.28   20.80
   5  -4  -6  272.87   26.20
  -5  -4   6  236.08   20.20
  -5   4   6  205.78   22.30
   4  -4  -6   13.30    6.10
  -4  -4   6   12.30    4.70
  -4  -4   6   21.90    5.30
  -4   4   6   22.90    6.70
  -3  -4   6  427.16   35.30
   3  -4  -6  433.06   36.70
  -3  -4   6  412.46   35.00
  -3   4   6  488.35   37.00
  -2  -4   6    3.30    3.90
   2  -4  -6    2.10    4.70
  -2   4   6   14.80    4.90
  -1  -4   6   23.60    6.10
   1  -4  -6   38.30    7.20
   1   4  -6   22.50    6.10
  -1   4   6   18.90    5.90
   0  -4   6  813.32   57.09
   0  -4  -6  726.13   55.99
   0   4  -6  671.63   56.09
   0   4   6  664.23   55.49
  -1  -4  -6    8.40    4.00
   1  -4   6    5.50    4.40
   1   4   6    8.00    4.20
  -1   4  -6    5.30    4.70
  -2  -4  -6  305.57   26.50
   2  -4   6  327.07   28.40
  -2   4  -6  348.87   28.70
   2   4   6  260.27   26.00
   3  -4   6  548.35   43.10
  -3  -4  -6  468.35   40.30
   3   4   6  531.85   40.90
  -3   4  -6  467.85   42.20
   4  -4   6   20.40    7.00
  -4  -4  -6   22.00    6.50
   4   4   6   14.20    5.30
  -4   4  -6   24.50    7.50
   5   4   6   12.00    5.40
   5   4   6   21.00    5.80
  -5   4  -6    7.90    7.70
   6  -4   6   46.40   12.40
   6   4   6   60.79   10.00
  -6   4  -6   68.99   14.10
   6   4   6   59.49   10.00
   7  -4   6   30.10   10.70
   7   4   6   23.80    7.60
  -7   4  -6   42.40   11.30
   7   4   6   25.40    6.90
   8  -4   6  183.58   24.90
   8   4   6  220.58   20.50
   8   4   6  192.58   19.40
   9  -4   6   47.60   13.70
   9   4   6   58.19    9.50
  -9   4  -6   61.09   16.00
   9   4   6   46.50   13.70
  10  -4   6   10.20   13.30
  10   4   6   -2.10    3.80
  10   4   6    9.60    4.40
  11  -4   6  165.28   24.40
  12  -4   6    6.60   19.80
  13  -5  -6   45.30   19.90
 -13   5   6   25.80   20.80
  12  -5  -6  -10.60   15.40
 -12   5   6   35.90   18.70
  11  -5  -6   26.40   14.80
 -11   5   6   16.20   14.20
  10  -5  -6    5.80   10.70
 -10   5   6    0.50   11.60
   9  -5  -6    2.60    8.80
  -9   5   6    0.20    9.10
   8  -5  -6   89.89   18.20
  -8   5   6  120.99   17.40
   7  -5  -6  571.94   48.60
  -7  -5   6  583.14   42.60
  -7  -5   6  571.84   42.30
  -7   5   6  551.84   47.90
   6  -5  -6    0.20    6.40
  -6  -5   6    1.20    3.90
  -6  -5   6   -4.00    2.70
  -6   5   6    2.50    5.40
  -5  -5   6  714.63   53.89
  -5  -5   6  679.23   53.29
  -5   5   6  725.13   56.79
  -4  -5   6  351.16   29.30
  -4  -5   6  338.37   28.80
   4  -5  -6  299.07   30.80
  -4   5   6  429.26   32.20
   3  -5  -6  333.47   31.00
  -3  -5   6  338.37   29.70
  -3   5   6  399.66   31.70
  -2  -5   6   99.39   13.10
   2  -5  -6  106.99   14.30
   2   5  -6   98.79   12.20
  -2   5   6  107.59   16.20
   1  -5  -6  608.34   48.00
  -1  -5   6  665.13   48.30
  -1   5   6  547.05   47.50
   1   5  -6  565.04   47.70
   0  -5  -6   26.60    6.20
   0  -5   6   19.10    6.30
   0   5   6   20.20    6.10
   0   5  -6   15.50    6.20
  -1  -5  -6   32.80    7.20
   1  -5   6   27.20    7.10
  -1   5  -6   17.20    6.20
   1   5   6   20.00    5.50
  -2  -5  -6    4.60    4.30
   2  -5   6    7.70    5.80
   2   5   6    7.90    4.30
   3  -5   6  304.97   29.70
  -3  -5  -6  306.07   27.70
   3   5   6  343.27   28.10
  -3   5  -6  318.57   30.20
  -4  -5  -6   65.89   10.40
   4  -5   6   72.69   12.90
   4   5   6   76.19   11.00
  -4   5  -6   75.69   13.40
   5  -5   6  391.16   39.10
  -5   5  -6  444.86   40.10
   5   5   6  472.85   36.50
   6  -5   6  975.40   77.79
  -6   5  -6  783.32   72.09
   6   5   6  858.11   68.29
   6   5   6  991.10   69.59
   7  -5   6   47.00   12.50
  -7   5  -6   37.30   12.40
   7   5   6   44.50    9.40
   7   5   6   38.90    7.90
   8  -5   6    3.10    9.80
  -8   5  -6   -7.70   10.40
   8   5   6    2.20    5.00
   9  -5   6  121.39   19.00
  -9   5  -6   93.09   19.00
   9   5   6   53.39    8.50
  10  -5   6    5.10   14.80
 -10   5  -6  -15.00   15.60
  11  -5   6    8.10   17.40
  12  -5   6   54.79   23.60
  13  -6  -6   -5.60   22.50
  12  -6  -6    2.70   19.60
  11  -6  -6   11.00   15.30
 -11   6   6   30.10   16.60
  10  -6  -6   24.80   13.30
 -10   6   6   28.40   13.90
   9  -6  -6   83.59   16.20
  -9   6   6   83.19   18.50
   8  -6  -6  228.58   25.90
  -8   6   6  224.28   25.50
  -7  -6   6   17.30    3.70
  -7  -6   6   24.30    4.10
   7  -6  -6   39.40   10.90
  -7   6   6   25.70    9.40
  -6  -6   6   13.90    4.60
  -6  -6   6   24.50    5.00
  -6   6   6   23.70    7.70
  -5  -6   6   92.09   10.80
   5  -6  -6  119.39   16.40
  -5  -6   6   87.49   11.50
  -5   6   6   76.99   13.80
   4  -6  -6  248.28   25.30
  -4  -6   6  279.27   23.40
  -4  -6   6  255.57   23.30
  -4   6   6  258.17   25.30
   3  -6  -6  366.06   32.10
  -3  -6   6  334.67   30.20
  -3   6   6  354.86   31.60
   3   6  -6  365.66   30.50
  -2  -6   6  258.77   24.80
   2  -6  -6  314.67   26.60
   2   6  -6  258.37   24.80
  -2   6   6  271.67   25.60
   1  -6  -6   67.29   10.80
  -1  -6   6   63.99   10.10
  -1   6   6   59.99   10.50
   1   6  -6   35.00    8.40
   0  -6  -6    3.80    4.90
   0  -6   6    5.20    5.20
   0   6   6    1.90    3.90
   0   6  -6    6.50    4.80
  -1  -6  -6   72.79   11.10
   1  -6   6   68.29   12.00
  -1   6  -6   65.99   12.10
   1   6   6   52.79    9.70
   2  -6   6    9.40    6.20
  -2  -6  -6    2.80    4.80
  -2   6  -6    8.60    5.70
   2   6   6   12.20    4.50
   3  -6   6  601.74   50.49
  -3  -6  -6  580.14   47.80
  -3   6  -6  561.14   50.29
   3   6   6  643.84   48.30
  -4  -6  -6    1.00    4.70
   4  -6   6    5.10    6.80
  -4   6  -6   -7.20    6.10
   5  -6   6   34.00    9.80
  -5  -6  -6   42.10    8.60
  -5   6  -6   15.30    9.10
   5   6   6   32.30    7.60
   6  -6   6   -6.40    9.00
  -6   6  -6   11.20    9.60
   6   6   6   21.20    6.20
   6   6   6   28.60    7.00
   7  -6   6   71.29   16.00
   7   6   6   76.59   10.60
   7   6   6   76.99   11.40
  -7   6  -6   50.19   14.90
   8  -6   6   21.00   12.50
   8   6   6   28.50    6.30
   8   6   6   17.20    6.70
  -8   6  -6   18.50   12.80
   9  -6   6   37.90   14.20
   9   6   6   19.00    5.10
  -9   6  -6    8.80   17.20
  10  -6   6  -18.40   16.00
 -10   6  -6   24.10   19.20
  11  -6   6  -21.20   18.20
 -11   6  -6  -29.10   21.90
  12  -7  -6   58.99   20.90
 -12   7   6   28.70   22.20
  11  -7  -6   80.09   20.20
 -11   7   6  106.69   22.50
  10  -7  -6    6.30   14.70
 -10   7   6   24.20   14.30
   9  -7  -6  131.29   21.80
  -9   7   6  150.18   22.50
   8  -7  -6   51.29   13.10
  -8   7   6   28.20   11.30
  -7  -7   6   74.49    7.80
  -7  -7   6   62.19    7.50
  -7   7   6   78.49   14.80
   6  -7  -6    5.20    8.20
  -6  -7   6   24.20    5.50
  -6  -7   6   11.60    5.00
  -6   7   6   19.80    8.60
   5  -7  -6  491.45   40.50
  -5  -7   6  425.26   35.40
  -5  -7   6  392.16   37.00
  -5   7   6  471.35   39.50
   4  -7  -6  181.58   20.60
  -4  -7   6  197.58   18.30
  -4   7   6  160.28   19.60
   4   7  -6  163.58   17.90
  -3  -7   6  118.99   15.20
  -3   7   6  124.49   17.30
   3   7  -6  166.98   16.30
   2  -7  -6  189.98   19.50
  -2  -7   6  148.29   17.40
  -2   7   6  167.48   18.50
   2   7  -6  170.78   18.40
  -1  -7   6   40.40    9.10
   1  -7  -6   55.79   10.20
  -1   7   6   75.09   11.90
   1   7  -6   48.10    9.90
   0  -7  -6   83.99   12.50
   0  -7   6   62.49   11.30
   0   7   6   67.69   11.30
   0   7  -6   54.59   10.90
   1  -7   6  262.47   24.20
  -1  -7  -6  214.68   22.00
   1   7   6  190.78   21.20
  -1   7  -6  245.08   24.10
   2  -7   6    6.10    7.00
  -2  -7  -6   12.00    5.90
  -2   7  -6   18.30    7.70
   2   7   6    8.90    4.80
   3  -7   6  238.98   25.20
  -3  -7  -6  213.38   20.90
  -3   7  -6  182.88   24.60
   3   7   6  209.18   20.90
  -4  -7  -6    4.50    5.70
   4  -7   6   -2.90    7.60
   4   7   6    3.40    4.90
  -4   7  -6   -1.90    6.90
   5  -7   6   85.89   16.30
  -5  -7  -6  103.89   13.50
  -5   7  -6   78.69   16.00
   5   7   6   82.39   12.20
   6  -7   6  173.98   23.80
  -6   7  -6  180.98   25.20
   6   7   6  147.59   16.60
  -7   7  -6   21.00   12.10
   7   7   6   18.50    6.50
   7   7   6   13.00    6.70
   8  -7   6    6.10   11.60
  -8   7  -6    6.90   12.30
   8   7   6    6.70    6.10
   8   7   6    5.90    5.00
   9  -7   6   34.10   15.10
  -9   7  -6   34.60   18.00
  10  -7   6   -8.00   17.00
 -10   7  -6   -8.90   18.90
  11  -7   6  -33.10   20.60
 -11   7  -6   34.40   24.80
  12  -8  -6   41.80   22.30
 -12   8   6   64.99   28.90
  11  -8  -6   -5.10   17.30
 -11   8   6  -12.40   18.20
  10  -8  -6  146.39   25.60
 -10   8   6  158.98   35.70
   9  -8  -6   32.40   14.30
  -9   8   6   -1.60   11.90
   8  -8  -6    2.00   11.10
  -8   8   6   17.40   10.20
  -7  -8   6   16.20    4.30
   7  -8  -6    4.00    9.60
  -7  -8   6   14.60    4.10
  -7   8   6   15.60    9.90
  -6  -8   6   59.89    9.10
   6  -8  -6   73.09   13.80
  -6  -8   6   68.79    9.70
  -6   8   6   82.09   15.40
  -5  -8   6  159.78   17.70
   5  -8  -6  208.38   22.90
  -5   8   6  177.98   21.10
   4  -8  -6  234.08   25.50
  -4  -8   6  221.68   28.20
   4   8  -6  255.27   23.40
  -4   8   6  236.98   25.40
  -3  -8   6    9.60    5.70
   3  -8  -6    0.50    6.80
  -3   8   6   12.50    6.50
   3   8  -6    0.90    5.30
  -2  -8   6  397.96   33.50
   2  -8  -6  393.46   34.50
  -2   8   6  313.87   32.60
   2   8  -6  378.76   33.30
   1  -8  -6  204.28   20.90
  -1  -8   6  163.48   19.80
   1   8  -6  187.38   20.70
  -1   8   6  192.98   20.20
   0  -8   6   -5.70    5.90
   0  -8  -6    5.70    6.30
   0   8  -6    9.20    6.60
   0   8   6    7.20    5.90
  -1  -8  -6   10.00    6.40
   1  -8   6    2.00    6.80
  -1   8  -6    8.50    6.60
   1   8   6    5.40    5.30
  -2  -8  -6  453.25   39.30
   2  -8   6  412.16   40.70
  -2   8  -6  518.85   42.40
   2   8   6  461.75   39.20
  -3  -8  -6   23.50    7.60
   3  -8   6   26.80    9.80
   3   8   6   40.50   12.30
  -3   8  -6   32.10   10.60
  -4  -8  -6   11.00    7.00
  -4   8  -6   10.00    9.00
   4   8   6    1.40    5.60
  -5  -8  -6   -1.20    5.50
   5  -8   6   -7.10    8.70
   5   8   6    4.00    5.20
  -5   8  -6   -5.20   10.00
   6  -8   6  371.56   37.80
  -6  -8  -6  360.56   32.30
   6   8   6  398.66   32.20
  -6   8  -6  334.37   37.30
   7  -8   6    7.90   10.50
  -7   8  -6   -1.40   11.10
   7   8   6   -6.90    6.30
   7   8   6    4.20    5.80
   8  -8   6   36.20   16.60
   8   8   6   32.50    8.00
  -8   8  -6    9.00   14.70
   8   8   6   31.60    7.90
   9  -8   6   18.40   16.30
  -9   8  -6    5.90   16.90
  10  -8   6  -17.70   18.10
  11  -8   6   10.40   25.10
  11  -9  -6   25.60   21.20
 -11   9   6   28.00   21.10
  10  -9  -6   39.30   19.20
 -10   9   6   46.50   18.60
   9  -9  -6  -17.90   13.40
  -9   9   6  -14.60   13.20
  -8   9   6    8.50   11.20
   7  -9  -6  302.77   32.80
  -7  -9   6  273.07   23.80
  -7  -9   6  292.07   23.80
  -7   9   6  305.27   31.50
  -6  -9   6  104.19   12.90
   6  -9  -6  127.09   20.30
  -6  -9   6   98.29   13.00
  -6   9   6  135.29   19.70
   5  -9  -6  342.27   34.10
  -5  -9   6  369.86   30.10
   5   9  -6  332.17   30.00
  -5   9   6  298.57   33.20
  -4  -9   6   77.79   12.30
   4  -9  -6   74.59   14.60
   4   9  -6   89.79   13.20
  -4   9   6   58.39   13.40
   3  -9  -6   49.90   11.60
  -3  -9   6   21.50    8.00
  -3   9   6   27.30    9.80
   3   9  -6   42.90   10.10
  -2  -9   6    6.50    6.90
   2  -9  -6    2.60    7.00
  -2   9   6    0.20    6.70
   2   9  -6   -3.20    5.90
  -1  -9   6  415.46   35.40
   1  -9  -6  334.47   34.20
   1   9  -6  348.57   34.40
  -1   9   6  411.76   34.80
   0  -9   6  148.99   19.60
   0  -9  -6  119.49   17.50
   0   9  -6  133.69   19.40
   0   9   6  116.19   17.00
   1  -9   6 1020.80   77.19
  -1  -9  -6  974.90   75.39
  -1   9  -6 1031.10   77.79
   1   9   6  821.42   74.09
  -2  -9  -6  116.29   16.00
   2  -9   6   80.99   15.70
   2   9   6   70.49   12.70
  -2   9  -6  103.89   16.80
  -3  -9  -6   87.89   14.40
   3  -9   6  116.39   18.00
  -3   9  -6   91.49   17.00
   3   9   6   98.89   14.30
  -4  -9  -6    0.90    6.10
   4  -9   6   -1.20    8.80
   4   9   6    7.10    6.00
  -4   9  -6   -4.90    8.70
  -5  -9  -6   89.29   13.00
   5   9   6   92.79   13.30
  -5   9  -6   65.79   16.80
  -6  -9  -6   32.40    8.80
   6  -9   6   38.20   12.90
   6   9   6   51.19    9.50
  -6   9  -6    9.30   12.90
   7  -9   6   88.79   18.90
  -7   9  -6   93.29   19.20
   7   9   6   80.19   12.20
   8  -9   6   -3.20   13.60
   8   9   6    6.80    5.90
  -8   9  -6   -2.80   14.70
   8   9   6    4.50    6.60
   9  -9   6   67.29   21.00
  -9   9  -6   61.39   21.20
  10  -9   6   -5.90   20.40
 -10   9  -6    8.20   23.10
  11 -10  -6    8.50   22.20
 -11  10   6   31.50   23.80
  10 -10  -6   40.30   19.80
 -10  10   6    2.00   18.30
  -9  10   6    6.20   14.40
   8 -10  -6  165.28   25.10
  -8  10   6  131.89   22.60
  -7 -10   6   80.19   10.10
   7 -10  -6   70.79   16.90
  -7 -10   6   58.79   12.90
  -7  10   6   50.79   15.40
  -6 -10   6    9.10    6.00
  -6 -10   6    7.10    6.30
   6 -10  -6   10.00   11.90
  -5 -10   6  138.39   15.90
   5 -10  -6  113.69   19.90
  -5  10   6  124.69   20.00
   5  10  -6  109.19   15.80
   4 -10  -6   26.00   10.30
  -4 -10   6   24.50    8.50
   4  10  -6   20.90    8.60
  -4  10   6   22.50   10.00
  -3 -10   6  154.38   19.30
   3 -10  -6  157.98   22.00
  -3  10   6  163.78   22.60
   3  10  -6  172.88   19.70
   2 -10  -6    4.30    7.80
  -2 -10   6   -2.10    6.60
   2  10  -6   12.30    9.40
  -2  10   6    8.00    8.40
   1 -10  -6  244.48   24.20
  -1 -10   6  173.98   22.20
   1  10  -6  171.28   22.20
  -1  10   6  211.28   22.90
   0 -10  -6   28.30    9.20
   0 -10   6   36.40   10.70
   0  10   6   20.90    8.80
   0  10  -6   23.80    9.80
  -1 -10  -6   -1.20    6.60
   1 -10   6    8.30    8.00
   1  10   6    2.10    6.60
  -1  10  -6    1.80    6.70
   2 -10   6  117.69   19.10
  -2 -10  -6   98.99   15.80
  -2  10  -6   84.39   15.70
   2  10   6   89.89   14.40
  -3 -10  -6   46.60   10.60
   3 -10   6   17.80   11.60
  -3  10  -6   44.60   12.30
   3  10   6   41.00    9.40
  -4 -10  -6   -1.90    7.00
   4 -10   6    3.40   10.70
   4  10   6   -4.60    6.10
  -4  10  -6    4.80   10.10
  -5 -10  -6    2.00    6.50
   5 -10   6   15.90   12.00
   5  10   6    7.20    7.70
  -5  10  -6   16.50   11.90
  -6 -10  -6   -4.70    7.60
   6 -10   6   23.30   12.90
   6  10   6    9.30    7.20
  -6  10  -6    2.20   12.50
  -7 -10  -6   21.50   11.50
   7 -10   6   16.50   14.20
   7  10   6   14.40    8.60
  -7  10  -6   17.90   15.00
   8 -10   6  -12.00   15.60
   8  10   6    7.00    6.60
  -8  10  -6  -28.30   15.80
   8  10   6    6.90    7.50
  -9  10  -6   -3.70   18.80
  10 -10   6   15.60   21.80
 -10  10  -6   -0.80   23.50
  10 -11  -6   25.10   22.00
 -10  11   6    1.70   20.10
   9 -11  -6  -12.30   17.00
  -9  11   6   71.39   20.90
  -8 -11   6   41.30    4.60
   8 -11  -6   39.90   17.90
  -8 -11   6   37.70    4.40
  -8  11   6   52.79   17.00
   7 -11  -6   19.40   13.70
  -7 -11   6    9.50    6.30
  -7  11   6   12.80   12.30
   6 -11  -6  228.18   30.80
  -6 -11   6  232.28   22.90
  -6  11   6  224.58   29.50
   5 -11  -6  380.26   40.00
  -5  11   6  350.46   38.40
   5  11  -6  439.36   36.30
   4 -11  -6    4.90    8.60
  -4 -11   6   16.40    8.00
  -4  11   6   -2.60    8.70
   4  11  -6    5.00    8.70
   3 -11  -6  113.19   19.10
  -3 -11   6  121.39   17.40
   3  11  -6  115.09   18.10
  -3  11   6  103.49   17.90
   2 -11  -6   49.00   12.50
  -2 -11   6   83.29   14.50
   2  11  -6   38.20   11.00
  -2  11   6   73.69   13.70
   1 -11  -6  115.89   19.20
  -1 -11   6  160.78   21.40
  -1  11   6  143.79   20.90
   1  11  -6  113.79   21.50
   0 -11  -6   26.40   10.60
   0 -11   6   33.90   10.60
   0  11   6   35.30   10.90
   0  11  -6   40.90   12.40
   1 -11   6   42.90   12.60
  -1 -11  -6   61.39   15.60
  -1  11  -6   48.60   12.60
   1  11   6   35.20   10.50
   2 -11   6   64.59   14.60
  -2 -11  -6   54.09   12.40
  -2  11  -6   40.70   12.90
   2  11   6   48.80   11.40
  -3 -11  -6   -0.90    7.60
   3 -11   6   15.00   10.70
   3  11   6    7.60    7.70
  -3  11  -6   14.50    9.00
   4 -11   6  174.28   25.70
  -4  11  -6  161.98   26.20
   4  11   6  208.58   22.30
   5 -11   6  256.77   33.20
   5  11   6  246.88   26.20
  -5  11  -6  279.67   32.40
   6 -11   6   37.70   16.70
  -6 -11  -6   25.20    9.80
   6  11   6   40.40   10.30
  -6  11  -6   18.30   14.90
   7 -11   6   -2.00   14.80
  -7 -11  -6    0.50    8.70
   7  11   6    4.20    7.70
  -7  11  -6   -5.60   16.60
   8 -11   6   35.10   19.40
  -8  11  -6   40.80   22.20
   8  11   6   34.80    9.80
   8  11   6   36.30    8.60
   9 -11   6   85.59   25.70
  -9  11  -6   95.69   26.90
  10 -11   6   10.90   35.80
 -10  12   6   11.50   22.30
   9 -12  -6   24.00   20.70
  -9  12   6   92.89   24.40
   8 -12  -6   17.90   17.50
  -8 -12   6   40.20    6.70
  -8 -12   6   40.30    6.60
  -8  12   6   29.50   17.90
  -7 -12   6   -3.00    9.20
   7 -12  -6   23.30   16.20
  -7  12   6   12.90   12.90
  -6 -12   6    5.50    7.50
   6 -12  -6   20.80   13.10
  -6  12   6   16.40   12.30
   6  12  -6   12.90    9.00
   5 -12  -6   48.90   15.40
   5  12  -6   66.19   13.50
  -5  12   6   50.79   15.10
   4 -12  -6  -15.90   11.00
  -4 -12   6   -3.40    7.40
  -4  12   6    3.70    9.50
   4  12  -6    4.80    9.50
   3 -12  -6   23.60   12.50
  -3 -12   6   24.00    9.90
  -3  12   6   13.80   10.60
   3  12  -6   19.00   10.40
   2 -12  -6    4.10    9.90
  -2 -12   6  -11.40    7.70
  -2  12   6    2.00    8.70
   2  12  -6    2.10    9.40
   1 -12  -6   17.50   10.40
  -1 -12   6    4.40    8.90
  -1  12   6   -3.80    7.60
   1  12  -6   -9.00    8.60
   0 -12   6  442.96   40.90
   0  12   6  350.66   35.30
   0  12  -6  341.17   36.80
   1 -12   6   12.40   10.70
  -1 -12  -6   15.80    9.70
   1  12   6   11.30    8.70
  -1  12  -6   14.10   11.10
   2 -12   6    8.90   10.00
  -2 -12  -6   19.20   10.10
  -2  12  -6   19.60   11.00
   2  12   6    8.90    8.70
   3 -12   6   -2.20   10.20
  -3 -12  -6   -0.20    8.40
  -3  12  -6    1.10   11.20
   3  12   6   -1.50    8.30
   4 -12   6    2.70   12.20
  -4 -12  -6    9.60    8.70
  -4  12  -6   -3.80   10.60
   4  12   6   11.10    9.20
   5 -12   6    4.90   13.00
  -5  12  -6   17.60   13.60
   5  12   6   17.00    9.10
   6 -12   6   24.30   17.10
  -6 -12  -6    9.20    9.40
  -6  12  -6   21.80   15.50
   6  12   6   14.60    9.20
  -7 -12  -6   47.90   11.50
   7 -12   6   42.10   18.90
  -7  12  -6   27.60   19.30
   7  12   6   22.00    9.60
   8 -12   6   29.80   20.70
   9 -12   6  -20.60   22.80
  -9  12  -6    5.20   24.50
  10 -13  -6    6.20   27.30
   9 -13  -6    9.90   23.10
  -9  13   6   71.09   24.40
  -8 -13   6   29.10    7.80
   8 -13  -6   17.20   19.90
  -8 -13   6   25.10    7.50
  -8  13   6   27.60   17.90
   7 -13  -6   15.00   18.30
  -7 -13   6    8.40    9.00
  -7 -13   6   10.20    8.30
  -7  13   6   13.50   16.30
   6 -13  -6   11.20   15.00
  -6 -13   6   18.30   12.00
  -6  13   6   38.50   16.00
   6  13  -6    3.30    9.40
   5 -13  -6  122.19   22.70
  -5  13   6  115.49   22.50
   5  13  -6  126.29   19.70
   4 -13  -6   93.09   21.00
  -4  13   6  134.59   22.40
   4  13  -6  130.19   19.60
  -3 -13   6    1.80    8.40
   3 -13  -6   -2.30   10.60
   3  13  -6  -10.40    9.70
  -3  13   6   -5.40    9.60
  -2 -13   6    1.80    9.90
   2 -13  -6   13.70   12.30
   2  13  -6   10.00   11.20
  -2  13   6   32.60   11.80
  -1 -13   6   90.19   16.70
   1 -13  -6   49.30   17.10
   1  13  -6   51.89   14.60
  -1  13   6   77.79   16.00
   0 -13   6  142.39   21.90
   0 -13  -6  100.09   20.60
   0  13   6  158.48   22.20
   0  13  -6  115.39   21.40
  -1 -13  -6    3.60    9.70
   1  13   6   13.80    9.50
  -1  13  -6   -1.90   10.20
  -2 -13  -6   97.69   18.00
   2 -13   6   89.99   18.60
   2  13   6   87.59   16.50
  -2  13  -6   76.19   18.40
   3 -13   6   -9.60   12.20
  -3 -13  -6   21.70   10.50
   3  13   6    0.10    8.80
  -3  13  -6    2.80   11.10
   4 -13   6   66.79   17.80
   4  13   6   35.70   11.80
  -4  13  -6   13.30   13.80
   5 -13   6  110.59   22.80
   5  13   6  105.79   17.70
  -5  13  -6  120.89   24.70
   6 -13   6   32.40   18.90
  -6 -13  -6   43.60   11.80
   6  13   6   30.40   11.30
  -6  13  -6   49.20   19.80
   7 -13   6  -10.00   19.90
  -7  13  -6  -10.20   19.60
   8 -13   6   29.50   23.40
  -8  13  -6   15.30   23.50
   9 -13   6   11.10   27.90
  -9  13  -6   37.40   29.90
  -9  14   6    9.80   24.80
   8 -14  -6   92.79   26.10
  -8 -14   6   58.99   10.50
  -8  14   6   42.10   22.60
   7 -14  -6   23.80   20.00
  -7 -14   6   -8.60   10.40
  -7  14   6   -1.00   16.50
   6 -14  -6    7.10   15.60
  -6 -14   6   -3.90   10.00
   6  14  -6   21.10   12.20
  -6  14   6   -6.10   14.40
   5 -14  -6   15.90   16.30
  -5  14   6   64.39   17.00
   5  14  -6   11.00   12.50
   4 -14  -6   12.20   15.00
  -4  14   6   56.79   16.00
   4  14  -6   34.00   14.00
  -3 -14   6   65.69   15.30
   3 -14  -6   83.69   20.90
   3  14  -6   70.59   15.90
  -3  14   6   72.59   18.20
  -2 -14   6   45.20   14.20
   2 -14  -6   57.49   16.00
   2  14  -6   30.60   13.70
  -2  14   6   44.70   14.40
   1 -14  -6   61.09   15.30
  -1 -14   6   72.59   16.40
  -1  14   6   45.80   15.20
   1  14  -6   43.70   15.90
   0 -14  -6   41.40   14.50
   0 -14   6   34.50   13.60
   0  14  -6   31.80   14.50
   0  14   6   12.40   11.90
   1 -14   6  462.35   41.00
  -1 -14  -6  352.16   38.10
  -1  14  -6  343.27   39.60
   1  14   6  335.67   37.40
  -2 -14  -6  352.76   37.00
   2 -14   6  341.87   38.80
   2  14   6  344.57   36.80
  -2  14  -6  392.16   40.60
   3 -14   6   28.00   13.90
  -3 -14  -6   65.79   17.10
  -3  14  -6   17.50   15.80
   3  14   6   45.60   12.90
   4 -14   6    0.80   13.90
   4  14   6    7.70   10.60
  -4  14  -6    9.10   14.30
   5 -14   6   25.10   18.50
  -5  14  -6    9.90   16.70
   5  14   6   10.30   10.50
   6 -14   6    0.40   19.70
  -6  14  -6    5.80   18.10
   7 -14   6   19.10   24.40
  -7  14  -6  -11.70   21.80
   8 -14   6    5.40   26.80
  -8  14  -6  -12.10   26.20
   9 -15  -6   -5.70   30.00
  -8 -15   6    7.90    9.70
   8 -15  -6  -11.40   24.70
  -8  15   6    9.60   23.90
   7 -15  -6   -9.20   22.30
  -7  15   6   58.89   21.60
   6 -15  -6    2.70   18.40
  -6  15   6  -15.10   16.00
   5 -15  -6  -43.80   15.80
  -5  15   6   -3.60   16.00
   5  15  -6   -5.30   12.70
   4 -15  -6   40.60   17.90
  -4 -15   6    0.20   11.30
   4  15  -6   31.80   14.80
   3 -15  -6   10.10   15.60
   3  15  -6   -7.00   12.00
  -3  15   6  -14.40   13.20
   2 -15  -6  349.27   38.10
  -2 -15   6  309.47   35.10
  -2  15   6  271.47   34.60
   2  15  -6  324.07   35.90
   1 -15  -6  373.66   42.70
  -1 -15   6  395.66   41.40
   1  15  -6  390.36   42.60
  -1  15   6  455.45   43.00
   0 -15   6   -6.30   12.40
   0 -15  -6    3.60   12.60
   0  15  -6    3.90   14.70
   0  15   6   -4.20   11.00
  -1 -15  -6    4.00   12.60
   1 -15   6    7.00   14.30
   1  15   6   -3.90   11.80
  -1  15  -6   11.90   14.00
  -2 -15  -6   15.30   13.50
   2 -15   6   -5.70   14.40
  -2  15  -6   -3.50   15.90
   2  15   6   -5.60   11.00
   3 -15   6    3.10   15.70
   3  15   6   -2.10   11.50
  -3  15  -6   14.60   14.10
   4 -15   6    9.00   17.50
  -4 -15  -6    5.60   12.30
   4  15   6    8.90   11.00
  -4  15  -6    5.00   17.90
   5 -15   6   36.80   21.20
  -5  15  -6   33.20   19.70
   6 -15   6  -10.40   21.70
  -6  15  -6    8.20   20.90
   7 -15   6    1.50   24.90
  -7  15  -6  -20.20   24.80
   8 -15   6   26.80   29.50
  -8  15  -6    7.00   30.30
   8 -16  -6   40.70   29.30
  -8 -16   6   13.70   12.30
  -8  16   6  -57.39   25.10
   7 -16  -6   53.59   25.80
  -7  16   6   51.99   23.00
   6 -16  -6    4.40   23.00
  -6  16   6   26.50   20.90
   5 -16  -6   11.30   21.70
  -5  16   6   -9.40   17.90
  -4 -16   6   -4.20   13.50
   4 -16  -6   68.29   20.10
  -4  16   6   27.80   18.80
   4  16  -6   17.70   15.80
  -3 -16   6    5.60   13.50
   3 -16  -6    1.00   15.70
  -3  16   6   -9.40   14.90
   3  16  -6  -12.10   13.50
   2 -16  -6   35.80   18.00
  -2  16   6   43.00   18.80
  -1 -16   6   41.00   14.10
   1 -16  -6   35.30   17.70
   1  16  -6   28.60   17.20
  -1  16   6   16.80   14.10
   0 -16   6   43.50   16.50
   0 -16  -6   85.19   21.00
   0  16  -6   34.70   17.50
   0  16   6   33.60   15.60
   1 -16   6   35.90   14.70
   1  16   6   17.00   14.70
  -1  16  -6    9.10   14.70
  -2 -16  -6   -9.40   16.60
   2 -16   6   55.09   18.40
   2  16   6   52.99   16.70
  -2  16  -6   76.99   20.60
   3 -16   6   63.59   21.30
  -3 -16  -6   89.99   21.30
   3  16   6   79.19   18.70
  -3  16  -6   84.79   22.30
   4 -16   6   11.20   19.90
  -4  16  -6   20.60   20.40
   5 -16   6   -3.60   24.20
  -5  16  -6   -4.90   21.40
   6 -16   6  -16.30   23.00
  -6  16  -6    7.40   24.80
   7 -16   6   75.39   31.90
  -7  16  -6   61.89   31.00
   8 -17  -6   44.50   41.80
   7 -17  -6    2.90   28.70
  -7  17   6   28.20   27.00
   6 -17  -6   37.40   27.30
  -6  17   6    6.50   21.10
   5 -17  -6   -5.30   22.70
  -5  17   6   24.30   19.10
   4 -17  -6   41.10   21.80
  -4  17   6   68.79   23.30
   3 -17  -6   12.80   17.60
  -3 -17   6   -6.50   14.80
  -3  17   6    6.00   18.80
   3  17  -6   10.40   16.90
   2 -17  -6   11.90   16.20
  -2 -17   6    7.10   14.90
   2  17  -6   -2.00   16.10
  -2  17   6  -23.30   16.00
   1 -17  -6  236.08   35.10
  -1  17   6  230.38   33.60
   1  17  -6  246.28   36.10
   0  17  -6   35.00   20.60
   0  17   6   47.60   18.30
  -1 -17  -6   18.00   17.00
   1 -17   6   38.30   19.20
   1  17   6   29.90   16.60
  -1  17  -6   19.90   19.40
   2 -17   6   -0.40   17.40
  -2 -17  -6   25.20   17.90
  -2  17  -6   -0.30   17.80
   2  17   6   22.30   15.50
   3 -17   6   55.09   22.50
  -3  17  -6   31.20   23.50
   4 -17   6  -20.70   20.80
  -4  17  -6   18.70   20.60
   5 -17   6  -15.70   24.30
  -5  17  -6  -33.60   23.60
   6 -17   6   34.70   26.60
  -6  17  -6  -30.90   25.10
   7 -17   6  -41.10   36.20
  -7  17  -6  -75.79   31.20
  -8 -18   6  -14.90   17.20
   7 -18  -6   55.29   35.10
  -7  18   6   18.50   28.80
   6 -18  -6  -12.10   27.60
  -6  18   6   -0.30   26.70
   5 -18  -6   -5.80   23.50
  -5  18   6  -25.60   22.30
   4 -18  -6   20.50   23.00
  -4  18   6   23.70   22.10
   3 -18  -6    1.20   21.70
  -3  18   6  -11.10   21.00
   2 -18  -6  135.39   27.50
  -2 -18   6   62.49   22.80
  -2  18   6  139.49   28.70
  -1 -18   6   34.80   20.20
   1  18  -6   40.70   21.70
   0 -18  -6    9.10   19.60
   0 -18   6   49.70   19.90
   0  18  -6   22.90   21.10
   0  18   6   63.99   19.40
  -1 -18  -6   10.30   19.40
   1  18   6   -3.00   18.30
   2 -18   6  136.19   31.90
  -2  18  -6   80.79   28.90
   3 -18   6   14.80   23.00
  -3  18  -6   -6.90   23.10
   4 -18   6   14.50   25.80
  -4  18  -6   16.40   24.00
   5 -18   6   21.80   28.60
  -5  18  -6   42.20   28.00
   6 -18   6   10.10   34.40
  -6  18  -6   11.10   32.50
   6 -19  -6  -11.20   34.00
  -6  19   6    4.20   32.30
   5 -19  -6  -18.70   30.40
  -5  19   6   44.10   30.80
   4 -19  -6   40.40   29.90
  -4  19   6   71.29   27.50
  -3  19   6    2.10   23.40
   2 -19  -6   38.70   25.50
  -2  19   6   51.19   25.20
   1 -19  -6  -37.90   22.20
  -1  19   6  -20.90   20.40
   0 -19  -6  -13.40   21.40
   0 -19   6  -30.20   21.40
   0  19  -6    0.30   23.90
   0  19   6   -1.10   28.20
   1 -19   6   13.00   22.40
  -1  19  -6   58.49   26.50
   2 -19   6  -16.50   24.00
  -2  19  -6    0.40   23.80
   4 -19   6   46.40   34.20
  -4  19  -6   -2.40   29.90
   5 -19   6   18.70   33.00
  -5  19  -6   45.20   35.50
   6 -19   6   87.09   43.00
  -6  19  -6   13.80   47.80
   6 -20  -6  120.89   46.10
  -6  20   6   16.60   59.29
  -5  20   6   46.30   40.70
   4 -20  -6   14.00   36.90
  -4  20   6   22.20   27.90
   3 -20  -6    6.80   26.70
  -3  20   6  -24.70   27.90
   2 -20  -6   -0.30   25.00
  -2  20   6   26.10   24.80
   2 -20   6   62.39   31.10
  -2  20  -6   51.99   32.10
   3 -20   6   14.70   30.90
  -3  20  -6   53.99   32.20
   4 -20   6  123.09   39.80
  -4  20  -6   40.70   34.70
  -5  20  -6   -6.50   36.90
   5 -21  -6   53.29   42.10
  -5  21   6   95.29   39.90
   4 -21  -6    4.60   37.30
  -4  21   6   15.10   41.30
 -11   0   7    0.70    7.10
  11   0  -7    7.70    6.40
  10   0  -7   -3.40    5.90
 -10   0   7   -5.80    6.90
  -9   0   7    4.20    6.00
   9   0  -7   -3.00    5.70
   8   0  -7    1.00    5.20
  -8   0   7    5.70    5.20
  -7   0   7    0.20    4.50
   7   0  -7    0.90    4.80
   6   0  -7    1.80    4.40
  -6   0   7    4.40    4.30
  -5   0   7    1.20    3.40
   5   0  -7    0.40    3.80
   4   0  -7    2.80    4.00
  -4   0   7    4.90    3.70
  -3   0   7    2.90    3.60
   2   0  -7    3.10    3.70
  -2   0   7    0.30    3.40
  -1   0   7   -0.40    2.60
   1   0  -7   -2.10    3.30
   0   0  -7   26.30    6.10
   0   0   7   19.90    6.00
   1   0   7    2.70    4.20
   2   0   7    2.70    3.90
   2   0   7    0.70    3.50
   3   0   7   -0.50    3.90
   4   0   7   -2.20    4.80
   4   0   7   -3.30    4.70
   5   0   7   -6.00    5.20
   6   0   7    8.90    6.60
   7   0   7    8.10    7.20
   7   0   7    0.50    7.50
   8   0   7    7.40    8.90
   8   0   7   15.70    8.90
   9   0   7   10.60    9.60
   9   0   7    4.10    9.30
  10   0   7    1.30   10.30
  11   0   7  -10.20   11.20
  12   0   7   -1.70   12.80
 -12   1   7   63.19   12.50
  11  -1  -7   89.49   13.20
 -11   1   7   97.49   14.50
 -10  -1   7   42.40    8.00
 -10   1   7   54.39   11.60
  -9  -1   7  103.39   12.70
   9  -1  -7  108.89   14.60
  -9   1   7  112.79   14.70
   9   1  -7  106.39   13.10
   8  -1  -7   34.60    8.90
  -8  -1   7   62.69    8.80
  -8   1   7   27.60    8.40
   8   1  -7   50.89    8.20
   7  -1  -7    2.90    5.30
  -7  -1   7    6.40    4.50
   7   1  -7    8.30    4.90
  -7   1   7    8.70    5.60
  -6  -1   7   88.29   10.70
  -6   1   7   77.69   11.50
   5  -1  -7  109.09   13.70
  -5  -1   7  112.89   12.80
  -5   1   7  131.69   14.00
   5   1  -7  125.59   13.50
  -4  -1   7  353.76   28.70
   4  -1  -7  363.16   29.60
   4   1  -7  300.27   28.20
  -4   1   7  346.57   29.10
  -3  -1   7  206.98   19.60
  -3   1   7  229.68   20.40
  -2  -1   7  394.16   31.70
   2  -1  -7  402.46   32.20
   2   1  -7  333.77   31.30
  -2   1   7  391.86   31.90
   1  -1  -7 4140.69  316.67
  -1  -1   7 4405.36  316.67
   1   1  -7 4490.65  317.07
  -1   1   7 4527.45  316.87
   0  -1   7  301.17   26.80
   0  -1  -7  376.06   30.00
   0   1   7  273.57   26.30
   1  -1   7  206.38   18.80
  -1  -1  -7  161.18   17.30
   1  -1   7  177.18   17.70
   1   1   7  169.98   17.50
   2  -1   7  306.87   25.80
   2  -1   7  293.67   25.40
   2   1   7  229.08   23.90
   3  -1   7   -0.70    4.60
   3  -1   7   -4.70    3.90
   3   1   7    3.40    4.30
   4  -1   7  140.19   16.10
   4  -1   7  109.59   15.80
   4   1   7  118.09   14.70
   4   1   7  133.29   14.60
   5  -1   7   53.79   11.00
   5   1   7   50.39   10.50
   5   1   7   49.99    9.80
   6  -1   7  122.49   18.10
   6  -1   7  158.28   19.20
   6   1   7  158.18   18.00
   6   1   7  149.49   17.60
   7  -1   7   32.60    9.60
   7  -1   7   37.40   10.00
   7   1   7   31.20    9.10
   7   1   7   16.90    7.80
   8  -1   7  218.58   27.60
   8  -1   7  313.37   29.50
   8   1   7  277.17   26.80
   8   1   7  262.07   27.00
   9  -1   7  313.67   30.90
   9  -1   7  316.77   31.50
   9   1   7  304.27   29.70
   9   1   7  248.68   28.40
  10  -1   7   19.30   11.40
  10   1   7    7.80    8.90
  11  -1   7  -13.90   12.70
  11   1   7   -3.30   10.20
  12  -2  -7   -5.50   10.40
 -12   2   7   24.10   12.30
  11  -2  -7    8.00    9.70
 -11   2   7   23.00   11.00
  10  -2  -7  379.76   34.60
 -10   2   7  383.76   35.30
  -9  -2   7  291.17   24.90
   9  -2  -7  283.87   27.90
  -9  -2   7  295.57   24.20
  -9   2   7  280.17   27.60
  -8  -2   7    4.30    4.40
   8  -2  -7    3.50    6.60
  -8   2   7   -4.60    5.80
  -7  -2   7   -3.70    3.90
   7  -2  -7    2.20    5.70
  -7   2   7   -1.10    5.50
   7   2  -7    6.30    4.40
   6  -2  -7   66.29   12.30
  -6  -2   7  108.09   11.50
   6   2  -7  115.19   12.00
  -6   2   7   92.29   13.10
   5  -2  -7   18.40    6.60
  -5  -2   7   34.00    6.70
  -5   2   7   33.70    7.10
   5   2  -7   27.50    6.10
  -4  -2   7 2122.69  145.49
  -4   2   7 1766.12  145.69
   4   2  -7 2061.49  145.79
  -3  -2   7  893.21   67.39
   3  -2  -7  853.31   68.09
  -3   2   7  926.41   68.39
   3   2  -7  872.21   67.79
  -2  -2   7   53.99    8.90
   2  -2  -7   64.59   10.20
  -2   2   7   53.59    9.10
  -1  -2   7  561.94   44.10
  -1  -2   7  503.25   43.20
   1  -2  -7  608.04   44.30
  -1   2   7  513.05   43.50
   0  -2   7   -0.70    2.90
   0  -2  -7    3.00    4.00
   0   2   7    1.60    3.10
   1  -2   7  381.16   32.20
   1  -2   7  443.36   33.20
  -1  -2  -7  363.96   31.50
   1   2   7  318.07   30.80
  -2  -2  -7 1649.54  119.19
   2  -2   7 1587.64  119.79
   2   2   7 1559.04  118.89
   3  -2   7  207.28   21.40
   3   2   7  208.48   20.20
   4   2   7   91.29   12.80
   4   2   7   76.59   12.50
   5  -2   7  193.28   23.00
   5   2   7  243.58   22.10
   5   2   7  223.58   22.20
   6  -2   7  126.79   18.50
   6   2   7  150.58   16.70
   6   2   7  121.09   16.50
   7  -2   7   54.09   15.20
   7   2   7   70.09   11.80
   7   2   7   48.40   11.20
   8  -2   7  502.15   48.10
   8  -2   7  640.94   49.40
   8   2   7  554.04   45.60
   8   2   7  493.45   44.60
   9  -2   7   23.50   12.30
   9  -2   7    6.10   10.50
   9   2   7    7.60    8.60
   9   2   7    6.40    7.90
  10  -2   7   13.80   12.50
  10   2   7   14.20    9.00
  11  -2   7  226.98   28.40
  11   2   7  255.07   26.50
  12  -2   7    4.10   17.10
  13  -3  -7    6.00   13.40
 -13   3   7   -4.60   16.40
  12  -3  -7   53.09   14.80
 -12   3   7   28.50   15.10
  11  -3  -7  102.49   18.10
  10  -3  -7   -5.90    9.00
 -10   3   7    4.40    9.80
  -9  -3   7   21.50    3.80
   9  -3  -7   27.50   10.10
  -9  -3   7   28.00    4.20
  -9   3   7   12.30    9.00
  -8  -3   7   81.79    9.00
  -8  -3   7   68.99    9.20
   8  -3  -7   52.69   12.00
  -8   3   7   83.49   12.60
   7  -3  -7  330.67   31.30
  -7  -3   7  285.87   25.20
  -7  -3   7  310.87   26.00
  -7   3   7  328.87   28.90
   6  -3  -7  222.18   24.70
  -6  -3   7  263.17   22.70
  -6  -3   7  299.57   25.30
  -6   3   7  281.57   25.30
  -5  -3   7  278.37   25.20
  -5  -3   7  288.67   25.60
   5  -3  -7  354.26   28.30
  -5   3   7  299.37   27.20
  -4  -3   7  166.38   16.50
  -4  -3   7  174.48   16.20
  -4   3   7  154.98   16.90
   3  -3  -7    8.60    5.00
  -3  -3   7    1.10    3.30
  -3  -3   7    3.50    3.80
  -3   3   7   -1.60    4.10
  -2  -3   7  335.87   28.50
   2  -3  -7  385.56   29.90
  -2  -3   7  275.67   27.90
  -2   3   7  358.16   29.50
   1  -3  -7 3533.45  243.18
  -1  -3   7 2867.91  242.08
  -1  -3   7 3361.46  243.18
  -1   3   7 3636.54  243.88
   0  -3  -7   58.69    9.60
   0  -3   7   38.70    8.60
   0   3   7   28.50    6.70
  -1  -3  -7   35.20    7.80
   1  -3   7   60.49   10.10
   1   3   7   34.00    7.40
  -2  -3  -7   93.39   11.90
   2  -3   7   77.59   12.50
  -2   3  -7   70.29   11.30
   2   3   7   52.09    9.40
   3  -3   7    6.60    6.20
  -3  -3  -7    9.20    5.00
   3   3   7    5.00    4.80
  -3   3  -7   15.50    6.70
  -4   3  -7  271.57   26.40
   4   3   7  266.17   24.60
   5  -3   7    7.10    8.50
  -5   3  -7   -0.90    5.80
   5   3   7   -6.00    4.70
   5   3   7   -5.40    5.00
   6  -3   7  633.74   49.99
   6   3   7  535.05   46.00
   6   3   7  562.44   46.90
  -6   3  -7  558.64   48.90
   7  -3   7   -1.00    9.00
   7   3   7   -0.40    6.00
  -7   3  -7  -10.70    8.20
   7   3   7    4.40    7.10
   8  -3   7   52.39   15.10
   8   3   7   91.69   14.00
   8   3   7   89.89   13.30
   9  -3   7  264.77   32.90
   9  -3   7  289.97   32.10
   9   3   7  280.77   27.30
   9   3   7  298.47   27.10
  10  -3   7    3.70   13.20
  10   3   7    6.70    7.90
  11  -3   7  -10.80   15.90
  11   3   7   -6.50    6.00
  12  -3   7   21.40   19.50
  13  -4  -7   14.80   25.60
 -13   4   7    3.80   19.00
  12  -4  -7   86.29   18.40
 -12   4   7   76.19   20.10
  11  -4  -7   82.69   17.70
 -11   4   7   98.09   18.50
  10  -4  -7    5.50   11.30
 -10   4   7   12.30   11.10
   9  -4  -7    0.80    9.10
  -9   4   7  -14.00    8.20
   8  -4  -7  180.08   21.70
  -8  -4   7  178.88   16.20
  -8  -4   7  191.58   16.00
  -7  -4   7   17.40    5.00
  -7  -4   7   11.10    5.00
   7  -4  -7   29.80    9.10
  -7   4   7   28.30    8.50
   6  -4  -7  171.28   18.90
  -6  -4   7  175.38   15.20
  -6  -4   7  131.19   15.00
  -6   4   7  137.69   18.60
  -5  -4   7   26.90    6.20
  -5  -4   7   27.20    5.90
  -5   4   7   25.90    7.70
   4  -4  -7   55.89   10.40
  -4  -4   7   44.60    8.10
  -4  -4   7   57.89    9.40
  -4   4   7   64.99   11.20
  -3  -4   7  744.23   57.49
   3  -4  -7  739.73   58.69
  -3  -4   7  717.33   56.99
  -3   4   7  750.82   58.49
   2  -4  -7  134.39   15.10
  -2  -4   7  139.89   14.90
  -2  -4   7  127.99   14.50
  -2   4   7  137.39   15.50
  -1  -4   7   95.29   12.80
   1  -4  -7   71.89   11.10
  -1   4   7   67.39   11.10
   1   4  -7   57.09   10.30
   0  -4   7 1370.16   94.39
   0  -4  -7 1242.48   93.19
   0   4   7 1174.58   92.89
   0   4  -7 1147.99   93.19
   1  -4   7  357.86   35.20
  -1  -4  -7  445.86   35.30
  -1   4  -7  470.55   36.70
   1   4   7  392.56   34.80
   2  -4   7   32.80    8.50
  -2  -4  -7   15.30    6.10
  -2   4  -7   58.39   10.50
   2   4   7   23.80    6.20
   3  -4   7  335.77   30.60
  -3  -4  -7  318.47   28.50
   3   4   7  328.27   28.60
  -3   4  -7  302.47   29.90
   4  -4   7  115.89   17.80
  -4  -4  -7  138.79   15.70
  -4   4  -7  124.09   18.30
   4   4   7  139.99   15.60
  -5   4  -7  119.99   18.00
   5   4   7   81.09   12.80
   5   4   7  102.29   13.50
   6  -4   7   92.29   15.90
   6   4   7   76.49   12.50
   6   4   7   67.39   11.60
  -6   4  -7  106.69   16.60
   7  -4   7  245.18   27.80
   7   4   7  231.88   22.30
   7   4   7  200.98   22.60
  -7   4  -7  217.18   26.90
   8  -4   7    7.90   14.00
  -8   4  -7    1.30   10.30
   8   4   7   -4.60    6.40
   8   4   7   -2.20    7.20
   9  -4   7   25.80   14.40
   9   4   7   16.30    8.10
   9   4   7   17.20    7.80
  10  -4   7    5.20   14.70
  10   4   7    9.00    6.70
  11  -4   7   33.00   18.00
  12  -4   7    8.70   21.90
  13  -5  -7   27.80   20.00
 -13   5   7   34.80   21.00
  12  -5  -7   29.70   16.40
 -12   5   7   -9.40   17.50
  11  -5  -7   14.20   15.00
 -11   5   7   18.40   14.70
  10  -5  -7   94.19   17.80
 -10   5   7   64.59   16.40
   9  -5  -7   -8.10    9.10
  -9   5   7   -9.80    8.90
   8  -5  -7  443.86   41.80
  -8  -5   7  481.75   34.70
  -8  -5   7  465.55   34.50
  -8   5   7  464.05   41.90
  -7  -5   7  685.53   51.59
   7  -5  -7  753.12   57.79
  -7  -5   7  654.63   51.79
  -7   5   7  666.83   56.29
  -6  -5   7  139.99   13.90
   6  -5  -7  109.39   16.90
  -6  -5   7  125.89   13.10
  -6   5   7  133.19   18.00
  -5  -5   7   29.60    6.70
  -5  -5   7   50.79    8.40
   5  -5  -7   24.80    7.90
  -5   5   7   49.10   10.30
  -4  -5   7   17.50    5.50
   4  -5  -7   26.90    7.40
  -4  -5   7   17.20    5.60
  -4   5   7   20.50    6.90
  -3  -5   7  186.88   19.70
   3  -5  -7  188.68   20.80
  -3  -5   7  226.98   20.20
  -3   5   7  228.08   21.60
   2  -5  -7 1018.60   78.29
  -2  -5   7 1016.80   77.09
   2   5  -7  844.92   76.29
  -2   5   7 1162.08   78.59
   1  -5  -7  172.88   17.20
  -1  -5   7  149.59   16.50
  -1   5   7  150.38   16.60
   1   5  -7  116.49   15.70
   0  -5   7   18.70    6.70
   0  -5  -7   17.40    5.90
   0   5   7   17.50    5.90
   0   5  -7   14.90    6.70
   1  -5   7  431.26   37.00
  -1  -5  -7  388.66   35.30
  -1   5  -7  421.96   37.00
   1   5   7  440.06   35.90
  -2  -5  -7   19.60    6.50
   2  -5   7   22.00    8.90
  -2   5  -7   26.30    8.30
   2   5   7   13.00    5.50
   3  -5   7   -1.50    6.10
  -3  -5  -7    5.80    5.50
  -3   5  -7    0.30    5.40
   3   5   7    3.60    4.60
  -4  -5  -7  153.58   16.60
   4  -5   7  116.69   18.60
  -4   5  -7  134.99   19.20
   5  -5   7  349.27   33.50
  -5   5  -7  374.86   34.70
   5   5   7  320.97   29.90
  -6   5  -7   60.49   13.10
   6   5   7   61.09   11.50
   6   5   7   79.79   12.00
   7  -5   7  214.58   25.00
  -7   5  -7  160.18   23.90
   7   5   7  153.78   19.70
   7   5   7  195.38   19.30
   8  -5   7    3.80   11.00
  -8   5  -7   17.90   12.40
   8   5   7    1.30    6.30
   8   5   7    4.90    7.40
   9  -5   7   14.00   13.40
   9   5   7   31.40    8.30
  -9   5  -7   49.20   17.30
   9   5   7   29.50    8.10
  10  -5   7    0.70   16.80
  10   5   7   16.00    6.20
  10   5   7   22.80    8.10
  11  -5   7   61.89   20.40
  11  -6  -7   -4.30   14.90
 -11   6   7  -26.50   15.40
  10  -6  -7  151.58   22.50
 -10   6   7   76.59   18.70
   9  -6  -7   55.29   14.70
   8  -6  -7  202.68   26.80
  -8   6   7  289.87   27.50
   7  -6  -7   -3.40    8.10
  -7  -6   7    0.10    4.20
  -7  -6   7   -2.00    3.60
  -7   6   7    1.70    7.40
  -6  -6   7  139.09   15.10
  -6  -6   7  164.78   16.10
  -6   6   7  171.58   19.40
   5  -6  -7  722.33   57.09
  -5  -6   7  699.33   53.09
  -5   6   7  625.44   55.59
   4  -6  -7  715.53   59.89
  -4  -6   7  756.62   57.79
  -4  -6   7  711.63   57.79
  -4   6   7  771.72   59.99
  -3  -6   7  569.04   45.50
   3  -6  -7  539.25   46.70
  -2  -6   7   10.80    6.00
   2  -6  -7   13.90    6.30
  -2   6   7   15.40    6.60
   2   6  -7    6.30    5.70
  -1  -6   7  208.38   19.30
   1  -6  -7  158.78   17.80
   1   6  -7  164.18   18.20
  -1   6   7  142.79   17.70
   0  -6  -7  182.98   19.50
   0  -6   7  201.88   20.80
   0   6   7  209.48   20.20
   0   6  -7  162.38   19.60
  -1  -6  -7   87.89   12.80
   1  -6   7   62.09   12.40
   1   6   7   68.19   11.20
  -1   6  -7   69.19   12.80
   2  -6   7  735.03   68.49
  -2  -6  -7 1049.59   68.89
  -2   6  -7  876.01   69.79
   2   6   7  812.42   67.29
   3  -6   7   18.20    8.80
  -3  -6  -7   12.00    5.90
   3   6   7   10.80    5.70
  -3   6  -7   17.50    8.60
  -4  -6  -7  121.39   18.10
   4  -6   7  123.39   18.30
   4   6   7  132.29   15.30
  -4   6  -7  115.79   18.60
  -5  -6  -7  318.47   29.10
   5  -6   7  355.86   33.50
   5   6   7  331.57   28.80
  -5   6  -7  268.87   32.00
   6  -6   7   75.49   17.00
   6   6   7  110.89   14.50
   6   6   7  106.19   14.00
  -6   6  -7   77.39   16.30
   7  -6   7   71.99   17.20
  -7   6  -7   75.69   16.20
   7   6   7   82.99   12.60
   7   6   7   97.29   13.80
   8  -6   7   29.80   14.60
  -8   6  -7   33.20   14.60
   8   6   7   55.39    9.50
   9  -6   7   10.10   19.00
   9   6   7   -9.00    6.80
  -9   6  -7    8.10   15.40
   9   6   7    0.50    6.30
  10  -6   7    0.40   15.60
 -10   6  -7   28.60   19.30
  11  -6   7  225.18   33.70
  12  -7  -7   -9.60   19.70
 -12   7   7   54.39   21.40
  11  -7  -7  129.29   23.50
 -11   7   7  134.29   25.60
  10  -7  -7   11.10   14.30
 -10   7   7   -6.80   14.50
   9  -7  -7   91.79   18.90
  -9   7   7  132.59   20.40
   8  -7  -7  405.66   37.10
  -8   7   7  320.27   35.20
  -7  -7   7  246.18   21.20
  -7  -7   7  246.88   21.40
  -7   7   7  260.67   27.30
   6  -7  -7   70.89   15.00
  -6  -7   7  104.09   12.40
  -6  -7   7   79.29   10.60
  -6   7   7   81.89   15.20
  -5  -7   7 1138.69   83.29
  -5  -7   7 1151.38   83.79
   5  -7  -7 1021.10   86.49
  -5   7   7 1076.29   86.49
   4  -7  -7    8.70    7.10
  -4  -7   7   -1.30    5.10
  -4   7   7   -0.30    6.70
   3  -7  -7  227.18   23.30
  -3  -7   7  190.98   20.80
   3   7  -7  225.48   21.40
  -3   7   7  194.28   21.80
  -2  -7   7    2.70    5.20
   2  -7  -7    3.40    5.90
   2   7  -7    3.30    5.50
  -2   7   7    3.70    5.70
   1  -7  -7 1055.39   83.79
  -1  -7   7 1020.20   83.59
   1   7  -7  985.80   83.59
  -1   7   7 1269.97   84.89
   0  -7  -7  915.81   70.79
   0  -7   7  936.01   71.59
   0   7   7  920.31   70.49
   0   7  -7  805.42   70.79
  -1  -7  -7  456.85   38.10
   1  -7   7  432.56   38.90
  -1   7  -7  417.16   39.10
   1   7   7  431.46   37.50
  -2  -7  -7   -1.50    5.30
   2  -7   7    3.60    5.80
   2   7   7    0.80    5.20
  -2   7  -7    3.50    6.80
  -3  -7  -7  174.18   18.20
   3  -7   7  130.39   20.10
  -3   7  -7  155.48   21.50
   3   7   7  133.59   20.10
  -4  -7  -7    0.10    5.60
   4  -7   7   -7.10    7.80
   4   7   7   -3.80    5.40
   5  -7   7   34.80   11.40
  -5  -7  -7   28.50    8.20
   5   7   7   10.00    6.60
  -5   7  -7   21.20   10.60
   6  -7   7   97.69   18.60
   6   7   7  105.09   14.80
  -6   7  -7  117.09   20.20
   7   7   7    6.60    6.50
  -7   7  -7   -1.70   10.70
   7   7   7    9.50    7.70
   8  -7   7   41.80   15.10
   8   7   7   50.09    9.30
  -8   7  -7   20.50   15.20
   8   7   7   38.20    9.50
   9  -7   7   -5.40   14.80
   9   7   7    4.00    6.00
   9   7   7    9.20    6.40
  -9   7  -7    5.80   16.40
  10  -7   7   -1.60   18.20
 -10   7  -7   19.30   20.30
  11  -7   7  -10.90   21.40
 -11   7  -7   18.90   38.90
  12  -8  -7   -9.60   23.10
  11  -8  -7    2.50   19.10
 -11   8   7   18.30   19.40
  10  -8  -7   -9.10   14.30
   9  -8  -7  102.19   19.70
  -9   8   7   41.30   15.60
   8  -8  -7   64.39   17.80
  -8   8   7   74.09   15.60
   7  -8  -7   45.60   14.30
  -7  -8   7   50.39    8.20
  -7  -8   7   55.29    8.20
  -7   8   7   54.79   12.60
  -6  -8   7  262.87   25.10
  -6  -8   7  298.07   25.00
   6  -8  -7  305.77   31.50
  -6   8   7  256.67   29.10
  -5  -8   7  387.86   32.90
   5  -8  -7  394.56   36.80
  -5  -8   7  401.96   33.40
  -5   8   7  342.07   35.30
   4  -8  -7  222.88   31.30
  -4  -8   7  282.47   25.20
  -4   8   7  224.78   26.20
   4   8  -7  278.97   25.50
   3  -8  -7  184.98   22.50
  -3  -8   7  218.98   21.50
  -3   8   7  228.28   23.30
   3   8  -7  179.48   20.90
  -2  -8   7 1752.62  127.29
   2  -8  -7 1655.03  127.99
  -2   8   7 1862.71  128.49
   2   8  -7 1493.85  126.79
  -1  -8   7   11.00    7.10
   1  -8  -7   10.00    6.40
   1   8  -7    6.60    7.10
  -1   8   7    0.00    6.00
   0  -8   7    0.10    6.90
   0  -8  -7    3.00    6.50
   0   8   7   -0.30    5.40
   0   8  -7    9.50    6.90
  -1  -8  -7   95.59   14.60
   1  -8   7   97.99   15.40
  -1   8  -7   98.39   16.00
   1   8   7   64.29   12.20
  -2  -8  -7  137.49   18.60
   2  -8   7  188.08   21.20
  -2   8  -7  164.88   22.60
   2   8   7  136.39   17.30
   3  -8   7  586.84   54.19
  -3  -8  -7  602.04   51.89
   3   8   7  653.53   51.79
  -3   8  -7  692.03   55.79
   4  -8   7    8.50    9.00
  -4  -8  -7   -2.70    6.10
   4   8   7   -5.40    5.20
  -4   8  -7   -2.40    8.30
  -5  -8  -7   78.59   13.00
   5  -8   7   78.19   16.70
  -5   8  -7   57.89   15.60
   5   8   7   67.89   11.80
   6  -8   7   16.30   11.10
  -6  -8  -7    2.60    7.00
  -6   8  -7   14.60   11.10
   6   8   7    1.00    6.40
   7  -8   7   97.29   19.50
   7   8   7   88.89   14.20
   7   8   7  101.49   13.80
  -7   8  -7   81.69   19.00
   8   8   7   79.79   11.20
   8   8   7   72.19   12.90
  -8   8  -7   88.79   21.20
   9  -8   7   28.30   16.70
  -9   8  -7   13.30   18.30
   9   8   7   32.20    8.00
   9   8   7   27.80    6.80
  10  -8   7   -0.30   19.90
 -10   8  -7  -12.50   25.20
  11  -9  -7   21.40   21.70
 -11   9   7   34.10   22.00
  10  -9  -7   10.70   17.70
 -10   9   7    8.20   16.40
   9  -9  -7   34.20   16.90
  -9   9   7   35.90   14.80
  -8  -9   7   15.60    3.10
  -8  -9   7    8.90    3.00
  -8   9   7  -11.30   10.80
   7  -9  -7  183.78   28.70
  -7  -9   7  220.78   20.40
  -7  -9   7  228.48   20.30
  -7   9   7  240.78   27.50
  -6  -9   7  335.77   28.20
   6  -9  -7  322.67   34.00
  -6  -9   7  299.27   27.90
  -6   9   7  300.77   32.80
  -5  -9   7   68.39   11.60
   5  -9  -7   45.30   15.50
  -5   9   7   39.50   11.70
  -4  -9   7  440.16   37.00
   4  -9  -7  354.16   38.60
  -4   9   7  490.95   40.20
   4   9  -7  384.76   36.50
   3  -9  -7  495.55   46.50
  -3  -9   7  511.75   45.50
  -3   9   7  595.54   47.60
   3   9  -7  525.85   45.70
   2  -9  -7   95.89   16.10
  -2  -9   7  132.49   18.10
  -2   9   7  104.39   16.60
   2   9  -7   89.99   15.40
  -1  -9   7  543.45   46.90
   1  -9  -7  583.74   47.80
   1   9  -7  511.75   47.10
  -1   9   7  542.95   46.90
   0  -9  -7   85.59   14.20
   0  -9   7   51.99   12.30
   0   9   7   40.70   11.00
   0   9  -7   29.50    9.70
  -1  -9  -7  377.46   35.20
   1  -9   7  410.96   36.90
   1   9   7  365.76   34.40
  -1   9  -7  375.06   36.70
   2  -9   7  274.77   29.50
  -2  -9  -7  311.37   28.30
   2   9   7  246.38   26.20
  -2   9  -7  259.97   29.00
   3  -9   7   -5.50    9.40
  -3  -9  -7    1.30    6.90
   3   9   7    9.30    6.60
  -3   9  -7   -0.10    8.70
  -4  -9  -7   20.90    8.70
   4  -9   7   18.30   11.10
  -4   9  -7   18.60   10.60
   4   9   7   17.00    8.00
  -5  -9  -7    3.80    6.90
   5  -9   7   12.60   11.40
  -5   9  -7   -7.40    9.10
   5   9   7   10.90    7.10
   6  -9   7  196.48   26.70
  -6   9  -7  182.58   27.40
   6   9   7  158.88   19.40
   7  -9   7  302.47   35.80
  -7   9  -7  321.37   36.70
   8  -9   7   47.20   18.70
   8   9   7   49.80   10.00
   8   9   7   52.29   11.10
  -8   9  -7   65.09   19.40
   9  -9   7   89.39   22.90
   9   9   7   88.29   11.10
   9   9   7   94.29   12.30
  -9   9  -7   75.19   25.10
  10  -9   7   22.70   23.70
 -10   9  -7   36.70   25.10
  11 -10  -7   20.60   22.90
  10 -10  -7   96.19   24.90
 -10  10   7  110.49   25.00
  -9  10   7  132.89   25.00
  -8 -10   7    1.50    3.90
  -8 -10   7    6.00    4.30
   8 -10  -7   14.80   14.50
  -8  10   7   39.40   14.20
  -7 -10   7  366.56   31.70
  -7 -10   7  403.86   31.70
   7 -10  -7  330.97   39.20
  -7  10   7  387.06   39.10
  -6 -10   7  118.99   16.30
   6 -10  -7  158.18   23.80
  -6 -10   7  137.89   16.50
  -6  10   7  144.19   22.30
  -5 -10   7    1.80    6.90
   5 -10  -7    1.80    9.40
   5  10  -7    2.50    7.30
  -5  10   7   -9.10    9.50
   4 -10  -7   -1.20    8.60
  -4 -10   7    2.00    7.50
  -4  10   7   13.10    8.80
   4  10  -7    4.90    7.20
  -3 -10   7   30.30    9.40
   3 -10  -7   37.20   11.90
  -3  10   7   32.10   10.60
   3  10  -7   46.40   11.10
  -2 -10   7    2.80    9.50
   2 -10  -7   24.20   10.00
  -2  10   7    0.20    7.80
   2  10  -7   12.30    8.40
  -1 -10   7  126.69   19.50
   1 -10  -7  141.29   20.60
   1  10  -7  113.09   18.60
  -1  10   7  151.98   20.50
   0 -10  -7   88.69   16.30
   0 -10   7   77.19   16.20
   0  10  -7  118.69   18.40
   0  10   7   81.99   15.00
  -1 -10  -7  184.18   22.10
   1 -10   7  217.18   26.70
  -1  10  -7  169.18   24.70
  -2 -10  -7   62.79   12.70
   2 -10   7   58.19   13.50
  -2  10  -7   65.19   16.10
   2  10   7   56.39   12.10
  -3 -10  -7   48.80   11.90
   3 -10   7   78.69   16.40
   3  10   7   68.69   12.90
  -3  10  -7   85.39   17.70
   4 -10   7    2.40   11.40
  -4 -10  -7   11.00    8.10
   4  10   7    2.40    7.10
  -4  10  -7    7.70   11.50
   5 -10   7    9.40   11.30
  -5  10  -7    7.30   12.60
   5  10   7   -0.80    7.10
  -6 -10  -7   -0.50    8.60
   6 -10   7   14.60   14.50
   6  10   7   16.60    8.50
  -6  10  -7   -3.50   12.60
   7 -10   7   18.30   15.10
  -7 -10  -7   14.60    9.30
  -7  10  -7   28.60   17.10
   7  10   7   19.60    9.20
   8 -10   7   22.30   16.10
   8  10   7    9.10    9.20
   8  10   7   28.20    8.80
  -8  10  -7   21.40   18.80
  -9  10  -7   26.80   22.20
  10 -10   7    1.60   24.90
  10 -11  -7   83.59   26.40
 -10  11   7  114.49   26.00
   9 -11  -7  -36.00   16.20
  -9  11   7   -1.90   16.20
  -8 -11   7  159.78   14.30
   8 -11  -7   69.99   22.90
  -8  11   7  189.38   28.20
  -7 -11   7   -1.20    6.30
   7 -11  -7  -28.10   12.90
  -7 -11   7    3.40    6.80
   6 -11  -7   -0.60   12.00
  -6 -11   7   18.40    8.00
  -6  11   7   23.90   11.60
   5 -11  -7  107.89   20.90
   5  11  -7  133.49   18.30
  -5  11   7  105.89   19.80
   4 -11  -7  176.08   26.60
  -4 -11   7  195.38   22.80
  -4  11   7  209.08   27.30
   4  11  -7  239.38   24.70
  -3 -11   7   34.60   11.00
   3 -11  -7   15.80   10.60
  -3  11   7   27.90   10.40
   3  11  -7   32.70   12.10
  -2 -11   7   -7.50    8.20
   2 -11  -7    6.00    8.90
  -2  11   7   16.50    9.20
   2  11  -7    4.90    8.90
   1 -11  -7  112.99   19.00
   1  11  -7  103.99   18.60
  -1  11   7  129.29   19.70
   0 -11  -7   43.50   12.60
   0 -11   7   44.80   12.90
   0  11  -7   43.40   12.30
   0  11   7   44.70   13.50
   1 -11   7   31.50   12.80
  -1 -11  -7   51.39   12.80
  -1  11  -7   40.50   12.30
   1  11   7   28.00   10.10
   2 -11   7   34.50   12.70
  -2 -11  -7   43.10   12.60
  -2  11  -7   40.50   14.10
   2  11   7   49.60   11.90
  -3 -11  -7  235.18   25.00
   3 -11   7  173.88   26.40
   3  11   7  194.78   23.30
  -3  11  -7  201.08   28.80
   4 -11   7    6.10   11.70
  -4 -11  -7   13.20    8.60
   4  11   7   -6.30    8.20
  -4  11  -7   -3.70   12.80
   5 -11   7   19.90   13.60
   5  11   7   -0.30    7.80
  -5  11  -7   10.50   14.20
   6 -11   7   19.10   14.70
   6  11   7   20.70    9.40
  -6  11  -7   43.20   16.30
  -7 -11  -7   -4.90    9.40
   7  11   7    9.50    8.70
  -7  11  -7   -2.40   17.10
   8 -11   7    0.60   18.70
  -8  11  -7   61.49   22.80
   8  11   7   20.90   10.60
   9 -11   7   13.40   23.00
   9  11   7   12.20    7.20
  -9  11  -7   -4.90   23.80
 -10  12   7  -21.30   21.80
   9 -12  -7   10.30   21.70
  -9  12   7   12.00   18.90
   8 -12  -7   21.20   17.70
  -8 -12   7   -0.70    6.10
  -8 -12   7    4.30    6.30
  -8  12   7   -2.70   15.70
  -7 -12   7   38.30   10.10
   7 -12  -7   31.70   18.80
  -7  12   7   34.70   14.70
   6 -12  -7    4.00   13.40
  -6 -12   7   29.10    9.40
  -6  12   7   13.10   12.10
   5 -12  -7  128.69   21.60
  -5  12   7  101.09   20.70
   5  12  -7  143.49   19.90
  -4 -12   7   11.20    8.40
   4 -12  -7    3.40   11.70
   4  12  -7    2.80    9.30
  -4  12   7    9.50   10.50
  -3 -12   7  650.83   56.69
   3 -12  -7  653.43   59.29
   3  12  -7  699.13   58.19
  -3  12   7  678.03   58.69
  -2 -12   7   -7.70    8.40
   2 -12  -7  -13.30    9.80
  -2  12   7   -8.30    8.70
   2  12  -7   11.90    9.90
   1 -12  -7    9.20   10.40
  -1 -12   7   -7.60    8.70
  -1  12   7    9.80    9.90
   1  12  -7    0.40    9.20
   0 -12  -7   26.20   11.40
   0 -12   7   20.90   11.60
   0  12   7   27.00   11.10
   0  12  -7   18.10   11.40
   1 -12   7  350.76   36.10
  -1 -12  -7  374.06   35.20
  -1  12  -7  330.27   36.60
   1  12   7  305.27   33.30
  -2 -12  -7   67.69   15.80
   2 -12   7   87.69   18.60
   2  12   7   90.29   16.30
  -2  12  -7   71.29   16.90
  -3 -12  -7   78.29   15.00
   3 -12   7   40.40   15.50
  -3  12  -7   75.29   17.40
   3  12   7   86.19   16.00
   4 -12   7  261.97   32.80
   4  12   7  216.38   25.70
  -4  12  -7  228.38   32.60
   5 -12   7   40.80   15.10
  -5  12  -7   77.59   21.00
  -6 -12  -7   14.20   11.40
   6 -12   7   76.79   19.00
   6  12   7   37.00   11.70
  -6  12  -7   57.69   19.10
  -7 -12  -7   87.49   19.20
   7 -12   7   60.39   22.50
  -7  12  -7   48.40   21.90
   8 -12   7   -2.10   21.90
  -8  12  -7  -11.70   20.60
   9 -12   7    6.50   25.90
  -9  12  -7   32.60   25.70
   9  12   7    1.10    8.00
   9 -13  -7   57.49   24.70
  -9  13   7   48.20   23.50
  -8 -13   7   18.40    8.00
   8 -13  -7    6.50   21.20
  -8 -13   7    0.60    7.60
  -8  13   7  -27.30   16.90
  -7 -13   7   64.79   13.00
  -7 -13   7   73.69   17.70
   7 -13  -7   47.50   19.40
  -7  13   7   56.19   19.20
   6 -13  -7   -0.60   14.00
  -6 -13   7    0.40    8.90
  -6  13   7   -3.40   13.30
   6  13  -7   10.60   10.80
   5 -13  -7  142.39   26.10
   5  13  -7  132.89   21.30
  -5  13   7  138.49   24.10
   4 -13  -7   51.69   16.20
  -4 -13   7   -6.70    9.20
   4  13  -7   37.30   12.80
  -4  13   7   17.40   13.50
   3 -13  -7   40.90   15.40
  -3 -13   7   49.50   13.20
  -3  13   7   50.19   16.20
   3  13  -7   66.99   15.80
  -2 -13   7  118.49   18.90
   2 -13  -7   91.39   18.60
   2  13  -7   69.59   15.90
  -2  13   7   84.09   20.00
  -1 -13   7   -1.30   10.80
   1 -13  -7   23.30   10.80
   1  13  -7   19.50   11.40
  -1  13   7   -0.50   10.40
   0 -13  -7    6.00   11.30
   0 -13   7   13.00   11.70
   0  13  -7   20.20   12.00
   0  13   7   27.10   12.30
  -1 -13  -7   25.20   12.60
   1 -13   7   26.20   13.00
  -1  13  -7   24.40   13.50
   1  13   7   14.20   10.10
  -2 -13  -7   10.80   10.90
   2 -13   7   16.70   12.70
   2  13   7    4.10    9.60
  -2  13  -7    0.60   15.60
  -3 -13  -7   47.20   14.10
   3 -13   7   17.80   15.00
   3  13   7   28.50   11.30
  -3  13  -7   35.80   16.70
   4 -13   7   43.30   17.60
  -4  13  -7   62.59   17.00
   4  13   7   16.30   11.20
   5 -13   7   -3.00   14.80
   5  13   7    1.20   10.30
  -5  13  -7    6.10   15.50
  -6 -13  -7   -5.40   10.80
   6 -13   7   -9.20   16.70
   6  13   7  -11.90   10.70
  -6  13  -7   28.70   19.60
   7 -13   7    8.40   20.30
  -7  13  -7    9.80   21.50
   8 -13   7   28.00   24.70
  -8  13  -7  -30.90   22.90
   9 -14  -7    1.60   27.20
  -9  14   7   47.60   26.70
   8 -14  -7   23.90   23.50
  -8 -14   7   24.20    9.90
  -8  14   7   20.80   22.20
  -7 -14   7    5.40   11.00
   7 -14  -7    4.10   20.50
  -7  14   7   -8.30   17.90
   6 -14  -7   61.89   19.80
  -6 -14   7   39.10   13.10
  -6  14   7   50.39   17.60
   6  14  -7   40.50   13.30
   5 -14  -7   14.80   16.30
   5  14  -7   23.00   12.20
  -5  14   7    4.00   12.20
   4 -14  -7   74.89   18.70
   4  14  -7   62.19   19.60
  -4  14   7   96.59   20.90
   3 -14  -7   74.09   18.70
  -3 -14   7   76.39   16.40
   3  14  -7   81.09   17.90
   2 -14  -7  442.26   46.90
  -2 -14   7  483.95   45.70
  -2  14   7  507.75   47.70
   2  14  -7  487.65   47.30
  -1 -14   7   17.30   12.50
   1 -14  -7   24.30   13.50
   1  14  -7   20.20   13.30
  -1  14   7   28.00   14.20
   0 -14  -7   23.00   13.70
   0 -14   7   19.60   13.10
   0  14   7   36.60   12.60
   0  14  -7    7.40   12.00
   1 -14   7   52.29   16.90
  -1 -14  -7   38.20   12.90
   1  14   7   61.69   14.50
  -1  14  -7   53.99   17.60
  -2 -14  -7   43.50   14.80
   2 -14   7   41.50   16.70
   2  14   7   62.79   14.90
  -2  14  -7   39.60   15.80
   3 -14   7   -4.80   14.80
  -3  14  -7   46.30   18.70
   3  14   7   37.90   13.80
   4 -14   7   70.89   20.90
  -4  14  -7   54.79   19.90
   4  14   7   72.49   16.50
   5 -14   7   19.50   18.70
  -5 -14  -7   -4.70   12.40
  -5  14  -7   60.29   21.70
   5  14   7   35.50   13.80
   6 -14   7   -3.70   19.40
  -6  14  -7    1.40   19.20
   7 -14   7   24.30   24.40
  -7  14  -7   18.60   23.20
   8 -14   7   -9.80   26.60
  -8  14  -7    7.60   26.70
   9 -15  -7   59.79   40.50
  -8 -15   7   -4.30   10.80
   8 -15  -7   15.10   27.40
  -8  15   7   35.70   22.50
   7 -15  -7   12.30   24.20
  -7  15   7  -37.80   18.60
   6 -15  -7   -7.10   18.10
  -6  15   7    2.00   19.00
  -5 -15   7    3.70   11.70
   5 -15  -7   29.30   19.30
  -5  15   7   23.10   16.30
   5  15  -7    3.80   13.30
   4 -15  -7   15.00   15.60
  -4 -15   7   20.10   12.50
  -4  15   7   -4.30   14.40
   4  15  -7  -12.10   13.20
   3 -15  -7   49.50   19.50
  -3  15   7   59.39   17.80
  -2 -15   7  106.39   21.40
   2 -15  -7  164.88   26.40
  -2  15   7  113.29   22.00
   2  15  -7  133.99   23.20
   1 -15  -7   -2.80   15.10
  -1 -15   7   14.00   13.20
   1  15  -7   -9.40   13.80
  -1  15   7   -0.50   12.80
   0 -15  -7  169.48   27.30
   0 -15   7  172.58   27.00
   0  15  -7  154.18   26.90
   0  15   7  181.48   27.60
   1 -15   7   71.29   19.50
  -1 -15  -7   94.79   19.60
  -1  15  -7   37.90   17.30
   1  15   7   84.69   19.00
   2 -15   7   40.00   16.50
  -2  15  -7    8.50   15.10
   2  15   7  -19.70   12.80
  -3 -15  -7   -0.30   13.50
   3 -15   7   10.20   14.30
  -3  15  -7    9.70   15.30
   3  15   7   -2.40   12.30
  -4 -15  -7   54.89   17.70
  -4  15  -7   45.80   19.80
   4  15   7   56.79   15.90
   5 -15   7   -4.70   20.50
  -5  15  -7   -7.50   20.30
   6 -15   7   81.89   26.40
  -6  15  -7   79.19   25.40
   7 -15   7   13.20   25.20
  -7  15  -7   28.60   27.50
   8 -15   7   45.20   34.50
   8 -16  -7   46.80   31.20
  -8 -16   7    0.50   13.20
  -8  16   7   -0.80   26.20
   7 -16  -7   39.30   29.00
  -7  16   7   34.30   24.00
   6 -16  -7   22.00   22.80
  -6  16   7  -15.30   19.40
   5 -16  -7   36.50   31.20
  -5  16   7  -22.90   16.40
   4 -16  -7   -0.50   17.50
  -4 -16   7   12.30   13.60
   4  16  -7   18.60   16.20
  -4  16   7   -1.20   15.20
  -3 -16   7   25.80   14.90
   3 -16  -7   27.40   17.40
  -3  16   7   -0.10   15.20
   3  16  -7   43.60   16.70
   2 -16  -7   18.30   15.30
  -2  16   7    5.40   15.10
   2  16  -7   18.90   17.90
   1 -16  -7  -21.90   15.10
   1  16  -7  -28.70   15.10
  -1  16   7   -2.20   14.60
   0 -16   7    9.30   15.60
   0 -16  -7   37.90   17.50
   0  16  -7   19.00   16.30
   0  16   7   12.60   15.00
   1 -16   7  145.29   27.20
  -1  16  -7  189.68   31.30
   1  16   7  174.38   27.40
   2 -16   7   15.50   17.10
  -2 -16  -7   -2.10   14.60
  -2  16  -7    7.70   17.70
   2  16   7   -3.50   13.60
   3 -16   7    7.10   18.50
  -3 -16  -7   31.70   17.50
   3  16   7   -0.50   14.40
  -3  16  -7   -7.00   17.50
   4 -16   7    8.70   19.80
  -4  16  -7   17.30   21.70
   5 -16   7   72.49   27.70
  -5  16  -7  137.09   30.10
   6 -16   7   50.19   28.00
   7 -16   7  -37.90   27.20
  -7  16  -7   42.90   31.10
   7 -17  -7  -23.20   27.30
   6 -17  -7   26.80   27.20
  -6  17   7  -54.59   21.60
   5 -17  -7   -4.20   24.20
  -5  17   7   -1.60   21.20
   4 -17  -7   14.80   22.60
  -4  17   7    9.70   18.60
   3 -17  -7  102.79   25.60
  -3 -17   7  121.69   23.60
  -3  17   7  107.19   25.40
  -2 -17   7   57.49   18.90
   2 -17  -7   12.50   19.70
  -2  17   7   12.20   16.30
   2  17  -7   13.70   17.60
   1 -17  -7  -21.10   16.70
  -1 -17   7   44.10   17.90
   1  17  -7  -21.50   17.60
  -1  17   7   26.60   18.90
   0  17  -7    9.90   20.50
  -1 -17  -7  -16.20   15.70
   1 -17   7   -3.50   15.80
  -1  17  -7   -4.70   19.50
   1  17   7  -40.70   14.80
  -2 -17  -7    0.90   16.80
   2 -17   7   13.90   17.00
   2  17   7   -3.60   15.00
  -2  17  -7   23.10   20.70
   3 -17   7   58.09   23.00
  -3  17  -7   29.40   23.80
   4 -17   7   31.30   25.00
  -4  17  -7    6.00   23.30
   5 -17   7    6.60   27.30
  -5  17  -7   15.40   28.00
   6 -17   7   47.70   30.10
  -6  17  -7    7.80   30.80
   7 -17   7   10.10   44.80
  -8 -18   7    5.80   18.00
   7 -18  -7   44.20   36.30
  -7  18   7   50.49   31.30
   6 -18  -7   26.10   30.00
  -6  18   7   37.70   29.40
   5 -18  -7   24.60   28.60
  -5  18   7  -36.50   23.60
   4 -18  -7   14.80   23.00
  -4  18   7   -8.40   20.70
   3 -18  -7  -31.50   21.80
  -3  18   7   15.60   21.70
  -2  18   7  -23.60   19.60
  -1 -18   7   35.10   20.60
   1  18  -7  -16.30   21.30
  -1  18   7    3.20   19.40
   0 -18  -7   11.80   19.60
   0 -18   7    3.60   19.00
   0  18  -7    8.00   21.30
   0  18   7   10.10   17.40
  -1 -18  -7  104.39   25.00
  -1  18  -7   93.39   28.30
   1  18   7   52.09   24.00
  -2  18  -7   11.00   25.00
   3 -18   7  -14.00   23.90
  -3  18  -7  -61.29   23.60
   4 -18   7   23.10   27.70
  -4  18  -7  -36.50   24.90
   5 -18   7   34.30   31.60
  -5  18  -7   27.20   30.70
   6 -18   7   25.10   32.60
  -6  18  -7  -37.40   31.00
   6 -19  -7  -36.60   35.00
  -6  19   7   26.30   33.70
   5 -19  -7    5.30   31.10
  -5  19   7  -70.39   27.40
   4 -19  -7  -14.90   32.10
  -4  19   7    5.30   24.60
   2 -19  -7   29.20   23.90
  -2  19   7   22.80   24.70
   1 -19  -7   66.19   26.60
  -1  19   7   63.09   24.60
   0 -19   7   51.59   26.10
   1 -19   7    6.00   24.90
  -1  19  -7   11.50   24.00
   2 -19   7   80.79   30.00
  -2  19  -7   19.70   27.60
  -3  19  -7   36.50   26.90
  -4  19  -7   34.00   32.90
   5 -19   7  -31.50   33.70
  -5  19  -7  -38.50   33.20
   4 -20  -7    8.10   31.40
  -4  20   7   57.19   31.70
   3 -20  -7  -39.40   30.40
  -3  20   7   83.09   31.60
   2 -20  -7  -18.30   27.80
   2 -20   7  -10.20   29.90
   3 -20   7   62.09   31.20
  -3  20  -7  -14.30   33.60
   4 -20   7  -23.80   37.40
  -4  20  -7    3.30   36.60
   5 -20   7   -8.70   41.10
  -5  20  -7  -59.39   42.20
   5 -21  -7   -4.10   45.30
  -5  21   7   -5.20   38.50
   4 -21  -7   -0.20   43.60
 -12   0   8    4.80    6.30
 -11   0   8  295.67   28.10
  11   0  -8  325.67   28.00
  10   0  -8  693.63   55.49
 -10   0   8  717.03   57.89
   9   0  -8   10.60    7.00
  -9   0   8    0.10    6.70
  -8   0   8   44.90    8.90
   8   0  -8   43.70    9.00
   7   0  -8    8.20    5.80
  -7   0   8   -1.50    5.10
  -6   0   8  166.58   17.40
   6   0  -8  164.28   17.70
  -5   0   8  386.56   33.70
   5   0  -8  420.06   34.30
  -4   0   8  860.21   64.09
   4   0  -8  789.22   63.99
  -3   0   8 3967.90  287.17
   2   0  -8 3214.78  227.68
  -2   0   8 3033.00  227.08
   1   0  -8 2180.68  156.18
  -1   0   8 2052.79  155.58
   0   0   8   28.80    7.30
   0   0  -8   49.70    9.30
   1   0   8 1759.02  130.99
   2   0   8  744.03   63.29
   2   0   8  884.41   64.69
   4   0   8   -2.10    5.10
   4   0   8    1.80    5.10
   5   0   8  112.59   17.40
   5   0   8  150.28   17.60
   6   0   8   26.60    9.20
   6   0   8   34.20    9.40
   7   0   8    7.40    7.80
   7   0   8    4.00    8.90
   8   0   8   53.79   12.90
   8   0   8   49.50   12.50
   9   0   8   53.39   14.70
   9   0   8   51.59   13.40
  10   0   8   -4.10   16.30
  11   0   8   -6.20   12.90
  12   0   8   -6.80   15.10
  12  -1  -8    9.50   10.20
 -12   1   8    6.80   10.20
 -11  -1   8    0.50    6.10
 -11  -1   8   -0.80    5.80
  11  -1  -8    6.00    8.70
 -11   1   8  -18.30    9.70
 -10  -1   8   44.50    8.80
  10  -1  -8   39.40    9.90
 -10   1   8   32.10   10.20
   9  -1  -8   16.30    7.90
  -9  -1   8   16.60    6.70
  -9   1   8   18.80    8.10
   9   1  -8    1.50    6.30
  -8  -1   8  131.69   15.30
   8  -1  -8  115.39   15.40
   8   1  -8  120.89   14.50
  -8   1   8  104.49   15.20
   7  -1  -8   84.99   13.60
  -7  -1   8  108.09   13.60
   7   1  -8   97.29   13.10
  -7   1   8  123.59   15.20
  -6  -1   8   56.79    9.70
   6  -1  -8   37.00    8.20
   6   1  -8   42.10    8.10
  -6   1   8   53.39    9.50
   5  -1  -8  852.51   65.09
  -5  -1   8  801.42   63.89
   5   1  -8  766.32   63.89
  -5   1   8  909.61   65.09
   4  -1  -8  350.16   31.20
  -4  -1   8  334.07   30.00
  -4   1   8  359.66   30.70
   4   1  -8  378.06   30.80
  -3  -1   8 1037.90   75.49
   3  -1  -8  939.81   75.59
  -3   1   8  980.30   75.69
   2  -1  -8   26.50    7.10
  -2  -1   8   15.50    5.80
   2   1  -8   19.10    6.00
  -2   1   8   21.10    6.10
  -1  -1   8  998.60   71.29
   1  -1  -8  806.72   70.49
  -1   1   8  877.31   70.69
   1   1  -8 1008.10   71.79
   0  -1  -8 3974.30  304.67
   0  -1   8 4771.62  305.77
   0   1   8 3906.61  304.47
  -1  -1  -8  870.91   58.99
   1  -1   8  668.13   57.69
   1  -1   8  722.43   57.69
   1   1   8  672.23   57.19
   2  -1   8    4.20    5.00
   2  -1   8    7.50    5.20
   2   1   8   -0.70    4.30
   3  -1   8   86.09   13.90
   3  -1   8  116.99   16.30
   3   1   8  113.99   13.70
   4  -1   8  426.46   35.20
   4   1   8  359.66   33.90
   4   1   8  370.46   33.80
   5  -1   8   54.69   11.30
   5  -1   8   41.00   10.70
   5   1   8   45.80   10.10
   5   1   8   44.00   10.60
   6  -1   8  308.47   33.30
   6  -1   8  418.26   35.40
   6   1   8  369.76   33.10
   7  -1   8  442.36   41.30
   7  -1   8  511.05   42.40
   7   1   8  410.46   40.10
   7   1   8  462.65   40.20
   8  -1   8  292.27   30.20
   8  -1   8  265.77   29.20
   8   1   8  303.87   29.10
   8   1   8  220.68   27.00
   9  -1   8  161.68   22.80
   9  -1   8  149.09   22.50
   9   1   8  159.18   20.90
   9   1   8  165.28   21.00
  10  -1   8   70.19   16.60
  10   1   8   67.59   14.40
  11  -1   8   13.40   14.40
  11   1   8   16.80   12.00
  12  -1   8    6.10   24.30
 -13   2   8    0.00   17.90
  12  -2  -8   58.39   14.20
 -12   2   8   40.90   14.50
  11  -2  -8   36.10   11.90
 -11   2   8   36.70   13.20
 -10  -2   8  124.89   13.30
 -10  -2   8  132.29   13.30
  10  -2  -8  110.29   16.80
 -10   2   8  112.79   17.70
   9  -2  -8   64.39   12.50
  -9  -2   8   48.20    8.70
  -9  -2   8   51.49   12.60
  -9   2   8   46.40   11.00
   8  -2  -8   96.79   15.10
  -8  -2   8  121.59   13.40
  -8   2   8   95.59   14.70
  -7  -2   8   67.89    9.90
   7  -2  -8   47.30   10.30
  -7   2   8   78.39   14.50
   7   2  -8   65.59   10.00
   6  -2  -8   78.29   13.30
  -6  -2   8  103.69   12.40
  -6   2   8  100.09   14.40
   6   2  -8  119.99   13.20
  -5  -2   8  292.17   25.40
   5  -2  -8  249.97   26.10
   5   2  -8  270.17   25.30
  -5   2   8  340.97   27.20
  -4  -2   8  408.16   34.10
   4   2  -8  427.66   34.90
  -4   2   8  401.86   35.00
   3  -2  -8  124.19   13.90
  -3  -2   8   97.59   12.20
  -3   2   8  105.39   13.10
  -2  -2   8  605.94   50.29
   2  -2  -8  630.34   50.99
  -2   2   8  669.53   51.19
   1  -2  -8  414.46   32.80
  -1  -2   8  355.36   31.80
  -1  -2   8  355.56   32.10
  -1   2   8  366.66   32.40
   0  -2  -8  117.99   14.70
   0  -2   8  129.59   15.00
   0  -2   8  147.99   15.80
   0   2   8  128.49   14.70
  -1  -2  -8  832.52   60.19
   1  -2   8  728.63   59.89
   1  -2   8  780.32   60.49
   1   2   8  686.63   59.09
   2  -2   8  185.68   19.30
   2  -2   8  167.28   18.70
  -2  -2  -8  180.18   18.70
   2   2   8  161.28   18.10
   3  -2   8  872.41   66.39
   3  -2   8  787.82   65.49
   3   2   8  812.42   64.59
   4  -2   8  255.37   26.20
   4   2   8  248.28   24.50
   4   2   8  273.77   25.50
   5  -2   8   81.59   14.30
   5  -2   8   64.79   13.20
   5   2   8   88.29   13.40
   5   2   8   56.69   12.20
   6  -2   8  523.45   46.90
   6  -2   8  574.74   47.70
   6   2   8  516.55   45.40
   6   2   8  534.75   45.10
   7  -2   8   12.70   10.70
   7  -2   8   20.80   10.60
   7   2   8   40.30   10.30
   7   2   8   30.90   10.70
   8  -2   8  568.64   49.80
   8  -2   8  602.64   51.19
   8   2   8  549.54   47.20
   8   2   8  515.05   47.60
   9  -2   8   -0.80   12.40
   9  -2   8  -13.20   11.10
   9   2   8   18.10    9.20
   9   2   8   -0.80    9.20
  10  -2   8   -3.60   13.10
  10   2   8   -6.10   10.10
  11  -2   8   24.90   16.20
  11   2   8    4.00   10.40
  12  -2   8  -19.90   18.30
  13  -3  -8   29.10   15.60
 -13   3   8    7.60   20.00
  12  -3  -8   -9.00   13.40
 -12   3   8   10.70   14.30
  11  -3  -8   18.10   18.30
 -11   3   8   19.50   20.70
  10  -3  -8   18.20   11.00
 -10   3   8   40.30   12.20
  -9  -3   8    8.00    4.90
   9  -3  -8    5.80    8.40
  -9  -3   8   -0.40    4.80
  -9   3   8   15.70    9.00
  -8  -3   8  220.88   20.80
   8  -3  -8  204.98   23.80
  -8  -3   8  238.98   20.30
  -8   3   8  229.88   23.90
   7  -3  -8   -4.10    6.70
  -7  -3   8   10.30    5.70
  -7  -3   8   12.40    5.20
  -7   3   8   17.70    7.70
  -6  -3   8  135.29   15.10
  -6  -3   8  131.39   14.40
   6  -3  -8  119.89   17.40
  -6   3   8  155.68   17.00
  -5  -3   8  304.97   25.80
  -5  -3   8  269.57   26.00
   5  -3  -8  288.17   27.70
  -5   3   8  314.97   27.50
   4  -3  -8  259.37   25.70
  -4  -3   8  266.97   24.80
  -4  -3   8  302.47   24.90
  -4   3   8  267.67   25.70
  -3  -3   8  264.87   26.60
  -3  -3   8  338.67   28.40
   3  -3  -8  343.17   29.00
  -3   3   8  320.17   28.50
  -2  -3   8  338.37   29.60
  -2  -3   8  351.26   30.20
   2  -3  -8  328.07   30.20
  -2   3   8  349.96   30.50
   1  -3  -8   31.10    8.00
  -1  -3   8   46.20    8.90
  -1  -3   8   35.50    8.10
  -1   3   8   32.00    7.80
   0  -3   8 2558.94  205.98
   0  -3   8 3068.19  199.98
   0  -3  -8 2651.43  198.38
   0   3   8 2538.65  198.08
  -1  -3  -8  284.87   26.50
   1   3   8  296.57   26.80
  -2  -3  -8  225.48   21.20
   2  -3   8  233.08   22.60
  -2   3  -8  207.48   21.90
   2   3   8  178.18   20.20
   3  -3   8  251.87   24.20
  -3  -3  -8  222.08   22.20
   3   3   8  214.58   21.50
  -3   3  -8  200.18   22.60
   4  -3   8   70.69   13.20
   4   3   8   93.09   13.20
  -4   3  -8   50.29   12.40
   5   3   8  143.19   18.00
   5   3   8  175.98   18.70
  -5   3  -8  158.98   20.80
   6  -3   8  298.57   31.70
   6   3   8  328.07   29.90
   6   3   8  306.97   29.00
   7  -3   8  325.57   33.30
   7   3   8  297.17   30.60
   7   3   8  346.67   30.60
   8  -3   8   23.80   11.90
   8  -3   8   20.00   19.40
   8   3   8    3.90    7.70
   8   3   8   16.70    9.50
   9  -3   8  133.39   21.70
   9  -3   8   95.19   20.40
   9   3   8  112.09   16.30
  10  -3   8    6.60   15.00
  10   3   8   -0.90    9.30
  11  -3   8   17.10   24.30
  11   3   8   -9.60   13.40
  12  -3   8   -5.50   21.90
  13  -4  -8   37.30   21.00
 -13   4   8   20.20   19.60
  12  -4  -8   28.60   14.70
 -12   4   8    1.30   16.40
  11  -4  -8  171.78   23.60
 -11   4   8  149.39   23.40
  10  -4  -8   97.89   17.00
 -10   4   8   72.09   16.40
  -9  -4   8    8.60    3.70
  -9  -4   8   16.30    4.10
   9  -4  -8   19.20   11.00
  -9   4   8   10.50    9.90
   8  -4  -8    6.50    8.90
  -8  -4   8   10.00    4.80
  -8  -4   8    4.00    5.10
  -8   4   8    2.40    8.10
  -7  -4   8  431.36   32.60
  -7  -4   8  382.16   32.60
   7  -4  -8  392.96   36.40
  -7   4   8  359.26   35.10
  -6  -4   8    5.80    5.10
  -6  -4   8    5.00    4.60
   6  -4  -8   -2.90    6.20
  -6   4   8    5.50    6.20
  -5  -4   8   15.50    5.90
  -5  -4   8   19.70    6.90
  -5   4   8   20.50    7.50
  -4  -4   8   16.10    6.40
   4  -4  -8   20.30    6.70
  -4  -4   8   13.50    5.70
  -4   4   8   21.60    7.20
  -3  -4   8   61.39    9.90
   3  -4  -8   71.59   11.80
  -3  -4   8   70.19   11.10
  -3   4   8   55.59   10.80
  -2  -4   8  175.58   18.20
   2  -4  -8  174.38   19.00
  -2  -4   8  178.78   18.60
  -2   4   8  167.88   20.40
   1  -4  -8   42.20    8.80
  -1  -4   8   34.70    8.40
  -1  -4   8   28.60    8.00
  -1   4   8   42.00    9.30
   0  -4   8    1.90    5.10
   0  -4  -8    1.20    5.00
   0   4  -8    6.10    5.70
   0   4   8    3.60    4.40
  -1  -4  -8   18.90    6.10
   1  -4   8   10.00    5.70
  -1   4  -8   11.10    6.30
   1   4   8   11.90    5.60
  -2  -4  -8  218.68   22.30
   2  -4   8  238.78   24.10
   2   4   8  201.58   22.00
  -2   4  -8  259.27   24.40
   3  -4   8    9.20    7.20
  -3  -4  -8   10.90    6.20
   3   4   8    8.00    5.90
  -3   4  -8   -1.80    5.80
  -4  -4  -8   20.80    7.20
   4  -4   8   32.40    9.90
  -4   4  -8   27.50    9.90
   4   4   8   22.40    8.80
   5  -4   8   19.30    9.40
   5   4   8   35.00    8.50
   5   4   8   28.40   10.70
  -5   4  -8   25.70   10.10
   6  -4   8  320.47   32.30
  -6   4  -8  299.37   31.30
   6   4   8  295.07   28.60
   6   4   8  278.37   27.50
   7  -4   8  333.97   36.10
   7   4   8  374.86   33.50
   7   4   8  350.06   32.40
  -7   4  -8  374.26   36.90
   8  -4   8    4.90   11.70
   8   4   8    1.60    8.40
   9  -4   8   21.70   15.50
   9   4   8   18.30   10.10
   9   4   8   46.70   10.20
  10  -4   8   47.70   17.80
  10   4   8   28.20    9.80
  11  -4   8  151.18   25.20
  11   4   8  106.99   16.40
  13  -5  -8    1.80   21.10
 -13   5   8  -22.80   23.60
  12  -5  -8   28.10   17.70
 -12   5   8   26.30   18.50
  11  -5  -8   76.99   19.40
 -11   5   8   74.79   18.30
  10  -5  -8   93.09   19.40
 -10   5   8   74.39   16.30
   9  -5  -8   47.20   13.50
  -9   5   8   78.79   15.40
  -8  -5   8    8.90    5.20
  -8  -5   8   17.10    5.30
   8  -5  -8   13.60    9.30
  -8   5   8   10.50    9.60
  -7  -5   8   45.80    7.90
  -7  -5   8   41.50    8.40
   7  -5  -8   26.30   10.60
  -7   5   8   56.69   11.80
  -6  -5   8   46.40    8.00
  -6  -5   8   45.70    8.90
  -6   5   8   55.09   11.20
  -5  -5   8    6.60    4.90
   5  -5  -8   18.90    7.80
  -5   5   8    0.30    5.80
   4  -5  -8  251.37   25.50
  -4  -5   8  250.77   23.20
  -4  -5   8  258.97   24.00
  -4   5   8  247.58   24.90
   3  -5  -8   13.40    6.50
  -3  -5   8   27.50    7.00
  -3  -5   8   30.30    7.60
  -3   5   8    8.40    6.10
  -2  -5   8   50.19    9.90
   2  -5  -8   36.80    9.10
  -2   5   8   58.19   10.50
  -1  -5   8    1.90    5.20
   1  -5  -8   -2.90    3.80
   1   5  -8   -2.00    4.80
  -1   5   8   -6.20    4.50
   0  -5  -8    0.60    5.30
   0  -5   8    2.60    5.50
   0   5  -8    3.00    5.10
   0   5   8    5.80    5.50
  -1  -5  -8  129.99   15.50
   1  -5   8  153.98   19.50
   1   5   8   95.29   14.80
  -1   5  -8  137.99   18.30
   2  -5   8  267.17   28.50
  -2  -5  -8  298.57   27.50
   2   5   8  273.57   27.20
  -2   5  -8  352.26   30.20
  -3  -5  -8  427.16   37.00
   3  -5   8  412.36   39.00
  -3   5  -8  428.96   39.60
   3   5   8  438.86   37.10
   4  -5   8   13.20    8.50
  -4  -5  -8    5.00    6.70
  -4   5  -8   21.10    8.40
   4   5   8   12.10    6.20
   5  -5   8  126.99   19.50
   5   5   8   99.19   14.60
  -5   5  -8   87.49   17.50
   6   5   8  422.36   38.80
  -6   5  -8  442.56   42.40
   6   5   8  465.35   38.50
   7  -5   8  111.19   20.10
   7   5   8  127.89   17.60
   7   5   8  105.69   15.70
  -7   5  -8  123.19   21.20
   8  -5   8  -11.80   11.60
   8   5   8   -8.80    6.90
   8   5   8    5.30    9.00
  -8   5  -8   12.00   12.70
   9  -5   8  117.79   22.20
   9   5   8  115.19   16.30
  -9   5  -8  104.19   23.10
   9   5   8  107.99   14.90
  10  -5   8   28.40   16.60
  10   5   8    3.40    8.10
  11  -5   8   62.19   22.40
 -12   6   8   14.20   23.30
  11  -6  -8   61.39   19.00
 -11   6   8   71.29   19.10
  10  -6  -8   -2.60   13.40
 -10   6   8   -4.30   12.90
   9  -6  -8   41.20   14.10
  -9   6   8   47.30   13.90
   8  -6  -8   11.20   10.40
  -8  -6   8   18.60    6.20
  -8  -6   8   21.80    5.50
  -8   6   8   15.70    9.30
  -7  -6   8    8.80    5.10
  -7  -6   8    1.90    5.30
   7  -6  -8   10.60    9.00
  -7   6   8    7.00    8.00
  -6  -6   8   19.60    6.50
  -6  -6   8   18.50    7.00
   6  -6  -8    1.50    7.40
  -6   6   8   28.30   10.10
  -5  -6   8   30.00    7.90
   5  -6  -8   13.90    8.70
  -5  -6   8   31.70    7.50
  -5   6   8   40.10   10.60
  -4  -6   8   12.30    6.80
  -4  -6   8   16.30    6.10
   4  -6  -8   14.40    6.90
  -4   6   8    5.00    7.00
   3  -6  -8  614.54   56.59
  -3  -6   8  647.84   52.39
  -3  -6   8  644.34   52.59
  -3   6   8  676.83   53.79
  -2  -6   8   10.00    6.40
   2  -6  -8    6.90    6.00
  -2   6   8    8.00    5.90
   2   6  -8   -1.30    5.10
   1  -6  -8  381.46   32.90
  -1  -6   8  372.66   32.70
  -1   6   8  305.17   31.50
   1   6  -8  354.76   32.50
   0  -6  -8  667.43   58.59
   0  -6   8  732.63   59.89
   0   6  -8  824.62   61.09
   0   6   8  725.23   59.19
  -1  -6  -8  709.83   53.89
   1  -6   8  727.03   55.39
  -1   6  -8  594.94   54.19
   1   6   8  593.34   52.89
   2  -6   8  149.39   20.10
  -2  -6  -8  129.39   16.90
   2   6   8   92.69   14.60
  -2   6  -8  130.89   18.70
  -3  -6  -8    3.70    5.50
   3  -6   8   10.50    7.90
   3   6   8    1.50    5.80
  -3   6  -8    6.90    7.10
  -4  -6  -8  112.49   15.90
   4  -6   8   83.89   16.60
  -4   6  -8  119.39   19.20
   4   6   8  122.39   16.10
  -5  -6  -8    5.50    6.40
   5  -6   8   15.60    8.90
  -5   6  -8   -3.90    8.20
   5   6   8   -3.40    5.70
   6  -6   8   67.29   15.40
   6   6   8   43.60   10.90
   6   6   8   58.49   10.90
  -6   6  -8   73.19   17.30
   7   6   8   13.40    7.70
   7   6   8   12.10    8.20
  -7   6  -8   21.80   12.90
   8  -6   8    4.30   13.60
  -8   6  -8   36.60   15.10
   8   6   8   21.80    9.10
   8   6   8   38.00   12.00
   9  -6   8   28.90   22.00
  -9   6  -8   24.10   16.90
   9   6   8   34.00    9.30
   9   6   8   21.30    9.40
  10  -6   8   -8.50   17.50
 -10   6  -8   49.70   22.10
  11  -6   8   -3.30   23.60
  12  -7  -8   13.00   20.90
 -12   7   8   26.20   23.70
  11  -7  -8   36.50   19.60
 -11   7   8   31.70   18.30
  10  -7  -8   11.60   14.10
 -10   7   8   21.80   14.60
   9  -7  -8   14.20   14.70
  -9   7   8   38.60   14.60
  -8  -7   8   56.89    7.90
  -8  -7   8   51.49    7.50
   8  -7  -8   73.49   16.20
  -8   7   8   73.99   15.80
  -7  -7   8  256.07   22.70
  -7  -7   8  240.48   23.00
  -7   7   8  289.87   29.00
  -6  -7   8   16.00    6.00
  -6  -7   8   -2.10    5.60
   6  -7  -8   12.90    8.80
  -6   7   8   -1.70    7.70
   5  -7  -8  141.69   20.50
  -5  -7   8  153.58   16.20
  -5  -7   8  107.19   14.90
  -5   7   8   98.89   17.50
   4  -7  -8  148.69   21.90
  -4  -7   8  181.08   19.10
  -4  -7   8  202.38   24.10
  -4   7   8  193.98   26.50
   3  -7  -8   -0.80    5.90
  -3  -7   8    1.00    5.80
   3   7  -8    2.00    5.50
  -3   7   8   -4.00    6.10
  -2  -7   8  749.82   56.09
   2  -7  -8  753.92   56.99
  -2   7   8  679.13   55.89
   2   7  -8  549.65   54.49
  -1  -7   8 1769.22  131.19
   1  -7  -8 1655.03  130.79
   1   7  -8 1678.63  131.19
  -1   7   8 1836.92  131.29
   0  -7  -8  126.49   17.20
   0  -7   8  113.59   16.70
   0   7   8   78.79   14.00
   0   7  -8   82.79   15.30
  -1  -7  -8  739.63   61.19
   1  -7   8  785.42   63.09
  -1   7  -8  746.43   62.79
   1   7   8  762.22   61.29
   2  -7   8  204.18   22.90
  -2  -7  -8  147.39   19.20
   2   7   8  175.78   19.50
  -2   7  -8  204.88   22.80
   3  -7   8  106.39   17.20
  -3   7  -8   77.89   15.70
   3   7   8   66.69   12.40
   4  -7   8   10.20    9.50
  -4  -7  -8   15.10    8.00
  -4   7  -8   14.40   10.00
   4   7   8   -0.70    6.60
   5  -7   8  149.49   22.40
  -5  -7  -8  125.29   17.60
   5   7   8  120.99   16.40
  -5   7  -8  111.39   20.10
   6  -7   8   15.20   11.20
  -6   7  -8   -4.20   10.50
   6   7   8    7.40    7.60
   7   7   8  177.28   21.10
   7   7   8  156.68   19.10
  -7   7  -8  150.78   25.50
   8  -7   8   29.20   15.50
  -8   7  -8   19.00   15.60
   8   7   8   16.70    9.80
   8   7   8   27.60    8.80
   9  -7   8   20.40   17.30
  -9   7  -8   21.70   18.00
   9   7   8   22.70    9.60
  10  -7   8   37.50   22.30
  10   7   8    7.00    5.20
 -10   7  -8   -6.70   20.50
  11  -8  -8   -5.40   18.70
 -11   8   8   10.50   20.10
  10  -8  -8   -6.50   19.10
 -10   8   8  -22.60   14.90
   9  -8  -8   31.00   14.90
  -9   8   8   11.90   13.30
  -8  -8   8    2.00    4.70
  -8  -8   8   17.70    5.10
  -8   8   8   20.80   10.50
  -7  -8   8   13.10    6.60
   7  -8  -8   25.70   11.60
  -7  -8   8   31.80    7.00
  -7   8   8   12.70   10.10
  -6  -8   8   14.90    6.50
   6  -8  -8   29.70   11.50
  -6  -8   8   20.10    7.10
  -6   8   8    4.80    9.30
   5  -8  -8   14.30    9.00
  -5  -8   8   13.40    7.10
  -5  -8   8   23.80    7.50
  -5   8   8   15.50    9.00
   4  -8  -8  773.02   65.99
  -4  -8   8  834.02   64.19
  -4   8   8  788.72   65.59
  -3  -8   8  147.49   18.80
   3  -8  -8   97.89   17.40
  -3   8   8  132.19   18.60
   3   8  -8  134.19   18.10
   2  -8  -8  571.54   51.09
  -2  -8   8  606.54   50.99
   2   8  -8  589.74   50.89
  -2   8   8  640.14   51.49
  -1  -8   8   33.20    9.50
   1  -8  -8   31.00    9.60
   1   8  -8   26.60    8.80
  -1   8   8   34.00    8.80
   0  -8   8   64.49   13.50
   0  -8  -8   83.79   14.60
   0   8   8   63.49   13.10
   0   8  -8   79.19   15.00
  -1  -8  -8   -0.90    6.70
   1  -8   8   -0.70    7.10
  -1   8  -8    0.20    6.40
   1   8   8  -11.90    6.20
   2  -8   8  296.07   30.90
  -2  -8  -8  293.77   29.00
   2   8   8  297.07   36.20
  -2   8  -8  291.27   30.80
  -3  -8  -8  211.18   22.60
   3  -8   8  161.08   23.70
  -3   8  -8  179.18   24.80
   3   8   8  215.68   21.80
  -4  -8  -8  172.48   20.40
   4  -8   8  136.69   22.60
   4   8   8  190.08   20.50
  -4   8  -8  185.18   25.10
   5  -8   8  362.36   40.70
  -5   8  -8  480.25   43.30
   5   8   8  405.56   36.40
   6  -8   8  432.86   42.10
   6   8   8  391.56   35.80
  -6   8  -8  396.96   41.90
   7  -8   8   38.60   16.20
   7   8   8   45.30   12.40
   7   8   8   57.09   16.40
  -7   8  -8   55.59   17.10
   8   8   8   12.40    9.70
   8   8   8    3.60    7.70
  -8   8  -8   26.60   16.20
   9  -8   8   23.50   18.60
  -9   8  -8    7.90   19.60
   9   8   8  -10.30    8.40
 -10   8  -8   21.20   24.00
  11  -9  -8    6.10   21.80
 -11   9   8  -32.00   20.60
  10  -9  -8   28.50   19.00
 -10   9   8   10.20   16.60
   9  -9  -8    5.20   15.80
  -9   9   8   27.00   15.00
  -8  -9   8  181.78   16.30
  -8  -9   8  170.38   16.20
  -8   9   8  145.39   23.30
  -7  -9   8  212.68   21.20
  -7  -9   8  229.78   21.60
   7  -9  -8  213.58   29.40
  -7   9   8  218.68   29.10
  -6  -9   8  139.99   16.40
   6  -9  -8  143.69   22.50
  -6  -9   8  131.89   17.10
  -6   9   8  136.89   21.30
  -5  -9   8  352.16   31.90
   5  -9  -8  285.97   34.10
  -5  -9   8  394.86   32.70
  -5   9   8  336.27   34.80
   4  -9  -8   -3.60    8.10
  -4  -9   8    2.40    6.90
   4   9  -8    7.10    7.70
  -4   9   8   15.30    9.60
   3  -9  -8   10.80    8.20
  -3  -9   8   23.90    9.30
   3   9  -8   24.50    9.40
  -3   9   8   15.50    8.70
  -2  -9   8    4.70    7.70
   2  -9  -8    0.80    7.30
  -2   9   8    7.90    7.60
  -1  -9   8  330.67   31.00
   1  -9  -8  272.87   29.70
  -1   9   8  311.97   30.10
   1   9  -8  265.57   29.50
   0  -9   8  183.18   24.90
   0  -9  -8  202.78   22.60
   0   9   8  196.28   22.10
   0   9  -8  174.58   23.70
   1  -9   8  106.89   17.80
  -1  -9  -8   88.19   16.30
  -1   9  -8  134.69   20.30
   1   9   8   93.49   15.80
   2  -9   8  112.69   18.10
  -2  -9  -8  104.99   16.30
   2   9   8   70.79   13.60
  -2   9  -8   87.49   17.70
  -3  -9  -8   70.99   13.80
   3  -9   8   40.50   12.60
  -3   9  -8   73.49   16.20
   3   9   8   75.19   12.90
  -4  -9  -8  176.28   20.80
   4  -9   8  137.69   24.00
   4   9   8  178.98   19.80
  -4   9  -8  116.19   22.40
   5  -9   8   96.99   18.70
  -5   9  -8  100.79   19.20
   5   9   8   68.39   13.60
   6  -9   8    4.50   12.80
   6   9   8   14.30    8.40
   7  -9   8  101.89   21.60
  -7   9  -8  127.29   23.20
   7   9   8  104.59   15.70
   8  -9   8   31.90   17.90
   8   9   8   12.20    8.60
  -8   9  -8   -6.40   17.10
   8   9   8   18.40   10.70
   9  -9   8   35.70   21.40
  -9   9  -8   18.30   21.30
   9   9   8   20.90    9.90
  10  -9   8   45.00   24.80
 -10   9  -8   68.49   30.30
  11 -10  -8   -6.30   24.20
  10 -10  -8   -3.60   19.70
 -10  10   8   30.80   19.20
  -9  10   8   73.99   19.50
  -8 -10   8   36.90    7.80
   8 -10  -8   48.60   17.90
  -8 -10   8   48.40    8.80
  -8  10   8   43.00   15.10
   7 -10  -8  163.28   26.20
  -7 -10   8  178.98   19.00
  -7 -10   8  172.18   18.30
  -7  10   8  149.88   24.80
  -6 -10   8   11.70    7.50
  -6 -10   8   17.80    7.80
  -6  10   8   30.80   12.30
   5 -10  -8   16.00   10.10
  -5 -10   8    1.00    7.40
  -5  10   8   27.80   11.40
   4 -10  -8  520.35   49.50
  -4 -10   8  579.64   47.70
  -4  10   8  464.55   48.10
   4  10  -8  619.34   48.50
  -3 -10   8  243.98   26.10
   3 -10  -8  242.18   27.70
   3  10  -8  193.08   24.90
  -3  10   8  271.87   27.70
   2 -10  -8    0.10    9.10
  -2 -10   8    4.90    7.80
   2  10  -8   -9.00    7.50
  -2  10   8   17.60    9.40
   1 -10  -8  131.79   19.60
  -1 -10   8  126.39   18.90
  -1  10   8  119.29   18.40
   0 -10  -8   49.60   13.10
   0 -10   8   40.60   12.10
   0  10   8   44.40   12.20
   0  10  -8   64.09   13.90
   1 -10   8   50.09   13.40
   1  10   8   19.80   10.00
  -1  10  -8   60.99   13.80
  -2 -10  -8   17.30    9.70
   2 -10   8    5.10   10.80
  -2  10  -8   20.50   12.40
   2  10   8   35.00   10.40
  -3 -10  -8  203.18   26.20
   3 -10   8  268.77   29.20
   3  10   8  203.88   23.90
  -3  10  -8  247.98   31.80
  -4 -10  -8   59.89   14.40
   4 -10   8   89.69   19.40
   4  10   8  102.39   16.10
  -4  10  -8   93.29   18.80
   5 -10   8   22.90   14.70
   5  10   8   35.00   10.90
  -5  10  -8   41.40   14.10
   6 -10   8   -6.00   13.80
  -6  10  -8   17.70   15.40
   6  10   8   -7.80    9.00
   7 -10   8   27.40   16.00
  -7  10  -8    3.00   15.20
   7  10   8   -2.80    8.50
   8 -10   8   -9.70   16.70
   8  10   8    1.40   10.40
  -8  10  -8    0.80   20.20
   9  10   8   15.60   10.50
  -9  10  -8    5.30   22.10
  10 -11  -8   -3.40   21.40
 -10  11   8    3.20   20.90
   9 -11  -8   24.20   19.50
  -9  11   8   25.00   16.80
  -8 -11   8    9.10    6.80
  -8 -11   8    7.00    6.70
   8 -11  -8   -3.80   16.70
  -8  11   8   27.30   15.00
  -7 -11   8   79.59   12.50
   7 -11  -8   64.69   20.40
  -7  11   8   89.89   19.20
   6 -11  -8   55.49   17.30
  -6 -11   8   29.30    9.40
  -6 -11   8   60.59   12.20
  -6  11   8   39.90   14.30
   5 -11  -8   75.99   16.70
  -5  11   8   44.90   14.30
   5  11  -8   58.29   13.40
  -4 -11   8  203.98   27.20
   4 -11  -8  274.07   31.50
   4  11  -8  306.27   29.90
  -4  11   8  316.37   31.90
  -3 -11   8   11.10    8.90
   3 -11  -8   -8.80   10.10
  -3  11   8    0.20    8.60
   3  11  -8   24.80    9.70
   2 -11  -8  179.78   23.80
  -2 -11   8  171.58   23.30
   2  11  -8  123.69   19.60
  -2  11   8  103.69   19.60
  -1 -11   8   83.69   17.00
   1 -11  -8   85.79   16.40
   1  11  -8   41.90   13.90
  -1  11   8   73.09   14.80
   0 -11  -8   50.09   16.10
   0 -11   8   49.70   14.30
   0  11   8   42.60   11.80
  -1 -11  -8    8.80    8.90
   1 -11   8    3.40   10.80
   1  11   8   14.30    9.40
  -1  11  -8    8.10    9.40
  -2 -11  -8   10.90    9.50
   2 -11   8   10.20   12.00
  -2  11  -8    8.80   10.40
   2  11   8   -4.90    8.10
  -3 -11  -8  141.99   20.70
   3 -11   8   98.19   20.70
  -3  11  -8  201.18   26.40
   3  11   8  111.99   18.30
   4 -11   8  201.18   29.80
  -4  11  -8  182.88   28.30
   4  11   8  214.28   23.50
   5 -11   8   85.99   20.10
  -5  11  -8   61.59   18.60
   5  11   8   91.49   15.80
   6 -11   8   57.19   18.90
   6  11   8   53.69   12.50
  -6  11  -8   66.89   19.10
  -7 -11  -8   50.99   13.40
   7 -11   8   48.50   20.30
   7  11   8   75.99   17.80
  -7  11  -8   54.99   19.90
   8 -11   8   24.70   21.40
  -8  11  -8   39.60   22.60
   8  11   8   24.90   12.10
   9 -11   8    5.10   24.00
  -9  11  -8   18.90   25.40
 -10  12   8   33.20   24.00
   9 -12  -8    5.10   22.30
  -9  12   8   -4.70   18.80
   8 -12  -8   30.10   19.80
  -8 -12   8   11.10    7.70
  -8 -12   8    9.80    8.10
  -7 -12   8   10.80    8.70
  -7 -12   8    1.10    8.70
   7 -12  -8   -0.50   15.20
  -7  12   8   22.60   14.30
   6 -12  -8   -1.10   14.50
  -6  12   8   20.70   12.90
   5 -12  -8   15.70   14.90
  -5  12   8   11.70   12.00
   5  12  -8   22.80   11.90
  -4 -12   8    4.80    9.00
   4 -12  -8   -4.60   10.50
   4  12  -8    9.70   10.30
  -4  12   8   28.90   12.40
   3 -12  -8   58.19   16.40
  -3 -12   8   55.49   13.90
   3  12  -8   51.59   13.50
  -3  12   8   67.89   16.10
   2 -12  -8   21.30   13.40
  -2 -12   8   27.60   11.40
  -2  12   8   -1.40   10.30
   2  12  -8    9.60   10.70
   1 -12  -8    6.80   10.70
  -1 -12   8   15.70   11.10
  -1  12   8   17.40   10.20
   1  12  -8   16.40   11.70
   0 -12   8   -5.60   10.40
   0 -12  -8    7.40    9.60
   0  12  -8   -2.90    9.90
   0  12   8    3.10   10.50
   1 -12   8   86.49   18.80
  -1 -12  -8  106.69   18.00
   1  12   8   84.19   16.20
  -2 -12  -8  521.85   44.20
   2 -12   8  415.96   44.30
   2  12   8  368.06   40.80
  -2  12  -8  525.25   46.90
   3 -12   8   54.69   16.90
  -3 -12  -8   72.49   16.00
  -3  12  -8   74.59   18.90
   3  12   8   96.19   17.20
   4 -12   8    7.30   14.70
   4  12   8    4.20    9.80
  -4  12  -8    1.80   12.20
   5 -12   8   44.80   18.30
   5  12   8   34.90   12.50
  -5  12  -8   51.49   16.80
   6 -12   8   12.50   16.00
  -6 -12  -8  -27.40   10.60
  -6  12  -8   23.30   18.40
   6  12   8   -0.50   10.40
   7 -12   8   40.30   20.50
  -7  12  -8   40.60   21.70
  -8  12  -8   12.90   23.10
   8  12   8    3.00   13.30
   9 -12   8   16.10   29.10
   9  12   8   19.30   11.40
   9 -13  -8   11.60   25.20
  -9  13   8  -10.70   22.10
   8 -13  -8   -6.10   20.40
  -8 -13   8   -2.10    8.60
  -8  13   8   20.30   18.00
  -7 -13   8  103.19   16.50
   7 -13  -8   62.29   23.10
  -7  13   8   95.99   22.30
  -6 -13   8   11.80   10.10
   6 -13  -8   -4.80   16.10
  -6  13   8   15.20   15.30
   5 -13  -8  190.78   30.40
   5  13  -8  208.58   29.70
  -5  13   8  165.68   26.50
  -4 -13   8    0.80   11.30
   4 -13  -8   81.39   18.80
  -4  13   8   66.89   15.60
   4  13  -8   32.10   13.30
  -3 -13   8  474.35   44.10
   3 -13  -8  487.45   47.00
  -3  13   8  445.66   45.80
   3  13  -8  461.75   45.60
  -2 -13   8  123.89   20.70
   2 -13  -8  125.79   22.50
   2  13  -8  107.49   20.90
  -2  13   8  117.89   21.60
   1 -13  -8   10.20   12.20
  -1 -13   8   11.00   11.50
  -1  13   8  -21.40    9.10
   1  13  -8   -6.90   11.00
   0 -13  -8  117.29   22.10
   0 -13   8  141.79   23.20
   0  13  -8  155.48   24.90
   0  13   8  161.08   23.50
  -1 -13  -8   50.09   15.50
   1 -13   8   21.50   14.40
  -1  13  -8   45.00   16.10
   1  13   8   41.30   13.90
   2 -13   8  337.57   37.80
  -2 -13  -8  265.07   32.80
  -2  13  -8  331.87   37.80
   2  13   8  341.37   34.20
   3 -13   8  135.59   25.20
  -3 -13  -8  167.18   23.30
  -3  13  -8  211.68   30.00
   3  13   8  122.19   20.70
   4 -13   8  150.78   27.50
   4  13   8  170.48   24.40
  -4  13  -8  139.49   25.70
  -5 -13  -8    5.60   19.30
   5 -13   8   12.20   15.60
  -5  13  -8   21.80   18.20
   5  13   8   16.70   11.50
   6 -13   8   63.39   21.80
  -6  13  -8   36.10   22.20
   7 -13   8   25.30   23.10
  -7  13  -8   62.69   26.40
   8 -13   8    0.10   26.00
  -8  13  -8   25.50   26.50
   9  13   8   46.60   20.80
   9 -14  -8  -64.69   26.60
  -9  14   8    1.30   25.30
   8 -14  -8    1.30   23.90
  -8 -14   8    6.40   10.30
  -8  14   8   16.60   21.90
   7 -14  -8   -0.50   21.60
  -7 -14   8   -4.40   11.80
  -7  14   8    8.30   17.00
  -6 -14   8   41.80   13.40
   6 -14  -8   30.90   18.90
   6  14  -8   21.00   15.30
  -6  14   8   11.00   15.70
   5 -14  -8   -4.50   15.30
  -5  14   8   -8.80   14.60
   5  14  -8   -8.20   11.80
   4 -14  -8   -7.00   14.90
  -4  14   8   -7.60   12.90
   4  14  -8   16.40   15.30
   3 -14  -8  101.89   32.30
  -3 -14   8  111.49   22.70
  -3  14   8   90.49   19.10
   3  14  -8  115.49   22.40
  -2 -14   8   11.50   12.60
   2 -14  -8    1.40   13.60
  -2  14   8    5.10   12.80
   2  14  -8  -20.80   12.30
   1 -14  -8   13.80   13.20
  -1 -14   8   10.80   12.50
  -1  14   8  -10.60   10.90
   1  14  -8    8.60   13.60
   0 -14   8   69.79   17.80
   0 -14  -8   45.60   16.40
   0  14   8   65.89   16.40
   0  14  -8   69.39   19.30
   1 -14   8  336.37   39.30
  -1 -14  -8  412.26   40.20
   1  14   8  332.27   37.40
  -1  14  -8  349.57   40.90
  -2 -14  -8    0.70   12.70
   2 -14   8   -5.30   13.90
  -2  14  -8   -1.30   15.70
   2  14   8   -1.20   11.00
   3 -14   8  -25.10   16.30
  -3  14  -8  -14.50   15.40
  -4 -14  -8   19.20   13.20
   4 -14   8   32.60   18.80
  -4  14  -8   29.80   17.90
   4  14   8   -0.80   12.20
   5 -14   8    2.90   18.90
  -5 -14  -8    4.70   14.90
  -5  14  -8   35.10   19.20
   6 -14   8  143.99   28.90
  -6  14  -8   81.79   25.50
   7 -14   8  -12.90   25.10
  -7  14  -8   40.50   25.40
   8 -14   8   70.09   30.30
  -8  14  -8   67.99   31.90
  -8 -15   8    3.00   12.30
   8 -15  -8   11.90   27.30
  -8  15   8   -2.50   25.10
  -7 -15   8   16.90   13.60
   7 -15  -8    9.00   24.90
  -7  15   8   -9.70   20.40
   6 -15  -8   19.00   21.00
  -6  15   8   35.40   18.10
  -5 -15   8   83.29   18.70
   5 -15  -8  232.88   33.50
  -5  15   8  139.39   26.40
  -4 -15   8    6.50   12.70
   4 -15  -8    3.80   19.80
  -4  15   8   13.50   16.80
   4  15  -8    5.60   14.60
   3 -15  -8   18.60   16.60
  -3  15   8   53.99   18.60
   3  15  -8   85.19   19.30
   2 -15  -8   30.30   16.10
   2  15  -8   13.10   15.70
  -2  15   8   27.10   14.20
   1 -15  -8  120.99   22.80
  -1 -15   8   71.69   19.90
   1  15  -8  114.39   23.40
  -1  15   8  116.79   22.70
   0 -15  -8   26.80   15.00
   0 -15   8   16.90   15.60
   0  15  -8   35.50   15.90
   0  15   8   11.80   13.10
  -1 -15  -8  144.09   24.90
   1 -15   8  144.19   26.40
  -1  15  -8  156.58   28.00
   1  15   8  128.59   23.10
   2 -15   8   36.80   17.20
  -2  15  -8   50.09   19.60
  -3 -15  -8  159.08   26.20
   3 -15   8  143.09   28.40
  -3  15  -8  160.38   29.60
   3  15   8  160.58   25.60
   4 -15   8   29.90   18.30
  -4 -15  -8   22.00   14.80
  -4  15  -8    6.50   20.10
   5 -15   8   36.70   23.10
   6 -15   8   10.50   24.20
  -6  15  -8   41.60   24.50
   7 -15   8    8.40   28.10
  -7  15  -8   14.00   27.30
  -8 -16   8   -8.10   13.90
   8 -16  -8   -7.00   31.30
  -8  16   8  -26.00   26.70
   7 -16  -8   39.40   28.40
  -7  16   8  -10.70   25.20
   6 -16  -8    6.30   22.50
  -6  16   8  -16.50   26.00
   5 -16  -8  -22.90   18.50
  -5  16   8    9.80   19.60
   4 -16  -8   10.60   20.20
  -4 -16   8   37.30   17.20
  -4  16   8   33.90   20.20
   3 -16  -8   -9.70   16.50
  -3 -16   8  -18.60   13.80
   3  16  -8  -28.10   15.80
  -3  16   8   -0.80   15.80
  -2 -16   8    9.90   16.60
   2 -16  -8   44.90   20.70
   2  16  -8   40.10   19.90
  -2  16   8   36.60   17.80
   1 -16  -8   -9.30   14.90
  -1  16   8   23.30   17.40
   1  16  -8   42.00   19.20
   0 -16  -8   55.99   18.70
   0 -16   8   19.00   16.00
   0  16  -8   56.39   20.50
   0  16   8  101.79   21.70
   1 -16   8   27.30   16.60
  -1  16  -8   -2.10   18.90
   1  16   8   19.70   18.80
  -2 -16  -8   -6.40   15.10
   2 -16   8    9.20   18.10
   2  16   8   -9.70   14.30
  -2  16  -8   10.60   17.50
  -3 -16  -8   -0.60   15.80
   3 -16   8   -4.70   17.80
  -3  16  -8  -15.60   18.20
   4 -16   8   30.40   21.80
  -4  16  -8  -11.90   22.20
   5 -16   8    8.50   25.00
  -5  16  -8   40.20   26.70
  -6  16  -8   44.10   29.10
   7 -16   8   79.79   37.20
  -7  16  -8   62.19   32.50
   7 -17  -8   71.29   42.10
  -7  17   8   92.79   31.00
   6 -17  -8  -12.70   25.00
  -6  17   8   44.80   25.50
   5 -17  -8    7.70   23.20
  -5  17   8    0.20   21.60
   4 -17  -8   47.70   24.60
  -4  17   8   66.59   23.90
   3 -17  -8   22.50   20.60
  -3  17   8    6.60   17.70
  -2 -17   8  -10.10   16.30
   2 -17  -8  -18.40   18.50
  -2  17   8    6.60   16.90
   2  17  -8    7.90   19.00
  -1 -17   8  201.58   32.00
   1  17  -8  206.98   34.40
  -1  17   8  234.08   34.10
   0  17  -8  -24.20   24.00
   0  17   8  -28.00   15.90
  -1 -17  -8    6.50   18.00
   1  17   8    1.30   16.60
  -1  17  -8  -18.40   20.00
   2 -17   8   37.00   19.80
  -2 -17  -8   50.79   21.10
  -2  17  -8   72.49   25.30
   3 -17   8    8.00   22.30
  -3  17  -8  -11.00   21.00
   4 -17   8   18.40   24.60
  -4  17  -8  -29.10   24.60
   5 -17   8    6.30   26.20
  -5  17  -8   18.70   28.70
   6 -17   8  -63.69   30.30
  -6  17  -8   84.99   33.70
  -8 -18   8   38.70   22.50
   7 -18  -8   47.80   39.50
  -7  18   8   46.60   39.90
   6 -18  -8   15.40   33.30
  -6  18   8    2.80   28.20
   5 -18  -8   39.40   31.60
  -5  18   8   40.40   26.40
   4 -18  -8   22.80   27.40
  -4  18   8  -25.70   22.20
   3 -18  -8  112.39   31.00
  -3  18   8   88.89   27.50
  -2  18   8   -1.60   22.70
  -1 -18   8   57.79   21.70
   1 -18  -8   17.90   21.20
  -1  18   8   35.00   21.40
   1  18  -8   51.99   27.90
   0 -18   8   97.39   25.90
   0 -18  -8  115.19   26.70
   0  18  -8   83.99   27.50
   0  18   8   48.50   22.00
   1 -18   8    4.60   20.10
  -1  18  -8  -48.50   22.70
   3 -18   8   12.80   25.10
  -3  18  -8  -14.30   26.10
   4 -18   8   -9.80   27.60
  -4  18  -8  -36.40   28.30
   5 -18   8    9.10   31.80
  -5  18  -8  -18.10   31.10
   6 -18   8   59.79   39.20
  -6  18  -8   51.89   37.60
   6 -19  -8   53.89   37.70
  -6  19   8   10.20   33.50
   5 -19  -8   52.49   35.80
  -5  19   8   11.50   31.90
  -4  19   8   28.30   25.60
   3 -19  -8  -31.40   37.10
  -3  19   8   -5.70   25.60
   2 -19  -8  -30.00   24.40
  -2  19   8    5.70   24.40
   1 -19  -8   44.20   27.40
  -1  19   8   11.70   23.40
   1 -19   8  -30.50   24.80
  -1  19  -8  -27.30   25.10
   2 -19   8    3.00   27.00
  -2  19  -8   -8.70   29.10
   3 -19   8  -14.40   26.60
  -3  19  -8   -9.80   30.70
  -5  19  -8    5.40   37.50
  -5  20   8   25.20   35.10
   4 -20  -8  -55.29   32.90
  -4  20   8   10.80   31.30
   3 -20  -8   -9.10   32.40
  -3  20   8   26.90   29.50
   3 -20   8   -4.50   30.80
  -3  20  -8  -59.79   42.80
   4 -20   8  -39.80   35.30
  -4  20  -8   -4.20   39.20
   5 -20   8   80.39   72.09
   5 -21  -8  -57.29   44.30
 -11   0   9   11.90    9.20
  11   0  -9    2.70    8.70
  10   0  -9    9.20    9.00
  -9   0   9    2.60    7.20
   9   0  -9   -4.60    7.00
  -8   0   9   -4.90    5.70
   8   0  -9    2.50    6.90
  -7   0   9   -0.20    5.90
   7   0  -9    1.00    6.10
  -6   0   9   -1.90    4.80
   6   0  -9   -3.60    5.50
  -5   0   9    6.40    5.70
   5   0  -9   -4.20    4.50
   4   0  -9    3.50    5.20
  -4   0   9   -5.00    4.20
  -3   0   9   -2.10    3.70
   3   0  -9    9.70    5.20
  -2   0   9    1.40    4.20
   2   0  -9    1.50    4.50
  -1   0   9   -0.10    4.20
   1   0  -9    5.40    4.80
   0   0   9    1.30    4.30
   0   0  -9    4.70    5.30
   1   0   9   -4.90    4.80
   2   0   9   -0.70    5.30
   2   0   9   -1.20    4.50
   3   0   9    2.40    5.80
   3   0   9    4.60    6.30
   4   0   9    5.00    6.30
   5   0   9   -6.00    6.80
   5   0   9    1.40    6.80
   6   0   9  -17.80    6.80
   6   0   9   -3.60    7.70
   7   0   9    4.30    9.60
   7   0   9   -9.90    8.00
   8   0   9    3.10   10.50
   8   0   9   10.30   10.10
   9   0   9  -21.30   11.60
   9   0   9  -15.50   11.80
  11   0   9   14.70   15.30
  12   0   9    2.10   17.40
  12  -1  -9    8.70   11.00
 -12   1   9    7.90   11.20
 -11  -1   9    4.20    7.70
 -11  -1   9    9.60    8.40
  11  -1  -9    7.30    9.80
 -11   1   9   15.00   10.70
 -10  -1   9   20.20    7.90
  10  -1  -9    5.90    9.40
 -10   1   9   10.10    9.30
   9  -1  -9  137.89   17.90
  -9  -1   9  131.59   16.10
   9   1  -9  138.39   16.60
  -9   1   9  108.19   16.60
   8  -1  -9    7.40    7.50
  -8  -1   9   -0.20    6.10
   8   1  -9   -5.40    6.20
  -8   1   9    0.60    6.60
  -7  -1   9   17.60    6.80
   7  -1  -9   18.10    8.00
   7   1  -9   27.80    8.00
  -7   1   9   30.00    8.60
   6  -1  -9   20.30    7.70
  -6  -1   9   30.80    9.00
  -6   1   9   41.30    8.80
   6   1  -9   23.10    7.60
   5  -1  -9  358.66   30.70
  -5  -1   9  326.97   29.50
   5   1  -9  330.57   29.90
  -5   1   9  326.07   29.90
  -4  -1   9  180.68   19.30
  -4   1   9  198.28   20.00
   4   1  -9  202.98   20.20
   3  -1  -9   78.09   11.90
  -3  -1   9   81.09   11.70
  -3   1   9   72.19   11.70
   2  -1  -9  772.22   59.59
  -2  -1   9  771.32   59.19
  -2   1   9  782.72   59.49
   2   1  -9  656.93   58.69
   1  -1  -9  745.33   56.19
  -1  -1   9  647.74   55.19
  -1   1   9  661.43   55.29
   1   1  -9  729.53   56.39
   0  -1   9  400.76   35.90
   0  -1  -9  455.85   36.60
   0   1   9  392.86   35.80
   1  -1   9 1568.84  109.39
   1  -1   9 1449.15  109.39
  -1  -1  -9 1310.67  108.49
   1   1   9 1427.46  108.69
   2  -1   9  415.76   34.70
   2  -1   9  395.56   35.00
   2   1   9  346.07   33.50
   3  -1   9   37.70    9.20
   3  -1   9   29.20    8.90
   3   1   9   29.80    8.70
   4  -1   9    1.80    6.40
   4   1   9    7.80    7.00
   4   1   9    8.30    7.60
   5  -1   9    6.50    7.80
   5  -1   9    6.00    7.80
   5   1   9   13.90    8.00
   5   1   9    1.30    7.40
   6  -1   9    7.90    8.70
   6  -1   9   -9.10    8.00
   6   1   9    6.30    9.00
   6   1   9    5.60    7.70
   7  -1   9   -8.00   10.20
   7  -1   9   22.20   10.90
   7   1   9   12.70    9.40
   7   1   9    2.30    9.00
   8  -1   9   99.49   17.30
   8  -1   9   73.29   16.10
   8   1   9   84.19   16.20
   8   1   9   99.49   18.10
   9  -1   9   15.30   21.10
   9  -1   9    5.50   12.20
   9   1   9   15.30   13.30
   9   1   9   12.80   11.80
  10  -1   9   13.10   15.00
  10   1   9    5.20   13.20
  11  -1   9   18.80   17.10
  11   1   9   13.20   14.00
  12  -1   9   33.00   26.70
  12   1   9   11.50   21.30
  13  -2  -9   46.80   21.50
 -13   2   9   33.10   15.20
  12  -2  -9  -21.80   12.10
 -12   2   9   -9.30   13.00
  11  -2  -9   65.69   14.00
 -11  -2   9   43.00    5.50
 -11   2   9   34.30   13.10
  10  -2  -9  905.41   70.79
 -10  -2   9  873.61   66.49
 -10  -2   9  864.91   67.09
 -10   2   9  886.31   70.39
  -9  -2   9   60.89   10.10
   9  -2  -9   43.20   11.50
  -9   2   9   44.30   11.30
   8  -2  -9   21.20    8.80
  -8  -2   9   18.30    7.30
  -8   2   9    3.40    7.60
  -7  -2   9   56.19    9.90
  -7   2   9   37.30   10.00
   7   2  -9   55.19    9.90
  -6  -2   9   36.10    8.20
   6  -2  -9   16.70    7.70
   6   2  -9   15.20    6.60
  -6   2   9   26.10    8.00
   5  -2  -9    9.70    6.40
  -5  -2   9    0.70    4.70
   5   2  -9   -0.20    5.10
  -5   2   9   11.20    6.00
  -4  -2   9   37.20    8.20
   4   2  -9   46.30    8.90
  -4   2   9   49.10    9.60
  -3  -2   9  680.63   55.29
   3  -2  -9  733.53   56.39
  -3   2   9  679.83   55.89
  -2  -2   9   16.30    6.30
   2  -2  -9   35.40    8.50
  -2   2   9   27.90    7.50
  -1  -2   9    0.60    5.10
  -1  -2   9   14.00    5.60
   1  -2  -9    4.90    5.00
  -1   2   9   18.10    6.50
   0  -2  -9  131.89   17.10
   0  -2   9  153.08   17.50
   0  -2   9  164.18   17.90
   0   2   9  171.48   17.80
  -1  -2  -9 1789.02  122.69
   1  -2   9 1524.35  121.99
   1   2   9 1559.54  121.69
  -2  -2  -9  997.10   76.69
   2  -2   9 1077.99   77.69
   2  -2   9 1014.70   77.49
   2   2   9  838.02   75.29
   3  -2   9  161.58   21.40
   3  -2   9  226.58   22.80
   3   2   9  225.68   21.50
   4  -2   9   60.39   12.00
   4  -2   9   93.89   15.20
   4   2   9   65.19   14.30
   4   2   9   65.09   11.80
   5  -2   9    3.00    7.60
   5   2   9    5.00    6.70
   5   2   9   -6.10    6.80
   6  -2   9   -1.60    9.20
   6  -2   9    7.00    9.00
   6   2   9   -1.30    8.10
   6   2   9   13.80    7.50
   7  -2   9  244.98   28.20
   7  -2   9  181.18   26.20
   7   2   9  252.77   26.60
   7   2   9  193.58   24.20
   8  -2   9  -16.90   11.30
   8  -2   9   -7.70   11.40
   8   2   9   -3.20    8.50
   8   2   9   12.30   10.70
   9  -2   9  179.48   26.10
   9   2   9  161.08   23.00
   9   2   9  170.68   24.70
  10  -2   9   16.50   15.40
  10   2   9  -17.20   12.10
  11  -2   9   15.80   17.90
  11   2   9   -0.80   12.60
  13  -3  -9  -10.40   15.70
  12  -3  -9   40.50   15.80
 -12   3   9   53.99   17.60
 -11   3   9   54.19   15.80
 -10  -3   9   85.59   10.60
  10  -3  -9  106.89   17.10
 -10   3   9   83.09   16.50
  -9  -3   9   46.30    9.10
   9  -3  -9   82.19   14.80
  -9   3   9   46.30   12.90
   8  -3  -9  180.98   22.20
  -8  -3   9  217.48   20.00
  -8  -3   9  164.08   18.30
  -8   3   9  186.28   23.20
  -7  -3   9   43.20    9.00
  -7  -3   9   42.20    8.60
   7  -3  -9   38.30   10.20
  -7   3   9   63.39   11.50
  -6  -3   9  227.98   21.50
  -6  -3   9  227.08   22.10
   6  -3  -9  219.28   23.70
  -6   3   9  216.88   23.00
  -5  -3   9  322.17   28.80
  -5  -3   9  373.36   30.30
  -5   3   9  295.57   30.00
  -4  -3   9    5.10    4.70
   4  -3  -9   -3.50    5.20
  -4  -3   9    4.60    5.40
  -4   3   9    7.30    5.90
  -3  -3   9  181.28   17.90
   3  -3  -9  171.48   18.70
  -3  -3   9  164.78   18.20
  -3   3   9  152.48   18.20
  -2  -3   9   63.49   11.00
   2  -3  -9   58.39   11.20
  -2  -3   9   85.69   12.80
  -1  -3   9 1953.00  154.08
   1  -3  -9 1838.42  153.38
  -1  -3   9 2239.08  154.38
  -1   3   9 2283.97  154.88
   0  -3   9 1173.38   82.49
   0  -3   9  936.91   80.49
   0  -3  -9  978.50   80.49
   0   3   9 1099.19   81.29
   1  -3   9   50.69   10.60
  -1  -3  -9   43.20    9.90
   1  -3   9   35.30    9.20
   1   3   9   34.90    8.70
   2  -3   9   -3.10    5.20
  -2  -3  -9   -0.10    5.80
   2  -3   9    2.40    5.80
   2   3   9    1.80    5.20
   3  -3   9   67.79   13.20
  -3  -3  -9  104.19   14.60
   3   3   9   60.49   11.80
   4  -3   9   96.39   16.10
   4   3   9   86.69   14.00
   4   3   9   83.19   13.90
   5   3   9  106.89   17.40
   5   3   9  150.18   18.80
   6  -3   9   81.99   16.40
   6   3   9   60.29   12.70
   6   3   9   90.59   13.90
   7  -3   9  113.89   20.20
   7  -3   9   84.59   18.20
   7   3   9  129.59   18.20
   7   3   9  139.89   19.20
   8  -3   9   -2.30   11.60
   8  -3   9    9.80   12.90
   8   3   9   -1.40    8.50
   8   3   9    0.20    9.60
   9  -3   9  103.39   21.20
   9   3   9   59.69   21.20
  10  -3   9   42.80   17.30
  10   3   9   30.20   13.50
  11  -3   9   -3.60   23.50
  13  -4  -9    0.60   18.70
 -13   4   9  -38.40   19.30
  12  -4  -9   31.50   17.60
 -12   4   9   23.50   18.70
  11  -4  -9   -4.80   12.60
 -11   4   9   23.20   14.20
  10  -4  -9    2.70   11.70
 -10   4   9  -13.10   10.80
  -9  -4   9  109.39   13.40
  -9  -4   9  103.79   12.30
   9  -4  -9  120.69   18.90
  -9   4   9  111.89   18.00
  -8  -4   9    1.10    5.50
  -8  -4   9    8.20    6.00
  -8   4   9   15.40    9.10
  -7  -4   9    1.40    5.40
  -7  -4   9   -4.40    5.50
   7  -4  -9    4.10    8.00
  -7   4   9    6.40    7.20
   6  -4  -9   -1.40    7.20
  -6  -4   9    2.80    5.30
  -6  -4   9   16.90    6.80
  -6   4   9    7.20    7.20
  -5  -4   9  145.99   15.70
  -5  -4   9  144.79   19.70
  -5   4   9  108.69   16.80
  -4  -4   9   43.80    9.00
  -4  -4   9   45.90    8.90
   4  -4  -9   29.00    8.80
  -4   4   9   39.30    9.70
  -3  -4   9    7.70    5.10
   3  -4  -9   -3.40    5.20
  -3  -4   9   14.90    6.50
  -3   4   9    4.20    5.80
  -2  -4   9  150.98   17.20
   2  -4  -9  172.38   22.70
  -2  -4   9  147.89   17.70
  -2   4   9  152.88   17.90
  -1  -4   9  142.99   18.80
  -1  -4   9  201.38   19.80
   1  -4  -9  158.88   19.00
  -1   4   9  214.88   20.50
   0  -4   9   22.40    7.50
   0  -4  -9   32.60    8.30
   0   4   9   13.80    6.40
   1  -4   9   54.79   11.70
  -1  -4  -9   54.99   10.80
   1   4   9   31.70    8.40
  -2  -4  -9   47.20   10.40
   2  -4   9   50.99   12.80
   2   4   9   40.50    9.40
  -2   4  -9   43.50   10.50
   3  -4   9  173.58   23.40
  -3  -4  -9  177.78   20.40
   3   4   9  170.08   20.10
  -3   4  -9  225.58   22.70
   4  -4   9  212.98   25.20
  -4  -4  -9  234.88   24.00
  -4   4  -9  235.88   25.90
   4   4   9  242.68   24.30
   5  -4   9    0.40    8.40
  -5   4  -9   16.00    9.30
   5   4   9    1.00    6.40
   5   4   9    8.30    7.50
   6   4   9  174.98   21.30
  -6   4  -9  170.48   23.80
   6   4   9  210.58   23.10
   7  -4   9   -2.40   10.90
   7   4   9   -0.90    7.60
   7   4   9    2.20    9.00
   8  -4   9   29.50   15.30
   8   4   9   25.00   11.40
   8   4   9   34.30   10.50
   9  -4   9   11.10   15.00
   9   4   9    5.40   10.50
  10  -4   9   11.70   16.90
  10   4   9  -16.50   11.10
  11  -4   9   69.59   23.70
  11   4   9   75.99   13.70
  13  -5  -9   26.40   30.40
  12  -5  -9    3.40   17.50
 -12   5   9  -23.30   18.60
  11  -5  -9   15.90   14.50
 -11   5   9    8.90   15.10
  10  -5  -9   -1.00   12.60
 -10   5   9    1.80   12.20
  -9  -5   9   -7.50    4.80
   9  -5  -9   -1.50   11.10
  -9  -5   9   -3.20    4.50
  -9   5   9    4.40   10.20
  -8  -5   9  104.79   12.80
  -8  -5   9   86.29   12.30
   8  -5  -9  107.09   17.90
  -8   5   9   96.59   16.90
  -7  -5   9  153.68   18.00
   7  -5  -9  174.58   23.00
  -7  -5   9  166.28   17.40
  -7   5   9  157.48   21.70
  -6  -5   9   13.70    5.70
  -6  -5   9   -1.30    6.10
  -6   5   9    2.80    7.50
   5  -5  -9    8.30    7.50
  -5  -5   9   -1.50    5.40
  -5   5   9   17.50    7.90
   4  -5  -9   76.29   14.80
  -4  -5   9  106.09   14.30
  -4  -5   9  112.79   15.30
  -4   5   9  127.39   17.40
  -3  -5   9  114.59   16.40
   3  -5  -9   99.69   16.20
  -3  -5   9  146.39   16.10
  -3   5   9  138.29   20.90
   2  -5  -9   49.80   11.40
  -2  -5   9   47.20   10.80
  -2  -5   9   73.29   12.40
  -2   5   9   72.39   12.60
   1  -5  -9   -3.30    5.30
  -1  -5   9   -2.50    6.00
  -1   5   9    4.90    5.00
   0  -5  -9    4.40    6.10
   0  -5   9   19.40    7.80
   0   5   9   19.80    7.80
   0   5  -9   10.90    6.70
  -1  -5  -9  146.69   18.60
   1  -5   9  207.28   21.40
  -1   5  -9  167.58   19.40
   1   5   9  154.88   18.50
  -2  -5  -9    8.50    6.80
   2  -5   9   -1.10    6.00
  -2   5  -9    4.00    6.50
   2   5   9   -2.50    5.40
   3  -5   9    4.80    8.00
  -3  -5  -9   -0.70    5.90
  -3   5  -9   -0.50    7.00
   3   5   9    6.40    6.50
  -4  -5  -9  248.68   27.20
   4  -5   9  287.27   30.20
  -4   5  -9  300.07   30.40
   4   5   9  308.87   28.40
   5  -5   9  168.58   22.50
  -5   5  -9  109.59   19.90
   5   5   9  150.78   18.10
  -6   5  -9  359.86   38.50
   6   5   9  358.76   34.30
   6   5   9  418.06   36.20
   7  -5   9    8.90   12.50
  -7   5  -9   37.10   13.00
   7   5   9   14.60   10.30
   7   5   9   19.50    9.30
   8  -5   9   22.20   15.20
   8   5   9  -13.40    8.00
  -8   5  -9   -6.00   13.40
   8   5   9   -6.00   10.00
   9  -5   9   16.80   16.20
   9   5   9    8.30   11.20
  10  -5   9   42.10   19.90
  10   5   9   18.50   11.20
  11  -5   9   20.90   22.40
 -12   6   9   48.00   23.50
  11  -6  -9   55.79   19.10
 -11   6   9   63.49   19.30
  10  -6  -9   22.90   15.00
 -10   6   9  -15.30   12.90
  -9  -6   9    1.00    3.80
  -9  -6   9   -5.60    3.70
  -9   6   9   -1.90   11.20
  -8  -6   9   47.10    8.70
  -8  -6   9   46.20    9.20
   8  -6  -9   36.30   13.00
  -8   6   9   82.39   15.70
   7  -6  -9  257.67   34.60
  -7  -6   9  327.27   29.00
  -7  -6   9  332.77   28.20
  -7   6   9  347.37   32.80
  -6  -6   9   -9.00    5.10
  -6  -6   9    4.00    6.30
   6  -6  -9    1.60    8.00
  -6   6   9    7.20    7.30
  -5  -6   9  349.57   30.10
   5  -6  -9  322.97   32.40
  -5  -6   9  340.37   30.50
  -5   6   9  305.57   31.70
  -4  -6   9   13.40    5.90
   4  -6  -9    8.40    7.50
  -4   6   9    0.10    6.40
  -3  -6   9  483.15   39.70
   3  -6  -9  415.36   40.10
  -3  -6   9  414.86   39.30
  -3   6   9  516.65   41.20
   2  -6  -9   23.50    8.80
  -2  -6   9   42.00   10.30
  -2   6   9   59.59   11.70
  -1  -6   9  194.08   22.80
   1  -6  -9  191.78   22.50
  -1   6   9  252.57   23.80
   1   6  -9  224.38   23.60
   0  -6  -9  244.98   25.90
   0  -6   9  290.87   27.80
   0   6   9  236.28   25.70
   0   6  -9  281.27   27.30
  -1  -6  -9   65.39   12.70
   1  -6   9   87.39   15.30
   1   6   9   55.59   11.70
  -1   6  -9   75.99   13.90
  -2  -6  -9   55.59   11.40
   2  -6   9   55.29   12.70
  -2   6  -9   42.90   11.20
   2   6   9   45.50   10.60
   3  -6   9  116.39   18.90
  -3   6  -9  153.88   21.00
   3   6   9  111.39   17.00
  -4  -6  -9    8.10    7.50
   4  -6   9    1.20    8.70
   4   6   9    3.70    6.50
  -5  -6  -9   -0.70    7.90
   5  -6   9   11.30   10.60
  -5   6  -9   20.50   10.50
   5   6   9   13.00    7.10
   6  -6   9  297.87   33.90
   6   6   9  322.37   30.50
   6   6   9  278.87   28.70
  -6   6  -9  271.47   33.20
  -7   6  -9   42.70   15.90
   7   6   9   69.19   14.10
   7   6   9   64.69   13.70
   8  -6   9  -12.40   13.40
   8   6   9   19.10   10.70
   8   6   9    4.50    9.00
  -8   6  -9   12.30   14.70
   9  -6   9   17.30   18.70
  -9   6  -9   28.60   19.60
   9   6   9   21.70   11.40
  10  -6   9   25.70   20.90
  10   6   9   11.60   10.70
  12  -7  -9   12.60   22.70
  11  -7  -9   59.99   22.60
 -11   7   9   78.79   23.80
  10  -7  -9   47.80   19.20
 -10   7   9   36.80   16.20
   9  -7  -9   20.50   13.80
  -9   7   9    9.10   12.70
   8  -7  -9  488.55   46.30
  -8  -7   9  484.95   38.70
  -8  -7   9  468.85   42.40
  -8   7   9  467.25   45.10
  -7  -7   9  127.29   15.70
  -7  -7   9  124.69   15.20
  -7   7   9  115.89   20.20
  -6  -7   9   -0.50    5.60
   6  -7  -9   -2.20    8.60
  -6  -7   9    3.40    6.30
  -6   7   9   -2.50    8.40
   5  -7  -9  302.47   30.20
  -5  -7   9  267.27   25.50
  -5  -7   9  253.87   26.20
  -5   7   9  262.47   28.30
  -4  -7   9   29.00    9.20
  -4  -7   9   11.90    7.50
  -4   7   9   10.60    8.00
  -3  -7   9   -0.80    6.70
   3  -7  -9    6.20    6.80
  -3   7   9    2.60    6.40
  -2  -7   9  249.78   24.70
   2  -7  -9  181.08   23.60
  -2   7   9  275.67   25.60
   2   7  -9  205.98   24.10
  -1  -7   9  183.28   23.40
   1  -7  -9  156.68   21.70
  -1   7   9  193.38   21.40
   1   7  -9  175.38   20.90
   0  -7  -9   59.79   12.60
   0  -7   9   75.19   14.40
   0   7   9   78.79   13.50
   0   7  -9   53.19   12.40
  -1  -7  -9  253.47   24.90
   1  -7   9  200.28   24.90
   1   7   9  225.38   24.10
  -1   7  -9  225.48   25.50
  -2  -7  -9   82.99   14.10
   2  -7   9   64.59   14.80
  -2   7  -9   67.09   14.50
   2   7   9   65.89   12.80
   3  -7   9   99.69   17.60
  -3  -7  -9  114.29   16.90
  -3   7  -9  125.49   20.50
   3   7   9   87.29   15.60
  -4  -7  -9   14.10    8.70
   4  -7   9    7.20   10.30
  -4   7  -9   -1.10    9.40
   4   7   9    0.30    7.10
   5  -7   9  122.59   21.10
  -5   7  -9  125.09   20.80
   5   7   9  124.09   17.90
   6  -7   9   32.90   14.20
  -6   7  -9   55.29   15.00
   6   7   9   42.60   11.00
   7  -7   9   16.40   13.50
   7   7   9   -6.60    7.90
   7   7   9    6.60    9.90
  -7   7  -9   10.00   12.70
   8  -7   9   88.09   21.80
  -8   7  -9  125.39   24.40
   8   7   9   97.09   15.40
   9  -7   9   41.40   20.30
  -9   7  -9   49.40   21.60
   9   7   9   40.50   12.60
  10  -7   9  -10.10   21.20
 -10   7  -9   -2.90   22.90
  10   7   9    6.50   10.00
  11  -8  -9    5.80   20.90
 -11   8   9  -12.40   19.40
 -10   8   9   13.60   16.10
   9  -8  -9    9.00   14.70
  -9   8   9   57.49   16.00
  -8  -8   9   11.80    6.50
  -8  -8   9   19.60    6.90
  -8   8   9    5.00   11.80
   7  -8  -9   73.89   17.00
  -7  -8   9   75.19   12.80
  -7  -8   9   83.59   12.20
  -7   8   9   79.89   16.20
  -6  -8   9   21.80    7.70
   6  -8  -9    5.70    9.90
  -6  -8   9   26.10    8.10
  -6   8   9    0.10    9.30
   5  -8  -9   10.90    8.60
  -5  -8   9    8.10    6.80
  -5  -8   9    4.70    8.10
  -5   8   9   15.90    8.50
   4  -8  -9   47.40   12.90
  -4  -8   9   80.09   13.80
  -4  -8   9   75.49   13.20
  -4   8   9   79.39   14.70
  -3  -8   9   40.10   10.70
   3  -8  -9   17.00    8.90
  -3   8   9   23.50    9.80
   3   8  -9   26.60    9.10
  -2  -8   9  102.79   16.90
   2  -8  -9   61.79   13.50
  -2   8   9  131.99   18.00
   2   8  -9   79.99   14.30
   1  -8  -9  833.52   63.59
  -1  -8   9  723.53   62.79
   1   8  -9  720.73   63.19
  -1   8   9  761.52   62.59
   0  -8   9   42.10   11.40
   0  -8  -9   20.90    9.30
   0   8  -9   40.40   11.40
   0   8   9   36.90   10.70
   1  -8   9  260.97   30.60
  -1  -8  -9  296.27   29.40
   1   8   9  297.97   29.40
  -1   8  -9  317.37   31.30
   2  -8   9  464.05   38.90
  -2   8  -9  396.06   37.90
   2   8   9  305.67   33.80
  -3  -8  -9   61.79   13.40
   3  -8   9   63.99   15.90
  -3   8  -9   89.79   16.90
   3   8   9   66.79   13.20
  -4  -8  -9    1.40    8.10
   4  -8   9    7.10    9.90
  -4   8  -9   -8.80    9.50
   4   8   9   -7.70    6.70
  -5  -8  -9   -5.80    8.20
  -5   8  -9   -6.80   10.50
   5   8   9    7.90    8.60
   6  -8   9   -7.90   11.80
   6   8   9    1.00    8.10
  -6   8  -9   -5.00   12.60
   7  -8   9   -5.80   13.70
   7   8   9    0.50    8.80
  -7   8  -9    2.40   14.80
   7   8   9    3.00    9.90
   8   8   9   -2.30   10.50
  -8   8  -9    7.00   17.40
   9  -8   9    8.60   19.70
   9   8   9   10.80   11.50
  -9   8  -9    9.70   20.50
  10   8   9   -6.70    7.90
 -10   8  -9    2.10   28.20
  11  -9  -9   11.60   23.20
 -11   9   9  -18.10   20.10
  10  -9  -9   28.80   20.10
 -10   9   9   -7.50   16.80
   9  -9  -9  -14.70   14.50
  -9   9   9   11.90   14.80
  -8  -9   9    7.30    6.70
  -8  -9   9   13.70    7.40
   8  -9  -9    9.10   13.70
  -8   9   9    3.50   12.10
   7  -9  -9    2.90   12.90
  -7  -9   9    2.80    7.00
  -7  -9   9    4.30    7.80
  -7   9   9    8.50   11.20
  -6  -9   9    0.40    6.80
  -6  -9   9    8.30    8.00
   6  -9  -9    3.30   11.60
  -6   9   9    7.80   11.50
  -5  -9   9   24.50   10.40
  -5  -9   9   22.30    9.00
   5  -9  -9   28.80   12.00
  -5   9   9   39.60   12.20
  -4  -9   9   -0.80    7.70
   4  -9  -9    7.80    8.90
  -4   9   9    0.40    9.00
   3  -9  -9   56.89   14.50
  -3  -9   9   75.89   14.40
  -3   9   9  112.39   17.40
   3   9  -9   90.09   16.00
   2  -9  -9   61.09   13.10
  -2  -9   9   61.99   18.10
   2   9  -9   42.90   11.50
  -2   9   9   34.50   10.60
  -1  -9   9   -5.90    8.00
   1  -9  -9   -8.50    8.30
  -1   9   9   -8.10    7.80
   1   9  -9    2.30    8.20
   0  -9  -9   48.00   12.90
   0  -9   9   28.60   11.80
   0   9  -9   41.70   12.90
   0   9   9   42.60   11.60
  -1  -9  -9  207.58   25.10
   1  -9   9  262.77   28.40
  -1   9  -9  234.58   27.10
  -2  -9  -9   -1.40    7.60
   2  -9   9   17.70   11.20
  -2   9  -9   -3.10    8.70
   2   9   9   -2.40    7.50
   3  -9   9  188.88   26.90
  -3  -9  -9  184.08   22.80
   3   9   9  195.28   22.70
  -3   9  -9  171.28   25.80
  -4  -9  -9   17.60    9.80
   4  -9   9   39.50   13.30
  -4   9  -9    7.70   12.40
   4   9   9   28.80   10.30
   5  -9   9   11.30   12.70
  -5   9  -9  -13.30   10.70
   5   9   9   14.70    9.00
   6  -9   9   46.20   17.40
  -6   9  -9   29.30   16.70
   7  -9   9  -17.10   14.40
  -7   9  -9    9.80   15.20
   7   9   9    3.20    8.80
   8  -9   9   18.20   18.90
  -8   9  -9   32.30   20.00
   8   9   9   22.40   12.20
   9   9   9   86.79   16.00
  -9   9  -9  103.69   28.00
  10 -10  -9  -28.90   19.50
 -10  10   9    9.10   18.70
  -9  10   9   16.00   17.30
  -8 -10   9   54.89    9.30
  -8 -10   9   20.60    8.20
   8 -10  -9   54.69   17.70
  -8  10   9   39.30   15.30
  -7 -10   9    2.40    7.40
   7 -10  -9  -16.10   12.50
  -7 -10   9    1.00    8.00
  -7  10   9   25.10   13.80
  -6 -10   9  267.27   24.90
   6 -10  -9  246.08   32.20
  -6  10   9  175.18   28.00
  -5 -10   9   -2.30    7.70
   5 -10  -9    5.60   11.80
  -5 -10   9   -3.80    9.90
  -5  10   9   -9.30   10.20
  -4 -10   9    9.00    9.60
   4 -10  -9   27.30   12.70
   4  10  -9   11.80    9.40
  -4  10   9   19.40   11.30
   3 -10  -9   20.60   11.00
  -3 -10   9   11.60    8.60
  -3  10   9   -0.20    9.10
   3  10  -9   19.60    9.60
  -2 -10   9    9.00    9.50
   2 -10  -9    4.80   10.00
   2  10  -9   10.80    9.80
  -2  10   9    8.40    9.20
   1 -10  -9  153.08   23.00
   1  10  -9  129.09   21.30
  -1  10   9  192.58   22.30
   0 -10  -9    8.30    8.50
   0 -10   9    9.00    9.70
   0  10  -9  -13.70    9.00
   0  10   9    6.00    8.00
  -1 -10  -9  327.27   33.00
   1 -10   9  228.58   31.70
  -1  10  -9  372.16   35.70
   1  10   9  351.26   32.90
  -2 -10  -9   48.80   13.30
   2 -10   9   86.09   17.10
  -2  10  -9   72.89   17.30
   2  10   9   43.00   12.60
   3 -10   9   21.60   12.50
  -3 -10  -9   70.59   15.60
  -3  10  -9   70.09   17.20
   3  10   9   52.79   12.50
   4 -10   9   94.79   20.70
  -4 -10  -9   87.19   16.30
  -4  10  -9   75.99   18.90
   4  10   9  112.19   17.70
   5 -10   9   66.29   17.50
   5  10   9   92.09   15.90
  -5  10  -9   26.70   16.40
   6 -10   9   52.59   18.50
   6  10   9   65.69   14.80
  -6  10  -9   61.99   18.60
   7 -10   9   65.79   21.20
  -7  10  -9   23.70   22.50
   7  10   9   67.59   14.50
   8 -10   9  -11.10   18.80
   8  10   9    3.20   12.10
  -8  10  -9    9.90   20.70
   9 -10   9  -14.20   22.20
  -9  10  -9   25.40   24.50
   9  10   9   16.40   13.30
  10 -11  -9   11.50   25.90
 -10  11   9   33.90   22.70
   9 -11  -9   18.70   19.20
  -9  11   9  -14.10   16.80
  -8 -11   9    4.10    8.00
  -8 -11   9   17.10    8.10
   8 -11  -9   30.10   18.20
  -8  11   9   -4.90   14.40
  -7 -11   9   -0.20    8.30
  -7 -11   9   -8.80    8.50
   7 -11  -9   22.00   18.50
  -7  11   9  -18.90   12.50
   6 -11  -9   43.70   17.30
  -6 -11   9   23.80   10.20
  -6  11   9   36.70   15.00
   5 -11  -9   80.69   19.60
  -5  11   9   93.09   19.50
   4 -11  -9  101.39   20.70
  -4 -11   9   70.89   15.00
  -4  11   9   70.09   16.80
   4  11  -9   92.29   17.20
   3 -11  -9   46.50   13.90
  -3 -11   9   38.60   12.70
  -3  11   9   66.89   16.00
   3  11  -9   25.90   11.40
  -2 -11   9   11.20    9.40
   2 -11  -9    4.10    9.40
   2  11  -9    4.90    9.90
  -2  11   9   -1.70    8.50
   1 -11  -9  121.69   21.70
  -1 -11   9  115.59   20.50
  -1  11   9  154.88   21.70
   1  11  -9  102.89   20.60
   0 -11  -9  138.59   21.70
   0  11   9  135.49   21.20
   0  11  -9  138.99   22.60
   1 -11   9   -7.10    9.90
  -1 -11  -9   11.90   10.20
  -1  11  -9   16.50   11.80
   1  11   9    8.10    8.60
  -2 -11  -9  192.38   25.10
   2 -11   9  172.68   26.50
   2  11   9  159.08   22.70
  -2  11  -9  160.88   26.00
  -3 -11  -9   17.00   10.90
   3 -11   9   12.00   12.50
   3  11   9   15.70   10.50
  -3  11  -9    9.70   12.30
   4 -11   9   49.60   16.40
  -4 -11  -9   13.40   10.30
  -4  11  -9   80.99   18.70
   4  11   9   39.70   11.80
   5 -11   9  303.47   35.90
   5  11   9  223.18   26.90
  -5  11  -9  203.68   32.60
  -6 -11  -9  -15.00   17.30
   6 -11   9   27.80   19.40
  -6  11  -9   15.00   18.30
   6  11   9   32.80   11.90
   7 -11   9   18.90   19.20
  -7  11  -9   13.70   19.90
   8 -11   9   12.10   21.70
  -8  11  -9   15.00   22.60
   8  11   9    3.10   13.10
   9 -11   9    0.50   25.50
  -9  11  -9   -1.00   29.90
  10 -12  -9  -40.30   26.10
  -9 -12   9   17.30    3.80
   9 -12  -9   18.10   23.00
  -9  12   9   -8.30   20.30
  -8 -12   9  171.48   20.90
   8 -12  -9  231.48   35.00
  -8  12   9  178.98   29.60
  -7 -12   9   -9.70    8.70
  -7 -12   9    5.80    9.20
   7 -12  -9   14.70   17.80
  -7  12   9    6.10   13.90
  -6 -12   9   21.50   10.40
   6 -12  -9    5.60   14.00
  -6  12   9   -3.80   14.30
   5 -12  -9   76.69   18.50
  -5  12   9   52.69   17.00
   4 -12  -9   22.00   13.40
  -4 -12   9    2.70    9.70
   4  12  -9    4.90   10.70
  -4  12   9    0.20   10.80
   3 -12  -9  434.56   47.10
  -3 -12   9  470.35   45.90
  -3  12   9  509.15   47.70
   3  12  -9  552.64   47.70
  -2 -12   9   36.40   13.50
   2 -12  -9   36.50   12.10
  -2  12   9   58.49   14.10
   2  12  -9   27.60   13.30
   1 -12  -9    7.90   10.50
  -1 -12   9  -11.00   11.40
  -1  12   9    4.20   10.60
   1  12  -9   -8.50   10.40
   0 -12   9   13.50   12.40
   0 -12  -9    1.80   10.20
   0  12  -9   14.10   11.60
   0  12   9   16.60   10.20
  -1 -12  -9   32.10   13.30
  -1  12  -9   67.29   17.50
   1  12   9   63.19   14.70
   2 -12   9  407.16   43.30
  -2 -12  -9  453.95   41.80
  -2  12  -9  407.86   44.20
   2  12   9  416.46   40.40
   3 -12   9  269.37   36.10
  -3 -12  -9  355.16   33.50
   3  12   9  280.97   31.10
  -3  12  -9  251.77   36.00
   4 -12   9   79.59   21.40
   4  12   9  142.59   23.90
  -4  12  -9   67.89   22.10
   5 -12   9   63.79   20.00
  -5  12  -9   49.50   19.60
   5  12   9   57.99   13.00
  -6 -12  -9   57.99   17.20
   6 -12   9   51.39   19.70
  -6  12  -9   47.40   19.50
   7 -12   9    1.70   20.60
  -7  12  -9   15.50   21.20
   8 -12   9   10.90   25.70
   8  12   9   26.40   16.30
  -8  12  -9    3.20   25.10
   9  12   9   18.80   14.80
  -9 -13   9   35.80    7.10
   9 -13  -9   83.29   29.00
  -8 -13   9   12.80   10.40
   8 -13  -9   25.50   22.90
  -8  13   9   11.60   19.30
  -7 -13   9   23.10   12.40
   7 -13  -9  -10.60   18.30
  -7  13   9    0.90   15.50
   6 -13  -9   12.10   17.90
  -6 -13   9    2.40   11.70
  -6 -13   9   -3.40   10.40
  -6  13   9   12.90   15.20
   5 -13  -9   32.60   16.80
   5  13  -9   -7.20   11.40
  -5  13   9   31.40   15.10
   4 -13  -9  345.07   38.30
  -4  13   9  294.07   35.80
   4  13  -9  303.47   35.80
  -3 -13   9   10.10   11.70
   3 -13  -9   18.90   13.40
  -3  13   9   18.10   11.80
   3  13  -9   15.80   13.30
   2 -13  -9  101.99   20.90
  -2 -13   9   77.99   17.20
   2  13  -9   92.29   19.90
  -2  13   9  114.69   20.70
  -1 -13   9   52.69   16.10
   1 -13  -9   31.40   14.40
  -1  13   9   21.90   13.50
   1  13  -9   20.90   14.10
   0 -13  -9   -6.60   11.10
   0 -13   9  -24.00   10.80
   0  13   9    6.90   11.30
   0  13  -9  -17.50   11.70
   1 -13   9   -2.50   13.70
  -1 -13  -9   -8.80   11.50
   1  13   9    8.30   12.10
  -1  13  -9    4.60   13.00
  -2 -13  -9   70.89   17.50
   2 -13   9   49.99   18.10
  -2  13  -9   61.09   20.60
   2  13   9   84.99   17.40
   3 -13   9  150.48   28.80
  -3  13  -9  286.97   36.70
   3  13   9  182.78   26.50
  -4 -13  -9   36.10   13.70
   4 -13   9   50.49   18.40
   4  13   9   74.39   16.60
  -4  13  -9   62.99   20.40
   5 -13   9  -11.50   16.00
  -5 -13  -9    7.10   13.30
  -5  13  -9  -12.00   17.60
   5  13   9   15.90   12.20
   6 -13   9   27.60   22.10
  -6  13  -9   -5.30   20.20
   7 -13   9    9.60   24.60
  -7  13  -9   11.00   23.20
   8 -13   9   -0.90   27.00
  -8  13  -9   17.50   27.30
   9  13   9   -3.50   16.70
   9 -14  -9   36.80   30.40
  -9  14   9   48.00   32.30
   8 -14  -9   -2.60   24.10
  -8 -14   9    4.80   11.40
  -8  14   9   28.40   21.80
   7 -14  -9   -8.30   22.80
  -7  14   9   32.60   19.20
   6 -14  -9   57.19   22.40
  -6  14   9   20.50   16.50
   5 -14  -9   51.69   19.10
  -5 -14   9   20.90   13.00
   5  14  -9   14.90   13.80
  -5  14   9   19.60   15.90
  -4 -14   9    6.70   12.60
   4 -14  -9   17.50   17.80
   4  14  -9   10.50   14.50
  -4  14   9   59.49   18.20
   3 -14  -9  351.06   40.00
   3  14  -9  338.87   38.70
  -3  14   9  305.97   37.20
  -2 -14   9   70.19   18.10
   2 -14  -9   73.29   19.90
   2  14  -9   49.90   17.90
  -2  14   9   42.00   16.40
   1 -14  -9   49.10   18.20
  -1 -14   9   26.80   14.40
   1  14  -9   46.50   17.00
  -1  14   9   46.60   15.30
   0 -14   9   11.30   13.40
   0 -14  -9   17.90   15.20
   0  14  -9   21.60   14.30
   0  14   9   -3.60   12.30
  -1 -14  -9  105.09   20.90
   1 -14   9   65.89   21.30
   1  14   9  128.09   23.00
  -1  14  -9   78.99   20.40
   2 -14   9   27.90   15.60
  -2  14  -9   41.30   18.80
   2  14   9   32.20   15.30
  -3 -14  -9   20.50   14.20
   3 -14   9    6.90   17.20
   3  14   9   31.80   16.00
  -3  14  -9   40.00   18.70
  -4 -14  -9   -5.60   13.70
   4 -14   9   10.30   19.00
   4  14   9    4.00   13.00
   5 -14   9   -3.20   20.70
  -5  14  -9    3.30   18.00
   6 -14   9   11.00   23.40
  -6  14  -9   19.40   21.70
   7 -14   9   19.00   26.10
  -7  14  -9  -42.40   25.80
   8 -15  -9  -19.40   26.40
  -8 -15   9    0.00   13.20
  -8  15   9   15.10   25.30
   7 -15  -9    0.70   25.70
  -7 -15   9   20.80   14.60
  -7  15   9   37.00   22.90
   6 -15  -9  -34.90   19.50
  -6  15   9   10.50   17.60
   5 -15  -9    9.70   18.20
   4 -15  -9  124.09   26.50
  -4 -15   9   98.59   21.30
  -4  15   9  125.79   26.20
   4  15  -9  108.09   21.60
   3 -15  -9   98.49   23.90
  -3 -15   9   92.19   21.20
   3  15  -9  133.99   25.20
  -3  15   9  127.19   24.50
   2 -15  -9   56.19   20.80
  -2  15   9   51.39   17.70
   2  15  -9   56.49   21.10
   1 -15  -9   51.89   19.90
  -1 -15   9   74.49   19.60
   1  15  -9   66.39   20.00
  -1  15   9   77.49   19.40
   0 -15   9  113.59   23.40
   0 -15  -9  141.59   25.60
   0  15   9   89.19   20.60
   0  15  -9  128.59   25.90
   1 -15   9   39.90   18.20
   1  15   9   55.39   16.80
  -1  15  -9   98.59   22.60
  -2 -15  -9   14.40   15.10
   2 -15   9   17.30   17.60
  -2  15  -9  -24.00   16.80
   2  15   9   16.20   14.50
  -3 -15  -9   20.00   15.40
   3 -15   9   15.10   17.40
   3  15   9   -5.40   13.90
  -3  15  -9   12.90   18.40
   4 -15   9    9.30   17.90
  -4  15  -9   18.60   21.30
  -5  15  -9   61.19   26.00
   6 -15   9   37.30   26.70
  -6  15  -9   32.60   27.50
   7 -15   9  -21.40   30.00
  -7  15  -9  -27.90   27.10
  -8 -16   9  -19.30   15.10
   8 -16  -9  -12.60   33.90
  -7 -16   9   14.30   16.70
   7 -16  -9    0.00   27.20
  -7  16   9    9.40   24.60
   6 -16  -9  -16.40   24.40
  -6  16   9    9.60   21.70
   5 -16  -9   13.00   23.10
  -5  16   9   58.49   22.90
   4 -16  -9   89.49   26.40
  -4  16   9    6.00   19.20
  -3 -16   9   15.60   15.60
   3 -16  -9  -15.10   16.40
   3  16  -9   -6.60   17.00
  -3  16   9   -6.20   18.10
   2 -16  -9    0.80   18.10
  -2 -16   9   -7.30   15.80
   2  16  -9   -0.90   17.00
  -2  16   9   -3.10   15.30
   1 -16  -9    7.20   16.40
  -1  16   9  -10.60   14.70
   0 -16   9   11.00   23.00
   0  16  -9   63.59   22.60
   0  16   9   45.10   19.20
  -1 -16  -9  -12.70   16.80
   1 -16   9   -1.50   16.40
  -1  16  -9   24.40   20.00
   1  16   9   -3.60   15.50
   2 -16   9    7.30   19.80
  -2 -16  -9   11.10   17.80
  -2  16  -9   17.40   19.00
   2  16   9   -0.70   15.80
   3 -16   9   31.00   20.70
  -3  16  -9   43.10   20.60
   4 -16   9   53.99   25.60
  -4  16  -9    5.90   24.10
   5 -16   9   94.29   28.90
  -5  16  -9  101.39   29.60
   6 -16   9  -23.70   29.60
  -6  16  -9   18.70   30.50
  -8 -17   9   10.40   26.90
  -7 -17   9   12.30   19.70
   7 -17  -9   32.00   40.50
  -7  17   9   22.50   26.70
   6 -17  -9   57.59   30.20
  -6  17   9   51.79   27.80
   5 -17  -9  121.09   32.10
  -5  17   9  126.89   30.30
   4 -17  -9   29.00   25.00
  -4  17   9    6.90   20.70
   3 -17  -9   29.20   21.90
  -3  17   9   54.99   21.40
  -2 -17   9  -23.20   17.40
   2 -17  -9  -14.70   20.30
   2  17  -9   -2.20   20.30
  -2  17   9   18.10   20.10
  -1 -17   9   15.30   18.40
  -1  17   9   51.49   25.10
   1  17  -9   25.40   21.10
   0 -17  -9   22.10   20.40
   0 -17   9    5.80   19.50
   0  17  -9   64.39   25.20
   0  17   9   28.30   17.90
  -1 -17  -9   -0.40   18.70
   1  17   9   14.20   18.30
  -1  17  -9    8.30   22.80
   2 -17   9   39.90   22.00
  -2  17  -9   83.09   25.70
   3 -17   9    6.70   22.50
  -3  17  -9   19.30   22.40
   4 -17   9    4.50   25.40
  -4  17  -9   14.10   26.90
   5 -17   9   -3.30   25.80
  -5  17  -9  -30.30   27.60
   6 -17   9  116.79   40.90
  -6  17  -9   93.09   36.90
   6 -18  -9    7.00   33.40
  -6  18   9   -9.80   29.20
   5 -18  -9  -14.20   28.70
  -5  18   9  -16.40   26.90
   4 -18  -9  -43.70   27.40
  -4  18   9   30.70   24.00
  -3  18   9   20.70   23.80
  -2  18   9   27.60   20.80
   1 -18  -9   20.70   22.70
  -1  18   9   32.10   21.70
   0 -18   9   33.20   22.70
   0 -18  -9   20.30   22.60
   0  18   9   19.40   20.80
   0  18  -9    8.30   24.00
   1 -18   9   78.89   25.40
  -1  18  -9  149.39   31.60
  -2  18  -9   34.00   25.20
  -3  18  -9   21.90   26.90
   4 -18   9   26.30   28.20
  -4  18  -9   34.80   32.20
   5 -18   9   34.30   32.30
  -5  18  -9   24.90   35.00
   6 -19  -9    2.00   39.90
  -6  19   9  -49.20   34.90
   5 -19  -9  -31.80   35.80
  -5  19   9    7.30   30.70
   3 -19  -9   -0.80   28.70
  -3  19   9    9.80   27.10
   2 -19  -9  -55.19   25.00
  -2  19   9  -16.30   24.20
   1 -19   9  -12.60   25.70
   2 -19   9   16.20   28.60
  -2  19  -9   20.40   30.20
   3 -19   9   38.80   30.40
  -3  19  -9   30.90   33.00
   4 -19   9    0.90   43.40
  -4  19  -9  119.59   38.50
   5 -20  -9  -44.50   37.50
  -5  20   9  -74.59   36.00
   4 -20  -9  -40.00   35.20
  -4  20   9   48.20   31.70
   3 -20  -9   11.40   31.50
   4 -20   9   37.10   41.40
  -4  20  -9   99.39   53.99
  11   0 -10  300.47   31.40
 -11   0  10  357.66   31.90
 -10   0  10  293.07   28.90
  -9   0  10   -0.40    8.10
   9   0 -10    6.90    8.30
  -8   0  10   18.20    8.70
   8   0 -10   17.70    8.30
  -7   0  10   16.10    8.00
   7   0 -10   23.30    8.10
  -6   0  10    2.90    6.00
   6   0 -10    1.40    5.80
  -5   0  10  473.75   40.30
   5   0 -10  468.75   40.60
  -4   0  10   43.30    9.40
  -3   0  10  643.54   50.29
   3   0 -10  576.24   50.09
  -2   0  10 1297.17   99.59
   2   0 -10 1317.97  100.09
  -1   0  10 1095.39   84.79
   0   0  10  242.58   24.60
   0   0 -10  258.27   25.40
   1   0  10   43.90    9.70
   2   0  10    5.70    6.00
   2   0  10   -1.70    5.30
   3   0  10   -2.10    6.10
   3   0  10    8.20    6.90
   4   0  10  195.18   22.20
   5   0  10    2.00    8.20
   5   0  10    8.50    8.60
   6   0  10 1222.68   98.19
   6   0  10 1282.67   99.19
   7   0  10  114.99   19.40
   7   0  10  136.89   19.70
   8   0  10  120.99   20.10
   8   0  10  110.19   20.00
   9   0  10   14.80   13.80
  10   0  10   -7.70   20.30
  11   0  10   13.10   18.70
  12   0  10   34.30   25.40
 -12  -1  10  -11.40    6.70
  12  -1 -10   -1.60   12.50
 -12   1  10   -0.60   12.70
 -11  -1  10   71.39   12.30
  11  -1 -10   90.59   15.90
 -11   1  10   84.09   15.50
 -10  -1  10   30.10    9.80
  10  -1 -10   31.50   11.10
 -10   1  10   -4.30   10.20
   9  -1 -10    5.30    9.00
  -9  -1  10    2.10    7.30
  -9   1  10   -3.00    8.20
   9   1 -10   10.30    8.10
  -8  -1  10    4.20    6.80
   8  -1 -10    9.90    8.60
  -8   1  10   34.90    9.80
   8   1 -10   26.70    8.30
  -7  -1  10    4.10    6.40
   7  -1 -10    0.30    6.60
   7   1 -10   -0.50    6.50
  -7   1  10    2.10    7.20
  -6  -1  10  147.09   16.20
   6  -1 -10  106.49   15.50
  -6   1  10  115.89   16.00
   6   1 -10   97.29   17.30
  -5  -1  10  141.99   15.90
   5  -1 -10  122.49   16.90
   5   1 -10  101.89   15.60
  -5   1  10  104.89   16.00
  -4  -1  10  100.59   14.40
  -4   1  10  118.29   15.70
   4   1 -10   84.39   13.90
   3  -1 -10  310.57   29.10
  -3  -1  10  297.07   28.00
  -3   1  10  294.67   28.40
   3   1 -10  314.87   29.10
  -2  -1  10   20.90    6.90
   2  -1 -10   21.50    7.40
  -2   1  10   16.10    6.60
   2   1 -10   31.20    8.60
  -1  -1  10  261.37   27.80
   1  -1 -10  248.38   25.40
   1   1 -10  240.68   25.60
  -1   1  10  302.77   26.20
   0  -1  10  891.61   68.39
   0  -1 -10  839.32   68.19
   0  -1  10  835.12   68.59
   0   1  10  859.01   68.09
  -1  -1 -10  119.29   16.50
   1  -1  10   88.29   17.10
   1  -1  10   90.89   14.50
   1   1  10  129.69   16.90
   2  -1  10   56.19   11.90
   2  -1  10   54.89   12.20
   2   1  10   53.29   11.30
   3  -1  10   36.00    9.40
   3  -1  10   30.50   10.00
   3   1  10   37.10    9.90
   3   1  10   21.40    7.70
   4  -1  10   96.89   15.50
   4  -1  10   93.89   16.30
   4   1  10   57.59   12.50
   5  -1  10  619.24   56.79
   5  -1  10  638.04   60.59
   5   1  10  782.92   58.09
   5   1  10  683.33   57.79
   6  -1  10   16.20    9.80
   6  -1  10    6.00    9.10
   6   1  10   -2.20    8.30
   6   1  10   -0.80    9.60
   7  -1  10  143.79   23.60
   7  -1  10  216.28   25.00
   7   1  10  180.08   25.20
   7   1  10  195.18   25.00
   8  -1  10   19.20   11.80
   8  -1  10   24.20   14.20
   8   1  10   -7.20   11.50
   8   1  10    3.60   11.20
   9  -1  10    3.80   14.70
   9   1  10   20.20   13.80
  10  -1  10   -9.30   15.50
  10   1  10   -3.40   15.40
  11  -1  10   14.50   19.60
  11   1  10   17.10   16.80
  12   1  10   12.00   27.40
  13  -2 -10   39.70   16.10
 -13   2  10  -11.80   16.30
  12  -2 -10    7.60   14.40
 -12   2  10   48.60   15.80
 -11  -2  10   10.10    7.50
  11  -2 -10   25.90   12.80
 -11   2  10   23.70   12.50
  10  -2 -10   60.99   13.40
 -10  -2  10   27.80    9.50
 -10  -2  10   53.59   11.30
 -10   2  10   52.89   13.60
   9  -2 -10  301.97   30.20
  -9  -2  10  313.97   27.10
  -9   2  10  241.98   29.10
  -8  -2  10   74.09   12.00
   8  -2 -10   86.09   15.20
  -8   2  10   66.39   12.80
  -7  -2  10   34.30    8.60
   7  -2 -10   25.90    9.00
  -7   2  10   30.10    9.10
   7   2 -10   37.30    9.50
   6  -2 -10   28.10    9.20
  -6   2  10   22.30    8.80
   6   2 -10   31.20    8.80
  -5  -2  10  305.37   29.30
  -5   2  10  359.16   31.10
   5   2 -10  323.97   30.40
  -4  -2  10  114.09   15.40
   4  -2 -10   89.89   14.90
  -4   2  10  120.29   16.70
   4   2 -10  151.78   18.20
   3  -2 -10  404.86   38.20
  -3  -2  10  492.05   38.50
  -3   2  10  427.16   38.40
  -2  -2  10  158.88   17.80
   2  -2 -10  157.18   18.10
  -1  -2  10  205.28   23.10
  -1  -2  10  278.77   24.80
   1  -2 -10  226.08   23.40
  -1   2  10  216.08   23.10
   0  -2  10    1.40    5.40
   0  -2  10   13.70    6.20
   0  -2 -10    9.90    5.70
   0   2  10    7.10    6.10
   1  -2  10  221.38   22.60
  -1  -2 -10  215.88   22.20
   1  -2  10  159.18   21.70
   1   2  10  225.48   22.20
   2  -2  10   25.30    8.70
   2  -2  10   39.50   10.70
  -2  -2 -10   28.00    8.90
   2   2  10   15.80    7.10
   3  -2  10  162.08   20.30
   3  -2  10  150.98   21.70
   3   2  10  191.68   20.70
   4  -2  10  731.03   60.89
   4  -2  10  633.24   62.89
   4   2  10  756.42   59.69
   4   2  10  748.53   60.09
   5  -2  10   -1.20    9.00
   5   2  10   -0.80    7.30
   5   2  10    6.80    7.30
   6  -2  10  200.48   26.40
   6  -2  10  157.28   24.40
   6   2  10  203.28   23.10
   6   2  10  146.19   29.60
   7  -2  10   59.09   16.00
   7  -2  10   49.90   14.10
   7   2  10   38.70   12.80
   7   2  10   64.19   14.40
   8  -2  10  -17.90   12.30
   8  -2  10    2.20   12.40
   8   2  10   27.20   11.50
   8   2  10    6.70   10.30
   9  -2  10   59.19   18.80
   9   2  10   32.20   15.10
  10  -2  10   29.60   17.90
  10   2  10   20.20   15.40
  11  -2  10   50.49   21.00
  11   2  10   28.20   16.20
  13  -3 -10   25.10   26.80
  12  -3 -10   -0.30   15.10
 -12   3  10   -9.70   15.60
  11  -3 -10    8.80   16.20
 -11   3  10   27.00   13.90
  10  -3 -10   59.49   16.50
 -10  -3  10   99.39   12.20
 -10  -3  10  101.19   13.00
 -10   3  10   71.39   15.80
   9  -3 -10   -5.80    9.40
  -9  -3  10   -3.80    7.20
  -9  -3  10    8.20    7.20
  -9   3  10   10.20    9.80
  -8  -3  10   71.99   12.00
   8  -3 -10  103.69   16.80
  -8  -3  10   81.69   12.70
   7  -3 -10    2.00    8.40
  -7  -3  10    9.20    7.10
  -7  -3  10   -4.20    5.80
  -7   3  10    4.60    7.80
  -6  -3  10    1.50    5.70
   6  -3 -10    1.10    7.60
  -6  -3  10   -4.30    6.00
  -6   3  10    4.80    7.20
  -5  -3  10   82.39   13.60
  -5  -3  10   82.89   13.00
  -5   3  10   84.49   14.40
  -4  -3  10   20.90    8.40
  -4  -3  10   25.40    7.90
   4  -3 -10   29.30    8.70
  -4   3  10   45.00   10.00
   3  -3 -10   -4.10    6.00
  -3  -3  10   -2.80    5.20
  -3  -3  10    4.20    5.20
  -3   3  10    1.10    5.70
  -2  -3  10  346.77   31.60
  -2  -3  10  353.16   32.10
  -2   3  10  335.37   31.80
  -1  -3  10  611.64   48.20
   1  -3 -10  502.25   47.30
  -1  -3  10  564.64   48.30
  -1   3  10  603.74   48.30
   0  -3  10  521.55   42.80
   0  -3 -10  537.45   42.70
   0  -3  10  411.96   41.90
   0   3  10  481.65   41.90
  -1  -3 -10    9.30    6.30
   1  -3  10    5.70    6.00
   1  -3  10    2.80    6.70
   1   3  10    8.90    6.70
  -2  -3 -10  142.19   20.30
   2  -3  10  184.68   20.90
   2   3  10  158.38   19.20
   3  -3  10    7.00    7.90
  -3  -3 -10    6.90    7.60
   3  -3  10    8.80    7.40
   3   3  10    1.70    6.30
   4  -3  10    0.60    8.10
   4  -3  10   25.90   10.80
   4   3  10   -5.20    6.20
   4   3  10    1.00    7.00
   5  -3  10  154.98   22.60
   5  -3  10  189.68   25.00
   5   3  10  193.68   20.90
   5   3  10  144.39   21.60
   6  -3  10  126.49   21.50
   6  -3  10  127.29   22.10
   6   3  10  144.69   20.50
   6   3  10  182.78   21.70
   7  -3  10   81.49   17.90
   7  -3  10  119.79   21.50
   7   3  10   97.89   17.40
   7   3  10   83.99   15.70
   8  -3  10   80.59   19.00
   8   3  10  102.09   16.70
   8   3  10   68.79   16.60
   9  -3  10   71.59   19.20
   9   3  10   31.90   14.50
  10  -3  10   42.00   19.00
  10   3  10    1.10   13.80
  13  -4 -10    0.00   20.20
  12  -4 -10   25.50   18.00
 -12   4  10  -47.80   16.90
  11  -4 -10   18.80   15.20
 -11   4  10   20.60   14.60
  10  -4 -10   20.70   13.40
 -10  -4  10   37.40    7.00
 -10  -4  10   38.30    7.70
 -10   4  10   45.50   13.90
   9  -4 -10   14.80   11.50
  -9  -4  10   13.30    7.30
  -9  -4  10   12.50    7.40
  -9   4  10    3.60   10.30
  -8  -4  10   69.99   12.00
   8  -4 -10   60.89   14.60
  -8  -4  10   66.09   11.40
  -8   4  10   61.49   13.50
  -7  -4  10  117.39   16.70
   7  -4 -10  131.19   20.00
  -7  -4  10  143.99   16.60
  -7   4  10  171.08   21.60
  -6  -4  10  131.19   16.80
  -6  -4  10  120.59   16.60
  -6   4  10  138.19   19.30
  -5  -4  10   22.50    8.00
  -5  -4  10   13.50    6.20
   5  -4 -10   22.70    8.50
  -5   4  10   14.70    7.90
  -4  -4  10   -0.60    6.20
   4  -4 -10    2.30    6.20
  -4  -4  10   -1.20    5.00
  -4   4  10    3.00    6.30
  -3  -4  10   -1.90    5.50
  -3  -4  10    5.00    6.30
   3  -4 -10    7.70    6.20
  -3   4  10   11.10    7.50
   2  -4 -10  232.68   25.90
  -2  -4  10  311.67   27.50
  -2  -4  10  264.27   25.70
  -2   4  10  239.28   25.70
   1  -4 -10  122.09   17.00
  -1  -4  10  149.29   19.20
  -1  -4  10   89.69   16.00
  -1   4  10  127.69   17.30
   0  -4  10  708.33   56.49
   0  -4 -10  629.44   55.29
   0  -4  10  700.03   56.79
   0   4  10  669.43   55.79
  -1  -4 -10  365.76   33.50
   1  -4  10  344.67   33.70
   1  -4  10  307.17   33.10
   1   4  10  417.46   34.10
  -2  -4 -10   63.09   12.80
   2  -4  10   68.69   13.90
   2   4  10   83.69   13.60
   3  -4  10   36.40   10.20
  -3  -4 -10   33.90    9.90
   4  -4  10   18.60   10.80
  -4  -4 -10   23.60    8.90
   4   4  10   11.40    7.90
   5  -4  10    1.20    9.60
   5   4  10    2.90    7.50
   5   4  10   15.70    8.20
   6   4  10    5.50    8.60
   6   4  10   -2.60    8.90
   7  -4  10  151.58   24.40
   7  -4  10  121.69   22.60
   7   4  10  147.19   21.70
   7   4  10  124.79   21.10
   8  -4  10   -3.10   13.50
   8  -4  10    1.10   14.40
   8   4  10   -7.70   11.20
   8   4  10    0.90   10.10
   9  -4  10   56.69   18.20
   9   4  10   -9.50   14.60
  10  -4  10   13.00   20.00
  10   4  10   -6.20   13.50
  11   4  10    0.70   13.20
  12  -5 -10   38.70   20.40
 -12   5  10   31.50   22.80
  11  -5 -10  -10.10   15.00
 -11   5  10    8.90   15.70
  10  -5 -10   17.50   14.50
 -10  -5  10    2.50    2.70
 -10   5  10    8.20   12.90
  -9  -5  10    6.70    6.50
   9  -5 -10   19.10   12.00
  -9  -5  10   -2.90    6.70
  -9   5  10   -2.60   16.80
   8  -5 -10   76.89   16.30
  -8  -5  10   92.99   13.30
  -8  -5  10   69.59   12.00
  -8   5  10  102.29   17.60
  -7  -5  10    4.90    6.50
  -7  -5  10    7.50    6.50
   7  -5 -10    4.00    9.20
  -7   5  10    0.70    8.00
   6  -5 -10   -0.60    7.80
  -6  -5  10   33.30    7.90
  -6  -5  10   18.40    7.80
  -6   5  10   29.20   10.70
  -5  -5  10    9.80    7.00
  -5  -5  10    8.70    6.40
   5  -5 -10   12.70    8.00
  -5   5  10    1.20    7.80
  -4  -5  10  151.98   18.00
   4  -5 -10  101.29   16.90
  -4   5  10  120.79   18.30
  -3  -5  10   -0.40    6.50
   3  -5 -10    0.70    7.30
  -3  -5  10    0.80    5.40
  -3   5  10   12.70    7.00
  -2  -5  10   48.80   11.40
  -2  -5  10   66.39   13.10
   2  -5 -10   66.79   13.00
  -2   5  10   56.79   12.10
   1  -5 -10   15.20    6.20
  -1  -5  10   16.30    7.90
  -1  -5  10    8.10    6.40
  -1   5  10   21.10    7.90
   0  -5  10   -9.90    6.30
   0  -5 -10    1.50    6.10
   0   5  10    1.80    6.10
   1  -5  10  463.25   44.10
  -1  -5 -10  502.15   43.50
  -1   5 -10  510.35   44.80
   1   5  10  514.15   43.70
  -2  -5 -10  212.98   23.70
   2  -5  10  194.88   24.50
  -2   5 -10  199.48   24.20
   2   5  10  228.68   23.50
  -3  -5 -10   46.40   14.10
   3  -5  10   36.40   12.40
  -3   5 -10   45.60   11.60
   3   5  10   33.80    9.50
  -4  -5 -10   -8.10    7.10
   4  -5  10   -3.00    8.60
   4   5  10    7.50    7.40
  -4   5 -10    9.70    9.40
   5  -5  10  334.57   36.40
  -5   5 -10  323.07   36.00
   5   5  10  385.56   34.20
   6  -5  10    4.50   11.20
  -6   5 -10   -4.40   10.20
   6   5  10   -7.90    7.70
   6   5  10   -6.70    8.60
   7  -5  10   83.19   22.00
   7   5  10   98.99   17.10
   7   5  10   76.49   17.30
   8  -5  10    2.00   15.30
   8   5  10   -0.70   11.00
   8   5  10    4.10   10.30
   9  -5  10   79.19   23.40
   9   5  10   79.29   16.60
  10  -5  10   18.80   20.70
  10   5  10  -25.90   12.50
  12  -6 -10    8.40   26.70
 -12   6  10   49.40   23.60
  11  -6 -10   13.50   17.50
 -11   6  10   15.60   17.20
  10  -6 -10   12.70   15.60
 -10   6  10   30.20   15.00
   9  -6 -10  156.68   24.50
  -9  -6  10  143.09   15.60
  -9   6  10  143.89   23.00
  -8  -6  10    3.40    6.30
   8  -6 -10   14.40   11.80
  -8  -6  10   -1.00    7.40
  -8   6  10    3.00   10.10
  -7  -6  10   -7.30    6.20
  -7  -6  10    3.80    6.70
  -7   6  10   -4.70    8.70
  -6  -6  10   29.80    7.90
   6  -6 -10   12.90   10.40
  -6  -6  10   23.30    7.70
  -6   6  10   18.40    9.70
  -5  -6  10  239.48   23.90
   5  -6 -10  210.58   26.10
  -5  -6  10  249.48   25.00
  -5   6  10  250.87   26.80
   4  -6 -10   66.59   15.10
  -4  -6  10  117.89   16.70
  -4  -6  10  110.29   15.70
  -4   6  10   97.99   18.60
  -3  -6  10  165.68   18.50
   3  -6 -10  141.19   19.80
  -3  -6  10  116.69   18.60
  -3   6  10  119.19   18.80
  -2  -6  10    8.50    6.70
  -2  -6  10    2.80    6.80
   2  -6 -10   -6.90    6.70
  -2   6  10    2.00    6.80
  -1  -6  10   50.19   12.20
   1  -6 -10   39.60   10.90
  -1   6  10   48.60   11.20
   0  -6 -10   25.30    9.20
   0  -6  10   17.20    8.40
   0   6  10   14.10    6.90
   0   6 -10   22.50    9.10
   1  -6  10   72.09   14.30
  -1  -6 -10   41.50   11.60
  -1   6 -10   47.00   11.60
   1   6  10   40.30   10.60
  -2  -6 -10   14.20    8.20
   2  -6  10   15.30    9.60
  -2   6 -10    8.10    8.30
   2   6  10    7.80    6.80
   3  -6  10  378.16   40.60
  -3  -6 -10  471.35   40.20
  -3   6 -10  463.25   41.80
   3   6  10  417.66   38.70
  -4  -6 -10   10.40    8.30
   4  -6  10    1.40   10.80
   4   6  10   -0.40    7.40
  -4   6 -10  -13.70    8.80
   5  -6  10  153.28   24.80
   5   6  10  152.78   21.40
  -5   6 -10  175.68   25.00
   6  -6  10   24.60   12.50
   6   6  10   15.20   10.40
   6   6  10    6.30    9.10
  -6   6 -10   20.00   13.00
   7  -6  10    2.90   14.60
   7   6  10   40.50   12.10
   7   6  10   65.29   13.10
  -7   6 -10   40.30   16.10
   8  -6  10   14.40   15.90
   8   6  10   28.90   12.90
  -8   6 -10   10.10   16.60
   8   6  10   18.30   11.80
   9  -6  10  -19.40   18.10
   9   6  10   26.10   13.70
  10  -6  10  -11.90   21.90
  10   6  10   -4.30   12.60
  11  -7 -10   31.20   20.00
 -11   7  10    3.40   19.60
  10  -7 -10   41.60   20.00
 -10   7  10   34.30   17.20
   9  -7 -10   63.59   18.70
  -9  -7  10   56.69    9.00
  -9  -7  10   50.19    8.60
  -9   7  10   41.70   14.30
   8  -7 -10  101.69   20.10
  -8  -7  10  103.69   14.10
  -8  -7  10   92.19   13.70
  -8   7  10   97.29   18.80
  -7  -7  10   33.30    9.30
  -7  -7  10   55.99   10.00
   7  -7 -10   15.00   11.60
  -7   7  10   49.70   12.70
  -6  -7  10  144.79   17.20
   6  -7 -10  129.19   21.10
  -6  -7  10   93.99   15.70
  -6   7  10  117.79   19.30
   5  -7 -10    7.90    9.00
  -5  -7  10    7.20    7.60
  -5   7  10   -3.30    8.80
  -4  -7  10   66.29   12.80
  -4  -7  10   71.39   13.50
   4  -7 -10   74.19   15.50
  -4   7  10   77.19   14.90
   3  -7 -10   79.09   15.90
  -3  -7  10   99.69   18.90
[truncated: 285,932 more chars]
