# Supplementary material for: Nucleophilic Substitution at a Coordinatively Saturated Five-Membered NHC∙Haloborane Centre
Source: MDPI journal article supplement (doi:10.3390/inorganics10070097), 2022-07-07
Supplement: s1 [file s1 › Cif_7.cif]

data_mo_gar_78_0m_a
_audit_creation_date               2022-06-17
_audit_creation_method
;
Olex2 1.5
(compiled 2021.08.20 svn.r13c46975 for OlexSys, GUI svn.r6405)
;
_shelx_SHELXL_version_number       '2014/7'
_audit_contact_author_address      ?
_audit_contact_author_email        ?
_audit_contact_author_name         ''
_audit_contact_author_phone        ?
_publ_contact_author_id_orcid      ?
_publ_section_references
;
Dolomanov, O.V., Bourhis, L.J., Gildea, R.J, Howard, J.A.K. & Puschmann, H.
 (2009), J. Appl. Cryst. 42, 339-341.

Sheldrick, G.M. (2008). Acta Cryst. A64, 112-122.
;
_chemical_name_common              ?
_chemical_name_systematic          ?
_chemical_formula_moiety           'C49 H46 B F15 N2 O, C3 H3'
_chemical_formula_sum              'C52 H49 B F15 N2 O'
_chemical_formula_weight           1013.74
_chemical_melting_point            ?
loop_
  _atom_type_symbol
  _atom_type_description
  _atom_type_scat_dispersion_real
  _atom_type_scat_dispersion_imag
  _atom_type_scat_source
 'C' 'C' 0.0033 0.0016 'International Tables Vol C Tables 4.2.6.8 and 6.1.1.4'
 'H' 'H' 0.0000 0.0000 'International Tables Vol C Tables 4.2.6.8 and 6.1.1.4'
 'B' 'B' 0.0013 0.0007 'International Tables Vol C Tables 4.2.6.8 and 6.1.1.4'
 'F' 'F' 0.0171 0.0103 'International Tables Vol C Tables 4.2.6.8 and 6.1.1.4'
 'N' 'N' 0.0061 0.0033 'International Tables Vol C Tables 4.2.6.8 and 6.1.1.4'
 'O' 'O' 0.0106 0.0060 'International Tables Vol C Tables 4.2.6.8 and 6.1.1.4'

_shelx_space_group_comment
;
The symmetry employed for this shelxl refinement is uniquely defined
by the following loop, which should always be used as a source of
symmetry information in preference to the above space-group names.
They are only intended as comments.
;
_space_group_crystal_system        'triclinic'
_space_group_IT_number             2
_space_group_name_H-M_alt          'P -1'
_space_group_name_Hall             '-P 1'
loop_
  _space_group_symop_operation_xyz
 'x, y, z'
 '-x, -y, -z'

_cell_length_a                     9.4393(13)
_cell_length_b                     14.568(2)
_cell_length_c                     17.814(3)
_cell_angle_alpha                  97.195(6)
_cell_angle_beta                   97.145(5)
_cell_angle_gamma                  99.872(5)
_cell_volume                       2367.6(6)
_cell_formula_units_Z              2
_cell_measurement_reflns_used      9978
_cell_measurement_temperature      100(2)
_cell_measurement_theta_max        30.93
_cell_measurement_theta_min        2.40
_shelx_estimated_absorpt_T_max     0.988
_shelx_estimated_absorpt_T_min     0.963
_exptl_absorpt_coefficient_mu      0.125
_exptl_absorpt_correction_T_max    0.7462
_exptl_absorpt_correction_T_min    0.6865
_exptl_absorpt_correction_type     multi-scan
_exptl_absorpt_process_details    
 'SADABS-2016/2 (Bruker,2016/2) was used for absorption correction. wR2(int) was 0.1094 before and 0.0723 after correction. The Ratio of minimum to maximum transmission is 0.9200. The \l/2 correction factor is Not present.'
_exptl_absorpt_special_details     ?
_exptl_crystal_colour              colourless
_exptl_crystal_colour_primary      colourless
_exptl_crystal_density_diffrn      1.422
_exptl_crystal_density_meas        ?
_exptl_crystal_density_method      ?
_exptl_crystal_description         block
_exptl_crystal_F_000               1046
_exptl_crystal_size_max            0.3
_exptl_crystal_size_mid            0.15
_exptl_crystal_size_min            0.1
_exptl_transmission_factor_max     ?
_exptl_transmission_factor_min     ?
_diffrn_reflns_av_R_equivalents    0.0813
_diffrn_reflns_av_unetI/netI       0.0392
_diffrn_reflns_Laue_measured_fraction_full  0.998
_diffrn_reflns_Laue_measured_fraction_max  0.994
_diffrn_reflns_limit_h_max         13
_diffrn_reflns_limit_h_min         -13
_diffrn_reflns_limit_k_max         21
_diffrn_reflns_limit_k_min         -21
_diffrn_reflns_limit_l_max         25
_diffrn_reflns_limit_l_min         -25
_diffrn_reflns_number              155747
_diffrn_reflns_point_group_measured_fraction_full  0.998
_diffrn_reflns_point_group_measured_fraction_max  0.994
_diffrn_reflns_theta_full          25.242
_diffrn_reflns_theta_max           31.100
_diffrn_reflns_theta_min           2.215
_diffrn_ambient_temperature        100.0
_diffrn_detector_area_resol_mean   ?
_diffrn_measured_fraction_theta_full  0.998
_diffrn_measured_fraction_theta_max  0.994
_diffrn_measurement_device_type    'Bruker APEX-II CCD'
_diffrn_measurement_method         '\f and \w scans'
_diffrn_radiation_type             MoK\a
_diffrn_radiation_wavelength       0.71073
_diffrn_source                     ?
_diffrn_standards_number           0
_reflns_Friedel_coverage           0.000
_reflns_Friedel_fraction_full      .
_reflns_Friedel_fraction_max       .
_reflns_number_gt                  11378
_reflns_number_total               15134
_reflns_special_details
;
 Reflections were merged by SHELXL according to the crystal
 class for the calculation of statistics and refinement.
 
 _reflns_Friedel_fraction is defined as the number of unique
 Friedel pairs measured divided by the number that would be
 possible theoretically, ignoring centric projections and
 systematic absences.
;
_reflns_threshold_expression       'I > 2\s(I)'
_computing_cell_refinement         'SAINT V8.40A (?, 2016)'
_computing_data_collection         ?
_computing_data_reduction          'SAINT V8.40A (?, 2016)'
_computing_molecular_graphics      'Olex2 1.5 (Dolomanov et al., 2009)'
_computing_publication_material    'Olex2 1.5 (Dolomanov et al., 2009)'
_computing_structure_refinement    'XL (Sheldrick, 2008)'
_computing_structure_solution      'SHELXT 2014/5 (Sheldrick, 2014)'
_refine_diff_density_max           0.534
_refine_diff_density_min           -0.544
_refine_diff_density_rms           0.134
_refine_ls_extinction_coef         .
_refine_ls_extinction_method       none
_refine_ls_goodness_of_fit_ref     1.090
_refine_ls_hydrogen_treatment      constr
_refine_ls_matrix_type             full
_refine_ls_number_parameters       648
_refine_ls_number_reflns           15134
_refine_ls_number_restraints       0
_refine_ls_R_factor_all            0.0841
_refine_ls_R_factor_gt             0.0572
_refine_ls_restrained_S_all        1.090
_refine_ls_shift/su_max            0.001
_refine_ls_shift/su_mean           0.000
_refine_ls_structure_factor_coef   Fsqd
_refine_ls_weighting_details      
 'w=1/[\s^2^(Fo^2^)+(0.0701P)^2^+1.5726P] where P=(Fo^2^+2Fc^2^)/3'
_refine_ls_weighting_scheme        calc
_refine_ls_wR_factor_gt            0.1425
_refine_ls_wR_factor_ref           0.1643
_refine_special_details            ?
_olex2_refinement_description
;
1.a Ternary CH refined with riding coordinates:
 C2(H2), C24(H24), C33(H33), C40(H40)
1.b Secondary CH2 refined with riding coordinates:
 C6(H6A,H6B), C7(H7A,H7B), C8(H8A,H8B), C9(H9A,H9B), C21(H21A,H21B), C22(H22A,
 H22B)
1.c Aromatic/amide H refined with riding coordinates:
 C27(H27), C28(H28), C29(H29), C36(H36), C37(H37), C38(H38), C51(H51),
 C52(H52), C53(H53)
1.d Idealised Me refined as rotating group:
 C1(H1A,H1B,H1C), C25(H25A,H25B,H25C), C26(H26A,H26B,H26C), C30(H30A,H30B,
 H30C), C34(H34A,H34B,H34C), C35(H35A,H35B,H35C), C41(H41A,H41B,H41C), C42(H42A,
 H42B,H42C)
;
_atom_sites_solution_hydrogens     geom
_atom_sites_solution_primary       ?
_atom_sites_solution_secondary     ?
loop_
  _atom_site_label
  _atom_site_type_symbol
  _atom_site_fract_x
  _atom_site_fract_y
  _atom_site_fract_z
  _atom_site_U_iso_or_equiv
  _atom_site_adp_type
  _atom_site_occupancy
  _atom_site_site_symmetry_order
  _atom_site_calc_flag
  _atom_site_refinement_flags_posn
  _atom_site_refinement_flags_adp
  _atom_site_refinement_flags_occupancy
  _atom_site_disorder_assembly
  _atom_site_disorder_group
 F1 F 1.19331(13) 1.01314(9) 0.99938(7) 0.0347(3) Uani 1 1 d . . . . .
 F2 F 0.30212(11) 0.97890(8) 0.75375(7) 0.0284(2) Uani 1 1 d . . . . .
 F3 F 0.36405(12) 0.86604(8) 0.86046(7) 0.0306(2) Uani 1 1 d . . . . .
 F4 F 0.46516(12) 0.99510(8) 0.63939(7) 0.0288(2) Uani 1 1 d . . . . .
 F5 F 0.69029(11) 0.91051(8) 0.63254(6) 0.0251(2) Uani 1 1 d . . . . .
 F6 F 0.73546(13) 0.70588(10) 0.45707(6) 0.0339(3) Uani 1 1 d . . . . .
 F7 F 1.02516(13) 0.74941(9) 0.45504(7) 0.0328(3) Uani 1 1 d . . . . .
 F8 F 1.11020(10) 0.80944(7) 0.72254(6) 0.0220(2) Uani 1 1 d . . . . .
 F9 F 1.21168(11) 0.79816(8) 0.59041(7) 0.0287(2) Uani 1 1 d . . . . .
 F10 F 0.62876(11) 0.71814(9) 0.58968(6) 0.0278(2) Uani 1 1 d . . . . .
 F11 F 0.95288(11) 0.96639(7) 0.74718(6) 0.0238(2) Uani 1 1 d . . . . .
 F12 F 1.13031(12) 1.07857(8) 0.86292(7) 0.0304(2) Uani 1 1 d . . . . .
 F13 F 1.06457(14) 0.83690(10) 1.01536(7) 0.0369(3) Uani 1 1 d . . . . .
 F14 F 0.88606(13) 0.72554(8) 0.90219(6) 0.0291(2) Uani 1 1 d . . . . .
 F15 F 0.58923(12) 0.77905(8) 0.85560(6) 0.0284(2) Uani 1 1 d . . . . .
 O1 O 0.72731(12) 0.68299(8) 0.75497(7) 0.0200(2) Uani 1 1 d . . . . .
 N1 N 0.27953(15) 0.37137(9) 0.75992(8) 0.0173(2) Uani 1 1 d . . . . .
 N2 N 0.41505(14) 0.26271(9) 0.75443(8) 0.0182(3) Uani 1 1 d . . . . .
 C1 C 0.0244(2) 0.37287(18) 0.91752(14) 0.0403(5) Uani 1 1 d . . . . .
 H1A H -0.0099 0.4281 0.9406 0.060 Uiso 1 1 calc GR . . . .
 H1B H 0.0134 0.3238 0.9504 0.060 Uiso 1 1 calc GR . . . .
 H1C H -0.0331 0.3488 0.8670 0.060 Uiso 1 1 calc GR . . . .
 C2 C 0.1859(2) 0.40102(14) 0.90889(11) 0.0283(4) Uani 1 1 d . . . . .
 H2 H 0.2169 0.3444 0.8830 0.034 Uiso 1 1 calc R . . . .
 C3 C 0.20431(19) 0.47692(13) 0.85836(10) 0.0243(3) Uani 1 1 d . . . . .
 C4 C 0.24087(17) 0.46091(11) 0.78477(10) 0.0195(3) Uani 1 1 d . . . . .
 C5 C 0.41139(17) 0.35230(11) 0.77632(9) 0.0175(3) Uani 1 1 d . . . . .
 C6 C 0.54361(19) 0.42238(12) 0.81532(10) 0.0223(3) Uani 1 1 d . . . . .
 H6A H 0.6220 0.3883 0.8308 0.027 Uiso 1 1 calc R . . . .
 H6B H 0.5200 0.4568 0.8623 0.027 Uiso 1 1 calc R . . . .
 C7 C 0.59901(19) 0.49379(13) 0.76383(11) 0.0241(3) Uani 1 1 d . . . . .
 H7A H 0.5841 0.4622 0.7102 0.029 Uiso 1 1 calc R . . . .
 H7B H 0.5427 0.5452 0.7662 0.029 Uiso 1 1 calc R . . . .
 C8 C 0.76001(19) 0.53491(13) 0.78939(11) 0.0241(3) Uani 1 1 d . . . . .
 H8A H 0.7763 0.5595 0.8448 0.029 Uiso 1 1 calc R . . . .
 H8B H 0.8171 0.4844 0.7814 0.029 Uiso 1 1 calc R . . . .
 C9 C 0.81307(19) 0.61378(13) 0.74552(11) 0.0239(3) Uani 1 1 d . . . . .
 H9A H 0.9164 0.6414 0.7651 0.029 Uiso 1 1 calc R . . . .
 H9B H 0.8051 0.5888 0.6906 0.029 Uiso 1 1 calc R . . . .
 B10 B 0.78797(19) 0.77803(13) 0.74382(11) 0.0181(3) Uani 1 1 d . . . . .
 C11 C 0.90808(17) 0.83977(12) 0.81756(9) 0.0185(3) Uani 1 1 d . . . . .
 C12 C 0.94265(18) 0.81189(12) 0.88781(10) 0.0219(3) Uani 1 1 d . . . . .
 C13 C 1.0376(2) 0.86871(14) 0.94798(10) 0.0257(4) Uani 1 1 d . . . . .
 C14 C 1.10233(19) 0.95805(14) 0.94077(10) 0.0252(4) Uani 1 1 d . . . . .
 C15 C 0.41247(17) 0.93179(12) 0.74999(11) 0.0221(3) Uani 1 1 d . . . . .
 C16 C 0.44495(18) 0.87523(13) 0.80373(10) 0.0225(3) Uani 1 1 d . . . . .
 C17 C 0.56162(18) 0.82959(12) 0.79899(10) 0.0205(3) Uani 1 1 d . . . . .
 C18 C 0.65055(17) 0.83595(12) 0.74203(10) 0.0191(3) Uani 1 1 d . . . . .
 C19 C 0.61255(17) 0.89447(12) 0.69012(10) 0.0197(3) Uani 1 1 d . . . . .
 C20 C 0.49660(18) 0.94094(12) 0.69268(10) 0.0210(3) Uani 1 1 d . . . . .
 C21 C 0.26978(17) 0.20959(12) 0.71715(10) 0.0197(3) Uani 1 1 d . . . . .
 H21A H 0.2356 0.1566 0.7443 0.024 Uiso 1 1 calc R . . . .
 H21B H 0.2711 0.1849 0.6629 0.024 Uiso 1 1 calc R . . . .
 C22 C 0.17383(18) 0.28530(12) 0.72402(10) 0.0204(3) Uani 1 1 d . . . . .
 H22A H 0.1261 0.2930 0.6731 0.024 Uiso 1 1 calc R . . . .
 H22B H 0.0984 0.2691 0.7567 0.024 Uiso 1 1 calc R . . . .
 C23 C 0.24553(18) 0.52866(12) 0.73537(11) 0.0227(3) Uani 1 1 d . . . . .
 C24 C 0.2661(2) 0.50702(14) 0.65232(11) 0.0270(4) Uani 1 1 d . . . . .
 H24 H 0.3075 0.4482 0.6459 0.032 Uiso 1 1 calc R . . . .
 C25 C 0.1170(2) 0.48855(17) 0.60170(14) 0.0385(5) Uani 1 1 d . . . . .
 H25A H 0.0531 0.4357 0.6168 0.058 Uiso 1 1 calc GR . . . .
 H25B H 0.1290 0.4731 0.5480 0.058 Uiso 1 1 calc GR . . . .
 H25C H 0.0737 0.5450 0.6080 0.058 Uiso 1 1 calc GR . . . .
 C26 C 0.3696(2) 0.58602(18) 0.62584(14) 0.0394(5) Uani 1 1 d . . . . .
 H26A H 0.3244 0.6417 0.6248 0.059 Uiso 1 1 calc GR . . . .
 H26B H 0.3891 0.5645 0.5744 0.059 Uiso 1 1 calc GR . . . .
 H26C H 0.4611 0.6022 0.6614 0.059 Uiso 1 1 calc GR . . . .
 C27 C 0.2221(2) 0.61754(13) 0.76457(13) 0.0306(4) Uani 1 1 d . . . . .
 H27 H 0.2271 0.6658 0.7332 0.037 Uiso 1 1 calc R . . . .
 C28 C 0.1919(2) 0.63652(14) 0.83804(14) 0.0346(5) Uani 1 1 d . . . . .
 H28 H 0.1795 0.6980 0.8572 0.042 Uiso 1 1 calc R . . . .
 C29 C 0.1796(2) 0.56700(15) 0.88384(13) 0.0328(4) Uani 1 1 d . . . . .
 H29 H 0.1540 0.5803 0.9334 0.039 Uiso 1 1 calc R . . . .
 C30 C 0.2799(3) 0.4308(2) 0.98756(13) 0.0443(6) Uani 1 1 d . . . . .
 H30A H 0.3815 0.4513 0.9810 0.066 Uiso 1 1 calc GR . . . .
 H30B H 0.2723 0.3773 1.0161 0.066 Uiso 1 1 calc GR . . . .
 H30C H 0.2460 0.4830 1.0158 0.066 Uiso 1 1 calc GR . . . .
 C31 C 0.54443(17) 0.22177(11) 0.75866(10) 0.0205(3) Uani 1 1 d . . . . .
 C32 C 0.58871(19) 0.18603(12) 0.82558(10) 0.0235(3) Uani 1 1 d . . . . .
 C33 C 0.5115(2) 0.19353(14) 0.89604(11) 0.0285(4) Uani 1 1 d . . . . .
 H33 H 0.4154 0.2114 0.8811 0.034 Uiso 1 1 calc R . . . .
 C34 C 0.6009(3) 0.26961(17) 0.95960(13) 0.0466(6) Uani 1 1 d . . . . .
 H34A H 0.5485 0.2743 1.0037 0.070 Uiso 1 1 calc GR . . . .
 H34B H 0.6160 0.3303 0.9407 0.070 Uiso 1 1 calc GR . . . .
 H34C H 0.6952 0.2528 0.9751 0.070 Uiso 1 1 calc GR . . . .
 C35 C 0.4854(3) 0.10111(17) 0.92930(14) 0.0399(5) Uani 1 1 d . . . . .
 H35A H 0.5790 0.0845 0.9467 0.060 Uiso 1 1 calc GR . . . .
 H35B H 0.4287 0.0508 0.8898 0.060 Uiso 1 1 calc GR . . . .
 H35C H 0.4317 0.1089 0.9726 0.060 Uiso 1 1 calc GR . . . .
 C36 C 0.7136(2) 0.14655(14) 0.82708(12) 0.0300(4) Uani 1 1 d . . . . .
 H36 H 0.7467 0.1211 0.8711 0.036 Uiso 1 1 calc R . . . .
 C37 C 0.7901(2) 0.14370(14) 0.76554(13) 0.0321(4) Uani 1 1 d . . . . .
 H37 H 0.8755 0.1172 0.7682 0.038 Uiso 1 1 calc R . . . .
 C38 C 0.7436(2) 0.17897(14) 0.70041(12) 0.0300(4) Uani 1 1 d . . . . .
 H38 H 0.7967 0.1758 0.6585 0.036 Uiso 1 1 calc R . . . .
 C39 C 0.61949(19) 0.21918(12) 0.69525(11) 0.0240(3) Uani 1 1 d . . . . .
 C40 C 0.5716(2) 0.25721(14) 0.62284(11) 0.0285(4) Uani 1 1 d . . . . .
 H40 H 0.4861 0.2873 0.6310 0.034 Uiso 1 1 calc R . . . .
 C41 C 0.6917(3) 0.33205(18) 0.60389(16) 0.0447(6) Uani 1 1 d . . . . .
 H41A H 0.7263 0.3809 0.6486 0.067 Uiso 1 1 calc GR . . . .
 H41B H 0.6530 0.3605 0.5607 0.067 Uiso 1 1 calc GR . . . .
 H41C H 0.7727 0.3025 0.5903 0.067 Uiso 1 1 calc GR . . . .
 C42 C 0.5239(3) 0.17733(18) 0.55512(13) 0.0424(5) Uani 1 1 d . . . . .
 H42A H 0.6049 0.1448 0.5476 0.064 Uiso 1 1 calc GR . . . .
 H42B H 0.4949 0.2035 0.5088 0.064 Uiso 1 1 calc GR . . . .
 H42C H 0.4414 0.1325 0.5657 0.064 Uiso 1 1 calc GR . . . .
 C43 C 0.86233(17) 0.77154(11) 0.66363(9) 0.0183(3) Uani 1 1 d . . . . .
 C44 C 0.77459(17) 0.74121(12) 0.59305(10) 0.0211(3) Uani 1 1 d . . . . .
 C45 C 0.8267(2) 0.73338(14) 0.52386(10) 0.0248(3) Uani 1 1 d . . . . .
 C46 C 0.97447(19) 0.75449(13) 0.52230(10) 0.0236(3) Uani 1 1 d . . . . .
 C47 C 1.06713(17) 0.77969(12) 0.59052(10) 0.0209(3) Uani 1 1 d . . . . .
 C48 C 1.00978(17) 0.78667(11) 0.65859(9) 0.0181(3) Uani 1 1 d . . . . .
 C49 C 0.97623(17) 0.93135(12) 0.81368(9) 0.0192(3) Uani 1 1 d . . . . .
 C50 C 1.07005(18) 0.99064(12) 0.87209(10) 0.0221(3) Uani 1 1 d . . . . .
 C51 C 0.8582(2) 1.00799(14) 0.50829(13) 0.0305(4) Uani 1 1 d . . . . .
 H51 H 0.7611 1.0132 0.5141 0.037 Uiso 1 1 calc R . . . .
 C52 C 0.8980(2) 0.99631(13) 0.43629(11) 0.0287(4) Uani 1 1 d . . . . .
 H52 H 0.8283 0.9940 0.3924 0.034 Uiso 1 1 calc R . . . .
 C53 C 1.0393(2) 0.98797(14) 0.42777(11) 0.0308(4) Uani 1 1 d . . . . .
 H53 H 1.0661 0.9795 0.3781 0.037 Uiso 1 1 calc R . . . .

loop_
  _atom_site_aniso_label
  _atom_site_aniso_U_11
  _atom_site_aniso_U_22
  _atom_site_aniso_U_33
  _atom_site_aniso_U_23
  _atom_site_aniso_U_13
  _atom_site_aniso_U_12
 F1 0.0269(6) 0.0432(7) 0.0267(6) -0.0088(5) -0.0026(4) 0.0013(5)
 F2 0.0186(5) 0.0243(5) 0.0449(7) 0.0054(5) 0.0067(4) 0.0099(4)
 F3 0.0295(6) 0.0312(6) 0.0375(6) 0.0092(5) 0.0193(5) 0.0105(5)
 F4 0.0252(5) 0.0289(6) 0.0345(6) 0.0140(5) -0.0012(4) 0.0086(4)
 F5 0.0231(5) 0.0308(6) 0.0257(5) 0.0126(4) 0.0078(4) 0.0074(4)
 F6 0.0271(6) 0.0525(8) 0.0191(5) -0.0036(5) -0.0011(4) 0.0088(5)
 F7 0.0325(6) 0.0438(7) 0.0241(5) -0.0003(5) 0.0126(4) 0.0108(5)
 F8 0.0154(4) 0.0238(5) 0.0252(5) -0.0001(4) -0.0008(4) 0.0054(4)
 F9 0.0168(5) 0.0343(6) 0.0360(6) 0.0007(5) 0.0096(4) 0.0068(4)
 F10 0.0162(5) 0.0401(6) 0.0239(5) 0.0022(5) 0.0011(4) 0.0001(4)
 F11 0.0279(5) 0.0203(5) 0.0239(5) 0.0073(4) 0.0013(4) 0.0056(4)
 F12 0.0289(5) 0.0209(5) 0.0381(6) -0.0021(5) 0.0055(5) 0.0001(4)
 F13 0.0416(7) 0.0462(7) 0.0199(5) 0.0083(5) -0.0062(5) 0.0053(6)
 F14 0.0357(6) 0.0275(6) 0.0234(5) 0.0104(4) 0.0002(4) 0.0021(5)
 F15 0.0329(6) 0.0341(6) 0.0261(5) 0.0155(5) 0.0115(4) 0.0154(5)
 O1 0.0175(5) 0.0188(5) 0.0248(6) 0.0058(5) 0.0041(4) 0.0040(4)
 N1 0.0193(6) 0.0155(6) 0.0187(6) 0.0036(5) 0.0048(5) 0.0055(5)
 N2 0.0169(6) 0.0138(6) 0.0236(7) 0.0023(5) 0.0015(5) 0.0036(5)
 C1 0.0364(11) 0.0424(12) 0.0418(12) 0.0071(10) 0.0156(9) -0.0011(9)
 C2 0.0336(9) 0.0310(9) 0.0202(8) 0.0020(7) 0.0094(7) 0.0033(7)
 C3 0.0232(8) 0.0236(8) 0.0253(8) -0.0017(7) 0.0069(6) 0.0041(6)
 C4 0.0186(7) 0.0169(7) 0.0242(8) 0.0020(6) 0.0056(6) 0.0059(6)
 C5 0.0203(7) 0.0161(7) 0.0181(7) 0.0051(6) 0.0062(5) 0.0045(5)
 C6 0.0220(8) 0.0207(8) 0.0233(8) 0.0041(6) 0.0015(6) 0.0026(6)
 C7 0.0226(8) 0.0239(8) 0.0271(8) 0.0082(7) 0.0029(6) 0.0053(6)
 C8 0.0211(7) 0.0235(8) 0.0281(9) 0.0070(7) 0.0013(6) 0.0050(6)
 C9 0.0213(8) 0.0225(8) 0.0296(9) 0.0065(7) 0.0049(6) 0.0061(6)
 B10 0.0164(7) 0.0184(8) 0.0201(8) 0.0044(6) 0.0027(6) 0.0036(6)
 C11 0.0157(7) 0.0208(7) 0.0206(7) 0.0043(6) 0.0033(5) 0.0071(6)
 C12 0.0215(7) 0.0233(8) 0.0221(8) 0.0049(6) 0.0029(6) 0.0071(6)
 C13 0.0251(8) 0.0351(10) 0.0184(8) 0.0044(7) 0.0014(6) 0.0113(7)
 C14 0.0187(7) 0.0323(9) 0.0215(8) -0.0061(7) 0.0003(6) 0.0057(7)
 C15 0.0144(7) 0.0187(7) 0.0329(9) 0.0009(6) 0.0025(6) 0.0050(6)
 C16 0.0192(7) 0.0234(8) 0.0259(8) 0.0034(7) 0.0088(6) 0.0035(6)
 C17 0.0205(7) 0.0206(8) 0.0218(8) 0.0064(6) 0.0039(6) 0.0051(6)
 C18 0.0155(7) 0.0197(7) 0.0221(7) 0.0040(6) 0.0020(5) 0.0033(6)
 C19 0.0158(7) 0.0218(8) 0.0211(7) 0.0050(6) 0.0024(6) 0.0016(6)
 C20 0.0178(7) 0.0192(7) 0.0245(8) 0.0058(6) -0.0022(6) 0.0017(6)
 C21 0.0186(7) 0.0167(7) 0.0221(8) 0.0002(6) -0.0006(6) 0.0032(6)
 C22 0.0180(7) 0.0205(8) 0.0217(8) 0.0010(6) 0.0003(6) 0.0047(6)
 C23 0.0186(7) 0.0194(8) 0.0319(9) 0.0068(7) 0.0043(6) 0.0059(6)
 C24 0.0254(8) 0.0300(9) 0.0285(9) 0.0130(7) 0.0035(7) 0.0077(7)
 C25 0.0359(11) 0.0384(12) 0.0391(12) 0.0084(9) -0.0056(9) 0.0073(9)
 C26 0.0348(11) 0.0469(13) 0.0383(11) 0.0226(10) 0.0042(9) 0.0021(9)
 C27 0.0244(8) 0.0194(8) 0.0500(12) 0.0081(8) 0.0039(8) 0.0084(7)
 C28 0.0255(9) 0.0213(9) 0.0555(13) -0.0058(8) 0.0057(8) 0.0087(7)
 C29 0.0291(9) 0.0305(10) 0.0368(11) -0.0087(8) 0.0096(8) 0.0068(8)
 C30 0.0455(13) 0.0562(15) 0.0253(10) 0.0056(10) 0.0030(9) -0.0045(11)
 C31 0.0176(7) 0.0145(7) 0.0283(8) -0.0001(6) 0.0004(6) 0.0048(5)
 C32 0.0229(8) 0.0169(7) 0.0265(8) -0.0013(6) -0.0053(6) 0.0025(6)
 C33 0.0317(9) 0.0292(9) 0.0230(8) 0.0027(7) -0.0027(7) 0.0075(7)
 C34 0.0728(17) 0.0322(11) 0.0285(11) -0.0003(9) 0.0048(11) -0.0018(11)
 C35 0.0438(12) 0.0359(11) 0.0387(12) 0.0096(9) 0.0031(9) 0.0032(9)
 C36 0.0286(9) 0.0253(9) 0.0328(10) -0.0007(7) -0.0092(7) 0.0097(7)
 C37 0.0222(8) 0.0272(9) 0.0440(11) -0.0051(8) -0.0048(8) 0.0116(7)
 C38 0.0236(8) 0.0275(9) 0.0393(11) -0.0017(8) 0.0057(7) 0.0098(7)
 C39 0.0216(8) 0.0188(8) 0.0317(9) 0.0015(7) 0.0039(6) 0.0057(6)
 C40 0.0309(9) 0.0293(9) 0.0314(9) 0.0092(8) 0.0128(7) 0.0130(7)
 C41 0.0478(13) 0.0383(12) 0.0576(15) 0.0160(11) 0.0302(12) 0.0122(10)
 C42 0.0608(15) 0.0395(12) 0.0296(10) 0.0057(9) 0.0016(10) 0.0202(11)
 C43 0.0170(7) 0.0178(7) 0.0207(7) 0.0036(6) 0.0034(6) 0.0038(5)
 C44 0.0157(7) 0.0247(8) 0.0224(8) 0.0024(6) 0.0027(6) 0.0033(6)
 C45 0.0244(8) 0.0295(9) 0.0198(8) 0.0001(7) 0.0013(6) 0.0072(7)
 C46 0.0255(8) 0.0259(8) 0.0217(8) 0.0013(6) 0.0088(6) 0.0093(7)
 C47 0.0168(7) 0.0192(7) 0.0280(8) 0.0013(6) 0.0059(6) 0.0066(6)
 C48 0.0168(7) 0.0157(7) 0.0215(7) 0.0005(6) 0.0012(6) 0.0051(5)
 C49 0.0187(7) 0.0209(7) 0.0196(7) 0.0034(6) 0.0029(6) 0.0081(6)
 C50 0.0182(7) 0.0208(8) 0.0268(8) -0.0011(6) 0.0057(6) 0.0037(6)
 C51 0.0213(8) 0.0282(9) 0.0425(11) 0.0042(8) 0.0069(7) 0.0054(7)
 C52 0.0317(9) 0.0224(8) 0.0297(9) 0.0062(7) -0.0053(7) 0.0042(7)
 C53 0.0408(11) 0.0283(9) 0.0242(9) 0.0047(7) 0.0117(8) 0.0032(8)

_geom_special_details
;
 All esds (except the esd in the dihedral angle between two l.s. planes)
 are estimated using the full covariance matrix.  The cell esds are taken
 into account individually in the estimation of esds in distances, angles
 and torsion angles; correlations between esds in cell parameters are only
 used when they are defined by crystal symmetry.  An approximate (isotropic)
 treatment of cell esds is used for estimating esds involving l.s. planes.
;
loop_
  _geom_bond_atom_site_label_1
  _geom_bond_atom_site_label_2
  _geom_bond_distance
  _geom_bond_site_symmetry_2
  _geom_bond_publ_flag
 F1 C14 1.343(2) . ?
 F2 C15 1.3460(18) . ?
 F3 C16 1.3465(19) . ?
 F4 C20 1.3452(19) . ?
 F5 C19 1.3540(19) . ?
 F6 C45 1.351(2) . ?
 F7 C46 1.343(2) . ?
 F8 C48 1.3547(18) . ?
 F9 C47 1.3450(19) . ?
 F10 C44 1.3517(19) . ?
 F11 C49 1.3555(19) . ?
 F12 C50 1.348(2) . ?
 F13 C13 1.351(2) . ?
 F14 C12 1.348(2) . ?
 F15 C17 1.3467(19) . ?
 O1 C9 1.404(2) . ?
 O1 B10 1.453(2) . ?
 N1 C4 1.446(2) . ?
 N1 C5 1.327(2) . ?
 N1 C22 1.479(2) . ?
 N2 C5 1.322(2) . ?
 N2 C21 1.484(2) . ?
 N2 C31 1.446(2) . ?
 C1 H1A 0.9800 . ?
 C1 H1B 0.9800 . ?
 C1 H1C 0.9800 . ?
 C1 C2 1.542(3) . ?
 C2 H2 1.0000 . ?
 C2 C3 1.512(3) . ?
 C2 C30 1.531(3) . ?
 C3 C4 1.398(2) . ?
 C3 C29 1.402(3) . ?
 C4 C23 1.401(2) . ?
 C5 C6 1.501(2) . ?
 C6 H6A 0.9900 . ?
 C6 H6B 0.9900 . ?
 C6 C7 1.539(2) . ?
 C7 H7A 0.9900 . ?
 C7 H7B 0.9900 . ?
 C7 C8 1.524(2) . ?
 C8 H8A 0.9900 . ?
 C8 H8B 0.9900 . ?
 C8 C9 1.519(2) . ?
 C9 H9A 0.9900 . ?
 C9 H9B 0.9900 . ?
 B10 C11 1.674(2) . ?
 B10 C18 1.664(2) . ?
 B10 C43 1.668(2) . ?
 C11 C12 1.382(2) . ?
 C11 C49 1.392(2) . ?
 C12 C13 1.386(3) . ?
 C13 C14 1.368(3) . ?
 C14 C50 1.385(3) . ?
 C15 C16 1.378(3) . ?
 C15 C20 1.375(3) . ?
 C16 C17 1.386(2) . ?
 C17 C18 1.397(2) . ?
 C18 C19 1.389(2) . ?
 C19 C20 1.385(2) . ?
 C21 H21A 0.9900 . ?
 C21 H21B 0.9900 . ?
 C21 C22 1.545(2) . ?
 C22 H22A 0.9900 . ?
 C22 H22B 0.9900 . ?
 C23 C24 1.517(3) . ?
 C23 C27 1.398(3) . ?
 C24 H24 1.0000 . ?
 C24 C25 1.537(3) . ?
 C24 C26 1.538(3) . ?
 C25 H25A 0.9800 . ?
 C25 H25B 0.9800 . ?
 C25 H25C 0.9800 . ?
 C26 H26A 0.9800 . ?
 C26 H26B 0.9800 . ?
 C26 H26C 0.9800 . ?
 C27 H27 0.9500 . ?
 C27 C28 1.378(3) . ?
 C28 H28 0.9500 . ?
 C28 C29 1.377(3) . ?
 C29 H29 0.9500 . ?
 C30 H30A 0.9800 . ?
 C30 H30B 0.9800 . ?
 C30 H30C 0.9800 . ?
 C31 C32 1.405(2) . ?
 C31 C39 1.406(3) . ?
 C32 C33 1.529(3) . ?
 C32 C36 1.396(2) . ?
 C33 H33 1.0000 . ?
 C33 C34 1.533(3) . ?
 C33 C35 1.532(3) . ?
 C34 H34A 0.9800 . ?
 C34 H34B 0.9800 . ?
 C34 H34C 0.9800 . ?
 C35 H35A 0.9800 . ?
 C35 H35B 0.9800 . ?
 C35 H35C 0.9800 . ?
 C36 H36 0.9500 . ?
 C36 C37 1.386(3) . ?
 C37 H37 0.9500 . ?
 C37 C38 1.380(3) . ?
 C38 H38 0.9500 . ?
 C38 C39 1.395(2) . ?
 C39 C40 1.515(3) . ?
 C40 H40 1.0000 . ?
 C40 C41 1.534(3) . ?
 C40 C42 1.532(3) . ?
 C41 H41A 0.9800 . ?
 C41 H41B 0.9800 . ?
 C41 H41C 0.9800 . ?
 C42 H42A 0.9800 . ?
 C42 H42B 0.9800 . ?
 C42 H42C 0.9800 . ?
 C43 C44 1.392(2) . ?
 C43 C48 1.387(2) . ?
 C44 C45 1.382(2) . ?
 C45 C46 1.380(3) . ?
 C46 C47 1.375(3) . ?
 C47 C48 1.387(2) . ?
 C49 C50 1.377(2) . ?
 C51 H51 0.9500 . ?
 C51 C52 1.379(3) . ?
 C51 C53 1.388(3) 2_776 ?
 C52 H52 0.9500 . ?
 C52 C53 1.385(3) . ?
 C53 C51 1.388(3) 2_776 ?
 C53 H53 0.9500 . ?

loop_
  _geom_angle_atom_site_label_1
  _geom_angle_atom_site_label_2
  _geom_angle_atom_site_label_3
  _geom_angle
  _geom_angle_site_symmetry_1
  _geom_angle_site_symmetry_3
  _geom_angle_publ_flag
 C9 O1 B10 117.96(13) . . ?
 C4 N1 C22 124.46(13) . . ?
 C5 N1 C4 123.94(14) . . ?
 C5 N1 C22 110.94(13) . . ?
 C5 N2 C21 111.20(13) . . ?
 C5 N2 C31 125.50(14) . . ?
 C31 N2 C21 123.05(13) . . ?
 H1A C1 H1B 109.5 . . ?
 H1A C1 H1C 109.5 . . ?
 H1B C1 H1C 109.5 . . ?
 C2 C1 H1A 109.5 . . ?
 C2 C1 H1B 109.5 . . ?
 C2 C1 H1C 109.5 . . ?
 C1 C2 H2 107.9 . . ?
 C3 C2 C1 109.99(17) . . ?
 C3 C2 H2 107.9 . . ?
 C3 C2 C30 112.45(18) . . ?
 C30 C2 C1 110.50(17) . . ?
 C30 C2 H2 107.9 . . ?
 C4 C3 C2 122.81(16) . . ?
 C4 C3 C29 117.25(18) . . ?
 C29 C3 C2 119.90(17) . . ?
 C3 C4 N1 118.15(15) . . ?
 C3 C4 C23 122.87(16) . . ?
 C23 C4 N1 118.96(15) . . ?
 N1 C5 C6 125.21(15) . . ?
 N2 C5 N1 112.29(15) . . ?
 N2 C5 C6 122.50(14) . . ?
 C5 C6 H6A 109.1 . . ?
 C5 C6 H6B 109.1 . . ?
 C5 C6 C7 112.59(14) . . ?
 H6A C6 H6B 107.8 . . ?
 C7 C6 H6A 109.1 . . ?
 C7 C6 H6B 109.1 . . ?
 C6 C7 H7A 109.5 . . ?
 C6 C7 H7B 109.5 . . ?
 H7A C7 H7B 108.1 . . ?
 C8 C7 C6 110.69(14) . . ?
 C8 C7 H7A 109.5 . . ?
 C8 C7 H7B 109.5 . . ?
 C7 C8 H8A 109.3 . . ?
 C7 C8 H8B 109.3 . . ?
 H8A C8 H8B 107.9 . . ?
 C9 C8 C7 111.68(14) . . ?
 C9 C8 H8A 109.3 . . ?
 C9 C8 H8B 109.3 . . ?
 O1 C9 C8 108.59(14) . . ?
 O1 C9 H9A 110.0 . . ?
 O1 C9 H9B 110.0 . . ?
 C8 C9 H9A 110.0 . . ?
 C8 C9 H9B 110.0 . . ?
 H9A C9 H9B 108.4 . . ?
 O1 B10 C11 114.42(13) . . ?
 O1 B10 C18 105.70(13) . . ?
 O1 B10 C43 108.33(13) . . ?
 C18 B10 C11 103.20(13) . . ?
 C18 B10 C43 114.36(13) . . ?
 C43 B10 C11 110.82(13) . . ?
 C12 C11 B10 126.41(15) . . ?
 C12 C11 C49 113.21(15) . . ?
 C49 C11 B10 120.21(14) . . ?
 F14 C12 C11 121.50(16) . . ?
 F14 C12 C13 115.05(15) . . ?
 C11 C12 C13 123.44(17) . . ?
 F13 C13 C12 120.00(17) . . ?
 F13 C13 C14 119.16(17) . . ?
 C14 C13 C12 120.83(16) . . ?
 F1 C14 C13 120.65(17) . . ?
 F1 C14 C50 120.91(18) . . ?
 C13 C14 C50 118.44(16) . . ?
 F2 C15 C16 121.09(16) . . ?
 F2 C15 C20 120.02(16) . . ?
 C20 C15 C16 118.88(15) . . ?
 F3 C16 C15 119.55(15) . . ?
 F3 C16 C17 121.04(16) . . ?
 C15 C16 C17 119.40(15) . . ?
 F15 C17 C16 115.40(15) . . ?
 F15 C17 C18 120.28(14) . . ?
 C16 C17 C18 124.29(15) . . ?
 C17 C18 B10 119.15(14) . . ?
 C19 C18 B10 127.47(15) . . ?
 C19 C18 C17 113.36(14) . . ?
 F5 C19 C18 120.92(14) . . ?
 F5 C19 C20 114.97(14) . . ?
 C20 C19 C18 124.11(15) . . ?
 F4 C20 C15 119.51(15) . . ?
 F4 C20 C19 120.54(16) . . ?
 C15 C20 C19 119.95(15) . . ?
 N2 C21 H21A 111.3 . . ?
 N2 C21 H21B 111.3 . . ?
 N2 C21 C22 102.49(13) . . ?
 H21A C21 H21B 109.2 . . ?
 C22 C21 H21A 111.3 . . ?
 C22 C21 H21B 111.3 . . ?
 N1 C22 C21 102.97(12) . . ?
 N1 C22 H22A 111.2 . . ?
 N1 C22 H22B 111.2 . . ?
 C21 C22 H22A 111.2 . . ?
 C21 C22 H22B 111.2 . . ?
 H22A C22 H22B 109.1 . . ?
 C4 C23 C24 122.64(15) . . ?
 C27 C23 C4 117.01(17) . . ?
 C27 C23 C24 120.26(17) . . ?
 C23 C24 H24 108.3 . . ?
 C23 C24 C25 108.90(16) . . ?
 C23 C24 C26 113.36(18) . . ?
 C25 C24 H24 108.3 . . ?
 C25 C24 C26 109.67(16) . . ?
 C26 C24 H24 108.3 . . ?
 C24 C25 H25A 109.5 . . ?
 C24 C25 H25B 109.5 . . ?
 C24 C25 H25C 109.5 . . ?
 H25A C25 H25B 109.5 . . ?
 H25A C25 H25C 109.5 . . ?
 H25B C25 H25C 109.5 . . ?
 C24 C26 H26A 109.5 . . ?
 C24 C26 H26B 109.5 . . ?
 C24 C26 H26C 109.5 . . ?
 H26A C26 H26B 109.5 . . ?
 H26A C26 H26C 109.5 . . ?
 H26B C26 H26C 109.5 . . ?
 C23 C27 H27 119.4 . . ?
 C28 C27 C23 121.25(19) . . ?
 C28 C27 H27 119.4 . . ?
 C27 C28 H28 119.8 . . ?
 C29 C28 C27 120.49(18) . . ?
 C29 C28 H28 119.8 . . ?
 C3 C29 H29 119.5 . . ?
 C28 C29 C3 120.94(19) . . ?
 C28 C29 H29 119.5 . . ?
 C2 C30 H30A 109.5 . . ?
 C2 C30 H30B 109.5 . . ?
 C2 C30 H30C 109.5 . . ?
 H30A C30 H30B 109.5 . . ?
 H30A C30 H30C 109.5 . . ?
 H30B C30 H30C 109.5 . . ?
 C32 C31 N2 118.58(15) . . ?
 C32 C31 C39 123.12(15) . . ?
 C39 C31 N2 118.30(15) . . ?
 C31 C32 C33 123.01(15) . . ?
 C36 C32 C31 116.73(18) . . ?
 C36 C32 C33 120.18(17) . . ?
 C32 C33 H33 108.5 . . ?
 C32 C33 C34 110.78(18) . . ?
 C32 C33 C35 112.82(17) . . ?
 C34 C33 H33 108.5 . . ?
 C35 C33 H33 108.5 . . ?
 C35 C33 C34 107.52(17) . . ?
 C33 C34 H34A 109.5 . . ?
 C33 C34 H34B 109.5 . . ?
 C33 C34 H34C 109.5 . . ?
 H34A C34 H34B 109.5 . . ?
 H34A C34 H34C 109.5 . . ?
 H34B C34 H34C 109.5 . . ?
 C33 C35 H35A 109.5 . . ?
 C33 C35 H35B 109.5 . . ?
 C33 C35 H35C 109.5 . . ?
 H35A C35 H35B 109.5 . . ?
 H35A C35 H35C 109.5 . . ?
 H35B C35 H35C 109.5 . . ?
 C32 C36 H36 119.3 . . ?
 C37 C36 C32 121.31(18) . . ?
 C37 C36 H36 119.3 . . ?
 C36 C37 H37 119.7 . . ?
 C38 C37 C36 120.64(17) . . ?
 C38 C37 H37 119.7 . . ?
 C37 C38 H38 119.6 . . ?
 C37 C38 C39 120.86(19) . . ?
 C39 C38 H38 119.6 . . ?
 C31 C39 C40 123.26(15) . . ?
 C38 C39 C31 117.35(17) . . ?
 C38 C39 C40 119.39(17) . . ?
 C39 C40 H40 108.1 . . ?
 C39 C40 C41 111.90(18) . . ?
 C39 C40 C42 110.78(16) . . ?
 C41 C40 H40 108.1 . . ?
 C42 C40 H40 108.1 . . ?
 C42 C40 C41 109.80(19) . . ?
 C40 C41 H41A 109.5 . . ?
 C40 C41 H41B 109.5 . . ?
 C40 C41 H41C 109.5 . . ?
 H41A C41 H41B 109.5 . . ?
 H41A C41 H41C 109.5 . . ?
 H41B C41 H41C 109.5 . . ?
 C40 C42 H42A 109.5 . . ?
 C40 C42 H42B 109.5 . . ?
 C40 C42 H42C 109.5 . . ?
 H42A C42 H42B 109.5 . . ?
 H42A C42 H42C 109.5 . . ?
 H42B C42 H42C 109.5 . . ?
 C44 C43 B10 120.12(14) . . ?
 C48 C43 B10 126.43(14) . . ?
 C48 C43 C44 113.25(15) . . ?
 F10 C44 C43 119.76(15) . . ?
 F10 C44 C45 116.16(15) . . ?
 C45 C44 C43 124.07(15) . . ?
 F6 C45 C44 121.22(16) . . ?
 F6 C45 C46 118.94(16) . . ?
 C46 C45 C44 119.84(16) . . ?
 F7 C46 C45 119.97(16) . . ?
 F7 C46 C47 121.32(16) . . ?
 C47 C46 C45 118.71(16) . . ?
 F9 C47 C46 119.71(15) . . ?
 F9 C47 C48 120.94(15) . . ?
 C46 C47 C48 119.35(15) . . ?
 F8 C48 C43 120.75(15) . . ?
 F8 C48 C47 114.69(14) . . ?
 C43 C48 C47 124.56(15) . . ?
 F11 C49 C11 118.84(15) . . ?
 F11 C49 C50 115.75(15) . . ?
 C50 C49 C11 125.39(16) . . ?
 F12 C50 C14 120.30(16) . . ?
 F12 C50 C49 121.03(16) . . ?
 C49 C50 C14 118.68(16) . . ?
 C52 C51 H51 120.1 . . ?
 C52 C51 C53 119.72(18) . 2_776 ?
 C53 C51 H51 120.1 2_776 . ?
 C51 C52 H52 119.9 . . ?
 C51 C52 C53 120.18(18) . . ?
 C53 C52 H52 119.9 . . ?
 C51 C53 H53 119.9 2_776 . ?
 C52 C53 C51 120.10(18) . 2_776 ?
 C52 C53 H53 119.9 . . ?

loop_
  _geom_torsion_atom_site_label_1
  _geom_torsion_atom_site_label_2
  _geom_torsion_atom_site_label_3
  _geom_torsion_atom_site_label_4
  _geom_torsion
  _geom_torsion_site_symmetry_1
  _geom_torsion_site_symmetry_2
  _geom_torsion_site_symmetry_3
  _geom_torsion_site_symmetry_4
  _geom_torsion_publ_flag
 F1 C14 C50 F12 0.3(2) . . . . ?
 F1 C14 C50 C49 179.92(15) . . . . ?
 F2 C15 C16 F3 0.8(3) . . . . ?
 F2 C15 C16 C17 -178.47(16) . . . . ?
 F2 C15 C20 F4 -1.9(2) . . . . ?
 F2 C15 C20 C19 178.23(15) . . . . ?
 F3 C16 C17 F15 -1.9(2) . . . . ?
 F3 C16 C17 C18 -179.83(16) . . . . ?
 F5 C19 C20 F4 1.8(2) . . . . ?
 F5 C19 C20 C15 -178.27(15) . . . . ?
 F6 C45 C46 F7 1.4(3) . . . . ?
 F6 C45 C46 C47 -178.06(16) . . . . ?
 F7 C46 C47 F9 -1.2(3) . . . . ?
 F7 C46 C47 C48 178.15(16) . . . . ?
 F9 C47 C48 F8 -2.4(2) . . . . ?
 F9 C47 C48 C43 178.05(15) . . . . ?
 F10 C44 C45 F6 1.2(3) . . . . ?
 F10 C44 C45 C46 -179.22(16) . . . . ?
 F11 C49 C50 F12 1.7(2) . . . . ?
 F11 C49 C50 C14 -177.92(14) . . . . ?
 F13 C13 C14 F1 1.0(3) . . . . ?
 F13 C13 C14 C50 -178.03(16) . . . . ?
 F14 C12 C13 F13 -1.5(2) . . . . ?
 F14 C12 C13 C14 -179.92(15) . . . . ?
 F15 C17 C18 B10 1.6(2) . . . . ?
 F15 C17 C18 C19 -176.82(15) . . . . ?
 O1 B10 C11 C12 -6.1(2) . . . . ?
 O1 B10 C11 C49 178.88(14) . . . . ?
 O1 B10 C18 C17 48.0(2) . . . . ?
 O1 B10 C18 C19 -133.77(17) . . . . ?
 O1 B10 C43 C44 67.35(19) . . . . ?
 O1 B10 C43 C48 -107.13(18) . . . . ?
 N1 C4 C23 C24 9.9(2) . . . . ?
 N1 C4 C23 C27 -173.52(15) . . . . ?
 N1 C5 C6 C7 -71.0(2) . . . . ?
 N2 C5 C6 C7 109.20(18) . . . . ?
 N2 C21 C22 N1 3.18(16) . . . . ?
 N2 C31 C32 C33 -3.7(2) . . . . ?
 N2 C31 C32 C36 179.57(15) . . . . ?
 N2 C31 C39 C38 -179.69(16) . . . . ?
 N2 C31 C39 C40 0.1(3) . . . . ?
 C1 C2 C3 C4 -110.2(2) . . . . ?
 C1 C2 C3 C29 67.6(2) . . . . ?
 C2 C3 C4 N1 -7.6(3) . . . . ?
 C2 C3 C4 C23 174.26(17) . . . . ?
 C2 C3 C29 C28 -178.28(18) . . . . ?
 C3 C4 C23 C24 -171.94(16) . . . . ?
 C3 C4 C23 C27 4.6(3) . . . . ?
 C4 N1 C5 N2 172.95(14) . . . . ?
 C4 N1 C5 C6 -6.9(2) . . . . ?
 C4 N1 C22 C21 -174.23(14) . . . . ?
 C4 C3 C29 C28 -0.4(3) . . . . ?
 C4 C23 C24 C25 98.8(2) . . . . ?
 C4 C23 C24 C26 -138.82(18) . . . . ?
 C4 C23 C27 C28 -1.7(3) . . . . ?
 C5 N1 C4 C3 -83.3(2) . . . . ?
 C5 N1 C4 C23 94.9(2) . . . . ?
 C5 N1 C22 C21 -3.23(18) . . . . ?
 C5 N2 C21 C22 -2.39(18) . . . . ?
 C5 N2 C31 C32 89.8(2) . . . . ?
 C5 N2 C31 C39 -90.6(2) . . . . ?
 C5 C6 C7 C8 -156.19(15) . . . . ?
 C6 C7 C8 C9 -173.33(15) . . . . ?
 C7 C8 C9 O1 56.6(2) . . . . ?
 C9 O1 B10 C11 -78.01(18) . . . . ?
 C9 O1 B10 C18 169.15(14) . . . . ?
 C9 O1 B10 C43 46.16(18) . . . . ?
 B10 O1 C9 C8 157.29(14) . . . . ?
 B10 C11 C12 F14 4.3(3) . . . . ?
 B10 C11 C12 C13 -176.39(16) . . . . ?
 B10 C11 C49 F11 -5.4(2) . . . . ?
 B10 C11 C49 C50 176.02(15) . . . . ?
 B10 C18 C19 F5 -0.2(3) . . . . ?
 B10 C18 C19 C20 -179.56(16) . . . . ?
 B10 C43 C44 F10 0.8(2) . . . . ?
 B10 C43 C44 C45 -179.79(16) . . . . ?
 B10 C43 C48 F8 -0.2(2) . . . . ?
 B10 C43 C48 C47 179.38(15) . . . . ?
 C11 B10 C18 C17 -72.43(18) . . . . ?
 C11 B10 C18 C19 105.77(19) . . . . ?
 C11 B10 C43 C44 -166.36(14) . . . . ?
 C11 B10 C43 C48 19.2(2) . . . . ?
 C11 C12 C13 F13 179.14(16) . . . . ?
 C11 C12 C13 C14 0.7(3) . . . . ?
 C11 C49 C50 F12 -179.69(15) . . . . ?
 C11 C49 C50 C14 0.7(3) . . . . ?
 C12 C11 C49 F11 178.92(14) . . . . ?
 C12 C11 C49 C50 0.4(2) . . . . ?
 C12 C13 C14 F1 179.45(16) . . . . ?
 C12 C13 C14 C50 0.4(3) . . . . ?
 C13 C14 C50 F12 179.31(15) . . . . ?
 C13 C14 C50 C49 -1.0(2) . . . . ?
 C15 C16 C17 F15 177.31(16) . . . . ?
 C15 C16 C17 C18 -0.6(3) . . . . ?
 C16 C15 C20 F4 179.29(16) . . . . ?
 C16 C15 C20 C19 -0.6(3) . . . . ?
 C16 C17 C18 B10 179.45(16) . . . . ?
 C16 C17 C18 C19 1.0(3) . . . . ?
 C17 C18 C19 F5 178.12(15) . . . . ?
 C17 C18 C19 C20 -1.3(3) . . . . ?
 C18 B10 C11 C12 108.20(17) . . . . ?
 C18 B10 C11 C49 -66.81(18) . . . . ?
 C18 B10 C43 C44 -50.2(2) . . . . ?
 C18 B10 C43 C48 135.29(16) . . . . ?
 C18 C19 C20 F4 -178.76(16) . . . . ?
 C18 C19 C20 C15 1.2(3) . . . . ?
 C20 C15 C16 F3 179.60(16) . . . . ?
 C20 C15 C16 C17 0.4(3) . . . . ?
 C21 N2 C5 N1 0.44(19) . . . . ?
 C21 N2 C5 C6 -179.70(15) . . . . ?
 C21 N2 C31 C32 -96.56(19) . . . . ?
 C21 N2 C31 C39 83.1(2) . . . . ?
 C22 N1 C4 C3 86.5(2) . . . . ?
 C22 N1 C4 C23 -95.27(19) . . . . ?
 C22 N1 C5 N2 1.89(19) . . . . ?
 C22 N1 C5 C6 -177.96(15) . . . . ?
 C23 C27 C28 C29 -2.0(3) . . . . ?
 C24 C23 C27 C28 174.91(18) . . . . ?
 C27 C23 C24 C25 -77.6(2) . . . . ?
 C27 C23 C24 C26 44.7(2) . . . . ?
 C27 C28 C29 C3 3.1(3) . . . . ?
 C29 C3 C4 N1 174.55(16) . . . . ?
 C29 C3 C4 C23 -3.6(3) . . . . ?
 C30 C2 C3 C4 126.2(2) . . . . ?
 C30 C2 C3 C29 -56.0(2) . . . . ?
 C31 N2 C5 N1 174.76(15) . . . . ?
 C31 N2 C5 C6 -5.4(3) . . . . ?
 C31 N2 C21 C22 -176.87(15) . . . . ?
 C31 C32 C33 C34 -104.7(2) . . . . ?
 C31 C32 C33 C35 134.68(19) . . . . ?
 C31 C32 C36 C37 0.5(3) . . . . ?
 C31 C39 C40 C41 123.33(19) . . . . ?
 C31 C39 C40 C42 -113.8(2) . . . . ?
 C32 C31 C39 C38 -0.1(3) . . . . ?
 C32 C31 C39 C40 179.68(17) . . . . ?
 C32 C36 C37 C38 -0.8(3) . . . . ?
 C33 C32 C36 C37 -176.36(18) . . . . ?
 C36 C32 C33 C34 71.9(2) . . . . ?
 C36 C32 C33 C35 -48.7(2) . . . . ?
 C36 C37 C38 C39 0.7(3) . . . . ?
 C37 C38 C39 C31 -0.3(3) . . . . ?
 C37 C38 C39 C40 179.98(18) . . . . ?
 C38 C39 C40 C41 -56.9(2) . . . . ?
 C38 C39 C40 C42 65.9(2) . . . . ?
 C39 C31 C32 C33 176.71(17) . . . . ?
 C39 C31 C32 C36 -0.1(3) . . . . ?
 C43 B10 C11 C12 -128.94(17) . . . . ?
 C43 B10 C11 C49 56.05(19) . . . . ?
 C43 B10 C18 C17 167.11(15) . . . . ?
 C43 B10 C18 C19 -14.7(2) . . . . ?
 C43 C44 C45 F6 -178.20(17) . . . . ?
 C43 C44 C45 C46 1.4(3) . . . . ?
 C44 C43 C48 F8 -174.96(14) . . . . ?
 C44 C43 C48 C47 4.6(2) . . . . ?
 C44 C45 C46 F7 -178.19(17) . . . . ?
 C44 C45 C46 C47 2.4(3) . . . . ?
 C45 C46 C47 F9 178.26(16) . . . . ?
 C45 C46 C47 C48 -2.4(3) . . . . ?
 C46 C47 C48 F8 178.31(15) . . . . ?
 C46 C47 C48 C43 -1.3(3) . . . . ?
 C48 C43 C44 F10 175.98(15) . . . . ?
 C48 C43 C44 C45 -4.6(3) . . . . ?
 C49 C11 C12 F14 179.62(14) . . . . ?
 C49 C11 C12 C13 -1.1(2) . . . . ?
 C51 C52 C53 C51 -0.5(3) . . . 2_776 ?
 C53 C51 C52 C53 0.5(3) 2_776 . . . ?

_shelx_res_file
;
    mo_gar_78_0m_a.res created by SHELXL-2014/7

TITL mo_gar_78_0m_a.res in P-1
CELL 0.71073 9.4393 14.5684 17.8136 97.195 97.145 99.872
ZERR 2 0.0013 0.0022 0.0028 0.006 0.005 0.005
LATT 1
SFAC C H B F N O
UNIT 104 98 2 30 4 2

L.S. 4
PLAN  -5 0 0
SIZE 0.1 0.15 0.3
TEMP -173.15
HTAB
BOND $H
CONF
fmap 2
acta
REM <olex2.extras>
REM <HklSrc "%.\\mo_gar_78_0m_a.hkl">
REM </olex2.extras>

WGHT    0.070100    1.572600
FVAR       0.64652
F1    4    1.193308    1.013144    0.999382    11.00000    0.02689    0.04317 =
         0.02673   -0.00885   -0.00261    0.00126
F2    4    0.302117    0.978902    0.753749    11.00000    0.01862    0.02435 =
         0.04492    0.00537    0.00668    0.00990
F3    4    0.364055    0.866039    0.860456    11.00000    0.02948    0.03124 =
         0.03746    0.00921    0.01934    0.01051
F4    4    0.465164    0.995097    0.639390    11.00000    0.02522    0.02889 =
         0.03448    0.01397   -0.00120    0.00864
F5    4    0.690289    0.910507    0.632545    11.00000    0.02307    0.03077 =
         0.02567    0.01262    0.00783    0.00741
F6    4    0.735462    0.705877    0.457072    11.00000    0.02711    0.05248 =
         0.01906   -0.00358   -0.00113    0.00883
F7    4    1.025158    0.749414    0.455037    11.00000    0.03247    0.04376 =
         0.02410   -0.00032    0.01259    0.01082
F8    4    1.110198    0.809443    0.722543    11.00000    0.01542    0.02380 =
         0.02524   -0.00013   -0.00084    0.00542
F9    4    1.211679    0.798160    0.590407    11.00000    0.01677    0.03434 =
         0.03597    0.00067    0.00958    0.00681
F10   4    0.628763    0.718141    0.589685    11.00000    0.01622    0.04013 =
         0.02394    0.00219    0.00113    0.00013
F11   4    0.952877    0.966390    0.747182    11.00000    0.02786    0.02033 =
         0.02385    0.00729    0.00129    0.00555
F12   4    1.130309    1.078573    0.862918    11.00000    0.02892    0.02088 =
         0.03810   -0.00213    0.00550    0.00007
F13   4    1.064570    0.836899    1.015361    11.00000    0.04156    0.04618 =
         0.01989    0.00833   -0.00623    0.00526
F14   4    0.886064    0.725543    0.902191    11.00000    0.03575    0.02748 =
         0.02338    0.01043    0.00019    0.00209
F15   4    0.589228    0.779046    0.855605    11.00000    0.03285    0.03414 =
         0.02608    0.01548    0.01154    0.01537
O1    6    0.727309    0.682985    0.754968    11.00000    0.01750    0.01885 =
         0.02477    0.00583    0.00413    0.00405
N1    5    0.279527    0.371366    0.759922    11.00000    0.01926    0.01551 =
         0.01869    0.00358    0.00481    0.00548
N2    5    0.415050    0.262710    0.754432    11.00000    0.01686    0.01380 =
         0.02364    0.00230    0.00146    0.00361
C1    1    0.024364    0.372871    0.917519    11.00000    0.03638    0.04243 =
         0.04175    0.00715    0.01558   -0.00115
AFIX 137
H1A   2   -0.009881    0.428107    0.940596    11.00000   -1.50000
H1B   2    0.013422    0.323771    0.950413    11.00000   -1.50000
H1C   2   -0.033139    0.348845    0.867037    11.00000   -1.50000
AFIX   0
C2    1    0.185923    0.401018    0.908885    11.00000    0.03361    0.03097 =
         0.02018    0.00204    0.00939    0.00330
AFIX  13
H2    2    0.216899    0.344358    0.883031    11.00000   -1.20000
AFIX   0
C3    1    0.204310    0.476921    0.858361    11.00000    0.02322    0.02361 =
         0.02530   -0.00172    0.00694    0.00408
C4    1    0.240867    0.460908    0.784770    11.00000    0.01855    0.01693 =
         0.02415    0.00203    0.00563    0.00590
C5    1    0.411387    0.352296    0.776318    11.00000    0.02030    0.01610 =
         0.01812    0.00514    0.00620    0.00451
C6    1    0.543613    0.422383    0.815322    11.00000    0.02201    0.02068 =
         0.02332    0.00412    0.00146    0.00261
AFIX  23
H6A   2    0.621966    0.388266    0.830842    11.00000   -1.20000
H6B   2    0.520012    0.456817    0.862264    11.00000   -1.20000
AFIX   0
C7    1    0.599013    0.493792    0.763833    11.00000    0.02260    0.02387 =
         0.02710    0.00822    0.00287    0.00527
AFIX  23
H7A   2    0.584101    0.462195    0.710153    11.00000   -1.20000
H7B   2    0.542727    0.545244    0.766164    11.00000   -1.20000
AFIX   0
C8    1    0.760011    0.534909    0.789390    11.00000    0.02109    0.02346 =
         0.02811    0.00696    0.00133    0.00498
AFIX  23
H8A   2    0.776270    0.559516    0.844768    11.00000   -1.20000
H8B   2    0.817067    0.484424    0.781356    11.00000   -1.20000
AFIX   0
C9    1    0.813073    0.613780    0.745522    11.00000    0.02132    0.02246 =
         0.02955    0.00654    0.00492    0.00607
AFIX  23
H9A   2    0.916356    0.641426    0.765130    11.00000   -1.20000
H9B   2    0.805117    0.588755    0.690558    11.00000   -1.20000
AFIX   0
B10   3    0.787970    0.778028    0.743820    11.00000    0.01638    0.01840 =
         0.02009    0.00442    0.00267    0.00362
C11   1    0.908076    0.839769    0.817556    11.00000    0.01573    0.02077 =
         0.02064    0.00432    0.00326    0.00708
C12   1    0.942646    0.811891    0.887808    11.00000    0.02150    0.02328 =
         0.02213    0.00492    0.00291    0.00711
C13   1    1.037620    0.868713    0.947978    11.00000    0.02514    0.03514 =
         0.01843    0.00441    0.00144    0.01125
C14   1    1.102330    0.958055    0.940772    11.00000    0.01872    0.03230 =
         0.02150   -0.00610    0.00030    0.00568
C15   1    0.412473    0.931787    0.749995    11.00000    0.01436    0.01874 =
         0.03286    0.00087    0.00246    0.00499
C16   1    0.444953    0.875232    0.803728    11.00000    0.01925    0.02337 =
         0.02595    0.00342    0.00878    0.00350
C17   1    0.561623    0.829591    0.798989    11.00000    0.02049    0.02064 =
         0.02182    0.00641    0.00392    0.00506
C18   1    0.650552    0.835948    0.742030    11.00000    0.01550    0.01968 =
         0.02207    0.00400    0.00203    0.00327
C19   1    0.612554    0.894471    0.690118    11.00000    0.01580    0.02176 =
         0.02111    0.00504    0.00243    0.00164
C20   1    0.496597    0.940940    0.692683    11.00000    0.01784    0.01925 =
         0.02454    0.00584   -0.00223    0.00174
C21   1    0.269776    0.209589    0.717150    11.00000    0.01860    0.01668 =
         0.02207    0.00018   -0.00060    0.00319
AFIX  23
H21A  2    0.235622    0.156597    0.744267    11.00000   -1.20000
H21B  2    0.271094    0.184868    0.662930    11.00000   -1.20000
AFIX   0
C22   1    0.173830    0.285303    0.724017    11.00000    0.01799    0.02052 =
         0.02168    0.00102    0.00032    0.00466
AFIX  23
H22A  2    0.126099    0.293048    0.673091    11.00000   -1.20000
H22B  2    0.098439    0.269084    0.756660    11.00000   -1.20000
AFIX   0
C23   1    0.245525    0.528655    0.735367    11.00000    0.01856    0.01941 =
         0.03188    0.00682    0.00431    0.00587
C24   1    0.266142    0.507024    0.652323    11.00000    0.02536    0.03000 =
         0.02852    0.01303    0.00347    0.00767
AFIX  13
H24   2    0.307476    0.448232    0.645927    11.00000   -1.20000
AFIX   0
C25   1    0.116986    0.488547    0.601704    11.00000    0.03593    0.03842 =
         0.03908    0.00842   -0.00563    0.00727
AFIX 137
H25A  2    0.053107    0.435742    0.616776    11.00000   -1.50000
H25B  2    0.128991    0.473067    0.548006    11.00000   -1.50000
H25C  2    0.073734    0.545048    0.608048    11.00000   -1.50000
AFIX   0
C26   1    0.369595    0.586020    0.625845    11.00000    0.03475    0.04692 =
         0.03833    0.02264    0.00417    0.00211
AFIX 137
H26A  2    0.324444    0.641702    0.624789    11.00000   -1.50000
H26B  2    0.389120    0.564491    0.574450    11.00000   -1.50000
H26C  2    0.461135    0.602200    0.661424    11.00000   -1.50000
AFIX   0
C27   1    0.222121    0.617544    0.764569    11.00000    0.02438    0.01941 =
         0.04997    0.00806    0.00387    0.00842
AFIX  43
H27   2    0.227123    0.665786    0.733178    11.00000   -1.20000
AFIX   0
C28   1    0.191927    0.636520    0.838039    11.00000    0.02552    0.02126 =
         0.05551   -0.00584    0.00570    0.00869
AFIX  43
H28   2    0.179537    0.698028    0.857213    11.00000   -1.20000
AFIX   0
C29   1    0.179592    0.566997    0.883842    11.00000    0.02911    0.03052 =
         0.03681   -0.00871    0.00958    0.00680
AFIX  43
H29   2    0.153961    0.580262    0.933426    11.00000   -1.20000
AFIX   0
C30   1    0.279885    0.430830    0.987556    11.00000    0.04546    0.05621 =
         0.02532    0.00559    0.00299   -0.00455
AFIX 137
H30A  2    0.381494    0.451253    0.981040    11.00000   -1.50000
H30B  2    0.272264    0.377349    1.016124    11.00000   -1.50000
H30C  2    0.246023    0.482963    1.015845    11.00000   -1.50000
AFIX   0
C31   1    0.544427    0.221767    0.758664    11.00000    0.01756    0.01448 =
         0.02830   -0.00011    0.00044    0.00479
C32   1    0.588707    0.186028    0.825581    11.00000    0.02295    0.01686 =
         0.02655   -0.00132   -0.00528    0.00250
C33   1    0.511527    0.193525    0.896039    11.00000    0.03169    0.02924 =
         0.02298    0.00275   -0.00268    0.00745
AFIX  13
H33   2    0.415376    0.211364    0.881133    11.00000   -1.20000
AFIX   0
C34   1    0.600864    0.269610    0.959598    11.00000    0.07284    0.03222 =
         0.02853   -0.00034    0.00479   -0.00181
AFIX 137
H34A  2    0.548473    0.274329    1.003672    11.00000   -1.50000
H34B  2    0.615993    0.330339    0.940659    11.00000   -1.50000
H34C  2    0.695246    0.252808    0.975103    11.00000   -1.50000
AFIX   0
C35   1    0.485388    0.101114    0.929299    11.00000    0.04376    0.03595 =
         0.03872    0.00957    0.00310    0.00317
AFIX 137
H35A  2    0.579034    0.084487    0.946726    11.00000   -1.50000
H35B  2    0.428689    0.050842    0.889817    11.00000   -1.50000
H35C  2    0.431721    0.108893    0.972633    11.00000   -1.50000
AFIX   0
C36   1    0.713560    0.146549    0.827081    11.00000    0.02863    0.02525 =
         0.03280   -0.00073   -0.00924    0.00965
AFIX  43
H36   2    0.746703    0.121134    0.871144    11.00000   -1.20000
AFIX   0
C37   1    0.790146    0.143698    0.765538    11.00000    0.02218    0.02721 =
         0.04400   -0.00511   -0.00482    0.01158
AFIX  43
H37   2    0.875524    0.117201    0.768242    11.00000   -1.20000
AFIX   0
C38   1    0.743562    0.178969    0.700412    11.00000    0.02355    0.02750 =
         0.03927   -0.00174    0.00573    0.00984
AFIX  43
H38   2    0.796686    0.175825    0.658532    11.00000   -1.20000
AFIX   0
C39   1    0.619494    0.219181    0.695252    11.00000    0.02158    0.01878 =
         0.03171    0.00148    0.00386    0.00566
C40   1    0.571624    0.257212    0.622842    11.00000    0.03089    0.02927 =
         0.03140    0.00915    0.01282    0.01301
AFIX  13
H40   2    0.486122    0.287343    0.631020    11.00000   -1.20000
AFIX   0
C41   1    0.691744    0.332049    0.603893    11.00000    0.04780    0.03828 =
         0.05764    0.01603    0.03021    0.01221
AFIX 137
H41A  2    0.726263    0.380936    0.648557    11.00000   -1.50000
H41B  2    0.652999    0.360514    0.560674    11.00000   -1.50000
H41C  2    0.772732    0.302522    0.590340    11.00000   -1.50000
AFIX   0
C42   1    0.523879    0.177327    0.555124    11.00000    0.06080    0.03950 =
         0.02961    0.00572    0.00165    0.02017
AFIX 137
H42A  2    0.604869    0.144822    0.547598    11.00000   -1.50000
H42B  2    0.494858    0.203498    0.508778    11.00000   -1.50000
H42C  2    0.441360    0.132549    0.565667    11.00000   -1.50000
AFIX   0
C43   1    0.862334    0.771542    0.663625    11.00000    0.01697    0.01776 =
         0.02074    0.00362    0.00335    0.00379
C44   1    0.774592    0.741206    0.593048    11.00000    0.01568    0.02473 =
         0.02238    0.00242    0.00272    0.00330
C45   1    0.826697    0.733376    0.523856    11.00000    0.02435    0.02950 =
         0.01976    0.00009    0.00127    0.00719
C46   1    0.974467    0.754491    0.522296    11.00000    0.02554    0.02591 =
         0.02170    0.00129    0.00878    0.00933
C47   1    1.067128    0.779693    0.590523    11.00000    0.01681    0.01924 =
         0.02800    0.00134    0.00590    0.00656
C48   1    1.009784    0.786672    0.658591    11.00000    0.01684    0.01565 =
         0.02149    0.00045    0.00124    0.00508
C49   1    0.976233    0.931351    0.813678    11.00000    0.01871    0.02092 =
         0.01957    0.00337    0.00287    0.00813
C50   1    1.070049    0.990642    0.872086    11.00000    0.01818    0.02080 =
         0.02681   -0.00114    0.00575    0.00368

C51   1    0.858244    1.007985    0.508289    11.00000    0.02126    0.02818 =
         0.04248    0.00423    0.00695    0.00539
AFIX  43
H51   2    0.761127    1.013236    0.514085    11.00000   -1.20000
AFIX   0
C52   1    0.898015    0.996309    0.436295    11.00000    0.03174    0.02235 =
         0.02966    0.00621   -0.00528    0.00417
AFIX  43
H52   2    0.828304    0.993979    0.392430    11.00000   -1.20000
AFIX   0
C53   1    1.039316    0.987970    0.427765    11.00000    0.04078    0.02830 =
         0.02417    0.00469    0.01171    0.00322
AFIX  43
H53   2    1.066148    0.979467    0.378061    11.00000   -1.20000
AFIX   0
HKLF 4

REM  mo_gar_78_0m_a.res in P-1
REM R1 =  0.0572 for   11378 Fo > 4sig(Fo)  and  0.0841 for all   15134 data
REM    648 parameters refined using      0 restraints

END

WGHT      0.0701      1.5726

REM Instructions for potential hydrogen bonds
HTAB C8 F14
EQIV $1 -x+1, -y+1, -z+1
HTAB C22 F7_$1

REM Highest difference peak  0.534,  deepest hole -0.544,  1-sigma level  0.134
Q1    1   0.9143  1.0182  0.5376  11.00000  0.05    0.53
Q2    1   0.7131  0.6643  0.4924  11.00000  0.05    0.52
Q3    1   0.5754  0.3169  0.9388  11.00000  0.05    0.52
Q4    1   0.8921  1.0231  0.4771  11.00000  0.05    0.50
Q5    1   0.8049  0.7101  0.5588  11.00000  0.05    0.50
;
_shelx_res_checksum                18626
_shelx_hkl_file
;
  -1   0   0    3.90    1.20
  -1   0   0    7.30    1.60
  -1   0   0   11.10    2.00
  -1   0   0    6.60    1.30
  -1   0   0    3.50    1.70
   1   0   0   11.30    2.20
  -2   0   0   78.09    5.60
  -2   0   0   81.79    9.50
  -2   0   0   95.29    6.30
  -2   0   0   84.39    5.80
  -2   0   0   72.79    6.70
  -2   0   0   93.49    9.60
  -2   0   0   70.09    7.80
  -2   0   0   82.29    7.80
  -2   0   0   76.59    7.50
  -2   0   0   79.59    5.00
  -2   0   0   79.99    5.10
  -2   0   0   83.19    6.30
  -2   0   0   87.59    8.40
   2   0   0   67.39    7.90
   2   0   0   72.49    7.20
   2   0   0   67.99    7.80
   2   0   0   73.29    8.20
   2   0   0   87.99    6.40
   2   0   0   89.79    6.30
   2   0   0   74.99    6.30
  -3   0   0  183.28   12.00
  -3   0   0  214.78   13.30
  -3   0   0  171.08   13.60
  -3   0   0  187.38   13.80
  -3   0   0  200.68   15.30
  -3   0   0  202.08   11.30
  -3   0   0  188.58   11.00
  -3   0   0  180.08   11.00
  -3   0   0  191.98   13.10
  -3   0   0  179.58   11.90
  -3   0   0  187.28   11.40
  -3   0   0  188.58   12.50
  -3   0   0  204.18   15.30
  -3   0   0  205.78   14.00
   3   0   0  215.28   12.30
   3   0   0  190.68   13.40
   3   0   0  181.28   13.60
   3   0   0  211.08   11.90
   3   0   0  212.68   11.60
   3   0   0  192.08   12.60
   3   0   0  188.68   13.30
  -4   0   0  333.67   19.90
  -4   0   0  391.76   23.80
  -4   0   0  327.17   23.20
  -4   0   0  374.96   25.30
  -4   0   0  314.67   20.60
  -4   0   0  348.97   20.20
  -4   0   0  363.86   22.40
  -4   0   0  340.87   23.30
  -4   0   0  360.46   25.00
  -4   0   0  374.46   22.50
  -4   0   0  337.97   21.00
  -4   0   0  349.17   25.20
  -4   0   0  338.57   19.70
  -4   0   0  342.47   19.90
   4   0   0  378.26   22.00
   4   0   0  368.56   20.60
   4   0   0  347.47   23.30
   4   0   0  408.76   21.40
   4   0   0  366.76   22.90
   4   0   0  358.36   22.70
   4   0   0  375.76   20.20
  -5   0   0  332.47   22.80
  -5   0   0  403.76   27.80
  -5   0   0  360.16   26.20
  -5   0   0  340.27   25.80
  -5   0   0  406.46   28.80
  -5   0   0  399.56   22.30
  -5   0   0  414.86   22.20
  -5   0   0  392.66   22.60
  -5   0   0  399.76   25.10
  -5   0   0  407.76   22.30
  -5   0   0  400.26   25.10
  -5   0   0  421.46   26.40
  -5   0   0  391.16   28.10
  -5   0   0  376.76   27.30
  -5   0   0  368.76   23.40
   5   0   0  408.36   24.60
   5   0   0  413.76   23.80
   5   0   0  403.06   22.40
   5   0   0  409.46   31.10
   5   0   0  399.76   22.70
   5   0   0  405.46   25.80
  -6   0   0  765.42   43.60
  -6   0   0  756.22   43.50
  -6   0   0  792.32   48.70
  -6   0   0  808.32   50.59
  -6   0   0  818.02   48.60
  -6   0   0  804.52   50.19
  -6   0   0  717.53   44.40
  -6   0   0  788.92   44.10
  -6   0   0  807.72   47.00
  -6   0   0  792.72   51.09
  -6   0   0  820.02   53.29
  -6   0   0  852.91   48.60
  -6   0   0  846.32   44.00
   6   0   0  847.52   47.90
   6   0   0  816.82   43.80
   6   0   0  798.32   46.20
   6   0   0  825.42   47.70
   6   0   0  841.92   43.60
   6   0   0  751.72   45.10
  -7   0   0   -1.60    4.20
  -7   0   0   18.20    8.60
  -7   0   0    3.10    5.80
  -7   0   0    3.30    2.80
  -7   0   0    9.90    8.80
  -7   0   0    7.70    3.30
  -7   0   0    2.10    3.40
  -7   0   0   -9.00    6.70
  -7   0   0    7.80    8.00
  -7   0   0    6.90    3.80
  -7   0   0    9.50    8.70
  -7   0   0    8.60    8.90
  -7   0   0    6.90    7.40
   7   0   0   11.40    4.80
   7   0   0   -2.90    6.60
   7   0   0   16.80    7.40
   7   0   0    4.20    2.50
   7   0   0    8.70    5.60
  -8   0   0    5.50    4.20
  -8   0   0    4.90    4.00
  -8   0   0    2.00    2.70
  -8   0   0    4.10    4.10
  -8   0   0   -1.90    3.20
  -8   0   0   -0.80    3.40
  -8   0   0   12.70    9.80
  -8   0   0   11.60    8.80
  -8   0   0    2.10    3.80
  -8   0   0    3.30    8.00
  -8   0   0    0.40    4.80
  -8   0   0   -1.50    8.60
   8   0   0    7.70    6.30
   8   0   0   -0.60    7.30
   8   0   0    9.00    5.70
   8   0   0   -4.10    6.70
  -9   0   0   45.40   12.00
  -9   0   0   46.50   16.10
  -9   0   0   33.70   10.50
  -9   0   0   28.30    6.00
  -9   0   0   35.10    5.90
  -9   0   0   30.80    6.60
  -9   0   0   29.40    6.10
  -9   0   0   29.50    3.90
  -9   0   0   22.90   10.90
   9   0   0   21.40    9.40
   9   0   0   11.20    9.00
   9   0   0   34.80    7.90
   9   0   0   22.30    8.40
 -10   0   0   81.69    9.40
 -10   0   0   81.09   11.80
 -10   0   0   68.19    9.40
 -10   0   0   69.79   16.10
 -10   0   0   71.49   15.20
 -10   0   0  106.59   17.10
 -10   0   0   92.79   10.50
  10   0   0   85.99   16.00
  10   0   0   80.19   12.10
 -11   0   0    8.70    5.30
 -11   0   0    8.50    5.40
 -11   0   0    1.40    5.30
 -11   0   0   14.30    9.10
 -11   0   0   10.30    9.30
  11   0   0    6.60    9.50
  11   0   0   12.10   11.40
 -12   0   0   49.40    7.50
 -12   0   0   43.80    7.60
 -12   0   0   43.80    9.50
 -12   0   0   51.49    8.70
  12   0   0   73.79   16.20
  12   0   0   54.99   12.40
  12   0   0   64.79   16.00
 -13   0   0   37.00    8.40
 -13   0   0   39.40   12.90
 -13   0   0   43.40    5.80
 -13   0   0   33.50    4.90
  13   0   0   41.90   11.40
  13   0   0   30.90   15.00
  13  -1   0   11.70   13.20
 -13   1   0    0.80    9.30
 -13   1   0   11.20    6.10
  12  -1   0   -4.30    9.80
  12  -1   0    0.10    7.50
  12  -1   0    4.20   11.80
 -12   1   0   10.80    9.10
 -12   1   0    7.80    5.20
 -12   1   0    5.90    6.00
 -12   1   0    7.00    3.10
 -12   1   0    7.40    2.90
  11  -1   0  113.89   17.60
  11  -1   0   92.19   17.10
 -11   1   0  106.19    7.00
 -11   1   0  152.88   18.70
 -11   1   0  107.19    9.40
 -11   1   0  127.89   18.90
 -11   1   0  115.69   15.50
 -11   1   0  135.39   11.60
  10  -1   0    0.20    6.50
  10  -1   0   -7.10    7.30
 -10   1   0   -6.10    8.30
 -10   1   0   -0.30    4.40
 -10   1   0    1.00   13.50
 -10   1   0   -5.40    3.60
 -10   1   0    6.20    9.50
 -10   1   0   -3.00    2.40
 -10   1   0    0.00    4.10
 -10   1   0   13.80    8.90
   9  -1   0    8.90    8.10
   9  -1   0    2.60    6.50
   9  -1   0   -3.90    7.60
   9  -1   0   -0.50    5.30
  -9   1   0    3.00    7.90
  -9   1   0    3.30    3.60
  -9   1   0    4.40    4.10
  -9   1   0   -3.00    9.70
  -9   1   0    6.20    7.70
  -9   1   0   -2.00    7.70
  -9   1   0    3.00    4.30
  -9   1   0    3.70    3.40
  -9   1   0   -1.00    7.80
   8  -1   0   46.90    9.20
   8  -1   0   37.50   10.50
   8  -1   0   51.89    8.80
   8  -1   0   39.90   10.20
  -8   1   0   54.39    6.20
  -8   1   0   51.69   13.20
  -8   1   0   54.79   13.00
  -8   1   0   47.20    5.90
  -8   1   0   49.10    6.30
  -8   1   0   52.09   12.90
  -8   1   0   40.50    6.20
  -8   1   0   49.20    6.20
  -8   1   0   60.39   13.10
  -8   1   0   40.70    9.80
   7  -1   0  258.07   19.70
   7  -1   0  271.07   19.00
   7  -1   0  277.87   21.60
   7  -1   0  251.07   20.80
  -7   1   0  272.17   20.60
  -7   1   0  305.97   24.80
  -7   1   0  294.07   21.00
  -7   1   0  263.17   22.70
  -7   1   0  270.67   16.40
  -7   1   0  298.47   19.40
  -7   1   0  290.47   25.10
  -7   1   0  262.97   17.10
  -7   1   0  284.77   22.60
  -7   1   0  285.77   24.30
  -7   1   0  277.57   24.20
  -7   1   0  266.17   16.60
  -7   1   0  251.27   17.00
  -7   1   0  275.97   16.30
  -7   1   0  280.47   25.00
   6  -1   0    0.90    5.40
   6  -1   0    9.90    6.00
   6  -1   0   -1.50    4.10
  -6   1   0  -11.30    5.00
  -6   1   0   10.50    7.80
  -6   1   0    6.50    2.40
  -6   1   0    6.80    2.10
  -6   1   0    4.80    7.50
  -6   1   0    2.50    6.20
  -6   1   0    7.40    6.80
  -6   1   0    6.30    5.40
  -6   1   0    6.50    4.10
  -6   1   0    0.40    2.80
  -6   1   0   -2.50    4.30
  -6   1   0   -2.60    5.80
  -6   1   0   -0.20    2.80
  -6   1   0    3.30    2.70
   5  -1   0 1815.32   97.89
   5  -1   0 2031.90   98.79
   5  -1   0 1983.60   99.79
   5  -1   0 2025.20   99.89
  -5   1   0 1629.24  100.29
  -5   1   0 1686.33   97.69
  -5   1   0 1925.01   95.59
  -5   1   0 1791.22   98.39
  -5   1   0 1747.03  101.29
  -5   1   0 1733.03  100.29
  -5   1   0 1636.44   96.19
  -5   1   0 1824.32  101.59
  -5   1   0 1830.62   95.69
  -5   1   0 1862.01   99.99
  -5   1   0 1839.32  102.09
  -5   1   0 1868.91   96.09
  -5   1   0 1891.51   96.89
  -5   1   0 1716.43   98.79
  -5   1   0 1806.12   99.09
  -5   1   0 1739.13  102.19
   4  -1   0  286.77   18.00
   4  -1   0  266.57   17.70
   4  -1   0  293.07   17.10
   4  -1   0  289.57   16.60
   4  -1   0  242.18   18.00
  -4   1   0  261.17   18.30
  -4   1   0  244.88   16.10
  -4   1   0  237.38   19.60
  -4   1   0  258.17   16.80
  -4   1   0  233.38   14.70
  -4   1   0  263.77   18.70
  -4   1   0  252.27   19.80
  -4   1   0  268.17   19.70
  -4   1   0  259.97   19.40
  -4   1   0  239.38   18.50
  -4   1   0  261.07   17.40
  -4   1   0  247.48   14.50
  -4   1   0  242.68   15.30
  -4   1   0  282.47   17.70
   3  -1   0  122.59    9.80
   3  -1   0  108.79    8.10
   3  -1   0   97.99   10.00
   3  -1   0  117.29    9.30
   3  -1   0  118.39    8.70
   3  -1   0   98.79   11.40
   3  -1   0   92.69    8.90
  -3   1   0  108.39    8.50
  -3   1   0  110.49    8.10
  -3   1   0  113.69   10.70
  -3   1   0  110.69    9.00
  -3   1   0   99.29    9.70
  -3   1   0   94.39    9.40
  -3   1   0   96.79   10.10
  -3   1   0  103.29    8.90
  -3   1   0  107.39   11.10
  -3   1   0  109.89   10.60
  -3   1   0  113.19    6.40
  -3   1   0  109.49    7.40
  -3   1   0  107.09   10.10
  -3   1   0  104.59    6.60
   1  -1   0 2036.90  111.79
   1  -1   0 2112.49  111.79
   1  -1   0 2086.39  111.89
   1  -1   0 2070.79  111.69
   1  -1   0 2182.48  111.89
   1  -1   0 2115.19  111.19
   1  -1   0 2232.38  111.19
  -1  -1   0  401.16   23.30
  -1  -1   0  404.26   23.30
  -1  -1   0  475.25   23.90
  -1  -1   0  422.66   23.80
   1   1   0  437.96   22.80
   1   1   0  466.45   24.00
   1   1   0  432.36   23.40
   1   1   0  422.16   23.70
   2   1   0 4789.72  254.87
   2   1   0 4923.21  254.87
  -3  -1   0  597.04   32.70
  -3  -1   0  553.54   32.70
  -3  -1   0  590.44   32.00
  -3  -1   0  638.94   34.20
  -3  -1   0  524.85   33.40
  -3  -1   0  607.64   33.10
  -3  -1   0  656.23   35.00
  -3  -1   0  628.34   35.90
   3   1   0  570.04   34.10
   3   1   0  622.44   32.00
   3   1   0  573.34   34.60
   3   1   0  656.13   33.90
   3   1   0  623.54   33.60
   3   1   0  580.24   32.20
   3   1   0  554.44   34.10
   3   1   0  601.94   33.20
   3   1   0  644.34   33.00
  -4  -1   0  387.86   25.50
  -4  -1   0  377.46   22.70
  -4  -1   0  412.66   27.40
  -4  -1   0  386.16   23.00
  -4  -1   0  406.46   24.60
  -4  -1   0  396.26   27.50
  -4  -1   0  364.96   21.60
  -4  -1   0  397.36   22.60
  -4  -1   0  353.96   23.50
   4   1   0  434.16   23.20
   4   1   0  410.26   24.10
   4   1   0  413.96   25.10
   4   1   0  428.56   23.20
   4   1   0  380.76   25.40
   4   1   0  427.86   24.00
   4   1   0  390.86   25.10
  -5  -1   0  269.97   18.10
  -5  -1   0  268.27   16.20
  -5  -1   0  260.67   14.50
  -5  -1   0  258.27   15.50
  -5  -1   0  237.28   20.50
  -5  -1   0  267.67   19.50
  -5  -1   0  264.07   15.80
  -5  -1   0  282.27   21.60
  -5  -1   0  237.38   18.80
   5   1   0  251.27   17.20
   5   1   0  237.48   16.00
   5   1   0  231.78   15.80
   5   1   0  234.48   16.60
   5   1   0  231.78   18.30
  -6  -1   0  295.87   22.30
  -6  -1   0  265.87   19.10
  -6  -1   0  310.07   24.80
  -6  -1   0  304.37   18.00
  -6  -1   0  294.87   22.00
  -6  -1   0  269.47   18.30
  -6  -1   0  307.77   18.30
  -6  -1   0  329.37   25.70
  -6  -1   0  290.07   16.50
  -6  -1   0  304.77   24.60
  -6  -1   0  337.77   23.20
   6   1   0  282.37   18.10
   6   1   0  274.77   18.60
   6   1   0  308.37   21.80
   6   1   0  247.78   19.40
   6   1   0  297.27   21.60
  -7  -1   0   59.49    7.80
  -7  -1   0   46.10   11.90
  -7  -1   0   40.30    7.60
  -7  -1   0   59.49   12.10
  -7  -1   0   53.09   11.40
  -7  -1   0   73.49   14.50
  -7  -1   0   54.09   13.40
  -7  -1   0   70.79   12.40
  -7  -1   0   57.49    4.90
  -7  -1   0   57.19   11.80
  -7  -1   0   52.29    6.90
  -7  -1   0   61.19    7.60
   7   1   0   55.69   10.90
   7   1   0   54.19    7.10
   7   1   0   61.79    9.60
   7   1   0   73.19   11.50
   7   1   0   71.99    8.20
   7   1   0   45.40    7.30
  -8  -1   0  500.65   29.80
  -8  -1   0  488.45   36.90
  -8  -1   0  475.25   29.00
  -8  -1   0  482.95   38.10
  -8  -1   0  488.35   26.20
  -8  -1   0  474.05   34.20
  -8  -1   0  490.55   29.50
  -8  -1   0  434.66   29.90
  -8  -1   0  474.35   34.80
   8   1   0  449.06   33.40
   8   1   0  498.55   28.20
   8   1   0  473.45   31.70
   8   1   0  514.75   34.50
   8   1   0  495.65   28.50
   8   1   0  557.44   30.90
  -9  -1   0   -4.50    4.80
  -9  -1   0    3.90    6.50
  -9  -1   0    0.30    7.60
  -9  -1   0    9.70   10.10
  -9  -1   0   26.20   13.20
  -9  -1   0    1.90    8.20
  -9  -1   0   -8.80    5.10
   9   1   0   -2.10    7.40
   9   1   0    1.30    8.50
   9   1   0  -10.50    5.40
   9   1   0    3.40    5.60
 -10  -1   0   41.80   12.20
 -10  -1   0   41.50    7.70
 -10  -1   0   60.69   13.00
 -10  -1   0   30.30    7.10
 -10  -1   0   32.10    7.90
 -10  -1   0   27.60    7.10
  10   1   0   35.00    8.50
  10   1   0   35.60   11.20
  10   1   0   15.50   10.90
 -11  -1   0   26.80   10.60
 -11  -1   0   18.40   12.20
 -11  -1   0   11.70    5.70
 -11  -1   0   16.00    7.20
 -11  -1   0    8.60    6.40
  11   1   0   10.00   10.50
  11   1   0   20.50   11.10
  11   1   0   14.80   12.80
 -12  -1   0   63.09    9.30
 -12  -1   0   46.50    9.30
 -12  -1   0   46.50   10.40
 -12  -1   0   78.99   11.00
  12   1   0   75.69   13.80
  12   1   0   81.49   17.30
  12   1   0   65.19   16.60
 -13  -1   0  -10.10    6.00
 -13  -1   0    1.30    5.90
  13   1   0    6.80   11.80
  13   1   0    6.40    8.90
  13   1   0   11.00   12.80
 -13   2   0    8.30    5.40
 -13   2   0   11.20   10.00
  12  -2   0   43.40   13.90
 -12   2   0   44.80   12.60
 -12   2   0   41.90    7.90
 -12   2   0   45.80    7.60
 -12   2   0   29.10    3.40
  11  -2   0   51.29   14.20
  11  -2   0   48.00   13.30
  11  -2   0   52.99   14.10
 -11   2   0   43.50    5.90
 -11   2   0   59.49   14.90
 -11   2   0   47.10   13.40
 -11   2   0   43.20    6.50
 -11   2   0   43.70   11.10
 -11   2   0   52.19    7.10
  10  -2   0   11.20   10.90
  10  -2   0   17.20   10.00
  10  -2   0   21.20    8.90
 -10   2   0   49.99   12.80
 -10   2   0   21.90    3.50
 -10   2   0   23.10    4.80
 -10   2   0   14.00    4.90
 -10   2   0   25.80    5.10
 -10   2   0   26.40   12.50
 -10   2   0   20.70   11.20
 -10   2   0   20.20   11.30
 -10   2   0   26.30    4.00
   9  -2   0   10.40    8.60
   9  -2   0    2.50    6.60
   9  -2   0    7.00    8.10
  -9   2   0    0.80    8.40
  -9   2   0   -4.70    3.00
  -9   2   0   -2.30    2.80
  -9   2   0   -1.50    7.80
  -9   2   0    0.20    3.80
  -9   2   0    9.90    8.30
  -9   2   0    6.70    7.90
  -9   2   0   -2.90    8.40
  -9   2   0    0.50    3.00
  -9   2   0    7.80    8.30
   8  -2   0  111.39   13.40
   8  -2   0  141.99   16.50
   8  -2   0  133.29   16.20
   8  -2   0  114.69   12.80
  -8   2   0  111.29    9.00
  -8   2   0  120.69    9.20
  -8   2   0  137.49   18.70
  -8   2   0  140.19   15.20
  -8   2   0  127.49    9.10
  -8   2   0  126.69    8.80
  -8   2   0  126.79   15.30
  -8   2   0  128.39   10.90
  -8   2   0   81.89   15.60
  -8   2   0  154.78   17.60
  -8   2   0  139.49   19.70
  -8   2   0  128.99   16.50
  -8   2   0  150.98   20.50
  -8   2   0  137.89   16.10
  -8   2   0  139.09   13.10
   7  -2   0   23.80    6.50
   7  -2   0   22.30    7.50
   7  -2   0   13.90    5.70
   7  -2   0   26.70    8.10
  -7   2   0   16.20    6.20
  -7   2   0   17.30    3.00
  -7   2   0    6.80    7.70
  -7   2   0   18.80    9.80
  -7   2   0    9.30    8.60
  -7   2   0   20.40   10.50
  -7   2   0   16.20    8.30
  -7   2   0   15.00    2.60
  -7   2   0   15.50    5.60
  -7   2   0   13.00    8.40
  -7   2   0   14.70    6.80
  -7   2   0   27.40   11.00
  -7   2   0   11.60    4.30
  -7   2   0   15.50    3.40
  -7   2   0   20.10    3.20
  -7   2   0   16.50    7.40
   6  -2   0  140.49   13.40
   6  -2   0  132.19   11.60
   6  -2   0  126.09   13.30
   6  -2   0  123.39   11.90
  -6   2   0  128.79   14.10
  -6   2   0  143.19   15.50
  -6   2   0  128.19   13.00
  -6   2   0  143.19   10.70
  -6   2   0  138.19    9.10
  -6   2   0  160.58   20.50
  -6   2   0  142.49   11.60
  -6   2   0  105.09   14.10
  -6   2   0  145.69    8.50
  -6   2   0  136.79    7.80
  -6   2   0  140.09   12.50
  -6   2   0  135.79   16.10
  -6   2   0  142.59   15.80
  -6   2   0  149.19   20.90
   5  -2   0 2700.23  132.29
   5  -2   0 2613.14  131.29
   5  -2   0 2696.63  131.09
   5  -2   0 2740.13  132.39
  -5   2   0 2369.46  133.79
  -5   2   0 2280.57  130.59
  -5   2   0 2462.75  128.09
  -5   2   0 2277.77  133.59
  -5   2   0 2472.55  131.79
  -5   2   0 2353.46  131.09
  -5   2   0 2384.56  128.19
  -5   2   0 2373.66  134.19
  -5   2   0 2500.95  129.89
  -5   2   0 2452.45  131.79
  -5   2   0 2239.18  133.09
  -5   2   0 2385.86  134.79
  -5   2   0 2444.46  132.39
  -5   2   0 2265.97  132.89
   4  -2   0  148.19   11.00
   4  -2   0  130.09   10.30
   4  -2   0  154.48   14.50
   4  -2   0  132.59   14.30
   4  -2   0  147.79   11.80
   4  -2   0  148.29   13.10
   4  -2   0  148.99   12.40
   4  -2   0  137.79   11.50
   4  -2   0  118.09   12.60
  -4   2   0  123.29   11.00
  -4   2   0  128.89    7.50
  -4   2   0  135.29   11.40
  -4   2   0  131.09    7.40
  -4   2   0  133.19   12.90
  -4   2   0  119.59   13.50
  -4   2   0  114.79   12.40
  -4   2   0  132.09   12.30
  -4   2   0  124.29   10.70
  -4   2   0  129.09   10.10
  -4   2   0  126.49   13.60
  -4   2   0  132.19    9.60
  -4   2   0  126.39   11.90
  -4   2   0  127.09   13.40
   3  -2   0  100.59    8.40
   3  -2   0   98.79   10.70
   3  -2   0  105.19    8.00
   3  -2   0   99.79   10.90
   3  -2   0   96.89    7.70
   3  -2   0   89.59    8.80
   3  -2   0   99.29   10.60
   3  -2   0   94.49    8.40
   3  -2   0   94.79   10.00
   3  -2   0   98.79    9.90
   3  -2   0   77.89    9.60
  -3   2   0   89.39    9.80
  -3   2   0   93.19    7.40
  -3   2   0   86.79    7.80
  -3   2   0   89.09    8.50
  -3   2   0   85.19    9.10
  -3   2   0   88.39    9.40
  -3   2   0   86.89    9.20
  -3   2   0   83.39    8.90
  -3   2   0   87.69    9.50
  -3   2   0   89.29    7.80
  -3   2   0   88.29    8.20
   2  -2   0  809.12   48.50
   2  -2   0  901.81   47.60
   2  -2   0  847.62   47.20
   2  -2   0  853.31   48.90
   2  -2   0  871.61   48.80
   2  -2   0  849.22   48.70
   2  -2   0  831.72   48.30
   2  -2   0  820.92   48.70
  -2   2   0  978.40   47.40
  -2   2   0  875.01   48.70
  -2   2   0  849.61   48.50
  -2   2   0  896.31   47.30
  -2   2   0  870.51   48.30
  -2   2   0  832.52   47.30
  -2   2   0  837.22   47.50
  -2   2   0  870.91   48.80
  -2   2   0  861.01   46.00
  -2   2   0  925.11   48.60
  -2   2   0  894.21   46.20
  -2   2   0  911.71   47.60
  -2   2   0  929.81   47.20
  -2   2   0  891.71   48.40
   1  -2   0  510.45   26.00
   1  -2   0  448.86   26.40
   1  -2   0  491.25   25.80
   1  -2   0  474.45   26.60
   1  -2   0  456.75   27.00
   1  -2   0  478.35   25.60
   1  -2   0  449.95   25.90
   1  -2   0  456.15   27.20
   1  -2   0  469.45   26.40
  -1   2   0  462.15   26.90
  -1   2   0  466.85   26.20
  -1   2   0  486.75   25.90
  -1   2   0  462.05   26.00
  -1   2   0  506.95   26.30
  -1   2   0  540.75   27.20
  -1   2   0  563.34   27.50
  -1   2   0  441.16   25.90
  -1   2   0  511.85   26.00
  -1   2   0  492.55   26.00
   0  -2   0 1991.70   93.39
   0  -2   0 1833.42   93.79
   0  -2   0 1663.53   93.49
   0  -2   0 1699.93   94.09
   0   2   0 1760.42   93.69
   0   2   0 1735.23   93.79
   0   2   0 1762.12   93.29
   1   2   0 3450.85  181.18
  -2  -2   0  126.89    9.10
  -2  -2   0  139.39    9.40
  -2  -2   0  133.09    9.40
  -2  -2   0  141.19   10.40
  -2  -2   0  118.89   10.20
   2   2   0  141.39    7.90
   2   2   0  147.29    9.10
   2   2   0  133.69   10.20
   2   2   0  127.19    9.20
   2   2   0  144.79   11.00
   2   2   0  122.39    9.70
  -3  -2   0  600.44   34.90
  -3  -2   0  627.84   34.60
  -3  -2   0  589.54   34.70
  -3  -2   0  674.23   36.40
  -3  -2   0  616.24   35.80
  -3  -2   0  650.43   37.40
   3   2   0  674.13   36.20
   3   2   0  643.44   34.10
   3   2   0  662.53   34.40
   3   2   0  668.03   34.50
   3   2   0  581.84   35.60
   3   2   0  621.64   33.30
   3   2   0  543.25   35.70
   3   2   0  607.94   35.70
  -4  -2   0  121.59    9.40
  -4  -2   0  132.99   14.10
  -4  -2   0  110.09    9.60
  -4  -2   0  124.29   12.20
  -4  -2   0  120.79   10.00
  -4  -2   0  104.49   10.80
   4   2   0  142.99   10.50
   4   2   0  127.49    9.00
   4   2   0  116.99   11.40
   4   2   0  126.89    7.50
   4   2   0  105.59   11.80
   4   2   0  122.09    8.70
   4   2   0  117.09    8.50
   4   2   0  128.39   11.40
   4   2   0  116.69   11.50
   4   2   0  119.79    9.80
  -5  -2   0    8.20    4.20
  -5  -2   0   11.00    7.70
  -5  -2   0   19.80    8.80
  -5  -2   0   15.50    4.40
  -5  -2   0    9.10    5.00
  -5  -2   0   20.20    7.00
  -5  -2   0   13.00    4.50
   5   2   0   16.10    3.80
   5   2   0   14.70    5.10
   5   2   0   11.90    5.60
   5   2   0   15.70    2.70
   5   2   0   19.10    4.80
   5   2   0   17.00    6.40
   5   2   0   18.00    6.40
  -6  -2   0  186.38   16.80
  -6  -2   0  161.38   14.10
  -6  -2   0  155.98   12.90
  -6  -2   0  187.38   13.00
  -6  -2   0  190.38   19.00
  -6  -2   0  169.18   18.70
  -6  -2   0  173.88   16.00
  -6  -2   0  173.38   13.10
   6   2   0  166.88   13.00
   6   2   0  185.08   14.50
   6   2   0  179.58   16.10
   6   2   0  179.18   12.80
   6   2   0  178.08   16.10
   6   2   0  193.28   14.50
  -7  -2   0  189.98   14.40
  -7  -2   0  177.88   18.70
  -7  -2   0  180.58   20.40
  -7  -2   0  152.88   13.50
  -7  -2   0  174.48   17.40
  -7  -2   0  163.58   13.20
  -7  -2   0  165.88   14.80
  -7  -2   0  155.28   17.60
   7   2   0  191.78   15.50
   7   2   0  196.18   15.00
   7   2   0  169.88   13.50
   7   2   0  190.58   14.00
   7   2   0  184.28   17.90
   7   2   0  180.78   17.40
  -8  -2   0    1.70    7.60
  -8  -2   0   13.70    7.20
  -8  -2   0   -0.30    4.00
  -8  -2   0    5.40    9.60
  -8  -2   0    4.20    5.60
  -8  -2   0    2.80    7.80
  -8  -2   0    0.00    5.70
  -8  -2   0   -4.90    6.60
  -8  -2   0    4.50    7.80
   8   2   0   -2.10    4.60
   8   2   0   -1.90    7.60
   8   2   0   -1.20    7.20
   8   2   0   -3.50    4.40
   8   2   0  -12.30    5.10
   8   2   0    3.60    4.60
  -9  -2   0   -6.20    4.80
  -9  -2   0   -2.70    5.00
  -9  -2   0   -2.50    7.50
  -9  -2   0   -4.70    7.60
  -9  -2   0   -6.20    8.50
  -9  -2   0  -10.70   10.40
  -9  -2   0    4.40    8.20
  -9  -2   0    8.80   10.30
  -9  -2   0   -4.40    6.60
  -9  -2   0   -0.70    4.90
   9   2   0    2.40    6.40
   9   2   0   12.30    8.30
   9   2   0    2.30    5.40
   9   2   0   -4.90    7.20
   9   2   0   -7.20    5.80
 -10  -2   0   24.00    8.10
 -10  -2   0   41.20    8.70
 -10  -2   0   26.60   11.00
 -10  -2   0   24.80    7.80
 -10  -2   0   22.80    7.10
 -10  -2   0   35.90   11.10
  10   2   0   27.00   10.90
  10   2   0   24.80    8.80
  10   2   0   18.20   11.00
 -11  -2   0    0.60    5.50
 -11  -2   0    6.30    7.10
 -11  -2   0   20.50   10.20
 -11  -2   0   34.70   17.80
 -11  -2   0    2.10    6.60
  11   2   0   -4.20    9.20
  11   2   0   -5.50    7.10
  11   2   0   -0.10   10.00
 -12  -2   0    7.80    7.80
 -12  -2   0   15.50    8.40
 -12  -2   0   19.40    7.70
  12   2   0   23.90    9.80
  12   2   0   31.90   14.60
  12   2   0   33.60   14.10
 -13  -2   0   12.30    6.50
  13   2   0   11.40    9.60
  13   2   0   27.40   13.80
  13   2   0    9.80   12.70
 -13   3   0   12.30    4.60
 -13   3   0  -12.90    5.80
 -13   3   0    1.50    8.70
 -12   3   0   10.40    4.10
 -12   3   0   11.10    4.20
 -12   3   0   17.00    5.30
 -12   3   0    5.90    9.00
  11  -3   0   54.79   13.90
 -11   3   0   56.49    6.80
 -11   3   0   94.09   19.20
 -11   3   0   61.79    7.30
 -11   3   0   64.89   12.20
 -11   3   0   59.19   14.80
 -11   3   0   59.59   11.80
  10  -3   0  112.79   16.40
  10  -3   0   89.49   12.90
 -10   3   0   68.19   12.40
 -10   3   0  107.89   17.80
 -10   3   0   83.19   16.20
 -10   3   0   81.69   12.40
 -10   3   0   81.99   16.00
 -10   3   0   65.79    7.10
 -10   3   0   97.79   14.80
 -10   3   0   72.59   13.40
 -10   3   0   68.59    6.70
   9  -3   0   90.79   14.30
   9  -3   0   85.99   12.30
   9  -3   0   77.29   13.70
  -9   3   0   86.79   19.20
  -9   3   0  109.99   14.20
  -9   3   0  106.69   17.10
  -9   3   0   73.49    6.70
  -9   3   0   84.89    9.80
  -9   3   0   89.29   13.30
  -9   3   0   89.19   11.80
  -9   3   0  114.59   18.10
  -9   3   0  105.39   14.70
  -9   3   0   71.29    7.00
  -9   3   0   89.99   19.10
  -9   3   0  130.89   21.00
  -9   3   0  131.69   18.80
   8  -3   0  102.99   14.20
   8  -3   0  107.29   14.70
   8  -3   0   77.59   11.20
   8  -3   0   89.99   11.40
  -8   3   0   96.79    6.60
  -8   3   0  118.39   17.50
  -8   3   0   89.19   12.60
  -8   3   0   93.39   11.70
  -8   3   0  104.29   13.80
  -8   3   0  103.19   10.20
  -8   3   0  102.09   16.20
  -8   3   0   98.19   13.30
  -8   3   0   85.09   14.10
  -8   3   0  108.99   17.50
  -8   3   0  105.49   17.40
  -8   3   0  119.29   18.70
  -8   3   0  102.89    7.00
  -8   3   0   99.69   12.70
  -8   3   0  122.49   17.70
   7  -3   0  656.23   39.10
   7  -3   0  645.44   40.30
   7  -3   0  614.54   38.50
   7  -3   0  589.44   39.80
  -7   3   0  669.23   39.60
  -7   3   0  703.13   44.30
  -7   3   0  650.83   39.90
  -7   3   0  676.33   38.90
  -7   3   0  646.64   40.20
  -7   3   0  703.93   43.40
  -7   3   0  646.74   44.30
  -7   3   0  609.14   39.20
  -7   3   0  653.63   42.60
  -7   3   0  678.63   41.40
  -7   3   0  611.94   37.40
  -7   3   0  637.04   41.90
  -7   3   0  641.34   43.30
   6  -3   0  548.65   31.50
   6  -3   0  525.15   31.60
   6  -3   0  544.05   32.80
   6  -3   0  537.55   32.70
  -6   3   0  532.75   31.50
  -6   3   0  534.55   30.40
  -6   3   0  507.55   35.90
  -6   3   0  485.45   33.70
  -6   3   0  504.65   34.40
  -6   3   0  496.15   31.80
  -6   3   0  426.16   36.40
  -6   3   0  520.65   32.80
  -6   3   0  528.55   34.90
  -6   3   0  508.15   31.80
   5  -3   0    2.80    6.70
   5  -3   0    9.30    4.20
   5  -3   0    7.50    7.30
   5  -3   0    1.30    5.20
   5  -3   0   -0.40    4.40
   5  -3   0    8.40    7.10
   5  -3   0    6.20    6.50
   5  -3   0    6.20    5.20
   5  -3   0   12.50    7.70
  -5   3   0   -3.20    5.00
  -5   3   0    1.20    3.90
  -5   3   0    2.50    5.90
  -5   3   0    5.70    4.10
  -5   3   0    3.90    5.50
  -5   3   0   10.90    5.10
  -5   3   0    4.50    3.40
  -5   3   0    1.20    4.20
  -5   3   0    1.70    5.70
  -5   3   0    4.80    6.40
  -5   3   0    2.10    5.00
  -5   3   0    0.70    6.00
  -5   3   0    0.60    6.40
   4  -3   0  446.76   25.60
   4  -3   0  426.06   28.30
   4  -3   0  428.16   27.80
   4  -3   0  446.36   24.60
   4  -3   0  432.36   27.50
   4  -3   0  381.56   27.00
   4  -3   0  419.26   27.20
   4  -3   0  411.56   27.10
   4  -3   0  426.36   24.50
  -4   3   0  391.86   21.50
  -4   3   0  355.46   26.70
  -4   3   0  365.96   26.20
  -4   3   0  387.56   24.10
  -4   3   0  365.26   26.20
  -4   3   0  387.16   26.30
  -4   3   0  386.46   21.20
  -4   3   0  394.46   26.30
  -4   3   0  397.06   24.60
  -4   3   0  377.76   24.50
  -4   3   0  427.26   24.30
  -4   3   0  413.16   25.30
  -4   3   0  415.26   25.00
  -4   3   0  389.86   26.80
   3  -3   0   13.30    5.40
   3  -3   0   18.40    5.60
   3  -3   0   13.50    5.60
   3  -3   0   18.50    6.20
   3  -3   0   22.00    6.10
   3  -3   0   17.20    4.50
   3  -3   0   14.20    5.70
   3  -3   0   12.20    3.70
  -3   3   0   15.80    2.50
  -3   3   0   10.90    4.90
  -3   3   0   15.20    5.40
  -3   3   0   14.80    4.00
  -3   3   0   14.60    5.10
  -3   3   0   13.20    4.00
  -3   3   0    8.50    3.90
  -3   3   0   14.00    4.60
  -3   3   0   20.90    5.60
  -3   3   0   19.50    2.30
  -3   3   0   17.70    3.90
  -3   3   0    7.30    3.30
  -3   3   0   17.90    5.20
  -3   3   0   13.70    3.10
   2  -3   0    1.80    3.00
   2  -3   0    3.20    4.60
   2  -3   0    6.70    4.80
   2  -3   0    6.10    3.20
   2  -3   0    4.00    4.60
   2  -3   0    8.70    2.40
   2  -3   0    0.80    4.10
   2  -3   0    1.70    4.50
   2  -3   0    2.50    5.00
   2  -3   0    7.30    2.70
  -2   3   0    7.20    4.20
  -2   3   0   10.20    2.70
  -2   3   0    2.40    4.40
  -2   3   0    5.10    2.20
  -2   3   0    5.90    3.10
  -2   3   0    7.30    3.10
  -2   3   0    3.20    4.70
  -2   3   0    1.40    1.90
  -2   3   0    4.50    1.90
  -2   3   0    7.00    3.80
  -2   3   0    5.60    3.70
  -2   3   0    4.90    2.80
   1  -3   0   85.49    8.90
   1  -3   0   89.89    6.80
   1  -3   0   76.09    6.90
   1  -3   0   78.99    8.50
   1  -3   0   87.79    7.30
   1  -3   0   95.29    6.50
   1  -3   0   83.69    6.40
  -1   3   0   89.59    6.50
  -1   3   0   87.59    7.40
  -1   3   0   78.69    6.30
  -1   3   0   73.19    5.60
  -1   3   0   94.49    7.00
  -1   3   0   74.79    6.70
  -1   3   0   82.69    7.50
   0  -3   0 1115.39   60.69
   0  -3   0 1221.98   59.39
   0  -3   0 1085.59   59.99
   0  -3   0 1247.28   60.19
   0  -3   0 1041.50   59.59
   0   3   0 1112.49   59.99
   0   3   0 1060.59   59.29
   0   3   0 1049.99   59.99
   0   3   0 1163.68   59.79
   0   3   0 1070.09   60.69
  -1  -3   0 2039.50  106.79
  -1  -3   0 1803.02  105.49
  -1  -3   0 1929.51  105.99
  -1  -3   0 2183.78  105.39
  -1  -3   0 2027.40  105.89
   1   3   0 2113.79  105.69
   1   3   0 1923.21  105.79
   1   3   0 1884.41  106.69
   1   3   0 2035.30  106.19
  -2  -3   0  331.87   19.10
  -2  -3   0  308.37   19.20
  -2  -3   0  318.87   20.00
  -2  -3   0  289.77   18.60
  -2  -3   0  280.27   18.50
   2   3   0  307.57   19.00
   2   3   0  298.37   18.90
   2   3   0  341.97   18.60
   2   3   0  330.77   18.80
   2   3   0  302.27   19.80
  -3  -3   0   63.89    7.10
  -3  -3   0   74.49    9.50
  -3  -3   0   79.29   10.40
  -3  -3   0   62.69    7.20
  -3  -3   0   69.39    7.00
  -3  -3   0   78.89    8.80
   3   3   0   56.89    6.70
   3   3   0   46.40    7.20
   3   3   0   63.69    6.90
   3   3   0   53.89    7.70
   3   3   0   67.49    5.30
   3   3   0   68.89    6.40
   3   3   0   72.99    8.60
   3   3   0   65.49    4.80
  -4  -3   0  235.38   17.50
  -4  -3   0  269.27   20.10
  -4  -3   0  246.58   16.30
  -4  -3   0  213.38   17.10
  -4  -3   0  216.88   15.50
  -4  -3   0  240.18   16.00
   4   3   0  236.18   14.90
   4   3   0  242.98   17.30
   4   3   0  252.77   14.50
   4   3   0  221.58   15.10
   4   3   0  234.38   17.10
   4   3   0  216.48   16.90
  -5  -3   0  232.98   17.40
  -5  -3   0  250.37   18.90
  -5  -3   0  247.68   20.80
  -5  -3   0  254.97   16.70
  -5  -3   0  252.27   16.60
  -5  -3   0  236.98   16.20
   5   3   0  258.47   18.50
   5   3   0  217.08   22.90
   5   3   0  250.47   15.30
   5   3   0  248.28   15.20
   5   3   0  251.67   18.60
   5   3   0  219.58   16.40
   5   3   0  220.88   16.50
   5   3   0  223.58   14.80
  -6  -3   0  320.17   23.00
  -6  -3   0  362.76   21.70
  -6  -3   0  312.07   24.40
  -6  -3   0  345.17   22.20
  -6  -3   0  336.97   21.90
  -6  -3   0  358.86   27.50
  -6  -3   0  360.06   27.90
   6   3   0  358.36   24.70
   6   3   0  336.27   20.60
   6   3   0  343.07   22.10
   6   3   0  338.57   24.30
   6   3   0  331.57   22.50
   6   3   0  315.37   23.30
   6   3   0  321.67   19.20
   6   3   0  321.17   19.10
  -7  -3   0    2.10    6.90
  -7  -3   0  -12.00    8.10
  -7  -3   0    2.10    9.40
  -7  -3   0    2.30    7.10
  -7  -3   0   -1.00    5.80
  -7  -3   0    2.80    4.90
  -7  -3   0    3.10    5.50
  -7  -3   0    1.80    7.50
   7   3   0   -1.70    5.60
   7   3   0   10.20    8.80
   7   3   0    1.30    5.40
   7   3   0   -9.80    6.40
   7   3   0    1.00    5.00
   7   3   0    2.70    3.90
  -8  -3   0   87.59   12.50
  -8  -3   0   85.09   10.60
  -8  -3   0  102.19   11.90
  -8  -3   0  108.39   15.40
  -8  -3   0  100.39   11.90
  -8  -3   0   96.39   15.80
   8   3   0  117.49   13.50
   8   3   0  110.69   10.70
   8   3   0  100.39   14.90
   8   3   0   87.69   11.10
   8   3   0  107.69   15.60
  -9  -3   0   91.09   14.70
  -9  -3   0   66.09   14.70
  -9  -3   0   89.99   11.90
  -9  -3   0   61.79   16.60
  -9  -3   0   46.40   10.70
  -9  -3   0   80.09   17.60
  -9  -3   0   79.79   11.40
  -9  -3   0   72.69   10.60
  -9  -3   0  115.29   19.80
  -9  -3   0   68.59   14.30
   9   3   0   87.39   12.20
   9   3   0   73.39    9.90
   9   3   0   73.29   14.80
   9   3   0   99.29   10.80
   9   3   0   96.19   15.90
 -10  -3   0  -10.60    6.50
 -10  -3   0   15.60    9.50
 -10  -3   0    6.20    6.20
 -10  -3   0    9.70    7.20
 -10  -3   0   17.80    9.40
 -10  -3   0    2.60    6.80
  10   3   0    4.70    7.00
  10   3   0    7.40    9.70
  10   3   0    2.30    4.90
  10   3   0   11.80    5.40
  10   3   0   11.60    9.50
 -11  -3   0   15.90    9.20
 -11  -3   0    7.80    8.20
 -11  -3   0   18.90    7.30
 -11  -3   0   31.60    9.90
 -11  -3   0   16.10    7.10
  11   3   0   36.80   13.10
  11   3   0    0.50   10.00
  11   3   0   30.10    9.70
 -12  -3   0   -6.10    6.30
 -12  -3   0  -12.90    6.70
  12   3   0   -3.30   10.60
  12   3   0   -3.70   11.90
  12   3   0  -10.50    7.20
 -13   4   0   14.80    9.30
 -13   4   0    1.30    5.20
 -12   4   0   19.20    8.70
 -12   4   0   26.50    6.00
 -12   4   0   16.70    4.30
 -12   4   0   20.50    4.90
 -11   4   0    4.00    4.70
 -11   4   0    2.00    2.80
 -11   4   0    4.70    3.20
 -11   4   0   -1.00    8.80
 -11   4   0    0.50    6.80
 -10   4   0   45.00    4.80
 -10   4   0   53.09    9.90
 -10   4   0   34.90   12.50
 -10   4   0   34.30    9.60
 -10   4   0   34.60   10.90
 -10   4   0   25.80   13.70
 -10   4   0   45.20   12.60
 -10   4   0   47.20   13.10
 -10   4   0   50.29   13.40
 -10   4   0   43.20    7.70
 -10   4   0   43.80   10.90
 -10   4   0   53.39   13.80
 -10   4   0   44.90    5.00
  -9   4   0  198.68   21.90
  -9   4   0  147.59   16.90
  -9   4   0  163.58   10.10
  -9   4   0  137.69   15.40
  -9   4   0  172.58   18.90
  -9   4   0  203.28   22.10
  -9   4   0  179.88   20.30
  -9   4   0  173.18   16.50
  -9   4   0  172.48   19.90
  -9   4   0  216.98   32.90
  -9   4   0  166.58    9.90
  -9   4   0  148.79   16.60
  -9   4   0  188.68   20.30
  -9   4   0  152.08   14.10
  -9   4   0  148.19   17.00
  -8   4   0   70.49   10.30
  -8   4   0   80.89   15.00
  -8   4   0   65.29   14.70
  -8   4   0   71.79   12.10
  -8   4   0   85.89   14.00
  -8   4   0   63.49   13.50
  -8   4   0   61.19   10.70
  -8   4   0   80.29   11.30
  -8   4   0   71.69   14.00
  -8   4   0   79.79   14.90
  -8   4   0   76.89   14.70
  -8   4   0   67.09   11.90
   7  -4   0   43.70    7.90
   7  -4   0   39.90    7.80
  -7   4   0   47.80    9.90
  -7   4   0   40.20    6.90
  -7   4   0   50.59   11.90
  -7   4   0   65.19    9.70
  -7   4   0   43.00   11.00
  -7   4   0   33.30    7.30
  -7   4   0   40.20   11.10
  -7   4   0   49.99   10.60
  -7   4   0   30.20    8.40
  -7   4   0   48.10   11.50
  -7   4   0   45.30    7.80
  -7   4   0   44.90   11.50
  -7   4   0   47.40   11.90
   6  -4   0  125.99   14.80
   6  -4   0  112.69   10.90
   6  -4   0  133.69   17.10
  -6   4   0  135.79   15.90
  -6   4   0  123.99   11.40
  -6   4   0   93.79   10.00
  -6   4   0   97.09   12.60
  -6   4   0  103.09   10.50
  -6   4   0  125.59   17.50
  -6   4   0  102.79   13.30
  -6   4   0  101.89   12.10
   5  -4   0  233.98   19.30
   5  -4   0  243.98   20.10
   5  -4   0  244.58   20.00
   5  -4   0  222.38   19.20
   5  -4   0  259.87   18.00
   5  -4   0  236.18   21.90
   5  -4   0  236.98   20.50
  -5   4   0  256.97   16.20
  -5   4   0  204.88   18.60
  -5   4   0  208.68   12.40
  -5   4   0  202.88   18.10
  -5   4   0  219.98   17.10
  -5   4   0  224.88   15.60
  -5   4   0  212.98   18.70
  -5   4   0  214.88   18.60
  -5   4   0  216.08   12.10
  -5   4   0  223.68   18.20
  -5   4   0  223.48   16.40
  -5   4   0  210.88   18.10
  -5   4   0  220.08   16.30
  -5   4   0  228.18   16.90
   4  -4   0    0.30    6.90
   4  -4   0    3.50    6.60
   4  -4   0    9.20    6.90
   4  -4   0    8.00    7.00
   4  -4   0   12.40    6.90
   4  -4   0   13.30    7.20
   4  -4   0    4.10    4.30
  -4   4   0    2.50    5.70
  -4   4   0    4.40    5.30
  -4   4   0   10.90    6.10
  -4   4   0    3.30    4.60
  -4   4   0    7.60    2.10
  -4   4   0    5.00    3.00
  -4   4   0   -3.40    4.70
  -4   4   0   12.60    6.80
  -4   4   0   10.60    4.90
  -4   4   0    2.50    6.10
  -4   4   0    8.10    6.20
  -4   4   0    4.50    3.40
  -4   4   0   -0.30    3.80
  -4   4   0    8.60    4.50
   3  -4   0   22.80    4.00
   3  -4   0   32.70    3.40
   3  -4   0   29.30    3.60
   3  -4   0   22.90    6.70
   3  -4   0   22.40    4.50
   3  -4   0   23.80    6.80
   3  -4   0   29.10    6.60
   3  -4   0   31.90    6.80
   3  -4   0   19.60    6.80
   3  -4   0   33.10    7.60
   3  -4   0   28.50    5.10
  -3   4   0   29.40    6.70
  -3   4   0   27.30    5.80
  -3   4   0   21.10    3.70
  -3   4   0   23.80    4.60
  -3   4   0   34.40    6.80
  -3   4   0   29.70    5.00
  -3   4   0   23.40    4.40
  -3   4   0   24.30    4.80
  -3   4   0   23.90    3.90
  -3   4   0   23.20    5.90
  -3   4   0   22.20    5.40
  -3   4   0   24.00    2.60
  -3   4   0   23.30    2.90
  -3   4   0   21.70    3.20
  -3   4   0   20.50    5.60
   2  -4   0  949.40   59.29
   2  -4   0 1143.39   57.49
   2  -4   0  991.80   59.69
   2  -4   0 1083.69   59.49
   2  -4   0 1061.39   56.69
   2  -4   0 1077.79   58.79
   2  -4   0 1080.19   59.29
   2  -4   0 1117.19   57.99
   2  -4   0 1136.89   57.59
   2  -4   0 1095.59   58.49
   2  -4   0 1025.40   57.69
  -2   4   0 1023.00   56.99
  -2   4   0  997.10   58.09
  -2   4   0  893.61   57.19
  -2   4   0  926.51   57.29
  -2   4   0 1094.69   57.39
  -2   4   0 1091.89   57.39
  -2   4   0 1260.87   59.89
  -2   4   0 1175.38   58.09
  -2   4   0 1242.08   60.09
  -2   4   0 1079.29   58.09
   1  -4   0 5920.31  304.47
   1  -4   0 5933.01  304.77
  -1   4   0 5562.94  302.07
  -1   4   0 5648.83  303.47
  -1   4   0 6069.29  302.87
  -1   4   0 5605.34  304.17
   0  -4   0 5140.69  264.17
   0   4   0 4953.40  263.27
   0   4   0 4940.11  262.47
  -1  -4   0   71.69    7.50
  -1  -4   0   65.09    7.00
  -1  -4   0   70.19    6.00
  -1  -4   0   71.29    6.80
  -1  -4   0   69.89    8.80
   1   4   0   72.29    7.50
   1   4   0   66.89    6.70
   1   4   0   66.49    8.60
   1   4   0   59.99    7.10
  -2  -4   0   18.70    5.80
  -2  -4   0   13.50    4.30
  -2  -4   0    7.00    4.30
  -2  -4   0    6.50    4.20
  -2  -4   0    5.70    3.80
   2   4   0    7.80    4.10
   2   4   0   12.60    4.50
   2   4   0   12.70    4.00
   2   4   0   12.10    5.50
  -3  -4   0 1048.20   55.39
  -3  -4   0 1041.60   56.69
  -3  -4   0  963.70   54.99
  -3  -4   0  967.90   54.79
  -3  -4   0  903.91   54.29
  -3  -4   0 1006.40   56.29
   3   4   0  993.90   56.49
   3   4   0 1007.10   54.29
   3   4   0 1038.10   52.79
   3   4   0  981.10   55.19
   3   4   0  858.01   54.59
   3   4   0 1045.00   54.69
  -4  -4   0   -1.50    3.90
  -4  -4   0    1.70    5.50
  -4  -4   0    1.10    5.10
  -4  -4   0    8.00    6.80
  -4  -4   0    4.80    4.50
   4   4   0    6.00    5.50
   4   4   0    0.00    3.70
   4   4   0   -2.30    3.40
   4   4   0   -3.50    3.10
   4   4   0    0.70    1.80
   4   4   0    5.40    2.40
  -5  -4   0   27.50    6.50
  -5  -4   0   27.00    8.10
  -5  -4   0   21.30    5.80
  -5  -4   0   21.20    6.00
  -5  -4   0   30.00    7.80
  -5  -4   0   18.90    9.30
   5   4   0   25.30    7.70
   5   4   0   18.30    5.00
   5   4   0   13.90    4.30
   5   4   0   19.90    7.20
   5   4   0    9.60    6.40
   5   4   0   21.50    4.00
  -6  -4   0  193.58   18.10
  -6  -4   0  211.18   22.00
  -6  -4   0  251.27   17.50
  -6  -4   0  216.08   21.80
  -6  -4   0  216.48   16.30
  -6  -4   0  211.78   17.80
  -6  -4   0  231.88   19.90
   6   4   0  239.18   19.40
   6   4   0  209.18   18.80
   6   4   0  203.68   14.20
   6   4   0  216.68   14.70
   6   4   0  221.68   16.90
   6   4   0  209.48   16.90
   6   4   0  229.08   18.50
   6   4   0  235.58   14.80
  -7  -4   0   19.60    7.30
  -7  -4   0   35.40    9.60
  -7  -4   0   37.80   12.60
  -7  -4   0   22.70    6.60
  -7  -4   0   30.70    7.90
  -7  -4   0   30.60   11.10
  -7  -4   0    0.30    9.50
  -7  -4   0   27.00    8.80
   7   4   0   26.00    9.60
   7   4   0   23.60    3.80
   7   4   0   27.10    7.50
   7   4   0   27.00    5.60
   7   4   0   44.70   11.10
   7   4   0   23.90    7.50
   7   4   0   37.40    9.00
  -8  -4   0   -0.70    2.90
  -8  -4   0   11.90    8.30
  -8  -4   0   17.70    6.70
  -8  -4   0   10.50    7.90
  -8  -4   0    8.30    6.60
  -8  -4   0    5.70    5.20
  -8  -4   0   15.30    7.40
   8   4   0   13.80    7.20
   8   4   0   11.90    9.30
   8   4   0   11.70    4.80
   8   4   0   18.10    6.90
   8   4   0    9.00    8.90
   8   4   0    5.10    3.40
  -9  -4   0   43.90   10.30
  -9  -4   0   71.19   17.10
  -9  -4   0   38.30    8.70
  -9  -4   0   54.79   13.50
  -9  -4   0   74.99   13.80
  -9  -4   0   47.80   12.50
  -9  -4   0   55.69   10.30
   9   4   0   67.09   16.80
   9   4   0   48.20    7.70
   9   4   0   52.09    9.70
   9   4   0   36.70    9.20
   9   4   0   51.49    9.60
 -10  -4   0   19.80    7.90
 -10  -4   0   15.80    8.90
 -10  -4   0   11.70    8.40
 -10  -4   0   38.30   10.20
 -10  -4   0   15.60    7.60
 -10  -4   0   58.29   14.70
  10   4   0   23.20   11.40
  10   4   0   10.40   10.80
  10   4   0   14.20    8.40
 -11  -4   0  121.79   19.60
 -11  -4   0  118.69   16.60
 -11  -4   0  109.89   14.60
 -11  -4   0  132.09   15.50
 -11  -4   0  123.59   17.00
 -11  -4   0  162.38   25.60
  11   4   0  144.29   12.80
  11   4   0  135.79   17.00
  11   4   0  131.19   20.70
  11   4   0  136.19   20.60
 -12  -4   0   -0.10    8.30
 -12  -4   0    5.80    7.70
 -12  -4   0   -6.50   10.40
  12   4   0   21.90   14.00
  12   4   0   -8.00    7.40
 -13   5   0    0.70    5.20
 -13   5   0   13.10    9.00
 -13   5   0    9.50    3.40
 -13   5   0    1.00    4.50
 -12   5   0   60.19    9.30
 -12   5   0   70.19    6.90
 -12   5   0   76.69   13.50
 -11   5   0   56.19   11.00
 -11   5   0   48.00    8.70
 -11   5   0   50.89    5.20
 -11   5   0   50.29    5.10
 -10   5   0   74.29   12.00
 -10   5   0   92.79   16.50
 -10   5   0   93.89    6.60
 -10   5   0   89.39   14.50
 -10   5   0  118.19   16.60
 -10   5   0  111.49   14.10
 -10   5   0  118.49   19.60
 -10   5   0  110.79   15.50
 -10   5   0  108.79   18.10
 -10   5   0  100.89   19.70
 -10   5   0   88.89    6.20
 -10   5   0  123.19   17.60
 -10   5   0   80.89   20.10
 -10   5   0   88.79   11.10
 -10   5   0  122.39   20.50
  -9   5   0   96.59   16.20
  -9   5   0  114.09   18.80
  -9   5   0  115.89   18.70
  -9   5   0  108.99   15.20
  -9   5   0   79.69   12.30
  -9   5   0   84.69   11.00
  -9   5   0   83.49   16.10
  -9   5   0  117.79   19.20
  -9   5   0   80.29   12.10
  -9   5   0  148.19   23.80
  -9   5   0  111.29   17.60
  -9   5   0   99.99   13.20
  -9   5   0  117.89   15.50
  -8   5   0  408.86   28.60
  -8   5   0  391.96   33.20
  -8   5   0  416.96   33.70
  -8   5   0  397.26   32.80
  -8   5   0  439.56   30.00
  -8   5   0  444.36   29.00
  -8   5   0  466.15   31.60
  -8   5   0  428.76   29.50
  -8   5   0  396.26   31.70
  -8   5   0  452.55   32.80
  -8   5   0  424.26   27.60
  -8   5   0  452.15   30.40
  -8   5   0  416.96   32.00
   7  -5   0  165.68   19.60
  -7   5   0  202.68   20.40
  -7   5   0  227.38   17.90
  -7   5   0  216.78   20.80
  -7   5   0  211.18   19.80
  -7   5   0  199.98   15.70
  -7   5   0  184.98   18.90
  -7   5   0  212.38   20.80
  -7   5   0  180.08   19.20
  -7   5   0  211.28   17.20
  -7   5   0  197.68   18.20
  -7   5   0  230.08   16.80
  -7   5   0  192.98   17.80
  -7   5   0  182.88   16.00
   6  -5   0  220.28   22.00
   6  -5   0  233.78   22.10
   6  -5   0  268.77   22.90
   6  -5   0  267.87   22.90
   6  -5   0  238.08   22.60
  -6   5   0  231.48   20.90
  -6   5   0  261.07   19.90
  -6   5   0  265.67   19.60
  -6   5   0  265.87   18.40
  -6   5   0  267.47   22.20
  -6   5   0  274.87   19.20
  -6   5   0  292.07   18.80
   5  -5   0   -0.40    6.30
   5  -5   0   -0.50    5.70
   5  -5   0   -5.40    5.80
   5  -5   0   -2.30    7.10
   5  -5   0   -1.00    6.80
   5  -5   0    0.60    6.90
  -5   5   0   -1.40    2.60
  -5   5   0   -3.70    5.30
  -5   5   0    0.80    3.50
  -5   5   0    2.80    1.20
  -5   5   0    1.80    4.40
  -5   5   0   -6.00    3.90
  -5   5   0   -5.20    5.60
  -5   5   0   -0.50    4.50
  -5   5   0   -0.90    5.90
  -5   5   0    2.70    1.90
  -5   5   0    2.70    5.40
  -5   5   0    0.50    3.80
  -5   5   0   -0.80    4.60
  -5   5   0    1.40    5.70
  -5   5   0   -4.30    5.20
   4  -5   0  117.39   14.20
   4  -5   0  100.89   13.20
   4  -5   0  112.79   12.80
   4  -5   0   66.99    5.40
   4  -5   0  101.19   12.00
   4  -5   0   67.19    5.40
   4  -5   0  101.59   14.10
   4  -5   0  114.89   13.10
  -4   5   0   75.69    9.20
  -4   5   0   78.59    8.60
  -4   5   0   68.59   10.10
  -4   5   0   74.49   10.10
  -4   5   0   84.19    7.90
  -4   5   0   76.39    7.40
  -4   5   0   79.79   10.90
  -4   5   0   99.59   10.70
  -4   5   0   75.09    5.50
  -4   5   0   98.69   11.90
  -4   5   0   69.89    6.30
  -4   5   0   87.29    9.70
  -4   5   0   78.69    8.70
  -4   5   0   90.89   11.60
  -4   5   0   81.49    8.90
  -4   5   0   79.99    6.10
   3  -5   0 1400.36   77.59
   3  -5   0 1478.95   77.19
   3  -5   0 1523.85   80.69
   3  -5   0 1563.74   79.99
   3  -5   0 1332.67   80.29
   3  -5   0 1469.55   79.19
   3  -5   0 1361.26   80.69
   3  -5   0 1494.85   76.99
   3  -5   0 1509.75   80.29
  -3   5   0 1378.86   76.49
  -3   5   0 1382.96   78.69
  -3   5   0 1450.45   77.29
  -3   5   0 1264.07   76.89
  -3   5   0 1296.47   77.49
  -3   5   0 1348.27   77.69
  -3   5   0 1664.93   80.99
  -3   5   0 1445.86   76.99
  -3   5   0 1645.34   80.49
  -3   5   0 1484.25   78.09
   2  -5   0 3604.14  183.68
   2  -5   0 3844.92  183.38
   2  -5   0 3153.28  185.38
   2  -5   0 3692.53  184.68
   2  -5   0 3555.14  184.08
   2  -5   0 3241.78  185.78
   2  -5   0 3765.72  183.58
   2  -5   0 3749.22  183.08
  -2   5   0 3312.87  184.38
  -2   5   0 3612.74  183.18
  -2   5   0 3273.07  183.58
  -2   5   0 3489.05  183.78
  -2   5   0 3186.78  182.78
  -2   5   0 3425.36  183.58
  -2   5   0 3342.87  183.18
   1  -5   0 5382.06  268.77
   1  -5   0 5104.79  270.07
   1  -5   0 5654.03  268.07
   1  -5   0 4993.00  268.77
   1  -5   0 5073.29  269.47
  -1   5   0 5128.69  267.87
  -1   5   0 4994.80  268.87
  -1   5   0 4821.52  268.17
  -1   5   0 4849.51  268.67
   0  -5   0 2484.05  141.09
   0  -5   0 2715.43  141.19
   0  -5   0 2600.94  140.79
   0  -5   0 2958.30  140.39
   0  -5   0 2809.62  142.39
   0   5   0 2449.35  142.19
   0   5   0 2768.72  141.59
   0   5   0 2653.03  140.89
   0   5   0 2473.55  141.09
  -1  -5   0  200.18   14.50
  -1  -5   0  201.98   14.90
  -1  -5   0  221.78   13.90
  -1  -5   0  219.38   15.20
  -1  -5   0  226.88   16.50
  -1  -5   0  225.18   13.30
   1   5   0  260.27   15.50
   1   5   0  202.38   14.80
   1   5   0  214.58   14.40
   1   5   0  201.78   16.30
  -2  -5   0    9.10    4.10
  -2  -5   0    7.60    4.80
  -2  -5   0    5.80    6.00
  -2  -5   0    4.60    4.90
  -2  -5   0    0.60    4.20
   2   5   0    3.90    4.70
   2   5   0    1.50    4.00
   2   5   0   11.70    5.10
   2   5   0    2.20    6.00
  -3  -5   0   32.40    7.70
  -3  -5   0   36.60    8.50
  -3  -5   0   16.60    5.50
  -3  -5   0   27.90    6.30
  -3  -5   0   34.80    7.00
  -3  -5   0   24.70    6.40
   3   5   0   23.90    5.50
   3   5   0   35.50    6.70
   3   5   0   22.90    7.70
   3   5   0   34.30    6.60
   3   5   0   32.30    3.90
  -4  -5   0  315.77   20.60
  -4  -5   0  276.87   22.00
  -4  -5   0  268.17   18.80
  -4  -5   0  297.67   20.00
  -4  -5   0  287.17   21.00
  -4  -5   0  289.27   19.70
   4   5   0  254.87   19.40
   4   5   0  283.47   16.50
   4   5   0  296.17   21.60
   4   5   0  275.47   16.30
   4   5   0  252.57   18.50
   4   5   0  291.47   18.50
   4   5   0  283.77   19.60
  -5  -5   0   49.20    8.60
  -5  -5   0   47.80    9.60
  -5  -5   0   52.29   11.30
  -5  -5   0   40.60    8.90
  -5  -5   0   33.20    7.10
   5   5   0   44.10    5.20
   5   5   0   44.50    9.90
   5   5   0   29.40    7.90
   5   5   0   43.60    4.20
   5   5   0   45.60    8.10
   5   5   0   47.50    6.90
   5   5   0   44.10    7.00
  -6  -5   0   99.39   16.30
  -6  -5   0   90.29   13.50
  -6  -5   0   99.09   14.00
  -6  -5   0  108.39   13.80
  -6  -5   0   86.49   11.60
  -6  -5   0  102.49   11.70
   6   5   0   95.09    8.30
   6   5   0  119.89   14.30
   6   5   0   95.69   10.20
   6   5   0   80.99    9.00
   6   5   0   67.29   11.80
  -7  -5   0   68.99   15.50
  -7  -5   0   90.79   14.70
  -7  -5   0   93.09   12.40
  -7  -5   0   97.19   12.70
  -7  -5   0  116.09   18.70
  -7  -5   0   82.69   13.20
  -7  -5   0  107.69   12.60
   7   5   0   76.59   13.80
   7   5   0   79.39    8.70
   7   5   0   84.89    8.90
   7   5   0  102.59   12.50
   7   5   0   83.29   13.90
   7   5   0   78.79    8.10
  -8  -5   0  139.19   16.70
  -8  -5   0  137.99   14.40
  -8  -5   0  149.49   15.60
  -8  -5   0  155.78   17.20
  -8  -5   0  136.09   15.60
   8   5   0  148.49   15.20
   8   5   0  142.79   19.20
   8   5   0  148.59   18.90
   8   5   0  177.18   16.30
   8   5   0  143.29   12.20
  -9  -5   0   -9.10    6.10
  -9  -5   0   14.80    7.80
  -9  -5   0   15.80    8.60
  -9  -5   0   -4.50    5.50
  -9  -5   0   -7.20    6.50
  -9  -5   0   -1.40    7.60
   9   5   0   -2.70    4.20
   9   5   0   -4.50    9.20
   9   5   0  -12.30    5.10
   9   5   0    6.80    9.10
   9   5   0    3.50    7.20
 -10  -5   0   33.10    9.00
 -10  -5   0   30.70   10.70
 -10  -5   0   38.30   10.20
 -10  -5   0   52.39   12.90
 -10  -5   0   13.20    8.40
 -10  -5   0   14.10    8.40
  10   5   0   22.30   12.00
  10   5   0   30.70   12.80
  10   5   0   22.80    8.80
  10   5   0   20.10    8.00
 -11  -5   0   33.40   12.90
 -11  -5   0   17.50   12.30
 -11  -5   0    9.10    7.80
 -11  -5   0   -4.10    8.30
 -11  -5   0    3.60    8.20
  11   5   0    2.90   10.80
  11   5   0    2.50   10.10
  11   5   0   21.80    9.50
  11   5   0    9.80    6.90
 -12  -5   0    7.20    8.10
 -12  -5   0    3.60    9.70
 -12  -5   0   -7.80    7.80
  12   5   0   13.80   12.30
  12   5   0    3.00    8.60
  12   5   0   10.00   12.70
 -13   6   0   55.49   12.30
 -13   6   0   56.09    9.50
 -12   6   0   26.50    7.40
 -12   6   0   19.20    2.90
 -12   6   0   17.50    3.10
 -11   6   0   -0.40    1.90
 -11   6   0   -1.00    6.50
 -11   6   0    0.60    6.40
 -10   6   0   -1.20    8.80
 -10   6   0    6.70    9.20
 -10   6   0    6.40    7.70
 -10   6   0    0.50    8.20
 -10   6   0    2.00    8.30
 -10   6   0    5.30    8.30
 -10   6   0    4.60    9.50
 -10   6   0    2.20    5.60
 -10   6   0   -6.40    5.50
 -10   6   0   -7.20    7.60
 -10   6   0  -10.60   11.20
 -10   6   0   -7.70    6.50
 -10   6   0    8.10    8.80
  -9   6   0   13.70    8.40
  -9   6   0    8.90    8.10
  -9   6   0    1.80    6.70
  -9   6   0    0.90    4.90
  -9   6   0   14.40    8.60
  -9   6   0    2.40    5.40
  -9   6   0    1.80    8.70
  -9   6   0    4.80   10.70
  -9   6   0   -7.30    6.70
  -9   6   0    8.40    8.90
  -9   6   0   22.80   10.60
  -9   6   0    0.00    7.80
  -9   6   0   -5.00    7.80
  -8   6   0  151.38   17.70
  -8   6   0  165.18   17.20
  -8   6   0  166.38   14.80
  -8   6   0  168.08   19.30
  -8   6   0  154.88   20.00
  -8   6   0  151.98   16.20
  -8   6   0  166.28   16.40
  -8   6   0  163.98   18.30
  -8   6   0  160.48   21.20
  -8   6   0  148.19   20.00
  -8   6   0  155.98   14.90
  -8   6   0  130.19   14.40
  -8   6   0  150.28   18.30
   7  -6   0    4.90    8.70
   7  -6   0    0.30    8.20
   7  -6   0   -1.10    8.50
   7  -6   0    6.20    8.70
   7  -6   0    5.80    9.30
  -7   6   0    4.20    7.30
  -7   6   0    5.70    6.80
  -7   6   0    9.60    6.70
  -7   6   0    5.70    6.00
  -7   6   0    0.50    5.00
  -7   6   0    5.20    5.60
  -7   6   0   13.10    8.10
  -7   6   0   11.30    9.00
  -7   6   0    0.00    7.30
  -7   6   0    5.50    7.60
  -7   6   0   -3.20    8.60
  -7   6   0    1.50    5.20
  -7   6   0    0.20    7.50
   6  -6   0   79.29   14.70
   6  -6   0   62.29   12.40
   6  -6   0   71.09   13.10
   6  -6   0   67.99   13.20
   6  -6   0   53.39   12.60
   6  -6   0   95.39   15.40
  -6   6   0   66.29    5.50
  -6   6   0   71.99    6.50
  -6   6   0   66.79    9.60
  -6   6   0   90.49   20.90
  -6   6   0   59.59    5.10
  -6   6   0   64.79   10.30
  -6   6   0   66.69   11.70
  -6   6   0   62.59   10.30
  -6   6   0   78.09   13.50
  -6   6   0   65.49    9.80
  -6   6   0   68.19   12.50
  -6   6   0   71.69    4.90
  -6   6   0   85.49   13.50
  -6   6   0   87.39    9.30
  -6   6   0   78.09   10.00
   5  -6   0  617.64   41.20
   5  -6   0  563.44   40.10
   5  -6   0  603.54   39.60
   5  -6   0  595.64   40.50
   5  -6   0  664.53   44.70
   5  -6   0  643.54   42.10
  -5   6   0  609.44   37.90
  -5   6   0  543.55   34.70
  -5   6   0  607.44   37.70
  -5   6   0  695.63   34.90
  -5   6   0  615.44   39.40
  -5   6   0  607.44   39.30
  -5   6   0  680.43   40.80
  -5   6   0  679.13   39.80
  -5   6   0  673.23   36.70
  -5   6   0  616.54   37.50
  -5   6   0  676.63   36.00
  -5   6   0  722.83   34.50
  -5   6   0  590.04   39.10
   4  -6   0  313.07   18.40
   4  -6   0  318.77   23.00
   4  -6   0  304.97   23.50
   4  -6   0  289.37   22.00
   4  -6   0  356.26   27.50
   4  -6   0  315.37   23.50
   4  -6   0  315.47   19.80
   4  -6   0  313.27   18.40
  -4   6   0  331.37   19.50
  -4   6   0  296.17   20.30
  -4   6   0  331.87   18.80
  -4   6   0  335.17   20.70
  -4   6   0  322.37   20.40
  -4   6   0  376.76   23.40
  -4   6   0  303.57   20.20
  -4   6   0  322.77   18.20
  -4   6   0  263.57   18.50
  -4   6   0  320.77   23.20
  -4   6   0  324.47   19.90
  -4   6   0  271.17   21.20
   3  -6   0   85.79    8.20
   3  -6   0   92.09    7.80
   3  -6   0   57.29   10.50
   3  -6   0   84.29   12.40
   3  -6   0   86.59   11.40
   3  -6   0   88.99    5.70
   3  -6   0   75.29    5.80
   3  -6   0   84.09    9.90
   3  -6   0   80.49    7.90
   3  -6   0   85.49   10.10
   3  -6   0   82.69   10.90
  -3   6   0   84.49    8.20
  -3   6   0   84.49    8.00
  -3   6   0   72.19    7.60
  -3   6   0   85.59    7.00
  -3   6   0   74.19    9.10
  -3   6   0   78.89    7.90
  -3   6   0  115.99   11.60
  -3   6   0   75.19    7.40
   2  -6   0  703.63   44.70
   2  -6   0  798.12   43.00
   2  -6   0  742.73   45.50
   2  -6   0  848.82   42.40
   2  -6   0  805.12   43.10
   2  -6   0  723.03   42.30
   2  -6   0  864.01   42.90
  -2   6   0  803.92   42.30
  -2   6   0  727.73   43.90
  -2   6   0  772.62   43.10
  -2   6   0  722.63   43.00
  -2   6   0  724.83   41.40
  -2   6   0  762.82   42.50
  -2   6   0  783.12   42.80
   1  -6   0  313.27   20.60
   1  -6   0  318.07   22.20
   1  -6   0  309.67   21.60
   1  -6   0  347.77   20.30
   1  -6   0  369.06   19.90
   1  -6   0  354.26   21.10
  -1   6   0  323.07   19.50
  -1   6   0  380.56   19.80
  -1   6   0  365.96   21.20
  -1   6   0  310.37   21.90
  -1   6   0  310.57   20.90
  -1   6   0  287.17   19.90
   0  -6   0  408.66   26.10
   0  -6   0  462.85   27.70
   0  -6   0  470.15   26.60
   0  -6   0  450.05   25.80
   0  -6   0  456.35   25.00
   0   6   0  405.56   27.60
   0   6   0  431.36   25.70
   0   6   0  445.16   26.60
   0   6   0  359.06   25.80
  -1  -6   0 1353.16   77.49
  -1  -6   0 1458.45   75.99
  -1  -6   0 1415.16   77.99
  -1  -6   0 1250.97   77.79
  -1  -6   0 1501.45   76.99
  -1  -6   0 1538.25   79.79
   1   6   0 1555.14   78.89
   1   6   0 1511.35   77.79
   1   6   0 1271.67   79.29
   1   6   0 1406.06   77.99
  -2  -6   0   99.49   12.10
  -2  -6   0   82.79    9.80
  -2  -6   0   95.09    8.90
  -2  -6   0   91.79   10.30
  -2  -6   0   95.19   10.30
   2   6   0   87.29   12.30
   2   6   0  110.79   11.00
   2   6   0  112.99   10.90
   2   6   0  103.49    9.80
  -3  -6   0   16.90    7.10
  -3  -6   0   16.40    5.40
  -3  -6   0   20.90    6.40
  -3  -6   0   23.10    6.20
   3   6   0   10.90    4.90
   3   6   0   19.00    6.00
   3   6   0   10.60    7.00
   3   6   0   14.40    5.60
  -4  -6   0   57.19   10.60
  -4  -6   0   47.10    8.00
  -4  -6   0   76.89   11.80
  -4  -6   0   73.89   10.10
  -4  -6   0   65.99    9.50
   4   6   0   63.79    5.40
   4   6   0   56.29   11.10
   4   6   0   59.09    5.90
   4   6   0   68.69   10.20
   4   6   0   61.49    9.60
   4   6   0   77.29    9.10
   4   6   0   43.80    8.20
  -5  -6   0  557.84   35.90
  -5  -6   0  566.04   33.30
  -5  -6   0  520.25   34.00
  -5  -6   0  482.35   32.50
  -5  -6   0  550.84   35.00
  -5  -6   0  515.55   32.10
   5   6   0  500.95   31.50
   5   6   0  496.05   28.50
   5   6   0  520.95   31.20
   5   6   0  421.96   32.10
   5   6   0  531.65   29.00
   5   6   0  506.05   33.10
   5   6   0  532.15   35.10
  -6  -6   0  431.46   29.10
  -6  -6   0  483.85   32.00
  -6  -6   0  468.85   30.60
  -6  -6   0  482.45   34.40
  -6  -6   0  425.06   31.80
  -6  -6   0  459.25   30.20
   6   6   0  439.96   27.80
   6   6   0  400.96   30.50
   6   6   0  445.56   26.00
   6   6   0  423.16   29.60
   6   6   0  449.06   28.60
   6   6   0  489.65   31.90
  -7  -6   0  409.56   28.10
  -7  -6   0  417.06   27.70
  -7  -6   0  414.26   29.70
  -7  -6   0  429.46   29.00
  -7  -6   0  403.96   33.10
  -7  -6   0  421.26   30.70
   7   6   0  389.26   30.00
   7   6   0  376.26   29.80
   7   6   0  382.16   25.40
   7   6   0  380.06   24.80
   7   6   0  435.06   27.90
   7   6   0  391.46   24.10
  -8  -6   0  298.27   23.10
  -8  -6   0  290.97   21.90
  -8  -6   0  270.97   23.70
  -8  -6   0  333.17   30.40
  -8  -6   0  282.37   22.60
  -8  -6   0  292.57   24.40
   8   6   0  260.87   22.30
   8   6   0  319.67   22.90
   8   6   0  277.77   25.00
   8   6   0  258.17   23.50
   8   6   0  268.77   17.30
   8   6   0  278.07   18.30
   8   6   0  272.47   17.70
   8   6   0  256.07   24.70
  -9  -6   0   12.80    8.20
  -9  -6   0   -1.60    7.10
  -9  -6   0    9.60    9.10
  -9  -6   0   -5.20    7.60
  -9  -6   0   -4.20    6.30
   9   6   0    7.20    9.70
   9   6   0   -1.30    9.40
   9   6   0    0.40    4.30
   9   6   0   -2.80    6.30
 -10  -6   0   12.50    8.10
 -10  -6   0    5.20    9.00
 -10  -6   0   25.80    9.80
 -10  -6   0   16.80    9.10
 -10  -6   0   29.30   11.30
  10   6   0   12.00   11.00
  10   6   0   24.90   13.30
  10   6   0   15.60    8.60
 -11  -6   0   46.50   13.00
 -11  -6   0   34.50   10.40
 -11  -6   0   43.80   13.40
 -11  -6   0   74.69   15.80
 -11  -6   0   36.20   10.20
  11   6   0   38.30   11.40
  11   6   0   44.10   15.20
  11   6   0   38.50   14.70
 -12  -6   0  -16.50    9.40
 -12  -6   0   11.80    8.90
 -12  -6   0   26.60   10.40
  12   6   0    7.00   10.10
  12   6   0   16.90   10.00
  12   6   0   23.20   14.50
 -13   7   0   22.30    7.60
 -13   7   0   24.80    8.70
 -12   7   0   10.30    7.80
 -12   7   0   -0.40    6.90
 -11   7   0   19.20    8.60
 -11   7   0   14.60    7.20
 -10   7   0  167.48   23.40
 -10   7   0  167.08   27.10
 -10   7   0  141.59   15.60
 -10   7   0  154.68   23.50
 -10   7   0  169.28   19.70
 -10   7   0  138.29   17.80
 -10   7   0  141.19   16.60
 -10   7   0  182.88   23.00
 -10   7   0  121.59   14.90
 -10   7   0  186.28   24.50
  -9   7   0   51.09   15.30
  -9   7   0   34.00    8.40
  -9   7   0   14.20    9.40
  -9   7   0   27.70    9.00
  -9   7   0   30.40    3.60
  -9   7   0   27.40   11.30
  -9   7   0   61.59   14.00
  -9   7   0   60.39   15.10
  -9   7   0   48.60   13.30
  -9   7   0   42.00   12.20
  -9   7   0   25.20    7.30
  -9   7   0   28.30   10.10
  -9   7   0   30.40    3.10
  -9   7   0   29.90    7.80
   8  -7   0   99.89   18.60
   8  -7   0   86.89   17.10
   8  -7   0   79.79   17.30
   8  -7   0   72.69   16.50
  -8   7   0   84.59    5.90
  -8   7   0  107.39   16.80
  -8   7   0   85.39    6.50
  -8   7   0   84.49   16.10
  -8   7   0   91.19   15.60
  -8   7   0  118.59   16.60
  -8   7   0   75.79   15.70
  -8   7   0   89.39   11.90
  -8   7   0   79.89   14.00
  -8   7   0   74.39   12.80
  -8   7   0   71.79   11.60
  -8   7   0   86.09   13.50
  -8   7   0   69.79   10.20
  -8   7   0   84.79   15.30
  -8   7   0  111.19   13.20
   7  -7   0   92.29   16.90
   7  -7   0   81.49   15.50
   7  -7   0   68.69   14.30
   7  -7   0   51.99   14.90
   7  -7   0   89.39   16.60
  -7   7   0   76.69   10.70
  -7   7   0   79.29   11.40
  -7   7   0   75.89    6.60
  -7   7   0   73.79   11.90
  -7   7   0   70.89    5.90
  -7   7   0   86.09   12.00
  -7   7   0   90.39    6.00
  -7   7   0   96.19   14.70
  -7   7   0   80.89   14.10
  -7   7   0   70.29    9.50
  -7   7   0   86.79   14.90
  -7   7   0   64.29   13.50
  -7   7   0   71.19   12.20
  -7   7   0   96.09   15.60
  -7   7   0   67.69   12.80
   6  -7   0  465.85   35.50
   6  -7   0  444.96   34.70
   6  -7   0  458.25   33.20
   6  -7   0  501.95   35.30
   6  -7   0  427.96   33.30
   6  -7   0  432.96   33.80
  -6   7   0  450.85   27.80
  -6   7   0  440.96   26.80
  -6   7   0  506.05   33.40
  -6   7   0  535.35   34.40
  -6   7   0  537.45   29.40
  -6   7   0  431.66   29.70
  -6   7   0  491.65   26.40
  -6   7   0  455.15   30.40
  -6   7   0  532.65   36.00
  -6   7   0  466.15   30.90
  -6   7   0  452.15   30.40
  -6   7   0  502.85   27.00
  -6   7   0  478.55   30.80
  -6   7   0  490.25   33.00
   5  -7   0   43.50   10.30
   5  -7   0   41.20   11.40
   5  -7   0   52.79    7.10
   5  -7   0   46.70   10.10
   5  -7   0   58.09   12.70
   5  -7   0   36.10    4.70
   5  -7   0   43.20    4.80
   5  -7   0   66.49   12.10
   5  -7   0   63.59   11.50
  -5   7   0   51.99    8.10
  -5   7   0   53.79    6.20
  -5   7   0   47.50    7.60
  -5   7   0   45.00    9.10
  -5   7   0   62.99   12.10
  -5   7   0   50.09    5.30
  -5   7   0   55.59   10.40
  -5   7   0   64.19    8.70
  -5   7   0   52.29    8.50
  -5   7   0   60.39    8.70
  -5   7   0   29.20    5.10
  -5   7   0   46.30    7.10
  -5   7   0   42.80    6.10
   4  -7   0   58.59   11.20
   4  -7   0   64.49    9.90
   4  -7   0   71.79   11.00
   4  -7   0   64.69   10.90
   4  -7   0   75.19    8.10
   4  -7   0   91.49   14.00
   4  -7   0   73.09    7.40
  -4   7   0   55.69    7.10
  -4   7   0   73.89    8.60
  -4   7   0   69.59    8.00
  -4   7   0   87.09   12.50
  -4   7   0   65.49    6.40
  -4   7   0   68.79    8.50
  -4   7   0   69.99    7.40
  -4   7   0   75.49    7.70
  -4   7   0   72.59    9.00
   3  -7   0   25.70   10.00
   3  -7   0   35.00    8.00
   3  -7   0   28.20    6.80
   3  -7   0   26.30    4.00
   3  -7   0   24.20    8.30
   3  -7   0   29.20    4.20
   3  -7   0   31.00    5.50
   3  -7   0   25.70    4.80
   3  -7   0   25.00    6.20
   3  -7   0   32.40    7.70
   3  -7   0   23.30    5.40
  -3   7   0   23.10    5.20
  -3   7   0   26.10    4.30
  -3   7   0   22.30    4.50
  -3   7   0   20.00    5.90
  -3   7   0   25.70    6.60
  -3   7   0   34.10    5.20
  -3   7   0   33.90    5.80
   2  -7   0  220.68   14.40
   2  -7   0  196.98   16.70
   2  -7   0  227.08   18.00
   2  -7   0  195.88   14.50
   2  -7   0  230.98   14.20
   2  -7   0  222.28   14.10
   2  -7   0  215.78   14.80
  -2   7   0  200.18   14.90
  -2   7   0  207.08   14.20
  -2   7   0  188.18   14.00
  -2   7   0  197.78   15.10
  -2   7   0  229.28   17.10
  -2   7   0  209.78   13.70
   1  -7   0  311.97   19.90
   1  -7   0  330.07   21.00
   1  -7   0  349.96   19.60
   1  -7   0  304.47   22.20
   1  -7   0  313.07   21.80
   1  -7   0  306.27   20.60
  -1   7   0  337.97   20.40
  -1   7   0  322.87   19.20
  -1   7   0  282.27   20.60
  -1   7   0  295.67   22.20
  -1   7   0  340.07   21.20
  -1   7   0  317.87   19.30
   0  -7   0   97.99    9.00
   0  -7   0   86.19   10.10
   0  -7   0  116.29   12.40
   0  -7   0   99.59   10.00
   0  -7   0  106.39   11.40
   0   7   0  120.99   11.10
   0   7   0  102.09   12.80
   0   7   0   79.39   10.50
   0   7   0  101.09   10.10
  -1  -7   0  331.77   23.20
  -1  -7   0  292.97   21.30
  -1  -7   0  303.17   20.70
  -1  -7   0  318.07   19.90
  -1  -7   0  328.17   18.60
  -1  -7   0  316.47   21.70
   1   7   0  342.57   22.10
   1   7   0  309.07   23.40
   1   7   0  299.17   21.20
   1   7   0  343.97   21.00
  -2  -7   0   26.20    7.10
  -2  -7   0   11.60    5.80
  -2  -7   0   20.80    6.30
  -2  -7   0   16.80    7.50
  -2  -7   0   15.20    4.70
  -2  -7   0   10.20    4.40
   2   7   0   25.10    6.20
   2   7   0   34.10    7.50
   2   7   0    9.30    7.30
   2   7   0   16.70    6.50
  -3  -7   0   22.90    6.90
  -3  -7   0   18.80    7.10
  -3  -7   0   11.30    5.30
  -3  -7   0    8.40    5.70
  -3  -7   0   15.70    7.50
  -3  -7   0    5.70    6.60
   3   7   0   16.90    6.70
   3   7   0   17.20    5.90
   3   7   0   11.50    7.50
   3   7   0    6.80    5.60
  -4  -7   0   93.59   12.30
  -4  -7   0   95.99   12.30
  -4  -7   0  116.69   14.20
  -4  -7   0   88.29   11.30
  -4  -7   0   87.69   13.40
  -4  -7   0  111.79   11.90
   4   7   0   83.89    7.80
   4   7   0  108.89    7.20
   4   7   0  130.39   16.40
   4   7   0  106.49   12.10
   4   7   0  111.29   11.00
   4   7   0   86.99   10.70
   4   7   0   80.89   11.00
  -5  -7   0  230.88   21.20
  -5  -7   0  204.08   18.00
  -5  -7   0  228.18   19.30
  -5  -7   0  245.88   21.90
  -5  -7   0  254.07   19.50
  -5  -7   0  259.67   19.50
   5   7   0  196.88   17.60
   5   7   0  216.38   17.20
   5   7   0  220.78   14.30
   5   7   0  215.08   19.20
   5   7   0  232.88   14.10
   5   7   0  240.08   21.60
   5   7   0  239.88   19.20
  -6  -7   0   52.29   10.00
  -6  -7   0   66.99   12.30
  -6  -7   0   38.70   12.30
  -6  -7   0   48.10   10.20
  -6  -7   0   58.59   11.60
  -6  -7   0   66.79   12.00
   6   7   0   43.90    4.70
   6   7   0   50.79    5.70
   6   7   0   66.79    9.90
   6   7   0   55.49   11.40
   6   7   0   65.79    9.40
   6   7   0   37.90   10.50
   6   7   0   56.29   11.10
  -7  -7   0  110.29   15.20
  -7  -7   0  115.29   16.40
  -7  -7   0  103.79   17.40
  -7  -7   0  132.69   14.80
  -7  -7   0   93.19   14.90
  -7  -7   0  127.29   15.00
   7   7   0  110.59   14.70
   7   7   0  102.19   15.90
   7   7   0   91.79   14.70
   7   7   0   99.79   11.30
   7   7   0  110.99    9.20
   7   7   0  117.39   12.40
   7   7   0  102.89   13.00
  -8  -7   0   15.20   12.50
  -8  -7   0   18.50    8.50
  -8  -7   0   14.70    8.70
  -8  -7   0   25.40   11.30
  -8  -7   0   15.30    8.10
   8   7   0   12.60   10.40
   8   7   0   18.90    4.40
   8   7   0   21.20    5.40
   8   7   0   32.50    9.30
   8   7   0   18.70    8.00
  -9  -7   0   72.39   13.00
  -9  -7   0   57.19   14.10
  -9  -7   0   55.49   11.20
  -9  -7   0   76.69   12.70
   9   7   0   51.49   14.20
   9   7   0   42.70   13.50
   9   7   0   49.20   11.10
 -10  -7   0   71.69   14.70
 -10  -7   0   61.09   12.90
 -10  -7   0   71.99   13.30
 -10  -7   0  102.09   15.60
 -10  -7   0   90.39   17.20
  10   7   0   75.19   13.40
  10   7   0   41.70   15.40
  10   7   0   64.59   15.80
 -11  -7   0  337.27   27.20
 -11  -7   0  289.97   30.30
 -11  -7   0  375.66   30.70
 -11  -7   0  277.87   25.90
 -11  -7   0  352.66   30.70
  11   7   0  311.97   27.10
  11   7   0  305.97   31.90
  11   7   0  360.36   32.90
 -13   8   0   33.20   10.10
 -13   8   0   23.40    8.20
 -12   8   0   10.90    7.60
 -12   8   0    1.70    7.00
 -11   8   0   30.70    8.90
 -11   8   0   28.40    3.20
 -11   8   0   31.10    8.50
 -10   8   0   69.39   14.10
 -10   8   0   74.89   19.10
 -10   8   0   59.49   14.10
 -10   8   0   75.29   20.00
 -10   8   0   79.49   18.60
 -10   8   0   45.00    9.10
 -10   8   0   57.89    4.80
 -10   8   0   79.39   15.80
 -10   8   0   46.00    9.70
 -10   8   0   51.79    5.30
   9  -8   0   -2.70   10.10
  -9   8   0    6.50   10.00
  -9   8   0   -1.20    2.00
  -9   8   0    5.10    3.00
  -9   8   0   10.00    8.10
  -9   8   0    4.40    5.40
  -9   8   0    8.80   10.90
  -9   8   0   -1.40    7.50
  -9   8   0   -0.50    5.40
  -9   8   0    2.60    6.10
  -9   8   0   -1.60    9.60
  -9   8   0  -13.70    7.80
  -9   8   0    0.50    8.10
   8  -8   0  189.68   25.20
   8  -8   0  154.08   22.60
   8  -8   0  175.78   24.20
   8  -8   0  180.78   22.30
  -8   8   0  167.48   15.00
  -8   8   0  186.08   17.30
  -8   8   0  176.18   11.80
  -8   8   0  188.18   20.50
  -8   8   0  152.38   17.40
  -8   8   0  179.48   16.70
  -8   8   0  189.88   20.60
  -8   8   0  174.38   20.50
  -8   8   0  171.18   21.90
  -8   8   0  162.58   17.60
  -8   8   0  181.68   17.30
  -8   8   0  169.38   10.90
   7  -8   0   18.80   11.10
   7  -8   0   29.70   11.50
   7  -8   0   18.60   11.80
   7  -8   0   42.80   13.00
   7  -8   0   18.10   10.60
  -7   8   0   22.50    7.50
  -7   8   0   24.90    5.00
  -7   8   0   29.00   11.00
  -7   8   0   21.70    8.10
  -7   8   0   12.70    7.60
  -7   8   0   20.90    5.40
  -7   8   0   22.30    4.30
  -7   8   0   27.60    4.20
  -7   8   0   25.40   10.40
  -7   8   0   25.80    6.40
  -7   8   0   36.40   11.80
  -7   8   0   44.80   10.00
   6  -8   0  334.77   28.60
   6  -8   0  275.27   25.90
   6  -8   0  297.87   25.40
   6  -8   0  315.97   27.30
   6  -8   0  305.37   26.30
   6  -8   0  248.68   25.80
  -6   8   0  294.37   19.50
  -6   8   0  343.77   21.30
  -6   8   0  324.07   27.20
  -6   8   0  320.97   23.50
  -6   8   0  295.97   22.70
  -6   8   0  311.27   22.60
  -6   8   0  346.37   22.80
  -6   8   0  320.07   21.20
  -6   8   0  301.37   22.60
  -6   8   0  346.27   20.00
  -6   8   0  412.96   27.60
  -6   8   0  341.87   19.20
   5  -8   0  247.48   23.40
   5  -8   0  263.17   22.00
   5  -8   0  274.87   30.50
   5  -8   0  319.77   18.10
   5  -8   0  282.97   17.90
   5  -8   0  286.67   19.70
   5  -8   0  337.67   26.20
   5  -8   0  280.27   24.50
   5  -8   0  269.97   23.60
  -5   8   0  328.37   19.30
  -5   8   0  351.16   24.90
  -5   8   0  269.77   20.10
  -5   8   0  303.07   18.00
  -5   8   0  283.57   19.80
  -5   8   0  259.37   18.40
  -5   8   0  315.47   20.80
  -5   8   0  293.57   18.70
  -5   8   0  272.57   19.80
  -5   8   0  314.17   20.60
   4  -8   0  165.58   18.10
   4  -8   0  178.18   13.10
   4  -8   0  170.68   16.90
   4  -8   0  161.48   14.70
   4  -8   0  171.28   15.70
   4  -8   0  150.48   16.70
   4  -8   0  140.59   15.60
   4  -8   0  180.38   13.20
  -4   8   0  174.38   12.90
  -4   8   0  142.89   12.40
  -4   8   0  202.28   12.80
  -4   8   0  194.28   12.40
  -4   8   0  164.48   14.20
  -4   8   0  187.08   13.30
   3  -8   0   86.09    8.30
   3  -8   0   76.89    8.40
   3  -8   0   63.19   10.90
   3  -8   0   70.49    7.50
   3  -8   0   84.39    9.60
   3  -8   0   71.29    9.30
   3  -8   0   70.09   12.70
  -3   8   0   83.59   10.50
  -3   8   0   68.59    7.70
  -3   8   0   73.99    8.90
  -3   8   0   77.49    8.80
  -3   8   0   75.69    8.40
  -3   8   0   75.89    7.60
   2  -8   0  293.57   18.70
   2  -8   0  277.17   21.60
   2  -8   0  317.17   19.80
   2  -8   0  275.57   26.30
   2  -8   0  290.77   18.70
   2  -8   0  306.07   20.00
   2  -8   0  288.67   18.50
   2  -8   0  313.27   21.10
  -2   8   0  333.07   20.50
  -2   8   0  271.37   18.60
  -2   8   0  288.07   19.90
  -2   8   0  286.67   19.10
  -2   8   0  301.17   18.40
  -2   8   0  308.67   21.70
   1  -8   0    2.70    6.70
   1  -8   0    1.00    4.90
   1  -8   0   -2.40    4.30
   1  -8   0    4.80    6.70
   1  -8   0    8.10    3.80
   1  -8   0    1.80    5.60
  -1   8   0    5.60    7.30
  -1   8   0    1.00    4.60
  -1   8   0    5.60    5.40
  -1   8   0    4.80    3.20
  -1   8   0    4.00    3.40
  -1   8   0    1.20    5.60
   0  -8   0  494.75   32.40
   0  -8   0  515.85   31.00
   0  -8   0  551.54   29.60
   0  -8   0  500.15   31.10
   0   8   0  496.35   31.30
   0   8   0  515.95   30.40
   0   8   0  446.96   32.20
   0   8   0  465.95   32.80
  -1  -8   0  206.28   15.20
  -1  -8   0  193.58   14.00
  -1  -8   0  191.88   15.80
  -1  -8   0  188.88   15.70
  -1  -8   0  194.48   17.30
   1   8   0  188.38   16.00
   1   8   0  198.88   15.80
   1   8   0  198.88   15.10
   1   8   0  185.08   17.90
  -2  -8   0   67.49    7.90
  -2  -8   0   63.49   11.40
  -2  -8   0   66.49    9.80
  -2  -8   0   80.09   10.90
  -2  -8   0   76.89   10.70
   2   8   0   87.99   11.50
   2   8   0   92.79   11.70
   2   8   0   71.89   12.70
  -3  -8   0    0.60    5.60
  -3  -8   0   11.90    6.40
  -3  -8   0    5.50    6.70
  -3  -8   0   -2.50    4.40
  -3  -8   0    1.80    5.70
  -3  -8   0   -2.20    4.00
  -3  -8   0    4.40    7.20
   3   8   0    2.90    8.00
   3   8   0    8.30    5.60
   3   8   0   -0.60    5.30
   3   8   0    2.00    5.90
  -4  -8   0   13.70    7.80
  -4  -8   0    4.40    6.60
  -4  -8   0   14.80    7.40
  -4  -8   0    7.30    6.60
  -4  -8   0   11.40    7.40
  -4  -8   0    7.40    7.60
   4   8   0   10.60    4.00
   4   8   0    4.30    8.30
   4   8   0   11.40    6.30
   4   8   0   14.30    6.20
   4   8   0    9.50    7.20
  -5  -8   0  406.76   29.60
  -5  -8   0  451.35   31.80
  -5  -8   0  435.56   29.80
  -5  -8   0  392.36   28.40
  -5  -8   0  377.96   30.90
  -5  -8   0  395.16   28.90
   5   8   0  455.15   30.20
   5   8   0  419.96   28.20
   5   8   0  390.56   24.50
   5   8   0  443.06   27.90
   5   8   0  398.46   28.80
   5   8   0  433.16   23.70
   5   8   0  438.66   32.40
  -6  -8   0   50.49   11.00
  -6  -8   0   34.30   10.60
  -6  -8   0   36.80    9.30
  -6  -8   0   38.30   10.00
  -6  -8   0   36.90   11.60
  -6  -8   0   44.70   10.30
   6   8   0   28.90    9.70
   6   8   0   39.30    4.60
   6   8   0   32.40    7.80
   6   8   0   28.10   10.80
   6   8   0   29.20    8.90
   6   8   0   63.19   10.50
   6   8   0   37.90    4.70
  -7  -8   0   23.50    8.60
  -7  -8   0    6.30   11.20
  -7  -8   0   20.40    8.70
  -7  -8   0   21.70    9.70
  -7  -8   0    5.60    5.40
  -7  -8   0   11.80    6.40
   7   8   0   22.70    4.00
   7   8   0   33.40    8.30
   7   8   0   29.50   10.80
   7   8   0   20.70    7.90
   7   8   0   31.20    9.20
   7   8   0   16.00    9.90
  -8  -8   0    8.60    8.80
  -8  -8   0    2.70    9.20
  -8  -8   0   -1.50    7.50
  -8  -8   0   19.80    9.90
  -8  -8   0    7.80    8.30
  -8  -8   0    1.40   10.70
   8   8   0    5.50    9.10
   8   8   0   -8.70    5.20
   8   8   0    3.80    6.80
   8   8   0    3.40    9.50
   8   8   0    7.80    5.00
  -9  -8   0   14.70   11.00
  -9  -8   0    2.10    6.90
  -9  -8   0   22.20    9.00
  -9  -8   0   11.60    8.70
   9   8   0   -8.40    4.10
   9   8   0    6.10    8.20
   9   8   0    1.80    9.50
   9   8   0   -0.40    1.70
   9   8   0   -8.90    9.00
   9   8   0   -0.50    1.60
 -10  -8   0   32.40   11.10
 -10  -8   0   71.99   16.70
 -10  -8   0   76.29   24.50
 -10  -8   0   59.49   12.80
 -10  -8   0   44.50   14.40
  10   8   0   75.89   17.10
  10   8   0   31.50   10.10
  10   8   0   48.00   16.10
 -11  -8   0   14.40   12.10
 -11  -8   0    2.20    9.70
 -11  -8   0   -1.80    8.50
  11   8   0   22.80   12.10
  11   8   0    6.00    8.70
  11   8   0   -3.60   11.60
 -13   9   0  286.27   23.40
 -13   9   0  249.18   22.80
 -12   9   0   48.10   10.30
 -11   9   0    3.60    2.90
 -11   9   0    0.50    6.60
 -11   9   0    8.50    6.40
 -10   9   0   15.10    3.30
 -10   9   0    4.90    6.60
 -10   9   0    5.60    3.60
 -10   9   0    1.00    5.80
 -10   9   0   13.40   10.00
 -10   9   0   18.00   13.30
   9  -9   0   -1.20   10.70
   9  -9   0   -2.20   10.00
   9  -9   0   -7.30    9.40
   9  -9   0    1.50   10.40
  -9   9   0    1.00    7.10
  -9   9   0    6.90    8.30
  -9   9   0    6.20    6.30
  -9   9   0    3.60    2.60
  -9   9   0    3.20    7.70
  -9   9   0    0.30    9.40
  -9   9   0    7.20    9.90
  -9   9   0    1.90    5.10
  -9   9   0    8.00    8.70
  -9   9   0    0.90    3.30
   8  -9   0  198.38   27.10
   8  -9   0  218.98   24.50
   8  -9   0  191.58   24.00
   8  -9   0  210.08   25.20
   8  -9   0  235.98   24.70
  -8   9   0  222.98   13.90
  -8   9   0  212.68   19.10
  -8   9   0  259.87   28.20
  -8   9   0  197.98   20.10
  -8   9   0  210.68   19.30
  -8   9   0  222.68   14.70
  -8   9   0  214.08   16.80
  -8   9   0  212.18   26.50
  -8   9   0  207.18   22.10
  -8   9   0  230.58   20.10
  -8   9   0  200.58   14.20
  -8   9   0  216.68   13.60
   7  -9   0   18.60    9.90
   7  -9   0   14.10   10.50
   7  -9   0    6.30    9.60
   7  -9   0   -4.80    9.00
   7  -9   0   10.20   10.70
  -7   9   0   34.60    8.50
  -7   9   0   13.70    5.10
  -7   9   0   19.80    4.20
  -7   9   0   22.50    6.00
  -7   9   0   13.50    9.80
  -7   9   0   24.00    7.90
  -7   9   0   18.70    5.90
  -7   9   0    9.40    7.30
  -7   9   0   13.20    4.50
  -7   9   0    6.60    7.30
   6  -9   0  184.98   20.80
   6  -9   0  175.28   18.60
   6  -9   0  166.88   19.20
   6  -9   0  171.28   21.00
   6  -9   0  170.38   19.10
   6  -9   0  166.78   10.80
   6  -9   0  177.48   10.80
   6  -9   0  167.98   20.00
  -6   9   0  168.28   13.40
  -6   9   0  175.78   12.10
  -6   9   0  140.39   14.90
  -6   9   0  188.58   19.80
  -6   9   0  171.48   14.90
  -6   9   0  159.28   13.00
  -6   9   0  144.59   15.40
  -6   9   0  177.98   15.30
  -6   9   0  143.49   12.60
   5  -9   0   -4.20    7.00
   5  -9   0    0.10    3.80
   5  -9   0    6.20    7.00
   5  -9   0    0.00    8.70
   5  -9   0   -2.40    3.80
   5  -9   0   -2.00    3.70
   5  -9   0    0.80    8.20
   5  -9   0    6.20    6.70
   5  -9   0   -4.20    6.50
  -5   9   0    4.20    4.00
  -5   9   0  -11.30    3.80
  -5   9   0    1.50    4.10
  -5   9   0   -2.80    5.00
  -5   9   0    5.90    3.80
  -5   9   0   -4.30    4.00
  -5   9   0   -2.40    4.10
  -5   9   0   -2.50    4.40
   4  -9   0  161.58   18.20
   4  -9   0  192.18   11.20
   4  -9   0  193.98   14.30
   4  -9   0  148.89   16.90
   4  -9   0  174.68   15.60
   4  -9   0  182.18   13.80
   4  -9   0  198.58   16.90
   4  -9   0  178.58   14.30
   4  -9   0  193.68   19.80
   4  -9   0  178.58   17.60
  -4   9   0  182.08   16.00
  -4   9   0  189.38   14.60
  -4   9   0  205.98   14.90
  -4   9   0  186.08   13.00
  -4   9   0  205.68   14.80
  -4   9   0  177.98   13.50
  -4   9   0  209.08   13.70
   3  -9   0  142.99   11.40
   3  -9   0  134.79   10.50
   3  -9   0  112.29   14.60
   3  -9   0  147.79   11.60
   3  -9   0  137.89   13.00
   3  -9   0  138.59   11.70
   3  -9   0  118.09   15.60
   3  -9   0  138.49   12.20
  -3   9   0  152.78   11.10
  -3   9   0  129.39   11.30
  -3   9   0  152.38   11.90
  -3   9   0  145.29   12.80
  -3   9   0  144.19   14.50
  -3   9   0  136.59   12.10
   2  -9   0  200.98   14.90
   2  -9   0  182.28   18.50
   2  -9   0  214.88   14.50
   2  -9   0  229.88   16.40
   2  -9   0  212.18   18.20
   2  -9   0  210.68   15.00
   2  -9   0  216.58   17.70
  -2   9   0  203.58   15.60
  -2   9   0  220.08   14.70
  -2   9   0  218.28   16.50
  -2   9   0  242.18   15.30
  -2   9   0  222.88   18.90
   1  -9   0  333.77   25.30
   1  -9   0  374.26   23.90
   1  -9   0  321.67   23.30
   1  -9   0  345.07   24.00
   1  -9   0  346.97   24.80
   1  -9   0  388.26   22.20
  -1   9   0  377.76   21.70
  -1   9   0  342.37   22.90
  -1   9   0  371.86   24.20
  -1   9   0  318.47   23.50
  -1   9   0  355.76   26.00
   0  -9   0   33.00    8.40
   0  -9   0   25.10    7.40
   0  -9   0   20.90    6.80
   0  -9   0   22.90    6.70
   0  -9   0   25.10    5.20
   0   9   0   30.20    9.30
   0   9   0   21.00    6.50
   0   9   0   19.80    6.90
  -1  -9   0   -3.90    5.20
  -1  -9   0    5.40    6.10
  -1  -9   0    5.00    7.50
  -1  -9   0    0.80    4.00
  -1  -9   0   -4.70    4.60
   1   9   0    9.30    6.00
   1   9   0    1.10    6.00
   1   9   0    1.00    5.60
   1   9   0    1.10    4.80
  -2  -9   0   62.59    7.30
  -2  -9   0   61.59   10.30
  -2  -9   0   65.89   11.00
  -2  -9   0   72.09   12.70
  -2  -9   0   63.79    8.30
  -2  -9   0   50.59    9.30
   2   9   0   55.29   12.60
   2   9   0   68.89    9.90
   2   9   0   82.49   12.10
   2   9   0   87.29   11.60
  -3  -9   0   16.70    6.00
  -3  -9   0   21.40    6.30
  -3  -9   0   19.70    8.20
  -3  -9   0   20.70    8.00
  -3  -9   0   32.30    8.30
  -3  -9   0   30.20   10.10
  -3  -9   0   21.80    8.50
   3   9   0   23.40    8.10
   3   9   0   13.40    7.30
   3   9   0   29.50    7.70
   3   9   0   21.40   10.70
  -4  -9   0  627.44   41.40
  -4  -9   0  615.74   40.20
  -4  -9   0  659.33   41.90
  -4  -9   0  661.33   41.60
  -4  -9   0  586.04   42.50
  -4  -9   0  656.43   39.50
   4   9   0  623.34   40.20
   4   9   0  675.03   40.10
   4   9   0  647.94   44.40
   4   9   0  700.33   42.30
   4   9   0  675.73   37.20
  -5  -9   0    1.20    8.50
  -5  -9   0    5.20    7.00
  -5  -9   0    1.60    7.20
  -5  -9   0    3.80    7.50
  -5  -9   0    6.30    7.70
  -5  -9   0   13.50    9.30
   5   9   0    1.30    6.70
   5   9   0    8.80    2.50
   5   9   0    2.40    3.60
   5   9   0   10.80    7.70
   5   9   0   -1.80    8.60
   5   9   0   17.60    7.30
   5   9   0    1.50    7.00
  -6  -9   0   40.10   11.70
  -6  -9   0   13.70    8.70
  -6  -9   0   22.00    9.20
  -6  -9   0   47.60   10.70
  -6  -9   0   20.40   10.70
   6   9   0   25.90    4.40
   6   9   0   25.60   10.70
   6   9   0   25.80    7.70
   6   9   0   40.00   10.20
   6   9   0   23.40    3.50
   6   9   0   23.00    8.10
   6   9   0   30.60    9.90
  -7  -9   0   59.19   12.80
  -7  -9   0   57.39   12.30
  -7  -9   0   49.40   10.80
   7   9   0   66.59   12.70
   7   9   0   58.09    9.60
   7   9   0   63.09   11.10
   7   9   0   46.30    5.20
   7   9   0   50.39   12.30
   7   9   0   61.79   13.40
  -8  -9   0   20.50    9.50
  -8  -9   0    7.40    9.80
  -8  -9   0  -23.30   10.50
  -8  -9   0   22.20   15.10
  -8  -9   0   19.60   10.90
   8   9   0   13.20   10.30
   8   9   0   17.40    8.70
   8   9   0    7.80   10.30
   8   9   0   22.30    7.70
   8   9   0   14.80    5.80
  -9  -9   0   -2.60    9.40
  -9  -9   0   28.40   10.00
  -9  -9   0   22.80    8.70
  -9  -9   0    9.30    9.40
   9   9   0    0.40    2.70
   9   9   0    2.70    2.70
   9   9   0   31.90   14.30
   9   9   0    8.30   11.00
   9   9   0   -2.40    4.30
   9   9   0    6.10   14.40
 -10  -9   0   41.30   12.70
 -10  -9   0   49.80   13.50
 -10  -9   0   77.99   17.00
 -10  -9   0   96.29   14.50
  10   9   0   61.99   17.10
  10   9   0   66.99   17.10
  10   9   0   59.39   12.80
 -12  10   0   85.69    6.70
 -12  10   0   86.29   13.80
 -12  10   0   83.99    6.50
 -12  10   0   88.29   12.40
 -11  10   0    3.80    6.20
 -11  10   0    7.20    9.70
 -11  10   0   10.90    3.20
 -11  10   0    4.10    3.20
 -10  10   0   36.30    5.00
 -10  10   0   33.50    5.50
 -10  10   0   26.70   10.30
 -10  10   0   25.40    7.70
 -10  10   0   27.20    9.10
   9 -10   0   83.59   19.90
   9 -10   0   64.69   17.30
   9 -10   0  111.69   21.70
  -9  10   0   78.69   10.30
  -9  10   0   77.29    7.50
  -9  10   0   75.29   13.90
  -9  10   0   69.09    8.50
  -9  10   0   69.59   12.40
  -9  10   0   72.69   12.60
  -9  10   0   90.79   13.80
   8 -10   0   80.59   17.40
   8 -10   0   73.09   17.40
   8 -10   0   64.29   18.00
   8 -10   0   96.09   17.70
   8 -10   0   93.59   18.50
  -8  10   0  101.99   13.50
  -8  10   0   75.79   12.60
  -8  10   0   96.09   13.70
  -8  10   0   92.99   18.30
  -8  10   0   66.99    7.90
  -8  10   0   77.89    8.00
  -8  10   0   88.59    9.30
  -8  10   0   82.19   10.10
  -8  10   0   54.59   11.30
  -8  10   0   73.89   13.20
  -8  10   0   77.59    9.40
   7 -10   0  199.28   22.10
   7 -10   0  197.58   22.80
   7 -10   0  195.18   23.50
   7 -10   0  176.18   23.90
   7 -10   0  198.38   27.10
  -7  10   0  194.48   18.40
  -7  10   0  207.88   13.90
  -7  10   0  190.08   15.00
  -7  10   0  190.08   17.10
  -7  10   0  185.38   14.60
  -7  10   0  186.78   17.10
  -7  10   0  174.78   15.70
  -7  10   0  184.58   14.20
   6 -10   0   31.00    7.00
   6 -10   0   47.90    6.40
   6 -10   0   29.10   11.30
   6 -10   0   26.60   13.00
   6 -10   0   44.70   11.70
   6 -10   0   47.40   13.70
   6 -10   0   31.00   10.20
   6 -10   0   41.40    6.00
   6 -10   0   29.50   12.20
  -6  10   0   44.30    8.20
  -6  10   0   27.70    6.40
  -6  10   0   48.40    9.30
  -6  10   0   41.10    6.70
  -6  10   0   39.90    7.20
  -6  10   0   40.10    8.60
  -6  10   0   42.20    6.60
  -6  10   0   44.10    9.60
  -6  10   0   39.30    9.10
   5 -10   0    4.60    8.20
   5 -10   0   -1.30    4.10
   5 -10   0    5.80    9.10
   5 -10   0    2.10    7.60
   5 -10   0    4.10    6.90
   5 -10   0   -4.80    9.00
   5 -10   0    1.10    7.20
   5 -10   0    2.80    4.70
   5 -10   0    6.20    4.70
  -5  10   0    1.20    6.60
  -5  10   0    1.20    4.00
  -5  10   0    6.30    5.40
  -5  10   0   -0.70    1.70
  -5  10   0   -1.60    4.10
  -5  10   0    1.20    4.90
  -5  10   0    4.50    4.20
  -5  10   0    2.70    4.80
   4 -10   0  179.08   12.00
   4 -10   0  164.18   18.00
   4 -10   0  152.58   17.40
   4 -10   0  187.08   14.30
   4 -10   0  186.68   15.80
   4 -10   0  182.08   15.10
   4 -10   0  180.08   14.20
   4 -10   0  162.78   18.60
   4 -10   0  188.88   12.00
   4 -10   0  149.99   16.00
   4 -10   0  182.78   20.20
  -4  10   0  168.98   14.50
  -4  10   0  170.58   14.80
  -4  10   0  202.28   13.80
  -4  10   0  177.38   13.90
  -4  10   0  179.68   16.80
  -4  10   0  189.88   17.20
   3 -10   0  795.12   50.99
   3 -10   0  806.52   48.60
   3 -10   0  852.51   47.20
   3 -10   0  813.02   46.40
   3 -10   0  846.62   47.20
   3 -10   0  840.62   47.10
   3 -10   0  726.73   50.59
   3 -10   0  778.12   51.99
   3 -10   0  837.62   47.90
  -3  10   0  813.32   48.30
  -3  10   0  956.30   49.30
  -3  10   0  842.22   48.50
  -3  10   0  784.32   49.00
  -3  10   0  875.71   46.60
   2 -10   0  146.19   16.70
   2 -10   0  134.49   13.00
   2 -10   0  136.29   11.00
   2 -10   0  128.49   15.10
   2 -10   0  150.88   12.10
   2 -10   0  134.49   15.00
   2 -10   0  154.18   13.90
  -2  10   0  142.29   12.70
  -2  10   0  135.99   15.40
  -2  10   0  155.18   12.10
  -2  10   0  161.08   14.10
  -2  10   0  149.88   11.90
  -2  10   0  133.39   13.80
   1 -10   0  739.13   43.50
   1 -10   0  774.72   41.70
   1 -10   0  763.82   43.50
   1 -10   0  724.43   44.70
   1 -10   0  715.33   44.20
   1 -10   0  703.33   45.10
   1 -10   0  636.74   41.80
  -1  10   0  742.73   46.10
  -1  10   0  653.23   43.30
  -1  10   0  679.13   43.10
  -1  10   0  750.42   42.80
  -1  10   0  776.42   41.10
   0 -10   0  257.87   22.20
   0 -10   0  262.37   19.50
   0 -10   0  253.77   19.30
   0 -10   0  259.27   21.80
   0 -10   0  289.47   21.20
   0  10   0  284.57   23.30
   0  10   0  240.08   20.30
   0  10   0  282.97   19.80
   0  10   0  245.18   20.40
   0  10   0  287.87   17.10
  -1 -10   0  220.28   18.40
  -1 -10   0  243.68   19.50
  -1 -10   0  231.48   20.80
  -1 -10   0  249.18   17.20
  -1 -10   0  233.58   19.40
   1  10   0  244.88   19.50
   1  10   0  239.48   18.20
   1  10   0  216.58   21.90
   1  10   0  248.68   19.80
  -2 -10   0   45.30   11.60
  -2 -10   0   53.39    8.10
  -2 -10   0   51.89   10.70
  -2 -10   0   60.29   10.10
  -2 -10   0   40.00   10.00
   2  10   0   43.10   10.00
   2  10   0   67.49   14.50
   2  10   0   44.30   11.80
   2  10   0   64.39   10.40
  -3 -10   0   -1.60    6.90
  -3 -10   0   -2.50    4.90
  -3 -10   0    0.60    2.70
  -3 -10   0    0.70    4.80
  -3 -10   0   -7.90    8.00
  -3 -10   0   -4.10    6.60
  -3 -10   0   -4.10    6.10
   3  10   0    4.30    7.50
   3  10   0    6.40    9.20
   3  10   0    3.10    6.40
   3  10   0    6.50    7.00
  -4 -10   0    8.30    6.80
  -4 -10   0    4.30    7.80
  -4 -10   0   10.00    7.70
  -4 -10   0   -0.90    4.20
  -4 -10   0    4.80    8.20
  -4 -10   0   -6.90    4.10
  -4 -10   0    4.20    9.00
   4  10   0   14.80    6.70
   4  10   0    9.50   10.60
   4  10   0    6.10    4.30
   4  10   0    8.40    7.20
   4  10   0    5.20    8.00
  -5 -10   0  170.18   18.60
  -5 -10   0  131.89   17.60
  -5 -10   0  147.89   15.70
  -5 -10   0  128.19   19.00
  -5 -10   0  115.09   15.50
   5  10   0  153.18   17.40
   5  10   0  151.08   17.40
   5  10   0  153.08   21.50
   5  10   0  149.69   11.80
   5  10   0  132.39   15.70
   5  10   0  124.49   14.20
   5  10   0  141.79    8.90
  -6 -10   0   -8.90    8.70
  -6 -10   0   21.30   10.80
  -6 -10   0    4.90    8.50
  -6 -10   0   -1.20    8.40
  -6 -10   0    4.30    7.80
  -6 -10   0  -15.70    6.00
   6  10   0    3.60    3.40
   6  10   0    1.30    7.90
   6  10   0    4.10    6.20
   6  10   0   -0.30    1.50
   6  10   0   -9.50    7.60
   6  10   0   -1.70    9.40
   6  10   0   11.20    8.30
  -7 -10   0  108.89   17.10
  -7 -10   0  105.89   18.30
   7  10   0  103.59   14.30
   7  10   0   86.29   12.10
   7  10   0   92.09   16.20
   7  10   0   84.99   15.70
  -8 -10   0    5.00   11.00
  -8 -10   0   16.90   12.10
  -8 -10   0    4.00    8.80
  -8 -10   0    8.70    9.40
   8  10   0   -5.50    7.30
   8  10   0    7.40    6.90
   8  10   0    7.30    6.40
   8  10   0   17.90   11.40
   8  10   0   -3.60    9.20
  -9 -10   0    5.90    9.10
  -9 -10   0   -8.80    8.40
  -9 -10   0    4.90   10.80
  -9 -10   0   24.50    9.00
   9  10   0    2.70    9.80
   9  10   0   -8.40    7.50
   9  10   0   -2.90   11.50
   9  10   0   -0.50    3.20
 -10 -10   0   15.70   14.30
 -10 -10   0   -0.80    9.00
  10  10   0    4.50   14.10
  10  10   0   13.90    7.70
  10  10   0   10.80    9.10
 -12  11   0   80.99   14.10
 -12  11   0   81.99    7.40
 -12  11   0   87.69    7.60
 -12  11   0   84.79   11.60
 -11  11   0   33.20    5.80
 -11  11   0   30.10    7.90
 -11  11   0   22.60    9.60
 -11  11   0   28.00    4.80
  10 -11   0   80.49   19.90
  10 -11   0  104.79   23.30
  10 -11   0   97.09   23.30
  10 -11   0  129.49   25.40
 -10  11   0   78.39    9.00
 -10  11   0   64.29   13.60
 -10  11   0   89.09   11.10
 -10  11   0   91.79   14.40
 -10  11   0   94.29    8.40
   9 -11   0    2.70    9.50
   9 -11   0    8.10   11.80
   9 -11   0  -12.10   10.30
   9 -11   0  -21.20    8.90
  -9  11   0    4.80    4.30
  -9  11   0   -0.60    7.00
  -9  11   0    7.30    4.60
  -9  11   0    8.40    7.30
  -9  11   0    3.70    5.40
  -9  11   0   -0.10    7.20
  -9  11   0    0.90    3.60
  -9  11   0    2.20    3.70
   8 -11   0   56.99   16.90
   8 -11   0   46.10   13.60
   8 -11   0   69.69   16.60
   8 -11   0   52.89   17.40
   8 -11   0   34.00   14.50
  -8  11   0   65.09   11.70
  -8  11   0   45.70    7.60
  -8  11   0   45.40   10.30
  -8  11   0   51.99    7.30
  -8  11   0   38.20    6.90
  -8  11   0   35.40    9.70
  -8  11   0   45.00    9.40
  -8  11   0   57.29   12.90
  -8  11   0   46.70    7.70
  -8  11   0   42.20    9.70
   7 -11   0    8.30    9.70
   7 -11   0   -4.40   10.90
   7 -11   0   12.40   11.70
   7 -11   0    4.30    8.80
   7 -11   0   29.10   11.90
  -7  11   0   13.30    5.60
  -7  11   0   10.40    5.00
  -7  11   0   18.20    6.20
  -7  11   0   12.10    7.20
  -7  11   0   19.80    7.20
  -7  11   0   15.60    7.10
  -7  11   0   18.50    5.40
  -7  11   0   -1.80    6.60
   6 -11   0   15.40    5.60
   6 -11   0   13.90    9.20
   6 -11   0   32.00   12.00
   6 -11   0    5.30    8.70
   6 -11   0   12.20    5.00
   6 -11   0   12.00   12.20
   6 -11   0    7.90   10.70
   6 -11   0   14.70    5.70
   6 -11   0    9.60    9.00
  -6  11   0   12.80    5.10
  -6  11   0   11.50    5.60
  -6  11   0   14.00    6.60
  -6  11   0   24.00    7.90
  -6  11   0   13.40    6.80
   5 -11   0   39.60    9.80
   5 -11   0   25.70    7.10
   5 -11   0   15.90   11.20
   5 -11   0   23.90   10.70
   5 -11   0   32.60   11.10
   5 -11   0   30.50    6.80
   5 -11   0   31.70    9.70
   5 -11   0   26.00   12.10
  -5  11   0   34.10    6.30
  -5  11   0   32.60    7.70
  -5  11   0   27.90    9.60
  -5  11   0   25.90    6.60
  -5  11   0   38.20    8.30
  -5  11   0   37.50    8.10
   4 -11   0   51.69   12.20
   4 -11   0   62.49   12.20
   4 -11   0   38.30   12.00
   4 -11   0   60.09    7.20
   4 -11   0   47.50    9.60
   4 -11   0   52.79    8.20
   4 -11   0   43.80   14.00
   4 -11   0   55.29    6.80
   4 -11   0   62.49    9.80
  -4  11   0   52.69    9.30
  -4  11   0   48.80    7.20
  -4  11   0   58.79    8.70
  -4  11   0   53.59    8.60
  -4  11   0   35.60   10.50
  -4  11   0   52.29    9.40
   3 -11   0  392.56   29.10
   3 -11   0  432.86   28.80
   3 -11   0  419.76   26.70
   3 -11   0  437.06   26.70
   3 -11   0  443.66   27.30
   3 -11   0  407.36   31.40
   3 -11   0  410.76   32.70
   3 -11   0  455.35   27.70
   3 -11   0  381.86   27.60
  -3  11   0  502.55   27.00
  -3  11   0  442.36   28.90
  -3  11   0  443.66   31.10
  -3  11   0  438.56   27.90
  -3  11   0  431.76   27.30
  -3  11   0  439.96   29.20
   2 -11   0    6.80    7.60
   2 -11   0   -1.80    7.90
   2 -11   0    1.00    6.20
   2 -11   0    7.60    7.20
   2 -11   0   -0.60    6.00
   2 -11   0   10.40    4.80
   2 -11   0    8.50    5.50
   2 -11   0    9.90    4.40
  -2  11   0    9.70    8.10
  -2  11   0   -1.50    6.30
  -2  11   0    1.90    5.60
  -2  11   0   -2.70    6.40
  -2  11   0    5.60    4.60
  -2  11   0    8.00    4.50
   1 -11   0   14.90    6.10
   1 -11   0   11.30    8.60
   1 -11   0   17.80    7.80
   1 -11   0   17.30    9.10
   1 -11   0    8.20    7.60
   1 -11   0    9.10    6.20
   1 -11   0   19.30    8.40
  -1  11   0   19.20    7.10
  -1  11   0   11.70    7.60
  -1  11   0   18.80    7.50
  -1  11   0    9.00    8.50
  -1  11   0   15.10    4.70
   0 -11   0  416.96   28.80
   0 -11   0  469.25   30.50
   0 -11   0  444.86   27.90
   0 -11   0  443.26   32.00
   0 -11   0  429.96   30.20
   0  11   0  421.26   30.00
   0  11   0  483.75   34.10
   0  11   0  456.85   26.40
   0  11   0  457.75   29.30
   0  11   0  425.16   30.50
  -1 -11   0   -0.10    8.90
  -1 -11   0   -2.60    4.70
  -1 -11   0   -3.90    6.60
  -1 -11   0    6.50    6.80
  -1 -11   0    4.20    7.00
   1  11   0    0.20    2.90
   1  11   0   -2.30    9.30
   1  11   0   -3.00    6.70
   1  11   0    3.40    7.60
   1  11   0   -3.20    3.50
  -2 -11   0   15.40    7.90
  -2 -11   0    1.60    5.50
  -2 -11   0   -4.10    7.00
  -2 -11   0   14.10    9.40
  -2 -11   0    6.50    6.40
  -2 -11   0    7.60    7.80
   2  11   0    8.70    8.00
   2  11   0   -1.90    7.60
   2  11   0   12.70    7.30
   2  11   0    6.90   10.10
  -3 -11   0   20.30    8.20
  -3 -11   0   18.70   11.30
  -3 -11   0   27.50    7.70
  -3 -11   0   21.20    8.40
   3  11   0   18.90    9.00
   3  11   0   33.70   10.00
   3  11   0   44.60   13.90
   3  11   0   27.90    8.60
  -4 -11   0    2.00    9.30
  -4 -11   0    2.10    8.40
  -4 -11   0    0.60    6.00
  -4 -11   0   -6.40    7.40
   4  11   0    3.00    7.50
   4  11   0    9.60    6.70
   4  11   0    2.90    4.30
   4  11   0    8.20   10.80
   4  11   0    1.60    8.20
  -5 -11   0    5.00    5.90
  -5 -11   0   11.60    8.80
  -5 -11   0    9.60    9.10
  -5 -11   0   -1.80    9.10
  -5 -11   0    2.40    7.20
  -5 -11   0    4.30    8.20
  -5 -11   0    5.40    8.70
   5  11   0   15.40    6.20
   5  11   0    5.20    4.30
   5  11   0    4.30   11.40
   5  11   0   16.30    8.60
   5  11   0   14.60    9.20
   5  11   0   11.40    8.60
  -6 -11   0   30.60   11.80
  -6 -11   0   54.19   11.30
  -6 -11   0   52.19   14.90
  -6 -11   0   90.19   15.90
  -6 -11   0   48.70   17.80
   6  11   0   58.89    7.30
   6  11   0   76.39   13.90
   6  11   0   57.49   11.00
   6  11   0   71.99   13.30
   6  11   0   62.59   13.40
  -7 -11   0    7.10   10.40
  -7 -11   0   -3.30    8.30
  -7 -11   0   18.40    9.20
   7  11   0   21.20    7.70
   7  11   0    8.00   10.60
   7  11   0   -2.00    3.80
   7  11   0   17.30    9.50
   7  11   0   24.00   10.30
  -8 -11   0    1.00    8.80
  -8 -11   0    0.40    9.10
  -8 -11   0   22.80   14.00
   8  11   0   -2.40    3.90
   8  11   0   36.30   12.90
   8  11   0    9.50   10.00
   8  11   0   13.70    8.30
   8  11   0   14.40    7.30
  -9 -11   0   44.70   15.20
  -9 -11   0   20.80   12.00
  -9 -11   0    8.70    9.90
  -9 -11   0   45.60   10.80
   9  11   0   -4.40    7.70
   9  11   0   44.10   15.70
   9  11   0   -1.90    4.50
   9  11   0   17.60   11.60
  10  11   0   64.49   13.30
 -12  12   0    1.90    6.50
 -12  12   0    5.00    4.20
 -12  12   0   17.70    9.90
 -11  12   0   35.00    5.90
 -11  12   0   35.10   11.70
 -11  12   0   43.80    6.80
 -11  12   0   36.70    8.70
  10 -12   0    0.80   14.20
  10 -12   0   26.00   15.60
  10 -12   0   33.00   16.40
  10 -12   0   33.00   15.30
 -10  12   0   13.90    9.60
 -10  12   0   12.60    5.90
 -10  12   0   27.50    5.30
 -10  12   0   14.90    6.50
   9 -12   0    8.60   13.50
   9 -12   0    0.90   12.60
   9 -12   0   18.30   13.20
   9 -12   0   21.00   14.80
  -9  12   0    0.80    7.90
  -9  12   0    7.70    5.60
  -9  12   0   11.70    5.60
  -9  12   0   10.10    8.10
  -9  12   0    6.50    4.70
   8 -12   0   10.40   12.00
   8 -12   0   18.00   14.40
   8 -12   0   26.30   13.20
   8 -12   0   47.20   15.50
   8 -12   0   27.50   12.90
  -8  12   0    9.80   10.90
  -8  12   0   12.20    6.00
  -8  12   0   25.10    5.90
  -8  12   0   28.40    7.40
  -8  12   0   29.70    8.80
  -8  12   0   19.20    6.30
  -8  12   0   40.60   10.40
   7 -12   0   48.70   16.60
   7 -12   0   28.90   14.00
   7 -12   0   33.30   11.70
   7 -12   0   32.00   13.20
   7 -12   0   67.19   15.50
  -7  12   0   26.50    9.00
  -7  12   0   17.40    6.50
  -7  12   0   33.40    7.40
  -7  12   0   31.50    6.90
  -7  12   0   23.10    8.40
  -7  12   0   35.20    6.80
  -7  12   0   35.70    8.80
   6 -12   0  199.98   18.20
   6 -12   0  199.88   20.80
   6 -12   0  184.08   22.00
   6 -12   0  222.48   25.90
   6 -12   0  169.08   23.10
   6 -12   0  173.88   15.00
   6 -12   0  166.18   23.80
  -6  12   0  212.08   15.60
  -6  12   0  175.48   16.10
  -6  12   0  189.38   16.90
  -6  12   0  201.58   18.60
  -6  12   0  161.28   15.80
  -6  12   0  191.08   14.80
   5 -12   0   57.09   10.80
   5 -12   0   81.79   15.10
   5 -12   0   55.99   14.30
   5 -12   0   75.69   11.30
   5 -12   0   64.99   12.50
   5 -12   0  107.09   20.20
   5 -12   0   67.49   10.30
   5 -12   0   50.99   14.10
  -5  12   0   64.39   10.70
  -5  12   0   66.99    9.70
  -5  12   0   63.79   10.50
  -5  12   0   58.99    9.70
  -5  12   0   70.39   13.00
  -5  12   0   65.29    8.30
   4 -12   0   29.40   13.20
   4 -12   0   32.40    6.70
   4 -12   0   34.60    8.20
   4 -12   0   27.00    7.80
   4 -12   0   33.00   11.10
   4 -12   0   25.70   11.30
   4 -12   0   26.60    6.30
   4 -12   0   42.90    9.70
   4 -12   0   18.30    9.60
   4 -12   0   19.00    8.00
  -4  12   0   31.20    8.20
  -4  12   0   38.40    9.50
  -4  12   0   30.00    6.70
  -4  12   0   29.20   11.30
  -4  12   0   50.79    8.30
  -4  12   0   20.90    8.60
   3 -12   0   40.50    7.30
   3 -12   0   35.10   11.70
   3 -12   0   50.09    9.10
   3 -12   0   67.29   10.50
   3 -12   0   40.20    8.80
   3 -12   0   38.50   10.10
   3 -12   0   50.29    8.10
   3 -12   0   49.20   13.90
  -3  12   0   49.50   12.90
  -3  12   0   48.00    9.90
  -3  12   0   56.29   11.00
  -3  12   0   46.40    9.40
  -3  12   0   53.79    8.30
  -3  12   0   56.49    7.60
   2 -12   0    1.40    5.40
   2 -12   0    6.50   11.10
   2 -12   0   -2.30    9.20
   2 -12   0    1.40    7.30
   2 -12   0    2.00    4.10
   2 -12   0    5.30    8.10
   2 -12   0    6.00    6.60
   2 -12   0    0.70    4.40
  -2  12   0    1.80    7.40
  -2  12   0   11.20    5.00
  -2  12   0   -1.30    8.40
  -2  12   0   -3.30    6.30
  -2  12   0   -3.50    5.60
   1 -12   0   11.50    6.50
   1 -12   0   12.00    8.60
   1 -12   0    4.00    9.10
   1 -12   0   13.70    8.00
   1 -12   0   13.50    9.10
   1 -12   0    8.50    7.50
   1 -12   0   14.70    4.10
   1 -12   0    7.80    5.30
  -1  12   0   12.60    7.10
  -1  12   0   15.50    7.90
  -1  12   0   16.60    5.10
  -1  12   0    4.70    7.50
  -1  12   0   19.30   10.00
   0 -12   0   19.60   10.20
   0 -12   0   17.90   10.00
   0 -12   0    5.40    6.20
   0 -12   0   24.10    6.70
   0 -12   0   17.00    9.00
   0 -12   0   20.20    8.60
   0  12   0   32.30   12.00
   0  12   0   15.80    8.90
   0  12   0   21.60    8.60
   0  12   0   23.30    5.10
  -1 -12   0   -2.00    8.90
  -1 -12   0    7.20    6.80
  -1 -12   0    8.50    8.70
  -1 -12   0    6.60    7.90
  -1 -12   0    6.90    5.80
   1  12   0    7.10    8.70
   1  12   0   -2.90    2.00
   1  12   0    3.30   10.30
   1  12   0   -0.60    8.10
   1  12   0    4.80    3.60
  -2 -12   0  346.17   29.60
  -2 -12   0  437.46   27.60
  -2 -12   0  452.45   30.10
  -2 -12   0  403.36   27.70
  -2 -12   0  460.35   31.50
  -2 -12   0  437.66   33.20
   2  12   0  367.26   28.40
   2  12   0  441.56   34.70
   2  12   0  411.46   24.20
   2  12   0  429.16   30.50
   2  12   0  416.46   31.40
  -3 -12   0   26.10   10.40
  -3 -12   0   26.90    9.50
  -3 -12   0   39.60   13.20
  -3 -12   0   54.39   10.10
   3  12   0   29.50   10.90
   3  12   0   21.40   12.70
   3  12   0   37.90    4.40
   3  12   0   38.60   10.70
  -4 -12   0  120.29   16.10
  -4 -12   0  145.89   16.90
  -4 -12   0  155.78   17.80
  -4 -12   0   95.69   18.00
  -4 -12   0  106.59   13.60
   4  12   0  171.18   23.50
   4  12   0  126.29   16.70
   4  12   0   99.89   16.60
   4  12   0  107.69   11.50
   4  12   0  128.39    7.80
  -5 -12   0   70.19   17.30
  -5 -12   0   44.20   12.10
  -5 -12   0   91.89   15.10
  -5 -12   0   86.99   14.50
   5  12   0   70.09   12.60
   5  12   0   73.49   18.80
   5  12   0   91.79   15.00
   5  12   0   65.99   15.70
   5  12   0   70.09    9.00
  -6 -12   0   21.90   11.00
  -6 -12   0   40.40   15.20
  -6 -12   0   40.60   12.80
  -6 -12   0   25.50   11.10
   6  12   0   24.40   10.70
   6  12   0   22.80   10.20
   6  12   0   28.60    5.60
  -7 -12   0   70.59   20.60
  -7 -12   0   20.90   12.00
  -7 -12   0   45.70   13.10
  -7 -12   0   59.19   16.00
   7  12   0   45.60   12.20
   7  12   0   52.59   13.00
   7  12   0   25.30   12.50
  -8 -12   0   30.90   11.70
  -8 -12   0   36.10   15.40
   8  12   0   27.10    9.90
   8  12   0   27.80   12.10
   8  12   0   55.39   16.10
  -9 -12   0   20.30   11.40
   9  12   0    9.10   12.40
   9  12   0   12.40   13.80
   9  12   0   -0.50    8.30
 -12  13   0    2.40    8.80
 -12  13   0   -3.20    6.00
 -12  13   0    1.80    4.90
  11 -13   0   35.50   16.70
 -11  13   0   35.40   12.40
 -11  13   0   41.10    6.40
 -11  13   0   33.60    7.70
 -11  13   0   17.40    6.10
  10 -13   0   19.70   13.90
  10 -13   0    8.20   16.50
  10 -13   0   19.50   13.20
  10 -13   0   -8.70   12.70
 -10  13   0   12.70    4.70
 -10  13   0    7.90    4.00
 -10  13   0   13.80    6.00
 -10  13   0   27.50   11.60
 -10  13   0    8.10    3.70
 -10  13   0    2.10    6.00
   9 -13   0  -13.60   12.30
   9 -13   0    5.00   11.50
   9 -13   0   17.90   14.00
   9 -13   0   -5.70   11.70
  -9  13   0    3.60    5.50
  -9  13   0    4.30    5.20
  -9  13   0    1.10    5.50
  -9  13   0   -5.20    5.10
  -9  13   0   -2.10    8.20
  -9  13   0  -13.90    6.00
  -9  13   0    1.90    4.00
   8 -13   0  110.79   21.00
   8 -13   0   96.19   22.50
   8 -13   0  124.29   32.10
   8 -13   0   93.09   17.60
   8 -13   0  105.09   21.10
  -8  13   0  111.89   13.60
  -8  13   0  109.29   16.00
  -8  13   0  115.99   13.10
  -8  13   0  106.99   11.40
  -8  13   0  115.39   12.10
  -8  13   0  102.19   12.30
   7 -13   0   60.19   14.10
   7 -13   0   37.00   16.70
   7 -13   0   42.70    7.80
   7 -13   0   58.39   15.00
   7 -13   0   41.40   14.90
   7 -13   0   28.10   18.00
  -7  13   0   37.20    8.30
  -7  13   0   39.00    7.70
  -7  13   0   32.70    6.70
  -7  13   0   35.70    9.90
  -7  13   0   37.60   10.10
  -7  13   0   27.20    9.20
  -7  13   0   48.20   11.00
  -7  13   0   30.40    8.60
   6 -13   0  142.89   14.30
   6 -13   0  203.38   28.70
   6 -13   0  164.98   15.80
   6 -13   0  217.28   26.10
   6 -13   0  176.18   20.20
   6 -13   0  199.68   23.50
   6 -13   0  162.88   23.90
  -6  13   0  200.68   15.50
  -6  13   0  181.88   14.50
  -6  13   0  136.09   15.80
  -6  13   0  181.98   16.40
  -6  13   0  190.98   19.50
   5 -13   0   38.70   11.10
   5 -13   0   41.80    9.30
   5 -13   0   54.79   14.90
   5 -13   0   50.59    8.60
   5 -13   0   68.19   15.70
   5 -13   0   89.19   19.30
   5 -13   0   91.69   16.60
  -5  13   0   71.99   10.60
  -5  13   0   61.79   13.50
  -5  13   0   46.60   10.00
  -5  13   0   58.09   10.60
  -5  13   0   40.70    7.30
   4 -13   0   -1.10    8.90
   4 -13   0   -9.60    7.50
   4 -13   0    0.90    5.10
   4 -13   0   -1.80    5.40
   4 -13   0   -1.90    4.90
   4 -13   0    3.40    7.00
   4 -13   0    1.90   11.50
   4 -13   0   -1.40    4.90
  -4  13   0   -4.30    7.70
  -4  13   0   -4.20    5.70
  -4  13   0    6.10    7.20
  -4  13   0    3.40    4.90
  -4  13   0    1.00    4.50
  -4  13   0   -2.60    5.40
   3 -13   0   12.20    6.20
   3 -13   0    9.40    5.70
   3 -13   0   -1.20    9.70
   3 -13   0    3.90    6.30
   3 -13   0   13.30    8.70
   3 -13   0    8.00    7.20
   3 -13   0    9.80    9.40
   3 -13   0    7.50    4.80
  -3  13   0    3.00    6.20
  -3  13   0   12.50    8.10
  -3  13   0    1.70    8.50
  -3  13   0   11.30    6.50
  -3  13   0    1.90    4.70
  -3  13   0    5.10    5.00
   2 -13   0   56.29   11.00
   2 -13   0   35.50   11.20
   2 -13   0   45.40    5.90
   2 -13   0   24.70    8.00
   2 -13   0   31.90   11.60
   2 -13   0   40.60    7.90
   2 -13   0   26.70   11.90
   2 -13   0   44.10   10.90
  -2  13   0   39.80    9.90
  -2  13   0   20.90    8.40
  -2  13   0   27.10    9.60
  -2  13   0   46.10    7.30
  -2  13   0   34.70   12.50
   1 -13   0  138.29    9.60
   1 -13   0  117.49   17.50
   1 -13   0  120.29   16.00
   1 -13   0  130.09   19.10
   1 -13   0  142.19   16.40
   1 -13   0  128.79   17.50
   1 -13   0  119.29   14.50
   1 -13   0  120.29   12.80
  -1  13   0  154.08   16.60
  -1  13   0  148.49   20.60
  -1  13   0  119.49   16.40
  -1  13   0   89.59   14.50
   0 -13   0   42.50    8.10
   0 -13   0   47.50   11.30
   0 -13   0   32.80   10.50
   0 -13   0   37.90   12.10
   0 -13   0   27.50    8.60
   0 -13   0   31.00   11.10
   0  13   0   37.20   10.80
   0  13   0   40.10   13.30
   0  13   0   36.30   10.60
   0  13   0   31.60    6.00
  -1 -13   0   33.70    6.60
  -1 -13   0   40.90   12.60
  -1 -13   0   26.50   10.60
  -1 -13   0   29.60    8.80
  -1 -13   0   22.20    8.60
  -1 -13   0   36.10    7.90
   1  13   0   29.80   12.60
   1  13   0   26.00   10.60
   1  13   0   31.00    5.30
   1  13   0   34.70   11.10
  -2 -13   0  145.79   13.90
  -2 -13   0  142.99   17.50
  -2 -13   0  170.38   21.90
  -2 -13   0  151.08   16.60
   2  13   0  168.48   23.00
   2  13   0  135.49   17.90
   2  13   0  172.18   19.00
   2  13   0  133.99   10.40
  -3 -13   0    8.40    8.20
  -3 -13   0   17.20    7.20
  -3 -13   0    1.30    6.80
  -3 -13   0    7.60    9.00
  -3 -13   0   15.60   11.60
  -3 -13   0   12.50    8.80
   3  13   0   13.30    3.00
   3  13   0   14.90    8.80
   3  13   0   19.90    9.90
   3  13   0   17.20   10.50
   3  13   0    6.60   10.60
  -4 -13   0  260.37   24.70
  -4 -13   0  253.87   22.40
  -4 -13   0  286.57   24.30
  -4 -13   0  306.67   28.00
   4  13   0  285.57   26.10
   4  13   0  293.37   23.30
   4  13   0  266.27   29.00
   4  13   0  239.08   19.10
   4  13   0  266.37   23.80
  -5 -13   0   -0.70    8.10
  -5 -13   0   -4.50   10.00
  -5 -13   0   -6.00    8.50
  -5 -13   0  -12.70    7.90
   5  13   0   -0.80    8.70
   5  13   0    8.70   10.20
   5  13   0   -1.70    4.80
   5  13   0   15.10    7.90
  -6 -13   0   23.80    8.60
  -6 -13   0   23.90   13.20
  -6 -13   0   10.10    9.70
  -6 -13   0   10.40   10.40
   6  13   0   14.40   10.10
   6  13   0   10.20    4.40
   6  13   0   19.60    9.40
   6  13   0   11.90    9.80
  -7 -13   0   27.50   12.40
  -7 -13   0   43.10   15.40
  -7 -13   0   56.49   14.60
  -7 -13   0   49.20   15.50
   7  13   0   42.20   12.20
   7  13   0   44.90   13.30
  -8 -13   0   56.09   17.00
  -8 -13   0   57.49   15.70
  -8 -13   0   67.69   15.20
   8  13   0   66.39   11.80
   8  13   0   61.29   12.50
   8  13   0   58.59   15.60
   8  13   0   95.19   24.20
  11 -14   0   46.90   19.50
  11 -14   0   69.49   20.70
 -11  14   0   41.10    8.70
 -11  14   0   63.89   13.80
 -11  14   0   48.50    8.20
  10 -14   0   45.70   17.80
  10 -14   0   71.89   21.50
  10 -14   0   66.09   21.20
  10 -14   0   55.79   17.90
 -10  14   0   55.49    9.10
 -10  14   0   40.10   12.50
 -10  14   0   77.49   10.00
 -10  14   0   64.39    9.60
 -10  14   0   72.89    8.70
 -10  14   0   64.99    8.70
   9 -14   0    8.50   12.10
   9 -14   0  -16.40   12.90
   9 -14   0   -4.60   11.60
   9 -14   0    3.20   10.80
   9 -14   0    2.90   12.10
  -9  14   0    6.60    5.70
  -9  14   0   -7.50    4.60
  -9  14   0   -2.90    5.70
  -9  14   0  -13.10    4.70
  -9  14   0   -0.60    8.70
  -9  14   0    4.60    6.40
   8 -14   0    7.50   14.10
   8 -14   0   16.60   11.60
   8 -14   0   10.80   12.00
   8 -14   0   -4.00   11.60
  -8  14   0   17.20    7.80
  -8  14   0   -1.50    6.00
  -8  14   0    0.50    6.10
  -8  14   0    8.60    5.40
  -8  14   0    8.20    7.30
  -8  14   0   -0.10    4.90
   7 -14   0   -1.80    4.50
   7 -14   0    5.40   14.00
   7 -14   0   10.10   11.10
   7 -14   0    6.00    5.20
   7 -14   0   -6.20   10.80
   7 -14   0    2.80   12.10
   7 -14   0    1.50    8.80
  -7  14   0    3.10    5.00
  -7  14   0    6.80    6.90
  -7  14   0    0.40    6.40
  -7  14   0   -0.20    7.10
  -7  14   0    5.30    5.50
  -7  14   0    2.90    6.70
   6 -14   0   -2.70    8.60
   6 -14   0   19.70   16.60
   6 -14   0   -4.60    4.60
   6 -14   0    3.70    5.60
   6 -14   0   -1.60    9.40
   6 -14   0    5.80    6.20
   6 -14   0    5.80   10.50
  -6  14   0   -2.30    5.50
  -6  14   0   -7.50    5.80
  -6  14   0   -3.00    4.20
  -6  14   0    6.30    8.20
  -6  14   0  -12.10    9.90
  -6  14   0   -5.50    4.80
   5 -14   0    1.10    6.70
   5 -14   0    0.60   11.20
   5 -14   0    6.50    8.10
   5 -14   0   16.90    6.10
   5 -14   0   12.00   11.20
   5 -14   0   14.40   10.90
   5 -14   0   13.50   11.80
   5 -14   0    5.50    2.80
  -5  14   0   18.60    7.10
  -5  14   0    4.50    7.00
  -5  14   0    4.40    7.40
  -5  14   0    4.90    4.80
  -5  14   0    7.20    9.40
   4 -14   0  115.19   19.10
   4 -14   0  119.79   21.60
   4 -14   0  109.79   14.90
   4 -14   0  132.59   19.70
   4 -14   0  135.59   13.00
   4 -14   0  121.59   12.60
   4 -14   0  125.89   13.70
  -4  14   0  120.19   12.50
  -4  14   0  148.09   16.50
  -4  14   0  139.09   13.00
  -4  14   0  126.59   15.50
  -4  14   0  153.98   18.70
  -4  14   0  136.29   14.20
   3 -14   0    0.00    4.00
   3 -14   0  -11.80    9.50
   3 -14   0    6.00    5.90
   3 -14   0   -7.90    6.20
   3 -14   0   13.80    9.80
   3 -14   0   11.30    7.20
   3 -14   0    3.40    8.60
   3 -14   0    9.00    7.30
   3 -14   0    7.40    5.40
  -3  14   0   11.00   10.40
  -3  14   0    6.00    7.70
  -3  14   0    3.60    6.30
  -3  14   0   11.70    5.80
  -3  14   0    8.70    8.30
   2 -14   0   36.00   11.60
   2 -14   0   34.80   11.50
   2 -14   0   36.70   10.40
   2 -14   0   42.20    4.70
   2 -14   0   36.60    9.10
   2 -14   0   37.70    8.00
   2 -14   0   40.60   13.30
  -2  14   0   28.80   10.20
  -2  14   0   41.00   13.30
  -2  14   0   33.90    9.70
  -2  14   0   49.90   12.00
  -2  14   0   39.40    7.20
   1 -14   0   39.70    8.70
   1 -14   0   50.09    4.50
   1 -14   0   64.69   12.30
   1 -14   0   47.40   11.30
   1 -14   0   45.80   12.40
   1 -14   0   59.89   11.10
   1 -14   0   63.99   13.30
   1 -14   0   52.59   14.00
  -1  14   0   38.10   11.70
  -1  14   0   49.00    7.50
  -1  14   0   60.89   15.00
  -1  14   0   49.99   11.40
  -1  14   0   58.59   17.30
   0 -14   0  163.98   18.20
   0 -14   0  143.19   16.70
   0 -14   0  140.59   20.50
   0 -14   0  142.19   14.30
   0 -14   0  169.58   11.30
   0 -14   0  161.08   18.20
   0 -14   0  177.28   20.60
   0  14   0  180.38   19.10
   0  14   0  180.28   19.20
   0  14   0  158.58   23.10
   0  14   0  151.58   12.60
  -1 -14   0  123.59   17.50
  -1 -14   0   82.29   13.50
  -1 -14   0  103.79   10.30
  -1 -14   0   90.39   17.10
   1  14   0  108.29   19.60
   1  14   0  127.29   17.50
   1  14   0  101.59    9.20
   1  14   0  125.39   18.20
  -2 -14   0   87.69   17.40
  -2 -14   0   91.39   11.10
  -2 -14   0   75.49   18.10
  -2 -14   0   92.49   15.80
  -2 -14   0   82.59   13.90
  -2 -14   0   92.69   15.80
   2  14   0  114.59   20.60
   2  14   0   91.59    7.90
   2  14   0   92.19   13.90
   2  14   0   88.29   16.50
   2  14   0   86.09   14.90
  -3 -14   0   22.40    8.00
  -3 -14   0   28.70   10.80
  -3 -14   0   12.70   12.50
  -3 -14   0   11.20    8.80
   3  14   0   17.60   10.40
   3  14   0   10.50   10.70
   3  14   0   19.90    3.30
  -4 -14   0   57.29   14.30
  -4 -14   0   67.89   13.90
  -4 -14   0   43.10   15.30
  -4 -14   0   52.79   11.60
   4  14   0   71.59   27.80
   4  14   0   45.50   13.00
   4  14   0   46.30    8.60
   4  14   0   68.69   15.10
  -5 -14   0    1.20    9.30
  -5 -14   0   -0.40    8.80
  -5 -14   0    6.00   12.00
  -5 -14   0   13.40   10.50
   5  14   0   17.80    9.40
   5  14   0    0.10    9.60
   5  14   0   13.70   10.60
   5  14   0    5.70    5.60
  -6 -14   0   74.59   18.20
  -6 -14   0   61.89   14.90
  -6 -14   0   50.19   14.90
   6  14   0   47.40   12.70
   6  14   0   60.79   14.00
  -7 -14   0   47.50   16.50
  -7 -14   0   41.20   13.70
  -7 -14   0   32.30   13.10
  -7 -14   0   39.10   15.20
   7  14   0   53.79   14.50
   7  14   0   38.10   12.50
  -8 -14   0   -0.60   10.90
  -8 -14   0   11.50   23.40
   8  14   0   -9.60   15.60
   8  14   0    8.60    9.70
   8  14   0   -3.60   11.00
   8  14   0   -8.80    9.00
  11 -15   0   11.80   18.00
  11 -15   0   28.70   17.30
  11 -15   0   44.20   19.50
  11 -15   0   11.30   14.50
 -11  15   0    5.90    6.30
 -11  15   0   31.40    8.10
 -11  15   0   21.00   11.50
  10 -15   0   62.89   20.00
  10 -15   0   99.59   25.10
  10 -15   0   56.59   21.30
  10 -15   0  102.09   22.70
 -10  15   0   81.19   16.00
 -10  15   0  102.49   11.30
 -10  15   0   81.49   10.30
 -10  15   0   82.79   11.40
 -10  15   0   90.29   11.10
   9 -15   0   19.00   15.90
   9 -15   0   13.30   17.10
   9 -15   0   26.60   15.60
   9 -15   0   10.40   13.60
   9 -15   0   18.60   13.00
  -9  15   0   12.20    6.60
  -9  15   0   23.10    7.70
  -9  15   0    8.10   10.50
  -9  15   0    4.80    6.80
  -9  15   0    7.30    7.30
   8 -15   0    3.40   14.00
   8 -15   0   27.80   12.80
   8 -15   0   -1.90   12.50
   8 -15   0   -4.90    9.60
   8 -15   0   -0.30   12.20
  -8  15   0   -6.90    7.70
  -8  15   0   -2.00    6.60
  -8  15   0   -2.60    5.00
  -8  15   0    3.20    7.30
  -8  15   0   20.70    8.00
  -8  15   0    6.80    7.00
   7 -15   0  123.39   24.40
   7 -15   0  112.79   22.20
   7 -15   0   80.69   16.10
   7 -15   0  120.29   22.10
   7 -15   0   98.89   12.80
   7 -15   0   86.39   18.90
  -7  15   0  110.09   14.70
  -7  15   0  102.89   16.20
  -7  15   0  113.79   14.60
  -7  15   0   86.09   13.40
  -7  15   0   96.49   11.30
   6 -15   0   44.30   14.10
   6 -15   0   40.20   17.00
   6 -15   0   45.00    9.70
   6 -15   0   42.10    8.10
   6 -15   0   40.90   15.70
   6 -15   0   58.89   24.90
   6 -15   0   44.20   12.80
  -6  15   0   26.50    9.60
  -6  15   0   45.60   12.20
  -6  15   0   28.90    9.40
  -6  15   0   43.50    7.70
   5 -15   0    6.60    5.80
   5 -15   0    7.70    9.60
   5 -15   0    2.00    3.40
   5 -15   0    8.80   13.50
   5 -15   0   -1.80   10.20
   5 -15   0    4.10    8.10
   5 -15   0   -3.00    6.20
   5 -15   0    5.70    3.20
  -5  15   0    2.50    5.00
  -5  15   0    0.80    5.90
  -5  15   0    3.80    8.30
  -5  15   0    9.50    7.90
  -5  15   0    3.70    7.20
  -5  15   0    5.80    7.70
   4 -15   0   33.20   10.40
   4 -15   0   16.80    7.10
   4 -15   0   26.00    7.70
   4 -15   0   25.20   12.80
   4 -15   0   22.10   14.10
   4 -15   0   35.90    9.90
   4 -15   0   68.49   16.20
   4 -15   0   39.20    7.80
  -4  15   0   31.70   10.30
  -4  15   0   10.10   10.80
  -4  15   0   43.00    9.50
  -4  15   0   30.50   14.50
   3 -15   0   17.00    6.60
   3 -15   0   16.50    8.00
   3 -15   0   24.40    9.10
   3 -15   0   11.20    8.20
   3 -15   0   24.30    9.10
   3 -15   0   26.10   12.60
   3 -15   0   16.50   13.20
   3 -15   0   18.00    7.20
  -3  15   0   13.20    8.50
  -3  15   0   25.40    6.80
  -3  15   0   17.80    9.30
  -3  15   0   15.90    8.50
  -3  15   0   21.80   11.20
   2 -15   0   18.00    8.10
   2 -15   0    8.10    9.40
   2 -15   0    2.70   11.10
   2 -15   0   15.10    8.70
   2 -15   0   11.10    6.50
   2 -15   0   22.50    9.20
   2 -15   0   17.00   11.00
  -2  15   0   11.50    8.60
  -2  15   0   12.30    5.60
  -2  15   0   27.80   12.00
  -2  15   0   29.40    8.70
  -2  15   0    8.20    9.00
   1 -15   0    0.60    3.20
   1 -15   0    4.70    9.60
   1 -15   0    8.70    6.30
   1 -15   0    3.80   10.50
   1 -15   0   23.20   10.20
   1 -15   0    7.60    7.40
   1 -15   0    4.60    7.80
  -1  15   0   15.00    8.70
  -1  15   0    9.00    6.80
  -1  15   0    4.60    9.40
  -1  15   0    4.60   10.60
  -1  15   0   10.80    4.60
   0 -15   0   77.09   14.30
   0 -15   0   55.09   12.90
   0 -15   0   77.39   16.00
   0 -15   0   58.39   12.40
   0 -15   0   77.19   16.60
   0  15   0  101.59   16.20
   0  15   0   76.19   17.50
   0  15   0   70.79   15.70
   0  15   0   72.69    8.30
  -1 -15   0   15.40   10.30
  -1 -15   0   10.30   11.20
  -1 -15   0    5.50    9.80
  -1 -15   0    7.80    4.30
  -1 -15   0    4.90    7.50
  -1 -15   0   11.70    9.60
  -1 -15   0   -4.50    7.20
  -1 -15   0   -3.80    5.50
   1  15   0    9.30   10.50
   1  15   0    5.60    3.60
   1  15   0    1.70    8.90
   1  15   0    6.10   10.80
  -2 -15   0   46.90   15.60
  -2 -15   0   38.80    7.80
  -2 -15   0   42.40   11.80
  -2 -15   0   67.69   16.20
   2  15   0   35.10   12.80
   2  15   0   38.90    5.50
   2  15   0   52.69   16.50
   2  15   0   29.90   11.60
  -3 -15   0   77.69   18.10
  -3 -15   0   79.89   15.20
  -3 -15   0   77.29   18.30
  -3 -15   0   91.49   12.10
   3  15   0   80.09   15.70
   3  15   0   70.29   16.50
   3  15   0   90.89   20.00
  -4 -15   0   42.20   18.90
  -4 -15   0   63.79   16.30
  -4 -15   0   47.40   10.40
  -4 -15   0   33.90   12.30
   4  15   0   40.30   15.00
   4  15   0   37.80    8.80
   4  15   0   60.39   14.50
  -5 -15   0  114.49   22.20
  -5 -15   0  164.28   23.20
  -5 -15   0  183.78   20.10
  -5 -15   0  131.79   20.00
   5  15   0  157.38   20.10
   5  15   0  179.68   22.20
   5  15   0  129.59   14.80
  -6 -15   0  -17.60    9.00
  -6 -15   0    7.90   14.00
  -6 -15   0   12.20   11.00
  -6 -15   0  -17.90   12.30
   6  15   0   -6.90    5.70
   6  15   0    3.50   10.30
   6  15   0    9.00   11.40
   6  15   0   -1.60    2.90
   6  15   0   -6.30    3.90
  -7 -15   0   24.40   16.40
  -7 -15   0   11.80   11.30
   7  15   0   14.50   10.80
   7  15   0    5.90   10.80
   7  15   0  -19.50    7.50
  10 -16   0   29.00   18.10
  10 -16   0    5.60   13.10
  10 -16   0   26.10   16.50
  10 -16   0   41.50   20.70
 -10  16   0    1.30    6.00
 -10  16   0   35.40    8.30
 -10  16   0   18.10    8.30
 -10  16   0   11.80   10.50
 -10  16   0   22.30    7.50
   9 -16   0    4.50   13.90
   9 -16   0   -1.60   12.10
   9 -16   0    1.00   14.60
   9 -16   0   19.00   14.60
  -9  16   0    0.90   10.30
  -9  16   0   -4.50    4.90
  -9  16   0   -3.80    6.80
  -9  16   0   -7.50    6.50
  -9  16   0    9.30    8.20
  -9  16   0   18.30    8.10
   8 -16   0   21.70   14.90
   8 -16   0    7.80   16.50
   8 -16   0   14.60   12.90
   8 -16   0   -2.70   10.30
   8 -16   0   -3.40   10.90
  -8  16   0   -2.40    5.30
  -8  16   0    4.60    8.00
  -8  16   0   -8.30    6.20
  -8  16   0   -0.50    9.70
  -8  16   0  -13.90    6.20
  -8  16   0   12.60    8.10
   7 -16   0   11.50   12.40
   7 -16   0   11.70   12.80
   7 -16   0    4.70    9.60
   7 -16   0    3.20   13.40
   7 -16   0   21.90   12.40
   7 -16   0   18.80    7.60
  -7  16   0   15.60   10.30
  -7  16   0    3.50    5.60
  -7  16   0   10.30    7.10
  -7  16   0   15.80    9.10
  -7  16   0    1.50    7.40
  -7  16   0   22.90    8.60
   6 -16   0    3.80    7.60
   6 -16   0    6.30   11.70
   6 -16   0    6.20   12.10
   6 -16   0    0.40   17.30
   6 -16   0   -1.50    5.50
   6 -16   0   -0.90    3.70
   6 -16   0    7.40   14.70
  -6  16   0   10.50    6.10
  -6  16   0   -1.60    9.20
  -6  16   0   -3.50    7.60
  -6  16   0   -3.20    6.60
  -6  16   0    2.70    7.80
   5 -16   0    6.10    8.30
   5 -16   0   -3.20    3.30
   5 -16   0   -6.80    9.50
   5 -16   0    3.00    1.80
   5 -16   0    7.90   11.30
   5 -16   0    2.10   14.00
   5 -16   0   -0.50    5.50
   5 -16   0    1.70    1.80
   5 -16   0  -10.00    9.80
  -5  16   0   -4.60    6.50
  -5  16   0    0.90    5.70
  -5  16   0    8.70    9.70
  -5  16   0    1.90    7.60
  -5  16   0   17.20    9.10
   4 -16   0    6.70    6.50
   4 -16   0    2.60   12.10
   4 -16   0   -1.30    7.00
   4 -16   0   -0.60    5.70
   4 -16   0   16.50   12.50
   4 -16   0    8.50    8.80
   4 -16   0    0.80   10.60
   4 -16   0   -2.00    3.80
  -4  16   0    5.90    9.70
  -4  16   0    3.40    8.00
  -4  16   0    1.30    8.80
   3 -16   0   59.69   15.50
   3 -16   0   68.79   12.00
   3 -16   0   82.09   12.90
   3 -16   0   64.29   18.30
   3 -16   0   61.19   10.60
  -3  16   0   76.19   14.20
  -3  16   0   86.19   18.10
  -3  16   0   74.89   13.80
   2 -16   0  178.28   18.10
   2 -16   0  216.58   23.60
   2 -16   0  212.38   20.30
   2 -16   0  182.28   21.10
   2 -16   0  200.78   33.90
  -2  16   0  177.78   25.30
  -2  16   0  193.98   16.20
   1 -16   0   -0.50    9.40
   1 -16   0   -1.20    7.70
   1 -16   0   -2.10   10.40
   1 -16   0   12.40    8.50
  -1  16   0   11.20   10.50
  -1  16   0    1.40    8.80
  -1  16   0   16.10   11.90
  -1  16   0    1.50    4.20
   0 -16   0    2.20    6.50
   0 -16   0   -1.30   10.00
   0 -16   0    7.70    8.50
   0 -16   0    6.60   10.00
   0 -16   0   -8.50   10.00
   0  16   0   -6.50    9.10
   0  16   0    0.00    3.70
   0  16   0   19.00   12.70
   0  16   0   12.90   10.90
  -1 -16   0  -10.00    7.10
  -1 -16   0    2.70   10.70
  -1 -16   0   -7.90    7.20
  -1 -16   0   19.00   11.90
  -1 -16   0    6.60    9.60
   1  16   0  -19.50    7.50
   1  16   0   -1.70    3.30
   1  16   0    3.20   10.40
   1  16   0    8.40   11.70
  -2 -16   0    5.20   12.60
  -2 -16   0    5.00    8.30
  -2 -16   0    0.30    9.60
  -2 -16   0   -1.50    2.40
  -2 -16   0   -7.80    9.60
   2  16   0   -0.30    2.40
   2  16   0  -10.10   11.70
   2  16   0    3.50   10.10
   2  16   0    1.30   10.10
  -3 -16   0    1.20    9.20
  -3 -16   0   23.20   13.70
  -3 -16   0   10.00    3.70
  -3 -16   0   -0.10   10.00
   3  16   0    5.70   10.70
   3  16   0   -1.30    9.20
   3  16   0   -2.00    0.90
  -4 -16   0   48.50   14.90
  -4 -16   0   94.69   15.80
  -4 -16   0   64.49   18.30
   4  16   0   66.79   14.20
   4  16   0   77.69   16.30
   4  16   0   60.09   16.50
  -5 -16   0   12.10   12.70
  -5 -16   0   -1.10    7.80
  -5 -16   0    9.90   10.80
  -5 -16   0    1.70   12.70
   5  16   0    4.00    8.80
   5  16   0    9.90   10.90
   5  16   0   -5.80    7.30
  -6 -16   0    8.00   15.50
  -6 -16   0   68.79   21.10
  -6 -16   0   10.70   11.90
   6  16   0   -9.90    6.20
   6  16   0   -4.60   10.90
   6  16   0   16.30   11.00
   9 -17   0   21.80   16.40
   9 -17   0   21.40   14.40
  -9  17   0    4.40    5.70
  -9  17   0   15.40   14.10
  -9  17   0   41.70   10.50
  -9  17   0   18.20    8.60
  -9  17   0   19.20   13.00
   8 -17   0   56.99   17.60
   8 -17   0   53.49   13.60
   8 -17   0   29.30   16.60
   8 -17   0   44.60   16.40
   8 -17   0   35.70   19.20
  -8  17   0   37.30   13.30
  -8  17   0   14.70    9.20
  -8  17   0   33.50   11.10
  -8  17   0   30.70    7.50
   7 -17   0   11.20   14.00
   7 -17   0   11.20   14.10
   7 -17   0   -3.30    9.00
   7 -17   0   -0.90    6.00
   7 -17   0   18.80   15.20
   7 -17   0    3.10   11.20
  -7  17   0    6.70    6.00
  -7  17   0    3.80    8.90
  -7  17   0   10.90    8.40
   6 -17   0   11.70   14.40
   6 -17   0   29.60   17.80
   6 -17   0   28.80   11.20
   6 -17   0   17.30   12.50
   6 -17   0   -2.80    4.50
   6 -17   0   -1.40    6.00
   6 -17   0   -1.90   12.10
  -6  17   0   23.60   10.80
  -6  17   0    4.80    8.40
   5 -17   0   19.30   16.50
   5 -17   0    8.60    8.10
   5 -17   0   24.80   15.30
   5 -17   0    0.30    2.10
   5 -17   0    2.60    4.20
   5 -17   0    3.70   11.30
   5 -17   0    7.90    2.10
   5 -17   0   -0.50   10.70
  -5  17   0    6.80    8.40
  -5  17   0    2.50    7.70
  -5  17   0    2.30   11.10
   4 -17   0  102.89   21.40
   4 -17   0   81.99   20.10
   4 -17   0   44.50   15.20
   4 -17   0   78.99   11.20
   4 -17   0   80.59   11.10
   4 -17   0   62.69   12.10
  -4  17   0   88.29   15.40
  -4  17   0   59.39   10.20
  -4  17   0   77.19   15.30
  -4  17   0   87.49   18.40
   3 -17   0  143.29   16.50
   3 -17   0  196.48   18.00
   3 -17   0  157.18   23.40
   3 -17   0  131.29   24.00
  -3  17   0  126.59   19.70
  -3  17   0  176.48   20.30
  -3  17   0  151.78   23.30
   2 -17   0  147.09   23.60
   2 -17   0  166.48   17.90
  -2  17   0  177.58   29.90
  -2  17   0  175.78   21.90
  -2  17   0  143.99   20.40
   1 -17   0  258.37   23.90
   1 -17   0  226.08   26.50
   1 -17   0  226.38   24.10
   1 -17   0  230.58   20.90
   1 -17   0  220.08   23.80
  -1  17   0  207.58   23.70
  -1  17   0  222.58   17.60
  -1  17   0  264.27   29.30
  -1  17   0  272.87   26.10
   0 -17   0   36.30   13.60
   0 -17   0    7.10    9.80
   0 -17   0   14.30   12.30
   0 -17   0    5.00    8.80
   0  17   0  -15.30   11.20
   0  17   0   10.80    4.80
   0  17   0   -3.50   10.50
   0  17   0    9.30    9.90
  -1 -17   0   42.10   12.10
  -1 -17   0   61.39   14.30
  -1 -17   0   43.30   14.60
  -1 -17   0   46.30   15.10
   1  17   0   21.50   12.40
  -2 -17   0   39.20   14.90
  -2 -17   0   24.00   11.20
  -2 -17   0    8.70    9.30
  -2 -17   0   13.40   13.20
   2  17   0   12.90   12.40
   2  17   0   18.80   11.80
  -3 -17   0   -2.50   10.30
  -3 -17   0   -1.60    4.30
  -3 -17   0  -10.20    7.60
  -3 -17   0    8.70   10.60
   3  17   0   -8.70    8.90
   3  17   0    3.80   10.30
  -4 -17   0   61.59   19.00
  -4 -17   0   47.90   13.50
   4  17   0   39.60   10.70
   4  17   0   43.40   15.30
   4  17   0   54.49   13.10
   4  17   0   67.19   16.60
  -5 -17   0  -11.80   11.00
  -5 -17   0   10.90   15.10
   5  17   0   -7.60    3.30
   5  17   0   -1.80   11.30
   5  17   0  -17.90    6.80
   5  17   0   -5.90    9.30
   9 -18   0   21.50   16.00
   9 -18   0   20.70   15.90
   9 -18   0   27.70   25.10
   9 -18   0   16.10   16.80
  -9  18   0   13.70    8.90
  -9  18   0   25.40   11.50
  -9  18   0   -4.60    5.00
  -9  18   0    6.90    9.40
  -9  18   0   11.10    8.70
   8 -18   0    1.00    5.90
   8 -18   0   10.00   14.40
   8 -18   0   15.60   15.60
  -8  18   0   23.00    9.90
  -8  18   0   19.50    9.00
   7 -18   0  -13.60   13.00
   7 -18   0   23.60   13.20
   7 -18   0    5.40   14.90
   7 -18   0    0.30    5.20
   7 -18   0    1.00   13.10
  -7  18   0    4.50    9.20
  -7  18   0    0.60   10.00
  -7  18   0   23.30   10.50
   6 -18   0   54.99   17.50
   6 -18   0   89.99   23.20
   6 -18   0   54.99   16.80
   6 -18   0   54.39   17.40
  -6  18   0   69.19   15.90
  -6  18   0   37.50   12.70
  -6  18   0   53.59   14.60
   5 -18   0   23.20   15.30
   5 -18   0   28.10   17.30
   5 -18   0   12.50   11.70
   5 -18   0   23.90   14.10
   5 -18   0   -3.90    4.20
  -5  18   0    1.70    9.50
  -5  18   0    4.50   10.40
  -5  18   0   13.60    9.50
   4 -18   0  187.18   29.40
   4 -18   0  138.49   20.20
   4 -18   0  210.78   17.50
   4 -18   0  199.98   17.80
   4 -18   0  162.58   26.60
   4 -18   0  153.08   25.60
  -4  18   0  205.58   22.30
  -4  18   0  167.88   20.40
  -4  18   0  207.98   24.30
   3 -18   0   45.90   10.20
   3 -18   0   64.39   11.80
   3 -18   0   61.99   11.80
   3 -18   0   55.69   18.60
   3 -18   0   70.29   17.50
  -3  18   0   56.89    9.70
  -3  18   0   44.70   14.20
  -3  18   0   81.49   19.20
  -3  18   0   52.49   14.80
   2 -18   0  127.39   21.80
   2 -18   0  110.69   23.50
   2 -18   0  117.69   22.90
   2 -18   0  184.58   19.80
  -2  18   0  110.29   19.00
  -2  18   0  108.09   18.80
  -2  18   0  116.99   20.90
   1 -18   0   17.20   13.30
   1 -18   0   38.20   11.60
   1 -18   0   29.50   13.10
  -1  18   0   48.40   16.10
  -1  18   0   44.50   14.30
  -1  18   0   27.20    7.10
  -1  18   0   18.40   12.30
   0 -18   0   14.30   11.00
   0 -18   0   14.70   10.30
   0 -18   0   -0.50   11.00
   0 -18   0    4.50    4.80
   0  18   0   17.10    5.30
   0  18   0   21.50   12.40
   0  18   0   14.20   15.70
   0  18   0    9.90   10.60
  -1 -18   0    5.80   11.90
  -1 -18   0   17.00   12.70
  -1 -18   0    9.50    9.90
   1  18   0   -5.10    9.80
   1  18   0    7.50   11.90
   1  18   0   12.70   15.30
  -2 -18   0    5.20   11.10
  -2 -18   0  -13.00   10.00
  -2 -18   0   -4.90   12.90
   2  18   0    7.20   11.90
   2  18   0   -1.50    2.00
   2  18   0   10.90   12.50
  -3 -18   0   17.40   11.20
  -3 -18   0   -2.10   10.60
  -3 -18   0   -3.60   11.10
  -3 -18   0    0.40   11.90
   3  18   0   10.90   12.10
   3  18   0   -6.20   11.10
  -4 -18   0    5.40   11.40
  -4 -18   0   -0.70   13.80
  -4 -18   0   18.80   11.80
   4  18   0  -12.10    7.60
   4  18   0    7.00    8.60
   7 -19   0   -5.00    5.90
   7 -19   0    4.70   12.80
   7 -19   0   -7.10    9.40
   7 -19   0   -4.20   13.30
   7 -19   0   37.60   19.50
  -7  19   0   28.00   12.90
  -7  19   0   13.70   10.60
  -7  19   0    9.90    9.70
   6 -19   0   44.50   18.10
   6 -19   0   20.80   15.10
   6 -19   0   24.40   14.80
   6 -19   0   38.60   17.60
   6 -19   0   -8.80    8.90
  -6  19   0   17.00   11.10
  -6  19   0    7.80   11.40
  -6  19   0   21.50   10.20
   5 -19   0   89.19   22.50
   5 -19   0  116.59   25.10
   5 -19   0   77.29   19.60
   5 -19   0   65.19   19.10
   5 -19   0   49.80   10.70
  -5  19   0   49.00   15.70
  -5  19   0   55.39   14.30
  -5  19   0   81.19   16.00
   4 -19   0    5.00    5.80
   4 -19   0   -3.70    4.40
   4 -19   0    2.60   14.60
   4 -19   0   16.50   13.80
   4 -19   0   -4.90   12.10
   4 -19   0   -0.90    3.50
  -4  19   0   -4.00    8.60
  -4  19   0   -8.20    9.70
  -4  19   0   17.70   14.70
   3 -19   0    4.40   10.70
   3 -19   0   -6.30    3.80
   3 -19   0   15.00   14.80
   3 -19   0   12.90    9.00
  -3  19   0    2.10   10.70
  -3  19   0   13.90   11.20
   2 -19   0   -3.70    4.40
   2 -19   0   13.20   14.00
   2 -19   0   24.60   10.00
   2 -19   0    5.70   11.50
  -2  19   0   43.70   16.20
  -2  19   0   11.40   10.70
  -2  19   0   11.30   11.40
   1 -19   0   29.30   15.90
   1 -19   0    3.00    9.80
   1 -19   0    8.00   11.90
   1 -19   0   -9.90    5.00
  -1  19   0   14.70   12.30
  -1  19   0    8.50   12.00
  -1  19   0   22.60   17.60
  -1  19   0    2.50    4.70
   0 -19   0   28.50   12.40
   0 -19   0   36.00   15.00
   0 -19   0   61.69   14.70
   0  19   0   54.79   15.80
   0  19   0   50.49   15.70
   0  19   0   46.50   19.10
  -1 -19   0   17.70   10.50
  -1 -19   0    9.60   10.10
  -1 -19   0    2.20   12.30
  -1 -19   0   -0.30    6.00
   1  19   0    0.60   10.80
   1  19   0   22.70   13.60
  -2 -19   0   46.90   13.30
  -2 -19   0   48.50   14.30
  -2 -19   0   51.29   16.30
  -2 -19   0   57.19   18.30
   2  19   0   38.20   15.30
   2  19   0   -2.20   18.70
  -3 -19   0   19.90   15.00
  -3 -19   0   -3.80   11.90
  -3 -19   0    4.00    9.20
  -3 -19   0   -3.20   11.00
   3  19   0   -9.60   10.50
   3  19   0   14.30   12.60
   6 -20   0   -3.70   14.40
   6 -20   0   28.80   16.10
   6 -20   0   -4.30    5.40
   6 -20   0   14.30   15.40
  -6  20   0   -5.50    9.20
  -6  20   0   12.30   10.90
   5 -20   0  -11.60   13.50
   5 -20   0   18.10    4.40
   5 -20   0    7.10   14.80
   5 -20   0   -8.80   14.40
   5 -20   0    0.40    6.00
   5 -20   0  -19.30   10.90
   5 -20   0    4.90    3.50
  -5  20   0    4.50   12.00
  -5  20   0    1.60    8.80
   4 -20   0   12.80    7.50
   4 -20   0   -4.70   13.70
   4 -20   0   26.70   13.80
   4 -20   0   34.70   16.00
   4 -20   0    0.30    4.00
   4 -20   0    5.40   15.80
   4 -20   0   -6.30    7.30
   4 -20   0   -3.30    4.90
  -4  20   0    9.80   12.10
  -4  20   0   21.80   20.30
   3 -20   0   16.30   16.60
   3 -20   0   36.20   10.30
   3 -20   0   -2.50    6.70
   3 -20   0   54.49   15.80
  -3  20   0   43.20   15.30
  -3  20   0   15.10   11.80
  -3  20   0   49.99   16.40
   2 -20   0  -11.80    7.50
   2 -20   0  -12.40    4.60
   2 -20   0   -5.00   10.10
   2 -20   0   12.00   15.10
  -2  20   0   -0.70   11.30
  -2  20   0   -0.60    6.80
  -2  20   0   -8.30   10.20
  -2  20   0   21.50   16.90
   1 -20   0   40.40   16.90
   1 -20   0   59.29   15.80
   1 -20   0    2.00    7.50
   1 -20   0   23.40   12.20
  -1  20   0   59.19   21.90
  -1  20   0   18.20   12.80
   0 -20   0   82.59   18.20
   0 -20   0   74.29   16.00
   0 -20   0   58.59   15.80
   0  20   0   57.29   16.10
   0  20   0   68.99   19.00
  -1 -20   0   31.80   13.20
  -1 -20   0   44.60   17.90
   1  20   0   31.40   16.20
   1  20   0   13.90   11.70
  -2  21  -1   -1.40   12.30
  -2  21  -1   12.00   12.50
   2 -21   1   40.90   26.00
   2 -21   1    3.20    8.40
   2 -21   1   15.90   10.50
   2 -21   1   29.70   12.40
  -3  21  -1   11.20   11.50
  -3  21  -1    0.00   11.10
   3 -21   1   -9.70    9.00
   3 -21   1  -14.60    5.40
   3 -21   1    6.30   11.40
   3 -21   1   25.40   19.20
   3 -21   1   -2.60    6.30
   1  20  -1   11.70   15.90
   1  20  -1   15.60   12.80
  -1 -20   1   48.20   13.50
  -1 -20   1   32.00   15.20
  -1 -20   1   -7.60    7.90
  -1 -20   1   32.20   14.90
   0  20  -1   10.40   14.30
   0  20  -1   17.90   13.30
   0  20  -1   -0.80    5.40
   0 -20   1    7.00   13.20
   0 -20   1    7.50    7.30
   0 -20   1   17.10   11.10
   0 -20   1   14.80   10.40
  -1  20  -1   17.80   11.70
  -1  20  -1  -18.40   13.00
   1 -20   1  -10.00   13.00
   1 -20   1  -15.90    7.50
   1 -20   1   -6.30   10.50
  -2  20  -1   18.30   11.80
  -2  20  -1   10.20   12.80
  -2  20  -1   18.10   16.90
   2 -20   1   -6.80   10.10
   2 -20   1   -3.60    5.60
   2 -20   1   -5.00   13.00
  -3  20  -1   50.49   15.80
  -3  20  -1   43.90   15.50
  -3  20  -1    8.40   13.00
   3 -20   1   78.79   17.00
   3 -20   1   14.10    8.90
   3 -20   1   51.79   16.80
   3 -20   1   35.30   18.90
  -4  20  -1    6.60   11.80
  -4  20  -1   -9.30   10.60
  -4  20  -1   26.60   17.40
   4 -20   1    8.30    4.40
   4 -20   1  -18.50   13.10
   4 -20   1   -3.90    5.80
   4 -20   1   22.80   14.30
   4 -20   1   -9.80   13.60
   4 -20   1  -12.70   12.20
   4 -20   1    3.90    5.30
  -5  20  -1  -11.30    8.70
  -5  20  -1    0.70   11.10
  -5  20  -1   -3.30   10.40
   5 -20   1    0.00   16.10
   5 -20   1   11.60    4.10
   5 -20   1   -8.90   13.30
   5 -20   1   -5.30    5.20
   5 -20   1   12.50   13.60
  -6  20  -1  -10.50   11.10
  -6  20  -1    2.40   10.00
  -6  20  -1    3.10   10.50
   6 -20   1   -1.40    5.90
   6 -20   1   12.20   14.60
   6 -20   1    9.80   13.90
   3  19  -1   -6.10    8.40
   3  19  -1   -9.90   11.70
   3  19  -1   -1.10    8.20
   3  19  -1   19.30   13.60
  -3 -19   1   10.60   10.20
  -3 -19   1   15.60   15.10
  -3 -19   1    4.60   11.80
  -3 -19   1    1.20   10.50
   2  19  -1  -15.00   10.20
  -2 -19   1   14.00   10.80
  -2 -19   1   12.50   15.70
  -2 -19   1    5.10   11.80
  -2 -19   1   11.20    9.50
   1  19  -1   11.10   13.40
   1  19  -1    0.90   11.30
  -1 -19   1   24.70   11.50
  -1 -19   1    0.50    7.60
  -1 -19   1   16.20   12.50
  -1 -19   1   23.80   12.00
   0  19  -1   37.60   19.20
   0  19  -1   36.80   15.00
   0  19  -1   23.00   13.50
   0  19  -1   21.50    7.00
   0 -19   1   -0.90    7.00
   0 -19   1   32.10   11.70
   0 -19   1   20.20   13.60
   0 -19   1   18.40   11.10
  -1  19  -1   -1.80    4.70
  -1  19  -1   -7.10   11.40
  -1  19  -1   20.60   12.80
  -1  19  -1   -4.10   13.50
   1 -19   1   -1.70    8.50
   1 -19   1   -7.50    5.10
   1 -19   1   22.20   14.40
   1 -19   1  -12.50   10.00
  -2  19  -1    4.50   11.50
  -2  19  -1   24.40   16.30
  -2  19  -1   -2.50   10.30
  -2  19  -1   -4.10    5.60
   2 -19   1   45.50   18.70
   2 -19   1    7.50   10.30
   2 -19   1   -7.10    5.90
   2 -19   1    8.80   13.50
  -3  19  -1    9.70   11.00
  -3  19  -1   31.20   17.20
  -3  19  -1   23.20   12.70
   3 -19   1   39.00   18.60
   3 -19   1   31.10   11.40
   3 -19   1   14.30    9.40
   3 -19   1   29.40   14.30
  -4  19  -1   44.30   14.20
  -4  19  -1   39.00   13.60
  -4  19  -1   58.29   17.20
   4 -19   1   40.00   16.90
   4 -19   1   26.50    9.40
   4 -19   1   26.30   15.90
   4 -19   1   23.40   17.60
   4 -19   1    7.90    5.70
  -5  19  -1   64.19   14.50
  -5  19  -1   68.59   15.50
  -5  19  -1   66.99   18.00
   5 -19   1   97.89   22.00
   5 -19   1   42.40   18.30
   5 -19   1   67.59   18.90
   5 -19   1   98.59   23.60
  -6  19  -1    3.40    8.50
  -6  19  -1   29.30   12.30
  -6  19  -1    4.70    9.90
   6 -19   1  -10.00   12.40
   6 -19   1   21.90   16.30
   6 -19   1   -2.10   12.40
   6 -19   1  -19.20   11.90
   6 -19   1   -7.50    4.90
  -7  19  -1   13.60   12.60
  -7  19  -1   12.80    9.80
  -7  19  -1   31.80   11.80
  -7  19  -1   10.90   10.40
   7 -19   1   11.40    6.00
   7 -19   1    2.90   14.60
   7 -19   1   10.60   15.20
   7 -19   1   38.90   21.50
  -8  19  -1    0.70   10.10
   8 -19   1    6.10   15.80
   8 -19   1   18.50   16.50
   4  18  -1   -5.30   11.20
   4  18  -1   16.20    9.80
  -4 -18   1   -4.80   12.70
  -4 -18   1   16.40    9.00
  -4 -18   1   -5.20   10.60
  -4 -18   1  -12.60   10.30
   3  18  -1   52.79   17.80
   3  18  -1   36.40   14.00
  -3 -18   1   30.90   16.10
  -3 -18   1   70.39   14.30
  -3 -18   1   58.29   16.20
  -3 -18   1   52.19   15.10
   2  18  -1   -7.80   10.50
   2  18  -1  -11.10   10.40
   2  18  -1   -0.10    2.20
  -2 -18   1    2.30    8.40
  -2 -18   1  -13.30    9.30
  -2 -18   1    3.20   13.00
  -2 -18   1   -5.30    2.70
  -2 -18   1    1.90   11.20
   1  18  -1   19.50   14.20
   1  18  -1    4.30   11.60
   1  18  -1    3.80   11.30
   1  18  -1   -2.70    3.10
  -1 -18   1  -13.00   10.70
  -1 -18   1   -0.60   10.50
  -1 -18   1    8.60    9.60
  -1 -18   1   12.30   10.10
   0  18  -1    8.60   13.50
   0  18  -1  -11.50    9.60
   0  18  -1    3.50   10.90
   0  18  -1   -2.70    4.30
   0 -18   1    5.60    5.90
   0 -18   1   16.50   10.10
   0 -18   1    7.00   11.10
   0 -18   1   11.90   12.40
  -1  18  -1   64.89   16.10
  -1  18  -1  105.49   11.60
  -1  18  -1   82.59   20.70
  -1  18  -1   65.59   16.10
   1 -18   1   98.79   20.70
   1 -18   1   79.09   17.20
   1 -18   1   76.39   14.50
  -2  18  -1  160.08   21.90
  -2  18  -1  117.09   18.80
  -2  18  -1  115.09   21.00
   2 -18   1  141.29   16.50
   2 -18   1  125.79   23.60
   2 -18   1   79.59   18.10
  -3  18  -1   -4.60    9.20
  -3  18  -1    0.10    5.70
  -3  18  -1    2.50   12.30
  -3  18  -1    6.00    9.90
   3 -18   1    4.30    7.60
   3 -18   1   29.80    9.60
   3 -18   1   -6.30    4.30
   3 -18   1   -0.60   10.90
   3 -18   1    2.20   13.30
   3 -18   1    0.50    8.00
  -4  18  -1    9.40   10.50
  -4  18  -1    6.50    9.30
  -4  18  -1   32.90   11.90
   4 -18   1   24.90   14.40
   4 -18   1    0.40    4.10
   4 -18   1   -2.70   13.50
   4 -18   1   13.80    6.70
   4 -18   1   -1.90    8.60
   4 -18   1    3.30   13.70
  -5  18  -1   41.00   12.60
  -5  18  -1   34.20   13.60
  -5  18  -1   32.30   11.50
   5 -18   1   29.00   14.70
   5 -18   1   42.30   15.30
   5 -18   1   20.90   16.30
   5 -18   1   33.70   18.00
   5 -18   1   37.70   12.00
  -6  18  -1   27.00   11.20
  -6  18  -1   31.30   12.20
  -6  18  -1   43.20   10.00
  -6  18  -1   39.00   12.10
   6 -18   1   21.60   10.10
   6 -18   1   45.00   17.20
   6 -18   1   43.60   17.50
   6 -18   1   35.90   14.50
   6 -18   1   14.40   14.60
  -7  18  -1  203.68   21.00
  -7  18  -1  202.08   20.90
  -7  18  -1  152.78   22.50
  -7  18  -1  164.98   23.00
   7 -18   1  188.88   31.30
   7 -18   1  188.28   29.60
   7 -18   1  171.78   17.90
   7 -18   1  150.08   21.30
   7 -18   1  201.78   33.70
   7 -18   1  175.58   28.00
  -8  18  -1    7.60    8.90
  -8  18  -1   28.10   10.10
   8 -18   1   12.30   13.30
   8 -18   1    0.70   12.80
   8 -18   1    9.50   11.00
  -9  18  -1   29.80   10.20
  -9  18  -1   32.30    9.60
  -9  18  -1    4.50   10.40
  -9  18  -1   14.80    9.40
   9 -18   1   71.69   22.30
   9 -18   1   14.10   15.50
   9 -18   1    3.50   11.20
   9 -18   1   57.59   17.80
   5  17  -1   20.50   10.00
   5  17  -1   11.70   12.60
   5  17  -1   -4.20    7.10
  -5 -17   1   -0.90    8.00
  -5 -17   1   -2.80   12.30
  -5 -17   1   30.50   16.30
  -5 -17   1   12.70   11.50
  -5 -17   1    5.10   10.50
   4  17  -1   41.10    9.90
   4  17  -1   69.29   16.50
   4  17  -1   34.60   14.10
   4  17  -1   48.90   12.70
  -4 -17   1   40.90   11.50
  -4 -17   1   45.70   13.70
  -4 -17   1   68.19   19.00
  -4 -17   1   51.89   15.40
   3  17  -1    0.60   10.60
   3  17  -1   -3.10    1.50
   3  17  -1   -4.10    9.00
  -3 -17   1    0.00    4.20
  -3 -17   1   -1.20    9.90
  -3 -17   1    9.10   11.00
  -3 -17   1    2.00    8.00
  -3 -17   1   18.30   17.10
   2  17  -1   58.89   18.70
   2  17  -1   48.40   16.30
   2  17  -1   54.19   15.30
  -2 -17   1   62.39   19.20
  -2 -17   1   48.10   11.90
  -2 -17   1   43.30   12.40
  -2 -17   1   50.39   17.20
   1  17  -1    5.90   12.20
   1  17  -1   -0.70    3.70
   1  17  -1   -1.50   12.80
   1  17  -1    4.40   10.60
  -1 -17   1    3.10    9.10
  -1 -17   1    2.60    1.90
  -1 -17   1    1.60   11.80
  -1 -17   1   11.90    9.60
   0  17  -1   16.30   12.00
   0  17  -1   17.90    5.70
   0  17  -1   10.40    9.90
   0  17  -1   13.50   13.40
   0 -17   1    9.40   11.30
   0 -17   1    7.90    7.50
   0 -17   1   -8.20   10.00
   0 -17   1   26.00   10.70
   0 -17   1   15.80    9.40
  -1  17  -1    6.30   10.90
  -1  17  -1   27.10   13.70
  -1  17  -1    5.30   10.20
  -1  17  -1   11.80    5.30
   1 -17   1   19.50   10.70
   1 -17   1   19.20   13.40
   1 -17   1   25.30   10.00
   1 -17   1   -5.00    5.50
   1 -17   1    9.60    9.00
  -2  17  -1   16.60   11.70
  -2  17  -1   24.70   12.00
  -2  17  -1    9.30    3.70
  -2  17  -1   26.50   13.10
   2 -17   1    7.20    4.70
   2 -17   1   37.30   13.50
   2 -17   1   21.60   13.90
   2 -17   1    6.60    4.70
   2 -17   1   42.00    9.70
  -3  17  -1   11.30    9.60
  -3  17  -1   -1.90    8.10
  -3  17  -1    3.40    9.30
   3 -17   1    5.70    7.50
   3 -17   1   18.90    8.60
   3 -17   1    6.70   10.40
   3 -17   1   12.90    8.60
   3 -17   1   20.80   13.70
   3 -17   1   -5.30    3.40
  -4  17  -1   45.70   12.20
  -4  17  -1   46.60   13.10
  -4  17  -1   19.80    7.10
  -4  17  -1   35.40   12.70
   4 -17   1   38.50   15.80
   4 -17   1   16.20   14.50
   4 -17   1   34.40    8.20
   4 -17   1   34.20   10.00
   4 -17   1   34.10    8.30
   4 -17   1   35.40   14.50
  -5  17  -1    9.50    9.30
  -5  17  -1    9.10    9.80
  -5  17  -1   21.10   11.90
   5 -17   1    4.50    6.60
   5 -17   1    6.30    1.80
   5 -17   1    2.40   10.80
   5 -17   1    7.10    9.30
   5 -17   1    8.50   13.40
   5 -17   1    3.70    1.90
   5 -17   1   20.20   15.50
   5 -17   1    2.10    3.80
   5 -17   1   -4.50   11.40
  -6  17  -1   13.50    8.80
  -6  17  -1   19.00    9.30
  -6  17  -1   13.00   10.00
   6 -17   1   10.80    6.60
   6 -17   1    7.30   13.00
   6 -17   1    3.10   11.60
   6 -17   1   34.60   11.70
   6 -17   1   35.20   16.20
   6 -17   1   26.20   17.40
   6 -17   1   -2.50    4.50
  -7  17  -1    2.80    9.60
  -7  17  -1    7.80    9.20
  -7  17  -1  -15.90    6.80
  -7  17  -1    8.20    8.90
  -7  17  -1    1.90    8.60
   7 -17   1   -6.00   13.20
   7 -17   1   17.60   14.90
   7 -17   1    2.10   16.10
   7 -17   1   12.70    6.20
   7 -17   1   -3.00    9.70
   7 -17   1   14.30   12.70
  -8  17  -1   66.79   14.90
  -8  17  -1   56.39   13.30
  -8  17  -1   58.89   12.40
  -8  17  -1   43.60    7.30
  -8  17  -1   51.29   11.40
   8 -17   1   68.89   21.50
   8 -17   1   50.99   17.40
   8 -17   1   69.19   20.30
   8 -17   1   43.50   16.90
   8 -17   1   42.30   15.40
  -9  17  -1   15.50    8.40
  -9  17  -1   -1.10   11.20
  -9  17  -1   11.90    5.50
  -9  17  -1    4.90    8.30
  -9  17  -1    2.00    7.50
   9 -17   1    9.70   10.90
   9 -17   1   50.49   17.60
   9 -17   1    5.80   14.90
   6  16  -1   35.50   13.10
   6  16  -1   45.60   13.10
  -6 -16   1   29.70   15.40
  -6 -16   1   21.70   16.50
  -6 -16   1    9.20   14.50
   5  16  -1   31.60   13.30
   5  16  -1   25.40    8.40
   5  16  -1   21.30   11.10
  -5 -16   1   42.30   16.00
  -5 -16   1   42.50   12.80
  -5 -16   1   29.60   16.90
  -5 -16   1   37.70   13.60
   4  16  -1   -0.30   10.30
   4  16  -1   28.90   11.80
   4  16  -1    6.20    9.10
  -4 -16   1   14.50    8.40
  -4 -16   1   21.20   11.60
  -4 -16   1   13.30   12.50
  -4 -16   1    4.90   12.70
   3  16  -1   -1.40    1.40
   3  16  -1   -7.50   10.10
   3  16  -1   -2.50    9.90
  -3 -16   1   12.80   11.20
  -3 -16   1   -2.70    7.40
  -3 -16   1   13.10   10.10
  -3 -16   1    3.50    6.00
  -3 -16   1    5.90   10.90
  -3 -16   1   -2.30   10.50
   2  16  -1   47.40   13.60
   2  16  -1   38.70    5.90
   2  16  -1   14.70   11.80
   2  16  -1   51.49   19.70
  -2 -16   1   53.49   14.40
  -2 -16   1   55.19   13.10
  -2 -16   1   45.20    7.80
  -2 -16   1   34.50   15.10
  -2 -16   1   39.30   13.60
  -2 -16   1   26.20   10.20
   1  16  -1   76.09   15.50
   1  16  -1   92.49   19.40
   1  16  -1   64.69    8.10
   1  16  -1   58.89   14.80
  -1 -16   1   67.89   14.20
  -1 -16   1   65.89    8.30
  -1 -16   1   73.79   14.00
  -1 -16   1   76.79   16.90
  -1 -16   1   55.09   10.60
  -1 -16   1   67.29   15.70
  -1 -16   1   64.89   14.10
   0  16  -1   -1.40    9.90
   0  16  -1    2.10    9.60
   0  16  -1   -1.10    3.80
   0  16  -1   -6.30    8.40
   0 -16   1   -4.80    9.10
   0 -16   1    3.40    9.00
   0 -16   1   -3.00    9.20
   0 -16   1   -6.50   10.70
   0 -16   1    4.00    6.90
   0 -16   1    8.80    9.90
   0 -16   1    2.70    2.80
  -1  16  -1   62.19   14.00
  -1  16  -1   62.79    8.70
  -1  16  -1   95.29   17.90
  -1  16  -1   52.19   13.40
   1 -16   1   55.19   15.50
   1 -16   1   56.19   11.60
   1 -16   1   52.39   15.50
   1 -16   1   56.19   14.00
  -2  16  -1   22.90   11.40
  -2  16  -1   11.90    6.20
   2 -16   1    2.50    7.40
   2 -16   1   21.00   13.20
   2 -16   1    8.80    6.80
   2 -16   1   31.70   12.80
   2 -16   1   19.60   10.30
   2 -16   1   21.80   10.20
  -3  16  -1  410.26   33.20
  -3  16  -1  300.67   27.60
  -3  16  -1  362.66   29.50
   3 -16   1  339.47   25.30
   3 -16   1  309.97   30.40
   3 -16   1  396.56   28.20
   3 -16   1  370.36   26.70
  -4  16  -1    4.00    7.50
  -4  16  -1    7.80   11.70
  -4  16  -1    5.40    8.90
  -4  16  -1  -14.70    6.70
   4 -16   1   -0.90   12.90
   4 -16   1  -10.50    6.60
   4 -16   1    1.40    3.30
   4 -16   1    6.30    6.10
   4 -16   1    3.00   11.20
   4 -16   1   -1.80    5.30
   4 -16   1    4.60    6.50
  -5  16  -1    1.50    6.80
  -5  16  -1    1.10    7.70
  -5  16  -1   -0.80   10.90
  -5  16  -1   -6.30    5.60
   5 -16   1  -10.50    7.90
   5 -16   1    0.90    3.80
   5 -16   1    2.40    1.40
   5 -16   1  -10.90    8.90
   5 -16   1    2.20    1.50
   5 -16   1    1.20   11.50
   5 -16   1   -2.10    4.70
   5 -16   1   11.10   15.00
   5 -16   1   -1.30   11.40
  -6  16  -1    4.40    7.00
  -6  16  -1   -4.90    6.50
  -6  16  -1   -7.40    6.30
  -6  16  -1   -6.40    8.40
  -6  16  -1   -6.60    7.10
   6 -16   1  -14.50   10.20
   6 -16   1    1.90    5.30
   6 -16   1   -6.70    3.10
   6 -16   1    7.60   13.90
   6 -16   1    0.80   12.60
   6 -16   1   -1.30   10.60
   6 -16   1   -3.60    9.20
  -7  16  -1    9.80    8.50
  -7  16  -1   10.90    5.30
  -7  16  -1   -0.90    6.40
  -7  16  -1    1.10    7.30
  -7  16  -1   23.90    9.80
  -7  16  -1   20.20   11.40
  -7  16  -1   -4.90    6.10
   7 -16   1    4.00    5.60
   7 -16   1    1.50   10.80
   7 -16   1   -0.30    9.70
   7 -16   1    7.30   14.80
   7 -16   1    4.30   12.90
   7 -16   1    9.80   14.20
  -8  16  -1  107.89   14.90
  -8  16  -1  106.69   15.60
  -8  16  -1  110.19   18.00
  -8  16  -1  119.99   14.60
  -8  16  -1  106.39   14.90
  -8  16  -1  111.49   15.50
  -8  16  -1  113.69   12.00
   8 -16   1   77.99   21.60
   8 -16   1  157.78   26.20
   8 -16   1  128.99   27.50
   8 -16   1  112.69   20.00
   8 -16   1  116.59   23.30
  -9  16  -1    7.50    7.30
  -9  16  -1   -1.60    6.20
  -9  16  -1   22.20    8.70
  -9  16  -1   13.40   10.80
  -9  16  -1    7.50    7.90
  -9  16  -1    7.40    5.50
   9 -16   1    8.90   16.40
   9 -16   1   33.10   14.90
   9 -16   1   10.80   11.80
   9 -16   1   -1.40   13.60
   9 -16   1    9.10   14.00
 -10  16  -1   25.80   12.50
 -10  16  -1   34.50    7.80
 -10  16  -1    2.40    7.20
 -10  16  -1   14.40    7.20
 -10  16  -1    9.00    5.60
  10 -16   1   24.80   16.70
  10 -16   1   28.40   16.20
  10 -16   1   31.90   18.30
  10 -16   1    7.40   16.00
   7  15  -1   14.30   12.80
   7  15  -1   -7.20    8.50
   7  15  -1    3.70   10.90
   7  15  -1   -3.00    2.30
   7  15  -1    4.20   10.40
  -7 -15   1   13.20   17.70
  -7 -15   1   18.70   15.40
   6  15  -1   -6.80    4.00
   6  15  -1    2.80    9.60
   6  15  -1    5.00    2.50
   6  15  -1  -11.60    4.70
   6  15  -1   10.90   11.20
  -6 -15   1    8.00   11.60
  -6 -15   1   -5.20   11.80
  -6 -15   1  -21.30    9.90
   5  15  -1    2.20   11.10
   5  15  -1   -1.90    7.60
   5  15  -1   -6.60    5.40
   5  15  -1   -1.90    2.40
   5  15  -1   -5.30    6.20
  -5 -15   1   27.00   10.70
  -5 -15   1    3.80   10.10
  -5 -15   1    6.60   12.30
  -5 -15   1    8.30   10.10
   4  15  -1   40.50    8.30
   4  15  -1   54.49   14.20
   4  15  -1   35.10   14.20
  -4 -15   1   42.00   10.60
  -4 -15   1   43.20   12.70
  -4 -15   1   33.50   15.00
  -4 -15   1   43.70   13.40
   3  15  -1    7.00    9.30
   3  15  -1    0.80    2.70
   3  15  -1    5.20    8.80
   3  15  -1    8.40   11.00
  -3 -15   1   -2.20   10.90
  -3 -15   1   -2.90    8.20
  -3 -15   1    7.70    7.50
  -3 -15   1   -9.50    9.00
   2  15  -1    9.50    9.40
   2  15  -1   15.60   10.90
   2  15  -1   -4.20    8.10
   2  15  -1   -0.90    2.90
  -2 -15   1    6.90    7.40
  -2 -15   1    2.40    5.80
  -2 -15   1   -0.80    5.30
  -2 -15   1    7.20   11.30
  -2 -15   1   -9.40    6.50
  -2 -15   1   11.10    9.00
   1  15  -1   71.19   15.60
   1  15  -1   66.69   16.90
   1  15  -1   50.99    8.00
   1  15  -1   80.69   15.30
  -1 -15   1   61.69   16.40
  -1 -15   1   76.39   14.10
  -1 -15   1   67.59    9.10
  -1 -15   1   60.69   12.60
  -1 -15   1   67.89   12.50
  -1 -15   1   82.79   16.30
   0  15  -1   40.60   11.90
   0  15  -1   21.60    5.70
   0  15  -1   35.80   11.30
   0  15  -1   34.40   12.00
   0  15  -1   29.30   13.80
   0 -15   1   21.40   10.00
   0 -15   1   14.70   11.50
   0 -15   1   10.60   11.20
   0 -15   1   29.80   10.00
   0 -15   1   41.10   11.20
  -1  15  -1   78.89   14.60
  -1  15  -1   87.89   13.40
  -1  15  -1   77.29   17.10
  -1  15  -1   60.49   13.60
  -1  15  -1   80.19   10.20
   1 -15   1   89.49    8.20
   1 -15   1   66.59   13.70
   1 -15   1   59.09   15.40
   1 -15   1   91.99   11.70
   1 -15   1   99.19   15.80
   1 -15   1   70.29   12.40
   1 -15   1   65.29   14.40
   1 -15   1   97.89   16.60
  -2  15  -1   12.70   10.30
  -2  15  -1    6.70    5.10
  -2  15  -1    3.40    8.80
  -2  15  -1    4.30    7.70
  -2  15  -1   -5.70    6.00
   2 -15   1   -0.60    5.30
   2 -15   1   -8.70    8.20
   2 -15   1    1.20   10.60
   2 -15   1    5.70    4.40
   2 -15   1    1.90    8.80
   2 -15   1   -0.10    6.90
   2 -15   1   13.90    8.10
   2 -15   1    6.90    7.10
  -3  15  -1  909.11   59.49
  -3  15  -1  944.91   58.99
  -3  15  -1 1015.40   58.49
  -3  15  -1 1049.09   63.59
  -3  15  -1  965.80   56.49
   3 -15   1  949.51   58.39
   3 -15   1  972.20   58.79
   3 -15   1  929.31   63.99
   3 -15   1  884.91   61.59
   3 -15   1 1041.10   54.59
   3 -15   1  958.10   57.29
   3 -15   1  959.20   56.59
   3 -15   1  996.50   60.39
  -4  15  -1   86.19   12.30
  -4  15  -1   62.29   15.00
  -4  15  -1   61.09   13.80
  -4  15  -1   77.19   13.20
   4 -15   1   61.49    9.80
   4 -15   1   58.99   17.20
   4 -15   1   76.59   10.10
   4 -15   1   62.29    9.60
   4 -15   1   41.40   14.40
   4 -15   1   67.49   12.80
   4 -15   1   53.69    9.40
   4 -15   1   82.09   16.60
  -5  15  -1    5.20    4.90
  -5  15  -1    2.70    6.10
  -5  15  -1   -4.40    5.50
  -5  15  -1   -6.20    7.90
  -5  15  -1  -10.70    6.50
   5 -15   1   -1.20   11.50
   5 -15   1   -2.00    4.90
   5 -15   1    0.60    6.80
   5 -15   1    5.40   10.40
   5 -15   1    4.20    7.10
   5 -15   1    6.10    8.40
   5 -15   1    1.30   10.80
   5 -15   1    0.70    2.80
   5 -15   1  -13.00   10.30
  -6  15  -1   15.20    8.20
  -6  15  -1   31.10    9.10
  -6  15  -1   15.90    5.60
  -6  15  -1   28.00    8.00
  -6  15  -1   16.30    9.90
  -6  15  -1   17.90    9.70
   6 -15   1   17.40    6.40
   6 -15   1    5.00   11.50
   6 -15   1    8.60   14.30
   6 -15   1   13.80   10.80
   6 -15   1   29.10   13.80
   6 -15   1   18.40    8.00
   6 -15   1   31.60   13.80
  -7  15  -1   14.60    8.70
  -7  15  -1   26.40    9.20
  -7  15  -1   14.00    7.50
  -7  15  -1   23.40    8.00
  -7  15  -1   28.70    6.10
  -7  15  -1   30.30   10.00
   7 -15   1   18.60   13.70
   7 -15   1   -3.40    9.50
   7 -15   1   20.90    6.40
   7 -15   1   16.80   15.70
   7 -15   1   36.10   16.10
   7 -15   1   32.40   18.30
  -8  15  -1   -2.80    5.60
  -8  15  -1   -4.90    6.10
  -8  15  -1   10.10    7.30
  -8  15  -1   -5.80    4.50
  -8  15  -1    8.30    7.90
  -8  15  -1    0.70    9.00
  -8  15  -1    3.50    6.80
   8 -15   1    6.20   14.40
   8 -15   1   -6.10   10.60
   8 -15   1   -7.20   11.30
   8 -15   1    7.60   12.60
   8 -15   1   -6.90   11.30
  -9  15  -1   -7.90    5.80
  -9  15  -1    0.90    6.60
  -9  15  -1   10.80    7.00
  -9  15  -1   -5.20    9.20
  -9  15  -1   -1.90    4.90
  -9  15  -1  -10.50    6.10
   9 -15   1    1.60   12.80
   9 -15   1   20.70   14.40
   9 -15   1    0.10   13.80
   9 -15   1  -26.90    8.90
   9 -15   1    6.70   12.60
 -10  15  -1    6.70    5.50
 -10  15  -1    1.10    6.40
 -10  15  -1   11.20    5.50
 -10  15  -1    2.20    7.30
 -10  15  -1   20.70    6.10
 -10  15  -1   -4.70    9.40
  10 -15   1    8.90   14.50
  10 -15   1    8.30   13.10
  10 -15   1   24.10   16.30
  10 -15   1   12.40   15.80
 -11  15  -1   20.20    6.50
 -11  15  -1   17.80   11.90
 -11  15  -1   27.10    7.10
  11 -15   1   16.00   17.00
  11 -15   1   24.70   15.40
   8  14  -1  197.88   22.40
   8  14  -1  270.77   28.50
   8  14  -1  224.58   25.90
  -8 -14   1  240.28   26.20
   7  14  -1   -9.40    4.90
   7  14  -1    7.50   10.60
   7  14  -1   -1.00   10.30
   7  14  -1   -5.70   11.40
  -7 -14   1   11.20   11.50
  -7 -14   1   10.10   11.70
  -7 -14   1   26.00   15.90
   6  14  -1    5.60    9.20
   6  14  -1   -0.70    2.10
   6  14  -1    5.20    9.20
   6  14  -1   -9.80    4.60
  -6 -14   1   17.30   14.90
  -6 -14   1    7.40    7.20
  -6 -14   1    4.30    9.80
  -6 -14   1    8.80   12.90
   5  14  -1    4.80    9.90
   5  14  -1   22.60   12.90
   5  14  -1   16.50    5.60
   5  14  -1   11.00    9.00
  -5 -14   1   -4.60   10.80
  -5 -14   1   19.40   13.10
  -5 -14   1   19.70   10.90
  -5 -14   1   26.70   10.10
   4  14  -1   -1.40    1.90
   4  14  -1   -3.70    9.00
   4  14  -1   -4.30    7.30
   4  14  -1   -0.60    9.50
   4  14  -1   -0.80   11.60
  -4 -14   1    1.50    8.90
  -4 -14   1  -14.90   10.60
  -4 -14   1   13.70    8.40
  -4 -14   1   -8.50    9.30
   3  14  -1    7.20    8.00
   3  14  -1   23.80   12.30
   3  14  -1   18.80    9.90
   3  14  -1   19.50    3.90
   3  14  -1   11.90   11.90
  -3 -14   1   10.50    7.60
  -3 -14   1    6.90    6.60
  -3 -14   1   12.80   11.70
  -3 -14   1   10.80    9.00
  -3 -14   1   10.20    9.90
   2  14  -1    4.00    3.30
   2  14  -1   12.30    9.80
   2  14  -1    2.50    6.80
   2  14  -1   16.80   11.30
   2  14  -1   -4.20    7.90
  -2 -14   1    5.30    9.30
  -2 -14   1    6.90    6.30
  -2 -14   1   -5.00    8.30
  -2 -14   1   12.00   11.60
  -2 -14   1    1.90    6.80
   1  14  -1   92.99    9.40
   1  14  -1  119.39   20.20
   1  14  -1  127.59   17.90
   1  14  -1  109.69   16.60
  -1 -14   1  108.99   16.60
  -1 -14   1  122.49   16.20
  -1 -14   1   81.79   16.10
  -1 -14   1  120.59   17.90
  -1 -14   1   86.89   14.40
   0  14  -1   27.90   10.60
   0  14  -1   38.40   15.00
   0  14  -1   21.20   10.20
   0  14  -1   34.30    6.20
   0 -14   1   30.10    7.40
   0 -14   1   32.10   11.80
   0 -14   1   14.40    8.90
   0 -14   1   34.60   10.80
   0 -14   1   22.10    8.90
   0 -14   1   35.70   10.70
  -1  14  -1    6.60    8.70
  -1  14  -1   15.70    5.60
  -1  14  -1    7.60    8.20
  -1  14  -1   17.30   11.30
   1 -14   1   13.30    7.80
   1 -14   1   20.70    9.00
   1 -14   1   12.60    5.60
   1 -14   1    8.30    8.40
   1 -14   1    9.00    4.60
   1 -14   1   -2.70    9.00
   1 -14   1   13.00    7.30
   1 -14   1   10.70    9.40
  -2  14  -1   20.60   12.30
  -2  14  -1   19.00    9.40
  -2  14  -1   19.70    8.60
  -2  14  -1   14.50    7.70
  -2  14  -1   19.20    6.20
   2 -14   1   22.20   10.00
   2 -14   1   24.00   10.50
   2 -14   1    6.80    8.10
   2 -14   1   10.30    8.60
   2 -14   1   25.10    6.70
   2 -14   1   24.70    5.80
   2 -14   1    5.10   10.80
   2 -14   1   15.90    7.90
  -3  14  -1  166.78   21.80
  -3  14  -1  147.59   15.20
  -3  14  -1  138.19   13.70
  -3  14  -1  139.79   16.80
  -3  14  -1  141.29   17.10
   3 -14   1  163.78   13.60
   3 -14   1  144.59   14.30
   3 -14   1  123.79   21.40
   3 -14   1  158.68   19.90
   3 -14   1  158.08   18.40
   3 -14   1  219.18   26.20
  -4  14  -1   33.00    8.70
  -4  14  -1   37.60   10.00
  -4  14  -1   37.80   10.70
  -4  14  -1   35.90   11.30
  -4  14  -1   31.10    7.10
   4 -14   1   23.50   12.30
   4 -14   1   21.80    6.50
   4 -14   1   32.70    7.50
   4 -14   1   40.30   10.20
   4 -14   1   22.80   13.80
   4 -14   1   32.10    8.20
   4 -14   1   18.40   11.00
   4 -14   1   24.80   10.60
  -5  14  -1  190.28   20.10
  -5  14  -1  155.68   15.10
  -5  14  -1  181.68   13.70
  -5  14  -1  150.98   16.00
  -5  14  -1  142.29   16.40
   5 -14   1  144.19   24.30
   5 -14   1  128.09   18.00
   5 -14   1  166.18   14.70
   5 -14   1  122.29   21.50
   5 -14   1  133.99   21.60
   5 -14   1  161.98   23.40
   5 -14   1  145.19   17.60
   5 -14   1  171.58   16.20
   5 -14   1  153.08   14.80
  -6  14  -1   10.20    6.40
  -6  14  -1   10.50    6.30
  -6  14  -1   11.50    5.90
  -6  14  -1    4.80    8.30
  -6  14  -1    9.70    6.60
  -6  14  -1    8.60    5.10
   6 -14   1   12.00    5.90
   6 -14   1    7.10   11.20
   6 -14   1   -0.20   10.20
   6 -14   1   10.40   10.20
   6 -14   1   16.10    6.60
   6 -14   1   14.70   14.90
   6 -14   1    7.60   16.30
   6 -14   1   14.00    5.80
   6 -14   1    3.00    8.50
  -7  14  -1   87.59   14.10
  -7  14  -1   85.19   12.40
  -7  14  -1   87.39    9.70
  -7  14  -1   62.29   11.50
  -7  14  -1   72.69   11.60
  -7  14  -1   96.79   14.50
  -7  14  -1   93.09   11.60
   7 -14   1   87.69   22.50
   7 -14   1   97.29   19.50
   7 -14   1   78.39    9.30
   7 -14   1   80.09   19.10
   7 -14   1   76.79   15.10
  -8  14  -1   24.90    6.50
  -8  14  -1   27.60    8.00
  -8  14  -1   11.90    5.40
  -8  14  -1   18.80    8.30
  -8  14  -1    6.50    9.00
  -8  14  -1   10.80    7.10
  -8  14  -1    9.20    6.60
   8 -14   1   36.40   16.80
   8 -14   1   32.80   14.10
   8 -14   1   26.60   15.80
   8 -14   1    8.80   11.50
   8 -14   1   10.30   12.50
  -9  14  -1   21.90    7.00
  -9  14  -1   22.60    6.30
  -9  14  -1   30.00    8.30
  -9  14  -1   -7.20    8.20
  -9  14  -1   21.70    6.90
  -9  14  -1   14.00    5.40
   9 -14   1   30.60   15.70
   9 -14   1   24.10   16.10
   9 -14   1   14.60   15.10
   9 -14   1   11.30   14.40
 -10  14  -1   -0.90    5.30
 -10  14  -1   12.40    4.80
 -10  14  -1   -1.20    4.30
 -10  14  -1    6.30    9.20
 -10  14  -1   -1.70    4.90
 -10  14  -1   -3.80    5.50
  10 -14   1    1.00   13.20
  10 -14   1   21.50   14.80
  10 -14   1    7.90   14.30
  10 -14   1    3.10   16.70
 -11  14  -1  106.19   12.50
 -11  14  -1  110.29   11.90
 -11  14  -1  109.39   18.20
  11 -14   1  114.99   24.50
  11 -14   1  115.19   25.50
   9  13  -1   38.80   12.00
   8  13  -1   -4.30   10.00
   8  13  -1   -7.20    5.80
   8  13  -1   32.30   11.00
   8  13  -1   26.40   13.80
  -8 -13   1  -14.30   10.30
  -8 -13   1   -3.80    9.30
  -8 -13   1   12.80   12.30
   7  13  -1   -0.50    5.10
   7  13  -1   -2.20    9.00
   7  13  -1   10.40   11.10
   7  13  -1   10.60    8.70
   7  13  -1   -3.60    1.30
   7  13  -1   -0.10    1.20
   7  13  -1    3.20   10.20
  -7 -13   1   16.60   12.10
  -7 -13   1    0.70   12.70
  -7 -13   1   -0.60   10.00
  -7 -13   1   12.00   10.90
   6  13  -1   33.40   12.20
   6  13  -1   25.40   10.90
   6  13  -1   49.40   11.20
  -6 -13   1   26.60    6.90
  -6 -13   1   28.20   10.80
  -6 -13   1   31.40   12.90
  -6 -13   1   20.80    9.60
  -6 -13   1   43.20   12.20
   5  13  -1   38.50   10.30
   5  13  -1   55.09   11.90
   5  13  -1   53.99   23.30
   5  13  -1   58.29   13.50
  -5 -13   1   42.60   12.70
  -5 -13   1   42.60   12.80
  -5 -13   1   64.99   12.90
  -5 -13   1   63.39   16.80
   4  13  -1   97.69   18.60
   4  13  -1   72.19   14.70
   4  13  -1   71.89   14.10
   4  13  -1   79.39   12.50
   4  13  -1   81.39   13.40
  -4 -13   1   66.49   13.20
  -4 -13   1   61.79   13.80
  -4 -13   1   50.89    9.70
  -4 -13   1   67.09   14.30
  -4 -13   1   53.89   15.40
   3  13  -1   46.40   12.20
   3  13  -1   34.70   13.30
   3  13  -1   42.10   10.60
  -3 -13   1   67.39   11.30
  -3 -13   1   48.60   13.10
  -3 -13   1   52.59   11.80
  -3 -13   1   58.39   13.00
  -3 -13   1   58.59   15.20
   2  13  -1  269.87   24.50
   2  13  -1  322.87   29.70
   2  13  -1  322.87   26.80
  -2 -13   1  285.77   24.10
  -2 -13   1  308.27   25.40
  -2 -13   1  308.97   27.70
   1  13  -1    5.20    3.80
   1  13  -1   -5.20    7.70
   1  13  -1    6.90    8.30
   1  13  -1    8.90   10.20
  -1 -13   1   11.50   10.40
  -1 -13   1   -5.50    5.80
  -1 -13   1    2.50    5.40
  -1 -13   1    5.70    8.10
  -1 -13   1   -2.50    7.60
  -1 -13   1    3.40    8.20
   0  13  -1    7.70    7.90
   0  13  -1   -5.60    8.40
   0  13  -1   -1.00    3.80
   0  13  -1   10.50   10.40
   0 -13   1   11.60    5.40
   0 -13   1   -3.70    6.60
   0 -13   1   -5.50    6.90
   0 -13   1    1.40    8.20
   0 -13   1    5.20    9.40
   0 -13   1    0.20    7.10
   0 -13   1   -8.30    8.40
  -1  13  -1   -1.20    6.30
  -1  13  -1   -2.50    7.60
  -1  13  -1   -7.80    8.30
  -1  13  -1   -3.50    6.50
  -1  13  -1    0.40    4.20
   1 -13   1   -2.60    8.20
   1 -13   1    2.10    7.60
   1 -13   1    3.00    8.80
   1 -13   1   -0.20    6.40
   1 -13   1   -0.40    5.00
   1 -13   1    4.00    7.90
   1 -13   1   -4.90    6.80
  -2  13  -1  421.46   32.00
  -2  13  -1  513.45   31.80
  -2  13  -1  487.15   35.60
  -2  13  -1  437.36   32.30
  -2  13  -1  471.85   29.50
   2 -13   1  483.25   33.50
   2 -13   1  483.85   32.00
   2 -13   1  466.55   28.40
   2 -13   1  468.95   36.20
   2 -13   1  427.96   34.00
   2 -13   1  468.75   29.80
   2 -13   1  478.15   30.80
   2 -13   1  479.65   32.30
  -3  13  -1   84.29   15.90
  -3  13  -1   95.79   10.70
  -3  13  -1   89.49   13.00
  -3  13  -1   81.39   12.50
  -3  13  -1  103.49   12.60
   3 -13   1   79.09   15.40
   3 -13   1   79.79   10.50
   3 -13   1   85.39   10.40
   3 -13   1   76.09   16.50
   3 -13   1   62.49   12.10
   3 -13   1   83.49   11.70
  -4  13  -1    5.90    4.90
  -4  13  -1    4.10    5.30
  -4  13  -1    9.60    7.40
  -4  13  -1   -4.00    6.50
  -4  13  -1   -3.80    5.70
   4 -13   1    7.20   11.50
   4 -13   1   10.40    6.20
   4 -13   1   -1.50    8.90
   4 -13   1    5.30    5.10
   4 -13   1   10.30    5.30
   4 -13   1   -3.60    9.10
   4 -13   1   -4.70    6.40
   4 -13   1   15.20    7.30
  -5  13  -1    6.10    6.70
  -5  13  -1    1.40    4.10
  -5  13  -1   -8.50    7.20
  -5  13  -1    6.70    6.60
  -5  13  -1    1.90    2.40
  -5  13  -1   -2.40    5.10
   5 -13   1   -5.20    4.70
   5 -13   1   -6.50    5.70
   5 -13   1    2.80    8.90
   5 -13   1    6.20    9.60
   5 -13   1    2.00   11.60
   5 -13   1   11.00   10.30
   5 -13   1   10.60    8.90
  -6  13  -1   -3.50    5.70
  -6  13  -1   -3.00    5.10
  -6  13  -1    5.20    5.70
  -6  13  -1    3.60    5.80
  -6  13  -1    3.30    4.50
  -6  13  -1    6.10    8.10
   6 -13   1   -7.90   10.60
   6 -13   1   -4.40    7.60
   6 -13   1    6.30   10.20
   6 -13   1    1.30   10.60
   6 -13   1    6.20   10.70
   6 -13   1    1.90    5.00
   6 -13   1   -7.60    7.70
  -7  13  -1   51.29   10.00
  -7  13  -1   54.19   11.30
  -7  13  -1   44.80    8.40
  -7  13  -1   37.40    9.80
  -7  13  -1   46.40    8.60
  -7  13  -1   42.70    9.10
  -7  13  -1   46.00    7.40
   7 -13   1   46.30   14.00
   7 -13   1   41.60   18.90
   7 -13   1   49.00   18.90
   7 -13   1   42.80   14.90
   7 -13   1   62.89   16.30
  -8  13  -1   18.60    8.90
  -8  13  -1   19.50    8.70
  -8  13  -1    5.40    9.00
  -8  13  -1   13.30    5.50
  -8  13  -1   10.40    5.50
  -8  13  -1    7.00    6.10
  -8  13  -1   16.50    8.00
  -8  13  -1   11.00    6.00
   8 -13   1    7.70   13.10
   8 -13   1   16.30   11.40
   8 -13   1   15.70   14.10
   8 -13   1   29.20   12.20
   8 -13   1   21.20   13.20
  -9  13  -1   20.40    6.60
  -9  13  -1   44.30   10.70
  -9  13  -1   43.40    8.00
  -9  13  -1   25.80    6.40
  -9  13  -1   27.80   10.70
  -9  13  -1   33.70    6.60
  -9  13  -1   36.80    7.90
   9 -13   1   42.90   16.80
   9 -13   1   35.60   17.90
   9 -13   1   22.20   14.10
   9 -13   1   38.20   16.80
   9 -13   1   40.50   15.30
 -10  13  -1   73.99    9.70
 -10  13  -1   73.79    9.10
 -10  13  -1   70.49   14.40
 -10  13  -1   79.99    9.90
  10 -13   1   57.99   19.00
  10 -13   1   64.09   20.50
  10 -13   1   85.29   20.10
  10 -13   1   87.29   22.10
 -11  13  -1   -0.30    9.70
 -11  13  -1    2.70    4.40
 -11  13  -1    6.40    4.60
 -11  13  -1    1.40    5.30
  11 -13   1    9.80   14.20
 -12  13  -1   29.80    7.50
   9  12  -1   11.30    6.60
   9  12  -1    2.60   13.30
   9  12  -1   26.30   12.60
   9  12  -1   13.10   10.20
   9  12  -1   -5.90    3.90
  -9 -12   1   -6.50    9.80
   8  12  -1   36.50   10.60
   8  12  -1   29.50   13.40
   8  12  -1   13.20   11.70
  -8 -12   1   33.40   15.90
  -8 -12   1   31.60   13.90
  -8 -12   1   28.70   12.40
   7  12  -1   30.40   11.50
   7  12  -1   26.90   11.80
   7  12  -1   30.50   10.90
  -7 -12   1   53.09   14.60
  -7 -12   1   32.40   11.60
  -7 -12   1   16.30   12.90
  -7 -12   1   29.00   13.10
   6  12  -1    5.80    7.50
   6  12  -1   14.90    4.60
   6  12  -1    0.40   14.00
   6  12  -1   23.40   10.00
  -6 -12   1   18.60   11.30
  -6 -12   1    2.80    7.80
  -6 -12   1   15.30    9.90
  -6 -12   1   32.30    9.90
  -6 -12   1    4.40    8.90
   5  12  -1    2.60    2.20
   5  12  -1    5.00    9.50
   5  12  -1    2.60   11.00
   5  12  -1   -0.90    3.80
   5  12  -1   -5.10    6.70
   5  12  -1    8.30    8.90
  -5 -12   1    1.20    9.40
  -5 -12   1    4.20    7.80
  -5 -12   1   -8.60    9.70
  -5 -12   1   -5.30    5.50
   4  12  -1   75.19   17.90
   4  12  -1   59.99   12.30
   4  12  -1   67.69   11.50
   4  12  -1   66.19   13.80
  -4 -12   1   38.40    8.50
  -4 -12   1   57.29   15.00
  -4 -12   1   73.39   13.70
  -4 -12   1   85.49   13.90
  -4 -12   1   60.49   12.60
   3  12  -1  140.49   21.20
   3  12  -1  140.09   17.30
   3  12  -1  133.69   18.40
  -3 -12   1  124.39   15.40
  -3 -12   1  160.68   21.30
  -3 -12   1  146.99   17.30
  -3 -12   1  125.79   11.80
  -3 -12   1  139.49   16.60
   2  12  -1  353.96   30.80
   2  12  -1  380.86   28.80
   2  12  -1  383.76   27.70
   2  12  -1  353.76   26.20
  -2 -12   1  329.27   27.30
  -2 -12   1  371.96   27.90
  -2 -12   1  387.16   30.10
  -2 -12   1  359.16   24.70
  -2 -12   1  325.67   26.10
   1  12  -1  533.25   35.50
   1  12  -1  540.25   36.40
  -1 -12   1  518.15   32.30
  -1 -12   1  540.75   35.70
  -1 -12   1  554.14   35.70
  -1 -12   1  449.16   33.40
  -1 -12   1  531.25   37.40
   0  12  -1  115.89   15.50
   0  12  -1  145.59   11.30
   0  12  -1  143.69   19.60
   0  12  -1  127.59   16.40
   0 -12   1  123.09   12.50
   0 -12   1  155.38   16.60
   0 -12   1  115.49   14.20
   0 -12   1  116.79   15.50
   0 -12   1  130.59   14.90
   0 -12   1  135.29   16.80
   0 -12   1  117.59   17.20
  -1  12  -1   16.30    7.70
  -1  12  -1   15.30   11.30
  -1  12  -1   10.00    7.60
  -1  12  -1   13.20    7.30
  -1  12  -1    5.20    4.70
   1 -12   1   12.10   10.40
   1 -12   1   15.50    8.90
   1 -12   1   14.60    5.60
   1 -12   1   11.10    6.70
   1 -12   1   15.60    9.50
   1 -12   1   31.90    9.00
   1 -12   1   12.40    7.70
  -2  12  -1   -3.00    7.60
  -2  12  -1    1.00    5.90
  -2  12  -1   10.80    5.10
  -2  12  -1    1.20    7.10
  -2  12  -1   -1.30    7.00
   2 -12   1    5.10    6.70
   2 -12   1    1.70    9.20
   2 -12   1    4.20    8.80
   2 -12   1   -0.50    7.80
   2 -12   1   -1.40    7.10
   2 -12   1    5.90    5.20
   2 -12   1    1.70    5.80
  -3  12  -1   68.79    8.20
  -3  12  -1   78.79   11.60
  -3  12  -1   57.29    8.80
  -3  12  -1   93.79   11.40
  -3  12  -1   64.59   13.80
  -3  12  -1   70.29   11.20
   3 -12   1   62.09    8.70
   3 -12   1   56.09   13.40
   3 -12   1   48.40   14.10
   3 -12   1   66.09    9.60
   3 -12   1   65.09   10.20
   3 -12   1   73.69   12.10
  -4  12  -1  107.69   10.00
  -4  12  -1   95.49   11.60
  -4  12  -1   99.19   15.10
  -4  12  -1  105.09   11.70
  -4  12  -1  102.89   13.20
  -4  12  -1  105.49   13.20
   4 -12   1   80.49    9.40
   4 -12   1   78.39   12.00
   4 -12   1   89.99   12.40
   4 -12   1   85.69    9.60
   4 -12   1   91.79   15.90
   4 -12   1   96.39   10.80
   4 -12   1  112.59   17.30
   4 -12   1   58.19   14.70
   4 -12   1   80.89   17.30
   4 -12   1   89.29   13.50
  -5  12  -1  124.19   10.80
  -5  12  -1  114.99   13.10
  -5  12  -1  122.19   13.10
  -5  12  -1  151.18   16.40
  -5  12  -1  126.49   12.10
  -5  12  -1  107.19   12.80
   5 -12   1  119.29   19.00
   5 -12   1   87.79   17.70
   5 -12   1  129.89   18.80
   5 -12   1   96.29   11.90
   5 -12   1  100.99   15.20
   5 -12   1  101.19   19.90
   5 -12   1  101.39   11.70
  -6  12  -1   -0.60    3.40
  -6  12  -1    7.40    6.50
  -6  12  -1   11.50    4.50
  -6  12  -1    1.70    5.90
  -6  12  -1   -0.30    5.60
  -6  12  -1   11.30    7.80
  -6  12  -1    3.40    4.90
   6 -12   1    5.30    5.20
   6 -12   1   -3.80    9.90
   6 -12   1    9.00   10.00
   6 -12   1    1.00   11.70
   6 -12   1    7.50    5.10
   6 -12   1   12.90   11.10
   6 -12   1   -0.80    1.90
   6 -12   1   -3.30    8.40
   6 -12   1    7.80    8.70
  -7  12  -1  121.19   13.80
  -7  12  -1  139.69   15.20
  -7  12  -1  127.49   14.10
  -7  12  -1  112.09   14.30
  -7  12  -1   92.39   11.80
  -7  12  -1  127.29   15.30
  -7  12  -1  118.89   12.10
  -7  12  -1  114.99   11.10
  -7  12  -1  104.79   10.70
   7 -12   1  132.39   21.30
   7 -12   1  130.99   23.40
   7 -12   1  114.59   21.40
   7 -12   1  125.09   18.40
   7 -12   1  146.39   19.10
   7 -12   1  111.59   20.30
   7 -12   1   93.99    7.70
   7 -12   1  110.69    8.50
  -8  12  -1   99.89   13.80
  -8  12  -1  109.19   15.80
  -8  12  -1  111.49   10.90
  -8  12  -1   91.89   11.10
  -8  12  -1   97.39   10.10
  -8  12  -1   94.79   14.90
  -8  12  -1   87.69   10.90
   8 -12   1  113.79   18.90
   8 -12   1   89.49   18.90
   8 -12   1   98.89   20.20
   8 -12   1  105.29   22.00
   8 -12   1   93.39   22.00
  -9  12  -1    5.00    8.20
  -9  12  -1   34.00    9.80
  -9  12  -1   18.40    5.70
  -9  12  -1   22.90    6.70
  -9  12  -1   22.30    6.00
  -9  12  -1   19.20    6.90
  -9  12  -1   19.10    5.40
   9 -12   1   -0.60   10.90
   9 -12   1   37.30   15.30
   9 -12   1   18.80   14.20
   9 -12   1   26.00   14.70
   9 -12   1   22.20   13.00
 -10  12  -1   20.50    5.50
 -10  12  -1   -3.30    8.20
 -10  12  -1   13.40    5.60
 -10  12  -1   14.60    4.80
  10 -12   1   15.00   14.70
  10 -12   1   21.10   14.10
 -11  12  -1  107.49    9.80
 -11  12  -1  107.29   12.60
 -11  12  -1   92.29   16.10
 -12  12  -1  224.48   15.90
 -12  12  -1  295.97   20.60
 -12  12  -1  247.68   24.50
  10  11  -1    3.80   10.40
  10  11  -1   15.00   12.30
  10  11  -1   11.20   13.60
  10  11  -1   -4.10    6.60
 -10 -11   1    3.00   12.00
 -10 -11   1    2.60    9.10
   9  11  -1   26.90   14.80
   9  11  -1   22.70   10.60
   9  11  -1   34.30   13.70
  -9 -11   1   22.20   11.40
  -9 -11   1   67.49   10.60
  -9 -11   1   29.60   12.90
  -9 -11   1   34.90   12.10
   8  11  -1   12.50    7.20
   8  11  -1  -12.30    8.90
   8  11  -1  -12.90    4.20
   8  11  -1   -6.10    7.00
   8  11  -1   11.60   10.90
  -8 -11   1   -2.30   10.10
  -8 -11   1   -2.40    8.90
  -8 -11   1  -12.10    8.00
   7  11  -1   19.90    7.40
   7  11  -1   29.30   11.00
   7  11  -1   38.30   12.70
   7  11  -1   17.30    9.60
  -7 -11   1   39.10   12.20
  -7 -11   1   21.20   13.20
  -7 -11   1   22.50   11.00
   6  11  -1  126.39   14.30
   6  11  -1  101.69    9.10
   6  11  -1  108.69    7.70
   6  11  -1  101.59   15.40
   6  11  -1   90.99   15.90
   6  11  -1  113.39    9.40
   6  11  -1  105.69   14.90
  -6 -11   1  110.89   18.70
  -6 -11   1  104.29   14.90
  -6 -11   1   94.79   17.30
  -6 -11   1  111.39   17.60
   5  11  -1   58.29    7.20
   5  11  -1   42.20   11.70
   5  11  -1   54.29   14.30
   5  11  -1   48.40    5.20
   5  11  -1   45.40    9.20
   5  11  -1   42.90   11.10
   5  11  -1   46.70   10.30
  -5 -11   1   57.69   14.20
  -5 -11   1   39.70    9.70
  -5 -11   1   41.30    8.80
  -5 -11   1   52.19   12.40
  -5 -11   1   30.20   10.40
  -5 -11   1   42.40   11.50
  -5 -11   1   43.80   11.90
   4  11  -1  144.39   15.80
   4  11  -1  186.68   21.90
   4  11  -1  176.58   19.20
   4  11  -1  165.58   16.70
   4  11  -1  159.98   17.30
  -4 -11   1  182.58   20.80
  -4 -11   1  189.88   18.80
  -4 -11   1  195.98   19.00
  -4 -11   1  151.18   17.10
  -4 -11   1  179.38   15.60
   3  11  -1   29.00    8.60
   3  11  -1   34.20   12.20
   3  11  -1   19.80    9.10
   3  11  -1   21.70    9.30
  -3 -11   1   24.20    6.40
  -3 -11   1   15.00    6.60
  -3 -11   1   10.70   10.40
  -3 -11   1   32.60    9.40
   2  11  -1  180.38   20.80
   2  11  -1  195.38   18.80
   2  11  -1  208.38   18.40
   2  11  -1  162.28   15.70
  -2 -11   1  163.38   17.50
  -2 -11   1  173.78   16.60
  -2 -11   1  175.58   19.50
  -2 -11   1  164.48   12.40
  -2 -11   1  162.08   14.90
  -2 -11   1  172.98   17.70
   1  11  -1   11.80    7.90
   1  11  -1   11.40   10.30
   1  11  -1   14.50    8.30
   1  11  -1    2.10    4.50
  -1 -11   1   14.30    7.90
  -1 -11   1    1.40    8.30
  -1 -11   1   11.40    7.30
  -1 -11   1   18.40    8.40
  -1 -11   1   12.40    5.50
   0  11  -1  115.39   14.80
   0  11  -1  118.99   12.60
   0  11  -1  140.69   18.30
   0  11  -1   73.29   12.60
   0 -11   1  100.69   12.20
   0 -11   1  119.99   16.00
   0 -11   1  117.29   11.20
   0 -11   1  118.49   13.60
   0 -11   1  115.29   13.60
   0 -11   1  123.69   14.40
   0 -11   1  126.79   15.50
  -1  11  -1  652.83   43.00
  -1  11  -1  649.93   43.40
  -1  11  -1  717.73   46.50
  -1  11  -1  705.83   42.50
  -1  11  -1  733.03   40.80
   1 -11   1  673.53   42.10
   1 -11   1  762.42   45.20
   1 -11   1  691.43   45.40
   1 -11   1  752.72   41.30
   1 -11   1  719.03   43.60
   1 -11   1  666.23   43.80
   1 -11   1  801.92   44.20
  -2  11  -1  297.67   23.90
  -2  11  -1  285.07   21.60
  -2  11  -1  275.17   21.50
  -2  11  -1  268.97   20.20
   2 -11   1  280.57   21.00
   2 -11   1  257.67   23.10
   2 -11   1  296.57   19.50
   2 -11   1  283.37   19.90
   2 -11   1  294.27   19.20
   2 -11   1  311.77   22.70
   2 -11   1  321.37   21.90
   2 -11   1  264.57   24.20
  -3  11  -1    8.70    5.70
  -3  11  -1   15.20    7.70
  -3  11  -1   11.00    4.60
  -3  11  -1   15.70    6.60
  -3  11  -1   -1.10    6.10
  -3  11  -1   19.10    5.90
   3 -11   1    8.50    6.10
   3 -11   1   11.70    5.50
   3 -11   1    9.00    4.60
   3 -11   1    4.70    6.70
   3 -11   1    3.60    5.50
   3 -11   1    2.10    7.90
   3 -11   1   -2.60    9.30
  -4  11  -1  187.58   13.30
  -4  11  -1  189.48   15.20
  -4  11  -1  183.58   15.70
  -4  11  -1  189.48   14.70
  -4  11  -1  180.68   15.90
  -4  11  -1  166.48   17.40
   4 -11   1  169.98   17.30
   4 -11   1  172.28   16.30
   4 -11   1  166.38   19.50
   4 -11   1  182.38   19.40
   4 -11   1  166.68   19.00
   4 -11   1  155.68   20.90
   4 -11   1  187.58   14.30
   4 -11   1  188.58   12.70
   4 -11   1  151.08   12.30
  -5  11  -1  117.29   14.60
  -5  11  -1   99.79   11.80
  -5  11  -1   98.49    9.60
  -5  11  -1   85.29   11.40
  -5  11  -1  113.39   12.80
  -5  11  -1   95.29   11.30
   5 -11   1   82.49   14.00
   5 -11   1   84.79   16.20
   5 -11   1  104.19   10.50
   5 -11   1   76.69   16.10
   5 -11   1   91.29   10.60
   5 -11   1   82.19   10.70
   5 -11   1  103.29   17.30
   5 -11   1  112.59   19.80
  -6  11  -1   32.00    7.90
  -6  11  -1   14.20    6.10
  -6  11  -1   25.20    6.80
  -6  11  -1   16.00    7.70
  -6  11  -1   12.30    5.60
  -6  11  -1   12.50    6.90
  -6  11  -1   21.40    5.90
   6 -11   1   37.60   14.90
   6 -11   1   20.30    5.60
   6 -11   1   13.80    9.80
   6 -11   1   15.30   10.60
   6 -11   1   14.60    5.40
   6 -11   1   19.50   10.40
   6 -11   1   18.10   11.80
   6 -11   1   13.10    4.90
   6 -11   1   11.10    9.80
  -7  11  -1   43.10    7.10
  -7  11  -1   42.30    9.50
  -7  11  -1   36.30    7.30
  -7  11  -1   50.59    8.00
  -7  11  -1   55.89    7.20
  -7  11  -1   61.69   10.20
  -7  11  -1   65.49   11.90
  -7  11  -1   36.40    9.30
   7 -11   1   46.90   15.00
   7 -11   1   31.30   15.00
   7 -11   1   64.59   16.20
   7 -11   1   23.20   13.50
   7 -11   1   47.90   13.40
   7 -11   1   55.59   13.70
  -8  11  -1    3.50    7.50
  -8  11  -1   12.50   11.40
  -8  11  -1   18.00    5.20
  -8  11  -1    4.50    4.90
  -8  11  -1    6.90    5.30
  -8  11  -1    9.30    4.80
  -8  11  -1    7.40    4.20
  -8  11  -1   20.20    8.70
  -8  11  -1    9.00    7.20
  -8  11  -1   -0.90    5.70
   8 -11   1   13.90   11.60
   8 -11   1   18.00   11.10
   8 -11   1   13.90   12.60
   8 -11   1   14.80   11.90
   8 -11   1   -1.30   11.10
  -9  11  -1   13.10    8.80
  -9  11  -1   33.20    7.30
  -9  11  -1   22.50    6.00
  -9  11  -1   22.90    9.10
  -9  11  -1   21.50    4.90
  -9  11  -1   25.70   10.40
  -9  11  -1   27.20    4.90
  -9  11  -1   31.10    4.80
   9 -11   1   28.10   13.60
   9 -11   1   30.50   13.90
   9 -11   1   47.20   15.90
   9 -11   1   27.20   16.20
 -10  11  -1    9.20    3.70
 -10  11  -1   -5.50    7.00
 -10  11  -1    7.60    4.20
 -10  11  -1    5.40    5.30
  10 -11   1   -1.20   13.50
  10 -11   1   13.30   12.40
 -11  11  -1    2.60    3.30
 -11  11  -1   -2.60    5.40
 -11  11  -1    5.20    3.10
 -11  11  -1  -10.30    7.30
 -12  11  -1   69.09   13.10
 -12  11  -1   44.60    5.10
 -12  11  -1   40.20    8.30
  10  10  -1   42.00   12.00
  10  10  -1   23.50   12.70
 -10 -10   1   36.40   12.30
 -10 -10   1   49.40   15.40
 -10 -10   1   53.99   13.10
   9  10  -1   31.50   11.20
   9  10  -1   44.60   14.20
   9  10  -1   53.69   16.20
  -9 -10   1   34.20   13.20
  -9 -10   1   49.30   15.20
  -9 -10   1   50.49   12.70
   8  10  -1    1.00    5.80
   8  10  -1    2.50    8.80
   8  10  -1   -6.20    3.30
   8  10  -1   -4.90    6.50
   8  10  -1   11.40   10.50
  -8 -10   1    6.40   11.30
  -8 -10   1   11.90    9.60
  -8 -10   1    4.90    9.90
  -8 -10   1   -3.00    9.80
   7  10  -1    3.90    7.80
   7  10  -1   12.80   12.40
   7  10  -1    4.40    5.70
   7  10  -1    1.50    2.10
   7  10  -1   -2.80    3.90
   7  10  -1   -2.20    8.40
  -7 -10   1   -5.90    8.10
  -7 -10   1   11.30   10.80
  -7 -10   1   10.90   13.20
  -7 -10   1    1.60    4.40
   6  10  -1   14.70    3.50
   6  10  -1   17.90    3.50
   6  10  -1   21.90    7.90
   6  10  -1   19.30    8.30
   6  10  -1   14.50   11.10
   6  10  -1   26.20   11.40
   6  10  -1   18.00    9.30
   6  10  -1   18.80    4.00
  -6 -10   1    4.40    9.50
  -6 -10   1    9.70    9.40
  -6 -10   1   23.50    8.70
  -6 -10   1   21.60    9.60
  -6 -10   1   17.70    9.00
  -6 -10   1   16.60    8.40
   5  10  -1   37.10    9.10
   5  10  -1   36.90    4.50
   5  10  -1   25.30    5.20
   5  10  -1   50.99    9.80
   5  10  -1   29.00    9.40
   5  10  -1   42.60   12.90
   5  10  -1   32.80   10.90
  -5 -10   1   33.60    9.40
  -5 -10   1   36.30    9.30
  -5 -10   1   13.70   10.10
  -5 -10   1   28.10   10.30
  -5 -10   1   29.30   10.90
  -5 -10   1   32.10   10.80
   4  10  -1   -3.00    8.20
   4  10  -1   -6.60    5.40
   4  10  -1    1.90    6.10
   4  10  -1    9.40    8.40
   4  10  -1    1.10    6.50
  -4 -10   1    5.40    7.50
  -4 -10   1   -2.40    6.80
  -4 -10   1    6.10    4.30
  -4 -10   1    2.00    8.10
  -4 -10   1    2.60    5.90
  -4 -10   1   -3.10    5.30
   3  10  -1   61.79   13.90
   3  10  -1   43.90    9.30
   3  10  -1   47.70   10.20
   3  10  -1   51.39   11.10
  -3 -10   1   33.80    9.30
  -3 -10   1   59.19    8.30
  -3 -10   1   34.00   11.30
  -3 -10   1   50.59   10.60
  -3 -10   1   56.39    8.70
   2  10  -1   10.90    6.40
   2  10  -1   12.30    8.30
   2  10  -1    7.70    7.20
  -2 -10   1   -2.70    6.20
  -2 -10   1    2.80    3.90
  -2 -10   1    1.00    6.40
  -2 -10   1   11.40    8.80
  -2 -10   1   11.30    7.40
  -2 -10   1    5.90    5.20
   1  10  -1   85.09   12.90
   1  10  -1   97.89   12.80
   1  10  -1   89.19   10.80
   1  10  -1   98.29   15.30
  -1 -10   1  106.99   12.60
  -1 -10   1   99.49   12.30
  -1 -10   1  116.39   13.80
  -1 -10   1   86.09    9.70
  -1 -10   1   91.29   14.30
   0  10  -1    2.10    5.70
   0  10  -1    5.00    6.30
   0  10  -1   -4.70    4.80
   0  10  -1  -10.60    6.50
   0 -10   1   -3.10    6.30
   0 -10   1    0.40    5.40
   0 -10   1   11.10    7.70
   0 -10   1   -1.50    6.20
   0 -10   1    2.40    6.20
   0 -10   1   -1.70    3.80
  -1  10  -1  141.79   12.90
  -1  10  -1  115.99   14.90
  -1  10  -1  127.99   13.80
  -1  10  -1  128.99   13.30
   1 -10   1  148.99   15.40
   1 -10   1  129.49   13.00
   1 -10   1  114.69   12.00
   1 -10   1  149.99   11.60
   1 -10   1  112.49   13.80
   1 -10   1  137.09   13.60
   1 -10   1  117.79   15.20
  -2  10  -1  391.26   24.40
  -2  10  -1  374.66   22.70
  -2  10  -1  402.66   27.70
  -2  10  -1  374.66   23.40
  -2  10  -1  363.46   25.10
  -2  10  -1  370.96   25.00
   2 -10   1  361.46   25.50
   2 -10   1  326.97   24.80
   2 -10   1  385.06   24.70
   2 -10   1  371.36   23.10
   2 -10   1  349.57   27.70
   2 -10   1  385.96   23.10
   2 -10   1  336.57   26.50
   2 -10   1  371.16   24.50
  -3  10  -1   34.60    7.80
  -3  10  -1   41.80    7.30
  -3  10  -1   34.30    7.30
  -3  10  -1   51.09   10.30
  -3  10  -1   47.30    7.60
  -3  10  -1   32.90    5.60
   3 -10   1   36.70    8.30
   3 -10   1   21.20    9.00
   3 -10   1   31.20    7.20
   3 -10   1   46.70    6.50
   3 -10   1   41.40    7.00
   3 -10   1   38.20    6.50
   3 -10   1   38.70    7.70
   3 -10   1   31.00   10.80
  -4  10  -1  107.79   11.40
  -4  10  -1   96.59   10.80
  -4  10  -1   83.89    9.40
  -4  10  -1  116.79   11.20
  -4  10  -1   74.69   11.80
  -4  10  -1   90.19    8.80
   4 -10   1   93.89   13.00
   4 -10   1   79.29    7.20
   4 -10   1   92.09    9.50
   4 -10   1   91.29    7.40
   4 -10   1   81.79   15.70
   4 -10   1   80.29   14.30
   4 -10   1   75.19   13.80
   4 -10   1   93.69   11.00
   4 -10   1   87.29   14.50
   4 -10   1   97.09    9.70
   4 -10   1   97.39   12.10
  -5  10  -1  253.97   16.80
  -5  10  -1  263.87   19.90
  -5  10  -1  245.58   16.20
  -5  10  -1  240.88   17.50
  -5  10  -1  218.48   17.60
  -5  10  -1  236.28   20.20
  -5  10  -1  281.67   19.00
   5 -10   1  247.98   21.70
   5 -10   1  249.48   17.40
   5 -10   1  236.28   22.80
   5 -10   1  231.98   17.20
   5 -10   1  220.88   22.90
   5 -10   1  222.78   23.30
   5 -10   1  225.08   27.60
   5 -10   1  228.78   24.40
  -6  10  -1   53.09    9.40
  -6  10  -1   58.09    8.30
  -6  10  -1   51.09    6.90
  -6  10  -1   30.10    6.80
  -6  10  -1   49.00    9.40
  -6  10  -1   46.00    6.60
  -6  10  -1   37.70    9.30
   6 -10   1   54.29   14.50
   6 -10   1   53.09    6.10
   6 -10   1   50.39    6.40
   6 -10   1   52.49   12.20
   6 -10   1   57.19   12.80
   6 -10   1   39.10   12.70
   6 -10   1   48.50   15.40
   6 -10   1   56.79   13.90
  -7  10  -1  217.38   18.90
  -7  10  -1  212.48   15.90
  -7  10  -1  195.58   19.40
  -7  10  -1  235.38   20.20
  -7  10  -1  250.97   24.00
  -7  10  -1  213.08   17.10
  -7  10  -1  231.58   15.20
  -7  10  -1  252.17   16.20
  -7  10  -1  184.88   18.60
  -7  10  -1  218.58   18.70
  -7  10  -1  236.28   17.70
   7 -10   1  196.38   23.10
   7 -10   1  244.98   25.40
   7 -10   1  231.38   25.50
   7 -10   1  206.18   23.60
   7 -10   1  188.78   25.00
   7 -10   1  245.28   23.60
  -8  10  -1  199.48   17.80
  -8  10  -1  179.18   17.30
  -8  10  -1  164.68   12.70
  -8  10  -1  198.68   22.30
  -8  10  -1  190.48   12.70
  -8  10  -1  190.58   13.50
  -8  10  -1  177.08   18.20
  -8  10  -1  172.68   17.70
  -8  10  -1  174.18   14.40
  -8  10  -1  166.38   13.70
  -8  10  -1  187.28   17.70
   8 -10   1  160.38   24.70
   8 -10   1  200.38   23.50
   8 -10   1  188.88   25.60
   8 -10   1  221.38   27.80
   8 -10   1  157.68   26.00
  -9  10  -1  178.98   19.10
  -9  10  -1  174.78   21.60
  -9  10  -1  211.88   15.70
  -9  10  -1  189.08   19.60
  -9  10  -1  183.88   18.80
  -9  10  -1  177.68   13.00
  -9  10  -1  162.98   12.10
   9 -10   1  162.18   25.40
   9 -10   1  160.88   25.70
   9 -10   1  179.38   42.10
   9 -10   1  228.08   30.00
   9 -10   1  167.28   24.60
 -10  10  -1    0.70    5.20
 -10  10  -1   -0.60    6.80
 -10  10  -1    5.90    3.50
 -10  10  -1    2.30    2.80
 -10  10  -1    2.30    9.20
 -11  10  -1   48.40    5.20
 -11  10  -1   51.49    9.40
 -11  10  -1   45.90   11.50
 -11  10  -1   43.60    5.30
 -12  10  -1   22.50    8.00
 -12  10  -1   38.50   10.00
  11   9  -1   54.99   16.90
  11   9  -1   65.69   15.70
  11   9  -1   49.70   12.30
 -11  -9   1   76.09   17.10
 -11  -9   1   81.59   15.70
  10   9  -1   62.49   17.20
  10   9  -1   70.29   16.50
  10   9  -1   72.89   13.90
 -10  -9   1   54.79   15.40
 -10  -9   1   93.79   13.50
 -10  -9   1   71.59   14.20
 -10  -9   1  102.09   17.00
 -10  -9   1   66.69   13.70
   9   9  -1   -1.30    8.20
   9   9  -1   -7.00    3.40
   9   9  -1    9.40   11.00
   9   9  -1   11.40   11.50
   9   9  -1   -2.10    2.20
  -9  -9   1    4.90    9.90
  -9  -9   1    6.50    9.70
  -9  -9   1    9.40    9.70
   8   9  -1   -7.60    8.70
   8   9  -1   -1.80    1.10
   8   9  -1    3.30    5.60
   8   9  -1   -1.00    2.90
   8   9  -1   12.30    7.00
   8   9  -1    0.60    7.30
   8   9  -1    3.60    9.30
  -8  -9   1    9.20    8.90
  -8  -9   1   27.50   12.50
  -8  -9   1   24.20   10.80
  -8  -9   1    1.10    9.30
   7   9  -1  125.89   17.50
   7   9  -1  163.08   17.90
   7   9  -1  129.59    9.90
   7   9  -1  122.59   14.90
   7   9  -1  129.09   13.50
   7   9  -1  192.88   27.30
  -7  -9   1  165.08   19.30
  -7  -9   1  142.59   17.60
  -7  -9   1  111.59   15.60
  -7  -9   1  130.89   18.70
   6   9  -1   38.10   10.30
   6   9  -1   32.40    8.40
   6   9  -1   27.70    4.00
   6   9  -1   25.70    3.80
   6   9  -1   41.50   11.60
   6   9  -1   28.10    4.40
   6   9  -1   38.80    9.40
   6   9  -1   53.19   12.70
  -6  -9   1   46.60   12.80
  -6  -9   1    7.20    9.60
  -6  -9   1   24.00    9.50
  -6  -9   1   15.10    8.70
  -6  -9   1   36.80   12.00
  -6  -9   1   30.50    8.70
   5   9  -1   43.90    9.80
   5   9  -1   69.39   10.50
   5   9  -1   59.69    6.10
   5   9  -1   42.10    6.00
   5   9  -1   72.59   11.70
   5   9  -1   49.80   12.60
   5   9  -1   61.29   12.00
  -5  -9   1   50.69   10.40
  -5  -9   1   44.40   10.10
  -5  -9   1   57.69   11.50
  -5  -9   1   65.39   13.30
  -5  -9   1   61.79   11.60
  -5  -9   1   57.49   13.10
   4   9  -1    1.40    9.90
   4   9  -1   17.80    7.40
   4   9  -1   19.60    9.20
   4   9  -1    9.30    7.20
   4   9  -1   32.80    8.60
  -4  -9   1   12.30    9.20
  -4  -9   1   24.10    9.30
  -4  -9   1    7.40    7.50
  -4  -9   1   22.90    7.50
  -4  -9   1   11.60    8.30
  -4  -9   1   10.30    7.40
   3   9  -1  114.79   13.60
   3   9  -1  139.09   18.30
   3   9  -1  137.09   15.00
   3   9  -1  130.59   14.90
  -3  -9   1  126.79   12.00
  -3  -9   1  100.29   13.20
  -3  -9   1  133.19   14.30
  -3  -9   1  138.79   17.20
  -3  -9   1  130.79   15.30
  -3  -9   1  130.09   12.50
   2   9  -1   37.30   10.70
   2   9  -1   22.00    7.90
   2   9  -1   19.90    6.70
   2   9  -1   35.50    8.50
  -2  -9   1   20.80    7.10
  -2  -9   1   26.10    8.10
  -2  -9   1   24.90    7.70
  -2  -9   1   26.80    5.80
  -2  -9   1   24.30    5.10
   1   9  -1  173.58   16.30
   1   9  -1  191.58   16.60
   1   9  -1  224.78   16.00
   1   9  -1  208.88   18.90
  -1  -9   1  210.38   16.80
  -1  -9   1  208.08   14.60
  -1  -9   1  197.08   15.90
  -1  -9   1  201.88   16.70
  -1  -9   1  173.98   17.60
  -1  -9   1  186.38   12.20
   0   9  -1  114.09   14.20
   0   9  -1   92.59   11.80
   0  -9   1  115.49   11.50
   0  -9   1  112.69   12.10
   0  -9   1   97.89   11.40
   0  -9   1  125.39   10.10
   0  -9   1  108.69   13.80
  -1   9  -1  773.92   44.90
  -1   9  -1  729.03   41.80
  -1   9  -1  740.53   43.00
  -1   9  -1  634.24   41.90
   1  -9   1  709.23   43.30
   1  -9   1  773.02   42.50
   1  -9   1  667.13   43.90
   1  -9   1  670.53   42.10
   1  -9   1  786.32   40.80
   1  -9   1  710.83   43.50
  -2   9  -1  357.76   24.50
  -2   9  -1  328.67   22.10
  -2   9  -1  308.37   22.10
  -2   9  -1  300.37   20.90
  -2   9  -1  343.77   20.10
  -2   9  -1  342.77   20.80
   2  -9   1  335.27   21.50
   2  -9   1  326.37   20.70
   2  -9   1  312.37   20.70
   2  -9   1  295.67   24.40
   2  -9   1  320.37   24.10
   2  -9   1  316.47   22.50
   2  -9   1  352.06   20.50
  -3   9  -1  101.79   12.10
  -3   9  -1  106.19    8.60
  -3   9  -1   90.49   10.20
  -3   9  -1   84.09    9.10
  -3   9  -1   92.39    9.60
  -3   9  -1   91.09    9.80
   3  -9   1   79.09    8.30
   3  -9   1  111.59    9.20
   3  -9   1   85.49   10.40
   3  -9   1   93.69    9.60
   3  -9   1   80.29   13.00
   3  -9   1  101.29   15.50
   3  -9   1   84.79    8.70
   3  -9   1  104.59   12.00
  -4   9  -1  323.47   24.60
  -4   9  -1  402.06   23.90
  -4   9  -1  398.36   23.20
  -4   9  -1  354.16   23.80
  -4   9  -1  380.66   24.20
  -4   9  -1  440.86   22.80
   4  -9   1  341.57   25.90
   4  -9   1  393.76   24.00
   4  -9   1  381.76   23.30
   4  -9   1  366.26   25.40
   4  -9   1  326.47   28.60
   4  -9   1  384.56   28.10
   4  -9   1  337.17   27.80
   4  -9   1  327.67   27.20
   4  -9   1  383.56   23.20
  -5   9  -1  108.49   10.90
  -5   9  -1  117.79   11.40
  -5   9  -1  131.89   10.20
  -5   9  -1  120.49   11.90
  -5   9  -1  133.49   11.10
  -5   9  -1  112.39   12.20
  -5   9  -1  139.89   16.00
  -5   9  -1  117.39   10.10
  -5   9  -1  121.89   12.40
  -5   9  -1  127.09   12.20
   5  -9   1  111.09   15.10
   5  -9   1  148.59   19.20
   5  -9   1  121.39   11.20
   5  -9   1  124.09   17.60
   5  -9   1  149.88   19.10
   5  -9   1  162.78   21.70
   5  -9   1  106.99   10.20
   5  -9   1  136.19   16.90
  -6   9  -1   68.89   14.10
  -6   9  -1   38.70    7.90
  -6   9  -1   54.29    6.40
  -6   9  -1   41.70    8.20
  -6   9  -1   45.00    6.40
  -6   9  -1   25.10    6.00
  -6   9  -1   39.80    9.10
  -6   9  -1   40.10    6.60
  -6   9  -1   45.10    8.80
  -6   9  -1   48.00    9.20
   6  -9   1   48.90   12.00
   6  -9   1   47.70   13.80
   6  -9   1   38.40    4.10
   6  -9   1   33.80   11.90
   6  -9   1   46.10   15.10
   6  -9   1   57.39   13.30
   6  -9   1   37.80   11.80
   6  -9   1   42.00    4.30
  -7   9  -1   -0.20    4.90
  -7   9  -1   -3.60    3.50
  -7   9  -1   -0.60    3.70
  -7   9  -1    4.80    5.00
  -7   9  -1    6.40    9.00
  -7   9  -1   13.00    7.50
  -7   9  -1    0.40    3.10
  -7   9  -1    2.10    5.90
  -7   9  -1    3.70    5.70
  -7   9  -1   -3.20    3.70
  -7   9  -1   -5.10    5.80
  -7   9  -1   -6.30    6.10
   7  -9   1  -12.90    8.50
   7  -9   1   -9.10    8.40
   7  -9   1    7.10    9.70
   7  -9   1   11.70   10.70
   7  -9   1   13.80    9.70
   7  -9   1    1.00    9.10
  -8   9  -1    6.20    7.00
  -8   9  -1    0.20    3.00
  -8   9  -1    0.80    3.50
  -8   9  -1   -8.40    7.10
  -8   9  -1    5.80    3.10
  -8   9  -1    2.50    4.70
  -8   9  -1    9.20    7.50
  -8   9  -1    7.60    3.20
  -8   9  -1   -8.80    7.30
  -8   9  -1    2.30    6.40
   8  -9   1    7.70   11.40
   8  -9   1   17.00   11.20
   8  -9   1   21.90   12.20
   8  -9   1    3.00    9.60
   8  -9   1   -7.00    9.30
  -9   9  -1   45.20   12.00
  -9   9  -1   56.09    5.40
  -9   9  -1   31.80   10.30
  -9   9  -1   45.80   14.20
  -9   9  -1   52.79    8.30
  -9   9  -1   72.69   20.90
  -9   9  -1   55.79    6.10
  -9   9  -1   69.79   12.50
  -9   9  -1   65.59   11.40
   9  -9   1   55.79   15.80
   9  -9   1   64.19   18.00
 -10   9  -1  226.88   20.90
 -10   9  -1  229.08   18.40
 -10   9  -1  230.18   13.70
 -10   9  -1  235.08   24.50
 -10   9  -1  205.28   22.60
 -10   9  -1  231.38   14.10
 -11   9  -1    2.60    6.60
 -11   9  -1    9.10    2.20
 -11   9  -1    2.50    2.10
 -11   9  -1    1.90    6.10
 -12   9  -1   53.19   10.40
 -12   9  -1   71.49   13.80
 -13   9  -1   23.90    8.80
 -13   9  -1   -0.30    7.20
  11   8  -1   24.40   10.80
  11   8  -1   64.59   25.70
  11   8  -1   12.10   13.20
 -11  -8   1   35.90   12.70
 -11  -8   1   35.60   11.30
 -11  -8   1   32.50   13.70
  10   8  -1  -12.70   10.80
  10   8  -1    0.00    7.20
  10   8  -1   -8.70    9.70
 -10  -8   1   19.80   10.90
 -10  -8   1   16.00    7.80
 -10  -8   1    3.30   10.20
 -10  -8   1   11.90    9.70
   9   8  -1   -0.70    1.70
   9   8  -1   -2.50    4.30
   9   8  -1   11.50   10.30
   9   8  -1    0.40    1.90
   9   8  -1   -3.20   10.00
   9   8  -1   -1.10    7.80
   9   8  -1   -0.20    1.70
  -9  -8   1    1.70    8.90
  -9  -8   1    5.00    8.50
  -9  -8   1   -1.00    8.80
  -9  -8   1   17.00    7.20
   8   8  -1    2.00    6.80
   8   8  -1    9.20    9.70
   8   8  -1   -1.90    3.40
   8   8  -1   -1.90    5.50
   8   8  -1    6.20    9.30
   8   8  -1   -7.00    3.60
  -8  -8   1    3.00    7.00
  -8  -8   1   -7.60    8.00
  -8  -8   1   -8.50    6.60
  -8  -8   1   -9.10    8.00
  -8  -8   1   12.10   10.20
  -8  -8   1    3.70    8.90
  -8  -8   1   -7.10    7.20
   7   8  -1  392.66   32.30
   7   8  -1  450.15   26.60
   7   8  -1  493.95   32.70
   7   8  -1  507.55   34.30
   7   8  -1  435.16   34.80
   7   8  -1  466.95   30.00
  -7  -8   1  445.36   31.20
  -7  -8   1  439.26   31.70
  -7  -8   1  429.16   33.70
   6   8  -1  238.98   20.50
   6   8  -1  237.28   19.10
   6   8  -1  214.78   20.00
   6   8  -1  199.78   13.00
   6   8  -1  233.38   23.70
   6   8  -1  217.08   12.70
   6   8  -1  250.37   21.50
   6   8  -1  222.98   17.70
   6   8  -1  224.38   14.50
  -6  -8   1  210.38   21.00
  -6  -8   1  254.87   20.70
  -6  -8   1  255.77   21.30
  -6  -8   1  214.18   22.80
  -6  -8   1  225.58   20.40
  -6  -8   1  215.88   18.80
   5   8  -1  224.18   18.70
   5   8  -1  217.78   13.90
   5   8  -1  253.97   18.00
   5   8  -1  230.08   19.60
   5   8  -1  225.88   21.70
   5   8  -1  236.18   18.80
   5   8  -1  195.78   13.80
  -5  -8   1  222.98   21.70
  -5  -8   1  193.88   18.30
  -5  -8   1  210.58   19.30
  -5  -8   1  219.98   21.20
  -5  -8   1  188.28   18.70
  -5  -8   1  218.08   19.10
   4   8  -1  143.89   14.30
   4   8  -1  141.89   13.60
   4   8  -1  175.48   16.10
   4   8  -1  129.19   14.20
   4   8  -1  184.98   18.40
  -4  -8   1  182.28   16.40
  -4  -8   1  155.98   14.80
  -4  -8   1  148.69   14.20
  -4  -8   1  140.89   16.20
  -4  -8   1  150.68   15.10
   3   8  -1  218.68   18.20
   3   8  -1  218.78   16.70
   3   8  -1  217.28   17.20
  -3  -8   1  210.58   17.90
  -3  -8   1  179.38   16.40
  -3  -8   1  238.98   18.20
  -3  -8   1  220.68   15.90
  -3  -8   1  201.08   18.70
   2   8  -1  103.89   12.10
   2   8  -1  130.79   12.60
   2   8  -1  118.69   14.60
   2   8  -1  107.29   12.10
  -2  -8   1  115.39   10.40
  -2  -8   1  105.89   13.50
  -2  -8   1  102.79    9.50
  -2  -8   1  118.79   12.50
  -2  -8   1  117.49   12.30
  -2  -8   1  111.99   11.50
   1   8  -1  165.28   14.70
   1   8  -1  169.28   13.70
   1   8  -1  161.88   16.30
   1   8  -1  157.38   14.20
  -1  -8   1  174.08   12.60
  -1  -8   1  161.18   15.70
  -1  -8   1  168.98   10.90
  -1  -8   1  176.38   14.80
  -1  -8   1  174.28   13.80
  -1  -8   1  156.28   14.10
   0   8  -1   11.60    7.20
   0   8  -1   13.40    5.50
   0   8  -1   13.40    5.90
   0  -8   1    8.50    4.90
   0  -8   1    5.60    6.30
   0  -8   1    7.70    5.20
   0  -8   1   10.30    5.70
   0  -8   1    8.50    3.90
  -1   8  -1  475.45   30.10
  -1   8  -1  551.24   31.60
  -1   8  -1  525.75   32.90
  -1   8  -1  474.35   30.80
   1  -8   1  500.75   32.00
   1  -8   1  490.05   30.70
   1  -8   1  542.05   31.00
   1  -8   1  492.55   30.20
   1  -8   1  479.75   32.40
   1  -8   1  556.94   29.50
   1  -8   1  498.15   31.90
  -2   8  -1  632.64   36.00
  -2   8  -1  597.64   34.60
  -2   8  -1  598.14   34.40
  -2   8  -1  590.54   33.50
  -2   8  -1  672.43   37.50
  -2   8  -1  620.44   35.50
   2  -8   1  606.84   34.60
   2  -8   1  570.04   34.20
   2  -8   1  610.04   33.90
   2  -8   1  568.44   34.90
   2  -8   1  542.85   36.90
   2  -8   1  603.14   34.80
   2  -8   1  581.54   35.80
  -3   8  -1    6.70    3.20
  -3   8  -1    2.40    3.60
  -3   8  -1    3.40    5.70
  -3   8  -1    3.70    4.10
  -3   8  -1    3.30    4.00
  -3   8  -1   10.00    4.80
   3  -8   1    0.60    4.90
   3  -8   1    5.20    3.30
   3  -8   1    2.30    4.20
   3  -8   1    4.30    6.80
   3  -8   1    2.80    5.00
   3  -8   1   -1.20    7.50
   3  -8   1    6.10    3.60
   3  -8   1    9.50    4.50
   3  -8   1    8.00    6.40
   3  -8   1    9.70    3.60
  -4   8  -1   26.30    6.70
  -4   8  -1   26.70    5.50
  -4   8  -1   23.10    6.20
  -4   8  -1   50.99   10.50
  -4   8  -1   31.90    5.90
  -4   8  -1   33.70    4.80
  -4   8  -1   32.70    5.10
  -4   8  -1   40.80    6.20
   4  -8   1   23.80    9.00
   4  -8   1   23.40   10.00
   4  -8   1   24.20    5.00
   4  -8   1   31.40    5.80
   4  -8   1   23.80    7.30
   4  -8   1   32.40    9.20
   4  -8   1   18.70    6.90
   4  -8   1   26.40    8.30
  -5   8  -1    1.60    4.20
  -5   8  -1    1.80    3.40
  -5   8  -1    4.30    3.80
  -5   8  -1    7.90    4.80
  -5   8  -1    0.40    4.90
  -5   8  -1    8.20    7.50
  -5   8  -1    2.10    3.20
  -5   8  -1    5.90    5.20
  -5   8  -1    1.50    3.00
  -5   8  -1    3.40    6.60
  -5   8  -1    2.20    4.90
   5  -8   1    0.90    6.70
   5  -8   1    0.50    3.60
   5  -8   1   -5.70    7.80
   5  -8   1   -7.20    6.20
   5  -8   1   -1.20    4.50
   5  -8   1    7.90    7.20
   5  -8   1    0.90    7.10
   5  -8   1    1.00    3.30
   5  -8   1    8.70    8.20
  -6   8  -1  204.28   14.40
  -6   8  -1  176.38   16.80
  -6   8  -1  214.88   20.50
  -6   8  -1  179.88   14.40
  -6   8  -1  214.48   16.70
  -6   8  -1  207.68   13.50
  -6   8  -1  194.08   13.60
  -6   8  -1  200.98   16.50
  -6   8  -1  175.78   16.40
  -6   8  -1  217.08   19.50
  -6   8  -1  184.68   15.80
  -6   8  -1  212.18   12.90
   6  -8   1  201.78   21.20
   6  -8   1  203.48   20.50
   6  -8   1  184.08   22.00
   6  -8   1  187.68   20.70
   6  -8   1  197.68   21.60
   6  -8   1  190.98   20.20
  -7   8  -1    3.50    3.30
  -7   8  -1    3.70    3.50
  -7   8  -1    1.80    7.30
  -7   8  -1   -0.10    6.00
  -7   8  -1    5.40    4.70
  -7   8  -1   12.80    7.70
  -7   8  -1   10.30    9.20
  -7   8  -1   -0.10    3.70
  -7   8  -1    3.70    2.80
  -7   8  -1   11.20    6.70
  -7   8  -1   -0.30    2.30
  -7   8  -1    2.00    6.70
  -7   8  -1    6.60    8.80
  -7   8  -1    3.00    6.40
   7  -8   1    6.70   11.00
   7  -8   1    8.40   10.60
   7  -8   1  -10.50    8.00
   7  -8   1   15.60   10.10
   7  -8   1   17.70   10.70
   7  -8   1    2.80    9.10
  -8   8  -1    2.00    3.20
  -8   8  -1    6.40    4.80
  -8   8  -1   -0.90    6.70
  -8   8  -1  -17.50    6.60
  -8   8  -1    7.70    6.00
  -8   8  -1    3.30    7.80
  -8   8  -1   -1.30    7.30
  -8   8  -1    3.50   10.10
  -8   8  -1   -0.60    7.80
  -8   8  -1  -17.00    8.20
  -8   8  -1    4.20    2.50
  -8   8  -1   -0.20    6.70
  -8   8  -1   -1.40    5.50
   8  -8   1    3.30    9.40
   8  -8   1   -5.50    9.60
   8  -8   1    2.30   10.70
   8  -8   1    5.60    9.90
   8  -8   1    2.50    9.30
  -9   8  -1    4.30    2.10
  -9   8  -1    7.10    7.30
  -9   8  -1    3.00    2.60
  -9   8  -1   -1.40    7.60
  -9   8  -1   12.00    9.80
  -9   8  -1   -3.10    6.00
  -9   8  -1   -5.90    7.20
  -9   8  -1    0.50    5.90
  -9   8  -1    7.30    7.00
  -9   8  -1    5.50    9.00
  -9   8  -1    0.00    5.10
 -10   8  -1    7.00    8.70
 -10   8  -1   12.30    6.60
 -10   8  -1    2.80    5.80
 -10   8  -1    2.40    2.00
 -10   8  -1   -2.80    7.10
 -10   8  -1    1.60    1.80
 -10   8  -1   -2.70    9.20
 -11   8  -1   14.40    8.00
 -11   8  -1    0.20    6.40
 -12   8  -1   -3.90    7.00
 -12   8  -1   -2.10    6.80
 -13   8  -1   14.90    7.60
  11   7  -1   16.90    9.90
  11   7  -1   28.30   14.70
  11   7  -1   13.90   11.40
 -11  -7   1    9.30    9.00
 -11  -7   1   41.80   13.00
 -11  -7   1   22.40    9.80
 -11  -7   1   14.80   11.00
 -11  -7   1   25.80   10.00
  10   7  -1    2.10    9.00
  10   7  -1   -2.80   10.90
  10   7  -1   16.80    8.50
  10   7  -1   -5.60    4.80
 -10  -7   1   13.60   10.00
 -10  -7   1   17.80    9.90
 -10  -7   1    8.60    9.30
 -10  -7   1    6.10    8.80
 -10  -7   1   12.80    8.10
   9   7  -1    4.70    4.10
   9   7  -1   -5.90    9.40
   9   7  -1   -0.70    9.70
   9   7  -1    0.00    3.70
   9   7  -1    4.00    8.20
  -9  -7   1   -6.60    7.50
  -9  -7   1   -8.10    7.40
  -9  -7   1    6.10    7.10
  -9  -7   1   -7.70    7.50
  -9  -7   1   -3.50    5.90
   8   7  -1   67.39   11.90
   8   7  -1   85.29   13.00
   8   7  -1   64.29   13.70
   8   7  -1   71.49    8.60
  -8  -7   1   87.59   13.00
  -8  -7   1   98.49   18.90
  -8  -7   1   59.69   15.80
  -8  -7   1   80.29   12.90
  -8  -7   1   87.89   13.20
   7   7  -1  160.68   13.60
   7   7  -1  164.08   16.20
   7   7  -1  159.48   18.30
   7   7  -1  149.59   11.80
   7   7  -1  154.18   18.90
   7   7  -1  152.88   14.40
  -7  -7   1  165.18   17.00
  -7  -7   1  152.88   17.20
  -7  -7   1  171.08   17.50
  -7  -7   1  139.19   17.20
  -7  -7   1  158.88   16.00
  -7  -7   1  122.39   19.40
   6   7  -1  186.88   15.30
   6   7  -1  198.78   18.70
   6   7  -1  195.48   12.90
   6   7  -1  206.38   18.60
   6   7  -1  166.48   17.70
   6   7  -1  177.88   16.20
  -6  -7   1  180.68   17.30
  -6  -7   1  153.08   17.70
  -6  -7   1  207.48   17.90
  -6  -7   1  170.78   18.00
  -6  -7   1  176.98   20.70
  -6  -7   1  187.38   16.80
   5   7  -1  132.99   13.00
   5   7  -1  146.09    9.70
   5   7  -1  154.98   10.40
   5   7  -1  149.79   14.40
   5   7  -1  149.39   14.90
   5   7  -1  124.39   14.60
   5   7  -1  148.29   17.10
  -5  -7   1  128.89   15.80
  -5  -7   1  148.69   17.50
  -5  -7   1  175.88   16.00
  -5  -7   1  151.48   15.00
  -5  -7   1  137.39   14.80
  -5  -7   1  129.89   14.40
   4   7  -1  408.66   25.10
   4   7  -1  430.86   27.40
   4   7  -1  417.16   28.60
   4   7  -1  342.47   25.30
   4   7  -1  331.77   25.00
   4   7  -1  371.06   22.10
  -4  -7   1  390.16   26.10
  -4  -7   1  388.46   26.10
  -4  -7   1  380.16   27.50
  -4  -7   1  424.26   26.00
  -4  -7   1  370.46   25.50
   3   7  -1  162.68   13.40
   3   7  -1  165.18   16.40
   3   7  -1  177.68   15.10
   3   7  -1  178.18   14.30
  -3  -7   1  168.08   14.50
  -3  -7   1  175.88   13.60
  -3  -7   1  164.88   15.80
  -3  -7   1  140.69   13.70
   2   7  -1  836.32   45.90
   2   7  -1  849.61   46.90
   2   7  -1  807.82   47.10
   2   7  -1  749.23   48.20
  -2  -7   1  807.92   44.60
  -2  -7   1  814.22   46.50
  -2  -7   1  792.62   47.90
  -2  -7   1  775.12   46.60
  -2  -7   1  763.32   45.80
   1   7  -1  293.97   20.00
   1   7  -1  260.57   19.40
   1   7  -1  279.17   18.70
   1   7  -1  290.47   21.50
  -1  -7   1  318.37   20.00
  -1  -7   1  279.37   16.70
  -1  -7   1  257.57   20.60
  -1  -7   1  271.27   18.90
  -1  -7   1  285.97   17.70
  -1  -7   1  271.97   19.50
   0   7  -1  598.24   38.30
   0   7  -1  570.04   36.70
   0   7  -1  650.63   37.40
   0   7  -1  618.84   36.20
   0  -7   1  577.44   36.70
   0  -7   1  617.34   36.70
   0  -7   1  661.23   36.60
   0  -7   1  637.64   33.30
   0  -7   1  687.03   35.50
   0  -7   1  650.83   38.30
  -1   7  -1  815.32   47.50
  -1   7  -1  823.22   46.50
  -1   7  -1  934.31   48.90
  -1   7  -1  856.71   49.50
  -1   7  -1  791.22   47.90
   1  -7   1  848.32   49.90
   1  -7   1  843.32   49.00
   1  -7   1  892.81   48.00
   1  -7   1  922.71   46.80
   1  -7   1  920.81   47.70
   1  -7   1  776.82   48.60
   1  -7   1  794.42   47.80
  -2   7  -1  544.35   32.60
  -2   7  -1  580.04   34.10
  -2   7  -1  572.14   33.10
  -2   7  -1  592.74   32.20
  -2   7  -1  534.65   32.00
  -2   7  -1  582.94   31.20
   2  -7   1  600.84   32.60
   2  -7   1  457.55   34.70
   2  -7   1  553.34   31.40
   2  -7   1  589.24   32.70
   2  -7   1  588.94   31.80
   2  -7   1  489.25   34.40
   2  -7   1  557.34   32.10
  -3   7  -1  160.38   11.50
  -3   7  -1  174.58   12.70
  -3   7  -1  175.88   11.40
  -3   7  -1  204.08   16.00
  -3   7  -1  178.08   13.70
  -3   7  -1  155.08   12.20
  -3   7  -1  194.68   14.00
   3  -7   1  165.68   12.10
   3  -7   1  179.08   15.60
   3  -7   1  175.38   10.80
   3  -7   1  154.48   11.60
   3  -7   1  144.19   15.50
   3  -7   1  160.98   14.00
   3  -7   1  165.38   14.00
   3  -7   1  175.08   14.70
   3  -7   1  144.19   16.10
   3  -7   1  164.28   11.60
   3  -7   1  186.08   15.70
   3  -7   1  172.18   10.90
  -4   7  -1   64.79    7.90
  -4   7  -1   60.09    7.90
  -4   7  -1   48.20    7.10
  -4   7  -1   48.70    7.00
  -4   7  -1   64.79    6.80
  -4   7  -1   56.39    5.90
  -4   7  -1   77.29   11.20
  -4   7  -1   56.89    6.30
  -4   7  -1   36.40    6.00
  -4   7  -1   70.49   11.80
   4  -7   1   47.10   10.60
   4  -7   1   50.19    6.30
   4  -7   1   66.29   11.00
   4  -7   1   72.79   13.80
   4  -7   1   58.09    6.60
   4  -7   1   60.79   10.30
   4  -7   1   50.69   11.80
   4  -7   1   66.29   10.80
   4  -7   1   56.39    6.30
  -5   7  -1  979.80   52.09
  -5   7  -1 1002.70   49.30
  -5   7  -1  981.70   55.79
  -5   7  -1  920.61   52.09
  -5   7  -1  872.01   49.40
  -5   7  -1  803.72   49.50
  -5   7  -1  889.61   51.79
  -5   7  -1  881.91   52.09
  -5   7  -1  998.40   55.39
  -5   7  -1 1026.20   50.49
  -5   7  -1  860.31   51.59
  -5   7  -1  867.51   50.29
   5  -7   1  849.22   54.29
   5  -7   1  914.61   57.09
   5  -7   1  849.52   55.89
   5  -7   1  822.72   54.69
   5  -7   1  918.21   55.79
   5  -7   1  908.01   48.30
   5  -7   1  860.51   55.89
   5  -7   1  915.31   48.40
  -6   7  -1   21.00    6.40
  -6   7  -1   11.50    6.50
  -6   7  -1    9.90    7.00
  -6   7  -1    9.20    6.50
  -6   7  -1   17.70    3.40
  -6   7  -1   12.10    3.40
  -6   7  -1   10.60    2.80
  -6   7  -1   13.50    6.40
  -6   7  -1   12.40    8.10
  -6   7  -1   18.00    8.30
  -6   7  -1   11.40    8.70
  -6   7  -1    9.00    4.10
  -6   7  -1    8.60    4.30
  -6   7  -1    7.80    6.60
   6  -7   1    7.60    9.50
   6  -7   1   25.00   10.70
   6  -7   1   13.50    8.50
   6  -7   1    7.90    7.80
   6  -7   1   -1.10    7.40
   6  -7   1   11.90    8.80
  -7   7  -1  339.57   25.10
  -7   7  -1  371.66   28.70
  -7   7  -1  366.36   28.20
  -7   7  -1  346.07   25.00
  -7   7  -1  384.26   29.00
  -7   7  -1  360.16   26.30
  -7   7  -1  373.56   29.30
  -7   7  -1  354.86   25.30
  -7   7  -1  365.06   29.20
  -7   7  -1  360.86   21.70
  -7   7  -1  389.26   20.50
  -7   7  -1  404.56   20.20
  -7   7  -1  396.06   25.50
  -7   7  -1  355.56   28.20
  -7   7  -1  362.46   23.50
  -7   7  -1  361.36   20.00
  -7   7  -1  333.97   25.50
   7  -7   1  326.27   30.30
   7  -7   1  298.77   29.50
   7  -7   1  315.67   29.70
   7  -7   1  346.87   30.20
   7  -7   1  328.77   30.20
   7  -7   1  328.87   29.30
  -8   7  -1  112.99   16.90
  -8   7  -1   87.09   12.60
  -8   7  -1   87.69   15.30
  -8   7  -1   83.79    6.30
  -8   7  -1   83.59   15.80
  -8   7  -1  104.19   16.90
  -8   7  -1  100.29   14.20
  -8   7  -1   81.69   10.40
  -8   7  -1   98.49   16.80
  -8   7  -1   89.59   12.80
  -8   7  -1   98.79   17.50
  -8   7  -1   91.49    6.00
  -8   7  -1  101.09   15.20
  -8   7  -1  116.69   13.50
  -8   7  -1  105.59   12.60
   8  -7   1   89.89   18.50
   8  -7   1  102.19   17.70
   8  -7   1   91.59   17.40
  -9   7  -1   -1.20    5.80
  -9   7  -1   28.00    9.30
  -9   7  -1    1.00    5.50
  -9   7  -1    9.30    9.50
  -9   7  -1    6.80    9.40
  -9   7  -1    3.40    7.00
  -9   7  -1    1.30    8.30
  -9   7  -1    5.10    6.70
  -9   7  -1   10.40    9.20
  -9   7  -1    5.20   14.40
  -9   7  -1   -2.70    6.30
 -10   7  -1    1.40    7.00
 -10   7  -1   12.50    9.40
 -10   7  -1  -11.40    6.50
 -10   7  -1   10.00    9.90
 -10   7  -1   -1.30    5.70
 -10   7  -1   10.30    6.20
 -10   7  -1    7.20    8.80
 -11   7  -1   13.40    7.30
 -11   7  -1   33.90    8.60
 -12   7  -1   78.49   12.80
 -12   7  -1   70.59   11.80
 -13   7  -1   20.60    7.20
 -13   7  -1    1.00    7.20
  12   6  -1    3.40   13.10
  12   6  -1   -2.80    8.90
  12   6  -1    1.50   12.30
 -12  -6   1   -9.00    8.40
 -12  -6   1    5.80   10.50
 -12  -6   1   -0.80    7.80
  11   6  -1  239.38   29.10
  11   6  -1  246.48   26.90
  11   6  -1  235.38   23.00
 -11  -6   1  243.68   22.20
 -11  -6   1  195.58   23.60
 -11  -6   1  229.28   21.60
 -11  -6   1  220.18   22.60
 -11  -6   1  268.27   25.00
  10   6  -1  105.69   18.00
  10   6  -1  114.99   19.20
 -10  -6   1  104.89   16.60
 -10  -6   1  110.19   15.50
 -10  -6   1  105.09   18.00
 -10  -6   1  108.19   14.90
 -10  -6   1  119.09   15.10
   9   6  -1   10.40    7.00
   9   6  -1   17.50    8.30
   9   6  -1    4.90    9.80
   9   6  -1   20.40    5.70
   9   6  -1   34.00   11.80
  -9  -6   1   32.60   10.30
  -9  -6   1   22.80    9.60
  -9  -6   1   27.70    9.40
  -9  -6   1   20.90    9.20
  -9  -6   1    9.20    7.00
  -9  -6   1    5.30    8.00
   8   6  -1  292.87   18.50
   8   6  -1  276.37   26.00
   8   6  -1  297.37   23.10
   8   6  -1  299.47   25.00
   8   6  -1  284.77   19.40
   8   6  -1  321.07   24.00
   8   6  -1  258.47   17.80
   8   6  -1  277.57   25.00
  -8  -6   1  271.87   22.70
  -8  -6   1  309.37   23.90
  -8  -6   1  287.57   24.70
  -8  -6   1  299.27   23.20
  -8  -6   1  321.97   30.40
  -8  -6   1  316.87   22.60
   7   6  -1  551.84   33.20
   7   6  -1  576.64   36.70
   7   6  -1  568.04   38.80
   7   6  -1  563.54   34.60
   7   6  -1  517.95   37.90
   7   6  -1  536.95   33.60
  -7  -6   1  547.15   36.70
  -7  -6   1  605.74   38.40
  -7  -6   1  576.14   42.00
  -7  -6   1  596.74   37.20
  -7  -6   1  634.54   36.70
  -7  -6   1  605.84   39.30
   6   6  -1   23.90    8.90
   6   6  -1   21.10    8.10
   6   6  -1   22.20    4.60
   6   6  -1   34.10    7.10
   6   6  -1   18.40    7.10
   6   6  -1   15.80    8.60
  -6  -6   1   17.50    7.80
  -6  -6   1   14.50    8.10
  -6  -6   1   24.10    7.70
  -6  -6   1   25.10   11.50
  -6  -6   1   39.70    8.70
  -6  -6   1   15.50    9.00
   5   6  -1  297.17   20.10
   5   6  -1  284.17   20.70
   5   6  -1  269.07   21.70
   5   6  -1  316.87   24.00
   5   6  -1  302.07   17.00
   5   6  -1  319.07   18.40
   5   6  -1  299.47   22.00
  -5  -6   1  313.47   25.00
  -5  -6   1  285.07   21.30
  -5  -6   1  337.47   24.30
  -5  -6   1  303.17   22.00
  -5  -6   1  310.47   22.30
   4   6  -1  179.58   16.80
   4   6  -1  151.58   14.30
   4   6  -1  186.48   15.30
   4   6  -1  173.38   10.90
   4   6  -1  183.08   13.80
  -4  -6   1  185.68   15.60
  -4  -6   1  177.28   16.20
  -4  -6   1  181.18   14.90
  -4  -6   1  182.38   18.90
  -4  -6   1  144.89   14.10
   3   6  -1    6.20    4.40
   3   6  -1    5.40    4.90
   3   6  -1    0.60    4.70
   3   6  -1   -0.60    5.90
  -3  -6   1    7.20    5.20
  -3  -6   1    4.10    4.70
  -3  -6   1   -0.30    4.70
  -3  -6   1   -2.50    5.20
   2   6  -1  342.77   22.00
   2   6  -1  326.87   21.40
   2   6  -1  300.27   22.90
   2   6  -1  338.27   20.80
  -2  -6   1  295.47   20.80
  -2  -6   1  350.76   23.00
  -2  -6   1  331.77   19.90
  -2  -6   1  316.37   21.40
  -2  -6   1  293.17   21.30
   1   6  -1  134.69   12.10
   1   6  -1  150.28   13.90
   1   6  -1  138.19   11.40
   1   6  -1  154.28   12.60
  -1  -6   1  162.38   12.70
  -1  -6   1  125.79   11.40
  -1  -6   1  145.59    9.90
  -1  -6   1  144.89   13.50
  -1  -6   1  150.48   10.60
  -1  -6   1  148.69   12.40
   0   6  -1  748.73   42.80
   0   6  -1  777.42   42.10
   0   6  -1  684.43   42.20
   0   6  -1  690.93   43.50
   0  -6   1  760.02   43.60
   0  -6   1  779.42   42.10
   0  -6   1  708.43   42.40
   0  -6   1  781.42   41.10
   0  -6   1  772.32   42.50
   0  -6   1  773.12   39.70
  -1   6  -1 6781.92  376.76
  -1   6  -1 7262.67  375.76
  -1   6  -1 6875.21  377.86
   1  -6   1 7006.20  377.66
   1  -6   1 6497.35  377.56
   1  -6   1 8016.70  377.06
   1  -6   1 7079.69  378.56
   1  -6   1 7905.91  375.96
  -2   6  -1   19.60    4.10
  -2   6  -1   22.60    5.60
  -2   6  -1   18.80    4.80
  -2   6  -1   22.00    4.80
  -2   6  -1   22.40    3.40
  -2   6  -1   31.60    7.30
  -2   6  -1   29.30    4.90
   2  -6   1   10.60    7.00
   2  -6   1   20.30    4.40
   2  -6   1   18.50    3.40
   2  -6   1   12.90    6.10
   2  -6   1   22.20    4.50
   2  -6   1   15.70    4.90
   2  -6   1   14.90    3.30
  -3   6  -1  127.69   10.20
  -3   6  -1  137.29    9.60
  -3   6  -1  139.49   11.00
  -3   6  -1  148.39    9.50
  -3   6  -1  144.29   10.20
  -3   6  -1  150.78   11.00
  -3   6  -1  126.29   10.10
  -3   6  -1  146.89   13.60
  -3   6  -1  138.19   13.10
   3  -6   1  105.19   13.40
   3  -6   1  120.39   14.30
   3  -6   1  120.59   12.90
   3  -6   1  119.99   10.20
   3  -6   1  137.29    7.60
   3  -6   1  164.18   14.60
   3  -6   1  128.29    9.80
   3  -6   1  129.49   13.90
   3  -6   1  136.19   10.50
   3  -6   1  138.69    9.90
   3  -6   1  130.19   12.60
  -4   6  -1  107.19    9.80
  -4   6  -1   92.99    9.70
  -4   6  -1   91.59    8.20
  -4   6  -1  111.99    9.30
  -4   6  -1  127.39    8.40
  -4   6  -1  107.79    7.60
  -4   6  -1  106.79   10.20
  -4   6  -1   84.69    9.40
  -4   6  -1  108.59    8.50
  -4   6  -1  108.89   12.20
  -4   6  -1  103.49   12.70
   4  -6   1  111.59    9.00
   4  -6   1  123.99   14.20
   4  -6   1  105.59    7.90
   4  -6   1  105.69   13.00
   4  -6   1  131.99   13.90
   4  -6   1   96.69    9.90
   4  -6   1  102.29   12.60
  -5   6  -1 1027.00   53.59
  -5   6  -1  979.60   56.79
  -5   6  -1  993.30   58.69
  -5   6  -1  921.51   56.49
  -5   6  -1 1015.90   68.49
  -5   6  -1  960.40   56.29
  -5   6  -1 1041.10   56.99
  -5   6  -1  926.41   58.09
  -5   6  -1 1030.50   58.99
  -5   6  -1 1060.69   54.59
  -5   6  -1 1059.19   55.29
   5  -6   1 1062.99   61.59
   5  -6   1  902.91   56.49
   5  -6   1  994.50   59.19
   5  -6   1 1004.80   60.69
   5  -6   1  991.10   62.79
   5  -6   1 1021.40   61.19
   5  -6   1 1010.80   60.49
  -6   6  -1  330.47   23.90
  -6   6  -1  354.36   26.40
  -6   6  -1  309.37   19.20
  -6   6  -1  352.26   26.80
  -6   6  -1  342.17   18.90
  -6   6  -1  337.87   26.10
  -6   6  -1  331.97   25.90
  -6   6  -1  312.47   22.80
  -6   6  -1  353.76   24.50
  -6   6  -1  369.86   19.90
  -6   6  -1  351.36   26.90
  -6   6  -1  391.46   22.40
  -6   6  -1  333.57   23.40
  -6   6  -1  349.87   25.90
  -6   6  -1  370.66   18.80
  -6   6  -1  356.96   23.40
   6  -6   1  331.27   27.30
   6  -6   1  321.77   28.00
   6  -6   1  308.77   27.40
   6  -6   1  294.97   26.00
   6  -6   1  341.37   27.60
   6  -6   1  391.36   28.80
  -7   6  -1   35.50    7.00
  -7   6  -1   47.50   11.10
  -7   6  -1   36.80    8.50
  -7   6  -1   47.10    8.70
  -7   6  -1   47.60   11.80
  -7   6  -1   41.40    9.80
  -7   6  -1   38.60    8.00
  -7   6  -1   48.30   12.40
  -7   6  -1   44.90   11.50
  -7   6  -1   46.80    9.30
  -7   6  -1   43.90   10.00
  -7   6  -1   49.30   11.80
  -7   6  -1   46.00   12.40
   7  -6   1   51.79   13.60
   7  -6   1   37.30   12.30
   7  -6   1   53.39   13.70
   7  -6   1   45.80   13.00
   7  -6   1   44.30   12.60
   7  -6   1   47.80   12.50
  -8   6  -1  594.94   37.50
  -8   6  -1  541.55   40.30
  -8   6  -1  590.84   40.60
  -8   6  -1  585.14   36.00
  -8   6  -1  568.64   37.40
  -8   6  -1  588.24   41.10
  -8   6  -1  638.64   38.50
  -8   6  -1  549.15   38.20
  -8   6  -1  562.74   41.70
  -8   6  -1  593.54   36.80
  -8   6  -1  597.24   36.40
  -8   6  -1  570.44   41.50
  -8   6  -1  555.64   41.00
  -9   6  -1   29.40   11.00
  -9   6  -1   52.69   13.80
  -9   6  -1   21.40   17.10
  -9   6  -1   55.49   11.90
  -9   6  -1   46.10   11.40
  -9   6  -1   45.60   10.40
  -9   6  -1   44.80    8.80
  -9   6  -1   44.00   10.20
  -9   6  -1   34.90    8.00
  -9   6  -1   46.50   11.00
 -10   6  -1  116.69   18.40
 -10   6  -1  164.38   18.20
 -10   6  -1  138.29   21.00
 -10   6  -1  150.08   16.50
 -10   6  -1  155.98   29.70
 -10   6  -1  158.78   21.40
 -10   6  -1  130.39   16.60
 -10   6  -1   97.29   13.90
 -10   6  -1  175.18   24.00
 -10   6  -1  134.89   14.40
 -10   6  -1  170.68   19.10
 -11   6  -1   -1.30    6.00
 -11   6  -1   15.30    7.00
 -12   6  -1    6.80    6.30
 -12   6  -1    2.90    2.20
 -12   6  -1    0.00    7.30
 -13   6  -1    9.90    5.80
 -13   6  -1    4.70    8.00
  12   5  -1   23.50   14.40
  12   5  -1   19.80   12.60
  12   5  -1   12.80   10.10
 -12  -5   1   11.80    9.20
 -12  -5   1   43.50   19.40
 -12  -5   1    8.30    8.00
  11   5  -1  180.28   24.40
  11   5  -1  126.89   15.50
  11   5  -1  155.38   19.60
  11   5  -1  193.88   24.80
 -11  -5   1  180.18   18.40
 -11  -5   1  205.58   18.80
 -11  -5   1  222.98   21.00
 -11  -5   1  171.68   20.00
 -11  -5   1  226.88   21.60
  10   5  -1   91.09   14.10
  10   5  -1  105.69   18.60
  10   5  -1  111.89   18.20
  10   5  -1   87.09   12.30
  10   5  -1   66.69    9.70
 -10  -5   1   92.49   15.80
 -10  -5   1  103.99   14.30
 -10  -5   1   84.79   12.70
 -10  -5   1   99.49   15.50
 -10  -5   1  109.99   15.80
 -10  -5   1   97.79   14.40
   9   5  -1  150.18   19.40
   9   5  -1  130.19   16.40
   9   5  -1  122.49   18.60
   9   5  -1  138.99   12.70
   9   5  -1  120.19   14.50
  -9  -5   1  132.29   14.60
  -9  -5   1  142.79   28.30
  -9  -5   1  138.79   16.70
  -9  -5   1  162.58   16.80
  -9  -5   1  146.39   23.00
  -9  -5   1  130.19   15.10
  -9  -5   1  168.68   17.40
  -9  -5   1  147.49   17.70
   8   5  -1   45.70   12.30
   8   5  -1   85.29   15.30
   8   5  -1   58.39    7.90
   8   5  -1   64.49   11.30
   8   5  -1   66.49   10.70
  -8  -5   1   81.09   15.20
  -8  -5   1   71.99   11.40
  -8  -5   1   47.30   10.50
  -8  -5   1   63.99   10.50
  -8  -5   1   72.09   12.70
   7   5  -1    8.60    9.10
   7   5  -1   10.10    4.50
   7   5  -1   17.70    4.60
   7   5  -1   17.70    7.50
   7   5  -1   20.40    9.20
   7   5  -1   24.70    5.50
  -7  -5   1   24.90   10.10
  -7  -5   1   14.60    7.70
  -7  -5   1   19.00    7.10
  -7  -5   1   16.10    7.00
  -7  -5   1   23.50    9.00
  -7  -5   1   35.60    9.10
  -7  -5   1   21.10   11.40
   6   5  -1   13.70    4.10
   6   5  -1    7.10    4.90
   6   5  -1    9.60    4.50
   6   5  -1    1.00    3.20
   6   5  -1   16.90    8.00
   6   5  -1   21.00    8.70
  -6  -5   1   27.20    7.00
  -6  -5   1   22.00    7.40
  -6  -5   1   20.40    8.40
  -6  -5   1   22.30    8.60
  -6  -5   1   10.70    6.40
  -6  -5   1    9.90    9.80
   5   5  -1   18.60    3.90
   5   5  -1    9.40    6.40
   5   5  -1    7.10    5.00
   5   5  -1   17.00    6.50
   5   5  -1   23.10    7.80
   5   5  -1   32.90    7.90
   5   5  -1    8.80    4.60
  -5  -5   1   20.90    6.50
  -5  -5   1   13.30    5.90
  -5  -5   1   19.60    7.90
  -5  -5   1   11.50    6.20
  -5  -5   1   20.90    7.70
   4   5  -1   27.00    7.90
   4   5  -1   34.00    6.40
   4   5  -1   29.30    3.30
   4   5  -1   17.50    5.90
   4   5  -1   33.60    7.00
   4   5  -1   40.40    6.40
  -4  -5   1   30.60    7.80
  -4  -5   1   25.60    6.20
  -4  -5   1   26.50    6.40
  -4  -5   1   46.10    8.20
  -4  -5   1   40.30    7.20
   3   5  -1  933.11   53.99
   3   5  -1  964.10   51.69
   3   5  -1  952.10   52.09
   3   5  -1  950.20   52.89
   3   5  -1  824.22   51.69
  -3  -5   1  849.22   51.59
  -3  -5   1  890.91   52.09
  -3  -5   1 1014.20   54.09
  -3  -5   1  956.20   52.29
  -3  -5   1  948.01   52.59
   2   5  -1  884.01   52.39
   2   5  -1  930.61   50.49
   2   5  -1  996.50   51.19
   2   5  -1  952.10   51.59
  -2  -5   1  977.00   51.19
  -2  -5   1  846.32   49.99
  -2  -5   1  827.12   50.39
  -2  -5   1  953.00   52.39
  -2  -5   1  842.32   50.99
   1   5  -1  211.18   14.80
   1   5  -1  201.38   14.40
   1   5  -1  220.38   14.10
   1   5  -1  194.68   15.20
  -1  -5   1  220.48   14.70
  -1  -5   1  229.68   15.90
  -1  -5   1  224.18   12.90
  -1  -5   1  188.68   14.40
  -1  -5   1  193.48   13.90
   0   5  -1  491.35   27.30
   0   5  -1  414.06   26.50
   0   5  -1  431.36   27.70
   0   5  -1  465.25   26.40
   0  -5   1  452.55   27.70
   0  -5   1  454.45   26.40
   0  -5   1  492.15   26.90
   0  -5   1  493.65   25.70
   0  -5   1  423.56   26.70
  -1   5  -1  576.14   31.20
  -1   5  -1  564.34   31.90
  -1   5  -1  571.04   32.30
  -1   5  -1  559.34   33.30
  -1   5  -1  539.25   32.40
   1  -5   1  514.25   33.00
   1  -5   1  581.44   32.30
   1  -5   1  544.25   30.50
   1  -5   1  572.54   33.90
   1  -5   1  634.74   31.40
   1  -5   1  589.34   32.00
   1  -5   1  562.94   32.80
   1  -5   1  615.24   32.30
  -2   5  -1 1458.05   69.89
  -2   5  -1 1384.76   70.09
  -2   5  -1 1307.67   66.69
  -2   5  -1 1205.28   67.29
  -2   5  -1 1126.39   67.39
  -2   5  -1 1184.88   67.99
  -2   5  -1 1212.48   66.99
  -2   5  -1 1319.27   67.69
   2  -5   1 1284.57   66.79
   2  -5   1 1287.57   68.29
   2  -5   1 1380.56   66.99
   2  -5   1 1212.68   66.89
   2  -5   1 1065.39   69.59
   2  -5   1 1094.99   69.29
   2  -5   1 1216.68   67.29
   2  -5   1 1318.97   66.99
  -3   5  -1  255.37   16.00
  -3   5  -1  255.37   18.60
  -3   5  -1  213.38   15.60
  -3   5  -1  251.67   14.70
  -3   5  -1  230.68   15.30
  -3   5  -1  247.08   14.60
  -3   5  -1  276.97   18.50
  -3   5  -1  241.08   14.20
  -3   5  -1  234.88   15.60
  -3   5  -1  209.58   14.60
   3  -5   1  263.17   19.10
   3  -5   1  252.57   15.10
   3  -5   1  216.98   17.60
   3  -5   1  245.58   14.80
   3  -5   1  230.78   18.80
   3  -5   1  227.18   19.20
   3  -5   1  252.37   15.90
   3  -5   1  241.38   17.80
   3  -5   1  266.27   18.80
   3  -5   1  255.97   14.50
  -4   5  -1 3585.84  191.48
  -4   5  -1 3870.31  189.28
  -4   5  -1 3278.17  192.68
  -4   5  -1 3704.33  193.78
  -4   5  -1 3176.58  189.48
  -4   5  -1 3402.46  191.68
  -4   5  -1 3491.65  193.28
  -4   5  -1 3377.26  191.38
  -4   5  -1 3538.45  189.98
  -4   5  -1 3721.23  194.58
  -4   5  -1 3723.63  190.58
  -4   5  -1 3498.05  191.48
  -4   5  -1 3805.02  194.28
  -4   5  -1 3608.84  194.18
  -4   5  -1 3329.27  191.48
  -4   5  -1 3842.42  189.18
   4  -5   1 3842.52  194.78
   4  -5   1 4086.79  195.48
   4  -5   1 3712.83  193.78
   4  -5   1 3781.62  195.58
   4  -5   1 3550.54  195.38
   4  -5   1 3538.55  188.68
   4  -5   1 3724.93  191.98
   4  -5   1 3431.16  194.58
   4  -5   1 3724.33  188.68
  -5   5  -1    6.00    6.40
  -5   5  -1    9.50    4.60
  -5   5  -1   10.70    7.40
  -5   5  -1    7.90    5.40
  -5   5  -1   11.20    6.70
  -5   5  -1    9.90    4.80
  -5   5  -1    7.90    7.10
  -5   5  -1    8.40    3.90
  -5   5  -1    9.20    4.60
  -5   5  -1    5.20    5.90
  -5   5  -1    7.60    2.70
  -5   5  -1    4.30    4.90
  -5   5  -1    6.10    2.20
  -5   5  -1    3.50    4.60
  -5   5  -1    9.00    7.00
   5  -5   1   -1.00    6.90
   5  -5   1    7.30    7.40
   5  -5   1   12.70    8.20
   5  -5   1    0.30    6.80
   5  -5   1    6.20    5.00
   5  -5   1   14.00    8.10
  -6   5  -1    8.10    8.40
  -6   5  -1   11.70    7.60
  -6   5  -1    5.80    7.60
  -6   5  -1   -1.10    4.30
  -6   5  -1   -5.70    6.10
  -6   5  -1    1.00    5.90
  -6   5  -1    7.60    7.00
  -6   5  -1    4.10    6.90
  -6   5  -1    1.60    4.70
  -6   5  -1    4.00    3.90
  -6   5  -1   -2.00    5.00
  -6   5  -1   -4.10    6.20
   6  -5   1    7.70    7.70
   6  -5   1    9.60    8.10
   6  -5   1    3.30    8.20
   6  -5   1    2.90    7.90
   6  -5   1   10.60    6.20
   6  -5   1    2.20    6.60
   6  -5   1    2.10    7.80
  -7   5  -1    1.40    6.10
  -7   5  -1   14.80    5.80
  -7   5  -1    1.80    9.10
  -7   5  -1   11.60    8.60
  -7   5  -1   12.80    6.80
  -7   5  -1    6.30    5.30
  -7   5  -1    9.70    6.10
  -7   5  -1    0.00    7.10
  -7   5  -1   19.20    7.90
  -7   5  -1    3.30    5.50
  -7   5  -1   16.50    8.90
  -7   5  -1    4.60    8.20
  -7   5  -1    6.10    7.60
   7  -5   1    1.40    8.80
   7  -5   1   16.00   10.60
   7  -5   1   -6.00    8.50
  -8   5  -1   51.89   12.50
  -8   5  -1   32.30    7.60
  -8   5  -1   50.49   13.00
  -8   5  -1   36.80    8.10
  -8   5  -1   36.30    8.40
  -8   5  -1   11.00   10.90
  -8   5  -1   30.10   11.10
  -8   5  -1   31.40    7.50
  -8   5  -1   38.30   10.70
  -8   5  -1   52.29   10.60
  -8   5  -1   34.80    9.20
  -8   5  -1   47.40   12.40
  -8   5  -1   37.00   12.30
  -9   5  -1  444.06   32.50
  -9   5  -1  394.16   27.10
  -9   5  -1  398.46   28.90
  -9   5  -1  416.36   33.60
  -9   5  -1  419.46   34.90
  -9   5  -1  454.65   32.40
  -9   5  -1  419.06   29.80
  -9   5  -1  415.16   29.30
  -9   5  -1  357.16   27.50
  -9   5  -1  393.06   28.20
  -9   5  -1  419.06   32.70
 -10   5  -1  119.59   19.00
 -10   5  -1   91.89   11.40
 -10   5  -1   87.89   16.70
 -10   5  -1   88.99   12.80
 -10   5  -1  110.19   15.50
 -10   5  -1   76.09    5.90
 -10   5  -1  110.49   21.40
 -10   5  -1   92.29   14.50
 -10   5  -1  103.69   18.20
 -10   5  -1   76.69    5.60
 -10   5  -1  109.29   13.80
 -10   5  -1   80.99   12.50
 -10   5  -1   92.69   17.80
 -11   5  -1   13.70    6.50
 -11   5  -1   16.90    8.40
 -11   5  -1   12.90    3.30
 -11   5  -1   10.80    2.70
 -12   5  -1   28.40    4.30
 -12   5  -1   27.20    4.70
 -12   5  -1   26.60    7.10
 -13   5  -1   22.40    9.30
 -13   5  -1   12.30    6.00
  12   4  -1   11.80   13.70
  12   4  -1    8.50   10.60
  12   4  -1   -1.50    8.60
 -12  -4   1    9.90    9.90
 -12  -4   1   13.80    9.30
 -12  -4   1   -7.40    9.20
  11   4  -1   10.60   10.70
  11   4  -1   10.10    8.20
  11   4  -1   13.50    6.30
  11   4  -1  -11.40    8.60
 -11  -4   1   29.70    9.80
 -11  -4   1   -6.60    7.90
 -11  -4   1    5.50    7.40
 -11  -4   1   -4.30    6.70
 -11  -4   1    4.30    7.50
 -11  -4   1   10.50    8.90
  10   4  -1  105.39   17.50
  10   4  -1  104.09   17.80
  10   4  -1   88.19   11.10
  10   4  -1  127.89   16.10
 -10  -4   1   97.69   13.80
 -10  -4   1  105.49   15.20
 -10  -4   1  136.29   17.80
 -10  -4   1   94.29   13.40
 -10  -4   1  117.79   18.60
 -10  -4   1  112.19   13.90
   9   4  -1   26.20    8.00
   9   4  -1   34.70   12.00
   9   4  -1   23.20    7.60
   9   4  -1   20.10   11.80
   9   4  -1   16.00    8.50
   9   4  -1   22.80    6.50
  -9  -4   1   52.89   18.90
  -9  -4   1   39.50   11.60
  -9  -4   1   16.30    9.50
  -9  -4   1   45.40   13.00
  -9  -4   1   32.30   14.50
  -9  -4   1   15.70    8.40
  -9  -4   1   16.70    7.10
  -9  -4   1   17.90    8.00
  -9  -4   1   21.60   10.40
   8   4  -1    6.50    2.90
   8   4  -1   10.80    9.20
   8   4  -1   17.60    7.40
   8   4  -1    4.50    6.40
   8   4  -1   14.20    9.30
   8   4  -1   12.10    5.40
  -8  -4   1    4.10    5.00
  -8  -4   1    7.80    7.80
  -8  -4   1    4.00    8.60
  -8  -4   1   24.00    9.90
  -8  -4   1    6.00    3.60
  -8  -4   1    9.70    6.10
  -8  -4   1    8.60    6.20
  -8  -4   1    7.90    6.50
   7   4  -1   70.19   12.30
   7   4  -1   67.19    6.90
   7   4  -1   96.69   14.60
   7   4  -1   93.19   13.00
   7   4  -1   81.99    6.80
   7   4  -1   68.29   10.70
   7   4  -1   81.49   10.20
   7   4  -1   91.99   11.10
  -7  -4   1   88.49   16.60
  -7  -4   1   75.49   11.90
  -7  -4   1   80.89   11.60
  -7  -4   1   90.69   14.20
  -7  -4   1   97.69   16.60
  -7  -4   1   86.69   11.00
  -7  -4   1   96.09   11.20
  -7  -4   1   87.39   11.40
   6   4  -1  282.17   18.00
   6   4  -1  275.27   22.20
   6   4  -1  299.87   18.50
   6   4  -1  276.07   18.40
   6   4  -1  312.37   22.70
   6   4  -1  298.37   20.70
   6   4  -1  289.77   20.90
   6   4  -1  301.67   22.10
  -6  -4   1  305.57   20.80
  -6  -4   1  279.97   21.80
  -6  -4   1  305.47   20.50
  -6  -4   1  286.97   25.20
  -6  -4   1  266.57   22.80
  -6  -4   1  296.27   20.00
   5   4  -1  100.69   11.80
   5   4  -1   83.79    8.90
   5   4  -1   89.99    8.40
   5   4  -1   73.39   10.70
   5   4  -1   93.19   11.60
   5   4  -1   91.99    8.00
  -5  -4   1  114.69   11.00
  -5  -4   1  101.19    9.90
  -5  -4   1  113.59   12.70
  -5  -4   1  105.09   14.30
  -5  -4   1   95.79   10.10
  -5  -4   1  111.99   12.10
   4   4  -1   15.20    5.20
   4   4  -1   16.10    6.70
   4   4  -1   10.40    4.50
   4   4  -1   16.40    4.30
   4   4  -1    9.20    5.20
   4   4  -1   12.80    1.70
   4   4  -1   11.10    3.10
  -4  -4   1   16.10    6.30
  -4  -4   1   20.40    6.60
  -4  -4   1   12.80    5.00
  -4  -4   1    1.30    3.80
   3   4  -1  663.03   36.50
   3   4  -1  565.64   36.80
   3   4  -1  645.94   38.80
   3   4  -1  687.03   37.00
   3   4  -1  665.63   37.70
  -3  -4   1  630.94   37.00
  -3  -4   1  707.53   38.80
  -3  -4   1  600.04   36.60
  -3  -4   1  631.54   37.30
  -3  -4   1  668.43   37.60
   2   4  -1 2693.33  139.49
   2   4  -1 2540.25  140.49
   2   4  -1 2880.91  139.29
   2   4  -1 2565.74  139.89
  -2  -4   1 2709.03  140.59
  -2  -4   1 2401.56  138.99
  -2  -4   1 2503.45  139.59
  -2  -4   1 2561.54  139.39
  -2  -4   1 2752.92  139.29
   1   4  -1 2176.38  121.49
   1   4  -1 2216.68  122.59
   1   4  -1 2384.06  121.39
   1   4  -1 2317.47  122.09
  -1  -4   1 2423.76  121.79
  -1  -4   1 2376.66  122.59
  -1  -4   1 2092.29  121.19
  -1  -4   1 2477.35  120.79
  -1  -4   1 2120.49  121.69
   0   4  -1 4501.05  234.08
   0   4  -1 4310.17  233.68
   0  -4   1 4430.96  233.58
   0  -4   1 4544.45  234.58
  -2   4  -1   12.40    5.40
  -2   4  -1   14.30    2.90
  -2   4  -1   20.00    5.50
  -2   4  -1   10.50    2.50
  -2   4  -1   10.90    3.30
  -2   4  -1   11.90    3.10
  -2   4  -1   12.50    3.00
  -2   4  -1   15.50    3.50
  -2   4  -1   14.00    2.30
   2  -4   1    9.30    5.40
   2  -4   1   10.30    2.00
   2  -4   1   12.50    3.20
   2  -4   1   14.90    5.40
   2  -4   1   12.10    4.50
   2  -4   1   15.70    5.20
   2  -4   1   12.90    2.50
   2  -4   1   17.40    5.20
   2  -4   1   17.20    3.00
   2  -4   1   17.10    3.40
   2  -4   1    9.70    5.50
   2  -4   1   11.40    2.10
  -3   4  -1   19.70    4.30
  -3   4  -1   17.70    3.00
  -3   4  -1   19.90    6.80
  -3   4  -1   23.00    5.90
  -3   4  -1   24.70    3.50
  -3   4  -1   23.30    4.40
  -3   4  -1   28.00    4.90
  -3   4  -1   29.30    6.30
  -3   4  -1   20.20    4.50
  -3   4  -1   20.30    6.50
  -3   4  -1   22.40    2.50
  -3   4  -1   24.30    3.50
  -3   4  -1   18.70    6.10
  -3   4  -1   34.60    6.70
  -3   4  -1   23.70    5.00
  -3   4  -1   21.80    2.70
   3  -4   1   24.80    3.00
   3  -4   1   34.70    7.20
   3  -4   1   33.30    5.60
   3  -4   1   26.00    3.20
   3  -4   1   26.40    7.40
   3  -4   1   30.90    7.40
   3  -4   1   19.80    7.10
   3  -4   1   13.50    6.90
   3  -4   1   19.60    6.20
  -4   4  -1 1069.39   64.59
  -4   4  -1 1130.39   62.69
  -4   4  -1 1031.50   62.69
  -4   4  -1 1113.89   65.49
  -4   4  -1 1203.58   65.39
  -4   4  -1 1124.89   64.89
  -4   4  -1 1099.79   65.29
  -4   4  -1 1138.29   60.49
  -4   4  -1 1136.79   61.89
  -4   4  -1 1069.69   60.29
  -4   4  -1 1122.19   62.59
  -4   4  -1 1049.59   63.09
  -4   4  -1 1047.80   62.59
  -4   4  -1 1099.79   64.59
   4  -4   1 1295.27   67.39
   4  -4   1 1235.88   66.29
   4  -4   1 1203.58   65.39
   4  -4   1 1092.79   65.69
   4  -4   1 1339.07   66.79
   4  -4   1 1165.28   66.39
   4  -4   1 1277.07   63.79
  -5   4  -1  429.06   28.60
  -5   4  -1  392.96   25.20
  -5   4  -1  423.36   25.20
  -5   4  -1  400.06   29.00
  -5   4  -1  368.86   25.90
  -5   4  -1  418.66   28.60
  -5   4  -1  423.76   25.70
  -5   4  -1  399.26   26.80
  -5   4  -1  420.76   28.70
  -5   4  -1  386.36   28.40
  -5   4  -1  474.95   29.40
  -5   4  -1  383.26   25.90
  -5   4  -1  398.86   25.80
   5  -4   1  415.96   32.40
   5  -4   1  421.06   32.30
   5  -4   1  438.96   32.30
   5  -4   1  452.35   34.00
   5  -4   1  416.86   32.40
   5  -4   1  456.25   30.10
   5  -4   1  426.76   27.00
  -6   4  -1  961.20   58.29
  -6   4  -1  983.80   61.09
  -6   4  -1 1002.00   62.19
  -6   4  -1  967.20   57.49
  -6   4  -1 1031.40   57.59
  -6   4  -1 1037.40   61.59
  -6   4  -1  955.50   63.89
  -6   4  -1  957.80   60.59
  -6   4  -1 1088.09   60.49
  -6   4  -1 1008.20   58.59
  -6   4  -1 1024.80   57.29
   6  -4   1 1112.99   62.69
   6  -4   1  997.60   59.39
   6  -4   1 1116.59   64.09
   6  -4   1 1150.18   63.59
  -7   4  -1  153.48   15.00
  -7   4  -1  164.58   17.70
  -7   4  -1  177.48   18.60
  -7   4  -1  175.38   20.70
  -7   4  -1  158.88   19.00
  -7   4  -1  163.28   14.60
  -7   4  -1  172.48   15.20
  -7   4  -1  167.38   18.20
  -7   4  -1  152.88   16.70
  -7   4  -1  138.19   14.50
  -7   4  -1  162.08   14.40
  -7   4  -1  176.58   19.00
  -7   4  -1  184.98   14.20
   7  -4   1  154.58   15.40
  -8   4  -1   95.79   17.00
  -8   4  -1  105.39   12.40
  -8   4  -1  128.49   18.30
  -8   4  -1   97.39   12.30
  -8   4  -1   86.79   12.90
  -8   4  -1   82.49   10.70
  -8   4  -1  136.59   19.80
  -8   4  -1  121.29   18.60
  -8   4  -1   88.39   14.70
  -8   4  -1   97.49   17.00
  -8   4  -1   96.09   12.70
  -8   4  -1  116.39   16.90
  -8   4  -1  117.69   14.20
  -9   4  -1  268.57   31.60
  -9   4  -1  202.58   18.40
  -9   4  -1  195.18   21.70
  -9   4  -1  232.48   22.40
  -9   4  -1  207.18   19.40
  -9   4  -1  203.68   12.10
  -9   4  -1  221.58   18.20
  -9   4  -1  247.58   39.50
  -9   4  -1  191.08   23.10
  -9   4  -1  213.48   16.80
  -9   4  -1  206.88   19.00
  -9   4  -1  214.58   19.20
  -9   4  -1  198.08   12.20
  -9   4  -1  234.58   23.30
 -10   4  -1   47.70   16.50
 -10   4  -1   33.10    9.10
 -10   4  -1   53.39    8.60
 -10   4  -1   49.40    5.40
 -10   4  -1   58.49   10.90
 -10   4  -1   56.49   15.00
 -10   4  -1   60.39   11.90
 -10   4  -1   45.10    4.90
 -10   4  -1   92.49   17.10
 -10   4  -1   53.69   10.20
 -10   4  -1   40.40   10.40
 -10   4  -1   77.39   15.10
 -11   4  -1    6.60    3.20
 -11   4  -1    6.60    3.40
 -11   4  -1    3.70    5.20
 -11   4  -1   11.00    7.40
 -12   4  -1    4.10    4.80
 -12   4  -1   -2.00    7.10
 -12   4  -1   -1.10    3.90
 -12   4  -1   -2.10    3.20
 -13   4  -1   31.10    6.70
 -13   4  -1   37.30   11.10
 -13   4  -1   40.60    5.70
  12   3  -1  121.39   21.10
  12   3  -1  116.89   20.50
  12   3  -1  137.69   17.50
 -12  -3   1  110.89   18.30
 -12  -3   1  166.58   20.40
 -12  -3   1  120.29   14.30
 -12  -3   1  103.09   14.70
 -12  -3   1  105.59   14.90
  11   3  -1    2.60   10.00
  11   3  -1   29.10   13.40
  11   3  -1   20.30    9.00
 -11  -3   1   32.20   11.00
 -11  -3   1   -0.10    6.60
 -11  -3   1   10.20    9.20
 -11  -3   1   11.90    7.10
 -11  -3   1    4.40    8.00
  10   3  -1  137.79   13.60
  10   3  -1  128.09   12.20
  10   3  -1  159.38   20.60
  10   3  -1  149.79   20.70
  10   3  -1  136.69   12.30
  10   3  -1  153.68   17.00
 -10  -3   1   95.09   14.40
 -10  -3   1  129.29   14.00
 -10  -3   1  140.59   17.60
 -10  -3   1  116.79   14.40
 -10  -3   1  138.19   14.10
 -10  -3   1  164.18   18.20
   9   3  -1    0.20    5.20
   9   3  -1    6.90    8.70
   9   3  -1   13.50    6.00
   9   3  -1   12.20    7.70
   9   3  -1   13.00    9.70
  -9  -3   1   -1.10    6.90
  -9  -3   1   -1.20    7.20
  -9  -3   1   13.40    8.40
  -9  -3   1   -1.00    6.80
  -9  -3   1   15.30    9.20
  -9  -3   1   -6.40   10.00
  -9  -3   1    1.40    6.50
  -9  -3   1    4.70    6.00
  -9  -3   1   26.00   11.70
  -9  -3   1   15.10   11.70
   8   3  -1  131.99   14.30
   8   3  -1  101.69   15.20
   8   3  -1   75.09   10.90
   8   3  -1   99.99   15.70
   8   3  -1  108.19   11.10
   8   3  -1   86.89   10.80
  -8  -3   1   86.79   10.60
  -8  -3   1  141.89   20.90
  -8  -3   1  107.99   11.60
  -8  -3   1   80.29   12.00
  -8  -3   1   99.79   12.10
  -8  -3   1  123.99   14.60
   7   3  -1    6.30    5.80
   7   3  -1    5.20    7.30
   7   3  -1    8.80    5.70
   7   3  -1    5.80    8.50
   7   3  -1    1.40    4.30
   7   3  -1   10.60    6.40
  -7  -3   1    2.30    8.40
  -7  -3   1    2.10    5.20
  -7  -3   1    8.30    5.50
  -7  -3   1    4.90    6.40
  -7  -3   1   -4.20    2.90
  -7  -3   1   -0.90    6.10
  -7  -3   1    6.20    6.40
  -7  -3   1    5.00    9.30
   6   3  -1  111.79    9.30
   6   3  -1   91.49   11.20
   6   3  -1  101.39    7.20
   6   3  -1   73.99   11.50
   6   3  -1   98.29   10.70
   6   3  -1  115.39   13.40
   6   3  -1  109.89   11.80
   6   3  -1   96.09    7.40
  -6  -3   1   89.29   14.70
  -6  -3   1  111.79   10.60
  -6  -3   1   96.49   11.40
  -6  -3   1  115.29   13.60
  -6  -3   1   93.79   11.40
  -6  -3   1  100.29   10.20
  -6  -3   1   93.69    9.60
   5   3  -1  341.77   20.30
   5   3  -1  309.67   22.10
   5   3  -1  326.27   20.70
   5   3  -1  358.36   20.80
   5   3  -1  327.47   23.60
   5   3  -1  392.26   24.30
   5   3  -1  353.16   22.40
   5   3  -1  359.86   23.60
  -5  -3   1  350.86   22.00
  -5  -3   1  352.56   23.20
  -5  -3   1  376.56   26.50
  -5  -3   1  325.07   21.30
  -5  -3   1  352.36   24.30
  -5  -3   1  357.16   22.20
   4   3  -1 1365.26   72.99
   4   3  -1 1172.48   74.09
   4   3  -1 1362.76   74.69
   4   3  -1 1400.86   72.49
   4   3  -1 1347.97   72.49
   4   3  -1 1392.46   74.79
  -4  -3   1 1403.66   73.99
  -4  -3   1 1272.87   73.29
  -4  -3   1 1313.57   74.39
  -4  -3   1 1329.97   73.09
  -4  -3   1 1395.26   76.69
  -4  -3   1 1459.85   75.29
   3   3  -1   21.90    4.60
   3   3  -1   25.80    2.50
   3   3  -1   22.80    5.20
   3   3  -1   33.30    4.70
   3   3  -1   29.40    6.00
   3   3  -1   30.80    5.00
  -3  -3   1   30.40    6.20
  -3  -3   1   26.80    5.80
  -3  -3   1   28.80    5.40
  -3  -3   1   24.00    4.70
  -3  -3   1   27.20    4.90
   2   3  -1 1083.59   53.49
   2   3  -1  907.61   53.39
   2   3  -1 1020.90   53.69
   2   3  -1  988.90   54.59
   2   3  -1  970.90   53.99
  -2  -3   1  958.40   53.59
  -2  -3   1  955.00   53.79
  -2  -3   1 1051.89   53.89
  -2  -3   1 1010.00   54.49
  -2  -3   1  901.81   53.19
   1   3  -1 3690.33  195.68
   1   3  -1 3501.05  195.28
   1   3  -1 3698.23  196.18
  -1  -3   1 3599.24  195.18
  -1  -3   1 3795.92  196.08
  -1  -3   1 3996.80  195.48
   0   3  -1   21.40    4.40
   0   3  -1   29.20    5.20
   0   3  -1   31.30    4.60
   0   3  -1   27.20    5.60
   0  -3   1   30.10    4.70
   0  -3   1   16.60    5.00
   0  -3   1   35.90    5.00
   0  -3   1   25.90    3.30
   0  -3   1   25.00    4.40
   0  -3   1   30.60    4.80
  -1   3  -1  312.17   18.30
  -1   3  -1  290.47   17.50
  -1   3  -1  289.37   16.60
  -1   3  -1  323.87   18.70
  -1   3  -1  253.17   16.80
  -1   3  -1  290.37   16.90
  -1   3  -1  304.87   16.10
   1  -3   1  279.67   16.60
   1  -3   1  313.47   17.00
   1  -3   1  270.87   18.70
   1  -3   1  267.17   16.30
   1  -3   1  264.57   18.20
   1  -3   1  305.37   16.20
   1  -3   1  310.27   16.80
  -2   3  -1 1732.73   94.19
  -2   3  -1 1696.43   91.79
  -2   3  -1 1657.03   91.59
  -2   3  -1 1829.42   93.99
  -2   3  -1 1801.02   91.29
  -2   3  -1 1689.93   93.19
  -2   3  -1 1682.23   92.39
  -2   3  -1 1636.94   92.09
  -2   3  -1 1780.92   93.69
  -2   3  -1 1742.83   91.59
  -2   3  -1 1886.71   92.49
   2  -3   1 1633.54   94.09
   2  -3   1 1861.61   91.49
   2  -3   1 1648.44   93.99
   2  -3   1 1921.41   91.79
   2  -3   1 1655.93   92.39
   2  -3   1 1602.84   94.19
   2  -3   1 1789.72   93.49
   2  -3   1 1676.63   93.89
   2  -3   1 1875.81   91.79
   2  -3   1 1660.63   93.59
  -3   3  -1    0.30    4.50
  -3   3  -1    2.10    3.00
  -3   3  -1    5.10    1.70
  -3   3  -1    2.10    3.10
  -3   3  -1    5.60    3.20
  -3   3  -1    4.40    2.90
  -3   3  -1    7.40    4.80
  -3   3  -1    4.40    2.40
  -3   3  -1    0.90    3.60
  -3   3  -1    7.00    4.70
  -3   3  -1    1.00    4.70
  -3   3  -1    3.20    1.50
  -3   3  -1    2.00    4.20
  -3   3  -1    6.60    4.90
   3  -3   1    9.10    5.70
   3  -3   1    4.50    5.50
   3  -3   1    2.10    3.80
   3  -3   1    7.70    5.70
   3  -3   1    0.20    5.00
   3  -3   1    3.40    5.60
   3  -3   1    5.70    5.30
  -4   3  -1  902.41   51.49
  -4   3  -1  888.51   51.09
  -4   3  -1  898.21   50.99
  -4   3  -1  875.21   52.29
  -4   3  -1  874.01   48.80
  -4   3  -1  917.11   53.89
  -4   3  -1  934.41   54.09
  -4   3  -1  845.12   48.80
  -4   3  -1  865.71   51.59
  -4   3  -1  885.11   53.69
  -4   3  -1  880.51   51.79
  -4   3  -1  894.11   51.29
  -4   3  -1  926.81   54.69
  -4   3  -1  845.92   53.79
  -4   3  -1  891.01   53.89
   4  -3   1 1009.80   54.89
   4  -3   1  969.60   52.69
   4  -3   1  906.51   54.59
   4  -3   1 1051.49   55.59
   4  -3   1 1021.40   55.89
   4  -3   1 1069.19   55.19
   4  -3   1 1004.00   52.19
   4  -3   1 1070.29   55.49
   4  -3   1 1006.90   52.19
  -5   3  -1  372.96   24.60
  -5   3  -1  373.66   27.60
  -5   3  -1  364.06   27.10
  -5   3  -1  362.36   24.60
  -5   3  -1  369.66   27.10
  -5   3  -1  356.66   27.90
  -5   3  -1  379.76   26.90
  -5   3  -1  372.06   27.20
  -5   3  -1  370.96   25.60
  -5   3  -1  382.06   24.30
  -5   3  -1  367.06   23.50
  -5   3  -1  352.46   23.80
   5  -3   1  409.36   29.50
   5  -3   1  429.76   29.20
   5  -3   1  438.36   24.60
   5  -3   1  425.26   25.40
   5  -3   1  459.75   29.30
   5  -3   1  414.06   26.00
   5  -3   1  452.15   25.60
  -6   3  -1    5.00    7.30
  -6   3  -1   10.90    8.00
  -6   3  -1   25.50    8.70
  -6   3  -1    1.30    5.40
  -6   3  -1   12.50    8.00
  -6   3  -1    7.00    4.90
  -6   3  -1    8.00    7.20
  -6   3  -1   11.00    6.60
  -6   3  -1    7.40    3.90
  -6   3  -1   10.10    4.80
  -6   3  -1   11.30    7.40
   6  -3   1    4.80    5.60
   6  -3   1    8.40    5.80
   6  -3   1   16.30    7.00
   6  -3   1    2.90    4.20
   6  -3   1    1.30    8.20
  -7   3  -1   -4.40    6.80
  -7   3  -1   20.20    9.50
  -7   3  -1    3.80    5.80
  -7   3  -1    2.90    4.00
  -7   3  -1   -4.10    5.60
  -7   3  -1    4.90    5.40
  -7   3  -1    9.50    5.10
  -7   3  -1    2.70    8.70
  -7   3  -1   10.10    8.10
  -7   3  -1    7.60    8.40
  -7   3  -1    0.80    7.20
  -7   3  -1   13.20    7.80
   7  -3   1   12.40    7.20
   7  -3   1    7.80    5.40
   7  -3   1    0.10    5.70
  -8   3  -1   20.50    9.90
  -8   3  -1   15.20    7.10
  -8   3  -1   20.40    8.00
  -8   3  -1   26.10    3.40
  -8   3  -1   26.80    7.10
  -8   3  -1   22.20   10.90
  -8   3  -1   20.90   11.50
  -8   3  -1   23.30    5.90
  -8   3  -1   34.50   10.60
  -8   3  -1   30.40   10.70
  -8   3  -1   13.50    8.80
  -8   3  -1   22.60    3.10
  -8   3  -1   25.80    8.70
  -8   3  -1   28.00   11.50
   8  -3   1   20.80    9.20
   8  -3   1   16.70    8.40
   8  -3   1   14.50    7.00
  -9   3  -1   22.70    8.50
  -9   3  -1   29.00   14.00
  -9   3  -1   17.20    3.80
  -9   3  -1   14.30   10.10
  -9   3  -1   16.20   10.80
  -9   3  -1   23.10    8.00
  -9   3  -1   33.10   14.60
  -9   3  -1   14.50    3.50
  -9   3  -1   26.50   13.80
  -9   3  -1   20.90    8.70
  -9   3  -1    3.50    8.90
  -9   3  -1   14.50    6.90
  -9   3  -1   18.70    8.10
   9  -3   1   20.20    7.60
   9  -3   1   18.90    9.60
   9  -3   1   26.70    9.20
 -10   3  -1   -7.10    7.90
 -10   3  -1   -1.90    3.20
 -10   3  -1    6.20    9.60
 -10   3  -1    2.30   10.00
 -10   3  -1   19.40   11.90
 -10   3  -1    9.60    5.50
 -10   3  -1   -3.20    2.70
 -10   3  -1    2.40    9.10
 -10   3  -1    5.70    6.90
  10  -3   1  -11.90    7.00
  10  -3   1    1.80    8.00
 -11   3  -1    3.30    3.30
 -11   3  -1    4.80    4.90
 -11   3  -1   -2.60    7.30
 -11   3  -1   23.30   11.40
 -11   3  -1    0.80    3.90
  11  -3   1   13.20   10.60
 -12   3  -1   12.90    9.10
 -12   3  -1   -2.10    3.40
 -12   3  -1   -6.60    4.30
 -13   3  -1   -2.70    2.50
 -13   3  -1    8.40    8.60
 -13   3  -1    2.10    4.00
  13   2  -1   31.00   12.50
  13   2  -1   20.10   10.20
  13   2  -1    9.20   12.90
 -13  -2   1   13.30   12.10
 -13  -2   1   10.10    6.60
 -13  -2   1   12.40    8.30
  12   2  -1   -0.70   10.10
  12   2  -1    9.90   11.80
  12   2  -1    4.80    8.30
 -12  -2   1    2.70    6.40
 -12  -2   1   -9.00    7.60
 -12  -2   1   10.10    8.00
 -12  -2   1    6.30    6.50
 -12  -2   1   11.10   10.40
  11   2  -1    9.90   11.40
  11   2  -1    4.90    8.10
  11   2  -1    6.00    9.40
 -11  -2   1   31.30    9.60
 -11  -2   1   18.10    9.80
 -11  -2   1    3.10    7.00
 -11  -2   1    2.40    5.80
 -11  -2   1   -1.40    6.10
  10   2  -1   31.40   11.70
  10   2  -1   49.20    8.90
  10   2  -1   50.19    5.20
  10   2  -1   28.90    9.30
  10   2  -1   43.00   12.90
 -10  -2   1   32.30    8.20
 -10  -2   1   46.50   11.80
 -10  -2   1   49.40   11.50
 -10  -2   1   44.20    8.20
 -10  -2   1   34.00    9.00
 -10  -2   1   25.60    7.90
   9   2  -1   -1.90    7.70
   9   2  -1    1.60    8.70
   9   2  -1   -0.10    4.10
   9   2  -1    5.60    5.50
   9   2  -1    2.10    6.60
  -9  -2   1   -0.60    6.70
  -9  -2   1    2.90    5.70
  -9  -2   1    6.00    8.30
  -9  -2   1    4.70    9.40
  -9  -2   1    5.60    7.80
  -9  -2   1    4.20    8.40
  -9  -2   1    5.50    5.40
  -9  -2   1    5.90   11.30
  -9  -2   1    3.50    5.40
   8   2  -1    7.80    5.20
   8   2  -1   16.70    7.30
   8   2  -1   17.90    5.90
   8   2  -1    1.10    8.10
   8   2  -1    8.50    5.60
   8   2  -1   13.90    9.30
  -8  -2   1   11.80    7.90
  -8  -2   1    7.90    5.70
  -8  -2   1    7.20    6.60
  -8  -2   1   12.70    5.70
  -8  -2   1    9.50    6.00
  -8  -2   1    3.40    7.50
  -8  -2   1    4.10    8.30
  -8  -2   1   12.70   10.20
  -8  -2   1   13.10    5.70
   7   2  -1   45.40   10.30
   7   2  -1   43.10    7.30
   7   2  -1   43.10    6.80
   7   2  -1   35.60    7.80
   7   2  -1   35.00   10.50
   7   2  -1   42.60    8.00
  -7  -2   1   37.70    6.70
  -7  -2   1   33.80    7.60
  -7  -2   1   42.80   10.80
  -7  -2   1   30.40    6.00
  -7  -2   1   53.29   10.50
  -7  -2   1   49.00   10.60
  -7  -2   1   47.00    7.60
  -7  -2   1   42.80   13.00
   6   2  -1  430.66   26.70
   6   2  -1  402.76   27.50
   6   2  -1  439.16   29.30
   6   2  -1  456.35   27.60
   6   2  -1  396.86   26.00
   6   2  -1  491.45   29.80
  -6  -2   1  445.36   29.80
  -6  -2   1  469.75   32.40
  -6  -2   1  387.46   27.00
  -6  -2   1  441.86   26.40
  -6  -2   1  451.85   29.00
  -6  -2   1  412.66   26.40
  -6  -2   1  438.16   29.30
  -6  -2   1  494.65   32.90
  -6  -2   1  463.85   26.20
   5   2  -1  462.55   25.80
   5   2  -1  472.25   28.70
   5   2  -1  501.65   28.90
   5   2  -1  460.45   28.00
   5   2  -1  475.15   27.40
   5   2  -1  441.76   29.60
   5   2  -1  485.05   30.00
  -5  -2   1  481.25   32.20
  -5  -2   1  426.76   28.40
  -5  -2   1  489.15   27.30
  -5  -2   1  485.05   27.90
  -5  -2   1  443.96   29.30
  -5  -2   1  484.55   30.40
  -5  -2   1  477.95   27.70
   4   2  -1 2030.40  106.79
   4   2  -1 1980.00  105.49
   4   2  -1 2099.19  107.09
   4   2  -1 2082.69  105.99
   4   2  -1 2080.69  105.29
   4   2  -1 2105.19  107.39
   4   2  -1 1817.42  107.39
   4   2  -1 1946.61  107.69
  -4  -2   1 1840.82  106.89
  -4  -2   1 2067.99  108.39
  -4  -2   1 1874.41  106.39
  -4  -2   1 2095.29  109.89
  -4  -2   1 2109.89  107.59
  -4  -2   1 1885.51  105.79
  -4  -2   1 1870.01  106.09
   3   2  -1  876.41   47.50
   3   2  -1  870.51   46.40
   3   2  -1  928.81   46.10
   3   2  -1  788.92   47.40
   3   2  -1  779.62   47.30
   3   2  -1  932.41   46.20
  -3  -2   1  836.52   46.30
  -3  -2   1  848.92   46.90
  -3  -2   1  816.12   47.30
  -3  -2   1  904.91   47.40
  -3  -2   1  750.82   46.40
  -3  -2   1  892.11   48.00
   2   2  -1   97.49    8.30
   2   2  -1   99.39    8.00
   2   2  -1  104.89    7.50
   2   2  -1  102.29    9.20
  -2  -2   1  106.69    8.00
  -2  -2   1  109.29    9.30
  -2  -2   1  104.99    7.70
  -2  -2   1  111.59    8.90
  -2  -2   1  108.29    8.10
   1   2  -1  905.91   47.20
   1   2  -1  930.51   46.30
   1   2  -1  845.22   46.70
   1   2  -1  802.42   46.30
  -1  -2   1  905.01   46.50
  -1  -2   1  848.82   47.30
  -1  -2   1  830.12   46.90
  -1  -2   1  829.92   46.20
  -1   2  -1 3595.24  179.18
   1  -2   1 3175.88  180.78
   1  -2   1 3240.68  179.68
   1  -2   1 3339.87  180.78
   1  -2   1 3308.37  180.58
   1  -2   1 3583.34  179.18
   1  -2   1 3754.92  179.28
  -2   2  -1  183.48   12.20
  -2   2  -1  171.98   14.00
  -2   2  -1  188.68   10.70
  -2   2  -1  194.58   11.50
  -2   2  -1  198.08   12.10
  -2   2  -1  174.18   13.80
  -2   2  -1  203.58   14.00
  -2   2  -1  181.68   14.10
  -2   2  -1  190.58   10.80
  -2   2  -1  182.58   12.10
  -2   2  -1  200.38   14.10
  -2   2  -1  203.88   12.40
  -2   2  -1  200.08   14.30
  -2   2  -1  193.98   12.00
  -2   2  -1  172.68   12.70
   2  -2   1  209.18   10.30
   2  -2   1  161.48   14.20
   2  -2   1  194.68   14.60
   2  -2   1  177.68   14.20
   2  -2   1  181.68   14.30
   2  -2   1  190.78   12.20
   2  -2   1  200.88   10.40
   2  -2   1  184.98   14.90
   2  -2   1  188.88   14.40
   2  -2   1  166.18   12.70
  -3   2  -1 1339.07   74.09
  -3   2  -1 1390.16   74.09
  -3   2  -1 1319.07   74.49
  -3   2  -1 1348.67   75.79
  -3   2  -1 1288.67   75.59
  -3   2  -1 1273.87   75.79
  -3   2  -1 1304.27   72.19
  -3   2  -1 1296.77   73.59
  -3   2  -1 1365.86   76.39
  -3   2  -1 1345.37   73.79
  -3   2  -1 1351.66   75.69
  -3   2  -1 1343.77   73.59
  -3   2  -1 1353.06   72.09
  -3   2  -1 1386.76   75.69
   3  -2   1 1417.86   74.79
   3  -2   1 1418.56   75.99
   3  -2   1 1409.46   76.89
   3  -2   1 1386.86   76.29
   3  -2   1 1371.46   75.99
   3  -2   1 1511.95   73.89
   3  -2   1 1461.05   76.49
   3  -2   1 1441.76   74.29
   3  -2   1 1477.15   74.29
   3  -2   1 1378.06   76.29
   3  -2   1 1407.36   73.79
  -4   2  -1  759.22   46.30
  -4   2  -1  786.92   49.00
  -4   2  -1  852.11   49.60
  -4   2  -1  849.41   46.40
  -4   2  -1  813.32   49.80
  -4   2  -1  801.32   46.90
  -4   2  -1  798.02   44.10
  -4   2  -1  748.23   46.70
  -4   2  -1  829.62   49.20
  -4   2  -1  808.22   45.90
  -4   2  -1  815.12   49.00
  -4   2  -1  776.52   47.50
  -4   2  -1  801.22   48.80
  -4   2  -1  779.42   44.30
   4  -2   1  913.51   46.50
   4  -2   1  868.11   47.20
   4  -2   1  918.51   47.40
   4  -2   1  926.31   48.20
   4  -2   1  924.31   50.99
   4  -2   1  880.71   50.09
   4  -2   1  868.01   49.80
   4  -2   1  918.81   46.70
  -5   2  -1  796.52   51.79
  -5   2  -1  898.71   52.99
  -5   2  -1  874.81   50.89
  -5   2  -1  845.12   53.29
  -5   2  -1  872.91   49.90
  -5   2  -1  895.01   52.89
  -5   2  -1  859.61   51.99
  -5   2  -1  799.72   48.70
  -5   2  -1  790.42   49.00
  -5   2  -1  893.81   52.69
  -5   2  -1  823.62   46.60
  -5   2  -1  853.21   48.30
  -5   2  -1  844.92   49.70
   5  -2   1  899.91   55.99
   5  -2   1  973.10   49.50
   5  -2   1  942.41   50.39
   5  -2   1  955.70   51.69
   5  -2   1  938.01   50.39
   5  -2   1  912.11   49.00
  -6   2  -1   62.59    9.90
  -6   2  -1   72.79    4.90
  -6   2  -1   87.69    9.60
  -6   2  -1   65.89   13.10
  -6   2  -1   64.29   12.10
  -6   2  -1   84.89   12.30
  -6   2  -1   73.59   12.30
  -6   2  -1   70.59    4.80
  -6   2  -1   97.29   14.20
  -6   2  -1   67.19    8.30
  -6   2  -1   86.19   13.60
  -6   2  -1   76.29    8.00
   6  -2   1   86.99   12.20
   6  -2   1   68.19    8.30
   6  -2   1   81.69   11.00
   6  -2   1   80.09   11.00
   6  -2   1   82.19    9.40
  -7   2  -1  128.59   13.80
  -7   2  -1   98.19   11.50
  -7   2  -1   87.19    6.60
  -7   2  -1  111.09   11.00
  -7   2  -1   93.19   15.70
  -7   2  -1   90.69    7.20
  -7   2  -1  106.99   15.50
  -7   2  -1  100.59    6.80
  -7   2  -1  126.39   18.40
  -7   2  -1   85.59   14.70
  -7   2  -1   83.59    9.10
  -7   2  -1  102.19   14.10
  -7   2  -1   70.99   14.60
  -7   2  -1   79.89   11.30
  -7   2  -1  112.99   16.60
   7  -2   1   91.69   13.00
   7  -2   1   89.39   10.70
   7  -2   1  104.09   12.90
  -8   2  -1  370.96   20.50
  -8   2  -1  342.37   28.70
  -8   2  -1  363.76   20.70
  -8   2  -1  296.07   22.00
  -8   2  -1  348.67   28.10
  -8   2  -1  350.16   20.50
  -8   2  -1  378.46   26.00
  -8   2  -1  390.86   24.60
  -8   2  -1  371.26   26.00
  -8   2  -1  380.16   22.70
  -8   2  -1  393.96   29.10
  -8   2  -1  360.16   31.10
  -8   2  -1  330.77   28.80
   8  -2   1  361.16   24.80
   8  -2   1  322.37   26.10
   8  -2   1  303.57   25.70
  -9   2  -1   56.89   13.30
  -9   2  -1   77.69   15.40
  -9   2  -1   67.39   10.20
  -9   2  -1   76.69   15.30
  -9   2  -1   53.09   14.60
  -9   2  -1   58.19    6.40
  -9   2  -1   49.60    7.60
  -9   2  -1   56.49    6.30
  -9   2  -1   42.40   13.80
  -9   2  -1   50.99    5.90
  -9   2  -1   64.89    7.00
   9  -2   1   75.29   13.40
   9  -2   1   61.79   12.40
   9  -2   1   72.89   11.40
 -10   2  -1    3.00    8.60
 -10   2  -1    4.60    3.90
 -10   2  -1   -3.90    3.70
 -10   2  -1    0.90    2.40
 -10   2  -1   -1.80    2.70
 -10   2  -1    1.60    8.50
 -10   2  -1    2.00    3.30
  10  -2   1    1.20    8.50
  10  -2   1   -1.50    6.50
 -11   2  -1   10.50    4.50
 -11   2  -1   12.10    4.50
 -11   2  -1    3.10    7.00
 -11   2  -1    5.30    4.40
 -11   2  -1   56.39   13.10
  11  -2   1    5.80   10.20
  11  -2   1   -8.00   10.80
  11  -2   1   11.80   10.20
 -12   2  -1   12.70    9.70
 -12   2  -1   -4.10    4.80
 -12   2  -1    3.50    2.90
  12  -2   1   -6.90    8.90
 -13   2  -1   15.20   10.20
 -13   2  -1    6.10    5.10
  13  -2   1    6.80   12.10
  13   1  -1   12.80    9.70
  13   1  -1   15.70   12.50
  13   1  -1   19.20   13.00
 -13  -1   1    4.30    6.40
 -13  -1   1   -4.40    5.70
 -13  -1   1    7.10    5.10
  12   1  -1    1.00    7.60
  12   1  -1    6.40   11.00
  12   1  -1    7.80   11.80
 -12  -1   1    0.80    7.40
 -12  -1   1   12.70    6.50
 -12  -1   1    4.00    6.60
 -12  -1   1   15.20    9.30
  11   1  -1   -3.90    7.60
  11   1  -1  -11.00    9.00
  11   1  -1    2.00    9.40
 -11  -1   1    3.30    4.90
 -11  -1   1   17.10   10.30
 -11  -1   1    1.40    5.20
 -11  -1   1  -14.10   15.60
 -11  -1   1    4.90    6.20
 -11  -1   1    5.70    6.10
  10   1  -1   20.80    7.20
  10   1  -1   22.90   10.50
  10   1  -1   20.10   10.50
  10   1  -1   21.20    8.70
 -10  -1   1   19.00    6.30
 -10  -1   1   29.00    9.70
 -10  -1   1   32.90   11.70
 -10  -1   1   22.50    9.30
 -10  -1   1   11.90    6.00
 -10  -1   1   12.40    6.80
 -10  -1   1   21.40    6.70
   9   1  -1  232.78   21.30
   9   1  -1  196.98   18.00
   9   1  -1  188.38   16.00
   9   1  -1  196.08   20.20
  -9  -1   1  203.28   19.90
  -9  -1   1  174.08   15.90
  -9  -1   1  156.98   15.20
  -9  -1   1  186.58   14.80
  -9  -1   1  225.58   28.00
  -9  -1   1  179.48   19.20
  -9  -1   1  204.88   25.40
   8   1  -1  148.49   11.50
   8   1  -1  139.19   15.10
   8   1  -1  165.98   17.70
   8   1  -1  156.48   11.70
   8   1  -1  149.29   16.80
   8   1  -1  152.38   14.00
  -8  -1   1  192.18   22.90
  -8  -1   1  161.28   17.10
  -8  -1   1  160.88   17.70
  -8  -1   1  149.79   12.20
  -8  -1   1  212.18   24.90
  -8  -1   1  152.18   12.60
  -8  -1   1  176.58   13.40
  -8  -1   1  121.99   13.70
   7   1  -1  430.76   29.50
   7   1  -1  485.25   30.20
   7   1  -1  384.26   27.30
   7   1  -1  438.16   25.70
   7   1  -1  417.06   26.40
   7   1  -1  425.76   25.40
  -7  -1   1  433.16   32.10
  -7  -1   1  466.25   33.90
  -7  -1   1  453.45   25.70
  -7  -1   1  432.36   29.50
  -7  -1   1  428.36   22.40
  -7  -1   1  402.46   30.00
  -7  -1   1  398.46   29.60
  -7  -1   1  392.46   27.90
  -7  -1   1  387.06   24.80
  -7  -1   1  448.46   32.80
  -7  -1   1  446.86   25.80
  -7  -1   1  356.46   25.90
   6   1  -1  468.75   27.80
   6   1  -1  478.05   27.40
   6   1  -1  461.15   29.00
   6   1  -1  490.05   30.70
   6   1  -1  520.65   30.90
   6   1  -1  454.85   28.80
  -6  -1   1  498.85   31.50
  -6  -1   1  434.46   32.70
  -6  -1   1  401.46   27.70
  -6  -1   1  485.15   29.80
  -6  -1   1  445.66   27.30
  -6  -1   1  487.15   33.10
  -6  -1   1  480.35   26.80
  -6  -1   1  485.55   30.50
  -6  -1   1  441.86   30.40
  -6  -1   1  477.15   27.20
  -6  -1   1  429.96   24.90
   5   1  -1    4.10    3.30
   5   1  -1    1.90    5.20
   5   1  -1    1.70    6.30
   5   1  -1   -0.80    3.90
   5   1  -1   -3.40    3.00
   5   1  -1   -1.60    3.60
  -5  -1   1   -2.70    2.60
  -5  -1   1   -2.50    2.80
  -5  -1   1   -4.80    4.40
  -5  -1   1    1.00    6.60
  -5  -1   1   -0.30    6.40
  -5  -1   1    4.80    4.90
  -5  -1   1   -2.70    5.30
  -5  -1   1    2.50    3.30
  -5  -1   1    0.80    4.80
  -5  -1   1   -0.50    1.30
   4   1  -1  686.13   40.90
   4   1  -1  829.02   39.60
   4   1  -1  648.24   37.20
   4   1  -1  661.83   40.70
   4   1  -1  776.42   39.90
   4   1  -1  744.43   39.40
   4   1  -1  762.42   40.30
  -4  -1   1  676.63   39.10
  -4  -1   1  754.12   41.80
  -4  -1   1  636.24   38.70
  -4  -1   1  728.83   38.70
  -4  -1   1  647.44   39.40
  -4  -1   1  757.32   43.20
  -4  -1   1  728.83   40.60
  -4  -1   1  650.83   37.30
  -4  -1   1  685.23   40.80
   3   1  -1  471.65   27.00
   3   1  -1  531.95   26.90
   3   1  -1  497.15   27.10
   3   1  -1  459.95   27.90
   3   1  -1  470.25   26.00
   3   1  -1  511.15   27.50
   3   1  -1  534.25   27.50
   3   1  -1  427.46   27.70
  -3  -1   1  518.65   27.90
  -3  -1   1  450.15   26.50
  -3  -1   1  497.75   28.40
  -3  -1   1  478.35   26.90
  -3  -1   1  426.36   27.00
  -3  -1   1  433.66   27.60
  -3  -1   1  498.55   26.40
  -3  -1   1  458.85   25.20
   2   1  -1   60.99    6.60
   2   1  -1   53.39    6.40
   2   1  -1   61.79    4.90
   2   1  -1   45.60    6.10
   2   1  -1   53.89    5.40
  -2  -1   1   52.69    6.30
  -2  -1   1   61.59    5.20
  -2  -1   1   61.69    6.70
  -2  -1   1   60.09    6.00
  -2  -1   1   69.89    7.70
  -2  -1   1   53.99    5.60
   1   1  -1   -0.10    0.20
   1   1  -1   -0.20    0.40
  -1   1  -1  100.49    7.40
  -1   1  -1   86.69    6.10
  -1   1  -1  105.49    7.10
  -1   1  -1   92.39    6.30
  -1   1  -1   96.09    7.40
  -1   1  -1  104.49    7.30
  -1   1  -1   90.59    5.80
  -1   1  -1   97.69    7.00
  -1   1  -1  105.59    7.30
   1  -1   1   99.49    7.20
   1  -1   1   98.29    5.80
   1  -1   1   91.09    6.00
   1  -1   1  101.19    5.70
   1  -1   1   95.79    7.00
   1  -1   1   99.29    6.50
   1  -1   1  114.49    6.40
   1  -1   1   94.39    7.20
   1  -1   1   97.69    6.00
   1  -1   1   77.59    7.10
   1  -1   1   90.69    7.20
   1  -1   1  100.19    7.50
  -2   1  -1   97.39    6.70
  -2   1  -1   86.69    5.60
  -2   1  -1   95.99   10.40
  -2   1  -1   87.19    7.00
  -2   1  -1   98.49    8.90
  -2   1  -1   79.49    9.10
  -2   1  -1   73.79    5.80
  -2   1  -1   96.39    9.70
  -2   1  -1   96.89   10.30
  -2   1  -1  104.69   10.50
  -2   1  -1   90.19    7.10
  -2   1  -1   84.29    7.30
  -2   1  -1   94.49    7.50
  -2   1  -1   76.79    9.10
   2  -1   1   80.19    6.90
   2  -1   1   66.49    9.00
   2  -1   1  101.89    7.10
   2  -1   1   76.19    9.80
   2  -1   1   83.19    8.50
   2  -1   1   60.89    9.10
   2  -1   1   89.39    9.90
   2  -1   1   80.19    7.80
   2  -1   1   87.29    7.90
  -3   1  -1 2684.83  141.19
  -3   1  -1 2871.31  143.69
  -3   1  -1 2592.14  141.49
  -3   1  -1 2479.15  144.29
  -3   1  -1 2703.73  142.29
  -3   1  -1 2735.33  145.39
  -3   1  -1 2812.82  144.69
  -3   1  -1 2589.74  144.19
  -3   1  -1 2503.45  142.39
  -3   1  -1 2506.85  142.69
  -3   1  -1 2711.93  142.89
  -3   1  -1 2685.73  144.79
  -3   1  -1 2770.52  144.99
  -3   1  -1 2754.02  142.09
   3  -1   1 2707.83  143.59
   3  -1   1 2551.54  144.79
   3  -1   1 2897.41  142.59
   3  -1   1 2972.80  142.49
   3  -1   1 2773.42  143.09
   3  -1   1 2801.72  143.09
   3  -1   1 2500.35  144.39
  -4   1  -1 2387.56  128.99
  -4   1  -1 2369.26  128.99
  -4   1  -1 2275.37  127.99
  -4   1  -1 2254.87  130.49
  -4   1  -1 2410.96  127.69
  -4   1  -1 2357.86  126.09
  -4   1  -1 2428.56  131.49
  -4   1  -1 2252.87  128.29
  -4   1  -1 2420.36  129.89
  -4   1  -1 2377.66  131.49
  -4   1  -1 2341.27  126.09
  -4   1  -1 2372.06  132.09
  -4   1  -1 2436.66  126.79
  -4   1  -1 2171.48  130.59
  -4   1  -1 2521.15  131.39
  -4   1  -1 2225.78  127.09
   4  -1   1 2502.15  130.09
   4  -1   1 2642.04  128.39
   4  -1   1 2556.54  131.79
   4  -1   1 2678.73  129.59
   4  -1   1 2508.85  129.39
   4  -1   1 2624.44  128.59
  -5   1  -1    3.10    6.10
  -5   1  -1    2.50    7.00
  -5   1  -1    6.20    5.80
  -5   1  -1    8.40    2.90
  -5   1  -1    6.00    2.10
  -5   1  -1    3.20    4.80
  -5   1  -1    5.40    4.90
  -5   1  -1    2.00    6.90
  -5   1  -1    4.30    6.90
  -5   1  -1    7.80    3.30
  -5   1  -1    4.30    3.60
  -5   1  -1    3.90    3.10
  -5   1  -1    5.10    4.10
  -5   1  -1    4.60    6.20
  -5   1  -1    4.50    2.00
  -5   1  -1   -0.30    6.10
   5  -1   1    0.30    5.00
   5  -1   1   -2.80    4.90
   5  -1   1    6.00    3.70
   5  -1   1    8.80    4.40
  -6   1  -1  844.92   56.19
  -6   1  -1 1010.20   52.99
  -6   1  -1  865.61   50.49
  -6   1  -1  913.11   56.29
  -6   1  -1  916.31   55.39
  -6   1  -1  847.32   51.09
  -6   1  -1  986.60   54.49
  -6   1  -1 1010.60   51.09
  -6   1  -1  925.11   55.89
  -6   1  -1  927.31   53.29
  -6   1  -1  947.31   57.39
  -6   1  -1  973.20   50.69
  -6   1  -1  991.10   59.09
  -6   1  -1 1038.90   52.09
  -6   1  -1  916.01   57.79
  -6   1  -1  914.21   60.59
   6  -1   1  948.81   55.09
   6  -1   1  851.11   53.79
   6  -1   1  996.70   55.99
   6  -1   1  973.40   54.79
   6  -1   1  986.10   54.99
  -7   1  -1  459.85   33.70
  -7   1  -1  418.76   30.30
  -7   1  -1  406.76   31.50
  -7   1  -1  429.96   28.20
  -7   1  -1  433.86   23.80
  -7   1  -1  445.16   32.80
  -7   1  -1  485.45   30.70
  -7   1  -1  423.16   28.00
  -7   1  -1  383.56   24.00
  -7   1  -1  379.06   24.60
  -7   1  -1  408.86   23.80
  -7   1  -1  437.46   32.10
  -7   1  -1  385.26   24.40
  -7   1  -1  410.06   30.50
   7  -1   1  424.86   26.90
   7  -1   1  397.86   28.30
   7  -1   1  421.46   26.20
   7  -1   1  430.76   29.00
  -8   1  -1   31.60   11.30
  -8   1  -1   30.20    5.30
  -8   1  -1   28.20   10.80
  -8   1  -1   29.80    9.20
  -8   1  -1   34.60    5.70
  -8   1  -1   33.10    5.00
  -8   1  -1   26.40    5.00
  -8   1  -1   34.20    7.20
  -8   1  -1   28.20   11.20
  -8   1  -1   24.30   11.20
   8  -1   1   23.80    7.30
   8  -1   1   26.30    9.60
   8  -1   1   17.60    8.80
  -9   1  -1    4.80    3.70
  -9   1  -1   -3.20    8.40
  -9   1  -1    5.00    8.90
  -9   1  -1    2.20    4.10
  -9   1  -1    7.40    3.80
  -9   1  -1   28.60   13.80
  -9   1  -1    2.90    4.30
  -9   1  -1    1.20    8.70
   9  -1   1    0.80    7.30
   9  -1   1   17.00    9.10
   9  -1   1    3.80    5.80
 -10   1  -1   56.29   13.80
 -10   1  -1   46.00   13.40
 -10   1  -1   49.20    6.20
 -10   1  -1   45.80   13.80
 -10   1  -1   48.40    7.50
 -10   1  -1   56.99    7.30
 -10   1  -1   44.50    6.60
 -10   1  -1   57.69    7.40
  10  -1   1   38.00   13.80
  10  -1   1   40.20   12.00
  10  -1   1   37.20    9.70
 -11   1  -1   27.60    5.40
 -11   1  -1   26.10    3.90
 -11   1  -1   35.70    7.10
 -11   1  -1   34.00   11.90
 -11   1  -1   39.60   12.70
  11  -1   1   47.30   12.50
  11  -1   1   27.40    9.50
  11  -1   1   35.10   12.30
 -12   1  -1   33.50    6.90
 -12   1  -1   25.80    8.10
  12  -1   1   26.40   10.10
  12  -1   1   42.40   13.90
  12  -1   1   21.00   12.70
 -13   1  -1   -0.10    5.40
 -13   1  -1    2.20    9.10
  13  -1   1   17.20   14.10
  13   0  -1   64.39   14.10
 -13   0   1   46.60    6.50
 -13   0   1   48.00    8.80
 -13   0   1   51.39   14.30
  12   0  -1   -2.10   10.40
  12   0  -1    2.30   11.20
  12   0  -1    1.30    7.80
 -12   0   1   16.90   11.10
 -12   0   1    5.20    4.90
 -12   0   1  -15.00    5.20
 -12   0   1    0.20    5.10
 -12   0   1    7.10    5.70
  11   0  -1    2.40    6.90
  11   0  -1   -0.90    8.60
  11   0  -1  -18.10    8.20
 -11   0   1    9.30    9.50
 -11   0   1    5.70    5.20
 -11   0   1   24.10    9.90
 -11   0   1    6.10    4.80
 -11   0   1   10.40    5.00
 -11   0   1    4.00    5.70
  10   0  -1   29.90   11.40
  10   0  -1   31.90    9.60
  10   0  -1   26.90    8.60
 -10   0   1   16.60   10.80
 -10   0   1   20.30   10.20
 -10   0   1   33.90    7.30
 -10   0   1   34.70    7.40
 -10   0   1   60.19   22.70
 -10   0   1   27.30    6.90
 -10   0   1   37.10   11.30
 -10   0   1   32.90    6.80
   9   0  -1   -1.40    7.70
   9   0  -1    2.80    6.50
   9   0  -1   -4.50    5.00
   9   0  -1   -2.00    8.10
  -9   0   1    0.50    3.70
  -9   0   1   -4.40    8.30
  -9   0   1    0.30    9.70
  -9   0   1   -2.40    3.70
  -9   0   1   -2.00    4.90
  -9   0   1   12.00    9.00
  -9   0   1    2.50    1.80
  -9   0   1    1.10    4.10
  -9   0   1   17.90    8.50
   8   0  -1   61.49   12.50
   8   0  -1   53.19   11.80
   8   0  -1   61.99    9.30
   8   0  -1   46.80    9.50
  -8   0   1   66.39    7.60
  -8   0   1   54.69    5.50
  -8   0   1   64.99   12.80
  -8   0   1   46.60   12.00
  -8   0   1   44.10    6.40
  -8   0   1   65.79   14.20
  -8   0   1   57.99    7.30
  -8   0   1   38.40    7.30
  -8   0   1   57.99   13.90
   7   0  -1    2.50    2.70
   7   0  -1   -4.10    4.00
   7   0  -1    1.70    6.70
   7   0  -1   10.10    6.00
   7   0  -1    0.10    5.90
  -7   0   1    5.10    4.50
  -7   0   1    6.90    5.90
  -7   0   1    2.30    2.40
  -7   0   1    1.80    3.60
  -7   0   1    8.10    8.30
  -7   0   1    2.90    3.10
  -7   0   1    7.20    7.30
  -7   0   1   -5.60    6.70
  -7   0   1   11.20    7.70
  -7   0   1   15.80    9.40
  -7   0   1    2.80    3.60
  -7   0   1    5.30    8.90
  -7   0   1    5.60    6.90
   6   0  -1   48.30    9.20
   6   0  -1   36.60    5.00
   6   0  -1   30.70    6.90
   6   0  -1   37.20    6.40
   6   0  -1   45.20    8.70
   6   0  -1   42.30    4.90
  -6   0   1   37.30    5.10
  -6   0   1   44.70    8.40
  -6   0   1   47.00   10.80
  -6   0   1   38.00    7.60
  -6   0   1   32.00    4.00
  -6   0   1   34.30    4.50
  -6   0   1   32.70    9.20
  -6   0   1   25.70    5.20
  -6   0   1   32.50    8.30
  -6   0   1   40.10    5.10
  -6   0   1   33.50    8.60
  -6   0   1   39.70    8.70
  -6   0   1   19.10    9.00
   5   0  -1  122.19   10.60
   5   0  -1   93.39   12.60
   5   0  -1  102.59   11.10
   5   0  -1   99.79    8.20
   5   0  -1  104.79    8.00
   5   0  -1  101.79    9.10
  -5   0   1  109.49   11.90
  -5   0   1   99.39    7.70
  -5   0   1  105.09    7.30
  -5   0   1  131.29   15.20
  -5   0   1  103.49   14.00
  -5   0   1  109.59   10.70
  -5   0   1  115.49    8.10
  -5   0   1   80.29   10.80
  -5   0   1  103.09   14.40
  -5   0   1   89.19    8.30
  -5   0   1   93.89    7.10
  -5   0   1   81.99   10.60
  -5   0   1  110.29   11.00
   4   0  -1   55.79    7.00
   4   0  -1   34.30    6.90
   4   0  -1   60.29    6.50
   4   0  -1   50.49    5.70
   4   0  -1   57.69    5.60
   4   0  -1   48.50    7.50
  -4   0   1   44.30    4.30
  -4   0   1   45.50    7.70
  -4   0   1   57.29    7.90
  -4   0   1   52.89    9.80
  -4   0   1   44.20    4.20
  -4   0   1   49.80    5.10
  -4   0   1   49.00    8.40
  -4   0   1   49.99    7.90
  -4   0   1   51.69    4.80
  -4   0   1   67.69    8.10
  -4   0   1   44.60    8.70
  -4   0   1   45.70    5.60
   3   0  -1   16.40    4.50
   3   0  -1   19.40    3.50
   3   0  -1   19.70    4.60
   3   0  -1   31.90    3.70
   3   0  -1   23.50    3.50
   3   0  -1   23.20    4.40
  -3   0   1   17.00    2.60
  -3   0   1   23.10    5.30
  -3   0   1   22.70    4.70
  -3   0   1   24.70    2.60
  -3   0   1   19.30    3.30
  -3   0   1   17.50    4.70
  -3   0   1   23.10    5.20
  -3   0   1   21.40    3.10
  -3   0   1   32.20    7.00
  -3   0   1   30.40    5.10
   2   0  -1  302.17   19.80
   2   0  -1  322.77   19.40
   2   0  -1  320.57   19.70
   2   0  -1  307.77   18.80
   2   0  -1  382.96   18.80
   2   0  -1  335.97   18.80
   2   0  -1  317.07   19.70
  -2   0   1  375.66   20.00
  -2   0   1  304.07   19.60
  -2   0   1  331.17   18.70
  -2   0   1  332.47   18.60
  -2   0   1  339.87   18.00
  -2   0   1  361.86   20.00
  -2   0   1  326.77   19.50
  -2   0   1  363.56   20.20
  -2   0   1  320.87   18.70
  -2   0   1  320.07   19.60
   1   0  -1   21.70    2.20
   1   0  -1   15.90    2.10
   1   0  -1   12.30    1.80
  -1   0   1   16.50    1.80
  -1   0  -1  270.57   14.90
  -1   0  -1  280.27   15.40
  -1   0  -1  235.18   14.50
  -1   0  -1  265.17   15.60
  -1   0  -1  276.57   15.30
   1   0   1  253.47   14.80
   1   0   1  249.78   14.00
   1   0   1  255.47   13.90
   1   0   1  248.58   15.20
   1   0   1  239.18   14.30
   1   0   1  251.27   15.30
   1   0   1  281.47   14.60
   1   0   1  252.57   13.90
   1   0   1  269.87   14.60
  -2   0  -1 2812.22  146.49
  -2   0  -1 2965.90  148.29
  -2   0  -1 2739.13  146.29
  -2   0  -1 2711.63  146.29
  -2   0  -1 2717.53  146.79
  -2   0  -1 2968.60  148.59
  -2   0  -1 2871.81  148.89
  -2   0  -1 2737.23  146.19
  -2   0  -1 2993.50  147.09
  -2   0  -1 2712.63  146.69
  -2   0  -1 2722.03  145.89
  -2   0  -1 3028.40  147.69
   2   0   1 2662.03  146.99
   2   0   1 2478.35  147.29
   2   0   1 2725.33  146.29
   2   0   1 2662.23  146.49
   2   0   1 2595.74  146.89
   2   0   1 2811.72  148.29
   2   0   1 2832.12  146.09
   2   0   1 2694.33  148.39
   2   0   1 2923.61  146.29
   2   0   1 2980.40  146.69
  -3   0  -1 2046.00  114.99
  -3   0  -1 2318.87  117.59
  -3   0  -1 2100.49  114.39
  -3   0  -1 2157.68  115.69
  -3   0  -1 1980.10  114.79
  -3   0  -1 2093.59  115.49
  -3   0  -1 2172.68  118.19
  -3   0  -1 2115.79  114.79
  -3   0  -1 2169.18  116.39
  -3   0  -1 2094.49  114.49
  -3   0  -1 2091.79  113.99
  -3   0  -1 2308.97  117.99
  -3   0  -1 2069.09  114.09
   3   0   1 2007.00  117.19
   3   0   1 2304.97  114.89
   3   0   1 2034.10  116.29
   3   0   1 2207.38  115.99
   3   0   1 2336.07  114.89
   3   0   1 2306.87  115.29
   3   0   1 2308.17  114.49
   3   0   1 2210.88  115.79
   3   0   1 2356.66  114.39
  -4   0  -1  487.35   32.40
  -4   0  -1  526.45   29.00
  -4   0  -1  613.34   34.50
  -4   0  -1  476.85   29.80
  -4   0  -1  567.34   34.40
  -4   0  -1  501.55   34.10
  -4   0  -1  529.75   32.20
  -4   0  -1  472.15   29.70
  -4   0  -1  527.75   29.40
  -4   0  -1  522.55   29.40
  -4   0  -1  552.84   31.40
  -4   0  -1  511.05   28.90
   4   0   1  540.25   29.80
   4   0   1  589.54   30.20
   4   0   1  550.94   31.60
   4   0   1  549.54   29.10
   4   0   1  569.84   30.70
   4   0   1  550.14   31.80
   4   0   1  482.75   32.10
   4   0   1  479.65   33.60
  -5   0  -1   10.40    7.30
  -5   0  -1   16.30    7.60
  -5   0  -1    3.50    3.30
  -5   0  -1    8.00    7.10
  -5   0  -1   13.00    3.00
  -5   0  -1    7.80    6.00
  -5   0  -1    9.70    3.10
  -5   0  -1   15.30    5.40
  -5   0  -1    7.60    7.10
  -5   0  -1    6.60    4.10
  -5   0  -1   11.50    6.40
  -5   0  -1   12.30    6.50
  -5   0  -1    8.90    3.50
  -5   0  -1    7.40    2.70
   5   0   1    8.40    6.20
   5   0   1   16.90    5.10
   5   0   1    7.90    5.50
   5   0   1   11.60    3.70
   5   0   1    7.30    3.50
   5   0   1    6.50    2.90
  -6   0  -1  498.25   34.50
  -6   0  -1  556.54   36.50
  -6   0  -1  563.94   30.00
  -6   0  -1  509.15   37.00
  -6   0  -1  463.75   30.50
  -6   0  -1  508.75   36.00
  -6   0  -1  507.95   30.10
  -6   0  -1  493.85   29.80
  -6   0  -1  504.05   29.70
  -6   0  -1  547.55   31.30
  -6   0  -1  558.34   33.10
  -6   0  -1  470.15   34.70
  -6   0  -1  563.24   37.20
  -6   0  -1  551.94   34.60
   6   0   1  520.15   31.10
   6   0   1  575.24   35.00
   6   0   1  553.94   33.70
   6   0   1  573.04   34.00
   6   0   1  548.45   29.50
   6   0   1  555.94   29.90
  -7   0  -1  121.19   11.10
  -7   0  -1  107.99    9.90
  -7   0  -1  116.89    9.30
  -7   0  -1   98.99   14.70
  -7   0  -1  118.89    9.70
  -7   0  -1   99.29   16.40
  -7   0  -1  138.29   18.80
  -7   0  -1  131.79   16.70
  -7   0  -1  176.98   20.20
  -7   0  -1  168.18   21.10
  -7   0  -1  140.49   18.10
  -7   0  -1  112.09    9.20
  -7   0  -1  103.89   10.50
   7   0   1  124.69   14.50
   7   0   1  115.09    8.00
   7   0   1  129.69   12.30
   7   0   1  119.19   11.10
   7   0   1  145.19   15.90
  -8   0  -1  260.67   26.00
  -8   0  -1  254.87   16.70
  -8   0  -1  213.18   16.80
  -8   0  -1  236.88   23.60
  -8   0  -1  237.08   22.60
  -8   0  -1  225.58   22.60
  -8   0  -1  261.27   16.20
  -8   0  -1  239.48   16.50
  -8   0  -1  243.38   15.50
   8   0   1  245.38   21.50
   8   0   1  209.48   20.50
   8   0   1  284.57   19.70
  -9   0  -1   39.80    6.50
  -9   0  -1   34.70   10.40
  -9   0  -1   42.70   12.70
  -9   0  -1   40.20    6.80
  -9   0  -1   26.70   12.70
  -9   0  -1   41.40    7.10
  -9   0  -1   37.40    4.80
  -9   0  -1   17.90    6.10
   9   0   1   28.20   10.50
   9   0   1   15.40    8.70
   9   0   1   20.00    8.10
 -10   0  -1    8.20    2.50
 -10   0  -1   13.00    5.70
 -10   0  -1   19.90   10.80
 -10   0  -1    8.70    9.80
 -10   0  -1    5.10    5.40
  10   0   1  -10.80   12.40
  10   0   1    8.20    8.70
  10   0   1    6.50    6.40
 -11   0  -1   21.80    9.60
 -11   0  -1   -9.80    4.10
 -11   0  -1    2.20    5.40
 -11   0  -1   -0.40    4.20
 -11   0  -1   -1.90    5.00
 -11   0  -1    2.80    9.10
  11   0   1    3.40    7.60
  11   0   1   -8.50    9.10
  11   0   1    7.40   10.30
 -12   0  -1   27.60    6.00
 -12   0  -1   19.40    7.40
 -12   0  -1   13.60    6.10
 -12   0  -1   26.40    6.40
  12   0   1   14.70    8.30
  12   0   1   34.60   13.60
  12   0   1   29.70   12.90
 -13   0  -1    1.80    5.60
 -13   0  -1    8.30    3.70
 -13   0  -1    3.50    3.20
  13   0   1   -9.50    9.80
  13  -1  -1  -11.80    8.30
  13  -1  -1   -7.40   11.20
 -13   1   1   -0.40    9.40
 -13   1   1   14.20    5.80
 -13   1   1   -2.30    8.40
  12  -1  -1   64.69   13.30
  12  -1  -1   22.20   13.10
 -12   1   1   60.19    9.00
 -12   1   1   42.90    7.90
 -12   1   1   58.29   13.80
 -12   1   1   52.39    6.30
 -12   1   1   53.19   13.20
 -12   1   1   41.60    5.40
  11  -1  -1   12.50    8.60
  11  -1  -1    5.60    9.80
  11  -1  -1  -12.90    8.30
 -11   1   1    8.00    7.20
 -11   1   1   -2.00    7.90
 -11   1   1    8.10    4.50
 -11   1   1    3.80    9.70
 -11   1   1    4.90    7.50
  10  -1  -1   38.90   11.50
  10  -1  -1   48.70    9.80
  10  -1  -1   59.89   11.30
 -10   1   1   49.50    6.70
 -10   1   1   65.59   15.10
 -10   1   1   40.80    4.80
 -10   1   1   74.19   15.10
 -10   1   1   47.80    6.80
 -10   1   1   71.39   14.20
 -10   1   1   50.79    7.20
 -10   1   1   34.30   13.90
 -10   1   1   44.00    7.10
   9  -1  -1  150.78   19.30
   9  -1  -1  209.38   16.80
   9  -1  -1  177.28   19.20
   9  -1  -1  171.18   17.10
  -9   1   1  193.98   20.30
  -9   1   1  172.28   15.90
  -9   1   1  201.98   19.70
  -9   1   1  185.48   13.60
  -9   1   1  231.18   27.60
  -9   1   1  187.48   12.70
  -9   1   1  210.48   24.90
  -9   1   1  203.08   13.40
  -9   1   1  191.68   14.10
   8  -1  -1   12.20    5.70
   8  -1  -1    7.40    6.60
   8  -1  -1   13.20    8.50
   8  -1  -1   11.50    8.20
  -8   1   1   13.70    4.30
  -8   1   1   18.40    7.00
  -8   1   1   -1.30    8.70
  -8   1   1   15.60   11.10
  -8   1   1   16.60    4.00
  -8   1   1   15.10    8.90
  -8   1   1   14.90    7.60
  -8   1   1    5.70    3.60
  -8   1   1   19.30    8.90
  -8   1   1    8.10    3.80
  -8   1   1   22.30   10.00
  -8   1   1   11.30    4.70
  -8   1   1    9.30    3.70
   7  -1  -1  177.08   16.70
   7  -1  -1  181.18   16.70
   7  -1  -1  155.78   13.50
   7  -1  -1  154.98   14.60
  -7   1   1  174.18   16.30
  -7   1   1  159.48   19.30
  -7   1   1  180.08   11.10
  -7   1   1  202.68   17.50
  -7   1   1  164.68   19.10
  -7   1   1  161.88   15.40
  -7   1   1  151.78   11.40
  -7   1   1  186.98   17.30
  -7   1   1  162.48   15.50
  -7   1   1  172.28   18.50
  -7   1   1  163.38   12.00
  -7   1   1  166.88   11.30
  -7   1   1  169.28   11.40
  -7   1   1  167.28   18.90
   6  -1  -1   94.19    9.40
   6  -1  -1  111.29   11.60
   6  -1  -1  114.69   13.10
   6  -1  -1  102.49   11.90
  -6   1   1  105.39   13.40
  -6   1   1   77.89   12.20
  -6   1   1  100.69   14.70
  -6   1   1   99.29   11.70
  -6   1   1   77.39    7.70
  -6   1   1   98.09   16.40
  -6   1   1   91.09    7.60
  -6   1   1  109.49   15.20
  -6   1   1   76.59    9.00
  -6   1   1  100.99    7.20
  -6   1   1   81.89   12.80
  -6   1   1   99.59    6.70
  -6   1   1   87.59   12.30
  -6   1   1  102.19    7.40
   5  -1  -1  213.98   15.50
   5  -1  -1  217.08   13.80
   5  -1  -1  193.08   15.20
   5  -1  -1  206.28   14.60
  -5   1   1  164.18   15.40
  -5   1   1  173.18   16.90
  -5   1   1  182.48   14.90
  -5   1   1  176.48   16.90
  -5   1   1  173.68   11.80
  -5   1   1  193.88   14.90
  -5   1   1  185.08   15.60
  -5   1   1  179.08   14.00
  -5   1   1  160.98   13.00
  -5   1   1  186.88   11.90
  -5   1   1  168.28   15.40
  -5   1   1  176.78   11.00
  -5   1   1  186.98   17.80
  -5   1   1  175.88   16.40
  -5   1   1  201.38   10.80
  -5   1   1  197.28   11.60
   4  -1  -1  154.28   12.60
   4  -1  -1  163.98   12.80
   4  -1  -1  167.78   12.40
   4  -1  -1  167.28    9.00
   4  -1  -1  160.28    9.00
   4  -1  -1  150.48   13.40
   4  -1  -1  176.48   11.60
  -4   1   1  131.79   12.70
  -4   1   1  163.48   14.70
  -4   1   1  151.18   13.10
  -4   1   1  161.78   14.90
  -4   1   1  154.78    9.80
  -4   1   1  157.98   14.10
  -4   1   1  156.18    8.80
  -4   1   1  149.99   10.00
  -4   1   1  167.28   12.70
  -4   1   1  168.78   11.50
  -4   1   1  157.08    9.30
  -4   1   1  155.28   14.50
  -4   1   1  146.79   12.70
  -4   1   1  169.98   12.20
  -4   1   1  127.99   12.60
   3  -1  -1   37.10    6.70
   3  -1  -1   44.00    6.20
   3  -1  -1   50.39    3.30
   3  -1  -1   26.10    5.30
   3  -1  -1   40.00    5.00
   3  -1  -1   37.60    3.40
   3  -1  -1   45.30    7.40
   3  -1  -1   32.20    5.00
  -3   1   1   42.40    6.00
  -3   1   1   45.70    7.10
  -3   1   1   41.10    6.90
  -3   1   1   41.10    7.20
  -3   1   1   42.50    7.60
  -3   1   1   34.00    3.80
  -3   1   1   44.00    5.00
  -3   1   1   37.70    3.90
  -3   1   1   43.30    6.70
  -3   1   1   44.40    6.50
  -3   1   1   44.70    5.70
  -3   1   1   48.10    6.10
  -3   1   1   45.00    6.50
   2  -1  -1 1424.06   79.49
   2  -1  -1 1380.46   78.49
   2  -1  -1 1447.76   79.39
   2  -1  -1 1397.26   78.89
   2  -1  -1 1382.06   79.39
   2  -1  -1 1652.13   77.69
   2  -1  -1 1411.36   78.79
   2  -1  -1 1356.46   78.89
   2  -1  -1 1584.64   77.89
  -2   1   1 1508.35   79.29
  -2   1   1 1534.75   78.99
  -2   1   1 1507.05   79.89
  -2   1   1 1491.05   79.89
  -2   1   1 1601.94   79.19
  -2   1   1 1429.76   77.89
  -2   1   1 1464.45   78.99
  -2   1   1 1484.85   78.09
  -2   1   1 1428.96   79.29
  -2   1   1 1635.14   78.99
  -2   1   1 1519.65   79.79
  -2   1   1 1422.96   79.39
   1  -1  -1  319.47   19.30
   1  -1  -1  337.77   19.90
   1  -1  -1  352.56   19.40
   1  -1  -1  421.86   20.50
   1  -1  -1  357.06   20.20
   1  -1  -1  405.66   20.20
   1  -1  -1  389.06   19.90
   1  -1  -1  384.86   20.00
   1  -1  -1  362.86   20.10
  -1   1   1  382.86   20.10
  -1   1   1  391.46   20.00
  -1   1   1  344.67   19.80
  -1   1   1  313.97   19.90
  -1  -1  -1 2922.51  159.38
  -1  -1  -1 3205.38  159.58
  -1  -1  -1 2961.60  158.68
   1   1   1 3036.00  159.08
   1   1   1 2944.31  159.28
   1   1   1 3095.59  158.68
  -2  -1  -1  391.16   22.70
  -2  -1  -1  367.06   21.40
  -2  -1  -1  339.87   19.80
  -2  -1  -1  337.97   19.30
  -2  -1  -1  366.56   20.10
  -2  -1  -1  343.67   19.80
  -2  -1  -1  344.87   19.30
  -2  -1  -1  322.37   20.90
  -2  -1  -1  373.66   22.30
   2   1   1  346.57   19.80
   2   1   1  336.77   21.10
   2   1   1  380.76   21.20
   2   1   1  339.87   20.60
   2   1   1  361.16   19.40
   2   1   1  351.46   19.60
   2   1   1  359.26   19.60
   2   1   1  325.37   22.00
   2   1   1  350.46   19.30
  -3  -1  -1  225.78   13.90
  -3  -1  -1  220.78   14.80
  -3  -1  -1  221.88   13.50
  -3  -1  -1  243.58   15.90
  -3  -1  -1  218.88   13.40
  -3  -1  -1  232.68   17.30
  -3  -1  -1  223.98   13.00
  -3  -1  -1  250.27   17.20
  -3  -1  -1  207.68   13.30
   3   1   1  217.58   14.30
   3   1   1  234.58   15.00
   3   1   1  205.98   14.70
   3   1   1  238.18   13.80
   3   1   1  205.98   16.80
   3   1   1  255.67   13.60
   3   1   1  242.38   14.20
   3   1   1  238.08   13.20
   3   1   1  217.38   12.90
   3   1   1  214.28   14.90
   3   1   1  198.98   15.40
  -4  -1  -1    3.40    7.20
  -4  -1  -1   -0.40    4.20
  -4  -1  -1   -0.10    2.70
  -4  -1  -1   -0.60    2.80
  -4  -1  -1    3.60    6.80
  -4  -1  -1    0.30    3.20
  -4  -1  -1    4.00    5.90
  -4  -1  -1    3.60    2.70
  -4  -1  -1   -1.70    2.00
   4   1   1    2.90    3.10
   4   1   1    2.40    4.30
   4   1   1   -0.90    4.80
   4   1   1    0.00    2.90
   4   1   1   -1.60    3.30
   4   1   1    5.20    5.60
   4   1   1    0.00    2.00
   4   1   1   -2.20    4.90
  -5  -1  -1  544.35   30.30
  -5  -1  -1  451.05   31.20
  -5  -1  -1  561.44   30.80
  -5  -1  -1  529.15   30.50
  -5  -1  -1  557.54   30.20
  -5  -1  -1  542.15   29.50
  -5  -1  -1  536.95   33.60
  -5  -1  -1  573.34   36.00
  -5  -1  -1  532.95   35.40
   5   1   1  540.15   31.30
   5   1   1  559.04   33.10
   5   1   1  512.95   33.60
   5   1   1  501.05   30.40
   5   1   1  544.05   30.40
   5   1   1  521.05   31.30
  -6  -1  -1  843.72   48.20
  -6  -1  -1  762.62   49.99
  -6  -1  -1  762.82   47.70
  -6  -1  -1  798.22   43.80
  -6  -1  -1  816.92   49.80
  -6  -1  -1  784.82   50.89
  -6  -1  -1  803.92   43.60
  -6  -1  -1  724.13   42.50
  -6  -1  -1  686.33   44.40
  -6  -1  -1  763.82   44.00
   6   1   1  781.22   43.60
   6   1   1  779.52   44.10
   6   1   1  821.52   45.50
   6   1   1  816.02   47.10
   6   1   1  861.71   47.50
   6   1   1  769.42   47.70
  -7  -1  -1   57.79    8.90
  -7  -1  -1   91.39   15.70
  -7  -1  -1   79.39    8.20
  -7  -1  -1   74.99    8.70
  -7  -1  -1   88.19    6.90
  -7  -1  -1   80.99   13.80
  -7  -1  -1   75.19    9.10
  -7  -1  -1   97.79   16.40
  -7  -1  -1   89.99   16.50
  -7  -1  -1   98.29   18.00
   7   1   1   81.79    9.20
   7   1   1  103.29   11.40
   7   1   1   76.69   12.40
   7   1   1   77.99   12.40
   7   1   1   78.79    8.00
   7   1   1   80.39    8.90
  -8  -1  -1   11.40    5.90
  -8  -1  -1   11.40    5.20
  -8  -1  -1   29.50   10.20
  -8  -1  -1    7.70    9.60
  -8  -1  -1    8.90    8.70
  -8  -1  -1   13.50    6.10
  -8  -1  -1   16.60    9.80
  -8  -1  -1   21.40    3.30
  -8  -1  -1    4.40    3.90
  -8  -1  -1   16.30    5.40
   8   1   1   10.20    4.40
   8   1   1   20.10    4.60
   8   1   1   17.40    7.40
   8   1   1   35.50    6.80
   8   1   1   19.50    8.60
   8   1   1   24.60    9.90
  -9  -1  -1   99.29   18.70
  -9  -1  -1   92.69   11.60
  -9  -1  -1   93.49   16.80
  -9  -1  -1  134.89   21.50
  -9  -1  -1   67.39   16.10
  -9  -1  -1   84.09   10.20
  -9  -1  -1   66.39   10.00
  -9  -1  -1  104.09   17.30
   9   1   1   48.90    9.90
   9   1   1   70.99   13.60
   9   1   1   53.79   12.70
 -10  -1  -1  129.79   19.80
 -10  -1  -1  124.49   12.20
 -10  -1  -1  129.39   13.40
 -10  -1  -1  145.09   19.20
  10   1   1  105.79   17.10
  10   1   1  169.78   20.60
  10   1   1  138.79   15.10
 -11  -1  -1    7.40    5.50
 -11  -1  -1    8.00    6.20
 -11  -1  -1   -1.10    6.00
 -11  -1  -1    8.50    5.80
 -11  -1  -1   16.70    9.80
 -11  -1  -1   22.90   10.30
  11   1   1   -5.10   10.10
  11   1   1    7.10    8.00
  11   1   1   -2.90    8.80
 -12  -1  -1    4.60    5.40
 -12  -1  -1   12.80    8.30
 -12  -1  -1    1.20    6.50
 -12  -1  -1    7.00    6.00
  12   1   1   13.40   11.80
  12   1   1    2.10   11.40
  12   1   1   -3.10    8.20
 -13  -1  -1   11.80    6.70
 -13  -1  -1   11.70    6.30
  13   1   1    6.00   12.90
  13   1   1   12.30   11.40
  13   1   1    3.50    8.70
 -13   2   1   20.30    7.90
 -13   2   1   34.50    6.70
 -13   2   1   18.50   11.00
  12  -2  -1  -11.70    8.90
  12  -2  -1   -0.70    7.40
 -12   2   1    7.60    5.00
 -12   2   1   25.20   10.20
  11  -2  -1   31.90   10.00
  11  -2  -1   34.50   12.40
 -11   2   1   25.80   10.70
 -11   2   1   34.50    6.10
 -11   2   1   45.90   14.40
 -11   2   1   33.70   11.80
 -11   2   1   25.90    5.60
 -11   2   1   23.70    4.50
  10  -2  -1    3.90   10.00
  10  -2  -1   -7.60    6.60
  10  -2  -1    1.60    6.70
  10  -2  -1   -1.80    8.00
 -10   2   1    7.40    8.40
 -10   2   1    7.30    9.20
 -10   2   1   -3.50   14.80
 -10   2   1    2.80    3.30
 -10   2   1    4.40    9.00
 -10   2   1    4.00    3.70
 -10   2   1   -4.90    3.40
 -10   2   1    7.20    9.70
 -10   2   1    8.10    8.00
 -10   2   1    0.50    3.30
   9  -2  -1   21.70    7.60
   9  -2  -1   17.60    9.20
   9  -2  -1   19.30    9.60
   9  -2  -1   15.90    7.60
  -9   2   1   19.10    4.40
  -9   2   1    5.20    9.00
  -9   2   1   22.50    9.50
  -9   2   1   16.40    8.70
  -9   2   1   40.60   14.00
  -9   2   1   25.00   11.20
  -9   2   1   15.30    4.40
  -9   2   1   12.90    3.80
  -9   2   1   17.20    3.70
  -9   2   1   13.70   10.70
  -9   2   1   19.10    4.40
  -9   2   1   12.80    9.30
   8  -2  -1   85.79   11.70
   8  -2  -1   96.79   14.40
   8  -2  -1  113.09   12.70
   8  -2  -1   82.69   13.10
  -8   2   1   89.59    7.10
  -8   2   1  145.29   19.90
  -8   2   1   98.09   15.00
  -8   2   1  100.09   17.30
  -8   2   1  120.39   17.50
  -8   2   1   85.29    7.20
  -8   2   1   80.79    8.90
  -8   2   1   83.39   13.00
  -8   2   1  109.69   14.30
  -8   2   1   86.29    7.60
  -8   2   1  109.89   16.00
  -8   2   1   89.49    8.00
  -8   2   1   93.69   15.00
  -8   2   1   80.09   16.50
   7  -2  -1   57.19   10.70
   7  -2  -1   50.39    8.60
   7  -2  -1   78.79   11.50
   7  -2  -1   55.79    8.30
  -7   2   1   77.59   13.70
  -7   2   1   66.19   13.10
  -7   2   1   59.99    6.10
  -7   2   1   53.29    5.20
  -7   2   1   83.39   11.80
  -7   2   1   57.19    9.30
  -7   2   1   60.69   11.60
  -7   2   1   61.59    7.00
  -7   2   1   51.09   10.90
  -7   2   1   43.60   11.70
  -7   2   1   62.49   13.70
  -7   2   1   45.80   12.10
  -7   2   1   56.79    4.80
  -7   2   1   53.69    5.30
  -7   2   1   61.89    8.80
  -7   2   1   67.89   10.60
   6  -2  -1  641.64   37.00
   6  -2  -1  567.14   35.00
   6  -2  -1  630.74   35.80
   6  -2  -1  629.54   36.90
  -6   2   1  618.04   32.30
  -6   2   1  587.04   35.70
  -6   2   1  530.75   39.00
  -6   2   1  531.65   37.80
  -6   2   1  585.54   35.10
  -6   2   1  567.04   31.80
  -6   2   1  619.74   33.70
  -6   2   1  631.04   38.90
  -6   2   1  601.64   31.70
  -6   2   1  566.34   37.20
  -6   2   1  581.44   37.80
   5  -2  -1  743.43   44.90
   5  -2  -1  847.42   42.60
   5  -2  -1  808.42   43.80
   5  -2  -1  815.52   43.70
   5  -2  -1  820.92   43.00
  -5   2   1  750.02   42.20
  -5   2   1  708.93   44.70
  -5   2   1  699.23   45.20
  -5   2   1  674.63   43.90
  -5   2   1  695.53   39.80
  -5   2   1  739.83   39.70
  -5   2   1  708.73   45.70
  -5   2   1  714.13   43.10
  -5   2   1  746.83   42.70
  -5   2   1  693.53   43.40
  -5   2   1  676.23   44.80
  -5   2   1  727.03   44.10
  -5   2   1  772.02   43.30
   4  -2  -1  835.02   44.40
   4  -2  -1  787.92   41.70
   4  -2  -1  778.12   42.60
   4  -2  -1  756.42   44.00
   4  -2  -1  782.32   42.10
   4  -2  -1  818.92   42.90
  -4   2   1  709.83   39.70
  -4   2   1  718.93   43.60
  -4   2   1  705.53   44.40
  -4   2   1  706.73   43.80
  -4   2   1  733.23   42.30
  -4   2   1  710.63   39.60
  -4   2   1  719.73   44.30
  -4   2   1  760.62   42.60
  -4   2   1  680.43   43.10
  -4   2   1  776.62   41.70
  -4   2   1  733.93   42.80
  -4   2   1  744.03   42.00
  -4   2   1  717.83   43.10
  -4   2   1  693.83   42.00
   3  -2  -1 1840.62  100.09
   3  -2  -1 1967.60  100.69
   3  -2  -1 1902.31   98.99
   3  -2  -1 2002.00  100.29
   3  -2  -1 1805.92   98.39
   3  -2  -1 1860.51   98.59
   3  -2  -1 1900.21  100.09
  -3   2   1 1847.52   98.69
  -3   2   1 1781.42   99.79
  -3   2   1 1783.62   99.99
  -3   2   1 1829.72   97.19
  -3   2   1 1826.42   98.79
  -3   2   1 1809.92   98.89
  -3   2   1 1829.72   96.99
  -3   2   1 1861.21   99.79
  -3   2   1 1909.21   99.69
  -3   2   1 1787.92   98.89
  -3   2   1 2021.20   98.59
  -3   2   1 1683.83   99.99
  -3   2   1 1724.03   99.49
  -3   2   1 1804.42   98.59
   2  -2  -1 2419.26  113.49
   2  -2  -1 2052.39  114.19
   2  -2  -1 2300.17  112.39
   2  -2  -1 2286.27  112.79
   2  -2  -1 2025.50  113.79
   2  -2  -1 2018.30  113.99
   2  -2  -1 1973.40  113.09
   2  -2  -1 2006.80  112.99
   2  -2  -1 2088.79  113.99
   2  -2  -1 2104.99  114.19
  -2   2   1 2278.27  113.39
  -2   2   1 2341.17  113.29
  -2   2   1 2261.07  114.19
  -2   2   1 2155.58  113.19
  -2   2   1 2005.80  113.79
  -2   2   1 2025.10  113.79
  -2   2   1 2064.09  112.69
  -2   2   1 2344.77  114.19
  -2   2   1 2288.97  111.79
  -2   2   1 2227.28  113.49
  -2   2   1 2041.80  113.99
  -2   2   1 1980.10  112.29
  -2   2   1 1998.50  113.59
  -2   2   1 2146.19  111.89
  -2   2   1 2029.20  113.19
   1  -2  -1 1464.65   73.29
   1  -2  -1 1310.97   73.09
   1  -2  -1 1357.66   73.19
   1  -2  -1 1382.76   72.79
  -1   2   1 1376.96   73.09
  -1   2   1 1399.56   72.89
  -1   2   1 1450.55   73.19
  -1   2   1 1401.06   73.29
  -1   2   1 1274.87   72.99
  -1   2   1 1513.25   73.29
  -1   2   1 1292.67   73.19
  -1   2   1 1385.66   73.69
   0  -2  -1    3.20    2.30
   0  -2  -1    3.00    3.40
   0  -2  -1    0.80    1.80
   0  -2  -1    2.10    1.00
   0  -2  -1    3.50    2.50
   0  -2  -1    8.00    2.80
   0   2   1    2.80    1.10
   0   2   1    3.80    2.30
   0   2   1    5.40    1.90
   0   2   1    1.60    2.90
   0   2   1    5.00    2.50
  -3  -2  -1  634.64   35.80
  -3  -2  -1  681.83   38.50
  -3  -2  -1  650.73   36.90
  -3  -2  -1  658.63   37.30
  -3  -2  -1  647.84   37.00
  -3  -2  -1  644.04   38.30
  -3  -2  -1  687.03   39.60
   3   2   1  715.63   36.70
   3   2   1  688.03   36.10
   3   2   1  677.73   36.00
   3   2   1  612.64   38.30
   3   2   1  682.33   38.60
   3   2   1  746.73   36.80
   3   2   1  611.44   37.80
  -4  -2  -1 2595.04  146.89
  -4  -2  -1 2736.93  145.59
  -4  -2  -1 2716.43  147.29
  -4  -2  -1 2852.01  149.19
  -4  -2  -1 2638.74  148.09
  -4  -2  -1 2632.74  146.79
  -4  -2  -1 2786.42  150.38
  -4  -2  -1 2800.32  150.88
   4   2   1 2867.61  148.59
   4   2   1 2810.22  146.19
   4   2   1 2873.71  147.39
   4   2   1 2946.91  146.39
   4   2   1 2686.43  148.39
   4   2   1 2811.32  147.29
   4   2   1 2841.72  146.19
   4   2   1 2918.21  148.59
   4   2   1 2565.34  148.79
   4   2   1 2833.52  145.79
  -5  -2  -1  870.31   52.59
  -5  -2  -1  957.80   54.39
  -5  -2  -1 1005.90   52.09
  -5  -2  -1  953.90   51.39
  -5  -2  -1  934.21   51.49
  -5  -2  -1  985.10   56.19
  -5  -2  -1  924.31   49.70
  -5  -2  -1  975.20   56.79
   5   2   1  849.41   53.89
   5   2   1  929.81   49.50
   5   2   1  941.11   52.99
   5   2   1  980.80   53.99
   5   2   1  930.01   51.59
   5   2   1  914.11   50.79
   5   2   1  965.40   53.69
   5   2   1  885.71   49.70
   5   2   1  835.22   51.69
  -6  -2  -1    3.10    7.60
  -6  -2  -1   13.00    7.30
  -6  -2  -1    3.30    5.30
  -6  -2  -1    6.30    4.40
  -6  -2  -1    6.30    2.00
  -6  -2  -1    5.90    4.00
  -6  -2  -1    2.60    4.10
  -6  -2  -1    9.90    7.90
   6   2   1    8.60    7.00
   6   2   1    6.10    5.20
   6   2   1    2.70    3.20
   6   2   1   17.80    7.10
   6   2   1   15.70    6.90
   6   2   1    5.40    5.20
   6   2   1    8.00    4.20
  -7  -2  -1  199.68   15.30
  -7  -2  -1  179.28   16.00
  -7  -2  -1  219.78   15.60
  -7  -2  -1  211.78   19.30
  -7  -2  -1  221.58   24.70
  -7  -2  -1  198.18   14.70
  -7  -2  -1  203.88   19.70
  -7  -2  -1  223.18   22.00
  -7  -2  -1  168.08   20.40
   7   2   1  202.48   16.00
   7   2   1  183.68   14.40
   7   2   1  211.18   16.50
   7   2   1  191.38   16.00
   7   2   1  191.28   18.40
   7   2   1  209.28   19.00
  -8  -2  -1    2.00    7.90
  -8  -2  -1   -2.60    5.50
  -8  -2  -1   -2.20    4.80
  -8  -2  -1    6.70    8.40
  -8  -2  -1    3.60    4.40
  -8  -2  -1   -2.00    3.90
  -8  -2  -1   18.70    8.30
  -8  -2  -1    0.10    7.40
  -8  -2  -1   -3.90    7.10
  -8  -2  -1    4.00    5.00
   8   2   1   -1.30    4.20
   8   2   1    1.40    4.70
   8   2   1    8.70    6.20
   8   2   1    2.20    4.90
   8   2   1    9.50    8.50
   8   2   1    2.30    7.70
  -9  -2  -1    1.00   11.40
  -9  -2  -1   -2.30    9.40
  -9  -2  -1   -1.90    6.50
  -9  -2  -1   -2.20    8.50
  -9  -2  -1   14.10    9.80
  -9  -2  -1    1.30    5.90
  -9  -2  -1   -9.20    8.50
  -9  -2  -1    5.90    5.40
  -9  -2  -1   25.90   10.90
  -9  -2  -1    5.00    9.60
  -9  -2  -1    4.40    6.00
   9   2   1   -0.40    8.00
   9   2   1   10.30    2.50
   9   2   1    2.40    8.20
   9   2   1   12.00    7.30
 -10  -2  -1    6.10    6.40
 -10  -2  -1   20.20    9.10
 -10  -2  -1   12.00    9.10
 -10  -2  -1   -1.30    5.30
 -10  -2  -1   -1.30    5.80
 -10  -2  -1    0.80    6.50
  10   2   1   -3.50    8.40
  10   2   1   20.90   10.60
  10   2   1    3.80    6.20
 -11  -2  -1   75.49   11.80
 -11  -2  -1   65.29   11.30
 -11  -2  -1   74.39   16.20
 -11  -2  -1   98.89   16.70
 -11  -2  -1   74.89   11.00
  11   2   1   95.09   18.30
  11   2   1   45.20   14.30
  11   2   1   73.79   19.00
 -12  -2  -1    3.80    8.10
 -12  -2  -1   12.80    8.00
 -12  -2  -1   13.60    6.80
 -12  -2  -1    9.80    6.80
  12   2   1   16.40    8.90
  12   2   1    4.30   12.10
  12   2   1    1.00   11.20
 -13   3   1   -5.10    7.90
 -13   3   1    3.30    5.10
 -12   3   1   -3.90    8.50
 -12   3   1    2.60    4.40
 -12   3   1   10.70    3.80
 -12   3   1    1.00    3.80
  11  -3  -1    8.90    8.10
 -11   3   1   -2.20    3.20
 -11   3   1    6.80    4.30
 -11   3   1   -4.60    8.60
 -11   3   1   -7.50    7.00
 -11   3   1   -1.20    3.00
 -11   3   1  -10.60    8.10
  10  -3  -1   21.00    8.70
  10  -3  -1   22.20   10.10
 -10   3   1   20.50    4.00
 -10   3   1   -1.10   10.20
 -10   3   1   25.50   11.60
 -10   3   1   15.60    8.80
 -10   3   1   22.40    5.60
 -10   3   1   14.10   11.30
 -10   3   1   17.70    4.40
 -10   3   1   15.20    8.30
 -10   3   1   15.10    9.70
 -10   3   1   32.10   11.10
 -10   3   1   23.80   12.50
 -10   3   1   46.80   22.00
 -10   3   1   22.20    9.50
   9  -3  -1 1321.47   75.09
   9  -3  -1 1325.37   75.79
   9  -3  -1 1180.98   76.39
  -9   3   1 1378.16   79.49
  -9   3   1 1378.16   80.89
  -9   3   1 1359.86   78.89
  -9   3   1 1435.56   82.59
  -9   3   1 1295.27   81.99
  -9   3   1 1336.07   77.09
  -9   3   1 1290.97   78.59
  -9   3   1 1343.77   83.39
  -9   3   1 1381.56   76.99
  -9   3   1 1291.87   76.89
  -9   3   1 1311.57   70.39
  -9   3   1 1301.77   70.69
  -9   3   1 1225.28   72.49
   8  -3  -1   96.19   12.40
   8  -3  -1  119.79   14.90
   8  -3  -1  115.29   12.50
  -8   3   1   93.49   13.00
  -8   3   1  100.79   13.80
  -8   3   1   98.19   17.30
  -8   3   1  112.99    7.80
  -8   3   1  124.29   17.70
  -8   3   1  107.49    6.70
  -8   3   1  112.39   13.40
  -8   3   1  117.89   18.20
  -8   3   1   99.59    7.10
  -8   3   1  128.69   15.10
  -8   3   1  119.59   16.80
  -8   3   1  122.69   15.00
  -8   3   1  103.09   10.30
  -8   3   1  113.69   12.90
  -8   3   1   97.09   16.60
  -8   3   1   99.29   15.50
   7  -3  -1   43.50    7.80
   7  -3  -1   51.19   10.00
   7  -3  -1   43.50    8.50
  -7   3   1   47.70    6.80
  -7   3   1   53.79   10.40
  -7   3   1   42.50    8.60
  -7   3   1   58.59   13.60
  -7   3   1   49.40    8.40
  -7   3   1   54.79   12.40
  -7   3   1   42.30    8.40
  -7   3   1   62.59   11.50
  -7   3   1   45.80   11.10
  -7   3   1   51.49   12.10
  -7   3   1   54.99   10.20
  -7   3   1   50.69   13.00
  -7   3   1   55.09    3.70
  -7   3   1   50.09   10.90
  -7   3   1   57.09    4.00
  -7   3   1   50.99    4.00
  -7   3   1   49.30    4.30
   6  -3  -1  109.09   14.70
   6  -3  -1   87.19   10.50
   6  -3  -1  102.29   12.40
   6  -3  -1   91.09    9.80
  -6   3   1   93.39   13.30
  -6   3   1   82.89   13.40
  -6   3   1   80.49   10.10
  -6   3   1  102.29   13.40
  -6   3   1   88.89    6.10
  -6   3   1   88.39   13.60
  -6   3   1   95.49    5.80
  -6   3   1   92.29   12.10
  -6   3   1  106.99   14.10
  -6   3   1  109.39   14.90
  -6   3   1   79.49   10.70
   5  -3  -1  205.68   14.10
   5  -3  -1  187.38   16.70
   5  -3  -1  184.08   16.50
   5  -3  -1  190.18   14.30
   5  -3  -1  209.58   15.10
  -5   3   1  176.58   10.50
  -5   3   1  147.59   13.90
  -5   3   1  170.08   16.40
  -5   3   1  190.88   14.30
  -5   3   1  171.38   15.00
  -5   3   1  170.58   13.80
  -5   3   1  200.88   13.80
  -5   3   1  192.68   16.90
  -5   3   1  184.78   15.50
  -5   3   1  164.58   14.40
  -5   3   1  177.38   10.50
  -5   3   1  167.88   15.30
  -5   3   1  183.88   17.10
  -5   3   1  179.68   16.00
   4  -3  -1   36.90    8.60
   4  -3  -1   43.40    9.10
   4  -3  -1   24.30    5.10
   4  -3  -1   26.70    5.80
   4  -3  -1   26.00    7.80
   4  -3  -1   19.10    7.30
   4  -3  -1   35.70    7.80
  -4   3   1   21.80    5.00
  -4   3   1   15.80    5.20
  -4   3   1   20.90    7.40
  -4   3   1   25.70    7.00
  -4   3   1   17.70    4.90
  -4   3   1   13.60    6.60
  -4   3   1   20.20    6.20
  -4   3   1   18.70    6.80
  -4   3   1   22.10    2.90
  -4   3   1   26.00    6.40
  -4   3   1   16.30    6.40
  -4   3   1   25.10    5.80
  -4   3   1   21.40    3.40
  -4   3   1   25.10    7.20
   3  -3  -1 5853.61  292.27
   3  -3  -1 5592.74  292.47
   3  -3  -1 5532.25  292.47
   3  -3  -1 5973.90  292.67
   3  -3  -1 5250.07  290.37
   3  -3  -1 5362.76  290.47
   3  -3  -1 5974.80  292.37
  -3   3   1 5731.13  290.77
  -3   3   1 5035.60  291.77
  -3   3   1 5158.88  291.57
  -3   3   1 5542.65  290.97
  -3   3   1 4999.90  290.57
  -3   3   1 5155.48  291.47
  -3   3   1 5831.92  288.57
  -3   3   1 6154.98  292.47
  -3   3   1 5594.24  290.57
  -3   3   1 5310.37  291.37
  -3   3   1 5488.65  290.77
  -3   3   1 5549.75  289.67
   2  -3  -1    4.80    2.90
   2  -3  -1    1.10    3.70
   2  -3  -1   -0.20    3.80
   2  -3  -1    1.80    1.10
   2  -3  -1    6.40    4.60
   2  -3  -1    2.30    2.60
   2  -3  -1    2.30    3.00
   2  -3  -1    2.90    4.60
   2  -3  -1    0.00    0.80
   2  -3  -1    1.80    3.90
   2  -3  -1   -2.60    2.90
   2  -3  -1    1.70    4.10
  -2   3   1    3.10    3.50
  -2   3   1    3.50    4.00
  -2   3   1   -1.30    2.00
  -2   3   1    0.70    2.60
  -2   3   1    5.20    3.20
  -2   3   1    3.30    1.70
  -2   3   1    3.10    3.40
  -2   3   1    0.30    2.80
  -2   3   1    0.30    2.50
  -2   3   1    2.50    3.40
  -2   3   1   -1.10    2.30
   1  -3  -1 2582.74  122.39
   1  -3  -1 2184.88  121.59
   1  -3  -1 2219.28  121.79
   1  -3  -1 2127.69  121.89
   1  -3  -1 2672.73  122.29
   1  -3  -1 2443.96  122.49
  -1   3   1 2197.18  121.89
  -1   3   1 2136.89  122.29
  -1   3   1 2268.27  123.09
  -1   3   1 2271.97  121.59
  -1   3   1 2344.27  122.09
  -1   3   1 2347.47  122.39
  -1   3   1 2333.17  121.99
   0  -3  -1 3966.50  199.08
   0  -3  -1 3755.62  198.58
   0  -3  -1 3726.53  199.68
   0   3   1 3732.13  197.68
   0   3   1 3798.72  198.98
   0   3   1 3717.43  198.28
  -1  -3  -1 4256.77  218.28
  -1  -3  -1 4405.06  219.78
  -1  -3  -1 4133.39  218.48
  -1  -3  -1 3885.41  218.08
   1   3   1 4078.09  218.38
   1   3   1 4162.08  217.88
  -2  -3  -1 2668.83  132.89
  -2  -3  -1 2337.77  131.99
  -2  -3  -1 2640.04  132.19
  -2  -3  -1 2402.46  131.59
  -2  -3  -1 2394.56  131.79
  -2  -3  -1 2464.45  132.99
   2   3   1 2310.07  131.89
   2   3   1 2343.37  133.09
   2   3   1 2406.66  129.99
   2   3   1 2642.94  131.79
   2   3   1 2438.36  131.99
   2   3   1 2678.13  131.69
   2   3   1 2579.54  130.79
  -3  -3  -1   81.39   10.30
  -3  -3  -1   91.19    9.80
  -3  -3  -1   69.59    8.20
  -3  -3  -1   79.89    7.90
  -3  -3  -1   71.79    7.90
  -3  -3  -1   90.59   11.30
   3   3   1   82.09    9.90
   3   3   1   81.79    8.00
   3   3   1   91.29    6.40
   3   3   1   67.49    7.20
   3   3   1   91.79    6.00
   3   3   1   87.49    7.90
   3   3   1   89.69    9.90
  -4  -3  -1  243.18   17.00
  -4  -3  -1  299.57   17.90
  -4  -3  -1  274.67   19.10
  -4  -3  -1  266.07   20.70
  -4  -3  -1  256.97   17.40
  -4  -3  -1  280.17   19.50
   4   3   1  248.68   18.40
   4   3   1  277.97   19.60
   4   3   1  250.07   15.30
   4   3   1  277.17   15.60
   4   3   1  233.68   18.60
   4   3   1  268.97   16.60
   4   3   1  256.17   16.40
  -5  -3  -1   85.59   13.30
  -5  -3  -1   78.39   12.90
  -5  -3  -1   66.89    9.30
  -5  -3  -1   85.59   11.70
  -5  -3  -1   75.19    8.60
  -5  -3  -1   77.89    8.10
  -5  -3  -1   68.99    8.50
   5   3   1   60.59    6.70
   5   3   1   53.69    9.50
   5   3   1   58.39    6.30
   5   3   1   85.39   12.30
   5   3   1   76.09    8.50
   5   3   1   79.39   10.70
   5   3   1   76.79   10.30
   5   3   1   69.19    8.50
   5   3   1   62.19    5.30
   5   3   1   61.19    6.20
  -6  -3  -1   34.20    6.70
  -6  -3  -1   20.10    8.50
  -6  -3  -1   37.00    7.40
  -6  -3  -1   25.10    7.60
  -6  -3  -1   37.20   11.10
  -6  -3  -1   33.70   10.30
  -6  -3  -1   37.50    7.00
   6   3   1   22.30    6.30
   6   3   1   28.50    6.50
   6   3   1   35.00    4.30
   6   3   1   37.10    9.10
   6   3   1   38.60    5.50
   6   3   1   34.10    4.20
   6   3   1   46.80    9.80
   6   3   1   40.80    8.50
  -7  -3  -1   59.99   10.20
  -7  -3  -1   74.69    9.90
  -7  -3  -1   76.09   13.10
  -7  -3  -1   43.30   13.50
  -7  -3  -1   56.99   14.60
  -7  -3  -1   72.99   13.50
  -7  -3  -1   63.89    8.70
   7   3   1   46.90    6.90
   7   3   1   47.00    8.50
   7   3   1   59.39    8.70
   7   3   1   66.59   12.30
   7   3   1   49.00   11.30
   7   3   1   61.09    9.90
  -8  -3  -1   19.80    6.20
  -8  -3  -1   -2.30    3.40
  -8  -3  -1   27.10    7.60
  -8  -3  -1    4.10    4.20
  -8  -3  -1   21.20    7.30
  -8  -3  -1    3.50    6.90
  -8  -3  -1   29.10   10.90
  -8  -3  -1   20.30    9.80
  -8  -3  -1    0.40    4.20
   8   3   1    7.20    8.90
   8   3   1    8.60    2.70
   8   3   1    7.00    9.10
   8   3   1   20.30    6.50
   8   3   1   22.00    7.30
  -9  -3  -1   11.30    6.50
  -9  -3  -1   20.80   11.40
  -9  -3  -1   14.00   12.40
  -9  -3  -1   26.80   11.30
  -9  -3  -1   41.50   15.40
  -9  -3  -1   11.50    7.00
  -9  -3  -1   14.90    8.10
  -9  -3  -1   12.70    6.50
  -9  -3  -1   28.50   11.20
  -9  -3  -1   35.00   12.70
  -9  -3  -1   21.90   11.90
   9   3   1   31.40   12.00
   9   3   1    7.70    6.80
   9   3   1    3.40    8.50
   9   3   1   11.30    5.60
 -10  -3  -1   63.09   11.20
 -10  -3  -1   65.89   10.40
 -10  -3  -1   68.79   11.30
 -10  -3  -1   78.99   16.20
 -10  -3  -1   81.79   14.30
 -10  -3  -1   74.69   11.50
  10   3   1   62.89   11.40
  10   3   1   60.89    8.30
  10   3   1   57.99   14.20
  10   3   1   62.69   14.60
 -11  -3  -1   -2.40    6.90
 -11  -3  -1   33.40    9.50
 -11  -3  -1   -4.20    5.70
 -11  -3  -1    5.90    7.90
 -11  -3  -1   30.80    9.80
  11   3   1   16.50   11.20
  11   3   1   -0.80   11.70
  11   3   1   29.40   12.20
 -12  -3  -1   92.79   14.10
 -12  -3  -1  129.39   14.30
 -12  -3  -1  102.59   13.80
  12   3   1   91.39   19.20
  12   3   1   79.49   13.90
  12   3   1  102.69   19.30
 -13   4   1    0.40    3.90
 -13   4   1   13.50    9.20
 -13   4   1    8.30    5.30
 -12   4   1   14.50    9.60
 -12   4   1   20.80    5.40
 -12   4   1   17.70    5.00
 -11   4   1    8.70    5.10
 -11   4   1   -2.10    6.60
 -11   4   1   15.10   10.50
 -11   4   1   -0.30    2.80
 -11   4   1    1.00    3.10
 -11   4   1   -5.20    9.70
 -10   4   1  287.27   26.70
 -10   4   1  276.77   28.40
 -10   4   1  251.47   23.60
 -10   4   1  252.07   16.20
 -10   4   1  262.37   23.60
 -10   4   1  288.07   19.50
 -10   4   1  297.87   25.90
 -10   4   1  296.97   25.40
 -10   4   1  249.08   22.90
 -10   4   1  287.17   30.40
 -10   4   1  264.67   16.10
 -10   4   1  284.37   28.00
   9  -4  -1  605.24   39.60
   9  -4  -1  583.84   39.10
  -9   4   1  645.84   45.80
  -9   4   1  605.84   42.40
  -9   4   1  607.84   34.40
  -9   4   1  665.13   44.80
  -9   4   1  660.33   46.30
  -9   4   1  641.14   41.50
  -9   4   1  621.74   40.50
  -9   4   1  673.43   46.20
  -9   4   1  592.94   37.40
  -9   4   1  627.74   43.30
  -9   4   1  620.14   39.40
  -9   4   1  660.53   41.60
  -9   4   1  667.33   41.10
  -9   4   1  616.54   34.00
  -9   4   1  673.73   43.40
   8  -4  -1    3.20    6.30
   8  -4  -1    0.60    5.60
  -8   4   1    5.40    7.80
  -8   4   1    2.70    8.20
  -8   4   1   -1.90    6.00
  -8   4   1    1.10    8.00
  -8   4   1    5.60    1.60
  -8   4   1   22.50    8.40
  -8   4   1    5.40    6.60
  -8   4   1    5.50    9.90
  -8   4   1    8.10    2.10
  -8   4   1   -3.30    7.80
  -8   4   1   16.40    9.90
  -8   4   1    8.20    8.20
  -8   4   1   -1.60    7.40
  -8   4   1    5.10    5.60
   7  -4  -1   -2.10    4.80
   7  -4  -1   -3.30    4.60
   7  -4  -1    2.30    7.60
  -7   4   1    5.20    8.70
  -7   4   1  -12.60    5.50
  -7   4   1    4.30    7.80
  -7   4   1    0.20    5.90
  -7   4   1    3.80    6.50
  -7   4   1   -0.50    6.70
  -7   4   1    1.90    5.50
  -7   4   1    2.40    4.20
  -7   4   1    2.80    5.40
  -7   4   1   -4.10    7.20
  -7   4   1    3.70    7.40
  -7   4   1   -2.50    6.30
  -7   4   1    2.00    5.10
   6  -4  -1    4.10    7.30
   6  -4  -1    8.60    5.00
   6  -4  -1    6.20    5.30
   6  -4  -1    0.80    7.00
  -6   4   1    2.80    4.90
  -6   4   1    7.50    7.80
  -6   4   1   10.00    5.60
  -6   4   1    7.20    1.70
  -6   4   1    9.60    6.30
  -6   4   1   13.70    5.20
  -6   4   1    8.60    1.50
  -6   4   1    5.70    6.80
  -6   4   1    9.20    7.30
  -6   4   1   -2.40    6.00
  -6   4   1    4.90    6.20
  -6   4   1    7.50    6.90
  -6   4   1   17.40    6.90
  -6   4   1    6.60    6.60
   5  -4  -1  107.69   12.20
   5  -4  -1   90.99    9.60
   5  -4  -1  103.89   13.60
   5  -4  -1  108.99   13.40
   5  -4  -1  113.19   15.00
   5  -4  -1  111.29   14.90
  -5   4   1   77.99    5.80
  -5   4   1   78.59    6.40
  -5   4   1   93.39   12.60
  -5   4   1   75.69   11.00
  -5   4   1   98.79   12.60
  -5   4   1   82.69   10.30
  -5   4   1   81.29    8.90
  -5   4   1   84.99   10.30
  -5   4   1   79.79   11.60
  -5   4   1   87.89   11.50
  -5   4   1   76.89   11.90
  -5   4   1   92.49   10.70
  -5   4   1   85.39   10.30
  -5   4   1   71.49    8.90
   4  -4  -1 4617.54  227.08
   4  -4  -1 4417.06  227.48
   4  -4  -1 4591.94  227.68
   4  -4  -1 4521.35  226.98
   4  -4  -1 4549.84  227.48
   4  -4  -1 4303.27  224.48
  -4   4   1 4281.37  223.08
  -4   4   1 3878.31  224.48
  -4   4   1 4275.37  224.28
  -4   4   1 4503.55  226.48
  -4   4   1 4048.19  225.78
  -4   4   1 4244.58  224.68
  -4   4   1 4311.17  221.88
  -4   4   1 4081.19  224.88
  -4   4   1 3960.40  222.38
  -4   4   1 3909.91  226.18
  -4   4   1 4438.46  226.68
  -4   4   1 3789.42  225.68
  -4   4   1 4107.79  225.68
  -4   4   1 4433.76  224.58
  -4   4   1 3959.50  224.58
   3  -4  -1  199.58   14.90
   3  -4  -1  252.97   14.00
   3  -4  -1  237.08   17.20
   3  -4  -1  241.88   17.00
   3  -4  -1  235.68   17.50
   3  -4  -1  239.88   17.80
   3  -4  -1  247.78   16.70
   3  -4  -1  235.58   15.20
   3  -4  -1  235.58   17.30
   3  -4  -1  264.07   14.20
  -3   4   1  259.97   17.20
  -3   4   1  220.58   16.10
  -3   4   1  224.58   13.70
  -3   4   1  236.48   15.30
  -3   4   1  242.18   13.40
  -3   4   1  231.98   15.30
  -3   4   1  255.87   15.20
  -3   4   1  207.98   16.00
  -3   4   1  270.07   17.10
  -3   4   1  199.18   14.90
  -3   4   1  208.08   13.90
  -3   4   1  223.48   14.90
   2  -4  -1  345.07   18.10
   2  -4  -1  299.47   18.70
   2  -4  -1  351.26   20.80
   2  -4  -1  308.27   19.50
   2  -4  -1  346.37   17.80
   2  -4  -1  296.87   19.00
   2  -4  -1  313.47   20.00
   2  -4  -1  321.57   20.80
   2  -4  -1  345.47   18.80
   2  -4  -1  359.26   18.90
  -2   4   1  303.07   18.00
  -2   4   1  295.27   18.50
  -2   4   1  306.57   19.40
  -2   4   1  276.17   18.60
  -2   4   1  320.17   18.60
  -2   4   1  304.97   18.70
  -2   4   1  332.17   18.70
  -2   4   1  285.07   18.10
   1  -4  -1 1733.73   97.69
   1  -4  -1 1745.03   97.19
   1  -4  -1 1710.13   95.89
   1  -4  -1 2032.40   97.39
   1  -4  -1 1944.21   96.79
   1  -4  -1 1851.21   96.69
  -1   4   1 1784.42   97.19
  -1   4   1 1780.62   98.19
  -1   4   1 1994.80   96.59
  -1   4   1 1717.83   97.09
  -1   4   1 1822.92   96.59
  -1   4   1 1776.42   96.79
  -1  -4  -1  848.62   47.40
  -1  -4  -1  838.02   45.30
  -1  -4  -1  782.92   45.70
  -1  -4  -1  900.11   45.70
  -1  -4  -1  742.23   46.00
  -1  -4  -1  857.01   46.30
  -1  -4  -1  890.41   45.10
   1   4   1  761.22   47.30
   1   4   1  902.51   46.00
   1   4   1  785.62   45.00
   1   4   1  808.32   46.10
   1   4   1  868.01   46.40
  -2  -4  -1 1114.29   62.09
  -2  -4  -1 1099.49   60.29
  -2  -4  -1 1032.70   60.69
  -2  -4  -1 1146.99   60.89
  -2  -4  -1 1097.49   61.09
  -2  -4  -1 1027.80   60.29
   2   4   1 1129.89   60.59
   2   4   1 1068.69   62.19
   2   4   1 1154.08   61.09
   2   4   1 1133.89   60.39
   2   4   1 1160.18   59.29
   2   4   1 1103.69   60.39
  -3  -4  -1 2564.94  148.09
  -3  -4  -1 2790.02  148.89
  -3  -4  -1 2937.31  150.28
  -3  -4  -1 2923.71  150.18
  -3  -4  -1 2589.64  148.39
  -3  -4  -1 2855.61  148.99
   3   4   1 2746.13  150.38
   3   4   1 2739.83  148.79
   3   4   1 2977.70  148.39
   3   4   1 2546.75  148.69
   3   4   1 2827.32  146.89
   3   4   1 2891.51  148.19
   3   4   1 2843.92  146.19
  -4  -4  -1  513.65   33.00
  -4  -4  -1  578.04   33.10
  -4  -4  -1  612.54   34.80
  -4  -4  -1  577.84   35.20
  -4  -4  -1  573.44   35.90
  -4  -4  -1  589.44   35.20
   4   4   1  537.75   33.80
   4   4   1  573.04   35.40
   4   4   1  533.15   34.00
   4   4   1  553.74   30.70
   4   4   1  538.15   30.90
   4   4   1  586.24   33.60
   4   4   1  532.35   32.30
   4   4   1  568.54   32.40
  -5  -4  -1  152.78   17.30
  -5  -4  -1  147.09   12.30
  -5  -4  -1  145.89   14.10
  -5  -4  -1  138.59   13.50
  -5  -4  -1  150.08   12.70
  -5  -4  -1  143.79   15.80
  -5  -4  -1  130.29   11.80
   5   4   1  126.09   10.70
   5   4   1  130.49   13.40
   5   4   1  137.89   14.10
   5   4   1  126.59   10.40
   5   4   1  123.59   13.80
   5   4   1  139.29    8.90
   5   4   1  131.29    9.40
   5   4   1  131.19   13.30
  -6  -4  -1   98.29   11.60
  -6  -4  -1   78.69   11.60
  -6  -4  -1   80.99   14.90
  -6  -4  -1   79.79   12.80
  -6  -4  -1   85.09   10.20
  -6  -4  -1   89.09   15.20
   6   4   1   82.49   12.00
   6   4   1   75.69   12.50
   6   4   1   65.19    7.30
   6   4   1   76.69   12.20
   6   4   1   72.89    5.40
   6   4   1   78.69    7.50
   6   4   1   65.09    9.00
   6   4   1   81.19    9.90
   6   4   1   66.99    7.70
  -7  -4  -1   95.09   13.30
  -7  -4  -1  111.39   15.90
  -7  -4  -1   80.79   15.60
  -7  -4  -1  104.99   18.20
  -7  -4  -1   84.39   10.60
  -7  -4  -1  103.49   12.20
  -7  -4  -1   97.89   11.80
   7   4   1   91.59   11.30
   7   4   1   77.39    8.50
   7   4   1   70.59   10.50
   7   4   1   90.79   14.10
   7   4   1   87.69   12.80
   7   4   1   77.29   13.10
   7   4   1   72.79    6.30
  -8  -4  -1  146.39   17.30
  -8  -4  -1  138.99   14.70
  -8  -4  -1  125.99   13.10
  -8  -4  -1  128.69   14.20
  -8  -4  -1  122.29   15.30
   8   4   1  150.18   14.50
   8   4   1  142.39   17.90
   8   4   1  144.09   13.70
   8   4   1  132.29   17.80
  -9  -4  -1   12.40    9.70
  -9  -4  -1   -4.70    6.10
  -9  -4  -1   18.10    9.40
  -9  -4  -1    0.40    5.30
  -9  -4  -1    0.90   10.90
  -9  -4  -1   -2.10    7.80
  -9  -4  -1    4.40   11.00
  -9  -4  -1   10.60    7.70
   9   4   1    1.80    5.40
   9   4   1    1.70    9.50
   9   4   1   11.40    6.30
   9   4   1    7.10    6.80
 -10  -4  -1   23.30   10.70
 -10  -4  -1   47.40   13.10
 -10  -4  -1   31.70    8.70
 -10  -4  -1   21.80    8.80
 -10  -4  -1   14.00    8.60
  10   4   1   32.80    9.30
  10   4   1   11.40   10.90
  10   4   1   19.80   11.30
 -11  -4  -1   24.80   12.40
 -11  -4  -1    7.30    7.30
 -11  -4  -1    5.70    9.10
 -11  -4  -1   32.50   12.00
 -11  -4  -1    6.90    7.40
  11   4   1    8.60    8.40
  11   4   1    7.50    5.20
  11   4   1   11.40   12.10
  11   4   1   15.90   12.20
 -12  -4  -1   43.70   13.00
 -12  -4  -1   55.99   11.70
  12   4   1   41.70   19.20
  12   4   1   71.09   12.80
  12   4   1   29.30   16.20
 -13   5   1   27.90   10.50
 -13   5   1   24.50    5.20
 -13   5   1   29.90    4.60
 -13   5   1   25.10    6.20
 -12   5   1   27.70    4.60
 -12   5   1    3.10    5.30
 -12   5   1   27.80    4.20
 -12   5   1   47.40   11.10
 -11   5   1   13.70    6.30
 -11   5   1   14.10    9.80
 -11   5   1    9.50    7.80
 -11   5   1   20.80    3.60
 -10   5   1    4.30    7.10
 -10   5   1   -4.00   10.70
 -10   5   1   18.20    9.70
 -10   5   1   10.00    8.80
 -10   5   1   11.00    7.50
 -10   5   1    5.10    5.10
 -10   5   1   22.50   12.60
 -10   5   1    0.40    7.20
 -10   5   1   14.30   10.90
 -10   5   1   11.10    9.70
 -10   5   1   15.40    9.10
 -10   5   1   11.90    6.50
 -10   5   1   -5.90    7.10
  -9   5   1   28.30   13.00
  -9   5   1   35.10    7.50
  -9   5   1   25.50    8.00
  -9   5   1   19.40    8.30
  -9   5   1   27.20    3.30
  -9   5   1   31.20    3.50
  -9   5   1   41.50   13.00
  -9   5   1   17.90   10.20
  -9   5   1   44.90   10.80
  -9   5   1   35.00   11.90
  -9   5   1   30.70   11.30
  -9   5   1   24.80   10.10
  -9   5   1   43.40   12.50
  -9   5   1   17.40    9.40
  -9   5   1   20.50    8.10
   8  -5  -1   28.50    7.70
  -8   5   1   43.60   10.90
  -8   5   1   18.30    8.90
  -8   5   1   27.00    7.80
  -8   5   1   24.40    7.70
  -8   5   1   26.10    9.90
  -8   5   1   28.20   10.30
  -8   5   1   27.80    2.40
  -8   5   1   32.00    6.90
  -8   5   1   32.60    9.30
  -8   5   1   11.00   10.10
  -8   5   1   36.40   12.20
  -8   5   1   21.10   10.50
  -8   5   1   28.40    8.60
  -8   5   1   39.30   11.40
   7  -5  -1    6.60    8.20
   7  -5  -1    4.10    8.30
   7  -5  -1   10.80    6.20
  -7   5   1    1.00    5.60
  -7   5   1    9.20    5.60
  -7   5   1    1.90    7.70
  -7   5   1    3.20    6.90
  -7   5   1   12.40    7.70
  -7   5   1    2.40    5.40
  -7   5   1    7.30    8.60
  -7   5   1   12.20    6.80
  -7   5   1    4.30    8.20
  -7   5   1    9.40    7.70
  -7   5   1   12.20    7.60
  -7   5   1   10.00    8.50
   6  -5  -1  143.39   12.80
   6  -5  -1  139.49   16.10
   6  -5  -1  139.09   16.10
   6  -5  -1  131.99   16.30
   6  -5  -1  156.78   19.10
  -6   5   1  130.09   15.70
  -6   5   1  146.19    9.20
  -6   5   1  147.69   12.70
  -6   5   1  139.39   13.60
  -6   5   1  138.79   13.20
  -6   5   1  154.58   16.40
  -6   5   1  136.89   14.50
  -6   5   1  144.19   15.70
  -6   5   1  124.39   12.90
  -6   5   1  146.79    8.00
  -6   5   1  128.39    8.40
  -6   5   1  124.79   13.40
  -6   5   1  147.49   14.60
  -6   5   1  138.29   12.70
   5  -5  -1  685.43   46.90
   5  -5  -1  629.94   40.40
   5  -5  -1  581.44   39.60
   5  -5  -1  593.74   39.50
   5  -5  -1  575.64   40.10
   5  -5  -1  664.33   37.30
  -5   5   1  628.14   36.80
  -5   5   1  624.24   37.40
  -5   5   1  601.14   39.30
  -5   5   1  671.13   39.90
  -5   5   1  616.24   37.50
  -5   5   1  629.74   38.90
  -5   5   1  681.33   34.10
  -5   5   1  597.14   34.20
  -5   5   1  670.43   39.60
  -5   5   1  735.43   33.90
  -5   5   1  588.14   37.60
  -5   5   1  576.04   38.80
  -5   5   1  664.83   35.40
  -5   5   1  622.64   37.00
  -5   5   1  584.74   38.90
  -5   5   1  576.54   37.40
   4  -5  -1 2183.98  110.79
   4  -5  -1 2281.67  115.59
   4  -5  -1 1906.31  112.49
   4  -5  -1 2138.69  114.39
   4  -5  -1 2130.49  110.69
   4  -5  -1 2163.28  115.89
   4  -5  -1 2138.29  112.79
   4  -5  -1 2171.58  116.29
   4  -5  -1 2032.30  115.39
   4  -5  -1 2117.69  114.89
  -4   5   1 2063.89  112.39
  -4   5   1 2002.00  113.19
  -4   5   1 2158.98  112.19
  -4   5   1 2111.59  112.79
  -4   5   1 1939.61  112.89
  -4   5   1 1860.01  110.89
  -4   5   1 2181.48  110.59
  -4   5   1 2191.08  113.19
  -4   5   1 2197.18  110.99
  -4   5   1 1892.01  112.59
  -4   5   1 1942.31  113.79
  -4   5   1 2333.17  115.69
  -4   5   1 1887.81  113.69
  -4   5   1 2383.46  115.49
   3  -5  -1 1061.89   63.49
   3  -5  -1 1143.09   65.99
   3  -5  -1 1116.39   63.49
   3  -5  -1 1236.88   63.29
   3  -5  -1 1236.98   65.19
   3  -5  -1 1263.87   66.09
   3  -5  -1 1259.77   63.09
   3  -5  -1 1182.98   66.49
   3  -5  -1 1237.78   64.59
   3  -5  -1 1223.78   65.59
  -3   5   1 1020.10   62.99
  -3   5   1 1047.40   62.79
  -3   5   1 1241.18   63.89
  -3   5   1 1208.68   63.39
  -3   5   1 1224.88   63.99
  -3   5   1 1197.78   62.99
  -3   5   1 1123.19   62.29
  -3   5   1 1050.99   63.99
  -3   5   1 1141.09   63.89
   2  -5  -1  122.89    8.10
   2  -5  -1  124.79    9.00
   2  -5  -1  109.89    8.80
   2  -5  -1  117.29    8.60
   2  -5  -1  104.29   11.10
   2  -5  -1  109.99   10.70
   2  -5  -1  110.49    9.30
   2  -5  -1  111.29    8.90
  -2   5   1  121.89    9.30
  -2   5   1  115.59    8.30
  -2   5   1  101.59    7.60
  -2   5   1  103.49   10.30
  -2   5   1  118.79    8.80
  -2   5   1  105.69    8.90
  -2   5   1  108.09    8.50
   1  -5  -1  876.91   42.70
   1  -5  -1  735.53   41.30
   1  -5  -1  815.92   42.60
   1  -5  -1  779.32   44.20
   1  -5  -1  830.12   43.40
   1  -5  -1  732.33   43.00
  -1   5   1  808.72   42.20
  -1   5   1  700.43   44.10
  -1   5   1  785.42   43.20
  -1   5   1  759.62   43.20
  -1   5   1  746.23   42.20
  -1   5   1  732.03   42.60
   0  -5  -1  287.37   16.20
   0  -5  -1  258.97   17.10
   0  -5  -1  280.07   18.30
   0  -5  -1  270.57   17.40
   0  -5  -1  251.47   16.60
   0   5   1  234.98   17.10
   0   5   1  271.37   16.60
   0   5   1  262.37   17.20
   0   5   1  279.97   15.10
   0   5   1  255.47   18.50
   0   5   1  260.17   14.50
   0   5   1  245.98   16.00
  -1  -5  -1  165.68   11.10
  -1  -5  -1  160.18   12.40
  -1  -5  -1  142.99   12.00
  -1  -5  -1  159.38   13.90
  -1  -5  -1  152.68   11.60
  -1  -5  -1  160.08   10.30
   1   5   1  140.89   13.70
   1   5   1  149.29   12.20
   1   5   1  181.38   12.70
   1   5   1  143.69   10.20
   1   5   1  170.88   11.80
  -2  -5  -1  264.07   16.00
  -2  -5  -1  230.88   16.90
  -2  -5  -1  223.68   15.70
  -2  -5  -1  230.08   16.90
  -2  -5  -1  253.17   18.70
  -2  -5  -1  208.48   16.10
  -2  -5  -1  231.78   16.80
   2   5   1  264.27   17.30
   2   5   1  261.27   16.90
   2   5   1  240.38   18.40
   2   5   1  247.68   15.90
   2   5   1  235.78   16.10
  -3  -5  -1  672.43   37.60
  -3  -5  -1  615.34   37.50
  -3  -5  -1  682.73   39.80
  -3  -5  -1  562.44   36.80
  -3  -5  -1  692.23   39.00
  -3  -5  -1  600.64   37.50
   3   5   1  655.53   36.90
   3   5   1  645.34   35.30
   3   5   1  630.84   34.20
   3   5   1  614.64   39.50
   3   5   1  618.94   37.20
   3   5   1  684.53   38.20
   3   5   1  653.13   37.30
  -4  -5  -1   25.80    7.80
  -4  -5  -1   25.40    6.60
  -4  -5  -1   12.40    5.90
  -4  -5  -1   30.20    8.80
  -4  -5  -1   22.80    7.60
  -4  -5  -1   31.50    7.70
   4   5   1   27.60    5.70
   4   5   1   23.20    6.70
   4   5   1   14.90    5.90
   4   5   1   36.90    7.30
   4   5   1   27.70    3.30
   4   5   1   23.50    3.80
   4   5   1   23.70    5.70
  -5  -5  -1    6.90    8.60
  -5  -5  -1   10.40   10.20
  -5  -5  -1   10.50    6.10
  -5  -5  -1   19.20    8.30
  -5  -5  -1    1.60    5.00
   5   5   1   10.20    6.30
   5   5   1   12.40    5.00
   5   5   1    9.00    2.90
   5   5   1   11.00    5.50
   5   5   1   13.00    6.70
   5   5   1    9.50    2.70
   5   5   1    5.20    4.40
  -6  -5  -1  169.88   20.70
  -6  -5  -1  122.79   16.20
  -6  -5  -1  122.49   13.40
  -6  -5  -1  115.09   12.70
  -6  -5  -1  156.08   15.40
  -6  -5  -1  149.39   17.00
  -6  -5  -1  134.19   18.20
   6   5   1  131.09   11.70
   6   5   1  135.69   15.80
   6   5   1  128.59   11.00
   6   5   1  112.69   12.20
   6   5   1  122.29   15.10
   6   5   1  121.79    8.20
   6   5   1  127.09    9.60
  -7  -5  -1   26.00    8.70
  -7  -5  -1   23.40   12.10
  -7  -5  -1   35.40   10.70
  -7  -5  -1   30.60    8.00
  -7  -5  -1   23.80    8.30
  -7  -5  -1   33.50   13.00
  -7  -5  -1   29.50    9.10
   7   5   1    8.50    8.90
   7   5   1   29.00    5.30
   7   5   1   26.70    7.40
   7   5   1   33.80    5.90
   7   5   1   31.40    5.20
   7   5   1   33.50    9.90
  -8  -5  -1  145.09   15.20
  -8  -5  -1  177.88   18.50
  -8  -5  -1  170.38   17.20
  -8  -5  -1  186.58   19.20
  -8  -5  -1  166.98   16.70
   8   5   1  167.78   20.60
   8   5   1  197.48   20.10
   8   5   1  162.28   16.00
   8   5   1  170.68   16.50
   8   5   1  197.48   18.10
  -9  -5  -1   31.10    9.30
  -9  -5  -1   36.80    9.70
  -9  -5  -1   54.09   12.20
  -9  -5  -1   44.90   11.20
  -9  -5  -1   30.10    8.20
   9   5   1   43.00   12.10
   9   5   1   29.00    8.00
   9   5   1   45.40   12.90
   9   5   1   32.90    9.10
 -10  -5  -1   29.30    9.90
 -10  -5  -1   69.39   13.90
 -10  -5  -1   26.20    9.20
 -10  -5  -1   42.40   12.20
 -10  -5  -1   45.60   11.60
 -10  -5  -1   68.79   16.20
  10   5   1   38.40    9.80
  10   5   1   13.70    6.80
  10   5   1   35.40   12.40
  10   5   1   52.19   13.80
 -11  -5  -1  450.55   33.20
 -11  -5  -1  411.46   38.40
 -11  -5  -1  375.26   30.70
 -11  -5  -1  443.86   35.10
 -11  -5  -1  408.46   30.10
  11   5   1  343.97   34.20
  11   5   1  387.86   29.90
  11   5   1  349.37   33.70
 -12  -5  -1    6.50    8.50
 -12  -5  -1    3.60    7.80
  12   5   1   -2.70    7.20
  12   5   1   -6.30   11.80
  12   5   1   16.50   13.60
 -13   6   1   10.80    5.80
 -13   6   1    2.40    8.30
 -13   6   1    3.80    3.20
 -13   6   1   12.90    3.10
 -12   6   1   14.70    3.10
 -12   6   1    6.50    7.50
 -12   6   1   22.90    3.60
 -12   6   1   20.20    6.90
 -11   6   1   -3.30    5.70
 -11   6   1    6.50    2.50
 -11   6   1   -5.20    6.30
 -11   6   1    7.50    2.50
 -10   6   1  265.67   25.30
 -10   6   1  240.58   22.70
 -10   6   1  246.18   21.70
 -10   6   1  208.98   20.10
 -10   6   1  237.68   22.60
 -10   6   1  245.38   19.50
 -10   6   1  283.87   27.00
 -10   6   1  249.68   27.10
 -10   6   1  269.57   24.90
 -10   6   1  251.97   25.30
 -10   6   1  233.98   14.30
 -10   6   1  252.97   14.40
 -10   6   1  272.67   28.90
 -10   6   1  240.58   23.70
  -9   6   1   89.49    6.20
  -9   6   1  101.09   16.30
  -9   6   1   83.49    6.00
  -9   6   1   93.39   11.50
  -9   6   1  117.49   17.70
  -9   6   1   85.09   14.20
  -9   6   1   78.59   13.60
  -9   6   1   96.89   16.70
  -9   6   1   88.39   16.20
  -9   6   1   84.89   11.90
  -9   6   1   97.19   18.00
  -9   6   1   81.29   14.40
  -9   6   1   81.99   16.50
  -9   6   1  125.89   18.40
   8  -6  -1  228.68   25.00
   8  -6  -1  212.48   24.60
  -8   6   1  234.68   21.70
  -8   6   1  295.37   24.90
  -8   6   1  238.68   19.90
  -8   6   1  276.77   23.60
  -8   6   1  267.87   14.60
  -8   6   1  260.27   19.70
  -8   6   1  228.68   20.80
  -8   6   1  255.27   22.00
  -8   6   1  259.77   24.90
  -8   6   1  272.57   14.90
  -8   6   1  260.87   24.50
  -8   6   1  275.87   23.70
  -8   6   1  266.77   21.70
  -8   6   1  282.87   24.00
  -8   6   1  302.17   21.20
   7  -6  -1   29.00    7.90
   7  -6  -1   25.20   10.70
   7  -6  -1   23.90   11.20
   7  -6  -1   42.10   12.70
   7  -6  -1   14.50   10.20
  -7   6   1   39.00   10.90
  -7   6   1   22.10    9.50
  -7   6   1   37.00    7.30
  -7   6   1   25.40    8.10
  -7   6   1   31.70    7.70
  -7   6   1   39.80   10.60
  -7   6   1   22.10    7.80
  -7   6   1   17.80    9.00
  -7   6   1   34.20    9.10
  -7   6   1   26.50    3.40
  -7   6   1   12.00    7.80
  -7   6   1   27.20    3.00
  -7   6   1   27.90    3.10
  -7   6   1   15.00   10.10
  -7   6   1   34.20   10.40
   6  -6  -1  471.15   27.20
   6  -6  -1  382.36   30.70
   6  -6  -1  375.66   29.90
   6  -6  -1  388.86   29.80
   6  -6  -1  342.37   29.90
   6  -6  -1  420.66   31.00
  -6   6   1  433.36   22.70
  -6   6   1  400.16   23.10
  -6   6   1  397.16   23.10
  -6   6   1  430.86   26.80
  -6   6   1  446.66   29.90
  -6   6   1  375.26   26.70
  -6   6   1  430.26   26.40
  -6   6   1  423.96   27.40
  -6   6   1  409.56   24.20
  -6   6   1  507.35   30.50
  -6   6   1  380.36   27.20
  -6   6   1  390.06   29.10
  -6   6   1  418.76   29.50
  -6   6   1  388.76   27.30
  -6   6   1  452.15   32.00
   5  -6  -1  261.57   22.10
   5  -6  -1  290.67   15.00
   5  -6  -1  250.97   21.10
   5  -6  -1  266.27   15.00
   5  -6  -1  239.78   23.30
   5  -6  -1  265.37   22.70
   5  -6  -1  222.18   21.30
   5  -6  -1  261.77   18.70
  -5   6   1  301.47   16.60
  -5   6   1  270.37   18.20
  -5   6   1  313.07   24.00
  -5   6   1  286.77   17.90
  -5   6   1  339.17   22.40
  -5   6   1  267.17   19.60
  -5   6   1  246.38   20.40
  -5   6   1  267.57   19.10
  -5   6   1  284.57   15.80
  -5   6   1  262.87   19.10
  -5   6   1  280.77   20.70
  -5   6   1  238.48   16.20
   4  -6  -1    7.40    6.10
   4  -6  -1    5.70    8.00
   4  -6  -1    5.10    3.70
   4  -6  -1    5.00    6.10
   4  -6  -1    3.00    3.20
   4  -6  -1    6.10    5.70
   4  -6  -1    7.70    5.90
   4  -6  -1    0.10    4.80
   4  -6  -1    6.00    3.20
  -4   6   1    6.70    4.50
  -4   6   1    6.10    6.50
  -4   6   1   -0.20    3.30
  -4   6   1   -1.90    4.70
  -4   6   1    0.50    4.10
  -4   6   1    4.50    3.20
  -4   6   1    2.40    4.10
  -4   6   1    2.60    4.10
  -4   6   1    3.90    2.50
  -4   6   1    7.50    3.70
   3  -6  -1 3286.57  168.88
   3  -6  -1 3264.27  169.38
   3  -6  -1 3316.17  170.18
   3  -6  -1 3217.88  172.08
   3  -6  -1 3081.29  171.28
   3  -6  -1 3403.86  167.28
   3  -6  -1 3239.28  172.78
   3  -6  -1 3322.77  170.98
   3  -6  -1 3234.48  170.98
  -3   6   1 3435.56  169.18
  -3   6   1 3285.07  168.48
  -3   6   1 2935.31  167.98
  -3   6   1 2983.20  168.78
  -3   6   1 3071.09  168.38
  -3   6   1 2911.21  168.28
  -3   6   1 3134.29  169.68
  -3   6   1 3022.60  167.78
   2  -6  -1  162.08   10.90
   2  -6  -1  160.68   13.70
   2  -6  -1  174.58   14.80
   2  -6  -1  142.29   11.40
   2  -6  -1  163.78   10.80
   2  -6  -1  150.08   11.30
   2  -6  -1  148.99   11.50
   2  -6  -1  169.88   11.90
  -2   6   1  152.48   11.00
  -2   6   1  163.68   11.20
  -2   6   1  150.18    9.60
  -2   6   1  155.88   11.10
  -2   6   1  151.28   12.10
  -2   6   1  127.19   12.70
  -2   6   1  141.79   11.40
   1  -6  -1   76.49    8.70
   1  -6  -1   63.39    9.60
   1  -6  -1   57.19    7.60
   1  -6  -1   57.39    5.00
   1  -6  -1   65.29    7.20
   1  -6  -1   69.89    7.10
  -1   6   1   66.49    7.00
  -1   6   1   45.70    7.40
  -1   6   1   65.19    7.90
  -1   6   1   68.89    9.60
  -1   6   1   70.09    7.90
  -1   6   1   61.49    6.00
   0  -6  -1  256.27   16.00
   0  -6  -1  241.38   17.20
   0  -6  -1  254.37   16.70
   0  -6  -1  264.47   18.80
   0  -6  -1  259.17   17.70
   0   6   1  232.68   18.90
   0   6   1  261.87   16.70
   0   6   1  280.57   14.90
   0   6   1  221.28   17.30
   0   6   1  268.67   17.30
   0   6   1  206.18   15.60
  -1  -6  -1 2002.40  105.89
  -1  -6  -1 1775.62  103.29
  -1  -6  -1 2038.60  103.09
  -1  -6  -1 1964.70  104.29
  -1  -6  -1 1757.72  103.99
   1   6   1 2088.69  103.89
   1   6   1 1807.52  105.79
   1   6   1 1964.60  104.49
   1   6   1 1934.21  104.09
   1   6   1 1908.61  101.99
  -2  -6  -1  135.09   12.50
  -2  -6  -1  144.49   14.40
  -2  -6  -1  138.99   11.10
  -2  -6  -1  143.99   12.70
  -2  -6  -1  136.89   12.20
  -2  -6  -1  135.79   12.10
  -2  -6  -1  152.48   11.10
   2   6   1  143.39   11.80
   2   6   1  149.29   12.40
   2   6   1  142.89   12.70
   2   6   1  132.59   14.50
   2   6   1  134.19   10.80
  -3  -6  -1  803.52   47.20
  -3  -6  -1  866.81   48.00
  -3  -6  -1  820.52   47.40
  -3  -6  -1  758.22   46.40
  -3  -6  -1  864.91   46.50
   3   6   1  787.32   49.30
   3   6   1  823.42   46.40
   3   6   1  786.82   44.50
   3   6   1  842.32   48.70
   3   6   1  798.92   43.10
   3   6   1  785.62   47.30
  -4  -6  -1    3.70    7.00
  -4  -6  -1   10.10    5.80
  -4  -6  -1    8.40    6.10
  -4  -6  -1    3.40    5.20
  -4  -6  -1   12.30    7.90
  -4  -6  -1    6.20    6.10
   4   6   1   10.90    3.40
   4   6   1    2.70    5.30
   4   6   1    7.70    5.30
   4   6   1   12.70    5.30
   4   6   1    9.40    7.50
   4   6   1   12.40    2.30
  -5  -6  -1   56.69   12.00
  -5  -6  -1   32.10    9.90
  -5  -6  -1   41.50    8.50
  -5  -6  -1   38.20    8.60
  -5  -6  -1   42.60    8.90
  -5  -6  -1   34.50    9.20
   5   6   1   46.70    4.70
   5   6   1   38.90    5.10
   5   6   1   33.50   10.10
   5   6   1   59.39    8.50
   5   6   1   34.70    7.40
   5   6   1   30.90    8.70
   5   6   1   38.60    8.70
  -6  -6  -1  474.85   37.90
  -6  -6  -1  536.25   33.60
  -6  -6  -1  557.94   36.20
  -6  -6  -1  572.14   34.80
  -6  -6  -1  560.14   35.90
  -6  -6  -1  568.94   35.10
  -6  -6  -1  531.55   37.80
   6   6   1  516.85   32.30
   6   6   1  480.65   35.00
   6   6   1  532.95   34.30
   6   6   1  515.45   32.00
   6   6   1  541.25   29.70
   6   6   1  476.05   29.10
   6   6   1  559.24   35.90
  -7  -6  -1   27.20   10.70
  -7  -6  -1   28.90   12.40
  -7  -6  -1   51.39   10.00
  -7  -6  -1   40.70   11.40
  -7  -6  -1   28.80    8.80
  -7  -6  -1   23.80    8.90
   7   6   1   33.40   10.90
   7   6   1   35.10    4.90
   7   6   1   37.30    6.60
   7   6   1   31.70    8.00
   7   6   1   15.10   10.00
   7   6   1   31.00    6.90
  -8  -6  -1   62.69   11.20
  -8  -6  -1   69.19   16.30
  -8  -6  -1   53.49   13.20
  -8  -6  -1   45.70    9.50
  -8  -6  -1   58.49   11.40
   8   6   1   63.79   11.40
   8   6   1   73.49   13.40
   8   6   1   44.10   12.00
   8   6   1   67.49    6.70
   8   6   1   66.79    7.30
   8   6   1   52.49   12.80
   8   6   1   71.19   10.90
  -9  -6  -1   50.29   11.70
  -9  -6  -1   63.69   13.20
  -9  -6  -1   73.59   12.40
  -9  -6  -1   60.09   11.00
  -9  -6  -1   48.70   12.70
   9   6   1   56.29   14.40
   9   6   1   60.69   14.80
   9   6   1   77.99   12.10
 -10  -6  -1   55.69   24.90
 -10  -6  -1    8.80    9.70
 -10  -6  -1   17.80    9.00
 -10  -6  -1    3.20    7.50
 -10  -6  -1   24.90   10.60
  10   6   1   -2.40    4.10
  10   6   1   31.80   11.90
  10   6   1    9.80    8.30
  10   6   1   14.50   11.70
 -11  -6  -1  141.59   16.80
 -11  -6  -1  108.59   15.50
 -11  -6  -1  147.49   25.50
 -11  -6  -1  117.19   17.60
  11   6   1   83.69   18.60
  11   6   1  120.19   16.20
  11   6   1  120.89   20.90
 -13   7   1    7.60    7.00
 -13   7   1    0.70    8.40
 -12   7   1   -1.20    1.90
 -12   7   1   10.80    2.60
 -12   7   1    2.90    6.70
 -11   7   1   -7.60    5.00
 -11   7   1    1.00    2.30
 -11   7   1    9.30    2.50
 -11   7   1    6.80    7.20
 -10   7   1  111.29   13.60
 -10   7   1  127.29   19.40
 -10   7   1  120.89   20.40
 -10   7   1  155.88   22.20
 -10   7   1  112.89    8.00
 -10   7   1  116.59    8.20
 -10   7   1   94.89   17.90
 -10   7   1  108.39   17.20
 -10   7   1  128.89   15.20
 -10   7   1  113.79   20.00
 -10   7   1  150.38   20.00
 -10   7   1  139.29   19.70
   9  -7  -1   13.30   12.00
  -9   7   1    3.40    2.20
  -9   7   1    6.70    9.10
  -9   7   1   -4.30    7.60
  -9   7   1    4.70   10.70
  -9   7   1    1.80    2.80
  -9   7   1   12.50    5.80
  -9   7   1    7.40    9.30
  -9   7   1    9.50    6.10
  -9   7   1    0.10    7.30
  -9   7   1    6.70   11.20
  -9   7   1   16.90    9.90
  -9   7   1    7.40    8.50
  -9   7   1   12.70    7.30
  -9   7   1   15.90   10.70
   8  -7  -1  165.18   22.90
   8  -7  -1  188.18   21.70
   8  -7  -1  165.18   23.70
  -8   7   1  163.88   16.80
  -8   7   1  162.58   15.40
  -8   7   1  156.18   15.80
  -8   7   1  165.48   17.80
  -8   7   1  175.58   18.30
  -8   7   1  160.28   19.30
  -8   7   1  165.08   16.80
  -8   7   1  136.49   15.00
  -8   7   1  190.78   19.70
  -8   7   1  161.28   17.90
  -8   7   1  168.08   21.30
  -8   7   1  174.68   21.70
  -8   7   1  177.48   19.60
  -8   7   1  163.88   10.90
  -8   7   1  161.48   10.20
   7  -7  -1  412.36   32.70
   7  -7  -1  373.96   32.80
   7  -7  -1  389.76   33.50
   7  -7  -1  458.25   34.60
  -7   7   1  415.06   24.40
  -7   7   1  450.25   29.90
  -7   7   1  453.75   32.50
  -7   7   1  501.25   28.90
  -7   7   1  477.45   32.90
  -7   7   1  448.96   32.10
  -7   7   1  409.36   29.80
  -7   7   1  436.86   31.40
  -7   7   1  440.06   29.70
  -7   7   1  453.35   24.40
  -7   7   1  482.65   25.20
  -7   7   1  407.76   31.90
  -7   7   1  420.56   30.00
  -7   7   1  406.16   25.20
  -7   7   1  437.76   31.90
   6  -7  -1   97.99   16.20
   6  -7  -1  117.59   15.50
   6  -7  -1  111.69   15.80
   6  -7  -1  107.79   17.60
   6  -7  -1  119.29   16.70
  -6   7   1  112.89   11.60
  -6   7   1  119.79   15.00
  -6   7   1  120.99   15.40
  -6   7   1  114.39   12.50
  -6   7   1  103.39    8.70
  -6   7   1  108.99   12.50
  -6   7   1  121.89    9.10
  -6   7   1  116.29   12.30
  -6   7   1  102.39   10.00
  -6   7   1  101.09   12.20
  -6   7   1  111.79    8.10
  -6   7   1  123.09   11.40
  -6   7   1  117.29   14.80
   5  -7  -1  372.96   22.70
   5  -7  -1  334.37   19.80
   5  -7  -1  307.87   25.10
   5  -7  -1  319.27   25.00
   5  -7  -1  349.17   20.00
   5  -7  -1  300.67   27.50
   5  -7  -1  341.97   27.00
   5  -7  -1  353.16   26.70
  -5   7   1  323.57   23.80
  -5   7   1  359.46   23.10
  -5   7   1  367.16   20.20
  -5   7   1  336.77   20.80
  -5   7   1  300.87   20.50
  -5   7   1  371.66   22.10
  -5   7   1  394.76   23.20
  -5   7   1  407.76   26.50
  -5   7   1  329.57   22.50
  -5   7   1  353.36   23.20
  -5   7   1  313.87   21.90
  -5   7   1  321.97   25.20
   4  -7  -1   34.90    6.00
   4  -7  -1   31.40    5.40
   4  -7  -1   28.60    5.20
   4  -7  -1   27.30    9.60
   4  -7  -1   42.00    9.20
   4  -7  -1   27.20    7.30
   4  -7  -1   39.80    8.30
   4  -7  -1   31.90    7.90
   4  -7  -1   23.70    8.70
  -4   7   1   32.00    7.00
  -4   7   1   36.60    6.00
  -4   7   1   21.10    5.50
  -4   7   1   29.40    5.50
  -4   7   1   28.40    6.30
  -4   7   1   36.70    5.10
  -4   7   1   31.60    5.30
  -4   7   1   20.80    5.10
  -4   7   1   37.40    7.30
   3  -7  -1 1180.68   67.89
   3  -7  -1 1301.17   67.79
   3  -7  -1 1285.17   68.79
   3  -7  -1 1331.37   70.19
   3  -7  -1 1269.07   66.49
   3  -7  -1 1222.18   67.49
   3  -7  -1 1149.39   72.69
   3  -7  -1 1220.28   67.49
   3  -7  -1 1244.88   69.89
   3  -7  -1 1304.97   66.19
  -3   7   1 1124.49   66.69
  -3   7   1 1140.19   66.29
  -3   7   1 1226.68   66.99
  -3   7   1 1301.67   69.39
  -3   7   1 1241.68   67.69
  -3   7   1 1201.58   67.49
   2  -7  -1   80.29    7.30
   2  -7  -1   93.29   11.60
   2  -7  -1   89.59   10.60
   2  -7  -1   76.59    7.60
   2  -7  -1   77.59    8.60
   2  -7  -1   70.49   10.40
   2  -7  -1   75.79    9.00
   2  -7  -1   87.69    8.20
  -2   7   1   80.59    8.10
  -2   7   1   90.49    9.50
  -2   7   1   88.59    9.50
  -2   7   1   76.49    8.00
  -2   7   1   76.69    7.80
   1  -7  -1  708.03   43.20
   1  -7  -1  738.43   42.20
   1  -7  -1  843.02   42.80
   1  -7  -1  752.32   40.50
   1  -7  -1  752.12   43.30
   1  -7  -1  793.12   44.90
  -1   7   1  693.73   43.20
  -1   7   1  780.72   41.70
  -1   7   1  713.13   42.00
  -1   7   1  810.42   43.90
  -1   7   1  733.83   42.70
  -1   7   1  747.23   45.20
   0  -7  -1   91.19   10.70
   0  -7  -1   87.49    8.60
   0  -7  -1   85.39    9.60
   0  -7  -1   76.79    9.80
   0  -7  -1  102.99   12.80
   0   7   1   87.69   12.30
   0   7   1   93.19   10.20
   0   7   1   75.59   10.10
   0   7   1   87.39    9.20
   0   7   1   86.69    6.90
  -1  -7  -1  416.56   27.70
  -1  -7  -1  381.26   25.70
  -1  -7  -1  427.16   24.50
  -1  -7  -1  417.56   26.20
  -1  -7  -1  363.26   26.10
   1   7   1  393.26   27.60
   1   7   1  386.96   27.90
   1   7   1  404.76   26.10
   1   7   1  399.36   25.00
  -2  -7  -1 1010.00   59.79
  -2  -7  -1 1063.49   58.39
  -2  -7  -1 1062.09   58.99
  -2  -7  -1  966.70   58.89
  -2  -7  -1 1015.40   61.49
  -2  -7  -1 1100.19   57.89
  -2  -7  -1 1073.39   59.99
   2   7   1 1001.20   61.99
   2   7   1 1077.29   59.19
   2   7   1 1102.09   60.49
   2   7   1 1101.49   59.79
  -3  -7  -1  402.66   25.10
  -3  -7  -1  418.06   26.80
  -3  -7  -1  420.66   26.80
  -3  -7  -1  381.96   26.40
  -3  -7  -1  344.67   25.20
  -3  -7  -1  431.26   25.40
  -3  -7  -1  371.76   27.80
   3   7   1  380.06   25.80
   3   7   1  402.16   23.60
   3   7   1  401.16   26.70
   3   7   1  419.86   25.70
   3   7   1  379.96   28.70
  -4  -7  -1   -6.50    5.80
  -4  -7  -1    4.20    5.70
  -4  -7  -1    5.40    7.10
  -4  -7  -1    2.20    5.50
  -4  -7  -1    7.80    7.50
  -4  -7  -1   -2.30    5.10
   4   7   1    3.90    1.70
   4   7   1   -3.50    5.60
   4   7   1    3.70    4.50
   4   7   1    6.80    5.70
   4   7   1   -8.50    8.10
   4   7   1    1.10    3.20
  -5  -7  -1   46.20    9.40
  -5  -7  -1   33.60    9.50
  -5  -7  -1   31.60    9.50
  -5  -7  -1   42.10   11.30
  -5  -7  -1   32.80   10.00
  -5  -7  -1   34.30    8.50
   5   7   1   25.30    4.80
   5   7   1   35.90    3.80
   5   7   1   36.30    7.90
   5   7   1   21.90    7.60
   5   7   1   45.30    9.40
   5   7   1   26.90   10.50
   5   7   1   22.30    8.40
  -6  -7  -1    6.00    6.70
  -6  -7  -1   10.60    7.80
  -6  -7  -1    4.60    7.40
  -6  -7  -1   -1.10    8.80
  -6  -7  -1   -2.10    9.50
  -6  -7  -1    9.90    7.70
  -6  -7  -1    0.00    6.90
   6   7   1    9.30    7.30
   6   7   1   10.90    6.20
   6   7   1    4.00    2.80
   6   7   1    4.60    7.60
   6   7   1    2.00    2.40
   6   7   1    3.00    3.60
   6   7   1    2.50    5.40
  -7  -7  -1   -0.40    4.70
  -7  -7  -1   10.00    7.90
  -7  -7  -1   -5.10    5.70
  -7  -7  -1    2.90    7.90
  -7  -7  -1    7.00    7.70
  -7  -7  -1   -3.80    5.90
  -7  -7  -1    7.50    8.60
   7   7   1   12.00    6.60
   7   7   1    2.60    6.10
   7   7   1    5.60    8.70
   7   7   1   -1.10    6.60
   7   7   1   -2.40    8.40
   7   7   1    9.70    5.20
  -8  -7  -1    5.60   14.30
  -8  -7  -1    5.10    7.30
  -8  -7  -1   14.90   12.70
  -8  -7  -1    6.40    9.70
  -8  -7  -1    3.60    8.80
  -8  -7  -1    6.30    7.90
  -8  -7  -1   11.80    7.70
   8   7   1    9.50    6.90
   8   7   1   -3.70    5.90
   8   7   1    6.00    9.10
   8   7   1    8.00    9.30
   8   7   1    2.70    7.40
   8   7   1    6.30    4.30
  -9  -7  -1    1.50    8.50
  -9  -7  -1   -1.50    6.90
  -9  -7  -1    4.80    8.90
  -9  -7  -1    3.70    8.80
   9   7   1   -3.90    4.00
   9   7   1    1.30    9.90
   9   7   1   -5.30    9.80
   9   7   1    6.20    7.30
 -10  -7  -1    1.50    7.80
 -10  -7  -1   10.80    8.90
 -10  -7  -1   17.50   11.70
 -10  -7  -1   -2.40    9.30
 -10  -7  -1   17.70   10.40
  10   7   1   -6.40    8.00
  10   7   1   -4.00    4.80
  10   7   1    7.40   11.40
  10   7   1   15.90   12.70
 -11  -7  -1   18.10    9.30
 -11  -7  -1   21.00   10.60
  11   7   1   13.00   16.70
  11   7   1    1.00    6.90
  11   7   1  -20.00    8.10
 -13   8   1   -4.10    6.40
 -13   8   1   13.90    8.80
 -12   8   1    0.70    2.30
 -12   8   1    5.30    6.70
 -11   8   1   -6.80    6.00
 -11   8   1   16.70    3.20
 -11   8   1   23.00    8.30
 -11   8   1   23.00    3.90
 -10   8   1  258.97   26.50
 -10   8   1  252.27   15.40
 -10   8   1  244.78   15.10
 -10   8   1  281.27   28.30
 -10   8   1  270.97   30.50
 -10   8   1  227.28   23.10
 -10   8   1  239.58   20.70
 -10   8   1  257.57   21.20
 -10   8   1  274.57   26.90
 -10   8   1  219.78   24.60
   9  -8  -1   27.40   12.90
   9  -8  -1   32.60   13.40
  -9   8   1   25.50    8.60
  -9   8   1   35.30    8.30
  -9   8   1   24.60   10.90
  -9   8   1   19.80   11.40
  -9   8   1   28.40   10.10
  -9   8   1   28.30    4.80
  -9   8   1   34.10   10.70
  -9   8   1   36.70   11.50
  -9   8   1   26.30   12.30
  -9   8   1   29.30    8.20
  -9   8   1   14.60    7.60
  -9   8   1   31.40    4.10
   8  -8  -1    6.20   10.70
   8  -8  -1   15.10   10.80
   8  -8  -1    3.90   10.90
   8  -8  -1   32.60   12.80
  -8   8   1   21.10    3.40
  -8   8   1   16.90   10.40
  -8   8   1   22.00    6.80
  -8   8   1   16.10    8.50
  -8   8   1   30.40    9.80
  -8   8   1   28.20    5.10
  -8   8   1   16.00    3.60
  -8   8   1   20.30    9.40
  -8   8   1   22.30    8.10
  -8   8   1   18.70    3.90
  -8   8   1   31.00   11.90
  -8   8   1   13.50    8.00
   7  -8  -1   50.49   14.90
   7  -8  -1   50.89   13.20
   7  -8  -1   55.59   12.90
   7  -8  -1   59.49   14.60
   7  -8  -1   66.79   15.20
  -7   8   1   55.89   12.60
  -7   8   1   48.00    9.80
  -7   8   1   54.39   10.10
  -7   8   1   54.19    8.30
  -7   8   1   63.99   11.20
  -7   8   1   46.40    5.80
  -7   8   1   57.99   13.80
  -7   8   1   50.99    6.80
  -7   8   1   46.80    7.30
  -7   8   1   53.89    5.90
  -7   8   1   64.59   11.10
   6  -8  -1   75.09   15.00
   6  -8  -1   78.49   14.20
   6  -8  -1   83.09   15.10
   6  -8  -1   61.49   12.90
   6  -8  -1   58.29   14.00
  -6   8   1   61.19   12.20
  -6   8   1   80.39   11.20
  -6   8   1   81.99   10.50
  -6   8   1   87.79   14.40
  -6   8   1   68.99   10.90
  -6   8   1   60.79    9.80
  -6   8   1   66.49    8.00
  -6   8   1   65.49    7.50
  -6   8   1   68.39   10.50
  -6   8   1   59.89   11.10
  -6   8   1   66.29    9.00
[truncated: 4,167,551 more chars]
