# Supplementary material for: Nucleophilic Substitution at a Coordinatively Saturated Five-Membered NHC∙Haloborane Centre
Source: MDPI journal article supplement (doi:10.3390/inorganics10070097), 2022-07-07
Supplement: s1 [file s1 › Cif_8.cif]

data_mo_gar_109_0ma_a
_audit_creation_date               2022-06-17
_audit_creation_method
;
Olex2 1.5
(compiled 2021.08.20 svn.r13c46975 for OlexSys, GUI svn.r6405)
;
_shelx_SHELXL_version_number       '2016/6'
_audit_contact_author_address      ?
_audit_contact_author_email        ?
_audit_contact_author_name         ''
_audit_contact_author_phone        ?
_publ_contact_author_id_orcid      ?
_publ_section_references
;
Dolomanov, O.V., Bourhis, L.J., Gildea, R.J, Howard, J.A.K. & Puschmann, H.
 (2009), J. Appl. Cryst. 42, 339-341.

Sheldrick, G.M. (2015). Acta Cryst. C71, 3-8.
;
_chemical_name_common              ?
_chemical_name_systematic          ?
_chemical_formula_moiety           'C27 H39 N2, C18 H B F15 O'
_chemical_formula_sum              'C45 H40 B F15 N2 O'
_chemical_formula_weight           920.60
_chemical_melting_point            ?
loop_
  _atom_type_symbol
  _atom_type_description
  _atom_type_scat_dispersion_real
  _atom_type_scat_dispersion_imag
  _atom_type_scat_source
 'C' 'C' 0.0033 0.0016 'International Tables Vol C Tables 4.2.6.8 and 6.1.1.4'
 'H' 'H' 0.0000 0.0000 'International Tables Vol C Tables 4.2.6.8 and 6.1.1.4'
 'B' 'B' 0.0013 0.0007 'International Tables Vol C Tables 4.2.6.8 and 6.1.1.4'
 'F' 'F' 0.0171 0.0103 'International Tables Vol C Tables 4.2.6.8 and 6.1.1.4'
 'N' 'N' 0.0061 0.0033 'International Tables Vol C Tables 4.2.6.8 and 6.1.1.4'
 'O' 'O' 0.0106 0.0060 'International Tables Vol C Tables 4.2.6.8 and 6.1.1.4'

_shelx_space_group_comment
;
The symmetry employed for this shelxl refinement is uniquely defined
by the following loop, which should always be used as a source of
symmetry information in preference to the above space-group names.
They are only intended as comments.
;
_space_group_crystal_system        'monoclinic'
_space_group_IT_number             14
_space_group_name_H-M_alt          'P 1 21/n 1'
_space_group_name_Hall             '-P 2yn'
loop_
  _space_group_symop_operation_xyz
 'x, y, z'
 '-x+1/2, y+1/2, -z+1/2'
 '-x, -y, -z'
 'x-1/2, -y-1/2, z-1/2'

_cell_length_a                     10.0450(7)
_cell_length_b                     22.3914(17)
_cell_length_c                     18.9077(15)
_cell_angle_alpha                  90
_cell_angle_beta                   90.037(3)
_cell_angle_gamma                  90
_cell_volume                       4252.7(6)
_cell_formula_units_Z              4
_cell_measurement_reflns_used      9858
_cell_measurement_temperature      100(2)
_cell_measurement_theta_max        33.17
_cell_measurement_theta_min        2.22
_shelx_estimated_absorpt_T_max     0.990
_shelx_estimated_absorpt_T_min     0.967
_exptl_absorpt_coefficient_mu      0.131
_exptl_absorpt_correction_T_max    0.7465
_exptl_absorpt_correction_T_min    0.6729
_exptl_absorpt_correction_type     multi-scan
_exptl_absorpt_process_details    
 'SADABS-2016/2 (Bruker,2016/2) was used for absorption correction. wR2(int) was 0.1130 before and 0.0663 after correction. The Ratio of minimum to maximum transmission is 0.9014. The \l/2 correction factor is Not present.'
_exptl_absorpt_special_details     ?
_exptl_crystal_colour              colourless
_exptl_crystal_colour_primary      colourless
_exptl_crystal_density_diffrn      1.438
_exptl_crystal_density_meas        ?
_exptl_crystal_density_method      ?
_exptl_crystal_description         block
_exptl_crystal_F_000               1888
_exptl_crystal_size_max            0.26
_exptl_crystal_size_mid            0.12
_exptl_crystal_size_min            0.08
_exptl_transmission_factor_max     ?
_exptl_transmission_factor_min     ?
_diffrn_reflns_av_R_equivalents    0.0606
_diffrn_reflns_av_unetI/netI       0.0200
_diffrn_reflns_Laue_measured_fraction_full  0.994
_diffrn_reflns_Laue_measured_fraction_max  0.996
_diffrn_reflns_limit_h_max         15
_diffrn_reflns_limit_h_min         -15
_diffrn_reflns_limit_k_max         34
_diffrn_reflns_limit_k_min         -34
_diffrn_reflns_limit_l_max         29
_diffrn_reflns_limit_l_min         -29
_diffrn_reflns_number              334120
_diffrn_reflns_point_group_measured_fraction_full  0.994
_diffrn_reflns_point_group_measured_fraction_max  0.996
_diffrn_reflns_theta_full          25.242
_diffrn_reflns_theta_max           33.200
_diffrn_reflns_theta_min           2.114
_diffrn_ambient_temperature        100.0
_diffrn_detector_area_resol_mean   ?
_diffrn_measured_fraction_theta_full  0.994
_diffrn_measured_fraction_theta_max  0.996
_diffrn_measurement_device_type    'Bruker D8 VENTURE Kappa Duo PHOTON II CPAD'
_diffrn_measurement_method         '\f and \w scans'
_diffrn_radiation_type             MoK\a
_diffrn_radiation_wavelength       0.71073
_diffrn_source                     ?
_diffrn_standards_number           0
_reflns_Friedel_coverage           0.000
_reflns_Friedel_fraction_full      .
_reflns_Friedel_fraction_max       .
_reflns_number_gt                  14308
_reflns_number_total               16241
_reflns_special_details
;
 Reflections were merged by SHELXL according to the crystal
 class for the calculation of statistics and refinement.
 
 _reflns_Friedel_fraction is defined as the number of unique
 Friedel pairs measured divided by the number that would be
 possible theoretically, ignoring centric projections and
 systematic absences.
;
_reflns_threshold_expression       'I > 2\s(I)'
_computing_cell_refinement         'SAINT V8.40A (?, 2016)'
_computing_data_collection         ?
_computing_data_reduction          'SAINT V8.40A (?, 2016)'
_computing_molecular_graphics      'Olex2 1.5 (Dolomanov et al., 2009)'
_computing_publication_material    'Olex2 1.5 (Dolomanov et al., 2009)'
_computing_structure_refinement    'ShelXL (Sheldrick, 2015)'
_computing_structure_solution      'SHELXT 2014/5 (Sheldrick, 2014)'
_refine_diff_density_max           0.559
_refine_diff_density_min           -0.536
_refine_diff_density_rms           0.160
_refine_ls_extinction_coef         .
_refine_ls_extinction_method       none
_refine_ls_goodness_of_fit_ref     1.166
_refine_ls_hydrogen_treatment      mixed
_refine_ls_matrix_type             full
_refine_ls_number_parameters       589
_refine_ls_number_reflns           16241
_refine_ls_number_restraints       0
_refine_ls_R_factor_all            0.0573
_refine_ls_R_factor_gt             0.0478
_refine_ls_restrained_S_all        1.166
_refine_ls_shift/su_max            0.001
_refine_ls_shift/su_mean           0.000
_refine_ls_structure_factor_coef   Fsqd
_refine_ls_weighting_details      
 'w=1/[\s^2^(Fo^2^)+(0.0726P)^2^+1.4809P] where P=(Fo^2^+2Fc^2^)/3'
_refine_ls_weighting_scheme        calc
_refine_ls_wR_factor_gt            0.1324
_refine_ls_wR_factor_ref           0.1463
_refine_special_details            ?
_olex2_refinement_description
;
1.a Ternary CH refined with riding coordinates:
 C2(H2), C15(H15), C20(H20), C23(H23)
1.b Secondary CH2 refined with riding coordinates:
 C26(H26A,H26B), C27(H27A,H27B)
1.c Aromatic/amide H refined with riding coordinates:
 C5(H5), C8(H8), C9(H9), C11(H11), C12(H12), C13(H13), C18(H18)
1.d Idealised Me refined as rotating group:
 C1(H1A,H1B,H1C), C10(H10A,H10B,H10C), C16(H16A,H16B,H16C), C17(H17A,H17B,
 H17C), C21(H21A,H21B,H21C), C22(H22A,H22B,H22C), C24(H24A,H24B,H24C), C25(H25A,
 H25B,H25C)
;
_atom_sites_solution_hydrogens     mixed
_atom_sites_solution_primary       ?
_atom_sites_solution_secondary     ?
loop_
  _atom_site_label
  _atom_site_type_symbol
  _atom_site_fract_x
  _atom_site_fract_y
  _atom_site_fract_z
  _atom_site_U_iso_or_equiv
  _atom_site_adp_type
  _atom_site_occupancy
  _atom_site_site_symmetry_order
  _atom_site_calc_flag
  _atom_site_refinement_flags_posn
  _atom_site_refinement_flags_adp
  _atom_site_refinement_flags_occupancy
  _atom_site_disorder_assembly
  _atom_site_disorder_group
 N1 N 0.43942(8) 0.67195(4) 0.35202(4) 0.01232(13) Uani 1 1 d . . . . .
 N2 N 0.46628(8) 0.59639(4) 0.27946(4) 0.01323(14) Uani 1 1 d . . . . .
 F3 F 0.38601(8) 0.43374(4) 0.27377(6) 0.0417(2) Uani 1 1 d . . . . .
 F4 F 0.77435(9) 0.07824(3) 0.51039(4) 0.02811(16) Uani 1 1 d . . . . .
 F5 F 0.57347(7) 0.12246(3) 0.42888(4) 0.02457(14) Uani 1 1 d . . . . .
 F6 F 0.60366(6) 0.22409(3) 0.35829(4) 0.01890(12) Uani 1 1 d . . . . .
 O7 O 0.92896(8) 0.26662(3) 0.28636(4) 0.01747(14) Uani 1 1 d . . . . .
 F8 F 1.00710(8) 0.38604(3) 0.27139(4) 0.02774(16) Uani 1 1 d . . . . .
 F9 F 1.14592(9) 0.47692(4) 0.32297(7) 0.0466(3) Uani 1 1 d . . . . .
 F10 F 1.17357(11) 0.49138(4) 0.46555(8) 0.0579(4) Uani 1 1 d . . . . .
 F11 F 1.04665(14) 0.41406(5) 0.55490(6) 0.0547(3) Uani 1 1 d . . . . .
 F12 F 0.90541(9) 0.32373(4) 0.50499(4) 0.03005(17) Uani 1 1 d . . . . .
 F13 F 0.45289(9) 0.41367(4) 0.41147(6) 0.0384(2) Uani 1 1 d . . . . .
 F14 F 0.54137(10) 0.38801(4) 0.16929(5) 0.0390(2) Uani 1 1 d . . . . .
 F15 F 0.75959(9) 0.32744(4) 0.19905(4) 0.02846(16) Uani 1 1 d . . . . .
 F16 F 0.66583(8) 0.34706(4) 0.44333(4) 0.02505(15) Uani 1 1 d . . . . .
 F17 F 1.05080(7) 0.23508(3) 0.43876(4) 0.02436(14) Uani 1 1 d . . . . .
 F18 F 1.01355(8) 0.13552(4) 0.51379(4) 0.02978(17) Uani 1 1 d . . . . .
 C1 C 0.22333(11) 0.77857(5) 0.22338(6) 0.02150(19) Uani 1 1 d . . . . .
 H1A H 0.211320 0.821510 0.231104 0.032 Uiso 1 1 calc GR . . . .
 H1B H 0.149289 0.763176 0.194950 0.032 Uiso 1 1 calc GR . . . .
 H1C H 0.307356 0.771638 0.198386 0.032 Uiso 1 1 calc GR . . . .
 C2 C 0.22649(10) 0.74630(5) 0.29491(6) 0.01695(17) Uani 1 1 d . . . . .
 H2 H 0.246174 0.703235 0.285594 0.020 Uiso 1 1 calc R . . . .
 C3 C 0.33591(9) 0.77032(4) 0.34276(5) 0.01436(16) Uani 1 1 d . . . . .
 C4 C 0.43489(9) 0.73378(4) 0.37241(5) 0.01243(15) Uani 1 1 d . . . . .
 C5 C 0.48357(9) 0.65402(4) 0.29007(5) 0.01135(14) Uani 1 1 d . . . . .
 H5 H 0.523719 0.679926 0.256486 0.014 Uiso 1 1 calc R . . . .
 C6 C 0.51713(10) 0.56390(4) 0.21969(5) 0.01340(15) Uani 1 1 d . . . . .
 C7 C 0.65244(10) 0.54856(4) 0.21881(5) 0.01514(16) Uani 1 1 d . . . . .
 C8 C 0.69881(11) 0.51730(5) 0.15957(6) 0.01890(18) Uani 1 1 d . . . . .
 H8 H 0.790206 0.506709 0.156483 0.023 Uiso 1 1 calc R . . . .
 C9 C 0.61236(12) 0.50166(5) 0.10536(5) 0.01963(19) Uani 1 1 d . . . . .
 H9 H 0.645250 0.480229 0.065680 0.024 Uiso 1 1 calc R . . . .
 C10 C 0.09101(11) 0.74960(6) 0.33222(7) 0.0259(2) Uani 1 1 d . . . . .
 H10A H 0.092987 0.724743 0.374872 0.039 Uiso 1 1 calc GR . . . .
 H10B H 0.021355 0.735077 0.300243 0.039 Uiso 1 1 calc GR . . . .
 H10C H 0.072205 0.791083 0.345372 0.039 Uiso 1 1 calc GR . . . .
 C11 C 0.34124(11) 0.83105(5) 0.35952(6) 0.01838(18) Uani 1 1 d . . . . .
 H11 H 0.275707 0.857331 0.340969 0.022 Uiso 1 1 calc R . . . .
 C12 C 0.44087(11) 0.85353(5) 0.40288(6) 0.01946(18) Uani 1 1 d . . . . .
 H12 H 0.444641 0.895188 0.412197 0.023 Uiso 1 1 calc R . . . .
 C13 C 0.53509(11) 0.81583(5) 0.43281(6) 0.01829(18) Uani 1 1 d . . . . .
 H13 H 0.601329 0.831849 0.463263 0.022 Uiso 1 1 calc R . . . .
 C14 C 0.53358(10) 0.75458(4) 0.41863(5) 0.01430(16) Uani 1 1 d . . . . .
 C15 C 0.63860(10) 0.71357(5) 0.44994(5) 0.01688(17) Uani 1 1 d . . . . .
 H15 H 0.609092 0.671474 0.441813 0.020 Uiso 1 1 calc R . . . .
 C16 C 0.65385(11) 0.72250(6) 0.52972(6) 0.0217(2) Uani 1 1 d . . . . .
 H16A H 0.687690 0.762776 0.539097 0.032 Uiso 1 1 calc GR . . . .
 H16B H 0.716513 0.692934 0.548510 0.032 Uiso 1 1 calc GR . . . .
 H16C H 0.567112 0.717498 0.552665 0.032 Uiso 1 1 calc GR . . . .
 C17 C 0.77203(12) 0.72207(7) 0.41201(7) 0.0282(2) Uani 1 1 d . . . . .
 H17A H 0.760078 0.715350 0.361182 0.042 Uiso 1 1 calc GR . . . .
 H17B H 0.837027 0.693462 0.430640 0.042 Uiso 1 1 calc GR . . . .
 H17C H 0.804305 0.762825 0.419941 0.042 Uiso 1 1 calc GR . . . .
 C18 C 0.47826(11) 0.51692(5) 0.10830(5) 0.01883(18) Uani 1 1 d . . . . .
 H18 H 0.420824 0.505853 0.070576 0.023 Uiso 1 1 calc R . . . .
 C19 C 0.42706(10) 0.54827(4) 0.16591(5) 0.01529(16) Uani 1 1 d . . . . .
 C20 C 0.28151(11) 0.56639(5) 0.16952(6) 0.01872(18) Uani 1 1 d . . . . .
 H20 H 0.258749 0.572359 0.220514 0.022 Uiso 1 1 calc R . . . .
 C21 C 0.18745(13) 0.51869(6) 0.14034(9) 0.0321(3) Uani 1 1 d . . . . .
 H21A H 0.200418 0.514968 0.089162 0.048 Uiso 1 1 calc GR . . . .
 H21B H 0.095124 0.530220 0.150022 0.048 Uiso 1 1 calc GR . . . .
 H21C H 0.206504 0.480322 0.163123 0.048 Uiso 1 1 calc GR . . . .
 C22 C 0.26023(14) 0.62610(6) 0.13189(8) 0.0300(3) Uani 1 1 d . . . . .
 H22A H 0.320432 0.656105 0.151941 0.045 Uiso 1 1 calc GR . . . .
 H22B H 0.167840 0.639060 0.138305 0.045 Uiso 1 1 calc GR . . . .
 H22C H 0.278795 0.621398 0.081320 0.045 Uiso 1 1 calc GR . . . .
 C23 C 0.74691(10) 0.56367(5) 0.27903(5) 0.01676(17) Uani 1 1 d . . . . .
 H23 H 0.693228 0.582017 0.317892 0.020 Uiso 1 1 calc R . . . .
 C24 C 0.85166(15) 0.60926(7) 0.25615(7) 0.0331(3) Uani 1 1 d . . . . .
 H24A H 0.905849 0.592366 0.217995 0.050 Uiso 1 1 calc GR . . . .
 H24B H 0.908940 0.619063 0.296492 0.050 Uiso 1 1 calc GR . . . .
 H24C H 0.807351 0.645569 0.239311 0.050 Uiso 1 1 calc GR . . . .
 C25 C 0.81198(16) 0.50740(6) 0.30819(8) 0.0352(3) Uani 1 1 d . . . . .
 H25A H 0.866744 0.488899 0.271339 0.053 Uiso 1 1 calc GR . . . .
 H25B H 0.742866 0.479270 0.323283 0.053 Uiso 1 1 calc GR . . . .
 H25C H 0.868203 0.517823 0.348734 0.053 Uiso 1 1 calc GR . . . .
 C26 C 0.41381(11) 0.56802(4) 0.34453(5) 0.01681(17) Uani 1 1 d . . . . .
 H26A H 0.483721 0.544861 0.369238 0.020 Uiso 1 1 calc R . . . .
 H26B H 0.337644 0.541441 0.333854 0.020 Uiso 1 1 calc R . . . .
 C27 C 0.36984(11) 0.62241(4) 0.38843(5) 0.01727(17) Uani 1 1 d . . . . .
 H27A H 0.272040 0.627738 0.386897 0.021 Uiso 1 1 calc R . . . .
 H27B H 0.398900 0.618809 0.438291 0.021 Uiso 1 1 calc R . . . .
 C28 C 0.49573(11) 0.40200(5) 0.28967(8) 0.0267(2) Uani 1 1 d . . . . .
 C29 C 0.52879(11) 0.39116(5) 0.35921(7) 0.0234(2) Uani 1 1 d . . . . .
 C30 C 0.64009(10) 0.35681(5) 0.37408(6) 0.01664(17) Uani 1 1 d . . . . .
 C31 C 0.72401(9) 0.33248(4) 0.32346(5) 0.01306(15) Uani 1 1 d . . . . .
 C32 C 0.82760(9) 0.23696(4) 0.39730(5) 0.01365(15) Uani 1 1 d . . . . .
 C33 C 0.92840(10) 0.21017(5) 0.43672(5) 0.01716(17) Uani 1 1 d . . . . .
 C34 C 0.91288(11) 0.15802(5) 0.47528(6) 0.02026(19) Uani 1 1 d . . . . .
 C35 C 0.79204(12) 0.12881(5) 0.47354(6) 0.02019(19) Uani 1 1 d . . . . .
 C36 C 0.70894(10) 0.20512(4) 0.39696(5) 0.01443(16) Uani 1 1 d . . . . .
 C37 C 0.68977(11) 0.15196(5) 0.43325(6) 0.01790(17) Uani 1 1 d . . . . .
 C38 C 0.95286(10) 0.34762(4) 0.38491(6) 0.01645(17) Uani 1 1 d . . . . .
 C39 C 0.96573(12) 0.35883(5) 0.45673(6) 0.0233(2) Uani 1 1 d . . . . .
 C40 C 1.03926(15) 0.40620(6) 0.48439(8) 0.0347(3) Uani 1 1 d . . . . .
 C41 C 1.10285(14) 0.44527(6) 0.43959(10) 0.0380(4) Uani 1 1 d . . . . .
 C42 C 1.09112(12) 0.43727(5) 0.36791(9) 0.0313(3) Uani 1 1 d . . . . .
 C43 C 1.01776(10) 0.38936(5) 0.34247(7) 0.0211(2) Uani 1 1 d . . . . .
 C44 C 0.57435(12) 0.37921(5) 0.23707(7) 0.0242(2) Uani 1 1 d . . . . .
 C45 C 0.68667(11) 0.34614(5) 0.25457(5) 0.01778(17) Uani 1 1 d . . . . .
 B1 B 0.85998(10) 0.29464(5) 0.34631(6) 0.01308(17) Uani 1 1 d . . . . .
 H7 H 0.945(2) 0.2897(10) 0.2531(12) 0.040(5) Uiso 1 1 d . . . . .

loop_
  _atom_site_aniso_label
  _atom_site_aniso_U_11
  _atom_site_aniso_U_22
  _atom_site_aniso_U_33
  _atom_site_aniso_U_23
  _atom_site_aniso_U_13
  _atom_site_aniso_U_12
 N1 0.0144(3) 0.0114(3) 0.0112(3) -0.0010(2) 0.0010(2) 0.0002(2)
 N2 0.0180(3) 0.0106(3) 0.0110(3) -0.0008(2) 0.0012(3) -0.0015(3)
 F3 0.0225(4) 0.0217(4) 0.0809(7) 0.0102(4) -0.0176(4) 0.0056(3)
 F4 0.0410(4) 0.0193(3) 0.0240(3) 0.0094(3) 0.0098(3) 0.0059(3)
 F5 0.0248(3) 0.0217(3) 0.0272(3) 0.0020(3) 0.0044(3) -0.0078(3)
 F6 0.0147(3) 0.0195(3) 0.0225(3) 0.0023(2) -0.0043(2) -0.0011(2)
 O7 0.0205(3) 0.0140(3) 0.0179(3) -0.0020(2) 0.0073(3) 0.0014(2)
 F8 0.0321(4) 0.0191(3) 0.0320(4) -0.0010(3) 0.0153(3) -0.0035(3)
 F9 0.0282(4) 0.0217(4) 0.0897(8) -0.0037(4) 0.0164(5) -0.0108(3)
 F10 0.0444(5) 0.0257(4) 0.1037(10) -0.0232(5) -0.0371(6) -0.0026(4)
 F11 0.0853(8) 0.0343(5) 0.0445(5) -0.0190(4) -0.0446(6) 0.0143(5)
 F12 0.0467(5) 0.0277(4) 0.0157(3) -0.0025(3) -0.0089(3) 0.0071(3)
 F13 0.0259(4) 0.0302(4) 0.0590(6) -0.0052(4) 0.0174(4) 0.0104(3)
 F14 0.0555(5) 0.0266(4) 0.0349(4) 0.0126(3) -0.0292(4) -0.0079(4)
 F15 0.0445(4) 0.0287(4) 0.0122(3) -0.0008(2) 0.0004(3) 0.0016(3)
 F16 0.0281(3) 0.0320(4) 0.0151(3) -0.0028(3) 0.0056(2) 0.0059(3)
 F17 0.0154(3) 0.0231(3) 0.0346(4) 0.0015(3) -0.0082(3) 0.0015(2)
 F18 0.0325(4) 0.0309(4) 0.0259(4) 0.0076(3) -0.0091(3) 0.0118(3)
 C1 0.0190(4) 0.0277(5) 0.0178(4) 0.0031(4) -0.0026(3) 0.0021(4)
 C2 0.0138(4) 0.0188(4) 0.0183(4) 0.0009(3) -0.0019(3) 0.0020(3)
 C3 0.0144(4) 0.0150(4) 0.0137(4) -0.0004(3) 0.0009(3) 0.0028(3)
 C4 0.0142(4) 0.0114(3) 0.0116(3) -0.0017(3) 0.0007(3) 0.0015(3)
 C5 0.0119(3) 0.0117(3) 0.0104(3) -0.0005(3) -0.0007(3) 0.0000(3)
 C6 0.0181(4) 0.0106(3) 0.0114(3) -0.0016(3) 0.0005(3) -0.0004(3)
 C7 0.0187(4) 0.0129(4) 0.0139(4) -0.0013(3) -0.0002(3) -0.0001(3)
 C8 0.0220(4) 0.0174(4) 0.0173(4) -0.0034(3) 0.0023(3) 0.0013(3)
 C9 0.0286(5) 0.0161(4) 0.0142(4) -0.0041(3) 0.0023(3) 0.0008(4)
 C10 0.0160(4) 0.0335(6) 0.0282(5) 0.0074(5) 0.0024(4) 0.0014(4)
 C11 0.0214(4) 0.0150(4) 0.0187(4) -0.0006(3) 0.0012(3) 0.0054(3)
 C12 0.0254(5) 0.0132(4) 0.0198(4) -0.0031(3) 0.0015(4) 0.0025(3)
 C13 0.0222(4) 0.0156(4) 0.0171(4) -0.0042(3) -0.0018(3) 0.0000(3)
 C14 0.0162(4) 0.0143(4) 0.0124(4) -0.0016(3) -0.0007(3) 0.0012(3)
 C15 0.0184(4) 0.0173(4) 0.0149(4) -0.0007(3) -0.0037(3) 0.0016(3)
 C16 0.0198(4) 0.0299(5) 0.0153(4) 0.0014(4) -0.0033(3) -0.0021(4)
 C17 0.0232(5) 0.0382(7) 0.0232(5) 0.0070(5) 0.0048(4) 0.0125(5)
 C18 0.0271(5) 0.0162(4) 0.0132(4) -0.0033(3) -0.0029(3) -0.0010(3)
 C19 0.0204(4) 0.0123(4) 0.0132(4) -0.0008(3) -0.0024(3) -0.0003(3)
 C20 0.0202(4) 0.0175(4) 0.0185(4) -0.0031(3) -0.0047(3) 0.0001(3)
 C21 0.0241(5) 0.0261(6) 0.0462(8) -0.0107(5) -0.0077(5) -0.0032(4)
 C22 0.0287(6) 0.0239(5) 0.0374(7) 0.0054(5) -0.0039(5) 0.0058(4)
 C23 0.0175(4) 0.0162(4) 0.0166(4) -0.0019(3) -0.0017(3) -0.0004(3)
 C24 0.0371(7) 0.0380(7) 0.0244(6) -0.0032(5) 0.0007(5) -0.0203(6)
 C25 0.0451(8) 0.0201(5) 0.0402(7) -0.0021(5) -0.0257(6) 0.0040(5)
 C26 0.0233(4) 0.0130(4) 0.0142(4) 0.0006(3) 0.0033(3) -0.0035(3)
 C27 0.0223(4) 0.0149(4) 0.0146(4) 0.0005(3) 0.0056(3) -0.0023(3)
 C28 0.0164(4) 0.0139(4) 0.0497(7) 0.0049(4) -0.0106(4) 0.0003(3)
 C29 0.0151(4) 0.0168(4) 0.0381(6) -0.0012(4) 0.0044(4) 0.0026(3)
 C30 0.0151(4) 0.0163(4) 0.0185(4) -0.0011(3) 0.0018(3) 0.0019(3)
 C31 0.0136(4) 0.0123(4) 0.0132(4) -0.0007(3) -0.0006(3) -0.0002(3)
 C32 0.0140(4) 0.0142(4) 0.0128(4) -0.0005(3) -0.0004(3) 0.0018(3)
 C33 0.0159(4) 0.0177(4) 0.0179(4) 0.0004(3) -0.0031(3) 0.0024(3)
 C34 0.0240(5) 0.0208(4) 0.0159(4) 0.0024(3) -0.0032(3) 0.0074(4)
 C35 0.0283(5) 0.0167(4) 0.0156(4) 0.0040(3) 0.0047(4) 0.0039(4)
 C36 0.0152(4) 0.0148(4) 0.0133(4) 0.0000(3) -0.0001(3) 0.0012(3)
 C37 0.0201(4) 0.0159(4) 0.0177(4) 0.0008(3) 0.0037(3) -0.0017(3)
 C38 0.0133(4) 0.0142(4) 0.0218(4) -0.0034(3) -0.0031(3) 0.0021(3)
 C39 0.0265(5) 0.0188(4) 0.0245(5) -0.0051(4) -0.0117(4) 0.0052(4)
 C40 0.0398(7) 0.0236(5) 0.0406(7) -0.0134(5) -0.0260(6) 0.0090(5)
 C41 0.0261(6) 0.0186(5) 0.0694(10) -0.0144(6) -0.0227(6) 0.0017(4)
 C42 0.0155(4) 0.0163(5) 0.0622(9) -0.0059(5) 0.0004(5) -0.0024(4)
 C43 0.0144(4) 0.0154(4) 0.0336(6) -0.0038(4) 0.0030(4) 0.0000(3)
 C44 0.0285(5) 0.0158(4) 0.0282(5) 0.0062(4) -0.0153(4) -0.0049(4)
 C45 0.0234(4) 0.0147(4) 0.0153(4) 0.0008(3) -0.0038(3) -0.0023(3)
 B1 0.0129(4) 0.0130(4) 0.0134(4) -0.0017(3) 0.0008(3) 0.0005(3)

_geom_special_details
;
 All esds (except the esd in the dihedral angle between two l.s. planes)
 are estimated using the full covariance matrix.  The cell esds are taken
 into account individually in the estimation of esds in distances, angles
 and torsion angles; correlations between esds in cell parameters are only
 used when they are defined by crystal symmetry.  An approximate (isotropic)
 treatment of cell esds is used for estimating esds involving l.s. planes.
;
loop_
  _geom_bond_atom_site_label_1
  _geom_bond_atom_site_label_2
  _geom_bond_distance
  _geom_bond_site_symmetry_2
  _geom_bond_publ_flag
 N1 C4 1.4379(12) . ?
 N1 C5 1.3156(11) . ?
 N1 C27 1.4810(13) . ?
 N2 C5 1.3174(12) . ?
 N2 C6 1.4382(12) . ?
 N2 C26 1.4817(12) . ?
 F3 C28 1.3453(13) . ?
 F4 C35 1.3414(12) . ?
 F5 C37 1.3446(12) . ?
 F6 C36 1.3537(11) . ?
 O7 B1 1.4696(12) . ?
 O7 H7 0.83(2) . ?
 F8 C43 1.3501(15) . ?
 F9 C42 1.3468(18) . ?
 F10 C41 1.3458(15) . ?
 F11 C40 1.3467(18) . ?
 F12 C39 1.3485(16) . ?
 F13 C29 1.3463(14) . ?
 F14 C44 1.3382(14) . ?
 F15 C45 1.3473(13) . ?
 F16 C30 1.3521(12) . ?
 F17 C33 1.3507(12) . ?
 F18 C34 1.3438(12) . ?
 C1 H1A 0.9800 . ?
 C1 H1B 0.9800 . ?
 C1 H1C 0.9800 . ?
 C1 C2 1.5337(15) . ?
 C2 H2 1.0000 . ?
 C2 C3 1.5213(14) . ?
 C2 C10 1.5350(15) . ?
 C3 C4 1.4042(13) . ?
 C3 C11 1.3972(14) . ?
 C4 C14 1.4008(13) . ?
 C5 H5 0.9500 . ?
 C6 C7 1.4020(14) . ?
 C6 C19 1.4049(13) . ?
 C7 C8 1.4008(14) . ?
 C7 C23 1.5198(14) . ?
 C8 H8 0.9500 . ?
 C8 C9 1.3879(15) . ?
 C9 H9 0.9500 . ?
 C9 C18 1.3909(16) . ?
 C10 H10A 0.9800 . ?
 C10 H10B 0.9800 . ?
 C10 H10C 0.9800 . ?
 C11 H11 0.9500 . ?
 C11 C12 1.3878(16) . ?
 C12 H12 0.9500 . ?
 C12 C13 1.3885(15) . ?
 C13 H13 0.9500 . ?
 C13 C14 1.3975(14) . ?
 C14 C15 1.5184(14) . ?
 C15 H15 1.0000 . ?
 C15 C16 1.5291(15) . ?
 C15 C17 1.5324(16) . ?
 C16 H16A 0.9800 . ?
 C16 H16B 0.9800 . ?
 C16 H16C 0.9800 . ?
 C17 H17A 0.9800 . ?
 C17 H17B 0.9800 . ?
 C17 H17C 0.9800 . ?
 C18 H18 0.9500 . ?
 C18 C19 1.3944(14) . ?
 C19 C20 1.5189(15) . ?
 C20 H20 1.0000 . ?
 C20 C21 1.5288(16) . ?
 C20 C22 1.5295(17) . ?
 C21 H21A 0.9800 . ?
 C21 H21B 0.9800 . ?
 C21 H21C 0.9800 . ?
 C22 H22A 0.9800 . ?
 C22 H22B 0.9800 . ?
 C22 H22C 0.9800 . ?
 C23 H23 1.0000 . ?
 C23 C24 1.5286(16) . ?
 C23 C25 1.5227(17) . ?
 C24 H24A 0.9800 . ?
 C24 H24B 0.9800 . ?
 C24 H24C 0.9800 . ?
 C25 H25A 0.9800 . ?
 C25 H25B 0.9800 . ?
 C25 H25C 0.9800 . ?
 C26 H26A 0.9900 . ?
 C26 H26B 0.9900 . ?
 C26 C27 1.5387(14) . ?
 C27 H27A 0.9900 . ?
 C27 H27B 0.9900 . ?
 C28 C29 1.378(2) . ?
 C28 C44 1.369(2) . ?
 C29 C30 1.3856(15) . ?
 C30 C31 1.3872(13) . ?
 C31 C45 1.3893(14) . ?
 C31 B1 1.6641(14) . ?
 C32 C33 1.3927(13) . ?
 C32 C36 1.3889(13) . ?
 C32 B1 1.6445(14) . ?
 C33 C34 1.3854(15) . ?
 C34 C35 1.3792(17) . ?
 C35 C37 1.3797(16) . ?
 C36 C37 1.3873(14) . ?
 C38 C39 1.3869(15) . ?
 C38 C43 1.3939(15) . ?
 C38 B1 1.6762(14) . ?
 C39 C40 1.3941(17) . ?
 C40 C41 1.375(3) . ?
 C41 C42 1.372(2) . ?
 C42 C43 1.3874(16) . ?
 C44 C45 1.3892(16) . ?

loop_
  _geom_angle_atom_site_label_1
  _geom_angle_atom_site_label_2
  _geom_angle_atom_site_label_3
  _geom_angle
  _geom_angle_site_symmetry_1
  _geom_angle_site_symmetry_3
  _geom_angle_publ_flag
 C4 N1 C27 125.56(8) . . ?
 C5 N1 C4 122.91(8) . . ?
 C5 N1 C27 110.17(8) . . ?
 C5 N2 C6 124.63(8) . . ?
 C5 N2 C26 109.91(8) . . ?
 C6 N2 C26 124.21(8) . . ?
 B1 O7 H7 114.3(15) . . ?
 H1A C1 H1B 109.5 . . ?
 H1A C1 H1C 109.5 . . ?
 H1B C1 H1C 109.5 . . ?
 C2 C1 H1A 109.5 . . ?
 C2 C1 H1B 109.5 . . ?
 C2 C1 H1C 109.5 . . ?
 C1 C2 H2 107.6 . . ?
 C1 C2 C10 111.39(9) . . ?
 C3 C2 C1 111.86(9) . . ?
 C3 C2 H2 107.6 . . ?
 C3 C2 C10 110.50(9) . . ?
 C10 C2 H2 107.6 . . ?
 C4 C3 C2 122.86(9) . . ?
 C11 C3 C2 120.44(9) . . ?
 C11 C3 C4 116.71(9) . . ?
 C3 C4 N1 118.46(8) . . ?
 C14 C4 N1 117.70(8) . . ?
 C14 C4 C3 123.78(9) . . ?
 N1 C5 N2 112.94(8) . . ?
 N1 C5 H5 123.5 . . ?
 N2 C5 H5 123.5 . . ?
 C7 C6 N2 118.56(8) . . ?
 C7 C6 C19 123.66(9) . . ?
 C19 C6 N2 117.77(9) . . ?
 C6 C7 C23 122.78(9) . . ?
 C8 C7 C6 117.05(9) . . ?
 C8 C7 C23 120.16(9) . . ?
 C7 C8 H8 119.7 . . ?
 C9 C8 C7 120.56(10) . . ?
 C9 C8 H8 119.7 . . ?
 C8 C9 H9 119.5 . . ?
 C8 C9 C18 120.93(9) . . ?
 C18 C9 H9 119.5 . . ?
 C2 C10 H10A 109.5 . . ?
 C2 C10 H10B 109.5 . . ?
 C2 C10 H10C 109.5 . . ?
 H10A C10 H10B 109.5 . . ?
 H10A C10 H10C 109.5 . . ?
 H10B C10 H10C 109.5 . . ?
 C3 C11 H11 119.5 . . ?
 C12 C11 C3 120.97(9) . . ?
 C12 C11 H11 119.5 . . ?
 C11 C12 H12 119.6 . . ?
 C11 C12 C13 120.75(9) . . ?
 C13 C12 H12 119.6 . . ?
 C12 C13 H13 119.6 . . ?
 C12 C13 C14 120.74(10) . . ?
 C14 C13 H13 119.6 . . ?
 C4 C14 C15 122.24(8) . . ?
 C13 C14 C4 116.97(9) . . ?
 C13 C14 C15 120.74(9) . . ?
 C14 C15 H15 107.7 . . ?
 C14 C15 C16 112.01(9) . . ?
 C14 C15 C17 110.49(9) . . ?
 C16 C15 H15 107.7 . . ?
 C16 C15 C17 111.00(9) . . ?
 C17 C15 H15 107.7 . . ?
 C15 C16 H16A 109.5 . . ?
 C15 C16 H16B 109.5 . . ?
 C15 C16 H16C 109.5 . . ?
 H16A C16 H16B 109.5 . . ?
 H16A C16 H16C 109.5 . . ?
 H16B C16 H16C 109.5 . . ?
 C15 C17 H17A 109.5 . . ?
 C15 C17 H17B 109.5 . . ?
 C15 C17 H17C 109.5 . . ?
 H17A C17 H17B 109.5 . . ?
 H17A C17 H17C 109.5 . . ?
 H17B C17 H17C 109.5 . . ?
 C9 C18 H18 119.6 . . ?
 C9 C18 C19 120.84(9) . . ?
 C19 C18 H18 119.6 . . ?
 C6 C19 C20 121.35(9) . . ?
 C18 C19 C6 116.94(9) . . ?
 C18 C19 C20 121.68(9) . . ?
 C19 C20 H20 107.4 . . ?
 C19 C20 C21 113.07(9) . . ?
 C19 C20 C22 110.30(9) . . ?
 C21 C20 H20 107.4 . . ?
 C21 C20 C22 110.89(10) . . ?
 C22 C20 H20 107.4 . . ?
 C20 C21 H21A 109.5 . . ?
 C20 C21 H21B 109.5 . . ?
 C20 C21 H21C 109.5 . . ?
 H21A C21 H21B 109.5 . . ?
 H21A C21 H21C 109.5 . . ?
 H21B C21 H21C 109.5 . . ?
 C20 C22 H22A 109.5 . . ?
 C20 C22 H22B 109.5 . . ?
 C20 C22 H22C 109.5 . . ?
 H22A C22 H22B 109.5 . . ?
 H22A C22 H22C 109.5 . . ?
 H22B C22 H22C 109.5 . . ?
 C7 C23 H23 107.8 . . ?
 C7 C23 C24 111.49(9) . . ?
 C7 C23 C25 110.78(9) . . ?
 C24 C23 H23 107.8 . . ?
 C25 C23 H23 107.8 . . ?
 C25 C23 C24 111.08(11) . . ?
 C23 C24 H24A 109.5 . . ?
 C23 C24 H24B 109.5 . . ?
 C23 C24 H24C 109.5 . . ?
 H24A C24 H24B 109.5 . . ?
 H24A C24 H24C 109.5 . . ?
 H24B C24 H24C 109.5 . . ?
 C23 C25 H25A 109.5 . . ?
 C23 C25 H25B 109.5 . . ?
 C23 C25 H25C 109.5 . . ?
 H25A C25 H25B 109.5 . . ?
 H25A C25 H25C 109.5 . . ?
 H25B C25 H25C 109.5 . . ?
 N2 C26 H26A 111.3 . . ?
 N2 C26 H26B 111.3 . . ?
 N2 C26 C27 102.18(8) . . ?
 H26A C26 H26B 109.2 . . ?
 C27 C26 H26A 111.3 . . ?
 C27 C26 H26B 111.3 . . ?
 N1 C27 C26 101.90(7) . . ?
 N1 C27 H27A 111.4 . . ?
 N1 C27 H27B 111.4 . . ?
 C26 C27 H27A 111.4 . . ?
 C26 C27 H27B 111.4 . . ?
 H27A C27 H27B 109.3 . . ?
 F3 C28 C29 120.23(13) . . ?
 F3 C28 C44 120.50(13) . . ?
 C44 C28 C29 119.26(10) . . ?
 F13 C29 C28 119.88(11) . . ?
 F13 C29 C30 121.08(12) . . ?
 C28 C29 C30 119.05(11) . . ?
 F16 C30 C29 116.10(9) . . ?
 F16 C30 C31 119.26(9) . . ?
 C29 C30 C31 124.65(10) . . ?
 C30 C31 C45 113.37(9) . . ?
 C30 C31 B1 121.32(8) . . ?
 C45 C31 B1 125.21(8) . . ?
 C33 C32 B1 120.53(8) . . ?
 C36 C32 C33 113.89(9) . . ?
 C36 C32 B1 124.79(8) . . ?
 F17 C33 C32 119.93(9) . . ?
 F17 C33 C34 115.84(9) . . ?
 C34 C33 C32 124.23(10) . . ?
 F18 C34 C33 121.08(10) . . ?
 F18 C34 C35 119.80(10) . . ?
 C35 C34 C33 119.12(10) . . ?
 F4 C35 C34 120.33(10) . . ?
 F4 C35 C37 120.34(10) . . ?
 C34 C35 C37 119.33(10) . . ?
 F6 C36 C32 120.77(8) . . ?
 F6 C36 C37 115.32(9) . . ?
 C37 C36 C32 123.88(9) . . ?
 F5 C37 C35 119.73(9) . . ?
 F5 C37 C36 120.80(10) . . ?
 C35 C37 C36 119.47(10) . . ?
 C39 C38 C43 113.51(10) . . ?
 C39 C38 B1 127.30(10) . . ?
 C43 C38 B1 118.96(9) . . ?
 F12 C39 C38 121.03(10) . . ?
 F12 C39 C40 115.33(12) . . ?
 C38 C39 C40 123.65(13) . . ?
 F11 C40 C39 119.98(15) . . ?
 F11 C40 C41 120.08(13) . . ?
 C41 C40 C39 119.94(13) . . ?
 F10 C41 C40 120.58(16) . . ?
 F10 C41 C42 120.35(16) . . ?
 C42 C41 C40 119.06(11) . . ?
 F9 C42 C41 120.16(12) . . ?
 F9 C42 C43 120.54(14) . . ?
 C41 C42 C43 119.25(13) . . ?
 F8 C43 C38 119.95(9) . . ?
 F8 C43 C42 115.43(11) . . ?
 C42 C43 C38 124.57(12) . . ?
 F14 C44 C28 119.88(11) . . ?
 F14 C44 C45 120.47(12) . . ?
 C28 C44 C45 119.64(11) . . ?
 F15 C45 C31 121.03(9) . . ?
 F15 C45 C44 114.96(10) . . ?
 C31 C45 C44 124.01(10) . . ?
 O7 B1 C31 113.86(8) . . ?
 O7 B1 C32 102.15(7) . . ?
 O7 B1 C38 112.05(8) . . ?
 C31 B1 C38 102.08(7) . . ?
 C32 B1 C31 112.92(7) . . ?
 C32 B1 C38 114.26(8) . . ?

loop_
  _geom_torsion_atom_site_label_1
  _geom_torsion_atom_site_label_2
  _geom_torsion_atom_site_label_3
  _geom_torsion_atom_site_label_4
  _geom_torsion
  _geom_torsion_site_symmetry_1
  _geom_torsion_site_symmetry_2
  _geom_torsion_site_symmetry_3
  _geom_torsion_site_symmetry_4
  _geom_torsion_publ_flag
 N1 C4 C14 C13 174.30(9) . . . . ?
 N1 C4 C14 C15 -3.14(13) . . . . ?
 N2 C6 C7 C8 -179.56(9) . . . . ?
 N2 C6 C7 C23 1.33(14) . . . . ?
 N2 C6 C19 C18 179.83(9) . . . . ?
 N2 C6 C19 C20 1.62(14) . . . . ?
 N2 C26 C27 N1 -16.14(10) . . . . ?
 F3 C28 C29 F13 -1.67(17) . . . . ?
 F3 C28 C29 C30 178.06(10) . . . . ?
 F3 C28 C44 F14 -0.65(17) . . . . ?
 F3 C28 C44 C45 -179.49(10) . . . . ?
 F4 C35 C37 F5 -2.47(16) . . . . ?
 F4 C35 C37 C36 178.36(9) . . . . ?
 F6 C36 C37 F5 0.20(14) . . . . ?
 F6 C36 C37 C35 179.36(9) . . . . ?
 F9 C42 C43 F8 0.24(16) . . . . ?
 F9 C42 C43 C38 -177.17(10) . . . . ?
 F10 C41 C42 F9 -2.66(19) . . . . ?
 F10 C41 C42 C43 179.95(11) . . . . ?
 F11 C40 C41 F10 0.4(2) . . . . ?
 F11 C40 C41 C42 -178.34(12) . . . . ?
 F12 C39 C40 F11 0.30(18) . . . . ?
 F12 C39 C40 C41 -178.90(11) . . . . ?
 F13 C29 C30 F16 0.73(16) . . . . ?
 F13 C29 C30 C31 -179.38(10) . . . . ?
 F14 C44 C45 F15 3.27(15) . . . . ?
 F14 C44 C45 C31 -176.67(10) . . . . ?
 F16 C30 C31 C45 -179.69(9) . . . . ?
 F16 C30 C31 B1 -3.28(14) . . . . ?
 F17 C33 C34 F18 2.09(15) . . . . ?
 F17 C33 C34 C35 -177.57(10) . . . . ?
 F18 C34 C35 F4 0.34(16) . . . . ?
 F18 C34 C35 C37 -179.33(10) . . . . ?
 C1 C2 C3 C4 -124.26(10) . . . . ?
 C1 C2 C3 C11 56.11(12) . . . . ?
 C2 C3 C4 N1 5.27(13) . . . . ?
 C2 C3 C4 C14 -177.56(9) . . . . ?
 C2 C3 C11 C12 -179.75(10) . . . . ?
 C3 C4 C14 C13 -2.89(14) . . . . ?
 C3 C4 C14 C15 179.68(9) . . . . ?
 C3 C11 C12 C13 -2.35(16) . . . . ?
 C4 N1 C5 N2 -173.37(8) . . . . ?
 C4 N1 C27 C26 -178.80(9) . . . . ?
 C4 C3 C11 C12 0.60(15) . . . . ?
 C4 C14 C15 C16 -132.46(10) . . . . ?
 C4 C14 C15 C17 103.23(12) . . . . ?
 C5 N1 C4 C3 74.47(12) . . . . ?
 C5 N1 C4 C14 -102.87(11) . . . . ?
 C5 N1 C27 C26 14.29(11) . . . . ?
 C5 N2 C6 C7 77.40(12) . . . . ?
 C5 N2 C6 C19 -103.84(11) . . . . ?
 C5 N2 C26 C27 14.11(11) . . . . ?
 C6 N2 C5 N1 -173.37(9) . . . . ?
 C6 N2 C26 C27 -178.16(9) . . . . ?
 C6 C7 C8 C9 -1.17(15) . . . . ?
 C6 C7 C23 C24 -113.27(12) . . . . ?
 C6 C7 C23 C25 122.49(12) . . . . ?
 C6 C19 C20 C21 -143.18(11) . . . . ?
 C6 C19 C20 C22 92.01(12) . . . . ?
 C7 C6 C19 C18 -1.48(15) . . . . ?
 C7 C6 C19 C20 -179.69(9) . . . . ?
 C7 C8 C9 C18 0.41(17) . . . . ?
 C8 C7 C23 C24 67.66(13) . . . . ?
 C8 C7 C23 C25 -56.59(14) . . . . ?
 C8 C9 C18 C19 -0.12(16) . . . . ?
 C9 C18 C19 C6 0.62(15) . . . . ?
 C9 C18 C19 C20 178.83(10) . . . . ?
 C10 C2 C3 C4 111.02(11) . . . . ?
 C10 C2 C3 C11 -68.60(12) . . . . ?
 C11 C3 C4 N1 -175.09(8) . . . . ?
 C11 C3 C4 C14 2.08(14) . . . . ?
 C11 C12 C13 C14 1.49(16) . . . . ?
 C12 C13 C14 C4 1.04(15) . . . . ?
 C12 C13 C14 C15 178.52(10) . . . . ?
 C13 C14 C15 C16 50.20(13) . . . . ?
 C13 C14 C15 C17 -74.11(13) . . . . ?
 C18 C19 C20 C21 38.69(15) . . . . ?
 C18 C19 C20 C22 -86.11(12) . . . . ?
 C19 C6 C7 C8 1.76(15) . . . . ?
 C19 C6 C7 C23 -177.35(9) . . . . ?
 C23 C7 C8 C9 177.96(10) . . . . ?
 C26 N2 C5 N1 -5.71(11) . . . . ?
 C26 N2 C6 C7 -88.54(12) . . . . ?
 C26 N2 C6 C19 90.22(12) . . . . ?
 C27 N1 C4 C3 -90.86(12) . . . . ?
 C27 N1 C4 C14 91.80(12) . . . . ?
 C27 N1 C5 N2 -6.05(11) . . . . ?
 C28 C29 C30 F16 -178.99(10) . . . . ?
 C28 C29 C30 C31 0.90(17) . . . . ?
 C28 C44 C45 F15 -177.89(10) . . . . ?
 C28 C44 C45 C31 2.17(17) . . . . ?
 C29 C28 C44 F14 178.16(10) . . . . ?
 C29 C28 C44 C45 -0.68(17) . . . . ?
 C29 C30 C31 C45 0.42(15) . . . . ?
 C29 C30 C31 B1 176.83(10) . . . . ?
 C30 C31 C45 F15 178.10(9) . . . . ?
 C30 C31 C45 C44 -1.96(15) . . . . ?
 C30 C31 B1 O7 173.72(9) . . . . ?
 C30 C31 B1 C32 57.81(12) . . . . ?
 C30 C31 B1 C38 -65.33(11) . . . . ?
 C32 C33 C34 F18 -178.10(10) . . . . ?
 C32 C33 C34 C35 2.25(17) . . . . ?
 C32 C36 C37 F5 -177.94(9) . . . . ?
 C32 C36 C37 C35 1.22(16) . . . . ?
 C33 C32 C36 F6 -176.93(9) . . . . ?
 C33 C32 C36 C37 1.11(14) . . . . ?
 C33 C32 B1 O7 74.78(11) . . . . ?
 C33 C32 B1 C31 -162.52(9) . . . . ?
 C33 C32 B1 C38 -46.44(12) . . . . ?
 C33 C34 C35 F4 180.00(10) . . . . ?
 C33 C34 C35 C37 0.32(16) . . . . ?
 C34 C35 C37 F5 177.21(10) . . . . ?
 C34 C35 C37 C36 -1.96(16) . . . . ?
 C36 C32 C33 F17 176.93(9) . . . . ?
 C36 C32 C33 C34 -2.88(15) . . . . ?
 C36 C32 B1 O7 -94.45(10) . . . . ?
 C36 C32 B1 C31 28.25(13) . . . . ?
 C36 C32 B1 C38 144.34(9) . . . . ?
 C38 C39 C40 F11 179.90(11) . . . . ?
 C38 C39 C40 C41 0.69(19) . . . . ?
 C39 C38 C43 F8 -176.08(9) . . . . ?
 C39 C38 C43 C42 1.22(16) . . . . ?
 C39 C38 B1 O7 -139.58(10) . . . . ?
 C39 C38 B1 C31 98.22(11) . . . . ?
 C39 C38 B1 C32 -24.01(14) . . . . ?
 C39 C40 C41 F10 179.63(12) . . . . ?
 C39 C40 C41 C42 0.9(2) . . . . ?
 C40 C41 C42 F9 176.10(12) . . . . ?
 C40 C41 C42 C43 -1.29(19) . . . . ?
 C41 C42 C43 F8 177.62(11) . . . . ?
 C41 C42 C43 C38 0.21(18) . . . . ?
 C43 C38 C39 F12 177.92(10) . . . . ?
 C43 C38 C39 C40 -1.66(16) . . . . ?
 C43 C38 B1 O7 46.27(12) . . . . ?
 C43 C38 B1 C31 -75.93(10) . . . . ?
 C43 C38 B1 C32 161.84(9) . . . . ?
 C44 C28 C29 F13 179.52(10) . . . . ?
 C44 C28 C29 C30 -0.76(17) . . . . ?
 C45 C31 B1 O7 -10.32(13) . . . . ?
 C45 C31 B1 C32 -126.22(10) . . . . ?
 C45 C31 B1 C38 110.64(10) . . . . ?
 B1 C31 C45 F15 1.86(15) . . . . ?
 B1 C31 C45 C44 -178.21(9) . . . . ?
 B1 C32 C33 F17 6.60(14) . . . . ?
 B1 C32 C33 C34 -173.21(10) . . . . ?
 B1 C32 C36 F6 -7.07(14) . . . . ?
 B1 C32 C36 C37 170.97(9) . . . . ?
 B1 C38 C39 F12 3.50(16) . . . . ?
 B1 C38 C39 C40 -176.08(11) . . . . ?
 B1 C38 C43 F8 -1.15(14) . . . . ?
 B1 C38 C43 C42 176.15(10) . . . . ?

loop_
  _refln_index_h
  _refln_index_k
  _refln_index_l
  _refln_F_squared_meas
  _refln_F_squared_sigma
 1 0 0 -0.3 0.6
 1 0 0 -0.1 0.5
 1 0 0 -0.7 0.3
 1 0 0 0 0.8
 -1 0 0 0.9 1
 -1 0 0 -0.2 0.7
 -1 0 0 0.9 0.6
 -1 0 0 0.1 0.8
 -1 0 0 1.9 0.8
 -1 0 0 -0.5 0.7
 -1 0 0 0.7 0.9
 -1 0 0 -0.2 0.5
 -1 0 0 0.8 0.8
 -1 0 0 0 0.7
 -1 0 0 1.9 0.7
 -1 0 0 -0.3 0.8
 3 0 0 1.5 0.7
 3 0 0 -0.1 2.5
 3 0 0 3.4 2
 3 0 0 -1.6 3
 3 0 0 1.8 1.9
 3 0 0 -0.7 2.3
 3 0 0 0.7 2
 3 0 0 0.4 1.6
 3 0 0 0.8 2.2
 3 0 0 1.2 2
 3 0 0 2.2 2.5
 3 0 0 1.8 1.8
 3 0 0 -1.8 2.7
 3 0 0 2.3 1.9
 -3 0 0 0.2 2.2
 -3 0 0 0.6 2.9
 -3 0 0 0.5 2.4
 -3 0 0 -0.2 2.2
 -3 0 0 1.9 2.6
 -3 0 0 0 2.7
 -3 0 0 0.5 2.1
 -3 0 0 1.8 2.3
 -3 0 0 1.5 2.5
 -3 0 0 -0.5 1.7
 -3 0 0 -2.4 2.6
 4 0 0 1558.94 86.69
 4 0 0 1636.74 87.19
 4 0 0 1630.44 86.29
 4 0 0 1464.35 86.89
 4 0 0 1711.93 87.59
 4 0 0 1597.64 84.89
 4 0 0 1699.03 84.99
 4 0 0 1560.74 86.39
 4 0 0 1570.74 87.59
 4 0 0 1680.83 86.89
 4 0 0 1590.74 87.19
 4 0 0 1630.14 87.79
 4 0 0 1665.93 86.79
 4 0 0 1875.71 88.59
 4 0 0 1746.23 86.89
 -4 0 0 1683.43 87.49
 -4 0 0 1748.93 87.09
 -4 0 0 1617.84 87.89
 -4 0 0 1664.03 86.99
 -4 0 0 1603.74 87.69
 -4 0 0 1568.64 86.79
 -4 0 0 1697.43 86.59
 -4 0 0 1494.25 87.09
 -4 0 0 1689.03 87.59
 -4 0 0 1600.14 86.99
 -4 0 0 1600.94 87.29
 5 0 0 4.9 3.2
 5 0 0 8.8 4.4
 5 0 0 6.5 3.7
 5 0 0 12.2 3
 5 0 0 6 3.6
 5 0 0 7.3 3.8
 5 0 0 7.3 1.2
 5 0 0 6.5 1.3
 5 0 0 7.5 3.2
 5 0 0 7.9 3.2
 5 0 0 12.3 3.9
 5 0 0 6 3.9
 5 0 0 6.3 3.3
 5 0 0 5.2 4.1
 5 0 0 4.7 4.5
 -5 0 0 9 4.1
 -5 0 0 4.7 3.6
 -5 0 0 4.3 4
 -5 0 0 6.9 4.6
 -5 0 0 8.6 3.7
 -5 0 0 8.3 4.4
 -5 0 0 7.5 4.1
 -5 0 0 5.4 4.1
 6 0 0 195.38 12.5
 6 0 0 175.28 13
 6 0 0 173.98 14.5
 6 0 0 183.98 13.8
 6 0 0 168.18 12.8
 6 0 0 177.58 12.4
 6 0 0 173.78 12.9
 6 0 0 187.08 10.2
 6 0 0 179.68 10
 6 0 0 154.58 14
 6 0 0 171.38 14.6
 6 0 0 171.88 12.8
 6 0 0 165.38 13.3
 6 0 0 171.48 13.8
 6 0 0 184.38 13.8
 -6 0 0 208.68 15
 -6 0 0 183.18 13.6
 -6 0 0 203.78 14.5
 -6 0 0 187.78 14.2
 -6 0 0 174.68 13.4
 -6 0 0 182.58 15
 -6 0 0 186.88 14.2
 7 0 0 7.1 5.5
 7 0 0 14.2 4.1
 7 0 0 13.2 5
 7 0 0 14 4.2
 7 0 0 7 4.8
 7 0 0 15.9 4.6
 7 0 0 2 4.3
 7 0 0 8.9 4.4
 7 0 0 13.8 4.9
 7 0 0 13 4.4
 7 0 0 12.3 6
 7 0 0 11.5 4.2
 7 0 0 14.6 5.1
 -7 0 0 19.7 5.9
 -7 0 0 10.3 6
 -7 0 0 14 5.9
 -7 0 0 12 5.2
 -7 0 0 17.1 5.7
 -7 0 0 11.6 5
 -7 0 0 18.4 6.7
 8 0 0 310.07 21.1
 8 0 0 315.37 20.6
 8 0 0 317.57 17.2
 8 0 0 289.57 21.1
 8 0 0 300.87 21.9
 8 0 0 330.27 17.3
 8 0 0 313.97 21.2
 8 0 0 284.97 23.6
 8 0 0 314.17 23.6
 8 0 0 307.47 23.5
 8 0 0 297.17 22
 8 0 0 328.27 20.7
 8 0 0 349.67 22.7
 8 0 0 302.07 22.3
 8 0 0 329.27 16.9
 8 0 0 331.27 17
 8 0 0 319.27 21.1
 -8 0 0 348.57 23.4
 -8 0 0 322.47 22.3
 -8 0 0 328.97 22.8
 -8 0 0 305.37 23.2
 -8 0 0 344.77 25
 -8 0 0 290.67 23.7
 9 0 0 0.6 4
 9 0 0 5.3 5.7
 9 0 0 12.3 6.3
 9 0 0 0.9 4.4
 9 0 0 -0.7 5.5
 9 0 0 -1 1.5
 9 0 0 -1.7 5.2
 9 0 0 -1.6 4.6
 9 0 0 -0.4 1.7
 9 0 0 1.7 4.2
 9 0 0 2 6.6
 9 0 0 2.7 4.8
 9 0 0 -4.6 5.2
 -9 0 0 1.1 6.4
 -9 0 0 -1.8 6.8
 -9 0 0 1.9 6.2
 -9 0 0 10.8 6.3
 10 0 0 224.88 16.8
 10 0 0 222.68 12.7
 10 0 0 202.78 19.5
 10 0 0 230.78 20.9
 10 0 0 220.78 18.2
 10 0 0 226.58 12.8
 10 0 0 216.58 17.3
 10 0 0 210.68 18.2
 -10 0 0 236.68 20.8
 -10 0 0 244.68 20.7
 -10 0 0 199.58 19.2
 -10 0 0 230.58 19.9
 11 0 0 -0.2 5.1
 11 0 0 -0.4 6.1
 11 0 0 0.3 4.8
 11 0 0 -10.1 4.3
 11 0 0 5.9 4.1
 11 0 0 1.3 1.8
 11 0 0 -0.6 1.4
 -11 0 0 12.4 7.8
 -11 0 0 3.5 7.2
 -11 0 0 8.3 8.6
 12 0 0 20.8 6.4
 12 0 0 20.1 2.8
 12 0 0 10.3 6
 12 0 0 20.3 2.7
 -12 0 0 15 9.3
 13 0 0 -2.5 1.5
 13 0 0 2.7 1.9
 13 0 0 16.5 6.2
 13 0 0 -3.4 5.1
 14 0 0 30 7.9
 14 0 0 42.4 9.1
 14 0 0 38.8 3.8
 15 0 0 1.6 5.6
 15 0 0 1.8 6
 15 0 -1 75.59 11.2
 14 0 -1 3.1 5.4
 14 0 -1 1.4 5.6
 13 0 -1 1.4 5.5
 13 0 -1 2.4 1.7
 13 0 -1 -3 1.4
 13 0 -1 0.9 5.5
 12 0 -1 -4.9 4.7
 12 0 -1 -2.1 1.3
 12 0 -1 1.6 1.7
 12 0 -1 0.7 5.2
 -11 0 1 16.4 8.1
 11 0 -1 -2.4 4.9
 11 0 -1 8.2 2.1
 11 0 -1 9 7.4
 11 0 -1 17.9 6.3
 11 0 -1 1.7 5.1
 11 0 -1 6.6 1.6
 -10 0 1 11 7.6
 -10 0 1 -7.7 6.8
 -10 0 1 -3.5 6.3
 -10 0 1 1.1 7.4
 10 0 -1 -2.7 4.3
 10 0 -1 4.2 4.9
 10 0 -1 1.7 1.5
 10 0 -1 -13.3 5.5
 10 0 -1 0.5 1.2
 10 0 -1 2 4.6
 10 0 -1 -0.8 5
 10 0 -1 -0.1 5.8
 10 0 -1 -0.6 4.6
 -9 0 1 229.48 20
 -9 0 1 243.28 19.2
 -9 0 1 250.87 21.4
 -9 0 1 234.88 19.7
 -9 0 1 260.87 20.1
 9 0 -1 250.67 19.5
 9 0 -1 246.98 18
 9 0 -1 257.37 18.3
 9 0 -1 256.97 17.9
 9 0 -1 249.08 14
 9 0 -1 233.98 20.9
 9 0 -1 236.28 17.9
 9 0 -1 239.98 20.8
 9 0 -1 247.38 13.3
 9 0 -1 230.38 17.4
 9 0 -1 257.07 18.2
 9 0 -1 233.28 17.5
 -8 0 1 -9.9 5.9
 -8 0 1 -2.9 4.9
 -8 0 1 -5.7 4.8
 -8 0 1 -4.8 4.6
 -8 0 1 -4.1 4.9
 -8 0 1 -2.9 5
 8 0 -1 -1.5 4.9
 8 0 -1 2.9 4.7
 8 0 -1 -2.4 3.9
 8 0 -1 -0.7 3.8
 8 0 -1 -2.4 3.6
 8 0 -1 2.1 3.7
 8 0 -1 -0.6 4.1
 8 0 -1 -2.8 3.3
 8 0 -1 -2.3 3.8
 8 0 -1 -5 3.6
 8 0 -1 2.6 4
 8 0 -1 3.9 6.2
 8 0 -1 2.7 5.7
 -7 0 1 247.68 17.6
 -7 0 1 248.68 18.2
 -7 0 1 275.47 19.6
 -7 0 1 258.87 19
 7 0 -1 226.48 17.3
 7 0 -1 241.08 19.1
 7 0 -1 232.88 16.7
 7 0 -1 257.07 18.9
 7 0 -1 256.07 18.1
 7 0 -1 247.48 17
 7 0 -1 258.57 19.2
 7 0 -1 247.18 17.7
 7 0 -1 227.68 17.9
 7 0 -1 246.58 17
 7 0 -1 243.18 16.8
 7 0 -1 243.18 16.6
 7 0 -1 263.47 16.8
 -6 0 1 -2.1 4.4
 -6 0 1 -5.3 3.6
 -6 0 1 -0.9 3.5
 -6 0 1 -2.7 3.5
 -6 0 1 0 3.8
 -6 0 1 4.4 4.6
 -6 0 1 -3.7 3.2
 -6 0 1 0.3 4
 -6 0 1 -4.1 3.5
 6 0 -1 -6.3 2.8
 6 0 -1 2.6 4.4
 6 0 -1 -5.2 2.7
 6 0 -1 -0.9 3.1
 6 0 -1 -2.9 2.6
 6 0 -1 -0.1 0.6
 6 0 -1 -0.2 3.1
 6 0 -1 -1.2 2.8
 6 0 -1 1.5 2.9
 6 0 -1 -0.4 3.6
 6 0 -1 -2.9 3.3
 6 0 -1 -1.1 3.4
 -5 0 1 64.89 7.5
 -5 0 1 79.59 7.8
 -5 0 1 77.49 7.4
 -5 0 1 82.89 8
 -5 0 1 75.19 8.6
 -5 0 1 90.79 8.9
 -5 0 1 87.09 9
 -5 0 1 83.89 7.7
 -5 0 1 64.19 7.8
 -5 0 1 82.29 7.4
 -5 0 1 88.69 8.6
 -5 0 1 77.19 8
 5 0 -1 67.39 6.9
 5 0 -1 65.09 7.9
 5 0 -1 65.89 7.8
 5 0 -1 78.09 9.3
 5 0 -1 76.99 9
 5 0 -1 78.89 4.2
 5 0 -1 77.09 4.2
 5 0 -1 64.39 6.9
 5 0 -1 69.69 7.5
 5 0 -1 58.89 6.7
 5 0 -1 67.99 7.3
 5 0 -1 63.79 7
 5 0 -1 83.09 7.4
 5 0 -1 65.79 7.1
 5 0 -1 79.19 8.7
 -4 0 1 2.9 2.6
 -4 0 1 -0.9 2.9
 -4 0 1 -4.5 2.4
 -4 0 1 -0.2 3
 -4 0 1 -2.7 2.3
 -4 0 1 1.6 3.3
 -4 0 1 0.4 2.5
 -4 0 1 0.7 2.6
 -4 0 1 -1.9 2.6
 -4 0 1 -0.3 2.3
 -4 0 1 -0.6 2.9
 -4 0 1 1.8 2.4
 4 0 -1 -0.9 1.9
 4 0 -1 -1.4 3
 4 0 -1 1.1 0.5
 4 0 -1 0.5 2
 4 0 -1 1.6 2.7
 4 0 -1 -0.3 2.5
 4 0 -1 2.6 3
 4 0 -1 -1.1 2.2
 4 0 -1 -1.5 2.6
 4 0 -1 1.4 0.5
 4 0 -1 -0.9 2.1
 4 0 -1 -0.7 2.5
 4 0 -1 -2.4 1.8
 4 0 -1 -0.5 2.8
 -3 0 1 118.49 8.8
 -3 0 1 116.79 8.3
 -3 0 1 114.39 9
 -3 0 1 116.59 8.5
 -3 0 1 105.79 8
 -3 0 1 112.89 8.8
 -3 0 1 126.89 8.4
 -3 0 1 113.99 8.2
 -3 0 1 117.79 8.6
 -3 0 1 111.09 8.5
 -3 0 1 109.69 8.4
 -3 0 1 133.29 8.4
 3 0 -1 129.69 8.3
 3 0 -1 112.39 9
 3 0 -1 127.69 8.7
 3 0 -1 124.89 8.2
 3 0 -1 122.39 8.1
 3 0 -1 129.89 8.1
 3 0 -1 116.99 8.4
 3 0 -1 119.59 8.6
 3 0 -1 130.29 9.4
 3 0 -1 141.59 8.4
 3 0 -1 124.89 8.9
 3 0 -1 120.59 8.3
 -2 0 1 -1.4 2.2
 -2 0 1 -0.1 1.9
 -2 0 1 2.8 2.2
 -2 0 1 5.3 2.7
 -2 0 1 -0.6 1.9
 -2 0 1 -0.5 2.3
 -2 0 1 -2.7 2.1
 -2 0 1 1 1.9
 -2 0 1 -1.9 2.1
 -2 0 1 0.6 1.9
 -2 0 1 3.1 1.9
 -2 0 1 -2.4 2.8
 2 0 -1 -5 2.1
 2 0 -1 -0.5 1.8
 2 0 -1 2.1 1.8
 2 0 -1 2.9 2.1
 2 0 -1 1.1 2.4
 2 0 -1 1.5 2.3
 2 0 -1 -1.5 1.7
 2 0 -1 2.2 3
 2 0 -1 -1.4 1.7
 2 0 -1 -1.2 1.7
 2 0 -1 -0.4 1.8
 2 0 -1 0.3 2.6
 1 0 -1 0 0.2
 1 0 1 762.42 41.1
 1 0 1 765.72 41
 -1 0 -1 814.22 40.5
 -1 0 -1 773.72 40.6
 2 0 1 0.2 2.5
 2 0 1 2.9 2.7
 2 0 1 1 1.9
 2 0 1 -1.3 1.5
 2 0 1 0 1.3
 2 0 1 -2 1.9
 2 0 1 0.1 1.1
 2 0 1 -1 0.9
 2 0 1 -2.3 1.7
 2 0 1 0.1 1.9
 2 0 1 2.5 1.4
 2 0 1 2.8 3.2
 2 0 1 1.4 0.8
 2 0 1 4.2 1.1
 2 0 1 -1.8 2.2
 -2 0 -1 -0.1 2.7
 -2 0 -1 -1.1 2.7
 -2 0 -1 1.4 3.2
 -2 0 -1 -0.8 3.3
 -2 0 -1 0.8 2.2
 -2 0 -1 1 2.2
 -2 0 -1 -0.1 1.4
 -2 0 -1 -1 1.8
 -2 0 -1 -1.2 1
 -2 0 -1 -0.8 2.5
 3 0 1 4998.2 268.47
 -3 0 -1 5210.08 268.57
 -3 0 -1 5278.67 269.07
 4 0 1 -0.9 2.8
 4 0 1 -3.4 2.3
 4 0 1 -2.7 2.6
 4 0 1 -2.4 3.1
 4 0 1 -0.2 0.8
 4 0 1 1.5 2.8
 4 0 1 -0.2 2
 4 0 1 1.3 1.4
 4 0 1 0.1 2.4
 4 0 1 -0.2 2.1
 4 0 1 0.8 3.1
 4 0 1 0.1 1.7
 4 0 1 6.8 2.6
 4 0 1 -0.8 2.5
 4 0 1 1.4 3.3
 -4 0 -1 -1.3 2.9
 -4 0 -1 2 3.5
 -4 0 -1 0.7 0.7
 -4 0 -1 0.3 3.1
 -4 0 -1 -1.2 2.3
 -4 0 -1 -2.6 2.8
 -4 0 -1 6.3 3.9
 -4 0 -1 0.2 0.7
 -4 0 -1 3 3.7
 -4 0 -1 1.6 2.8
 5 0 1 288.27 18.4
 5 0 1 277.27 19.6
 5 0 1 278.97 17.5
 5 0 1 289.27 18.9
 5 0 1 267.77 18.5
 5 0 1 296.87 15.7
 5 0 1 310.87 16.3
 5 0 1 275.57 19.5
 5 0 1 273.57 18.9
 5 0 1 279.37 19.2
 5 0 1 295.67 18.4
 5 0 1 323.97 18.6
 5 0 1 296.57 15.6
 5 0 1 270.07 18
 5 0 1 278.07 17.8
 5 0 1 302.97 17.4
 5 0 1 298.77 16
 -5 0 -1 311.07 20.2
 -5 0 -1 298.77 18.1
 -5 0 -1 290.27 19
 -5 0 -1 310.37 19.3
 -5 0 -1 301.57 19.3
 -5 0 -1 278.17 19.5
 -5 0 -1 275.77 18.4
 -5 0 -1 300.67 18.7
 6 0 1 -1.3 3.6
 6 0 1 0.2 1.5
 6 0 1 3.7 4.5
 6 0 1 -2.8 3.8
 6 0 1 -2.3 2.4
 6 0 1 3.8 3
 6 0 1 -0.4 3.1
 6 0 1 -0.5 1.1
 6 0 1 -4.1 3
 6 0 1 0.9 3.2
 6 0 1 -0.3 2.9
 6 0 1 1.3 1.2
 6 0 1 -1.9 3.8
 6 0 1 1.9 2.7
 6 0 1 0.4 1
 6 0 1 -5.9 2.9
 6 0 1 4.2 4.5
 -6 0 -1 0.7 3.4
 -6 0 -1 -8.8 3.2
 -6 0 -1 3.9 5.1
 -6 0 -1 -0.6 4.1
 -6 0 -1 1.7 4.3
 -6 0 -1 -3.6 4.2
 7 0 1 485.95 31.4
 7 0 1 480.75 32.8
 7 0 1 472.75 30.6
 7 0 1 514.45 27.7
 7 0 1 531.95 27.6
 7 0 1 488.55 30.9
 7 0 1 511.05 31.9
 7 0 1 511.65 31.3
 7 0 1 490.55 30
 7 0 1 492.55 30.5
 7 0 1 493.35 31.6
 7 0 1 537.15 28.1
 7 0 1 464.35 32.1
 7 0 1 516.45 32.8
 7 0 1 553.94 31.2
 7 0 1 528.05 29.9
 7 0 1 535.65 27.7
 -7 0 -1 557.74 32.6
 -7 0 -1 527.55 32
 -7 0 -1 527.95 32.2
 -7 0 -1 557.24 31.8
 -7 0 -1 504.35 32.9
 -7 0 -1 572.44 33.3
 8 0 1 4.3 4.4
 8 0 1 12.9 4.8
 8 0 1 2.2 2
 8 0 1 4.5 1.9
 8 0 1 2.9 5.4
 8 0 1 0.9 3.7
 8 0 1 6.3 6.9
 8 0 1 1.3 1.5
 8 0 1 12.5 6.8
 8 0 1 2.6 1.9
 8 0 1 5 5.1
 8 0 1 9 5.1
 8 0 1 12.9 4.4
 8 0 1 9.6 5.6
 8 0 1 7.6 6.3
 8 0 1 4.6 4.5
 8 0 1 13.2 5
 -8 0 -1 9.5 7.1
 -8 0 -1 12.4 6.3
 -8 0 -1 3.2 7.1
 -8 0 -1 17.6 7
 -8 0 -1 9.8 5.6
 -8 0 -1 7.7 6.4
 9 0 1 453.85 28.4
 9 0 1 435.16 29.9
 9 0 1 410.66 27.2
 9 0 1 419.66 29.2
 9 0 1 421.76 30.2
 9 0 1 425.56 28.4
 9 0 1 417.66 24.2
 9 0 1 491.55 27.4
 9 0 1 395.26 28.9
 9 0 1 421.56 24.1
 9 0 1 422.66 23.5
 9 0 1 464.05 31
 9 0 1 447.86 23.8
 9 0 1 418.56 28.8
 9 0 1 434.06 28.3
 -9 0 -1 463.95 31.1
 -9 0 -1 512.95 30.9
 -9 0 -1 491.65 30.8
 -9 0 -1 458.25 31.3
 -9 0 -1 465.95 30.2
 10 0 1 -4.6 3.7
 10 0 1 -2.5 5.1
 10 0 1 5 4.3
 10 0 1 0.6 5.1
 10 0 1 -2.5 1.7
 10 0 1 1.8 4.5
 10 0 1 -1.2 1.7
 10 0 1 -5.5 6
 -10 0 -1 6.2 6.8
 -10 0 -1 4.2 6.9
 -10 0 -1 1.3 7.3
 -10 0 -1 -6.2 6.2
 11 0 1 87.49 11.9
 11 0 1 73.99 5.8
 11 0 1 108.19 14.7
 11 0 1 70.49 5.9
 11 0 1 66.19 9.2
 11 0 1 85.99 10.6
 -11 0 -1 72.59 13
 -11 0 -1 72.89 13.1
 -11 0 -1 87.09 14.9
 12 0 1 1.9 2.3
 12 0 1 0.2 4.7
 12 0 1 -2.6 1.8
 12 0 1 -0.3 5.5
 -12 0 -1 -7.5 7.7
 13 0 1 20.4 3.3
 13 0 1 29.1 7.2
 13 0 1 23.7 3.5
 13 0 1 20.7 7.6
 -13 0 -1 25.8 11.4
 14 0 1 5.9 6.4
 14 0 1 4.2 2.3
 14 0 1 -3.7 4.8
 15 0 1 -6 4.8
 15 0 1 0.5 6
 15 0 -2 -1.9 5.6
 15 0 -2 -7.4 5.6
 14 0 -2 318.37 25.1
 14 0 -2 374.66 24.6
 13 0 -2 -9 4.8
 13 0 -2 0.7 1.1
 13 0 -2 -5.2 5.8
 12 0 -2 423.76 22.8
 12 0 -2 420.16 28.1
 12 0 -2 470.45 29.3
 12 0 -2 421.26 23.3
 11 0 -2 0.8 1.1
 11 0 -2 5.1 4.8
 11 0 -2 4.7 4.9
 11 0 -2 0.1 1.5
 -10 0 2 678.33 42.9
 -10 0 2 675.33 42.5
 10 0 -2 667.93 41.9
 10 0 -2 656.73 40.8
 10 0 -2 711.53 43.3
 10 0 -2 662.33 43.8
 10 0 -2 642.84 39.9
 10 0 -2 734.13 41.1
 10 0 -2 640.24 42.3
 10 0 -2 698.53 35.6
 10 0 -2 645.84 40.6
 10 0 -2 659.43 44.7
 10 0 -2 705.33 35.8
 10 0 -2 706.63 44.4
 -9 0 2 8.6 6.4
 -9 0 2 6.3 6.7
 -9 0 2 -2.4 5.7
 -9 0 2 13.3 6.7
 -9 0 2 -0.6 6
 9 0 -2 2.7 5.3
 9 0 -2 -1.2 4.5
 9 0 -2 2.9 5.1
 9 0 -2 3.7 5
 9 0 -2 3 4.6
 9 0 -2 -0.8 4.7
 9 0 -2 6.7 4.4
 9 0 -2 -4.3 4
 9 0 -2 4.8 4.6
 9 0 -2 -4.8 3.2
 9 0 -2 -0.2 4.6
 -8 0 2 135.69 12.8
 -8 0 2 122.69 12.9
 -8 0 2 114.99 12.6
 -8 0 2 116.89 12.4
 -8 0 2 127.99 14.9
 -8 0 2 135.39 13.3
 8 0 -2 134.69 13.2
 8 0 -2 119.29 11
 8 0 -2 127.79 10.9
 8 0 -2 127.79 12.6
 8 0 -2 135.59 11.6
 8 0 -2 133.09 14.4
 8 0 -2 114.99 11
 8 0 -2 128.89 11.5
 8 0 -2 124.99 11.5
 8 0 -2 133.49 11.4
 8 0 -2 139.39 12.3
 8 0 -2 128.89 14.2
 8 0 -2 126.99 13.3
 8 0 -2 116.09 11.5
 -7 0 2 -5.7 4
 -7 0 2 -6.4 4.6
 -7 0 2 -1.8 3.8
 -7 0 2 -1.4 4.2
 -7 0 2 -2.4 5
 -7 0 2 -6.9 3.7
 7 0 -2 -1 3.5
 7 0 -2 -3 3.4
 7 0 -2 -3.5 3.9
 7 0 -2 5.6 5.3
 7 0 -2 -0.9 3
 7 0 -2 -7.2 3.6
 7 0 -2 5 4.9
 7 0 -2 -1.9 3.4
 7 0 -2 -3.2 2.9
 7 0 -2 0.9 3.5
 7 0 -2 -2.8 4.6
 7 0 -2 -4.8 2.6
 7 0 -2 -2.4 3.8
 7 0 -2 -0.2 3.5
 -6 0 2 105.69 10.6
 -6 0 2 126.69 11.1
 -6 0 2 107.59 9.9
 -6 0 2 106.89 10.2
 -6 0 2 122.59 10.6
 -6 0 2 128.59 11.5
 -6 0 2 118.69 10
 -6 0 2 120.79 10.3
 -6 0 2 101.79 10
 6 0 -2 108.99 10.2
 6 0 -2 105.39 9.5
 6 0 -2 102.99 9.4
 6 0 -2 129.49 11.7
 6 0 -2 114.59 9.5
 6 0 -2 124.09 9.6
 6 0 -2 102.39 9.8
 6 0 -2 113.09 9
 6 0 -2 111.69 9.3
 6 0 -2 111.69 9.6
 6 0 -2 123.79 10.8
 6 0 -2 94.99 9.7
 6 0 -2 100.19 10.5
 6 0 -2 115.09 11.4
 -5 0 2 1 3.6
 -5 0 2 -1 3.5
 -5 0 2 -0.9 3.5
 -5 0 2 0.2 3.3
 -5 0 2 -1.4 3.5
 -5 0 2 0.6 3.5
 -5 0 2 3.9 4.2
 -5 0 2 -0.3 3.3
 -5 0 2 1.9 3.3
 -5 0 2 -3.9 3.1
 -5 0 2 -1 3.3
 5 0 -2 2 2.8
 5 0 -2 -0.5 2.4
 5 0 -2 -3.6 3.6
 5 0 -2 -1.1 3.5
 5 0 -2 0.6 0.6
 5 0 -2 -1 3.2
 5 0 -2 -1.9 2.6
 5 0 -2 -3.1 2.8
 5 0 -2 4.2 3.7
 5 0 -2 -0.3 2.9
 5 0 -2 -2.1 3.6
 5 0 -2 2.1 3.5
 5 0 -2 -3.6 2.6
 5 0 -2 -1.7 2.6
 5 0 -2 1.7 0.8
 -4 0 2 295.97 16.8
 -4 0 2 299.67 17.8
 -4 0 2 271.97 17.3
 -4 0 2 239.58 16.9
 -4 0 2 291.27 17.1
 -4 0 2 283.07 16.8
 -4 0 2 284.37 17.2
 -4 0 2 286.67 16.9
 -4 0 2 290.07 17.4
 -4 0 2 259.87 16.7
 -4 0 2 272.77 17
 4 0 -2 262.77 16.4
 4 0 -2 252.97 16
 4 0 -2 273.27 14.7
 4 0 -2 263.87 16.6
 4 0 -2 261.37 17.8
 4 0 -2 277.47 16.8
 4 0 -2 276.17 17.1
 4 0 -2 271.87 16.5
 4 0 -2 283.47 18
 4 0 -2 262.57 16.8
 4 0 -2 263.17 17.4
 4 0 -2 268.37 17.4
 4 0 -2 281.47 14.6
 4 0 -2 295.57 16.9
 4 0 -2 283.97 16.4
 -3 0 2 2.3 2.7
 -3 0 2 1.8 2.5
 -3 0 2 -1.6 2.3
 -3 0 2 0.3 1.9
 -3 0 2 1 2.3
 -3 0 2 -2.1 1.9
 -3 0 2 -2.3 1.9
 -3 0 2 -0.4 2
 -3 0 2 -0.4 2.1
 -3 0 2 1.1 2.1
 3 0 -2 -0.3 2.5
 3 0 -2 -1 2.5
 3 0 -2 -3.1 1.6
 3 0 -2 1.6 2.1
 3 0 -2 -0.1 2.6
 3 0 -2 -1 1.5
 3 0 -2 0.6 2.6
 3 0 -2 1.3 1.9
 3 0 -2 -2 1.9
 3 0 -2 0.3 0.7
 3 0 -2 -0.3 2.2
 3 0 -2 -1.3 1.8
 3 0 -2 1 1.6
 3 0 -2 0.1 0.9
 3 0 -2 -1 2
 -2 0 2 0.2 0.2
 -1 0 2 0.5 0.7
 -1 0 2 2.1 1.4
 -1 0 2 0.6 0.7
 -1 0 2 1 1
 -1 0 2 1.2 0.6
 -1 0 2 0 0.7
 -1 0 2 -0.3 0.2
 -1 0 2 0.4 0.9
 -1 0 2 0.3 0.9
 -1 0 2 1.5 1.1
 -1 0 2 0.8 0.6
 -1 0 2 -0.7 0.9
 1 0 -2 0.1 0.9
 1 0 -2 1.1 0.7
 1 0 -2 -0.8 1.2
 1 0 -2 0.3 0.6
 1 0 -2 1.2 0.9
 1 0 -2 0.8 1.1
 1 0 -2 0 0.7
 1 0 -2 -0.6 0.4
 1 0 -2 0.4 1
 1 0 -2 0.1 0.5
 1 0 -2 0.3 0.5
 1 0 -2 0.3 0.5
 1 0 2 -0.9 1.2
 1 0 2 1.5 0.6
 1 0 2 -0.1 1
 1 0 2 -0.2 1
 1 0 2 0.1 0.7
 1 0 2 0.5 1.2
 1 0 2 -0.2 1.2
 1 0 2 -0.5 0.7
 -1 0 -2 2.3 0.8
 -1 0 -2 2.1 1.3
 -1 0 -2 -0.1 1.1
 -1 0 -2 -0.3 0.9
 -1 0 -2 0.5 1
 -1 0 -2 1 1.2
 -1 0 -2 1.9 1.1
 2 0 2 56.89 4.6
 2 0 2 71.49 6
 2 0 2 65.69 4.4
 2 0 2 56.39 4.2
 2 0 2 65.99 4.7
 2 0 2 60.29 4.3
 2 0 2 59.19 5.7
 2 0 2 62.59 4.6
 2 0 2 75.49 6
 2 0 2 62.29 4.9
 2 0 2 67.69 5.4
 -2 0 -2 70.49 6.6
 -2 0 -2 71.09 4.5
 -2 0 -2 61.39 5.2
 -2 0 -2 63.09 4.5
 -2 0 -2 70.69 4.2
 -2 0 -2 71.39 5.8
 -2 0 -2 74.59 4.8
 -2 0 -2 71.69 6
 -2 0 -2 59.99 4.5
 -2 0 -2 60.99 6.1
 3 0 2 -1.7 1
 3 0 2 -0.3 1.4
 3 0 2 1.8 2.8
 3 0 2 -1 1.1
 3 0 2 -0.4 1.6
 3 0 2 2.7 2.6
 3 0 2 -2.3 1.7
 3 0 2 0.4 1.3
 3 0 2 -1 1.2
 3 0 2 -2.5 2.4
 3 0 2 -2.6 1.2
 3 0 2 -2.8 2.5
 3 0 2 4.4 2.5
 3 0 2 -2.6 2.2
 -3 0 -2 1.3 1.4
 -3 0 -2 -0.9 2.7
 -3 0 -2 -2.1 2.7
 -3 0 -2 4 3.2
 -3 0 -2 0.4 1.6
 -3 0 -2 0.4 3.3
 -3 0 -2 -0.7 1.2
 -3 0 -2 -3 2.4
 -3 0 -2 1.6 3
 4 0 2 2614.44 126.69
 4 0 2 2539.35 127.29
 4 0 2 2455.95 125.39
 4 0 2 2273.67 125.89
 4 0 2 2546.35 126.49
 4 0 2 2409.66 127.49
 4 0 2 2257.57 125.39
 4 0 2 2323.07 124.79
 4 0 2 2442.96 125.19
 4 0 2 2279.07 125.89
 4 0 2 2271.47 126.69
 4 0 2 2402.36 124.69
 4 0 2 2709.23 127.29
 4 0 2 2237.88 126.69
 -4 0 -2 2478.25 126.99
 -4 0 -2 2467.55 127.79
 -4 0 -2 2225.98 126.69
 -4 0 -2 2433.76 125.89
 -4 0 -2 2540.35 124.79
 -4 0 -2 2489.55 125.39
 -4 0 -2 2307.67 127.39
 -4 0 -2 2303.17 126.99
 -4 0 -2 2212.48 126.29
 5 0 2 -2.6 2.4
 5 0 2 -3.6 3.7
 5 0 2 -1.8 1.3
 5 0 2 7.4 3.9
 5 0 2 -0.1 3.3
 5 0 2 -4.3 1.8
 5 0 2 -3.7 2.8
 5 0 2 0 1.8
 5 0 2 -6.2 2.2
 5 0 2 -0.8 3.8
 5 0 2 -0.9 1.5
 5 0 2 -3.9 3.5
 5 0 2 0.1 2.1
 -5 0 -2 -0.3 2.5
 -5 0 -2 -0.8 1.1
 -5 0 -2 -2.1 4.1
 -5 0 -2 -6.4 3.5
 -5 0 -2 -0.9 0.9
 -5 0 -2 2.1 3.9
 -5 0 -2 -8.8 3.2
 -5 0 -2 1.4 3.8
 6 0 2 347.77 23.1
 6 0 2 369.36 20.1
 6 0 2 381.76 22.8
 6 0 2 361.26 23.2
 6 0 2 326.57 21.8
 6 0 2 372.76 20.5
 6 0 2 348.27 22.3
 6 0 2 380.86 21.4
 6 0 2 368.46 19.9
 6 0 2 352.36 23.5
 6 0 2 372.06 22.6
 6 0 2 354.26 23.4
 6 0 2 363.56 24.1
 6 0 2 339.57 21.4
 6 0 2 380.76 20.1
 6 0 2 331.87 22.3
 -6 0 -2 367.66 23.8
 -6 0 -2 380.96 23.1
 -6 0 -2 365.46 23.6
 -6 0 -2 355.56 24.2
 -6 0 -2 365.06 23.5
 -6 0 -2 366.86 24.7
 7 0 2 1.4 3
 7 0 2 0.6 3.1
 7 0 2 -3.1 3.7
 7 0 2 -1.3 2
 7 0 2 -1.3 1.5
 7 0 2 -6.2 3.8
 7 0 2 -3.8 3.5
 7 0 2 -0.5 3.6
 7 0 2 -1.5 1.7
 7 0 2 1.6 3
 7 0 2 -1 3.6
 7 0 2 0.9 1.5
 7 0 2 0.6 4.2
 7 0 2 -1.9 4.3
 7 0 2 -2.3 4.2
 7 0 2 1.1 3.6
 -7 0 -2 2.1 5.5
 -7 0 -2 -1.3 5.3
 -7 0 -2 4.8 5.1
 -7 0 -2 -2.2 4.4
 -7 0 -2 7 5.3
 -7 0 -2 -4.7 5
 8 0 2 3196.48 171.58
 8 0 2 3303.07 171.98
 8 0 2 3238.08 168.58
 8 0 2 3189.38 171.88
 8 0 2 2919.61 172.08
 8 0 2 3315.27 168.18
 8 0 2 3146.19 168.28
 8 0 2 3292.67 173.28
 8 0 2 3203.28 170.48
 8 0 2 3194.38 172.58
 8 0 2 3406.86 170.18
 8 0 2 3082.89 170.98
 8 0 2 3160.38 171.48
 8 0 2 3193.18 172.98
 8 0 2 3359.06 168.18
 -8 0 -2 3115.79 173.78
 -8 0 -2 3426.46 173.48
 -8 0 -2 3355.96 172.78
 -8 0 -2 3202.58 173.68
 -8 0 -2 3314.77 173.08
 9 0 2 7.5 4.3
 9 0 2 2.1 2.5
 9 0 2 8.3 5.4
 9 0 2 10.6 5.3
 9 0 2 -2.8 3.9
 9 0 2 1.4 1.7
 9 0 2 -8 4.6
 9 0 2 4.1 6.2
 9 0 2 7.5 5.7
 9 0 2 1.6 2.2
 9 0 2 0.5 5.5
 9 0 2 -1 1.8
 9 0 2 -0.1 2.3
 9 0 2 6.9 5.6
 9 0 2 6.1 4.3
 -9 0 -2 6.5 6.9
 -9 0 -2 -1.6 6.3
 -9 0 -2 2.5 7.1
 -9 0 -2 -1.7 7.5
 -9 0 -2 10.1 6.9
 10 0 2 104.19 10.2
 10 0 2 93.39 6.8
 10 0 2 104.49 11.7
 10 0 2 90.99 9.9
 10 0 2 99.99 10.3
 10 0 2 100.99 7.4
 10 0 2 109.89 14.1
 10 0 2 104.59 6.6
 10 0 2 94.79 10.9
 10 0 2 96.39 7.4
 -10 0 -2 94.89 13.8
 -10 0 -2 113.69 13.8
 -10 0 -2 111.49 15.6
 -10 0 -2 109.79 14.8
 -10 0 -2 111.19 15
 11 0 2 1.2 4
 11 0 2 -2.4 6.3
 11 0 2 1.5 2.3
 11 0 2 9.5 4
 11 0 2 3.5 2.4
 -11 0 -2 13.8 8.7
 -11 0 -2 6 8.7
 -11 0 -2 8.2 8
 12 0 2 -6.5 4.1
 12 0 2 7.3 5.8
 12 0 2 5 2.6
 12 0 2 -0.1 2.3
 -12 0 -2 3.1 9.6
 -12 0 -2 -8.2 8.3
 -12 0 -2 4.7 7.9
 13 0 2 3.4 2.6
 13 0 2 -0.6 1.9
 13 0 2 -7.9 4.2
 13 0 2 -4.2 6
 -13 0 -2 -3.9 9.4
 -13 0 -2 -10.8 8
 14 0 2 47 4.8
 14 0 2 42.8 9.5
 14 0 2 22.2 6.6
 -14 0 -2 33.7 12.2
 15 0 2 7.4 6.9
 15 0 -3 -3.2 5.3
 15 0 -3 8.1 7.3
 14 0 -3 -2.4 5
 14 0 -3 2.3 6.1
 13 0 -3 16.8 6
 13 0 -3 8 6.5
 12 0 -3 2.8 5.8
 12 0 -3 1.8 1.1
 12 0 -3 -0.5 1.3
 12 0 -3 7.3 5.6
 11 0 -3 615.74 34.2
 11 0 -3 665.93 40.1
 11 0 -3 698.03 39
 11 0 -3 641.24 33.9
 -10 0 3 1.9 6.5
 10 0 -3 7.4 6.5
 10 0 -3 6.1 6.2
 10 0 -3 4.4 5
 10 0 -3 12.7 6.7
 10 0 -3 -1 1.1
 10 0 -3 0.4 5.3
 10 0 -3 0.9 4.5
 10 0 -3 -1.6 4.3
 10 0 -3 12.4 5.5
 10 0 -3 9.1 7
 10 0 -3 10.5 5.5
 10 0 -3 1.4 0.9
 10 0 -3 -1.1 5.2
 -9 0 3 357.06 24
 -9 0 3 354.36 24.4
 -9 0 3 304.77 24.6
 -9 0 3 308.57 23.8
 -9 0 3 351.66 24.7
 9 0 -3 371.66 23.6
 9 0 -3 336.77 22.7
 9 0 -3 333.67 24.7
 9 0 -3 345.27 26.1
 9 0 -3 315.67 23.2
 9 0 -3 343.47 23.2
 9 0 -3 362.36 22.3
 9 0 -3 322.37 24.2
 9 0 -3 354.16 26.4
 9 0 -3 353.36 24.5
 9 0 -3 325.07 22.6
 9 0 -3 330.97 27.3
 9 0 -3 362.96 25.4
 9 0 -3 365.96 25.4
 -8 0 3 -7.4 4.7
 -8 0 3 1.5 5.6
 -8 0 3 0.3 5.1
 -8 0 3 3.4 5.3
 -8 0 3 -3.4 4.4
 -8 0 3 -3.7 5
 -8 0 3 -3.2 4.8
 8 0 -3 1.3 3.6
 8 0 -3 2.7 4.2
 8 0 -3 -7.7 4.3
 8 0 -3 -1.6 4.6
 8 0 -3 -2.4 3.7
 8 0 -3 -4.2 3.7
 8 0 -3 -9.7 5.5
 8 0 -3 -3.5 3.3
 8 0 -3 -6.4 5.7
 8 0 -3 -0.3 3.8
 8 0 -3 -0.9 4.5
 8 0 -3 -1.2 4
 8 0 -3 1.8 4.3
 8 0 -3 -0.4 4.9
 -7 0 3 341.97 21.8
 -7 0 3 330.07 21.6
 -7 0 3 322.77 23.7
 -7 0 3 301.07 21.3
 -7 0 3 315.27 21.7
 -7 0 3 325.47 21.7
 -7 0 3 336.77 21.6
 -7 0 3 297.37 22
 7 0 -3 303.17 20.3
 7 0 -3 342.17 23.4
 7 0 -3 357.96 20.4
 7 0 -3 332.57 22.7
 7 0 -3 318.67 21.4
 7 0 -3 324.47 23.3
 7 0 -3 316.87 20.6
 7 0 -3 320.87 20.9
 7 0 -3 292.87 21.4
 7 0 -3 328.77 21.1
 7 0 -3 340.97 21.1
 7 0 -3 325.87 22.6
 7 0 -3 339.27 21.4
 7 0 -3 314.37 20.6
 -6 0 3 -2.1 3.9
 -6 0 3 -2.9 3.8
 -6 0 3 -3.4 3.6
 -6 0 3 -0.7 3.5
 -6 0 3 5.1 3.8
 -6 0 3 -0.4 3.8
 -6 0 3 2 3.8
 -6 0 3 -0.8 3.8
 -6 0 3 2.1 3.8
 6 0 -3 1 0.8
 6 0 -3 2.6 4.8
 6 0 -3 2.5 3.5
 6 0 -3 -2.4 3.2
 6 0 -3 4.3 3.3
 6 0 -3 -3.9 2.3
 6 0 -3 3 3
 6 0 -3 -2.9 3
 6 0 -3 -4.6 4
 6 0 -3 -1.6 3.2
 6 0 -3 1.1 0.8
 6 0 -3 -1.2 3.1
 6 0 -3 -3.3 3.5
 6 0 -3 -4.2 3.7
 6 0 -3 -0.1 4
 -5 0 3 73.39 7.3
 -5 0 3 73.69 7.6
 -5 0 3 59.39 7.6
 -5 0 3 75.89 7.5
 -5 0 3 70.99 7.1
 -5 0 3 61.59 7.5
 -5 0 3 61.09 7.1
 -5 0 3 60.19 7
 -5 0 3 83.39 8
 5 0 -3 68.99 4.4
 5 0 -3 63.99 6.1
 5 0 -3 66.79 6.6
 5 0 -3 57.39 7.2
 5 0 -3 67.49 7.9
 5 0 -3 69.39 8.3
 5 0 -3 56.59 8.6
 5 0 -3 62.79 4.2
 5 0 -3 62.59 7.1
 5 0 -3 63.49 8.5
 5 0 -3 83.79 7.3
 5 0 -3 58.89 6.3
 5 0 -3 67.09 8.8
 5 0 -3 56.59 6.1
 5 0 -3 57.39 7.8
 -4 0 3 -0.5 2.3
 -4 0 3 -0.6 2.8
 -4 0 3 0 2.7
 -4 0 3 0.8 2.7
 -4 0 3 -1.8 2.5
 -4 0 3 -0.6 2.3
 -4 0 3 0.8 3
 -4 0 3 -4 2.7
 -4 0 3 -2.6 3.1
 4 0 -3 -4.4 2.6
 4 0 -3 -4.1 2.5
 4 0 -3 1.6 3.6
 4 0 -3 2.4 2.6
 4 0 -3 0.2 1
 4 0 -3 -2.3 2
 4 0 -3 -2.2 2.3
 4 0 -3 0.3 1.2
 4 0 -3 3.9 3.1
 4 0 -3 1.3 3.5
 4 0 -3 -1.5 2.4
 4 0 -3 -2.2 2
 4 0 -3 -0.8 2.2
 4 0 -3 -2.2 2.3
 4 0 -3 1.9 2
 -3 0 3 213.48 13.7
 -3 0 3 228.28 13.5
 -3 0 3 227.98 13.5
 -3 0 3 207.18 13
 -3 0 3 203.38 13.7
 -3 0 3 229.78 13.4
 -3 0 3 216.88 13.6
 -3 0 3 241.28 12.3
 -3 0 3 245.28 12.2
 -3 0 3 208.88 13.8
 -3 0 3 236.58 13.6
 -3 0 3 210.18 14.3
 3 0 -3 233.58 12.5
 3 0 -3 218.18 14.3
 3 0 -3 221.38 14
 3 0 -3 224.18 14.5
 3 0 -3 206.88 13.3
 3 0 -3 220.08 11.9
 3 0 -3 235.08 13.6
 3 0 -3 234.18 13.5
 3 0 -3 214.18 13
 3 0 -3 220.68 13.1
 3 0 -3 222.18 13.6
 3 0 -3 233.78 13.1
 3 0 -3 221.68 13.2
 3 0 -3 234.98 13.9
 3 0 -3 232.38 13.7
 3 0 -3 230.08 14.5
 -2 0 3 1.3 1.7
 -2 0 3 -0.7 1.9
 -2 0 3 0.1 2.3
 -2 0 3 0.6 2.2
 -2 0 3 4.4 2.1
 -2 0 3 -1.8 1.6
 -2 0 3 -1.8 2.2
 -2 0 3 -0.1 1.6
 -2 0 3 0.7 0.5
 -2 0 3 0 1.5
 2 0 -3 0.4 1.5
 2 0 -3 2.1 1.7
 2 0 -3 -1.2 1.4
 2 0 -3 1.6 1
 2 0 -3 0 2.1
 2 0 -3 1.2 0.9
 2 0 -3 2 2.7
 2 0 -3 1 1.8
 2 0 -3 0.1 1.5
 2 0 -3 1.4 1.2
 2 0 -3 0.5 1.6
 2 0 -3 0.3 1.7
 2 0 -3 0.6 1.7
 0 0 3 1.9 1.7
 0 0 3 -0.4 1.2
 0 0 3 -1 1.2
 0 0 3 0.7 1.1
 0 0 3 0.1 0.7
 0 0 3 -0.2 1.1
 0 0 3 1.2 0.6
 0 0 -3 -0.8 0.9
 0 0 -3 1.3 1.2
 0 0 -3 -0.1 1.3
 0 0 -3 -0.3 1.3
 0 0 -3 0.9 0.6
 0 0 -3 1.7 1.2
 0 0 -3 -0.4 1.3
 2 0 3 -2.7 2.3
 2 0 3 2.3 1.8
 2 0 3 -0.1 1.5
 2 0 3 0.1 2.5
 2 0 3 2.4 1.3
 2 0 3 -0.3 1.9
 2 0 3 0.2 1.1
 2 0 3 1.9 2.1
 2 0 3 -0.2 1.3
 -2 0 -3 -0.7 1.7
 -2 0 -3 1.1 1.4
 -2 0 -3 -0.6 2.4
 -2 0 -3 -2.3 2.4
 -2 0 -3 0.3 1
 -2 0 -3 -0.1 1.7
 -2 0 -3 0.2 1.3
 -2 0 -3 3.5 2.7
 -2 0 -3 -1.2 1.5
 3 0 3 236.78 13.9
 3 0 3 235.88 14.2
 3 0 3 244.48 14.8
 3 0 3 247.28 13.7
 3 0 3 257.37 15.4
 3 0 3 230.38 13.5
 3 0 3 246.58 14.7
 3 0 3 249.08 13.6
 3 0 3 260.27 15.2
 3 0 3 230.78 13.8
 3 0 3 221.68 13.8
 -3 0 -3 253.57 15.9
 -3 0 -3 219.18 13.4
 -3 0 -3 243.98 15.2
 -3 0 -3 229.08 15
 -3 0 -3 245.38 15.4
 -3 0 -3 252.17 14
 -3 0 -3 256.37 13.4
 -3 0 -3 229.88 13.7
 -3 0 -3 236.68 14.7
 -3 0 -3 247.38 13.9
 -3 0 -3 260.47 13.8
 4 0 3 12.5 2.5
 4 0 3 1.8 3.2
 4 0 3 -4.1 2.1
 4 0 3 0.1 1.6
 4 0 3 -1.4 2
 4 0 3 -2.2 2.8
 4 0 3 3.2 3.8
 4 0 3 0.3 1.9
 4 0 3 0.3 1.7
 4 0 3 -1.5 1.7
 4 0 3 2.8 3.2
 4 0 3 -1.1 2.2
 4 0 3 1.7 3.1
 -4 0 -3 0.5 0.6
 -4 0 -3 -0.9 3.3
 -4 0 -3 4.6 3.6
 -4 0 -3 1.1 2.2
 -4 0 -3 1.3 4.2
 -4 0 -3 3.2 4.1
 -4 0 -3 1.8 1.8
 -4 0 -3 1.4 3.8
 -4 0 -3 12.1 4.9
 -4 0 -3 2.7 1.8
 5 0 3 122.79 10.9
 5 0 3 143.69 9.2
 5 0 3 126.99 10.6
 5 0 3 141.49 10.6
 5 0 3 135.99 9.2
 5 0 3 142.19 11.4
 5 0 3 126.69 12
 5 0 3 136.39 9.2
 5 0 3 142.19 11.2
 5 0 3 129.49 9.8
 5 0 3 123.79 9.7
 5 0 3 132.59 8.7
 5 0 3 141.69 8.6
 -5 0 -3 129.39 11.4
 -5 0 -3 147.49 12.7
 -5 0 -3 143.49 9.1
 -5 0 -3 134.19 11.4
 -5 0 -3 128.19 9.5
 -5 0 -3 121.99 10.6
 -5 0 -3 141.69 11.7
 -5 0 -3 126.29 12
 -5 0 -3 145.29 8.4
 6 0 3 -1.4 3.1
 6 0 3 -3 3.6
 6 0 3 -1.4 1.7
 6 0 3 -3.3 2.2
 6 0 3 -1.1 1.9
 6 0 3 4.5 3.8
 6 0 3 -3.2 3.8
 6 0 3 -3.6 2.2
 6 0 3 -1.3 1.6
 6 0 3 -2.8 2.7
 6 0 3 -2.8 4
 6 0 3 -2 3.4
 6 0 3 -2 2.2
 6 0 3 -2.3 3.4
 6 0 3 -2.5 2.8
 -6 0 -3 -5.7 3.8
 -6 0 -3 -4.2 4
 -6 0 -3 -0.6 1.3
 -6 0 -3 -3.6 4.2
 -6 0 -3 -0.6 1.3
 -6 0 -3 -1.2 5
 -6 0 -3 -5.2 4.3
 7 0 3 340.47 23.8
 7 0 3 363.16 22.7
 7 0 3 356.76 21.8
 7 0 3 359.46 20.7
 7 0 3 325.77 23.6
 7 0 3 378.06 21.3
 7 0 3 346.17 22.8
 7 0 3 379.96 21.7
 7 0 3 391.66 24.7
 7 0 3 384.86 20.6
 7 0 3 345.97 23.1
 7 0 3 361.56 20.7
 7 0 3 339.17 24
 7 0 3 367.06 23.5
 7 0 3 340.97 23
 -7 0 -3 390.76 24.9
 -7 0 -3 371.26 25.6
 -7 0 -3 373.86 25
 -7 0 -3 385.96 24.6
 8 0 3 12.4 6.6
 8 0 3 10.8 5.3
 8 0 3 0.9 2.5
 8 0 3 0 5.8
 8 0 3 7.8 3.8
 8 0 3 20.5 6.5
 8 0 3 5.4 5
 8 0 3 14.1 4.2
 8 0 3 3.6 4.7
 8 0 3 9.2 4.6
 8 0 3 4.1 4.4
 8 0 3 0.1 2.9
 8 0 3 -2.9 2.3
 8 0 3 0.8 5.4
 8 0 3 1 2.4
 -8 0 -3 13.9 8.3
 -8 0 -3 3.4 6.5
 -8 0 -3 -1.2 6.2
 -8 0 -3 4.2 6.7
 -8 0 -3 13.1 7.1
 9 0 3 23.8 3.9
 9 0 3 22.5 6.9
 9 0 3 17.9 7.1
 9 0 3 23.9 4.2
 9 0 3 20 6.7
 9 0 3 19.8 5.4
 9 0 3 18.6 6.4
 9 0 3 19.3 7.4
 9 0 3 13 4.8
 9 0 3 20.7 3.4
 9 0 3 16 6.4
 9 0 3 19.3 3.7
 9 0 3 11.9 5.4
 -9 0 -3 28.7 9.2
 -9 0 -3 36.9 9.6
 -9 0 -3 20.2 9.1
 -9 0 -3 22.3 8.1
 -9 0 -3 34.3 9.4
 10 0 3 -3.3 2.1
 10 0 3 0.4 5.7
 10 0 3 -1.2 2.5
 10 0 3 4.1 4.8
 10 0 3 0 2.4
 10 0 3 -0.9 2
 10 0 3 0.1 3.7
 10 0 3 -1.9 3.6
 10 0 3 -1.6 5
 10 0 3 1.6 3.5
 -10 0 -3 1.2 6.4
 -10 0 -3 -0.1 6.6
 -10 0 -3 5.6 6.8
 -10 0 -3 2.2 5.7
 -10 0 -3 0.2 6.9
 11 0 3 504.55 28.8
 11 0 3 426.56 33.9
 11 0 3 526.45 28
 11 0 3 523.55 27.7
 11 0 3 520.85 33.5
 11 0 3 524.15 28.9
 11 0 3 519.95 33.4
 -11 0 -3 497.25 35.6
 -11 0 -3 530.85 36.9
 -11 0 -3 480.45 36.9
 -11 0 -3 537.75 34.8
 12 0 3 5.4 2.6
 12 0 3 -1.3 4
 12 0 3 6 6.2
 12 0 3 -2.4 2.2
 -12 0 -3 16.5 9.3
 -12 0 -3 11.6 9
 -12 0 -3 8.8 9.7
 13 0 3 34.3 4.9
 13 0 3 28.1 6.5
 13 0 3 32 4.7
 -13 0 -3 21.4 11
 -13 0 -3 42.1 12.9
 14 0 3 2.8 2.6
 14 0 3 -4 4.4
 14 0 3 -8.1 5.6
 -14 0 -3 -3.8 9.4
 -14 0 -3 15 10.1
 15 0 3 72.09 8.9
 15 0 3 103.79 13
 15 0 -4 -2.6 5.7
 15 0 -4 2.2 7
 14 0 -4 105.99 13.6
 14 0 -4 101.99 11.7
 13 0 -4 0 5
 13 0 -4 -6.5 5.9
 12 0 -4 5 5.1
 12 0 -4 3.3 1.2
 12 0 -4 2.8 1.4
 12 0 -4 17.1 7.2
 11 0 -4 8.1 6
 11 0 -4 -0.5 1.1
 11 0 -4 -2.3 4.4
 -10 0 4 625.64 39
 10 0 -4 617.24 38.1
 10 0 -4 602.04 40.9
 10 0 -4 601.04 38.9
 10 0 -4 672.03 37.9
 10 0 -4 622.84 38.5
 10 0 -4 694.53 38.4
 10 0 -4 572.24 39.7
 10 0 -4 582.44 37.2
 10 0 -4 610.74 40.3
 10 0 -4 543.35 40.6
 -9 0 4 6.6 6.2
 -9 0 4 -3.5 6
 -9 0 4 10.1 6
 9 0 -4 1.8 0.9
 9 0 -4 1.7 4.3
 9 0 -4 8.1 6.8
 9 0 -4 0.9 5.3
 9 0 -4 4 6.3
 9 0 -4 2.6 1.3
 9 0 -4 -1.7 4.2
 9 0 -4 3.5 4.5
 9 0 -4 8.7 5.5
 9 0 -4 -1.5 4.1
 9 0 -4 7.9 5.3
 9 0 -4 2.6 4.3
 9 0 -4 3.5 4.4
 9 0 -4 12 5.4
 -8 0 4 -2.3 5
 -8 0 4 2.5 5.4
 -8 0 4 8.5 6
 -8 0 4 1.4 5
 -8 0 4 -1.9 5.7
 -8 0 4 -9.3 4.7
 8 0 -4 1.4 4.1
 8 0 -4 -0.1 4.3
 8 0 -4 -8.8 4.7
 8 0 -4 3.7 0.8
 8 0 -4 -0.8 5.1
 8 0 -4 5.5 4.3
 8 0 -4 -1.5 5.3
 8 0 -4 -5.8 4.1
 8 0 -4 -2.1 5.4
 8 0 -4 3.2 3.8
 8 0 -4 1.2 4.1
 8 0 -4 -0.8 3.8
 8 0 -4 -1.1 4.3
 8 0 -4 3 4.5
 8 0 -4 6.1 4.3
 -7 0 4 -4.6 4.3
 -7 0 4 -3.2 4.6
 -7 0 4 3.8 4.4
 -7 0 4 -6.6 3.9
 -7 0 4 -5.5 3.8
 -7 0 4 -4.7 3.8
 7 0 -4 0.3 3.5
 7 0 -4 0.1 3.7
 7 0 -4 0.5 0.9
 7 0 -4 -3.6 3.1
 7 0 -4 -3.5 4.2
 7 0 -4 -5.5 2.9
 7 0 -4 -1.2 4.1
 7 0 -4 0.8 0.6
 7 0 -4 4.5 3.3
 7 0 -4 -4.5 3.2
 7 0 -4 0.6 0.6
 7 0 -4 2.9 3.3
 7 0 -4 -4.8 3.5
 7 0 -4 -1.3 3.3
 7 0 -4 0.7 4.7
 7 0 -4 0.5 0.9
 7 0 -4 1.5 4.9
 -6 0 4 122.49 11.2
 -6 0 4 116.99 10.6
 -6 0 4 132.29 10.9
 -6 0 4 116.59 10.6
 -6 0 4 143.69 11.4
 -6 0 4 143.59 11.1
 -6 0 4 115.99 11.2
 -6 0 4 122.79 10.6
 6 0 -4 114.29 10.2
 6 0 -4 123.79 10.2
 6 0 -4 130.89 11.8
 6 0 -4 124.99 10.6
 6 0 -4 123.49 10
 6 0 -4 143.49 9.7
 6 0 -4 131.69 6.9
 6 0 -4 112.69 11.5
 6 0 -4 119.69 12.4
 6 0 -4 128.39 9.9
 6 0 -4 116.89 11.9
 6 0 -4 126.49 7.5
 6 0 -4 127.99 12.2
 6 0 -4 112.59 10.2
 6 0 -4 134.79 7.7
 -5 0 4 1.6 3.2
 -5 0 4 -4.9 2.8
 -5 0 4 1.4 3.2
 -5 0 4 -2.5 3.3
 -5 0 4 -3.1 3.6
 -5 0 4 1.5 3.2
 -5 0 4 -0.3 3.3
 -5 0 4 -0.9 3.2
 5 0 -4 -2.1 2.5
 5 0 -4 -2.8 2.4
 5 0 -4 4.1 3.4
 5 0 -4 -3 3.2
 5 0 -4 -2.6 3
 5 0 -4 0.3 4
 5 0 -4 -1.6 2.9
 5 0 -4 -0.9 1.2
 5 0 -4 0.7 1.5
 5 0 -4 1.2 2.7
 5 0 -4 0.2 4.7
 5 0 -4 -2.9 3.6
 5 0 -4 2.1 2.3
 5 0 -4 0.4 0.8
 5 0 -4 -1.9 2.8
 5 0 -4 -6.6 3
 -4 0 4 2148.69 105.59
 -4 0 4 2073.79 107.99
 -4 0 4 1785.72 107.59
 -4 0 4 2068.09 107.29
 -4 0 4 1955.9 107.79
 -4 0 4 2105.19 105.69
 -4 0 4 2142.49 107.39
 -4 0 4 2088.99 107.79
 -4 0 4 2102.09 107.49
 -4 0 4 2151.88 107.49
 4 0 -4 1943.31 107.49
 4 0 -4 2005.4 106.79
 4 0 -4 2016.8 108.69
 4 0 -4 2012.7 108.69
 4 0 -4 1966.7 107.29
 4 0 -4 2195.38 107.79
 4 0 -4 2001.6 107.29
 4 0 -4 2019.2 106.39
 4 0 -4 1941.21 107.89
 4 0 -4 2044.6 107.09
 4 0 -4 1987.9 105.59
 4 0 -4 1967.7 106.09
 4 0 -4 2042.3 105.59
 4 0 -4 2081.79 107.59
 4 0 -4 2168.18 107.99
 4 0 -4 1991.1 108.59
 4 0 -4 1957.6 106.89
 -3 0 4 -0.8 2.5
 -3 0 4 -3 2.8
 -3 0 4 2.3 1.8
 -3 0 4 1.7 2.3
 -3 0 4 -2.1 1.8
 -3 0 4 0.3 1.7
 -3 0 4 -0.6 1.9
 -3 0 4 0.6 2.1
 -3 0 4 -0.8 1
 -3 0 4 -1.5 2.3
 3 0 -4 0.8 2.1
 3 0 -4 1.5 3
 3 0 -4 -4.5 1.7
 3 0 -4 0.4 1.7
 3 0 -4 0.8 1
 3 0 -4 0.8 1.8
 3 0 -4 -0.2 1
 3 0 -4 -1 1.8
 3 0 -4 1.3 1.5
 3 0 -4 -1 1.9
 3 0 -4 -0.7 1.5
 3 0 -4 -1.2 2.2
 3 0 -4 0.9 1.4
 3 0 -4 1.8 1.9
 -2 0 4 3940.21 203.48
 2 0 -4 3902.31 202.98
 2 0 -4 3908.51 203.48
 -1 0 4 1.9 1.8
 -1 0 4 -1.7 1.4
 -1 0 4 -0.3 1.5
 -1 0 4 0.9 1.8
 -1 0 4 1.2 1.8
 -1 0 4 -2.1 1.5
 -1 0 4 6.2 2.1
 1 0 -4 -0.6 1.9
 1 0 -4 -0.9 2.4
 1 0 -4 1.4 1.8
 1 0 -4 0.6 1.8
 1 0 -4 0.3 1.5
 1 0 -4 -0.7 2.5
 1 0 -4 2.8 1.7
 0 0 4 697.53 33.5
 0 0 4 574.04 33.2
 0 0 4 640.64 33.5
 0 0 4 686.53 32.6
 0 0 4 636.04 33.6
 0 0 4 591.64 32.9
 0 0 4 586.84 33.9
 0 0 -4 613.74 33.3
 0 0 -4 615.54 32.6
 0 0 -4 666.33 33.2
 0 0 -4 677.33 33
 0 0 -4 614.64 33.4
 0 0 -4 550.24 33.5
 0 0 -4 607.54 33.8
 0 0 -4 561.34 33.4
 1 0 4 1.7 1.9
 1 0 4 0.6 1.8
 1 0 4 0.4 0.8
 1 0 4 -1.8 1.6
 1 0 4 0 2
 1 0 4 0.1 1.8
 1 0 4 -2.2 2.3
 1 0 4 0 2.2
 -1 0 -4 0.7 2.2
 -1 0 -4 -0.2 2.5
 -1 0 -4 1.2 1.9
 -1 0 -4 -1 2
 -1 0 -4 0.6 2.1
 -1 0 -4 3.3 2
 -1 0 -4 -0.3 1.5
 2 0 4 3042.8 158.88
 2 0 4 3026.3 159.28
 2 0 4 2864.71 158.88
 -2 0 -4 3067.89 159.28
 -2 0 -4 3145.49 159.38
 -2 0 -4 3095.79 158.98
 -2 0 -4 3110.09 158.98
 3 0 4 0.6 1.3
 3 0 4 -2.1 0.8
 3 0 4 -1.9 1.8
 3 0 4 -1.2 2.3
 3 0 4 0.8 2.4
 3 0 4 -0.7 1.3
 3 0 4 -0.9 1.4
 3 0 4 -0.1 2.3
 3 0 4 -0.5 1.6
 3 0 4 -2 2.3
 -3 0 -4 -0.4 1.7
 -3 0 -4 -0.8 2.5
 -3 0 -4 1.7 2.9
 -3 0 -4 -1.1 1.7
 -3 0 -4 -2.9 1.6
 -3 0 -4 -1.7 2.6
 -3 0 -4 -1.5 2.9
 -3 0 -4 -0.2 1.3
 -3 0 -4 2 1.5
 -3 0 -4 0.6 1.1
 4 0 4 1764.82 95.69
 4 0 4 1982.5 96.49
 4 0 4 1936.71 96.59
 4 0 4 1800.52 95.29
 4 0 4 1739.53 94.79
 4 0 4 1773.52 95.09
 4 0 4 1956 96.99
 4 0 4 1745.33 94.99
 4 0 4 1753.52 95.29
 4 0 4 1680.93 95.49
 4 0 4 1758.92 94.79
 4 0 4 1928.51 97.19
 -4 0 -4 1802.02 94.49
 -4 0 -4 1736.43 94.89
 -4 0 -4 1767.82 96.99
 -4 0 -4 1719.83 96.69
 -4 0 -4 1926.61 95.39
 -4 0 -4 1814.62 94.99
 -4 0 -4 1885.01 98.09
 -4 0 -4 1808.22 95.29
 -4 0 -4 1881.71 94.39
 -4 0 -4 1841.82 96.79
 -4 0 -4 1695.23 97.39
 5 0 4 1.9 3.8
 5 0 4 0.6 2.4
 5 0 4 -2.2 1.6
 5 0 4 -0.4 3.4
 5 0 4 -0.9 3.1
 5 0 4 -2.9 2.9
 5 0 4 0.9 2
 5 0 4 -1.8 1.8
 5 0 4 1.2 2.4
 5 0 4 -1.7 2.4
 5 0 4 2.1 1.9
 5 0 4 -4 3
 -5 0 -4 -1.7 1.4
 -5 0 -4 -0.4 2
 -5 0 -4 -1.9 1.6
 -5 0 -4 4.1 4.5
 -5 0 -4 1.6 1.9
 -5 0 -4 -2.5 3.4
 -5 0 -4 1.9 4.1
 -5 0 -4 7.4 4.3
 -5 0 -4 0.6 4.5
 6 0 4 724.63 43.1
 6 0 4 779.72 40.7
 6 0 4 759.52 40.4
 6 0 4 727.43 42.6
 6 0 4 768.22 42.6
 6 0 4 749.13 41.6
 6 0 4 749.82 40.6
 6 0 4 754.02 40.9
 6 0 4 717.03 41.1
 6 0 4 776.92 40.7
 6 0 4 722.43 43.4
 6 0 4 683.93 42.7
 6 0 4 731.53 43.3
 6 0 4 740.23 43
 -6 0 -4 764.82 40.1
 -6 0 -4 766.42 44.9
 -6 0 -4 822.72 43.7
 -6 0 -4 743.63 43.7
 -6 0 -4 713.53 43.3
 -6 0 -4 696.23 44.1
 7 0 4 0.9 4.3
 7 0 4 3.2 4
 7 0 4 1.9 4.4
 7 0 4 -1.5 2.5
 7 0 4 0.9 2.8
 7 0 4 1.5 2.2
 7 0 4 -2.4 2.9
 7 0 4 4.8 4.2
 7 0 4 -1.8 3
 7 0 4 2.2 2.8
 7 0 4 -1 3.8
 7 0 4 -3.3 4.2
 7 0 4 3.2 2.4
 7 0 4 -2.5 3.7
 7 0 4 3.8 2.3
 -7 0 -4 2.8 5.4
 -7 0 -4 -0.7 1.5
 -7 0 -4 -4.2 5.1
 -7 0 -4 -0.9 4.8
 -7 0 -4 -0.2 1.4
 -7 0 -4 4.6 5.3
 -7 0 -4 6.7 6.6
 8 0 4 2779.12 146.69
 8 0 4 2586.74 144.89
 8 0 4 2807.92 142.79
 8 0 4 2860.91 146.39
 8 0 4 2705.43 145.99
 8 0 4 2812.62 142.89
 8 0 4 2556.24 143.99
 8 0 4 2659.23 142.19
 8 0 4 2488.05 145.69
 8 0 4 2271.37 144.49
 8 0 4 2565.04 142.99
 8 0 4 2832.42 142.09
 -8 0 -4 2760.82 145.99
 -8 0 -4 2861.11 147.89
 -8 0 -4 2689.53 147.79
 -8 0 -4 2922.01 147.09
 -8 0 -4 2956.9 146.89
 9 0 4 2.1 3.8
 9 0 4 -1.4 2.8
 9 0 4 0.8 3.2
 9 0 4 3.3 4.5
 9 0 4 0.9 2.9
 9 0 4 -1.8 3.3
 9 0 4 1.7 4.8
 9 0 4 11.5 6.2
 9 0 4 3.7 4.5
 9 0 4 8.1 5.2
 9 0 4 -4.1 5.6
 9 0 4 -3.8 2.4
 -9 0 -4 6.2 6.6
 -9 0 -4 4.2 8.2
 -9 0 -4 5.8 7
 -9 0 -4 15.2 7.1
 -9 0 -4 6.2 7.2
 10 0 4 -0.1 2.3
 10 0 4 -8.4 3.2
 10 0 4 5.5 5.2
 10 0 4 0.2 2.5
 10 0 4 -0.5 4.5
 10 0 4 9.9 4.2
 10 0 4 5.2 3.8
 10 0 4 1.3 2.5
 10 0 4 -0.9 3
 10 0 4 3.4 5.4
 -10 0 -4 3.3 6.6
 -10 0 -4 4.7 7.5
 -10 0 -4 7.9 8.1
 -10 0 -4 4.9 6.5
 -10 0 -4 -13.2 5.7
 11 0 4 2.9 4
 11 0 4 2.2 2.3
 11 0 4 -0.7 3.7
 11 0 4 6.5 2.6
 11 0 4 3.6 3
 11 0 4 1.2 5.3
 11 0 4 3.7 3
 11 0 4 -13.8 5.5
 -11 0 -4 1.2 6
 -11 0 -4 2.9 8.1
 -11 0 -4 -8.3 6.5
 -11 0 -4 4.1 9
 12 0 4 427.46 28.5
 12 0 4 444.46 24.4
 12 0 4 452.35 26.2
 12 0 4 468.35 24.7
 12 0 4 444.46 27.4
 12 0 4 439.06 26
 -12 0 -4 477.45 35.7
 -12 0 -4 452.15 34.7
 -12 0 -4 438.06 33.4
 13 0 4 -2.7 3.9
 13 0 4 -0.2 2.9
 13 0 4 3.1 3
 -13 0 -4 -4 8.2
 -13 0 -4 -10 7.6
 14 0 4 31.4 4.7
 14 0 4 23.3 8
 14 0 4 27.3 5.9
 -14 0 -4 22 10.4
 -14 0 -4 27.3 12.3
 15 0 4 8.8 6.8
 -15 0 -4 4.3 11.8
 14 0 -5 0.4 5.4
 13 0 -5 130.09 15.7
 13 0 -5 142.69 13.1
 12 0 -5 3 6.1
 12 0 -5 0.1 1.2
 12 0 -5 4.2 1.9
 12 0 -5 -2.1 4.4
 -11 0 5 886.51 55.29
 11 0 -5 982.4 54.99
 11 0 -5 913.81 48.8
 11 0 -5 896.01 48.4
 11 0 -5 944.11 52.29
 -10 0 5 9.8 7.9
 -10 0 5 -0.3 5.9
 -10 0 5 4.9 6.2
 10 0 -5 2.3 6.1
 10 0 -5 13.3 7.6
 10 0 -5 -0.1 1.8
 10 0 -5 0.3 1.3
 10 0 -5 3.8 5.4
 10 0 -5 7 6.7
 10 0 -5 9.8 6.3
 10 0 -5 -1 5.1
 10 0 -5 6.7 5.2
 10 0 -5 1.1 4.9
 -9 0 5 871.11 50.09
 -9 0 5 745.63 50.79
 -9 0 5 808.62 50.39
 -9 0 5 856.11 50.49
 -9 0 5 880.91 51.29
 9 0 -5 858.01 45
 9 0 -5 833.12 50.39
 9 0 -5 836.82 50.09
 9 0 -5 941.41 50.89
 9 0 -5 833.32 49
 9 0 -5 896.51 49.3
 9 0 -5 884.01 50.09
 9 0 -5 851.71 49.99
 9 0 -5 921.51 52.89
 9 0 -5 809.82 54.09
 9 0 -5 859.41 45.3
 9 0 -5 815.02 62.49
 9 0 -5 813.12 53.09
 9 0 -5 941.81 48.5
 -8 0 5 0.8 5.3
 -8 0 5 -7.4 4.3
 -8 0 5 -4.4 5.4
 -8 0 5 -3.1 5
 -8 0 5 1.9 5.1
 8 0 -5 -3.3 3.2
 8 0 -5 -7.9 5.2
 8 0 -5 0.1 0.9
 8 0 -5 -4.4 3.4
 8 0 -5 1.3 1.3
 8 0 -5 -4.4 4.5
 8 0 -5 -3.7 3.3
 8 0 -5 5.1 5.8
 8 0 -5 0.5 1.2
 8 0 -5 -1.2 4.5
 8 0 -5 -0.8 0.8
 8 0 -5 0 4
 8 0 -5 -0.1 3.6
 8 0 -5 0.7 4.5
 8 0 -5 0.8 6.1
 8 0 -5 -6.2 4.7
 8 0 -5 1 3.7
 8 0 -5 -4.4 4.3
 -7 0 5 -2.9 5
 -7 0 5 1.3 5
 -7 0 5 -1.2 4
 -7 0 5 -3.7 3.8
 -7 0 5 -4.9 3.8
 -7 0 5 -6 4.1
 7 0 -5 6.9 4.3
 7 0 -5 0.9 2.9
 7 0 -5 1.7 4.8
 7 0 -5 -2.1 4.6
 7 0 -5 -1.8 3.1
 7 0 -5 -0.2 1.3
 7 0 -5 2.3 1.5
 7 0 -5 -4.3 3.5
 7 0 -5 1.7 4
 7 0 -5 -3 3.5
 7 0 -5 1 5.1
 7 0 -5 0.6 1.1
 7 0 -5 1.1 3.1
 7 0 -5 1.9 1.2
 7 0 -5 -2.7 4.9
 7 0 -5 -1.5 3
 7 0 -5 2.1 3.5
 -6 0 5 -2.1 3.6
 -6 0 5 -4.9 3.1
 -6 0 5 3.9 3.9
 -6 0 5 1.1 3.7
 -6 0 5 0.6 4
 -6 0 5 -1.8 3.6
 6 0 -5 2.5 4.7
 6 0 -5 -1.8 3.1
 6 0 -5 -0.6 4
 6 0 -5 -1.5 1.5
 6 0 -5 3.4 2.9
 6 0 -5 3.4 2.6
 6 0 -5 -3.8 3.3
 6 0 -5 -3.5 3.3
 6 0 -5 -0.5 3.3
 6 0 -5 1.4 1.2
 6 0 -5 -0.7 3
 6 0 -5 -1.3 2.8
 6 0 -5 -4.4 4
 6 0 -5 2.5 3.6
 6 0 -5 1 1.3
 6 0 -5 1.9 1.7
 -5 0 5 83.49 8.1
 -5 0 5 90.29 8.6
 -5 0 5 81.39 4.6
 -5 0 5 80.59 4.6
 -5 0 5 86.69 8.2
 -5 0 5 90.39 8.7
 -5 0 5 73.59 7.7
 -5 0 5 80.49 7.7
 -5 0 5 74.89 8.2
 5 0 -5 72.79 5.2
 5 0 -5 73.79 7
 5 0 -5 80.19 5.9
 5 0 -5 83.69 6.8
 5 0 -5 78.29 8
 5 0 -5 70.89 7.6
 5 0 -5 85.99 7.8
 5 0 -5 74.39 9.6
 5 0 -5 74.69 9.6
 5 0 -5 75.19 6
 5 0 -5 79.79 8.6
 5 0 -5 85.19 5.4
 5 0 -5 84.09 9.2
 5 0 -5 86.09 7.7
 5 0 -5 77.29 8
 -4 0 5 -1.9 3
 -4 0 5 0.4 1
 -4 0 5 -2.1 2.9
 -4 0 5 1 2.5
 -4 0 5 -0.7 1.2
 -4 0 5 -3.6 3
 -4 0 5 -3.5 3.1
 -4 0 5 -1.2 2.7
 -4 0 5 -0.5 2.2
 -4 0 5 0.7 2.5
 4 0 -5 -0.3 1.7
 4 0 -5 0.2 2.7
 4 0 -5 2.4 3.5
 4 0 -5 3 2.1
 4 0 -5 2.3 2.9
 4 0 -5 -0.5 2.4
 4 0 -5 0.2 1.7
 4 0 -5 -0.2 2.5
 4 0 -5 1.5 1.4
 4 0 -5 -1.3 1.9
 4 0 -5 0.2 1.2
 4 0 -5 2.5 3.6
 4 0 -5 3 3.3
 4 0 -5 -2.4 2.2
 4 0 -5 1.2 2.6
 4 0 -5 1.5 3.8
 -3 0 5 2171.48 110.39
 -3 0 5 2067.59 109.99
 -3 0 5 1921.31 110.79
 -3 0 5 2079.69 108.89
 -3 0 5 2206.58 110.99
 -3 0 5 1990.8 111.09
 -3 0 5 2104.49 110.19
 -3 0 5 1985.9 110.69
 -3 0 5 2170.68 109.99
 -3 0 5 2126.19 110.39
 3 0 -5 2203.88 110.59
 3 0 -5 2204.08 112.19
 3 0 -5 1946.61 109.99
 3 0 -5 2406.86 110.89
 3 0 -5 1969.6 110.19
 3 0 -5 2140.79 109.89
 3 0 -5 2217.38 110.89
 3 0 -5 2266.97 111.29
 3 0 -5 1991.3 109.59
 3 0 -5 2058.09 110.39
 3 0 -5 2031 110.09
 3 0 -5 2085.69 110.19
 -2 0 5 10 2.6
 -2 0 5 0.4 1.9
 -2 0 5 -0.8 1.7
 -2 0 5 0.7 1.3
 -2 0 5 -0.2 1.2
 -2 0 5 0.1 1.9
 -2 0 5 1.7 2.2
 -2 0 5 2.3 1.2
 -2 0 5 1.4 1.5
 -2 0 5 2.1 1.6
 2 0 -5 4.1 1.8
 2 0 -5 -0.8 1.2
 2 0 -5 3.4 1.8
 2 0 -5 1.4 1.7
 2 0 -5 1.4 1.7
 2 0 -5 -0.6 1.9
 2 0 -5 3.5 2.6
 2 0 -5 0.5 1.3
 2 0 -5 -0.5 1
 2 0 -5 4.5 1.8
 2 0 -5 -1.6 2
 0 0 5 1.8 1.1
 0 0 5 -0.2 2.1
 0 0 5 2.7 2.3
 0 0 5 -0.5 1.8
 0 0 5 2.8 1.4
 0 0 5 4.2 2.9
 0 0 5 3.8 1.9
 0 0 -5 2.5 1.9
 0 0 -5 1.9 2.2
 0 0 -5 1.2 2.3
 0 0 -5 -0.4 1.4
 0 0 -5 3.1 2.5
 0 0 -5 0.8 1.1
 0 0 -5 -0.3 2.4
 0 0 -5 0.2 1.6
 1 0 5 1540.45 87.39
 1 0 5 1712.83 87.09
 1 0 5 1611.54 87.09
 1 0 5 1629.04 85.69
 1 0 5 1534.15 86.59
 1 0 5 1714.13 86.99
 1 0 5 1729.83 86.49
 -1 0 -5 1811.92 86.89
 -1 0 -5 1574.14 87.09
 -1 0 -5 1752.72 86.39
 -1 0 -5 1664.93 86.69
 -1 0 -5 1539.75 86.99
 -1 0 -5 1611.24 86.49
 -1 0 -5 1691.33 87.39
 2 0 5 2 2
 2 0 5 1.1 2.1
 2 0 5 1 1.8
 2 0 5 0.8 1.3
 2 0 5 -1.4 1.6
 2 0 5 -0.1 2
 2 0 5 0.8 2.2
 2 0 5 -1.2 2.2
 2 0 5 1.3 2
 -2 0 -5 3.2 2.2
 -2 0 -5 3.3 2.4
 -2 0 -5 2.1 1.7
 -2 0 -5 4.2 2.5
 -2 0 -5 4.9 1.5
 -2 0 -5 0.2 0.3
 -2 0 -5 -1.2 2
 -2 0 -5 3.6 2.4
 3 0 5 2536.85 128.69
 3 0 5 2258.27 128.19
 3 0 5 2278.87 128.19
 3 0 5 2655.83 129.09
 3 0 5 2488.55 127.39
 3 0 5 2352.56 126.89
 3 0 5 2622.24 129.19
 3 0 5 2514.35 128.09
 3 0 5 2189.48 128.59
 -3 0 -5 2559.44 127.89
 -3 0 -5 2405.06 129.19
 -3 0 -5 2249.77 128.79
 -3 0 -5 2527.75 126.99
 -3 0 -5 2620.94 127.59
 -3 0 -5 2443.06 128.19
 -3 0 -5 2386.26 128.89
 -3 0 -5 2330.37 128.29
 -3 0 -5 2631.44 128.59
 4 0 5 4.4 1.7
 4 0 5 3.6 2
 4 0 5 2.4 2.7
 4 0 5 8.8 3.7
 4 0 5 3.2 1.9
 4 0 5 3.9 3.8
 4 0 5 0 3.3
 4 0 5 4.9 2.4
 4 0 5 2.8 2.4
 4 0 5 1.2 3
 4 0 5 6.7 3.7
 -4 0 -5 5.7 4.1
 -4 0 -5 7.2 2.6
 -4 0 -5 5.7 2.1
 -4 0 -5 3.4 4
 -4 0 -5 5.9 2.8
 -4 0 -5 3.2 1.8
 -4 0 -5 2.4 2.3
 -4 0 -5 2.9 4.3
 -4 0 -5 4.5 3.8
 -4 0 -5 1.5 2
 5 0 5 -0.1 1.9
 5 0 5 2.1 2.5
 5 0 5 -3.3 3.4
 5 0 5 -2.1 1.6
 5 0 5 -1.6 2
 5 0 5 -0.1 3.4
 5 0 5 -2 2.1
 5 0 5 0.8 3
 5 0 5 -4 3.3
 5 0 5 -1.3 3.1
 5 0 5 5.9 2
 -5 0 -5 -1.5 3.6
 -5 0 -5 -4.6 3.7
 -5 0 -5 -1.1 4
 -5 0 -5 -0.2 2
 -5 0 -5 1.1 1.2
 -5 0 -5 3.1 4.4
 -5 0 -5 2.5 1.4
 -5 0 -5 -6.5 4.1
 -5 0 -5 1.7 2
 -5 0 -5 -1.2 1.9
 6 0 5 -2.1 3
 6 0 5 0.8 2.7
 6 0 5 -1.4 2.3
 6 0 5 3.7 2.3
 6 0 5 -1.6 3.8
 6 0 5 -3.1 1.9
 6 0 5 3.6 4.4
 6 0 5 -3.2 3.5
 6 0 5 -2.7 2.1
 6 0 5 -1.7 2
 6 0 5 -4.2 3.4
 -6 0 -5 -1 2
 -6 0 -5 6.1 2.2
 -6 0 -5 -0.1 6.7
 -6 0 -5 7.6 5.1
 -6 0 -5 2.4 5.5
 7 0 5 1320.47 71.59
 7 0 5 1365.16 75.09
 7 0 5 1338.97 73.89
 7 0 5 1360.86 71.29
 7 0 5 1310.77 72.69
 7 0 5 1343.07 72.39
 7 0 5 1326.67 73.69
 7 0 5 1329.47 74.59
 7 0 5 1374.76 71.69
 7 0 5 1423.36 71.49
 7 0 5 1301.57 71.59
 7 0 5 1381.96 72.49
 7 0 5 1208.38 74.29
 -7 0 -5 1343.37 76.09
 -7 0 -5 1325.57 70.79
 -7 0 -5 1386.46 75.19
 -7 0 -5 1308.47 70.79
 -7 0 -5 1263.47 75.99
 -7 0 -5 1396.76 75.49
 -7 0 -5 1324.17 74.49
 8 0 5 1.4 3.1
 8 0 5 6.9 4.1
 8 0 5 4.8 3
 8 0 5 2.6 3.2
 8 0 5 0.5 4.3
 8 0 5 4.5 6.1
 8 0 5 12.1 5.7
 8 0 5 -0.4 3.9
 8 0 5 3.6 3.1
 8 0 5 1.7 2.3
 8 0 5 0.4 2.7
 8 0 5 2.1 3.6
 8 0 5 5.6 4.4
 -8 0 -5 18.3 7.6
 -8 0 -5 10.2 7.9
 -8 0 -5 2.1 2
 -8 0 -5 6 2.4
 -8 0 -5 11.6 7.6
 -8 0 -5 -3.5 7.5
 -8 0 -5 10.1 6.7
 9 0 5 10.1 5.8
 9 0 5 6.7 4
 9 0 5 11.9 4
 9 0 5 6.5 4.8
 9 0 5 12.2 6.5
 9 0 5 8.7 3.6
 9 0 5 10 3.5
 9 0 5 6.4 3.1
 9 0 5 14.6 4.5
 9 0 5 13.2 5.5
 -9 0 -5 11 7.3
 -9 0 -5 21.3 8.5
 -9 0 -5 1.9 6.6
 -9 0 -5 21.5 9
 -9 0 -5 5.5 8
 10 0 5 -1.5 2.5
 10 0 5 -3.2 3.9
 10 0 5 -1.4 2.6
 10 0 5 -1.4 3.2
 10 0 5 10.5 5
 10 0 5 -9.3 3.6
 10 0 5 2.7 2.8
 10 0 5 -3.1 3.1
 10 0 5 1.7 3.7
 -10 0 -5 -2.5 6.2
 -10 0 -5 -3.3 7.6
 -10 0 -5 3.3 6.6
 -10 0 -5 -8.1 5.5
 -10 0 -5 -5.4 5.9
 11 0 5 625.84 34.7
 11 0 5 638.64 35.2
 11 0 5 592.14 34.6
 11 0 5 562.84 37.2
 11 0 5 638.34 34.2
 11 0 5 573.24 35.9
 11 0 5 599.84 34.8
 -11 0 -5 613.24 42.4
 -11 0 -5 610.44 42.9
 -11 0 -5 633.34 39.8
 -11 0 -5 615.14 41.3
 12 0 5 -0.1 4
 12 0 5 -2.6 2.8
 12 0 5 1.1 2.4
 12 0 5 0.1 2.9
 12 0 5 6.7 3.4
 12 0 5 2.7 5
 -12 0 -5 11.9 9.5
 -12 0 -5 9.6 7.8
 -12 0 -5 7.4 8.5
 -12 0 -5 -0.9 9
 13 0 5 13.6 3.8
 13 0 5 -2.1 6.7
 13 0 5 18.1 4.1
 13 0 5 1.5 3.8
 -13 0 -5 10.9 10.2
 -13 0 -5 4.5 8.8
 -13 0 -5 12.2 10.7
 14 0 5 7.7 4
 14 0 5 -4.9 3.4
 -14 0 -5 -11.6 8.4
 -14 0 -5 -3.4 7.4
 15 0 5 8 6.6
 -15 0 -5 6.4 11.4
 -15 0 -5 -2.3 12.1
 15 0 -6 -6.1 4.3
 15 0 -6 11.2 7.4
 14 0 -6 493.85 30.5
 14 0 -6 485.85 34.4
 13 0 -6 4.6 6.9
 13 0 -6 3.5 1.4
 13 0 -6 5.7 5
 12 0 -6 668.03 37
 12 0 -6 713.03 40.8
 12 0 -6 716.33 44.1
 12 0 -6 701.03 37.6
 -11 0 6 0.7 7
 -11 0 6 -5.8 6.7
 11 0 -6 2.2 1.5
 11 0 -6 -2.2 2
 11 0 -6 6.3 6.6
 11 0 -6 -8.6 3.9
 -10 0 6 687.43 45
 -10 0 6 718.03 45.2
 -10 0 6 686.33 46.2
 -10 0 6 749.82 44.9
 10 0 -6 780.62 44.8
 10 0 -6 746.13 39.3
 10 0 -6 722.13 46.9
 10 0 -6 745.93 39.8
 10 0 -6 773.72 45.5
 10 0 -6 740.63 45.2
 10 0 -6 693.93 43.2
 10 0 -6 812.22 43.3
 -9 0 6 9.2 6.7
 -9 0 6 7.6 6.3
 -9 0 6 7.1 6.7
 -9 0 6 7 5.9
 -9 0 6 9.7 7.4
 9 0 -6 2.3 4.1
 9 0 -6 14.5 4.9
 9 0 -6 7.8 7.1
 9 0 -6 8.8 6.4
 9 0 -6 5.7 4.1
 9 0 -6 3.3 1.8
 9 0 -6 4 2.3
 9 0 -6 8.9 5
 9 0 -6 12.7 6.3
 9 0 -6 10.1 5
 9 0 -6 6 5.2
 9 0 -6 15.2 5.7
 9 0 -6 1.5 6.4
 9 0 -6 3 5.8
 -8 0 6 109.09 12.1
 -8 0 6 88.59 11.9
 -8 0 6 76.99 11.7
 -8 0 6 87.39 10.8
 -8 0 6 95.19 12.2
 8 0 -6 97.19 13.3
 8 0 -6 94.79 6.2
 8 0 -6 101.39 8.9
 8 0 -6 86.89 6.5
 8 0 -6 96.29 13.9
 8 0 -6 87.99 11.2
 8 0 -6 81.09 9.6
 8 0 -6 89.19 9.4
 8 0 -6 96.39 6.2
 8 0 -6 90.89 10.4
 8 0 -6 80.49 8.8
 8 0 -6 112.49 14.5
 8 0 -6 95.59 9.9
 8 0 -6 94.49 6.1
 8 0 -6 92.29 12.5
 -7 0 6 5.8 5.5
 -7 0 6 -5.9 4.5
 -7 0 6 -2.7 3.6
 -7 0 6 1.5 5.1
 -7 0 6 -1.1 4.4
 -7 0 6 -0.9 4.6
 7 0 -6 -3.8 3
 7 0 -6 4.7 4.3
 7 0 -6 -8 4.1
 7 0 -6 -1.2 3.5
 7 0 -6 3.5 1.9
 7 0 -6 -5.4 4.7
 7 0 -6 -0.3 1.8
 7 0 -6 1.3 3.6
 7 0 -6 -4.1 2.9
 7 0 -6 -4.2 4.4
 7 0 -6 -5.1 3.6
 7 0 -6 -2.8 1.3
 7 0 -6 -2.8 3.7
 7 0 -6 0.7 1.9
 7 0 -6 3.7 4.5
 7 0 -6 -2 2.8
 -6 0 6 141.29 12.2
 -6 0 6 135.09 12.2
 -6 0 6 128.89 11.3
 -6 0 6 145.39 11.2
 -6 0 6 141.19 11
 -6 0 6 134.29 11.8
 -6 0 6 144.79 12.3
 6 0 -6 115.49 12.6
 6 0 -6 127.59 10.2
 6 0 -6 137.69 11
 6 0 -6 137.49 11.5
 6 0 -6 149.69 9.4
 6 0 -6 144.19 11.3
 6 0 -6 141.99 8.8
 6 0 -6 136.89 8.5
 6 0 -6 145.09 11.8
 6 0 -6 153.58 11.4
 6 0 -6 141.29 12.2
 6 0 -6 153.28 13.6
 6 0 -6 157.98 10.4
 6 0 -6 126.29 10.6
 6 0 -6 128.69 13.2
 6 0 -6 145.29 9.2
 -5 0 6 1 3.1
 -5 0 6 1 3.5
 -5 0 6 1.5 1.4
 -5 0 6 2.9 3.8
 -5 0 6 3.4 3.4
 -5 0 6 1.8 1.7
 -5 0 6 2.5 3.9
 -5 0 6 4.4 3.5
 -5 0 6 1.9 3.8
 5 0 -6 1.1 3
 5 0 -6 2.1 1.8
 5 0 -6 -0.2 2
 5 0 -6 4.9 3.8
 5 0 -6 1.8 1.7
 5 0 -6 2.2 2.5
 5 0 -6 -0.3 3.6
 5 0 -6 6.2 4.4
 5 0 -6 1.5 2.1
 5 0 -6 1.8 3.2
 5 0 -6 1.3 3.1
 5 0 -6 -1.8 2.6
 5 0 -6 3.2 3.3
 5 0 -6 2.8 2.9
 5 0 -6 1.2 3.8
 5 0 -6 -2 2.9
 -4 0 6 1202.98 64.29
 -4 0 6 1066.19 65.09
 -4 0 6 1228.18 63.49
 -4 0 6 1029.6 64.79
 -4 0 6 1226.08 64.49
 -4 0 6 1240.48 65.29
 -4 0 6 1315.37 65.29
 -4 0 6 1247.88 64.29
 4 0 -6 1197.68 66.39
 4 0 -6 1156.38 64.89
 4 0 -6 1246.08 64.29
 4 0 -6 1256.37 63.59
 4 0 -6 1207.48 64.49
 4 0 -6 1303.07 64.79
 4 0 -6 1131.59 63.29
 4 0 -6 1276.77 64.09
 4 0 -6 1152.38 63.99
 4 0 -6 1196.48 64.89
 4 0 -6 1192.78 63.99
 4 0 -6 1162.28 64.29
 -3 0 6 2.7 2
 -3 0 6 1.4 2.9
 -3 0 6 2.2 1.2
 -3 0 6 3.8 3
 -3 0 6 0.9 2.3
 -3 0 6 4.9 2.8
 -3 0 6 12.8 2.9
 -3 0 6 2.4 2
 -3 0 6 2.6 3.2
 -3 0 6 1.5 1.3
 -3 0 6 6.1 2.4
 3 0 -6 2.4 2
 3 0 -6 9.4 2.9
 3 0 -6 3.7 2.2
 3 0 -6 3.3 2.3
 3 0 -6 2.1 3.2
 3 0 -6 3 2.2
 3 0 -6 3.6 3.6
 3 0 -6 2.8 1.8
 3 0 -6 3.2 2.4
 3 0 -6 1.6 2.5
 3 0 -6 3.4 2.5
 -2 0 6 4619.04 234.48
 -2 0 6 4522.45 234.28
 2 0 -6 4429.66 232.98
 2 0 -6 4487.45 234.38
 2 0 -6 4440.86 234.08
 -1 0 6 -2.6 1.4
 -1 0 6 3 1.6
 -1 0 6 3.3 1.8
 -1 0 6 4.6 2.1
 -1 0 6 3.2 2.2
 -1 0 6 6.3 2.3
 1 0 -6 -0.9 1.7
 1 0 -6 4.4 2.4
 1 0 -6 2.6 2.2
 1 0 -6 7.8 2.3
 1 0 -6 -1.5 1.7
 1 0 -6 1.2 2.4
 1 0 -6 -0.5 2.5
 0 0 6 61.69 6.3
 0 0 6 57.29 5.5
 0 0 6 65.89 3.9
 0 0 6 69.39 5.3
 0 0 6 68.19 4.7
 0 0 6 57.19 5.3
 0 0 6 52.99 5
 0 0 -6 58.39 5.6
 0 0 -6 63.39 5.2
 0 0 -6 66.59 4.6
 0 0 -6 61.69 5
 0 0 -6 54.69 5.3
 0 0 -6 55.69 3.9
 0 0 -6 58.89 6.1
 0 0 -6 55.99 5.7
 1 0 6 -0.9 1.8
 1 0 6 0.2 1
 1 0 6 0.6 2
 1 0 6 0.2 2
 1 0 6 -0.4 1.6
 1 0 6 -1.9 2.6
 1 0 6 0.7 2
 -1 0 -6 -0.2 1.6
 -1 0 -6 0.1 2.3
 -1 0 -6 0 2.1
 -1 0 -6 0.1 1.8
 -1 0 -6 -0.4 1.8
 -1 0 -6 1.4 2.5
 -1 0 -6 2.3 2.6
 2 0 6 1354.16 67.99
 2 0 6 1193.48 67.89
 2 0 6 1228.88 67.59
 2 0 6 1213.68 68.49
 2 0 6 1297.27 67.99
 2 0 6 1271.97 66.09
 2 0 6 1384.06 67.69
 2 0 6 1155.88 67.79
 2 0 6 1270.87 67.79
 -2 0 -6 1312.77 67.89
 -2 0 -6 1326.77 67.69
 -2 0 -6 1178.48 67.99
 -2 0 -6 1323.97 68.39
 -2 0 -6 1325.17 67.09
 -2 0 -6 1287.27 68.09
 -2 0 -6 1244.78 68.09
 3 0 6 -2.9 2.4
 3 0 6 -1.9 2.6
 3 0 6 -2.7 2.3
 3 0 6 -1.5 3.2
 3 0 6 -0.5 2.4
 3 0 6 -3.6 2.8
 3 0 6 0 2.7
 3 0 6 -0.4 1.5
 3 0 6 -1.1 2.5
 -3 0 -6 0.1 2.3
 -3 0 -6 -2.1 2.9
 -3 0 -6 1.7 3.2
 -3 0 -6 0.6 0.7
 -3 0 -6 3.7 3.6
 -3 0 -6 -4.1 2.4
 -3 0 -6 -1.7 1.9
 -3 0 -6 0.2 2.5
 4 0 6 2654.33 153.58
 4 0 6 3036.8 152.78
 4 0 6 2954.8 153.58
 4 0 6 2971.8 154.88
 4 0 6 2988.3 154.48
 4 0 6 3021.2 152.28
 4 0 6 2855.21 153.88
 4 0 6 2746.93 154.38
 4 0 6 3123.09 155.18
 -4 0 -6 3054.69 154.08
 -4 0 -6 3079.59 153.08
 -4 0 -6 2964.3 153.08
 -4 0 -6 3089.19 155.08
 -4 0 -6 2989 153.98
 -4 0 -6 2609.64 154.58
 -4 0 -6 2777.62 155.08
 -4 0 -6 2738.93 155.58
 -4 0 -6 3126.79 153.68
 5 0 6 2.1 1.9
 5 0 6 1.1 3.7
 5 0 6 -3.8 2.8
 5 0 6 -1.2 2.4
 5 0 6 -2.3 2.2
 5 0 6 -2.6 3.7
 5 0 6 -0.1 1.9
 5 0 6 -8.5 3
 5 0 6 0.7 2.7
 5 0 6 -0.6 2.9
 5 0 6 -1.5 1.5
 -5 0 -6 -3.2 3.9
 -5 0 -6 -5.5 3.7
 -5 0 -6 1.3 4.4
 -5 0 -6 -4.5 4.4
 -5 0 -6 -1.6 2.3
 -5 0 -6 -1.2 1.6
 -5 0 -6 -0.9 2
 -5 0 -6 3.1 2.1
 -5 0 -6 -0.1 2.8
 -5 0 -6 0.5 4
 6 0 6 2.9 4.4
 6 0 6 2.6 2.7
 6 0 6 5.4 2.3
 6 0 6 7.6 4.4
 6 0 6 3.4 3.5
 6 0 6 2.9 2.9
 6 0 6 7.4 4.6
 6 0 6 7.4 2.6
 6 0 6 7.7 2.9
 6 0 6 6.9 4
 6 0 6 4.8 2.8
 -6 0 -6 6.6 5.5
 -6 0 -6 13.4 3.2
 -6 0 -6 5.5 5.5
 -6 0 -6 2.6 5.4
 -6 0 -6 11.1 2.8
 -6 0 -6 17.6 6.7
 -6 0 -6 15.5 5.8
 -6 0 -6 6.9 2.9
 7 0 6 13.3 4.9
 7 0 6 0.9 3.7
 7 0 6 5.4 4.6
 7 0 6 1.7 2.8
 7 0 6 4.9 3.5
 7 0 6 6 5.4
 7 0 6 -1.1 3.7
 7 0 6 11.7 5.9
 7 0 6 1.9 3.1
 7 0 6 6.9 3.3
 7 0 6 6.2 4.3
 7 0 6 9.9 5
 -7 0 -6 18.7 6.9
 -7 0 -6 19.9 7.3
 -7 0 -6 19.5 7.8
 -7 0 -6 6 2.8
 -7 0 -6 5.4 5.8
 -7 0 -6 4.8 2.7
 -7 0 -6 12.2 7.6
 8 0 6 266.27 19.9
 8 0 6 274.47 18.7
 8 0 6 243.68 17.9
 8 0 6 254.07 17.4
 8 0 6 248.28 17.3
 8 0 6 313.47 17.2
 8 0 6 256.77 17.2
 8 0 6 270.37 18.7
 8 0 6 276.67 17.3
 8 0 6 274.67 21.1
 -8 0 -6 275.37 16.1
 -8 0 -6 283.57 21.4
 -8 0 -6 308.07 23.9
 -8 0 -6 283.27 23.9
 -8 0 -6 227.58 16
 -8 0 -6 344.17 23.2
 -8 0 -6 309.17 22
 9 0 6 -3 2.5
 9 0 6 1.2 3.3
 9 0 6 -1.2 5
 9 0 6 3.9 3.1
 9 0 6 -4 4.5
 9 0 6 1.5 3.2
 9 0 6 4.9 4.2
 9 0 6 -1.5 3.5
 9 0 6 -0.1 3
 -9 0 -6 -5.9 7.2
 -9 0 -6 -1.5 6.7
 -9 0 -6 4.2 7.4
 -9 0 -6 4.6 8.5
 -9 0 -6 2.1 1.7
 -9 0 -6 -0.6 6.1
 -9 0 -6 -0.4 1.4
 10 0 6 25.4 6.4
 10 0 6 30.9 5.2
 10 0 6 29.2 5.4
 10 0 6 34.1 5.3
 10 0 6 32.5 6.4
 10 0 6 33.3 5.3
 10 0 6 31.4 6.2
 10 0 6 40 6.2
 10 0 6 28.8 8.6
 -10 0 -6 28.5 10.1
 -10 0 -6 39.3 9.4
 -10 0 -6 28.7 11.4
 -10 0 -6 44.4 10.7
 -10 0 -6 53.39 11.5
 11 0 6 5 3.5
 11 0 6 0.9 3.2
 11 0 6 0.5 2.9
 11 0 6 0.8 4.6
 11 0 6 1.7 4
 11 0 6 -1.5 3.1
 11 0 6 4.1 3.4
 -11 0 -6 -8.1 7.5
 -11 0 -6 2.1 7.4
 -11 0 -6 1.5 6.5
 -11 0 -6 4.6 8.9
 12 0 6 51.69 9.4
 12 0 6 64.29 6.4
 12 0 6 60.39 7
 12 0 6 56.29 7.2
 12 0 6 51.59 7.1
 12 0 6 46.6 6.5
 -12 0 -6 51.89 16.1
 -12 0 -6 50.89 13.2
 -12 0 -6 58.39 11.6
 -12 0 -6 61.39 14.8
 13 0 6 -1.6 3.5
 13 0 6 0.1 4.8
 13 0 6 2.2 2.4
 13 0 6 -4 2.6
 13 0 6 -2 3.3
 -13 0 -6 0.1 8.4
 -13 0 -6 -3.5 8.4
 -13 0 -6 6.9 10.3
 14 0 6 51.29 7
 -14 0 -6 34.9 13
 -14 0 -6 36.4 12.7
 15 0 6 3.1 5.9
 -15 0 -6 -20.8 9.6
 -15 0 -6 5.4 11.3
 15 0 -7 24.7 9
 14 0 -7 1.1 4.7
 14 0 -7 -9.5 6.5
 13 0 -7 175.08 10.6
 13 0 -7 181.68 14.5
 13 0 -7 185.68 11.1
 13 0 -7 152.08 22
 -12 0 7 -8.3 7.2
 12 0 -7 -2.9 4.4
 12 0 -7 4.3 1.8
 12 0 -7 -4 5.9
 12 0 -7 1.4 2.4
 -11 0 7 11.2 8
 -11 0 7 12.5 8.7
 11 0 -7 23.4 3.6
 11 0 -7 24.8 8.1
 11 0 -7 16.4 2.7
 11 0 -7 22.9 5.9
 -10 0 7 8.7 6.1
 -10 0 7 14 8.2
 -10 0 7 8.2 6.8
 -10 0 7 10.4 6.9
 -10 0 7 5.2 6.6
 10 0 -7 0.3 5.6
 10 0 -7 5.2 4.1
 10 0 -7 1.2 2.5
 10 0 -7 2.9 6.4
 10 0 -7 13.7 5.6
 10 0 -7 -3 5.5
 10 0 -7 1.6 2
 -9 0 7 491.45 32.5
 -9 0 7 498.35 30.8
 -9 0 7 420.86 32
 -9 0 7 471.45 31.4
 -9 0 7 462.55 31.6
 9 0 -7 488.45 34.3
 9 0 -7 494.85 25.9
 9 0 -7 522.35 29
 9 0 -7 489.85 26.5
 9 0 -7 488.45 31.1
 9 0 -7 495.15 32
 9 0 -7 467.15 33.4
 9 0 -7 430.06 29.1
 9 0 -7 482.15 30.1
 9 0 -7 479.75 27
 9 0 -7 483.15 25.9
 9 0 -7 495.35 30.5
 9 0 -7 519.25 30.9
 9 0 -7 487.15 34.1
 -8 0 7 -0.7 5.1
 -8 0 7 -4.8 5.4
 -8 0 7 -0.7 5.8
 -8 0 7 1.5 5.2
 -8 0 7 0.2 4.9
 8 0 -7 0.1 1.8
 8 0 -7 1.3 2.3
 8 0 -7 -2.2 2
 8 0 -7 2.1 3.4
 8 0 -7 2.8 5.8
 8 0 -7 2 4.5
 8 0 -7 5.4 4.5
 8 0 -7 1.1 5.1
 8 0 -7 3.9 4.5
 8 0 -7 0.3 1.8
 8 0 -7 -3.2 3.9
 8 0 -7 5.9 4.5
 8 0 -7 -7.1 4.3
 8 0 -7 0.4 5.7
 8 0 -7 0.8 4
 -7 0 7 40.8 7.9
 -7 0 7 47 8.2
 -7 0 7 46.6 7.2
 -7 0 7 34.4 7.6
 -7 0 7 35.8 8
 -7 0 7 41.9 7.4
 7 0 -7 37.2 8.3
 7 0 -7 44.2 6.2
 7 0 -7 39.8 6.7
 7 0 -7 28.9 8.2
 7 0 -7 41.3 8.7
 7 0 -7 44.1 5.9
 7 0 -7 47.7 7.2
 7 0 -7 46 7.2
 7 0 -7 49.9 7.3
 7 0 -7 37.8 4.5
 7 0 -7 56.89 8.3
 7 0 -7 44.3 4.9
 7 0 -7 41.9 4.5
 7 0 -7 38.2 4
 7 0 -7 50.09 7
 7 0 -7 41 7.8
 -6 0 7 0.2 1.1
 -6 0 7 0.8 4.7
 -6 0 7 3.5 3.5
 -6 0 7 -5.7 3.9
 -6 0 7 0.2 1.3
 -6 0 7 1.1 4.6
 -6 0 7 -1.9 3.7
 6 0 -7 -2.1 3.7
 6 0 -7 -6 2.9
 6 0 -7 3.5 3.9
 6 0 -7 3.9 3.6
 6 0 -7 -0.4 3.4
 6 0 -7 0.4 4.6
 6 0 -7 -5 2.6
 6 0 -7 2.1 2.2
 6 0 -7 6 3.6
 6 0 -7 0.2 2.7
 6 0 -7 -1.8 2
 6 0 -7 0.9 2.1
 6 0 -7 5.3 5.1
 6 0 -7 -3.2 1.5
 6 0 -7 -1.5 4.5
 -5 0 7 3688.63 208.88
 -5 0 7 4032 209.08
 -5 0 7 4065.89 209.48
 -5 0 7 3426.56 209.78
 -5 0 7 3752.92 210.18
 -5 0 7 4015.8 209.98
 -5 0 7 3948.2 210.18
 -5 0 7 4041.7 207.78
 5 0 -7 3960.7 207.88
 5 0 -7 4096.79 208.18
 5 0 -7 4507.05 209.88
 5 0 -7 3980.5 211.48
 5 0 -7 4077.39 209.78
 5 0 -7 3925.11 208.88
 5 0 -7 4244.58 209.48
 5 0 -7 3968 208.68
 5 0 -7 3926.01 211.18
 5 0 -7 4127.59 211.88
 5 0 -7 4212.58 209.48
 5 0 -7 3870.01 210.08
 5 0 -7 3981.4 208.58
 5 0 -7 4152.58 208.78
 5 0 -7 3982.6 210.28
 -4 0 7 -0.5 1.9
 -4 0 7 2.6 3.5
 -4 0 7 1.9 2.6
 -4 0 7 2.2 3.1
 -4 0 7 1.5 2.4
 -4 0 7 2.9 3.5
 -4 0 7 1.2 2.4
 -4 0 7 3 3.7
 -4 0 7 3.1 2.8
 4 0 -7 0.5 3.5
 4 0 -7 2.5 2.8
 4 0 -7 0.9 2.4
 4 0 -7 -0.4 1.9
 4 0 -7 4.5 2.4
 4 0 -7 -0.6 2.8
 4 0 -7 0.3 2.5
 4 0 -7 0.5 2.4
 4 0 -7 -0.9 2.7
 4 0 -7 2.8 2.5
 4 0 -7 -6.2 3.8
 -3 0 7 159.78 9.6
 -3 0 7 154.28 10
 -3 0 7 169.68 10.8
 -3 0 7 171.38 11.4
 -3 0 7 177.88 9.7
 -3 0 7 160.78 10.5
 -3 0 7 153.28 11.2
 -3 0 7 184.38 11.6
 -3 0 7 151.38 11.2
 -3 0 7 153.68 11.7
 3 0 -7 174.98 10.8
 3 0 -7 162.58 10.6
 3 0 -7 139.59 10.7
 3 0 -7 160.48 11.5
 3 0 -7 160.48 9.7
 3 0 -7 150.28 10
 3 0 -7 140.29 10.1
 3 0 -7 160.38 11.4
 3 0 -7 165.38 12.7
 3 0 -7 179.88 11
 -2 0 7 0.7 1.4
 -2 0 7 1.1 1.9
 -2 0 7 2.6 2.5
 -2 0 7 0.7 2
 -2 0 7 0.8 1.8
 -2 0 7 1 2.7
 -2 0 7 0.4 2.9
 -2 0 7 -1.1 2.7
 -2 0 7 -1 2.1
 2 0 -7 0.1 0.7
 2 0 -7 2.5 2.3
 2 0 -7 -0.9 2.5
 2 0 -7 -1.1 2.6
 2 0 -7 1.3 2
 2 0 -7 -1.7 2.3
 2 0 -7 3.5 3.4
 2 0 -7 2.7 2.6
 -1 0 7 27.3 4.3
 -1 0 7 35.2 3.9
 -1 0 7 33.3 3.6
 -1 0 7 24.1 5
 -1 0 7 25.1 3.6
 -1 0 7 39.6 4.4
 -1 0 7 28.2 3.9
 1 0 -7 44.6 4.2
 1 0 -7 23.3 3.8
 1 0 -7 32.2 4.2
 1 0 -7 23.2 4.3
 1 0 -7 25.6 4.6
 1 0 -7 26.8 4.3
 1 0 -7 38.9 5
 0 0 7 2.3 2.3
 0 0 7 4.1 1.1
 0 0 7 3.3 2.1
 0 0 7 4.1 3.1
 0 0 7 7 2.6
 0 0 7 3.3 1.7
 0 0 7 3.9 2.7
 0 0 -7 2.9 1.7
 0 0 -7 3.6 2.6
 0 0 -7 0.6 2.9
 0 0 -7 4.4 2.2
 0 0 -7 4.2 1.3
 0 0 -7 4 2.2
 0 0 -7 2.2 2.7
 0 0 -7 4.5 2.7
 1 0 7 2425.16 123.69
 1 0 7 2253.17 123.39
 1 0 7 2394.96 123.59
 1 0 7 2400.06 122.19
 1 0 7 2351.96 122.69
 1 0 7 2359.36 124.59
 1 0 7 2274.77 123.79
 -1 0 -7 2247.48 122.99
 -1 0 -7 2470.05 124.49
 -1 0 -7 2476.55 124.19
 -1 0 -7 2016.2 123.49
 -1 0 -7 2320.37 122.79
 -1 0 -7 2507.45 123.59
 -1 0 -7 2326.87 123.99
 -1 0 -7 2449.75 122.49
 2 0 7 -4.9 2
 2 0 7 -0.6 2.4
 2 0 7 -0.3 0.8
 2 0 7 -0.5 2.1
 2 0 7 -1.9 2.4
 2 0 7 -2.9 2.5
 2 0 7 -1.7 2.3
 2 0 7 -3.6 3.2
 -2 0 -7 -1.3 2.6
 -2 0 -7 -2.7 2.8
 -2 0 -7 3.2 2.8
 -2 0 -7 0 2.6
 -2 0 -7 2.4 2.7
 -2 0 -7 1.2 1.8
 -2 0 -7 -2.4 2.1
 3 0 7 197.18 13.3
 3 0 7 171.08 12.6
 3 0 7 182.38 13.1
 3 0 7 178.48 13.8
 3 0 7 176.28 12.6
 3 0 7 176.58 12.9
 3 0 7 191.08 12.8
 3 0 7 222.08 13.6
 -3 0 -7 184.08 13.2
 -3 0 -7 211.98 12.5
 -3 0 -7 216.58 13.6
 -3 0 -7 185.78 13.7
 -3 0 -7 200.08 13.3
 -3 0 -7 204.48 11.9
 -3 0 -7 191.78 13.2
 4 0 7 0.7 1.7
 4 0 7 0.1 2.5
 4 0 7 1.7 2.9
 4 0 7 1.5 3.6
 4 0 7 0.8 1.1
 4 0 7 -1.3 3.4
 4 0 7 0.2 3.2
 4 0 7 -1.3 2.5
 4 0 7 1.7 3.8
 -4 0 -7 1.1 3.7
 -4 0 -7 -0.3 3.8
 -4 0 -7 -0.3 2.9
 -4 0 -7 4.9 4
 -4 0 -7 4.6 3.4
 -4 0 -7 0.9 4.9
 -4 0 -7 0.6 2.7
 -4 0 -7 1.2 2.4
 -4 0 -7 4.9 2
 5 0 7 154.08 11.4
 5 0 7 147.99 10.2
 5 0 7 120.09 11.1
 5 0 7 140.39 11.8
 5 0 7 144.69 11.3
 5 0 7 136.49 11.6
 5 0 7 138.99 10.5
 5 0 7 140.39 8.5
 5 0 7 139.09 9
 -5 0 -7 120.49 12
 -5 0 -7 135.29 10.4
 -5 0 -7 158.28 12.5
 -5 0 -7 139.69 9.8
 -5 0 -7 134.69 9.3
 -5 0 -7 155.28 10.5
 -5 0 -7 110.09 11.4
 -5 0 -7 133.59 9.2
 -5 0 -7 118.29 12.9
 6 0 7 2.1 3.9
 6 0 7 -2.1 2.4
 6 0 7 2.7 4.3
 6 0 7 2.2 2
 6 0 7 -1.7 1.9
 6 0 7 5.1 4.5
 6 0 7 -2.8 3.6
 6 0 7 -2.7 2.8
 6 0 7 0.2 2.7
 6 0 7 11.2 4.4
 -6 0 -7 -2.1 2.5
 -6 0 -7 -2 2.6
 -6 0 -7 -0.9 1.9
 -6 0 -7 -5.1 4.1
 -6 0 -7 -2.1 4.3
 -6 0 -7 -2.7 1.8
 -6 0 -7 0.6 4.6
 -6 0 -7 -1.3 1.5
 -6 0 -7 3.2 5.7
 7 0 7 12.8 5.9
 7 0 7 7.4 5.6
 7 0 7 3.7 2.7
 7 0 7 8 4.8
 7 0 7 4.2 2.9
 7 0 7 12.1 5.3
 7 0 7 2.6 3.3
 7 0 7 2.5 3.5
 7 0 7 8.2 4.8
 7 0 7 2.6 3.5
 7 0 7 5.4 3.9
 -7 0 -7 4.8 3.2
 -7 0 -7 0.5 7.3
 -7 0 -7 1.8 5.5
 -7 0 -7 11.4 6.3
 -7 0 -7 6.5 6.4
 -7 0 -7 4.9 3.1
 -7 0 -7 8.1 7.9
 -7 0 -7 3.6 2.7
 8 0 7 1.6 3.4
 8 0 7 -0.4 2.9
 8 0 7 0.5 2
 8 0 7 1.6 4.4
 8 0 7 2.7 2.9
 8 0 7 -3.9 3.4
 8 0 7 0.5 3.5
 8 0 7 3.1 5.7
 8 0 7 -4.7 3.2
 8 0 7 -1.5 3.5
 8 0 7 -0.6 3.2
 8 0 7 2.1 3.6
 8 0 7 -4.8 4.4
 -8 0 -7 0.9 8.2
 -8 0 -7 2.4 2.8
 -8 0 -7 13.4 8.7
 -8 0 -7 6.4 6.7
 -8 0 -7 2.5 7.7
 -8 0 -7 4.1 6.4
 9 0 7 142.89 10.8
 9 0 7 133.69 11.4
 9 0 7 143.49 11.4
 9 0 7 148.19 12.5
 9 0 7 156.58 11.4
 9 0 7 143.69 12.7
 9 0 7 148.09 13.7
 9 0 7 158.48 11.6
 9 0 7 151.18 10.6
 -9 0 -7 145.89 18.5
 -9 0 -7 135.39 9.5
 -9 0 -7 144.69 16.1
 -9 0 -7 131.29 15
 -9 0 -7 172.98 20.3
 -9 0 -7 147.99 16.5
 -9 0 -7 138.39 9.7
 10 0 7 1.7 2.9
 10 0 7 0.4 4
 10 0 7 1 3.2
 10 0 7 1.8 4
 10 0 7 -0.9 3.1
 10 0 7 3.8 4.6
 10 0 7 3.2 3.7
 10 0 7 1.9 3.1
 -10 0 -7 -5.7 7.7
 -10 0 -7 3.7 7.8
 -10 0 -7 -0.3 7
 -10 0 -7 -13.4 6.8
 -10 0 -7 -3.2 5.8
 11 0 7 169.88 12.5
 11 0 7 146.99 13.7
 11 0 7 165.58 13.5
 11 0 7 160.58 11.5
 11 0 7 158.78 12.2
 11 0 7 124.99 11.5
 -11 0 -7 141.49 17.1
 -11 0 -7 158.18 20.5
 -11 0 -7 164.88 21.6
 -11 0 -7 183.58 21.1
 12 0 7 -2.2 3.5
 12 0 7 -0.2 3
 12 0 7 -0.8 3.8
 12 0 7 -0.1 3.9
 12 0 7 0.6 3.3
 12 0 7 -0.4 4.2
 -12 0 -7 -8 7.9
 -12 0 -7 4.9 7.5
 -12 0 -7 -1 8.8
 13 0 7 5.5 3.2
 13 0 7 5 3.6
 13 0 7 7.1 4.9
 13 0 7 7.5 3.4
 13 0 7 11.7 4.9
 -13 0 -7 9.2 8.3
 -13 0 -7 17.9 11.7
 -13 0 -7 -1.1 9.7
 -13 0 -7 -1.5 10
 14 0 7 6.9 3.9
 14 0 7 0 2.4
 14 0 7 0.7 2.7
 14 0 7 7.2 2.3
 -14 0 -7 -4.4 8.8
 -14 0 -7 17 12.3
 -15 0 -7 16.6 12.9
 14 0 -8 55.69 11.6
 14 0 -8 66.09 8.5
 13 0 -8 -3 6.8
 13 0 -8 8.6 2.7
 13 0 -8 -3.1 4.2
 13 0 -8 0.7 2.4
 -12 0 8 -5.1 7.8
 -12 0 8 9.7 8.5
 12 0 -8 -5.7 4.1
 12 0 -8 0.8 3.2
 12 0 -8 7.9 7.2
 12 0 -8 -0.6 1.8
 -11 0 8 6.3 8.1
 -11 0 8 1.2 7.1
 -11 0 8 -1.3 7
 11 0 -8 2.7 4.2
 11 0 -8 -0.4 6.2
 11 0 -8 4.5 3.1
 -10 0 8 -4.1 6.3
 -10 0 8 6.8 5.9
 -10 0 8 2.8 7.2
 -10 0 8 0.8 6.9
 -10 0 8 2.5 6.4
 10 0 -8 2.4 4.1
 10 0 -8 6.1 8
 10 0 -8 -1.5 5
 10 0 -8 3.1 2.1
 10 0 -8 0.8 2.8
 10 0 -8 10.8 6.1
 10 0 -8 -9 5.7
 -9 0 8 11 5.8
 -9 0 8 -0.1 6.5
 -9 0 8 -7.1 5.6
 -9 0 8 -6.4 6.5
 -9 0 8 -5.5 5.8
 9 0 -8 -1.1 5.6
 9 0 -8 -4.1 4.3
 9 0 -8 -2.1 4
 9 0 -8 0.8 2.5
 9 0 -8 1.8 2
 9 0 -8 0.6 6.5
 9 0 -8 -4.5 3.6
 9 0 -8 -2.1 3.7
 9 0 -8 0.1 4.7
 9 0 -8 2.1 2.2
 9 0 -8 0.8 2.7
 -8 0 8 373.46 24.3
 -8 0 8 381.76 26.1
 -8 0 8 356.76 24.9
 -8 0 8 346.77 25.8
 -8 0 8 362.26 25.3
 8 0 -8 391.96 28
 8 0 -8 358.76 23.7
 8 0 -8 393.66 22.9
 8 0 -8 348.47 24.8
 8 0 -8 364.16 21.4
 8 0 -8 356.66 23.8
 8 0 -8 344.87 24.3
 8 0 -8 376.96 21.7
 8 0 -8 412.66 26.7
 8 0 -8 396.66 27.4
 8 0 -8 338.67 29
 8 0 -8 386.96 25.9
 8 0 -8 369.76 21.1
 8 0 -8 384.26 21.5
 -7 0 8 -7.6 4.4
 -7 0 8 -2.7 5.2
 -7 0 8 -4.8 3.8
 -7 0 8 -3.6 4.4
 -7 0 8 5 5.5
 -7 0 8 -3.4 4.6
 7 0 -8 0.8 4.3
 7 0 -8 -3 2.1
 7 0 -8 -3.4 3.4
 7 0 -8 0.1 2.5
 7 0 -8 -2.2 3.2
 7 0 -8 -10.6 4.4
 7 0 -8 0.4 3.2
 7 0 -8 0.9 1.9
 7 0 -8 -0.2 5.4
 7 0 -8 -3.4 3.6
 7 0 -8 -10.1 3.3
 7 0 -8 -0.2 3.8
 7 0 -8 -5.9 2.2
 7 0 -8 -5.1 5.6
 7 0 -8 -1.1 3.5
 -6 0 8 81.29 10.5
 -6 0 8 75.89 9.3
 -6 0 8 73.69 6.3
 -6 0 8 84.89 9
 -6 0 8 87.89 8.6
 -6 0 8 88.69 6
 -6 0 8 89.69 9.9
 -6 0 8 62.19 9.2
 6 0 -8 92.19 7.7
 6 0 -8 87.19 8.6
 6 0 -8 87.39 8
 6 0 -8 96.99 12
 6 0 -8 102.89 11.1
 6 0 -8 81.59 7.4
 6 0 -8 88.79 8.4
 6 0 -8 77.09 10.9
 6 0 -8 87.49 9.3
 6 0 -8 111.59 9.2
 6 0 -8 82.39 6.6
 6 0 -8 91.19 7.3
 6 0 -8 85.89 9.6
 6 0 -8 84.99 8.5
 6 0 -8 106.99 8.1
 -5 0 8 -2.7 2.6
 -5 0 8 -4.5 3.2
 -5 0 8 3.7 2
 -5 0 8 -0.7 4
 -5 0 8 -2.4 3.1
 -5 0 8 -1.6 3.7
 -5 0 8 0.6 2.8
 5 0 -8 -0.9 2.8
 5 0 -8 -1 2.3
 5 0 -8 3 2.8
 5 0 -8 1.1 2.6
 5 0 -8 -1.5 3.6
 5 0 -8 -1.9 2.3
 5 0 -8 0.6 4.3
 5 0 -8 -1.5 2.3
 5 0 -8 -0.2 4.2
 5 0 -8 -5 3.3
 5 0 -8 -5.3 2.5
 5 0 -8 0.6 2.7
 5 0 -8 -0.4 1.9
 -4 0 8 2117.69 105.39
 -4 0 8 1749.12 105.19
 -4 0 8 1894.01 104.49
 -4 0 8 1941.01 104.29
 -4 0 8 1987.3 104.29
 -4 0 8 2001.9 103.89
 -4 0 8 2088.19 105.19
 -4 0 8 2026.8 103.99
 -4 0 8 1911.31 102.49
 -4 0 8 1669.53 104.79
 4 0 -8 1895.71 103.89
 4 0 -8 2043 104.89
 4 0 -8 1997.7 105.49
 4 0 -8 1902.01 103.69
 4 0 -8 1880.01 104.39
 4 0 -8 2024.6 104.79
 4 0 -8 2119.59 107.09
 4 0 -8 1922.41 103.39
 4 0 -8 2256.37 104.89
 4 0 -8 1978.6 104.19
 4 0 -8 2038.7 104.19
 -3 0 8 -1.2 1.8
 -3 0 8 0.2 3.4
 -3 0 8 2.6 3
 -3 0 8 -1 1.8
 -3 0 8 9.8 3.8
 -3 0 8 -3.8 2
 -3 0 8 4.1 3.4
 -3 0 8 -1.7 1.6
 -3 0 8 3.8 2.6
 -3 0 8 2.9 3.1
 3 0 -8 -2.3 2.8
 3 0 -8 -0.2 2.8
 3 0 -8 -1 2.7
 3 0 -8 -0.2 1.3
 3 0 -8 0.9 2.2
 3 0 -8 -4 3.3
 3 0 -8 2 2.4
 3 0 -8 -1.4 1.6
 3 0 -8 -0.6 2.6
 -2 0 8 2055.89 105.69
 -2 0 8 2074.39 104.19
 -2 0 8 2015.7 104.09
 -2 0 8 2040.5 104.89
 -2 0 8 1891.41 104.89
 -2 0 8 1888.41 104.49
 -2 0 8 2065.99 104.69
 -2 0 8 2256.07 104.69
 2 0 -8 1890.91 105.29
 2 0 -8 1902.11 104.79
 2 0 -8 2004.2 104.89
 2 0 -8 1902.01 104.39
 2 0 -8 1761.52 104.89
 2 0 -8 1956.2 104.49
 2 0 -8 2033.7 105.79
 -1 0 8 3.6 2.9
 -1 0 8 2.3 2
 -1 0 8 -0.8 2.3
 -1 0 8 -3.7 2.5
 -1 0 8 -0.8 2.2
 -1 0 8 1.8 2.5
 -1 0 8 -0.1 3.6
 1 0 -8 -0.1 2.4
 1 0 -8 2.5 2.6
 1 0 -8 -1.5 2.9
 1 0 -8 1.2 3.1
 1 0 -8 0.9 2.9
 1 0 -8 1.3 2.4
 1 0 -8 -2.1 3.2
 0 0 8 180.88 11.3
 0 0 8 166.08 10.4
 0 0 8 182.88 11.9
 0 0 8 177.58 9.5
 0 0 8 163.18 11.2
 0 0 8 174.68 11.4
 0 0 8 179.58 12.8
 0 0 -8 169.28 11.2
 0 0 -8 146.99 11.4
 0 0 -8 148.29 11.7
 0 0 -8 160.48 9.6
 0 0 -8 163.18 10.1
 0 0 -8 151.78 12
 0 0 -8 177.68 10.5
 0 0 -8 172.68 12.1
 0 0 -8 176.18 11.1
 1 0 8 1.9 1.9
 1 0 8 -1.9 2.6
 1 0 8 0.8 4.2
 1 0 8 3.9 2.7
 1 0 8 2 2.7
 1 0 8 -1.2 2.6
 1 0 8 -1.2 1.3
 -1 0 -8 -2.2 2.3
 -1 0 -8 0.3 3.3
 -1 0 -8 -1.1 3.3
 -1 0 -8 -1 1.9
 -1 0 -8 0.8 1.6
 -1 0 -8 2.5 2.2
 -1 0 -8 2.5 3.4
 -1 0 -8 1.8 3
 2 0 8 3181.48 163.98
 2 0 8 2901.11 164.58
 2 0 8 3245.78 162.38
 2 0 8 3065.89 165.48
 2 0 8 3121.09 164.58
 2 0 8 3081.09 164.58
 2 0 8 3218.68 163.88
 2 0 8 2997.2 164.18
 -2 0 -8 2939.31 164.18
 -2 0 -8 3078.39 164.08
 -2 0 -8 3167.68 162.58
 -2 0 -8 3241.08 165.08
 -2 0 -8 3176.18 164.98
 -2 0 -8 3227.68 164.28
 -2 0 -8 3263.97 163.58
 -2 0 -8 3249.77 165.28
 3 0 8 0.1 2.7
 3 0 8 3.2 4.1
 3 0 8 0 2.8
 3 0 8 -0.5 0.6
 3 0 8 0.6 2.9
 3 0 8 3 3.4
 3 0 8 -0.5 2.7
 -3 0 -8 1.9 3.7
 -3 0 -8 -0.5 2.4
 -3 0 -8 4.3 2.3
 -3 0 -8 2.7 3.8
 -3 0 -8 3.1 3.5
 -3 0 -8 -0.3 3.3
 4 0 8 3 3.1
 4 0 8 7.4 3.3
 4 0 8 4.8 3.6
 4 0 8 6.9 4.3
 4 0 8 8.5 1.2
 4 0 8 4.8 3.7
 4 0 8 4.3 3.9
 4 0 8 2.8 3.2
 -4 0 -8 12.3 3.9
 -4 0 -8 6.8 4.2
 -4 0 -8 0.9 4.1
 -4 0 -8 5.6 3.4
 -4 0 -8 10 4.3
 -4 0 -8 3.9 2.3
 -4 0 -8 10.9 4.1
 -4 0 -8 8.2 3.1
 -4 0 -8 3.8 4.7
 5 0 8 -0.1 3.5
 5 0 8 -1.7 3.3
 5 0 8 0.7 3.6
 5 0 8 1.2 4
 5 0 8 0.5 3.4
 5 0 8 3 2.8
 5 0 8 0.7 2.9
 5 0 8 2.5 1.4
 5 0 8 -1.1 1.8
 -5 0 -8 -1.4 1.8
 -5 0 -8 -1.8 2.7
 -5 0 -8 -0.7 4.2
 -5 0 -8 -4 2.7
 -5 0 -8 3.4 3.1
 -5 0 -8 3.7 2.5
 -5 0 -8 2 4.8
 -5 0 -8 -0.4 4
 -5 0 -8 3.8 4.5
 6 0 8 114.29 11.4
 6 0 8 153.38 9.6
 6 0 8 148.59 8.9
 6 0 8 135.49 11.8
 6 0 8 140.09 12
 6 0 8 154.48 11.1
 6 0 8 132.69 12.3
 6 0 8 150.48 11.1
 6 0 8 136.79 10.9
 6 0 8 132.89 12.5
 6 0 8 141.29 12.5
 -6 0 -8 137.49 9.9
 -6 0 -8 126.09 13.1
 -6 0 -8 137.89 13.2
 -6 0 -8 132.39 14.9
 -6 0 -8 142.79 11
 -6 0 -8 150.58 10.9
 -6 0 -8 144.59 9.4
 -6 0 -8 130.29 14.5
 -6 0 -8 108.99 12.5
 -6 0 -8 150.88 10
 7 0 8 2.5 4.8
 7 0 8 -4.7 4.7
 7 0 8 0.3 2.6
 7 0 8 0.9 2.2
 7 0 8 2 3.8
 7 0 8 -1.4 3.4
 7 0 8 5.3 3.4
 7 0 8 -4.6 4.4
 7 0 8 -0.8 4.5
 7 0 8 -6 4.1
 7 0 8 4 4.7
 7 0 8 -7.5 3
 -7 0 -8 -7.6 6.9
 -7 0 -8 -1.3 2.5
 -7 0 -8 -1.9 6.4
 -7 0 -8 -5.3 5.6
 -7 0 -8 -3.2 5.8
 -7 0 -8 -6.1 2.7
 -7 0 -8 4.1 3.3
 -7 0 -8 -5.8 7.2
 8 0 8 212.48 14.4
 8 0 8 165.18 16.4
 8 0 8 206.38 14.4
 8 0 8 199.68 12.9
 8 0 8 190.88 15.5
 8 0 8 195.38 16
 8 0 8 211.48 13
 8 0 8 208.78 17.2
 8 0 8 213.28 16.5
 8 0 8 186.08 16
 8 0 8 183.78 14.5
 8 0 8 190.68 17.3
 8 0 8 181.58 14.1
 -8 0 -8 191.58 13.4
 -8 0 -8 203.28 13.3
 -8 0 -8 199.38 18
 -8 0 -8 182.48 13.5
 -8 0 -8 180.38 18.4
 -8 0 -8 217.08 20.4
 -8 0 -8 202.38 20.4
 9 0 8 3.1 4.9
 9 0 8 1.8 3.2
 9 0 8 -0.8 3.3
 9 0 8 1.5 2.8
 9 0 8 -2.2 3.6
 9 0 8 1.5 3.6
 9 0 8 1.4 4.3
 9 0 8 4 3.8
 9 0 8 4 5.3
 -9 0 -8 -13.1 7.4
 -9 0 -8 1.3 2.6
 -9 0 -8 3.5 2.5
 -9 0 -8 -5 5.8
 -9 0 -8 -4.7 8
 -9 0 -8 -4.8 6.1
 -9 0 -8 7.2 7.6
 10 0 8 464.15 27.4
 10 0 8 433.36 29.4
 10 0 8 481.15 29.1
 10 0 8 420.66 27.2
 10 0 8 434.86 28.3
 10 0 8 451.95 26.6
 10 0 8 450.75 25.9
 -10 0 -8 459.55 33.1
 -10 0 -8 445.56 31.4
 -10 0 -8 473.15 32.7
 -10 0 -8 461.45 35.1
 -10 0 -8 456.05 34.4
 -10 0 -8 438.56 24.8
 -10 0 -8 443.46 24.9
 11 0 8 4.4 3
 11 0 8 1.5 4
 11 0 8 0.6 3.6
 11 0 8 1.5 4.6
 11 0 8 -5.7 5.4
 11 0 8 0.7 3.5
 -11 0 -8 -3.8 9
 -11 0 -8 0.9 6.4
 -11 0 -8 5.2 10
 12 0 8 40.5 6.6
 12 0 8 35.8 7.2
 12 0 8 50.39 7.1
 12 0 8 37.4 5.1
 12 0 8 47.6 8
 12 0 8 55.29 8.8
 -12 0 -8 41 13.6
 -12 0 -8 53.69 11.5
 -12 0 -8 52.59 14.1
 -12 0 -8 29.4 12.2
 13 0 8 -0.5 4.1
 13 0 8 1.8 3.2
 13 0 8 4.4 2.8
 13 0 8 0.7 4
 -13 0 -8 -8.7 9.3
 -13 0 -8 -7.9 6.5
 -13 0 -8 4.4 11.4
 -13 0 -8 4.5 9.2
 14 0 8 22.8 5.1
 14 0 8 21.8 3.9
 14 0 8 20.6 4.2
 -14 0 -8 13.4 12.2
 -14 0 -8 8.1 9.7
 14 0 -9 21.5 8.6
 14 0 -9 -5.2 3.8
 13 0 -9 17 8.9
 13 0 -9 20.5 4.1
 13 0 -9 12.6 5.1
 -12 0 9 4.5 7.7
 -12 0 9 -8.4 7.1
 12 0 -9 -2.6 4
 12 0 -9 5.2 2.3
 12 0 -9 3.4 3.6
 12 0 -9 5.8 7.1
 -11 0 9 815.72 54.79
 -11 0 9 800.52 55.79
 -11 0 9 875.71 54.89
 11 0 -9 1042.5 56.89
 11 0 -9 946.71 50.29
 11 0 -9 908.91 49.3
 11 0 -9 986.8 51.59
 -10 0 9 -2.4 6.8
 -10 0 9 1 5.3
 -10 0 9 1 7.2
 -10 0 9 -5.6 6.2
 -10 0 9 2.5 7.2
 10 0 -9 -2.5 4.2
 10 0 -9 -1.4 1.5
 10 0 -9 0.5 4.2
 10 0 -9 0.4 1.7
 10 0 -9 -10.2 5.5
 10 0 -9 -1.5 2
 10 0 -9 1 3.1
 10 0 -9 -0.1 3.9
 -9 0 9 96.69 13.5
 -9 0 9 67.49 11.9
 -9 0 9 87.39 12
 -9 0 9 70.19 10
 -9 0 9 77.19 11.9
 9 0 -9 68.79 9.6
 9 0 -9 71.39 6.3
 9 0 -9 85.79 13.7
 9 0 -9 73.99 6.5
 9 0 -9 66.39 9.2
 9 0 -9 68.29 11.3
 9 0 -9 72.89 6.3
 9 0 -9 77.49 9.1
 9 0 -9 67.99 7.2
 -8 0 9 -8.4 5.8
 -8 0 9 -4.5 5
 -8 0 9 -4.5 5.2
 -8 0 9 0.7 5.4
 -8 0 9 1.7 4.7
 8 0 -9 4.5 3.2
 8 0 -9 -2.3 4.8
 8 0 -9 -3.3 5.5
 8 0 -9 -1.2 5.7
 8 0 -9 -2 3.9
 8 0 -9 -1.7 3.5
 8 0 -9 -2.1 3.8
 8 0 -9 -1.8 2.5
 8 0 -9 2.5 2.7
 8 0 -9 2.6 3.9
 8 0 -9 -6.3 4.3
 8 0 -9 0.2 4
 -7 0 9 93.59 11.7
 -7 0 9 102.59 12.3
 -7 0 9 76.99 10.9
 -7 0 9 84.49 9.4
 -7 0 9 90.79 10.3
 -7 0 9 89.79 5.7
 -7 0 9 82.19 5.8
 -7 0 9 100.59 12.4
 7 0 -9 123.79 13.5
 7 0 -9 89.59 8.1
 7 0 -9 67.89 12.6
 7 0 -9 86.09 7.2
 7 0 -9 95.49 8.3
 7 0 -9 93.39 8.4
 7 0 -9 106.09 9.7
 7 0 -9 81.19 9.9
 7 0 -9 91.49 8
 7 0 -9 90.19 11.3
 7 0 -9 113.19 10
 7 0 -9 89.59 9.6
 7 0 -9 91.99 12.8
 7 0 -9 93.99 8.9
 -6 0 9 -1.2 3.4
 -6 0 9 -2.5 1.8
 -6 0 9 2.3 4.9
 -6 0 9 2 5.5
 -6 0 9 -0.4 2.4
 -6 0 9 0.1 4.5
 -6 0 9 2.8 5
 6 0 -9 1.5 4.6
 6 0 -9 3.1 5.2
 6 0 -9 0.3 2.9
 6 0 -9 3.7 3.8
 6 0 -9 -0.9 4.3
 6 0 -9 -2.5 3
 6 0 -9 -0.8 2.9
 6 0 -9 -0.2 5.1
 6 0 -9 3.1 4.2
 6 0 -9 -2 2.1
 6 0 -9 -0.5 3
 6 0 -9 3.2 3.9
 6 0 -9 -2.7 2.8
 6 0 -9 0.1 3.2
 -5 0 9 34 5.3
 -5 0 9 36.1 5.4
 -5 0 9 27.9 4.8
 -5 0 9 26.1 6.4
 -5 0 9 18.2 5.6
 -5 0 9 39.6 4.6
 -5 0 9 19.9 6
 -5 0 9 31.9 5.4
 5 0 -9 37.1 5.2
 5 0 -9 36.2 6.4
 5 0 -9 40.4 7.6
 5 0 -9 28.5 5
 5 0 -9 31.5 4.4
 5 0 -9 42.5 5.9
 5 0 -9 27 4.9
 5 0 -9 33.9 5.1
 5 0 -9 29 5.7
 5 0 -9 33.2 4.9
 5 0 -9 36.9 7.6
 5 0 -9 27.2 4.1
 -4 0 9 -0.1 2.6
 -4 0 9 -3.4 2.8
 -4 0 9 1.9 3.6
 -4 0 9 -0.1 2.2
 -4 0 9 1.6 3.6
 -4 0 9 2.5 2.7
 -4 0 9 0.8 1.3
 -4 0 9 2.6 1.6
 -4 0 9 3.2 2.4
 -4 0 9 -2 3.6
 -4 0 9 2.6 4
 4 0 -9 -3.3 2.6
 4 0 -9 4.1 3.6
 4 0 -9 0.3 1.8
 4 0 -9 3 2.9
 4 0 -9 0.9 2.2
 4 0 -9 3.8 2.8
 4 0 -9 -2.4 3.9
 4 0 -9 -1.6 2.1
 4 0 -9 1.6 2.8
 -3 0 9 113.79 9.2
 -3 0 9 119.79 9
 -3 0 9 145.89 9.7
 -3 0 9 124.39 8.1
 -3 0 9 114.19 9.9
 -3 0 9 115.69 8.8
 -3 0 9 100.49 9.5
 -3 0 9 113.79 7.9
 -3 0 9 102.89 7.5
 -3 0 9 121.19 9.4
 3 0 -9 112.89 8.5
 3 0 -9 127.99 10
 3 0 -9 89.89 9.2
 3 0 -9 111.39 6.6
 3 0 -9 101.49 10.5
 3 0 -9 110.79 7.5
 3 0 -9 120.09 9
 3 0 -9 99.99 9.4
 3 0 -9 130.19 9.5
 -2 0 9 -0.4 2.3
 -2 0 9 -2.1 2.1
 -2 0 9 -1.7 3.5
 -2 0 9 -0.1 2.2
 -2 0 9 1 2.9
 -2 0 9 0.1 2.9
 -2 0 9 0.7 2.5
 2 0 -9 -0.6 2.5
 2 0 -9 0.4 3.3
 2 0 -9 -1.2 3.1
 2 0 -9 -2 2.9
 2 0 -9 -1.4 2.6
 2 0 -9 -0.3 2.5
 2 0 -9 -3.1 3.4
 -1 0 9 1521.65 80.99
 -1 0 9 1512.35 80.99
 -1 0 9 1457.15 80.49
 -1 0 9 1552.34 81.09
 -1 0 9 1627.34 81.09
 -1 0 9 1695.93 82.99
 -1 0 9 1567.24 81.79
 1 0 -9 1395.76 81.19
 1 0 -9 1547.05 81.19
 1 0 -9 1377.46 81.59
 1 0 -9 1421.36 82.09
 1 0 -9 1475.85 81.89
 1 0 -9 1577.24 81.79
 1 0 -9 1618.94 80.99
 0 0 9 0.1 2.7
 0 0 9 -0.2 2.7
 0 0 9 4.1 2.1
 0 0 9 0.4 3.9
 0 0 9 -1.9 2.7
 0 0 9 -3.1 2.5
 0 0 -9 2.4 1.8
 0 0 -9 -1.8 3.1
 0 0 -9 -0.3 2.9
 0 0 -9 2.5 2.1
 0 0 -9 -0.5 3.6
 0 0 -9 0.8 2.8
 0 0 -9 -3.3 3.4
 0 0 -9 -1.1 2.3
 1 0 9 2593.64 132.99
 1 0 9 2726.13 134.79
 1 0 9 2598.84 134.49
 1 0 9 2595.84 133.19
 1 0 9 2461.85 134.89
 1 0 9 2757.32 136.19
 1 0 9 2322.67 134.19
 -1 0 -9 2430.26 135.39
 -1 0 -9 2566.34 134.39
 -1 0 -9 2422.46 134.99
 -1 0 -9 2650.73 135.39
 -1 0 -9 2525.95 133.79
 -1 0 -9 2522.75 133.39
 -1 0 -9 2564.44 133.39
 2 0 9 1.7 2.8
 2 0 9 5.1 4.6
 2 0 9 1.3 1.2
 2 0 9 1.2 3.1
 2 0 9 0.8 2.5
 2 0 9 0.6 3.1
 -2 0 -9 6.4 3.5
 -2 0 -9 2 3.9
 -2 0 -9 -1.7 2
 -2 0 -9 4.9 3.8
 -2 0 -9 2.6 1.6
 -2 0 -9 0.1 2.6
 -2 0 -9 4.8 2.8
 3 0 9 2447.66 125.49
 3 0 9 2236.98 125.29
 3 0 9 2320.67 125.59
 3 0 9 2388.36 125.19
 3 0 9 2242.68 126.69
 3 0 9 2240.98 125.79
 3 0 9 2435.06 122.59
 3 0 9 2297.47 125.79
 -3 0 -9 2498.85 126.29
 -3 0 -9 2251.57 125.79
 -3 0 -9 2478.25 124.49
 -3 0 -9 2475.95 126.39
 -3 0 -9 2290.17 125.49
 -3 0 -9 2515.75 126.29
 -3 0 -9 2447.26 125.29
 4 0 9 -3.3 2.8
 4 0 9 -5.5 3.4
 4 0 9 -1.3 3.4
 4 0 9 -1.1 3
 4 0 9 2.1 3.2
 4 0 9 -6.1 2.6
 4 0 9 -0.3 3
 -4 0 -9 -5.5 3.2
 -4 0 -9 2.3 3.2
 -4 0 -9 -0.8 2.6
 -4 0 -9 -4 3
 -4 0 -9 0.8 2.9
 -4 0 -9 -2.7 4.1
 -4 0 -9 0.8 2.2
 5 0 9 320.47 20.7
 5 0 9 257.47 20.4
 5 0 9 283.47 19.4
 5 0 9 316.67 16.6
 5 0 9 335.47 19.8
 5 0 9 316.77 20.2
 5 0 9 321.17 20.9
 5 0 9 283.07 20
 -5 0 -9 305.57 19.6
 -5 0 -9 308.97 21.5
 -5 0 -9 317.27 21.2
 -5 0 -9 270.17 22
 -5 0 -9 323.27 20
 -5 0 -9 301.67 20.9
 -5 0 -9 327.57 18.5
 -5 0 -9 321.97 18.9
 -5 0 -9 312.07 20
 6 0 9 -9.5 3.8
 6 0 9 -3.5 3.4
 6 0 9 -2.2 3.1
 6 0 9 -1.4 1.4
 6 0 9 0.5 4
 6 0 9 -2.1 3.3
 6 0 9 -6 2.4
 6 0 9 -1.3 2.1
 6 0 9 -5.2 4.4
 6 0 9 -6.2 3
 -6 0 -9 -5.2 4.9
 -6 0 -9 -3.8 3
 -6 0 -9 -3.2 2.5
 -6 0 -9 -4.3 4.8
 -6 0 -9 -4.5 2.9
 -6 0 -9 -0.5 3.6
 -6 0 -9 6.3 5.7
 -6 0 -9 2.1 2.6
 -6 0 -9 0.1 6.5
 7 0 9 249.97 18.7
 7 0 9 292.27 17.9
 7 0 9 272.17 17.7
 7 0 9 251.87 17.2
 7 0 9 240.28 19.3
 7 0 9 287.17 19.3
 7 0 9 267.57 15.1
 7 0 9 244.78 19
 7 0 9 287.97 18
 7 0 9 272.27 15.9
 7 0 9 250.97 19.5
 7 0 9 253.47 18.7
 -7 0 -9 228.88 20.5
 -7 0 -9 237.78 14.9
 -7 0 -9 235.68 20
 -7 0 -9 275.97 22.9
 -7 0 -9 287.17 20.6
 -7 0 -9 255.77 17.3
 -7 0 -9 254.97 17.5
 -7 0 -9 246.38 22.5
 -7 0 -9 257.57 15.2
 -7 0 -9 232.88 16
 8 0 9 2 2.4
 8 0 9 3.9 2.9
 8 0 9 5.8 4.6
 8 0 9 5.3 5.4
 8 0 9 -1.2 5.4
 8 0 9 4.1 5
 8 0 9 -2 4.2
 8 0 9 5 4.2
 8 0 9 7.8 5.6
 8 0 9 2.5 3.8
 8 0 9 2 4.1
 8 0 9 4.1 3.5
 -8 0 -9 -4.6 2.4
 -8 0 -9 0 8
 -8 0 -9 2 3.1
 -8 0 -9 5.2 8.4
 -8 0 -9 4.8 7.3
 -8 0 -9 -1.7 6
 -8 0 -9 3.5 7.9
 -8 0 -9 -0.8 3.5
 9 0 9 135.29 11.9
 9 0 9 151.98 12.5
 9 0 9 148.79 12.2
 9 0 9 154.18 10.4
 9 0 9 142.69 13.2
 9 0 9 151.38 14
 9 0 9 149.09 10.3
 9 0 9 166.08 12.6
 -9 0 -9 161.48 19.6
 -9 0 -9 132.09 16.3
 -9 0 -9 146.29 19.4
 -9 0 -9 149.59 16.7
 -9 0 -9 126.99 16.5
 -9 0 -9 134.29 10.7
 10 0 9 -2.4 4.8
 10 0 9 -1.7 3.8
 10 0 9 1.5 2.8
 10 0 9 -3.1 3.6
 10 0 9 2.5 3.7
 -10 0 -9 2.7 2.6
 -10 0 -9 4.2 8.2
 -10 0 -9 6.8 9.1
 -10 0 -9 -4.4 8.2
 -10 0 -9 2 7
 -10 0 -9 -1.2 2.2
 -10 0 -9 2.9 9.4
 11 0 9 12.7 3.4
 11 0 9 9.1 4.1
 11 0 9 19.7 5.1
 11 0 9 18.9 5.8
 11 0 9 13.7 6.3
 11 0 9 7.4 4.4
 -11 0 -9 16.5 10.2
 -11 0 -9 11 10.3
 -11 0 -9 13.2 10.6
 -11 0 -9 14.3 8.3
 12 0 9 -6.7 3.2
 12 0 9 5.3 3.6
 12 0 9 -0.8 2.5
 12 0 9 4.2 5.5
 12 0 9 -2.3 3.9
 -12 0 -9 -10.9 9.5
 -12 0 -9 8.5 10.8
 -12 0 -9 -11.8 8.6
 -12 0 -9 5.3 6.8
 13 0 9 217.28 15.8
 13 0 9 238.38 19.5
 13 0 9 228.98 17
 -13 0 -9 195.78 20.2
 -13 0 -9 232.88 27.3
 -13 0 -9 256.67 25.1
 -13 0 -9 234.38 26.3
 14 0 9 -1.5 3.5
 14 0 9 7.3 4.5
 -14 0 -9 -0.3 9.1
 -14 0 -9 -0.3 9.6
 14 0 -10 11.8 8.9
 14 0 -10 4.7 4.5
 -13 0 10 11.4 9.6
 -13 0 10 15.8 8.8
 13 0 -10 7.9 8.4
 13 0 -10 12.9 4
 13 0 -10 -6.5 4
 -12 0 10 172.08 17.5
 -12 0 10 129.29 17.7
 -12 0 10 139.69 19.2
 12 0 -10 152.68 10.3
 12 0 -10 143.29 17.3
 12 0 -10 136.39 11.3
 12 0 -10 147.99 12.5
 -11 0 10 11.4 8.9
 -11 0 10 -1 6.9
 -11 0 10 1.4 7
 11 0 -10 3 3.3
 11 0 -10 4.1 7.7
 11 0 -10 1.9 4.2
 11 0 -10 5.3 2.7
 11 0 -10 -7.2 4.1
 -10 0 10 0.7 5.6
 -10 0 10 1.4 6.8
 -10 0 10 0 6.8
 -10 0 10 -11.7 6.7
 -10 0 10 1.6 7.4
 10 0 -10 0.5 2.4
 10 0 -10 0.1 4
 10 0 -10 -0.6 6.4
 10 0 -10 2.5 2.7
 10 0 -10 7.1 3.9
 10 0 -10 9 4.5
 10 0 -10 -1 2.1
 -9 0 10 -5.9 5.7
 -9 0 10 -10.7 6
 -9 0 10 -1.3 6.8
 -9 0 10 7.9 5.7
 -9 0 10 -1.4 5.9
 9 0 -10 4.9 2.7
 9 0 -10 -2.3 4
 9 0 -10 7.5 6
 9 0 -10 1.9 2.9
 9 0 -10 1.1 3.9
 9 0 -10 -0.6 2.5
 9 0 -10 8.6 4.3
 9 0 -10 3.2 3.5
 -8 0 10 888.01 54.19
 -8 0 10 897.21 55.89
 -8 0 10 898.71 56.39
 -8 0 10 956.6 55.49
 -8 0 10 893.41 56.39
 8 0 -10 1027.5 54.09
 8 0 -10 923.31 58.49
 8 0 -10 963.5 54.79
 8 0 -10 980.7 58.49
 8 0 -10 1000.5 53.39
 8 0 -10 1030 53.59
 8 0 -10 978.8 52.49
 8 0 -10 1049.3 54.99
 8 0 -10 1011.4 53.09
 8 0 -10 941.91 56.49
 -7 0 10 3.6 6.2
 -7 0 10 -2.3 4.5
 -7 0 10 -1.7 5.7
 -7 0 10 0.7 2.2
 -7 0 10 -3.7 5.3
 -7 0 10 0.6 5.5
 -7 0 10 4.3 4.4
 -7 0 10 -0.1 1.7
 7 0 -10 3.9 4.9
 7 0 -10 -4.1 2.9
 7 0 -10 0.1 3.9
 7 0 -10 2.4 1.9
 7 0 -10 -1.9 3.8
 7 0 -10 -0.6 3
 7 0 -10 1 2.5
 7 0 -10 1.1 6
 7 0 -10 4 3.3
 7 0 -10 0.7 5.8
 7 0 -10 -2.8 3.2
 7 0 -10 2.1 3.9
 7 0 -10 0.4 3.4
 -6 0 10 -4.4 4.6
 -6 0 10 9.6 5.7
 -6 0 10 5 2.6
 -6 0 10 -3.9 3.3
 -6 0 10 2 3.4
 -6 0 10 -0.3 4.9
 -6 0 10 1.4 4.1
 -6 0 10 6.3 5.7
 6 0 -10 2.8 2.9
 6 0 -10 3.9 5.8
 6 0 -10 2 2.7
 6 0 -10 0.4 4.2
 6 0 -10 2.1 3.5
 6 0 -10 5.5 3.6
 6 0 -10 3.3 6
 6 0 -10 5.3 4.2
 6 0 -10 5.1 4.4
 6 0 -10 4.1 3.6
 6 0 -10 4.9 3.7
 6 0 -10 1.3 5.2
 6 0 -10 3.3 3.3
 -5 0 10 2.4 4.4
 -5 0 10 2 4.3
 -5 0 10 0.7 2.8
 -5 0 10 -2 4.2
 -5 0 10 -1 2.1
 -5 0 10 1.2 3.5
 -5 0 10 2.6 3.5
 -5 0 10 0.2 4.4
 -5 0 10 3.8 3.6
 5 0 -10 -1.9 2
 5 0 -10 7 3.6
 5 0 -10 2.9 3.6
 5 0 -10 -3.7 2.9
 5 0 -10 3.6 3.3
 5 0 -10 1.6 2.6
 5 0 -10 1.3 4.4
 5 0 -10 -0.4 2.7
 5 0 -10 3.8 4.1
 -4 0 10 5329.17 268.07
 -4 0 10 4671.53 268.37
 -4 0 10 5401.86 267.77
 -4 0 10 5010.4 266.87
 -4 0 10 4500.45 268.67
 -4 0 10 5013.3 266.27
 -4 0 10 5337.97 267.87
 -4 0 10 5266.67 268.77
 -4 0 10 5070.89 266.37
 4 0 -10 5421.36 269.17
 4 0 -10 5260.27 268.87
 4 0 -10 5021 267.57
 4 0 -10 5239.08 266.87
 4 0 -10 5557.14 267.97
 4 0 -10 5276.57 268.27
 4 0 -10 5438.96 270.77
 4 0 -10 4605.54 268.17
 4 0 -10 5041.2 265.97
 -3 0 10 -0.4 1.7
 -3 0 10 8.4 3.6
 -3 0 10 4.1 2.4
 -3 0 10 6.4 4.2
 -3 0 10 -0.2 2.6
 -3 0 10 0.9 2.5
 -3 0 10 -0.2 3.3
 -3 0 10 1.8 3.8
 -3 0 10 3.9 2.9
 -3 0 10 0.7 3.3
 3 0 -10 -2.3 3.3
 3 0 -10 0.9 1.7
 3 0 -10 2.9 3.6
 3 0 -10 -3 3.4
 3 0 -10 -2.6 3.6
 3 0 -10 -1.6 2.9
 3 0 -10 -0.6 2.5
 3 0 -10 0.5 3
 -2 0 10 1765.82 93.39
 -2 0 10 1774.92 91.49
 -2 0 10 1828.62 92.09
 -2 0 10 1667.23 91.59
 -2 0 10 1775.62 91.79
 -2 0 10 1809.12 91.49
 -2 0 10 1664.83 92.09
 2 0 -10 1760.32 93.29
 2 0 -10 1602.14 91.79
 2 0 -10 1604.44 92.39
 2 0 -10 1814.92 92.19
 2 0 -10 1718.43 93.09
 2 0 -10 1735.73 91.89
 2 0 -10 1647.74 92.69
 -1 0 10 -0.4 2.5
 -1 0 10 -1.1 2.3
 -1 0 10 -1 2.2
 -1 0 10 1.9 3
 -1 0 10 -0.1 2.5
 -1 0 10 -3.7 4.1
 -1 0 10 -0.4 2.7
 1 0 -10 3.7 2.8
 1 0 -10 -1 2.4
 1 0 -10 0.2 3.5
 1 0 -10 1.1 3
 1 0 -10 0.2 3.5
 1 0 -10 -0.2 3.5
 1 0 -10 3 3.4
 0 0 10 1534.45 82.29
 0 0 10 1468.55 81.79
 0 0 10 1567.14 83.09
 0 0 10 1675.93 84.09
 0 0 10 1560.04 81.19
 0 0 -10 1576.54 81.89
 0 0 -10 1348.07 82.39
 0 0 -10 1569.24 80.69
 0 0 -10 1324.17 82.09
 0 0 -10 1590.94 83.09
 0 0 -10 1584.54 80.99
 0 0 -10 1604.14 82.19
 0 0 -10 1534.35 83.29
 1 0 10 3.3 3.4
 1 0 10 4.6 2.1
 1 0 10 4.1 3.3
 1 0 10 0.5 3.2
 1 0 10 -0.2 2
 1 0 10 5.1 5
 1 0 10 2.7 3.5
 -1 0 -10 3 4.1
 -1 0 -10 6.3 2.9
 -1 0 -10 2.2 3.9
 -1 0 -10 10.6 3.4
 -1 0 -10 0.9 2.1
 -1 0 -10 4.6 4.2
 -1 0 -10 3.2 2.3
 2 0 10 6490.25 319.57
 2 0 10 6006.9 317.77
 2 0 10 5231.08 317.17
 2 0 10 5791.62 318.07
 2 0 10 6372.26 317.97
 2 0 10 6246.27 316.87
 -2 0 -10 6048.9 318.67
 -2 0 -10 6271.87 318.57
 -2 0 -10 6302.67 317.47
 -2 0 -10 6142.99 316.97
 -2 0 -10 6157.78 317.67
 3 0 10 3.4 4.7
 3 0 10 3.8 3.5
 3 0 10 3 3
 3 0 10 1.4 3.3
 3 0 10 1.3 0.6
 3 0 10 1.4 3.3
 3 0 10 3 3.4
 3 0 10 3.2 3.3
 -3 0 -10 -3.3 3.7
 -3 0 -10 3.1 3.9
 -3 0 -10 1.9 2.5
 -3 0 -10 5.5 3.7
 -3 0 -10 0.1 3.5
 -3 0 -10 0.7 3.6
 4 0 10 1332.07 71.89
 4 0 10 1206.98 74.99
 4 0 10 1353.56 71.69
 4 0 10 1319.77 71.59
 4 0 10 1234.78 71.89
 4 0 10 1266.77 71.69
 4 0 10 1322.27 72.09
 -4 0 -10 1405.56 72.49
 -4 0 -10 1317.37 70.29
 -4 0 -10 1388.26 71.29
 -4 0 -10 1367.26 72.39
 -4 0 -10 1380.86 72.79
 -4 0 -10 1286.97 71.99
 -4 0 -10 1249.38 71.89
 5 0 10 7.9 5.2
 5 0 10 0.9 3.4
 5 0 10 0 3.4
 5 0 10 -0.7 3.4
 5 0 10 -1.3 3.9
 5 0 10 7.8 4.3
 -5 0 -10 5.8 5.6
 -5 0 -10 0.9 5.8
 -5 0 -10 3.9 3.3
 -5 0 -10 0.8 3.4
 -5 0 -10 0.8 3.4
 -5 0 -10 6.4 5.3
 -5 0 -10 1.8 4.1
 -5 0 -10 1.7 2.3
 6 0 10 401.06 25.4
 6 0 10 429.86 26.3
 6 0 10 418.56 21.7
 6 0 10 383.46 25.3
 6 0 10 384.56 26
 6 0 10 433.56 26.8
 6 0 10 378.56 26.9
 6 0 10 425.56 26.2
 6 0 10 423.36 25.4
 -6 0 -10 415.56 25.7
 -6 0 -10 416.76 27.4
 -6 0 -10 425.66 25
 -6 0 -10 418.26 24.1
 -6 0 -10 407.86 23.9
 -6 0 -10 416.66 25.5
 -6 0 -10 379.46 26.8
 -6 0 -10 373.26 27.4
 -6 0 -10 394.46 28.9
 7 0 10 -2.6 4.4
 7 0 10 -10 3
 7 0 10 -3.1 3.5
 7 0 10 -1.1 5.5
 7 0 10 0.3 5.3
 7 0 10 -9.9 3.8
 7 0 10 0.2 5.5
 7 0 10 -4.6 3.6
 7 0 10 -1.9 1.7
 -7 0 -10 -12.5 7
 -7 0 -10 -0.6 3.2
 -7 0 -10 -3.5 3.9
 -7 0 -10 -1.1 7
 -7 0 -10 -3.2 2.5
 -7 0 -10 2 4
 -7 0 -10 -0.6 2.6
 -7 0 -10 -11.7 5.1
 -7 0 -10 1.6 5.9
 -7 0 -10 -5.7 6.8
 8 0 10 564.04 34.6
 8 0 10 558.94 30.3
 8 0 10 575.54 33.4
 8 0 10 568.24 33.1
 8 0 10 605.34 31.2
 8 0 10 610.84 33.5
 8 0 10 557.94 35.1
 8 0 10 494.45 35.3
 8 0 10 507.95 34.4
 8 0 10 466.65 34.6
 8 0 10 568.34 33.3
 -8 0 -10 543.25 36.8
 -8 0 -10 560.24 39.1
 -8 0 -10 607.54 39.2
 -8 0 -10 527.85 32.5
 -8 0 -10 563.44 36.5
 -8 0 -10 537.25 31.5
 -8 0 -10 567.54 33.1
 -8 0 -10 527.95 35.7
 9 0 10 -3.4 3.4
 9 0 10 -0.7 5.3
 9 0 10 -0.9 2.1
 9 0 10 4 4.4
 9 0 10 -0.4 2.6
 9 0 10 -1.3 4.5
 9 0 10 2.3 3.7
 -9 0 -10 4.4 3.3
 -9 0 -10 2.4 7.3
 -9 0 -10 14.4 9.8
 -9 0 -10 0.1 7.8
 -9 0 -10 17.7 8.1
 -9 0 -10 0.1 3.3
 -9 0 -10 -4.3 6.2
 10 0 10 19.9 5.5
 10 0 10 19 6
 10 0 10 8.6 5.1
 10 0 10 20.9 3.8
 10 0 10 16.6 3.5
 10 0 10 23.2 7.4
 10 0 10 14.9 5
 -10 0 -10 15.1 9.7
 -10 0 -10 20.6 4.5
 -10 0 -10 41.4 11.9
 -10 0 -10 8 10.6
 -10 0 -10 28.3 9.4
 -10 0 -10 20 4
 -10 0 -10 14 9
 11 0 10 -0.4 4.1
 11 0 10 0.6 5.7
 11 0 10 3.5 4.7
 -11 0 -10 2.1 7.4
 -11 0 -10 13.6 10.6
 -11 0 -10 -0.9 9.1
 -11 0 -10 1 2.2
 -11 0 -10 -1.5 8.5
 12 0 10 -2.2 4
 12 0 10 -4.4 3.3
 12 0 10 -6.2 3.8
 12 0 10 3.7 5.9
 -12 0 -10 1.7 10.9
 -12 0 -10 15.4 7.8
 -12 0 -10 8.3 10.4
 -12 0 -10 -10.8 8.4
 13 0 10 1.5 5.3
 13 0 10 10.3 5.1
 13 0 10 -3.4 6.2
 -13 0 -10 -2.7 8.4
 -13 0 -10 -10.4 10.8
 -13 0 -10 4.3 10.9
 -13 0 -10 9.4 6.9
 14 0 10 0.9 4.2
 14 0 10 16.8 5.3
 -14 0 -10 5.8 18.1
 -14 0 -10 -18 9.5
 14 0 -11 -4.4 4
 14 0 -11 -5.5 8.2
 -13 0 11 9.3 9.4
 -13 0 11 13.3 9.4
 13 0 -11 7.3 4.9
 13 0 -11 12.6 9.1
 13 0 -11 4.6 4.2
 -12 0 11 3.5 7.1
 -12 0 11 4.4 8.9
 -12 0 11 4.8 7.5
 12 0 -11 2.2 3.9
 12 0 -11 4.5 6.8
 12 0 -11 8.6 2.8
 12 0 -11 -1.6 4.3
 -11 0 11 53.69 10.6
 -11 0 11 53.59 12
 11 0 -11 43 7
 11 0 -11 52.79 7.5
 11 0 -11 37.1 3.7
 11 0 -11 39.1 3.8
 11 0 -11 26.6 6.8
 11 0 -11 39.9 10.7
 11 0 -11 37.5 5.4
 -10 0 11 0.8 7.2
 -10 0 11 -8.4 6.2
 -10 0 11 1.3 5.8
 -10 0 11 2 7.4
 -10 0 11 -1.7 6.9
 10 0 -11 1.7 4.5
 10 0 -11 -5.1 2.5
 10 0 -11 3.8 4.2
 10 0 -11 -6.7 3.8
 10 0 -11 3.5 2.5
 10 0 -11 -1.5 3.5
 10 0 -11 4.1 2.7
 -9 0 11 17.2 8.2
 -9 0 11 11.1 5.9
 -9 0 11 14 7.7
 -9 0 11 5.2 7
 -9 0 11 8.9 7.1
 9 0 -11 15.6 4
 9 0 -11 23.8 5.4
 9 0 -11 9.6 3.8
 9 0 -11 15.2 5.2
 9 0 -11 19 5.1
 9 0 -11 6 5.9
 9 0 -11 13.4 3.3
 9 0 -11 15.4 5.1
 -8 0 11 -0.9 6.2
 -8 0 11 1.6 6.6
 -8 0 11 -2.1 5.5
 -8 0 11 0.3 6.5
 -8 0 11 2 4.9
 8 0 -11 1.6 4
 8 0 -11 6.2 4.7
 8 0 -11 3.5 2.7
 8 0 -11 -10 5.5
 8 0 -11 2.5 4.7
 8 0 -11 -1.7 4.5
 8 0 -11 8.4 4.3
 8 0 -11 -3.3 3.3
 8 0 -11 2.8 3.4
 8 0 -11 2.9 3.7
 -7 0 11 13.2 7.2
 -7 0 11 25.7 6
 -7 0 11 14.8 5.3
 -7 0 11 27.8 7.8
 -7 0 11 16.5 7.1
 -7 0 11 24.6 3.7
 -7 0 11 16.8 6.5
 -7 0 11 12 7.1
 -7 0 11 19.2 3.9
 7 0 -11 23.4 4.4
 7 0 -11 22.3 7.7
 7 0 -11 20.5 4.7
 7 0 -11 18.3 5.3
 7 0 -11 28.6 7.4
 7 0 -11 25.3 5.7
 7 0 -11 26.4 6.7
 7 0 -11 29.9 5.8
 7 0 -11 29.1 5.7
 7 0 -11 23.7 7.7
 7 0 -11 25.2 5.2
 -6 0 11 -3.3 5.2
 -6 0 11 -2.7 4.7
 -6 0 11 -3.5 2.9
 -6 0 11 0.2 3.5
 -6 0 11 -3.5 3
 -6 0 11 -11.8 4.6
 -6 0 11 -3.9 4
 -6 0 11 -6.1 5
 -6 0 11 -2.2 2.5
 6 0 -11 -3.4 2.7
 6 0 -11 -7.8 3.9
 6 0 -11 2.7 4.4
 6 0 -11 6.2 4.2
 6 0 -11 -6.6 2.3
 6 0 -11 2.9 3.6
 6 0 -11 -2.5 3.6
 6 0 -11 12 6.5
 6 0 -11 -2.1 3.7
 6 0 -11 -4.3 2.7
 6 0 -11 -5.1 3
 -5 0 11 -5 4.6
 -5 0 11 2.4 4.8
 -5 0 11 9.2 3.3
 -5 0 11 0.6 4.4
 -5 0 11 0.2 3.6
 -5 0 11 -1.5 2.9
 -5 0 11 3.8 4.6
 -5 0 11 1.5 1.3
 -5 0 11 1.3 3
 -5 0 11 1.1 1.2
 -5 0 11 4.4 3.9
 5 0 -11 9.8 5.9
 5 0 -11 5.8 2.1
 5 0 -11 7.9 4.4
 5 0 -11 8.9 2.8
 5 0 -11 5.4 4.1
 5 0 -11 -4.5 3.3
 5 0 -11 3.8 3.1
 5 0 -11 0.5 3.2
 5 0 -11 1.4 3.7
 -4 0 11 1.8 4.1
 -4 0 11 -0.1 2.1
 -4 0 11 2.4 3
 -4 0 11 -8.5 3.4
 -4 0 11 4.5 4.3
 -4 0 11 -3.3 3.9
 -4 0 11 -3.9 4.1
 -4 0 11 -0.6 2.1
 -4 0 11 -2 2.8
 -4 0 11 3 3.2
 -4 0 11 -4.9 2.1
 4 0 -11 -4.6 3.7
 4 0 -11 0.3 2
 4 0 -11 6.7 4.4
 4 0 -11 -0.8 3.6
 4 0 -11 2.4 4.8
 4 0 -11 -1.9 2.8
 4 0 -11 -4.3 3
 4 0 -11 2 3.9
 -3 0 11 2589.94 136.99
 -3 0 11 2662.83 139.39
 -3 0 11 2509.05 138.09
 -3 0 11 2870.81 138.79
 -3 0 11 2662.93 136.99
 -3 0 11 2374.66 138.29
 -3 0 11 2764.22 137.99
 -3 0 11 2600.94 136.19
 -3 0 11 2741.33 138.39
 3 0 -11 2573.24 139.09
 3 0 -11 2637.34 139.89
 3 0 -11 2565.24 135.99
 3 0 -11 2313.17 138.69
 3 0 -11 2792.02 138.69
 3 0 -11 2520.95 137.79
 3 0 -11 2656.73 138.69
 3 0 -11 2583.34 137.99
 -2 0 11 -1.3 2.8
 -2 0 11 -1.7 4
 -2 0 11 7.1 2.9
 -2 0 11 -0.6 3
 -2 0 11 -0.2 2.6
 -2 0 11 -0.3 2.8
 -2 0 11 0.6 3.1
 2 0 -11 -2.7 3.2
 2 0 -11 -0.8 3.2
 2 0 -11 -0.1 2.8
 2 0 -11 -2.9 3.6
 2 0 -11 -3.7 3.3
 2 0 -11 -5.3 3.3
 -1 0 11 137.39 9.7
 -1 0 11 133.39 10
 -1 0 11 122.99 11.8
 -1 0 11 130.09 9.1
 -1 0 11 132.89 9.8
 -1 0 11 136.59 10.5
 1 0 -11 105.99 10.2
 1 0 -11 118.49 11.1
 1 0 -11 130.09 10
 1 0 -11 111.99 10.9
 1 0 -11 128.39 10.5
 1 0 -11 120.69 11
 1 0 -11 129.19 9.5
 0 0 11 3.3 3.1
 0 0 11 1 2.5
 0 0 11 -1.6 2.8
 0 0 11 2.9 3.3
 0 0 11 2.5 4.7
 0 0 11 -1.1 3.1
 0 0 -11 1.3 2
 0 0 -11 0.9 2.3
 0 0 -11 -2.1 3.9
 0 0 -11 -0.4 2.8
 0 0 -11 -3 3.3
 0 0 -11 4.8 4
 0 0 -11 -1.1 2.6
 1 0 11 1468.15 81.99
 1 0 11 1636.24 83.79
 1 0 11 1571.74 79.79
 1 0 11 1541.05 81.69
 1 0 11 1490.35 79.69
 1 0 11 1396.76 81.19
 1 0 11 1581.14 81.59
 -1 0 -11 1543.95 80.59
 -1 0 -11 1594.44 82.79
 -1 0 -11 1269.07 81.49
 -1 0 -11 1516.95 81.49
 -1 0 -11 1566.94 79.99
 -1 0 -11 1479.45 82.39
 -1 0 -11 1552.94 80.49
 -1 0 -11 1499.25 82.69
 2 0 11 -1 3
 2 0 11 4.9 3
 2 0 11 -1.8 1.3
 2 0 11 -2.5 2.6
 2 0 11 -2.6 4.4
 2 0 11 2.7 3.2
 2 0 11 -1.6 3.2
 2 0 11 0.5 3.4
 -2 0 -11 4.8 4.4
 -2 0 -11 -3.8 3.5
 -2 0 -11 -4.2 3.4
 -2 0 -11 1.6 1.8
 -2 0 -11 3 2.5
 -2 0 -11 -1.3 2.5
 -2 0 -11 4 3.5
 -2 0 -11 -2.8 2.6
 3 0 11 1735.33 92.89
 3 0 11 1738.53 93.79
 3 0 11 1533.75 93.19
 3 0 11 1682.83 93.79
 3 0 11 1687.83 92.89
 -3 0 -11 1923.51 94.89
 -3 0 -11 1673.13 90.29
 -3 0 -11 1837.22 94.69
 -3 0 -11 1810.32 94.69
 -3 0 -11 1735.33 92.39
 -3 0 -11 1720.43 93.69
 -3 0 -11 1769.12 93.29
 -3 0 -11 1827.32 93.49
 4 0 11 5.5 3.6
 4 0 11 -0.3 3.6
 4 0 11 5.6 5.3
 4 0 11 5.4 3.9
 4 0 11 2 3.4
 4 0 11 -4.5 3
 -4 0 -11 -1 2.4
 -4 0 -11 -4.9 3.7
 -4 0 -11 2.6 4.5
 -4 0 -11 -2.1 3.8
 -4 0 -11 3.9 3.4
 -4 0 -11 0.6 4.3
 -4 0 -11 -1 3.4
 5 0 11 57.39 9.5
 5 0 11 59.79 8
 5 0 11 50.59 7.5
 5 0 11 54.59 8.3
 5 0 11 56.89 8.2
 5 0 11 42.9 7.8
 -5 0 -11 56.09 6.1
 -5 0 -11 54.89 8
 -5 0 -11 65.29 8.5
 -5 0 -11 68.69 9.5
 -5 0 -11 51.49 8
 -5 0 -11 64.69 10.3
 -5 0 -11 39.1 8.2
 -5 0 -11 34.3 9.2
 6 0 11 0.1 5.6
 6 0 11 -0.1 4.1
 6 0 11 -4.1 3.8
 6 0 11 -1.8 4
 6 0 11 -5.2 3.4
 6 0 11 -2.6 3.5
 6 0 11 0.8 4.7
 6 0 11 -2.1 4.4
 -6 0 -11 -12.8 5.1
 -6 0 -11 4.4 6.9
 -6 0 -11 -7.4 3.2
 -6 0 -11 1.7 2.9
 -6 0 -11 -0.8 3.1
 -6 0 -11 -0.3 4
 -6 0 -11 -1.2 5.7
 -6 0 -11 2.5 5.9
 -6 0 -11 -5.1 4
 7 0 11 810.22 51.09
 7 0 11 898.21 48.6
 7 0 11 895.21 52.99
 7 0 11 847.82 49.4
 7 0 11 849.81 50.29
 7 0 11 945.71 49.8
 7 0 11 886.71 49.8
 -7 0 -11 859.61 51.29
 -7 0 -11 855.61 48.1
 -7 0 -11 724.93 52.69
 -7 0 -11 892.41 47.8
 -7 0 -11 887.71 51.79
 -7 0 -11 833.42 47.3
 -7 0 -11 874.01 54.69
 -7 0 -11 887.11 52.39
 -7 0 -11 888.71 49.8
 8 0 11 -1 1.5
 8 0 11 -4.7 3.4
 8 0 11 -3.8 4.4
 8 0 11 -1.2 5.7
 8 0 11 2.1 3.9
 8 0 11 -4.5 4.2
 -8 0 -11 2.8 2.2
 -8 0 -11 8.3 7.3
 -8 0 -11 -3.3 7.1
 -8 0 -11 0.4 6.6
 -8 0 -11 -1.1 3.6
 -8 0 -11 4.4 2.9
 -8 0 -11 -7.9 7.7
 -8 0 -11 0.5 2.1
 -8 0 -11 3.9 8.3
 -8 0 -11 3.7 3.4
 9 0 11 530.45 32.1
 9 0 11 553.04 32.3
 9 0 11 519.75 32.2
 9 0 11 533.05 34.2
 9 0 11 528.05 28.3
 9 0 11 511.25 31.6
 -9 0 -11 528.85 31.5
 -9 0 -11 500.15 29.8
 -9 0 -11 568.74 39.2
 -9 0 -11 530.75 35.2
 -9 0 -11 540.05 35.8
 -9 0 -11 425.16 30.4
 -9 0 -11 516.05 36.3
 -9 0 -11 558.54 38.8
 10 0 11 1.3 3.7
 10 0 11 0.2 2.3
 10 0 11 -0.8 4.7
 10 0 11 3.8 6.1
 10 0 11 -6.8 3.4
 -10 0 -11 -3.2 9.5
 -10 0 -11 2.7 9.9
 -10 0 -11 0.3 7
 -10 0 -11 -3.6 8
 11 0 11 101.19 11.2
 11 0 11 92.49 7.4
 11 0 11 91.89 11
 11 0 11 82.49 12.6
 -11 0 -11 127.69 16.1
 -11 0 -11 88.89 16
 -11 0 -11 131.19 19.8
 -11 0 -11 95.19 8.3
 -11 0 -11 77.69 19.4
 12 0 11 1.4 4.8
 12 0 11 -6.5 2.8
 12 0 11 -1.6 5.5
 12 0 11 -3.6 4.5
 -12 0 -11 0 10.6
 -12 0 -11 19.5 11.9
 -12 0 -11 -0.1 9.6
 -12 0 -11 -6 7.2
 13 0 11 11.8 6.7
 13 0 11 33.4 7.2
 -13 0 -11 -1.7 11.1
 -13 0 -11 16.2 12.4
 -13 0 -11 45.6 13.9
 -13 0 -11 31.7 9.1
 14 0 11 15.4 5.4
 14 0 11 4.5 5.1
 -14 0 -11 -14.2 10.2
 -14 0 -11 10.2 12
 -14 0 -11 -0.4 7.1
 14 0 -12 16.2 9.3
 -13 0 12 8.1 8.2
 -13 0 12 -3.3 6.8
 -13 0 12 6.7 9.2
 13 0 -12 0.9 3.9
 13 0 -12 -5.3 3.9
 13 0 -12 15 9.3
 -12 0 12 123.79 18
 -12 0 12 133.09 17.7
 -12 0 12 122.89 16.6
 12 0 -12 123.39 16.5
 12 0 -12 142.19 11.9
 12 0 -12 105.39 11.1
 12 0 -12 123.19 11.6
 -11 0 12 9.9 8.5
 -11 0 12 6.9 8.3
 -11 0 12 16.8 8.4
 11 0 -12 3.8 2.4
 11 0 -12 -10.8 4.6
 11 0 -12 8.3 3.3
 11 0 -12 -3.4 7.3
 11 0 -12 4.6 4.6
 11 0 -12 -2.7 3.7
 11 0 -12 -0.8 2.5
 -10 0 12 10.3 9.5
 -10 0 12 38.4 11
 -10 0 12 15.9 8.9
 -10 0 12 22.2 8.2
 10 0 -12 18.4 6.1
 10 0 -12 18.9 5.8
 10 0 -12 28.7 6.1
 10 0 -12 31.3 6.2
 10 0 -12 27.9 4.7
 10 0 -12 32.6 5.2
 10 0 -12 32.3 5
 -9 0 12 -5.1 5
 -9 0 12 -12.8 4.6
 -9 0 12 -2.4 6.4
 -9 0 12 -1.9 6.9
 -9 0 12 -7.1 5.9
 9 0 -12 -2.1 3.6
 9 0 -12 0.8 3.5
 9 0 -12 -9.6 3.1
 9 0 -12 15.2 5.2
 9 0 -12 0.7 5.1
 9 0 -12 2.1 2.7
 9 0 -12 3.6 4
 9 0 -12 -4.3 5.4
 -8 0 12 84.99 6.1
 -8 0 12 77.89 12.2
 -8 0 12 70.49 9.3
 -8 0 12 88.69 13
 -8 0 12 73.59 5.8
 -8 0 12 94.29 11.7
 -8 0 12 74.89 12.3
 8 0 -12 84.19 9.5
 8 0 -12 84.29 8.8
 8 0 -12 96.69 8.2
 8 0 -12 98.09 9.3
 8 0 -12 90.69 8.4
 8 0 -12 81.69 9.2
 8 0 -12 85.19 9.5
 8 0 -12 96.09 12.2
 -7 0 12 -3.1 6.2
 -7 0 12 4.1 3.2
 -7 0 12 1.9 4.3
 -7 0 12 -6.8 4.8
 -7 0 12 -0.8 3.5
 -7 0 12 -3.2 6.2
 -7 0 12 -1 6.1
 -7 0 12 3.2 2.9
 -7 0 12 4.2 6.5
 7 0 -12 1.4 4.2
 7 0 -12 8.7 6.3
 7 0 -12 4.4 3.6
 7 0 -12 3.6 4.9
 7 0 -12 2.2 4.6
 7 0 -12 9.7 5.1
 7 0 -12 -1.5 1.8
 7 0 -12 3.2 4.2
 7 0 -12 3.9 6.3
 7 0 -12 -1.5 3.1
 -6 0 12 127.89 13.5
 -6 0 12 133.29 11
 -6 0 12 120.29 13.3
 -6 0 12 121.59 11.5
 -6 0 12 115.89 11.3
 -6 0 12 141.99 14
 -6 0 12 136.59 13.6
 -6 0 12 136.19 12.1
 -6 0 12 141.29 10.6
 6 0 -12 111.89 14.8
 6 0 -12 153.38 11.1
 6 0 -12 166.28 12
 6 0 -12 148.09 11.1
 6 0 -12 158.28 12.9
 6 0 -12 148.49 12.3
 6 0 -12 143.89 9.6
 6 0 -12 150.88 14.9
 6 0 -12 165.58 12.8
 6 0 -12 160.98 15.2
 6 0 -12 158.48 12.6
 -5 0 12 -2.3 1.5
 -5 0 12 -0.6 4.8
 -5 0 12 -3.2 2.7
 -5 0 12 -3 2.8
 -5 0 12 -0.3 4.8
 -5 0 12 -3.1 3.9
 -5 0 12 -7.4 4.3
 -5 0 12 -1.2 4.9
 -5 0 12 -0.2 3.2
 5 0 -12 -2 3.4
 5 0 -12 -0.8 2.4
 5 0 -12 -2.3 3
 5 0 -12 -4.4 4.1
 5 0 -12 8.4 4.9
 5 0 -12 -1.4 3.8
 5 0 -12 -5.3 3.3
 5 0 -12 -0.1 4.1
 -4 0 12 130.39 12.2
 -4 0 12 126.99 10.5
 -4 0 12 118.79 11.9
 -4 0 12 146.59 12.1
 -4 0 12 145.49 10.8
 -4 0 12 125.29 9.2
 -4 0 12 126.69 9.1
 -4 0 12 133.99 9.1
 -4 0 12 126.09 11.6
 -4 0 12 148.49 11.8
 4 0 -12 139.79 11.6
 4 0 -12 129.19 10.8
 4 0 -12 134.79 8.8
 4 0 -12 127.49 11.7
 4 0 -12 131.19 10.5
 4 0 -12 150.38 12.1
 4 0 -12 111.39 11.4
 4 0 -12 135.09 12.9
 -3 0 12 0.9 1.8
 -3 0 12 -1.5 3.3
 -3 0 12 0.5 3.9
 -3 0 12 0.1 2.9
 -3 0 12 -1.9 2.2
 -3 0 12 5 3.3
 -3 0 12 -4.7 2.7
 -3 0 12 -8.2 3.6
 -3 0 12 2.3 4.1
 -3 0 12 0.2 3.7
 3 0 -12 3 4.6
 3 0 -12 3.3 1.5
 3 0 -12 -1.3 3.7
 3 0 -12 -0.5 3.9
 3 0 -12 0.1 3.8
 3 0 -12 -2.3 3.2
 3 0 -12 0.3 3.2
 3 0 -12 -1.9 3.2
 -2 0 12 159.28 11.5
 -2 0 12 161.38 11.9
 -2 0 12 168.18 14.1
 -2 0 12 177.98 11.9
 -2 0 12 162.88 11.6
 -2 0 12 187.28 13.7
 2 0 -12 128.79 11.8
 2 0 -12 156.38 13.3
 2 0 -12 140.89 12.7
 2 0 -12 149.99 13.1
 2 0 -12 160.28 11.8
 2 0 -12 155.18 12.9
 2 0 -12 157.08 11.6
 -1 0 12 8.1 5.5
 -1 0 12 0.5 3.2
 -1 0 12 2.8 3
 -1 0 12 3.6 2.7
 -1 0 12 1.9 3.3
 -1 0 12 0.6 2.6
 1 0 -12 0 2.8
 1 0 -12 -1.3 4.2
 1 0 -12 -1.2 3.1
 1 0 -12 1.5 4.3
 1 0 -12 1 1.6
 1 0 -12 -0.8 2.7
 1 0 -12 0.8 3.6
 0 0 12 5.1 3.2
 0 0 12 -1.4 4.4
 0 0 12 3.1 3
 0 0 12 -0.5 3.2
 0 0 12 3.3 3.3
 0 0 12 4.1 2.8
 0 0 -12 1.1 3
 0 0 -12 7.6 3.6
 0 0 -12 3.5 2.5
 0 0 -12 -2.7 3.9
 0 0 -12 0.2 4.1
 0 0 -12 4.1 2.3
 0 0 -12 -1.7 3.6
 0 0 -12 4.3 4.3
 1 0 12 1.8 3.4
 1 0 12 1 3.5
 1 0 12 1.5 2.1
 1 0 12 0.7 1.9
 1 0 12 0.8 3.4
 1 0 12 6.6 5.4
 1 0 12 0.7 2.9
 -1 0 -12 -1.2 3.5
 -1 0 -12 -3.5 3.5
 -1 0 -12 4.6 4.4
 -1 0 -12 -0.5 4.5
 -1 0 -12 1 3.1
 -1 0 -12 3.8 2.6
 -1 0 -12 -1.1 2.4
 -1 0 -12 -0.2 2.6
 2 0 12 5.2 5.7
 2 0 12 2 2.7
 2 0 12 -1.6 4
 2 0 12 -1.1 3.1
 2 0 12 1.5 2.6
 2 0 12 2.6 3.3
 2 0 12 1.2 1.6
 2 0 12 2.6 3.2
 -2 0 -12 -1.9 2.8
 -2 0 -12 -0.5 3.5
 -2 0 -12 2.8 4
 -2 0 -12 1.2 3.3
 -2 0 -12 9.3 5.1
 -2 0 -12 -0.4 2.7
 -2 0 -12 4.3 2.1
 3 0 12 -0.3 3.1
 3 0 12 7.1 4.2
 3 0 12 -5.9 3.7
 3 0 12 -4.7 4.7
 3 0 12 0.1 3.1
 3 0 12 2.2 3.7
 3 0 12 0.3 3.6
 -3 0 -12 2.1 2.7
 -3 0 -12 0.5 3.5
 -3 0 -12 7.7 3.7
 -3 0 -12 -2.4 3.5
 -3 0 -12 5.9 5.4
 -3 0 -12 2.8 4.5
 -3 0 -12 0.1 1.2
 -3 0 -12 0.8 3.7
 4 0 12 134.59 11.6
 4 0 12 143.99 14.1
 4 0 12 141.49 12
 4 0 12 131.69 11.7
 4 0 12 123.49 11.1
 4 0 12 135.99 11.3
 -4 0 -12 146.79 12.1
 -4 0 -12 134.89 11.1
 -4 0 -12 148.09 13
 -4 0 -12 134.99 10.2
 -4 0 -12 151.58 12.6
 -4 0 -12 143.29 12.5
 -4 0 -12 140.19 12.8
 5 0 12 -5.3 5.4
 5 0 12 4.6 4.3
 5 0 12 -3.3 4.2
 5 0 12 1.9 4.3
 5 0 12 -3.8 3.5
 5 0 12 -2.1 3.8
 -5 0 -12 0.1 3.6
 -5 0 -12 2.4 4.2
 -5 0 -12 -1.5 5.3
 -5 0 -12 -3.1 2.8
 -5 0 -12 -2 6.4
 -5 0 -12 -2 4.9
 -5 0 -12 -1.1 5.7
 -5 0 -12 -5 4
 6 0 12 10.4 7.2
 6 0 12 16.2 5.6
 6 0 12 22.3 6.4
 6 0 12 19.6 6.1
 6 0 12 4.4 5.6
 6 0 12 7.3 5.3
 6 0 12 15 5.2
 -6 0 -12 14.9 7
 -6 0 -12 23.7 4.5
 -6 0 -12 17.1 6.2
 -6 0 -12 11.1 5.8
 -6 0 -12 12.5 6
 -6 0 -12 14.1 6.9
 -6 0 -12 11.3 7
 -6 0 -12 19.1 8.8
 -6 0 -12 10.6 5.7
 7 0 12 6.4 5
 7 0 12 -7.4 4.3
 7 0 12 0.7 4.4
 7 0 12 2 6.5
 7 0 12 -2.1 4.9
 7 0 12 6.5 5.8
 7 0 12 -5.6 3.3
 -7 0 -12 -9.4 4.1
 -7 0 -12 -7.3 5.3
 -7 0 -12 0.8 3.6
 -7 0 -12 -0.9 6
 -7 0 -12 -0.5 4.5
 -7 0 -12 4.5 6.2
 -7 0 -12 -1 7.7
 -7 0 -12 -5.6 3.1
 -7 0 -12 1.7 2.9
 8 0 12 593.54 33.6
 8 0 12 509.55 36.1
 8 0 12 574.04 34.4
 8 0 12 585.84 34.9
 8 0 12 613.94 34.8
 -8 0 -12 542.35 31.1
 -8 0 -12 574.64 40.2
 -8 0 -12 564.94 37.7
 -8 0 -12 527.55 32.1
 -8 0 -12 536.25 36.7
 -8 0 -12 528.45 39.7
 -8 0 -12 601.74 34.7
 -8 0 -12 556.84 37
 -8 0 -12 567.04 31.6
 9 0 12 6.1 6.7
 9 0 12 2.1 4.5
 9 0 12 2.2 3.3
 9 0 12 11 5.6
 -9 0 -12 3.3 3
 -9 0 -12 1.4 6.6
 -9 0 -12 10.2 10.1
 -9 0 -12 11.3 8.1
 -9 0 -12 3 4.2
 -9 0 -12 -2.3 6.9
 -9 0 -12 -3.8 9.4
 10 0 12 180.78 17.5
 10 0 12 179.48 15.1
 10 0 12 163.38 14.2
 10 0 12 159.28 13.5
 -10 0 -12 167.18 13.5
 -10 0 -12 133.89 21.4
 -10 0 -12 201.18 24.4
 -10 0 -12 164.48 18
 -10 0 -12 183.98 23.5
 11 0 12 6.1 5.6
 11 0 12 -7.4 4.1
 -11 0 -12 10.1 9.1
 -11 0 -12 -2.8 6.2
 -11 0 -12 0.7 1.8
 -11 0 -12 -6.9 10.1
 -11 0 -12 15.6 11.5
 12 0 12 358.66 25.6
 12 0 12 320.87 22.6
 12 0 12 330.87 23.3
 -12 0 -12 267.97 30
 -12 0 -12 361.16 31.8
 -12 0 -12 298.17 28.8
 -12 0 -12 344.27 26.5
 13 0 12 3.7 4.9
 13 0 12 10.1 6.4
 -13 0 -12 11 7.2
 -13 0 -12 -15.3 8.3
 -13 0 -12 8.4 10.4
 -13 0 -12 15.9 12.1
 14 0 12 25 7.5
 14 0 12 34.3 7.4
 -14 0 -12 25.6 14.5
 -14 0 -12 46.9 15
 -14 0 -12 25 9.7
 -13 0 13 142.89 20.9
 -13 0 13 211.58 20.6
 -13 0 13 180.58 19.9
 13 0 -13 201.98 15.8
 13 0 -13 219.48 21.8
 13 0 -13 211.48 15.4
 -12 0 13 10 9.2
 -12 0 13 -5.1 7.3
 -12 0 13 -6.1 7.2
 12 0 -13 -6.2 4.1
 12 0 -13 2.5 4.3
 12 0 -13 -2.3 7.6
 -11 0 13 146.19 18.1
 -11 0 13 162.18 19.3
 -11 0 13 109.49 15.2
 -11 0 13 135.69 17
 11 0 -13 124.39 9.7
 11 0 -13 130.19 10.5
 11 0 -13 127.59 9.5
 11 0 -13 104.59 13.3
 11 0 -13 110.39 16.9
 11 0 -13 127.99 11.7
 11 0 -13 100.29 11.6
 -10 0 13 4.2 8.1
 -10 0 13 6 6.7
 -10 0 13 -3.5 7
 -10 0 13 -0.4 7.5
 10 0 -13 2.5 4.4
 10 0 -13 0.1 2.9
 10 0 -13 -2.8 2.8
 10 0 -13 -0.3 3.6
 10 0 -13 -8.9 4.1
 -9 0 13 97.09 12.9
 -9 0 13 65.99 12.4
 -9 0 13 115.39 15
 -9 0 13 87.79 14.3
 -9 0 13 91.69 11.1
 9 0 -13 100.49 9.7
 9 0 -13 104.79 11.3
 9 0 -13 92.79 13.2
 9 0 -13 121.39 10.7
 9 0 -13 102.09 10.4
 9 0 -13 115.69 10.2
 9 0 -13 92.49 9.2
 9 0 -13 99.49 9.1
 -8 0 13 2.4 2.1
 -8 0 13 1.6 6.5
 -8 0 13 7.1 7.2
 -8 0 13 0.1 5.8
 -8 0 13 2.3 6.7
 -8 0 13 -1.4 2.4
 -8 0 13 1.5 4.9
 8 0 -13 4.9 4.5
 8 0 -13 7.1 4.8
 8 0 -13 4.8 3.9
 8 0 -13 6.4 3.3
 8 0 -13 -1.9 3.7
 8 0 -13 6.5 4.1
 -7 0 13 363.56 25.6
 -7 0 13 361.66 22.8
 -7 0 13 351.16 21.7
 -7 0 13 327.87 25.4
 -7 0 13 378.26 24.3
 -7 0 13 315.97 25.4
 -7 0 13 346.87 23.4
 7 0 -13 391.06 24.3
 7 0 -13 395.86 24
 7 0 -13 365.66 25
 7 0 -13 345.97 23.5
 7 0 -13 386.26 22.9
 7 0 -13 409.66 23.6
 7 0 -13 359.66 22.6
 7 0 -13 329.07 26.2
 -6 0 13 0.6 3.2
 -6 0 13 8.2 4.5
 -6 0 13 7.6 6.5
 -6 0 13 -1.1 3.6
 -6 0 13 0.1 4.9
 -6 0 13 -7.6 5.8
 -6 0 13 -5.8 5.8
 -6 0 13 -8.4 5.8
 -6 0 13 -4.6 3.4
 6 0 -13 2.7 3.3
 6 0 -13 5.7 4.5
 6 0 -13 -1.5 4.2
 6 0 -13 1.3 4.5
 6 0 -13 6.6 3.4
 6 0 -13 1.6 4.8
 6 0 -13 11.7 5.3
 6 0 -13 8.1 5.2
 6 0 -13 6.2 6.2
 -5 0 13 104.29 7.3
 -5 0 13 111.49 12.1
 -5 0 13 104.39 9.5
 -5 0 13 103.79 8.6
 -5 0 13 84.79 11.1
 -5 0 13 84.59 9.5
 -5 0 13 122.09 12.8
 -5 0 13 80.79 11.1
 -5 0 13 120.39 10.3
 -5 0 13 110.69 11.1
 5 0 -13 106.79 11.4
 5 0 -13 116.99 9.7
 5 0 -13 103.59 11
 5 0 -13 106.09 10.6
 5 0 -13 102.99 10.7
 5 0 -13 117.59 12.6
 5 0 -13 114.29 8.2
 -4 0 13 -5.8 2.1
 -4 0 13 2.7 5
 -4 0 13 -1.1 4.5
 -4 0 13 3.3 3.5
 -4 0 13 -5.8 4.2
 -4 0 13 1.8 2.8
 -4 0 13 -4.6 3.3
 -4 0 13 -1.9 2.3
 -4 0 13 -2.7 4.6
 -4 0 13 1.3 4.5
 4 0 -13 -6.4 3.3
 4 0 -13 0.6 4.5
 4 0 -13 1.2 4.1
 4 0 -13 1.9 5.2
 4 0 -13 1.5 1.8
 4 0 -13 -7.8 2.8
 4 0 -13 1.6 5
 4 0 -13 1.5 4.2
 -3 0 13 1129.79 58.19
 -3 0 13 1040.9 57.39
 -3 0 13 1205.68 58.49
 -3 0 13 1022 56.69
 -3 0 13 1013.5 57.59
 -3 0 13 1009.1 57.59
 -3 0 13 1035.7 57.99
 -3 0 13 1003.7 55.19
 -3 0 13 1051.49 59.49
 3 0 -13 1011.4 60.49
 3 0 -13 989.2 57.49
 3 0 -13 1100.99 58.19
 3 0 -13 1040.6 57.89
 3 0 -13 966.7 58.59
 3 0 -13 1078.89 54.79
 3 0 -13 1039.2 59.49
 3 0 -13 979.8 58.89
 -2 0 13 1.2 3.2
 -2 0 13 -2.4 2.7
 -2 0 13 -0.6 2.9
 -2 0 13 -1.3 3.3
 -2 0 13 -1.5 3.2
 -2 0 13 -0.5 3.8
 -2 0 13 5.2 5.8
 -2 0 13 0.5 3.3
 2 0 -13 0.5 4.2
 2 0 -13 1.3 4.1
 2 0 -13 4.1 4.8
 2 0 -13 0.7 3.1
 2 0 -13 1.5 3.4
 2 0 -13 3 4.4
 -1 0 13 340.47 20.8
 -1 0 13 348.77 20.6
 -1 0 13 347.07 20.9
 -1 0 13 346.37 20
 -1 0 13 329.87 23.4
 1 0 -13 294.77 22
 1 0 -13 287.57 22.7
 1 0 -13 325.37 21
 1 0 -13 339.67 18.6
 1 0 -13 324.67 22.5
 1 0 -13 345.17 22.6
 1 0 -13 326.17 20.2
 0 0 13 1.1 4.9
 0 0 13 2.8 3.4
 0 0 13 0.4 2.7
 0 0 13 3.8 4
 0 0 13 1.8 3
 0 0 -13 2.6 2.6
 0 0 -13 3.6 3.5
 0 0 -13 0.2 4.6
 0 0 -13 -1.5 2.9
 0 0 -13 1 5
 0 0 -13 1.8 2.3
 0 0 -13 0.3 3.4
 0 0 -13 3.7 5.1
 1 0 13 2.9 5.3
 1 0 13 -1 2.1
 1 0 13 0.2 1.8
 1 0 13 1.4 3.5
 1 0 13 -0.8 3.1
 1 0 13 3.1 3.9
 1 0 13 2.1 3.8
 -1 0 -13 0.6 2.8
 -1 0 -13 2.5 4.6
 -1 0 -13 2.2 2.7
 -1 0 -13 3.8 5
 -1 0 -13 -0.1 2.9
 -1 0 -13 0.9 3.9
 -1 0 -13 -4.7 3.9
 -1 0 -13 0 2.9
 2 0 13 -0.4 1.7
 2 0 13 4.6 4
 2 0 13 4.1 3.7
 2 0 13 0.1 3.6
 2 0 13 -0.2 2.6
 2 0 13 0 2.6
 2 0 13 -1 5.1
 -2 0 -13 -3 4
 -2 0 -13 0.6 2.9
 -2 0 -13 -1.9 2.9
 -2 0 -13 0 3.3
 -2 0 -13 8.1 4.4
 -2 0 -13 -0.7 4.7
 -2 0 -13 -0.5 2.3
 -2 0 -13 -3.7 3.3
 3 0 13 589.94 34.5
 3 0 13 579.44 35.5
 3 0 13 599.74 34.4
 3 0 13 681.43 38.7
 3 0 13 511.55 35
 3 0 13 602.54 35.7
 -3 0 -13 648.34 37.1
 -3 0 -13 600.74 35.4
 -3 0 -13 588.54 34
 -3 0 -13 591.64 36.6
 -3 0 -13 625.24 35.4
 -3 0 -13 605.24 36.7
 -3 0 -13 576.34 31.9
 -3 0 -13 654.03 35
 4 0 13 -0.4 3.5
 4 0 13 -9 5.2
 4 0 13 4.5 4.8
 4 0 13 -3.9 3.4
 4 0 13 2 4
 4 0 13 -2.4 4.7
 -4 0 -13 3.2 4.4
 -4 0 -13 -3.8 4.6
 -4 0 -13 -6.8 4.5
 -4 0 -13 -2.6 3.4
 -4 0 -13 -3.6 4
 -4 0 -13 3 5.4
 -4 0 -13 0.2 3.2
 5 0 13 119.39 12.5
 5 0 13 133.29 12.1
 5 0 13 149.79 15.4
 5 0 13 133.09 11.8
 5 0 13 132.19 12
 5 0 13 137.89 12
 5 0 13 123.89 12.4
 -5 0 -13 143.99 14.3
 -5 0 -13 143.89 12.9
 -5 0 -13 137.09 13.2
 -5 0 -13 151.28 14.1
 -5 0 -13 127.09 13.6
 -5 0 -13 86.69 13.9
 -5 0 -13 111.69 11.2
 -5 0 -13 141.49 13.7
 6 0 13 -7.4 4.9
 6 0 13 -3.9 6.6
 6 0 13 -5.5 4.3
 6 0 13 -1.9 4.1
 6 0 13 3.8 4.6
 6 0 13 -6.1 3.9
 6 0 13 -1.6 4.3
 -6 0 -13 -7.6 5.2
 -6 0 -13 -1.2 5.2
 -6 0 -13 -14.1 4.4
 -6 0 -13 -3.4 5.9
 -6 0 -13 -4.5 5.7
 -6 0 -13 -5.9 7.5
 -6 0 -13 -1.2 4.2
 7 0 13 109.29 11.9
 7 0 13 97.79 11.7
 7 0 13 63.49 11.8
 7 0 13 83.09 10.6
 7 0 13 85.59 10.5
 7 0 13 89.79 10.3
 7 0 13 94.89 10.1
 7 0 13 77.69 8.4
 7 0 13 86.59 11.4
 -7 0 -13 68.29 12
 -7 0 -13 78.59 12.5
 -7 0 -13 83.59 12.7
 -7 0 -13 72.89 13.3
 -7 0 -13 83.99 10.8
 8 0 13 10.6 5.7
 8 0 13 9.8 4.3
 8 0 13 15.3 7.6
 8 0 13 -5.6 4.2
 -8 0 -13 2.6 7.1
 -8 0 -13 4.5 9.3
 -8 0 -13 8 7.3
 -8 0 -13 10.8 7.6
 -8 0 -13 7.1 4.2
 -8 0 -13 8.6 5.5
 -8 0 -13 3.4 8.7
 -8 0 -13 5.3 4.2
 -8 0 -13 3.6 3.1
 9 0 13 439.06 32
 9 0 13 434.16 28.2
 9 0 13 513.95 30.2
 9 0 13 431.96 29.5
 -9 0 -13 456.75 36.4
 -9 0 -13 436.76 33.1
 -9 0 -13 446.76 27.9
 -9 0 -13 457.35 35.8
 -9 0 -13 515.15 29.9
 10 0 13 -4.1 5.3
 10 0 13 -1.1 6.9
 10 0 13 3.9 3.8
 10 0 13 -3.5 4.8
 -10 0 -13 -4.3 8.4
 -10 0 -13 -1.2 4
 -10 0 -13 9.5 10.9
 -10 0 -13 -10 6.7
 -10 0 -13 1.5 8.8
 11 0 13 270.47 20.9
 11 0 13 291.87 24.1
 11 0 13 320.37 22.1
 -11 0 -13 280.17 28.9
 -11 0 -13 271.27 28.9
 -11 0 -13 315.67 24.9
 -11 0 -13 291.57 26.6
 12 0 13 1.2 7
 12 0 13 4.6 6
 -12 0 -13 0.2 9.1
 -12 0 -13 14.3 9.9
 -12 0 -13 0.2 3
 -12 0 -13 0.6 10.2
 -12 0 -13 14.5 8.2
 13 0 13 280.07 22.3
 -13 0 -13 207.38 29.6
 -13 0 -13 261.07 27.3
 -13 0 -13 265.77 23
 -13 0 -13 319.47 30.5
 -13 0 14 2.9 9
 -13 0 14 5.9 8.3
 -13 0 14 -6.8 7.4
 13 0 -14 19.2 5.3
 13 0 -14 13.4 9.4
 13 0 -14 3.7 4.3
 -12 0 14 -4.4 8.2
 -12 0 14 8.2 8.2
 -12 0 14 12.2 9.4
 12 0 -14 7.7 2.3
 12 0 -14 7.4 5
 12 0 -14 2.3 5.6
 12 0 -14 -4.3 7.8
 -11 0 14 -3.8 7.6
 -11 0 14 -8.5 5.9
 -11 0 14 5.1 8.9
 -11 0 14 9 7.9
 11 0 -14 5 3.4
 11 0 -14 -0.5 4.5
 11 0 -14 -3.7 7.2
 11 0 -14 2.8 3.6
 11 0 -14 -2.8 2.8
 11 0 -14 4.5 4.4
 -10 0 14 5.1 7.8
 -10 0 14 -2.6 6.4
 -10 0 14 3 9.1
 10 0 -14 4.2 3.9
 10 0 -14 -3.2 4.7
 10 0 -14 3.1 5.6
 10 0 -14 4 5
 10 0 -14 1.4 5.1
 10 0 -14 4.5 3.8
 -9 0 14 5.7 7.4
 -9 0 14 -3.9 4.6
 -9 0 14 -7.1 6.8
 -9 0 14 0.4 6.1
 -9 0 14 -2.7 6.8
 9 0 -14 18 6.8
 9 0 -14 -3.6 3.8
 9 0 -14 0.8 3.1
 9 0 -14 -1.4 4.6
 9 0 -14 -7.2 3.7
 9 0 -14 -2 3
 9 0 -14 0 4.4
 -8 0 14 71.79 10.5
 -8 0 14 51.29 6.3
 -8 0 14 50.29 9.9
 -8 0 14 51.89 11.2
 -8 0 14 80.19 12.4
 -8 0 14 61.29 11.1
 -8 0 14 48.9 5.6
 8 0 -14 81.09 9.8
 8 0 -14 36.6 7.1
 8 0 -14 52.79 7.3
 8 0 -14 46.6 7.1
 8 0 -14 62.29 9.4
 8 0 -14 63.69 8.8
 -7 0 14 9.6 7.1
 -7 0 14 -0.7 5.1
 -7 0 14 0.2 4.1
 -7 0 14 5.5 6.5
 -7 0 14 10.8 7.2
 -7 0 14 5.1 4.1
 -7 0 14 6 4.5
 -7 0 14 2.3 3.2
 7 0 -14 9.4 5.6
 7 0 -14 10.8 4.1
 7 0 -14 6.1 5
 7 0 -14 13.6 5.7
 7 0 -14 1.6 4.8
 7 0 -14 3.5 3.7
 7 0 -14 5.2 5
 -6 0 14 250.37 18.8
 -6 0 14 256.07 17.9
 -6 0 14 257.47 21
 -6 0 14 276.87 19.3
 -6 0 14 274.07 20.9
 -6 0 14 264.57 20.7
 -6 0 14 261.27 20.8
 -6 0 14 278.77 19.6
 -6 0 14 267.57 17.5
 6 0 -14 279.77 18.6
 6 0 -14 275.47 19.7
 6 0 -14 300.57 19.3
 6 0 -14 272.07 20.2
 6 0 -14 287.07 17
 6 0 -14 292.97 20
 6 0 -14 248.28 21.4
 6 0 -14 299.37 20.2
 6 0 -14 274.37 19.8
 -5 0 14 -3.5 2.3
 -5 0 14 0.7 3.9
 -5 0 14 -1.7 6
 -5 0 14 3.6 2.5
 -5 0 14 -0.1 5.8
 -5 0 14 -5.3 5.4
 -5 0 14 -4.5 2.9
 -5 0 14 2.2 4.4
 -5 0 14 0.3 4
 -5 0 14 -9.5 4.9
 -5 0 14 6.3 5.6
 5 0 -14 4.4 5.1
 5 0 -14 0.2 4.7
 5 0 -14 0.1 2.3
 5 0 -14 5.4 5.1
 5 0 -14 11.3 7.1
 5 0 -14 4.8 3.5
 5 0 -14 2 5.4
 -4 0 14 24.6 5.5
 -4 0 14 21.2 7
 -4 0 14 11.7 3.3
 -4 0 14 21.5 6.3
 -4 0 14 1.9 4
 -4 0 14 9.6 6.1
 -4 0 14 15 6.5
 -4 0 14 17.1 3.8
 -4 0 14 12.5 6
 -4 0 14 11.7 4.2
 4 0 -14 13.7 4.5
 4 0 -14 20.6 6.4
 4 0 -14 22.5 7
 4 0 -14 12.9 2.5
 4 0 -14 8.9 5.5
 4 0 -14 13.4 5.9
 4 0 -14 6.5 5.3
 4 0 -14 18.6 5.8
 -3 0 14 8.4 3.4
 -3 0 14 4.4 5
 -3 0 14 8.3 4.4
 -3 0 14 1.1 2.1
 -3 0 14 9.3 4.1
 -3 0 14 -7.9 5.1
 -3 0 14 4.6 4.5
 -3 0 14 7 5.1
 -3 0 14 8.5 4.2
 3 0 -14 -3.8 4.1
 3 0 -14 8.9 5.6
 3 0 -14 -3.5 4.2
 3 0 -14 -1 3.7
 3 0 -14 4.7 5.5
 3 0 -14 10.6 5.2
 3 0 -14 3.3 1.4
 3 0 -14 7.3 5
 -2 0 14 4932.11 252.27
 -2 0 14 4636.64 251.67
 -2 0 14 4726.33 254.47
 -2 0 14 5499.95 252.87
 -2 0 14 4883.71 251.87
 -2 0 14 4715.03 252.97
 -2 0 14 4896.31 251.87
 -2 0 14 4937.41 252.47
 2 0 -14 4579.24 252.77
 2 0 -14 4888.31 254.07
 2 0 -14 4937.11 252.27
 2 0 -14 4250.07 253.17
 2 0 -14 4678.43 254.07
 2 0 -14 4975.9 249.18
 2 0 -14 4782.92 253.67
 2 0 -14 4689.73 252.47
 -1 0 14 1.4 3.5
 -1 0 14 4.3 5.7
 -1 0 14 6 3.7
 -1 0 14 -0.5 3.1
 -1 0 14 1.9 4
 -1 0 14 0.6 3.2
 1 0 -14 0.7 3.6
 1 0 -14 4.2 1.9
 1 0 -14 -2.9 4.5
 1 0 -14 -2.8 4.1
 1 0 -14 1.3 5.4
 1 0 -14 -2.1 2.7
 1 0 -14 -1.1 4.5
 1 0 -14 2 3.6
 0 0 14 3168.88 171.48
 0 0 14 3332.07 168.98
 0 0 14 3336.77 167.68
 0 0 14 3194.78 168.78
 0 0 14 3215.18 168.88
 0 0 -14 3122.09 170.68
 0 0 -14 3213.38 167.38
 0 0 -14 3109.89 168.58
 0 0 -14 3256.87 170.58
 0 0 -14 3333.67 166.98
 0 0 -14 3085.09 168.98
 0 0 -14 2941.51 170.08
 1 0 14 -0.7 3.8
 1 0 14 2 6
 1 0 14 -2.3 2.9
 1 0 14 -0.6 2.4
 1 0 14 0.8 3.9
 -1 0 -14 1.7 4.4
 -1 0 -14 -0.8 3
 -1 0 -14 5.3 3.7
 -1 0 -14 -0.3 4.4
 -1 0 -14 -1.9 5.1
 -1 0 -14 6 3.5
 -1 0 -14 -0.1 2.9
 2 0 14 20.6 5.6
 2 0 14 21.9 8.1
 2 0 14 14.3 4.1
 2 0 14 11.8 5.2
 2 0 14 12.4 4.8
 2 0 14 19.7 3
 2 0 14 14.7 3.8
 -2 0 -14 16.1 3.7
 -2 0 -14 8.9 5.7
 -2 0 -14 23.5 5.6
 -2 0 -14 15.4 4.1
 -2 0 -14 4.6 4.2
 -2 0 -14 9.8 5.2
 -2 0 -14 19.1 6.9
 3 0 14 3.3 4.2
 3 0 14 -0.9 3.8
 3 0 14 -1.7 4.5
 3 0 14 3.3 6.3
 3 0 14 -2.7 3.1
 3 0 14 5.7 4.3
 -3 0 -14 7.2 5.8
 -3 0 -14 -2.8 3.7
 -3 0 -14 5 4
 -3 0 -14 -0.7 1.5
 -3 0 -14 -1 4
 -3 0 -14 1.9 3.1
 -3 0 -14 -6.5 5.4
 -3 0 -14 1.7 4.6
 4 0 14 756.62 43.8
 4 0 14 650.53 43.2
 4 0 14 756.62 42.9
 4 0 14 831.92 47.1
 4 0 14 764.12 44
 4 0 14 725.33 42.8
 -4 0 -14 754.42 43.3
 -4 0 -14 737.83 42
 -4 0 -14 737.23 44.9
 -4 0 -14 740.53 44.8
 -4 0 -14 801.92 43.6
 5 0 14 -0.5 3.8
 5 0 14 -1.3 5.4
 5 0 14 -0.6 4.5
 5 0 14 0.4 6.8
 5 0 14 -10.3 4.1
 5 0 14 -3.4 3.8
 5 0 14 4.5 4.7
 -5 0 -14 -3 4.1
 -5 0 -14 -8.4 5.4
 -5 0 -14 -0.8 5
 -5 0 -14 -0.7 3.2
 -5 0 -14 -1.4 1.4
 -5 0 -14 -7 6.7
 -5 0 -14 -4.8 5.2
 -5 0 -14 -9.4 4.6
 6 0 14 41.3 8.2
 6 0 14 51.89 8.8
 6 0 14 49 8.3
 6 0 14 30.9 7.4
 6 0 14 41 10.2
 6 0 14 57.69 8.7
 6 0 14 46.2 8.3
 -6 0 -14 53.49 9.9
 -6 0 -14 44 7.3
 -6 0 -14 53.69 10.4
 -6 0 -14 43.2 9.5
 -6 0 -14 43.8 9
 -6 0 -14 34.2 7.4
 -6 0 -14 48.1 6.4
 -6 0 -14 41.7 8.7
 -6 0 -14 28.4 10.2
 7 0 14 2.5 5.6
 7 0 14 1.1 4.3
 7 0 14 1.6 4.9
 7 0 14 -2.9 3.9
 7 0 14 2.5 3.4
 7 0 14 -6 6.8
 -7 0 -14 2.3 8.3
 -7 0 -14 13.8 7.2
 -7 0 -14 -3.4 5.1
 -7 0 -14 -0.3 5.2
 -7 0 -14 -1.2 2.9
 -7 0 -14 -3.1 3.3
 -7 0 -14 10.1 7.2
 -7 0 -14 0 6.6
 8 0 14 44.1 6.7
 8 0 14 51.39 8.9
 8 0 14 37.4 9.7
 8 0 14 46.2 8.4
 -8 0 -14 27.4 8.9
 -8 0 -14 29.3 9.7
 -8 0 -14 47.4 8.6
 -8 0 -14 33.4 11.5
 -8 0 -14 39.7 5.5
 -8 0 -14 48.6 13.7
 -8 0 -14 33.1 5.4
 -8 0 -14 37 6.7
 9 0 14 -1.6 7.2
 9 0 14 1.3 5.4
 9 0 14 1.7 3.7
 9 0 14 1.6 4.4
 -9 0 -14 1.8 4.7
 -9 0 -14 -1.6 7.7
 -9 0 -14 -1.1 8.2
 -9 0 -14 5.9 10.4
 -9 0 -14 -0.9 1.8
 -9 0 -14 5 9.4
 10 0 14 18.3 9.1
 10 0 14 24.8 7.6
 10 0 14 28 6.2
 10 0 14 19.4 6.2
 -10 0 -14 17 9.7
 -10 0 -14 33.8 10.1
 -10 0 -14 6.8 10.9
 -10 0 -14 23.7 6.4
 -10 0 -14 24.3 12.6
 11 0 14 4.1 5.7
 11 0 14 13.8 7.9
 11 0 14 2.7 5.8
 -11 0 -14 1.6 2.7
 -11 0 -14 -2.5 10
 -11 0 -14 -3.3 10.6
 -11 0 -14 0.6 9.3
 -11 0 -14 -0.3 7.6
 12 0 14 257.57 22.8
 -12 0 -14 291.47 27.6
 -12 0 -14 245.38 30.2
 -12 0 -14 288.97 24.3
 -12 0 -14 291.67 29.7
 13 0 14 15.2 7.5
 13 0 14 3.6 5.4
 -13 0 -14 4 11.4
 -13 0 -14 19 8.5
 -13 0 15 4.1 9
 -13 0 15 14 10.3
 -13 0 15 12.6 9.3
 13 0 -15 4.5 4.6
 13 0 -15 13.2 6.5
 13 0 -15 7.4 8.5
 -12 0 15 2.7 7.8
 -12 0 15 -0.9 7.4
 -12 0 15 17.1 9
 12 0 -15 -3.9 2.4
 12 0 -15 0.4 5.3
 12 0 -15 0.9 4.5
 12 0 -15 0.7 2.4
 12 0 -15 0.9 7.8
 -11 0 15 94.89 15.7
 -11 0 15 84.99 13.1
 -11 0 15 101.19 16.4
 -11 0 15 84.59 14.7
 11 0 -15 84.89 11.3
 11 0 -15 68.69 9.3
 11 0 -15 72.79 8.5
 11 0 -15 73.99 8.1
 -10 0 15 -1.7 7.5
 -10 0 15 0.1 7.5
 -10 0 15 -11.6 6.8
 -10 0 15 5 6.4
 10 0 -15 3.7 3.7
 10 0 -15 -4.4 4.3
 10 0 -15 5.1 4.5
 10 0 -15 3.9 5.5
 -9 0 15 -3.4 6.6
 -9 0 15 1.5 1.5
 -9 0 15 4.8 7.8
 -9 0 15 -3.3 5.9
 -9 0 15 10.2 8
 9 0 -15 3 5.7
 9 0 -15 -3.2 4.5
 9 0 -15 12.2 4.1
 9 0 -15 -2.7 4.1
 9 0 -15 -5.6 3.6
 9 0 -15 -0.4 4.5
 -8 0 15 -3.4 3.2
 -8 0 15 5.6 7.2
 -8 0 15 -5 2.3
 -8 0 15 -2.6 5.2
 -8 0 15 -3.5 6.4
 -8 0 15 1.5 3.7
 -8 0 15 -5.2 6.9
 8 0 -15 2.5 4.4
 8 0 -15 -2.7 5.3
 8 0 -15 -1.8 4.2
 8 0 -15 3.8 3.8
 8 0 -15 -7.8 4.2
 8 0 -15 -3.6 4.4
 -7 0 15 663.83 42.9
 -7 0 15 724.13 45.3
 -7 0 15 762.42 45.4
 -7 0 15 726.13 41.6
 -7 0 15 703.93 42.6
 -7 0 15 721.83 41.8
 -7 0 15 800.72 43.9
 -7 0 15 705.93 45.3
 7 0 -15 774.62 44.6
 7 0 -15 747.73 42.8
 7 0 -15 812.02 43.4
 7 0 -15 704.83 44.2
 7 0 -15 753.02 44.1
 7 0 -15 739.33 41.1
 7 0 -15 739.43 43.8
 -6 0 15 4.3 4.7
 -6 0 15 4.5 3.9
 -6 0 15 -5.2 5.8
 -6 0 15 -2 3.5
 -6 0 15 3.1 1.3
 -6 0 15 0.4 4.9
 -6 0 15 8.7 7.1
 -6 0 15 18.3 7.7
 -6 0 15 6.4 6.7
 -6 0 15 1.5 4.7
 6 0 -15 6 5.3
 6 0 -15 16.4 6.3
 6 0 -15 4.8 4.9
 6 0 -15 6.7 5.5
 6 0 -15 1.9 2.8
 6 0 -15 9.3 5.7
 -5 0 15 157.88 11.2
 -5 0 15 149.39 14.8
 -5 0 15 146.09 11.2
 -5 0 15 176.68 15.6
 -5 0 15 158.98 13
 -5 0 15 171.98 11
 -5 0 15 167.58 13.5
 -5 0 15 157.18 13.1
 -5 0 15 157.18 14.9
 -5 0 15 162.48 15.5
 -5 0 15 171.98 15.4
 5 0 -15 179.78 14.8
 5 0 -15 167.08 15.2
 5 0 -15 155.88 15.7
 5 0 -15 157.08 14.6
 5 0 -15 168.58 13.1
 5 0 -15 150.88 10.1
 5 0 -15 204.08 14.6
 5 0 -15 194.98 15.5
 -4 0 15 -3.4 5.6
 -4 0 15 0.6 6.1
 -4 0 15 -6.3 3.4
 -4 0 15 1.9 5.5
 -4 0 15 -2.1 2.5
 -4 0 15 4.2 6
 -4 0 15 5.5 4.4
 -4 0 15 0.9 6.3
 4 0 -15 3.9 5
 4 0 -15 1.9 5.8
 4 0 -15 0.1 5.5
 4 0 -15 0.8 4.8
 4 0 -15 0.1 1.3
 4 0 -15 7.4 6.1
 4 0 -15 -8.6 4.1
 4 0 -15 0.2 4.1
 -3 0 15 54.49 8.1
 -3 0 15 53.29 7.6
 3 0 -15 42.9 8.4
 3 0 -15 60.19 9.8
 -2 0 15 1.6 3.9
 -2 0 15 9.1 6.6
 -2 0 15 4.8 4.5
 -2 0 15 5.9 4.6
 -2 0 15 -4.3 4.6
 -2 0 15 1.4 4.4
 -2 0 15 -1.2 3.6
 -2 0 15 9 5.3
 2 0 -15 1.4 4.1
 2 0 -15 12.8 6.8
 2 0 -15 9.3 5.8
 2 0 -15 11.7 5.9
 2 0 -15 5.7 4.2
 2 0 -15 6.2 6
 2 0 -15 1.2 1.3
 2 0 -15 -5.3 4.5
 -1 0 15 2785.32 154.58
 -1 0 15 2921.61 155.98
 -1 0 15 3143.49 154.08
 -1 0 15 3075.09 154.48
 -1 0 15 2844.22 154.68
 -1 0 15 3037.8 158.08
 -1 0 15 2880.01 154.68
 1 0 -15 2554.24 155.28
 1 0 -15 3003.8 155.48
 1 0 -15 3122.29 157.28
 1 0 -15 2903.11 155.48
 1 0 -15 2582.94 156.08
 1 0 -15 3027.4 152.08
 1 0 -15 2945.51 157.08
 1 0 -15 2972.6 154.08
 0 0 15 1.6 6
 0 0 15 -2.8 2.8
 0 0 15 -1.8 4.4
 0 0 15 2.7 3.2
 0 0 15 2.1 3.7
 0 0 15 -1.3 3.6
 0 0 -15 6.3 4.3
 0 0 -15 -3 4.8
 0 0 -15 1.9 2.7
 0 0 -15 2.9 5.8
 0 0 -15 2.1 3.2
 0 0 -15 -1.3 4.8
 0 0 -15 -1.4 4.1
 0 0 -15 1.1 4.9
 1 0 15 82.79 9.5
 1 0 15 96.19 7.9
 1 0 15 81.79 12.8
 1 0 15 97.29 9.8
 1 0 15 96.19 7.9
 1 0 15 97.69 10.5
 -1 0 -15 109.59 12.8
 -1 0 -15 105.39 8.8
 -1 0 -15 109.69 12.7
 -1 0 -15 108.69 11.5
 -1 0 -15 100.69 8.8
 -1 0 -15 93.09 9.9
 -1 0 -15 98.79 9.4
 2 0 15 3.4 4.1
 2 0 15 -4 4.5
 2 0 15 0.1 3.8
 2 0 15 3.6 2.6
 2 0 15 -1.1 6.4
 2 0 15 3.8 3.2
 -2 0 -15 -0.7 4.8
 -2 0 -15 2.4 5.1
 -2 0 -15 8.4 6.3
 -2 0 -15 1 3.5
 -2 0 -15 1.5 3.7
 -2 0 -15 4 2.8
 -2 0 -15 0.1 3.6
 3 0 15 -2.5 2.8
 3 0 15 3.8 3.4
 3 0 15 -5.2 4.7
 3 0 15 2.9 6.9
 -3 0 -15 -2.3 4.1
 -3 0 -15 4.1 4.4
 -3 0 -15 2.3 1.8
 -3 0 -15 6.6 3.7
 -3 0 -15 -4.7 4.7
 -3 0 -15 -3.8 5.1
 -3 0 -15 0 5.9
 4 0 15 1.4 4.2
 4 0 15 4.9 3.8
 4 0 15 -1.9 1.6
 4 0 15 6.7 4.7
 4 0 15 -3.1 4.8
 4 0 15 4.8 4.3
 4 0 15 9.9 7.5
 -4 0 -15 3.5 5.5
 -4 0 -15 -0.1 6
 -4 0 -15 -3.3 3.4
 -4 0 -15 12.3 5.6
 -4 0 -15 -1.8 2.9
 5 0 15 56.89 9
 5 0 15 58.89 8.5
 5 0 15 79.19 10.2
 5 0 15 53.19 8.7
 5 0 15 40.7 8.5
 5 0 15 60.49 8.2
 5 0 15 45.9 11.1
 -5 0 -15 51.09 6.9
 -5 0 -15 55.29 10.2
 -5 0 -15 49.8 11.2
 -5 0 -15 49.1 9.1
 -5 0 -15 49.7 7.9
 -5 0 -15 59.69 9.6
 6 0 15 -3.7 4.3
 6 0 15 2.5 4.6
 6 0 15 -3.7 6.9
 6 0 15 -4.6 5.1
 6 0 15 7.4 5.1
 -6 0 -15 -9.4 5
 -6 0 -15 3.9 5.9
 -6 0 -15 8.2 8.4
 -6 0 -15 -4.4 2.7
 -6 0 -15 -7.1 5.3
 -6 0 -15 -2.5 5.4
 -6 0 -15 4.7 5.7
 -6 0 -15 -3 3.9
 7 0 15 103.79 15
 7 0 15 106.89 12.7
 7 0 15 101.89 9.4
 7 0 15 120.09 12.1
 -7 0 -15 123.09 15.3
 -7 0 -15 105.39 9.3
 -7 0 -15 109.79 12.1
 -7 0 -15 77.49 14.8
 -7 0 -15 83.79 12.2
 -7 0 -15 102.29 10
 -7 0 -15 77.89 12.9
 8 0 15 -0.7 4.3
 8 0 15 -2.6 3.2
 8 0 15 7.1 5.8
 8 0 15 9.2 7.9
 -8 0 -15 7.4 3.4
 -8 0 -15 -1.5 4.9
 -8 0 -15 -2.8 8.7
 -8 0 -15 2.9 7.5
 -8 0 -15 -4.5 6.8
 -8 0 -15 5.1 5.1
 -8 0 -15 8.5 9.5
 9 0 15 88.79 11.3
 9 0 15 72.39 10.4
 9 0 15 53.09 7.9
 -9 0 -15 69.89 13.3
 -9 0 -15 51.79 14.5
 -9 0 -15 86.39 13.9
 -9 0 -15 94.39 7.4
 -9 0 -15 68.79 7.3
 -9 0 -15 70.49 16.8
 -9 0 -15 90.49 11.1
 -9 0 -15 60.89 6.2
 10 0 15 4 7.5
 10 0 15 -5.5 5.1
 10 0 15 3.7 5
 10 0 15 2.7 4.3
 -10 0 -15 6.3 6.9
 -10 0 -15 -0.1 2.3
 -10 0 -15 6.6 10.7
 -10 0 -15 -1.2 8.5
 -10 0 -15 12.9 11.7
 11 0 15 138.49 14.2
 11 0 15 106.69 14.2
 11 0 15 167.18 18.4
 -11 0 -15 127.99 19
 -11 0 -15 128.59 16.6
 -11 0 -15 156.68 22.9
 -11 0 -15 144.99 23.1
 12 0 15 6.1 6.3
 12 0 15 16.8 9.2
 -12 0 -15 14.2 10.6
 -12 0 -15 -7.2 6.9
 -12 0 -15 19.1 13.5
 -12 0 -15 -4 8.9
 13 0 15 22.1 8.7
 13 0 15 9.6 5.8
 -13 0 -15 21.7 12.8
 -13 0 -15 10.4 11.5
 -13 0 -15 17.2 12.2
 -12 0 16 53.39 13.3
 -12 0 16 31.6 11.4
 -12 0 16 69.29 13
 12 0 -16 55.09 8.4
 12 0 -16 53.09 9
 12 0 -16 32.6 12.1
 -11 0 16 -2.8 8
 -11 0 16 -3.9 6.5
 -11 0 16 3.5 8.3
 -11 0 16 -9.6 7.3
 11 0 -16 -0.2 4.6
 11 0 -16 2.6 6
 11 0 -16 5.8 3.8
 -10 0 16 99.49 15.9
 -10 0 16 143.09 18.7
 -10 0 16 111.39 16.8
 10 0 -16 130.49 14.1
 10 0 -16 139.29 12.8
 10 0 -16 125.99 12.7
 10 0 -16 148.69 12.2
 -9 0 16 -1.9 6.2
 -9 0 16 3.4 7.7
 -9 0 16 -0.5 7.4
 -9 0 16 -0.2 2.2
 9 0 -16 4.3 4.9
 9 0 -16 -6.6 3.5
 9 0 -16 -0.7 5.8
 9 0 -16 -3.3 4.2
 -8 0 16 3.5 7.3
 -8 0 16 2.5 4.7
 -8 0 16 -2.7 6.6
 -8 0 16 4.8 5.7
 -8 0 16 1.5 3.4
 -8 0 16 -2 3.7
 -8 0 16 -4 6.2
 8 0 -16 3.4 5.1
 8 0 -16 -5.3 4.4
 8 0 -16 4.2 6
 8 0 -16 -7.7 4
 8 0 -16 4.1 4.8
 -7 0 16 2.6 6.4
 -7 0 16 5.5 5.8
 -7 0 16 1.3 3.7
 -7 0 16 -4.5 6.4
 -7 0 16 -12.5 5.2
 -7 0 16 1.9 4.7
 -7 0 16 -0.3 3.6
 7 0 -16 1.5 4.9
 7 0 -16 -0.3 5.2
 7 0 -16 5.2 5.6
 7 0 -16 0.4 4.8
 7 0 -16 5.7 5.3
 7 0 -16 2.4 4.4
 -6 0 16 8.8 5.2
 -6 0 16 7.6 6.8
 -6 0 16 14.7 6.1
 -6 0 16 26.7 7.1
 -6 0 16 13.9 2.3
 -6 0 16 11.9 2.1
 -6 0 16 15 3.9
 -6 0 16 9.3 6.6
 -6 0 16 9.5 3.9
 -6 0 16 6.7 6.7
 6 0 -16 23.5 7.4
 6 0 -16 15.4 6.2
 6 0 -16 3.7 5.6
 6 0 -16 17.8 6.5
 6 0 -16 4.5 5
 6 0 -16 25.3 5.8
 -5 0 16 2.5 2.8
 -5 0 16 4.3 6.3
 -5 0 16 0.5 4.2
 -5 0 16 4.3 2.9
 -5 0 16 4.5 6.1
 -5 0 16 4.5 3.4
 -5 0 16 1.2 6
 -5 0 16 -0.7 4.1
 -5 0 16 4.1 6.2
 -5 0 16 5.8 5.3
 -5 0 16 -2.8 5.8
 5 0 -16 2.1 5.6
 5 0 -16 7.4 5.8
 5 0 -16 13.9 4.8
 5 0 -16 8.8 5.1
 5 0 -16 3.1 5.7
 5 0 -16 2.2 4.3
 5 0 -16 7.9 6.6
 -4 0 16 947.21 54.79
 -4 0 16 1059.39 57.89
 -4 0 16 1000.2 53.29
 -4 0 16 952.4 56.59
 -4 0 16 931.81 54.49
 -4 0 16 1069.29 57.49
 -4 0 16 1023.7 57.19
 -4 0 16 993.6 58.79
 -4 0 16 1002.7 57.19
 -4 0 16 957.9 56.19
 4 0 -16 989.9 58.29
 4 0 -16 1014.6 56.69
 4 0 -16 1108.39 57.59
 4 0 -16 995.2 58.19
 4 0 -16 1044.3 58.59
 4 0 -16 934.31 56.89
 -3 0 16 3 4.7
 -3 0 16 6.9 6
 -3 0 16 5.9 4.6
 -3 0 16 7.9 4.8
 -3 0 16 5.3 7
 -3 0 16 9 6
 -3 0 16 4 2.3
 -3 0 16 2.6 5.6
 -3 0 16 -2.2 4.6
 -3 0 16 5.4 3.7
 3 0 -16 -0.3 5.3
 3 0 -16 14.3 6.2
 3 0 -16 6.6 6.3
 3 0 -16 0.5 5.6
 3 0 -16 3.6 4.6
 3 0 -16 6.3 6.5
 3 0 -16 5.2 4.4
 -2 0 16 265.87 17.8
 -2 0 16 247.08 17.5
 -2 0 16 234.88 21.1
 -2 0 16 241.78 17.9
 -2 0 16 279.47 18.8
 -2 0 16 251.77 17.8
 -2 0 16 250.97 18.3
 2 0 -16 250.07 20.1
 2 0 -16 270.67 20.3
 2 0 -16 259.27 19.4
 2 0 -16 236.78 20.1
 2 0 -16 242.48 17.5
 2 0 -16 240.88 20.3
 2 0 -16 262.17 19.5
 -1 0 16 0.8 4.5
 -1 0 16 -4.4 3.3
 -1 0 16 1.4 3.9
 -1 0 16 1 7
 -1 0 16 -6.3 4.4
 -1 0 16 2 5.3
 -1 0 16 1.7 3.8
 1 0 -16 4.7 6.6
 1 0 -16 4.3 5.6
 1 0 -16 -2.2 3.2
 1 0 -16 0.4 4.9
 1 0 -16 -2.3 5.5
 1 0 -16 -2 1.9
 1 0 -16 -3.5 5.7
 0 0 16 380.96 25.3
 0 0 16 412.86 29.2
 0 0 16 427.36 26.2
 0 0 16 408.96 24.1
 0 0 16 391.06 25.3
 0 0 16 417.56 23.9
 0 0 16 387.86 26.4
 0 0 -16 421.46 25.5
 0 0 -16 335.77 26.4
 0 0 -16 391.86 27.7
 0 0 -16 385.16 27.8
 0 0 -16 421.66 23.2
 0 0 -16 400.56 27.5
 1 0 16 -12.3 6.3
 1 0 16 3.1 2.8
 1 0 16 -1.3 4.6
 1 0 16 -2 3.7
 1 0 16 -8.9 4.4
 1 0 16 1.1 2.9
 1 0 16 -5.4 3.2
 -1 0 -16 -6.6 4
 -1 0 -16 -1.7 3.1
 -1 0 -16 -6.1 4.4
 -1 0 -16 1.1 3.4
 -1 0 -16 -8.4 4.9
 -1 0 -16 0.1 3.3
 -1 0 -16 -0.9 6.4
 2 0 16 18.1 8.5
 2 0 16 13.4 6.2
 2 0 16 20.9 6.2
 2 0 16 9.6 3.6
 2 0 16 21.4 4.6
 2 0 16 7.6 4.2
 -2 0 -16 21.7 4.1
 -2 0 -16 22.6 5.2
 -2 0 -16 17.2 5.8
 -2 0 -16 19.2 5.3
 -2 0 -16 4.7 7.1
 -2 0 -16 10.4 6.7
 -2 0 -16 14.7 7.6
 3 0 16 -7.5 2.6
 3 0 16 -1.9 3.9
 3 0 16 -12.6 6.3
 3 0 16 -8.6 4.5
 3 0 16 -2 3.1
 -3 0 -16 -5.1 4.1
 -3 0 -16 -1.3 1.7
 -3 0 -16 -1.3 5.6
 -3 0 -16 -6.3 3.9
 -3 0 -16 2.4 6.7
 -3 0 -16 5.3 4.7
 -3 0 -16 0.5 3.5
 4 0 16 107.29 10.3
 4 0 16 119.99 12.2
 4 0 16 88.79 11.5
 4 0 16 96.59 14.9
 4 0 16 113.39 10.1
 -4 0 -16 124.69 14.7
 -4 0 -16 97.69 9.5
 -4 0 -16 106.39 12.4
 -4 0 -16 111.19 13.7
 -4 0 -16 93.59 10.5
 5 0 16 2.4 4.2
 5 0 16 5.4 4.7
 5 0 16 -0.5 4.4
 5 0 16 -1.4 5.2
 5 0 16 -3.3 7.1
 -5 0 -16 -1.4 5.4
 -5 0 -16 -4.9 6.9
 -5 0 -16 -1 5.6
 -5 0 -16 0.8 4.4
 -5 0 -16 0.3 3.2
 -5 0 -16 -2 6.1
 6 0 16 45 8.4
 6 0 16 28.1 10.4
 6 0 16 45.1 9.4
 6 0 16 31.4 8.2
 6 0 16 51.19 8.2
 -6 0 -16 29.4 8.6
 -6 0 -16 30.9 9
 -6 0 -16 28.8 10.3
 -6 0 -16 35.9 9.6
 -6 0 -16 30.4 5.8
 -6 0 -16 39.7 8.8
 -6 0 -16 37.3 7.3
 7 0 16 4.1 4.8
 7 0 16 1.9 3.2
 7 0 16 -6.2 5
 7 0 16 2.8 8.3
 -7 0 -16 12.4 4.8
 -7 0 -16 -7.6 2.8
 -7 0 -16 -4.1 6.6
 -7 0 -16 4.7 7
 -7 0 -16 0.5 8.3
 -7 0 -16 1.2 5.6
 -7 0 -16 10 7.7
 8 0 16 60.79 13.5
 8 0 16 102.99 12.5
 8 0 16 80.69 10.9
 8 0 16 78.49 8.4
 -8 0 -16 69.99 8.3
 -8 0 -16 58.89 14.6
 -8 0 -16 79.19 8.7
 -8 0 -16 76.69 10.3
 -8 0 -16 92.29 13.8
 -8 0 -16 74.99 13.9
 -8 0 -16 80.69 11.8
 -8 0 -16 94.39 16.9
 9 0 16 -1.5 5.5
 9 0 16 -4.4 3.7
 9 0 16 1 8.2
 9 0 16 8.4 6.6
 -9 0 -16 -5.9 3.2
 -9 0 -16 -0.1 7.5
 -9 0 -16 5.1 9.7
 -9 0 -16 1.3 5.3
 -9 0 -16 9.2 11.5
 -9 0 -16 -0.4 2.8
 -9 0 -16 3.6 3.1
 10 0 16 38.1 6.4
 10 0 16 39.2 11.8
 10 0 16 41.5 7.9
 10 0 16 48.4 9.9
 -10 0 -16 40.8 14.2
 -10 0 -16 47.1 12
 -10 0 -16 58.49 12.3
 -10 0 -16 39.4 14.9
 11 0 16 1.9 8.1
 11 0 16 -6.9 6
 -11 0 -16 11.9 10.9
 -11 0 -16 -1.9 8.6
 -11 0 -16 -5.8 6.9
 -11 0 -16 -3.2 11.6
 -11 0 -16 -1.1 3.8
 12 0 16 1.6 6.2
 12 0 16 7.4 8.3
 -12 0 -16 -2.4 11
 -12 0 -16 1.8 7.6
 -12 0 -16 2.8 11.8
 -12 0 -16 5.3 10.6
 -12 0 17 2.5 8.2
 -12 0 17 0.7 7.3
 -12 0 17 3.9 8.4
 12 0 -17 21.9 10.1
 12 0 -17 2.5 3.1
 12 0 -17 7.2 7
 12 0 -17 3.1 4.7
 -11 0 17 130.99 19.1
 -11 0 17 147.29 17.5
 -11 0 17 142.89 16.1
 -11 0 17 134.49 19.4
 11 0 -17 143.99 12.7
 11 0 -17 158.18 13.7
 11 0 -17 147.99 15.5
 -10 0 17 -5.8 6.9
 -10 0 17 2.1 8.2
 -10 0 17 11.2 7.4
 -10 0 17 -7.5 7
 10 0 -17 11.3 5.9
 10 0 -17 0 4.5
 10 0 -17 -0.9 4.7
 10 0 -17 2.6 4.6
 -9 0 17 52.29 5.8
 -9 0 17 37.3 9.3
 -9 0 17 47.9 11.3
 -9 0 17 32 10.8
 -9 0 17 56.29 12.4
 9 0 -17 46 8.5
 9 0 -17 46.4 8.7
 9 0 -17 53.09 10
 9 0 -17 50.19 8.3
 -8 0 17 0.3 6.9
 -8 0 17 3.7 6.9
 -8 0 17 2.5 4
 -8 0 17 -0.3 6
 8 0 -17 -1 4.2
 8 0 -17 -1.2 5.3
 8 0 -17 5.5 5.6
 8 0 -17 -3 5.7
 8 0 -17 -9.2 5
 -7 0 17 60.49 9.4
 -7 0 17 62.59 9.3
 -7 0 17 47 10.5
 -7 0 17 65.99 7.1
 -7 0 17 66.29 11.5
 -7 0 17 53.39 10.9
 -7 0 17 52.69 8.4
 7 0 -17 67.69 11.5
 7 0 -17 76.09 10.2
 7 0 -17 63.79 10.6
 7 0 -17 53.29 10.4
 7 0 -17 61.79 9.6
 -6 0 17 0.9 4.9
 -6 0 17 -6 3.6
 -6 0 17 5.8 5.7
 -6 0 17 3.5 6.2
 -6 0 17 -1.7 6
 -6 0 17 1.7 6
 -6 0 17 0.2 2.7
 -6 0 17 -1.1 2
 -6 0 17 -0.3 1.7
 6 0 -17 3.2 5
 6 0 -17 -3 4.2
 6 0 -17 -3.6 5.1
 6 0 -17 2.3 5.7
 6 0 -17 3.1 5.8
 -5 0 17 15.5 7.4
 -5 0 17 10.3 6.5
 -5 0 17 20.1 3.6
 -5 0 17 17.1 3.8
 -5 0 17 12 6.5
 -5 0 17 16.1 5.6
 -5 0 17 12.4 6.9
 -5 0 17 11.2 7.2
 5 0 -17 10 4.6
 5 0 -17 15.6 6.1
 5 0 -17 8.5 5.7
 5 0 -17 10.3 7.2
 5 0 -17 12.1 6.6
 -4 0 17 -0.5 2
 -4 0 17 2 5.4
 -4 0 17 -7.9 5.6
 -4 0 17 -1.9 5.8
 -4 0 17 2.7 3.8
 -4 0 17 1.5 5.7
 -4 0 17 0 5.6
 -4 0 17 -4.5 3.8
 -4 0 17 5.4 4.2
 4 0 -17 -0.5 5.2
 4 0 -17 -0.6 6.2
 4 0 -17 3.9 5.2
 4 0 -17 -2.3 4.1
 4 0 -17 -9.8 3.4
 4 0 -17 -1.9 5.6
 4 0 -17 -1.5 6
 -3 0 17 1877.71 99.09
 -3 0 17 1666.83 98.79
 -3 0 17 1735.43 95.39
 -3 0 17 1850.31 98.19
 -3 0 17 1977.7 99.99
 -3 0 17 1794.72 101.89
 -3 0 17 1924.91 99.79
 -3 0 17 2071.79 100.29
 -3 0 17 1781.62 97.89
 3 0 -17 1996.1 101.99
 3 0 -17 1790.72 101.19
 3 0 -17 1627.54 100.59
 3 0 -17 1705.73 98.79
 3 0 -17 1848.02 100.19
 3 0 -17 1785.12 101.19
 3 0 -17 1785.72 99.49
 -2 0 17 3.7 5.2
 -2 0 17 4.2 6.7
 -2 0 17 2.9 4.3
 -2 0 17 -0.2 4.8
 -2 0 17 2.7 4
 -2 0 17 3 4.6
 -2 0 17 -0.5 6
 2 0 -17 2.4 5.3
 2 0 -17 0.9 5.8
 2 0 -17 3.7 6.2
 2 0 -17 4.7 4.5
 2 0 -17 4.1 4.2
 2 0 -17 2.9 6.6
 2 0 -17 9 5.5
 -1 0 17 1663.63 78.49
 -1 0 17 1462.25 76.99
 -1 0 17 1483.95 78.29
 -1 0 17 1345.67 77.19
 -1 0 17 1429.56 81.19
 -1 0 17 1408.06 77.49
 1 0 -17 1206.78 78.19
 1 0 -17 1537.85 80.59
 1 0 -17 1435.76 73.89
 1 0 -17 1230.98 79.29
 1 0 -17 1399.36 76.49
 1 0 -17 1388.96 79.99
 1 0 -17 1326.97 77.99
 0 0 17 1.4 3.3
 0 0 17 -6.5 4.7
 0 0 17 5.6 2.8
 0 0 17 0.3 4.2
 0 0 17 -6.3 3.7
 0 0 17 8.1 3.9
 0 0 17 -9.7 7.2
 0 0 17 2.4 4.9
 0 0 -17 4.6 7.2
 0 0 -17 -1.5 6
 0 0 -17 3.6 3.4
 0 0 -17 -1.7 4
 0 0 -17 1.8 6.4
 0 0 -17 0.3 5.3
 0 0 -17 3.6 2.9
 1 0 17 1366.86 74.69
 1 0 17 1381.56 75.09
 1 0 17 1271.67 72.09
 1 0 17 1323.27 74.69
 1 0 17 1352.96 78.39
 1 0 17 1254.97 75.49
 -1 0 -17 1347.57 75.09
 -1 0 -17 1412.56 77.29
 -1 0 -17 1312.17 73.29
 -1 0 -17 1294.67 73.79
 -1 0 -17 1405.06 72.79
 -1 0 -17 1469.85 77.69
 2 0 17 -0.7 5.1
 2 0 17 1.4 3.4
 2 0 17 5.6 7.5
 2 0 17 -0.4 1.8
 2 0 17 0.3 5.8
 2 0 17 1.1 3.2
 -2 0 -17 2.4 7.1
 -2 0 -17 -2.4 2.6
 -2 0 -17 -4.9 5.3
 -2 0 -17 -0.1 4
 -2 0 -17 0.3 4.2
 -2 0 -17 -0.4 6
 -2 0 -17 6 3.9
 3 0 17 480.55 34.6
 3 0 17 500.65 29.4
 3 0 17 482.05 28.5
 3 0 17 499.75 31.5
 -3 0 -17 460.15 32.2
 -3 0 -17 504.45 30.5
 -3 0 -17 457.55 29.3
 -3 0 -17 503.75 33.3
 -3 0 -17 478.35 30.9
 -3 0 -17 520.35 33.5
 -3 0 -17 493.55 26.7
 4 0 17 -6.9 3.3
 4 0 17 -0.5 4
 4 0 17 5 6.5
 4 0 17 6.1 6
 4 0 17 5.7 8
 -4 0 -17 12.1 7
 -4 0 -17 2 4.2
 -4 0 -17 1.7 6.4
 -4 0 -17 -6.8 4.4
 -4 0 -17 5.3 4
 5 0 17 206.68 15.7
 5 0 17 172.08 14.9
 5 0 17 177.08 16.7
 5 0 17 200.68 17.2
 5 0 17 219.08 21.1
 -5 0 -17 203.48 18.5
 -5 0 -17 246.58 18.3
 -5 0 -17 189.88 19.8
 -5 0 -17 218.88 19
 -5 0 -17 194.08 14.6
 6 0 17 -0.3 5.7
 6 0 17 -0.8 3.8
 6 0 17 2.6 5.2
 6 0 17 0.2 4.5
 6 0 17 3 8
 -6 0 -17 -3.7 7
 -6 0 -17 -8.6 6.4
 -6 0 -17 1.5 6.5
 -6 0 -17 2.7 6.4
 -6 0 -17 -4.2 3.3
 -6 0 -17 6.8 7.1
 -6 0 -17 -0.7 4.1
 7 0 17 51.49 9.3
 7 0 17 68.79 7.4
 7 0 17 71.29 13.4
 7 0 17 54.99 10.3
 -7 0 -17 79.99 12.9
 -7 0 -17 64.29 10.9
 -7 0 -17 62.79 10.8
 -7 0 -17 56.49 13.2
 -7 0 -17 51.39 7.5
 -7 0 -17 73.59 9.2
 -7 0 -17 53.69 11.8
 8 0 17 10.2 4
 8 0 17 -2 5.8
 8 0 17 0 8.1
 8 0 17 -1.3 5
 -8 0 -17 1.2 7.1
 -8 0 -17 0.2 5.8
 -8 0 -17 2.6 5.8
 -8 0 -17 -1.9 3.4
 -8 0 -17 3.7 4.2
 -8 0 -17 -4.5 7
 9 0 17 22.7 7
 9 0 17 34.2 8.8
 9 0 17 15 10
 9 0 17 16.6 5.2
 -9 0 -17 17.7 11.8
 -9 0 -17 13.9 9.3
 -9 0 -17 28.7 6.1
 -9 0 -17 23.5 7.5
 -9 0 -17 14.5 4.5
 -9 0 -17 22.3 5
 -9 0 -17 13.6 12.2
 -9 0 -17 33.1 10
 10 0 17 -7.3 7.7
 10 0 17 3.2 6.1
 10 0 17 4.1 4.2
 10 0 17 -1 6.5
 -10 0 -17 12.6 12.5
 -10 0 -17 -2.4 7.8
 -10 0 -17 2.9 9
 -10 0 -17 2.2 3.1
 -10 0 -17 18.3 12.1
 11 0 17 19.7 7.5
 11 0 17 13.6 9.2
 -11 0 -17 14.8 12.2
 -11 0 -17 -1.2 4.2
 -11 0 -17 17 9.1
 -11 0 -17 5.8 10
 -11 0 -17 12.7 10
 12 0 17 4 8.3
 12 0 17 5.3 6.1
 -12 0 -17 -30.2 8.5
 -12 0 -17 -0.5 17.4
 -12 0 -17 -4.1 7.3
 -12 0 -17 -6.1 9.2
 -12 0 18 20.8 10.9
 -12 0 18 24.2 9.5
 12 0 -18 23.7 8
 12 0 -18 20.8 6.1
 12 0 -18 30.2 13.7
 12 0 -18 22.7 5
 -11 0 18 11.8 9.1
 -11 0 18 8.1 8.2
 -11 0 18 -12 7.6
 -11 0 18 0 7.1
 11 0 -18 6 4.9
 11 0 -18 5.6 7
 11 0 -18 2.1 5.4
 -10 0 18 12.4 9.3
 -10 0 18 2.7 7
 -10 0 18 14.8 10.2
 -10 0 18 27.6 10
 10 0 -18 14.6 6.1
 10 0 -18 17.1 5.7
 10 0 -18 17.4 8.2
 10 0 -18 21.3 6.5
 -9 0 18 -2.4 6.3
 -9 0 18 -8.1 7.3
 -9 0 18 -4.5 7
 -9 0 18 -5.6 6.7
 -9 0 18 -5.2 2.4
 9 0 -18 -8.3 5.7
 9 0 -18 1.5 5.6
 9 0 -18 -2.1 5
 9 0 -18 5.7 4.7
 -8 0 18 6 4.2
 -8 0 18 -0.5 7
 -8 0 18 3.2 5.9
 -8 0 18 10.8 7.9
 -8 0 18 4.3 8.5
 8 0 -18 3.6 5.4
 8 0 -18 -0.1 6.9
 8 0 -18 -0.4 5.4
 -7 0 18 4 4.6
 -7 0 18 6.6 7.1
 -7 0 18 -1.1 6.1
 -7 0 18 -4.3 5.2
 -7 0 18 -0.7 4.6
 -7 0 18 -0.7 6.8
 7 0 -18 5.1 5.3
 7 0 -18 0.4 6.2
 7 0 -18 -7.7 4.9
 7 0 -18 1.5 4.7
 7 0 -18 5 6.1
 -6 0 18 31.9 3.8
 -6 0 18 23.1 3.4
 -6 0 18 39.3 8
 -6 0 18 28.6 8.3
 -6 0 18 31.8 8.6
 -6 0 18 25.1 6.2
 -6 0 18 29.8 4.2
 -6 0 18 33.7 9.2
 -6 0 18 25.1 7.8
 6 0 -18 29.5 8.3
 6 0 -18 42.7 9.7
 6 0 -18 34.1 8.1
 6 0 -18 39.6 8.3
 6 0 -18 24.4 6.9
 -5 0 18 -0.8 1.8
 -5 0 18 -5.3 2.8
 -5 0 18 2.5 6.2
 -5 0 18 -0.6 3.3
 -5 0 18 3.5 6.2
 -5 0 18 -0.2 4.5
 -5 0 18 -6.8 5.2
 -5 0 18 1.2 5.7
 -5 0 18 -1.7 3.8
 5 0 -18 -4.4 6.1
 5 0 -18 -1.9 5.6
 5 0 -18 -5.6 4.1
 5 0 -18 -2.9 5.3
 -4 0 18 10 6.1
 -4 0 18 0.1 5.9
 -4 0 18 -2 1.7
 -4 0 18 -5 3.2
 -4 0 18 -5.5 4.3
 -4 0 18 3.6 4.1
 -4 0 18 1.8 4.6
 -4 0 18 0.9 5.9
 -4 0 18 -0.9 7.1
 4 0 -18 -6.6 5.5
 4 0 -18 4.1 4.4
 4 0 -18 -4.3 4.2
 4 0 -18 0.5 5.5
 4 0 -18 -4.8 5.4
 4 0 -18 -12.7 5.8
 -3 0 18 1.1 5.8
 -3 0 18 -2 5.2
 -3 0 18 4.8 8.2
 -3 0 18 0.5 3.9
 -3 0 18 -11.6 4
 -3 0 18 0.8 3.9
 -3 0 18 -14.1 3.8
 -3 0 18 2.2 1.7
 -3 0 18 -3.6 4.6
 3 0 -18 -1.1 5.9
 3 0 -18 7.4 5.8
 3 0 -18 2.2 5.7
 3 0 -18 -1.3 6.2
 3 0 -18 -0.3 4
 -2 0 18 144.69 13.5
 -2 0 18 164.18 13.5
 -2 0 18 181.18 14.7
 -2 0 18 178.28 10.4
 -2 0 18 181.28 14.5
 -2 0 18 177.48 14
 -2 0 18 163.38 18.2
 -2 0 18 214.78 15.7
 2 0 -18 175.48 13.9
 2 0 -18 167.68 15.8
 2 0 -18 180.68 16.5
 2 0 -18 161.78 15.2
 2 0 -18 139.09 16.6
 2 0 -18 212.78 18.3
 -1 0 18 -1.8 5.4
 -1 0 18 -2.5 4
 -1 0 18 -2.4 4.9
 -1 0 18 -8.3 7
 -1 0 18 -3.2 4
 -1 0 18 -1.3 3.4
 1 0 -18 4.5 7
 1 0 -18 2.7 4.6
 1 0 -18 -1.3 4.9
 1 0 -18 -1.4 3.5
 1 0 -18 -2.1 1.3
 1 0 -18 -4.3 6.1
 1 0 -18 -10.9 5.1
 0 0 18 1372.66 74.89
 0 0 18 1423.36 79.09
 0 0 18 1280.47 74.49
 0 0 18 1316.07 76.09
 0 0 18 1383.06 72.99
 0 0 18 1245.58 71.59
 0 0 18 1286.67 74.69
 0 0 -18 1384.16 77.59
 0 0 -18 1386.86 77.69
 0 0 -18 1371.36 74.59
 0 0 -18 1345.97 77.49
 0 0 -18 1386.96 71.69
 0 0 -18 1340.27 74.49
 1 0 18 7.7 5.3
 1 0 18 -1.7 4.9
 1 0 18 3.5 7.8
 1 0 18 5.2 3.5
 1 0 18 -0.9 2.7
 1 0 18 -7.3 5.2
 1 0 18 6.7 4.6
 -1 0 -18 0.8 3.7
 -1 0 -18 1.4 3.2
 -1 0 -18 -1.2 4.9
 -1 0 -18 1.1 4.6
 -1 0 -18 0.1 6.6
 -1 0 -18 -2.9 7.3
 2 0 18 2332.17 133.19
 2 0 18 2781.72 136.59
 2 0 18 2430.16 136.89
 2 0 18 2682.23 140.29
 -2 0 -18 2625.14 138.39
 -2 0 -18 2366.56 137.79
 -2 0 -18 2566.84 134.19
 -2 0 -18 2436.46 134.49
 -2 0 -18 2409.56 132.99
 -2 0 -18 2635.74 138.59
 3 0 18 14.9 5.4
 3 0 18 5.6 3.3
 3 0 18 8.5 8.5
 3 0 18 -1.2 5.8
 -3 0 -18 2.8 7.1
 -3 0 -18 4.3 3.8
 -3 0 -18 3.2 5.1
 -3 0 -18 6.8 7.3
 -3 0 -18 -2.9 1.9
 -3 0 -18 6 4.3
 4 0 18 69.19 10.7
 4 0 18 65.59 8.8
 4 0 18 62.29 8.2
 4 0 18 79.89 14
 4 0 18 70.89 10.8
 -4 0 -18 74.09 10
 -4 0 -18 101.39 14.1
 -4 0 -18 76.49 9
 -4 0 -18 77.79 10.9
 -4 0 -18 94.09 13.5
 5 0 18 2.2 8.4
 5 0 18 0.2 4.3
 5 0 18 -2 5
 5 0 18 2.4 4.9
 5 0 18 -2.2 6.1
 -5 0 -18 8.1 4.7
 -5 0 -18 8.1 6.8
 -5 0 -18 1.3 7.4
 -5 0 -18 -0.3 5.8
 -5 0 -18 -11.3 5.9
 -5 0 -18 0.6 3.6
 6 0 18 67.69 9.4
 6 0 18 69.09 10.7
 6 0 18 61.29 13.4
 6 0 18 66.79 9.4
 6 0 18 59.29 10.7
 -6 0 -18 77.49 12.1
 -6 0 -18 72.69 13.2
 -6 0 -18 64.99 11.6
 -6 0 -18 63.89 13.1
 -6 0 -18 67.19 11.7
 -6 0 -18 56.19 8.7
 -6 0 -18 67.29 8.1
 7 0 18 -0.4 6
 7 0 18 -10.5 8.3
 7 0 18 -2.8 4.5
 7 0 18 5.5 3.3
 -7 0 -18 -9.9 6.6
 -7 0 -18 6.6 7.1
 -7 0 -18 1.1 4
 -7 0 -18 11.1 7.5
 -7 0 -18 5.6 4.7
 -7 0 -18 1.9 6.7
 -7 0 -18 -1.9 8.5
 8 0 18 131.39 16.4
 8 0 18 205.28 21.9
 8 0 18 176.28 12.7
 8 0 18 181.08 18.7
 -8 0 -18 170.08 18.8
 -8 0 -18 146.99 18.5
 -8 0 -18 154.28 15.7
 -8 0 -18 154.98 12.7
 -8 0 -18 149.88 16.5
 -8 0 -18 168.38 13.8
 -8 0 -18 140.49 20.8
 9 0 18 -9.3 5.4
 9 0 18 7.5 3.9
 9 0 18 3.5 5.7
 9 0 18 -5 8.3
 -9 0 -18 -2.9 9.4
 -9 0 -18 2.5 4.1
 -9 0 -18 -3.1 4.8
 -9 0 -18 7.3 5.1
 -9 0 -18 8.5 8.3
 -9 0 -18 1.8 7.9
 -9 0 -18 -9.6 8.6
 -9 0 -18 -4.2 5
 10 0 18 9.8 7.3
 10 0 18 13.2 9.6
 -10 0 -18 11.7 11.7
 -10 0 -18 15.1 9
 -10 0 -18 11.1 13
 -10 0 -18 17 10
 -10 0 -18 -2 3.1
 11 0 18 -2.8 6.3
 11 0 18 12.5 10.2
 -11 0 -18 3.9 5.5
 -11 0 -18 15.5 12.2
 -11 0 -18 1.1 8.3
 -11 0 -18 6.6 8.7
 -11 0 -18 11.6 12.1
 12 0 18 38.1 9.9
 12 0 18 20.3 17.7
 -12 0 -18 22.8 17.5
 -12 0 -18 28.7 13.8
 -11 0 19 236.88 24.5
 -11 0 19 260.97 24.4
 -11 0 19 255.37 25
 -11 0 19 250.67 22.8
 11 0 -19 306.87 23.8
 11 0 -19 287.67 20.1
 -10 0 19 1.2 6.6
 -10 0 19 -1.6 7.3
 -10 0 19 -2.4 6.8
 -10 0 19 -1.2 7.7
 10 0 -19 -1.1 5.1
 10 0 -19 2.2 5.5
 10 0 -19 3.2 6.8
 -9 0 19 99.39 15.6
 -9 0 19 79.99 14.5
 -9 0 19 99.19 14.8
 9 0 -19 94.69 14.2
 9 0 -19 67.59 10.6
 9 0 -19 85.19 11.9
 9 0 -19 102.19 12.4
 -8 0 19 6.4 8.3
 -8 0 19 -2.9 2.6
 -8 0 19 -4 7.3
 -8 0 19 -12.3 6.1
 -8 0 19 -1.1 6.1
 8 0 -19 9.2 7
 8 0 -19 7.1 6.1
 8 0 -19 -6.3 5.1
 8 0 -19 -6.1 5.8
 -7 0 19 80.99 10.9
 -7 0 19 63.69 10.8
 -7 0 19 71.19 12.7
 -7 0 19 79.99 13.3
 7 0 -19 68.69 10.8
 7 0 -19 75.99 10.3
 7 0 -19 69.29 12.7
 7 0 -19 57.79 12
 7 0 -19 78.29 11.2
 -6 0 19 -3.8 6.5
 -6 0 19 -3.5 6.1
 -6 0 19 0.7 2.5
 -6 0 19 -8 6.2
 -6 0 19 -5.1 5.1
 -6 0 19 -1 2.2
 -6 0 19 1 5.4
 6 0 -19 -3.2 4.9
 6 0 -19 -6.4 6.1
 6 0 -19 3.3 5.9
 6 0 -19 0.3 6.2
 -5 0 19 30.3 5.1
 -5 0 19 36.4 8.5
 -5 0 19 30 3.3
 -5 0 19 30.7 9.3
 -5 0 19 23.3 8.2
 -5 0 19 29.9 6.5
 -5 0 19 40.4 9.3
 -5 0 19 25.6 5.2
 5 0 -19 15 7
 5 0 -19 38.5 10.5
 5 0 -19 22.5 8.3
 5 0 -19 39.1 8.9
 -4 0 19 -5.2 7.3
 -4 0 19 -5.3 5.1
 -4 0 19 -1.6 1.2
 -4 0 19 -3.3 5.8
 -4 0 19 -4.4 3.9
 -4 0 19 -3 3.3
 -4 0 19 4.3 6.5
 4 0 -19 0.7 5.1
 4 0 -19 -7 5.5
 4 0 -19 -4.4 5.9
 4 0 -19 -5.6 5.3
 -3 0 19 241.58 17.2
 -3 0 19 171.68 13.8
 -3 0 19 201.98 15.5
 -3 0 19 199.98 16.3
 -3 0 19 173.08 14.5
 -3 0 19 196.68 19.4
 -3 0 19 175.18 10.4
 3 0 -19 183.18 16.7
 3 0 -19 155.18 16.6
 3 0 -19 208.88 18.6
 3 0 -19 165.98 18
 3 0 -19 163.08 16.1
 3 0 -19 179.98 14.8
 -2 0 19 -1.9 4.7
 -2 0 19 -1.2 4.2
 -2 0 19 -2.8 7.3
 -2 0 19 0.3 5.4
 -2 0 19 -4.7 5.9
 -2 0 19 1.2 1.6
 2 0 -19 -3.8 6.2
 2 0 -19 -8.9 5.5
 2 0 -19 4.3 3.7
 2 0 -19 6.4 4.8
 2 0 -19 -1.5 4.7
 2 0 -19 2 6.3
 -1 0 19 71.19 13.5
 -1 0 19 108.59 11.3
 -1 0 19 89.29 9.7
 -1 0 19 83.79 9.5
 -1 0 19 89.69 11
 -1 0 19 67.29 5.8
 1 0 -19 62.59 12.1
 1 0 -19 67.59 8.6
 1 0 -19 58.09 11.1
 1 0 -19 71.69 11.2
 1 0 -19 83.49 11.3
 1 0 -19 77.69 12.8
 0 0 19 -2.4 5.2
 0 0 19 -7.9 3
 0 0 19 -1.4 4.1
 0 0 19 2.8 8.4
 0 0 19 0.9 2.3
 0 0 -19 0.9 4
 0 0 -19 -3.7 7.2
 0 0 -19 0.5 5.1
 0 0 -19 0.6 4.4
 0 0 -19 -6.5 6.4
 0 0 -19 4.7 2.7
 1 0 19 651.13 38.3
 1 0 19 654.33 45.2
 1 0 19 748.13 39
 1 0 19 672.63 41.5
 -1 0 -19 692.03 38.7
 -1 0 -19 750.92 45.2
 -1 0 -19 663.93 39.7
 -1 0 -19 738.03 44.6
 -1 0 -19 635.04 40.4
 2 0 19 7 6.4
 2 0 19 16.3 9.8
 2 0 19 1.7 3.2
 -2 0 -19 -6.6 6.5
 -2 0 -19 1.8 7
 -2 0 -19 3.7 3.2
 -2 0 -19 -6.4 3
 -2 0 -19 7 4.3
 3 0 19 3.7 6.2
 3 0 19 0 3.3
 3 0 19 -1 7.7
 -3 0 -19 2.9 7.2
 -3 0 -19 -8.3 6.4
 -3 0 -19 1.7 1.9
 -3 0 -19 5.2 4.2
 -3 0 -19 9.4 7.6
 4 0 19 4.3 4.2
 4 0 19 -10.9 7.1
 4 0 19 -7 3.4
 4 0 19 -6.5 6.1
 -4 0 -19 -4.8 3.4
 -4 0 -19 -6.7 4.6
 -4 0 -19 -2.1 7
 -4 0 -19 1 7
 5 0 19 22.7 8.2
 5 0 19 23.4 6
 5 0 19 27.7 10.9
 5 0 19 40.9 6.9
 -5 0 -19 30.1 10.5
 -5 0 -19 34.2 10.9
 -5 0 -19 30.5 7.8
 -5 0 -19 43.8 10.1
 -5 0 -19 31.6 6.2
 6 0 19 -6 4.7
 6 0 19 -5.2 6.1
 -6 0 -19 -1.6 3.8
 -6 0 -19 -5.3 6.6
 -6 0 -19 14.8 8.8
 -6 0 -19 6.1 6.3
 -6 0 -19 1.5 6.7
 -6 0 -19 3.1 7.5
 -6 0 -19 6.9 4.8
 7 0 19 455.95 27
 7 0 19 481.45 35.5
 -7 0 -19 469.55 32.3
 -7 0 -19 455.95 33.2
 -7 0 -19 467.15 32.7
 -7 0 -19 492.65 32.1
 -7 0 -19 406.76 27.5
 -7 0 -19 408.96 28.9
 8 0 19 2.5 3.5
 8 0 19 -9.6 8.3
 8 0 19 -8.1 5.8
 -8 0 -19 9.5 8.1
 -8 0 -19 10 6.9
 -8 0 -19 -5.6 3.7
 -8 0 -19 0 4.9
 -8 0 -19 -7.5 7.6
 -8 0 -19 -0.2 6.4
 -8 0 -19 -3.3 9.1
 9 0 19 65.49 11.8
 9 0 19 78.79 15.9
 9 0 19 50.69 7.2
 -9 0 -19 55.69 10.4
 -9 0 -19 49.5 7.9
 -9 0 -19 57.39 12.3
 -9 0 -19 38.7 10.9
 -9 0 -19 44.3 15.5
 -9 0 -19 44.5 6.9
 -9 0 -19 65.49 16
 -9 0 -19 77.19 9.7
 10 0 19 -10.4 6.2
 10 0 19 14 10.2
 -10 0 -19 12.4 11
 -10 0 -19 10.4 8.5
 -10 0 -19 -2.9 7.6
 -10 0 -19 1.5 1.6
 -10 0 -19 -12.9 9.8
 -10 0 -19 -3.3 2.9
 11 0 19 39.7 10.5
 11 0 19 47.7 13.8
 -11 0 -19 50.89 15.5
 -11 0 -19 21.2 11.1
 -11 0 -19 33.1 10.5
 -11 0 -19 53.79 16.9
 -11 0 20 0.3 6.9
 -11 0 20 17 9
 -11 0 20 11.7 10.2
 11 0 -20 15.4 8.1
 11 0 -20 0.4 4.9
 11 0 -20 12.1 6
 -10 0 20 22.6 10.1
 -10 0 20 5.3 8.5
 -10 0 20 33.9 10.6
 -10 0 20 7.6 7.7
 10 0 -20 23 7.7
 10 0 -20 14.9 6.6
 -9 0 20 -2.6 3.6
 -9 0 20 0.1 7.4
 -9 0 20 -1.8 5.9
 -9 0 20 -6.9 7.2
 -9 0 20 4.8 8.6
 9 0 -20 -2.6 5.6
 9 0 -20 4.6 5.7
 9 0 -20 -5.5 6.7
 -8 0 20 9.5 8.7
 -8 0 20 -1.4 3.1
 -8 0 20 21.5 8.9
 -8 0 20 16.9 7.4
 -8 0 20 27.4 9.8
 8 0 -20 8.1 6.4
 8 0 -20 0.6 7.8
 8 0 -20 22.5 8.8
 8 0 -20 10.1 6.4
 -7 0 20 -9.1 5.4
 -7 0 20 -8.5 6.8
 -7 0 20 -3.5 6.1
 -7 0 20 2.8 3.5
 -7 0 20 5.5 7.8
 7 0 -20 -4.1 6.4
 7 0 -20 3.2 6.7
 7 0 -20 -8.2 6.4
 7 0 -20 8.8 6.2
 -6 0 20 23.2 7
 -6 0 20 23.4 8.3
 -6 0 20 15 8
 -6 0 20 13.1 7.9
 -6 0 20 12.8 3.3
 6 0 -20 5.2 6.6
 6 0 -20 26.8 7.2
 6 0 -20 17.8 8.2
 6 0 -20 37 10.5
 -5 0 20 -8 4.8
 -5 0 20 0.5 3.7
 -5 0 20 -1.2 4.4
 -5 0 20 3.7 6.9
 -5 0 20 -6.8 5.7
 -5 0 20 8.3 7.1
 -5 0 20 -4 3.1
 5 0 -20 3 7.1
 5 0 -20 3.9 6.3
 5 0 -20 -0.7 7.7
 5 0 -20 -6.1 4.6
 -4 0 20 33.5 8.1
 -4 0 20 30.4 9.6
 -4 0 20 34.4 6
 -4 0 20 29.8 6.5
 -4 0 20 57.39 10.7
 -4 0 20 39 9
 4 0 -20 36.7 9.2
 4 0 -20 14.3 7.1
 4 0 -20 43.1 10.9
 4 0 -20 39.1 10
 -3 0 20 7.9 6.2
 -3 0 20 -3.1 4.4
 -3 0 20 4.2 5.5
 -3 0 20 -2.3 6.1
 -3 0 20 -8.9 6.7
 3 0 -20 12.3 5.8
 3 0 -20 -1.4 6.5
 3 0 -20 2.4 4.7
 3 0 -20 1.2 6.3
 3 0 -20 2.7 6.6
 3 0 -20 -4 7
 -2 0 20 141.29 13.9
 -2 0 20 139.09 12.2
 -2 0 20 130.19 7.9
 -2 0 20 135.99 12.5
 -2 0 20 151.18 13.4
 -2 0 20 130.19 7.9
 -2 0 20 141.09 18.1
 2 0 -20 130.59 15
 2 0 -20 112.39 16.3
 2 0 -20 149.99 17.6
 2 0 -20 137.69 16.6
 2 0 -20 124.49 11.8
 -1 0 20 0.9 2.1
 -1 0 20 2.6 4
 -1 0 20 0.1 5.8
 -1 0 20 -4.1 5.3
 -1 0 20 -4.1 7.7
 1 0 -20 4.3 5.1
 1 0 -20 2.3 6.5
 1 0 -20 -1.9 3.2
 1 0 -20 -4.1 5.6
 1 0 -20 -5.1 6.6
 1 0 -20 3 7.4
 0 0 20 7.1 6.2
 0 0 20 20.7 5.1
 0 0 20 13.3 3.4
 0 0 20 9 9.2
 0 0 -20 15.6 3
 0 0 -20 10.6 8.4
 0 0 -20 10.8 5.1
 0 0 -20 18.1 9
 1 0 20 -8 5.5
 1 0 20 -3.1 8.6
 1 0 20 4.5 4.1
 -1 0 -20 -2.7 7.8
 -1 0 -20 5.6 3.4
 -1 0 -20 15.4 8.6
 -1 0 -20 3.1 4
 2 0 20 47.2 9.8
 2 0 20 38.5 12.5
 2 0 20 58.69 7.4
 2 0 20 57.19 6.9
 -2 0 -20 59.29 8.3
 -2 0 -20 62.49 6.7
 -2 0 -20 60.09 11.9
 -2 0 -20 67.99 8.2
 -2 0 -20 53.59 12.4
 3 0 20 -1 5.9
 3 0 20 -7 8.4
 3 0 20 -0.6 3.5
 -3 0 -20 -1.9 1.6
 -3 0 -20 -6.1 7
 -3 0 -20 3.2 4.8
 -3 0 -20 -0.8 6.9
 -3 0 -20 0.2 4.2
 4 0 20 390.56 27.2
 4 0 20 356.56 30.6
 4 0 20 361.06 24.3
 -4 0 -20 352.66 24.5
 -4 0 -20 384.66 25.7
 -4 0 -20 412.56 29.8
 -4 0 -20 400.86 29.4
 5 0 20 4.3 4.1
 5 0 20 -4.7 4.2
 5 0 20 -5.2 6.2
 -5 0 -20 -4.7 6.8
 -5 0 -20 -8.2 7.4
 -5 0 -20 9.2 6.2
 -5 0 -20 -3.6 7.4
 6 0 20 186.18 23.4
 6 0 20 189.48 18.4
 -6 0 -20 215.48 18.6
 -6 0 -20 212.38 20.1
 -6 0 -20 166.08 14.9
 -6 0 -20 181.38 19
 -6 0 -20 204.18 21.7
 7 0 20 -8 6.5
 7 0 20 3.7 3.4
 7 0 20 4 10.3
 -7 0 -20 4.1 4.5
 -7 0 -20 3.3 8.3
 -7 0 -20 11.4 7.8
 -7 0 -20 -7.2 5.7
 -7 0 -20 4.7 10.1
 -7 0 -20 0.9 7.2
 8 0 20 132.79 10.8
 8 0 20 139.99 17
 8 0 20 151.08 21.3
 -8 0 -20 120.39 12.1
 -8 0 -20 154.08 16.9
 -8 0 -20 151.18 18.7
 -8 0 -20 134.69 15.8
 -8 0 -20 97.99 19.2
 -8 0 -20 129.79 17.5
 9 0 20 3 7.2
 9 0 20 7.5 10.1
 -9 0 -20 -9.6 6.4
 -9 0 -20 2.4 8
 -9 0 -20 -8.7 11.5
 -9 0 -20 -5.5 5.1
 -9 0 -20 -4.2 10.8
 -9 0 -20 2 3.3
 10 0 20 -2.8 7
 10 0 20 -4.1 8.9
 -10 0 -20 7.1 5.1
 -10 0 -20 7.9 12.5
 -10 0 -20 22.1 9.4
 -10 0 -20 -3.1 9
 -10 0 -20 -10.6 9.3
 -10 0 -20 3.5 3.1
 11 0 20 8.9 7.2
 11 0 20 3.8 10.2
 -11 0 -20 17.9 9.1
 -11 0 -20 9.8 13
 -11 0 -20 7 9.4
 -10 0 21 17.1 8.8
 -10 0 21 17.1 9.4
 -10 0 21 9.8 9.1
 -10 0 21 14.7 7.1
 10 0 -21 8.9 6.8
 10 0 -21 1.9 6.7
 -9 0 21 3.7 6.3
 -9 0 21 13.9 9.8
 -9 0 21 19.2 9.4
 -9 0 21 7.5 8.7
 9 0 -21 18.5 7.2
 9 0 -21 10.3 7.2
 9 0 -21 31.2 10
 -8 0 21 2.4 4
 -8 0 21 5.1 7.6
 -8 0 21 11.4 8.8
 -8 0 21 9 6.7
 -8 0 21 1.4 7.2
 8 0 -21 12.9 10.6
 8 0 -21 11.7 6.7
 8 0 -21 6.4 6.7
 -7 0 21 442.16 29
 -7 0 21 422.56 31.3
 -7 0 21 383.86 30.8
 -7 0 21 413.46 31.4
 7 0 -21 449.76 30.8
 7 0 -21 459.25 31.9
 7 0 -21 453.75 30.4
 7 0 -21 438.46 33.8
 -6 0 21 0.7 6.6
 -6 0 21 -1.6 2.7
 -6 0 21 -8.1 6.3
 -6 0 21 8.5 7.5
 -6 0 21 -8.5 6.9
 -6 0 21 0.3 5.5
 6 0 -21 -2.3 6.8
 6 0 -21 -8 6.2
 6 0 -21 0.5 5.8
 6 0 -21 -3.1 6.8
 -5 0 21 64.49 7.7
 -5 0 21 88.59 10.8
 -5 0 21 102.89 13.7
 -5 0 21 72.09 8.5
 -5 0 21 80.59 12.2
 -5 0 21 93.19 14.5
 5 0 -21 110.89 15.8
 5 0 -21 77.29 12.9
 5 0 -21 76.99 12.3
 -4 0 21 5.6 5.6
 -4 0 21 -6.8 6.4
 -4 0 21 -7.3 3.6
 -4 0 21 0.9 6.4
 -4 0 21 5.7 5.2
 -4 0 21 7.6 11.1
 4 0 -21 5 8.1
 4 0 -21 -6.9 6.9
 4 0 -21 -6.1 5.1
 4 0 -21 8.1 7.1
 -3 0 21 -1.7 5
 -3 0 21 -1.8 6.2
 -3 0 21 3.2 5.3
 -3 0 21 -9.9 3.6
 -3 0 21 6.9 9.2
 -3 0 21 3.2 6.3
 3 0 -21 -12.2 5.8
 3 0 -21 -9.6 5
 3 0 -21 1 7.4
 3 0 -21 -1.4 7.7
 -2 0 21 1 4.7
 -2 0 21 -8.4 5.1
 -2 0 21 13.9 8.8
 -2 0 21 -3.2 5.8
 2 0 -21 -0.4 7.1
 2 0 -21 1.8 4.9
 2 0 -21 1.5 8
 2 0 -21 -5.1 4.3
 2 0 -21 3.6 6.6
 -1 0 21 -3.6 8.2
 -1 0 21 -5.7 5.1
 -1 0 21 -5.1 4
 -1 0 21 4.8 6.3
 -1 0 21 2.4 2
 1 0 -21 8.7 8.4
 1 0 -21 3.2 5.3
 1 0 -21 0.4 7.1
 0 0 21 4.8 2.7
 0 0 21 2.5 8.4
 0 0 21 -4.9 5.7
 0 0 21 -7 3.7
 0 0 -21 3.5 4.3
 0 0 -21 -5.7 7.4
 0 0 -21 -9.4 6.8
 1 0 21 358.76 29.9
 1 0 21 348.17 21.7
 1 0 21 349.17 24.8
 -1 0 -21 340.27 20.8
 -1 0 -21 320.27 22.3
 -1 0 -21 342.77 27.7
 -1 0 -21 362.06 28.5
 2 0 21 9.5 6.9
 2 0 21 0.5 5.5
 2 0 21 -3.4 8
 2 0 21 0.5 3.3
 -2 0 -21 6.3 4.2
 -2 0 -21 0.1 7.5
 -2 0 -21 -5.8 7.7
 -2 0 -21 5.3 3.4
 3 0 21 57.19 11.6
 3 0 21 67.09 8.1
 3 0 21 55.39 13.9
 -3 0 -21 54.69 12.2
 -3 0 -21 54.39 8.9
 -3 0 -21 57.09 12.5
 4 0 21 -11 5.9
 4 0 21 5.2 3.9
 4 0 21 -9.4 9.6
 -4 0 -21 -1.9 7.9
 -4 0 -21 -1.3 4.6
 -4 0 -21 -1.3 6.8
 -4 0 -21 -4 4.3
 5 0 21 230.58 20.7
 5 0 21 266.87 18.5
 5 0 21 255.57 25.7
 -5 0 -21 249.28 24.9
 -5 0 -21 196.58 17.5
 -5 0 -21 263.37 22.9
 -5 0 -21 265.67 23.2
 -5 0 -21 240.28 19.9
 6 0 21 -7.6 6.3
 6 0 21 -3.4 9.8
 -6 0 -21 -0.6 7.2
 -6 0 -21 -0.6 7.6
 -6 0 -21 12.1 11.1
 -6 0 -21 4.2 6.4
 -6 0 -21 -1.3 4.2
 7 0 21 43 13.9
 7 0 21 40.6 9.8
 7 0 21 39.7 5.5
 -7 0 -21 34.8 10.2
 -7 0 -21 12.4 10.8
 -7 0 -21 26.2 9.3
 -7 0 -21 51.19 12
 -7 0 -21 26.9 7.6
 -7 0 -21 27.7 10.6
 8 0 21 11.8 7.8
 8 0 21 7.7 9.6
 -8 0 -21 -0.7 8
 -8 0 -21 10.6 9.6
 -8 0 -21 10.8 10.9
 -8 0 -21 -3.1 7.4
 -8 0 -21 -3.9 6.4
 -8 0 -21 10.5 7.5
 9 0 21 109.09 15.5
 9 0 21 122.19 19.4
 -9 0 -21 115.39 16.8
 -9 0 -21 99.89 16
 -9 0 -21 83.59 19
 -9 0 -21 92.69 12.1
 -9 0 -21 90.19 19.8
 10 0 21 5.4 7.1
 -10 0 -21 -7.4 10.2
 -10 0 -21 10.5 13.2
 -10 0 -21 -7.6 7.9
 -10 0 -21 5.1 6.2
 -10 0 -21 1.2 3.4
 -10 0 22 103.89 16.9
 -10 0 22 101.29 20.4
 -10 0 22 91.49 13.7
 10 0 -22 129.59 16.9
 10 0 -22 123.59 13.5
 10 0 -22 102.59 13.8
 -9 0 22 -0.6 8.2
 -9 0 22 11.6 9
 -9 0 22 -7.2 8.1
 -9 0 22 -4.2 5.5
 9 0 -22 3.7 8.2
 9 0 -22 -3.3 6
 9 0 -22 2.7 5.7
 -8 0 22 46.1 11.1
 -8 0 22 46.2 10.5
 -8 0 22 25.5 8.9
 -8 0 22 45.7 8.9
 -8 0 22 3.7 4.9
 8 0 -22 27.9 9
 8 0 -22 20.7 10
 -7 0 22 3.9 8.2
 -7 0 22 10.5 3.3
 -7 0 22 11 8.7
 -7 0 22 -1.3 6.8
 -7 0 22 6.3 6.2
 7 0 -22 -5.5 5.8
 7 0 -22 -0.3 8.1
 7 0 -22 16.8 8.4
 7 0 -22 11.4 7.5
 -6 0 22 159.58 17.9
 -6 0 22 187.48 17.9
 -6 0 22 137.49 11.5
 -6 0 22 131.99 16.9
 -6 0 22 166.28 15.1
 -6 0 22 171.18 17
 6 0 -22 220.48 20.7
 6 0 -22 147.49 16.5
 6 0 -22 152.58 18.8
 6 0 -22 164.38 17.1
 -5 0 22 9.3 7
 -5 0 22 2.7 6.8
 -5 0 22 -4.3 7.4
 -5 0 22 -0.7 4
 -5 0 22 3 5.2
 -5 0 22 -1.5 7.3
 -5 0 22 -6 3.8
 5 0 -22 -0.7 6.7
 5 0 -22 -0.3 6.9
 5 0 -22 13.5 8.8
 5 0 -22 -5.6 5.8
 -4 0 22 73.49 13.9
 -4 0 22 74.59 11.4
 -4 0 22 64.79 12
 -4 0 22 52.29 11.1
 -4 0 22 57.99 8.3
 -4 0 22 69.89 9.5
 4 0 -22 66.29 13.3
 4 0 -22 87.29 13.3
 4 0 -22 68.19 12.1
 -3 0 22 -4.4 8.4
 -3 0 22 6.6 6
 -3 0 22 6.4 5.3
 -3 0 22 -2.7 6.2
 3 0 -22 0.6 7.2
 3 0 -22 -8.7 5.6
 -2 0 22 5.7 5.5
 -2 0 22 2.7 8.8
 -2 0 22 15.9 8.6
 -2 0 22 -3.9 5.6
 2 0 -22 9.5 6.5
 2 0 -22 -4.6 4.6
 2 0 -22 7.5 13
 2 0 -22 -0.6 8.4
 -1 0 22 -0.8 7.9
 -1 0 22 -1 1.5
 -1 0 22 3.4 4.9
 -1 0 22 -0.4 5.5
 1 0 -22 -3.1 6.4
 1 0 -22 -10 11.5
 1 0 -22 12.7 6.7
 0 0 22 249.08 20.5
 0 0 22 245.78 17.8
 0 0 22 246.28 15.3
 0 0 22 285.07 25.6
 0 0 -22 268.07 24
 0 0 -22 263.37 19.3
 1 0 22 10.5 9.4
 1 0 22 -5.9 3.4
 1 0 22 -2.5 6.9
 -1 0 -22 -4.9 6.8
 -1 0 -22 4.5 3.8
 -1 0 -22 -1.7 2.6
 2 0 22 -7.2 5.7
 2 0 22 -0.6 10.3
 2 0 22 8.6 3.8
 2 0 22 2.9 3.7
 -2 0 -22 0.9 7.7
 -2 0 -22 5.2 3.9
 -2 0 -22 8.4 10.1
 -2 0 -22 3.3 3.2
 3 0 22 3.6 12.1
 3 0 22 3.2 4.4
 3 0 22 -12.7 5.9
 3 0 22 3.3 3.7
 -3 0 -22 -0.3 4.3
 -3 0 -22 -8.8 6.3
 -3 0 -22 1.1 7.8
 4 0 22 -13 5.8
 4 0 22 -9.3 9.1
 -4 0 -22 -2 4.7
 -4 0 -22 -8.2 6.9
 -4 0 -22 3.8 8.5
 5 0 22 -10.3 9
 5 0 22 0.1 6.9
 -5 0 -22 1.2 7.5
 -5 0 -22 -6.8 5.4
 -5 0 -22 8.4 8.7
 6 0 22 16.5 11.3
 6 0 22 -1.7 7.1
 -6 0 -22 15.8 7.8
 -6 0 -22 18.1 9.3
 -6 0 -22 1.7 9.1
 -6 0 -22 7.7 9.1
 7 0 22 3.3 7.8
 7 0 22 24.6 11.9
 7 0 22 3.7 3.7
 -7 0 -22 -1.2 8.3
 -7 0 -22 -6.2 5.5
 -7 0 -22 -2.3 6.7
 -7 0 -22 -6.4 6.2
 -7 0 -22 11.7 11.9
 -7 0 -22 11.4 8.6
 8 0 22 209.38 21
 8 0 22 267.77 26.4
 -8 0 -22 244.88 27.2
 -8 0 -22 239.78 22.6
 -8 0 -22 205.78 20.7
 -8 0 -22 220.98 22.6
 9 0 22 6.2 7.8
 9 0 22 12.1 11
 -9 0 -22 0.1 4.7
 -9 0 -22 4.4 5.7
 -9 0 -22 -12.3 9
 -9 0 -22 -4.2 11.8
 -9 0 -22 12.5 9.1
 10 0 22 73.89 14.9
 10 0 22 86.09 17.6
 -10 0 -22 82.99 18.9
 -10 0 -22 62.89 14.5
 -10 0 -22 56.79 14.2
 -10 0 -22 56.09 18.1
 -9 0 23 15.2 9.1
 -9 0 23 12.8 8.5
 -9 0 23 1.5 6.6
 9 0 -23 12 7.6
 9 0 -23 10.6 9
 9 0 -23 15.4 7
 -8 0 23 -1.1 7.3
 -8 0 23 -0.1 6.4
 -8 0 23 3.4 6.3
 -8 0 23 14.2 9.1
 -8 0 23 -3.8 7.3
 8 0 -23 7.2 8.1
 8 0 -23 3.1 9.5
 8 0 -23 6.2 6.6
 -7 0 23 91.49 14.2
 -7 0 23 100.19 14.2
 -7 0 23 79.09 13.9
 7 0 -23 84.59 13
 7 0 -23 98.19 15
 7 0 -23 110.19 17.2
 -6 0 23 1.6 3.9
 -6 0 23 5.5 5.8
 -6 0 23 -9 6.2
 -6 0 23 -4.1 7.4
 -6 0 23 -8.1 3.1
 -6 0 23 1.7 7.1
 6 0 -23 -4.7 7.3
 6 0 -23 7.7 7.4
 6 0 -23 13.9 8.1
 6 0 -23 19.6 9.7
 -5 0 23 200.88 18.5
 -5 0 23 167.38 14.1
 -5 0 23 179.38 16
 -5 0 23 210.18 21.2
 -5 0 23 196.88 19.3
 -5 0 23 194.58 19.7
 -5 0 23 198.18 14.8
 5 0 -23 195.38 21.8
 5 0 -23 256.57 22.5
 -4 0 23 2.1 8.1
 -4 0 23 -1.3 4.9
 -4 0 23 -2.5 5.9
 -4 0 23 -0.3 6.9
 -4 0 23 -7.3 4.3
 -4 0 23 5.7 8.4
 4 0 -23 8 8.4
 4 0 -23 -2.3 7.2
 -3 0 23 70.99 12.5
 -3 0 23 72.89 10
 -3 0 23 76.29 11.2
 -3 0 23 53.09 13.3
 -3 0 23 76.99 12.9
 3 0 -23 47.1 12.3
 3 0 -23 67.69 14.8
 3 0 -23 69.39 13.6
 -2 0 23 0.2 5.5
 -2 0 23 1.4 6.9
 -2 0 23 7.8 9.9
 -2 0 23 -7.2 4.9
 2 0 -23 -2.5 9
 2 0 -23 0 6.9
 -1 0 23 21.6 6.5
 -1 0 23 7.9 10.2
 -1 0 23 16.2 12.7
 -1 0 23 32.8 9.3
 1 0 -23 18.3 6.8
 1 0 -23 11.5 8.7
 1 0 -23 24.7 11
 0 0 23 -12.4 5.7
 0 0 23 8.9 4.7
 0 0 23 5.2 9.8
 0 0 23 3.1 2.1
 0 0 23 1.8 6.4
 0 0 -23 5.2 8.5
 0 0 -23 5.2 8.7
 0 0 -23 13.8 5.3
 1 0 23 33.6 12
 1 0 23 31.9 6
 1 0 23 30.4 9
 -1 0 -23 30.1 12.4
 -1 0 -23 33.1 6.4
 -1 0 -23 17.4 10.4
 2 0 23 -4.7 6
 2 0 23 2.2 3.9
 2 0 23 3.1 3.3
 -2 0 -23 1.5 8
 -2 0 -23 3.5 3.2
 -2 0 -23 2.1 7.9
 -2 0 -23 -1 3.3
 3 0 23 56.39 14.6
 3 0 23 67.09 12.1
 3 0 23 49.99 7.3
 -3 0 -23 38.4 7.1
 -3 0 -23 25.5 11.1
 -3 0 -23 52.99 13.4
 4 0 23 -5.4 6.9
 4 0 23 3.9 4.8
 4 0 23 17.6 11.3
 4 0 23 1.1 3
 -4 0 -23 -6 4.8
 -4 0 -23 -1.2 8.5
 -4 0 -23 -5.3 6.3
 5 0 23 63.99 12.1
 5 0 23 72.19 17.1
 -5 0 -23 62.89 14.1
 -5 0 -23 57.69 13
 -5 0 -23 50.79 13.6
 -5 0 -23 53.89 10.1
 6 0 23 1.1 7.8
 6 0 23 -3.7 9.9
 -6 0 -23 6.4 9.1
 -6 0 -23 15.9 8.5
 -6 0 -23 15.5 7.4
 -6 0 -23 1.2 10
 7 0 23 6.6 11.2
 7 0 23 19.4 8.6
 -7 0 -23 7.5 7.7
 -7 0 -23 -9.8 7.7
 -7 0 -23 4.5 8.3
 -7 0 -23 13.5 10.2
 -7 0 -23 -8.1 7.7
 8 0 23 -2.3 6.9
 8 0 23 27.7 12.2
 -8 0 -23 8.7 10.9
 -8 0 -23 11.7 10.6
 -8 0 -23 1.4 7.7
 -8 0 -23 4 8.2
 -8 0 -23 14.6 8.9
 9 0 23 12.5 10.4
 9 0 23 26.8 14.6
 -9 0 -23 14.6 10.6
 -9 0 -23 37.9 15.5
 -9 0 -23 7.7 6.4
 -9 0 -23 10.4 9.1
 -9 0 -23 11.8 8.7
 -8 0 24 97.69 13.2
 -8 0 24 111.89 16.3
 -8 0 24 92.29 15.1
 8 0 -24 90.49 16.3
 8 0 -24 86.99 13.5
 8 0 -24 109.89 16.4
 -7 0 24 0.9 4.9
 -7 0 24 4.1 8
 -7 0 24 -4.5 7.5
 -7 0 24 14 7.2
 -7 0 24 6.5 7.6
 7 0 -24 -8.2 9.1
 7 0 -24 1.7 7.7
 7 0 -24 6.2 7.2
 -6 0 24 58.39 11.6
 -6 0 24 66.79 13
 -6 0 24 65.59 12.3
 -6 0 24 45.1 9.1
 6 0 -24 40.2 12.6
 6 0 -24 76.59 14.2
 6 0 -24 62.59 12
 -5 0 24 -3 4.2
 -5 0 24 -5.5 5.8
 -5 0 24 25.3 9.7
 -5 0 24 -2.8 4.9
 -5 0 24 -8.3 7
 -5 0 24 -1.9 7.6
 -5 0 24 5.7 8
 5 0 -24 -0.3 7.4
 5 0 -24 4.2 9.4
 5 0 -24 8.3 9.8
 -4 0 24 245.88 24.6
 -4 0 24 251.07 22.4
 -4 0 24 226.28 18.7
 -4 0 24 266.97 22.8
 -4 0 24 261.17 21.1
 4 0 -24 307.87 25.6
 4 0 -24 292.27 26.7
 -3 0 24 2.8 5.8
 -3 0 24 -8.6 5.1
 -3 0 24 10 9.2
 -3 0 24 0.8 7.6
 -3 0 24 22.5 10.4
 3 0 -24 1.6 7.5
 3 0 -24 5.1 9.1
 -2 0 24 177.48 18
 -2 0 24 171.88 16.1
 -2 0 24 163.88 15.5
 -2 0 24 176.88 22.9
 2 0 -24 195.18 22.2
 2 0 -24 156.78 21.2
 -1 0 24 -2.5 7.6
 -1 0 24 16.9 11.3
 -1 0 24 7.5 7.2
 -1 0 24 0.8 5.4
 1 0 -24 20 11.4
 1 0 -24 15.4 6.5
 1 0 -24 -11.7 7.8
 0 0 24 119.09 14.5
 0 0 24 75.89 16.4
 0 0 24 105.89 10.5
 0 0 24 73.49 5.8
 0 0 24 110.89 14.5
 0 0 -24 94.49 16.6
 0 0 -24 99.79 17.2
 0 0 -24 108.09 11.3
 1 0 24 7 12.1
 1 0 24 6.3 3.5
 1 0 24 11.5 4.8
 1 0 24 3.4 7.1
 -1 0 -24 7.3 9.3
 -1 0 -24 7.9 4.6
 -1 0 -24 -20.6 7.6
 2 0 24 122.39 10.8
 2 0 24 140.19 10.6
 2 0 24 131.29 16.4
 2 0 24 113.39 19.9
 -2 0 -24 116.39 18.2
 -2 0 -24 128.39 10.3
 -2 0 -24 164.08 20.5
 3 0 24 19.5 13.4
 3 0 24 5 3.6
 3 0 24 0.9 7.3
 3 0 24 1 3.9
 -3 0 -24 0 7.9
 -3 0 -24 -11.6 8.3
 -3 0 -24 0.6 4
 4 0 24 15.8 12.3
 4 0 24 18.7 8.6
 4 0 24 28.3 6.3
 4 0 24 17.8 5.7
 -4 0 -24 19.1 6.7
 -4 0 -24 32.4 12.7
 -4 0 -24 11.5 8.7
 5 0 24 11.8 11.4
 5 0 24 18.7 9.1
 5 0 24 -0.8 2.9
 -5 0 -24 -14.7 7.3
 -5 0 -24 2.7 5.6
 -5 0 -24 8.9 10.1
 -5 0 -24 8.6 9.3
 6 0 24 395.76 29.7
 6 0 24 417.26 35.4
 -6 0 -24 367.16 27.3
 -6 0 -24 344.77 32.6
 -6 0 -24 352.86 32.4
 -6 0 -24 394.76 31.1
 7 0 24 5.6 11.4
 7 0 24 20.2 8.4
 -7 0 -24 4.5 7.4
 -7 0 -24 -8 9
 -7 0 -24 8.2 9.1
 -7 0 -24 17.9 9.5
 8 0 24 55.19 14.7
 8 0 24 28.7 13.9
 -8 0 -24 55.19 14.7
 -8 0 -24 47.9 14.1
 -8 0 -24 41.7 11.1
 -8 0 -24 68.59 13.1
 -7 0 25 7.5 8.3
 -7 0 25 -8.7 6.5
 -7 0 25 25.3 8.9
 -7 0 25 8 6.2
 7 0 -25 11 9.4
 7 0 -25 13.8 8.4
 -6 0 25 4.3 2.1
 -6 0 25 -4.4 7.5
 -6 0 25 8.2 7.3
 -6 0 25 -8.6 5.5
 -6 0 25 8.9 9
 -6 0 25 8 6.4
 6 0 -25 4.4 7.2
 6 0 -25 0.1 7.9
 6 0 -25 -2.2 8.8
 -5 0 25 60.69 12.4
 -5 0 25 53.49 11.5
 -5 0 25 48.1 8.9
 -5 0 25 45.9 7.3
 -5 0 25 18.6 8.3
 -5 0 25 55.09 10.9
 5 0 -25 39.5 11.5
 5 0 -25 50.09 13
 -4 0 25 4.2 6.2
 -4 0 25 1.2 8.1
 -4 0 25 -3.1 8
 -4 0 25 10.4 10.5
 4 0 -25 1.8 9.5
 4 0 -25 8.2 8.1
 -3 0 25 14.8 6.8
 -3 0 25 15.7 9.2
 -3 0 25 20.6 9.7
 -3 0 25 14.6 7
 -3 0 25 22.3 10.8
 3 0 -25 15.6 10.2
 3 0 -25 5.3 9.1
 -2 0 25 2.3 8
 -2 0 25 8.1 10.7
 -2 0 25 1 5.9
 -2 0 25 -0.8 5.2
 -2 0 25 6.7 8.3
 2 0 -25 0.8 7.9
 2 0 -25 9.6 10.5
 -1 0 25 25.3 12.5
 -1 0 25 10.7 5.9
 -1 0 25 1.5 7.1
 -1 0 25 8.8 8.3
 1 0 -25 6.7 9
 1 0 -25 19.3 11.2
 0 0 25 5.4 7.7
 0 0 25 13.2 8.2
 0 0 25 6.3 4.7
 0 0 25 -1.1 9.3
 0 0 -25 7.2 9.8
 0 0 -25 -5.7 8.5
 1 0 25 25.3 12.5
 1 0 25 28.1 9.3
 1 0 25 28.7 6.2
 1 0 25 36.6 9.8
 -1 0 -25 31.7 11.9
 -1 0 -25 47 13.8
 -1 0 -25 37.4 7
 2 0 25 -6.2 7.3
 2 0 25 4.8 3.6
 2 0 25 3 4
 2 0 25 10.7 10.8
 -2 0 -25 -4.7 2.3
 -2 0 -25 18 11.4
 -2 0 -25 3.3 7.8
 3 0 25 47.4 11.1
 3 0 25 40.9 6.5
 3 0 25 29.2 5.6
 3 0 25 20.9 12.5
 -3 0 -25 36.1 11.5
 -3 0 -25 52.89 13.9
 4 0 25 8.6 8.1
 4 0 25 15 12.7
 -4 0 -25 9.3 9.2
 -4 0 -25 -3.9 9
 -4 0 -25 -3.4 7.7
 5 0 25 222.38 21.9
 5 0 25 215.38 14.3
 5 0 25 277.47 29
 -5 0 -25 244.38 24.4
 -5 0 -25 232.88 25.1
 -5 0 -25 207.98 18
 -5 0 -25 239.78 23.9
 6 0 25 34.6 14.7
 6 0 25 7 8.2
 6 0 25 4.8 3.3
 -6 0 -25 10 9.9
 -6 0 -25 0 6.3
 -6 0 -25 1.8 10
 -6 0 -25 -1.3 10.1
 -6 0 -25 1.9 9
 7 0 25 243.78 34.2
 -7 0 -25 176.38 25.2
 -7 0 -25 217.98 23
 -7 0 -25 222.58 24.6
 -7 0 -25 211.48 22.8
 -6 0 26 30.1 8.1
 -6 0 26 42.1 9.6
 -6 0 26 25.1 9.6
 -6 0 26 1.8 7.1
 6 0 -26 24.7 11.9
 6 0 -26 8.4 12.4
 -5 0 26 -1.7 4.5
 -5 0 26 -3.7 7.2
 -5 0 26 8.7 6.8
 -5 0 26 13 6.5
 -5 0 26 11.2 5.6
 -5 0 26 -3.6 8
 5 0 -26 -4.8 8.7
 5 0 -26 -1.7 9.8
 -4 0 26 1.7 10
 -4 0 26 -4.4 8.4
 -4 0 26 -4.8 5.6
 -4 0 26 -1.6 8.1
 -4 0 26 -10.5 5.3
 -4 0 26 8.1 6.6
 4 0 -26 -25.1 8.7
 4 0 -26 -4.6 7.6
 -3 0 26 2.1 6.5
 -3 0 26 -3.1 8.4
 -3 0 26 3.1 8.2
 -3 0 26 8.3 8.7
 -3 0 26 0.1 5.7
 3 0 -26 -1.6 9.3
 3 0 -26 2.3 8.5
 -2 0 26 98.19 23.6
 -2 0 26 101.59 15.6
 -2 0 26 111.19 15.6
 -2 0 26 104.39 13.4
 -2 0 26 86.39 12.1
 2 0 -26 141.29 19.5
 2 0 -26 105.59 18.4
 -1 0 26 1.4 7
 -1 0 26 -15.2 6.9
 -1 0 26 10.9 5.6
 -1 0 26 13.7 11.7
 1 0 -26 20.8 11.9
 1 0 -26 -1.7 8.2
 0 0 26 158.28 23.4
 0 0 26 184.08 18.5
 0 0 26 146.09 13.6
 0 0 26 130.09 16.6
 0 0 -26 183.48 22.6
 0 0 -26 141.29 20.9
 1 0 26 -6.1 7.6
 1 0 26 9.7 8.7
 1 0 26 -0.7 1.8
 1 0 26 1.6 4.8
 1 0 26 15.7 9.6
 -1 0 -26 9.2 9.4
 -1 0 -26 5 10.6
 2 0 26 238.98 26.9
 2 0 26 210.08 15.7
 2 0 26 259.77 21.7
 -2 0 -26 208.48 25.6
 -2 0 -26 224.28 24.8
 3 0 26 3.3 8.5
 3 0 26 3.3 3.6
 3 0 26 16.9 10.6
 -3 0 -26 30.9 10.1
 -3 0 -26 8.1 8.5
 4 0 26 143.99 11
 4 0 26 149.49 22.7
 4 0 26 143.79 18.6
 -4 0 -26 156.58 21.5
 -4 0 -26 116.39 19.5
 -4 0 -26 138.59 20.7
 5 0 26 28.4 10.4
 5 0 26 23.4 12.2
 -5 0 -26 3.2 11.1
 -5 0 -26 9.4 9
 -5 0 -26 20.1 10.6
 6 0 26 25.1 16.3
 -6 0 -26 64.09 14.3
 -6 0 -26 33.5 13.6
 -6 0 -26 67.39 13.7
 -6 0 -26 35.4 14
 -5 0 27 10.9 8.9
 -5 0 27 0 5.8
 -5 0 27 -7.4 5.7
 -5 0 27 -3.5 7.1
 -5 0 27 -2.6 5.8
 -5 0 27 4.2 12.3
 5 0 -27 -19.5 10.2
 5 0 -27 4 9.5
 -4 0 27 -3.9 5.2
 -4 0 27 -10.1 9
 -4 0 27 14 7.5
 -4 0 27 -4.9 5.4
 -4 0 27 -1 8
 4 0 -27 13.9 10.5
 -3 0 27 2.7 11.7
 -3 0 27 26.9 7.6
 -3 0 27 26.7 8.2
 -3 0 27 20.9 9.7
 -3 0 27 27.9 9.8
 3 0 -27 28.6 12.6
 3 0 -27 10.2 10.3
 -2 0 27 1.5 7
 -2 0 27 1.4 8.4
 -2 0 27 -0.1 4.8
 -2 0 27 0 8.3
 -2 0 27 7.2 11
 2 0 -27 -1.9 10.2
 2 0 -27 8.4 9
 -1 0 27 145.49 16.1
 -1 0 27 177.48 24.4
 -1 0 27 162.48 14.7
 -1 0 27 171.58 18.6
 1 0 -27 178.58 23.3
 1 0 -27 169.78 23
 0 0 27 19.4 9.7
 0 0 27 5.8 5.1
 0 0 27 -0.3 7
 0 0 27 0 10.8
 0 0 -27 13.6 8.9
 0 0 -27 26.9 12.1
 1 0 27 26.8 10.6
 1 0 27 9.8 5
 1 0 27 30.5 9.8
 1 0 27 31.9 14.7
 -1 0 -27 30.5 13.6
 -1 0 -27 30.9 10.2
 2 0 27 4.6 10.1
 2 0 27 2.2 3.9
 2 0 27 13.2 8.8
 2 0 27 -1.9 8.2
 -2 0 -27 1.8 8.3
 -2 0 -27 16.4 11.1
 3 0 27 17.4 9.2
 3 0 27 10 4.7
 3 0 27 -3.2 11.7
 -3 0 -27 13.5 11.6
 -3 0 -27 7.9 9.6
 4 0 27 19.7 12.5
 -4 0 -27 7.7 9.6
 -4 0 -27 17.2 10.5
 -4 0 -27 23.5 11.4
 5 0 27 14.5 11.4
 5 0 27 26 10.1
 -5 0 -27 18.7 12
 -5 0 -27 7.2 9
 -4 0 28 10.9 6.5
 -4 0 28 6.4 9
 -4 0 28 1.3 6
 -4 0 28 7 9.3
 -4 0 28 9 6.2
 -4 0 28 -0.5 8.8
 4 0 -28 6 8.8
 4 0 -28 33 13.5
 -3 0 28 12.9 12.3
 -3 0 28 -1.8 6.2
 -3 0 28 5.5 6.5
 -3 0 28 0.5 8.2
 3 0 -28 -5.9 10.2
 3 0 -28 19.7 10.4
 -2 0 28 110.59 20.3
 -2 0 28 104.99 18.9
 -2 0 28 100.59 14
 -2 0 28 93.09 16.1
 -2 0 28 114.49 14.3
 2 0 -28 97.99 26
 -1 0 28 6.2 7.6
 -1 0 28 2.1 11.3
 -1 0 28 -3.8 5
 1 0 -28 11.1 11
 0 0 28 36.6 7.6
 0 0 28 76.79 17.6
 0 0 28 43.1 10.3
 0 0 -28 64.29 15.7
 1 0 28 25.4 14.6
 1 0 28 -3.2 8
 1 0 28 -1.1 4.3
 -1 0 -28 11 10.9
 2 0 28 2.5 3.9
 2 0 28 6.3 12.1
 2 0 28 -5.9 13
 -2 0 -28 3.2 9.1
 3 0 28 26 14.3
 3 0 28 7.3 9.2
 -3 0 -28 8.3 11.2
 -3 0 -28 -12.5 8.9
 -3 0 -28 17.7 11.3
 4 0 28 39 11.4
 4 0 28 35.5 15.4
 -4 0 -28 54.99 13.6
 -4 0 -28 55.39 14.2
 -4 0 -28 32.2 11
 -1 0 29 15 10.9
 -1 0 29 1.6 11
 -1 0 29 6.9 9.1
 -1 0 29 7 10.2
 -1 0 29 22 6
 1 0 -29 27.1 11.3
 1 0 -29 -5.8 11.9
 0 0 29 18.9 12
 0 0 29 28.8 13.4
 0 0 29 4 8.8
 0 0 -29 -6.2 10.1
 0 0 -29 3.8 10.6
 1 0 29 11.8 10.5
 1 0 29 18.9 8.4
 1 0 29 0.8 12.2
 -1 0 -29 35.2 14.1
 -1 0 -29 9.7 10.2
 -1 1 -29 78.09 18
 -1 1 -29 91.59 17.9
 1 -1 29 68.69 18.8
 1 -1 29 71.69 12.9
 1 -1 29 93.09 15.5
 0 1 -29 147.79 22
 0 1 -29 137.79 20.8
 0 -1 29 111.79 17.2
 0 -1 29 98.89 20
 0 -1 29 104.19 17
 1 1 -29 52.59 13.8
 1 1 -29 33.1 14.5
 -1 -1 29 27.6 6.9
 -1 -1 29 14.5 10.5
 -1 -1 29 50.69 15.8
 -1 -1 29 21.1 10.2
 -1 -1 29 26.9 11.4
 -4 1 -28 121.49 18.4
 -4 1 -28 134.39 20.8
 -4 1 -28 111.89 18.6
 4 -1 28 156.98 24.2
 4 -1 28 129.69 18.3
 -3 1 -28 19 11.6
 -3 1 -28 6.2 11.6
 -3 1 -28 9.3 9.1
 3 -1 28 16.9 10
 3 -1 28 15.2 10
 3 -1 28 29.9 15.6
 -2 1 -28 27.3 11.7
 2 -1 28 32.6 13.9
 2 -1 28 15.6 14.4
 -1 1 -28 35.3 11.6
 1 -1 28 7.6 4.4
 1 -1 28 8.6 8.3
 1 -1 28 0.5 13
 0 1 -28 145.09 21.4
 0 -1 28 145.09 17.2
 0 -1 28 96.99 19.7
 0 -1 28 122.09 11.7
 1 1 -28 13.4 11.1
 -1 -1 28 20.5 8.1
 -1 -1 28 13.9 5.8
 -1 -1 28 -0.6 10.9
 2 1 -28 -2.8 13.3
 -2 -1 28 16.5 12.6
 -2 -1 28 11.3 6
 -2 -1 28 5.7 7.2
 -2 -1 28 27.6 10.6
 -2 -1 28 1.2 10.9
 3 1 -28 140.69 24.4
 3 1 -28 169.98 22.3
 -3 -1 28 172.78 20.1
 -3 -1 28 178.18 24.6
 -3 -1 28 132.49 15.3
 -3 -1 28 154.38 27.4
 -3 -1 28 137.89 14.7
 4 1 -28 20.5 10.4
 4 1 -28 -11 10
 -4 -1 28 -7.2 8.4
 -4 -1 28 -2.8 7.8
 -4 -1 28 5 6.1
 -4 -1 28 3.1 6.2
 -4 -1 28 10.8 8.4
 -4 -1 28 -8.5 6.1
 -5 1 -27 68.29 15.9
 -5 1 -27 74.19 15.3
 -5 1 -27 86.99 16.3
 5 -1 27 93.59 21
 5 -1 27 100.89 15.7
 -4 1 -27 60.99 14.6
 -4 1 -27 34.3 13.3
 -4 1 -27 49.4 12.5
 4 -1 27 52.29 15.3
 -3 1 -27 2.5 10.9
 -3 1 -27 28 10.9
 -3 1 -27 10 9.4
 3 -1 27 6.6 3.7
 3 -1 27 1.9 11.4
 3 -1 27 13 8.4
 -2 1 -27 35.5 12.3
 -2 1 -27 55.59 14.3
 2 -1 27 46.3 7.2
 2 -1 27 38.1 14.3
 2 -1 27 59.09 12.8
 2 -1 27 60.69 13.1
 -1 1 -27 11.6 11.6
 -1 1 -27 12.4 8.8
 1 -1 27 -0.2 8.8
 1 -1 27 14.6 11.6
 1 -1 27 14.5 8.2
 1 -1 27 7.5 4.6
 0 1 -27 13.9 9.6
 0 1 -27 29.3 12.9
 0 -1 27 23.2 12.6
 0 -1 27 23.3 5.9
 0 -1 27 21.7 9.1
 0 -1 27 19.6 9.9
 1 1 -27 39.4 12.5
 1 1 -27 10.2 9.6
 -1 -1 27 19.8 11.7
 -1 -1 27 12.8 9.1
 -1 -1 27 22.2 6.4
 -1 -1 27 9.3 7.2
 2 1 -27 6.2 9
 2 1 -27 17.1 11.4
 -2 -1 27 8.8 7.7
 -2 -1 27 22.2 10.4
 -2 -1 27 17.1 6.2
 -2 -1 27 30.1 12.6
 -2 -1 27 16.6 9.5
 3 1 -27 140.39 20.6
 3 1 -27 168.38 22.8
 -3 -1 27 136.59 18.6
 -3 -1 27 131.09 17.8
 -3 -1 27 128.49 14.8
 -3 -1 27 156.78 17.1
 -3 -1 27 145.19 23.9
 4 1 -27 27.9 12.6
 -4 -1 27 29 7.4
 -4 -1 27 27.4 12.3
 -4 -1 27 6.4 7
 -4 -1 27 29.5 8.5
 -4 -1 27 35.2 10.8
 5 1 -27 -0.6 11.4
 5 1 -27 1.4 9.9
 -5 -1 27 11.2 9.4
 -5 -1 27 -1.1 5.8
 -5 -1 27 -8.1 6.6
 -5 -1 27 3.7 7.1
 -6 1 -26 257.27 25
 -6 1 -26 239.48 26.5
 -6 1 -26 248.78 25.4
 -6 1 -26 194.68 25.8
 6 -1 26 208.98 33.1
 6 -1 26 280.27 24.2
 -5 1 -26 141.79 20.9
 -5 1 -26 153.58 21.6
 -5 1 -26 192.18 21.2
 5 -1 26 209.58 26.9
 5 -1 26 213.98 20.8
 -4 1 -26 -7.1 8.3
 -4 1 -26 3.9 9.4
 -4 1 -26 -0.4 9.5
 4 -1 26 11.7 12.4
 4 -1 26 4.1 2.5
 4 -1 26 11.1 8.9
 -3 1 -26 35.7 10.6
 -3 1 -26 59.79 13
 -3 1 -26 51.59 12.7
 3 -1 26 34.2 11.1
 3 -1 26 31.5 5.1
 3 -1 26 59.29 14.9
 -2 1 -26 132.29 20.3
 -2 1 -26 132.99 20.8
 2 -1 26 126.29 16.7
 2 -1 26 152.58 16.7
 2 -1 26 122.09 21.6
 2 -1 26 123.99 11.2
 -1 1 -26 17.6 10.6
 -1 1 -26 2.6 10
 1 -1 26 -14.8 6.7
 1 -1 26 5.7 8.8
 1 -1 26 17.2 11.1
 1 -1 26 8.1 4.8
 0 1 -26 734.33 51.09
 0 1 -26 744.03 50.79
 0 -1 26 769.92 47.2
 0 -1 26 728.83 46.3
 0 -1 26 716.43 42.8
 0 -1 26 715.03 52.39
 1 1 -26 244.78 24.6
 1 1 -26 217.48 24.6
 -1 -1 26 215.08 26.5
 -1 -1 26 214.28 17
 -1 -1 26 212.38 19.7
 -1 -1 26 209.38 20.4
 2 1 -26 30.1 11.8
 2 1 -26 22.4 11.7
 -2 -1 26 17.9 9.9
 -2 -1 26 4.6 8.6
 -2 -1 26 12.7 7.3
 -2 -1 26 10.3 6.1
 -2 -1 26 30.7 13.7
 3 1 -26 121.19 18.4
 3 1 -26 65.59 15.4
 -3 -1 26 75.79 11
 -3 -1 26 52.49 9.9
 -3 -1 26 82.79 14.4
 -3 -1 26 98.29 15
 -3 -1 26 72.79 15.1
 4 1 -26 -10.8 9
 4 1 -26 -4.6 8.8
 -4 -1 26 -0.7 8.8
 -4 -1 26 1.2 6.7
 -4 -1 26 -4.6 7.6
 -4 -1 26 -2.5 5.5
 -4 -1 26 9.7 9.9
 5 1 -26 38.5 12.2
 5 1 -26 17.4 12
 -5 -1 26 24.1 8.4
 -5 -1 26 9.4 6.7
 -5 -1 26 28 10.5
 -5 -1 26 11.8 9.4
 -5 -1 26 16 5.5
 -5 -1 26 7 5.5
 6 1 -26 -6.1 7.8
 6 1 -26 0.1 10.8
 -6 -1 26 0.7 6.6
 -6 -1 26 0.5 2.5
 -6 -1 26 -2.8 6.8
 -6 -1 26 8.1 6.7
 -6 -1 26 -3.1 8.4
 -6 -1 26 5.5 8.1
 -7 1 -25 25.5 11.8
 -7 1 -25 1.4 9.9
 -7 1 -25 -0.8 9
 -7 1 -25 14.4 8.8
 7 -1 25 4.1 11.3
 -6 1 -25 63.49 14.4
 -6 1 -25 64.49 14.2
 -6 1 -25 33 13.9
 -6 1 -25 69.49 15.2
 6 -1 25 102.59 20.6
 6 -1 25 88.89 14.2
 -5 1 -25 20 11
 -5 1 -25 30.7 10.7
 -5 1 -25 6.4 10.3
 5 -1 25 18.3 2.8
 5 -1 25 21.6 9.6
 5 -1 25 4.8 11.2
 -4 1 -25 32 11
 -4 1 -25 31.5 11.8
 -4 1 -25 53.29 14.4
 4 -1 25 56.69 16.5
 4 -1 25 39.6 4.8
 4 -1 25 24.9 9.2
 -3 1 -25 15.5 9.7
 -3 1 -25 -11.2 8.8
 3 -1 25 7.1 8.8
 3 -1 25 1.2 3.1
 3 -1 25 -3.3 11.4
 3 -1 25 9.6 5
 -2 1 -25 97.89 18.3
 -2 1 -25 105.79 17.1
 2 -1 25 99.49 14.7
 2 -1 25 119.49 19.5
 2 -1 25 98.09 10
 2 -1 25 111.59 10
 -1 1 -25 237.88 17.5
 -1 1 -25 194.08 24.6
 -1 1 -25 241.28 25.5
 1 -1 25 207.78 15.8
 1 -1 25 216.48 16.4
 1 -1 25 239.78 21
 1 -1 25 207.18 26.9
 1 -1 25 248.38 21.2
 0 1 -25 43.4 12.5
 0 1 -25 28.1 11.6
 0 1 -25 40.7 10.4
 0 -1 25 26.7 6.3
 0 -1 25 31.7 9.6
 0 -1 25 38.5 10.5
 0 -1 25 50.99 13.9
 1 1 -25 3 9.9
 1 1 -25 8.9 9.2
 -1 -1 25 6.2 7
 -1 -1 25 6.6 10.5
 -1 -1 25 6.4 5.3
 -1 -1 25 2.2 7.9
 2 1 -25 18.3 9.6
 2 1 -25 -5.2 9
 -2 -1 25 -4.6 9.3
 -2 -1 25 7.8 6.5
 -2 -1 25 -1.6 5.1
 -2 -1 25 -2.3 7.2
 -2 -1 25 11.4 8.7
 3 1 -25 29.4 12.2
 3 1 -25 17.3 10.4
 -3 -1 25 15.4 6.8
 -3 -1 25 30.2 10.4
 -3 -1 25 24.3 7.8
 -3 -1 25 25.2 9.9
 -3 -1 25 17.4 10.3
 4 1 -25 87.89 15.2
 4 1 -25 88.49 16.4
 -4 -1 25 64.49 15
 -4 -1 25 67.09 11.1
 -4 -1 25 61.39 12.4
 -4 -1 25 90.39 14.4
 5 1 -25 -8.6 7
 5 1 -25 8.9 9.5
 -5 -1 25 5.4 6.9
 -5 -1 25 3.2 8
 -5 -1 25 6.4 8.4
 -5 -1 25 0.1 4.6
 -5 -1 25 -2.9 6.2
 -5 -1 25 11.5 7.6
 6 1 -25 71.29 14.5
 6 1 -25 69.39 15.1
 -6 -1 25 59.29 10.2
 -6 -1 25 64.59 12.9
 -6 -1 25 84.19 13.4
 -6 -1 25 65.79 13.3
 7 1 -25 16 9.6
 -7 -1 25 -3.1 6.9
 -7 -1 25 22 9
 -7 -1 25 7.8 8.2
 -7 -1 25 11.2 7.8
 -8 1 -24 18 10
 -8 1 -24 15.8 8.8
 -8 1 -24 8.8 11.6
 -8 1 -24 -1.9 10.8
 8 -1 24 24.5 13.3
 -7 1 -24 119.99 19.7
 -7 1 -24 166.78 22.9
 -7 1 -24 144.39 18.5
 7 -1 24 114.49 20.8
 7 -1 24 130.39 17.2
 -6 1 -24 10.8 9.2
 -6 1 -24 29.6 10.4
 -6 1 -24 9.3 9.8
 -6 1 -24 13.8 7.4
 6 -1 24 8.4 2.3
 6 -1 24 21.4 11.9
 6 -1 24 3.7 8.6
 -5 1 -24 180.58 22.7
 -5 1 -24 161.08 20.7
 -5 1 -24 191.58 20.9
 5 -1 24 152.78 18.7
 5 -1 24 148.29 22.9
 5 -1 24 160.28 10.7
 -4 1 -24 151.58 20.4
 -4 1 -24 151.38 21.3
 -4 1 -24 171.88 20.9
 4 -1 24 186.08 25.3
 4 -1 24 162.68 13.5
 4 -1 24 147.99 10.8
 4 -1 24 148.69 18.1
 -3 1 -24 99.69 17.1
 -3 1 -24 89.39 15.8
 3 -1 24 90.79 9.3
 3 -1 24 80.19 13.2
 3 -1 24 108.09 20.3
 3 -1 24 80.89 7.7
 -2 1 -24 0.4 9.2
 -2 1 -24 9.1 9.3
 2 -1 24 18.5 4.6
 2 -1 24 9.1 11.4
 2 -1 24 3 7.2
 -1 1 -24 171.08 21.2
 -1 1 -24 159.08 13.7
 -1 1 -24 143.69 21.3
 1 -1 24 142.99 11.1
 1 -1 24 168.78 17
 1 -1 24 136.89 24.7
 1 -1 24 165.78 17.2
 1 -1 24 156.28 12.3
 0 1 -24 3.8 8.7
 0 1 -24 -3.1 7.9
 0 1 -24 18.8 6.2
 0 -1 24 -11.5 8.1
 0 -1 24 4.4 2.6
 0 -1 24 1.1 7.6
 0 -1 24 9.9 5.1
 0 -1 24 2.4 7.3
 1 1 -24 152.98 15.2
 1 1 -24 142.99 20
 1 1 -24 191.78 23.5
 -1 -1 24 187.78 17.7
 -1 -1 24 161.58 16.6
 -1 -1 24 161.68 14.1
 -1 -1 24 147.39 22
 2 1 -24 124.99 19.4
 2 1 -24 104.49 16.9
 -2 -1 24 135.39 20.1
 -2 -1 24 131.89 14.9
 -2 -1 24 161.28 16.7
 -2 -1 24 125.19 13.2
 3 1 -24 49.6 13.3
 3 1 -24 41 11.7
 -3 -1 24 52.49 11.7
 -3 -1 24 41.8 9
 -3 -1 24 32.8 9.7
 -3 -1 24 52.59 11.5
 -3 -1 24 48.7 13
 4 1 -24 23.4 11.3
 4 1 -24 22.3 10.1
 -4 -1 24 14.4 9.1
 -4 -1 24 23.5 8
 -4 -1 24 19 9.4
 -4 -1 24 25.3 6.8
 -4 -1 24 17.6 10.1
 5 1 -24 -0.7 9.3
 5 1 -24 6.4 9.1
 -5 -1 24 15.7 9.3
 -5 -1 24 -3.3 5.5
 -5 -1 24 -8 7.2
 -5 -1 24 2.1 4.6
 -5 -1 24 1.1 7.2
 -5 -1 24 7.8 8.8
 6 1 -24 22.6 10.4
 6 1 -24 36 11.6
 -6 -1 24 32.9 10.6
 -6 -1 24 29 9.6
 -6 -1 24 17.7 8.2
 -6 -1 24 27.5 10.5
 7 1 -24 40.8 11
 7 1 -24 45.4 13.7
 7 1 -24 64.99 11.8
 -7 -1 24 58.59 13.3
 -7 -1 24 49.3 9.5
 -7 -1 24 42.2 11.6
 -7 -1 24 45.7 11
 8 1 -24 11.3 9.6
 8 1 -24 14.2 7
 8 1 -24 10.6 8.3
 -8 -1 24 -1 7.5
 -8 -1 24 7 7
 -8 -1 24 12.1 8.3
 -9 1 -23 10 11
 -9 1 -23 13.6 20.1
 -9 1 -23 9.4 6.6
 -9 1 -23 13.9 12.1
 9 -1 23 23.6 11
 9 -1 23 22.3 13.8
 -8 1 -23 32.7 9.8
 -8 1 -23 20.9 8.6
 -8 1 -23 35.2 13.5
 -8 1 -23 18.1 8.2
 -8 1 -23 12.9 11.4
 8 -1 23 28.4 9.5
 8 -1 23 11.5 11.6
 -7 1 -23 11.7 11.4
 -7 1 -23 30.1 10.5
 -7 1 -23 34.6 12.3
 -7 1 -23 12.9 9.5
 7 -1 23 35.5 9.9
 7 -1 23 61.39 16.5
 -6 1 -23 72.19 11.9
 -6 1 -23 89.39 15
 -6 1 -23 90.49 15.2
 -6 1 -23 62.29 14.3
 6 -1 23 97.39 18.3
 6 -1 23 83.19 14.2
 6 -1 23 93.59 7.2
 -5 1 -23 35.4 12.1
 -5 1 -23 33.6 7.9
 -5 1 -23 39.3 11.6
 -5 1 -23 44.8 11.9
 5 -1 23 52.89 15.6
 5 -1 23 45.8 5
 5 -1 23 37.4 9.8
 -4 1 -23 173.58 21.4
 -4 1 -23 155.88 19.8
 -4 1 -23 145.49 14.1
 -4 1 -23 157.88 20.3
 4 -1 23 151.88 16.9
 4 -1 23 173.18 23.7
 4 -1 23 147.99 10.7
 4 -1 23 170.68 13.6
 -3 1 -23 11.3 9.3
 -3 1 -23 4 4.3
 -3 1 -23 1 7.8
 3 -1 23 8 3.5
 3 -1 23 18 4.9
 3 -1 23 8.3 7.2
 3 -1 23 11.2 10.6
 -2 1 -23 105.49 17.3
 -2 1 -23 97.79 17.3
 2 -1 23 98.09 13.5
 2 -1 23 101.59 9.1
 2 -1 23 87.79 9.9
 -1 1 -23 214.18 16.2
 -1 1 -23 217.48 22.4
 1 -1 23 220.48 14.3
 1 -1 23 212.28 23.9
 1 -1 23 207.78 15.2
 1 -1 23 206.88 18.8
 0 1 -23 82.59 16.1
 0 1 -23 88.69 15.5
 0 1 -23 72.69 10.3
 0 -1 23 74.49 12.1
 0 -1 23 75.69 15.5
 0 -1 23 64.59 11.5
 0 -1 23 69.49 8.8
 0 -1 23 82.89 6.9
 1 1 -23 33.1 7.8
 1 1 -23 8.6 8.6
 1 1 -23 16.1 10.6
 -1 -1 23 19.5 3.1
 -1 -1 23 22.4 12.1
 -1 -1 23 22.1 6.4
 -1 -1 23 23.1 8.8
 2 1 -23 59.39 14.2
 2 1 -23 67.39 10
 2 1 -23 80.09 14.2
 -2 -1 23 67.29 14.7
 -2 -1 23 66.99 10.2
 -2 -1 23 76.99 10.8
 -2 -1 23 64.09 11.6
 3 1 -23 62.59 14
 3 1 -23 94.89 15
 -3 -1 23 104.19 14.6
 -3 -1 23 92.89 11.3
 -3 -1 23 81.19 13.7
 -3 -1 23 93.19 12.1
 -3 -1 23 65.79 14.6
 4 1 -23 -9.6 6.2
 4 1 -23 -6.6 8.1
 -4 -1 23 -7.2 4.6
 -4 -1 23 -2.9 6.8
 -4 -1 23 12.1 6.5
 -4 -1 23 5.6 5.3
 -4 -1 23 3.4 8.1
 -4 -1 23 -7.2 8
 5 1 -23 108.79 17.6
 5 1 -23 81.39 14
 5 1 -23 103.39 16.2
 -5 -1 23 74.69 9
 -5 -1 23 120.29 16.7
 -5 -1 23 69.39 8.9
 -5 -1 23 86.99 11.1
 -5 -1 23 98.69 14.5
 -5 -1 23 97.49 13.4
 -5 -1 23 122.49 15.9
 6 1 -23 0.8 7.6
 6 1 -23 10.2 9.2
 -6 -1 23 4.2 3.2
 -6 -1 23 -8.5 3.2
 -6 -1 23 7.9 8.4
 -6 -1 23 13.4 8.1
 -6 -1 23 2.6 8.4
 -6 -1 23 1.1 3.6
 -6 -1 23 15.5 7.1
 7 1 -23 51.59 13.2
 7 1 -23 52.39 10.7
 7 1 -23 43.4 11.2
 -7 -1 23 58.39 12.6
 -7 -1 23 47.9 9.2
 -7 -1 23 55.79 12.6
 -7 -1 23 45 10.8
 8 1 -23 45.9 10.1
 8 1 -23 32.5 9.8
 8 1 -23 34.7 12.3
 -8 -1 23 31.7 10.4
 -8 -1 23 34.2 8.3
 -8 -1 23 48.6 12.5
 -8 -1 23 27.8 10.1
 9 1 -23 130.19 14.7
 9 1 -23 130.99 16.5
 9 1 -23 107.79 17.1
 -9 -1 23 132.29 18.6
 -9 -1 23 145.79 19.7
 -9 -1 23 151.58 22.5
 -9 -1 23 125.39 15.8
 -10 1 -22 11.3 8.9
 -10 1 -22 23.6 14
 -10 1 -22 5.6 11.1
 -10 1 -22 -3.3 9.3
 10 -1 22 5.4 11.2
 10 -1 22 19.5 8.9
 -9 1 -22 22.5 7.1
 -9 1 -22 10.1 8.9
 -9 1 -22 20.6 13.4
 -9 1 -22 17.1 11.1
 -9 1 -22 -7.6 9.5
 9 -1 22 21.2 12.1
 9 -1 22 16.8 8.5
 -8 1 -22 16.5 8
 -8 1 -22 -2.4 7
 -8 1 -22 8.7 10
 -8 1 -22 11.8 15.2
 8 -1 22 -3.2 6.8
 8 -1 22 12.8 10.7
 -7 1 -22 423.46 28.6
 -7 1 -22 437.76 34.5
 -7 1 -22 463.35 33.6
 -7 1 -22 436.16 33.3
 -7 1 -22 459.05 32.1
 -7 1 -22 485.75 37.4
 7 -1 22 445.46 32.4
 7 -1 22 433.46 26.3
 7 -1 22 475.15 38
 -6 1 -22 5 6.9
 -6 1 -22 2.2 9.4
 -6 1 -22 8.5 8.9
 -6 1 -22 -0.1 5.6
 -6 1 -22 6 8.1
 6 -1 22 10 8.3
 6 -1 22 11.2 3.4
 6 -1 22 -3.6 8.6
 -5 1 -22 11.3 10.8
 -5 1 -22 16 6.5
 -5 1 -22 13.1 8.4
 -5 1 -22 7.8 5.4
 -5 1 -22 19.4 9.8
 5 -1 22 9.7 7.7
 5 -1 22 38.7 13.1
 -4 1 -22 -6.7 7.4
 -4 1 -22 -2.1 7.3
 -4 1 -22 -0.1 4.5
 -4 1 -22 -0.2 8
 4 -1 22 3.2 10.2
 4 -1 22 11.2 4.7
 4 -1 22 -4.7 6.7
 4 -1 22 -1.7 2.4
 -3 1 -22 3.5 4.4
 -3 1 -22 26.5 9.6
 -3 1 -22 12.5 9.1
 -3 1 -22 7 2.3
 3 -1 22 5.4 3
 3 -1 22 -2.7 6.7
 -2 1 -22 16.1 4.5
 -2 1 -22 3.2 7.8
 -2 1 -22 16.2 4.3
 -2 1 -22 17.7 10.8
 2 -1 22 16.6 4.5
 2 -1 22 10.3 4.1
 2 -1 22 2.9 6.8
 2 -1 22 13.3 11.5
 -1 1 -22 46.5 12.1
 -1 1 -22 47.2 7.7
 1 -1 22 34.5 6.1
 1 -1 22 30.7 12.5
 1 -1 22 34.9 10.3
 1 -1 22 36.4 5.5
 0 1 -22 24.9 6.4
 0 1 -22 22.2 9.5
 0 -1 22 15.4 5.2
 0 -1 22 33.8 4.8
 0 -1 22 25.4 11.3
 0 -1 22 30.3 8.4
 1 1 -22 43.2 11.9
 -1 -1 22 59.89 5.3
 -1 -1 22 51.79 13.2
 -1 -1 22 54.49 9.8
 -1 -1 22 49.8 8.2
 2 1 -22 16.3 5.8
 2 1 -22 16.2 6.6
 2 1 -22 8.5 8.6
 -2 -1 22 19.6 2.5
 -2 -1 22 22.5 8.1
 -2 -1 22 13.5 10
 -2 -1 22 22 7.3
 -2 -1 22 15.8 6.2
 -2 -1 22 17.7 2.4
 3 1 -22 17.1 8.4
 -3 -1 22 14.8 9.9
 -3 -1 22 13.5 6
 -3 -1 22 13.7 6.4
 -3 -1 22 11.9 8.9
 -3 -1 22 4.3 6.8
 4 1 -22 17.5 9.5
 4 1 -22 29.1 9.2
 -4 -1 22 20.3 8.9
 -4 -1 22 30.5 7.8
 -4 -1 22 25 10.3
 -4 -1 22 44.1 10.1
 -4 -1 22 13.4 5.6
 -4 -1 22 20.7 6.7
 5 1 -22 44.5 10.3
 5 1 -22 51.99 12.9
 5 1 -22 40.1 9.9
 5 1 -22 28 10.5
 -5 -1 22 36.5 10.4
 -5 -1 22 34.8 7.7
 -5 -1 22 46.7 11.5
 -5 -1 22 35.7 6.4
 -5 -1 22 40.2 9.3
 -5 -1 22 26.7 9.2
 -5 -1 22 38.1 6.3
 6 1 -22 145.39 18.2
 6 1 -22 165.38 20.5
 6 1 -22 134.99 15.9
 6 1 -22 132.79 16.7
 -6 -1 22 165.48 17.5
 -6 -1 22 130.89 19.3
 -6 -1 22 164.68 10.9
 -6 -1 22 146.89 17.2
 -6 -1 22 138.19 14.4
 7 1 -22 189.48 19.3
 7 1 -22 189.08 21.7
 7 1 -22 172.88 17.3
 -7 -1 22 151.78 18.2
 -7 -1 22 180.58 16.5
 -7 -1 22 169.08 18.7
 -7 -1 22 163.98 18.2
 8 1 -22 133.09 17.8
 8 1 -22 92.69 13.9
 8 1 -22 93.79 13.2
 -8 -1 22 86.59 14.7
 -8 -1 22 129.89 17.1
 -8 -1 22 112.29 16.1
 -8 -1 22 121.59 14.5
 9 1 -22 119.39 15.4
 9 1 -22 125.89 17.1
 -9 -1 22 106.89 16.6
 -9 -1 22 80.39 15
 -9 -1 22 95.79 13.8
 -9 -1 22 94.09 15.9
 10 1 -22 64.89 10
 10 1 -22 69.29 11.8
 10 1 -22 58.99 12.3
 -10 -1 22 59.89 11.6
 -10 -1 22 62.29 13.3
 -10 1 -21 -2.6 6
 -10 1 -21 3.5 9.7
 -10 1 -21 4.4 3.9
 -10 1 -21 -1.1 10.8
 -10 1 -21 1.5 12.1
 -10 1 -21 -6.4 8.5
 10 -1 21 11.2 7.8
 -9 1 -21 6.3 11.5
 -9 1 -21 -0.9 11.9
 -9 1 -21 1.8 4.6
 -9 1 -21 -0.9 8.1
 -9 1 -21 1.8 6.3
 -9 1 -21 -2.4 8.6
 9 -1 21 3.3 9.2
 9 -1 21 11.3 8
 -8 1 -21 142.19 18
 -8 1 -21 164.78 16.9
 -8 1 -21 158.58 17.5
 -8 1 -21 186.08 21.8
 -8 1 -21 129.99 21.4
 -8 1 -21 119.19 14.8
 8 -1 21 156.38 16.9
 8 -1 21 164.58 22.1
 -7 1 -21 52.49 13.8
 -7 1 -21 83.09 12.8
 -7 1 -21 63.79 12.3
 -7 1 -21 72.79 13.4
 -7 1 -21 63.69 13.8
 -7 1 -21 60.19 8.2
 7 -1 21 43.3 10.3
 7 -1 21 50.19 14.5
 -6 1 -21 -0.4 8.1
 -6 1 -21 -5.1 6.4
 -6 1 -21 -4 9.3
 -6 1 -21 -6.3 5.3
 6 -1 21 0.7 7.4
 6 -1 21 -0.1 9.3
 -5 1 -21 69.09 12.9
 -5 1 -21 85.89 14.3
 -5 1 -21 69.19 9.3
 -5 1 -21 75.39 11.1
 -5 1 -21 76.99 15
 5 -1 21 85.39 15.9
 5 -1 21 66.09 11.9
 5 -1 21 67.79 10.3
 -4 1 -21 -3 8.1
 -4 1 -21 -4.2 6.4
 -4 1 -21 -4.2 4.8
 -4 1 -21 0.4 4.7
 4 -1 21 -1.3 9.6
 4 -1 21 -6.3 6.4
 -3 1 -21 39.4 4.4
 -3 1 -21 39.2 7.5
 -3 1 -21 41.6 11.6
 -3 1 -21 39.1 10.7
 -3 1 -21 44.3 7.4
 3 -1 21 55.19 7.8
 3 -1 21 51.79 5.8
 3 -1 21 34.7 12.2
 3 -1 21 47.9 10.5
 -2 1 -21 -3.9 3
 -2 1 -21 -2 7
 -2 1 -21 4.4 3.3
 -2 1 -21 -5.9 7.4
 2 -1 21 -2.9 3.4
 2 -1 21 -6.2 5.6
 2 -1 21 -1 8.9
 2 -1 21 2.2 3.1
 -1 1 -21 10.5 8.1
 -1 1 -21 2.8 3.9
 -1 1 -21 -9.2 7.3
 1 -1 21 1 3.1
 1 -1 21 -3 5.5
 1 -1 21 -10 8.2
 1 -1 21 -1.3 3.6
 0 1 -21 261.87 23
 0 1 -21 223.98 22.5
 0 1 -21 229.28 18
 0 -1 21 209.78 14.9
 0 -1 21 246.58 19.5
 0 -1 21 291.37 20
 0 -1 21 252.37 24.1
 0 -1 21 234.68 16.6
 1 1 -21 73.89 13.2
 1 1 -21 63.59 9.3
 1 1 -21 56.19 8.1
 1 1 -21 58.19 13
 -1 -1 21 56.19 13.5
 -1 -1 21 43.8 7.6
 -1 -1 21 45.7 9.3
 -1 -1 21 49.6 5.3
 -1 -1 21 56.29 10.1
 2 1 -21 34.9 10.4
 2 1 -21 40.3 8.8
 2 1 -21 33.8 11.3
 -2 -1 21 59.49 13.6
 -2 -1 21 46.6 4.5
 -2 -1 21 47.7 4.4
 -2 -1 21 57.99 8.7
 -2 -1 21 51.99 10
 -2 -1 21 48.7 9.1
 3 1 -21 15.3 9.4
 3 1 -21 14.6 8.2
 3 1 -21 11.6 7.9
 3 1 -21 10.5 5.3
 3 1 -21 16.2 7.4
 -3 -1 21 20.5 10.4
 -3 -1 21 17.9 2.4
 -3 -1 21 9.1 7.3
 -3 -1 21 10.2 6.1
 -3 -1 21 12 6.3
 -3 -1 21 20.4 8
 -3 -1 21 19 5.8
 4 1 -21 7.6 5.9
 4 1 -21 5 6.3
 4 1 -21 11.9 9
 4 1 -21 0.5 7.4
 -4 -1 21 14.8 8.4
 -4 -1 21 2.2 1.3
 -4 -1 21 1.6 5.5
 -4 -1 21 8.4 5.2
 -4 -1 21 1.9 4.1
 -4 -1 21 -7.3 6.1
 -4 -1 21 6.7 8.4
 5 1 -21 24.3 8.3
 5 1 -21 14 9
 5 1 -21 14.2 8
 -5 -1 21 15.4 6.7
 -5 -1 21 19.6 7.9
 -5 -1 21 20.2 9.4
 -5 -1 21 15.5 8.9
 -5 -1 21 17.7 7.1
 -5 -1 21 12.4 5
 -5 -1 21 6.1 4
 6 1 -21 12.1 8.9
 6 1 -21 -7.6 6.6
 6 1 -21 -3.7 5.3
 6 1 -21 -8.3 5.6
 6 1 -21 -5.9 5.9
 -6 -1 21 7.6 7.1
 -6 -1 21 0.1 2.8
 -6 -1 21 4.2 5.9
 -6 -1 21 2.3 3
 -6 -1 21 -0.7 6.8
 -6 -1 21 -0.9 7
 -6 -1 21 2.6 7.1
 7 1 -21 31.3 7.9
 7 1 -21 24.7 11
 7 1 -21 27.1 8
 7 1 -21 16.1 8.6
 -7 -1 21 19.4 8.2
 -7 -1 21 14.2 9.1
 -7 -1 21 14.9 9.4
 -7 -1 21 16.2 7
 8 1 -21 73.59 11.3
 8 1 -21 83.19 15.5
 8 1 -21 68.69 12
 -8 -1 21 96.59 14.9
 -8 -1 21 83.39 14.7
 -8 -1 21 43.5 10.9
 -8 -1 21 78.39 14.2
 9 1 -21 32.4 10
 9 1 -21 30.3 7.8
 9 1 -21 47.1 9.6
 -9 -1 21 29.9 10.9
 -9 -1 21 25.7 10.2
 -9 -1 21 27.1 8.8
 -9 -1 21 30.7 10.9
 10 1 -21 53.59 9.1
 10 1 -21 56.39 11.7
 10 1 -21 46 9.7
 -10 -1 21 49.4 13.6
 -10 -1 21 44.8 12.3
 -10 -1 21 49.2 12.3
 -10 -1 21 56.99 11
 -11 1 -20 -3.4 14
 -11 1 -20 27.3 10.9
 -11 1 -20 20.6 12.8
 11 -1 20 3.4 6.8
 11 -1 20 3.5 10.3
 -10 1 -20 4.4 5.3
 -10 1 -20 -14.9 10.7
 -10 1 -20 9 12.1
 -10 1 -20 24.2 12.3
 -10 1 -20 0.9 9.6
 10 -1 20 5.9 10.1
 10 -1 20 11.9 8.2
 -9 1 -20 17.3 11.5
 -9 1 -20 39 11.7
 -9 1 -20 33 7.7
 -9 1 -20 36.3 11
 -9 1 -20 44.2 15.1
 9 -1 20 56.49 11.5
 9 -1 20 20.8 12.1
 -8 1 -20 288.37 23.9
 -8 1 -20 306.87 22.4
 -8 1 -20 275.17 27.3
 -8 1 -20 266.07 25.2
 -8 1 -20 242.58 24.5
 -8 1 -20 227.28 17.9
 -8 1 -20 242.68 19.5
 8 -1 20 265.17 26.4
 8 -1 20 318.17 23.7
 8 -1 20 261.77 16.8
 -7 1 -20 55.49 13.5
 -7 1 -20 37.7 10.2
 -7 1 -20 56.29 11.5
 -7 1 -20 32.6 9.5
 -7 1 -20 28.6 6.3
 -7 1 -20 36.2 11.4
 7 -1 20 31.6 9.7
 7 -1 20 26.5 11.9
 7 -1 20 46.6 5.8
 -6 1 -20 64.59 8.6
 -6 1 -20 78.19 13.6
 -6 1 -20 65.79 14.3
 -6 1 -20 74.59 12.1
 -6 1 -20 75.29 12.7
 6 -1 20 72.69 15.6
 6 -1 20 65.29 11.6
 -5 1 -20 -4.6 8
 -5 1 -20 -3 6.5
 -5 1 -20 -1.6 3.9
 -5 1 -20 -0.8 5.5
 -5 1 -20 -8 7.3
 5 -1 20 -9.3 3.9
 5 -1 20 4.1 4.7
 5 -1 20 -5.9 7.1
 -4 1 -20 16 6.3
 -4 1 -20 12.2 8.4
 -4 1 -20 5.6 8.7
 4 -1 20 -5.4 8.5
 4 -1 20 16.8 7.6
 4 -1 20 18.8 5.2
 -3 1 -20 -6.3 6.9
 -3 1 -20 7.5 4.4
 -3 1 -20 8.9 7.9
 -3 1 -20 13 2.8
 3 -1 20 2.6 9.7
 3 -1 20 12.5 7.2
 3 -1 20 12.3 4.7
 -2 1 -20 34.3 5.6
 -2 1 -20 13.3 9.1
 -2 1 -20 20.4 5.3
 -2 1 -20 27.1 5.6
 -2 1 -20 24.9 9.1
 2 -1 20 26.7 11.2
 2 -1 20 30.9 5.1
 2 -1 20 23.5 5.3
 2 -1 20 39.5 8.9
 -1 1 -20 161.58 13
 -1 1 -20 211.08 19.6
 -1 1 -20 161.78 11.3
 -1 1 -20 172.58 18.1
 1 -1 20 147.69 11.7
 1 -1 20 158.48 12.1
 1 -1 20 156.58 15.2
 1 -1 20 187.78 21.6
 0 1 -20 0 7
 0 1 -20 -2.8 7.5
 0 1 -20 7.3 4.2
 0 -1 20 3.2 2.8
 0 -1 20 -1.5 8.5
 0 -1 20 2.6 5.6
 0 -1 20 5.2 4.7
 1 1 -20 -7.2 6.6
 1 1 -20 -4.3 6.1
 1 1 -20 2.2 3.6
 1 1 -20 2.3 4.4
 1 1 -20 5.4 5.6
 -1 -1 20 3.1 4.2
 -1 -1 20 5.8 9.2
 -1 -1 20 0.1 5.7
 -1 -1 20 3.1 5.6
 2 1 -20 9.1 7.7
 2 1 -20 22.4 7.8
 2 1 -20 10 6.8
 2 1 -20 14.8 7.1
 2 1 -20 17.5 5.3
 2 1 -20 11.2 8.7
 -2 -1 20 10.2 8.8
 -2 -1 20 4 4.4
 -2 -1 20 14.1 7.3
 -2 -1 20 9.4 5.2
 -2 -1 20 14.2 6.1
 3 1 -20 80.79 12.2
 3 1 -20 124.29 13.9
 3 1 -20 98.09 10.7
 3 1 -20 93.89 15.2
 3 1 -20 101.99 14
 3 1 -20 114.59 15.5
 -3 -1 20 104.09 11.9
 -3 -1 20 127.79 13.3
 -3 -1 20 103.89 7
 -3 -1 20 107.39 11.2
 -3 -1 20 88.59 12.7
 -3 -1 20 94.49 15.1
 4 1 -20 2.4 6.7
 4 1 -20 3.7 6.3
 4 1 -20 -7 4.7
 4 1 -20 -1.4 6.7
 -4 -1 20 -3.9 6.2
 -4 -1 20 2.2 3.8
 -4 -1 20 0.1 5.6
 -4 -1 20 -2.5 4.4
 -4 -1 20 0.9 1.9
 -4 -1 20 1.2 6.6
 -4 -1 20 -4.9 5.8
 5 1 -20 58.49 15.8
 5 1 -20 100.29 13.1
 5 1 -20 108.99 15.7
 5 1 -20 85.79 12.4
 -5 -1 20 89.09 8.9
 -5 -1 20 92.99 12.6
 -5 -1 20 78.89 13.1
 -5 -1 20 92.59 13.6
 -5 -1 20 94.59 6.6
 -5 -1 20 106.69 11.5
 -5 -1 20 77.49 14.6
 -5 -1 20 79.49 8.3
 6 1 -20 -5.9 7.1
 6 1 -20 -5.5 4.8
 6 1 -20 -7.3 6.1
 6 1 -20 -1.3 6.3
 -6 -1 20 3.4 2.6
 -6 -1 20 6.7 5.7
 -6 -1 20 5.5 2.5
 -6 -1 20 0.8 6.8
 -6 -1 20 9.1 7.8
 -6 -1 20 2.7 6.9
 7 1 -20 59.69 10
 7 1 -20 55.19 12
 7 1 -20 42.5 8.6
 7 1 -20 43.8 9.4
 7 1 -20 62.79 11.4
 -7 -1 20 36.1 15.4
 -7 -1 20 59.99 10.2
 -7 -1 20 52.89 11.5
 -7 -1 20 58.29 11.7
 8 1 -20 173.68 18.8
 8 1 -20 165.68 15.8
 8 1 -20 167.58 16.9
 8 1 -20 175.58 16.5
 -8 -1 20 173.28 18.7
 -8 -1 20 168.88 16.2
 -8 -1 20 141.09 18.8
 -8 -1 20 139.69 18.3
 9 1 -20 2.6 5.8
 9 1 -20 1.5 6.2
 9 1 -20 2.7 8.1
 -9 -1 20 -1.4 3.9
 -9 -1 20 1.1 7.5
 -9 -1 20 -2.4 7.7
 -9 -1 20 4 7
 -9 -1 20 -4.3 6.9
 10 1 -20 140.39 13.9
 10 1 -20 129.99 14.6
 -10 -1 20 135.89 19.3
 -10 -1 20 148.19 16.2
 -10 -1 20 119.49 18.1
 -10 -1 20 132.89 18.8
 11 1 -20 235.58 21
 11 1 -20 233.18 18.1
 -11 -1 20 185.58 27.2
 -11 -1 20 205.18 20.6
 -11 1 -19 10.3 9.6
 -11 1 -19 -1.1 11.5
 -11 1 -19 8.6 9.7
 -11 1 -19 39.9 14.5
 11 -1 19 -4.9 9.5
 11 -1 19 33.8 9.1
 -10 1 -19 16.9 12.4
 -10 1 -19 14.9 9.8
 -10 1 -19 10.3 13.1
 -10 1 -19 26.3 10.5
 -10 1 -19 14.3 6.1
 10 -1 19 -7.8 6.6
 10 -1 19 -18.1 8.2
 -9 1 -19 -10.6 6.5
 -9 1 -19 7.6 8.5
 -9 1 -19 -9.6 9.1
 -9 1 -19 10.5 5.5
 -9 1 -19 -6.6 3.1
 -9 1 -19 7.1 6.1
 -9 1 -19 3.1 5.2
 -9 1 -19 3.9 11
 9 -1 19 11.1 3.8
 9 -1 19 0.7 7.1
 9 -1 19 6 10.6
 -8 1 -19 28.7 8.4
 -8 1 -19 20.9 5.4
 -8 1 -19 31.9 9.2
 -8 1 -19 46.8 13.1
 -8 1 -19 32 9.5
 -8 1 -19 16.1 9.4
 -8 1 -19 27.7 6.9
 8 -1 19 34.9 12.4
 8 -1 19 29.4 4.7
 8 -1 19 30.5 9
 -7 1 -19 25.3 9.2
 -7 1 -19 40.9 11.4
 -7 1 -19 44.7 7.6
 -7 1 -19 12.3 4.8
 -7 1 -19 21.9 8.4
 -7 1 -19 25.5 9.5
 7 -1 19 28 11.2
 7 -1 19 19.8 4.3
 -6 1 -19 109.49 15.9
 -6 1 -19 135.39 18.5
 -6 1 -19 131.39 14.2
 -6 1 -19 108.89 11.7
 -6 1 -19 111.49 15.3
 -6 1 -19 98.09 10.4
 -6 1 -19 130.99 16
 6 -1 19 99.09 13.7
 6 -1 19 100.79 11.7
 -5 1 -19 30.8 10.2
 -5 1 -19 20.3 8.9
 -5 1 -19 32.6 5.8
 -5 1 -19 36.4 8.1
 -5 1 -19 34.7 10.2
 5 -1 19 15 10
 5 -1 19 21.6 6.1
 5 -1 19 32.6 8.9
 5 -1 19 36.6 7.1
 -4 1 -19 12.7 8.5
 -4 1 -19 5.9 5.5
 -4 1 -19 -1 3.9
 -4 1 -19 8.6 8.1
 4 -1 19 1.6 7
 4 -1 19 7 4.3
 4 -1 19 12.3 10.2
 4 -1 19 4.3 4.5
 -3 1 -19 101.99 7.6
 -3 1 -19 95.19 10
 -3 1 -19 91.29 14.7
 -3 1 -19 118.99 15.7
 -3 1 -19 108.29 11
 3 -1 19 109.39 9.9
 3 -1 19 99.59 16.5
 3 -1 19 124.39 13.6
 -2 1 -19 74.89 12.7
 -2 1 -19 62.79 7.1
 -2 1 -19 75.89 8.4
 -2 1 -19 80.29 13.2
 2 -1 19 61.89 7.9
 2 -1 19 59.69 10.4
 2 -1 19 59.19 6.8
 2 -1 19 66.29 13.7
 -1 1 -19 336.47 26.6
 -1 1 -19 337.67 22.5
 -1 1 -19 360.06 20.4
 -1 1 -19 319.17 25.9
 -1 1 -19 311.37 21.6
 1 -1 19 333.27 23.8
 1 -1 19 329.37 27.7
 1 -1 19 316.37 20.4
 1 -1 19 355.76 20.7
 0 1 -19 -1.1 4
 0 1 -19 -1 5.2
 0 1 -19 -2.5 5.5
 0 1 -19 2.9 7.5
 0 -1 19 -5.6 8
 0 -1 19 -2.6 3.7
 0 -1 19 -3.6 5.3
 0 -1 19 -0.7 2.5
 1 1 -19 183.38 13.6
 1 1 -19 185.58 17.7
 1 1 -19 167.68 16.4
 1 1 -19 151.38 17.6
 1 1 -19 165.38 15
 -1 -1 19 180.48 14.5
 -1 -1 19 178.58 13.7
 -1 -1 19 203.68 16
 -1 -1 19 159.78 18.7
 -1 -1 19 175.78 15
 2 1 -19 36.6 9.6
 2 1 -19 31.3 8.2
 2 1 -19 34.2 8
 2 1 -19 33 9.1
 2 1 -19 23.4 9.1
 2 1 -19 33.5 6.2
 -2 -1 19 10.8 4.6
 -2 -1 19 13.5 8.9
 -2 -1 19 21.3 6.4
 -2 -1 19 26.9 7.1
 -2 -1 19 49.1 8.7
 -2 -1 19 23.6 6.1
 3 1 -19 23.3 5.6
 3 1 -19 26 7.9
 3 1 -19 28 8.8
 3 1 -19 25.4 9
 3 1 -19 15.3 6.9
 3 1 -19 16.7 6.6
 -3 -1 19 20.3 5.3
 -3 -1 19 14.9 5.8
 -3 -1 19 9.7 4.1
 -3 -1 19 20.7 3.2
 -3 -1 19 32.7 7.8
 -3 -1 19 18.1 9
 -3 -1 19 11.9 5.9
 -3 -1 19 37.2 8.3
 4 1 -19 4.5 6.2
 4 1 -19 3.8 6.9
 4 1 -19 -0.9 6.7
 4 1 -19 3.7 5.1
 -4 -1 19 5.7 4.6
 -4 -1 19 -0.3 3.6
 -4 -1 19 0.1 5.4
 -4 -1 19 10.6 2.7
 -4 -1 19 1 6.2
 -4 -1 19 8.4 6.5
 -4 -1 19 0.5 4
 5 1 -19 1.3 6.4
 5 1 -19 -4 6.5
 5 1 -19 -0.5 5.4
 5 1 -19 -5.5 4.7
 -5 -1 19 1.4 4.9
 -5 -1 19 -0.7 5.5
 -5 -1 19 -6.6 2.7
 -5 -1 19 -10.5 6
 -5 -1 19 3 3.7
 -5 -1 19 -9.8 5.2
 -5 -1 19 0 6.3
 -5 -1 19 1.4 4.5
 -5 -1 19 0.5 2.3
 6 1 -19 0 6.7
 6 1 -19 -5.3 4.4
 6 1 -19 1.3 5.8
 6 1 -19 -0.2 5.1
 6 1 -19 2.3 6.8
 -6 -1 19 2.7 2.6
 -6 -1 19 4 5.9
 -6 -1 19 1.1 6.6
 -6 -1 19 10.5 7
 -6 -1 19 4.1 5.5
 -6 -1 19 4.1 7.2
 -6 -1 19 2.8 2.7
 -6 -1 19 1.6 2.3
 7 1 -19 56.49 10.4
 7 1 -19 54.59 9.2
 7 1 -19 87.99 11.3
 7 1 -19 76.29 12.4
 7 1 -19 89.49 13.5
 -7 -1 19 62.39 11.9
 -7 -1 19 64.49 10.5
 -7 -1 19 45.8 12.9
 -7 -1 19 73.69 10.8
 -7 -1 19 63.39 11.5
 -7 -1 19 69.49 7.2
 8 1 -19 46.9 9.3
 8 1 -19 44.1 10.9
 8 1 -19 60.59 9.9
 8 1 -19 47.4 9.5
 -8 -1 19 40.8 9
 -8 -1 19 44.4 11.7
 -8 -1 19 55.29 12
 -8 -1 19 51.39 12
 9 1 -19 9.1 6.4
 9 1 -19 28.8 7.1
 9 1 -19 22.2 9.1
 9 1 -19 8.4 6
 -9 -1 19 9.1 9.8
 -9 -1 19 19.1 9.2
 -9 -1 19 6.3 7.5
 -9 -1 19 13.1 8.2
 10 1 -19 1.7 5.5
 10 1 -19 10 5.5
 10 1 -19 6.2 7.2
 -10 -1 19 -8.3 7.7
 -10 -1 19 4.2 7.5
 -10 -1 19 5.7 8.1
 -10 -1 19 -11.8 7.3
 11 1 -19 0.2 6.9
 11 1 -19 10.5 5.4
 11 1 -19 10.4 5.4
 -11 -1 19 6.3 9.2
 -11 -1 19 15.4 9.7
 -11 -1 19 9.6 8
 -12 1 -18 -4.6 11.1
 -12 1 -18 3.6 9.1
 -12 1 -18 -1.1 12.9
 12 -1 18 15.6 7.6
 -11 1 -18 6.4 5
 -11 1 -18 -17.7 9.4
 -11 1 -18 4.6 8.8
 -11 1 -18 -23.6 9.7
 -11 1 -18 14.7 9.4
 11 -1 18 -6.1 8.5
 11 -1 18 7.7 7.3
 -10 1 -18 95.99 19.1
 -10 1 -18 108.89 22
 -10 1 -18 131.39 17.3
 -10 1 -18 128.39 18.1
 10 -1 18 79.39 16.1
 10 -1 18 134.29 15.7
 -9 1 -18 13.2 4.4
 -9 1 -18 12.3 9.9
 -9 1 -18 12.2 7
 -9 1 -18 7 8.4
 -9 1 -18 -1 5
 -9 1 -18 6.8 8.1
 -9 1 -18 10.2 5.4
 -9 1 -18 7.1 13.2
 9 -1 18 -2.8 5.9
 9 -1 18 10.8 9.9
 9 -1 18 3.1 6.3
 9 -1 18 4.8 3.5
 -8 1 -18 137.89 18.8
 -8 1 -18 149.79 12.1
 -8 1 -18 119.09 20.1
 -8 1 -18 146.09 13.2
 -8 1 -18 148.89 16.5
 -8 1 -18 166.98 15.6
 -8 1 -18 172.88 18.3
 8 -1 18 146.39 15.6
 8 -1 18 164.98 11.8
 8 -1 18 173.88 18.9
 8 -1 18 190.38 22.1
 -7 1 -18 0.8 6.5
 -7 1 -18 -7.1 3.3
 -7 1 -18 1.2 6.4
 -7 1 -18 0.4 7.9
 -7 1 -18 7 6.9
 -7 1 -18 2.7 7.5
 -7 1 -18 5.9 4.8
 7 -1 18 -1.3 9.3
 7 -1 18 8.9 5.7
 7 -1 18 1.6 6.3
 7 -1 18 5.9 3.3
 -6 1 -18 354.96 27.2
 -6 1 -18 379.06 26.5
 -6 1 -18 364.66 24.4
 -6 1 -18 352.36 28.1
 -6 1 -18 384.86 29.6
 -6 1 -18 335.27 22.6
 -6 1 -18 380.76 26.9
 6 -1 18 333.77 24
 6 -1 18 346.87 25.7
 6 -1 18 358.36 26
 6 -1 18 379.16 29.9
 -5 1 -18 13.1 6.3
 -5 1 -18 6.6 4.2
 -5 1 -18 15.6 8.5
 -5 1 -18 3.6 3.6
 -5 1 -18 -2.4 6.4
 -5 1 -18 14.2 8.2
 5 -1 18 19.4 6
 5 -1 18 -0.6 8.1
 5 -1 18 13.1 5
 5 -1 18 -3.1 6
 5 -1 18 6.5 5.4
 -4 1 -18 68.29 12.4
 -4 1 -18 57.69 7.7
 -4 1 -18 54.69 8.8
 -4 1 -18 66.49 11.7
 -4 1 -18 69.49 9.9
 4 -1 18 53.59 8.3
 4 -1 18 71.29 10.9
 4 -1 18 59.99 7.8
 4 -1 18 57.29 10.1
 4 -1 18 60.89 12.9
 -3 1 -18 915.81 50.99
 -3 1 -18 801.12 50.09
 -3 1 -18 769.72 46.1
 -3 1 -18 771.22 43.7
 -3 1 -18 877.61 47
 3 -1 18 845.92 48.4
 3 -1 18 839.92 52.09
 3 -1 18 842.72 49.2
 3 -1 18 767.92 44.9
 3 -1 18 742.83 45.8
 -2 1 -18 21.1 5.8
 -2 1 -18 18.7 8.1
 -2 1 -18 18.2 7.1
 -2 1 -18 26.3 9.4
 -2 1 -18 32.8 6.1
 -2 1 -18 18.5 4.6
 -2 1 -18 23 5.3
 2 -1 18 18.6 4.9
 2 -1 18 29.1 8
 2 -1 18 15.2 8.7
 -1 1 -18 628.54 38
 -1 1 -18 600.14 38.1
 -1 1 -18 536.85 34.5
 -1 1 -18 495.55 36.1
 -1 1 -18 539.25 33.6
 -1 1 -18 610.44 32.2
 1 -1 18 519.15 34.3
 1 -1 18 522.05 34.5
 1 -1 18 611.14 32.3
 1 -1 18 580.24 35.2
 1 -1 18 547.55 38.7
 0 1 -18 51.89 6.6
 0 1 -18 57.19 10
 0 1 -18 56.69 8.5
 0 1 -18 59.89 11.2
 0 1 -18 47.9 10.4
 0 1 -18 51.39 5
 0 -1 18 56.09 8.7
 0 -1 18 53.99 8.2
 0 -1 18 40.3 8.4
 0 -1 18 63.59 12.6
 0 -1 18 51.19 9.1
 0 -1 18 53.39 7
 1 1 -18 40.8 9.8
 1 1 -18 26.9 5.8
 1 1 -18 20.7 8
 1 1 -18 31.8 7.5
 1 1 -18 33 8.7
 1 1 -18 28.8 9.2
 -1 -1 18 34.4 7.5
 -1 -1 18 44.1 8.2
 -1 -1 18 31.5 10.1
 -1 -1 18 35 7.1
 2 1 -18 287.57 19.6
 2 1 -18 264.57 22.9
 2 1 -18 279.17 21.2
 2 1 -18 267.97 21.5
 2 1 -18 294.57 23.3
 2 1 -18 308.37 22.9
 -2 -1 18 281.47 24
 -2 -1 18 274.07 19.5
 -2 -1 18 310.37 20.3
 -2 -1 18 321.37 21.4
 -2 -1 18 317.27 20
 -2 -1 18 270.27 19.7
 3 1 -18 1 6
 3 1 -18 0.5 5.3
 3 1 -18 -0.6 3.9
 3 1 -18 -7.3 5.4
 3 1 -18 -0.1 6.3
 3 1 -18 -3.2 5.3
 -3 -1 18 3.4 2.2
 -3 -1 18 -7.5 4.9
 -3 -1 18 0.5 5.1
 -3 -1 18 -4.4 3.2
 -3 -1 18 -5.9 6.6
 -3 -1 18 10.8 5.4
 -3 -1 18 -7.7 4.2
 -3 -1 18 -3.9 3.4
 4 1 -18 7.4 5.1
 4 1 -18 3.5 6.4
 4 1 -18 5.9 5.7
 4 1 -18 11.1 4.8
 4 1 -18 4.8 7.6
 4 1 -18 13.2 6.4
 -4 -1 18 7.6 3.9
 -4 -1 18 0.8 7.3
 -4 -1 18 11.8 4.9
 -4 -1 18 4.9 4.5
 -4 -1 18 10.8 2.9
 -4 -1 18 7.3 6.1
 -4 -1 18 5.4 5.6
 -4 -1 18 8.7 6.4
 5 1 -18 -7.7 5.3
 5 1 -18 18.8 6.5
 5 1 -18 16.9 7.9
 5 1 -18 2.5 5.3
 -5 -1 18 5.4 2.8
 -5 -1 18 9.5 6.3
 -5 -1 18 8.7 3.8
 -5 -1 18 13.4 7.2
 -5 -1 18 6.9 7
 -5 -1 18 4.8 3.8
 -5 -1 18 13.1 7
 -5 -1 18 6 5.1
 -5 -1 18 8.2 4.5
 6 1 -18 4.9 4.9
 6 1 -18 1.4 5.9
 6 1 -18 11.1 7.2
 6 1 -18 1.1 5.5
 6 1 -18 -2.5 4.7
 -6 -1 18 8.2 7.3
 -6 -1 18 1.4 6.6
 -6 -1 18 4.6 4.7
 -6 -1 18 2.5 6.7
 -6 -1 18 4.7 2.6
 -6 -1 18 6.9 5.4
 -6 -1 18 11.1 6.4
 -6 -1 18 3.6 3.4
 -6 -1 18 -0.4 2.2
 7 1 -18 28.9 8.3
 7 1 -18 40.3 7.9
 7 1 -18 29.3 8.7
 7 1 -18 32 7.4
 -7 -1 18 22.7 6.9
 -7 -1 18 23.1 10.4
 -7 -1 18 36.9 8
 -7 -1 18 37.3 10.1
 -7 -1 18 32 5.4
 -7 -1 18 22.5 8.5
 -7 -1 18 32.4 7
 8 1 -18 89.89 13.1
 8 1 -18 69.19 9.9
 8 1 -18 61.39 10.3
 8 1 -18 80.59 11.4
 -8 -1 18 71.49 13.2
 -8 -1 18 68.09 12.9
 -8 -1 18 66.59 9.2
 -8 -1 18 91.69 14.2
 -8 -1 18 70.29 11.2
 -8 -1 18 68.59 8.2
 9 1 -18 -1.9 6.6
 9 1 -18 -2.6 4.6
 9 1 -18 4.3 5.2
 9 1 -18 4.8 5.4
 -9 -1 18 4.8 7.6
 -9 -1 18 -2.8 2.4
 -9 -1 18 3.8 8.2
 -9 -1 18 -7.3 7.2
 -9 -1 18 -0.5 6.4
 10 1 -18 5 5.4
 10 1 -18 8.5 7.6
 10 1 -18 2.5 5
 10 1 -18 8.9 5.5
 -10 -1 18 9.7 7.7
 -10 -1 18 -1.6 8.1
 -10 -1 18 2.5 7.9
 -10 -1 18 4.3 8.9
 11 1 -18 37.6 7.5
 11 1 -18 46.4 7.9
 11 1 -18 44.8 10.4
 -11 -1 18 50.09 12
 -11 -1 18 17.6 8
 -11 -1 18 21.6 9.3
 12 1 -18 29.1 11.6
 12 1 -18 22.9 8.1
 12 1 -18 24.3 5.1
 12 1 -18 26.5 6.3
 -12 -1 18 29.8 9.5
 -12 1 -17 -1.6 8
 -12 1 -17 -0.4 8.8
 -12 1 -17 -4.3 11.5
 12 -1 17 -7.2 5.2
 12 -1 17 10.3 8.5
 -11 1 -17 92.79 19.5
 -11 1 -17 73.19 15
 -11 1 -17 66.09 13.3
 -11 1 -17 81.89 17.6
 11 -1 17 66.09 13.3
 11 -1 17 61.79 11.1
 -10 1 -17 16.5 12.7
 -10 1 -17 16.7 9.3
 -10 1 -17 3.5 8.5
 -10 1 -17 17 12.7
 10 -1 17 22.2 8
 10 -1 17 23.8 5.1
 10 -1 17 17.6 7.4
 10 -1 17 4.9 8.4
 -9 1 -17 -1.8 9.1
 -9 1 -17 0.1 7.8
 -9 1 -17 2.6 4.5
 -9 1 -17 15.4 13.4
 -9 1 -17 4.4 5.6
 -9 1 -17 -4.9 3.2
 -9 1 -17 15.8 9.1
 9 -1 17 16.3 7.5
 9 -1 17 1.2 5.8
 9 -1 17 -5.8 8
 9 -1 17 4 3.7
 -8 1 -17 22.5 8.6
 -8 1 -17 18 9.4
 -8 1 -17 24.3 5.4
 -8 1 -17 23.2 9.5
 -8 1 -17 21.4 7.3
 -8 1 -17 4.4 3.4
 8 -1 17 2.7 5.8
 8 -1 17 15.9 9.6
 8 -1 17 18.7 7.2
 8 -1 17 19.5 4
 -7 1 -17 413.26 31.6
 -7 1 -17 340.87 23.3
 -7 1 -17 379.86 26.9
 -7 1 -17 403.16 27.9
 -7 1 -17 379.06 29.1
 -7 1 -17 395.36 25.1
 -7 1 -17 424.66 28.7
 7 -1 17 405.86 30.8
 7 -1 17 380.06 26.9
 7 -1 17 376.96 23
 7 -1 17 345.67 26.3
 -6 1 -17 20.8 5.9
 -6 1 -17 17.4 8.5
 -6 1 -17 34.9 9.1
 -6 1 -17 16.8 7.7
 -6 1 -17 8.3 4.1
 -6 1 -17 2.8 6.8
 -6 1 -17 11.8 8.8
 6 -1 17 14 6.2
 6 -1 17 9.8 4.9
 6 -1 17 3.3 5.9
 6 -1 17 15 4.5
 6 -1 17 19.2 9.9
 -5 1 -17 99.69 14
 -5 1 -17 125.69 16.3
 -5 1 -17 91.69 13.3
 -5 1 -17 85.29 9.2
 -5 1 -17 123.29 12.7
 5 -1 17 121.69 16.7
 5 -1 17 114.89 10.9
 5 -1 17 110.49 12.3
 5 -1 17 92.59 11.1
 5 -1 17 98.49 12.6
 -4 1 -17 9.1 5
 -4 1 -17 5.6 5.7
 -4 1 -17 2.3 6.6
 -4 1 -17 6.1 3.9
 -4 1 -17 12.4 7.3
 4 -1 17 6.6 6
 4 -1 17 -4.6 3.8
 4 -1 17 5.5 6.2
 4 -1 17 13.2 8.4
 4 -1 17 7.8 4.3
 -3 1 -17 105.49 10.8
 -3 1 -17 91.99 13.5
 -3 1 -17 119.39 14
 -3 1 -17 97.19 9.7
 -3 1 -17 101.29 11.3
 -3 1 -17 106.19 7.7
 -3 1 -17 110.79 14.5
 3 -1 17 108.89 9.9
 3 -1 17 123.69 12.7
 3 -1 17 106.49 15.8
 3 -1 17 100.49 9.1
 -2 1 -17 126.09 14.1
 -2 1 -17 141.89 16.1
 -2 1 -17 160.98 13.4
 -2 1 -17 161.38 12.2
 -2 1 -17 151.18 11.1
 -2 1 -17 148.79 16.1
 -2 1 -17 151.68 12.1
 2 -1 17 150.78 10.3
 2 -1 17 147.09 11.3
 2 -1 17 175.08 19.4
 2 -1 17 143.99 14.1
 2 -1 17 102.39 11.6
 -1 1 -17 312.67 20.1
 -1 1 -17 311.67 23.6
 -1 1 -17 309.07 21.2
 -1 1 -17 298.17 18.6
 -1 1 -17 312.67 19.8
 -1 1 -17 319.47 24
 1 -1 17 282.47 20.5
 1 -1 17 298.87 21.5
 1 -1 17 326.27 18.6
 1 -1 17 292.07 24.9
 1 -1 17 268.27 18.5
 1 -1 17 289.27 20.9
 0 1 -17 47.6 8.2
 0 1 -17 45.2 10.6
 0 1 -17 57.79 5.4
 0 1 -17 52.19 10.6
 0 1 -17 58.29 6.9
 0 1 -17 56.19 9.8
 0 -1 17 56.79 6.9
 0 -1 17 55.29 9.9
 0 -1 17 57.89 9.3
 0 -1 17 71.99 10.2
 0 -1 17 50.89 11.8
 1 1 -17 646.14 42
 1 1 -17 692.53 38.8
 1 1 -17 567.94 41.6
 1 1 -17 743.33 42.9
 1 1 -17 593.44 40.8
 1 1 -17 675.03 40.5
 -1 -1 17 700.43 43.8
 -1 -1 17 701.43 41.6
 -1 -1 17 725.03 38.9
 -1 -1 17 652.43 39.7
 -1 -1 17 647.54 39.6
 -1 -1 17 768.32 40.6
 2 1 -17 268.87 18.3
 2 1 -17 260.97 20.1
 2 1 -17 265.27 21.9
 2 1 -17 237.68 18.8
 2 1 -17 254.37 20.7
 2 1 -17 244.98 20
 2 1 -17 288.17 21.9
 -2 -1 17 257.17 18.2
 -2 -1 17 263.17 18.7
 -2 -1 17 245.58 22.2
 -2 -1 17 311.07 20.1
 -2 -1 17 266.97 18.8
 -2 -1 17 294.27 18.6
 3 1 -17 467.65 32.1
 3 1 -17 479.25 31.9
 3 1 -17 464.95 30.6
 3 1 -17 476.95 30
 3 1 -17 453.85 29.4
 3 1 -17 487.85 32.5
 3 1 -17 440.06 31.1
 -3 -1 17 517.55 30.7
 -3 -1 17 448.96 29.1
 -3 -1 17 463.55 28.8
 -3 -1 17 459.15 28.6
 -3 -1 17 545.45 31.2
 -3 -1 17 450.05 32.7
 -3 -1 17 470.05 29.6
 -3 -1 17 501.15 26.5
 4 1 -17 588.44 35.8
 4 1 -17 604.64 38
 4 1 -17 576.74 37.4
 4 1 -17 553.54 37
 4 1 -17 581.84 37.7
 4 1 -17 563.54 35.3
 4 1 -17 590.14 36.1
 -4 -1 17 583.74 38
 -4 -1 17 622.74 36.6
 -4 -1 17 564.34 33.5
 -4 -1 17 581.24 33.7
 -4 -1 17 571.64 36.1
 -4 -1 17 541.75 34.6
 -4 -1 17 638.74 36
 -4 -1 17 588.14 32.2
 5 1 -17 -0.5 5
 5 1 -17 9.3 7.1
 5 1 -17 12.8 5.3
 5 1 -17 0.3 5.7
 5 1 -17 6.3 5.4
 -5 -1 17 3.2 5.4
 -5 -1 17 -0.1 5.1
 -5 -1 17 10.1 6.7
 -5 -1 17 -1.4 4.2
 -5 -1 17 1.5 6.3
 -5 -1 17 5.1 4.1
 -5 -1 17 2.3 2.9
 -5 -1 17 9.8 6.3
 6 1 -17 38.5 8.3
 6 1 -17 62.59 10.9
 6 1 -17 43.6 9
 6 1 -17 58.29 9.3
 6 1 -17 48.7 8.2
 -6 -1 17 57.99 8.8
 -6 -1 17 55.49 9.5
 -6 -1 17 66.59 11.1
 -6 -1 17 68.39 10.8
 -6 -1 17 54.89 6.5
 -6 -1 17 63.39 11
 -6 -1 17 47 4.7
 -6 -1 17 45.5 8
 -6 -1 17 47.9 4.6
 7 1 -17 150.78 14.3
 7 1 -17 122.39 13.4
 7 1 -17 154.38 15.9
 7 1 -17 136.39 14.7
 7 1 -17 154.48 14
 -7 -1 17 167.88 14.5
 -7 -1 17 153.18 14
 -7 -1 17 139.59 15.7
 -7 -1 17 141.49 15.7
 -7 -1 17 159.88 11.7
 -7 -1 17 153.98 15.7
 8 1 -17 28 8.2
 8 1 -17 22.6 6.7
 8 1 -17 13.3 6.3
 8 1 -17 21.8 6.2
 8 1 -17 15.9 6.9
 -8 -1 17 19.1 8.4
 -8 -1 17 24.8 7.6
 -8 -1 17 13.9 8.2
 -8 -1 17 27.4 5.8
 9 1 -17 7.4 6.9
 9 1 -17 17.2 5.5
 9 1 -17 11.9 5.6
 9 1 -17 11.3 6.5
 -9 -1 17 5.5 7.1
 -9 -1 17 -2.4 7.7
 -9 -1 17 11.1 3.4
 -9 -1 17 8.3 5.2
 -9 -1 17 13.8 8.5
 -9 -1 17 0.6 7.8
 10 1 -17 3.1 6
 10 1 -17 1.2 4.6
 10 1 -17 0.8 4.8
 10 1 -17 -3.3 4.1
 -10 -1 17 -7.2 7.1
 -10 -1 17 1 7.2
 -10 -1 17 -1.5 8
 -10 -1 17 7.7 8.6
 11 1 -17 -1.7 5.8
 11 1 -17 8 4.9
 11 1 -17 6.1 4.9
 -11 -1 17 1.2 7
 -11 -1 17 2.8 7.4
 -11 -1 17 -0.9 7.3
 -11 -1 17 6.8 8.6
 12 1 -17 3.5 6.6
 12 1 -17 14.1 5.3
 12 1 -17 1.3 8.2
 12 1 -17 3.4 3.2
 -12 -1 17 4.7 9.3
 -12 -1 17 -6.7 7.6
 -12 -1 17 15.3 9.2
 -12 1 -16 32.4 14.6
 -12 1 -16 53.89 16.7
 -12 1 -16 61.59 14.6
 -12 1 -16 63.79 13.4
 12 -1 16 46.1 11.6
 12 -1 16 52.29 10.3
 -11 1 -16 -7.2 8.8
 -11 1 -16 14.6 13
 -11 1 -16 8.5 8.1
 -11 1 -16 -1.9 4
 -11 1 -16 0.4 11.1
 11 -1 16 8.9 6.9
 11 -1 16 11.3 9
 -10 1 -16 29.5 11
 -10 1 -16 20.5 11.8
 -10 1 -16 20.2 9.2
 -10 1 -16 9.9 11.7
 10 -1 16 21.3 6.9
 10 -1 16 25.4 5.1
 10 -1 16 25.2 10.5
 10 -1 16 24.8 8
 -9 1 -16 29.7 12.8
 -9 1 -16 55.19 13.6
 -9 1 -16 49 15.3
 -9 1 -16 39.2 5.3
 -9 1 -16 25.7 10
 -9 1 -16 37.3 5
 -9 1 -16 35 5.4
 -9 1 -16 39.9 8.8
 9 -1 16 60.39 10.1
 9 -1 16 33.8 6.2
 9 -1 16 25.2 10.5
 9 -1 16 33.9 8.1
 -8 1 -16 16.7 8.6
 -8 1 -16 23.7 9.8
 -8 1 -16 14.6 6.3
 -8 1 -16 22.2 7.1
 -8 1 -16 21.1 4.5
 -8 1 -16 12.2 11.1
 -8 1 -16 21.6 10.8
 -8 1 -16 23.9 5.2
 8 -1 16 18 6.1
 8 -1 16 22.2 7.6
 8 -1 16 23.2 10.2
 8 -1 16 18.1 4.2
 -7 1 -16 -6.5 6.4
 -7 1 -16 5.4 3.3
 -7 1 -16 5.4 8.4
 -7 1 -16 -2.5 3.7
 -7 1 -16 8.2 7.5
 -7 1 -16 4.9 7.2
 -7 1 -16 -1.7 5.6
 7 -1 16 -1.9 4.9
 7 -1 16 0.7 4.4
 7 -1 16 -8.2 7.5
 7 -1 16 7.3 3
 -6 1 -16 74.49 11.3
 -6 1 -16 78.39 12.1
 -6 1 -16 66.29 7.5
 -6 1 -16 63.29 8.9
 -6 1 -16 48.3 10.3
 -6 1 -16 71.09 12.3
 -6 1 -16 59.89 12.6
 6 -1 16 69.19 11.6
 6 -1 16 79.29 10.9
 6 -1 16 77.79 13.9
 6 -1 16 79.19 11
 6 -1 16 85.09 10.6
 -5 1 -16 210.68 20.3
 -5 1 -16 214.48 18.4
 -5 1 -16 196.78 17.1
 -5 1 -16 200.28 14.4
 -5 1 -16 198.88 18.3
 -5 1 -16 193.98 15.8
 5 -1 16 195.88 16.8
 5 -1 16 240.38 16.2
 5 -1 16 189.58 16.6
 5 -1 16 222.48 20.5
 5 -1 16 191.98 15.6
 -4 1 -16 388.96 26.4
 -4 1 -16 413.66 28.7
 -4 1 -16 426.06 27.2
 -4 1 -16 399.46 25
 -4 1 -16 451.45 29.4
 4 -1 16 429.06 30.8
 4 -1 16 417.16 25.7
 4 -1 16 382.36 27
 4 -1 16 422.86 26.1
 -3 1 -16 172.28 15.8
 -3 1 -16 135.49 14.1
 -3 1 -16 125.99 12.7
 -3 1 -16 142.29 9.4
 -3 1 -16 155.98 12.6
 -3 1 -16 143.69 11.5
 -3 1 -16 150.18 15.6
 3 -1 16 126.49 13.3
 3 -1 16 142.79 11.1
 3 -1 16 136.09 11.5
 3 -1 16 159.38 17.2
 -2 1 -16 19 4.8
 -2 1 -16 10.3 6.8
 -2 1 -16 10.6 7.5
 -2 1 -16 14.3 5.3
 -2 1 -16 14.8 4.7
 -2 1 -16 11.3 3.7
 2 -1 16 15.3 3.7
 2 -1 16 4.5 3.6
 2 -1 16 12.6 8.4
 2 -1 16 16.8 4.4
 2 -1 16 4 5.8
 2 -1 16 14.9 4.9
 -1 1 -16 660.63 40
 -1 1 -16 704.63 40.5
 -1 1 -16 698.83 43.3
 -1 1 -16 708.63 43.5
 -1 1 -16 707.53 39.3
 -1 1 -16 694.93 41.7
 -1 1 -16 728.63 43.9
 1 -1 16 701.93 44.8
 1 -1 16 680.23 41.1
 1 -1 16 740.53 39
 1 -1 16 749.33 41.9
 1 -1 16 693.43 41.5
 0 1 -16 433.76 30.7
 0 1 -16 440.76 30.7
 0 1 -16 450.55 30.6
 0 1 -16 455.95 25.6
 0 1 -16 489.35 28.5
 0 1 -16 473.25 26.9
 0 -1 16 401.86 27.9
 0 -1 16 490.95 26.8
 0 -1 16 475.65 32.2
 0 -1 16 469.75 28.9
 0 -1 16 440.56 28.1
 1 1 -16 516.25 36.4
 1 1 -16 508.75 35.2
 1 1 -16 539.25 34.9
 1 1 -16 608.04 37
 1 1 -16 594.04 33.5
 1 1 -16 592.84 37
 -1 -1 16 582.34 33.3
 -1 -1 16 573.64 37.9
 -1 -1 16 663.63 35.2
 -1 -1 16 539.05 34.2
 -1 -1 16 597.44 34.6
 -1 -1 16 604.44 34.5
 2 1 -16 1156.38 68.19
 2 1 -16 1142.19 68.49
 2 1 -16 1310.87 70.09
 2 1 -16 1205.88 69.69
 2 1 -16 1150.88 69.29
 2 1 -16 1198.18 66.99
 2 1 -16 1260.67 70.09
 -2 -1 16 1213.88 70.39
 -2 -1 16 1168.38 66.69
 -2 -1 16 1330.67 67.99
 -2 -1 16 1131.79 66.89
 -2 -1 16 1301.67 68.69
 -2 -1 16 1275.17 67.49
 -2 -1 16 1196.58 66.89
 3 1 -16 48.3 9.4
 3 1 -16 48.6 7.9
 3 1 -16 39.9 7.5
 3 1 -16 50.69 9
 3 1 -16 63.59 10.7
 3 1 -16 59.09 10.5
 3 1 -16 54.29 10.1
 -3 -1 16 58.99 7.5
 -3 -1 16 39.5 9.7
 -3 -1 16 68.99 9.9
 -3 -1 16 48.6 5.4
 -3 -1 16 61.89 9.6
 -3 -1 16 48.9 7.7
 -3 -1 16 68.89 8.2
 -3 -1 16 48.9 8.8
 -3 -1 16 50.59 8.5
 -3 -1 16 35.4 7.2
 4 1 -16 2082.09 109.39
 4 1 -16 2064.19 110.89
 4 1 -16 2180.18 111.19
 4 1 -16 1981.9 110.49
 4 1 -16 1985.1 114.29
 4 1 -16 1926.71 109.19
 4 1 -16 2007.4 108.89
 -4 -1 16 2059.79 109.59
 -4 -1 16 1958.3 110.79
 -4 -1 16 2145.89 109.89
 -4 -1 16 2113.39 109.49
 -4 -1 16 1833.12 108.09
 -4 -1 16 1943.91 106.99
 -4 -1 16 1991.1 107.19
 -4 -1 16 2028.8 105.99
 -4 -1 16 1956.2 108.99
 5 1 -16 415.36 29.2
 5 1 -16 461.65 28.4
 5 1 -16 450.35 27.7
 5 1 -16 468.45 30
 5 1 -16 492.05 29.1
 5 1 -16 451.25 29.3
 -5 -1 16 399.36 25.1
 -5 -1 16 412.56 27.3
 -5 -1 16 401.06 27
 -5 -1 16 432.56 25.3
 -5 -1 16 396.96 28.5
 -5 -1 16 494.85 30.2
 -5 -1 16 471.55 29.3
 -5 -1 16 409.46 25
 -5 -1 16 479.45 27.6
 -5 -1 16 437.46 29.1
 6 1 -16 135.89 14.7
 6 1 -16 154.28 12.9
 6 1 -16 161.38 14.6
 6 1 -16 179.88 15.6
 6 1 -16 155.68 13.6
 6 1 -16 156.78 14
 -6 -1 16 148.49 9.2
 -6 -1 16 161.48 15.4
 -6 -1 16 155.88 9.4
 -6 -1 16 151.88 15.3
 -6 -1 16 160.18 15.2
 -6 -1 16 139.09 12.9
 -6 -1 16 153.18 13.8
 -6 -1 16 158.58 11.6
 -6 -1 16 154.78 14.6
 7 1 -16 149.88 14.3
 7 1 -16 174.28 14.2
 7 1 -16 158.08 15.1
 7 1 -16 204.68 16.6
 7 1 -16 163.38 14.7
 7 1 -16 159.18 13.4
 -7 -1 16 170.48 16.4
 -7 -1 16 140.99 13.1
 -7 -1 16 189.68 15.3
 -7 -1 16 163.88 16.4
 -7 -1 16 157.98 16.1
 -7 -1 16 150.68 14.1
 -7 -1 16 160.48 12.6
 8 1 -16 4.2 5.1
 8 1 -16 5.8 4.8
 8 1 -16 -4.7 6
 8 1 -16 3.5 5.1
 8 1 -16 8.3 5
 -8 -1 16 0.9 3.9
 -8 -1 16 -2.2 4.3
 -8 -1 16 -0.3 6.1
 -8 -1 16 1.4 7.1
 -8 -1 16 -1.1 4.7
 -8 -1 16 -3.2 6.8
 -8 -1 16 0.6 5.4
 9 1 -16 1.8 6.3
 9 1 -16 -0.4 5.1
 9 1 -16 11.3 5.1
 9 1 -16 3.7 5.1
 -9 -1 16 8.7 8.4
 -9 -1 16 -7.9 6
 -9 -1 16 8.6 5.3
 -9 -1 16 2.6 7.4
 -9 -1 16 -0.3 2.3
 -9 -1 16 -0.7 7.1
 10 1 -16 3 4.7
 10 1 -16 1.1 6.1
 10 1 -16 10.8 4.7
 10 1 -16 17.1 5.7
 -10 -1 16 12.2 8.9
 -10 -1 16 5.4 7.9
 -10 -1 16 4.8 8.1
 -10 -1 16 10 9.3
 11 1 -16 29.3 8.1
 11 1 -16 32.4 6.5
 11 1 -16 30 11.2
 11 1 -16 26.5 7.6
 11 1 -16 37.4 6.9
 -11 -1 16 29.6 10.3
 -11 -1 16 20.4 10.6
 -11 -1 16 33.4 9.9
 -11 -1 16 44.3 12
 12 1 -16 34.5 6.4
 12 1 -16 41.8 11.8
 12 1 -16 29.4 5.9
 12 1 -16 23.4 7.9
 -12 -1 16 25.6 11.1
 -12 -1 16 40 11
 -12 -1 16 30.1 10.4
 -13 1 -15 -12 9.9
 -13 1 -15 4.9 8.9
 -13 1 -15 -4.3 13.6
 13 -1 15 -1.1 5.1
 13 -1 15 7 6.9
 -12 1 -15 2.3 10
 -12 1 -15 0.8 9.5
 -12 1 -15 1.5 7.7
 -12 1 -15 14.7 11.2
 12 -1 15 6.4 6.6
 12 -1 15 10.9 8.3
 -11 1 -15 18.3 12.2
 -11 1 -15 12.7 8.7
 -11 1 -15 14.8 12.9
 -11 1 -15 11.5 9.9
 -11 1 -15 0.5 3.3
 11 -1 15 -4.3 5.2
 11 -1 15 19.4 7.1
 11 -1 15 5.3 7.9
 11 -1 15 13.6 5.5
 -10 1 -15 155.08 23.5
 -10 1 -15 167.58 20
 -10 1 -15 131.09 17.9
 -10 1 -15 94.59 19.5
 10 -1 15 129.79 15.2
 10 -1 15 155.18 18.6
 10 -1 15 153.78 13.6
 10 -1 15 151.58 14.9
 -9 1 -15 329.97 19.6
 -9 1 -15 367.16 23.9
 -9 1 -15 268.97 28.1
 -9 1 -15 311.87 26.5
 -9 1 -15 350.56 47.4
 -9 1 -15 292.97 26.3
 -9 1 -15 337.87 19.1
 -9 1 -15 320.07 18.7
 9 -1 15 292.07 20.7
 9 -1 15 352.46 23.8
 9 -1 15 295.07 22.8
 -8 1 -15 43.5 10.6
 -8 1 -15 34.4 11.9
 -8 1 -15 35.4 6.9
 -8 1 -15 49 14.1
 -8 1 -15 33.4 8.1
 -8 1 -15 42 10.6
 8 -1 15 47.8 8.9
 8 -1 15 18.3 9.3
 8 -1 15 38.9 8.1
 8 -1 15 39.2 6.1
 -7 1 -15 23 8.6
 -7 1 -15 4 7.8
 -7 1 -15 9.5 7.8
 -7 1 -15 10.8 6.5
 -7 1 -15 6.2 4.1
 -7 1 -15 6.2 6
 -7 1 -15 10.2 3.8
 7 -1 15 15.3 4.1
 7 -1 15 12.8 8.5
 7 -1 15 6.7 3.6
 7 -1 15 11 6.6
 7 -1 15 7.3 5.3
 -6 1 -15 52.69 9.7
 -6 1 -15 45.2 6.2
 -6 1 -15 55.49 8
 -6 1 -15 40.3 10.6
 -6 1 -15 41.4 9
 -6 1 -15 38.9 10.6
 -6 1 -15 61.29 10.6
 6 -1 15 51.89 8.6
 6 -1 15 50.19 8.5
 6 -1 15 45 8.7
 6 -1 15 42.2 10.7
 6 -1 15 53.79 9.4
 -5 1 -15 11.1 3.9
 -5 1 -15 2.3 7.2
 -5 1 -15 8.2 6.9
 -5 1 -15 11.1 6.3
 -5 1 -15 22.1 5.7
 5 -1 15 13.4 4.9
 5 -1 15 16 6.1
 5 -1 15 4.7 5.9
 5 -1 15 6.4 7.9
 5 -1 15 0.6 2.3
 5 -1 15 8.1 4.6
 -4 1 -15 21.5 4.8
 -4 1 -15 52.59 9.5
 -4 1 -15 43.7 7.2
 -4 1 -15 33.3 8.7
 -4 1 -15 24.6 7.9
 4 -1 15 46.9 8.1
 4 -1 15 37.8 6.4
 4 -1 15 20.7 6.8
 4 -1 15 38.9 6.9
 4 -1 15 36.3 9.8
 -3 1 -15 245.48 15
 -3 1 -15 262.77 17.1
 -3 1 -15 276.17 20.6
 -3 1 -15 290.17 18.5
 -3 1 -15 252.07 20.4
 -3 1 -15 229.08 21.3
 -3 1 -15 270.87 18.5
 3 -1 15 264.57 17.5
 3 -1 15 302.47 22.8
 3 -1 15 272.17 19.6
 3 -1 15 243.88 16.8
 3 -1 15 224.18 18.6
 -2 1 -15 133.29 13.1
 -2 1 -15 133.99 14.2
 -2 1 -15 127.99 9.3
 -2 1 -15 138.09 13.7
 -2 1 -15 129.89 10.4
 -2 1 -15 129.09 10.6
 -2 1 -15 118.59 11.1
 2 -1 15 89.19 11.4
 2 -1 15 127.39 15.7
 2 -1 15 122.29 9.2
 2 -1 15 126.29 10.1
 2 -1 15 125.39 12.1
 2 -1 15 114.09 11.2
 2 -1 15 124.89 11.4
 -1 1 -15 236.88 14.8
 -1 1 -15 217.08 16.3
 -1 1 -15 213.58 18.1
 -1 1 -15 207.58 15.1
 -1 1 -15 236.58 18.8
 -1 1 -15 236.08 18.2
 1 -1 15 208.58 16.2
 1 -1 15 232.38 16.9
 1 -1 15 244.48 20.1
 1 -1 15 228.28 16.3
 1 -1 15 233.88 17.5
 0 1 -15 2.8 5.2
 0 1 -15 11.4 3.6
 0 1 -15 3.2 4.2
 0 1 -15 3.6 5
 0 1 -15 7.2 6.3
 0 1 -15 4.1 5.7
 0 1 -15 8.8 2.7
 0 -1 15 8 4.4
 0 -1 15 1.6 6.5
 0 -1 15 3.9 5.1
 0 -1 15 2 3.8
 0 -1 15 7.4 3.4
 0 -1 15 1.5 4.7
 1 1 -15 29.6 6.1
 1 1 -15 30.9 5.6
 1 1 -15 14.6 6.5
 1 1 -15 26.3 2.6
 1 1 -15 27.3 6.6
 1 1 -15 27.2 7.2
 1 1 -15 28.8 7.9
 1 1 -15 22.5 7.6
 -1 -1 15 25.6 5.9
 -1 -1 15 30.6 5.3
 -1 -1 15 36.6 7
 -1 -1 15 14.9 5.6
 -1 -1 15 32.1 6.1
 -1 -1 15 28.6 8.6
 -1 -1 15 35.9 6.2
 2 1 -15 278.37 20.4
 2 1 -15 241.68 19.6
 2 1 -15 245.18 18.7
 2 1 -15 251.67 19.1
 2 1 -15 238.28 19.8
 2 1 -15 251.17 17.9
 2 1 -15 256.27 17.5
 -2 -1 15 240.98 17.3
 -2 -1 15 267.67 18.3
 -2 -1 15 282.67 17.7
 -2 -1 15 260.27 17.5
 -2 -1 15 274.87 21.1
 -2 -1 15 230.38 16.9
 -2 -1 15 273.37 18.5
 3 1 -15 476.75 30.8
 3 1 -15 476.55 30.3
 3 1 -15 524.45 32.3
 3 1 -15 463.35 30.2
 3 1 -15 522.65 32.3
 3 1 -15 497.05 32.1
 3 1 -15 496.25 32.1
 -3 -1 15 518.15 29.5
 -3 -1 15 467.55 30.5
 -3 -1 15 500.95 33
 -3 -1 15 500.55 29.3
 -3 -1 15 478.15 30.1
 -3 -1 15 482.25 27.5
 -3 -1 15 547.85 31.3
 -3 -1 15 475.85 29.8
 -3 -1 15 583.14 31.6
 -3 -1 15 467.05 30.7
 4 1 -15 44 8.5
 4 1 -15 54.99 8.8
 4 1 -15 51.79 8.3
 4 1 -15 51.99 9.5
 4 1 -15 31.2 8.2
 4 1 -15 65.89 8.3
 4 1 -15 62.49 10.6
 -4 -1 15 49.9 9.1
 -4 -1 15 34.8 6.9
 -4 -1 15 59.49 7.1
 -4 -1 15 49.9 9
 -4 -1 15 44.6 5.5
 -4 -1 15 49.5 7.4
 -4 -1 15 54.29 9.4
 -4 -1 15 52.89 9.8
 -4 -1 15 50.49 9
 -4 -1 15 34.5 7.9
 5 1 -15 145.29 12.7
 5 1 -15 150.28 14.3
 5 1 -15 137.39 13.9
 5 1 -15 151.68 15
 5 1 -15 127.49 13
 5 1 -15 140.89 11.8
 5 1 -15 144.19 13.6
 -5 -1 15 137.09 13.7
 -5 -1 15 139.69 13.9
 -5 -1 15 140.09 11.7
 -5 -1 15 128.09 11.7
 -5 -1 15 119.69 11.7
 -5 -1 15 120.89 13.5
 -5 -1 15 121.29 14
 -5 -1 15 121.59 10.1
 -5 -1 15 144.09 9.6
 -5 -1 15 121.59 9.7
 6 1 -15 51.39 8.7
 6 1 -15 66.09 10.2
 6 1 -15 48.1 8.2
 6 1 -15 62.79 8.6
 6 1 -15 55.99 8.9
 -6 -1 15 43.1 6.4
 -6 -1 15 54.19 8.3
 -6 -1 15 48.6 7.7
 -6 -1 15 47.5 10.2
 -6 -1 15 57.79 10.1
 -6 -1 15 51.89 7.3
 -6 -1 15 53.69 3.9
 -6 -1 15 47.3 9.5
 -6 -1 15 58.09 8.8
 7 1 -15 62.19 10.4
 7 1 -15 90.59 11.1
 7 1 -15 86.19 10.7
 7 1 -15 71.29 9
 7 1 -15 76.99 10.4
 7 1 -15 91.29 10.1
 -7 -1 15 63.39 11.3
 -7 -1 15 72.69 9.2
 -7 -1 15 81.09 9
 -7 -1 15 75.69 9.4
 -7 -1 15 94.09 11.2
 -7 -1 15 89.69 12.9
 -7 -1 15 89.89 12.6
 -7 -1 15 63.79 7.9
 8 1 -15 202.38 16.3
 8 1 -15 229.88 16.2
 8 1 -15 241.28 17.2
 8 1 -15 222.58 17.8
 8 1 -15 203.88 15.5
 -8 -1 15 208.68 19.3
 -8 -1 15 204.78 14.6
 -8 -1 15 206.18 15.7
 -8 -1 15 209.58 19.3
 -8 -1 15 211.28 14
 -8 -1 15 168.08 15.3
 -8 -1 15 210.48 19.4
 -8 -1 15 224.28 17.7
 9 1 -15 94.39 12.6
 9 1 -15 85.39 9.3
 9 1 -15 100.29 12.5
 9 1 -15 106.69 10.7
 9 1 -15 104.39 11.1
 9 1 -15 113.69 10.8
 -9 -1 15 104.69 13.6
 -9 -1 15 90.19 6.5
 -9 -1 15 88.69 14.3
 -9 -1 15 93.89 10.7
 -9 -1 15 129.59 18.2
 -9 -1 15 93.19 6.6
 10 1 -15 2.2 5.6
 10 1 -15 10.6 4.5
 10 1 -15 8.8 5.1
 10 1 -15 7.2 4.8
 -10 -1 15 10.9 6.3
 -10 -1 15 13.9 8.1
 -10 -1 15 14.3 8.7
 -10 -1 15 -3.3 8
 -10 -1 15 4.3 7.9
 11 1 -15 111.09 12.8
 11 1 -15 125.79 17.4
 11 1 -15 118.19 10.8
 11 1 -15 135.19 11.9
 11 1 -15 129.19 10.8
 -11 -1 15 112.59 15.2
 -11 -1 15 125.29 18
 -11 -1 15 123.99 18.4
 12 1 -15 72.19 8.7
 12 1 -15 44.9 5.7
 12 1 -15 73.69 13.8
 12 1 -15 75.19 10.8
 12 1 -15 61.49 6.2
 -12 -1 15 71.09 14.1
 -12 -1 15 66.89 14.1
 -12 -1 15 67.89 12.9
 13 1 -15 41.4 7.9
 13 1 -15 17.3 9.7
 13 1 -15 28.3 6.3
 -13 -1 15 18.4 10.1
 -13 -1 15 42.6 11.5
 -13 -1 15 20.4 10.3
 -13 1 -14 10.1 7.6
 -13 1 -14 3.8 11.8
 -13 1 -14 27.4 17.8
 13 -1 14 18.2 6.5
 13 -1 14 12.4 6.9
 -12 1 -14 160.98 24
 -12 1 -14 156.48 23.5
 -12 1 -14 168.08 22
 -12 1 -14 143.69 18.4
 12 -1 14 149.59 16.2
 12 -1 14 159.98 17.4
 -11 1 -14 154.48 18.6
 -11 1 -14 136.09 21.8
 -11 1 -14 115.89 18.2
 -11 1 -14 120.09 22
 11 -1 14 140.49 17.1
 11 -1 14 133.09 13.4
 11 -1 14 107.79 13.4
 11 -1 14 144.19 14.1
 -10 1 -14 155.18 22.3
 -10 1 -14 174.48 19.9
 -10 1 -14 191.38 25.2
 -10 1 -14 193.48 20
 10 -1 14 200.48 17.8
 10 -1 14 175.28 16
 10 -1 14 165.48 18.9
 10 -1 14 191.98 16
 -9 1 -14 125.89 19.7
 -9 1 -14 130.29 9.1
 -9 1 -14 105.39 6.5
 -9 1 -14 138.59 16.6
 -9 1 -14 122.19 12.4
 -9 1 -14 132.29 17
 -9 1 -14 104.09 17.7
 9 -1 14 104.19 15.5
 9 -1 14 122.19 12.7
 9 -1 14 128.99 12.4
 9 -1 14 108.09 10
 -8 1 -14 22.5 4.1
 -8 1 -14 22.7 6.7
 -8 1 -14 17.9 8.7
 -8 1 -14 10 8.1
 -8 1 -14 22.7 5.6
 -8 1 -14 17.2 4.2
 -8 1 -14 27.5 11.4
 -8 1 -14 13.9 9.8
 8 -1 14 21.8 8.5
 8 -1 14 19.6 5
 8 -1 14 28.4 7.3
 8 -1 14 22.9 6.5
 -7 1 -14 118.89 15.1
 -7 1 -14 111.19 9.1
 -7 1 -14 107.09 9.7
 -7 1 -14 82.59 14.7
 -7 1 -14 102.69 12.6
 -7 1 -14 102.29 11.7
 -7 1 -14 137.99 15.5
 7 -1 14 98.59 11.2
 7 -1 14 123.89 12.4
 7 -1 14 111.89 9.3
 7 -1 14 110.59 11.9
 7 -1 14 80.89 9.8
 7 -1 14 97.19 14.3
 -6 1 -14 47.5 7.7
 -6 1 -14 48.7 10.4
 -6 1 -14 35.5 10.5
 -6 1 -14 54.59 10.2
 -6 1 -14 46.7 9
 -6 1 -14 33.7 7.6
 -6 1 -14 42.7 9
 6 -1 14 52.99 8.6
 6 -1 14 52.89 8.8
 6 -1 14 55.19 9
 6 -1 14 42.5 8.3
 6 -1 14 40.8 10.3
 6 -1 14 57.09 9.2
 6 -1 14 61.19 10
 -5 1 -14 16.2 6.8
 -5 1 -14 19.2 7.3
 -5 1 -14 20.9 4.5
 -5 1 -14 10.3 8
 -5 1 -14 31.3 6.6
 -5 1 -14 23.3 7.8
 5 -1 14 33.9 6.9
 5 -1 14 34.8 7.3
 5 -1 14 21.2 6.1
 5 -1 14 8.5 7.7
 5 -1 14 23.2 6.3
 5 -1 14 16.6 6.6
 -4 1 -14 5.5 5.3
 -4 1 -14 4.5 6.2
 -4 1 -14 -1.1 2.9
 -4 1 -14 5.4 5.9
 -4 1 -14 -2.1 4
 -4 1 -14 7.5 3.7
 4 -1 14 4.6 4.2
 4 -1 14 4.6 4.2
 4 -1 14 -9.7 4.7
 4 -1 14 9.5 5.3
 4 -1 14 3.5 4.2
 4 -1 14 4.9 4.2
 4 -1 14 1.8 6.3
 -3 1 -14 485.75 31.6
 -3 1 -14 469.05 28.7
 -3 1 -14 423.76 23.8
 -3 1 -14 404.96 25.4
 -3 1 -14 468.35 27.2
 -3 1 -14 441.56 28.8
 -3 1 -14 451.05 27.1
 3 -1 14 367.76 26.7
 3 -1 14 409.06 25.9
 3 -1 14 412.06 27.7
 3 -1 14 460.65 30.3
 3 -1 14 468.65 27.7
 3 -1 14 406.66 27
 -2 1 -14 730.53 45.5
 -2 1 -14 785.02 44.2
 -2 1 -14 778.52 43
 -2 1 -14 841.12 43.5
 -2 1 -14 774.62 45.8
 -2 1 -14 801.32 46.1
 -2 1 -14 761.02 42.1
 2 -1 14 752.22 44.9
 2 -1 14 717.33 43.7
 2 -1 14 763.12 44.4
 2 -1 14 808.72 47.3
 2 -1 14 760.92 44.3
 2 -1 14 760.62 44.2
 2 -1 14 732.03 42.2
 -1 1 -14 167.48 15.2
 -1 1 -14 163.18 11.9
 -1 1 -14 158.98 11.4
 -1 1 -14 153.98 14.5
 -1 1 -14 170.38 12.9
 -1 1 -14 165.88 14.5
 1 -1 14 180.18 13.4
 1 -1 14 165.98 12.9
 1 -1 14 157.88 13.6
 1 -1 14 153.08 10.2
 1 -1 14 166.88 13.2
 1 -1 14 160.58 15.8
 0 1 -14 78.89 8.5
 0 1 -14 96.59 9.4
 0 1 -14 88.39 6.8
 0 1 -14 78.79 7.5
 0 1 -14 66.09 9.6
 0 1 -14 104.59 11.2
 0 1 -14 75.19 10.7
 0 1 -14 104.39 11.1
 0 -1 14 97.29 9.3
 0 -1 14 94.79 9.9
 0 -1 14 90.49 7.9
 0 -1 14 97.89 9.4
 0 -1 14 92.29 9
 0 -1 14 88.99 7.5
 0 -1 14 96.39 12.6
 1 1 -14 35 7.5
 1 1 -14 60.79 8.6
 1 1 -14 42.8 8.5
 1 1 -14 63.09 7.3
 1 1 -14 41.9 8.3
 1 1 -14 68.09 9.7
 1 1 -14 53.39 3.9
 1 1 -14 63.89 8.1
 -1 -1 14 49.2 6.9
 -1 -1 14 63.19 7.7
 -1 -1 14 65.59 7.4
 -1 -1 14 53.09 7.7
 -1 -1 14 58.29 9.9
 -1 -1 14 61.89 6.5
 -1 -1 14 49.3 7.2
 -1 -1 14 50.19 7.7
 2 1 -14 26 5.9
 2 1 -14 46.7 8.2
 2 1 -14 40.6 8.4
 2 1 -14 40.9 6.7
 2 1 -14 34.6 6.9
 2 1 -14 29.1 6.8
 2 1 -14 31 7.7
 -2 -1 14 42.3 6.5
 -2 -1 14 32.1 5.9
 -2 -1 14 45 9.2
 -2 -1 14 43.6 6.9
 -2 -1 14 38.5 6.2
 -2 -1 14 35.8 6.7
 -2 -1 14 35 6
 3 1 -14 1219.48 68.99
 3 1 -14 1201.48 67.49
 3 1 -14 1205.98 69.09
 3 1 -14 1152.88 68.69
 3 1 -14 1229.78 69.59
 3 1 -14 1262.87 67.99
 3 1 -14 1206.28 67.69
 -3 -1 14 1173.58 67.69
 -3 -1 14 1206.88 66.49
 -3 -1 14 1180.58 66.99
 -3 -1 14 1267.27 68.19
 -3 -1 14 1239.78 65.09
 -3 -1 14 1288.57 69.89
 -3 -1 14 1357.66 68.29
 4 1 -14 230.98 15.7
 4 1 -14 236.98 16.3
 4 1 -14 233.28 18.2
 4 1 -14 225.08 17.1
 4 1 -14 200.48 16.7
 4 1 -14 192.68 16
 4 1 -14 213.48 17.2
 -4 -1 14 210.98 15.5
 -4 -1 14 208.28 16.3
 -4 -1 14 205.28 16.8
 -4 -1 14 220.68 16.7
 -4 -1 14 217.28 16.7
 -4 -1 14 194.08 17.1
 -4 -1 14 208.18 15
 -4 -1 14 216.18 14
 -4 -1 14 225.48 13.7
 -4 -1 14 196.98 14.1
 5 1 -14 166.18 21.1
 5 1 -14 141.59 13.9
 5 1 -14 179.18 13.6
 5 1 -14 168.58 12.4
 5 1 -14 192.08 15.2
 5 1 -14 179.78 14.7
 5 1 -14 156.38 17.2
 -5 -1 14 159.98 11.5
 -5 -1 14 153.38 14.1
 -5 -1 14 153.88 12.9
 -5 -1 14 141.69 14.1
 -5 -1 14 155.08 12.6
 -5 -1 14 161.88 12.7
 -5 -1 14 146.29 14.7
 -5 -1 14 156.08 14.9
 -5 -1 14 146.99 10.2
 -5 -1 14 144.99 14.6
 6 1 -14 13.5 5.5
 6 1 -14 3.5 5.4
 6 1 -14 7.3 5.4
 6 1 -14 -2.3 4
 6 1 -14 6 3.9
 6 1 -14 9.4 5
 6 1 -14 5.1 2.8
 6 1 -14 7.7 4.8
 6 1 -14 9.4 5.5
 -6 -1 14 -4.6 3.4
 -6 -1 14 5.2 3.5
 -6 -1 14 8 6.9
 -6 -1 14 6.9 4.1
 -6 -1 14 3.9 6.3
 -6 -1 14 -3.3 6.2
 -6 -1 14 12 5.9
 -6 -1 14 14.7 5.7
 7 1 -14 868.81 48.7
 7 1 -14 930.91 49.1
 7 1 -14 822.42 50.29
 7 1 -14 927.91 50.19
 7 1 -14 942.61 50.29
 7 1 -14 846.52 47.4
 7 1 -14 901.51 50.49
 -7 -1 14 812.92 51.29
 -7 -1 14 824.72 49.1
 -7 -1 14 807.42 51.19
 -7 -1 14 783.72 50.89
 -7 -1 14 816.72 48.5
 -7 -1 14 847.62 48.4
 -7 -1 14 888.31 48.1
 -7 -1 14 901.81 50.09
 8 1 -14 611.04 33.5
 8 1 -14 577.04 34.1
 8 1 -14 574.44 34
 8 1 -14 568.34 35.7
 8 1 -14 599.44 35.1
 8 1 -14 515.15 35.1
 -8 -1 14 600.74 35.5
 -8 -1 14 551.84 36.8
 -8 -1 14 525.95 33.2
 -8 -1 14 539.55 31.7
 -8 -1 14 535.85 36.5
 -8 -1 14 512.85 36
 -8 -1 14 532.75 31.2
 9 1 -14 3.7 4.4
 9 1 -14 4.7 4
 9 1 -14 3.7 5.3
 9 1 -14 5 4.2
 9 1 -14 7.3 3.6
 9 1 -14 5 5.1
 -9 -1 14 -4.2 7.1
 -9 -1 14 5.2 7.3
 -9 -1 14 -1.2 5
 -9 -1 14 0.1 6.1
 -9 -1 14 -1.1 7.4
 10 1 -14 25.1 7.1
 10 1 -14 21.8 5
 10 1 -14 29.8 6.3
 10 1 -14 23 5.4
 -10 -1 14 32.5 10.1
 -10 -1 14 40.4 11.3
 -10 -1 14 33.8 11.2
 -10 -1 14 20.3 7.2
 -10 -1 14 32.3 9
 11 1 -14 2.8 5.4
 11 1 -14 19.4 9.5
 11 1 -14 3.7 3.4
 11 1 -14 4.6 3.4
 11 1 -14 3.2 4.2
 -11 -1 14 3.9 8.3
 -11 -1 14 0.2 7.9
 -11 -1 14 -7.5 6.2
 12 1 -14 46.6 7.3
 12 1 -14 43.3 8
 12 1 -14 37.1 11.2
 12 1 -14 29.3 5
 12 1 -14 47.8 4.7
 -12 -1 14 53.09 12.5
 -12 -1 14 38.1 10.2
 -12 -1 14 63.59 13.2
 13 1 -14 41 10.9
 13 1 -14 20.4 6.4
 13 1 -14 22.5 5.3
 -13 -1 14 15.6 10
 -13 -1 14 30 10.5
 -13 -1 14 13 9.3
 -13 1 -13 -5.3 10.9
 -13 1 -13 -15.7 9
 13 -1 13 -0.4 5.9
 -12 1 -13 14 10.3
 -12 1 -13 34.1 13.5
 -12 1 -13 45.7 15.3
 -12 1 -13 23.2 9.1
 12 -1 13 23.7 7.1
 12 -1 13 19.9 8.3
 -11 1 -13 10.6 9.5
 -11 1 -13 20.5 11.6
 -11 1 -13 21.3 9.3
 -11 1 -13 7.9 12.3
 11 -1 13 5.5 4.8
 11 -1 13 15.4 8.1
 11 -1 13 20 6.9
 -10 1 -13 61.49 12.8
 -10 1 -13 67.29 15.7
 -10 1 -13 46.7 12.6
 -10 1 -13 74.09 9
 10 -1 13 73.69 10.1
 10 -1 13 50.29 10.9
 -9 1 -13 21.5 9.3
 -9 1 -13 28.8 12.5
 -9 1 -13 18.7 10.2
 -9 1 -13 18.5 3.8
 -9 1 -13 18.4 8.7
 -9 1 -13 26.2 6.6
 9 -1 13 24.1 6.3
 9 -1 13 17.2 8.2
 9 -1 13 15.7 4.9
 9 -1 13 28.4 7.1
 -8 1 -13 532.75 35.4
 -8 1 -13 526.35 37.7
 -8 1 -13 487.95 35
 -8 1 -13 532.55 30
 -8 1 -13 526.85 32.6
 -8 1 -13 520.05 38.6
 -8 1 -13 494.85 29.2
 -8 1 -13 505.55 29.4
 8 -1 13 511.35 38.5
 8 -1 13 574.64 32.9
 8 -1 13 500.55 30.5
 8 -1 13 521.15 32.7
 8 -1 13 465.05 34.2
 -7 1 -13 34.8 9.2
 -7 1 -13 27.2 8.5
 -7 1 -13 13.6 7.3
 -7 1 -13 24 4.3
 -7 1 -13 14.2 8.9
 -7 1 -13 18 6.7
 7 -1 13 18.7 6.6
 7 -1 13 29.9 6.8
 7 -1 13 4.6 7.4
 7 -1 13 27.1 7.7
 7 -1 13 23 4.8
 7 -1 13 31.1 7.4
 7 -1 13 28 6.4
 7 -1 13 29.4 6.3
 7 -1 13 16.4 6.3
 -6 1 -13 51.89 9.8
 -6 1 -13 51.39 7.5
 -6 1 -13 59.59 12
 -6 1 -13 71.59 9.5
 -6 1 -13 44.7 8.6
 -6 1 -13 55.39 6.5
 -6 1 -13 54.89 10.3
 -6 1 -13 48.8 9.1
 -6 1 -13 61.09 11.2
 6 -1 13 62.29 9.1
 6 -1 13 54.79 9.1
 6 -1 13 60.99 9.4
 6 -1 13 51.09 6.4
 6 -1 13 49.4 8.6
 6 -1 13 56.29 9.6
 6 -1 13 33.3 9.7
 -5 1 -13 461.85 27.8
 -5 1 -13 428.36 25
 -5 1 -13 455.05 28.5
 -5 1 -13 410.56 29.4
 -5 1 -13 391.26 30
 -5 1 -13 422.26 28
 -5 1 -13 424.06 28
 -5 1 -13 418.96 26.3
 5 -1 13 412.66 27
 5 -1 13 425.56 29.8
 5 -1 13 427.46 27.3
 5 -1 13 427.26 26.9
 5 -1 13 440.86 27.9
 5 -1 13 425.16 27.2
 -4 1 -13 875.41 51.89
 -4 1 -13 942.31 52.49
 -4 1 -13 913.41 49.4
 -4 1 -13 980.7 52.69
 -4 1 -13 921.61 51.49
 -4 1 -13 874.81 50.49
 4 -1 13 826.32 50.79
 4 -1 13 881.11 50.59
 4 -1 13 891.41 51.29
 4 -1 13 884.51 51.59
 4 -1 13 893.91 51.49
 4 -1 13 890.11 50.49
 4 -1 13 923.01 53.79
 -3 1 -13 121.79 9.4
 -3 1 -13 122.19 10.4
 -3 1 -13 119.49 12.7
 -3 1 -13 121.39 10.9
 -3 1 -13 114.69 11.9
 -3 1 -13 113.29 7.6
 -3 1 -13 118.29 11.7
 3 -1 13 109.89 11.1
 3 -1 13 106.89 9.7
 3 -1 13 126.69 11.5
 3 -1 13 106.99 10.6
 3 -1 13 127.79 10.1
 3 -1 13 106.79 10.6
 3 -1 13 129.09 13.9
 -2 1 -13 464.65 27.7
 -2 1 -13 459.35 29.2
 -2 1 -13 450.15 26.5
 -2 1 -13 456.25 25.7
 -2 1 -13 454.15 29.1
 -2 1 -13 493.65 27.2
 -2 1 -13 465.65 29.4
 2 -1 13 416.86 28.1
 2 -1 13 432.46 27.6
 2 -1 13 472.05 27.9
 2 -1 13 455.75 28
 2 -1 13 427.86 26
 2 -1 13 450.75 30.3
 -1 1 -13 350.26 21.5
 -1 1 -13 362.96 23
 -1 1 -13 352.86 20.7
 -1 1 -13 374.46 24.7
 -1 1 -13 388.96 24.9
 -1 1 -13 369.36 21.9
 -1 1 -13 367.76 24.7
 1 -1 13 362.16 23
 1 -1 13 367.46 23.8
 1 -1 13 381.26 23.1
 1 -1 13 384.46 25.8
 1 -1 13 368.46 23.3
 1 -1 13 358.06 20.7
 0 1 -13 84.69 7.1
 0 1 -13 88.69 6.6
 0 1 -13 98.69 8.5
 0 1 -13 90.89 8.6
 0 1 -13 100.69 10.5
 0 1 -13 87.59 9.9
 0 1 -13 62.59 9.5
 0 -1 13 93.19 8.4
 0 -1 13 89.59 11.4
 0 -1 13 74.79 7.2
 0 -1 13 91.49 7.1
 0 -1 13 85.59 8.6
 0 -1 13 85.89 9.1
 0 -1 13 66.99 8.1
 1 1 -13 1524.95 86.99
 1 1 -13 1589.44 84.69
 1 1 -13 1634.04 85.69
 1 1 -13 1646.24 87.19
 1 1 -13 1422.16 86.39
 1 1 -13 1570.74 82.49
 1 1 -13 1370.86 85.49
 1 1 -13 1630.84 86.29
 -1 -1 13 1631.64 84.39
 -1 -1 13 1624.64 85.49
 -1 -1 13 1705.93 87.09
 -1 -1 13 1532.85 87.59
 -1 -1 13 1619.04 85.29
 -1 -1 13 1599.64 86.29
 -1 -1 13 1650.23 84.99
 2 1 -13 191.28 14.8
 2 1 -13 186.98 14
 2 1 -13 186.98 15.1
 2 1 -13 201.88 17.2
 2 1 -13 210.88 14.1
 2 1 -13 160.28 20.7
 2 1 -13 204.88 15.8
 -2 -1 13 199.68 13.6
 -2 -1 13 215.48 14
 -2 -1 13 206.68 14.8
 -2 -1 13 192.58 14.1
 -2 -1 13 198.58 13.8
 -2 -1 13 212.08 14.5
 -2 -1 13 176.48 13.5
 -2 -1 13 217.68 16.8
 3 1 -13 943.91 53.69
 3 1 -13 889.51 52.99
 3 1 -13 967.7 52.19
 3 1 -13 838.22 52.59
 3 1 -13 907.41 51.79
 3 1 -13 927.81 51.69
 -3 -1 13 861.01 53.09
 -3 -1 13 1083.99 52.79
 -3 -1 13 912.61 51.69
 -3 -1 13 895.11 50.59
 -3 -1 13 887.71 49.5
 -3 -1 13 972.5 52.19
 -3 -1 13 962 51.39
 4 1 -13 79.89 9.5
 4 1 -13 62.19 9.4
 4 1 -13 67.19 7.5
 4 1 -13 74.19 8.6
 4 1 -13 62.79 4.7
 4 1 -13 77.99 10
 4 1 -13 44.3 8.2
 4 1 -13 90.29 10.4
 -4 -1 13 54.99 8.5
 -4 -1 13 75.89 6.6
 -4 -1 13 71.39 6.5
 -4 -1 13 71.89 7.7
 -4 -1 13 70.79 9.6
 -4 -1 13 73.39 6.9
 -4 -1 13 80.49 10.1
 -4 -1 13 69.69 7.8
 -4 -1 13 85.69 9.6
 -4 -1 13 52.69 8.6
 5 1 -13 175.08 16.1
 5 1 -13 230.98 16.9
 5 1 -13 242.48 15.6
 5 1 -13 230.88 17
 5 1 -13 241.88 16
 5 1 -13 226.18 13.4
 5 1 -13 220.18 16.8
 5 1 -13 229.58 18.4
 -5 -1 13 224.38 14.6
 -5 -1 13 214.38 17.3
 -5 -1 13 225.98 15.5
 -5 -1 13 227.78 15.8
 -5 -1 13 209.28 15.3
 -5 -1 13 200.68 16.9
 -5 -1 13 216.68 17.3
 -5 -1 13 193.98 17.3
 -5 -1 13 251.87 17.2
 -5 -1 13 213.78 13.1
 6 1 -13 185.08 14.8
 6 1 -13 193.88 15.4
 6 1 -13 197.98 15.2
 6 1 -13 169.58 14.5
 6 1 -13 186.98 13.4
 6 1 -13 193.08 15.4
 6 1 -13 199.58 12.4
 6 1 -13 196.68 17.3
 6 1 -13 174.68 14.6
 -6 -1 13 156.08 15.6
 -6 -1 13 192.58 14.6
 -6 -1 13 190.58 14.8
 -6 -1 13 143.49 15.4
 -6 -1 13 175.48 13.1
 -6 -1 13 177.38 13.7
 -6 -1 13 182.38 16.2
 -6 -1 13 171.88 13.2
 7 1 -13 436.06 27.1
 7 1 -13 390.46 29.7
 7 1 -13 456.75 27.2
 7 1 -13 419.66 28
 7 1 -13 445.26 26
 7 1 -13 447.96 25.6
 7 1 -13 469.75 27.9
 7 1 -13 499.45 26.9
 -7 -1 13 415.66 28.9
 -7 -1 13 403.16 26.1
 -7 -1 13 384.46 28.7
 -7 -1 13 368.96 26
 -7 -1 13 404.36 29.1
 -7 -1 13 400.66 24.9
 -7 -1 13 441.46 27.7
 8 1 -13 276.77 18.1
 8 1 -13 275.77 17.6
 8 1 -13 251.97 16.8
 8 1 -13 282.87 18.3
 8 1 -13 255.67 17.4
 8 1 -13 236.38 19.5
 8 1 -13 258.37 19.8
 -8 -1 13 271.57 21
 -8 -1 13 228.48 21
 -8 -1 13 260.27 18.2
 -8 -1 13 231.28 15
 -8 -1 13 240.18 19.6
 -8 -1 13 230.68 21
 -8 -1 13 237.78 15.4
 9 1 -13 157.68 15
 9 1 -13 168.88 12.8
 9 1 -13 167.68 11.9
 9 1 -13 153.88 12.4
 9 1 -13 157.48 12.6
 9 1 -13 136.19 12.5
 -9 -1 13 175.68 14.3
 -9 -1 13 98.39 15.6
 -9 -1 13 138.19 15.2
 -9 -1 13 124.79 15.8
 -9 -1 13 137.49 16.2
 10 1 -13 0.3 3.7
 10 1 -13 7.4 3.7
 10 1 -13 13.9 4.8
 10 1 -13 -5.3 3.7
 -10 -1 13 8.4 8.3
 -10 -1 13 9.3 7.2
 -10 -1 13 -1.8 7.4
 -10 -1 13 8.4 5.9
 -10 -1 13 2.6 7.8
 11 1 -13 337.97 21
 11 1 -13 368.66 28.9
 11 1 -13 357.16 21.2
 11 1 -13 361.56 22.6
 11 1 -13 366.16 24
 11 1 -13 332.37 21.8
 -11 -1 13 337.97 28.8
 -11 -1 13 358.66 27.2
 -11 -1 13 341.97 27.8
 12 1 -13 13.4 9.1
 12 1 -13 14.2 5.7
 12 1 -13 10.5 4.8
 -12 -1 13 9.1 8.9
 -12 -1 13 7.9 8.2
 -12 -1 13 13.5 9.7
 13 1 -13 111.29 10.8
 13 1 -13 106.29 16.2
 13 1 -13 92.99 9.3
 -13 -1 13 83.29 15.5
 -13 -1 13 58.99 14.7
 -13 -1 13 61.69 12.9
 -14 1 -12 3.3 10.7
 -14 1 -12 10.7 9.3
 14 -1 12 3.9 5.6
 14 -1 12 10.6 6.2
 -13 1 -12 12.9 11.2
 -13 1 -12 33.9 9.9
 -13 1 -12 29.4 12.6
 13 -1 12 11 7
 13 -1 12 19.8 6.1
 -12 1 -12 100.99 17.6
 -12 1 -12 101.59 18.5
 -12 1 -12 69.59 13.7
 -12 1 -12 73.79 17.4
 12 -1 12 85.59 12.4
 12 -1 12 81.49 10.3
 12 -1 12 95.09 11.6
 -11 1 -12 111.29 18.6
 -11 1 -12 77.59 14.1
 -11 1 -12 62.09 16.7
 -11 1 -12 90.79 16
 11 -1 12 92.79 11.3
 11 -1 12 65.99 9.9
 -10 1 -12 138.59 20.5
 -10 1 -12 138.09 23.1
 -10 1 -12 137.09 12.1
 -10 1 -12 155.38 22.1
 -10 1 -12 174.88 18
 10 -1 12 146.39 13.7
 10 -1 12 136.59 16.4
 10 -1 12 141.49 13
 -9 1 -12 267.27 24.3
 -9 1 -12 310.27 20.5
 -9 1 -12 275.87 26.9
 -9 1 -12 277.77 26.5
 -9 1 -12 293.37 24.4
 9 -1 12 308.47 23.5
 9 -1 12 296.87 20.8
 9 -1 12 298.47 20.8
 9 -1 12 285.57 19.5
 -8 1 -12 80.29 14.6
 -8 1 -12 91.19 16.5
 -8 1 -12 91.19 13.7
 -8 1 -12 91.99 10.4
 -8 1 -12 85.39 7
 -8 1 -12 94.99 13.8
 -8 1 -12 91.09 7.8
 -8 1 -12 91.19 7.8
 8 -1 12 104.09 11.1
 8 -1 12 86.29 12.4
 8 -1 12 95.69 9.1
 8 -1 12 88.59 9.8
 8 -1 12 69.69 9.7
 -7 1 -12 1151.38 65.79
 -7 1 -12 1096.89 62.59
 -7 1 -12 1137.79 61.59
 -7 1 -12 1212.48 64.49
 -7 1 -12 1113.59 61.79
 -7 1 -12 1188.18 66.69
 -7 1 -12 1091.79 68.89
 -7 1 -12 1030.2 67.49
 -7 1 -12 1171.98 64.09
 -7 1 -12 1147.09 66.29
 7 -1 12 1090.29 65.09
 7 -1 12 1205.98 65.09
 7 -1 12 1058.59 64.69
 7 -1 12 1144.99 64.79
 7 -1 12 1065.09 65.69
 7 -1 12 1190.38 62.49
 7 -1 12 1244.68 64.09
 -6 1 -12 81.19 11.4
 -6 1 -12 82.29 11.3
 -6 1 -12 71.89 11.2
 -6 1 -12 79.79 7.3
 -6 1 -12 52.79 11.5
 -6 1 -12 78.19 10
 -6 1 -12 73.19 11.9
 -6 1 -12 82.79 10.6
 6 -1 12 51.89 10.8
 6 -1 12 81.19 10.2
 6 -1 12 83.39 9.9
 6 -1 12 69.99 7.4
 6 -1 12 74.99 10
 6 -1 12 68.29 10.2
 -5 1 -12 396.56 24.5
 -5 1 -12 400.46 26
 -5 1 -12 387.66 29.3
 -5 1 -12 370.76 25.9
 -5 1 -12 404.16 26.7
 -5 1 -12 406.96 26.2
 -5 1 -12 436.46 23.6
 -5 1 -12 347.37 27.7
 5 -1 12 391.16 25.9
 5 -1 12 393.26 25.4
 5 -1 12 396.16 25.4
 5 -1 12 403.66 27.7
 5 -1 12 420.16 26
 5 -1 12 407.16 25.3
 5 -1 12 406.36 25.6
 -4 1 -12 135.59 12.5
 -4 1 -12 134.19 12.2
 -4 1 -12 119.69 12.3
 -4 1 -12 142.09 12.3
 -4 1 -12 130.59 10.8
 -4 1 -12 122.69 9.5
 -4 1 -12 147.19 11.8
 4 -1 12 119.19 10.7
 4 -1 12 126.69 11.6
 4 -1 12 122.59 13.6
 4 -1 12 134.99 11.1
 4 -1 12 123.49 11.5
 4 -1 12 127.79 11.5
 4 -1 12 112.59 11
 -3 1 -12 121.29 11.7
 -3 1 -12 118.29 7.5
 -3 1 -12 131.69 10.5
 -3 1 -12 117.19 9
 -3 1 -12 119.79 11.4
 -3 1 -12 134.99 12.5
 -3 1 -12 116.29 10.6
 3 -1 12 118.29 10.6
 3 -1 12 116.29 13.1
 3 -1 12 127.39 9.9
 3 -1 12 111.79 9.7
 3 -1 12 136.09 11.4
 3 -1 12 104.59 10.5
 3 -1 12 114.09 10.4
 -2 1 -12 348.57 19.6
 -2 1 -12 297.47 20.8
 -2 1 -12 322.97 17.9
 -2 1 -12 316.67 19.7
 -2 1 -12 323.07 21.2
 -2 1 -12 302.07 18.7
 2 -1 12 262.07 20.7
 2 -1 12 289.37 19.7
 2 -1 12 279.37 20.1
 2 -1 12 316.07 18.6
 2 -1 12 308.77 20.1
 2 -1 12 289.57 24
 -1 1 -12 35.1 5.9
 -1 1 -12 38.8 5.1
 -1 1 -12 27.6 6.2
 -1 1 -12 28 6.8
 -1 1 -12 31.7 4.8
 -1 1 -12 43.2 7.5
 -1 1 -12 40.9 4.2
 1 -1 12 33.8 5.5
 1 -1 12 29.3 5.9
 1 -1 12 33.1 4.1
 1 -1 12 31.7 4
 1 -1 12 50.09 8.7
 1 -1 12 32 5.9
 1 -1 12 34.3 6.3
 0 1 -12 1096.69 63.69
 0 1 -12 1172.88 61.09
 0 1 -12 1134.69 61.99
 0 1 -12 1214.38 62.59
 0 1 -12 1168.88 60.39
 0 1 -12 990 63.09
 0 1 -12 1215.48 63.89
 0 1 -12 950.7 62.39
 0 -1 12 1212.38 62.39
 0 -1 12 1123.59 64.39
 0 -1 12 1195.48 61.19
 0 -1 12 1153.18 60.79
 0 -1 12 1157.38 62.49
 0 -1 12 1197.58 62.39
 0 -1 12 1080.49 62.89
 1 1 -12 55.29 4.1
 1 1 -12 53.39 8.2
 1 1 -12 57.99 6.2
 1 1 -12 45.1 7
 1 1 -12 69.09 7.6
 1 1 -12 64.69 8
 1 1 -12 30.5 7
 -1 -1 12 55.79 7.6
 -1 -1 12 62.29 6.9
 -1 -1 12 56.29 7.2
 -1 -1 12 57.69 9.1
 -1 -1 12 65.49 6
 -1 -1 12 67.69 6.7
 -1 -1 12 64.49 6.6
 2 1 -12 6.3 4.1
 2 1 -12 8.7 4.5
 2 1 -12 9.6 4.7
 2 1 -12 12.3 5.1
 2 1 -12 10.2 3.7
 2 1 -12 8.6 3.8
 2 1 -12 13.9 5
 -2 -1 12 9.3 3.9
 -2 -1 12 12.2 3.7
 -2 -1 12 10 3.8
 -2 -1 12 8 5
 -2 -1 12 8.7 4.5
 -2 -1 12 8.4 3.7
 -2 -1 12 9 3.9
 -2 -1 12 11.3 4.2
 3 1 -12 106.29 9.4
 3 1 -12 92.49 10.5
 3 1 -12 97.89 10.2
 3 1 -12 110.09 6.2
 3 1 -12 112.09 9.9
 3 1 -12 115.59 11.3
 3 1 -12 119.59 10.2
 3 1 -12 99.19 10.3
 -3 -1 12 111.99 8.8
 -3 -1 12 106.79 10
 -3 -1 12 119.69 9.9
 -3 -1 12 110.09 9
 -3 -1 12 114.59 8.6
 -3 -1 12 108.19 11.1
 -3 -1 12 98.09 9.9
 -3 -1 12 113.79 7.7
 -3 -1 12 140.59 10.8
 4 1 -12 534.85 29.4
 4 1 -12 562.84 32.9
 4 1 -12 549.65 32.8
 4 1 -12 457.85 32.3
 4 1 -12 547.25 34.3
 4 1 -12 562.14 31.7
 4 1 -12 542.35 33
 4 1 -12 577.34 32
 -4 -1 12 495.85 32.4
 -4 -1 12 561.84 30.5
 -4 -1 12 495.95 32.7
 -4 -1 12 542.85 30.3
 -4 -1 12 542.75 33.1
 -4 -1 12 576.54 32.9
 -4 -1 12 558.64 30.4
 -4 -1 12 540.55 31.5
 -4 -1 12 618.74 33.2
 -4 -1 12 552.84 31.9
 5 1 -12 291.77 16.4
 5 1 -12 257.67 18.7
 5 1 -12 271.97 18.3
 5 1 -12 276.07 18.9
 5 1 -12 269.77 19.2
 5 1 -12 305.57 19.2
 5 1 -12 288.87 21
 5 1 -12 288.47 17.8
 5 1 -12 287.27 18
 -5 -1 12 224.68 19.1
 -5 -1 12 292.37 17.8
 -5 -1 12 265.07 18.7
 -5 -1 12 273.67 17.1
 -5 -1 12 270.07 15.4
 -5 -1 12 254.17 15.3
 -5 -1 12 262.67 17.7
 -5 -1 12 263.27 19.3
 -5 -1 12 270.77 19.4
 -5 -1 12 240.58 19
 -5 -1 12 284.67 18.2
 6 1 -12 605.64 39.3
 6 1 -12 592.34 36.2
 6 1 -12 637.74 36.9
 6 1 -12 662.83 35.5
 6 1 -12 618.64 39.7
 6 1 -12 679.43 35.7
 6 1 -12 647.84 36.8
 6 1 -12 621.64 34.7
 6 1 -12 729.53 37.1
 6 1 -12 515.85 38.2
 -6 -1 12 584.24 37.5
 -6 -1 12 611.34 35.3
 -6 -1 12 619.34 36.2
 -6 -1 12 580.84 37.3
 -6 -1 12 550.54 37.2
 -6 -1 12 614.24 35.8
 -6 -1 12 557.54 35.5
 -6 -1 12 635.14 35
 7 1 -12 1178.38 59.69
 7 1 -12 1156.28 61.99
 7 1 -12 1079.39 60.29
 7 1 -12 1051.59 64.09
 7 1 -12 1212.58 61.09
 7 1 -12 1110.29 58.39
 7 1 -12 1068.09 63.59
 7 1 -12 1145.69 60.69
 7 1 -12 1064.49 59.29
 7 1 -12 1165.58 60.39
 7 1 -12 1083.69 59.19
 -7 -1 12 1002 58.19
 -7 -1 12 934.41 61.69
 -7 -1 12 927.91 59.49
 -7 -1 12 1111.29 60.99
 -7 -1 12 1034.2 62.29
 -7 -1 12 1029 61.89
 -7 -1 12 1098.39 59.89
 8 1 -12 385.86 22.8
 8 1 -12 362.36 22.8
 8 1 -12 369.46 21.8
 8 1 -12 343.67 21.5
 8 1 -12 384.86 22.8
 8 1 -12 347.67 24.8
 8 1 -12 400.86 23.5
 -8 -1 12 347.17 24.5
 -8 -1 12 325.37 25.3
 -8 -1 12 316.57 25.4
 -8 -1 12 330.97 19.6
 -8 -1 12 335.67 19.8
 -8 -1 12 343.87 23.2
 9 1 -12 42.6 7.3
 9 1 -12 37.2 7.3
 9 1 -12 34.9 5.9
 9 1 -12 31.8 8.2
 9 1 -12 30.6 6
 9 1 -12 33.3 6
 9 1 -12 34.8 6.1
 9 1 -12 39.5 5.3
 -9 -1 12 30.7 8.7
 -9 -1 12 37 10.3
 -9 -1 12 22.4 6.9
 -9 -1 12 34.6 9.7
 -9 -1 12 29.2 9.5
 10 1 -12 83.69 8.9
 10 1 -12 73.49 7.5
 10 1 -12 71.99 9.8
 10 1 -12 95.39 9.9
 10 1 -12 77.69 7.5
 10 1 -12 72.29 7.8
 10 1 -12 68.09 9.1
 -10 -1 12 84.59 11.5
 -10 -1 12 89.69 12.6
 -10 -1 12 103.09 15.8
 -10 -1 12 50.79 14.3
 -10 -1 12 86.19 13.9
 11 1 -12 1.7 4.4
 11 1 -12 12.4 8
 11 1 -12 -6.5 4.7
 11 1 -12 13.5 4.9
 11 1 -12 10.6 3
 11 1 -12 3.7 3.3
 11 1 -12 8.3 2.8
 -11 -1 12 14.9 8.2
 -11 -1 12 13.7 8.7
 -11 -1 12 3.3 8.6
 12 1 -12 175.18 19.5
 12 1 -12 174.28 13.6
 12 1 -12 188.78 14.6
 -12 -1 12 178.98 19.2
 -12 -1 12 162.58 20.2
 -12 -1 12 165.18 19.2
 13 1 -12 34.5 10.4
 13 1 -12 38.1 6.8
 13 1 -12 20 5.5
 -13 -1 12 31 10.4
 -13 -1 12 36 11.3
 -13 -1 12 36 11.5
 14 1 -12 7.4 8.9
 -14 -1 12 22.2 12.5
 -14 1 -11 29.5 9.8
 -14 1 -11 38.9 14.9
 -14 1 -11 29 13.8
 14 -1 11 43.9 7.7
 14 -1 11 16.4 6.4
 -13 1 -11 89.59 18.8
 -13 1 -11 97.19 17.5
 -13 1 -11 87.39 19.1
 -13 1 -11 102.29 14.9
 13 -1 11 95.79 12.5
 13 -1 11 121.79 11.5
 -12 1 -11 35.1 13
 -12 1 -11 22.1 11.2
 -12 1 -11 30.1 11.8
 -12 1 -11 40.7 10.4
 12 -1 11 32.7 7
 12 -1 11 24.7 7.2
 12 -1 11 19.9 6.1
 -11 1 -11 84.99 8.8
 -11 1 -11 91.89 14.6
 -11 1 -11 82.99 7.6
 -11 1 -11 96.39 15.9
 -11 1 -11 82.39 17
 -11 1 -11 111.99 18.8
 11 -1 11 72.69 9.8
 11 -1 11 82.29 10.6
 11 -1 11 69.09 11.5
 -10 1 -11 66.89 15.4
 -10 1 -11 82.39 13.5
 -10 1 -11 52.19 12.5
 -10 1 -11 83.19 16.1
 10 -1 11 63.69 9.1
 10 -1 11 77.89 11.8
 10 -1 11 80.29 10.1
 -9 1 -11 216.18 15.6
 -9 1 -11 205.98 20.4
 -9 1 -11 207.18 24.3
 -9 1 -11 167.18 14.4
 -9 1 -11 223.48 20.2
 -9 1 -11 215.58 22.7
 9 -1 11 214.38 15.5
 9 -1 11 218.88 18.6
 9 -1 11 204.68 16.1
 9 -1 11 249.78 16.7
 9 -1 11 196.58 16.1
 -8 1 -11 154.88 12.6
 -8 1 -11 169.18 13.4
 -8 1 -11 176.38 19
 -8 1 -11 149.49 10.9
 -8 1 -11 167.08 21.2
 -8 1 -11 149.99 16.2
 -8 1 -11 147.69 9.4
 -8 1 -11 146.99 16.3
 -8 1 -11 170.38 17.3
 8 -1 11 179.78 13.8
 8 -1 11 149.69 12.3
 8 -1 11 149.29 15.3
 8 -1 11 165.78 13.5
 8 -1 11 177.18 14.5
 8 -1 11 145.59 15.4
 -7 1 -11 1181.48 62.99
 -7 1 -11 1177.78 61.29
 -7 1 -11 1068.99 67.69
 -7 1 -11 1115.29 64.39
 -7 1 -11 1103.99 65.19
 -7 1 -11 1070.09 60.39
 -7 1 -11 1131.09 64.79
 -7 1 -11 1095.39 65.09
 -7 1 -11 1056.49 66.59
 -7 1 -11 1123.19 60.49
 7 -1 11 1146.79 64.09
 7 -1 11 1033.9 63.59
 7 -1 11 1029.8 66.39
 7 -1 11 1206.08 61.69
 7 -1 11 1249.28 62.89
 7 -1 11 1163.58 62.99
 7 -1 11 1124.09 62.79
 7 -1 11 1062.79 64.39
 7 -1 11 1110.39 63.59
 -6 1 -11 17.5 5.4
 -6 1 -11 20.7 4.9
 -6 1 -11 27.8 7.6
 -6 1 -11 17.8 7.3
 -6 1 -11 14.6 8.4
 -6 1 -11 35.3 6.8
 -6 1 -11 18.9 7.4
 -6 1 -11 23 6
 -6 1 -11 20.6 4.1
 6 -1 11 15.6 7.1
 6 -1 11 23.6 6.6
 6 -1 11 21 4.6
 6 -1 11 25.7 6.4
 6 -1 11 25.7 6.1
 6 -1 11 20.7 5.6
 6 -1 11 37.2 7.6
 -5 1 -11 192.08 16.5
 -5 1 -11 193.78 14.7
 -5 1 -11 197.08 15
 -5 1 -11 196.18 12.5
 -5 1 -11 165.08 15.1
 -5 1 -11 193.78 14.7
 -5 1 -11 193.08 16.3
 -5 1 -11 156.18 16.5
 5 -1 11 175.48 15
 5 -1 11 171.88 16
 5 -1 11 183.08 14
 5 -1 11 199.58 15
 5 -1 11 174.38 14.1
 5 -1 11 200.78 14.4
 5 -1 11 206.08 15
 -4 1 -11 4.4 4.7
 -4 1 -11 -0.1 4.1
 -4 1 -11 5.9 4.3
 -4 1 -11 0.8 2.3
 -4 1 -11 1.3 3.8
 -4 1 -11 2.3 4.2
 -4 1 -11 2.2 3.2
 4 -1 11 8 4.3
 4 -1 11 -0.1 3.2
 4 -1 11 3.1 4.1
 4 -1 11 7.9 5.4
 4 -1 11 1.4 3.5
 4 -1 11 1.5 3.5
 4 -1 11 1.6 3.6
 -3 1 -11 760.32 42.2
 -3 1 -11 802.52 44.8
 -3 1 -11 790.62 43.6
 -3 1 -11 794.22 44.6
 -3 1 -11 838.12 46.2
 -3 1 -11 844.82 45.4
 -3 1 -11 810.02 46.1
 -3 1 -11 854.11 46.3
 3 -1 11 684.83 44.5
 3 -1 11 862.21 44.8
 3 -1 11 760.22 45.2
 3 -1 11 813.72 45.4
 -2 1 -11 205.08 13.2
 -2 1 -11 203.38 14.6
 -2 1 -11 167.98 14
 -2 1 -11 178.78 14.3
 -2 1 -11 188.18 11.3
 -2 1 -11 186.68 12.8
 -2 1 -11 181.28 12
 2 -1 11 182.28 13.8
 2 -1 11 173.58 13.3
 2 -1 11 152.38 12.8
 2 -1 11 176.38 13.2
 2 -1 11 178.58 12.2
 2 -1 11 198.88 15.5
 -1 1 -11 143.99 9.9
 -1 1 -11 153.58 11
 -1 1 -11 139.19 8.8
 -1 1 -11 142.29 12
 -1 1 -11 141.79 9.8
 -1 1 -11 130.59 11.9
 -1 1 -11 140.89 12.2
 1 -1 11 138.99 9.2
 1 -1 11 137.79 10.7
 1 -1 11 146.09 9
 1 -1 11 121.09 10.7
 1 -1 11 154.48 13.3
 1 -1 11 117.49 10.5
 1 -1 11 134.79 11.3
 0 1 -11 3036.6 157.98
 0 1 -11 3281.77 160.78
 0 1 -11 3173.28 159.08
 0 1 -11 2625.24 159.78
 0 1 -11 2551.14 159.18
 0 1 -11 3122.49 157.58
 0 1 -11 3116.59 159.38
 0 -1 11 3151.68 159.18
 0 -1 11 2996.5 158.08
 0 -1 11 3026.1 159.98
 0 -1 11 3076.69 159.18
 0 -1 11 3014.1 159.38
 0 -1 11 3177.78 161.38
 0 -1 11 2996.4 156.78
 1 1 -11 63.59 4.2
 1 1 -11 56.79 8
 1 1 -11 68.09 8.2
 1 1 -11 63.59 6.2
 1 1 -11 47.1 6.9
 1 1 -11 44.7 7.5
 1 1 -11 58.49 6.7
 1 1 -11 73.69 7.5
 -1 -1 11 51.49 8.2
 -1 -1 11 62.39 6.4
 -1 -1 11 68.99 6
 -1 -1 11 69.79 7.2
 -1 -1 11 57.69 6.3
 -1 -1 11 60.29 6.6
 2 1 -11 1431.56 77.89
 2 1 -11 1468.75 78.19
 2 1 -11 1464.35 77.99
 2 1 -11 1393.06 76.59
 2 1 -11 1383.26 77.69
 2 1 -11 1376.26 76.79
 2 1 -11 1296.67 77.29
 -2 -1 11 1535.25 77.89
 -2 -1 11 1498.15 76.89
 -2 -1 11 1355.46 76.69
 -2 -1 11 1433.46 76.39
 -2 -1 11 1407.16 76.19
 -2 -1 11 1472.45 76.39
 -2 -1 11 1409.56 78.29
 -2 -1 11 1459.05 77.29
 3 1 -11 185.68 10.5
 3 1 -11 183.88 13.4
 3 1 -11 185.28 14.1
 3 1 -11 181.68 13.1
 3 1 -11 197.98 14.6
 3 1 -11 182.98 12.8
 3 1 -11 170.38 14.5
 3 1 -11 149.69 14.1
 -3 -1 11 188.78 12.3
 -3 -1 11 192.18 17.3
 -3 -1 11 199.38 11.6
 -3 -1 11 227.98 14.1
 -3 -1 11 187.08 12.2
 -3 -1 11 188.88 14.6
 -3 -1 11 173.08 13.2
 -3 -1 11 186.08 13.8
 4 1 -11 1703.93 89.19
 4 1 -11 1690.53 88.79
 4 1 -11 1603.94 87.69
 4 1 -11 1743.43 87.99
 4 1 -11 1398.86 88.19
 4 1 -11 1674.63 86.19
 4 1 -11 1602.44 88.89
 4 1 -11 1662.03 90.59
 -4 -1 11 1729.13 88.89
 -4 -1 11 1420.16 88.79
 -4 -1 11 1682.03 88.89
 -4 -1 11 1667.63 86.49
 -4 -1 11 1583.64 86.69
 -4 -1 11 1651.73 89.09
 -4 -1 11 1536.95 88.49
 -4 -1 11 1702.83 89.09
 -4 -1 11 1726.83 88.09
 -4 -1 11 1740.63 86.49
 5 1 -11 2.3 4
 5 1 -11 -5.1 3.4
 5 1 -11 4.5 5.1
 5 1 -11 9.5 4.4
 5 1 -11 3.3 3.6
 5 1 -11 0.8 3.3
 5 1 -11 10.2 4.4
 5 1 -11 2.8 2.9
 5 1 -11 5.2 2.7
 -5 -1 11 -0.4 4.1
 -5 -1 11 1.4 4.5
 -5 -1 11 4.2 4
 -5 -1 11 6.4 1.5
 -5 -1 11 5.2 4.8
 -5 -1 11 4.8 4.9
 -5 -1 11 3.7 1.6
 -5 -1 11 4 3
 -5 -1 11 2.9 3.2
 -5 -1 11 3.2 2.4
 -5 -1 11 -0.2 4.6
 6 1 -11 134.69 9.8
 6 1 -11 135.19 11.7
 6 1 -11 140.79 12.6
 6 1 -11 149.88 10.8
 6 1 -11 146.89 12
 6 1 -11 153.48 14.7
 6 1 -11 150.38 13.1
 6 1 -11 160.68 12.1
 6 1 -11 120.49 13.3
 6 1 -11 178.08 11.6
 6 1 -11 136.19 10.6
 6 1 -11 176.78 12.5
 -6 -1 11 123.29 10.1
 -6 -1 11 135.69 11.3
 -6 -1 11 130.99 11
 -6 -1 11 133.99 13.4
 -6 -1 11 143.39 11.4
 -6 -1 11 156.38 12.4
 -6 -1 11 133.19 13.3
 -6 -1 11 131.49 13.3
 7 1 -11 22.4 6.3
 7 1 -11 21.6 5.4
 7 1 -11 29.3 5.1
 7 1 -11 39.8 9.2
 7 1 -11 34.6 5.2
 7 1 -11 28.2 5.2
 7 1 -11 23.9 5.4
 7 1 -11 29.1 5.8
 7 1 -11 26.5 6.2
 7 1 -11 15.7 6.2
 -7 -1 11 11.5 5.3
 -7 -1 11 16.3 7.6
 -7 -1 11 14.8 7.2
 -7 -1 11 22 5.2
 -7 -1 11 16.7 7.6
 -7 -1 11 24.8 4.2
 -7 -1 11 31.1 4.1
 -7 -1 11 21.7 6.8
 8 1 -11 11.3 4.2
 8 1 -11 6.2 3.7
 8 1 -11 13.1 4.3
 8 1 -11 3.9 4.3
 8 1 -11 8.6 4.7
 8 1 -11 9.6 5.9
 8 1 -11 8.7 3.4
 8 1 -11 7.7 4
 8 1 -11 8.3 5.2
 8 1 -11 0.3 5.9
 -8 -1 11 6.8 1.4
 -8 -1 11 15 6.7
 -8 -1 11 9.6 7.2
 -8 -1 11 -1.3 6.2
 -8 -1 11 -1.1 6.7
 -8 -1 11 4 5.1
 9 1 -11 12.3 3.4
 9 1 -11 15.9 5.2
 9 1 -11 11.7 3.8
 9 1 -11 18.7 5.4
 9 1 -11 16.1 5.1
 9 1 -11 22 4.6
 9 1 -11 8.4 5.6
 -9 -1 11 15.3 7.4
 -9 -1 11 18.3 8.4
 -9 -1 11 16 6.5
 -9 -1 11 7.5 7.4
 -9 -1 11 -0.7 7.3
 10 1 -11 32.5 4.7
 10 1 -11 31.5 6
 10 1 -11 38.7 4.8
 10 1 -11 28.2 6.7
 10 1 -11 32.4 9.9
 10 1 -11 34.1 5.1
 10 1 -11 13.3 5.5
 10 1 -11 27.3 6
 -10 -1 11 32.6 10.1
 -10 -1 11 29 9.6
 -10 -1 11 29.7 8.9
 -10 -1 11 15.6 7.3
 -10 -1 11 20.3 9.4
 11 1 -11 101.59 12.2
 11 1 -11 132.19 11
 11 1 -11 120.89 8
 11 1 -11 102.89 17.6
 11 1 -11 124.09 8.1
 11 1 -11 114.59 10.9
 11 1 -11 128.79 9.6
 -11 -1 11 101.09 16.9
 -11 -1 11 132.99 20.2
 12 1 -11 45.3 7.4
 12 1 -11 23.2 9.1
 12 1 -11 31.4 6.1
 12 1 -11 36.1 4.9
 -12 -1 11 38.1 11.7
 -12 -1 11 31.6 11.1
 -12 -1 11 32.2 10.5
 13 1 -11 6.3 4
 13 1 -11 -2.2 3.8
 13 1 -11 5.9 8.4
 -13 -1 11 23.8 9.4
 -13 -1 11 14.8 9.5
 14 1 -11 3.9 8.5
 -14 1 -10 5.3 7.5
 -14 1 -10 15.1 13.2
 -14 1 -10 7.1 12.5
 14 -1 10 0.4 4.3
 14 -1 10 4.6 4.6
 -13 1 -10 -14.5 9.4
 -13 1 -10 -21.5 8.1
 -13 1 -10 -22.2 7.2
 -13 1 -10 14.4 8.1
 13 -1 10 9.8 6.1
 13 -1 10 14 5.2
 -12 1 -10 25.1 12.4
 -12 1 -10 10 6.7
 -12 1 -10 10.4 10.5
 -12 1 -10 -1.2 8.8
 12 -1 10 3.6 5
 12 -1 10 -4.3 3.1
 12 -1 10 4.1 6.2
 12 -1 10 0 4.2
 -11 1 -10 23.1 4.8
 -11 1 -10 26.3 3.6
 -11 1 -10 20.2 10.4
 -11 1 -10 22.2 9.2
 -11 1 -10 43.6 12.7
 -11 1 -10 11.7 13
 11 -1 10 27.5 6.6
 11 -1 10 23.8 4.5
 11 -1 10 26.7 7.8
 11 -1 10 18.7 5.5
 -10 1 -10 139.39 18.7
 -10 1 -10 191.18 12.8
 -10 1 -10 174.68 12.3
 -10 1 -10 187.18 18.6
 -10 1 -10 194.68 21.5
 -10 1 -10 200.38 23.9
 10 -1 10 171.38 14.2
 10 -1 10 146.19 14.6
 10 -1 10 173.78 16.3
 10 -1 10 174.98 14
 10 -1 10 175.58 14.3
 10 -1 10 190.58 11.8
 -9 1 -10 220.88 23.3
 -9 1 -10 231.48 21.6
 -9 1 -10 276.07 25.3
 -9 1 -10 223.38 16
 -9 1 -10 250.67 21.6
 -9 1 -10 237.38 16.4
 9 -1 10 249.58 20.5
 9 -1 10 238.38 14.4
 9 -1 10 246.78 17
 9 -1 10 254.27 17.4
 9 -1 10 240.08 19.3
 9 -1 10 231.38 17.2
 -8 1 -10 16.2 9.4
 -8 1 -10 18.6 8.5
 -8 1 -10 25.9 5.4
 -8 1 -10 22.1 8.7
 -8 1 -10 19.5 8.6
 -8 1 -10 20.8 3.9
 -8 1 -10 21.1 5.4
 -8 1 -10 33.7 11.1
 8 -1 10 24.3 5.7
 8 -1 10 28.8 6.1
 8 -1 10 31.1 8.2
 8 -1 10 17.9 7.1
 8 -1 10 28.9 3.5
 8 -1 10 30.9 6
 8 -1 10 32.6 9.2
 8 -1 10 32.7 7.1
 8 -1 10 29.1 5.9
 8 -1 10 18.4 6.8
 8 -1 10 26.2 6.9
 -7 1 -10 665.83 42.2
 -7 1 -10 708.83 40.1
 -7 1 -10 600.84 42.2
 -7 1 -10 680.23 44.5
 -7 1 -10 706.83 38.2
 -7 1 -10 660.13 37.7
 -7 1 -10 732.53 45.8
 -7 1 -10 702.43 40.2
 -7 1 -10 720.63 38.3
 7 -1 10 688.63 40.2
 7 -1 10 720.03 39.4
 7 -1 10 704.53 42.6
 7 -1 10 678.33 43.4
 7 -1 10 733.33 44
 7 -1 10 656.93 41.1
 7 -1 10 711.13 36.4
 7 -1 10 614.54 41.4
 7 -1 10 689.33 42
 7 -1 10 734.43 40.6
 -6 1 -10 397.06 26.1
 -6 1 -10 369.56 24.2
 -6 1 -10 424.16 25
 -6 1 -10 439.76 24.1
 -6 1 -10 355.36 26.1
 -6 1 -10 383.46 22.4
 -6 1 -10 411.06 27
 -6 1 -10 312.87 26.8
 -6 1 -10 401.96 22.9
 6 -1 10 409.36 25.9
 6 -1 10 383.16 25.7
 6 -1 10 374.16 24.8
 6 -1 10 357.06 24.9
 6 -1 10 423.46 24.4
 6 -1 10 337.67 25.5
 6 -1 10 384.76 24.4
 6 -1 10 375.76 23
 -5 1 -10 423.36 25.5
 -5 1 -10 416.66 26.7
 -5 1 -10 433.46 24.7
 -5 1 -10 416.96 28.8
 -5 1 -10 448.96 28.4
 -5 1 -10 388.76 28.7
 -5 1 -10 457.75 26.8
 -5 1 -10 476.15 27.3
 5 -1 10 430.56 26.2
 5 -1 10 435.46 26.8
 5 -1 10 426.16 26.6
 5 -1 10 459.95 27.6
 5 -1 10 397.56 27.8
 5 -1 10 416.16 26.9
 5 -1 10 448.06 27.4
 5 -1 10 465.65 26.9
 -4 1 -10 99.99 10
 -4 1 -10 100.29 9.6
 -4 1 -10 71.39 10.4
 -4 1 -10 75.49 8.9
 -4 1 -10 88.89 9
 -4 1 -10 101.09 9.8
 -4 1 -10 102.79 7.3
 -4 1 -10 93.89 8.3
 4 -1 10 94.79 9.2
 4 -1 10 89.29 8.6
 4 -1 10 84.49 8.8
 4 -1 10 88.89 8.9
 4 -1 10 85.19 8.7
 4 -1 10 98.89 9.1
 4 -1 10 99.39 9.1
 4 -1 10 74.19 10.6
 -3 1 -10 14 4.9
 -3 1 -10 12.2 4.4
 -3 1 -10 13.5 3
 -3 1 -10 11.3 4.2
 -3 1 -10 20.8 5
 -3 1 -10 15.3 4.8
 3 -1 10 21.2 4.9
 3 -1 10 11.2 5.4
 3 -1 10 10.6 4
 3 -1 10 10.5 4.2
 3 -1 10 19.3 4.7
 3 -1 10 14.9 4.2
 3 -1 10 7.6 4
 -2 1 -10 3917.11 205.78
 -2 1 -10 4118.99 204.18
 -2 1 -10 3951.1 204.78
 -2 1 -10 4336.47 204.78
 -2 1 -10 4034 205.78
 -2 1 -10 3825.72 203.58
 -2 1 -10 3723.93 205.68
 2 -1 10 3897.41 206.48
 2 -1 10 3992.4 204.08
 2 -1 10 3740.13 205.18
 2 -1 10 3911.81 205.08
 2 -1 10 3405.16 204.28
 2 -1 10 3933.91 205.18
 -1 1 -10 309.27 18.3
 -1 1 -10 311.07 20.2
 -1 1 -10 299.37 17.3
 -1 1 -10 328.07 18.2
 -1 1 -10 320.67 20.4
 -1 1 -10 308.57 19
 1 -1 10 312.97 17.4
 1 -1 10 309.17 19.8
 1 -1 10 341.17 21.4
 1 -1 10 266.37 18.8
 1 -1 10 294.47 17.7
 1 -1 10 331.17 19.4
 1 -1 10 292.17 19.3
 0 1 -10 813.22 41.2
 0 1 -10 775.42 41.9
 0 1 -10 659.33 42.3
 0 1 -10 724.03 43.3
 0 1 -10 808.12 43.4
 0 1 -10 669.63 42.7
 0 1 -10 790.42 40.6
 0 1 -10 787.62 42.3
 0 -1 10 690.93 41.9
 0 -1 10 743.93 42.4
 0 -1 10 791.02 41.2
 0 -1 10 778.72 40
 0 -1 10 757.82 42.1
 0 -1 10 758.42 45.3
 0 -1 10 828.92 44.3
 1 1 -10 898.11 47.6
 1 1 -10 850.81 48.8
 1 1 -10 877.21 47.1
 1 1 -10 899.01 48.7
 1 1 -10 755.82 48
 1 1 -10 894.11 45.3
 1 1 -10 885.91 48
 1 1 -10 764.92 47.4
 -1 -1 10 890.01 48.2
 -1 -1 10 866.21 47.1
 -1 -1 10 900.71 47.3
 -1 -1 10 846.12 46.6
 -1 -1 10 907.71 47.4
 -1 -1 10 869.91 49.2
 -1 -1 10 849.72 47.4
 2 1 -10 1981.1 116.39
 2 1 -10 2092.69 115.69
 2 1 -10 2271.47 115.99
 2 1 -10 2319.17 113.39
 2 1 -10 2150.88 116.59
 2 1 -10 2317.07 117.19
 2 1 -10 2117.19 116.99
 2 1 -10 2202.18 115.89
 -2 -1 10 2186.58 116.29
 -2 -1 10 2163.88 115.29
 -2 -1 10 2323.27 115.99
 -2 -1 10 2221.58 117.39
 -2 -1 10 2114.69 115.49
 -2 -1 10 2204.18 115.49
 -2 -1 10 2113.39 115.89
 -2 -1 10 2240.58 115.49
 3 1 -10 714.63 41.5
 3 1 -10 795.22 39.1
 3 1 -10 725.23 41.5
 3 1 -10 718.73 40.8
 3 1 -10 736.73 40.8
 3 1 -10 769.72 42.9
 3 1 -10 731.73 42.1
 3 1 -10 649.83 41.4
 -3 -1 10 681.23 41.5
 -3 -1 10 728.93 39.6
 -3 -1 10 748.93 41.2
 -3 -1 10 756.22 40.2
 -3 -1 10 766.92 40.2
 -3 -1 10 671.93 41
 -3 -1 10 777.82 40.8
 -3 -1 10 790.22 41.6
 -3 -1 10 737.03 42.2
 4 1 -10 64.69 7.8
 4 1 -10 94.79 11
 4 1 -10 77.29 8.1
 4 1 -10 71.79 7.7
 4 1 -10 61.89 5.4
 4 1 -10 48.1 7
 4 1 -10 59.59 6.4
 4 1 -10 75.79 6.9
 -4 -1 10 49.8 7.6
 -4 -1 10 48.4 7.2
 -4 -1 10 73.39 8.1
 -4 -1 10 79.99 8.4
 -4 -1 10 63.99 6
 -4 -1 10 65.19 5.2
 -4 -1 10 61.29 6.5
 -4 -1 10 57.69 5.3
 5 1 -10 85.99 7.3
 5 1 -10 102.79 9.5
 5 1 -10 83.09 6.4
 5 1 -10 90.89 11.5
 5 1 -10 82.99 8.5
 5 1 -10 79.89 8.2
 5 1 -10 104.89 8
 5 1 -10 86.39 7.3
 5 1 -10 86.09 8.4
 -5 -1 10 73.99 9.7
 -5 -1 10 79.99 7.8
 -5 -1 10 90.69 7.4
 -5 -1 10 84.89 8.4
 -5 -1 10 84.19 9.4
 -5 -1 10 77.49 4.7
 -5 -1 10 88.29 7.8
 -5 -1 10 89.29 9.9
 -5 -1 10 89.19 8.5
 -5 -1 10 55.99 8.5
 6 1 -10 72.09 9.9
 6 1 -10 83.19 7.8
 6 1 -10 80.79 7.1
 6 1 -10 88.09 9.7
 6 1 -10 74.39 8.5
 6 1 -10 95.49 8.2
 6 1 -10 91.89 8.9
 6 1 -10 83.99 8.4
 6 1 -10 68.39 11.1
 6 1 -10 75.39 11.3
 6 1 -10 78.99 8.4
 6 1 -10 88.59 7.4
 6 1 -10 80.09 8.3
 -6 -1 10 84.49 10.9
 -6 -1 10 54.29 9.4
 -6 -1 10 81.49 9.1
 -6 -1 10 70.39 8.2
 -6 -1 10 92.09 11.2
 -6 -1 10 80.39 10.6
 -6 -1 10 78.79 6.7
 7 1 -10 433.96 25.1
 7 1 -10 434.46 25.9
 7 1 -10 453.35 24.7
 7 1 -10 423.46 25
 7 1 -10 434.26 26.5
 7 1 -10 385.76 24.4
 7 1 -10 462.75 26.4
 7 1 -10 388.46 28.3
 7 1 -10 403.56 23.9
 7 1 -10 425.26 24.8
 7 1 -10 426.66 27.2
 -7 -1 10 414.46 25.6
 -7 -1 10 327.17 26.6
 -7 -1 10 384.96 27.4
 -7 -1 10 377.66 23
 -7 -1 10 406.46 27.3
 -7 -1 10 405.56 22.9
 -7 -1 10 405.86 26.3
 8 1 -10 79.09 7.8
 8 1 -10 63.29 8.6
 8 1 -10 72.79 8.1
 8 1 -10 63.79 9.5
 8 1 -10 68.69 8.4
 8 1 -10 62.79 6.9
 8 1 -10 60.49 6.3
 8 1 -10 73.99 11.9
 8 1 -10 62.49 11.2
 8 1 -10 59.79 8.6
 8 1 -10 66.89 7.3
 -8 -1 10 54.09 11.2
 -8 -1 10 65.09 11.3
 -8 -1 10 60.49 10
 -8 -1 10 41 9.7
 -8 -1 10 64.59 9.3
 9 1 -10 47 7.4
 9 1 -10 48.4 6.6
 9 1 -10 44.5 6.6
 9 1 -10 45.6 5.8
 9 1 -10 42.9 5.5
 9 1 -10 40.5 7.6
 9 1 -10 44 5.4
 -9 -1 10 40.8 9.2
 -9 -1 10 42.6 9.7
 -9 -1 10 54.59 9.1
 -9 -1 10 42.5 9.9
 -9 -1 10 42.5 10.6
 10 1 -10 432.96 24.7
 10 1 -10 434.66 25.9
 10 1 -10 392.56 26.9
 10 1 -10 472.55 31.5
 10 1 -10 434.46 24.2
 10 1 -10 449.66 24.3
 10 1 -10 349.47 31.3
 10 1 -10 434.96 26
 10 1 -10 413.86 30
 -10 -1 10 427.16 28.5
 -10 -1 10 459.75 30.2
 -10 -1 10 390.26 30.5
 -10 -1 10 443.46 31.2
 -10 -1 10 389.56 30
 11 1 -10 56.59 9
 11 1 -10 70.49 8.1
 11 1 -10 51.19 5.8
 11 1 -10 48.1 6.9
 11 1 -10 63.09 11.9
 -11 -1 10 79.49 11.8
 -11 -1 10 48.1 17.4
 -11 -1 10 39.2 11
 -11 -1 10 40.2 10.9
 12 1 -10 1 4.1
 12 1 -10 3.4 2.4
 12 1 -10 3.4 7.5
 12 1 -10 9.1 4
 -12 -1 10 8.8 8.3
 -12 -1 10 20.5 9.9
 -12 -1 10 13 8.6
 13 1 -10 7.6 3.4
 13 1 -10 -0.2 3.8
 13 1 -10 -2.6 7.3
 -13 -1 10 -1.9 8.7
 -13 -1 10 -2.5 7.7
 14 1 -10 85.39 8.7
 14 1 -10 84.19 14.2
 -14 1 -9 -1 7
 -14 1 -9 -18.6 9.1
 -14 1 -9 -4.3 11.4
 14 -1 9 7.5 5
 14 -1 9 3 3.8
 -13 1 -9 10.8 7.9
 -13 1 -9 -8 9.3
 -13 1 -9 -7.8 9.9
 13 -1 9 0 3.6
 13 -1 9 10.3 6.3
 13 -1 9 6.5 4.4
 -12 1 -9 48.8 11.1
 -12 1 -9 42 13.3
 -12 1 -9 37.6 13.2
 -12 1 -9 46.3 13.8
 12 -1 9 28.1 6.1
 12 -1 9 48.5 7.3
 12 -1 9 22.8 5.4
 12 -1 9 40.6 8.1
 -11 1 -9 0.7 7.7
 -11 1 -9 9.5 10.8
 -11 1 -9 -10.2 8.5
 -11 1 -9 -4.4 8.1
 11 -1 9 13.8 5.9
 11 -1 9 2.9 2.2
 11 -1 9 -6.8 3.4
 11 -1 9 4.1 3.2
 11 -1 9 2.8 3.8
 11 -1 9 -1.9 4.2
 -10 1 -9 25.5 11.4
 -10 1 -9 25.9 4.3
 -10 1 -9 38.8 12.5
 -10 1 -9 28 9.5
 -10 1 -9 30.4 4.4
 -10 1 -9 26.9 10.1
 10 -1 9 35.8 4.9
 10 -1 9 33 6.8
 10 -1 9 20.2 5.4
 10 -1 9 28.9 3.9
 10 -1 9 26 7.6
 10 -1 9 25.5 5.9
 -9 1 -9 66.89 14.4
 -9 1 -9 72.19 12.3
 -9 1 -9 68.99 7.2
 -9 1 -9 76.09 14.1
 -9 1 -9 67.59 12.2
 -9 1 -9 73.19 12.8
 9 -1 9 79.69 10.6
 9 -1 9 68.99 6.5
 9 -1 9 77.29 10.5
 9 -1 9 78.59 8.5
 9 -1 9 73.09 9.3
 9 -1 9 77.49 8.7
 9 -1 9 77.39 8.4
 9 -1 9 73.49 6.3
 -8 1 -9 2.5 7.2
 -8 1 -9 5.3 6.9
 -8 1 -9 -3.2 6.3
 -8 1 -9 -2.7 7.4
 -8 1 -9 -0.3 3.3
 -8 1 -9 8.3 3.6
 -8 1 -9 -0.5 8.1
 8 -1 9 -0.3 5.1
 8 -1 9 1.9 3.6
 8 -1 9 4.7 4.8
 8 -1 9 1.1 2.5
 8 -1 9 -2.6 5.5
 8 -1 9 3.2 4
 8 -1 9 7.2 5.4
 8 -1 9 -1.9 3.2
 8 -1 9 3.3 4.2
 8 -1 9 3.8 2.5
 8 -1 9 1 5.6
 -7 1 -9 11.1 2.6
 -7 1 -9 17.4 3.6
 -7 1 -9 10.5 8.4
 -7 1 -9 13.8 3
 -7 1 -9 10.8 7
 -7 1 -9 14.6 7.4
 -7 1 -9 11.1 4.4
 -7 1 -9 5.4 4.3
 -7 1 -9 9.5 8
 -7 1 -9 8.4 7.3
 7 -1 9 13.5 3.2
 7 -1 9 13.5 5.6
 7 -1 9 7.5 5.6
 7 -1 9 11 6.3
 7 -1 9 5.1 5
 7 -1 9 11.5 6.2
 7 -1 9 25.4 5.5
 7 -1 9 13.7 5
 7 -1 9 10.5 5.5
 7 -1 9 13.1 2.7
 7 -1 9 14.1 4.4
 -6 1 -9 174.68 11.5
 -6 1 -9 159.28 12.9
 -6 1 -9 188.58 15.9
 -6 1 -9 185.18 17.7
 -6 1 -9 166.98 15.3
 -6 1 -9 170.48 12.1
 -6 1 -9 160.88 12.7
 -6 1 -9 175.38 11.2
 -6 1 -9 138.29 14.3
 -6 1 -9 182.68 17.1
 6 -1 9 141.99 13.8
 6 -1 9 185.18 12.8
 6 -1 9 195.98 14.9
 6 -1 9 162.78 13.7
 6 -1 9 172.88 12
 6 -1 9 168.38 12.8
 6 -1 9 185.28 14
 6 -1 9 161.38 13.5
 6 -1 9 166.18 14.6
 6 -1 9 172.58 9.7
 -5 1 -9 839.32 43.6
 -5 1 -9 871.01 45.2
 -5 1 -9 722.73 45.8
 -5 1 -9 781.52 45.3
 -5 1 -9 730.13 47.4
 -5 1 -9 844.32 45.6
 -5 1 -9 850.01 47.1
 -5 1 -9 808.32 46.8
 -5 1 -9 831.12 44.3
 5 -1 9 818.92 45.4
 5 -1 9 743.93 45.6
 5 -1 9 848.52 45.8
 5 -1 9 744.43 46.3
 5 -1 9 769.92 45.2
 5 -1 9 806.02 46.1
 5 -1 9 819.92 44.9
 5 -1 9 812.32 46.4
 -4 1 -9 3.8 3.9
 -4 1 -9 2.2 5.1
 -4 1 -9 -1 3.2
 -4 1 -9 0 1.9
 -4 1 -9 -0.9 3.8
 -4 1 -9 5 3.8
 -4 1 -9 7.9 3.1
 -4 1 -9 3.5 3.4
 -4 1 -9 4.1 1
 4 -1 9 0.5 3.2
 4 -1 9 4.6 3.2
 4 -1 9 3.2 4.3
 4 -1 9 2.3 3.7
 4 -1 9 1.7 3.2
 4 -1 9 -0.5 3.2
 4 -1 9 -0.8 3.6
 4 -1 9 3.1 3.3
 -3 1 -9 1017.2 57.49
 -3 1 -9 1089.79 56.29
 -3 1 -9 1146.79 58.59
 -3 1 -9 1054.59 58.39
 -3 1 -9 976.5 57.69
 -3 1 -9 1107.09 57.29
 -3 1 -9 1084.09 58.29
 3 -1 9 1003.2 57.69
 3 -1 9 1070.69 58.09
 3 -1 9 1047.2 57.99
 3 -1 9 957.8 57.19
 3 -1 9 1123.99 57.79
 3 -1 9 1058.99 59.09
 3 -1 9 1082.59 57.69
 3 -1 9 993.9 57.09
 -2 1 -9 1833.02 89.09
 -2 1 -9 1723.23 90.39
 -2 1 -9 1698.93 89.29
 -2 1 -9 1719.43 88.39
 -2 1 -9 1643.14 89.19
 -2 1 -9 1751.92 90.39
 2 -1 9 1747.23 88.99
 2 -1 9 1539.55 89.69
 2 -1 9 1660.23 90.99
 2 -1 9 1450.95 88.99
 -1 1 -9 9.7 4
 -1 1 -9 11.3 3
 -1 1 -9 11.7 4.6
 -1 1 -9 6.2 3.2
 -1 1 -9 7.1 3.8
 -1 1 -9 6.6 1.9
 1 -1 9 5.4 1.9
 1 -1 9 15.4 4.2
 1 -1 9 3.1 3.1
 1 -1 9 8.9 4.5
 1 -1 9 7.4 3.5
 1 -1 9 9.8 2.6
 1 -1 9 6.4 3.2
 0 1 -9 19.4 4.4
 0 1 -9 20.8 5.2
 0 1 -9 18.3 3.8
 0 1 -9 23.1 5.2
 0 1 -9 24.5 3
 0 1 -9 19.8 4.8
 0 1 -9 26.7 3.6
 0 1 -9 22.9 4.2
 0 -1 9 24.6 2.5
 0 -1 9 16.8 4.4
 0 -1 9 18.1 4
 0 -1 9 25.6 3.4
 0 -1 9 19.7 5.7
 0 -1 9 18 4.4
 0 -1 9 21.9 4.2
 1 1 -9 217.78 14.4
 1 1 -9 206.28 15.5
 1 1 -9 216.48 15.4
 1 1 -9 231.58 14.9
 1 1 -9 234.18 14.2
 1 1 -9 223.28 14.8
 1 1 -9 238.78 12.4
 1 1 -9 207.58 15.1
 -1 -1 9 216.48 13.6
 -1 -1 9 233.58 14.4
 -1 -1 9 233.18 14.6
 -1 -1 9 246.68 16.4
 -1 -1 9 241.88 14.4
 -1 -1 9 218.28 14.1
 -1 -1 9 232.38 15
 2 1 -9 83.49 8.4
 2 1 -9 93.09 7.6
 2 1 -9 92.19 8.9
 2 1 -9 81.19 7.3
 2 1 -9 82.59 8.4
 2 1 -9 95.39 7.9
 2 1 -9 80.99 8.4
 2 1 -9 89.39 5.3
 -2 -1 9 92.99 7.3
 -2 -1 9 104.89 8
 -2 -1 9 105.39 9.6
 -2 -1 9 87.79 7.5
 -2 -1 9 93.09 7.9
 -2 -1 9 93.19 7.2
 -2 -1 9 92.99 7.4
 3 1 -9 1098.79 66.09
 3 1 -9 1296.37 66.69
 3 1 -9 1211.38 67.39
 3 1 -9 1221.98 66.19
 3 1 -9 1182.38 65.39
 3 1 -9 1230.98 65.49
 3 1 -9 1285.07 64.29
 3 1 -9 1226.78 66.69
 -3 -1 9 1267.87 64.69
 -3 -1 9 1180.18 65.99
 -3 -1 9 1246.88 66.19
 -3 -1 9 1261.57 64.79
 -3 -1 9 1182.98 65.69
 -3 -1 9 1187.08 66.59
 -3 -1 9 1149.19 66.39
 -3 -1 9 1244.28 64.89
 -3 -1 9 1282.77 65.49
 4 1 -9 72.79 8.2
 4 1 -9 60.19 5.4
 4 1 -9 43.5 6
 4 1 -9 57.29 5.9
 4 1 -9 58.99 4.6
 4 1 -9 59.89 6.8
 4 1 -9 60.09 6.3
 4 1 -9 62.79 5.8
 4 1 -9 63.89 7
 4 1 -9 63.49 6.6
 4 1 -9 60.89 8.8
 -4 -1 9 63.89 7.5
 -4 -1 9 42 6.7
 -4 -1 9 62.69 7.4
 -4 -1 9 61.79 6
 -4 -1 9 67.59 7.5
 -4 -1 9 54.09 4.4
 -4 -1 9 54.19 5.6
 -4 -1 9 57.99 6.3
 -4 -1 9 38 6.7
 5 1 -9 131.29 9
 5 1 -9 113.79 9.5
 5 1 -9 115.79 9.6
 5 1 -9 120.49 9.7
 5 1 -9 102.69 9.7
 5 1 -9 116.99 8.2
 5 1 -9 113.89 9.5
 5 1 -9 102.39 10.1
 5 1 -9 111.29 11.5
 5 1 -9 136.69 9.6
 5 1 -9 103.59 8.7
 5 1 -9 112.09 8.4
 -5 -1 9 122.29 9.1
 -5 -1 9 92.39 10.7
 -5 -1 9 113.79 9.1
 -5 -1 9 123.19 9.9
 -5 -1 9 112.49 9.1
 -5 -1 9 127.69 8.5
 -5 -1 9 70.59 11.1
 -5 -1 9 121.79 10.8
 6 1 -9 1495.05 81.09
 6 1 -9 1491.05 79.99
 6 1 -9 1672.23 80.69
 6 1 -9 1548.15 81.09
 6 1 -9 1561.04 81.69
 6 1 -9 1520.55 82.49
 6 1 -9 1504.05 80.49
 6 1 -9 1425.86 83.59
 6 1 -9 1522.25 84.39
 6 1 -9 1529.55 81.99
 6 1 -9 1608.94 80.89
 6 1 -9 1550.34 84.49
 6 1 -9 1606.74 83.09
 6 1 -9 1577.04 80.99
 -6 -1 9 1497.85 81.19
 -6 -1 9 1429.26 80.79
 -6 -1 9 1437.46 81.59
 -6 -1 9 1496.85 82.89
 -6 -1 9 1474.25 82.89
 -6 -1 9 1503.25 79.59
 -6 -1 9 1243.28 81.99
 -6 -1 9 1430.56 82.39
 7 1 -9 742.73 43.2
 7 1 -9 732.53 41.9
 7 1 -9 757.62 41.4
 7 1 -9 716.23 45.7
 7 1 -9 809.92 41.5
 7 1 -9 624.54 46.8
 7 1 -9 832.32 43.1
 7 1 -9 772.32 42.7
 7 1 -9 760.42 44.1
 7 1 -9 802.32 41.6
 7 1 -9 766.92 45.6
 7 1 -9 765.82 41.6
 -7 -1 9 678.73 44.1
 -7 -1 9 733.83 42.6
 -7 -1 9 741.33 43.3
 -7 -1 9 700.23 39.4
 -7 -1 9 714.03 44.2
 -7 -1 9 681.33 43.7
 8 1 -9 140.39 10.6
 8 1 -9 136.79 15.3
 8 1 -9 139.09 12.3
 8 1 -9 118.09 14.1
 8 1 -9 152.78 12.5
 8 1 -9 136.29 12.6
 8 1 -9 146.99 10.3
 8 1 -9 145.39 10.3
 8 1 -9 141.59 10.2
 8 1 -9 132.09 10.7
 8 1 -9 122.19 13.9
 8 1 -9 149.99 11.9
 8 1 -9 155.48 17.3
 -8 -1 9 129.29 13.2
 -8 -1 9 116.09 14.3
 -8 -1 9 132.19 12.6
 -8 -1 9 137.79 14.2
 -8 -1 9 123.89 14.3
 9 1 -9 71.69 9.5
 9 1 -9 70.09 7.2
 9 1 -9 47.6 10.2
 9 1 -9 64.59 7.6
 9 1 -9 52.29 8.3
 9 1 -9 62.59 6.2
 9 1 -9 65.29 11.7
 9 1 -9 62.29 6.1
 9 1 -9 64.29 5.8
 -9 -1 9 60.99 10.8
 -9 -1 9 50.29 11.1
 -9 -1 9 57.59 10.4
 -9 -1 9 78.19 10.6
 -9 -1 9 51.89 10.4
 10 1 -9 19.2 7.9
 10 1 -9 28.5 3.5
 10 1 -9 45.7 10.1
 10 1 -9 25 3.3
 10 1 -9 28.8 7.5
 10 1 -9 26.6 4
 10 1 -9 30.7 5.2
 -10 -1 9 42.4 9.7
 -10 -1 9 23.3 7.8
 -10 -1 9 22.2 9.1
 -10 -1 9 15.1 9
 -10 -1 9 31.7 9.4
 11 1 -9 108.19 9.4
 11 1 -9 95.09 14.3
 11 1 -9 112.09 10.1
 11 1 -9 97.99 8
 -11 -1 9 98.99 15.9
 -11 -1 9 126.29 14.8
 -11 -1 9 126.19 15.8
 -11 -1 9 110.59 15.4
 12 1 -9 219.18 14
 12 1 -9 255.17 16.4
 12 1 -9 227.08 15.4
 -12 -1 9 187.68 22.4
 -12 -1 9 247.08 22.1
 13 1 -9 299.77 19.5
 13 1 -9 316.87 20.7
 13 1 -9 375.66 27.8
 -13 -1 9 322.67 26.4
 14 1 -9 -1.2 7.7
 14 1 -9 -2 3.6
 -14 1 -8 58.99 15.5
 -14 1 -8 57.29 15.9
 14 -1 8 40.7 4.9
 14 -1 8 41.7 5.4
 14 -1 8 57.39 7.6
 -13 1 -8 59.29 15.1
 -13 1 -8 45.5 11.5
 -13 1 -8 38 13.2
 13 -1 8 49.1 7.3
 13 -1 8 45.5 7
 13 -1 8 48.8 6.3
 -12 1 -8 52.69 14.5
 -12 1 -8 22.9 11.2
 -12 1 -8 22.1 9.1
 -12 1 -8 36.8 13
 12 -1 8 45.2 7.3
 12 -1 8 45.6 7.6
 12 -1 8 41.4 4.6
 12 -1 8 43.6 6.7
 12 -1 8 27.6 6
 12 -1 8 38.2 6.7
 -11 1 -8 38.3 10.6
 -11 1 -8 50.29 16.7
 -11 1 -8 33.7 12.4
 -11 1 -8 21.7 11.8
 11 -1 8 29.1 5.7
 11 -1 8 33.8 6.8
 11 -1 8 30.3 4.2
 11 -1 8 31.3 6.2
 11 -1 8 30.6 5.3
 -10 1 -8 131.39 17
 -10 1 -8 138.39 19.6
 -10 1 -8 151.08 19.1
 -10 1 -8 120.89 8.1
 -10 1 -8 108.09 15
 -10 1 -8 114.59 8
 10 -1 8 127.99 12.4
 10 -1 8 138.59 9
 10 -1 8 112.19 10.6
 10 -1 8 115.59 11.4
 10 -1 8 125.19 9.8
 10 -1 8 117.39 10.5
 -9 1 -8 281.17 25.1
 -9 1 -8 258.47 22
 -9 1 -8 251.47 16.5
 -9 1 -8 275.77 16.9
 -9 1 -8 290.57 24.7
 -9 1 -8 253.17 22.5
 -9 1 -8 267.97 22.6
 9 -1 8 284.87 17
 9 -1 8 263.47 18
 9 -1 8 272.97 18.4
 9 -1 8 286.07 19
 9 -1 8 289.57 18.3
 9 -1 8 251.67 20.3
 9 -1 8 270.77 19.7
 9 -1 8 282.87 16.4
 -8 1 -8 171.48 16.1
 -8 1 -8 160.78 16.6
 -8 1 -8 136.79 11.2
 -8 1 -8 135.39 18.5
 -8 1 -8 159.98 18.4
 -8 1 -8 145.49 11.1
 -8 1 -8 165.98 16.2
 8 -1 8 175.68 15.3
 8 -1 8 161.38 10.2
 8 -1 8 133.39 11.8
 8 -1 8 154.38 12.3
 8 -1 8 156.58 13.9
 8 -1 8 149.39 15
 8 -1 8 176.38 12.3
 8 -1 8 165.38 12.4
 8 -1 8 135.59 13.7
 8 -1 8 128.59 10.2
 8 -1 8 139.79 14.7
 -7 1 -8 36.2 5.9
 -7 1 -8 51.59 9.7
 -7 1 -8 36.3 8.7
 -7 1 -8 26.6 8.8
 -7 1 -8 40.8 9.1
 -7 1 -8 43.8 4.9
 -7 1 -8 37.4 5.6
 -7 1 -8 42.2 10.8
 7 -1 8 51.59 6.8
 7 -1 8 45.2 8.3
 7 -1 8 45.6 6.4
 7 -1 8 33.5 7.1
 7 -1 8 44.9 6.4
 7 -1 8 46 8.3
 7 -1 8 40.5 8.1
 7 -1 8 43.7 4.7
 7 -1 8 41.8 4.7
 7 -1 8 39.1 7.7
 -6 1 -8 2.9 5.6
 -6 1 -8 4.1 2.4
 -6 1 -8 5.5 5.2
 -6 1 -8 5.1 2.8
 -6 1 -8 5.9 2.4
 -6 1 -8 -4 5.7
 -6 1 -8 2 3.4
 -6 1 -8 -4.6 5.6
 -6 1 -8 6.6 3.2
 -6 1 -8 -0.2 5
 6 -1 8 3.6 3.3
 6 -1 8 7.7 4.4
 6 -1 8 6.4 4.6
 6 -1 8 5.2 1.9
 6 -1 8 2.4 2.1
 6 -1 8 7 3.7
 6 -1 8 2.4 4.5
 6 -1 8 -0.2 4.2
 6 -1 8 8.5 3.3
 6 -1 8 6.7 3.5
 6 -1 8 -0.1 3.9
 -5 1 -8 47 5.2
 -5 1 -8 33.1 7
 -5 1 -8 53.19 8
 -5 1 -8 44.2 5.8
 -5 1 -8 51.29 6.8
 -5 1 -8 29.9 6.7
 -5 1 -8 38.4 8.3
 -5 1 -8 46.4 6.4
 -5 1 -8 44.9 4.6
 -5 1 -8 40.3 3.6
 5 -1 8 49.99 7.3
 5 -1 8 49.1 6.1
 5 -1 8 41.7 3.2
 5 -1 8 47.5 7.3
 5 -1 8 26.3 6.1
 5 -1 8 39.2 6
 5 -1 8 43.9 5.9
 5 -1 8 46.7 5.5
 5 -1 8 57.99 7.6
 -4 1 -8 18.7 5.2
 -4 1 -8 19.5 5.1
 -4 1 -8 25.1 4.8
 -4 1 -8 10.7 5.5
 -4 1 -8 18.3 5.2
 -4 1 -8 24.1 4.1
 -4 1 -8 14.7 2.1
 -4 1 -8 23.3 4.6
 -4 1 -8 16.8 3
 -4 1 -8 25.7 4.8
 4 -1 8 14.3 4.8
 4 -1 8 17.6 4.1
 4 -1 8 12.4 3.8
 4 -1 8 19.4 4.4
 4 -1 8 18.4 4.8
 4 -1 8 18.5 5.6
 4 -1 8 19 5
 -3 1 -8 48.3 6.4
 -3 1 -8 42.5 6.3
 -3 1 -8 46.9 3.5
 -3 1 -8 48.5 6.6
 -3 1 -8 62.09 8.1
 -3 1 -8 43.7 6.4
 -3 1 -8 50.69 5.7
 -3 1 -8 47.4 4.5
 3 -1 8 39.6 5.9
 3 -1 8 44.2 6.1
 3 -1 8 31.8 5.4
 3 -1 8 44.9 5.9
 3 -1 8 48.5 6.1
 3 -1 8 26.4 4.8
 3 -1 8 33.4 6.1
 -2 1 -8 1221.68 65.79
 -2 1 -8 1213.98 65.89
 -2 1 -8 1269.07 65.79
 -2 1 -8 1222.98 64.99
 -2 1 -8 1184.48 64.59
 -2 1 -8 1240.48 63.99
 -2 1 -8 1209.38 64.79
 2 -1 8 1161.58 65.39
 2 -1 8 1229.08 64.69
 2 -1 8 1204.08 65.29
 2 -1 8 1273.77 65.49
 2 -1 8 1162.08 66.19
 2 -1 8 1114.29 64.69
 -1 1 -8 1293.37 70.29
 -1 1 -8 1235.68 71.49
 -1 1 -8 1299.47 69.39
 -1 1 -8 1395.76 70.99
 -1 1 -8 1285.07 71.79
 -1 1 -8 1426.06 71.89
 1 -1 8 1305.77 69.99
 1 -1 8 1367.26 72.39
 1 -1 8 1297.17 71.39
 1 -1 8 1317.67 69.39
 1 -1 8 1399.56 71.19
 1 -1 8 1454.45 71.49
 1 -1 8 1187.38 70.59
 0 1 -8 16.1 4.1
 0 1 -8 22 2.7
 0 1 -8 10.1 4.2
 0 1 -8 20.5 3
 0 1 -8 12.7 4.1
 0 1 -8 21.6 3.8
 0 1 -8 15.1 3.7
 0 -1 8 17 4
 0 -1 8 24.1 4.1
 0 -1 8 23.7 5.1
 0 -1 8 27.7 4.4
 0 -1 8 15.2 3.6
 0 -1 8 22.1 2.4
 0 -1 8 17 2.7
 1 1 -8 68.39 7.2
 1 1 -8 58.59 7.4
 1 1 -8 66.79 5.9
 1 1 -8 66.39 6.4
 1 1 -8 63.19 7
 1 1 -8 69.19 4.1
 1 1 -8 62.99 6.1
 1 1 -8 59.49 6.4
 -1 -1 8 67.29 5.9
 -1 -1 8 66.39 6.7
 -1 -1 8 63.19 5.4
 -1 -1 8 71.29 6.3
 -1 -1 8 59.19 6
 -1 -1 8 71.29 6
 -1 -1 8 76.99 8.5
 2 1 -8 215.68 11.8
 2 1 -8 233.48 14
 2 1 -8 205.38 14.1
 2 1 -8 211.58 13.5
 2 1 -8 205.18 14.6
 2 1 -8 225.18 14.9
 2 1 -8 219.28 13.6
 2 1 -8 180.58 14
 -2 -1 8 220.78 13.8
 -2 -1 8 227.48 13.4
 -2 -1 8 218.18 13.6
 -2 -1 8 217.28 13.2
 -2 -1 8 206.28 14.7
 -2 -1 8 230.08 13.4
 -2 -1 8 206.88 14
 -2 -1 8 214.88 13.9
 3 1 -8 251.27 14.6
 3 1 -8 228.18 15.5
 3 1 -8 203.28 15
 3 1 -8 234.68 13.5
 3 1 -8 207.88 14.1
 3 1 -8 247.18 15.5
 3 1 -8 248.48 14.8
 3 1 -8 237.68 16.5
 3 1 -8 234.28 15.1
 -3 -1 8 237.58 14.7
 -3 -1 8 274.67 15.7
 -3 -1 8 219.88 15.4
 -3 -1 8 243.38 13.9
 -3 -1 8 241.48 13.8
 -3 -1 8 253.47 14.5
 -3 -1 8 214.18 15
 -3 -1 8 225.68 13.7
 -3 -1 8 209.68 15.3
 -3 -1 8 255.97 15.4
 4 1 -8 708.93 38.5
 4 1 -8 625.74 38.1
 4 1 -8 668.13 37.4
 4 1 -8 706.43 38.6
 4 1 -8 749.82 38.2
 4 1 -8 657.23 37.3
 4 1 -8 753.02 37.8
 4 1 -8 667.53 38.3
 4 1 -8 739.53 39.3
 4 1 -8 750.42 38.5
 4 1 -8 685.03 37
 4 1 -8 707.53 40.4
 -4 -1 8 559.24 38.6
 -4 -1 8 742.83 39.1
 -4 -1 8 691.23 38.1
 -4 -1 8 694.53 38.4
 -4 -1 8 576.24 38.5
 -4 -1 8 721.43 39.1
 -4 -1 8 689.53 37.8
 -4 -1 8 661.83 36.2
 -4 -1 8 695.03 37.6
 -4 -1 8 649.74 36.2
 5 1 -8 13.2 3.6
 5 1 -8 15.4 3.1
 5 1 -8 13.3 4.1
 5 1 -8 11.1 3.1
 5 1 -8 9.6 3.4
 5 1 -8 10.7 4.2
 5 1 -8 9.7 5.3
 5 1 -8 7.4 4.2
 5 1 -8 14 4.1
 5 1 -8 16.7 3.5
 5 1 -8 6.7 3.3
 5 1 -8 13.7 3.6
 -5 -1 8 13.9 5.2
 -5 -1 8 13.3 3.2
 -5 -1 8 8.9 3.8
 -5 -1 8 7.6 4
 -5 -1 8 14 3.7
 -5 -1 8 16.6 4.1
 -5 -1 8 5.6 4.2
 -5 -1 8 10.4 4.6
 6 1 -8 231.08 14.4
 6 1 -8 192.08 11.7
 6 1 -8 197.18 12.6
 6 1 -8 188.68 12.8
 6 1 -8 177.48 13.3
 6 1 -8 183.78 13.4
 6 1 -8 177.58 15.7
 6 1 -8 175.78 12.6
 6 1 -8 182.48 14.4
 6 1 -8 195.38 12.4
 6 1 -8 174.88 14.3
 6 1 -8 196.78 14
 6 1 -8 201.48 15.9
 6 1 -8 163.08 15.3
 6 1 -8 194.38 12.4
 -6 -1 8 195.38 14.8
 -6 -1 8 195.68 15.5
 -6 -1 8 190.08 11.2
 -6 -1 8 172.78 14.7
 -6 -1 8 178.08 13.4
 -6 -1 8 175.38 11.4
 -6 -1 8 186.68 15.1
 -6 -1 8 142.19 14.3
 7 1 -8 9.5 5
 7 1 -8 7.3 4.4
 7 1 -8 6.8 6.1
 7 1 -8 13.4 2.8
 7 1 -8 12.3 3.5
 7 1 -8 15.5 4
 7 1 -8 8.4 4.6
 7 1 -8 9.9 6.3
 7 1 -8 4.3 6
 7 1 -8 18.8 5
 7 1 -8 18.6 5.9
 7 1 -8 13.9 4.9
 7 1 -8 19.4 3.9
 7 1 -8 5.4 4.2
 -7 -1 8 7.3 5.7
 -7 -1 8 6.9 5.6
 -7 -1 8 12.6 5.3
 -7 -1 8 13.8 5.9
 -7 -1 8 9.8 6.5
 8 1 -8 538.25 32
 8 1 -8 533.75 30.1
 8 1 -8 537.85 29.4
 8 1 -8 596.24 30.9
 8 1 -8 557.64 34.9
 8 1 -8 541.45 32.6
 8 1 -8 559.34 30.8
 8 1 -8 527.75 44.8
 8 1 -8 543.15 35.5
 8 1 -8 534.95 34.1
 8 1 -8 520.55 35.4
 8 1 -8 537.45 29.9
 -8 -1 8 470.95 33.3
 -8 -1 8 465.25 33.9
 -8 -1 8 500.85 33.9
 -8 -1 8 507.55 33.1
 -8 -1 8 534.15 32.6
 9 1 -8 53.99 9.8
 9 1 -8 79.29 10.4
 9 1 -8 59.79 11.4
 9 1 -8 35.1 9.4
 9 1 -8 51.99 8.3
 9 1 -8 76.09 9.6
 9 1 -8 59.09 7.2
 9 1 -8 50.49 11
 9 1 -8 54.49 5.3
 9 1 -8 74.99 10
 9 1 -8 54.69 6.3
 9 1 -8 53.79 5.3
 -9 -1 8 59.99 10.2
 -9 -1 8 80.79 10.7
 -9 -1 8 52.69 10.4
 -9 -1 8 52.29 11.4
 -9 -1 8 62.59 11.1
 10 1 -8 9 5.3
 10 1 -8 4.2 6.5
 10 1 -8 8.7 1.6
 10 1 -8 4.8 6
 10 1 -8 11.1 4.6
 10 1 -8 8.1 1.6
 10 1 -8 7 3.7
 10 1 -8 3 6.7
 -10 -1 8 12.2 6.7
 -10 -1 8 12.7 7.7
 -10 -1 8 7.6 7.6
 -10 -1 8 11 7.9
 11 1 -8 122.69 15.5
 11 1 -8 125.69 9.7
 11 1 -8 117.89 8.4
 11 1 -8 127.09 10.9
 -11 -1 8 132.89 15.5
 -11 -1 8 122.49 16.5
 -11 -1 8 104.99 16.5
 -11 -1 8 132.49 16.4
 12 1 -8 114.79 7.8
 12 1 -8 120.89 10.6
 12 1 -8 119.59 15.3
 12 1 -8 110.59 8.9
 -12 -1 8 68.79 15.1
 -12 -1 8 116.99 16.3
 13 1 -8 -4.5 3.8
 13 1 -8 12.8 8.3
 13 1 -8 2.9 3
 13 1 -8 4.5 3.3
 -13 -1 8 3 7.8
 14 1 -8 4.8 7.9
 14 1 -8 12.8 4.7
 -14 1 -7 34.6 13.6
 -14 1 -7 42.3 14.7
 14 -1 7 49.5 6.7
 14 -1 7 40.1 3.2
 -13 1 -7 37.4 13.7
 -13 1 -7 58.19 11.8
 -13 1 -7 53.99 14.2
 13 -1 7 39.4 4.7
 13 -1 7 41 7.7
 13 -1 7 46.2 7.1
 13 -1 7 33 10.1
 13 -1 7 39.6 5.8
 13 -1 7 42.1 5.3
 -12 1 -7 29.2 11.1
 -12 1 -7 31.6 11.9
 -12 1 -7 2.3 7.7
 -12 1 -7 39.8 12.7
 12 -1 7 17.9 4.9
 12 -1 7 20.3 5.2
 12 -1 7 16.8 3.6
 12 -1 7 13.9 4.6
 12 -1 7 14.5 5.2
 12 -1 7 22.4 4.7
 -11 1 -7 23.2 10.2
 -11 1 -7 13 10.7
 -11 1 -7 5.1 7.4
 -11 1 -7 6.5 9.8
 11 -1 7 11.8 4.4
 11 -1 7 13.6 4.4
 11 -1 7 8.3 4.2
 11 -1 7 15.4 3.5
 11 -1 7 13.4 5.3
 -10 1 -7 5.4 7.5
 -10 1 -7 -0.7 8.4
 -10 1 -7 -4.9 7.5
 -10 1 -7 -2.7 6.6
 10 -1 7 1.9 2.9
 10 -1 7 4.3 4.4
 10 -1 7 -2.9 3.2
 10 -1 7 2.3 3.5
 10 -1 7 5.8 5.8
 10 -1 7 -0.4 2.5
 10 -1 7 2.9 3.1
 10 -1 7 2.2 3.8
 -9 1 -7 218.28 19.7
 -9 1 -7 205.48 19
 -9 1 -7 194.28 20.7
 -9 1 -7 207.58 12.9
 -9 1 -7 199.18 12.6
 -9 1 -7 231.28 22.4
 -9 1 -7 173.38 18
 9 -1 7 159.78 16.9
 9 -1 7 202.28 15.9
 9 -1 7 229.58 13.4
 9 -1 7 222.88 17.4
 9 -1 7 220.18 14.6
 9 -1 7 213.68 14.6
 9 -1 7 230.68 15.9
 9 -1 7 202.18 14.6
 -8 1 -7 54.19 11.9
 -8 1 -7 53.09 12
 -8 1 -7 50.79 10.5
 -8 1 -7 38.1 5.2
 -8 1 -7 54.69 10.3
 -8 1 -7 56.59 9.9
 8 -1 7 50.69 7.5
 8 -1 7 47.7 6.8
 8 -1 7 41.3 7.5
 8 -1 7 32.6 6.2
 8 -1 7 44.8 6.3
 8 -1 7 46.9 5.2
 8 -1 7 45.8 5.9
 8 -1 7 39.3 13.8
 -7 1 -7 813.92 51.79
 -7 1 -7 873.51 52.59
 -7 1 -7 871.41 49
 -7 1 -7 917.21 52.69
 -7 1 -7 876.91 48.9
 -7 1 -7 879.61 48.2
 -7 1 -7 915.91 53.89
 -7 1 -7 773.82 53.59
 7 -1 7 915.71 51.49
 7 -1 7 933.11 48
 7 -1 7 878.41 50.49
 7 -1 7 943.71 49.3
 7 -1 7 932.71 49.7
 7 -1 7 873.41 48.1
 7 -1 7 932.91 49.8
 7 -1 7 937.51 52.29
 7 -1 7 875.11 52.19
 7 -1 7 893.01 51.19
 -6 1 -7 203.28 12.2
 -6 1 -7 197.38 11.4
 -6 1 -7 191.18 16.1
 -6 1 -7 187.08 13.1
 -6 1 -7 191.28 17.4
 -6 1 -7 204.78 11.6
 -6 1 -7 181.18 16.6
 -6 1 -7 193.58 12.2
 -6 1 -7 216.68 13.6
 -6 1 -7 155.38 15.1
 -6 1 -7 193.38 16
 6 -1 7 195.88 13.2
 6 -1 7 191.38 14.7
 6 -1 7 202.48 13.6
 6 -1 7 186.18 13.3
 6 -1 7 207.38 15.7
 6 -1 7 190.38 11.7
 6 -1 7 192.78 13.2
 6 -1 7 192.88 14.7
 6 -1 7 216.08 14.9
 6 -1 7 185.28 15.2
 6 -1 7 199.48 11.9
 -5 1 -7 13.7 2.8
 -5 1 -7 14.3 2.7
 -5 1 -7 12.7 3.6
 -5 1 -7 15.3 5.1
 -5 1 -7 15.1 3.1
 -5 1 -7 20.8 4.5
 -5 1 -7 8.6 5.3
 -5 1 -7 18.7 5.7
 -5 1 -7 2 5.2
 -5 1 -7 21.1 3.9
 5 -1 7 12.5 3.9
 5 -1 7 14.5 3.9
 5 -1 7 18.5 2.4
 5 -1 7 22.8 5.5
 5 -1 7 18 3.7
 5 -1 7 21.8 4.2
 5 -1 7 15.8 2.6
 5 -1 7 11.9 4.6
 5 -1 7 14.1 4.6
 5 -1 7 18.5 5.5
 -4 1 -7 2395.96 116.89
 -4 1 -7 2214.18 114.09
 -4 1 -7 1940.21 115.59
 -4 1 -7 1803.02 116.09
 -4 1 -7 2307.07 114.89
 -4 1 -7 2218.18 113.09
 -4 1 -7 2319.77 116.39
 -4 1 -7 2223.98 113.59
 -4 1 -7 2298.37 115.19
 -4 1 -7 1985.8 115.39
 4 -1 7 1832.92 115.19
 4 -1 7 2299.67 116.09
 4 -1 7 2233.08 112.49
 4 -1 7 2234.48 114.59
 4 -1 7 2196.28 114.99
 4 -1 7 2134.59 114.89
 4 -1 7 2255.77 115.79
 -3 1 -7 62.49 7.1
 -3 1 -7 48.8 4.2
 -3 1 -7 75.59 7.2
 -3 1 -7 43.5 6.3
 -3 1 -7 56.99 5
 -3 1 -7 69.49 7.5
 -3 1 -7 68.59 5.8
 -3 1 -7 63.89 6.9
 3 -1 7 62.39 6.4
 3 -1 7 58.59 7
 3 -1 7 55.89 6.2
 3 -1 7 59.19 6.5
 3 -1 7 58.39 6.9
 3 -1 7 65.19 7.2
 3 -1 7 68.69 6.9
 3 -1 7 58.19 7.5
 -2 1 -7 2300.67 118.99
 -2 1 -7 2394.36 118.29
 -2 1 -7 2283.37 119.79
 -2 1 -7 2286.67 119.79
 -2 1 -7 2147.99 118.89
 -2 1 -7 2320.87 119.99
 -2 1 -7 2187.28 119.19
 2 -1 7 2293.37 119.59
 2 -1 7 2340.97 119.69
 2 -1 7 2422.96 119.29
 2 -1 7 2359.56 119.19
 2 -1 7 2177.48 120.19
 2 -1 7 2117.59 119.39
 2 -1 7 2076.09 118.89
 -1 1 -7 2201.78 113.59
 -1 1 -7 2201.08 114.69
 -1 1 -7 2216.28 114.99
 -1 1 -7 2314.97 112.69
 -1 1 -7 2288.97 113.39
 -1 1 -7 2231.08 113.99
 -1 1 -7 2083.19 114.59
 1 -1 7 2176.68 114.39
 1 -1 7 2191.08 115.29
 1 -1 7 2219.98 114.29
 1 -1 7 1924.51 113.79
 1 -1 7 2124.89 112.59
 1 -1 7 2031.4 114.29
 1 -1 7 2146.79 113.39
 0 1 -7 2994.3 149.99
 0 1 -7 2958.6 150.98
 0 1 -7 3055.09 150.28
 0 1 -7 2698.73 151.78
 0 1 -7 2582.74 151.28
 0 1 -7 2905.81 151.68
 0 1 -7 2625.14 150.98
 0 -1 7 2963.5 149.69
 0 -1 7 3071.69 151.08
 0 -1 7 2951.5 150.28
 0 -1 7 2972.1 152.18
 0 -1 7 2905.11 151.48
 0 -1 7 2662.83 150.78
 0 -1 7 3067.69 151.38
 1 1 -7 4267.77 236.08
 1 1 -7 4661.03 236.18
 1 1 -7 4500.35 236.58
 -1 -1 7 4636.94 235.48
 -1 -1 7 4578.04 236.68
 2 1 -7 3.8 2.9
 2 1 -7 2.6 2.9
 2 1 -7 2.1 1.2
 2 1 -7 2.5 3
 2 1 -7 0.7 2.1
 2 1 -7 1.3 2.5
 2 1 -7 0 2.5
 2 1 -7 2.6 2.2
 -2 -1 7 4.2 3.3
 -2 -1 7 2.1 2.7
 -2 -1 7 -1.5 2.7
 -2 -1 7 -0.5 2.2
 -2 -1 7 0.1 2.4
 -2 -1 7 2.8 2.1
 -2 -1 7 1.8 2.1
 -2 -1 7 -0.3 1.8
 -2 -1 7 3.1 2.4
 3 1 -7 2839.32 149.39
 3 1 -7 2788.32 148.59
 3 1 -7 2649.24 148.79
 3 1 -7 2989.1 150.28
 3 1 -7 2819.92 149.99
 3 1 -7 2819.12 148.99
 3 1 -7 2946.21 151.08
 3 1 -7 2937.11 149.59
 3 1 -7 2565.24 149.49
 3 1 -7 3255.47 149.79
 3 1 -7 2865.71 148.19
 -3 -1 7 2887.21 148.39
 -3 -1 7 2826.92 149.88
 -3 -1 7 2501.45 149.88
 -3 -1 7 2933.61 148.39
 -3 -1 7 2828.62 148.29
 -3 -1 7 2797.72 148.79
 -3 -1 7 3118.99 150.18
 -3 -1 7 2715.03 149.79
 -3 -1 7 2829.72 149.88
 -3 -1 7 2908.01 149.29
 -3 -1 7 2968.5 149.19
 4 1 -7 511.05 29.7
 4 1 -7 563.84 29.7
 4 1 -7 536.65 30.4
 4 1 -7 496.95 29.2
 4 1 -7 503.95 28.6
 4 1 -7 557.24 28.9
 4 1 -7 521.25 29.6
 4 1 -7 528.25 29.9
 4 1 -7 527.75 29
 4 1 -7 563.64 31.7
 4 1 -7 500.25 28.5
 4 1 -7 498.55 28.9
 -4 -1 7 528.15 29.1
 -4 -1 7 567.44 30.4
 -4 -1 7 515.55 29
 -4 -1 7 531.05 30.3
 -4 -1 7 552.34 29.6
 -4 -1 7 510.35 29.2
 -4 -1 7 478.85 28.6
 -4 -1 7 514.65 27.1
 -4 -1 7 468.25 30
 -4 -1 7 459.05 30.1
 5 1 -7 203.58 16.6
 5 1 -7 233.28 15.6
 5 1 -7 227.98 16.5
 5 1 -7 215.28 14.5
 5 1 -7 215.38 14.9
 5 1 -7 253.57 15.3
 5 1 -7 230.98 14.3
 5 1 -7 226.68 13.8
 5 1 -7 210.08 13.1
 5 1 -7 209.78 14.1
 5 1 -7 236.08 16.9
 5 1 -7 230.88 13.8
 5 1 -7 249.78 15.1
 5 1 -7 213.28 13.9
 5 1 -7 211.48 15.4
 -5 -1 7 251.67 15.3
 -5 -1 7 235.28 15.9
 -5 -1 7 221.68 13.1
 -5 -1 7 210.68 14.2
 -5 -1 7 199.88 14
 -5 -1 7 234.98 15.7
 -5 -1 7 182.28 15.3
 -5 -1 7 199.08 15.7
 -5 -1 7 226.58 14.7
 6 1 -7 267.47 15.9
 6 1 -7 278.57 17.9
 6 1 -7 265.67 18.3
 6 1 -7 268.57 16.2
 6 1 -7 264.27 17.4
 6 1 -7 259.77 17.4
 6 1 -7 260.67 16
 6 1 -7 289.87 17.9
 6 1 -7 262.67 15.3
 6 1 -7 249.68 19.4
 6 1 -7 258.77 19.6
 6 1 -7 257.47 19.5
 6 1 -7 238.78 16.8
 6 1 -7 235.08 18.1
 6 1 -7 285.87 16.3
 -6 -1 7 283.97 18.2
 -6 -1 7 247.78 18.3
 -6 -1 7 249.28 18.5
 -6 -1 7 282.67 14.7
 -6 -1 7 275.17 19
 -6 -1 7 265.37 17.2
 -6 -1 7 244.88 14.7
 -6 -1 7 270.57 17.6
 7 1 -7 43.1 7.9
 7 1 -7 39.1 7.3
 7 1 -7 40.4 9.1
 7 1 -7 42.7 4.1
 7 1 -7 49.5 7.4
 7 1 -7 44.8 5.7
 7 1 -7 44.1 6.8
 7 1 -7 54.09 9.3
 7 1 -7 45.3 5
 7 1 -7 43.8 5.1
 7 1 -7 44.9 7.2
 7 1 -7 43.8 9.3
 7 1 -7 53.39 7.9
 7 1 -7 43.8 5.1
 7 1 -7 45 7.1
 -7 -1 7 28.3 6.4
 -7 -1 7 51.29 7.8
 -7 -1 7 32.2 8.2
 -7 -1 7 41 7.9
 -7 -1 7 57.19 8.3
 -7 -1 7 27.7 7.5
 8 1 -7 721.73 45.1
 8 1 -7 765.02 41.9
 8 1 -7 681.93 38.4
 8 1 -7 695.63 42.6
 8 1 -7 790.32 42.7
 8 1 -7 706.63 42.1
 8 1 -7 695.53 44.7
 8 1 -7 720.63 38.7
 8 1 -7 780.22 40.2
 8 1 -7 725.83 39.1
 8 1 -7 694.03 44.7
 8 1 -7 727.13 41.6
 8 1 -7 714.53 38.8
 8 1 -7 699.93 43.4
 -8 -1 7 742.93 42.7
 -8 -1 7 648.94 42.6
 -8 -1 7 699.63 43.2
 -8 -1 7 612.74 42.9
 -8 -1 7 743.93 42.2
 9 1 -7 75.59 8
 9 1 -7 70.19 5.1
 9 1 -7 71.79 10
 9 1 -7 70.89 10.7
 9 1 -7 78.99 12.4
 9 1 -7 69.79 11.6
 9 1 -7 60.99 5
 9 1 -7 58.39 6.2
 9 1 -7 69.29 9.3
 9 1 -7 66.19 5.3
 9 1 -7 65.09 9.3
 9 1 -7 63.09 11.4
 9 1 -7 60.89 10.4
 9 1 -7 69.19 9.9
 -9 -1 7 79.79 10.7
 -9 -1 7 77.89 11.3
 -9 -1 7 52.69 11.2
 -9 -1 7 73.49 11.5
 -9 -1 7 56.89 10.7
 10 1 -7 234.58 20
 10 1 -7 233.28 19.7
 10 1 -7 214.18 18.5
 10 1 -7 237.38 14.6
 10 1 -7 213.48 13.6
 10 1 -7 275.67 16.4
 10 1 -7 210.18 17.7
 -10 -1 7 217.98 21
 -10 -1 7 260.67 19.5
 -10 -1 7 216.18 19.6
 -10 -1 7 245.08 20.1
 11 1 -7 48.8 5.6
 11 1 -7 52.29 7.3
 11 1 -7 48.6 4.5
 11 1 -7 56.79 10.4
 -11 -1 7 44.6 11.8
 -11 -1 7 65.39 11.3
 -11 -1 7 42.7 10.5
 12 1 -7 8 2.1
 12 1 -7 6.9 7.1
 12 1 -7 5.5 4.5
 12 1 -7 4.9 2.8
 -12 -1 7 3.7 8.1
 13 1 -7 15.5 3.2
 13 1 -7 14.8 5.3
 13 1 -7 21.1 4.3
 14 1 -7 34.9 6.5
 14 1 -7 42.5 10.6
 -15 1 -6 -13.1 10
 -15 1 -6 -19.9 9.9
 15 -1 6 9.1 6.5
 -14 1 -6 8 10.4
 -14 1 -6 4 10.3
 14 -1 6 24.4 4.8
 14 -1 6 9.1 3.1
 -13 1 -6 -11.4 6.4
 -13 1 -6 -13.7 8
 -13 1 -6 4.7 10
 13 -1 6 -2.1 4.7
 13 -1 6 0 2.4
 13 -1 6 -1.2 3
 13 -1 6 0.7 2.2
 13 -1 6 -7.6 3.2
 -12 1 -6 4 7.9
 -12 1 -6 19 10.4
 -12 1 -6 8.5 9.1
 12 -1 6 11.6 3.6
 12 -1 6 15.4 5.3
 12 -1 6 -1.9 3.3
 12 -1 6 11.8 4.2
 12 -1 6 11.1 3.3
 12 -1 6 6.4 3.5
 -11 1 -6 81.99 13.1
 -11 1 -6 63.69 14.1
 -11 1 -6 97.79 16.9
 -11 1 -6 82.59 14.3
 11 -1 6 71.89 8.9
 11 -1 6 78.79 7.9
 11 -1 6 86.29 7.7
 11 -1 6 63.59 9.8
 11 -1 6 88.19 8.3
 11 -1 6 87.19 9
 11 -1 6 74.99 7.4
 -10 1 -6 173.98 18.9
 -10 1 -6 180.58 18.2
 -10 1 -6 211.98 21.8
 -10 1 -6 217.18 20.9
 10 -1 6 176.98 14.9
 10 -1 6 165.68 15.5
 10 -1 6 195.48 14.2
 10 -1 6 193.88 12.9
 10 -1 6 191.38 14.6
 10 -1 6 214.08 13.7
 10 -1 6 188.98 13.9
 10 -1 6 194.78 15.2
 10 -1 6 197.68 13.7
 -9 1 -6 41.4 3.5
 -9 1 -6 33.4 9.4
 -9 1 -6 38.8 3.5
 -9 1 -6 66.19 11.5
 -9 1 -6 52.19 11.4
 -9 1 -6 53.49 12.2
 -9 1 -6 31.5 9.2
 9 -1 6 43.1 6.3
 9 -1 6 55.39 9.2
 9 -1 6 45.7 7.5
 9 -1 6 46.8 5.3
 9 -1 6 43.4 6
 9 -1 6 47.1 7.2
 9 -1 6 43.5 6
 9 -1 6 47.5 9.2
 9 -1 6 48.6 7.1
 9 -1 6 43.3 5.8
 -8 1 -6 2546.15 145.99
 -8 1 -6 2484.25 139.29
 -8 1 -6 2769.42 144.49
 -8 1 -6 2711.93 145.79
 -8 1 -6 2627.34 139.29
 -8 1 -6 2750.72 144.79
 -8 1 -6 2743.23 147.19
 8 -1 6 2762.82 140.39
 8 -1 6 2587.34 142.79
 8 -1 6 2697.73 141.49
 8 -1 6 2826.52 139.69
 8 -1 6 2671.03 140.49
 8 -1 6 2417.96 143.69
 8 -1 6 2588.04 141.09
 8 -1 6 2728.43 140.29
 8 -1 6 2590.84 140.59
 8 -1 6 2803.42 141.89
 -7 1 -6 2458.75 121.59
 -7 1 -6 2023.3 118.49
 -7 1 -6 2228.88 119.99
 -7 1 -6 2012.2 118.19
 -7 1 -6 2231.48 118.79
 -7 1 -6 2274.67 114.99
 7 -1 6 2146.79 118.29
 7 -1 6 2181.38 115.69
 7 -1 6 2266.57 114.49
 7 -1 6 2292.57 119.59
 7 -1 6 2155.68 117.59
 7 -1 6 2105.19 118.49
 7 -1 6 2060.69 115.99
 7 -1 6 2141.99 114.89
 7 -1 6 2064.39 118.29
 7 -1 6 2213.28 117.89
 7 -1 6 2271.57 115.39
 -6 1 -6 100.59 7.6
 -6 1 -6 88.39 7.5
 -6 1 -6 76.99 10.4
 -6 1 -6 66.29 9.8
 -6 1 -6 89.49 6.8
 -6 1 -6 76.49 11.9
 -6 1 -6 93.89 7.4
 -6 1 -6 88.79 11.4
 -6 1 -6 91.19 11.2
 6 -1 6 93.29 8
 6 -1 6 96.19 8.2
 6 -1 6 96.59 9.8
 6 -1 6 94.89 9.3
 6 -1 6 94.39 9.4
 6 -1 6 81.69 8.7
 6 -1 6 97.49 7.6
 6 -1 6 102.59 7.9
 6 -1 6 87.59 6.6
 6 -1 6 89.49 6.7
 6 -1 6 90.89 7.4
 6 -1 6 90.79 10.8
 -5 1 -6 410.06 22.5
 -5 1 -6 403.66 22.5
 -5 1 -6 397.16 26.4
 -5 1 -6 357.56 25.1
 -5 1 -6 398.76 22.6
 -5 1 -6 401.76 25.7
 -5 1 -6 402.26 23.5
 -5 1 -6 341.57 24.8
 -5 1 -6 377.96 22.1
 -5 1 -6 436.16 27.4
 -5 1 -6 443.76 24.9
 5 -1 6 419.96 22.2
 5 -1 6 426.76 22.3
 5 -1 6 416.46 24.8
 5 -1 6 379.56 23.5
 5 -1 6 372.06 24.2
 5 -1 6 439.66 24.9
 5 -1 6 428.46 23.3
 5 -1 6 416.16 23.7
 5 -1 6 373.86 23.2
 5 -1 6 394.26 25.1
 5 -1 6 423.76 25.5
 -4 1 -6 2027.9 120.89
 -4 1 -6 2396.16 118.59
 -4 1 -6 2414.96 119.49
 -4 1 -6 2279.27 119.39
 -4 1 -6 2103.69 120.09
 -4 1 -6 2346.87 118.99
 -4 1 -6 2388.06 118.09
 -4 1 -6 2338.67 120.79
 -4 1 -6 2314.57 118.09
 -4 1 -6 1932.61 119.99
 4 -1 6 2296.77 118.89
 4 -1 6 2017.7 119.69
 4 -1 6 2244.18 119.79
 4 -1 6 2342.57 120.49
 4 -1 6 2384.76 117.89
 4 -1 6 2249.27 117.49
 4 -1 6 2248.28 119.29
 4 -1 6 2086.29 119.09
 4 -1 6 2544.25 120.69
 -3 1 -6 191.08 12.3
 -3 1 -6 190.68 11.3
 -3 1 -6 180.88 12.1
 -3 1 -6 178.68 12.3
 -3 1 -6 177.38 12.7
 -3 1 -6 175.08 13.4
 -3 1 -6 186.68 12.1
 -3 1 -6 173.48 10.2
 -3 1 -6 169.58 10.4
 3 -1 6 187.58 12.3
 3 -1 6 190.18 11.5
 3 -1 6 175.48 11.9
 3 -1 6 156.58 11.6
 3 -1 6 167.78 11.7
 3 -1 6 172.78 12.3
 3 -1 6 159.18 12.4
 3 -1 6 167.78 9.3
 -2 1 -6 1506.05 79.99
 -2 1 -6 1526.75 78.69
 -2 1 -6 1582.14 79.49
 -2 1 -6 1467.75 79.99
 -2 1 -6 1720.73 80.19
 -2 1 -6 1493.45 79.59
 -2 1 -6 1598.04 80.39
 2 -1 6 1538.85 79.79
 2 -1 6 1688.93 79.89
 2 -1 6 1376.96 79.69
 2 -1 6 1378.46 79.79
 2 -1 6 1363.26 79.29
 2 -1 6 1405.86 79.69
 2 -1 6 1398.26 80.29
 -1 1 -6 721.53 40.1
 -1 1 -6 779.92 39.3
 -1 1 -6 702.33 38.9
 -1 1 -6 759.22 38
 -1 1 -6 719.73 38.8
 -1 1 -6 745.03 39.9
 -1 1 -6 675.13 39.7
 1 -1 6 655.83 39.1
 1 -1 6 747.03 38.9
 1 -1 6 707.73 38
 1 -1 6 672.03 40.1
 1 -1 6 725.63 39.6
 1 -1 6 710.13 39.7
 1 -1 6 780.02 38.9
 1 -1 6 758.92 39.6
 0 1 -6 631.44 38.5
 0 1 -6 655.33 38.2
 0 1 -6 686.63 38.9
 0 1 -6 749.73 37.6
 0 1 -6 731.83 37.2
 0 1 -6 769.62 38.3
 0 -1 6 719.63 37.1
 0 -1 6 766.32 38.3
 0 -1 6 685.03 37.5
 0 -1 6 685.43 38.5
 0 -1 6 645.94 37.9
 0 -1 6 675.03 39
 0 -1 6 746.13 38.5
 1 1 -6 1326.47 72.89
 1 1 -6 1364.16 71.99
 1 1 -6 1266.87 72.49
 1 1 -6 1505.75 72.19
 1 1 -6 1329.07 72.09
 1 1 -6 1315.67 72.49
 -1 -1 6 1313.77 71.89
 -1 -1 6 1356.86 72.99
 -1 -1 6 1361.86 71.79
 -1 -1 6 1456.65 72.19
 -1 -1 6 1300.07 71.99
 -1 -1 6 1452.75 71.99
 -1 -1 6 1420.76 72.49
 -1 -1 6 1339.07 72.09
 2 1 -6 81.89 7.2
 2 1 -6 100.59 6.5
 2 1 -6 81.39 5.9
 2 1 -6 77.19 7
 2 1 -6 77.79 5.9
 2 1 -6 77.49 5.2
 2 1 -6 78.09 6.4
 2 1 -6 82.19 6.8
 2 1 -6 83.99 6.7
 2 1 -6 88.59 6.3
 -2 -1 6 82.29 6.6
 -2 -1 6 89.39 6.5
 -2 -1 6 76.99 6.8
 -2 -1 6 104.09 6.9
 -2 -1 6 91.59 6.1
 -2 -1 6 77.89 5
 -2 -1 6 77.29 6.9
 -2 -1 6 74.49 5.7
 -2 -1 6 73.49 6.4
 -2 -1 6 81.49 5.9
 3 1 -6 2121.39 111.69
 3 1 -6 2010.9 111.39
 3 1 -6 2131.99 112.29
 3 1 -6 2226.48 112.29
 3 1 -6 2006 111.29
 3 1 -6 2019.2 111.09
 3 1 -6 2286.77 112.19
 3 1 -6 2162.68 111.49
 3 1 -6 2228.88 112.79
 3 1 -6 2312.37 113.69
 3 1 -6 1990 111.89
 -3 -1 6 2190.18 112.19
 -3 -1 6 2135.69 111.59
 -3 -1 6 2257.07 111.69
 -3 -1 6 2065.89 112.29
 -3 -1 6 2221.38 111.79
 -3 -1 6 1963.5 112.29
 -3 -1 6 2138.59 110.79
 -3 -1 6 1968.2 112.59
 -3 -1 6 2091.79 111.29
 -3 -1 6 2244.88 112.69
 4 1 -6 1.7 2.4
 4 1 -6 1.4 2.6
 4 1 -6 2.7 2.2
 4 1 -6 3.6 2.9
 4 1 -6 3.5 2.2
 4 1 -6 1.6 1.7
 4 1 -6 0.9 3
 4 1 -6 6.1 3
 4 1 -6 5.4 2.2
 4 1 -6 4.5 2.9
 4 1 -6 6.7 2.9
 -4 -1 6 8.1 3.7
 -4 -1 6 7.7 3.3
 -4 -1 6 4 2.4
 -4 -1 6 1.2 2.7
 -4 -1 6 -0.3 3.3
 -4 -1 6 9.2 3.3
 -4 -1 6 -1 0.6
 -4 -1 6 1.3 3.2
 -4 -1 6 1.4 3.3
 5 1 -6 372.16 22
 5 1 -6 354.36 20
 5 1 -6 353.56 23.6
 5 1 -6 345.17 21.4
 5 1 -6 350.26 20.7
 5 1 -6 401.76 22.3
 5 1 -6 347.67 23.2
 5 1 -6 362.86 21.8
 5 1 -6 358.76 23.6
 5 1 -6 363.16 22.6
 5 1 -6 370.06 22.5
 5 1 -6 402.26 20.6
 5 1 -6 383.36 20.9
 5 1 -6 373.06 21
 5 1 -6 372.96 22.2
 -5 -1 6 376.76 19.9
 -5 -1 6 351.46 22.5
 -5 -1 6 362.56 21.7
 -5 -1 6 304.07 22.3
 -5 -1 6 373.96 22.2
 -5 -1 6 366.76 22.9
 -5 -1 6 328.07 20
 -5 -1 6 371.86 21.7
 -5 -1 6 332.37 22.6
 6 1 -6 175.58 13.3
 6 1 -6 181.48 11
 6 1 -6 163.18 14.1
 6 1 -6 168.28 13.6
 6 1 -6 177.38 15.2
 6 1 -6 175.88 13.2
 6 1 -6 189.38 10.7
 6 1 -6 181.78 11.5
 6 1 -6 178.48 13.2
 6 1 -6 186.38 11.3
 6 1 -6 194.88 11.9
 6 1 -6 175.98 13
 6 1 -6 168.38 14.7
 6 1 -6 174.88 12.9
 6 1 -6 168.48 14.8
 -6 -1 6 177.68 13.7
 -6 -1 6 178.98 13.9
 -6 -1 6 165.78 14.1
 -6 -1 6 191.88 14.7
 -6 -1 6 177.88 13.3
 -6 -1 6 177.38 13.1
 7 1 -6 175.38 15.6
 7 1 -6 176.68 11.2
 7 1 -6 182.88 14.2
 7 1 -6 204.38 12.5
 7 1 -6 172.58 13.4
 7 1 -6 190.88 13.9
 7 1 -6 169.58 12.8
 7 1 -6 173.98 10.5
 7 1 -6 180.28 13.9
 7 1 -6 182.58 15.8
 7 1 -6 171.48 15.6
 7 1 -6 154.28 14.5
 7 1 -6 170.88 13.7
 7 1 -6 184.98 14.4
 7 1 -6 188.58 11.2
 7 1 -6 188.78 11.1
 -7 -1 6 167.88 14.5
 -7 -1 6 189.98 15.2
 -7 -1 6 157.88 14.9
 -7 -1 6 159.48 14
 -7 -1 6 185.58 14
 -7 -1 6 196.28 14.3
 8 1 -6 103.69 8.6
 8 1 -6 93.79 13
 8 1 -6 95.59 10.3
 8 1 -6 78.39 10.7
 8 1 -6 86.09 11.4
 8 1 -6 95.09 9.8
 8 1 -6 109.09 13.9
 8 1 -6 89.29 6.2
 8 1 -6 101.19 13.5
 8 1 -6 82.29 8.7
 8 1 -6 84.89 6
 8 1 -6 85.89 10.5
 8 1 -6 81.79 9.3
 8 1 -6 86.69 6.2
 8 1 -6 86.49 12.5
 8 1 -6 84.99 6.6
 -8 -1 6 91.29 13.1
 -8 -1 6 90.49 11.2
 -8 -1 6 73.79 10.2
 -8 -1 6 85.79 11.6
 -8 -1 6 98.49 11.4
 -8 -1 6 87.99 11.6
 9 1 -6 582.84 30.8
 9 1 -6 522.15 27.4
 9 1 -6 490.85 33.9
 9 1 -6 509.95 32.8
 9 1 -6 511.95 28.8
 9 1 -6 528.45 28.2
 9 1 -6 536.45 32.3
 9 1 -6 551.14 33
 9 1 -6 512.65 33.1
 9 1 -6 531.15 36
 9 1 -6 508.95 32.3
 9 1 -6 528.35 33.6
 9 1 -6 529.05 35.2
 9 1 -6 517.65 31.6
 9 1 -6 497.35 35.4
 9 1 -6 521.15 27.4
 -9 -1 6 522.85 33.5
 -9 -1 6 547.35 33.3
 -9 -1 6 486.45 34.3
 -9 -1 6 467.55 33.4
 10 1 -6 26.1 8.6
 10 1 -6 26.8 6.6
 10 1 -6 29.8 5.8
 10 1 -6 25.3 6.9
 10 1 -6 38.8 9.3
 10 1 -6 35.5 4.5
 10 1 -6 35.5 7.6
 10 1 -6 31 3.5
 -10 -1 6 35.5 8.6
 -10 -1 6 26.4 8.5
 -10 -1 6 28.6 9.6
 -10 -1 6 34.2 9.3
 11 1 -6 49.9 4.1
 11 1 -6 45.7 7
 11 1 -6 46.4 5
 11 1 -6 39.7 9
 -11 -1 6 50.19 11
 -11 -1 6 64.69 11.2
 -11 -1 6 52.19 12.2
 12 1 -6 116.89 7.6
 12 1 -6 120.49 15.3
 12 1 -6 132.69 11.3
 12 1 -6 113.29 8.3
 -12 -1 6 128.49 16.6
 13 1 -6 114.79 7
 13 1 -6 121.69 15.5
 13 1 -6 87.89 10.3
 13 1 -6 112.99 7.5
 14 1 -6 264.37 18.4
 14 1 -6 259.87 22.9
 15 1 -6 78.49 12.9
 -15 1 -5 -0.3 12.2
 -15 1 -5 -13 8.8
 15 -1 5 -0.3 5.4
 -14 1 -5 15.7 12.5
 -14 1 -5 13.5 11.5
 14 -1 5 22.8 4.3
 -13 1 -5 70.89 15.7
 -13 1 -5 78.89 15.8
 13 -1 5 66.79 7.3
 13 -1 5 72.19 7.8
 13 -1 5 48.6 10.4
 13 -1 5 80.99 7.6
 -12 1 -5 15 9.1
 -12 1 -5 -7.4 8.3
 -12 1 -5 6.2 10.4
 -12 1 -5 11.9 8.3
 12 -1 5 4.2 3.3
 12 -1 5 13.4 3.9
 12 -1 5 4 6.5
 12 -1 5 1 4.3
 12 -1 5 6.7 3.3
 12 -1 5 5.7 3.6
 12 -1 5 9.1 2.8
 -11 1 -5 37.7 12.3
 -11 1 -5 12 9.2
 -11 1 -5 5.1 8.2
 -11 1 -5 4.9 7.4
 11 -1 5 5.1 3.7
 11 -1 5 12.4 4.3
 11 -1 5 6.6 3.2
 11 -1 5 14.5 5.4
 11 -1 5 6 3.5
 11 -1 5 9.2 3.1
 11 -1 5 7.8 3.6
 -10 1 -5 47.3 12.2
 -10 1 -5 47.7 11.7
 -10 1 -5 64.19 11.6
 -10 1 -5 48.5 10.5
 10 -1 5 45 6.2
 10 -1 5 47.9 6.7
 10 -1 5 53.79 5.9
 10 -1 5 47.6 7.7
 10 -1 5 45.8 8.9
 10 -1 5 52.99 6.4
 10 -1 5 53.19 7.5
 10 -1 5 51.09 6.1
 10 -1 5 57.69 8.9
 -9 1 -5 115.09 15.9
 -9 1 -5 129.29 16.1
 -9 1 -5 110.49 14.2
 -9 1 -5 140.09 16
 -9 1 -5 125.79 16.8
 9 -1 5 126.59 13.4
 9 -1 5 117.59 11
 9 -1 5 115.09 9.1
 9 -1 5 112.99 10.1
 9 -1 5 120.19 10.6
 9 -1 5 107.29 11.1
 9 -1 5 105.79 8.8
 9 -1 5 104.09 11.6
 9 -1 5 111.29 9.2
 9 -1 5 90.39 9.3
 -8 1 -5 104.29 13.2
 -8 1 -5 153.88 14.9
 -8 1 -5 133.29 16.2
 -8 1 -5 111.59 15.1
 -8 1 -5 100.69 6.9
 8 -1 5 94.59 8.5
 8 -1 5 95.19 12.2
 8 -1 5 106.09 10
 8 -1 5 117.19 8.7
 8 -1 5 100.69 11
 8 -1 5 94.59 9.6
 8 -1 5 95.29 10.3
 8 -1 5 114.09 8.7
 8 -1 5 106.79 10.4
 -7 1 -5 83.39 6.9
 -7 1 -5 91.09 12.2
 -7 1 -5 93.89 13.7
 -7 1 -5 84.49 11.1
 -7 1 -5 101.69 12.1
 -7 1 -5 95.49 6.9
 -7 1 -5 84.39 11.2
 7 -1 5 92.09 7.8
 7 -1 5 102.29 12
 7 -1 5 89.29 8.9
 7 -1 5 94.19 10.1
 7 -1 5 98.49 9
 7 -1 5 100.79 7.4
 7 -1 5 85.59 11.3
 7 -1 5 87.79 10.4
 7 -1 5 102.09 7.9
 7 -1 5 95.29 7.7
 7 -1 5 93.99 8.1
 7 -1 5 85.29 8.5
 7 -1 5 106.19 10.3
 -6 1 -5 9.9 3.1
 -6 1 -5 10 5.5
 -6 1 -5 5.3 6.3
 -6 1 -5 5.9 3
 -6 1 -5 7.8 3.9
 6 -1 5 6 2.3
 6 -1 5 6.3 2.7
 6 -1 5 5.7 4.1
 6 -1 5 9.2 3.1
 6 -1 5 1.8 3.7
 6 -1 5 7 3.5
 6 -1 5 5.6 2.6
 6 -1 5 6.6 2.6
 6 -1 5 9.7 5.2
 6 -1 5 10.6 3.6
 6 -1 5 6.5 3.3
 6 -1 5 9.7 4.6
 -5 1 -5 -0.5 2
 -5 1 -5 5.7 4.6
 -5 1 -5 -1.6 1.1
 -5 1 -5 1.2 4.5
 -5 1 -5 1.2 2.1
 -5 1 -5 -0.1 1.6
 -5 1 -5 0.1 1
 -5 1 -5 -3.1 3.6
 -5 1 -5 -1.4 4.4
 -5 1 -5 -3.8 4
 -5 1 -5 -1.9 1.9
 5 -1 5 -0.7 3.1
 5 -1 5 2.4 3.3
 5 -1 5 -3.9 2.7
 5 -1 5 0.4 1.8
 5 -1 5 0.5 2.3
 5 -1 5 0.4 3.4
 5 -1 5 0.9 2.2
 5 -1 5 -4.3 3.4
 5 -1 5 -2.3 2.3
 5 -1 5 0.5 2.3
 5 -1 5 2.3 1.7
 5 -1 5 -3.3 2.2
 -4 1 -5 900.11 45.1
 -4 1 -5 778.22 47.2
 -4 1 -5 941.51 48
 -4 1 -5 785.52 47
 -4 1 -5 852.31 46
 -4 1 -5 852.31 45.4
 -4 1 -5 909.71 46.1
 -4 1 -5 900.01 45.1
 -4 1 -5 811.52 45.2
 -4 1 -5 727.93 47.6
 4 -1 5 893.31 44.9
 4 -1 5 875.41 45.7
 4 -1 5 846.02 44.7
 4 -1 5 828.72 47.1
 4 -1 5 806.62 46
 4 -1 5 806.22 46.5
 4 -1 5 914.01 47.6
 4 -1 5 844.32 46
 4 -1 5 755.72 45.5
 4 -1 5 896.41 46.9
 -3 1 -5 5698.83 286.17
 -3 1 -5 5548.35 285.97
 -3 1 -5 5224.28 286.27
 -3 1 -5 5416.46 285.67
 -3 1 -5 5592.14 285.07
 3 -1 5 5431.06 285.17
 3 -1 5 5497.35 285.67
 -2 1 -5 0.8 2.2
 -2 1 -5 3 2.6
 -2 1 -5 1.6 2.2
 -2 1 -5 0.8 1.5
 -2 1 -5 1 1.1
 -2 1 -5 0.1 2
 -2 1 -5 2.2 2.1
 2 -1 5 -0.4 2
 2 -1 5 -0.5 1.7
 2 -1 5 -0.5 1.9
 2 -1 5 2.8 2.6
 2 -1 5 2 2.2
 2 -1 5 -0.6 1.9
 -1 1 -5 6.3 2.1
 -1 1 -5 14.3 2.5
 -1 1 -5 6 2.6
 -1 1 -5 8.5 2.8
 -1 1 -5 10.9 1.2
 -1 1 -5 7.5 3
 -1 1 -5 9.6 2.2
 1 -1 5 8 2.6
 1 -1 5 11.2 2.7
 1 -1 5 15.2 2.6
 1 -1 5 15.9 2.6
 1 -1 5 13.6 3
 1 -1 5 8.1 3
 1 -1 5 10.2 2.3
 1 -1 5 9.7 1.1
 0 1 -5 1739.93 87.89
 0 1 -5 1650.33 86.19
 0 1 -5 1695.03 86.99
 0 1 -5 1789.82 86.59
 0 1 -5 1497.25 87.09
 0 1 -5 1510.05 87.39
 0 1 -5 1627.64 87.49
 0 -1 5 1700.93 87.09
 0 -1 5 1718.53 87.49
 0 -1 5 1805.62 87.39
 0 -1 5 1508.45 87.69
 0 -1 5 1523.45 86.49
 0 -1 5 1795.42 86.19
 1 1 -5 1153.98 60.19
 1 1 -5 1072.79 60.49
 1 1 -5 1241.08 60.39
 1 1 -5 1116.29 60.49
 1 1 -5 1049.49 60.79
 1 1 -5 1089.69 60.09
 -1 -1 5 1253.87 60.09
 -1 -1 5 1043.9 59.89
 -1 -1 5 1164.48 60.59
 -1 -1 5 1093.79 60.89
 -1 -1 5 1156.58 60.29
 -1 -1 5 1210.08 60.29
 -1 -1 5 1183.28 60.19
 -1 -1 5 1119.39 59.99
 2 1 -5 735.03 40
 2 1 -5 692.83 39.9
 2 1 -5 728.23 39.2
 2 1 -5 728.83 39.2
 2 1 -5 826.42 39.8
 2 1 -5 750.02 39.6
 2 1 -5 781.92 39.7
 2 1 -5 682.93 39.6
 2 1 -5 805.12 40.8
 2 1 -5 705.63 38.6
 2 1 -5 684.43 38.8
 -2 -1 5 759.12 39.9
 -2 -1 5 717.13 38.9
 -2 -1 5 714.23 40
 -2 -1 5 686.43 39.9
 -2 -1 5 734.23 39.8
 -2 -1 5 752.82 39.6
 -2 -1 5 761.72 39.1
 -2 -1 5 797.52 39.3
 -2 -1 5 683.53 39.7
 -2 -1 5 736.53 38.8
 3 1 -5 4777.62 244.48
 3 1 -5 4736.93 243.88
 3 1 -5 4581.04 244.08
 3 1 -5 4667.03 244.48
 3 1 -5 4860.71 244.28
 -3 -1 5 5022.9 244.08
 -3 -1 5 4420.76 244.98
 -3 -1 5 4760.12 244.98
 -3 -1 5 4484.75 244.18
 4 1 -5 15 4.5
 4 1 -5 19.6 4
 4 1 -5 12.5 2.9
 4 1 -5 14.8 3.4
 4 1 -5 16 2.2
 4 1 -5 13.6 2.4
 4 1 -5 14.2 3.3
 4 1 -5 13.8 3.9
 4 1 -5 13.3 3.6
 4 1 -5 14.6 2.8
 4 1 -5 19.4 3
 4 1 -5 13.9 3.7
 4 1 -5 14.1 4.6
 4 1 -5 15.4 3.9
 -4 -1 5 8.8 4.1
 -4 -1 5 10.8 4.2
 -4 -1 5 7.2 3.8
 -4 -1 5 11.6 3.1
 -4 -1 5 16 3.7
 -4 -1 5 22.1 4.1
 -4 -1 5 24.1 3.8
 -4 -1 5 11.2 2.8
 -4 -1 5 11.2 4.2
 5 1 -5 2324.67 126.49
 5 1 -5 2396.56 128.29
 5 1 -5 2336.37 127.99
 5 1 -5 2522.25 126.19
 5 1 -5 2336.17 127.89
 5 1 -5 2370.96 128.49
 5 1 -5 2326.47 129.39
 5 1 -5 2498.15 129.89
 5 1 -5 2570.04 128.39
 5 1 -5 2618.74 131.69
 5 1 -5 2357.66 127.69
 5 1 -5 2414.86 125.89
 5 1 -5 2333.27 127.29
 5 1 -5 2248.48 128.49
 5 1 -5 2524.05 126.99
 5 1 -5 2546.05 127.59
 -5 -1 5 2431.96 128.59
 -5 -1 5 2507.65 128.19
 -5 -1 5 2478.75 125.59
 -5 -1 5 2487.55 127.89
 -5 -1 5 2591.14 128.09
 -5 -1 5 2373.26 128.79
 -5 -1 5 2350.36 125.69
 -5 -1 5 2464.55 128.89
 -5 -1 5 2423.76 127.99
 -5 -1 5 2181.58 128.39
 6 1 -5 595.64 31.7
 6 1 -5 562.54 31
 6 1 -5 579.54 34.2
 6 1 -5 614.44 34.2
 6 1 -5 571.84 33.7
 6 1 -5 630.34 32.7
 6 1 -5 608.94 31.4
 6 1 -5 530.35 35.3
 6 1 -5 613.04 31.9
 6 1 -5 560.64 34.8
 6 1 -5 548.85 33.9
 6 1 -5 547.85 35.3
 6 1 -5 571.24 34.3
 6 1 -5 576.04 35.8
 6 1 -5 555.34 33.6
 6 1 -5 606.44 33.3
 -6 -1 5 614.24 34.1
 -6 -1 5 610.74 34.3
 -6 -1 5 574.54 33.8
 -6 -1 5 570.84 34.4
 -6 -1 5 607.24 34.1
 -6 -1 5 579.94 34.9
 7 1 -5 29.7 7.4
 7 1 -5 27.7 3.1
 7 1 -5 11.5 6.5
 7 1 -5 27.3 6
 7 1 -5 39.7 4.9
 7 1 -5 25 3.2
 7 1 -5 24.7 5.7
 7 1 -5 19.2 6
 7 1 -5 35.6 6.4
 7 1 -5 32.9 7.5
 7 1 -5 28.1 2.6
 7 1 -5 24.9 5.8
 7 1 -5 23.7 5.8
 7 1 -5 27.2 5.7
 7 1 -5 27.2 3.1
 7 1 -5 20.7 4.9
 -7 -1 5 29.6 6.5
 -7 -1 5 26.8 7.3
 -7 -1 5 18.9 5.7
 -7 -1 5 31.7 7.2
 -7 -1 5 26 6.4
 -7 -1 5 24.1 6.5
 -7 -1 5 20.8 6.2
 8 1 -5 363.56 25.5
 8 1 -5 363.06 18.4
 8 1 -5 321.57 24.3
 8 1 -5 375.66 21
 8 1 -5 336.67 25
 8 1 -5 336.57 22.1
 8 1 -5 364.26 23.7
 8 1 -5 297.17 21.9
 8 1 -5 342.37 18.3
 8 1 -5 341.97 22.9
 8 1 -5 334.17 24.1
 8 1 -5 350.56 21.8
 8 1 -5 298.07 22.4
 8 1 -5 339.97 18.4
 8 1 -5 359.16 18.8
 8 1 -5 351.06 22.8
 8 1 -5 318.67 22.4
 -8 -1 5 272.47 23.1
 -8 -1 5 332.77 23.2
 -8 -1 5 318.57 22.8
 -8 -1 5 366.66 23.3
 -8 -1 5 344.37 23.8
 -8 -1 5 285.97 22.7
 -8 -1 5 350.16 22.9
 9 1 -5 316.07 21.5
 9 1 -5 312.97 22
 9 1 -5 313.47 17.2
 9 1 -5 320.87 22.7
 9 1 -5 303.57 26.6
 9 1 -5 299.17 17.7
 9 1 -5 296.87 21
 9 1 -5 310.17 22.1
 9 1 -5 329.97 22.1
 9 1 -5 335.67 20.2
 9 1 -5 322.77 23.1
 9 1 -5 304.57 23.4
 9 1 -5 314.27 24.1
 -9 -1 5 298.07 22.9
 -9 -1 5 325.37 22.5
 -9 -1 5 288.77 23.8
 -9 -1 5 332.97 22.8
 -9 -1 5 318.07 22.9
 10 1 -5 298.87 21.8
 10 1 -5 298.67 16.5
 10 1 -5 272.17 24.9
 10 1 -5 307.77 22.8
 10 1 -5 335.47 24.5
 10 1 -5 307.77 19.7
 10 1 -5 300.47 21.2
 10 1 -5 297.07 17.1
 10 1 -5 310.67 24.6
 10 1 -5 277.77 22.1
 -10 -1 5 291.47 24.2
 -10 -1 5 302.47 22.5
 -10 -1 5 277.77 22.6
 11 1 -5 93.49 9.9
 11 1 -5 95.19 7
 11 1 -5 91.19 12.6
 11 1 -5 95.49 6.2
 -11 -1 5 109.39 14.3
 -11 -1 5 117.79 14.9
 12 1 -5 86.99 6.1
 12 1 -5 119.39 10.7
 12 1 -5 85.39 13
 12 1 -5 99.09 6.8
 13 1 -5 303.37 20
 13 1 -5 276.17 15.7
 13 1 -5 299.77 23.6
 14 1 -5 46.4 10.5
 14 1 -5 35.1 6.9
 15 1 -5 63.29 8.2
 15 1 -5 60.59 11
 -15 1 -4 18.9 13
 15 -1 4 11.9 6.9
 -14 1 -4 -19.2 8.9
 -14 1 -4 4.6 10.2
 14 -1 4 -4.9 4
 14 -1 4 9.7 3
 -13 1 -4 34.7 12.8
 -13 1 -4 31.2 12.1
 13 -1 4 37.4 5.4
 13 -1 4 25.9 4.9
 -12 1 -4 28.6 10.2
 -12 1 -4 12.5 8.8
 -12 1 -4 30.2 11.2
 -12 1 -4 18.5 9.8
 12 -1 4 3.7 6.1
 12 -1 4 18.3 2.6
 12 -1 4 17.8 5.4
 12 -1 4 16.6 2.3
 12 -1 4 20.3 4
 12 -1 4 16.5 4.1
 12 -1 4 14.9 4.6
 -11 1 -4 170.98 18.8
 -11 1 -4 160.78 17.3
 -11 1 -4 165.48 17.8
 -11 1 -4 165.28 20.9
 11 -1 4 129.49 12.2
 11 -1 4 162.08 10.9
 11 -1 4 139.59 10.5
 11 -1 4 145.09 11.6
 11 -1 4 134.69 13.8
 11 -1 4 149.69 16.9
 11 -1 4 147.89 9.7
 11 -1 4 151.98 10.4
 -10 1 -4 17.8 8
 -10 1 -4 12.5 8.6
 -10 1 -4 5.9 8.1
 -10 1 -4 29.5 9.5
 10 -1 4 28.2 4.6
 10 -1 4 24.1 4.2
 10 -1 4 28.2 6.9
 10 -1 4 28.1 4.9
 10 -1 4 33.8 5.3
 10 -1 4 25.1 6.8
 10 -1 4 27.4 5.8
 10 -1 4 23 3.9
 10 -1 4 20.3 6.8
 10 -1 4 36.2 6.6
 -9 1 -4 1175.88 63.19
 -9 1 -4 1096.59 63.79
 -9 1 -4 1101.09 62.89
 -9 1 -4 1066.29 64.29
 -9 1 -4 1091.99 62.29
 9 -1 4 1090.89 57.29
 9 -1 4 980.5 61.69
 9 -1 4 1035.7 58.69
 9 -1 4 1103.29 60.39
 9 -1 4 1002.5 59.49
 9 -1 4 1022.6 61.69
 9 -1 4 1073.79 57.19
 9 -1 4 1067.89 57.89
 9 -1 4 1031.8 57.59
 9 -1 4 1091.99 57.99
 9 -1 4 1011.9 60.29
 -8 1 -4 4594.34 224.28
 -8 1 -4 4451.85 223.68
 -8 1 -4 3971 224.68
 -8 1 -4 4325.07 224.68
 8 -1 4 4462.55 219.08
 8 -1 4 4253.77 223.68
 8 -1 4 4134.99 223.08
 8 -1 4 3865.01 220.78
 8 -1 4 4163.78 221.38
 8 -1 4 4472.55 219.58
 8 -1 4 4433.36 219.88
 8 -1 4 4268.67 223.38
 8 -1 4 3946.21 222.08
 8 -1 4 4083.99 221.78
 8 -1 4 3890.21 222.68
 8 -1 4 4092.89 220.08
 8 -1 4 4059.79 219.18
 -7 1 -4 122.29 9.7
 -7 1 -4 100.89 6.9
 -7 1 -4 111.29 13.8
 -7 1 -4 110.79 6.9
 -7 1 -4 113.09 13.3
 -7 1 -4 105.69 11.9
 -7 1 -4 116.49 12.2
 -7 1 -4 133.39 12.4
 7 -1 4 120.69 8.3
 7 -1 4 98.29 7.8
 7 -1 4 97.49 11.1
 7 -1 4 114.59 8.8
 7 -1 4 92.99 9.1
 7 -1 4 116.09 10.6
 7 -1 4 122.89 11.8
 7 -1 4 97.99 10.8
 7 -1 4 107.79 8.9
 7 -1 4 101.89 9.8
 7 -1 4 97.49 9.9
 7 -1 4 103.09 10.9
 7 -1 4 118.69 8
 7 -1 4 112.49 10.7
 7 -1 4 104.59 8.2
 -6 1 -4 245.38 17.5
 -6 1 -4 224.48 13.6
 -6 1 -4 209.68 17.8
 -6 1 -4 227.68 17.3
 -6 1 -4 225.78 18.5
 -6 1 -4 255.27 17.5
 -6 1 -4 245.28 15.2
 6 -1 4 221.58 14.3
 6 -1 4 220.88 16.7
 6 -1 4 246.78 16.3
 6 -1 4 240.98 14
 6 -1 4 249.38 14.1
 6 -1 4 245.08 17.2
 6 -1 4 206.48 14.6
 6 -1 4 216.08 17
 6 -1 4 221.78 16.3
 6 -1 4 232.18 16.3
 6 -1 4 235.58 15.4
 6 -1 4 243.78 14.3
 6 -1 4 231.98 14.4
 6 -1 4 228.18 16.8
 -5 1 -4 217.48 12.3
 -5 1 -4 212.88 13
 -5 1 -4 186.88 11.9
 -5 1 -4 180.38 12.4
 -5 1 -4 171.08 14.5
 -5 1 -4 212.08 15.3
 -5 1 -4 225.28 16.6
 -5 1 -4 197.98 14.7
 -5 1 -4 181.48 15.2
 5 -1 4 209.48 12
 5 -1 4 209.28 12.2
 5 -1 4 204.98 13.1
 5 -1 4 219.98 12.6
 5 -1 4 189.48 14.4
 5 -1 4 204.58 14.1
 5 -1 4 196.38 12.2
 5 -1 4 204.88 14.8
 5 -1 4 194.08 12.5
 5 -1 4 186.68 13
 5 -1 4 217.88 14.1
 5 -1 4 193.48 12.9
 5 -1 4 200.48 14.6
 -4 1 -4 30.7 3.9
 -4 1 -4 41 7.1
 -4 1 -4 17.7 5
 -4 1 -4 23.4 6
 -4 1 -4 29.3 4
 -4 1 -4 33.7 6.2
 -4 1 -4 30.6 2.9
 -4 1 -4 29.7 3.2
 -4 1 -4 26 5.4
 -4 1 -4 35.9 4.1
 -4 1 -4 32.9 3.3
 4 -1 4 32.5 5.9
 4 -1 4 28.6 3.5
 4 -1 4 33.6 5.2
 4 -1 4 31.3 3.4
 4 -1 4 29.9 5.6
 4 -1 4 26.8 4
 4 -1 4 33.2 3.3
 4 -1 4 46 5.9
 4 -1 4 30.8 4.1
 4 -1 4 26.1 3.9
 4 -1 4 31.9 4.6
 4 -1 4 32 4
 -3 1 -4 85.39 6.7
 -3 1 -4 88.49 8.1
 -3 1 -4 85.19 6.2
 -3 1 -4 90.49 6.6
 -3 1 -4 103.99 8.1
 -3 1 -4 107.19 8
 -3 1 -4 92.99 6.1
 -3 1 -4 102.09 7
 -3 1 -4 103.29 5.9
 -3 1 -4 83.99 8.4
 3 -1 4 83.39 6.3
 3 -1 4 101.19 8
 3 -1 4 96.39 7.4
 3 -1 4 88.99 6.7
 3 -1 4 91.09 5.6
 3 -1 4 90.19 7.6
 3 -1 4 84.29 6.8
 3 -1 4 91.89 5.7
 3 -1 4 92.29 7.3
 3 -1 4 89.19 6.4
 -1 1 -4 827.22 41.8
 -1 1 -4 815.92 41.1
 -1 1 -4 726.93 40.9
 -1 1 -4 828.82 41.2
 -1 1 -4 752.12 41.4
 -1 1 -4 739.53 41.5
 1 -1 4 693.23 41.2
 1 -1 4 796.82 41.5
 1 -1 4 803.62 41
 1 -1 4 737.13 41
 1 -1 4 804.62 41.1
 1 -1 4 718.03 41.7
 1 -1 4 777.02 41.4
 0 1 -4 3456.75 179.58
 0 1 -4 3449.05 179.58
 0 -1 4 3447.76 179.88
 1 1 -4 192.88 12.2
 1 1 -4 207.18 11.7
 1 1 -4 218.78 12.2
 1 1 -4 207.18 10.9
 1 1 -4 203.98 11.8
 1 1 -4 193.78 11.8
 1 1 -4 200.08 12.3
 1 1 -4 197.48 12.6
 -1 -1 4 215.98 12.3
 -1 -1 4 228.28 12.1
 -1 -1 4 211.78 12
 -1 -1 4 196.58 12
 -1 -1 4 196.98 11.7
 -1 -1 4 202.18 11.8
 -1 -1 4 221.98 11.8
 -1 -1 4 206.58 12.7
 3 1 -4 1510.65 80.99
 3 1 -4 1638.14 81.59
 3 1 -4 1529.25 81.19
 3 1 -4 1646.44 81.79
 3 1 -4 1478.65 81.49
 3 1 -4 1502.45 81.39
 3 1 -4 1606.64 81.89
 3 1 -4 1592.94 80.49
 3 1 -4 1563.54 80.89
 3 1 -4 1633.64 80.79
 3 1 -4 1513.75 80.29
 3 1 -4 1637.14 82.59
 3 1 -4 1476.55 80.99
 -3 -1 4 1475.15 81.69
 -3 -1 4 1535.95 80.89
 -3 -1 4 1601.04 80.59
 -3 -1 4 1492.65 81.79
 -3 -1 4 1552.64 81.69
 -3 -1 4 1516.25 81.19
 -3 -1 4 1553.24 81.19
 -3 -1 4 1341.97 81.59
 -3 -1 4 1542.05 81.19
 -3 -1 4 1515.45 81.29
 4 1 -4 39.2 2.9
 4 1 -4 37.7 5.2
 4 1 -4 26.7 4.9
 4 1 -4 36.8 3.1
 4 1 -4 42.5 6
 4 1 -4 35 5.1
 4 1 -4 47.9 5.8
 4 1 -4 48.5 6.5
 4 1 -4 47.5 6.8
 4 1 -4 31.6 4.8
 4 1 -4 27.8 4.1
 4 1 -4 36.5 3.6
 4 1 -4 34.2 4.9
 4 1 -4 56.79 6.1
 4 1 -4 38.1 4.5
 4 1 -4 39.5 3.9
 -4 -1 4 36.2 2.9
 -4 -1 4 27.2 5
 -4 -1 4 45.1 5.2
 -4 -1 4 47.6 6.5
 -4 -1 4 45.3 5.4
 -4 -1 4 41.8 5.2
 -4 -1 4 38.6 3.2
 -4 -1 4 31.7 5.2
 -4 -1 4 51.19 5.5
 -4 -1 4 38.3 5.4
 5 1 -4 216.18 16.7
 5 1 -4 219.48 15.3
 5 1 -4 218.08 15.6
 5 1 -4 203.88 16.4
 5 1 -4 218.58 16.5
 5 1 -4 233.58 13.5
 5 1 -4 236.48 13.7
 5 1 -4 239.48 12.8
 5 1 -4 229.78 15.7
 5 1 -4 208.38 16.5
 5 1 -4 249.38 14.4
 5 1 -4 230.28 16.2
 5 1 -4 252.07 13
 5 1 -4 239.78 15.7
 5 1 -4 239.48 15
 -5 -1 4 264.27 15.7
 -5 -1 4 274.27 15.9
 -5 -1 4 204.08 15.8
 -5 -1 4 255.57 15.9
 -5 -1 4 246.18 16.1
 -5 -1 4 260.87 15.8
 -5 -1 4 249.18 16.2
 -5 -1 4 236.28 16.3
 6 1 -4 133.39 8
 6 1 -4 130.39 7.1
 6 1 -4 117.99 10.4
 6 1 -4 136.79 10.8
 6 1 -4 130.29 10.5
 6 1 -4 141.39 12.8
 6 1 -4 119.19 9.9
 6 1 -4 144.39 9.4
 6 1 -4 134.89 7.3
 6 1 -4 134.09 7.8
 6 1 -4 104.29 11.7
 6 1 -4 115.09 10.2
 6 1 -4 128.79 12
 6 1 -4 113.49 9.6
 6 1 -4 102.09 11
 -6 -1 4 113.59 11
 -6 -1 4 119.29 10.8
 -6 -1 4 120.99 10.7
 -6 -1 4 115.99 11.3
 -6 -1 4 110.99 10.3
 -6 -1 4 142.29 11.2
 -6 -1 4 137.19 11.6
 7 1 -4 188.08 16
 7 1 -4 187.58 14.3
 7 1 -4 186.48 12.7
 7 1 -4 188.88 13.7
 7 1 -4 194.38 10.6
 7 1 -4 187.08 14.5
 7 1 -4 181.98 15.3
 7 1 -4 170.08 14.2
 7 1 -4 190.28 10.3
 7 1 -4 184.28 13.5
 7 1 -4 183.68 14
 7 1 -4 181.38 14
 7 1 -4 196.08 10.8
 7 1 -4 185.58 14.1
 7 1 -4 181.48 14.5
 7 1 -4 198.38 16.3
 7 1 -4 205.98 10.5
 7 1 -4 188.88 15.6
 -7 -1 4 161.38 15
 -7 -1 4 184.38 15.1
 -7 -1 4 179.68 14.7
 -7 -1 4 182.68 14.5
 -7 -1 4 203.48 15
 -7 -1 4 190.28 14.8
 -7 -1 4 180.98 15.8
 8 1 -4 -7.2 4.3
 8 1 -4 3.7 4.5
 8 1 -4 -1.7 4.2
 8 1 -4 -1.4 3.3
 8 1 -4 1.7 3.8
 8 1 -4 -0.9 4.5
 8 1 -4 -0.6 3.5
 8 1 -4 -0.3 3.8
 8 1 -4 0.3 1
 8 1 -4 3.8 4.5
 8 1 -4 -7.4 3.6
 8 1 -4 5.1 4.2
 8 1 -4 1.8 5.8
 8 1 -4 0.4 1.3
 8 1 -4 1.8 5.7
 8 1 -4 -1.9 4.9
 -8 -1 4 -9.7 4.3
 -8 -1 4 -5.6 5.1
 -8 -1 4 5.8 5.4
 -8 -1 4 -4.9 5.2
 -8 -1 4 -7.3 4.5
 -8 -1 4 -4.8 4.7
 9 1 -4 252.87 18.4
 9 1 -4 234.18 18.1
 9 1 -4 226.58 18
 9 1 -4 240.98 20.4
 9 1 -4 266.67 19.3
 9 1 -4 234.18 17.5
 9 1 -4 236.58 19.2
 9 1 -4 251.17 18.6
 9 1 -4 245.88 13.3
 9 1 -4 218.18 18.8
 9 1 -4 252.57 20.2
 9 1 -4 247.48 13.8
 9 1 -4 254.97 21.5
 9 1 -4 264.07 16.9
 -9 -1 4 234.28 20.5
 -9 -1 4 259.97 19.5
 -9 -1 4 224.18 18.9
 -9 -1 4 257.17 19.5
 -9 -1 4 223.78 18.9
 10 1 -4 219.68 20.2
 10 1 -4 208.38 18.4
 10 1 -4 239.48 19
 10 1 -4 231.98 18.3
 10 1 -4 213.58 19.7
 10 1 -4 227.18 17.5
 10 1 -4 249.58 16.5
 10 1 -4 191.68 17
 10 1 -4 231.18 12.6
 10 1 -4 273.17 22.1
 10 1 -4 225.38 13.2
 10 1 -4 235.28 20.1
 -10 -1 4 255.87 19.8
 -10 -1 4 204.18 20
 -10 -1 4 226.48 19.3
 -10 -1 4 227.78 19.4
 11 1 -4 9.8 6.7
 11 1 -4 7.7 2.2
 11 1 -4 2.5 4.5
 -11 -1 4 10 7.9
 12 1 -4 608.64 35.8
 12 1 -4 587.64 38.5
 12 1 -4 597.64 31.8
 12 1 -4 601.44 32.2
 13 1 -4 4.7 1.3
 13 1 -4 -3 4.4
 13 1 -4 -5.1 5.9
 14 1 -4 103.09 15.5
 14 1 -4 110.89 11.7
 15 1 -4 44.2 7.7
 15 1 -4 60.89 11
 15 -1 3 31 8.3
 -14 1 -3 21.7 11.1
 -14 1 -3 16.7 12.4
 14 -1 3 2.7 4.5
 14 -1 3 20.5 3.6
 14 -1 3 22.4 8.3
 -13 1 -3 1.8 8.5
 -13 1 -3 -0.6 9.1
 13 -1 3 2.1 2.7
 13 -1 3 1.2 2.7
 13 -1 3 1.3 4
 -12 1 -3 97.79 16.4
 -12 1 -3 64.29 13.4
 12 -1 3 60.99 6.1
 12 -1 3 63.59 10.1
 12 -1 3 66.69 6.3
 12 -1 3 51.49 10.4
 12 -1 3 63.19 9.4
 -11 1 -3 90.39 13.4
 -11 1 -3 76.49 13.7
 -11 1 -3 72.09 14.7
 -11 1 -3 95.69 14.7
 11 -1 3 63.19 7.9
 11 -1 3 62.89 6.2
 11 -1 3 66.29 4.8
 11 -1 3 67.69 12.7
 11 -1 3 62.99 9.5
 11 -1 3 70.69 6.8
 11 -1 3 62.09 6.3
 -10 1 -3 26.4 8.9
 -10 1 -3 18.7 9
 -10 1 -3 21.2 9.3
 -10 1 -3 29.9 8.4
 10 -1 3 23.1 3.4
 10 -1 3 24.4 3.9
 10 -1 3 25.9 6.6
 10 -1 3 22.8 5.2
 10 -1 3 25.8 5.7
 10 -1 3 25.6 7.1
 10 -1 3 29 4.1
 10 -1 3 23.7 6.2
 10 -1 3 19.5 7.6
 10 -1 3 30.9 4.8
 -9 1 -3 497.95 33.4
 -9 1 -3 540.35 34.8
 -9 1 -3 462.05 32.6
 -9 1 -3 514.65 35.3
 -9 1 -3 543.95 33.7
 9 -1 3 455.95 32.5
 9 -1 3 511.55 29.9
 9 -1 3 489.15 27.7
 9 -1 3 528.55 28.2
 9 -1 3 503.05 28
 9 -1 3 475.75 31.1
 9 -1 3 499.45 27.5
 9 -1 3 472.85 32.2
 9 -1 3 511.05 33.5
 9 -1 3 496.65 31.4
 9 -1 3 490.55 29
 9 -1 3 449.36 30.4
 9 -1 3 512.75 32.7
 -8 1 -3 1073.69 60.39
 -8 1 -3 1132.79 59.49
 -8 1 -3 1082.59 59.49
 -8 1 -3 957.8 60.09
 8 -1 3 1048.1 55.29
 8 -1 3 952.8 57.09
 8 -1 3 1003.3 57.59
 8 -1 3 1069.59 54.99
 8 -1 3 1027.4 57.89
 8 -1 3 1011.5 58.59
 8 -1 3 932.41 58.79
 8 -1 3 1024.5 54.19
 8 -1 3 1022.2 54.19
 8 -1 3 1054.39 56.99
 8 -1 3 1008.2 54.49
 8 -1 3 969.7 57.19
 8 -1 3 912.61 57.89
 8 -1 3 997.7 58.89
 8 -1 3 1012.2 55.99
 -7 1 -3 847.02 51.39
 -7 1 -3 895.41 52.99
 -7 1 -3 931.41 51.99
 -7 1 -3 902.21 51.59
 -7 1 -3 921.01 49.8
 -7 1 -3 930.91 52.69
 7 -1 3 915.61 50.79
 7 -1 3 884.01 47.7
 7 -1 3 896.91 52.49
 7 -1 3 852.11 48.9
 7 -1 3 827.72 50.89
 7 -1 3 941.31 47.6
 7 -1 3 948.41 48.5
 7 -1 3 865.21 51.19
 7 -1 3 909.31 47.9
 7 -1 3 867.01 50.09
 7 -1 3 842.62 51.39
 7 -1 3 926.01 50.59
 7 -1 3 911.91 48.3
 7 -1 3 848.32 50.09
 7 -1 3 848.42 49.5
 7 -1 3 857.71 51.49
 -6 1 -3 1350.56 73.99
 -6 1 -3 1411.96 73.99
 -6 1 -3 1431.06 79.29
 -6 1 -3 1439.26 78.79
 -6 1 -3 1416.56 78.09
 -6 1 -3 1439.06 76.29
 -6 1 -3 1401.76 77.79
 -6 1 -3 1419.06 78.09
 6 -1 3 1348.97 76.59
 6 -1 3 1359.46 77.89
 6 -1 3 1460.15 77.89
 6 -1 3 1429.46 77.19
 6 -1 3 1422.96 75.29
 6 -1 3 1419.46 76.59
 6 -1 3 1432.26 78.79
 6 -1 3 1391.16 76.89
 6 -1 3 1474.05 74.59
 6 -1 3 1437.46 74.89
 6 -1 3 1527.75 75.29
 6 -1 3 1334.47 77.39
 6 -1 3 1397.76 77.99
 6 -1 3 1422.16 75.59
 -5 1 -3 26.9 5.7
 -5 1 -3 33.9 7
 -5 1 -3 26.1 5.7
 -5 1 -3 35.4 3.4
 -5 1 -3 39.7 5.2
 -5 1 -3 30.4 6.5
 -5 1 -3 46.7 7.3
 5 -1 3 40.6 6.3
 5 -1 3 39.4 5.7
 5 -1 3 54.09 7.4
 5 -1 3 31.9 3.9
 5 -1 3 46.8 6.3
 5 -1 3 28.4 4
 5 -1 3 38.2 4
 5 -1 3 32.4 3.5
 5 -1 3 42.8 4
 5 -1 3 23 5.6
 5 -1 3 31.6 4.2
 5 -1 3 45.9 6.9
 5 -1 3 31.6 5
 5 -1 3 34 6.6
 5 -1 3 32.3 4.9
 -4 1 -3 2398.76 119.99
 -4 1 -3 2338.77 119.79
 -4 1 -3 2349.06 120.59
 -4 1 -3 2164.18 121.79
 -4 1 -3 2234.88 122.79
 -4 1 -3 2179.18 122.19
 -4 1 -3 2351.36 122.09
 4 -1 3 2171.78 120.49
 4 -1 3 2324.47 119.99
 4 -1 3 2117.79 120.39
 4 -1 3 2184.28 121.69
 4 -1 3 2287.67 119.99
 4 -1 3 2436.96 121.99
 4 -1 3 2220.28 119.99
 4 -1 3 2330.47 119.69
 4 -1 3 2433.46 122.09
 4 -1 3 2358.66 121.39
 4 -1 3 2364.66 122.49
 4 -1 3 2322.07 119.69
 4 -1 3 2300.77 120.39
 4 -1 3 2380.46 121.29
 -3 1 -3 5311.97 268.67
 -3 1 -3 5050.39 271.07
 -3 1 -3 5310.57 270.57
 3 -1 3 5086.89 269.17
 -2 1 -3 4.6 2.2
 -2 1 -3 0.1 1.4
 -2 1 -3 3.2 2.8
 -2 1 -3 3.4 2.6
 -2 1 -3 4.2 2.8
 -2 1 -3 1.3 1
 -2 1 -3 0.7 1.3
 -2 1 -3 1.8 2.1
 -2 1 -3 2.4 2
 -2 1 -3 1.2 1.7
 2 -1 3 1.8 0.8
 2 -1 3 -0.2 1.6
 2 -1 3 -0.9 2.1
 2 -1 3 -1.8 2.1
 2 -1 3 0.9 1.4
 2 -1 3 1.4 2.4
 2 -1 3 -0.6 1.9
 2 -1 3 1.5 0.9
 -1 1 -3 54.49 4.8
 -1 1 -3 48.9 4.8
 -1 1 -3 58.39 4.2
 -1 1 -3 60.29 5.1
 -1 1 -3 56.09 4.6
 -1 1 -3 64.69 4.6
 1 -1 3 59.99 4.7
 1 -1 3 59.69 5
 1 -1 3 61.99 4.5
 1 -1 3 57.99 4.3
 1 -1 3 53.29 5.1
 1 -1 3 59.39 4.7
 0 1 -3 375.06 22.3
 0 1 -3 451.35 22
 0 1 -3 406.46 21.7
 0 1 -3 376.76 22.5
 0 1 -3 435.66 22.3
 0 1 -3 396.46 22.6
 0 1 -3 394.96 22.7
 0 -1 3 424.56 22.5
 0 -1 3 417.76 22.3
 0 -1 3 451.65 21.8
 0 -1 3 384.06 22.7
 0 -1 3 426.26 22
 0 -1 3 412.26 22.2
 0 -1 3 432.66 22.6
 2 1 -3 2546.45 136.99
 2 1 -3 2751.72 137.39
 2 1 -3 2702.93 137.09
 2 1 -3 2546.35 137.09
 2 1 -3 2670.73 137.29
 2 1 -3 2821.52 137.79
 2 1 -3 2783.32 138.19
 -2 -1 3 2597.64 137.09
 -2 -1 3 2535.85 137.59
 -2 -1 3 2575.14 137.09
 -2 -1 3 2576.94 137.09
 -2 -1 3 2552.74 137.69
 3 1 -3 4642.74 235.18
 3 1 -3 4496.75 235.68
 3 1 -3 4670.83 235.88
 3 1 -3 4461.65 236.08
 3 1 -3 4750.62 236.58
 -3 -1 3 4201.78 236.08
 -3 -1 3 4537.75 236.28
 4 1 -3 657.53 34.2
 4 1 -3 708.53 35
 4 1 -3 590.04 35
 4 1 -3 579.74 34.3
 4 1 -3 638.24 35.5
 4 1 -3 634.84 34.8
 4 1 -3 582.84 34.3
 4 1 -3 603.14 32.3
 4 1 -3 619.84 34.7
 4 1 -3 617.84 32.9
 4 1 -3 612.24 33.5
 4 1 -3 587.44 35.3
 4 1 -3 598.54 34.5
 4 1 -3 608.14 34.1
 4 1 -3 628.04 35.5
 4 1 -3 629.74 32.7
 4 1 -3 646.94 33.2
 -4 -1 3 652.43 34.7
 -4 -1 3 570.94 34.7
 -4 -1 3 577.04 34.9
 -4 -1 3 617.94 34.5
 -4 -1 3 607.24 34.8
 -4 -1 3 638.74 34.6
 -4 -1 3 633.84 34.5
 -4 -1 3 608.84 34.7
 -4 -1 3 686.73 35
 5 1 -3 923.51 46.9
 5 1 -3 926.61 49.8
 5 1 -3 897.51 50.19
 5 1 -3 929.71 47
 5 1 -3 845.72 50.09
 5 1 -3 895.81 49.3
 5 1 -3 811.32 49.1
 5 1 -3 853.71 49.3
 5 1 -3 893.11 49
 5 1 -3 841.62 48.6
 5 1 -3 904.11 48
 5 1 -3 834.92 49
 5 1 -3 935.01 50.69
 5 1 -3 807.32 49.99
 5 1 -3 880.31 49.9
 -5 -1 3 931.71 49.4
 -5 -1 3 976.4 49.6
 -5 -1 3 895.01 49.6
 -5 -1 3 941.51 49.6
 -5 -1 3 861.21 49.3
 -5 -1 3 888.91 49.1
 -5 -1 3 893.21 49.2
 -5 -1 3 918.11 49.9
 6 1 -3 1204.78 66.49
 6 1 -3 1188.08 65.39
 6 1 -3 1205.38 65.89
 6 1 -3 1239.08 62.29
 6 1 -3 1111.99 64.89
 6 1 -3 1234.28 64.99
 6 1 -3 1164.98 65.39
 6 1 -3 1124.29 66.29
 6 1 -3 1208.78 64.09
 6 1 -3 1189.28 64.79
 6 1 -3 1217.48 65.49
 6 1 -3 1246.08 62.49
 6 1 -3 1164.58 66.89
 6 1 -3 1133.99 66.59
 6 1 -3 1119.59 65.19
 6 1 -3 1165.28 65.29
 -6 -1 3 1211.78 66.29
 -6 -1 3 1236.68 65.69
 -6 -1 3 1203.38 65.79
 -6 -1 3 1204.48 65.69
 -6 -1 3 1221.28 65.99
 -6 -1 3 1215.98 65.59
 -6 -1 3 1244.98 65.59
 -6 -1 3 1180.28 65.59
 7 1 -3 99.49 9.6
 7 1 -3 104.09 12.5
 7 1 -3 92.29 8.8
 7 1 -3 92.99 9.8
 7 1 -3 112.79 11.1
 7 1 -3 90.99 9
 7 1 -3 89.99 10.2
 7 1 -3 91.59 9.6
 7 1 -3 108.79 11.9
 7 1 -3 91.89 8.3
 7 1 -3 90.29 10.6
 7 1 -3 104.59 5.9
 7 1 -3 106.79 5.8
 7 1 -3 100.09 9.5
 7 1 -3 119.49 10.1
 7 1 -3 92.19 9.4
 -7 -1 3 114.09 11
 -7 -1 3 91.69 10.5
 -7 -1 3 107.99 10.9
 -7 -1 3 89.99 10.2
 -7 -1 3 90.99 10.8
 -7 -1 3 108.99 10.5
 8 1 -3 155.08 14.4
 8 1 -3 141.29 12.9
 8 1 -3 161.08 15
 8 1 -3 165.28 13.9
 8 1 -3 167.68 8.9
 8 1 -3 180.18 14.6
 8 1 -3 156.08 13
 8 1 -3 151.48 13.2
 8 1 -3 161.58 13.1
 8 1 -3 196.08 16.9
 8 1 -3 160.18 12.9
 8 1 -3 145.59 13.8
 8 1 -3 165.88 8.7
 8 1 -3 146.49 15.2
 8 1 -3 168.48 12.3
 -8 -1 3 185.48 14.7
 -8 -1 3 171.48 14.5
 -8 -1 3 151.88 14.8
 -8 -1 3 156.48 14
 -8 -1 3 131.89 13.8
 -8 -1 3 165.38 14.7
 9 1 -3 13.9 5
 9 1 -3 20.6 7.3
 9 1 -3 11.1 5.3
 9 1 -3 5.9 6.5
 9 1 -3 1.6 4.8
 9 1 -3 4.6 5.1
 9 1 -3 11.2 5.9
 9 1 -3 9.3 6.3
 9 1 -3 6.5 5.5
 9 1 -3 8.1 1.3
 9 1 -3 4.8 5.1
 9 1 -3 2 5.3
 9 1 -3 9.4 5.5
 -9 -1 3 11.5 6.6
 -9 -1 3 13.1 6.9
 -9 -1 3 8 7.2
 -9 -1 3 10.6 6.2
 -9 -1 3 5.1 6.8
 -9 -1 3 13.5 6.3
 10 1 -3 8 5
 10 1 -3 10.3 6
 10 1 -3 3.2 1.3
 10 1 -3 9.6 6.4
 10 1 -3 0.9 6
 10 1 -3 -0.6 5
 10 1 -3 7 5.2
 10 1 -3 5.9 5.2
 10 1 -3 -4.3 4.6
 10 1 -3 10.3 6
 10 1 -3 3.6 1.8
 10 1 -3 7.1 7.8
 10 1 -3 -6.2 5.2
 -10 -1 3 4.4 6.4
 -10 -1 3 20.3 7.7
 -10 -1 3 -1.4 5.9
 -10 -1 3 1.9 6
 11 1 -3 296.67 16.3
 11 1 -3 297.27 20.4
 11 1 -3 329.57 22.8
 11 1 -3 296.17 16.7
 12 1 -3 72.69 9.6
 12 1 -3 69.99 10.8
 12 1 -3 70.99 4.7
 12 1 -3 70.99 5.2
 13 1 -3 53.09 10.2
 13 1 -3 55.79 8.5
 14 1 -3 42.1 7.7
 14 1 -3 41 9.3
 15 1 -3 -6.8 6.4
 15 1 -3 -0.8 5.4
 15 -1 2 1.1 6.3
 14 -1 2 12.3 3
 14 -1 2 5.2 6.9
 14 -1 2 5.2 5.2
 -13 1 -2 -4.3 8.4
 -13 1 -2 3.5 9.9
 13 -1 2 4 2.6
 13 -1 2 2.6 2.3
 13 -1 2 0 4.7
 13 -1 2 -1.3 6.2
 -12 1 -2 16 8.9
 -12 1 -2 1 9.3
 12 -1 2 6.3 4.7
 12 -1 2 12.7 2.9
 12 -1 2 14.4 2.9
 -11 1 -2 131.69 16.5
 -11 1 -2 115.99 16.3
 -11 1 -2 138.89 18.1
 -11 1 -2 131.89 15.8
 11 -1 2 106.39 8
 11 -1 2 114.39 16.2
 11 -1 2 102.19 8
 11 -1 2 127.29 14.3
 11 -1 2 110.69 10.9
 11 -1 2 129.39 16.2
 -10 1 -2 96.59 13.6
 -10 1 -2 87.89 13.4
 -10 1 -2 114.49 16
 -10 1 -2 87.99 13.8
 10 -1 2 74.19 12.4
 10 -1 2 99.59 10.3
 10 -1 2 85.39 9.4
 10 -1 2 88.99 7
 10 -1 2 94.09 7
 10 -1 2 103.89 11.5
 10 -1 2 80.39 11.3
 10 -1 2 91.29 6.2
 10 -1 2 92.69 9.5
 10 -1 2 96.79 5.9
 -9 1 -2 111.59 14.3
 -9 1 -2 127.69 14.9
 -9 1 -2 103.89 15.5
 -9 1 -2 150.18 15.9
 -9 1 -2 151.78 14.8
 9 -1 2 122.09 7.9
 9 -1 2 132.89 15
 9 -1 2 110.39 14.6
 9 -1 2 116.39 12.2
 9 -1 2 119.99 10.8
 9 -1 2 119.09 8.4
 9 -1 2 126.09 11.4
 9 -1 2 117.79 13.2
 9 -1 2 126.89 12.1
 9 -1 2 131.39 10.8
 9 -1 2 138.29 13.2
 9 -1 2 114.89 14.4
 9 -1 2 126.09 8.3
 9 -1 2 107.69 8.4
 9 -1 2 144.89 13.1
 -8 1 -2 20.6 8.6
 -8 1 -2 25.1 9
 -8 1 -2 22.8 7.4
 -8 1 -2 12.2 7.5
 -8 1 -2 26 8
 8 -1 2 17 6
 8 -1 2 9.8 6.9
 8 -1 2 11.2 6.5
 8 -1 2 12.5 6.5
 8 -1 2 12.7 4.2
 8 -1 2 13.2 2.7
 8 -1 2 8.6 2.9
 8 -1 2 18.5 6
 8 -1 2 16.6 4.8
 8 -1 2 14.7 6.1
 8 -1 2 11.1 5.3
 8 -1 2 16.4 5.4
 8 -1 2 20.7 5.7
 8 -1 2 9.9 2.6
 8 -1 2 6.8 2.4
 8 -1 2 18.4 6.3
 -7 1 -2 629.44 35.6
 -7 1 -2 622.14 37
 -7 1 -2 631.44 37.3
 -7 1 -2 621.14 37.3
 -7 1 -2 629.34 37.9
 7 -1 2 557.14 36.1
 7 -1 2 624.74 36.2
 7 -1 2 590.14 35.7
 7 -1 2 572.34 36.4
 7 -1 2 659.33 38.2
 7 -1 2 601.94 32.9
 7 -1 2 645.14 34.3
 7 -1 2 537.35 36.6
 7 -1 2 651.43 33.4
 7 -1 2 618.64 32.8
 7 -1 2 542.65 34.9
 7 -1 2 643.14 32.7
 7 -1 2 604.14 35.8
 7 -1 2 632.34 37.2
 7 -1 2 545.05 35.2
 -6 1 -2 -5.6 4.1
 -6 1 -2 -7.8 4
 -6 1 -2 0.8 3.1
 -6 1 -2 7.4 5.2
 -6 1 -2 2.4 4.7
 -6 1 -2 -1.8 4.1
 6 -1 2 2.9 2.3
 6 -1 2 -2.3 1.5
 6 -1 2 2.8 4.8
 6 -1 2 0.6 3
 6 -1 2 -0.4 3.7
 6 -1 2 3.6 3.5
 6 -1 2 0.9 1.4
 6 -1 2 1.2 3.7
 6 -1 2 0.3 2.7
 6 -1 2 -2.8 3.8
 6 -1 2 -2.6 1.7
 6 -1 2 -3.5 3.1
 6 -1 2 1.3 4.6
 6 -1 2 -0.5 2.5
 6 -1 2 0.7 3.4
 -5 1 -2 320.07 19.6
 -5 1 -2 347.67 20.8
 -5 1 -2 283.17 18.9
 -5 1 -2 293.77 15.4
 -5 1 -2 267.17 18.8
 -5 1 -2 295.87 19.7
 -5 1 -2 291.07 15.4
 -5 1 -2 295.87 17.8
 5 -1 2 248.08 18
 5 -1 2 270.27 17.7
 5 -1 2 285.37 16.4
 5 -1 2 287.27 15.7
 5 -1 2 283.27 16.6
 5 -1 2 267.57 17.8
 5 -1 2 265.37 18.9
 5 -1 2 258.37 16.8
 5 -1 2 274.67 17.4
 5 -1 2 293.47 19.9
 5 -1 2 304.27 16.5
 5 -1 2 275.07 15.9
 -4 1 -2 138.69 11.4
 -4 1 -2 143.39 10.9
 -4 1 -2 149.29 9.8
 -4 1 -2 152.78 11.5
 -4 1 -2 134.99 11.9
 -4 1 -2 138.59 10.7
 -4 1 -2 142.99 9.2
 -4 1 -2 147.99 8.3
 4 -1 2 133.59 8.4
 4 -1 2 143.59 10.3
 4 -1 2 127.19 10.3
 4 -1 2 130.39 10.8
 4 -1 2 138.49 9
 4 -1 2 141.89 8.7
 4 -1 2 133.29 8.1
 4 -1 2 146.99 10.1
 4 -1 2 151.58 10.8
 4 -1 2 152.68 10.9
 4 -1 2 134.09 9.8
 4 -1 2 135.19 11.2
 4 -1 2 133.49 9.5
 4 -1 2 132.69 8.4
 4 -1 2 141.09 8.8
 -2 1 -2 516.15 24.7
 -2 1 -2 444.16 26.2
 -2 1 -2 473.15 26.7
 -2 1 -2 455.25 24.7
 -2 1 -2 476.85 26.3
 -2 1 -2 434.66 25.1
 -2 1 -2 465.85 25.9
 -2 1 -2 491.55 25.2
 -2 1 -2 432.56 25.7
 -2 1 -2 437.36 24.8
 -2 1 -2 510.05 24.6
 2 -1 2 430.46 24.9
 2 -1 2 499.45 26.4
 2 -1 2 452.15 24.7
 2 -1 2 489.35 25.6
 2 -1 2 465.35 24.7
 2 -1 2 471.75 25.9
 2 -1 2 434.96 25
 2 -1 2 464.85 26
 2 -1 2 456.95 25.1
 2 -1 2 462.65 24.5
 2 -1 2 503.25 25.9
 2 -1 2 453.45 25
 2 -1 2 455.65 25.3
 0 -1 2 0 0.2
 1 1 -2 1482.95 80.19
 -1 -1 2 1591.54 80.19
 2 1 -2 2209.78 111.19
 2 1 -2 2163.48 110.79
 2 1 -2 2128.09 110.89
 2 1 -2 2423.16 111.79
 2 1 -2 2218.68 111.39
 2 1 -2 2185.78 111.49
 2 1 -2 2109.49 111.29
 2 1 -2 2198.28 111.89
 -2 -1 2 2058.29 111.49
 -2 -1 2 2106.29 111.29
 -2 -1 2 2075.79 111.19
 -2 -1 2 2116.59 111.29
 -2 -1 2 2111.19 111.39
 -2 -1 2 1988.9 111.19
 -2 -1 2 1935.81 111.39
 3 1 -2 1867.61 98.89
 3 1 -2 1923.81 98.59
 3 1 -2 1972.1 99.89
 3 1 -2 1944.31 100.29
 3 1 -2 1879.41 99.69
 3 1 -2 1962.1 99.89
 3 1 -2 1961.1 99.49
 3 1 -2 1869.41 98.49
 3 1 -2 1950.6 100.29
 3 1 -2 2022.5 99.49
 3 1 -2 1872.01 99.99
 3 1 -2 1997.1 99.99
 3 1 -2 1902.91 100.29
 3 1 -2 2075.39 99.99
 3 1 -2 1884.71 99.69
 -3 -1 2 1804.82 99.49
 -3 -1 2 1854.31 99.79
 -3 -1 2 1857.71 99.89
 -3 -1 2 1850.11 99.69
 -3 -1 2 1800.22 99.49
 -3 -1 2 1711.63 99.59
 -3 -1 2 2011.6 98.19
 -3 -1 2 2014.1 98.19
 -3 -1 2 1787.42 99.79
 -3 -1 2 1845.12 99.69
 -3 -1 2 1686.63 99.79
 4 1 -2 488.65 25
 4 1 -2 473.05 25.9
 4 1 -2 451.35 27
 4 1 -2 463.45 26.8
 4 1 -2 486.35 24.9
 4 1 -2 443.16 27.6
 4 1 -2 514.75 27.1
 4 1 -2 480.55 26.5
 4 1 -2 461.35 26.9
 4 1 -2 475.65 27.5
 4 1 -2 476.85 27.5
 4 1 -2 459.25 26.7
 4 1 -2 449.46 26.6
 4 1 -2 452.05 27.5
 4 1 -2 453.85 26.4
 -4 -1 2 434.56 27.1
 -4 -1 2 470.05 26.8
 -4 -1 2 462.45 27
 -4 -1 2 493.75 27.1
 -4 -1 2 457.55 26.9
 -4 -1 2 487.25 27.3
 -4 -1 2 484.15 27.1
 -4 -1 2 483.55 26.9
 5 1 -2 121.19 11
 5 1 -2 128.19 7.2
 5 1 -2 126.19 10.7
 5 1 -2 128.49 7
 5 1 -2 124.89 10.6
 5 1 -2 122.29 9.6
 5 1 -2 125.09 9.9
 5 1 -2 125.19 8.7
 5 1 -2 114.49 10
 5 1 -2 116.79 9.7
 5 1 -2 124.99 11.2
 5 1 -2 109.49 9.2
 5 1 -2 114.89 9.4
 5 1 -2 96.19 9.6
 5 1 -2 120.59 10.6
 5 1 -2 115.99 9.3
 -5 -1 2 112.29 10.3
 -5 -1 2 129.59 10.2
 -5 -1 2 135.29 10.5
 -5 -1 2 122.79 10
 -5 -1 2 130.79 10.2
 -5 -1 2 110.99 10.3
 -5 -1 2 136.59 11
 -5 -1 2 124.09 10.3
 -5 -1 2 130.99 10.1
 6 1 -2 167.98 13
 6 1 -2 147.69 12
 6 1 -2 152.18 11.4
 6 1 -2 140.89 12.7
 6 1 -2 160.68 8.7
 6 1 -2 141.19 11.5
 6 1 -2 147.49 11.4
 6 1 -2 161.48 8.6
 6 1 -2 158.38 11.8
 6 1 -2 144.39 12.1
 6 1 -2 145.89 11.8
 6 1 -2 160.08 11.8
 6 1 -2 151.68 10.8
 6 1 -2 159.68 13.7
 6 1 -2 145.59 12.2
 -6 -1 2 154.68 12.9
 -6 -1 2 158.38 12.3
 -6 -1 2 151.88 12.7
 -6 -1 2 155.28 12.6
 -6 -1 2 163.18 13.1
 -6 -1 2 159.88 12.2
 -6 -1 2 152.88 12.4
 -6 -1 2 145.19 12.4
 -6 -1 2 140.69 12.1
 7 1 -2 56.99 7.9
 7 1 -2 59.89 9
 7 1 -2 68.79 8.9
 7 1 -2 52.59 7.4
 7 1 -2 59.19 8
 7 1 -2 64.39 9.8
 7 1 -2 69.59 10.1
 7 1 -2 60.99 3.7
 7 1 -2 56.19 7.8
 7 1 -2 71.09 9.1
 7 1 -2 58.09 8.9
 7 1 -2 61.19 3.8
 7 1 -2 76.59 8.5
 7 1 -2 69.69 7.5
 7 1 -2 59.49 6.8
 7 1 -2 53.19 8.3
 -7 -1 2 66.29 10.1
 -7 -1 2 83.29 10
 -7 -1 2 59.29 9.1
 -7 -1 2 79.09 9.8
 -7 -1 2 69.39 9.4
 -7 -1 2 74.49 10
 -7 -1 2 78.29 9.5
 8 1 -2 306.37 19
 8 1 -2 291.27 19.6
 8 1 -2 255.37 19.6
 8 1 -2 322.37 20.1
 8 1 -2 290.07 20.4
 8 1 -2 303.97 15.4
 8 1 -2 300.17 19.8
 8 1 -2 277.87 21.5
 8 1 -2 294.57 21.2
 8 1 -2 280.27 19.7
 8 1 -2 286.77 20.8
 8 1 -2 293.67 20.6
 8 1 -2 319.67 23.2
 8 1 -2 287.77 19.8
 8 1 -2 273.37 21.9
 -8 -1 2 298.67 21.2
 -8 -1 2 256.97 21.2
 -8 -1 2 299.27 21.2
 -8 -1 2 296.87 20.8
 -8 -1 2 301.37 21
 -8 -1 2 277.87 21.1
 9 1 -2 0 5.7
 9 1 -2 1.8 4.6
 9 1 -2 7.6 5.3
 9 1 -2 5.8 5.1
 9 1 -2 4.1 4.5
 9 1 -2 6 5.2
 9 1 -2 1.6 4.7
 9 1 -2 3 6.7
 9 1 -2 -3.9 3.9
 9 1 -2 7.1 6.8
 9 1 -2 5.2 1.2
 9 1 -2 7.3 5.3
 9 1 -2 7.6 4.8
 9 1 -2 8.3 5.5
 9 1 -2 -0.7 4.7
 -9 -1 2 -0.6 5.9
 -9 -1 2 8.3 6
 -9 -1 2 3.8 6.2
 -9 -1 2 0.9 5.9
 -9 -1 2 3.9 6.2
 10 1 -2 74.09 11.3
 10 1 -2 80.59 10.7
 10 1 -2 57.69 11.2
 10 1 -2 89.99 13
 10 1 -2 84.29 11.6
 10 1 -2 74.99 10.4
 10 1 -2 80.39 5
 10 1 -2 84.09 14.2
 10 1 -2 84.99 10
 10 1 -2 79.89 5.4
 10 1 -2 81.69 9.8
 -10 -1 2 93.79 13.3
 -10 -1 2 77.49 12.5
 -10 -1 2 73.69 12.2
 -10 -1 2 78.29 12.5
 -10 -1 2 88.89 12.3
 11 1 -2 30.5 7.7
 11 1 -2 30.2 6.8
 11 1 -2 40.4 11.2
 11 1 -2 26.1 2.7
 11 1 -2 30.8 3.4
 -11 -1 2 33.2 9.6
 -11 -1 2 28.8 9.4
 12 1 -2 96.89 6.6
 12 1 -2 106.29 12.7
 12 1 -2 103.09 11.6
 12 1 -2 97.29 6.2
 13 1 -2 51.39 8.9
 13 1 -2 61.09 10.3
 13 1 -2 60.69 4.5
 13 1 -2 55.09 4.1
 14 1 -2 1.1 6.6
 14 1 -2 -3.2 5.2
 15 1 -2 10.3 5.8
 15 1 -2 10.4 8.4
 15 -1 1 53.59 9.8
 15 -1 1 33.5 7.2
 14 -1 1 1.7 1.9
 14 -1 1 -3.7 4.9
 14 -1 1 -0.2 5.7
 -13 1 -1 11.3 10.1
 13 -1 1 1.9 2.2
 13 -1 1 5 5.1
 13 -1 1 3.7 2.1
 13 -1 1 -0.5 5.9
 -12 1 -1 11.4 9.2
 12 -1 1 2 4.9
 12 -1 1 12.5 2.6
 12 -1 1 13.1 6.3
 12 -1 1 10.5 2.3
 -11 1 -1 128.69 16.9
 -11 1 -1 135.59 18
 11 -1 1 137.59 8.7
 11 -1 1 131.79 17
 11 -1 1 130.39 13.5
 11 -1 1 133.39 12.6
 11 -1 1 131.89 8.7
 11 -1 1 128.89 12
 -10 1 -1 322.67 26.1
 -10 1 -1 330.67 24.4
 -10 1 -1 295.67 24.6
 -10 1 -1 327.47 24.4
 10 -1 1 303.97 22.9
 10 -1 1 305.67 20.6
 10 -1 1 311.47 23.1
 10 -1 1 337.57 17.7
 10 -1 1 307.67 21
 10 -1 1 295.27 17.7
 10 -1 1 292.77 21.6
 10 -1 1 311.47 21.6
 -9 1 -1 3445.46 182.18
 -9 1 -1 3445.76 182.28
 -9 1 -1 3343.87 182.18
 -9 1 -1 3503.45 183.28
 -9 1 -1 3296.37 183.28
 9 -1 1 3237.38 180.88
 9 -1 1 3532.05 184.98
 9 -1 1 3275.57 182.88
 9 -1 1 3437.76 175.88
 9 -1 1 3584.24 175.98
 9 -1 1 3508.75 176.58
 9 -1 1 3465.55 181.88
 9 -1 1 3367.96 180.88
 9 -1 1 3331.17 176.68
 9 -1 1 3431.86 182.08
 9 -1 1 3612.44 179.28
 9 -1 1 3268.17 182.28
 9 -1 1 3245.48 180.28
 9 -1 1 3446.76 179.88
 9 -1 1 3331.47 180.28
 9 -1 1 3202.28 183.18
 -8 1 -1 309.77 23
 -8 1 -1 329.17 23.1
 -8 1 -1 313.77 23.3
 -8 1 -1 333.17 24.6
 -8 1 -1 303.47 23.6
 8 -1 1 310.27 23.7
 8 -1 1 343.97 22.9
 8 -1 1 326.37 17.5
 8 -1 1 326.17 17.7
 8 -1 1 278.17 23.6
 8 -1 1 307.17 21.4
 8 -1 1 325.27 17.9
 8 -1 1 337.77 17.9
 8 -1 1 313.07 20.6
 8 -1 1 329.47 22
 8 -1 1 302.17 22
 8 -1 1 317.87 21.2
 8 -1 1 319.67 22.9
 8 -1 1 301.87 20.9
 8 -1 1 343.07 20.4
 8 -1 1 327.37 22.3
 8 -1 1 306.67 23.5
 -7 1 -1 -3.7 3.2
 -7 1 -1 1.6 5.1
 -7 1 -1 2.4 4.8
 -7 1 -1 4.3 5.3
 -7 1 -1 9.9 5.7
 7 -1 1 3.2 5.2
 7 -1 1 4.7 2
 7 -1 1 2.5 5.2
 7 -1 1 4.3 5.1
 7 -1 1 4.1 1.5
 7 -1 1 1.2 4
 7 -1 1 0.8 3.3
 7 -1 1 0.3 3.6
 7 -1 1 5 1.6
 7 -1 1 2.9 3.8
 7 -1 1 -2.1 2.9
 7 -1 1 6.9 4
 7 -1 1 9.4 5.1
 7 -1 1 4.7 3.1
 7 -1 1 5.5 4.3
 7 -1 1 4.1 4.4
 7 -1 1 4.8 1.4
 -6 1 -1 126.69 11.4
 -6 1 -1 133.39 11.7
 -6 1 -1 126.79 12.2
 -6 1 -1 131.89 12.6
 -6 1 -1 114.79 11.8
 -6 1 -1 122.69 10.5
 6 -1 1 141.59 10.9
 6 -1 1 132.49 7.3
 6 -1 1 112.49 10.2
 6 -1 1 115.19 9.8
 6 -1 1 127.29 11
 6 -1 1 130.49 9.7
 6 -1 1 126.19 9.3
 6 -1 1 126.59 12.2
 6 -1 1 135.29 7.7
 6 -1 1 113.69 11.8
 6 -1 1 122.09 11.3
 6 -1 1 144.69 12.5
 6 -1 1 111.09 10.9
 6 -1 1 113.69 11
 6 -1 1 130.49 8
 6 -1 1 126.29 11
 6 -1 1 133.59 7.4
 -5 1 -1 243.58 17.2
 -5 1 -1 242.98 16.5
 -5 1 -1 230.68 15.3
 -5 1 -1 222.38 15.7
 -5 1 -1 231.08 15.1
 -5 1 -1 233.48 14.3
 -5 1 -1 247.78 16.5
 -5 1 -1 233.78 16
 5 -1 1 219.98 15.6
 5 -1 1 242.98 14
 5 -1 1 189.28 15.9
 5 -1 1 232.98 12.2
 5 -1 1 197.98 14.4
 5 -1 1 242.48 16.6
 5 -1 1 233.28 15
 5 -1 1 215.18 15.2
 5 -1 1 214.18 15.7
 5 -1 1 239.68 15.2
 5 -1 1 212.28 14.4
 5 -1 1 208.08 14.1
 5 -1 1 239.38 13
 5 -1 1 236.28 12.7
 5 -1 1 191.18 14.9
 5 -1 1 225.98 16.9
 -4 1 -1 6013.7 314.87
 -4 1 -1 5839.02 315.07
 -4 1 -1 6346.17 315.77
 -4 1 -1 6426.56 315.27
 4 -1 1 5998.8 315.27
 4 -1 1 5850.92 314.27
 4 -1 1 5888.71 315.07
 4 -1 1 5995.2 315.57
 -2 1 -1 2948 152.68
 -2 1 -1 2899.81 152.38
 -2 1 -1 2974.6 152.18
 -2 1 -1 2807.12 152.28
 2 -1 1 2948.21 152.38
 2 -1 1 2792.62 150.88
 2 -1 1 2818.82 151.78
 2 -1 1 3168.58 152.78
 1 -1 1 0.9 0.4
 1 1 -1 86.29 5.4
 1 1 -1 84.39 5.4
 1 1 -1 101.99 5.6
 -1 -1 1 94.49 5.4
 -1 -1 1 74.99 4.9
 -1 -1 1 103.39 5.4
 -1 -1 1 100.29 5.2
 -1 -1 1 95.19 5.4
 -1 -1 1 95.89 5.4
 -1 -1 1 74.89 5.4
 -1 -1 1 95.79 5.5
 -1 -1 1 89.19 5.4
 -1 -1 1 97.39 5.6
 2 1 -1 2278.77 111.89
 2 1 -1 2272.87 111.69
 2 1 -1 2252.57 111.69
 2 1 -1 2129.89 111.79
 2 1 -1 2171.98 111.79
 2 1 -1 2120.99 111.79
 -2 -1 1 2071.59 111.59
 -2 -1 1 2069.99 111.69
 -2 -1 1 2156.08 111.69
 -2 -1 1 2059.49 111.69
 -2 -1 1 2115.99 111.69
 -2 -1 1 1966.9 111.39
 3 1 -1 305.77 15.9
 3 1 -1 313.47 15.9
 3 1 -1 293.67 17.6
 3 1 -1 287.27 17.5
 3 1 -1 295.57 17.6
 3 1 -1 305.47 17.3
 3 1 -1 307.57 17.2
 3 1 -1 293.57 17.3
 3 1 -1 320.87 17.6
 3 1 -1 313.77 17.5
 3 1 -1 313.77 17.4
 3 1 -1 324.77 18.2
 3 1 -1 321.47 17.3
 3 1 -1 308.27 18
 3 1 -1 282.57 17.7
 -3 -1 1 287.27 17.8
 -3 -1 1 272.37 17.2
 -3 -1 1 267.67 17.3
 -3 -1 1 279.17 17.5
 -3 -1 1 294.67 17.8
 -3 -1 1 283.27 17.4
 -3 -1 1 286.57 17.3
 4 1 -1 0 2.1
 4 1 -1 1.3 0.8
 4 1 -1 4.4 3.5
 4 1 -1 1.8 2.2
 4 1 -1 1.5 0.9
 4 1 -1 3.4 3
 4 1 -1 0.6 2.3
 4 1 -1 -1.9 2.2
 4 1 -1 2.2 2.8
 4 1 -1 0.9 3.1
 4 1 -1 -1.1 2.2
 4 1 -1 0.8 2.8
 4 1 -1 1.9 2.7
 4 1 -1 1.4 2
 4 1 -1 -0.2 2.3
 -4 -1 1 3.2 3.2
 -4 -1 1 0.8 3
 -4 -1 1 1.6 2.8
 -4 -1 1 0.8 2.5
 -4 -1 1 -1.4 2.7
 -4 -1 1 2.9 3.1
 -4 -1 1 1.5 3.2
 -4 -1 1 1.6 3.2
 -4 -1 1 -0.2 2.7
 -4 -1 1 3.1 2.9
 5 1 -1 687.23 40.8
 5 1 -1 759.02 38.1
 5 1 -1 672.83 40.1
 5 1 -1 723.43 40.5
 5 1 -1 679.43 41.6
 5 1 -1 733.03 40.4
 5 1 -1 725.53 41.1
 5 1 -1 687.93 40.3
 5 1 -1 759.52 38.1
 5 1 -1 705.63 41.5
 5 1 -1 740.63 40.6
 5 1 -1 737.63 40.3
 5 1 -1 730.53 40.9
 5 1 -1 647.44 40.7
 5 1 -1 677.93 41.3
 -5 -1 1 773.12 41.6
 -5 -1 1 771.72 41.3
 -5 -1 1 744.03 41.5
 -5 -1 1 686.13 41.1
 -5 -1 1 771.72 41.4
 -5 -1 1 701.63 40.6
 -5 -1 1 815.22 41.3
 -5 -1 1 749.62 40.9
 -5 -1 1 730.13 40.7
 6 1 -1 731.93 42.9
 6 1 -1 796.32 40.1
 6 1 -1 798.12 40.1
 6 1 -1 751.22 43.5
 6 1 -1 741.83 43
 6 1 -1 739.43 42.6
 6 1 -1 778.82 43
 6 1 -1 718.53 42.6
 6 1 -1 707.83 44
 6 1 -1 725.33 43.6
 6 1 -1 700.33 44.7
 6 1 -1 774.12 44.4
 6 1 -1 777.02 42.9
 6 1 -1 702.63 43.2
 -6 -1 1 777.32 44.2
 -6 -1 1 789.72 44.3
 -6 -1 1 805.32 43.5
 -6 -1 1 838.82 43.7
 -6 -1 1 821.62 44.1
 -6 -1 1 706.33 43.7
 -6 -1 1 843.12 44.2
 7 1 -1 720.13 43.4
 7 1 -1 782.22 39.1
 7 1 -1 756.02 43.4
 7 1 -1 714.73 42.2
 7 1 -1 724.23 44.7
 7 1 -1 776.42 39.1
 7 1 -1 752.62 43.6
 7 1 -1 786.32 42.5
 7 1 -1 692.93 42.4
 7 1 -1 708.13 42.5
 7 1 -1 740.63 42.4
 7 1 -1 740.13 43.2
 7 1 -1 717.03 42.5
 7 1 -1 686.43 43.9
 7 1 -1 705.43 44.1
 -7 -1 1 756.02 46.3
 -7 -1 1 808.92 43.5
 -7 -1 1 796.12 44.4
 -7 -1 1 759.62 43.3
 -7 -1 1 756.02 44
 8 1 -1 137.09 11.8
 8 1 -1 141.09 13.2
 8 1 -1 140.59 7.7
 8 1 -1 152.78 12.4
 8 1 -1 146.49 14.2
 8 1 -1 135.99 12.9
 8 1 -1 132.89 12.8
 8 1 -1 145.69 12.2
 8 1 -1 149.99 12.4
 8 1 -1 140.09 15
 8 1 -1 136.49 11.9
 8 1 -1 123.39 13.7
 8 1 -1 142.89 12.6
 8 1 -1 123.19 11.3
 -8 -1 1 141.59 13.7
 -8 -1 1 126.99 13.8
 -8 -1 1 122.99 13
 -8 -1 1 124.39 14.5
 -8 -1 1 136.79 13.5
 -8 -1 1 124.09 13.1
 9 1 -1 46.2 7.3
 9 1 -1 35.7 10.3
 9 1 -1 42.6 7.8
 9 1 -1 38.4 7.6
 9 1 -1 46.3 3.8
 9 1 -1 41.7 3.4
 9 1 -1 46.8 8.8
 9 1 -1 44.7 7.7
 9 1 -1 50.89 7.9
 9 1 -1 37.1 7.4
 9 1 -1 41.7 9.2
 9 1 -1 44.1 10.1
 9 1 -1 49.7 8.1
 -9 -1 1 39.5 9.8
 -9 -1 1 42.4 9.4
 -9 -1 1 55.79 10.2
 -9 -1 1 44.2 9
 -9 -1 1 55.89 10.4
 -9 -1 1 38.7 9
 10 1 -1 57.69 4.2
 10 1 -1 44 10.9
 10 1 -1 59.39 4.6
 10 1 -1 49.5 10.5
 10 1 -1 53.89 10.9
 10 1 -1 58.99 11.9
 10 1 -1 57.09 9.1
 10 1 -1 54.89 9.1
 10 1 -1 65.89 9.8
 10 1 -1 46.2 10.1
 -10 -1 1 62.79 11.2
 -10 -1 1 50.39 10.7
 -10 -1 1 60.89 11.3
 -10 -1 1 65.79 12.1
 11 1 -1 35.1 7.5
 11 1 -1 34.9 3.8
 11 1 -1 28.9 3.1
 11 1 -1 36.4 9.7
 11 1 -1 27.9 6.9
 11 1 -1 43.9 9.3
 -11 -1 1 38 10
 -11 -1 1 47.1 10.7
 -11 -1 1 21.4 9.2
 12 1 -1 31.6 3.6
 12 1 -1 40.7 7.9
 12 1 -1 25.1 2.9
 12 1 -1 20 7.2
 -12 -1 1 33.9 11
 13 1 -1 9.2 2.2
 13 1 -1 11.3 6.9
 13 1 -1 18.9 6.5
 13 1 -1 14.7 2.6
 14 1 -1 87.69 11
 14 1 -1 83.69 12.5
 14 1 -1 94.89 6.2
 15 1 -1 -4.9 5.9
 15 1 -1 7.6 5.8
 15 -1 0 -9.8 4.8
 14 -1 0 -5.6 4.9
 14 -1 0 2.1 1.7
 14 -1 0 3.5 6.7
 13 -1 0 14.6 6.7
 13 -1 0 15.5 6.4
 13 -1 0 14.6 2.4
 13 -1 0 16.8 2.6
 12 -1 0 21.9 6.3
 12 -1 0 15.7 2.6
 12 -1 0 15.2 2.4
 12 -1 0 5.2 6
 -11 1 0 161.48 17.2
 -11 1 0 146.89 18.6
 11 -1 0 132.29 8.4
 11 -1 0 131.59 14.3
 11 -1 0 127.09 13.3
 11 -1 0 139.59 12.6
 11 -1 0 137.59 8.5
 11 -1 0 137.09 12.9
 -10 1 0 26.3 8.3
 -10 1 0 18.8 9.4
 -10 1 0 23.1 8.5
 10 -1 0 17.3 2.6
 10 -1 0 30.2 8
 10 -1 0 23 7
 10 -1 0 23.5 6.3
 10 -1 0 23.6 2.6
 10 -1 0 13.5 6.1
 10 -1 0 12.4 6.2
 10 -1 0 22.8 9.4
 10 -1 0 15.7 8.3
 -9 1 0 400.26 28.2
 -9 1 0 399.26 27.7
 -9 1 0 400.86 29
 -9 1 0 415.76 27.8
 -9 1 0 412.76 27.8
 9 -1 0 431.86 25.1
 9 -1 0 443.06 30.4
 9 -1 0 380.86 28.3
 9 -1 0 389.76 21.4
 9 -1 0 395.06 25.3
 9 -1 0 385.56 26.8
 9 -1 0 355.06 25.1
 9 -1 0 408.06 28.6
 9 -1 0 394.36 21.3
 9 -1 0 397.86 27.3
 9 -1 0 362.06 27.2
 9 -1 0 401.06 28.6
 9 -1 0 412.56 27.3
 9 -1 0 373.46 25.8
 9 -1 0 376.96 25.6
 -8 1 0 275.97 22.2
 -8 1 0 304.77 21.4
 -8 1 0 282.77 21.7
 -8 1 0 334.07 21.7
 -8 1 0 301.77 21.7
 8 -1 0 276.17 19.4
 8 -1 0 276.47 15.4
 8 -1 0 285.97 20.9
 8 -1 0 276.17 20.2
 8 -1 0 291.07 19.1
 8 -1 0 255.17 21.5
 8 -1 0 288.47 19.8
 8 -1 0 260.47 19
 8 -1 0 286.57 22
 8 -1 0 300.47 19.8
 8 -1 0 283.37 20.7
 8 -1 0 296.97 20.7
 8 -1 0 261.67 22
 8 -1 0 303.77 18.9
 -7 1 0 37.7 7.7
 -7 1 0 36.6 7.5
 -7 1 0 32.6 7.4
 -7 1 0 31.6 6.5
 -7 1 0 36 6.9
 -7 1 0 30.4 7.2
 7 -1 0 24.1 6.3
 7 -1 0 29.7 6.6
 7 -1 0 37 5.5
 7 -1 0 34.9 6.4
 7 -1 0 35.4 2.6
 7 -1 0 32.1 6.7
 7 -1 0 29.5 2.3
 7 -1 0 26.1 5.4
 7 -1 0 41 7.8
 7 -1 0 33.7 6
 7 -1 0 25.3 7.4
 7 -1 0 34 6.1
 7 -1 0 32 6.4
 7 -1 0 32.6 5.8
 7 -1 0 33.6 7.9
 -6 1 0 819.12 44.2
 -6 1 0 799.92 44
 -6 1 0 806.12 44.6
 -6 1 0 803.32 44.2
 -6 1 0 768.02 44.9
 -6 1 0 773.92 45
 -6 1 0 841.22 43.6
 -6 1 0 794.42 45.6
 -6 1 0 809.92 44.1
 -6 1 0 813.42 44.9
 6 -1 0 740.93 43.5
 6 -1 0 725.33 44.5
 6 -1 0 756.12 44.3
 6 -1 0 795.82 40.8
 6 -1 0 750.42 44.3
 6 -1 0 787.42 42.8
 6 -1 0 731.83 43.1
 6 -1 0 804.52 46.1
 6 -1 0 696.33 43.8
 6 -1 0 766.92 43.4
 6 -1 0 785.32 40.6
 6 -1 0 748.73 44.6
 6 -1 0 764.92 45.3
 6 -1 0 768.62 43.8
 -5 1 0 314.97 19.1
 -5 1 0 337.87 19
 -5 1 0 320.47 20.5
 -5 1 0 334.87 19.1
 -5 1 0 307.27 19.4
 -5 1 0 303.37 19.9
 -5 1 0 321.77 20.1
 -5 1 0 310.37 18.9
 -5 1 0 288.07 18.1
 -5 1 0 289.67 19.3
 5 -1 0 294.87 20.1
 5 -1 0 289.27 19
 5 -1 0 304.97 16.1
 5 -1 0 306.57 20
 5 -1 0 288.67 18.8
 5 -1 0 290.57 18.5
 5 -1 0 271.47 19.1
 5 -1 0 279.47 18.1
 5 -1 0 265.47 20
 5 -1 0 272.77 18.1
 5 -1 0 288.77 18.4
 5 -1 0 293.27 18
 5 -1 0 316.97 17.8
 5 -1 0 265.47 18.8
 -4 1 0 44.4 4.9
 -4 1 0 34.4 5.6
 -4 1 0 36.4 4.7
 -4 1 0 41.7 5.8
 -4 1 0 40.7 5.1
 -4 1 0 43.8 5.6
 -4 1 0 37.1 5
 -4 1 0 32.6 5.4
 -4 1 0 35.9 5.4
 -4 1 0 41.5 6.2
 4 -1 0 36.8 6.3
 4 -1 0 39.3 6.1
 4 -1 0 48.7 5
 4 -1 0 37.2 4.6
 4 -1 0 40.1 4.7
 4 -1 0 38.8 2.5
 4 -1 0 34.7 5.1
 4 -1 0 29.2 4.3
 4 -1 0 27.4 5.1
 4 -1 0 48.3 5.9
 4 -1 0 44.4 5.2
 4 -1 0 29.8 4.7
 4 -1 0 34.9 5.8
 4 -1 0 41.5 4.1
 4 -1 0 37.7 2.7
 -3 1 0 1008.4 56.29
 -3 1 0 1002 56.49
 -3 1 0 991.5 55.89
 -3 1 0 1030.4 55.59
 -3 1 0 1068.59 55.59
 -3 1 0 1028 55.89
 -3 1 0 1044.9 55.89
 -3 1 0 1011.9 56.19
 -3 1 0 1051.59 55.39
 -3 1 0 951.6 55.59
 3 -1 0 1024.2 55.69
 3 -1 0 1130.69 54.19
 3 -1 0 1093.99 55.99
 3 -1 0 1058.69 56.69
 3 -1 0 1046.9 54.09
 3 -1 0 1117.89 56.19
 3 -1 0 1043.2 55.99
 3 -1 0 1085.49 56.49
 3 -1 0 1064.19 55.59
 3 -1 0 993.7 55.29
 3 -1 0 988.6 55.29
 3 -1 0 1106.39 55.79
 3 -1 0 1028.3 56.49
 3 -1 0 1040.5 55.29
 -2 1 0 2059.79 116.89
 -2 1 0 2307.57 116.79
 -2 1 0 1996.1 116.49
 -2 1 0 2126.79 116.49
 -2 1 0 2364.56 116.79
 -2 1 0 2109.59 117.29
 -2 1 0 2196.18 117.49
 -2 1 0 2335.37 117.29
 -2 1 0 2105.09 116.99
 -2 1 0 2166.08 116.99
 2 -1 0 2216.68 116.99
 2 -1 0 2401.56 117.19
 2 -1 0 2374.56 117.69
 2 -1 0 2409.16 117.59
 2 -1 0 2453.65 117.49
 1 -1 0 -0.1 0.1
 1 1 0 -0.1 0.2
 1 1 0 0.4 0.4
 1 1 0 0.1 0.1
 1 1 0 -0.2 0.2
 2 1 0 2362.86 116.79
 2 1 0 2462.65 117.39
 2 1 0 2356.86 116.89
 2 1 0 2220.28 116.89
 2 1 0 2283.97 117.19
 -2 -1 0 2150.88 116.79
 -2 -1 0 2239.18 116.99
 -2 -1 0 2165.28 117.09
 -2 -1 0 2238.48 116.89
 -2 -1 0 2206.98 117.09
 -2 -1 0 1990.1 116.79
 -2 -1 0 2212.18 117.09
 3 1 0 1087.99 56.59
 3 1 0 1037.8 56.79
 3 1 0 1049.3 56.79
 3 1 0 1084.79 57.09
 3 1 0 1034.2 55.49
 3 1 0 1055.19 55.49
 3 1 0 1123.49 56.89
 3 1 0 1083.39 57.19
 3 1 0 1040.6 57.09
 3 1 0 1089.79 56.69
 3 1 0 1033.2 57.09
 3 1 0 1071.79 57.39
 3 1 0 1062.59 56.79
 3 1 0 1061.69 56.59
 3 1 0 1045.6 57.49
 -3 -1 0 993.6 56.99
 -3 -1 0 1017.2 57.29
 -3 -1 0 1147.29 55.29
 -3 -1 0 1061.09 57.19
 -3 -1 0 1025.6 56.79
 -3 -1 0 1181.28 55.29
 -3 -1 0 1068.59 57.39
 -3 -1 0 1048.3 56.89
 -3 -1 0 1039.6 56.89
 4 1 0 42.2 5
 4 1 0 42.6 5.2
 4 1 0 43.7 4.8
 4 1 0 44.3 5.1
 4 1 0 40 5.8
 4 1 0 42.2 5.3
 4 1 0 37.5 2.8
 4 1 0 40.9 5.5
 4 1 0 46.2 5.4
 4 1 0 28 5
 4 1 0 44.7 5.5
 4 1 0 39.1 6.1
 4 1 0 38 2.9
 4 1 0 41.9 4.9
 4 1 0 32.1 5.2
 -4 -1 0 37.7 5.6
 -4 -1 0 41.4 5.9
 -4 -1 0 45.6 5.7
 -4 -1 0 41.2 5.7
 -4 -1 0 29.5 5.5
 -4 -1 0 30.6 4.6
 -4 -1 0 42.2 6
 -4 -1 0 42.7 5.6
 5 1 0 321.87 18.7
 5 1 0 281.27 18.7
 5 1 0 286.37 19.9
 5 1 0 275.17 18.3
 5 1 0 310.47 20
 5 1 0 320.07 18.9
 5 1 0 313.27 16.6
 5 1 0 313.67 19.7
 5 1 0 292.87 18.9
 5 1 0 303.27 16.6
 5 1 0 303.97 19.5
 5 1 0 301.07 20.3
 5 1 0 313.77 19
 5 1 0 282.67 19
 5 1 0 298.47 19.4
 -5 -1 0 313.07 19.9
 -5 -1 0 333.97 20
 -5 -1 0 311.47 19.3
 -5 -1 0 341.97 19.7
 -5 -1 0 277.97 19.5
 -5 -1 0 303.57 20.1
 -5 -1 0 334.67 20.4
 -5 -1 0 295.87 19.1
 6 1 0 824.22 44.1
 6 1 0 717.93 43.8
 6 1 0 770.82 44
 6 1 0 817.92 40.8
 6 1 0 807.82 41.4
 6 1 0 736.63 44.6
 6 1 0 746.83 45.1
 6 1 0 735.03 44.4
 6 1 0 770.92 41.3
 6 1 0 763.82 45.4
 6 1 0 736.43 47.5
 6 1 0 765.52 44
 6 1 0 791.02 43.6
 6 1 0 865.71 41.4
 6 1 0 763.72 44.7
 6 1 0 735.33 44.4
 6 1 0 755.42 44.4
 -6 -1 0 791.62 44.6
 -6 -1 0 793.32 45.5
 -6 -1 0 865.61 45.8
 -6 -1 0 803.52 44.5
 -6 -1 0 829.22 45.3
 -6 -1 0 756.72 44.3
 -6 -1 0 816.92 45.1
 7 1 0 20.6 6.5
 7 1 0 30.7 5.9
 7 1 0 30.6 6.6
 7 1 0 31.3 6.6
 7 1 0 29.3 2.6
 7 1 0 27.7 7.4
 7 1 0 42.6 6.2
 7 1 0 30.7 2.8
 7 1 0 35.9 7.9
 7 1 0 22.2 5.8
 7 1 0 29.5 3
 7 1 0 26.4 6
 7 1 0 27.7 5.8
 7 1 0 30.4 5.8
 7 1 0 24.5 2.4
 7 1 0 32.1 6.5
 7 1 0 31.8 5.5
 -7 -1 0 42.2 8
 -7 -1 0 19.6 6.7
 -7 -1 0 34.4 7.1
 -7 -1 0 36.5 6.9
 -7 -1 0 40 7
 -7 -1 0 26.6 7.2
 8 1 0 311.67 21.7
 8 1 0 275.57 20.7
 8 1 0 287.97 16.4
 8 1 0 309.47 20.5
 8 1 0 288.97 19.6
 8 1 0 275.37 20.9
 8 1 0 314.37 20.5
 8 1 0 308.87 16.4
 8 1 0 294.37 20.1
 8 1 0 309.37 22.5
 8 1 0 275.47 19.9
 8 1 0 280.37 22.4
 8 1 0 310.57 16.4
 8 1 0 301.97 16.3
 8 1 0 281.67 21
 8 1 0 269.77 22.3
 8 1 0 337.07 20.2
 -8 -1 0 293.67 21.9
 -8 -1 0 290.47 22.3
 -8 -1 0 303.27 21.9
 -8 -1 0 301.77 21.2
 -8 -1 0 269.77 21.8
 -8 -1 0 317.67 21.5
 9 1 0 397.06 24.8
 9 1 0 398.96 26.5
 9 1 0 375.96 20.8
 9 1 0 391.56 26.3
 9 1 0 375.56 25.3
 9 1 0 389.56 21
 9 1 0 414.96 24.9
 9 1 0 346.67 27.9
 9 1 0 389.36 27.6
 9 1 0 382.26 28.5
 9 1 0 388.96 27.3
 9 1 0 358.26 25.1
 9 1 0 367.06 26.2
 -9 -1 0 377.86 27.5
 -9 -1 0 374.46 26.8
 -9 -1 0 369.56 26.8
 -9 -1 0 375.76 27.9
 -9 -1 0 375.66 26.2
 10 1 0 27.5 7.2
 10 1 0 18.1 5.9
 10 1 0 20 3
 10 1 0 15.4 8.2
 10 1 0 18.1 7.8
 10 1 0 20 2.7
 10 1 0 39.2 8.1
 10 1 0 29.4 6.9
 -10 -1 0 21.3 8.3
 -10 -1 0 4.3 7.1
 -10 -1 0 21.9 8.7
 -10 -1 0 22.9 8.8
 11 1 0 130.79 16.8
 11 1 0 129.59 14.5
 11 1 0 156.98 13.8
 11 1 0 140.29 8.8
 11 1 0 134.19 13.1
 11 1 0 135.69 14.5
 11 1 0 148.29 9.2
 -11 -1 0 152.28 17.1
 -11 -1 0 136.09 17.3
 -11 -1 0 135.59 17.7
 -11 -1 0 157.68 18
 12 1 0 2.3 5.6
 12 1 0 15.7 6.7
 12 1 0 12 2.4
 12 1 0 18.9 3
 -12 -1 0 15.7 9.6
 -12 -1 0 11.2 8.7
 13 1 0 12.5 6.4
 13 1 0 7.3 6.3
 13 1 0 22.7 3.3
 -13 -1 0 16.6 9.8
 14 1 0 -4 4.9
 14 1 0 10.7 2.5
 14 1 0 2.9 5.7
 15 1 0 1.3 5.9
 15 1 0 0 5.7
 15 -1 -1 -5.6 5.7
 15 -1 -1 -3.5 5.4
 14 -1 -1 83.09 11.8
 14 -1 -1 73.39 10.4
 13 -1 -1 13.3 2
 13 -1 -1 16.5 6.4
 13 -1 -1 10.1 1.8
 13 -1 -1 8.2 7
 12 -1 -1 12.9 6
 12 -1 -1 27.6 7.8
 12 -1 -1 24.6 2.8
 12 -1 -1 25.9 2.6
 -11 1 1 34.1 9.7
 11 -1 -1 31.6 2.9
 11 -1 -1 30.5 7.2
 11 -1 -1 37.7 10.5
 11 -1 -1 29.5 2.7
 11 -1 -1 38.4 8.1
 -10 1 1 61.39 12.2
 -10 1 1 40.2 10
 10 -1 -1 59.59 8.8
 10 -1 -1 39.4 8.1
 10 -1 -1 72.39 12.2
 10 -1 -1 46.8 3.6
 10 -1 -1 66.99 12.2
 10 -1 -1 37.1 10.4
 10 -1 -1 57.59 9
 10 -1 -1 58.79 11.6
 10 -1 -1 47.4 8.2
 10 -1 -1 53.29 9.7
 -9 1 1 47.8 9.7
 -9 1 1 47.3 9.5
 -9 1 1 58.09 11.5
 9 -1 -1 54.79 10.2
 9 -1 -1 42.8 8.8
 9 -1 -1 52.29 7.9
 9 -1 -1 24 9.1
 9 -1 -1 45 9.2
 9 -1 -1 41.7 9.4
 9 -1 -1 43.1 11.8
 9 -1 -1 39.2 7.9
 9 -1 -1 49.6 8
 9 -1 -1 45.1 7.3
 9 -1 -1 47.4 9.8
 9 -1 -1 47.5 10
 -8 1 1 166.78 14.8
 -8 1 1 146.69 13.9
 -8 1 1 150.38 14
 -8 1 1 156.28 14.8
 -8 1 1 158.28 15.6
 8 -1 -1 136.09 11.9
 8 -1 -1 145.19 14.9
 8 -1 -1 139.19 14.5
 8 -1 -1 151.78 12
 8 -1 -1 131.99 12.2
 8 -1 -1 152.58 12.5
 8 -1 -1 158.28 13.2
 8 -1 -1 128.89 12.6
 8 -1 -1 140.49 13.7
 8 -1 -1 158.08 13.9
 8 -1 -1 144.49 12.1
 8 -1 -1 130.59 14.8
 8 -1 -1 139.39 11.9
 -7 1 1 788.92 45.2
 -7 1 1 739.03 43
 -7 1 1 751.72 44.1
 -7 1 1 735.13 43.3
 -7 1 1 809.02 46.1
 -7 1 1 771.32 44.2
 -7 1 1 784.32 43.5
 7 -1 -1 751.12 43.9
 7 -1 -1 703.53 44.5
 7 -1 -1 691.13 42.8
 7 -1 -1 687.73 42.1
 7 -1 -1 792.32 42.2
 7 -1 -1 724.03 42.4
 7 -1 -1 745.03 42.7
 7 -1 -1 724.23 45
 7 -1 -1 741.53 42.5
 7 -1 -1 755.22 42.4
 7 -1 -1 764.82 43.5
 7 -1 -1 699.53 43.5
 7 -1 -1 778.32 44.8
 -6 1 1 768.32 42.1
 -6 1 1 786.02 42.6
 -6 1 1 807.62 42.8
 -6 1 1 804.32 43.7
 -6 1 1 773.02 44
 -6 1 1 781.72 42.5
 -6 1 1 867.31 43.5
 -6 1 1 771.82 43.4
 -6 1 1 760.12 42.9
 -6 1 1 745.33 42.8
 -6 1 1 715.63 42.7
 6 -1 -1 701.13 44
 6 -1 -1 674.33 44.3
 6 -1 -1 712.73 41.8
 6 -1 -1 755.12 42
 6 -1 -1 708.43 43.5
 6 -1 -1 725.83 43.8
 6 -1 -1 753.72 42.1
 6 -1 -1 711.63 42.8
 6 -1 -1 660.53 42.1
 6 -1 -1 724.43 42.7
 6 -1 -1 730.93 42.1
 6 -1 -1 765.92 41.6
 -5 1 1 786.32 41.1
 -5 1 1 781.32 41.2
 -5 1 1 764.92 41.6
 -5 1 1 784.32 41.6
 -5 1 1 723.33 40.7
 -5 1 1 772.02 41.1
 -5 1 1 705.33 41.2
 -5 1 1 806.82 40.9
 -5 1 1 755.32 42
 -5 1 1 747.33 42.3
 -5 1 1 715.53 41.7
 -5 1 1 810.72 41.8
 5 -1 -1 691.33 40.5
 5 -1 -1 727.83 41.5
 5 -1 -1 725.13 40.6
 5 -1 -1 715.83 40.5
 5 -1 -1 699.73 40.7
 5 -1 -1 668.83 40.3
 5 -1 -1 696.43 40.9
 5 -1 -1 714.73 42.2
 5 -1 -1 674.43 42.3
 5 -1 -1 688.03 41.5
 5 -1 -1 744.53 41.4
 5 -1 -1 679.23 41.8
 -4 1 1 -3 2.3
 -4 1 1 1.7 2.4
 -4 1 1 2.6 3.5
 -4 1 1 2.9 3.1
 -4 1 1 -2.8 2.8
 -4 1 1 2.8 3
 -4 1 1 2.6 2.7
 -4 1 1 1 2.5
 -4 1 1 -1.6 2.5
 -4 1 1 4.7 2.9
 -4 1 1 -1.4 3.4
 -4 1 1 1.5 3.3
 4 -1 -1 -0.5 2.2
 4 -1 -1 3.4 2.4
 4 -1 -1 5.3 2.7
 4 -1 -1 0.3 2
 4 -1 -1 0.7 2.8
 4 -1 -1 -0.3 3.4
 4 -1 -1 -2.5 3.5
 4 -1 -1 1 2.6
 4 -1 -1 0.4 2.8
 4 -1 -1 -0.8 2.1
 4 -1 -1 0.4 2.2
 4 -1 -1 -5.5 2.7
 -3 1 1 284.97 17.1
 -3 1 1 260.87 17.2
 -3 1 1 294.97 17.5
 -3 1 1 271.87 17.4
 -3 1 1 283.47 17.7
 -3 1 1 293.37 17.2
 -3 1 1 278.67 17.2
 -3 1 1 300.47 17.8
 -3 1 1 289.97 17.2
 3 -1 -1 315.97 17.6
 3 -1 -1 304.57 17.1
 3 -1 -1 319.57 17.2
 3 -1 -1 312.87 17.2
 3 -1 -1 307.57 17.7
 3 -1 -1 305.67 17.2
 3 -1 -1 307.47 18.3
 3 -1 -1 305.17 17.9
 3 -1 -1 299.17 17
 3 -1 -1 305.47 18.4
 3 -1 -1 294.87 17.3
 3 -1 -1 312.57 18
 -2 1 1 2062.59 110.29
 -2 1 1 2115.49 110.99
 -2 1 1 2034.7 110.19
 -2 1 1 2081.19 110.19
 -2 1 1 2116.69 110.59
 -2 1 1 2016.6 110.39
 -2 1 1 1906.71 110.59
 -2 1 1 2057.69 110.29
 -2 1 1 1904.01 109.99
 -2 1 1 2012.9 110.29
 -2 1 1 2047.5 110.89
 2 -1 -1 2174.08 109.29
 2 -1 -1 2333.77 110.39
 2 -1 -1 2177.08 110.79
 2 -1 -1 2202.08 110.29
 2 -1 -1 2222.18 111.09
 2 -1 -1 2222.08 110.59
 2 -1 -1 2224.68 111.09
 2 -1 -1 2259.97 110.89
 2 -1 -1 2135.09 110.39
 -1 1 1 86.79 5.2
 -1 1 1 99.29 5.6
 -1 1 1 93.69 5.6
 -1 1 1 91.09 5
 -1 1 1 83.89 5
 -1 1 1 94.29 5
 -1 1 1 95.39 5.2
 1 -1 -1 71.29 4.9
 1 -1 -1 70.89 5.4
 1 -1 -1 72.59 5.5
 1 -1 -1 77.99 5.4
 2 1 1 2800.12 148.59
 2 1 1 2997.5 149.19
 -2 -1 -1 2822.72 149.19
 -2 -1 -1 2714.93 148.99
 -2 -1 -1 2947.51 149.09
 -2 -1 -1 2859.81 148.59
 4 1 1 5876.41 315.67
 4 1 1 5966 316.17
 4 1 1 5801.32 316.67
 4 1 1 6232.58 316.87
 -4 -1 -1 6342.97 316.97
 -4 -1 -1 6086.89 316.57
 -4 -1 -1 6227.58 316.07
 5 1 1 200.78 14.5
 5 1 1 216.78 14.7
 5 1 1 221.48 15.3
 5 1 1 222.28 12.2
 5 1 1 198.98 14.9
 5 1 1 207.18 14.6
 5 1 1 219.38 14
 5 1 1 231.88 12.5
 5 1 1 229.88 14.1
 5 1 1 228.88 14.8
 5 1 1 208.08 14.3
 5 1 1 228.38 12.7
 5 1 1 217.88 15.8
 5 1 1 238.18 12.2
 5 1 1 209.58 15.9
 5 1 1 206.18 15.2
 5 1 1 220.18 15.4
 -5 -1 -1 208.18 14.9
 -5 -1 -1 230.48 16.2
 -5 -1 -1 229.78 15.7
 -5 -1 -1 199.98 14.7
 -5 -1 -1 224.58 15.8
 -5 -1 -1 222.98 16.1
 -5 -1 -1 232.48 15.3
 6 1 1 112.99 9.1
 6 1 1 130.69 7.5
 6 1 1 107.19 9.9
 6 1 1 114.59 10.9
 6 1 1 100.59 11.3
 6 1 1 133.89 9.5
 6 1 1 99.79 9.7
 6 1 1 127.89 7.2
 6 1 1 122.79 7.2
 6 1 1 122.29 7.7
 6 1 1 109.99 10.4
 6 1 1 120.29 9.8
 6 1 1 101.39 10.3
 6 1 1 121.09 10.1
 6 1 1 113.69 10.5
 6 1 1 120.79 9.8
 6 1 1 122.69 11.4
 -6 -1 -1 118.69 10.6
 -6 -1 -1 100.49 11.6
 -6 -1 -1 120.59 11.4
 -6 -1 -1 132.59 11
 -6 -1 -1 115.39 10.9
 -6 -1 -1 112.19 11.5
 -6 -1 -1 111.29 10.4
 7 1 1 -2.9 3.8
 7 1 1 5.5 4.1
 7 1 1 2.3 1.4
 7 1 1 -0.8 2.8
 7 1 1 2 1.5
 7 1 1 3.8 5.2
 7 1 1 0.2 4.3
 7 1 1 8.7 5
 7 1 1 9.9 4.5
 7 1 1 7.1 4.1
 7 1 1 3.7 3.5
 7 1 1 7.2 4.3
 7 1 1 1.1 1.5
 7 1 1 3 4.3
 7 1 1 3.5 4
 7 1 1 0.7 1.7
 7 1 1 -1.6 3.5
 -7 -1 -1 6.2 5.3
 -7 -1 -1 2.9 5.4
 -7 -1 -1 3 4.4
 -7 -1 -1 6.1 5
 -7 -1 -1 -1.5 4.9
 -7 -1 -1 2.6 5.2
 -7 -1 -1 -5.9 4.3
 8 1 1 312.37 17.6
 8 1 1 311.27 20.8
 8 1 1 308.07 21.3
 8 1 1 342.37 20.6
 8 1 1 302.07 21.6
 8 1 1 296.47 21.1
 8 1 1 306.77 22.1
 8 1 1 290.07 17.4
 8 1 1 357.56 20.7
 8 1 1 301.77 17.7
 8 1 1 304.37 23.7
 8 1 1 298.27 22.2
 8 1 1 312.57 22.1
 8 1 1 326.77 17.5
 8 1 1 317.17 23.2
 8 1 1 301.67 21
 -8 -1 -1 323.97 22.3
 -8 -1 -1 306.87 22.7
 -8 -1 -1 333.87 22.3
 -8 -1 -1 309.17 23.7
 -8 -1 -1 328.87 23.6
 -8 -1 -1 317.17 23
 9 1 1 3350.36 178.28
 9 1 1 3409.16 180.78
 9 1 1 3391.56 179.88
 9 1 1 3364.86 174.98
 9 1 1 3220.58 178.98
 9 1 1 3231.78 179.98
 9 1 1 3252.47 179.18
 9 1 1 3477.75 174.88
 9 1 1 3319.27 180.08
 9 1 1 3474.15 175.18
 9 1 1 3248.48 180.68
 9 1 1 3486.65 174.68
 9 1 1 3503.55 178.08
 -9 -1 -1 3290.17 180.68
 -9 -1 -1 3402.56 180.68
 -9 -1 -1 3329.77 181.18
 -9 -1 -1 3466.15 180.08
 -9 -1 -1 3303.37 181.08
 10 1 1 308.07 21.8
 10 1 1 336.37 25.1
 10 1 1 316.67 21.8
 10 1 1 320.67 23.6
 10 1 1 322.77 22.9
 10 1 1 330.97 18.7
 10 1 1 319.17 18.4
 10 1 1 294.97 22.4
 -10 -1 -1 331.77 25.9
 -10 -1 -1 362.76 25.6
 -10 -1 -1 344.67 25.4
 -10 -1 -1 329.17 25.8
 11 1 1 146.09 9.2
 11 1 1 114.69 13.5
 11 1 1 147.29 15.5
 11 1 1 143.89 13.2
 11 1 1 148.99 9.6
 11 1 1 125.99 12.9
 -11 -1 -1 121.69 17
 -11 -1 -1 132.59 17.4
 -11 -1 -1 166.18 18.9
 -11 -1 -1 153.78 18.1
 12 1 1 9.3 3
 12 1 1 8.3 6.1
 12 1 1 5.3 5.4
 12 1 1 7.6 2.6
 -12 -1 -1 5 8.2
 -12 -1 -1 1.9 9.1
 13 1 1 2 5.4
 13 1 1 6.5 2.6
 13 1 1 0.1 2.1
 13 1 1 -1.9 5.1
 -13 -1 -1 8.7 9
 14 1 1 3.1 2.4
 14 1 1 -5.9 5
 14 1 1 -8 5.2
 -14 -1 -1 -23.7 7
 15 1 1 46.3 8.6
 15 1 1 39.1 8.7
 15 -1 -2 6.7 6.4
 15 -1 -2 6.1 6.2
 14 -1 -2 4.9 5.8
 14 -1 -2 1.3 5.7
 13 -1 -2 67.39 10.1
 13 -1 -2 61.19 9.8
 12 -1 -2 98.99 5.8
 12 -1 -2 99.19 11.9
 12 -1 -2 103.59 6
 12 -1 -2 102.19 12.2
 11 -1 -2 32.1 7.5
 11 -1 -2 26.7 2.1
 11 -1 -2 31.4 7.5
 11 -1 -2 24.8 2.2
 10 -1 -2 75.69 11.9
 10 -1 -2 64.79 12.8
 10 -1 -2 91.59 13.1
 10 -1 -2 74.79 11.3
 10 -1 -2 84.89 10.8
 10 -1 -2 87.29 10.5
 10 -1 -2 94.19 14.1
 10 -1 -2 86.19 10.8
 10 -1 -2 69.89 9.9
 10 -1 -2 88.69 12.6
 10 -1 -2 74.49 10.9
 -9 1 2 6.4 6.6
 9 -1 -2 -1.7 4.9
 9 -1 -2 2.5 5
 9 -1 -2 7.7 7.1
 9 -1 -2 5.4 5.2
 9 -1 -2 0.7 6.1
 9 -1 -2 8.1 4.6
 9 -1 -2 0.3 4.3
 9 -1 -2 1.7 5.1
 9 -1 -2 1.1 5.8
 9 -1 -2 9.8 4.9
 9 -1 -2 5 4.3
 9 -1 -2 6.7 7.5
 9 -1 -2 6.9 6.1
 -8 1 2 271.17 20.1
 -8 1 2 304.17 20.8
 -8 1 2 287.97 21.2
 -8 1 2 243.38 21.5
 -8 1 2 271.97 20.2
 -8 1 2 300.67 21
 -8 1 2 307.17 20.9
 8 -1 -2 277.07 21.6
 8 -1 -2 284.37 19.6
 8 -1 -2 276.57 19.3
 8 -1 -2 297.17 20.1
 8 -1 -2 264.37 19.2
 8 -1 -2 304.77 22.9
 8 -1 -2 281.67 21
 8 -1 -2 287.27 20.8
 8 -1 -2 277.07 22.1
 8 -1 -2 297.57 19.4
 8 -1 -2 294.47 19.7
 8 -1 -2 303.57 19.6
 8 -1 -2 288.87 19.3
 8 -1 -2 292.47 20.4
 -7 1 2 80.69 10.1
 -7 1 2 64.19 9.4
 -7 1 2 54.39 9.9
 -7 1 2 53.79 7.9
 -7 1 2 67.89 8.8
 -7 1 2 68.19 10
 -7 1 2 72.49 9.1
 -7 1 2 60.79 10
 -7 1 2 67.09 9.1
 7 -1 -2 62.89 8.7
 7 -1 -2 64.09 7.7
 7 -1 -2 62.69 7.6
 7 -1 -2 56.19 10.1
 7 -1 -2 60.59 8.7
 7 -1 -2 55.09 7.8
 7 -1 -2 70.49 7.8
 7 -1 -2 75.89 10.2
 7 -1 -2 62.59 7.9
 7 -1 -2 58.09 9.3
 7 -1 -2 76.89 11
 7 -1 -2 61.79 8
 7 -1 -2 70.79 8.1
 7 -1 -2 70.59 8.3
 -6 1 2 140.79 11.6
 -6 1 2 164.88 13.4
 -6 1 2 167.08 12.3
 -6 1 2 149.79 12.2
 -6 1 2 158.68 12.8
 -6 1 2 142.59 12.4
 -6 1 2 154.18 11.9
 -6 1 2 166.78 12.5
 -6 1 2 173.78 13.1
 -6 1 2 168.18 13.6
 -6 1 2 136.89 11.8
 -6 1 2 165.98 12.6
 6 -1 -2 152.78 12.2
 6 -1 -2 157.38 11.6
 6 -1 -2 144.49 11.7
 6 -1 -2 168.88 11.7
 6 -1 -2 153.68 11.4
 6 -1 -2 137.89 11.1
 6 -1 -2 144.19 11.4
 6 -1 -2 143.59 13.1
 6 -1 -2 140.29 12.2
 6 -1 -2 150.98 13.6
 6 -1 -2 167.68 13.3
 6 -1 -2 134.79 13.3
 6 -1 -2 144.49 12.1
 -5 1 2 140.89 11.7
 -5 1 2 126.29 10.4
 -5 1 2 138.79 10.3
 -5 1 2 135.89 11
 -5 1 2 136.19 10.1
 -5 1 2 137.09 11.5
 -5 1 2 152.48 11
 -5 1 2 128.59 10.6
 -5 1 2 148.19 11.1
 -5 1 2 122.29 9.8
 -5 1 2 131.99 10.5
 -5 1 2 137.79 10.3
 5 -1 -2 123.99 9.8
 5 -1 -2 115.59 9.4
 5 -1 -2 126.29 9.6
 5 -1 -2 121.19 10.3
 5 -1 -2 141.99 12.1
 5 -1 -2 117.99 10.2
 5 -1 -2 119.99 11.6
 5 -1 -2 126.39 11
 5 -1 -2 135.39 9.7
 5 -1 -2 110.39 9.5
 5 -1 -2 127.29 9.9
 5 -1 -2 119.19 10.8
 5 -1 -2 118.29 9.8
 -4 1 2 475.45 26.3
 -4 1 2 486.55 27
 -4 1 2 417.76 25.7
 -4 1 2 481.05 26.7
 -4 1 2 478.95 26.2
 -4 1 2 455.95 26
 -4 1 2 470.15 27.1
 -4 1 2 481.15 27.3
 -4 1 2 468.05 26.2
 -4 1 2 462.95 26.3
 -4 1 2 488.65 26.1
 -4 1 2 424.66 26.2
 4 -1 -2 422.16 26
 4 -1 -2 466.55 26
 4 -1 -2 462.75 25.7
 4 -1 -2 436.56 25.9
 4 -1 -2 424.76 26.2
 4 -1 -2 496.25 26.2
 4 -1 -2 430.56 25.5
 4 -1 -2 438.66 25.7
 4 -1 -2 444.36 26.9
 4 -1 -2 459.95 23.9
 4 -1 -2 465.35 23.8
 4 -1 -2 456.15 26.8
 4 -1 -2 445.26 27.3
 4 -1 -2 456.45 27.4
 4 -1 -2 426.86 25.6
 -3 1 2 1887.81 99.99
 -3 1 2 1728.33 99.69
 -3 1 2 1829.72 99.79
 -3 1 2 1851.31 100.09
 -3 1 2 1859.41 100.09
 -3 1 2 1900.71 99.99
 -3 1 2 1991.3 99.89
 -3 1 2 1727.43 99.99
 -3 1 2 1792.82 100.59
 -3 1 2 1918.01 100.79
 3 -1 -2 1900.61 98.69
 3 -1 -2 1923.01 99.79
 3 -1 -2 2016.5 98.59
 3 -1 -2 1863.31 99.99
 3 -1 -2 1980.1 100.59
 3 -1 -2 1926.61 99.79
 3 -1 -2 1912.11 99.79
 3 -1 -2 1965.4 101.09
 3 -1 -2 1979 99.99
 3 -1 -2 1973 101.09
 3 -1 -2 1992.2 99.99
 3 -1 -2 1905.41 100.09
 3 -1 -2 1912.61 99.69
 3 -1 -2 1912.41 100.79
 3 -1 -2 1930.71 100.19
 -2 1 2 2037.7 111.29
 -2 1 2 2061.29 110.99
 -2 1 2 1904.71 110.99
 -2 1 2 2081.89 111.39
 -2 1 2 2128.59 111.89
 -2 1 2 2045.5 110.99
 -2 1 2 1992.9 111.79
 2 -1 -2 2281.47 111.49
 2 -1 -2 2134.09 110.99
 2 -1 -2 2217.38 111.59
 2 -1 -2 2244.78 112.09
 2 -1 -2 2326.57 112.09
 2 -1 -2 2131.09 111.19
 2 -1 -2 2182.58 111.19
 2 -1 -2 2145.29 111.29
 2 -1 -2 2210.28 111.89
 1 -1 -2 984.8 51.49
 2 1 2 515.65 26.5
 2 1 2 466.35 26.2
 2 1 2 469.75 25.7
 2 1 2 456.95 25.8
 2 1 2 456.35 25.6
 2 1 2 484.85 26.6
 2 1 2 466.95 25.7
 2 1 2 534.55 26.9
 2 1 2 474.95 26
 2 1 2 496.75 26.3
 2 1 2 480.45 25.9
 -2 -1 -2 469.95 26.6
 -2 -1 -2 479.85 26.8
 -2 -1 -2 441.36 25.6
 -2 -1 -2 527.35 26
 -2 -1 -2 476.35 25.8
 -2 -1 -2 517.45 25.7
 -2 -1 -2 438.36 26.2
 -2 -1 -2 506.25 26
 -3 -1 -2 0.6 0.2
 4 1 2 145.59 8.4
 4 1 2 130.39 9.5
 4 1 2 130.39 8.4
 4 1 2 128.99 10.4
 4 1 2 129.79 9.1
 4 1 2 140.79 8.6
 4 1 2 148.69 10.3
 4 1 2 140.19 10.6
 4 1 2 128.69 10.3
 4 1 2 151.48 10.2
 4 1 2 143.79 10.8
 4 1 2 141.99 8.9
 4 1 2 129.99 9.7
 4 1 2 140.19 9.3
 -4 -1 -2 152.28 11.3
 -4 -1 -2 126.09 10.1
 -4 -1 -2 134.29 11.4
 -4 -1 -2 156.38 8.5
 -4 -1 -2 152.58 9.4
 -4 -1 -2 145.99 11.8
 -4 -1 -2 137.79 10.3
 -4 -1 -2 152.78 10.7
 -4 -1 -2 142.69 10.9
 5 1 2 245.48 16.7
 5 1 2 279.17 17.5
 5 1 2 283.47 16.3
 5 1 2 270.27 15.8
 5 1 2 279.97 18.5
 5 1 2 279.07 17.6
 5 1 2 306.07 16.1
 5 1 2 282.87 20
 5 1 2 246.68 18.3
 5 1 2 313.57 15.9
 5 1 2 309.87 17.2
 5 1 2 244.88 17.6
 -5 -1 -2 264.67 18.1
 -5 -1 -2 315.07 19.8
 -5 -1 -2 266.17 19.3
 -5 -1 -2 292.07 15.6
 -5 -1 -2 294.07 15.5
 -5 -1 -2 287.77 19.1
 -5 -1 -2 307.97 18.6
 -5 -1 -2 268.67 18.8
 6 1 2 7.1 4.5
 6 1 2 1.2 4
 6 1 2 2.6 1.6
 6 1 2 -0.6 1.8
 6 1 2 -2.2 1.4
 6 1 2 4.3 3
 6 1 2 0.9 2.9
 6 1 2 0.2 1.6
 6 1 2 1 3.2
 6 1 2 -7.9 3.4
 6 1 2 -1.4 3.4
 6 1 2 0.3 3
 6 1 2 -0.2 3.7
 6 1 2 3 2.8
 6 1 2 1.5 3.5
 -6 -1 -2 3.6 4.7
 -6 -1 -2 2.2 3.9
 -6 -1 -2 0.7 0.8
 -6 -1 -2 -6.8 3.7
 -6 -1 -2 1.3 0.8
 -6 -1 -2 -4.7 3.6
 -6 -1 -2 -4.6 4.3
 -6 -1 -2 7.8 5.7
 7 1 2 584.84 35.9
 7 1 2 603.14 37.4
 7 1 2 633.74 37.4
 7 1 2 674.63 35.6
 7 1 2 581.94 36.4
 7 1 2 636.34 37.7
 7 1 2 656.43 33.7
 7 1 2 626.84 33.6
 7 1 2 599.64 35.3
 7 1 2 630.54 36.4
 7 1 2 610.64 36.6
 7 1 2 618.44 33.6
 7 1 2 564.24 37
 7 1 2 627.64 34
 7 1 2 558.94 36
 -7 -1 -2 632.24 37.2
 -7 -1 -2 638.44 38.6
 -7 -1 -2 650.33 37.9
 -7 -1 -2 661.13 38.2
 -7 -1 -2 651.93 37.2
 -7 -1 -2 614.44 38.3
 8 1 2 17.8 6.4
 8 1 2 22.7 6.2
 8 1 2 17.7 6.1
 8 1 2 13.6 3
 8 1 2 6.9 6.6
 8 1 2 14.6 3.1
 8 1 2 14.4 3
 8 1 2 9.5 4.5
 8 1 2 18.3 6.6
 8 1 2 28.6 6
 8 1 2 9.2 4.5
 8 1 2 19.1 3.6
 8 1 2 10.2 4.8
 8 1 2 13.6 6.5
 8 1 2 22.9 6.1
 -8 -1 -2 24.3 8.4
 -8 -1 -2 21.8 8.4
 -8 -1 -2 21.1 7.1
 -8 -1 -2 32.3 7.9
 -8 -1 -2 22 7.8
 -8 -1 -2 29.6 7.4
 9 1 2 117.99 8.2
 9 1 2 109.19 8.3
 9 1 2 113.79 12.6
 9 1 2 112.79 11.5
 9 1 2 135.99 11.4
 9 1 2 115.59 8.6
 9 1 2 106.19 10.8
 9 1 2 118.69 12.2
 9 1 2 122.89 13.6
 9 1 2 136.19 13.1
 9 1 2 121.59 8.6
 9 1 2 119.39 14.5
 9 1 2 139.29 12.9
 9 1 2 123.49 12.2
 -9 -1 -2 164.58 15.2
 -9 -1 -2 124.29 15.4
 -9 -1 -2 124.39 13.6
 -9 -1 -2 121.59 15.7
 -9 -1 -2 140.59 15.2
 10 1 2 105.99 13.5
 10 1 2 90.89 12.1
 10 1 2 88.99 6.9
 10 1 2 94.89 11.3
 10 1 2 97.49 7.4
 10 1 2 100.29 11.3
 10 1 2 90.89 6.9
 10 1 2 82.59 10.4
 10 1 2 93.19 6.5
 -10 -1 -2 111.49 15.1
 -10 -1 -2 114.49 15.1
 -10 -1 -2 83.19 13.7
 -10 -1 -2 80.59 13.6
 11 1 2 98.09 10.5
 11 1 2 88.39 13.3
 11 1 2 115.39 15.9
 11 1 2 108.29 8.1
 11 1 2 92.69 10.6
 -11 -1 -2 113.59 16.3
 -11 -1 -2 116.79 15.9
 -11 -1 -2 116.29 16.3
 -11 -1 -2 110.49 16.5
 12 1 2 5.6 2.8
 12 1 2 11.8 2.7
 12 1 2 12.5 5.5
 12 1 2 12.4 5.7
 -12 -1 -2 20.8 9.6
 -12 -1 -2 5.9 8.5
 13 1 2 2.2 2.6
 13 1 2 -1.4 5.3
 13 1 2 -6.6 4.6
 13 1 2 2.3 2.4
 -13 -1 -2 -2.7 9.4
 -13 -1 -2 -2.5 8.9
 -13 -1 -2 6.6 9.7
 14 1 2 5.3 5.6
 14 1 2 10.1 6.5
 14 1 2 16 3.4
 -14 -1 -2 -5.2 8.3
 15 1 2 -15.4 4.4
 15 1 2 -3.6 5.4
 15 -1 -3 -1.7 5.7
 15 -1 -3 5.9 7.6
 14 -1 -3 40.9 8.4
 14 -1 -3 31.4 8.9
 13 -1 -3 78.69 10.8
 13 -1 -3 68.59 10.9
 12 -1 -3 71.79 10.8
 12 -1 -3 67.09 10.2
 11 -1 -3 289.67 21.4
 11 -1 -3 293.57 20.9
 10 -1 -3 7.6 5.2
 10 -1 -3 10.5 6.5
 10 -1 -3 2.9 6.9
 10 -1 -3 8.7 5.8
 10 -1 -3 10.1 4.9
 10 -1 -3 4.7 4.6
 10 -1 -3 8.9 5.4
 10 -1 -3 14.9 7.7
 10 -1 -3 -3.2 4.3
 10 -1 -3 10.6 5.9
 10 -1 -3 -7.2 5.2
 -9 1 3 7.5 6.6
 9 -1 -3 9.5 4.8
 9 -1 -3 0.1 4.5
 9 -1 -3 6.3 5.4
 9 -1 -3 3.1 4.7
 9 -1 -3 3.6 4.9
 9 -1 -3 -1.4 4.4
 9 -1 -3 0.3 7.5
 9 -1 -3 10.8 5.3
 9 -1 -3 4 4.9
 9 -1 -3 6.7 5.9
 9 -1 -3 14.6 5.1
 9 -1 -3 9 6.3
 -8 1 3 156.58 14.5
 -8 1 3 153.88 13.5
 -8 1 3 160.98 13.8
 -8 1 3 161.68 14.5
 8 -1 -3 140.39 12.4
 8 -1 -3 166.58 16
 8 -1 -3 130.89 14.3
 8 -1 -3 151.48 12.5
 8 -1 -3 160.08 12.6
 8 -1 -3 149.99 12.9
 8 -1 -3 146.19 12.7
 8 -1 -3 143.69 13.5
 8 -1 -3 140.59 15.4
 8 -1 -3 155.18 12.3
 8 -1 -3 143.49 14.4
 8 -1 -3 166.68 13
 8 -1 -3 150.98 13.9
 8 -1 -3 160.28 12.6
 -7 1 3 97.49 10.1
 -7 1 3 106.59 10.8
 -7 1 3 97.39 10.1
 -7 1 3 86.29 9.9
 -7 1 3 101.19 10.3
 -7 1 3 116.49 10.8
 7 -1 -3 94.09 10.9
 7 -1 -3 94.69 10.1
 7 -1 -3 97.49 9.3
 7 -1 -3 96.79 9.5
 7 -1 -3 109.89 13.1
 7 -1 -3 94.59 11
 7 -1 -3 103.09 9.2
 7 -1 -3 95.59 9.6
 7 -1 -3 113.39 12.2
 7 -1 -3 113.19 9.4
 7 -1 -3 100.19 9.6
 7 -1 -3 107.59 9.6
 7 -1 -3 101.89 9.2
 7 -1 -3 104.79 11.4
 -6 1 3 1189.18 64.59
 -6 1 3 1251.17 65.99
 -6 1 3 1134.09 65.19
 -6 1 3 1216.48 64.99
 -6 1 3 1241.18 65.29
 -6 1 3 1205.68 64.99
 -6 1 3 1119.09 64.49
 -6 1 3 1249.77 65.09
 -6 1 3 1231.18 64.89
 6 -1 -3 1126.49 66.39
 6 -1 -3 1180.68 65.29
 6 -1 -3 1128.49 65.79
 6 -1 -3 1215.88 64.09
 6 -1 -3 1136.29 64.19
 6 -1 -3 1129.79 63.99
 6 -1 -3 1187.68 64.59
 6 -1 -3 1223.08 61.19
 6 -1 -3 1244.18 64.39
 6 -1 -3 1136.09 66.49
 6 -1 -3 1124.29 64.49
 6 -1 -3 1175.48 64.69
 6 -1 -3 1205.48 61.19
 6 -1 -3 1139.99 64.79
 6 -1 -3 1150.08 65.99
 -5 1 3 926.81 48.9
 -5 1 3 905.51 48.5
 -5 1 3 929.81 48.7
 -5 1 3 914.31 48.7
 -5 1 3 935.21 48.5
 -5 1 3 909.91 48.5
 -5 1 3 878.21 48.8
 -5 1 3 921.01 49.7
 -5 1 3 841.22 48.8
 5 -1 -3 801.02 47.9
 5 -1 -3 816.42 48.7
 5 -1 -3 811.12 48.5
 5 -1 -3 852.01 49.7
 5 -1 -3 879.31 48
 5 -1 -3 904.11 46
 5 -1 -3 843.22 48.3
 5 -1 -3 870.11 50.19
 5 -1 -3 869.11 48
 5 -1 -3 980.1 50.09
 5 -1 -3 842.52 48
 5 -1 -3 903.51 46
 5 -1 -3 881.31 48.8
 5 -1 -3 838.82 49.3
 5 -1 -3 863.21 50.09
 -4 1 3 655.33 35.4
 -4 1 3 653.63 35.9
 -4 1 3 641.44 35.9
 -4 1 3 663.53 35.5
 -4 1 3 653.23 35.6
 -4 1 3 686.13 35.7
 -4 1 3 619.94 35.8
 -4 1 3 649.93 36.6
 4 -1 -3 645.54 35.6
 4 -1 -3 603.34 35.7
 4 -1 -3 645.14 35.8
 4 -1 -3 605.74 35.1
 4 -1 -3 621.14 33.7
 4 -1 -3 608.34 36.9
 4 -1 -3 665.83 35.3
 4 -1 -3 696.33 37
 4 -1 -3 608.84 35.4
 4 -1 -3 654.93 37
 4 -1 -3 664.53 36.4
 4 -1 -3 647.34 35.7
 4 -1 -3 604.14 35
 4 -1 -3 592.54 35.1
 4 -1 -3 667.93 33.9
 -3 1 3 4391.56 240.88
 -3 1 3 4368.96 240.98
 3 -1 -3 4666.93 240.68
 3 -1 -3 4640.64 240.18
 3 -1 -3 4673.53 241.78
 3 -1 -3 4848.11 241.88
 3 -1 -3 4839.92 241.98
 -2 1 3 2618.24 136.39
 -2 1 3 2554.44 136.99
 -2 1 3 2558.54 136.49
 -2 1 3 2559.74 137.49
 -2 1 3 2525.45 136.79
 2 -1 -3 2602.04 136.29
 2 -1 -3 2842.02 137.79
 2 -1 -3 2829.52 137.79
 2 -1 -3 2534.65 136.49
 2 -1 -3 2662.03 136.49
 2 -1 -3 2604.84 136.59
 0 1 3 415.86 22.9
 0 1 3 439.86 22.1
 0 1 3 387.96 22.6
 0 1 3 404.56 23.1
 0 1 3 437.86 22.7
 0 1 3 405.56 22.6
 0 1 3 451.95 22.7
 0 1 3 407.06 22.5
 0 -1 -3 418.36 23
 0 -1 -3 413.86 22.7
 0 -1 -3 423.76 22.7
 0 -1 -3 452.45 22.7
 0 -1 -3 418.26 22.7
 0 -1 -3 424.16 22.2
 0 -1 -3 441.76 22.5
 0 -1 -3 402.26 22.9
 1 1 3 57.99 4.5
 1 1 3 66.19 4.5
 1 1 3 60.39 4.6
 1 1 3 73.59 4.8
 1 1 3 59.09 4.6
 1 1 3 53.89 5
 1 1 3 56.99 4.3
 -1 -1 -3 70.39 4.5
 -1 -1 -3 62.39 4.8
 -1 -1 -3 56.59 4.8
 -1 -1 -3 45.6 4.6
 -1 -1 -3 65.89 4.7
 -1 -1 -3 54.09 4.6
 -1 -1 -3 59.99 4.8
 -1 -1 -3 66.39 4.5
 -1 -1 -3 59.59 5
 2 1 3 1.1 1.8
 2 1 3 4.3 1.6
 2 1 3 3.4 2.5
 2 1 3 3.5 2.2
 2 1 3 -1.3 1.8
 2 1 3 3.1 2.4
 2 1 3 0.1 0.9
 2 1 3 1 1.5
 2 1 3 3.4 2
 -2 -1 -3 5.5 2.1
 -2 -1 -3 2.9 1.7
 -2 -1 -3 3.2 1.7
 -2 -1 -3 2.3 1.7
 -2 -1 -3 2.4 1.8
 -2 -1 -3 2 2.1
 -2 -1 -3 0.4 2
 -2 -1 -3 2.2 2.4
 -2 -1 -3 1.3 2.6
 -3 -1 -3 5196.48 272.37
 -3 -1 -3 5186.88 272.17
 -3 -1 -3 5299.27 271.77
 4 1 3 2406.46 121.09
 4 1 3 2206.78 120.79
 4 1 3 2211.88 119.59
 4 1 3 2349.06 119.59
 4 1 3 2301.37 119.89
 4 1 3 2113.39 119.89
 4 1 3 2473.35 120.99
 4 1 3 2189.88 119.69
 4 1 3 2476.15 121.79
 4 1 3 2295.57 119.69
 4 1 3 2127.79 120.29
 4 1 3 2302.07 119.99
 4 1 3 2485.85 121.59
 -4 -1 -3 2374.06 122.19
 -4 -1 -3 2299.37 122.09
 -4 -1 -3 2274.57 120.99
 -4 -1 -3 2064.69 121.29
 -4 -1 -3 2093.49 120.79
 -4 -1 -3 2400.56 119.59
 -4 -1 -3 2224.48 121.39
 -4 -1 -3 2455.75 120.09
 5 1 3 37.6 3.8
 5 1 3 36.1 4.9
 5 1 3 32.8 6
 5 1 3 25.7 6.5
 5 1 3 21.4 5.1
 5 1 3 34.7 3.7
 5 1 3 32.5 4.3
 5 1 3 37.4 5.8
 5 1 3 31.2 3.7
 5 1 3 42.1 6.1
 5 1 3 33.6 6.1
 5 1 3 33.2 5
 5 1 3 36.8 4.2
 5 1 3 38.3 4.6
 -5 -1 -3 19.1 5.6
 -5 -1 -3 31.8 3.4
 -5 -1 -3 37 4.4
 -5 -1 -3 35.8 6
 -5 -1 -3 37.3 7.4
 -5 -1 -3 23.9 5.4
 -5 -1 -3 18.9 5
 -5 -1 -3 30 6.6
 6 1 3 1313.67 76.69
 6 1 3 1376.56 74.79
 6 1 3 1418.06 73.79
 6 1 3 1410.26 76.19
 6 1 3 1288.87 75.89
 6 1 3 1385.86 74.39
 6 1 3 1470.25 77.29
 6 1 3 1408.46 76.79
 6 1 3 1446.46 76.19
 6 1 3 1374.16 75.39
 6 1 3 1325.47 76.29
 6 1 3 1346.87 75.49
 6 1 3 1516.25 74.89
 6 1 3 1399.76 73.89
 6 1 3 1426.46 73.99
 -6 -1 -3 1457.95 77.29
 -6 -1 -3 1410.16 77.99
 -6 -1 -3 1304.67 73.29
 -6 -1 -3 1367.66 76.39
 -6 -1 -3 1507.95 78.19
 -6 -1 -3 1444.76 77.49
 -6 -1 -3 1443.96 76.49
 -6 -1 -3 1381.66 73.29
 7 1 3 906.01 48.9
 7 1 3 885.61 50.49
 7 1 3 820.42 50.69
 7 1 3 910.11 51.09
 7 1 3 904.51 48.3
 7 1 3 893.31 51.99
 7 1 3 954.2 52.09
 7 1 3 885.81 50.79
 7 1 3 800.52 51.39
 7 1 3 878.01 53.39
 7 1 3 887.71 50.49
 7 1 3 957.8 49.6
 7 1 3 919.21 48.3
 -7 -1 -3 994.7 52.99
 -7 -1 -3 877.61 47
 -7 -1 -3 955.8 53.29
 -7 -1 -3 957.2 51.69
 -7 -1 -3 912.21 52.29
 -7 -1 -3 868.11 52.79
 -7 -1 -3 896.81 51.49
 -7 -1 -3 879.51 47
 8 1 3 935.31 55.69
 8 1 3 967 53.59
 8 1 3 931.71 57.09
 8 1 3 1023.1 56.59
 8 1 3 990.3 57.49
 8 1 3 1009.8 53.19
 8 1 3 1028.8 54.69
 8 1 3 901.91 55.79
 8 1 3 911.61 52.89
 8 1 3 890.61 55.89
 8 1 3 1047.1 53.19
 8 1 3 981.5 54.79
 8 1 3 955.4 56.89
 8 1 3 987.6 55.69
 8 1 3 980.1 57.19
 -8 -1 -3 1109.49 58.69
 -8 -1 -3 966.7 58.69
 -8 -1 -3 969 56.69
 -8 -1 -3 1119.59 57.59
 -8 -1 -3 1053.69 58.09
 -8 -1 -3 1090.29 59.39
 9 1 3 473.55 30.8
 9 1 3 466.85 27.3
 9 1 3 474.85 27.5
 9 1 3 456.95 31.9
 9 1 3 448.86 30.2
 9 1 3 458.15 30.9
 9 1 3 470.25 28.9
 9 1 3 501.65 29.7
 9 1 3 493.65 32.3
 9 1 3 503.65 27.3
 9 1 3 456.95 32.1
 9 1 3 524.25 29.5
 9 1 3 494.95 32
 -9 -1 -3 487.45 31.7
 -9 -1 -3 513.55 34.1
 -9 -1 -3 573.04 34
 -9 -1 -3 573.64 33.8
 -9 -1 -3 469.35 33.7
 10 1 3 31.2 7.7
 10 1 3 24.5 6.5
 10 1 3 29 5.9
 10 1 3 23.4 3.6
 10 1 3 22.5 5.5
 10 1 3 26.4 4.4
 10 1 3 27.2 4.4
 10 1 3 28 7.1
 10 1 3 25.1 6.9
 -10 -1 -3 18.2 8.6
 -10 -1 -3 18.4 8.7
 -10 -1 -3 21.7 9.5
 -10 -1 -3 17.9 8
 -10 -1 -3 19.7 7.3
 11 1 3 79.39 6.8
 11 1 3 69.79 6.1
 11 1 3 79.69 11
 11 1 3 56.39 10.6
 11 1 3 74.09 9.1
 11 1 3 68.49 6.3
 11 1 3 62.99 9
 11 1 3 72.59 5.6
 -11 -1 -3 63.19 13.3
 -11 -1 -3 64.69 12.6
 -11 -1 -3 86.79 14.8
 -11 -1 -3 53.49 12.3
 12 1 3 84.09 11.9
 12 1 3 54.79 6
 12 1 3 62.49 8.8
 12 1 3 58.59 6.4
 -12 -1 -3 60.69 13
 -12 -1 -3 83.09 15.1
 -12 -1 -3 73.59 14.3
 13 1 3 7.4 2.9
 13 1 3 0.2 4.4
 13 1 3 -3.5 2.4
 -13 -1 -3 -15.4 7.8
 -13 -1 -3 -16.5 6.9
 -13 -1 -3 16.7 10.2
 14 1 3 18.4 3.7
 14 1 3 6.3 6.6
 14 1 3 12.4 5.8
 -14 -1 -3 -6.3 8.8
 -14 -1 -3 11.1 10.3
 15 1 3 1.1 5.3
 15 -1 -4 43.8 9.8
 15 -1 -4 54.69 9.4
 14 -1 -4 131.99 14.8
 13 -1 -4 -7 5
 13 -1 -4 -0.8 5.6
 12 -1 -4 581.24 38.8
 12 -1 -4 651.53 37.9
 11 -1 -4 7.8 1.3
 11 -1 -4 14.5 6.7
 11 -1 -4 4.8 5.4
 -10 1 4 251.87 19.6
 10 -1 -4 222.08 16.7
 10 -1 -4 226.98 19.4
 10 -1 -4 219.68 11.7
 10 -1 -4 212.18 16.9
 10 -1 -4 201.78 20.4
 10 -1 -4 216.78 16.5
 10 -1 -4 205.28 18.3
 10 -1 -4 208.48 19.4
 10 -1 -4 202.08 17.8
 10 -1 -4 224.48 17.7
 -9 1 4 271.57 20.4
 -9 1 4 213.48 19.8
 -9 1 4 231.98 19.4
 9 -1 -4 292.87 19.6
 9 -1 -4 236.48 17.8
 9 -1 -4 243.68 18
 9 -1 -4 226.78 30.2
 9 -1 -4 261.97 18.8
 9 -1 -4 239.18 19.3
 9 -1 -4 276.77 19.5
 9 -1 -4 254.07 18.6
 9 -1 -4 265.17 18.2
 9 -1 -4 252.17 22.5
 9 -1 -4 265.97 18
 9 -1 -4 256.97 22.4
 -8 1 4 -0.7 5.4
 -8 1 4 -1.2 5
 -8 1 4 3.2 5
 -8 1 4 4 5.1
 -8 1 4 0.2 4.9
 8 -1 -4 -2.5 4.3
 8 -1 -4 -1.5 3.3
 8 -1 -4 1.1 5.8
 8 -1 -4 1.2 3.9
 8 -1 -4 -9.4 4.2
 8 -1 -4 -4 3.6
 8 -1 -4 -1 4.4
 8 -1 -4 -4.3 3.7
 8 -1 -4 1.6 4
 8 -1 -4 1.9 3.8
 8 -1 -4 -6.4 4
 8 -1 -4 -2.3 3.9
 8 -1 -4 -7.5 4.8
 -7 1 4 170.68 16.5
 -7 1 4 180.18 14.5
 -7 1 4 199.28 15
 -7 1 4 196.28 14.6
 -7 1 4 197.18 15.4
 -7 1 4 197.38 14.8
 7 -1 -4 211.08 14.5
 7 -1 -4 177.38 16.3
 7 -1 -4 192.98 13.8
 7 -1 -4 174.58 15.7
 7 -1 -4 193.98 16
 7 -1 -4 215.88 13.9
 7 -1 -4 202.08 15.2
 7 -1 -4 192.28 14.6
 7 -1 -4 178.58 14.1
 7 -1 -4 192.38 13.8
 7 -1 -4 174.88 13.5
 7 -1 -4 195.78 10.2
 7 -1 -4 192.78 10.2
 7 -1 -4 176.38 14.2
 7 -1 -4 184.68 16.4
 -6 1 4 135.49 11.2
 -6 1 4 115.49 10.3
 -6 1 4 118.99 10.8
 -6 1 4 127.79 10.8
 -6 1 4 137.29 12.1
 -6 1 4 123.99 11.2
 -6 1 4 137.99 11.5
 6 -1 -4 115.09 10.2
 6 -1 -4 127.49 9.8
 6 -1 -4 126.49 7.4
 6 -1 -4 120.39 10.8
 6 -1 -4 120.59 10.5
 6 -1 -4 129.89 12.5
 6 -1 -4 126.69 9.9
 6 -1 -4 128.19 10
 6 -1 -4 127.19 10
 6 -1 -4 128.09 12.7
 6 -1 -4 130.79 12
 6 -1 -4 131.89 7.5
 6 -1 -4 124.59 11.8
 6 -1 -4 117.39 10.2
 -5 1 4 226.58 15.4
 -5 1 4 219.88 15.1
 -5 1 4 241.78 14.8
 -5 1 4 225.98 14.8
 -5 1 4 216.28 15.9
 -5 1 4 224.88 14.5
 -5 1 4 203.08 14.6
 -5 1 4 205.88 15
 5 -1 -4 227.68 15
 5 -1 -4 199.88 13.9
 5 -1 -4 234.48 12
 5 -1 -4 201.28 14.1
 5 -1 -4 216.58 14.6
 5 -1 -4 205.48 14.4
 5 -1 -4 213.18 16.1
 5 -1 -4 241.78 12.6
 5 -1 -4 250.87 14.9
 5 -1 -4 197.68 13.9
 5 -1 -4 230.48 14.1
 5 -1 -4 213.38 15.5
 5 -1 -4 230.28 11.8
 5 -1 -4 220.48 12.5
 5 -1 -4 208.98 15
 5 -1 -4 225.48 21.8
 -4 1 4 34.5 5.5
 -4 1 4 37.2 6.1
 -4 1 4 45.7 3.1
 -4 1 4 43.5 3.2
 -4 1 4 38.8 5.5
 -4 1 4 44.7 5.7
 -4 1 4 44.7 5
 -4 1 4 45.9 5.6
 -4 1 4 45.5 6
 4 -1 -4 61.19 7.5
 4 -1 -4 42.3 6.9
 4 -1 -4 45.4 3.1
 4 -1 -4 48 6.9
 4 -1 -4 40.3 5
 4 -1 -4 43.9 6
 4 -1 -4 45.7 5.6
 4 -1 -4 50.69 6.1
 4 -1 -4 45.4 4.9
 4 -1 -4 44.3 3.1
 4 -1 -4 44.1 5.4
 4 -1 -4 54.29 5
 4 -1 -4 44.9 3.7
 4 -1 -4 48.6 5.2
 4 -1 -4 43.8 3.9
 4 -1 -4 45.4 4.9
 4 -1 -4 49.4 5.3
 -3 1 4 1500.95 83.39
 -3 1 4 1689.03 82.59
 -3 1 4 1586.74 82.19
 -3 1 4 1544.75 82.29
 -3 1 4 1544.75 82.49
 -3 1 4 1458.05 82.59
 -3 1 4 1504.45 81.99
 -3 1 4 1635.54 81.49
 3 -1 -4 1586.74 82.19
 3 -1 -4 1633.34 83.79
 3 -1 -4 1630.44 82.59
 3 -1 -4 1656.93 82.99
 3 -1 -4 1614.04 82.29
 3 -1 -4 1580.84 81.19
 3 -1 -4 1527.55 82.69
 3 -1 -4 1522.05 81.79
 3 -1 -4 1508.05 81.19
 3 -1 -4 1641.44 83.79
 3 -1 -4 1509.95 81.79
 3 -1 -4 1462.95 82.19
 3 -1 -4 1613.94 82.19
 3 -1 -4 1366.96 81.99
 3 -1 -4 1578.64 81.69
 -1 1 4 197.78 12.5
 -1 1 4 203.68 12.1
 -1 1 4 208.58 12.6
 -1 1 4 219.18 12.1
 -1 1 4 192.68 11
 -1 1 4 220.38 12
 -1 1 4 230.78 11.8
 -1 1 4 190.18 11.7
 1 -1 -4 198.28 11.8
 1 -1 -4 195.58 12.4
 1 -1 -4 199.78 12.1
 1 -1 -4 203.38 11.8
 1 -1 -4 223.08 12.2
 1 -1 -4 210.88 12.8
 1 -1 -4 202.08 11.9
 1 1 4 883.21 42
 1 1 4 787.52 42.6
 1 1 4 811.12 42.2
 1 1 4 792.52 42.2
 1 1 4 879.01 41.8
 1 1 4 786.42 42.1
 1 1 4 768.02 41.7
 -1 -1 -4 723.23 42
 -1 -1 -4 856.91 42.2
 -1 -1 -4 828.32 42.6
 -1 -1 -4 708.33 42.1
 -1 -1 -4 779.62 42
 -1 -1 -4 830.82 41.8
 -1 -1 -4 741.73 42.2
 -1 -1 -4 707.43 41.1
 -1 -1 -4 745.53 42.2
 3 1 4 92.99 7.4
 3 1 4 113.69 7.7
 3 1 4 95.69 6.8
 3 1 4 88.39 6.9
 3 1 4 106.99 8.2
 3 1 4 101.69 7.6
 3 1 4 101.19 6.7
 3 1 4 99.39 8
 3 1 4 91.89 6.1
 -3 -1 -4 104.29 8.2
 -3 -1 -4 97.29 7.8
 -3 -1 -4 99.89 6.6
 -3 -1 -4 106.89 7.1
 -3 -1 -4 100.99 8.4
 -3 -1 -4 115.69 7.4
 -3 -1 -4 95.79 7.1
 -3 -1 -4 85.99 7.5
 -3 -1 -4 104.29 6.9
 4 1 4 32.1 4
 4 1 4 26.4 3.5
 4 1 4 31 3.8
 4 1 4 29.7 3.9
 4 1 4 31.6 3.8
 4 1 4 31.6 5.7
 4 1 4 36 5.6
 4 1 4 29 4.4
 4 1 4 37.1 5.3
 4 1 4 51.89 6.4
 4 1 4 32.6 4
 -4 -1 -4 38.8 4.3
 -4 -1 -4 29.3 5.5
 -4 -1 -4 33.3 4.1
 -4 -1 -4 28 5.6
 -4 -1 -4 30.9 3.4
 -4 -1 -4 32.2 5.4
 -4 -1 -4 18.9 4.8
 -4 -1 -4 32.1 3.3
 -4 -1 -4 33.8 4
 -4 -1 -4 39.2 6.6
 -4 -1 -4 28.9 6.3
 5 1 4 203.48 12.6
 5 1 4 220.08 12.7
 5 1 4 214.68 14.8
 5 1 4 220.28 14.3
 5 1 4 194.18 12.4
 5 1 4 203.48 13.4
 5 1 4 186.28 14
 5 1 4 200.68 12.4
 5 1 4 209.48 12.9
 5 1 4 214.58 14.1
 5 1 4 220.08 15
 5 1 4 186.68 12.9
 5 1 4 188.98 12.4
 -5 -1 -4 171.98 13.9
 -5 -1 -4 213.08 12.8
 -5 -1 -4 222.78 16.3
 -5 -1 -4 204.78 12.3
 -5 -1 -4 204.58 14.4
 -5 -1 -4 199.38 12.3
 -5 -1 -4 197.98 14.9
 -5 -1 -4 175.08 14.9
 -5 -1 -4 207.88 15.8
 6 1 4 242.78 14.7
 6 1 4 247.28 17.5
 6 1 4 209.88 16.5
 6 1 4 239.78 15
 6 1 4 249.97 15.1
 6 1 4 246.28 15.3
 6 1 4 227.38 15.4
 6 1 4 234.48 16.5
 6 1 4 241.68 15.9
 6 1 4 236.68 14.6
 6 1 4 206.18 16.9
 6 1 4 246.48 17.3
 6 1 4 254.47 14.6
 6 1 4 259.37 16.9
 -6 -1 -4 261.77 17.8
 -6 -1 -4 217.48 16.7
 -6 -1 -4 241.38 14.1
 -6 -1 -4 257.97 18.9
 -6 -1 -4 249.38 18.9
 -6 -1 -4 239.18 17
 -6 -1 -4 239.38 15
 -6 -1 -4 238.98 17.9
 7 1 4 116.19 8.4
 7 1 4 118.99 9.2
 7 1 4 96.39 9.6
 7 1 4 114.69 10.8
 7 1 4 104.99 10
 7 1 4 110.49 10.7
 7 1 4 112.09 11.3
 7 1 4 114.09 8.3
 7 1 4 117.69 9.2
 7 1 4 109.49 9
 7 1 4 108.29 8.3
 7 1 4 129.89 11
 7 1 4 148.59 12.3
 7 1 4 107.69 11.4
 -7 -1 -4 107.39 7.5
 -7 -1 -4 111.29 11.5
 -7 -1 -4 118.39 12.7
 -7 -1 -4 114.99 7.4
 -7 -1 -4 141.99 13
 -7 -1 -4 124.59 13.6
 -7 -1 -4 98.69 11.1
 8 1 4 4487.75 223.68
 8 1 4 4331.67 224.38
 8 1 4 4481.65 223.68
 8 1 4 4130.69 226.48
 8 1 4 4377.66 224.28
 8 1 4 4148.38 224.58
 8 1 4 4010.1 226.98
 8 1 4 4449.55 228.18
 8 1 4 4330.27 225.88
 8 1 4 4360.86 227.18
 8 1 4 3930.81 227.18
 8 1 4 4208.98 223.48
 -8 -1 -4 4593.54 228.38
 -8 -1 -4 4388.86 229.08
 -8 -1 -4 4280.67 226.88
 -8 -1 -4 4097.89 221.58
 -8 -1 -4 4134.79 221.58
 -8 -1 -4 4556.54 228.58
 -8 -1 -4 4242.08 228.98
 9 1 4 1096.69 61.19
 9 1 4 967 57.89
 9 1 4 1116.59 56.79
 9 1 4 1022.9 59.19
 9 1 4 1021 59.19
 9 1 4 1064.99 56.59
 9 1 4 990 60.99
 9 1 4 997.5 64.09
 9 1 4 1064.09 57.79
 9 1 4 1062.99 57.29
 -9 -1 -4 1085.79 63.29
 -9 -1 -4 1120.19 62.39
 -9 -1 -4 1109.89 62.09
 -9 -1 -4 1009.8 62.59
 -9 -1 -4 991.7 60.09
 10 1 4 21.9 4.6
 10 1 4 28.9 4.2
 10 1 4 27.5 6.4
 10 1 4 23.1 4
 10 1 4 20 5.1
 10 1 4 15.7 7
 10 1 4 32.2 7.5
 10 1 4 37.6 6.7
 10 1 4 32.5 7.3
 10 1 4 23.6 4.3
 -10 -1 -4 24.9 9.9
 -10 -1 -4 21.8 9.1
 -10 -1 -4 17.7 7.6
 -10 -1 -4 16.5 8.9
 -10 -1 -4 24.7 9.3
 11 1 4 162.38 10.3
 11 1 4 142.79 12.3
 11 1 4 139.69 10.8
 11 1 4 146.29 10.5
 11 1 4 171.28 12.9
 11 1 4 143.99 10.8
 11 1 4 134.79 13.7
 11 1 4 86.49 16.1
 -11 -1 -4 146.59 15.4
 -11 -1 -4 149.19 19
 -11 -1 -4 167.38 17.9
 -11 -1 -4 181.78 20.7
 -11 -1 -4 149.29 18.7
 12 1 4 11.3 3.6
 12 1 4 10.3 4.9
 12 1 4 19.9 8.3
 12 1 4 14.8 4
 12 1 4 17 2.8
 12 1 4 18.7 3.4
 12 1 4 10.8 5
 -12 -1 -4 19.4 9.5
 -12 -1 -4 15.9 10.5
 -12 -1 -4 10.9 9.7
 13 1 4 39.2 5.1
 13 1 4 28.1 5
 13 1 4 20.6 6
 -13 -1 -4 55.89 13.5
 -13 -1 -4 19.2 10.9
 -13 -1 -4 36.7 12.7
 14 1 4 1.9 4.7
 14 1 4 9.3 3.6
 14 1 4 3.9 6.1
 -14 -1 -4 12.5 9.9
 -14 -1 -4 3.8 9.7
 15 1 4 17.5 7
 15 1 4 3.9 4.6
 15 -1 -5 54.29 8.7
 15 -1 -5 61.29 11.5
 14 -1 -5 39.6 9.6
 14 -1 -5 35 8
 13 -1 -5 298.87 21.1
 13 -1 -5 280.07 23.1
 12 -1 -5 86.39 5.6
 12 -1 -5 88.09 5.3
 12 -1 -5 87.19 11.9
 12 -1 -5 95.89 11.2
 11 -1 -5 91.49 5.6
 11 -1 -5 104.39 10.7
 11 -1 -5 84.49 6.3
 11 -1 -5 94.79 12.3
 -10 1 5 312.97 23
 -10 1 5 279.07 23.4
 10 -1 -5 286.37 20.9
 10 -1 -5 279.27 22.2
 10 -1 -5 312.27 21
 10 -1 -5 312.87 22.3
 10 -1 -5 319.97 22.3
 10 -1 -5 288.97 16.2
 10 -1 -5 307.17 16.5
 10 -1 -5 314.27 20.7
 -9 1 5 319.47 21.9
 -9 1 5 310.07 22.4
 -9 1 5 322.07 23.2
 -9 1 5 302.97 22.2
 -9 1 5 281.37 22.8
 9 -1 -5 298.97 23.4
 9 -1 -5 332.87 22
 9 -1 -5 292.57 20.6
 9 -1 -5 307.17 21.8
 9 -1 -5 288.87 21.1
 9 -1 -5 325.17 22.3
 9 -1 -5 300.27 16.4
 9 -1 -5 322.87 20.4
 9 -1 -5 289.07 21.8
 9 -1 -5 291.57 26
 9 -1 -5 297.47 20.6
 9 -1 -5 309.77 24.4
 9 -1 -5 318.37 21.7
 9 -1 -5 280.37 20.4
 9 -1 -5 305.67 16.5
 9 -1 -5 297.97 24.6
 -8 1 5 310.97 23.6
 -8 1 5 328.97 23
 -8 1 5 369.56 24.3
 -8 1 5 345.37 23
 -8 1 5 325.07 23.4
 -8 1 5 317.27 22.9
 8 -1 -5 311.97 24.5
 8 -1 -5 349.96 23.5
 8 -1 -5 327.57 25.5
 8 -1 -5 337.07 22
 8 -1 -5 385.36 22
 8 -1 -5 343.27 18.3
 8 -1 -5 350.36 18.4
 8 -1 -5 332.97 24.2
 8 -1 -5 350.36 22.2
 8 -1 -5 365.06 22.1
 8 -1 -5 349.77 23
 8 -1 -5 330.87 25.5
 8 -1 -5 343.47 23
 8 -1 -5 335.17 22.5
 8 -1 -5 330.47 22.4
 -7 1 5 30.7 7.1
 -7 1 5 31 6.4
 -7 1 5 25.1 6.5
 -7 1 5 37.3 6.5
 -7 1 5 33.2 7.6
 7 -1 -5 28.8 5.8
 7 -1 -5 25.7 5.2
 7 -1 -5 36.3 7.5
 7 -1 -5 26.5 7.7
 7 -1 -5 25.7 2.4
 7 -1 -5 28.7 2.8
 7 -1 -5 32.2 7.9
 7 -1 -5 32.3 5.3
 7 -1 -5 25.5 5.2
 7 -1 -5 27.9 6.2
 7 -1 -5 28.4 5.6
 7 -1 -5 26 6.2
 7 -1 -5 30.8 5.9
 7 -1 -5 27.1 7.8
 7 -1 -5 28.6 6.4
 7 -1 -5 23.2 2.4
 7 -1 -5 30.3 2.8
 -6 1 5 580.94 35.2
 -6 1 5 562.94 34.5
 -6 1 5 589.34 35.2
 -6 1 5 642.34 34.8
 -6 1 5 584.84 34.2
 6 -1 -5 612.64 32
 6 -1 -5 598.14 34.4
 6 -1 -5 559.84 36.5
 6 -1 -5 551.94 36.2
 6 -1 -5 607.34 33.7
 6 -1 -5 590.24 34.6
 6 -1 -5 624.14 34.7
 6 -1 -5 606.84 34
 6 -1 -5 576.54 36.2
 6 -1 -5 573.84 33.6
 6 -1 -5 610.34 31.5
 6 -1 -5 573.44 36.2
 6 -1 -5 601.64 35.1
 6 -1 -5 561.54 35.4
 6 -1 -5 597.64 34.9
 6 -1 -5 611.74 32
 6 -1 -5 620.94 31.5
 -5 1 5 2502.55 131.39
 -5 1 5 2525.55 132.29
 -5 1 5 2373.46 131.19
 -5 1 5 2419.06 130.79
 -5 1 5 2420.36 131.19
 -5 1 5 2500.85 130.69
 -5 1 5 2546.35 130.49
 5 -1 -5 2614.54 128.49
 5 -1 -5 2482.85 130.09
 5 -1 -5 2326.67 131.39
 5 -1 -5 2439.96 132.49
 5 -1 -5 2447.16 131.19
 5 -1 -5 2414.76 132.59
 5 -1 -5 2495.55 130.09
 5 -1 -5 2419.76 128.99
 5 -1 -5 2508.35 130.79
 5 -1 -5 2580.04 132.79
 5 -1 -5 2387.06 130.79
 5 -1 -5 2451.75 128.49
 5 -1 -5 2501.25 131.89
 5 -1 -5 2381.46 129.99
 5 -1 -5 2525.15 130.69
 5 -1 -5 2567.94 129.19
 5 -1 -5 2538.45 130.49
 -4 1 5 16.4 4.2
 -4 1 5 9 3.7
 -4 1 5 18 3.9
 -4 1 5 16.5 3.4
 -4 1 5 11.3 4.5
 -4 1 5 14.6 2.1
 -4 1 5 17.3 4
 -4 1 5 18 3.8
 -4 1 5 13.5 4
 -4 1 5 16.1 2.4
 4 -1 -5 14.4 3.3
 4 -1 -5 24 4
 4 -1 -5 12.8 3
 4 -1 -5 15 3.6
 4 -1 -5 17.6 2.2
 4 -1 -5 15.9 3.7
 4 -1 -5 18.3 5.4
 4 -1 -5 15.8 2.1
 4 -1 -5 19.8 2.9
 4 -1 -5 13.1 2.4
 4 -1 -5 14.8 3.4
 4 -1 -5 18.3 4.4
 4 -1 -5 10.9 3.9
 4 -1 -5 18.4 5.2
 4 -1 -5 13.8 3.5
 4 -1 -5 6.6 4.2
 -3 1 5 4509.75 245.38
 -3 1 5 4529.55 246.28
 -3 1 5 4787.72 245.78
 3 -1 -5 4830.42 244.68
 3 -1 -5 5314.37 246.88
 3 -1 -5 4424.56 244.28
 3 -1 -5 4666.23 244.68
 3 -1 -5 4801.72 244.88
 3 -1 -5 4409.46 244.78
 3 -1 -5 5085.19 246.68
 3 -1 -5 4516.35 244.08
 -2 1 5 782.12 39.7
 -2 1 5 727.03 39.5
 -2 1 5 802.72 39.6
 -2 1 5 777.32 38.9
 -2 1 5 685.33 38.9
 -2 1 5 695.23 38.8
 -2 1 5 701.93 40
 -2 1 5 677.13 39.6
 -2 1 5 732.53 39.9
 -2 1 5 767.22 39.7
 -2 1 5 684.03 40.4
 2 -1 -5 762.32 39.6
 2 -1 -5 757.92 39.3
 2 -1 -5 793.52 40.9
 2 -1 -5 712.43 39.6
 2 -1 -5 701.53 39.2
 2 -1 -5 728.83 39.8
 2 -1 -5 798.02 40.1
 2 -1 -5 705.93 38.8
 -1 1 5 1150.38 60.29
 -1 1 5 1192.28 59.99
 -1 1 5 1240.78 59.89
 -1 1 5 1145.29 59.49
 -1 1 5 1050.59 59.49
 -1 1 5 1144.89 59.89
 -1 1 5 1090.29 60.29
 1 -1 -5 1116.69 59.79
 1 -1 -5 1126.79 59.79
 1 -1 -5 1138.89 59.69
 1 -1 -5 1131.49 60.39
 1 -1 -5 1103.49 60.29
 1 -1 -5 1032.7 59.89
 1 -1 -5 1157.18 59.89
 0 1 5 1489.25 83.99
 0 1 5 1712.23 84.19
 0 1 5 1704.83 84.19
 0 1 5 1592.74 83.89
 0 1 5 1568.64 84.79
 0 1 5 1585.04 83.69
 0 -1 -5 1676.63 84.09
 0 -1 -5 1699.43 83.79
 0 -1 -5 1686.43 84.29
 0 -1 -5 1525.75 84.39
 0 -1 -5 1550.54 83.29
 0 -1 -5 1568.24 84.69
 0 -1 -5 1551.44 84.29
 0 -1 -5 1522.15 84.19
 1 1 5 11.1 2.2
 1 1 5 6 2.3
 1 1 5 10.4 2
 1 1 5 9.2 2.4
 1 1 5 9.1 1.5
 1 1 5 7.4 2.9
 1 1 5 9.2 2.3
 -1 -1 -5 10.6 2.3
 -1 -1 -5 5.4 2.3
 -1 -1 -5 10.2 2.8
 -1 -1 -5 11 2.9
 -1 -1 -5 11.4 2.7
 -1 -1 -5 8.9 2.3
 -1 -1 -5 12.8 2.6
 -1 -1 -5 13.9 2.4
 -1 -1 -5 9.6 1.6
 2 1 5 -0.3 1.7
 2 1 5 1.7 2.4
 2 1 5 1.2 1.9
 2 1 5 -0.1 1.7
 2 1 5 0.5 1.3
 2 1 5 15.4 3
 -2 -1 -5 1.2 2.1
 -2 -1 -5 2.5 2.3
 -2 -1 -5 0.9 2.1
 -2 -1 -5 3.9 2.8
 -2 -1 -5 2 1.6
 -2 -1 -5 1.3 1.8
 -2 -1 -5 3.6 2.3
 3 1 5 5375.66 282.67
 3 1 5 5489.05 282.17
 -3 -1 -5 5676.73 282.67
 -3 -1 -5 5417.86 282.87
 -3 -1 -5 5192.88 282.97
 4 1 5 791.62 43.5
 4 1 5 884.41 45.6
 4 1 5 790.82 44.5
 4 1 5 868.51 45.4
 4 1 5 789.22 45.8
 4 1 5 754.52 44.9
 4 1 5 784.42 45.6
 4 1 5 794.92 43.6
 4 1 5 851.21 44.1
 4 1 5 766.92 44.4
 4 1 5 848.02 44.4
 -4 -1 -5 769.02 46
 -4 -1 -5 849.41 44.7
 -4 -1 -5 866.11 44.3
 -4 -1 -5 819.72 46.9
 -4 -1 -5 788.62 45.9
 -4 -1 -5 852.11 44.7
 -4 -1 -5 865.41 43.9
 -4 -1 -5 859.11 45.7
 -4 -1 -5 860.31 44.2
 -4 -1 -5 768.52 45.3
 5 1 5 1.6 2.6
 5 1 5 -2.4 2.6
 5 1 5 -0.6 3.5
 5 1 5 -0.4 2.2
 5 1 5 -1.1 2
 5 1 5 1.6 2
 5 1 5 3.5 2.2
 5 1 5 0.4 2.2
 5 1 5 -0.2 2
 5 1 5 1 3.3
 5 1 5 2.8 3.7
 5 1 5 1.3 3
 -5 -1 -5 1.4 2
 -5 -1 -5 5 5
 -5 -1 -5 0.6 2.2
 -5 -1 -5 -3.4 4.1
 -5 -1 -5 3.6 2.2
 -5 -1 -5 3.4 1.7
 -5 -1 -5 4.8 3.7
 -5 -1 -5 -1.1 4.2
 -5 -1 -5 -1 1.3
 -5 -1 -5 4.9 4.9
 6 1 5 3.4 2.6
 6 1 5 4.5 3.5
 6 1 5 4.3 4.4
 6 1 5 0.8 2.4
 6 1 5 8.4 4.2
 6 1 5 5.6 2.6
 6 1 5 8.6 4.3
 6 1 5 6.8 4.6
 6 1 5 8 3
 6 1 5 3.1 3.5
 6 1 5 13.5 3.2
 6 1 5 5.3 4.5
 6 1 5 0.9 2.8
 -6 -1 -5 14.8 5.2
 -6 -1 -5 8.4 5.7
 -6 -1 -5 4.9 2.5
 -6 -1 -5 7.4 2.6
 7 1 5 97.79 10.1
 7 1 5 97.69 8.3
 7 1 5 104.09 10.4
 7 1 5 103.59 10.1
 7 1 5 109.49 8.6
 7 1 5 94.49 9.2
 7 1 5 106.09 9.9
 7 1 5 102.89 8.4
 7 1 5 99.29 11.4
 7 1 5 91.89 8.3
 7 1 5 100.39 11.1
 7 1 5 104.99 9.2
 7 1 5 112.79 11.7
 7 1 5 111.39 8.7
 -7 -1 -5 109.49 13.6
 -7 -1 -5 106.79 11.3
 -7 -1 -5 117.59 14.2
 -7 -1 -5 122.89 12.6
 -7 -1 -5 117.29 12.8
 -7 -1 -5 99.09 7.5
 -7 -1 -5 111.89 8.6
 8 1 5 99.19 11.1
 8 1 5 95.59 8.4
 8 1 5 108.79 9.1
 8 1 5 104.89 9.7
 8 1 5 67.79 9.8
 8 1 5 91.79 11.6
 8 1 5 103.99 11.7
 8 1 5 106.29 8.7
 8 1 5 99.69 10
 8 1 5 104.39 9.1
 -8 -1 -5 117.29 15.4
 -8 -1 -5 80.29 6.8
 -8 -1 -5 99.89 15.2
 -8 -1 -5 131.09 14.2
 -8 -1 -5 134.09 13.7
 -8 -1 -5 101.49 7
 -8 -1 -5 113.29 12.9
 9 1 5 101.19 12.4
 9 1 5 97.69 9.4
 9 1 5 97.39 10.4
 9 1 5 106.39 8.6
 9 1 5 98.39 8.6
 9 1 5 112.99 9.6
 9 1 5 104.49 10.6
 9 1 5 101.29 9.7
 9 1 5 97.09 14.3
 9 1 5 105.09 8.8
 -9 -1 -5 104.49 15.6
 -9 -1 -5 103.69 15
 -9 -1 -5 100.79 12.7
 -9 -1 -5 122.69 14.9
 -9 -1 -5 136.29 14.8
 10 1 5 33.9 6
 10 1 5 52.19 7.3
 10 1 5 51.39 6.3
 10 1 5 52.79 10.8
 10 1 5 66.69 9.2
 10 1 5 48.7 8
 10 1 5 50.99 6.1
 10 1 5 56.19 7
 10 1 5 43.3 5.7
 -10 -1 -5 40.3 11.4
 -10 -1 -5 46.8 11.1
 -10 -1 -5 44.1 12.2
 -10 -1 -5 26.4 8.6
 -10 -1 -5 57.09 12.1
 11 1 5 13 4.3
 11 1 5 0.4 3.3
 11 1 5 4.6 4.8
 11 1 5 7 3.2
 11 1 5 14.6 4.7
 11 1 5 10 3.4
 -11 -1 -5 16.9 10
 -11 -1 -5 2.7 6.5
 -11 -1 -5 5.8 9.7
 -11 -1 -5 -0.3 7.4
 -11 -1 -5 3.4 8.1
 12 1 5 7.5 3.6
 12 1 5 8.2 3.6
 12 1 5 14.7 5.5
 12 1 5 5.4 3.3
 12 1 5 7.5 4.5
 12 1 5 -2.1 5.5
 12 1 5 13.6 3.3
 -12 -1 -5 4.9 9.4
 -12 -1 -5 -5.5 7.2
 -12 -1 -5 7.3 8.4
 13 1 5 68.79 8.7
 13 1 5 64.99 11.4
 13 1 5 67.69 9.7
 13 1 5 90.09 5.9
 13 1 5 78.69 8
 -13 -1 -5 107.49 17.5
 -13 -1 -5 80.39 16.1
 -13 -1 -5 64.19 15.5
 14 1 5 7.2 4.7
 -14 -1 -5 17.4 10.6
 -14 -1 -5 8.7 10
 15 1 5 7 6.3
 -15 -1 -5 -3.9 10.8
 -15 -1 -5 -9.3 9.6
 15 -1 -6 106.99 15
 14 -1 -6 253.67 19.4
 14 -1 -6 273.27 22.7
 13 -1 -6 116.79 12.1
 13 -1 -6 94.09 13.8
 12 -1 -6 110.69 14.4
 12 -1 -6 114.09 7
 12 -1 -6 112.59 7.6
 12 -1 -6 119.89 12.1
 -11 1 6 38.1 10.2
 -11 1 6 61.09 12.2
 11 -1 -6 47.7 8.1
 11 -1 -6 57.49 10
 11 -1 -6 50.49 3.9
 11 -1 -6 48.6 4.5
 -10 1 6 26.4 8.6
 -10 1 6 27.3 9
 -10 1 6 28.6 8.4
 -10 1 6 37.4 8.6
 10 -1 -6 23 6.6
 10 -1 -6 43 7.3
 10 -1 -6 22.1 3.2
 10 -1 -6 35.2 8.6
 10 -1 -6 34.7 7.3
 10 -1 -6 42 7
 10 -1 -6 26.5 7.6
 10 -1 -6 21.8 2.8
 -9 1 6 568.74 33.8
 -9 1 6 485.75 33.7
 -9 1 6 544.35 34.9
 -9 1 6 529.55 34
 -9 1 6 486.25 34.6
 9 -1 -6 497.15 37.4
 9 -1 -6 521.75 33.3
 9 -1 -6 545.85 37.1
 9 -1 -6 553.24 33.9
 9 -1 -6 540.65 28.8
 9 -1 -6 569.04 33.5
 9 -1 -6 491.85 32.2
 9 -1 -6 552.14 29
 9 -1 -6 536.55 34.1
 9 -1 -6 574.74 33.8
 9 -1 -6 544.65 34.1
 9 -1 -6 536.75 37
 9 -1 -6 555.64 36.4
 -8 1 6 91.89 12
 -8 1 6 97.89 12.3
 -8 1 6 96.39 10.3
 -8 1 6 105.19 12.1
 -8 1 6 83.89 12.2
 -8 1 6 75.09 10.9
 8 -1 -6 75.19 12.4
 8 -1 -6 99.39 12.5
 8 -1 -6 87.99 12.7
 8 -1 -6 92.39 10.1
 8 -1 -6 99.59 9.2
 8 -1 -6 92.29 6.1
 8 -1 -6 92.09 6
 8 -1 -6 93.39 13.7
 8 -1 -6 92.29 6.3
 8 -1 -6 90.49 9.5
 8 -1 -6 94.09 11.2
 8 -1 -6 102.39 10
 8 -1 -6 94.09 6
 8 -1 -6 107.79 12.1
 8 -1 -6 84.99 9.1
 -7 1 6 160.78 14
 -7 1 6 187.78 14.9
 -7 1 6 167.88 14
 -7 1 6 148.69 14.5
 -7 1 6 157.58 14.8
 -7 1 6 175.28 13.5
 7 -1 -6 179.18 13.5
 7 -1 -6 193.18 13
 7 -1 -6 178.78 10.4
 7 -1 -6 179.58 10.8
 7 -1 -6 188.28 10.9
 7 -1 -6 198.28 16.7
 7 -1 -6 186.88 16.4
 7 -1 -6 181.08 13.6
 7 -1 -6 176.58 14.2
 7 -1 -6 197.28 13.4
 7 -1 -6 167.98 15.7
 7 -1 -6 189.28 10.6
 7 -1 -6 189.68 13.1
 7 -1 -6 176.28 14.4
 7 -1 -6 168.88 15
 7 -1 -6 170.48 13.8
 -6 1 6 176.18 14.2
 -6 1 6 190.48 14.2
 -6 1 6 160.68 13.9
 -6 1 6 179.28 12.9
 -6 1 6 166.48 13.1
 -6 1 6 169.38 13.5
 6 -1 -6 185.08 10.6
 6 -1 -6 176.88 10.5
 6 -1 -6 171.08 14.2
 6 -1 -6 174.68 13.6
 6 -1 -6 190.18 12.5
 6 -1 -6 186.58 12.7
 6 -1 -6 145.79 14.6
 6 -1 -6 184.08 13
 6 -1 -6 175.58 15.1
 6 -1 -6 173.58 13
 6 -1 -6 201.68 13.4
 6 -1 -6 178.68 11.1
 6 -1 -6 162.98 15.4
 6 -1 -6 195.08 11.2
 -5 1 6 349.37 22.8
 -5 1 6 359.36 21.7
 -5 1 6 366.16 22.1
 -5 1 6 366.36 22.8
 -5 1 6 357.56 23.7
 -5 1 6 352.26 22.4
 -5 1 6 356.06 20.1
 -5 1 6 333.17 22.6
 -5 1 6 363.66 19.8
 5 -1 -6 370.06 22.2
 5 -1 -6 379.06 24.2
 5 -1 -6 351.76 20.7
 5 -1 -6 366.06 21.9
 5 -1 -6 386.86 24.4
 5 -1 -6 350.06 23.8
 5 -1 -6 347.17 23
 5 -1 -6 389.36 22.1
 5 -1 -6 362.06 20.1
 5 -1 -6 382.46 20.2
 5 -1 -6 382.86 21.8
 5 -1 -6 374.16 21.5
 5 -1 -6 364.56 22.7
 5 -1 -6 386.56 20.9
 5 -1 -6 360.96 21.2
 5 -1 -6 359.36 22.2
 -4 1 6 -0.4 1.6
 -4 1 6 5 3
 -4 1 6 5.1 3.2
 -4 1 6 2.7 2.8
 -4 1 6 -1.9 3.2
 -4 1 6 2.1 3.2
 -4 1 6 0.1 3.4
 -4 1 6 -1 2.3
 -4 1 6 -3 3.6
 4 -1 -6 1.1 1.7
 4 -1 -6 5.5 2.5
 4 -1 -6 2.9 3.1
 4 -1 -6 0.2 4.2
 4 -1 -6 0.6 2
 4 -1 -6 2.7 2.7
 4 -1 -6 -0.2 2.1
 4 -1 -6 4.3 2.9
 4 -1 -6 -2.1 2.6
 4 -1 -6 -0.4 1.8
 4 -1 -6 6 3.3
 4 -1 -6 0.2 2.1
 4 -1 -6 10 3
 -3 1 6 2171.48 113.09
 -3 1 6 1898.91 113.89
 -3 1 6 1993.7 113.49
 -3 1 6 2277.27 112.69
 -3 1 6 2203.38 113.19
 -3 1 6 2097.69 113.29
 -3 1 6 2131.29 112.19
 -3 1 6 2241.58 111.49
 -3 1 6 2128.69 111.59
 -3 1 6 2224.58 112.99
 -3 1 6 2223.18 112.49
 -3 1 6 2286.77 113.09
 3 -1 -6 2305.17 114.69
 3 -1 -6 2195.28 112.79
 3 -1 -6 2081.79 112.69
 3 -1 -6 1995.4 112.19
 3 -1 -6 2276.87 112.89
 3 -1 -6 2130.09 112.99
 3 -1 -6 2027.8 112.19
 3 -1 -6 2071.49 112.29
 3 -1 -6 2019.4 112.39
 3 -1 -6 2284.87 113.69
 -2 1 6 94.89 6.5
 -2 1 6 81.49 6.4
 -2 1 6 80.99 6.2
 -2 1 6 78.79 7.2
 -2 1 6 88.69 6.4
 -2 1 6 80.69 5.3
 -2 1 6 88.79 7.1
 -2 1 6 77.99 6.8
 -2 1 6 84.49 5.7
 -2 1 6 78.89 5.7
 2 -1 -6 89.49 6.4
 2 -1 -6 75.69 6.7
 2 -1 -6 89.69 6.4
 2 -1 -6 80.69 5.2
 2 -1 -6 71.59 5.9
 2 -1 -6 80.79 7.5
 2 -1 -6 89.89 6.9
 2 -1 -6 77.59 6.5
 -1 1 6 1288.37 72.69
 -1 1 6 1461.55 72.49
 -1 1 6 1308.07 71.79
 -1 1 6 1427.76 71.89
 -1 1 6 1370.16 72.09
 -1 1 6 1489.55 72.19
 -1 1 6 1334.17 72.39
 1 -1 -6 1346.97 72.19
 1 -1 -6 1393.26 72.69
 1 -1 -6 1423.86 72.09
 1 -1 -6 1318.27 71.99
 1 -1 -6 1335.07 72.69
 1 -1 -6 1278.97 72.29
 1 -1 -6 1314.07 71.99
 0 1 6 754.12 38.3
 0 1 6 758.82 38.3
 0 1 6 684.83 39
 0 1 6 668.13 37.6
 0 -1 -6 722.03 37.7
 0 -1 -6 690.73 38.8
 0 -1 -6 634.44 38.2
 0 -1 -6 669.33 38.3
 0 -1 -6 731.73 38.1
 0 -1 -6 740.33 38.3
 0 -1 -6 703.43 37.2
 1 1 6 716.23 39.8
 1 1 6 661.43 39.3
 1 1 6 735.63 38.8
 1 1 6 732.33 39.5
 1 1 6 699.63 40.2
 1 1 6 787.02 38.9
 1 1 6 781.92 39.6
 1 1 6 725.73 38.4
 -1 -1 -6 772.82 38.5
 -1 -1 -6 725.63 39.2
 -1 -1 -6 722.53 39.8
 -1 -1 -6 733.03 39
 -1 -1 -6 762.22 39.5
 -1 -1 -6 671.63 39.6
 -1 -1 -6 652.63 39.6
 -1 -1 -6 709.93 39
 -1 -1 -6 758.72 40.2
 2 1 6 1462.05 76.89
 2 1 6 1477.75 76.59
 2 1 6 1516.45 77.19
 2 1 6 1435.76 77.19
 2 1 6 1446.46 77.39
 2 1 6 1348.47 77.79
 2 1 6 1371.76 76.99
 -2 -1 -6 1376.56 77.39
 -2 -1 -6 1522.35 76.69
 -2 -1 -6 1487.45 77.59
 -2 -1 -6 1571.44 77.89
 -2 -1 -6 1436.26 77.29
 -2 -1 -6 1508.05 77.09
 -2 -1 -6 1411.66 77.29
 3 1 6 176.38 12
 3 1 6 166.38 11.7
 3 1 6 200.58 12.4
 3 1 6 172.18 11.6
 3 1 6 169.58 10.8
 3 1 6 186.18 12
 3 1 6 151.58 12.2
 -3 -1 -6 168.28 11.8
 -3 -1 -6 189.58 11.1
 -3 -1 -6 179.08 11.4
 -3 -1 -6 186.78 12.9
 -3 -1 -6 177.68 12
 -3 -1 -6 173.78 12
 -3 -1 -6 177.28 12.5
 4 1 6 2507.85 118.99
 4 1 6 2097.09 117.99
 4 1 6 2278.87 118.09
 4 1 6 2378.06 118.09
 4 1 6 2337.57 117.39
 4 1 6 2111.69 117.39
 4 1 6 1986.1 117.59
 4 1 6 2359.86 116.69
 4 1 6 2093.49 117.19
 4 1 6 2213.68 118.39
 -4 -1 -6 2294.07 116.89
 -4 -1 -6 2450.55 116.99
 -4 -1 -6 2236.68 117.59
 -4 -1 -6 2079.79 118.69
 -4 -1 -6 2339.47 118.39
 -4 -1 -6 2067.29 118.39
 -4 -1 -6 1969.7 119.09
 -4 -1 -6 2258.67 117.29
 -4 -1 -6 2253.77 117.59
 5 1 6 414.46 24.9
 5 1 6 414.66 22.8
 5 1 6 399.86 23.8
 5 1 6 432.16 25.8
 5 1 6 424.56 23.3
 5 1 6 450.75 25.8
 5 1 6 402.26 24.9
 5 1 6 392.56 24.6
 5 1 6 415.16 23.8
 5 1 6 429.86 24.1
 5 1 6 398.56 22.8
 -5 -1 -6 448.36 24.3
 -5 -1 -6 432.96 24.1
 -5 -1 -6 403.76 23.1
 -5 -1 -6 408.66 23.5
 -5 -1 -6 402.56 22.8
 -5 -1 -6 382.16 26.6
 -5 -1 -6 352.26 25.6
 -5 -1 -6 432.16 25.5
 -5 -1 -6 416.66 27.1
 -5 -1 -6 363.06 25.4
 6 1 6 93.29 7.5
 6 1 6 91.79 8.8
 6 1 6 84.89 6.9
 6 1 6 84.69 10.3
 6 1 6 79.49 10
 6 1 6 82.19 7.3
 6 1 6 87.99 6.7
 6 1 6 74.19 8.3
 6 1 6 92.29 7.2
 6 1 6 71.99 8.3
 6 1 6 83.79 7.8
 6 1 6 74.69 7.2
 -6 -1 -6 82.39 7.1
 -6 -1 -6 67.69 9.7
 -6 -1 -6 98.49 12.4
 -6 -1 -6 88.69 9.8
 -6 -1 -6 70.89 10.4
 -6 -1 -6 86.49 7.4
 -6 -1 -6 90.99 11.8
 -6 -1 -6 78.39 7
 7 1 6 2343.97 116.49
 7 1 6 2152.88 116.29
 7 1 6 2106.99 119.39
 7 1 6 2224.38 118.39
 7 1 6 2088.99 119.19
 7 1 6 2212.98 119.09
 7 1 6 2114.79 117.29
 7 1 6 2241.28 116.09
 7 1 6 2111.89 115.89
 7 1 6 2225.98 116.49
 7 1 6 2244.18 116.49
 7 1 6 2158.38 117.49
 7 1 6 2213.58 118.49
 -7 -1 -6 2254.67 120.19
 -7 -1 -6 2178.68 118.69
 -7 -1 -6 2112.29 116.19
 -7 -1 -6 2222.78 115.79
 -7 -1 -6 2202.08 119.69
 -7 -1 -6 2199.38 120.99
 -7 -1 -6 2394.76 121.59
 -7 -1 -6 2202.68 116.29
 8 1 6 2640.74 142.59
 8 1 6 2809.12 142.19
 8 1 6 2676.33 142.09
 8 1 6 2578.94 144.59
 8 1 6 2716.83 143.69
 8 1 6 2692.93 142.19
 8 1 6 2757.02 143.19
 8 1 6 2688.53 143.49
 8 1 6 2832.42 142.09
 -8 -1 -6 2834.72 146.89
 -8 -1 -6 2606.24 147.39
 -8 -1 -6 2587.54 140.99
 -8 -1 -6 2497.15 141.09
 -8 -1 -6 2778.92 146.19
 -8 -1 -6 2858.61 147.99
 -8 -1 -6 2619.94 144.79
 9 1 6 40.1 5.8
 9 1 6 40.1 7.4
 9 1 6 51.59 6.7
 9 1 6 46.2 7.2
 9 1 6 43.3 5.9
 9 1 6 32.1 10
 9 1 6 43.3 6
 9 1 6 44.9 6.1
 9 1 6 49.9 9.6
 9 1 6 38 8.1
 -9 -1 -6 35.2 3.8
 -9 -1 -6 58.29 10.8
 -9 -1 -6 35.7 3.9
 -9 -1 -6 45.7 11.6
 -9 -1 -6 45.8 10.7
 -9 -1 -6 43.7 11.2
 -9 -1 -6 55.89 9.9
 10 1 6 187.38 14.1
 10 1 6 200.08 15.7
 10 1 6 211.28 14.1
 10 1 6 205.88 13.7
 10 1 6 181.88 13.7
 10 1 6 191.98 15.1
 10 1 6 187.98 13.5
 10 1 6 200.78 14.8
 -10 -1 -6 230.08 21.2
 -10 -1 -6 189.28 17.7
 -10 -1 -6 198.88 19.3
 -10 -1 -6 185.78 19.5
 -10 -1 -6 174.68 21.5
 11 1 6 76.49 8.5
 11 1 6 93.49 9.9
 11 1 6 87.39 8.5
 11 1 6 82.99 8.4
 11 1 6 70.49 9.8
 11 1 6 76.69 7.7
 11 1 6 71.29 7.6
 11 1 6 68.39 8.7
 -11 -1 -6 89.09 16.4
 -11 -1 -6 89.69 15.4
 -11 -1 -6 81.59 12.5
 -11 -1 -6 83.09 15.4
 -11 -1 -6 81.29 15
 12 1 6 -0.2 5.5
 12 1 6 6 4
 12 1 6 11.4 4.7
 12 1 6 13.2 3.6
 12 1 6 16.2 4.6
 12 1 6 8.2 3.8
 12 1 6 12.1 4.4
 -12 -1 -6 7.7 9.1
 -12 -1 -6 7.3 9.8
 -12 -1 -6 16 9.7
 -12 -1 -6 11.5 7.2
 13 1 6 0.7 2.9
 13 1 6 -2.3 3.7
 13 1 6 0.2 3.7
 13 1 6 7.8 3.8
 13 1 6 -2.4 2.3
 -13 -1 -6 8.1 10.1
 -13 -1 -6 -5.8 9.4
 -13 -1 -6 8.3 10.5
 14 1 6 12.2 4.7
 14 1 6 21 5
 -14 -1 -6 16.1 9.6
 -14 -1 -6 23 11.7
 -15 -1 -6 1.5 10.6
 -15 -1 -6 6.3 10.5
 14 -1 -7 32.6 7.5
 14 -1 -7 32.7 9.1
 13 -1 -7 26.9 8.3
 13 -1 -7 11.7 5.6
 13 -1 -7 15.2 2.4
 13 -1 -7 22 2.9
 12 -1 -7 10 5.6
 12 -1 -7 3.9 7.1
 12 -1 -7 4.5 2
 12 -1 -7 2.3 2.4
 -11 1 7 55.09 10.8
 -11 1 7 48.1 11.4
 11 -1 -7 51.09 8.1
 11 -1 -7 49.1 4.2
 11 -1 -7 45.2 9.9
 11 -1 -7 40.9 4.8
 -10 1 7 230.18 20.1
 -10 1 7 199.18 19.6
 -10 1 7 235.88 19.5
 -10 1 7 201.18 18.8
 10 -1 -7 240.48 14
 10 -1 -7 216.38 18
 10 -1 -7 225.08 18.5
 10 -1 -7 227.78 13.4
 10 -1 -7 207.58 17.1
 10 -1 -7 244.78 19.5
 10 -1 -7 280.57 17.4
 -9 1 7 72.49 10.1
 -9 1 7 55.69 11.2
 -9 1 7 48 10.3
 -9 1 7 64.59 10.7
 -9 1 7 81.59 11.3
 9 -1 -7 77.59 9.8
 9 -1 -7 54.49 4
 9 -1 -7 54.29 4
 9 -1 -7 57.89 8.1
 9 -1 -7 58.39 9.2
 9 -1 -7 78.69 11.7
 9 -1 -7 66.79 11.1
 9 -1 -7 54.09 4.8
 9 -1 -7 65.29 11.9
 9 -1 -7 65.09 9.2
 9 -1 -7 58.39 5.3
 9 -1 -7 58.89 11.8
 9 -1 -7 59.69 8.6
 -8 1 7 810.92 44.6
 -8 1 7 619.64 43.3
 -8 1 7 702.83 42.8
 -8 1 7 714.43 43.3
 -8 1 7 721.83 42.4
 -8 1 7 745.43 43.9
 8 -1 -7 707.03 39.2
 8 -1 -7 718.73 42.5
 8 -1 -7 734.73 39.1
 8 -1 -7 686.13 45.3
 8 -1 -7 734.53 41.5
 8 -1 -7 755.62 41.4
 8 -1 -7 796.32 42.8
 8 -1 -7 723.43 45.7
 8 -1 -7 724.13 39
 8 -1 -7 755.82 39.2
 8 -1 -7 678.83 43
 8 -1 -7 704.53 44.2
 8 -1 -7 710.83 48.7
 8 -1 -7 766.92 42.1
 8 -1 -7 739.73 43.2
 -7 1 7 46.3 7.9
 -7 1 7 42.3 8.3
 -7 1 7 38 8.1
 -7 1 7 47.8 7.3
 -7 1 7 40.9 7.7
 -7 1 7 45.3 8.1
 7 -1 -7 44.2 8.1
 7 -1 -7 39.1 6.1
 7 -1 -7 44.9 4.7
 7 -1 -7 36.4 6.9
 7 -1 -7 50.79 7.5
 7 -1 -7 38.7 4.5
 7 -1 -7 47.3 7.8
 7 -1 -7 47.7 7.1
 7 -1 -7 49.3 6.4
 7 -1 -7 35.8 4.2
 7 -1 -7 44.6 9.4
 7 -1 -7 53.99 10.1
 7 -1 -7 43.8 6.8
 7 -1 -7 44.3 7.2
 7 -1 -7 49.7 9.8
 7 -1 -7 39 4
 -6 1 7 262.27 14.6
 -6 1 7 272.37 19
 -6 1 7 276.67 14.6
 -6 1 7 276.97 18.1
 -6 1 7 263.07 17.3
 -6 1 7 261.07 18.8
 -6 1 7 244.48 18.4
 -6 1 7 249.68 18.1
 6 -1 -7 288.27 19.3
 6 -1 -7 272.37 18.6
 6 -1 -7 255.87 17.7
 6 -1 -7 271.77 17.6
 6 -1 -7 287.77 17.1
 6 -1 -7 305.37 18
 6 -1 -7 253.87 19.8
 6 -1 -7 251.97 16.7
 6 -1 -7 279.37 16.2
 6 -1 -7 260.07 18
 6 -1 -7 257.87 17.2
 6 -1 -7 252.17 20
 6 -1 -7 277.67 15.5
 6 -1 -7 267.87 20
 6 -1 -7 281.87 15.7
 -5 1 7 161.38 15
 -5 1 7 230.68 14.4
 -5 1 7 207.68 14.5
 -5 1 7 217.58 13
 -5 1 7 212.48 15.2
 -5 1 7 232.88 15
 -5 1 7 209.48 15.4
 -5 1 7 208.08 15.6
 5 -1 -7 222.48 14
 5 -1 -7 239.68 14.4
 5 -1 -7 210.48 14.7
 5 -1 -7 214.48 13.8
 5 -1 -7 220.78 13.3
 5 -1 -7 226.38 17.1
 5 -1 -7 222.88 13.2
 5 -1 -7 216.18 16.8
 5 -1 -7 226.88 13.8
 5 -1 -7 235.28 14.7
 5 -1 -7 232.38 15
 5 -1 -7 243.08 15.9
 5 -1 -7 230.68 16.8
 5 -1 -7 251.27 15
 5 -1 -7 223.88 14.4
 -4 1 7 524.45 30.4
 -4 1 7 474.35 30.6
 -4 1 7 488.75 29.4
 -4 1 7 512.75 29.8
 -4 1 7 545.75 29.3
 -4 1 7 441.96 30.1
 -4 1 7 553.24 29.8
 -4 1 7 564.24 30.4
 -4 1 7 538.45 29
 4 -1 -7 572.74 30
 4 -1 -7 530.25 29.7
 4 -1 -7 538.15 32
 4 -1 -7 500.45 29.4
 4 -1 -7 502.25 28.8
 4 -1 -7 515.85 30.7
 4 -1 -7 526.75 29.6
 4 -1 -7 546.25 29.1
 4 -1 -7 552.54 29.7
 4 -1 -7 564.44 32.1
 4 -1 -7 528.85 29.2
 -3 1 7 2870.31 144.49
 -3 1 7 2478.35 146.09
 -3 1 7 2628.84 145.99
 -3 1 7 2733.83 144.49
 -3 1 7 2985.6 145.29
 -3 1 7 2470.35 146.69
 -3 1 7 2830.42 145.99
 -3 1 7 2918.41 145.49
 -3 1 7 2944.31 145.79
 -3 1 7 2796.12 144.79
 3 -1 -7 2854.41 146.39
 3 -1 -7 2677.73 145.09
 3 -1 -7 2647.14 144.59
 3 -1 -7 2891.31 145.59
 3 -1 -7 2697.23 145.69
 3 -1 -7 2794.62 145.99
 3 -1 -7 3043.3 147.69
 3 -1 -7 2861.61 145.39
 3 -1 -7 2700.63 144.99
 -2 1 7 -0.1 2.9
 -2 1 7 3.9 2.3
 -2 1 7 2.7 2.4
 -2 1 7 4.6 2.1
 -2 1 7 0.5 2.3
 -2 1 7 3.6 2
 -2 1 7 3.2 1.3
 -2 1 7 1.6 2.5
 -2 1 7 -4.1 2.7
 2 -1 -7 3.3 2.7
 2 -1 -7 1 2.6
 2 -1 -7 3.9 2.4
 2 -1 -7 5.7 3.6
 2 -1 -7 2.2 1.2
 2 -1 -7 5.4 2.5
 2 -1 -7 0.6 2
 2 -1 -7 0.4 2.8
 -1 1 7 4680.23 232.98
 1 -1 -7 4354.06 230.18
 1 -1 -7 4515.65 232.18
 1 -1 -7 4210.18 232.28
 1 -1 -7 4657.63 231.98
 1 -1 -7 4332.17 232.68
 0 1 7 2767.42 154.78
 0 1 7 3168.88 155.08
 0 1 7 2908.91 154.28
 0 1 7 3117.29 154.98
 0 1 7 3006.6 155.98
 0 -1 -7 3188.08 155.08
 0 -1 -7 2713.63 155.08
 0 -1 -7 2760.72 153.68
 0 -1 -7 3084.29 154.38
 0 -1 -7 2884.21 155.68
 0 -1 -7 2867.41 155.08
 0 -1 -7 2895.61 155.38
 0 -1 -7 3168.58 154.88
 1 1 7 2153.98 115.29
 1 1 7 2121.69 114.69
 1 1 7 2264.77 113.59
 1 1 7 2292.27 114.49
 1 1 7 1989.2 114.19
 1 1 7 2210.08 113.19
 1 1 7 2350.66 113.59
 1 1 7 2273.47 114.49
 -1 -1 -7 2250.27 114.39
 -1 -1 -7 2211.38 114.89
 -1 -1 -7 2193.08 115.09
 -1 -1 -7 2258.17 113.89
 -1 -1 -7 2238.28 113.39
 -1 -1 -7 2092.09 114.69
 -1 -1 -7 2030.3 113.69
 -1 -1 -7 1920.11 114.49
 -1 -1 -7 2105.19 113.99
 2 1 7 2235.18 123.29
 2 1 7 2374.46 122.89
 2 1 7 2354.66 123.49
 2 1 7 2464.65 123.09
 2 1 7 2258.27 124.19
 2 1 7 2160.58 123.09
 2 1 7 2299.67 121.69
 -2 -1 -7 2462.55 123.29
 -2 -1 -7 2473.25 124.09
 -2 -1 -7 2374.76 123.79
 -2 -1 -7 2274.37 123.19
 -2 -1 -7 2236.98 123.39
 -2 -1 -7 2442.76 123.79
 -2 -1 -7 2411.36 122.69
 3 1 7 42.9 5.6
 3 1 7 33.6 5.5
 3 1 7 51.59 5.9
 3 1 7 40.8 5.4
 3 1 7 46.2 4.6
 3 1 7 25.1 5.4
 3 1 7 35.5 5.1
 -3 -1 -7 40.8 5.8
 -3 -1 -7 46.4 4.9
 -3 -1 -7 44.9 5.9
 -3 -1 -7 43.7 5.7
 -3 -1 -7 46.2 5.4
 -3 -1 -7 37.5 5.9
 -3 -1 -7 41.2 5.9
 4 1 7 1881.81 115.29
 4 1 7 2171.78 116.59
 4 1 7 2025.8 114.59
 4 1 7 2222.38 115.79
 4 1 7 2197.78 115.19
 4 1 7 2116.99 114.59
 4 1 7 2319.87 113.99
 -4 -1 -7 2016.7 115.59
 -4 -1 -7 2092.89 115.99
 -4 -1 -7 2251.97 114.19
 -4 -1 -7 2321.67 115.49
 -4 -1 -7 2338.37 114.99
 -4 -1 -7 2256.57 114.29
 -4 -1 -7 2245.58 115.59
 -4 -1 -7 2100.19 114.89
 5 1 7 21.4 5.4
 5 1 7 23.5 4.2
 5 1 7 19.6 4.3
 5 1 7 25.5 5.5
 5 1 7 19.9 4.8
 5 1 7 15 4.5
 5 1 7 18.1 2.7
 5 1 7 10 4.2
 5 1 7 15.3 4.3
 5 1 7 16.6 4.5
 5 1 7 21.1 3.6
 -5 -1 -7 18.3 3.9
 -5 -1 -7 11.2 4.7
 -5 -1 -7 10.8 4.9
 -5 -1 -7 9.5 5.5
 -5 -1 -7 17.1 4.2
 -5 -1 -7 18.4 3.4
 -5 -1 -7 18.6 5.3
 -5 -1 -7 16.7 3.9
 -5 -1 -7 17.7 3.6
 6 1 7 191.08 13.6
 6 1 7 216.88 12.8
 6 1 7 195.98 14.6
 6 1 7 179.38 14.4
 6 1 7 208.28 15.5
 6 1 7 220.28 13.7
 6 1 7 188.88 13.3
 6 1 7 199.38 12
 6 1 7 196.88 13.5
 6 1 7 195.38 12.1
 6 1 7 202.78 15.5
 6 1 7 176.68 15.7
 6 1 7 179.78 14.1
 -6 -1 -7 207.18 13.5
 -6 -1 -7 206.58 12.1
 -6 -1 -7 187.88 11.7
 -6 -1 -7 180.08 16.9
 -6 -1 -7 205.18 13.1
 -6 -1 -7 195.78 13.4
 -6 -1 -7 221.28 18.3
 -6 -1 -7 153.18 15.2
 -6 -1 -7 211.88 15.7
 -6 -1 -7 205.08 16.5
 7 1 7 881.41 50.39
 7 1 7 859.71 47.7
 7 1 7 931.31 51.09
 7 1 7 785.22 48.7
 7 1 7 886.61 47.9
 7 1 7 853.91 46.9
 7 1 7 830.42 49.5
 7 1 7 855.81 47.9
 7 1 7 902.71 49.7
 7 1 7 875.01 49
 7 1 7 881.61 48.7
 7 1 7 891.41 47.1
 7 1 7 854.31 46.9
 -7 -1 -7 874.51 50.19
 -7 -1 -7 837.22 47.4
 -7 -1 -7 867.91 52.49
 -7 -1 -7 881.01 47.4
 -7 -1 -7 884.71 52.69
 -7 -1 -7 826.52 47.5
 -7 -1 -7 810.92 50.59
 -7 -1 -7 858.21 51.39
 8 1 7 43.7 7.9
 8 1 7 44.1 6.4
 8 1 7 35.6 5.7
 8 1 7 36.8 5.9
 8 1 7 37.6 7.8
 8 1 7 37.4 5.5
 8 1 7 44.5 7.4
 8 1 7 44.7 6.6
 8 1 7 33.1 8.7
 8 1 7 43.8 6.5
 8 1 7 39.7 7
 8 1 7 43.8 7.4
 -8 -1 -7 40 9
 -8 -1 -7 44.5 11.2
 -8 -1 -7 34.6 5.2
 -8 -1 -7 47 9.2
 -8 -1 -7 47.2 11.9
 -8 -1 -7 61.89 11
 -8 -1 -7 44.9 5.8
 9 1 7 222.38 16.1
 9 1 7 232.98 14.5
 9 1 7 227.28 15
 9 1 7 191.88 16
 9 1 7 222.38 14.8
 9 1 7 205.68 17
 9 1 7 201.68 14.6
 9 1 7 209.48 14.6
 9 1 7 211.28 14.4
 9 1 7 213.68 16
 -9 -1 -7 189.98 13.1
 -9 -1 -7 199.78 13
 -9 -1 -7 200.38 19.1
 -9 -1 -7 213.48 18.2
 -9 -1 -7 204.38 21.1
 -9 -1 -7 231.38 20.4
 -9 -1 -7 248.18 22
 10 1 7 -3.6 2.6
 10 1 7 1.4 3.6
 10 1 7 8.4 4.9
 10 1 7 -2 3
 10 1 7 -0.2 3.5
 10 1 7 5.7 4.5
 10 1 7 -2.4 3.2
 10 1 7 9.7 3.9
 10 1 7 5.1 4.4
 -10 -1 -7 -8.5 7.7
 -10 -1 -7 -4.3 6.7
 -10 -1 -7 0.3 1.1
 -10 -1 -7 1.7 0.9
 -10 -1 -7 3 6.1
 -10 -1 -7 -2.5 7.5
 -10 -1 -7 5.7 8.4
 11 1 7 11.7 4.3
 11 1 7 12.5 4.3
 11 1 7 7.3 5
 11 1 7 12.3 5.3
 11 1 7 12.5 4.8
 11 1 7 18.6 4.8
 11 1 7 9.6 4
 -11 -1 -7 0.3 8.6
 -11 -1 -7 20.3 10.4
 -11 -1 -7 14.3 7.3
 -11 -1 -7 11.2 9.9
 -11 -1 -7 1.6 9.1
 12 1 7 5.9 4.3
 12 1 7 21.8 4.8
 12 1 7 24.9 6.1
 12 1 7 19 5.3
 12 1 7 10.8 4.7
 -12 -1 -7 -2.1 8.5
 -12 -1 -7 28.9 11.2
 -12 -1 -7 30.7 9.4
 -12 -1 -7 2.5 11.7
 13 1 7 40.5 6
 13 1 7 32.7 5.3
 13 1 7 39.7 7.3
 13 1 7 57.49 7.1
 13 1 7 45.1 7
 -13 -1 -7 34.1 12.9
 -13 -1 -7 52.89 14.2
 -13 -1 -7 65.09 14.7
 14 1 7 41.9 7.4
 14 1 7 33.5 4.3
 14 1 7 46.6 7.3
 -14 -1 -7 30.1 13.3
 -14 -1 -7 54.59 14.5
 -14 -1 -7 36.2 13.6
 14 -1 -8 6.4 5
 14 -1 -8 14.6 9
 13 -1 -8 3.8 6.7
 13 -1 -8 6.3 2.9
 13 -1 -8 5.7 5.4
 -12 1 8 128.59 16.5
 -12 1 8 116.79 17.4
 12 -1 -8 116.29 15.4
 12 -1 -8 108.79 11.4
 12 -1 -8 113.39 8.8
 -11 1 8 117.39 16.9
 -11 1 8 131.39 16
 -11 1 8 107.59 14.9
 11 -1 -8 110.59 14.5
 11 -1 -8 110.29 8.5
 11 -1 -8 120.69 9
 11 -1 -8 134.69 11.8
 -10 1 8 8.8 7.5
 -10 1 8 14.4 8.3
 -10 1 8 13.3 6.9
 -10 1 8 6.7 7.6
 10 -1 -8 10.7 5
 10 -1 -8 10 5.2
 10 -1 -8 11.9 7.3
 10 -1 -8 12.3 5.6
 10 -1 -8 12.8 3.4
 10 -1 -8 10.3 2.5
 -9 1 8 61.69 11.4
 -9 1 8 69.09 11.7
 -9 1 8 61.49 10.3
 -9 1 8 68.59 11.3
 -9 1 8 57.39 9
 9 -1 -8 74.89 8.6
 9 -1 -8 50.89 5.8
 9 -1 -8 60.69 10.6
 9 -1 -8 61.29 8.9
 9 -1 -8 55.29 5
 9 -1 -8 63.19 9.2
 9 -1 -8 58.99 4.9
 9 -1 -8 55.09 5.3
 9 -1 -8 54.89 11.5
 9 -1 -8 47.7 8
 9 -1 -8 65.39 9.6
 -8 1 8 550.24 34.9
 -8 1 8 469.35 33.7
 -8 1 8 558.94 33.9
 -8 1 8 536.85 33
[truncated: 6,355,617 more chars]
